# Supplementary material for: Stepwise polarisation of developing bilayered epidermis is mediated by aPKC and E-cadherin in zebrafish
Source: eLife journal article supplement (doi:10.7554/elife.49064), 2020-01-22
Supplement: fig4-data2 [file elife-49064-fig4-data2-v1.csv]

Genotype	Boundary	Cell name	Area	Mean	Min	Max	Length
Ctrl MO CO	Clone- Clone	h1b1	9.348	1889.716	331.228	4095	15.112
Ctrl MO CO	Clone- Clone	h1b1	9.348	1672.046	245.722	4095	15.112
Ctrl MO CO	Clone- Clone	h1b1	9.348	1276.583	126.127	4095	15.112
Ctrl MO CO	Clone- Clone	h1b1	9.348	890.326	90.684	3776.194	15.112
Ctrl MO CO	Clone- Clone	h1b1	9.348	724.711	51.757	4087.585	15.112
Ctrl MO CO	Clone- Clone
Ctrl MO CO	Clone- Clone	h1b2	8.213	1921.262	449.913	4095	13.267
Ctrl MO CO	Clone- Clone	h1b2	8.213	1430.307	276.216	4095	13.267
Ctrl MO CO	Clone- Clone	h1b2	8.213	886.459	174.004	3872.769	13.267
Ctrl MO CO	Clone- Clone	h1b2	8.213	613.795	73.582	4095	13.267
Ctrl MO CO	Clone- Clone	h1b2	8.213	449.223	65.933	4053.158	13.267
Ctrl MO CO	Clone- Clone
Ctrl MO CO	Clone- Clone	h1b3	6.052	1458.315	310.539	3866.8	9.752
Ctrl MO CO	Clone- Clone	h1b3	6.052	1409.08	246.097	4057.574	9.752
Ctrl MO CO	Clone- Clone	h1b3	6.052	1097.363	321.421	3300.22	9.752
Ctrl MO CO	Clone- Clone	h1b3	6.052	716.998	213.709	3711.205	9.752
Ctrl MO CO	Clone- Clone	h1b3	6.052	486.856	83.452	3407.068	9.752
Ctrl MO CO	Clone- Clone
Ctrl MO CO	Clone- Clone	h1b4	7.619	1985.888	299.187	4095	12.3
Ctrl MO CO	Clone- Clone	h1b4	7.619	2187.194	364.948	4095	12.3
Ctrl MO CO	Clone- Clone	h1b4	7.619	1732.281	271.742	4095	12.3
Ctrl MO CO	Clone- Clone	h1b4	7.619	1551.929	283.204	4095	12.3
Ctrl MO CO	Clone- Clone	h1b4	7.619	1219.96	193.531	4094.95	12.3
Ctrl MO CO	Clone- Clone	h1b4	7.619	756.036	156.88	4085.495	12.3
Ctrl MO CO	Clone- Clone
Ctrl MO CO	Clone- Clone	h1b5	4.701	1659.908	287.15	4095	7.556
Ctrl MO CO	Clone- Clone	h1b5	4.701	1590.979	288.747	4095	7.556
Ctrl MO CO	Clone- Clone	h1b5	4.701	1363.684	157.09	4095	7.556
Ctrl MO CO	Clone- Clone	h1b5	4.701	802.123	35.193	3025.029	7.556
Ctrl MO CO	Clone- Clone	h1b5	4.701	480.266	56.505	2912.286	7.556
Ctrl MO CO	Clone- Clone
Ctrl MO CO	Clone- Clone	h1b6	8.375	1208.735	134.926	4095	13.53
Ctrl MO CO	Clone- Clone	h1b6	8.375	1170.538	176.255	4095	13.53
Ctrl MO CO	Clone- Clone	h1b6	8.375	1064.563	126.571	4095	13.53
Ctrl MO CO	Clone- Clone	h1b6	8.375	911.828	101.248	4042.524	13.53
Ctrl MO CO	Clone- Clone	h1b6	8.375	738.984	91.851	4079.766	13.53
Ctrl MO CO	Clone- Clone	h1b6	8.375	472.958	55.444	3412.098	13.53
Ctrl MO CO	Clone- Clone	h1b6	8.375	298.629	64.3	1145.87	13.53
Ctrl MO CO	Clone- Clone
Ctrl MO CO	Clone- Clone	h1b7	9.24	874.102	93.78	4095	14.936
Ctrl MO CO	Clone- Clone	h1b7	9.24	944.57	89.361	4095	14.936
Ctrl MO CO	Clone- Clone	h1b7	9.24	819.323	101.776	4095	14.936
Ctrl MO CO	Clone- Clone	h1b7	9.24	741.069	78.718	4095	14.936
Ctrl MO CO	Clone- Clone	h1b7	9.24	709.406	75.782	4095	14.936
Ctrl MO CO	Clone- Clone	h1b7	9.24	579.275	31.353	3893.48	14.936
Ctrl MO CO	Clone- Clone
Ctrl MO CO	Clone- Clone	h1b8	7.078	1699.407	168.606	4095	11.422
Ctrl MO CO	Clone- Clone	h1b8	7.078	1714.51	149.002	4095	11.422
Ctrl MO CO	Clone- Clone	h1b8	7.078	1421.423	96.621	4092.013	11.422
Ctrl MO CO	Clone- Clone	h1b8	7.078	786.098	109.073	4095	11.422
Ctrl MO CO	Clone- Clone	h1b8	7.078	570.432	89.909	4088.636	11.422
Ctrl MO CO	Clone- Clone	h1b8	7.078	400.931	50.533	2000.897	11.422
Ctrl MO CO	Clone- Clone
Ctrl MO CO	Clone- Clone	h1b9	8.591	1754.214	286.521	4095	13.882
Ctrl MO CO	Clone- Clone	h1b9	8.591	1793.342	314.749	4095	13.882
Ctrl MO CO	Clone- Clone	h1b9	8.591	1453.1	348.405	4095	13.882
Ctrl MO CO	Clone- Clone	h1b9	8.591	712.089	129.135	3921.263	13.882
Ctrl MO CO	Clone- Clone	h1b9	8.591	442.898	68.141	2956.253	13.882
Ctrl MO CO	Clone- Clone
Ctrl MO CO	Clone- Clone	h1b10	8.483	1598.56	263.553	4095	13.706
Ctrl MO CO	Clone- Clone	h1b10	8.483	1708.099	256.377	4095	13.706
Ctrl MO CO	Clone- Clone	h1b10	8.483	1683.274	301.992	4095	13.706
Ctrl MO CO	Clone- Clone	h1b10	8.483	1357.627	191.106	4095	13.706
Ctrl MO CO	Clone- Clone	h1b10	8.483	648.274	118.243	2885.196	13.706
Ctrl MO CO	Clone- Clone	h1b10	8.483	428.183	65.825	1682.507	13.706
Ctrl MO CO	Clone- Clone	h1b10	8.483	288.509	28.191	1011.612	13.706
Ctrl MO CO	Clone- Clone
Ctrl MO CO	Clone- Clone	h1b11	7.511	1641.538	365.913	4095	12.125
Ctrl MO CO	Clone- Clone	h1b11	7.511	2000.949	334.857	4095	12.125
Ctrl MO CO	Clone- Clone	h1b11	7.511	1531.512	206.93	4081.383	12.125
Ctrl MO CO	Clone- Clone	h1b11	7.511	1100.963	299.463	4095	12.125
Ctrl MO CO	Clone- Clone	h1b11	7.511	823.251	163.783	4095	12.125
Ctrl MO CO	Clone- Clone
Ctrl MO CO	Clone- Clone	h1b12	4.917	989.784	238.164	2926.037	7.907
Ctrl MO CO	Clone- Clone	h1b12	4.917	626.064	117.38	2136.596	7.907
Ctrl MO CO	Clone- Clone	h1b12	4.917	436.425	135.98	1994.942	7.907
Ctrl MO CO	Clone- Clone	h1b12	4.917	263.199	65.456	1048.276	7.907
Ctrl MO CO	Clone- Clone
Ctrl MO CO	Clone- Clone	h1b13	2.702	1446.133	119.114	4095	4.305
Ctrl MO CO	Clone- Clone	h1b13	2.702	1162.326	245.369	4095	4.305
Ctrl MO CO	Clone- Clone	h1b13	2.702	879.118	141.619	4095	4.305
Ctrl MO CO	Clone- Clone	h1b13	2.702	652.215	96.185	3400.072	4.305
Ctrl MO CO	Clone- Clone
Ctrl MO CO	Clone- Clone	h1b14	3.188	1445.28	257.259	4095	5.096
Ctrl MO CO	Clone- Clone	h1b14	3.188	1129.166	148.431	4095	5.096
Ctrl MO CO	Clone- Clone	h1b14	3.188	816.866	122.904	3485.67	5.096
Ctrl MO CO	Clone- Clone	h1b14	3.188	552.037	73.829	2296.846	5.096
Ctrl MO CO	Clone- Clone	h1b14	3.188	333.942	65.319	1260.177	5.096
Ctrl MO CO	Clone- Clone
Ctrl MO CO	Clone- Clone	h1b15	9.726	1957.825	295.964	4095	15.727
Ctrl MO CO	Clone- Clone	h1b15	9.726	1993.597	360.812	4095	15.727
Ctrl MO CO	Clone- Clone	h1b15	9.726	1944.524	327.12	4095	15.727
Ctrl MO CO	Clone- Clone	h1b15	9.726	1719.607	293.376	4095	15.727
Ctrl MO CO	Clone- Clone	h1b15	9.726	1348.069	195.698	4094.212	15.727
Ctrl MO CO	Clone- Clone	h1b15	11.077	1013.473	231.592	3026.622	17.923
Ctrl MO CO	Clone- Clone	h1b15	11.077	817.256	145.895	3535.339	17.923
Ctrl MO CO	Clone- Clone	h1b15	11.077	697.148	97.729	3506.26	17.923
Ctrl MO CO	Clone- Clone	h1b15	11.077	570.032	55.875	4095	17.923
Ctrl MO CO	Clone- Clone
Ctrl MO CO	Clone- Clone	h1b16	10.861	2074.523	239.292	4095	17.572
Ctrl MO CO	Clone- Clone	h1b16	10.861	1952.023	191.508	4095	17.572
Ctrl MO CO	Clone- Clone	h1b16	10.861	1537.708	197.999	4095	17.572
Ctrl MO CO	Clone- Clone	h1b16	10.861	878.783	175.009	2605.172	17.572
Ctrl MO CO	Clone- Clone	h1b16	10.861	684.774	151.34	4082.417	17.572
Ctrl MO CO	Clone- Clone	h1b16	10.861	620.152	107.05	4095	17.572
Ctrl MO CO	Clone- Clone
Ctrl MO CO	Clone- Clone	h1b17	5.241	1645.462	264.479	4095	8.434
Ctrl MO CO	Clone- Clone	h1b17	5.241	1036.168	241.358	4095	8.434
Ctrl MO CO	Clone- Clone	h1b17	5.241	839.539	128.194	4095	8.434
Ctrl MO CO	Clone- Clone	h1b17	5.241	660.239	86.732	4086.467	8.434
Ctrl MO CO	Clone- Clone	h1b17	5.241	425.146	45.843	2137.088	8.434
Ctrl MO CO	Clone- Clone
Ctrl MO CO	Clone- Clone	h1b18	12.752	1661.712	127.38	4095	20.647
Ctrl MO CO	Clone- Clone	h1b18	12.752	1594.51	170.086	4095	20.647
Ctrl MO CO	Clone- Clone	h1b18	12.752	1236.625	101.841	4095	20.647
Ctrl MO CO	Clone- Clone	h1b18	12.752	1005.395	112.029	4095	20.647
Ctrl MO CO	Clone- Clone	h1b18	12.752	756.13	76.331	4095	20.647
Ctrl MO CO	Clone- Clone	h1b18	12.752	585.079	32.736	4095	20.647
Ctrl MO CO	Clone- Clone	h1b18	12.752	388.966	12.219	4074.066	20.647
Ctrl MO CO	Clone- Clone
Ctrl MO CO	Clone- Clone	h1b19	7.403	1697.252	269.018	4095	11.949
Ctrl MO CO	Clone- Clone	h1b19	7.403	1150.28	179.138	4008.745	11.949
Ctrl MO CO	Clone- Clone	h1b19	7.403	858.897	155.877	2890.736	11.949
Ctrl MO CO	Clone- Clone	h1b19	7.403	635.301	164.558	3560.244	11.949
Ctrl MO CO	Clone- Clone	h1b19	7.403	445.147	85.393	1791.548	11.949
Ctrl MO CO	Clone- Clone	h1b19	7.403	351.197	32.438	2098.858	11.949
Ctrl MO CO	Clone- Clone	h2b1	9.078	1227.246	263.616	4095	14.672
Ctrl MO CO	Clone- Clone	h2b1	9.078	780.566	144.392	3916.064	14.672
Ctrl MO CO	Clone- Clone	h2b1	9.078	512.084	110.596	3010.836	14.672
Ctrl MO CO	Clone- Clone
Ctrl MO CO	Clone- Clone	h2b2	14.805	2499.426	246.956	4095	23.985
Ctrl MO CO	Clone- Clone	h2b2	14.805	1974.31	283.301	4095	23.985
Ctrl MO CO	Clone- Clone	h2b2	14.805	1584.191	195.058	4095	23.985
Ctrl MO CO	Clone- Clone	h2b2	14.805	1343.663	78.751	4095	23.985
Ctrl MO CO	Clone- Clone	h2b2	14.805	1049.375	102.651	4095	23.985
Ctrl MO CO	Clone- Clone	h2b2	14.805	661.155	67.981	3606.491	23.985
Ctrl MO CO	Clone- Clone
Ctrl MO CO	Clone- Clone	h2b3	13.671	1975.538	131.155	4095	22.14
Ctrl MO CO	Clone- Clone	h2b3	13.671	1534.271	197.205	4095	22.14
Ctrl MO CO	Clone- Clone	h2b3	13.671	1122.334	147.065	4086.942	22.14
Ctrl MO CO	Clone- Clone	h2b3	13.671	731.575	143.771	3890.962	22.14
Ctrl MO CO	Clone- Clone	h2b3	13.671	431.984	36.091	3909.823	22.14
Ctrl MO CO	Clone- Clone
Ctrl MO CO	Clone- Clone	h2b4	5.457	2432.737	383.177	4095	8.786
Ctrl MO CO	Clone- Clone	h2b4	5.457	1791.385	238.751	4095	8.786
Ctrl MO CO	Clone- Clone	h2b4	5.457	1365.352	177.581	4095	8.786
Ctrl MO CO	Clone- Clone	h2b4	5.457	1034.216	219.457	4095	8.786
Ctrl MO CO	Clone- Clone	h2b4	5.457	812.868	189.162	4095	8.786
Ctrl MO CO	Clone- Clone	h2b4	5.457	512.565	102.042	1655.714	8.786
Ctrl MO CO	Clone- Clone
Ctrl MO CO	Clone- Clone	h2b5	7.078	2751.097	337.949	4095	11.42
Ctrl MO CO	Clone- Clone	h2b5	7.078	2646.558	125.74	4095	11.42
Ctrl MO CO	Clone- Clone	h2b5	7.078	2240.095	308.726	4095	11.42
Ctrl MO CO	Clone- Clone	h2b5	7.078	1521.809	369.44	4095	11.42
Ctrl MO CO	Clone- Clone	h2b5	7.078	824.353	273.424	2788.748	11.42
Ctrl MO CO	Clone- Clone	h2b5	7.078	532.304	100.537	2202.106	11.42
Ctrl MO CO	Clone- Clone
Ctrl MO CO	Clone- Clone	h2b6	6.484	1981.873	182.707	4095	10.455
Ctrl MO CO	Clone- Clone	h2b6	6.484	1289.297	182.018	4083.22	10.455
Ctrl MO CO	Clone- Clone	h2b6	6.484	878.562	150.756	3128.577	10.455
Ctrl MO CO	Clone- Clone	h2b6	6.484	605.705	70.266	4095	10.455
Ctrl MO CO	Clone- Clone	h3b1	7.078	2431.958	560.335	4095	11.422
Ctrl MO CO	Clone- Clone	h3b1	7.078	2651.473	384.909	4095	11.422
Ctrl MO CO	Clone- Clone	h3b1	7.078	2315.114	422.009	4095	11.422
Ctrl MO CO	Clone- Clone	h3b1	7.078	1127.788	271.473	3502.539	11.422
Ctrl MO CO	Clone- Clone	h3b1	7.078	678.382	153.961	2870.854	11.422
Ctrl MO CO	Clone- Clone	h3b1	7.078	516.937	66.922	2051.506	11.422
Ctrl MO CO	Clone- Clone
Ctrl MO CO	Clone- Clone	h3b2	7.349	2317.285	259.422	4095	11.861
Ctrl MO CO	Clone- Clone	h3b2	7.349	2552.1	277.532	4095	11.861
Ctrl MO CO	Clone- Clone	h3b2	7.349	1418.255	240.444	4082.936	11.861
Ctrl MO CO	Clone- Clone	h3b2	7.349	607.566	145.927	3349.348	11.861
Ctrl MO CO	Clone- Clone	h3b2	7.349	417.742	105.26	3636.44	11.861
Ctrl MO CO	Clone- Clone
Ctrl MO CO	Clone- Clone	h3b3	4.863	1765.543	143.314	4095	7.819
Ctrl MO CO	Clone- Clone	h3b3	4.863	1246.526	174.815	4095	7.819
Ctrl MO CO	Clone- Clone	h3b3	4.863	821.969	126.84	4095	7.819
Ctrl MO CO	Clone- Clone	h3b3	4.863	614.488	94.424	4095	7.819
Ctrl MO CO	Clone- Clone
Ctrl MO CO	Clone- Clone	h3b4	5.133	2265.536	196.804	4095	8.259
Ctrl MO CO	Clone- Clone	h3b4	5.133	1546.158	394.724	3710.531	8.259
Ctrl MO CO	Clone- Clone	h3b4	5.133	728.589	210.216	2026.663	8.259
Ctrl MO CO	Clone- Clone	h3b4	5.133	475.676	153.611	1978.489	8.259
Ctrl MO CO	Clone- Clone
Ctrl MO CO	Clone- Clone	h3b5	15.184	2107.392	275.276	4095	24.6
Ctrl MO CO	Clone- Clone	h3b5	15.184	2548.845	179.952	4095	24.6
Ctrl MO CO	Clone- Clone	h3b5	15.184	2379.308	175.498	4095	24.6
Ctrl MO CO	Clone- Clone	h3b5	15.184	1493.602	174.606	4095	24.6
Ctrl MO CO	Clone- Clone	h3b5	15.184	958.781	171.379	4095	24.6
Ctrl MO CO	Clone- Clone	h3b5	15.184	477.638	101.582	3117.711	24.6
Ctrl MO CO	Clone- Clone
Ctrl MO CO	Clone- Clone	h3b6	8.267	1716.026	56.779	4095	13.355
Ctrl MO CO	Clone- Clone	h3b6	8.267	1772.852	56.989	4095	13.355
Ctrl MO CO	Clone- Clone	h3b6	8.267	1101.88	45.238	4095	13.355
Ctrl MO CO	Clone- Clone	h3b6	8.267	689.41	76.709	4095	13.355
Ctrl MO CO	Clone- Clone	h3b6	8.267	522.226	47.653	4095	13.355
Ctrl MO CO	Clone- Clone
Ctrl MO CO	Clone- Clone	h3b7	10.969	1313.472	98.21	4095	17.747
Ctrl MO CO	Clone- Clone	h3b7	10.969	1546.859	65.754	4095	17.747
Ctrl MO CO	Clone- Clone	h3b7	10.969	1700.516	67.099	4095	17.747
Ctrl MO CO	Clone- Clone	h3b7	10.969	1467.119	68.041	4095	17.747
Ctrl MO CO	Clone- Clone	h3b7	10.969	662.18	86.119	3590.871	17.747
Ctrl MO CO	Clone- Clone	h3b7	10.969	369.773	30.215	2672.804	17.747
Ctrl MO CO	Clone- Clone	h3b7	10.969	273.403	16.814	2142.398	17.747
Ctrl MO CO	Clone- Clone
Ctrl MO CO	Clone- Clone	h3b8	6.97	1270.036	235.379	4095	11.246
Ctrl MO CO	Clone- Clone	h3b8	6.97	1385.984	240.22	4095	11.246
Ctrl MO CO	Clone- Clone	h3b8	6.97	1424.193	161.205	4095	11.246
Ctrl MO CO	Clone- Clone	h3b8	6.97	956.882	122.845	3706.587	11.246
Ctrl MO CO	Clone- Clone	h3b8	6.97	515.119	93.628	1524.988	11.246
Ctrl MO CO	Clone- Clone	h3b8	6.97	379.872	83.921	1650.104	11.246
Ctrl MO CO	Clone- Clone
Ctrl MO CO	Clone- Clone	h3b9	10.537	1941.315	69.347	4095	17.045
Ctrl MO CO	Clone- Clone	h3b9	10.537	1738.171	93.411	4095	17.045
Ctrl MO CO	Clone- Clone	h3b9	10.537	704.069	103.942	2352.488	17.045
Ctrl MO CO	Clone- Clone	h3b9	10.537	447.619	108.409	3650.713	17.045
Ctrl MO CO	Clone- Clone	h3b9	10.537	386.58	48.476	1977.077	17.045
Ctrl MO CO	Clone- Clone
Ctrl MO CO	Clone- Clone	h3b10	11.347	1244.916	88.555	4095	18.362
Ctrl MO CO	Clone- Clone	h3b10	11.347	1429.944	29.313	4095	18.362
Ctrl MO CO	Clone- Clone	h3b10	11.347	1133.831	118.06	4039.576	18.362
Ctrl MO CO	Clone- Clone	h3b10	11.347	751.779	105.857	3919.362	18.362
Ctrl MO CO	Clone- Clone	h3b10	11.347	625.109	95.785	4095	18.362
Ctrl MO CO	Clone- Clone
Ctrl MO CO	Clone- Clone	h3b11	9.294	1702.092	182.816	4095	15.024
Ctrl MO CO	Clone- Clone	h3b11	9.294	2080.644	176.948	4095	15.024
Ctrl MO CO	Clone- Clone	h3b11	9.294	1413.169	223.175	4087.169	15.024
Ctrl MO CO	Clone- Clone	h3b11	9.294	738.082	66.63	3797.2	15.024
Ctrl MO CO	Clone- Clone	h3b11	9.294	503.683	73.288	3343.23	15.024
Ctrl MO CO	Clone- Clone	h4b1	7.673	2173.352	251.646	4095	12.388
Ctrl MO CO	Clone- Clone	h4b1	7.673	2157.912	393.389	4095	12.388
Ctrl MO CO	Clone- Clone	h4b1	7.673	1826.255	417.471	4095	12.388
Ctrl MO CO	Clone- Clone	h4b1	7.673	1446.455	262.759	4093.482	12.388
Ctrl MO CO	Clone- Clone	h4b1	7.673	939.968	135.951	3626.259	12.388
Ctrl MO CO	Clone- Clone	h4b1	7.673	521.669	61.623	4054.788	12.388
Ctrl MO CO	Clone- Clone
Ctrl MO CO	Clone- Clone	h4b2	10.375	1922.071	285.819	4095	16.778
Ctrl MO CO	Clone- Clone	h4b2	10.375	1696.941	309.56	4095	16.778
Ctrl MO CO	Clone- Clone	h4b2	10.375	1479.477	354.476	4095	16.778
Ctrl MO CO	Clone- Clone	h4b2	10.375	1224.086	245.475	4095	16.778
Ctrl MO CO	Clone- Clone	h4b2	10.375	998.99	114.982	4095	16.778
Ctrl MO CO	Clone- Clone	h4b2	10.375	872.396	23.148	4048.814	16.778
Ctrl MO CO	Clone- Clone	h4b2	10.375	741.416	7.713	4072.786	16.778
Ctrl MO CO	Clone- Clone
Ctrl MO CO	Clone- Clone	h4b3	8.321	2142.416	293.49	4095	13.442
Ctrl MO CO	Clone- Clone	h4b3	8.321	1893.568	294.573	4095	13.442
Ctrl MO CO	Clone- Clone	h4b3	8.321	1632.664	246.201	4095	13.442
Ctrl MO CO	Clone- Clone	h4b3	8.321	1469.84	138.865	4095	13.442
Ctrl MO CO	Clone- Clone	h4b3	8.321	1409.315	159.777	4095	13.442
Ctrl MO CO	Clone- Clone	h4b3	8.321	1237.349	147.255	4095	13.442
Ctrl MO CO	Clone- Clone	h4b3	8.321	937.717	102.751	4042.354	13.442
Ctrl MO CO	Clone- Clone	h4b3	8.321	732.836	60.061	3950.608	13.442
Ctrl MO CO	Clone- Clone
Ctrl MO CO	Clone- Clone	h4b4	9.078	1568.493	208.389	4095	14.672
Ctrl MO CO	Clone- Clone	h4b4	9.078	1668.943	223.895	4095	14.672
Ctrl MO CO	Clone- Clone	h4b4	9.078	1771.273	185.49	4095	14.672
Ctrl MO CO	Clone- Clone	h4b4	9.078	1794.238	172.075	4095	14.672
Ctrl MO CO	Clone- Clone	h4b4	9.078	1700.89	159.61	4095	14.672
Ctrl MO CO	Clone- Clone	h4b4	9.078	1278.623	107.453	4095	14.672
Ctrl MO CO	Clone- Clone	h4b4	9.078	979.132	101.475	4070.454	14.672
Ctrl MO CO	Clone- Clone
Ctrl MO CO	Clone- Clone	h4b5	5.079	1665.801	200.618	4095	8.171
Ctrl MO CO	Clone- Clone	h4b5	5.079	1446.817	301.118	4095	8.171
Ctrl MO CO	Clone- Clone	h4b5	5.079	1159.728	193.288	4095	8.171
Ctrl MO CO	Clone- Clone	h4b5	5.079	942.761	105.084	4095	8.171
Ctrl MO CO	Clone- Clone	h4b5	5.079	755.699	62.283	4095	8.171
Ctrl MO CO	Clone- Clone	h4b5	5.079	482.11	18.731	4095	8.171
Ctrl MO CO	Clone- Clone
Ctrl MO CO	Clone- Clone	h4b6	10.699	2187.955	395.02	4095	17.301
Ctrl MO CO	Clone- Clone	h4b6	10.699	2110.318	363.208	4095	17.301
Ctrl MO CO	Clone- Clone	h4b6	10.699	1472.242	280.223	4095	17.301
Ctrl MO CO	Clone- Clone	h4b6	10.699	708.077	117.083	3591.656	17.301
Ctrl MO CO	Clone- Clone	h4b6	10.699	488.312	53.723	2674.509	17.301
Ctrl MO CO	Clone- Clone	h4b6	10.699	318.219	36.009	1529.381	17.301
Ctrl MO CO	Clone- Clone
Ctrl MO CO	Clone- Clone	h4b7	8.267	2137.743	311.102	4095	13.355
Ctrl MO CO	Clone- Clone	h4b7	8.267	2130.872	482.357	4095	13.355
Ctrl MO CO	Clone- Clone	h4b7	8.267	1842.853	451.342	4095	13.355
Ctrl MO CO	Clone- Clone	h4b7	8.267	1460.995	359.726	4095	13.355
Ctrl MO CO	Clone- Clone	h4b7	8.267	979.414	170.284	4095	13.355
Ctrl MO CO	Clone- Clone	h4b7	8.267	596.032	87.721	4038.11	13.355
Ctrl MO CO	Clone- Clone	h4b7	8.267	436.166	47.907	3304.285	13.355
Ctrl MO CO	Clone- Clone
Ctrl MO CO	Clone- Clone	h4b8	10.753	2664.982	450.158	4095	17.395
Ctrl MO CO	Clone- Clone	h4b8	10.753	2663.56	309.584	4095	17.395
Ctrl MO CO	Clone- Clone	h4b8	10.753	2567.257	220.165	4095	17.395
Ctrl MO CO	Clone- Clone	h4b8	10.753	1738.25	216.907	4095	17.395
Ctrl MO CO	Clone- Clone	h4b8	10.753	710.33	120.902	4095	17.395
Ctrl MO CO	Clone- Clone	h4b8	10.753	420.647	57.477	1841.03	17.395
Ctrl MO CO	Clone- Clone
Ctrl MO CO	Clone- Clone	h4b9	8.321	2143.166	319.513	4095	13.442
Ctrl MO CO	Clone- Clone	h4b9	8.321	2212.572	337.948	4095	13.442
Ctrl MO CO	Clone- Clone	h4b9	8.321	1693.357	299.903	4095	13.442
Ctrl MO CO	Clone- Clone	h4b9	8.321	945.823	215.445	3643.477	13.442
Ctrl MO CO	Clone- Clone	h4b9	8.321	477.557	53.157	2640.51	13.442
Ctrl MO CO	Clone- Clone	h4b9	8.321	373.883	50.061	2941.442	13.442
Ctrl MO CO	Clone- Clone
Ctrl MO CO	Clone- Clone	h4b10	8.159	1935.249	216.262	4095	13.179
Ctrl MO CO	Clone- Clone	h4b10	8.159	1538.001	146.335	4095	13.179
Ctrl MO CO	Clone- Clone	h4b10	8.159	816.6	105.48	3605.112	13.179
Ctrl MO CO	Clone- Clone	h4b10	8.159	589.44	96.572	2648.92	13.179
Ctrl MO CO	Clone- Clone	h4b10	8.159	409.61	45.619	3294.64	13.179
Ctrl MO CO	Clone- Clone
Ctrl MO CO	Clone- Clone	h4b11	7.349	2762.214	650.212	4095	11.861
Ctrl MO CO	Clone- Clone	h4b11	7.349	2523.309	619.261	4095	11.861
Ctrl MO CO	Clone- Clone	h4b11	7.349	2051.489	550.11	4095	11.861
Ctrl MO CO	Clone- Clone	h4b11	7.349	1367.471	352.221	4095	11.861
Ctrl MO CO	Clone- Clone	h4b11	7.349	910.733	226.742	4095	11.861
Ctrl MO CO	Clone- Clone	h4b11	7.349	700.72	182.606	4071.244	11.861
Ctrl MO CO	Clone- Clone
Ctrl MO CO	Clone- Clone	h4b12	5.782	1455.231	91.586	4095	9.313
Ctrl MO CO	Clone- Clone	h4b12	5.782	1057.233	124.456	3284.548	9.313
Ctrl MO CO	Clone- Clone	h4b12	5.782	653.868	93.092	2261.167	9.313
Ctrl MO CO	Clone- Clone	h4b12	5.782	514.614	57.547	2310.543	9.313
Ctrl MO CO	Clone- Clone	h4b12	5.782	443.235	67.667	2476.053	9.313
Ctrl MO PO	Non Clone- Clone	h1b1	8.645	1331.593	126.594	4095	13.97
Ctrl MO PO	Non Clone- Clone	h1b1	8.645	1390.935	166.071	4095	13.97
Ctrl MO PO	Non Clone- Clone	h1b1	8.645	1434.257	281.621	4095	13.97
Ctrl MO PO	Non Clone- Clone	h1b1	8.645	1373.814	298.076	4095	13.97
Ctrl MO PO	Non Clone- Clone	h1b1	8.645	1254.462	263.637	4095	13.97
Ctrl MO PO	Non Clone- Clone
Ctrl MO PO	Non Clone- Clone	h1b2	5.457	1632.421	245.106	4095	8.768
Ctrl MO PO	Non Clone- Clone	h1b2	5.457	1811.505	318.056	4095	8.768
Ctrl MO PO	Non Clone- Clone	h1b2	5.457	1888.663	361.499	4095	8.768
Ctrl MO PO	Non Clone- Clone	h1b2	5.457	1717.858	270.071	4087.592	8.768
Ctrl MO PO	Non Clone- Clone	h1b2	11.023	1772.195	352.697	4095	17.835
Ctrl MO PO	Non Clone- Clone	h1b2	11.023	1287.179	166.67	4095	17.835
Ctrl MO PO	Non Clone- Clone	h1b2	11.023	983.422	119.928	4095	17.835
Ctrl MO PO	Non Clone- Clone	h1b2	11.023	773.065	86.501	4095	17.835
Ctrl MO PO	Non Clone- Clone
Ctrl MO PO	Non Clone- Clone	h1b3	11.185	2131.066	204.401	4095	18.036
Ctrl MO PO	Non Clone- Clone	h1b3	11.185	1769.123	192.874	4095	18.036
Ctrl MO PO	Non Clone- Clone	h1b3	11.185	860.998	183.301	3174.369	18.036
Ctrl MO PO	Non Clone- Clone	h1b3	11.185	696.639	98.767	4095	18.036
Ctrl MO PO	Non Clone- Clone	h1b3	11.185	642.528	138.87	4095	18.036
Ctrl MO PO	Non Clone- Clone	h1b3	11.185	600.38	71.4	4095	18.036
Ctrl MO PO	Non Clone- Clone
Ctrl MO PO	Non Clone- Clone	h1b4	9.24	1668.014	161.616	4095	14.936
Ctrl MO PO	Non Clone- Clone	h1b4	9.24	1392.373	160.54	4095	14.936
Ctrl MO PO	Non Clone- Clone	h1b4	9.24	916.437	59.068	4034.531	14.936
Ctrl MO PO	Non Clone- Clone	h1b4	9.24	695.353	42.702	3655.803	14.936
Ctrl MO PO	Non Clone- Clone	h1b4	9.24	525.024	32.208	2952.522	14.936
Ctrl MO PO	Non Clone- Clone
Ctrl MO PO	Non Clone- Clone
Ctrl MO PO	Non Clone- Clone	h1b5	8.862	1390.27	141.789	4095	14.321
Ctrl MO PO	Non Clone- Clone	h1b5	8.862	1178.904	172.552	4087.149	14.321
Ctrl MO PO	Non Clone- Clone	h1b5	8.862	663.424	91.974	3997.18	14.321
Ctrl MO PO	Non Clone- Clone	h1b5	8.862	533.263	61.523	3857.683	14.321
Ctrl MO PO	Non Clone- Clone	h1b5	8.862	393.888	20.541	4022.425	14.321
Ctrl MO PO	Non Clone- Clone	h1b5	8.862	234.656	10.209	1359.128	14.321
Ctrl MO PO	Non Clone- Clone
Ctrl MO PO	Non Clone- Clone	h1b6	10.375	1580.761	129.07	4095	16.781
Ctrl MO PO	Non Clone- Clone	h1b6	10.375	1249.345	90.652	4095	16.781
Ctrl MO PO	Non Clone- Clone	h1b6	10.375	946.314	66.868	4095	16.781
Ctrl MO PO	Non Clone- Clone	h1b6	10.375	645.929	64.169	4095	16.781
Ctrl MO PO	Non Clone- Clone	h1b6	10.375	413.01	17.479	3929.375	16.781
Ctrl MO PO	Non Clone- Clone
Ctrl MO PO	Non Clone- Clone	h1b7	5.133	1870.089	408.82	4095	8.259
Ctrl MO PO	Non Clone- Clone	h1b7	5.133	1894.144	299.406	4095	8.259
Ctrl MO PO	Non Clone- Clone	h1b7	5.133	1030.49	212.513	3236.4	8.259
Ctrl MO PO	Non Clone- Clone	h1b7	5.133	763.466	105.629	2080.999	8.259
Ctrl MO PO	Non Clone- Clone	h1b7	5.133	535.766	69.336	1792.408	8.259
Ctrl MO PO	Non Clone- Clone	h1b7	5.133	281.953	46.988	1186.381	8.259
Ctrl MO PO	Non Clone- Clone
Ctrl MO PO	Non Clone- Clone	h1b8	9.186	1513.49	163.235	4095	14.848
Ctrl MO PO	Non Clone- Clone	h1b8	9.186	1300.746	171.901	4095	14.848
Ctrl MO PO	Non Clone- Clone	h1b8	9.186	1054.311	200.383	4095	14.848
Ctrl MO PO	Non Clone- Clone	h1b8	9.186	844.301	100.334	4095	14.848
Ctrl MO PO	Non Clone- Clone	h1b8	9.186	702.201	97.363	4059.171	14.848
Ctrl MO PO	Non Clone- Clone	h1b8	9.186	492.949	73.094	1926.047	14.848
Ctrl MO PO	Non Clone- Clone
Ctrl MO PO	Non Clone- Clone	h1b9	8.591	1796.872	179.524	4095	13.882
Ctrl MO PO	Non Clone- Clone	h1b9	8.591	1556.218	216.971	4095	13.882
Ctrl MO PO	Non Clone- Clone	h1b9	8.591	1085.486	150.768	4073.016	13.882
Ctrl MO PO	Non Clone- Clone	h1b9	8.591	721.555	109.02	3878.71	13.882
Ctrl MO PO	Non Clone- Clone	h1b9	8.591	619.992	83.606	4095	13.882
Ctrl MO PO	Non Clone- Clone	h1b9	8.591	495.84	52.751	4095	13.882
Ctrl MO PO	Non Clone- Clone	h2b1	7.349	2353.008	219.633	4095	11.861
Ctrl MO PO	Non Clone- Clone	h2b1	7.349	2140.525	200.455	4095	11.861
Ctrl MO PO	Non Clone- Clone	h2b1	7.349	1597.803	246.522	4086.875	11.861
Ctrl MO PO	Non Clone- Clone	h2b1	7.349	840.27	179.219	2423.231	11.861
Ctrl MO PO	Non Clone- Clone	h2b1	7.349	401.367	75.143	999.415	11.861
Ctrl MO PO	Non Clone- Clone
Ctrl MO PO	Non Clone- Clone	h2b2	11.779	1369.257	182.863	4095	19.065
Ctrl MO PO	Non Clone- Clone	h2b2	11.779	1335.652	183.233	4095	19.065
Ctrl MO PO	Non Clone- Clone	h2b2	11.779	1257.323	131.379	4095	19.065
Ctrl MO PO	Non Clone- Clone	h2b2	11.779	1107.239	142.647	4095	19.065
Ctrl MO PO	Non Clone- Clone	h2b2	11.779	890.004	60.98	4095	19.065
Ctrl MO PO	Non Clone- Clone
Ctrl MO PO	Non Clone- Clone	h2b3	11.563	2017.572	144.662	4095	18.714
Ctrl MO PO	Non Clone- Clone	h2b3	11.563	1975.67	271.089	4095	18.714
Ctrl MO PO	Non Clone- Clone	h2b3	11.563	1775.704	251.097	4095	18.714
Ctrl MO PO	Non Clone- Clone	h2b3	11.563	1632.097	260.433	4095	18.714
Ctrl MO PO	Non Clone- Clone	h2b3	11.563	1601.238	265.094	4095	18.714
Ctrl MO PO	Non Clone- Clone	h2b3	11.563	1677.448	167.227	4095	18.714
Ctrl MO PO	Non Clone- Clone	h2b3	11.563	1479.169	186.849	4095	18.714
Ctrl MO PO	Non Clone- Clone	h2b3	11.563	1141.16	101.666	4094.462	18.714
Ctrl MO PO	Non Clone- Clone	h2b3	11.563	732.441	66.061	3755.094	18.714
Ctrl MO PO	Non Clone- Clone	h3b1	7.457	1814.29	37.272	4095	12.037
Ctrl MO PO	Non Clone- Clone	h3b1	7.457	1718.095	96.352	4095	12.037
Ctrl MO PO	Non Clone- Clone	h3b1	7.457	1232.882	173.986	4095	12.037
Ctrl MO PO	Non Clone- Clone	h3b1	8.051	1710.175	102.028	4095	13.003
Ctrl MO PO	Non Clone- Clone	h3b1	8.051	1408.036	108.676	4095	13.003
Ctrl MO PO	Non Clone- Clone	h3b1	8.051	839.035	108.949	4095	13.003
Ctrl MO PO	Non Clone- Clone	h3b1	8.051	679.022	120.68	4095	13.003
Ctrl MO PO	Non Clone- Clone
Ctrl MO PO	Non Clone- Clone	h3b2	6.754	1414.171	219.283	4095	10.894
Ctrl MO PO	Non Clone- Clone	h3b2	6.754	1839.369	244.332	4095	10.894
Ctrl MO PO	Non Clone- Clone	h3b2	6.754	1208.993	135.268	4095	10.894
Ctrl MO PO	Non Clone- Clone	h3b2	6.754	499.135	31.033	1464.472	10.894
Ctrl MO PO	Non Clone- Clone	h3b2	6.754	324.951	79.612	776.531	10.894
Ctrl MO PO	Non Clone- Clone	h3b2	6.754	208.313	31.335	587.115	10.894
Ctrl MO PO	Non Clone- Clone
Ctrl MO PO	Non Clone- Clone	h3b3	8.267	2325.257	390.688	4095	13.355
Ctrl MO PO	Non Clone- Clone	h3b3	8.267	2037.178	191.434	4095	13.355
Ctrl MO PO	Non Clone- Clone	h3b3	8.267	1350.441	283.108	4095	13.355
Ctrl MO PO	Non Clone- Clone	h3b3	8.267	1065.933	218.031	3473.189	13.355
Ctrl MO PO	Non Clone- Clone	h3b3	8.267	903.291	87.948	3621.465	13.355
Ctrl MO PO	Non Clone- Clone
Ctrl MO PO	Non Clone- Clone	h3b4	11.617	1225.254	101.775	4095	18.802
Ctrl MO PO	Non Clone- Clone	h3b4	11.617	1405.791	66.575	4095	18.802
Ctrl MO PO	Non Clone- Clone	h3b4	11.617	1167.901	26.323	4095	18.802
Ctrl MO PO	Non Clone- Clone	h3b4	11.617	807.346	66.965	3178.082	18.802
Ctrl MO PO	Non Clone- Clone	h3b4	11.617	503.305	52.759	3006.279	18.802
Ctrl MO PO	Non Clone- Clone	h3b4	11.617	325.138	39.97	2390.484	18.802
Ctrl MO PO	Non Clone- Clone
Ctrl MO PO	Non Clone- Clone	h3b5	15.346	2629.291	331.564	4095	24.864
Ctrl MO PO	Non Clone- Clone	h3b5	15.346	2484.24	336.845	4095	24.864
Ctrl MO PO	Non Clone- Clone	h3b5	15.346	1538.711	264.897	4095	24.864
Ctrl MO PO	Non Clone- Clone	h3b5	15.346	967.275	247.09	4095	24.864
Ctrl MO PO	Non Clone- Clone	h3b5	15.346	473.889	108.305	3054.699	24.864
Ctrl MO PO	Non Clone- Clone	h3b5	15.346	211.66	37.312	1413.39	24.864
Ctrl MO PO	Non Clone- Clone	h4b1	7.241	2734.573	480.365	4095	11.685
Ctrl MO PO	Non Clone- Clone	h4b1	7.241	2056.139	284.897	4095	11.685
Ctrl MO PO	Non Clone- Clone	h4b1	7.241	1435.097	102.544	4095	11.685
Ctrl MO PO	Non Clone- Clone	h4b1	7.241	1085.68	74.757	4046.307	11.685
Ctrl MO PO	Non Clone- Clone	h4b1	7.241	715.955	31.385	2877.761	11.685
Ctrl MO PO	Non Clone- Clone	h4b1	7.241	532.1	36.197	3783.57	11.685
Ctrl MO PO	Non Clone- Clone	h4b1	7.241	317.631	22.025	1537.956	11.685
Ctrl MO PO	Non Clone- Clone
Ctrl MO PO	Non Clone- Clone	h4b2	5.187	2312.718	232.751	4095	8.347
Ctrl MO PO	Non Clone- Clone	h4b2	5.187	1833.972	194.443	4095	8.347
Ctrl MO PO	Non Clone- Clone	h4b2	5.187	1358.918	198.974	4085.975	8.347
Ctrl MO PO	Non Clone- Clone	h4b2	5.187	859.678	37.209	3835.946	8.347
Ctrl MO PO	Non Clone- Clone	h4b2	5.187	552.885	7.21	3090.95	8.347
Ctrl MO PO	Non Clone- Clone
Ctrl MO PO	Non Clone- Clone	h4b3	11.725	1962.446	281.152	4095	18.974
Ctrl MO PO	Non Clone- Clone	h4b3	11.725	1772.326	258.089	4095	18.974
Ctrl MO PO	Non Clone- Clone	h4b3	11.725	1175.201	67.982	4095	18.974
Ctrl MO PO	Non Clone- Clone	h4b3	11.725	951.357	93.555	4095	18.974
Ctrl MO PO	Non Clone- Clone	h4b3	11.725	691.902	54.776	2955.73	18.974
Ctrl MO PO	Non Clone- Clone	h4b3	11.725	459.287	48.69	3778.386	18.974
Ctrl MO PO	Non Clone- Clone	h4b3	11.725	261.788	18.848	2706.022	18.974
Ctrl MO PO	Non Clone- Clone
Ctrl MO PO	Non Clone- Clone	h4b4	10.05	1455.921	105.102	4095	16.254
Ctrl MO PO	Non Clone- Clone	h4b4	10.05	1300.027	116.847	4095	16.254
Ctrl MO PO	Non Clone- Clone	h4b4	10.05	831.703	44.991	4083.54	16.254
Ctrl MO PO	Non Clone- Clone	h4b4	10.05	670.229	24.254	4095	16.254
Ctrl MO PO	Non Clone- Clone	h4b4	10.05	581.779	19.402	4095	16.254
Ctrl MO PO	Non Clone- Clone	h4b4	10.05	555.28	2.751	4095	16.254
Ctrl MO PO	Non Clone- Clone	h4b4	10.05	388.05	2.096	4095	16.254
Ctrl MO PO	Non Clone- Clone
Ctrl MO PO	Non Clone- Clone	h4b5	8.267	978.937	135.916	4095	13.354
Ctrl MO PO	Non Clone- Clone	h4b5	8.267	1009.957	38.451	4095	13.354
Ctrl MO PO	Non Clone- Clone	h4b5	8.267	959.739	32.131	4095	13.354
Ctrl MO PO	Non Clone- Clone	h4b5	8.267	890.242	55.757	4095	13.354
Ctrl MO PO	Non Clone- Clone	h4b5	8.267	728.502	41.805	4058.408	13.354
Ctrl MO PO	Non Clone- Clone	h4b5	8.267	672.45	22.275	4095	13.354
Ctrl MO PO	Non Clone- Clone	h4b5	8.267	685.041	38.369	4095	13.354
Ctrl MO PO	Non Clone- Clone
Ctrl MO PO	Non Clone- Clone	h4b6	11.131	1552.054	188.277	4095	18.011
Ctrl MO PO	Non Clone- Clone	h4b6	11.131	1393.976	216.595	4095	18.011
Ctrl MO PO	Non Clone- Clone	h4b6	11.131	1219.616	165.913	4095	18.011
Ctrl MO PO	Non Clone- Clone	h4b6	11.131	1041.733	126.612	4095	18.011
Ctrl MO PO	Non Clone- Clone	h4b6	11.131	895.318	145.146	4095	18.011
Ctrl MO PO	Non Clone- Clone	h4b6	11.131	804.873	97.702	4095	18.011
Ctrl MO PO	Non Clone- Clone	h4b6	11.131	774.551	83.389	4084.914	18.011
Ctrl MO PO	Non Clone- Clone
Ctrl MO PO	Non Clone- Clone	h4b7	9.294	1957.224	146.062	4095	15.021
Ctrl MO PO	Non Clone- Clone	h4b7	9.294	2316.598	83.873	4095	15.021
Ctrl MO PO	Non Clone- Clone	h4b7	9.294	2203.865	113.094	4095	15.021
Ctrl MO PO	Non Clone- Clone	h4b7	9.294	1756.822	114.433	4095	15.021
Ctrl MO PO	Non Clone- Clone	h4b7	9.294	1445.026	79.497	4095	15.021
Ctrl MO PO	Non Clone- Clone	h4b7	9.294	905.887	37.307	3960.548	15.021
Ctrl MO PO	Non Clone- Clone	h4b7	9.294	606.437	38.858	3704.509	15.021
Ctrl MO PO	Non Clone- Clone	h4b7	9.294	349.916	23.485	2842.117	15.021
Ctrl MO NO	Non Clone- Non Clone	h2b1	12.86	1877.133	111.772	4095	20.822
Ctrl MO NO	Non Clone- Non Clone	h2b1	12.86	1593.821	199.025	4095	20.822
Ctrl MO NO	Non Clone- Non Clone	h2b1	12.86	1223.319	145.186	4095	20.822
Ctrl MO NO	Non Clone- Non Clone	h2b1	12.86	1003.529	98.342	4095	20.822
Ctrl MO NO	Non Clone- Non Clone	h2b1	12.86	768.602	66.173	4095	20.822
Ctrl MO NO	Non Clone- Non Clone
Ctrl MO NO	Non Clone- Non Clone	h2b2	14.481	2234.047	348.958	4095	23.458
Ctrl MO NO	Non Clone- Non Clone	h2b2	14.481	2056.255	178.847	4095	23.458
Ctrl MO NO	Non Clone- Non Clone	h2b2	14.481	1576.556	248.408	4095	23.458
Ctrl MO NO	Non Clone- Non Clone	h2b2	14.481	1137.317	154.14	4095	23.458
Ctrl MO NO	Non Clone- Non Clone	h2b2	14.481	685.66	70.387	4095	23.458
Ctrl MO NO	Non Clone- Non Clone	h2b2	14.481	378.226	37.824	2974.551	23.458
Ctrl MO NO	Non Clone- Non Clone
Ctrl MO NO	Non Clone- Non Clone	h2b3	9.834	2037.986	320.664	4095	15.902
Ctrl MO NO	Non Clone- Non Clone	h2b3	9.834	1584.307	400.659	4095	15.902
Ctrl MO NO	Non Clone- Non Clone	h2b3	9.834	1203.71	316.137	4095	15.902
Ctrl MO NO	Non Clone- Non Clone	h2b3	9.834	926.259	192.706	3035.943	15.902
Ctrl MO NO	Non Clone- Non Clone	h2b3	9.834	630.072	139.858	3134.923	15.902
Ctrl MO NO	Non Clone- Non Clone	h2b3	9.834	358.874	68.4	3661.208	15.902
Ctrl MO NO	Non Clone- Non Clone
Ctrl MO NO	Non Clone- Non Clone	h2b4	10.969	2150.286	329.506	4095	17.747
Ctrl MO NO	Non Clone- Non Clone	h2b4	10.969	2452.445	157.79	4095	17.747
Ctrl MO NO	Non Clone- Non Clone	h2b4	10.969	2198.925	187.723	4095	17.747
Ctrl MO NO	Non Clone- Non Clone	h2b4	10.969	1776.277	255.336	4095	17.747
Ctrl MO NO	Non Clone- Non Clone	h2b4	10.969	1116.632	133.064	4072.284	17.747
Ctrl MO NO	Non Clone- Non Clone	h2b4	10.969	517.8	50.078	1972.985	17.747
Ctrl MO NO	Non Clone- Non Clone	h2b4	10.969	274.388	10.528	1219.643	17.747
Ctrl MO NO	Non Clone- Non Clone	h2b4	10.969	228.858	18.222	1059.036	17.747
Ctrl MO NO	Non Clone- Non Clone
Ctrl MO NO	Non Clone- Non Clone	h2b5	6.376	1836.949	385.653	4095	10.279
Ctrl MO NO	Non Clone- Non Clone	h2b5	6.376	1229.85	331.673	3735.16	10.279
Ctrl MO NO	Non Clone- Non Clone	h2b5	6.376	922.042	150.147	3963.467	10.279
Ctrl MO NO	Non Clone- Non Clone	h2b5	6.376	709.15	150.157	4095	10.279
Ctrl MO NO	Non Clone- Non Clone	h2b5	6.376	285.469	39.933	2184.124	10.279
Ctrl MO NO	Non Clone- Non Clone	h3b1	11.131	1078.314	91.53	4095	18.011
Ctrl MO NO	Non Clone- Non Clone	h3b1	11.131	1117.972	66.088	4095	18.011
Ctrl MO NO	Non Clone- Non Clone	h3b1	11.131	909.155	73.256	4095	18.011
Ctrl MO NO	Non Clone- Non Clone	h3b1	11.131	540.292	38.587	3939.205	18.011
Ctrl MO NO	Non Clone- Non Clone	h3b1	11.131	381.488	31.74	4095	18.011
Ctrl MO NO	Non Clone- Non Clone	h3b1	11.131	237.501	26.304	2150.849	18.011
Ctrl MO NO	Non Clone- Non Clone
Ctrl MO NO	Non Clone- Non Clone	h3b2	9.672	1767.783	33.428	4095	15.639
Ctrl MO NO	Non Clone- Non Clone	h3b2	9.672	1162.006	76.398	3587.589	15.639
Ctrl MO NO	Non Clone- Non Clone	h3b2	9.672	622.741	112.118	1605.337	15.639
Ctrl MO NO	Non Clone- Non Clone	h3b2	9.672	312.211	53.929	1275.682	15.639
Ctrl MO NO	Non Clone- Non Clone
Ctrl MO NO	Non Clone- Non Clone	h3b3	13.184	1612.03	55.184	4095	21.347
Ctrl MO NO	Non Clone- Non Clone	h3b3	13.184	1165.7	102.479	3944.751	21.347
Ctrl MO NO	Non Clone- Non Clone	h3b3	13.184	755.116	110.724	3133.774	21.347
Ctrl MO NO	Non Clone- Non Clone	h3b3	13.184	424.982	68.418	2139.222	21.347
Ctrl MO NO	Non Clone- Non Clone	h3b3	13.184	216.733	20.416	1414.436	21.347
Ctrl MO NO	Non Clone- Non Clone
Ctrl MO NO	Non Clone- Non Clone	h3b4	6.754	1349.173	115.99	4095	10.894
Ctrl MO NO	Non Clone- Non Clone	h3b4	6.754	1388.77	83.682	4095	10.894
Ctrl MO NO	Non Clone- Non Clone	h3b4	6.754	1142.779	92.46	4095	10.894
Ctrl MO NO	Non Clone- Non Clone	h3b4	6.754	622.44	113.065	3223.553	10.894
Ctrl MO NO	Non Clone- Non Clone
Ctrl MO NO	Non Clone- Non Clone	h3b5	9.78	1983.757	86.09	4095	15.815
Ctrl MO NO	Non Clone- Non Clone	h3b5	9.78	1900.207	181.104	4095	15.815
Ctrl MO NO	Non Clone- Non Clone	h3b5	9.78	1654.66	320.337	4095	15.815
Ctrl MO NO	Non Clone- Non Clone	h3b5	9.78	1319.101	145.676	4095	15.815
Ctrl MO NO	Non Clone- Non Clone	h3b5	9.78	919.114	89.366	3875.552	15.815
Ctrl MO NO	Non Clone- Non Clone	h3b5	9.78	756.054	82.979	2955.049	15.815
Ctrl MO NO	Non Clone- Non Clone
Ctrl MO NO	Non Clone- Non Clone	h3b6	4.161	1795.817	221.784	4095	6.677
Ctrl MO NO	Non Clone- Non Clone	h3b6	4.161	1508.15	179.554	4033.198	6.677
Ctrl MO NO	Non Clone- Non Clone	h3b6	4.161	1070.949	335.042	4095	6.677
Ctrl MO NO	Non Clone- Non Clone	h3b6	4.161	734.418	207.337	4095	6.677
Ctrl MO NO	Non Clone- Non Clone	h3b6	4.161	406.431	61.92	1955.508	6.677
Ctrl MO NO	Non Clone- Non Clone	h4b1	11.725	1920.629	310.241	4095	18.977
Ctrl MO NO	Non Clone- Non Clone	h4b1	11.725	2042.565	239.514	4095	18.977
Ctrl MO NO	Non Clone- Non Clone	h4b1	11.725	1951.783	137.069	4095	18.977
Ctrl MO NO	Non Clone- Non Clone	h4b1	11.725	1595.648	105.32	4095	18.977
Ctrl MO NO	Non Clone- Non Clone	h4b1	11.725	1017.863	49.851	4095	18.977
Ctrl MO NO	Non Clone- Non Clone	h4b1	11.725	726.918	46.434	4083.232	18.977
Ctrl MO NO	Non Clone- Non Clone	h4b1	11.725	481.806	20.926	3551.904	18.977
Ctrl MO NO	Non Clone- Non Clone
Ctrl MO NO	Non Clone- Non Clone	h4b2	9.078	2227.197	247.468	4095	14.672
Ctrl MO NO	Non Clone- Non Clone	h4b2	9.078	2140.998	279.712	4095	14.672
Ctrl MO NO	Non Clone- Non Clone	h4b2	9.078	2000.572	255.334	4095	14.672
Ctrl MO NO	Non Clone- Non Clone	h4b2	9.078	1794.264	83.174	4095	14.672
Ctrl MO NO	Non Clone- Non Clone	h4b2	9.078	1485.441	67.148	4095	14.672
Ctrl MO NO	Non Clone- Non Clone	h4b2	9.078	1275.866	31.299	4095	14.672
Ctrl MO NO	Non Clone- Non Clone	h4b2	9.078	976.676	22.525	4095	14.672
Ctrl MO NO	Non Clone- Non Clone
Ctrl MO NO	Non Clone- Non Clone	h4b3	8.97	1559.163	190.346	4095	14.497
Ctrl MO NO	Non Clone- Non Clone	h4b3	8.97	1535.183	217.908	4095	14.497
Ctrl MO NO	Non Clone- Non Clone	h4b3	8.97	1554.519	248.913	4095	14.497
Ctrl MO NO	Non Clone- Non Clone	h4b3	8.97	1587.307	217.028	4095	14.497
Ctrl MO NO	Non Clone- Non Clone	h4b3	8.97	1469.499	231.28	4095	14.497
Ctrl MO NO	Non Clone- Non Clone	h4b3	8.97	1007.67	69.799	4095	14.497
Ctrl MO NO	Non Clone- Non Clone	h4b3	8.97	774.135	97.409	4095	14.497
Ctrl MO NO	Non Clone- Non Clone
Ctrl MO NO	Non Clone- Non Clone	h4b4	10.861	1746.404	82.673	4095	17.571
Ctrl MO NO	Non Clone- Non Clone	h4b4	10.861	1367.616	49.386	4095	17.571
Ctrl MO NO	Non Clone- Non Clone	h4b4	10.861	912.41	48.11	4095	17.571
Ctrl MO NO	Non Clone- Non Clone	h4b4	10.861	742.785	71.929	4095	17.571
Ctrl MO NO	Non Clone- Non Clone	h4b4	10.861	622.984	42.419	4095	17.571
Ctrl MO NO	Non Clone- Non Clone	h4b4	10.861	511.555	32.483	4078.477	17.571
Ctrl MO NO	Non Clone- Non Clone	h4b4	10.861	479.963	17.749	4083.446	17.571
Ctrl MO NO	Non Clone- Non Clone
Ctrl MO NO	Non Clone- Non Clone	h4b5	6.322	2405.37	342.185	4095	10.192
Ctrl MO NO	Non Clone- Non Clone	h4b5	6.322	2299.96	229.214	4095	10.192
Ctrl MO NO	Non Clone- Non Clone	h4b5	6.322	1633.157	173.876	4095	10.192
Ctrl MO NO	Non Clone- Non Clone	h4b5	6.322	811.906	41.668	4067.906	10.192
Ctrl MO NO	Non Clone- Non Clone	h4b5	6.322	511.414	55.745	2404.846	10.192
Ctrl MO NO	Non Clone- Non Clone	h4b5	6.322	336.225	42.181	1829.729	10.192
Ctrl MO NO	Non Clone- Non Clone
Ctrl MO NO	Non Clone- Non Clone	h4b6	6.484	2529.121	267.439	4095	10.455
Ctrl MO NO	Non Clone- Non Clone	h4b6	6.484	2968.513	332.956	4095	10.455
Ctrl MO NO	Non Clone- Non Clone	h4b6	6.484	2433.249	425.942	4095	10.455
Ctrl MO NO	Non Clone- Non Clone	h4b6	6.484	1801.176	376.991	4095	10.455
Ctrl MO NO	Non Clone- Non Clone	h4b6	6.484	1075.223	225.093	4011.244	10.455
Ctrl MO NO	Non Clone- Non Clone	h4b6	6.484	630.625	109.547	3036.54	10.455
Ctrl MO NO	Non Clone- Non Clone	h4b6	6.484	288.514	37.921	1126.3	10.455
Ctrl MO NO	Non Clone- Non Clone	h4b6	6.484	195.164	7.536	681.803	10.455
Ecad MO CO	Clone- Clone	h1b1	13.022	1591.528	176.25	4095	21.086
Ecad MO CO	Clone- Clone	h1b1	13.022	1779.459	278.083	4095	21.086
Ecad MO CO	Clone- Clone	h1b1	13.022	1531.05	149.87	4095	21.086
Ecad MO CO	Clone- Clone	h1b1	13.022	618.782	66.806	1877.036	21.086
Ecad MO CO	Clone- Clone	h1b1	13.022	381.11	30.436	1792.167	21.086
Ecad MO CO	Clone- Clone
Ecad MO CO	Clone- Clone
Ecad MO CO	Clone- Clone	h1b2	5.187	1994.56	168.676	4095	8.347
Ecad MO CO	Clone- Clone	h1b2	5.187	1962.732	74.962	4095	8.347
Ecad MO CO	Clone- Clone	h1b2	5.187	1503.821	76.869	4095	8.347
Ecad MO CO	Clone- Clone	h1b2	5.187	771.254	140.668	3868.306	8.347
Ecad MO CO	Clone- Clone	h1b2	5.187	335.572	66.536	1354.274	8.347
Ecad MO CO	Clone- Clone
Ecad MO CO	Clone- Clone	h1b3	9.888	1610.605	123.024	4095	15.99
Ecad MO CO	Clone- Clone	h1b3	9.888	1349.171	124.413	4095	15.99
Ecad MO CO	Clone- Clone	h1b3	9.888	927.66	84.222	3907.961	15.99
Ecad MO CO	Clone- Clone	h1b3	9.888	716.229	79.486	3922.19	15.99
Ecad MO CO	Clone- Clone
Ecad MO CO	Clone- Clone	h1b4	18.966	1393.17	93.985	4095	30.749
Ecad MO CO	Clone- Clone	h1b4	18.966	1124.808	140.281	4095	30.749
Ecad MO CO	Clone- Clone	h1b4	18.966	609.914	49.217	4094.699	30.749
Ecad MO CO	Clone- Clone	h1b4	18.966	397.695	19.075	3772.535	30.749
Ecad MO CO	Clone- Clone	h1b4	18.966	341.602	27.38	3471.296	30.749
Ecad MO CO	Clone- Clone
Ecad MO CO	Clone- Clone	h1b5	12.374	1779.76	227.161	4095	20.031
Ecad MO CO	Clone- Clone	h1b5	12.374	2124.206	216.495	4095	20.031
Ecad MO CO	Clone- Clone	h1b5	12.374	2200.6	171.03	4095	20.031
Ecad MO CO	Clone- Clone	h1b5	12.374	1674.649	163.533	4095	20.031
Ecad MO CO	Clone- Clone	h1b5	12.374	1007.856	127.022	4095	20.031
Ecad MO CO	Clone- Clone	h1b5	12.374	683.274	55.566	4084.858	20.031
Ecad MO CO	Clone- Clone
Ecad MO CO	Clone- Clone	h1b6	8.754	1912.726	120.939	4095	14.145
Ecad MO CO	Clone- Clone	h1b6	8.754	2124.109	139.551	4095	14.145
Ecad MO CO	Clone- Clone	h1b6	8.754	2001.558	209.98	4095	14.145
Ecad MO CO	Clone- Clone	h1b6	8.754	1690.537	212.816	4095	14.145
Ecad MO CO	Clone- Clone	h1b6	8.754	995.463	134.659	3977.456	14.145
Ecad MO CO	Clone- Clone
Ecad MO CO	Clone- Clone	h1b7	8.321	1542.282	223.687	4095	13.442
Ecad MO CO	Clone- Clone	h1b7	8.321	1543.578	132.285	4095	13.442
Ecad MO CO	Clone- Clone	h1b7	8.321	1011.749	111.065	3460.063	13.442
Ecad MO CO	Clone- Clone	h1b7	8.321	553.451	114.068	3134.036	13.442
Ecad MO CO	Clone- Clone	h1b7	8.321	355.39	99.081	1578.396	13.442
Ecad MO CO	Clone- Clone	h1b7	8.321	268.317	15.228	2356.074	13.442
Ecad MO CO	Clone- Clone
Ecad MO CO	Clone- Clone	h1b8	10.158	1909.068	119.549	4095	16.427
Ecad MO CO	Clone- Clone	h1b8	10.158	1775.988	148.6	4095	16.427
Ecad MO CO	Clone- Clone	h1b8	10.158	1534.592	104.101	4095	16.427
Ecad MO CO	Clone- Clone	h1b8	10.158	1174.806	59.017	4095	16.427
Ecad MO CO	Clone- Clone	h1b8	10.158	758.9	99.487	4095	16.427
Ecad MO CO	Clone- Clone	h1b8	10.158	626.484	52.07	4095	16.427
Ecad MO CO	Clone- Clone
Ecad MO CO	Clone- Clone	h1b9	10.321	1008.047	47.264	4095	16.693
Ecad MO CO	Clone- Clone	h1b9	10.321	1611.742	34.524	4095	16.693
Ecad MO CO	Clone- Clone	h1b9	10.321	1749.028	67.796	4095	16.693
Ecad MO CO	Clone- Clone	h1b9	10.321	1522.787	31.817	4095	16.693
Ecad MO CO	Clone- Clone	h1b9	10.321	882.185	51.749	4095	16.693
Ecad MO CO	Clone- Clone	h1b9	10.321	450.584	43.721	2583.266	16.693
Ecad MO CO	Clone- Clone	h1b9	10.321	360.742	34.294	1751.962	16.693
Ecad MO CO	Clone- Clone	h2b1	9.51	321.214	11.553	3605.232	15.375
Ecad MO CO	Clone- Clone	h2b1	9.51	320.757	14.498	1727.92	15.375
Ecad MO CO	Clone- Clone	h2b1	9.51	295.47	10.74	1824.625	15.375
Ecad MO CO	Clone- Clone	h2b1	9.51	231.682	8.204	1290.024	15.375
Ecad MO CO	Clone- Clone	h2b1	9.51	219.537	7.89	1201.495	15.375
Ecad MO CO	Clone- Clone	h2b1	9.51	223.331	4.484	1173.885	15.375
Ecad MO CO	Clone- Clone
Ecad MO CO	Clone- Clone	h2b2	10.699	434.555	13.102	4095	17.308
Ecad MO CO	Clone- Clone	h2b2	10.699	512.237	14.417	4095	17.308
Ecad MO CO	Clone- Clone	h2b2	10.699	517.047	12.957	4095	17.308
Ecad MO CO	Clone- Clone	h2b2	10.699	369.388	9.766	2790.861	17.308
Ecad MO CO	Clone- Clone	h2b2	10.699	327.445	21.169	2991.136	17.308
Ecad MO CO	Clone- Clone	h2b2	10.699	261.069	6.446	1802.311	17.308
Ecad MO CO	Clone- Clone	h2b2	10.699	206.461	8.261	1660.823	17.308
Ecad MO CO	Clone- Clone
Ecad MO CO	Clone- Clone	h2b3	10.429	232.629	12.385	1858.519	16.867
Ecad MO CO	Clone- Clone	h2b3	10.429	262.306	3.099	3976.396	16.867
Ecad MO CO	Clone- Clone	h2b3	10.429	206.339	6.191	1115.841	16.867
Ecad MO CO	Clone- Clone	h2b3	10.429	206.315	10.78	1832.748	16.867
Ecad MO CO	Clone- Clone	h2b3	10.429	231.828	5.341	3075.738	16.867
Ecad MO CO	Clone- Clone	h2b3	10.429	248.582	7.56	2399.431	16.867
Ecad MO CO	Clone- Clone	h2b3	10.429	227.803	4.44	1578.469	16.867
Ecad MO CO	Clone- Clone
Ecad MO CO	Clone- Clone	h2b4	10.158	436.577	7.746	4095	16.429
Ecad MO CO	Clone- Clone	h2b4	10.158	406.45	2.08	3519.194	16.429
Ecad MO CO	Clone- Clone	h2b4	10.158	371.604	9.843	3293.182	16.429
Ecad MO CO	Clone- Clone	h2b4	10.158	335.642	6.543	1991.111	16.429
Ecad MO CO	Clone- Clone	h2b4	10.158	253.22	6.732	2460.495	16.429
Ecad MO CO	Clone- Clone	h2b4	10.158	214.423	3.095	1131.656	16.429
Ecad MO CO	Clone- Clone	h2b4	10.158	198.622	0	1206.087	16.429
Ecad MO CO	Clone- Clone
Ecad MO CO	Clone- Clone	h2b5	16.048	762.106	54.942	4095	26.006
Ecad MO CO	Clone- Clone	h2b5	16.048	802.972	52.31	4095	26.006
Ecad MO CO	Clone- Clone	h2b5	16.048	737.299	52.938	4095	26.006
Ecad MO CO	Clone- Clone	h2b5	16.048	550.488	36.507	3209.802	26.006
Ecad MO CO	Clone- Clone	h2b5	16.048	443.687	11.304	4095	26.006
Ecad MO CO	Clone- Clone	h2b5	16.048	403.282	9.251	3875.926	26.006
Ecad MO CO	Clone- Clone	h2b5	16.048	346.777	2.151	3909.723	26.006
Ecad MO CO	Clone- Clone	h2b5	16.048	275.637	1.881	3248.291	26.006
Ecad MO CO	Clone- Clone	h2b5	16.048	210.762	0.004	3511.366	26.006
Ecad MO CO	Clone- Clone
Ecad MO CO	Clone- Clone	h2b6	14.643	764.178	32.958	4095	23.721
Ecad MO CO	Clone- Clone	h2b6	14.643	779.583	14.039	4095	23.721
Ecad MO CO	Clone- Clone	h2b6	14.643	720.493	25.768	4095	23.721
Ecad MO CO	Clone- Clone	h2b6	14.643	612.405	32.606	4095	23.721
Ecad MO CO	Clone- Clone	h2b6	14.643	513.932	32.394	3374.065	23.721
Ecad MO CO	Clone- Clone	h2b6	14.643	410.162	14.408	3344.186	23.721
Ecad MO CO	Clone- Clone
Ecad MO CO	Clone- Clone	h2b7	8.267	567.797	5.318	4095	13.35
Ecad MO CO	Clone- Clone	h2b7	8.267	555.097	24.23	4095	13.35
Ecad MO CO	Clone- Clone	h2b7	8.267	423.017	20.41	4069.519	13.35
Ecad MO CO	Clone- Clone	h2b7	8.267	336.566	29.988	2539.732	13.35
Ecad MO CO	Clone- Clone	h2b7	8.267	330.066	17.94	2683.461	13.35
Ecad MO CO	Clone- Clone	h2b7	8.267	367.717	28.821	4077.646	13.35
Ecad MO CO	Clone- Clone
Ecad MO CO	Clone- Clone	h2b8	12.158	382.771	19.288	4095	19.68
Ecad MO CO	Clone- Clone	h2b8	12.158	392.632	14.662	4095	19.68
Ecad MO CO	Clone- Clone	h2b8	12.158	433.972	7.291	4095	19.68
Ecad MO CO	Clone- Clone	h2b8	12.158	412.087	9.258	4095	19.68
Ecad MO CO	Clone- Clone	h2b8	12.158	397.153	8.711	4095	19.68
Ecad MO CO	Clone- Clone	h2b8	12.158	325.054	14.167	1962.696	19.68
Ecad MO CO	Clone- Clone	h2b8	12.158	277.245	11.102	1786.528	19.68
Ecad MO CO	Clone- Clone
Ecad MO CO	Clone- Clone	h2b9	7.457	591.943	62.559	4095	12.037
Ecad MO CO	Clone- Clone	h2b9	7.457	458.464	41.167	4074.844	12.037
Ecad MO CO	Clone- Clone	h2b9	7.457	363.219	21.718	2645.933	12.037
Ecad MO CO	Clone- Clone	h2b9	7.457	251.509	11.576	964.836	12.037
Ecad MO CO	Clone- Clone	h2b9	7.457	241.848	6.495	2123.131	12.037
Ecad MO CO	Clone- Clone	h2b9	7.457	319.342	15.941	4095	12.037
Ecad MO CO	Clone- Clone
Ecad MO CO	Clone- Clone	h2b10	8.591	179.34	7.431	1927.872	13.882
Ecad MO CO	Clone- Clone	h2b10	8.591	195.329	3.039	1180.116	13.882
Ecad MO CO	Clone- Clone	h2b10	8.591	227.872	5.391	2499.595	13.882
Ecad MO CO	Clone- Clone	h2b10	8.591	226.939	2.206	2467.765	13.882
Ecad MO CO	Clone- Clone	h2b10	8.591	216.962	1.177	2500.921	13.882
Ecad MO CO	Clone- Clone	h2b10	8.591	195.171	2.768	1135.984	13.882
Ecad MO CO	Clone- Clone
Ecad MO CO	Clone- Clone	h2b11	14.535	633.635	69.945	3802.188	23.545
Ecad MO CO	Clone- Clone	h2b11	14.535	463.946	44.85	4045.596	23.545
Ecad MO CO	Clone- Clone	h2b11	14.535	417.221	24.625	4090.958	23.545
Ecad MO CO	Clone- Clone	h2b11	14.535	350.27	5.681	2963.012	23.545
Ecad MO CO	Clone- Clone	h2b11	14.535	304.145	1.114	2211.475	23.545
Ecad MO CO	Clone- Clone	h2b11	14.535	220.294	0.748	2518.738	23.545
Ecad MO CO	Clone- Clone	h2b11	14.535	172.295	0.191	1923.828	23.545
Ecad MO CO	Clone- Clone
Ecad MO CO	Clone- Clone	h2b12	12.32	606.16	30.027	4060.148	19.944
Ecad MO CO	Clone- Clone	h2b12	12.32	573.409	46.981	3063.691	19.944
Ecad MO CO	Clone- Clone	h2b12	12.32	503.238	43.84	2406.896	19.944
Ecad MO CO	Clone- Clone	h2b12	12.32	472.681	33.194	3626.391	19.944
Ecad MO CO	Clone- Clone	h2b12	12.32	465.877	12.405	4095	19.944
Ecad MO CO	Clone- Clone	h2b12	12.32	447.149	11.455	4095	19.944
Ecad MO CO	Clone- Clone	h2b12	12.32	363.438	16.833	2010.227	19.944
Ecad MO CO	Clone- Clone	h2b12	12.32	285.703	22.775	1319.924	19.944
Ecad MO CO	Clone- Clone
Ecad MO CO	Clone- Clone	h2b13	7.727	469.147	20.031	4095	12.461
Ecad MO CO	Clone- Clone	h2b13	7.727	421.92	33.221	4091.457	12.461
Ecad MO CO	Clone- Clone	h2b13	7.727	383.867	41.568	3802.994	12.461
Ecad MO CO	Clone- Clone	h2b13	7.727	316.009	27.497	1831.063	12.461
Ecad MO CO	Clone- Clone	h2b13	7.727	248.558	6.949	1293.2	12.461
Ecad MO CO	Clone- Clone	h2b13	7.727	267.206	2.863	2330.02	12.461
Ecad MO CO	Clone- Clone
Ecad MO CO	Clone- Clone	h2b14	5.782	204.974	16.569	1190.907	9.313
Ecad MO CO	Clone- Clone	h2b14	5.782	183.341	14.876	986.873	9.313
Ecad MO CO	Clone- Clone	h2b14	5.782	195.901	15.826	1123.566	9.313
Ecad MO CO	Clone- Clone	h2b14	5.782	295.803	33.715	1197.491	9.313
Ecad MO CO	Clone- Clone	h2b14	5.782	409.393	25.771	3113.379	9.313
Ecad MO CO	Clone- Clone	h3b1	5.836	872.937	47.411	4095	9.401
Ecad MO CO	Clone- Clone	h3b1	5.836	981.777	17.645	4095	9.401
Ecad MO CO	Clone- Clone	h3b1	5.836	846.333	48.281	4095	9.401
Ecad MO CO	Clone- Clone	h3b1	5.836	562.223	48.856	3205.474	9.401
Ecad MO CO	Clone- Clone	h3b1	5.836	422.709	38.737	1387.953	9.401
Ecad MO CO	Clone- Clone
Ecad MO CO	Clone- Clone	h3b2	10.266	640.284	10.7	4095	16.599
Ecad MO CO	Clone- Clone	h3b2	10.266	755.707	1.405	4095	16.599
Ecad MO CO	Clone- Clone	h3b2	10.266	829.487	14.535	4095	16.599
Ecad MO CO	Clone- Clone	h3b2	10.266	690.83	17.511	3992.516	16.599
Ecad MO CO	Clone- Clone	h3b2	10.266	536.068	17.992	3558.111	16.599
Ecad MO CO	Clone- Clone
Ecad MO CO	Clone- Clone	h3b3	9.78	608.256	21.061	3985.558	15.815
Ecad MO CO	Clone- Clone	h3b3	9.78	618.569	47.907	4095	15.815
Ecad MO CO	Clone- Clone	h3b3	9.78	625.056	25.288	4095	15.815
Ecad MO CO	Clone- Clone	h3b3	9.78	598.646	42.498	4095	15.815
Ecad MO CO	Clone- Clone	h3b3	9.78	509.602	9.219	4095	15.815
Ecad MO CO	Clone- Clone	h3b3	9.78	434.665	18.331	2711.547	15.815
Ecad MO CO	Clone- Clone	h3b3	9.78	326.994	13.914	2737.261	15.815
Ecad MO CO	Clone- Clone
Ecad MO CO	Clone- Clone	h3b4	10.807	797.209	24	4095	17.484
Ecad MO CO	Clone- Clone	h3b4	10.807	916.741	4.457	4095	17.484
Ecad MO CO	Clone- Clone	h3b4	10.807	933.144	15.735	4095	17.484
Ecad MO CO	Clone- Clone	h3b4	10.807	798.441	16.905	4095	17.484
Ecad MO CO	Clone- Clone	h3b4	10.807	444.015	33.271	2172.826	17.484
Ecad MO CO	Clone- Clone	h3b4	10.807	240.155	21.426	1389.029	17.484
Ecad MO CO	Clone- Clone
Ecad MO CO	Clone- Clone	h3b5	10.645	1063.617	50.599	4095	17.22
Ecad MO CO	Clone- Clone	h3b5	10.645	1183.27	90.751	4095	17.22
Ecad MO CO	Clone- Clone	h3b5	10.645	1189.898	63.08	4095	17.22
Ecad MO CO	Clone- Clone	h3b5	10.645	1018.774	62.408	4095	17.22
Ecad MO CO	Clone- Clone	h3b5	10.645	739.49	54.41	4095	17.22
Ecad MO CO	Clone- Clone	h3b5	10.645	477.79	54.599	3947.957	17.22
Ecad MO CO	Clone- Clone
Ecad MO CO	Clone- Clone	h3b6	7.187	968.485	70.983	4095	11.597
Ecad MO CO	Clone- Clone	h3b6	7.187	866.363	31.925	4095	11.597
Ecad MO CO	Clone- Clone	h3b6	7.187	680.471	38.357	4095	11.597
Ecad MO CO	Clone- Clone	h3b6	7.187	465.941	27.485	3993.671	11.597
Ecad MO CO	Clone- Clone
Ecad MO CO	Clone- Clone	h3b7	9.294	516.899	81.974	4095	15.024
Ecad MO CO	Clone- Clone	h3b7	9.294	799.67	109.977	4095	15.024
Ecad MO CO	Clone- Clone	h3b7	9.294	1150.066	55.186	4095	15.024
Ecad MO CO	Clone- Clone	h3b7	9.294	1003.737	77.344	4095	15.024
Ecad MO CO	Clone- Clone	h3b7	9.294	885.118	125.944	4095	15.024
Ecad MO CO	Clone- Clone	h3b7	9.294	649.804	119.46	3208.387	15.024
Ecad MO CO	Clone- Clone	h3b7	9.294	431.473	28.4	3123.499	15.024
Ecad MO CO	Clone- Clone	h4b1	10.158	788.63	48.384	4030.865	16.428
Ecad MO CO	Clone- Clone	h4b1	10.158	776.228	50.579	4094.476	16.428
Ecad MO CO	Clone- Clone	h4b1	10.158	742.935	45.578	3938.915	16.428
Ecad MO CO	Clone- Clone	h4b1	10.158	774.671	60.627	3586.911	16.428
Ecad MO CO	Clone- Clone	h4b1	10.158	869.781	77.745	3299.061	16.428
Ecad MO CO	Clone- Clone	h4b1	10.158	912.574	79.119	2822.368	16.428
Ecad MO CO	Clone- Clone	h4b1	10.158	900.542	95.665	3804.556	16.428
Ecad MO CO	Clone- Clone	h4b1	10.158	809.709	76	3980.683	16.428
Ecad MO CO	Clone- Clone
Ecad MO CO	Clone- Clone	h4b2	7.835	979.89	108.909	4095	12.642
Ecad MO CO	Clone- Clone	h4b2	7.835	785.396	47.801	4095	12.642
Ecad MO CO	Clone- Clone	h4b2	7.835	685.162	33.679	4095	12.642
Ecad MO CO	Clone- Clone	h4b2	7.835	596.831	31.049	3901.963	12.642
Ecad MO CO	Clone- Clone	h4b2	7.835	502.474	6.554	4095	12.642
Ecad MO CO	Clone- Clone	h4b2	7.835	411.329	2.74	2458.769	12.642
Ecad MO CO	Clone- Clone	h4b2	7.835	329.867	9.581	1776.899	12.642
Ecad MO CO	Clone- Clone
Ecad MO CO	Clone- Clone	h4b3	6.322	584.259	91.824	3222.473	10.192
Ecad MO CO	Clone- Clone	h4b3	6.322	731.815	100.862	3998.697	10.192
Ecad MO CO	Clone- Clone	h4b3	6.322	788.673	87.804	3247.83	10.192
Ecad MO CO	Clone- Clone	h4b3	6.322	779.424	75.439	4095	10.192
Ecad MO CO	Clone- Clone	h4b3	6.322	738.914	61.345	4095	10.192
Ecad MO CO	Clone- Clone	h4b3	6.322	559.008	36.956	2005.557	10.192
Ecad MO CO	Clone- Clone
Ecad MO CO	Clone- Clone	h4b4	9.78	1000.478	88.793	4095	15.815
Ecad MO CO	Clone- Clone	h4b4	9.78	781.581	68.801	3307.596	15.815
Ecad MO CO	Clone- Clone	h4b4	9.78	568.55	25.765	4095	15.815
Ecad MO CO	Clone- Clone	h4b4	9.78	418.62	19.98	3995.124	15.815
Ecad MO CO	Clone- Clone	h4b4	9.78	228.065	8.454	1275.342	15.815
Ecad MO CO	Clone- Clone
Ecad MO CO	Clone- Clone	h4b5	7.349	595.285	84.657	2003.584	11.86
Ecad MO CO	Clone- Clone	h4b5	7.349	477.096	39.909	2401.107	11.86
Ecad MO CO	Clone- Clone	h4b5	7.349	405.53	31.65	2661.055	11.86
Ecad MO CO	Clone- Clone	h4b5	7.565	1066.003	142.278	4090.73	12.212
Ecad MO CO	Clone- Clone	h4b5	7.565	745.544	74.96	2876.674	12.212
Ecad MO CO	Clone- Clone	h4b5	7.565	468.191	13.706	4071.008	12.212
Ecad MO CO	Clone- Clone	h4b5	7.565	361.036	5.982	4094.908	12.212
Ecad MO CO	Clone- Clone	h4b5	7.565	251.984	2.377	3831.323	12.212
Ecad MO CO	Clone- Clone
Ecad MO CO	Clone- Clone	h4b6	9.672	1208.897	8.698	4095	15.639
Ecad MO CO	Clone- Clone	h4b6	9.672	1034.664	49.239	4095	15.639
Ecad MO CO	Clone- Clone	h4b6	9.672	516.22	26.035	3094.716	15.639
Ecad MO CO	Clone- Clone	h4b6	9.672	348.515	16.511	2795.325	15.639
Ecad MO CO	Clone- Clone	h4b6	9.672	223.797	3.591	1936.123	15.639
Ecad MO CO	Clone- Clone
Ecad MO CO	Clone- Clone	h4b7	7.133	1475.078	223.458	4095	11.509
Ecad MO CO	Clone- Clone	h4b7	7.133	1454.347	186.496	4095	11.509
Ecad MO CO	Clone- Clone	h4b7	7.133	1262.341	148.837	4095	11.509
Ecad MO CO	Clone- Clone	h4b7	7.133	941.599	53.072	4095	11.509
Ecad MO CO	Clone- Clone	h4b7	7.133	625.309	46.374	4095	11.509
Ecad MO CO	Clone- Clone	h4b7	7.133	311.489	9.113	1616.114	11.509
Ecad MO PO	Non Clone- Clone	h1b1	9.132	1034.884	80.164	4095	14.76
Ecad MO PO	Non Clone- Clone	h1b1	9.132	924.509	26.485	4029.799	14.76
Ecad MO PO	Non Clone- Clone	h1b1	9.132	715.156	65.211	4095	14.76
Ecad MO PO	Non Clone- Clone	h1b1	9.132	606.903	29.007	4095	14.76
Ecad MO PO	Non Clone- Clone
Ecad MO PO	Non Clone- Clone	h1b2	7.024	1333.004	124.658	4095	11.334
Ecad MO PO	Non Clone- Clone	h1b2	7.024	1576.014	112.786	4095	11.334
Ecad MO PO	Non Clone- Clone	h1b2	7.024	1667.634	165.282	4095	11.334
Ecad MO PO	Non Clone- Clone	h1b2	7.024	1542.869	203.764	4095	11.334
Ecad MO PO	Non Clone- Clone	h1b2	7.024	807.331	58.85	3729.492	11.334
Ecad MO PO	Non Clone- Clone	h1b2	7.024	496.018	61.992	3474.16	11.334
Ecad MO PO	Non Clone- Clone
Ecad MO PO	Non Clone- Clone	h1b3	5.349	1699.744	134.862	4095	8.61
Ecad MO PO	Non Clone- Clone	h1b3	5.349	987.457	109.117	3821.012	8.61
Ecad MO PO	Non Clone- Clone	h1b3	5.349	484.941	90.829	1361.959	8.61
Ecad MO PO	Non Clone- Clone	h1b3	5.349	210.077	52.27	468.546	8.61
Ecad MO PO	Non Clone- Clone	h1b3	5.349	85.691	8.394	389.119	8.61
Ecad MO PO	Non Clone- Clone	h2b1	4.377	579.829	39.144	4090.365	7.029
Ecad MO PO	Non Clone- Clone	h2b1	4.377	325.684	58.421	1429.128	7.029
Ecad MO PO	Non Clone- Clone	h2b1	4.377	202.649	18.289	1392.85	7.029
Ecad MO PO	Non Clone- Clone	h2b1	4.377	177.458	18.425	858.503	7.029
Ecad MO PO	Non Clone- Clone
Ecad MO PO	Non Clone- Clone	h2b2	10.05	560.812	21.606	2768.137	16.254
Ecad MO PO	Non Clone- Clone	h2b2	10.05	382.046	41.949	4095	16.254
Ecad MO PO	Non Clone- Clone	h2b2	10.05	351.932	28.445	4072.134	16.254
Ecad MO PO	Non Clone- Clone	h2b2	10.05	274.756	16.61	2418.101	16.254
Ecad MO PO	Non Clone- Clone	h2b2	10.05	181.272	12.757	2475.172	16.254
Ecad MO PO	Non Clone- Clone
Ecad MO PO	Non Clone- Clone	h2b3	12.104	850.296	33.138	4095	19.593
Ecad MO PO	Non Clone- Clone	h2b3	12.104	730.711	5.642	4095	19.593
Ecad MO PO	Non Clone- Clone	h2b3	12.104	493.676	34.945	3931.453	19.593
Ecad MO PO	Non Clone- Clone	h2b3	12.104	330.337	21.409	2528.445	19.593
Ecad MO PO	Non Clone- Clone	h2b3	12.104	316.956	31.83	2214.163	19.593
Ecad MO PO	Non Clone- Clone	h2b3	12.104	297.22	16.657	2426.681	19.593
Ecad MO PO	Non Clone- Clone	h2b3	12.104	302.709	16.532	3101.169	19.593
Ecad MO PO	Non Clone- Clone
Ecad MO PO	Non Clone- Clone	h2b4	7.943	455.964	28.599	4095	12.827
Ecad MO PO	Non Clone- Clone	h2b4	7.943	406.264	38.193	3976.175	12.827
Ecad MO PO	Non Clone- Clone	h2b4	7.943	322.416	31.031	1824.483	12.827
Ecad MO PO	Non Clone- Clone	h2b4	7.943	327.106	22.436	1761.306	12.827
Ecad MO PO	Non Clone- Clone
Ecad MO PO	Non Clone- Clone	h2b5	5.728	1135.652	37.664	4095	9.225
Ecad MO PO	Non Clone- Clone	h2b5	5.728	1322.276	31.918	4095	9.225
Ecad MO PO	Non Clone- Clone	h2b5	5.728	1134.082	76.602	4095	9.225
Ecad MO PO	Non Clone- Clone	h2b5	5.728	914.609	73.18	4095	9.225
Ecad MO PO	Non Clone- Clone	h2b5	5.728	487.114	33.044	2431.416	9.225
Ecad MO PO	Non Clone- Clone	h2b5	5.728	327.968	23.495	1479.447	9.225
Ecad MO PO	Non Clone- Clone
Ecad MO PO	Non Clone- Clone	h2b6	7.565	948.503	57.074	4095	12.212
Ecad MO PO	Non Clone- Clone	h2b6	7.565	1003.815	70.563	4095	12.212
Ecad MO PO	Non Clone- Clone	h2b6	7.565	913.368	65.967	4095	12.212
Ecad MO PO	Non Clone- Clone	h2b6	7.565	739.601	17.701	4095	12.212
Ecad MO PO	Non Clone- Clone	h2b6	7.565	645.643	31.193	4079.635	12.212
Ecad MO PO	Non Clone- Clone	h2b6	7.565	518.094	15.336	3724.818	12.212
Ecad MO PO	Non Clone- Clone	h3b1	9.888	802.036	64.689	4095	15.99
Ecad MO PO	Non Clone- Clone	h3b1	9.888	692.253	47.451	4095	15.99
Ecad MO PO	Non Clone- Clone	h3b1	9.888	519.788	47.169	4029.466	15.99
Ecad MO PO	Non Clone- Clone	h3b1	11.779	721.178	6.089	4095	19.065
Ecad MO PO	Non Clone- Clone	h3b1	11.779	552.821	39.504	4095	19.065
Ecad MO PO	Non Clone- Clone	h3b1	11.779	393.843	33.909	4095	19.065
Ecad MO PO	Non Clone- Clone	h3b1	11.779	240.319	17.434	1767.126	19.065
Ecad MO PO	Non Clone- Clone	h4b1	9.24	1255.004	102.5	4095	14.935
Ecad MO PO	Non Clone- Clone	h4b1	9.24	749.39	82.758	4095	14.935
Ecad MO PO	Non Clone- Clone	h4b1	9.24	529.913	71.652	3750.363	14.935
Ecad MO PO	Non Clone- Clone	h4b1	9.24	362.884	59.61	4067.709	14.935
Ecad MO PO	Non Clone- Clone	h4b1	9.24	263.819	23.402	2833.88	14.935
Ecad MO PO	Non Clone- Clone
Ecad MO PO	Non Clone- Clone	h4b2	8.321	892.285	62.958	3098.84	13.442
Ecad MO PO	Non Clone- Clone	h4b2	8.321	776.723	39.941	3253.678	13.442
Ecad MO PO	Non Clone- Clone	h4b2	8.321	600.258	36.902	3706.749	13.442
Ecad MO PO	Non Clone- Clone	h4b2	8.321	479.862	62.205	3084.551	13.442
Ecad MO PO	Non Clone- Clone	h4b2	8.321	420.025	36.519	2662.289	13.442
Ecad MO NO	Non Clone- Non Clone	h1b1	5.998	1986.865	69.367	4095	9.664
Ecad MO NO	Non Clone- Non Clone	h1b1	5.998	1546.491	106.705	4095	9.664
Ecad MO NO	Non Clone- Non Clone	h1b1	5.998	782.905	138.193	3795.247	9.664
Ecad MO NO	Non Clone- Non Clone	h1b1	5.998	337.67	80.881	1362.249	9.664
Ecad MO NO	Non Clone- Non Clone	h1b1	5.998	231.182	30.316	1592.103	9.664
Ecad MO NO	Non Clone- Non Clone
Ecad MO NO	Non Clone- Non Clone	h1b2	5.025	1149.119	145.988	4095	8.083
Ecad MO NO	Non Clone- Non Clone	h1b2	5.025	846.45	177.886	3971.336	8.083
Ecad MO NO	Non Clone- Non Clone	h1b2	5.025	434.857	81.346	1831.512	8.083
Ecad MO NO	Non Clone- Non Clone	h1b2	5.025	195.9	22.306	622.418	8.083
Ecad MO NO	Non Clone- Non Clone	h1b2	5.025	117.401	4.538	366.452	8.083
Ecad MO NO	Non Clone- Non Clone
Ecad MO NO	Non Clone- Non Clone	h1b3	8.591	1978.026	326.392	4095	13.882
Ecad MO NO	Non Clone- Non Clone	h1b3	8.591	1452.064	277.127	4095	13.882
Ecad MO NO	Non Clone- Non Clone	h1b3	8.591	722.754	111.719	2550.289	13.882
Ecad MO NO	Non Clone- Non Clone	h1b3	8.591	295.336	49.037	1218.572	13.882
Ecad MO NO	Non Clone- Non Clone	h1b3	8.591	208.225	7.776	1825.83	13.882
Ecad MO NO	Non Clone- Non Clone	h1b3	8.591	155.771	11.728	1929.095	13.882
Ecad MO NO	Non Clone- Non Clone
Ecad MO NO	Non Clone- Non Clone	h1b4	7.133	2237.296	307.556	4095	11.507
Ecad MO NO	Non Clone- Non Clone	h1b4	7.133	2306.224	379.69	4095	11.507
Ecad MO NO	Non Clone- Non Clone	h1b4	7.133	1789.332	325.992	4095	11.507
Ecad MO NO	Non Clone- Non Clone	h1b4	7.133	989.291	185.073	3834.022	11.507
Ecad MO NO	Non Clone- Non Clone	h1b4	7.133	464.825	68.105	1439.852	11.507
Ecad MO NO	Non Clone- Non Clone	h1b4	7.133	259.078	34.3	1173.91	11.507
Ecad MO NO	Non Clone- Non Clone
Ecad MO NO	Non Clone- Non Clone	h1b5	9.942	1592.001	63.408	4095	16.078
Ecad MO NO	Non Clone- Non Clone	h1b5	9.942	1254.981	73.861	4095	16.078
Ecad MO NO	Non Clone- Non Clone	h1b5	9.942	612.372	98.094	2051.31	16.078
Ecad MO NO	Non Clone- Non Clone	h1b5	9.942	286.775	38.307	963.43	16.078
Ecad MO NO	Non Clone- Non Clone	h1b5	9.942	174.427	15.715	1085.959	16.078
Ecad MO NO	Non Clone- Non Clone	h1b5	9.942	113.829	7.963	524.232	16.078
Ecad MO NO	Non Clone- Non Clone	h1b5	9.942	83.853	4.665	637.899	16.078
Ecad MO NO	Non Clone- Non Clone
Ecad MO NO	Non Clone- Non Clone	h1b6	6.43	966.452	105.739	4095	10.367
Ecad MO NO	Non Clone- Non Clone	h1b6	6.43	527.636	10.829	3463.866	10.367
Ecad MO NO	Non Clone- Non Clone	h1b6	6.43	279.384	23.331	1962.419	10.367
Ecad MO NO	Non Clone- Non Clone	h1b6	6.43	153.252	8.036	1238.21	10.367
Ecad MO NO	Non Clone- Non Clone
Ecad MO NO	Non Clone- Non Clone	h1b7	8.267	1650.018	162.44	4095	13.352
Ecad MO NO	Non Clone- Non Clone	h1b7	8.267	903.99	101.023	4095	13.352
Ecad MO NO	Non Clone- Non Clone	h1b7	8.267	638.718	64.375	4095	13.352
Ecad MO NO	Non Clone- Non Clone	h1b7	8.267	393.683	39.132	3821.594	13.352
Ecad MO NO	Non Clone- Non Clone	h1b7	8.267	213.246	20.505	831.202	13.352
Ecad MO NO	Non Clone- Non Clone	h1b7	8.267	174.261	4.17	1058.86	13.352
Ecad MO NO	Non Clone- Non Clone	h3b1	9.51	1842.543	214.879	4095	15.375
Ecad MO NO	Non Clone- Non Clone	h3b1	9.51	1942.069	247.944	4095	15.375
Ecad MO NO	Non Clone- Non Clone	h3b1	9.51	1753.34	261.349	4095	15.375
Ecad MO NO	Non Clone- Non Clone	h3b1	9.51	1374.552	141.363	4095	15.375
Ecad MO NO	Non Clone- Non Clone	h3b1	9.51	386.237	51.204	2726.079	15.375
Ecad MO NO	Non Clone- Non Clone
Ecad MO NO	Non Clone- Non Clone	h3b2	9.24	1032.295	139.5	4095	14.936
Ecad MO NO	Non Clone- Non Clone	h3b2	9.24	1041.247	80.648	4095	14.936
Ecad MO NO	Non Clone- Non Clone	h3b2	9.24	883.636	105.423	4095	14.936
Ecad MO NO	Non Clone- Non Clone	h3b2	9.24	634.024	71.248	3042.156	14.936
Ecad MO NO	Non Clone- Non Clone	h3b2	9.24	505.825	23.033	3787.96	14.936
Ecad MO NO	Non Clone- Non Clone	h3b2	9.24	388.201	11.309	3574.981	14.936
Ecad MO NO	Non Clone- Non Clone
Ecad MO NO	Non Clone- Non Clone	h3b3	10.429	790.55	85.869	4095	16.869
Ecad MO NO	Non Clone- Non Clone	h3b3	10.429	693.55	97.438	4095	16.869
Ecad MO NO	Non Clone- Non Clone	h3b3	10.429	483.607	28.219	4095	16.869
Ecad MO NO	Non Clone- Non Clone	h3b3	10.429	406.959	30.181	4095	16.869
Ecad MO NO	Non Clone- Non Clone	h3b3	10.429	344.746	18.627	4095	16.869
Ecad MO NO	Non Clone- Non Clone	h3b3	10.429	239.302	8.223	4095	16.869
Ecad MO NO	Non Clone- Non Clone	h4b1	8.429	1225.768	18.712	4095	13.618
Ecad MO NO	Non Clone- Non Clone	h4b1	8.429	1019.147	82.579	4095	13.618
Ecad MO NO	Non Clone- Non Clone	h4b1	8.429	603.035	86.581	4077.859	13.618
Ecad MO NO	Non Clone- Non Clone	h4b1	8.429	249.986	18.568	2099.409	13.618
Ecad MO NO	Non Clone- Non Clone	h4b1	8.429	183.548	14.586	986.891	13.618
Ecad MO NO	Non Clone- Non Clone
Ecad MO NO	Non Clone- Non Clone	h4b2	8.375	1255.288	118.15	4095	13.53
Ecad MO NO	Non Clone- Non Clone	h4b2	8.375	1098.175	129.062	4095	13.53
Ecad MO NO	Non Clone- Non Clone	h4b2	8.375	864.822	68.3	4095	13.53
Ecad MO NO	Non Clone- Non Clone	h4b2	8.375	574.97	45.333	4095	13.53
Ecad MO NO	Non Clone- Non Clone	h4b2	8.375	351.295	19.39	4095	13.53
Ecad MO NO	Non Clone- Non Clone
Ecad MO NO	Non Clone- Non Clone	h4b3	8.159	1144.627	51.499	4091.032	13.179
Ecad MO NO	Non Clone- Non Clone	h4b3	8.159	1177.977	71.737	4095	13.179
Ecad MO NO	Non Clone- Non Clone	h4b3	8.159	1085.48	87.474	4095	13.179
Ecad MO NO	Non Clone- Non Clone	h4b3	8.159	646.552	28.811	2670.763	13.179
Ecad MO NO	Non Clone- Non Clone	h4b3	8.159	440.776	14.055	1648.973	13.179
Ecad MO NO	Non Clone- Non Clone	h4b3	8.159	276.078	10.285	1319.45	13.179
Ecad MO NO	Non Clone- Non Clone	h4b3	8.159	166.019	0.533	1050.836	13.179
Ecad MO NO	Non Clone- Non Clone	h4b3	8.159	82.586	0.099	1370.904	13.179
