# Supplementary material for: Stepwise polarisation of developing bilayered epidermis is mediated by aPKC and E-cadherin in zebrafish
Source: eLife journal article supplement (doi:10.7554/elife.49064), 2020-01-22
Supplement: fig4-data3 [file elife-49064-fig4-data3-v1.csv]

Genotype	Boundary	Cell name	Area	Mean	Min	Max	Length
Ctrl MO CO	Clone- Clone	h1b1	10.321	621.255	57.533	1921.878	16.693
Ctrl MO CO	Clone- Clone	h1b1	10.321	950.597	92.922	4095	16.693
Ctrl MO CO	Clone- Clone	h1b1	10.321	1049.988	170.834	4095	16.693
Ctrl MO CO	Clone- Clone	h1b1	10.321	1299.74	170.023	4095	16.693
Ctrl MO CO	Clone- Clone	h1b1	10.321	1548.082	193.401	4095	16.693
Ctrl MO CO	Clone- Clone	h1b1	10.483	1737.547	232.977	4095	16.956
Ctrl MO CO	Clone- Clone	h1b1	10.483	1445.549	210.651	4095	16.956
Ctrl MO CO	Clone- Clone	h1b1	10.483	1173.869	199.085	4057.368	16.956
Ctrl MO CO	Clone- Clone
Ctrl MO CO	Clone- Clone	h1b2	8.591	789.587	38.88	3555.161	13.882
Ctrl MO CO	Clone- Clone	h1b2	8.591	931.801	77.397	3168.196	13.882
Ctrl MO CO	Clone- Clone	h1b2	8.591	931.801	77.397	3168.196	13.882
Ctrl MO CO	Clone- Clone	h1b2	8.591	1078.037	172.715	4094.619	13.882
Ctrl MO CO	Clone- Clone	h1b2	8.591	1426.582	187.86	4095	13.882
Ctrl MO CO	Clone- Clone	h1b2	8.591	1887.197	310.479	4095	13.882
Ctrl MO CO	Clone- Clone	h1b2	8.591	2065.799	91.282	4095	13.882
Ctrl MO CO	Clone- Clone	h1b2	8.591	1342.676	128.855	4095	13.882
Ctrl MO CO	Clone- Clone
Ctrl MO CO	Clone- Clone	h1b3	8.429	259.306	0.021	1183.14	13.602
Ctrl MO CO	Clone- Clone	h1b3	8.429	576.032	0.555	3969.629	13.602
Ctrl MO CO	Clone- Clone	h1b3	8.429	601.238	1.087	4095	13.602
Ctrl MO CO	Clone- Clone	h1b3	8.429	637.791	2.953	4095	13.602
Ctrl MO CO	Clone- Clone	h1b3	8.429	754.49	14.059	4095	13.602
Ctrl MO CO	Clone- Clone	h1b3	8.429	885.302	31.71	4095	13.602
Ctrl MO CO	Clone- Clone	h1b3	8.429	815.814	56.653	4095	13.602
Ctrl MO CO	Clone- Clone
Ctrl MO CO	Clone- Clone	h1b4	7.943	625.519	3.918	3029.913	12.827
Ctrl MO CO	Clone- Clone	h1b4	7.943	767.457	12.43	4095	12.827
Ctrl MO CO	Clone- Clone	h1b4	7.943	737.352	17.454	4095	12.827
Ctrl MO CO	Clone- Clone	h1b4	7.943	791.301	21.913	4095	12.827
Ctrl MO CO	Clone- Clone	h1b4	7.943	890.046	44.45	4095	12.827
Ctrl MO CO	Clone- Clone	h1b4	8.159	2201.624	202.733	4095	13.179
Ctrl MO CO	Clone- Clone	h1b4	8.159	1641.328	282.063	4094.517	13.179
Ctrl MO CO	Clone- Clone	h1b4	8.159	1363.427	168.878	3957.89	13.179
Ctrl MO CO	Clone- Clone	h2b1	11.239	545.021	15.464	2291.472	18.187
Ctrl MO CO	Clone- Clone	h2b1	11.239	966.231	52.473	3462.901	18.187
Ctrl MO CO	Clone- Clone	h2b1	11.239	1206.729	121.506	4095	18.187
Ctrl MO CO	Clone- Clone	h2b1	11.239	1584.134	110.814	4095	18.187
Ctrl MO CO	Clone- Clone	h2b1	11.239	1727.482	216.045	4095	18.187
Ctrl MO CO	Clone- Clone	h2b1	11.239	2191.164	171.882	4095	18.187
Ctrl MO CO	Clone- Clone	h2b1	11.239	2484.832	249.893	4095	18.187
Ctrl MO CO	Clone- Clone	h2b1	11.239	1885.985	200.32	4095	18.187
Ctrl MO CO	Clone- Clone
Ctrl MO CO	Clone- Clone	h2b2	7.997	481.605	7.545	3112.257	12.915
Ctrl MO CO	Clone- Clone	h2b2	7.997	644.743	5.247	4095	12.915
Ctrl MO CO	Clone- Clone	h2b2	7.997	673.257	54.881	4095	12.915
Ctrl MO CO	Clone- Clone	h2b2	7.997	719.489	88.012	4095	12.915
Ctrl MO CO	Clone- Clone	h2b2	7.997	849.502	115.45	4095	12.915
Ctrl MO CO	Clone- Clone	h2b2	7.997	1045.666	161.517	4095	12.915
Ctrl MO CO	Clone- Clone
Ctrl MO CO	Clone- Clone	h2b3	5.295	573.959	82.757	1198.317	8.522
Ctrl MO CO	Clone- Clone	h2b3	5.295	1012.539	91.858	2597.169	8.522
Ctrl MO CO	Clone- Clone	h2b3	5.295	1230.525	252.916	4095	8.522
Ctrl MO CO	Clone- Clone	h2b3	5.295	1447.755	268.728	4095	8.522
Ctrl MO CO	Clone- Clone	h2b3	5.295	1560.87	392.957	4095	8.522
Ctrl MO CO	Clone- Clone	h2b3	5.295	1848.912	401.42	4095	8.522
Ctrl MO CO	Clone- Clone	h2b3	5.295	2119.478	520.138	4095	8.522
Ctrl MO CO	Clone- Clone	h2b3	5.295	1956.192	357.99	4095	8.522
Ctrl MO CO	Clone- Clone
Ctrl MO CO	Clone- Clone	h2b4	10.861	1058.442	22.637	4095	17.572
Ctrl MO CO	Clone- Clone	h2b4	10.861	1138.822	47.85	4095	17.572
Ctrl MO CO	Clone- Clone	h2b4	10.861	1133.766	49.736	4095	17.572
Ctrl MO CO	Clone- Clone	h2b4	10.861	1166.489	67.044	4095	17.572
Ctrl MO CO	Clone- Clone	h2b4	10.861	1163.688	70.538	4095	17.572
Ctrl MO CO	Clone- Clone	h2b4	10.861	1193.776	143.404	4095	17.572
Ctrl MO CO	Clone- Clone
Ctrl MO CO	Clone- Clone	h2b5	8.97	709.394	49.868	2526.678	14.496
Ctrl MO CO	Clone- Clone	h2b5	8.97	940.203	64.836	3868.628	14.496
Ctrl MO CO	Clone- Clone	h2b5	8.97	1036.538	48.622	4087.204	14.496
Ctrl MO CO	Clone- Clone	h2b5	8.97	1102.674	101.585	4052.675	14.496
Ctrl MO CO	Clone- Clone	h2b5	8.97	1250.772	102.806	4030.612	14.496
Ctrl MO CO	Clone- Clone	h2b5	8.97	1431.615	233.299	4066.133	14.496
Ctrl MO CO	Clone- Clone	h2b5	8.97	1436.064	294.551	4094.659	14.496
Ctrl MO CO	Clone- Clone	h3b1	8.754	346.896	3.771	1728.348	14.145
Ctrl MO CO	Clone- Clone	h3b1	8.754	511.787	36.724	2369.862	14.145
Ctrl MO CO	Clone- Clone	h3b1	8.754	728.427	47.225	3596.798	14.145
Ctrl MO CO	Clone- Clone	h3b1	8.754	920.702	89.431	4095	14.145
Ctrl MO CO	Clone- Clone	h3b1	8.754	1515.936	188.334	4095	14.145
Ctrl MO CO	Clone- Clone	h3b1	8.754	1995.109	215.509	4095	14.145
Ctrl MO CO	Clone- Clone	h3b1	8.754	2170.004	229.859	4095	14.145
Ctrl MO CO	Clone- Clone	h3b1	8.754	1960.55	256.298	4094.953	14.145
Ctrl MO CO	Clone- Clone	h3b1	8.754	1140.984	149.08	4095	14.145
Ctrl MO CO	Clone- Clone
Ctrl MO CO	Clone- Clone	h3b2	3.944	644.34	32.759	2467.971	6.326
Ctrl MO CO	Clone- Clone	h3b2	3.944	857.848	85.827	3000.126	6.326
Ctrl MO CO	Clone- Clone	h3b2	3.944	1089.474	219.074	3559.346	6.326
Ctrl MO CO	Clone- Clone	h3b2	3.944	1895.439	312.628	4095	6.326
Ctrl MO CO	Clone- Clone	h3b2	3.944	2457.209	571.96	4095	6.326
Ctrl MO CO	Clone- Clone	h3b2	3.944	2500.72	763.567	4095	6.326
Ctrl MO CO	Clone- Clone	h3b2	3.944	1809.046	379.112	3573.407	6.326
Ctrl MO CO	Clone- Clone	h3b2	3.944	724.798	235.744	3090.126	6.326
Ctrl MO CO	Clone- Clone
Ctrl MO CO	Clone- Clone	h3b3	12.374	800.565	43.891	3589.233	20.032
Ctrl MO CO	Clone- Clone	h3b3	12.374	919.495	62.289	4095	20.032
Ctrl MO CO	Clone- Clone	h3b3	12.374	1195.357	54.125	4095	20.032
Ctrl MO CO	Clone- Clone	h3b3	12.374	1410.022	63.03	4095	20.032
Ctrl MO CO	Clone- Clone	h3b3	12.374	1525.594	71.461	4095	20.032
Ctrl MO CO	Clone- Clone	h3b3	12.374	1506.307	72.186	4095	20.032
Ctrl MO CO	Clone- Clone	h3b3	12.374	1087.201	94.331	4095	20.032
Ctrl MO CO	Clone- Clone
Ctrl MO CO	Clone- Clone	h3b4	14.913	724.86	28.3	3858.222	24.161
Ctrl MO CO	Clone- Clone	h3b4	14.913	690.575	30.559	4095	24.161
Ctrl MO CO	Clone- Clone	h3b4	14.913	670.242	40.282	4095	24.161
Ctrl MO CO	Clone- Clone	h3b4	14.913	987.832	64.282	4095	24.161
Ctrl MO CO	Clone- Clone	h3b4	14.805	1646.153	78.495	4095	23.985
Ctrl MO CO	Clone- Clone	h3b4	14.805	1715.28	96.772	4095	23.985
Ctrl MO CO	Clone- Clone	h3b4	14.805	1684.973	133.703	4095	23.985
Ctrl MO CO	Clone- Clone	h3b4	14.805	1342.901	177.112	4095	23.985
Ctrl MO CO	Clone- Clone
Ctrl MO CO	Clone- Clone	h3b5	7.619	1096.389	125.15	4095	12.3
Ctrl MO CO	Clone- Clone	h3b5	7.619	1415.187	160.045	4095	12.3
Ctrl MO CO	Clone- Clone	h3b5	7.619	1777.799	155.045	4095	12.3
Ctrl MO CO	Clone- Clone	h3b5	7.619	2044.588	206.64	4095	12.3
Ctrl MO CO	Clone- Clone	h3b5	7.619	2086.092	229.817	4095	12.3
Ctrl MO CO	Clone- Clone	h3b5	7.619	1355.753	211.641	4095	12.3
Ctrl MO CO	Clone- Clone
Ctrl MO CO	Clone- Clone	h3b6	7.187	877.547	53.323	4087.23	11.597
Ctrl MO CO	Clone- Clone	h3b6	7.187	965.42	140.547	4095	11.597
Ctrl MO CO	Clone- Clone	h3b6	7.187	1200.313	176.547	4095	11.597
Ctrl MO CO	Clone- Clone	h3b6	7.187	1500.543	251.06	4095	11.597
Ctrl MO CO	Clone- Clone	h3b6	7.187	1920.251	228.758	4095	11.597
Ctrl MO CO	Clone- Clone	h3b6	7.187	1764.971	176.556	4095	11.597
Ctrl MO CO	Clone- Clone
Ctrl MO CO	Clone- Clone	h3b7	10.645	831.163	174.092	4018.983	17.22
Ctrl MO CO	Clone- Clone	h3b7	10.645	1009.959	176.357	4095	17.22
Ctrl MO CO	Clone- Clone	h3b7	10.645	974.722	106.775	4095	17.22
Ctrl MO CO	Clone- Clone	h3b7	10.645	1049.278	157.788	4095	17.22
Ctrl MO CO	Clone- Clone	h3b7	10.645	1102.843	138.074	4095	17.22
Ctrl MO CO	Clone- Clone	h3b7	10.645	1348.695	188.859	4095	17.22
Ctrl MO CO	Clone- Clone	h3b7	10.645	1647.363	206.14	4095	17.22
Ctrl MO CO	Clone- Clone	h4b1	12.32	721.537	58.019	3814.241	19.944
Ctrl MO CO	Clone- Clone	h4b1	12.32	1522.548	110.617	4095	19.944
Ctrl MO CO	Clone- Clone	h4b1	12.32	1601.647	111.861	4095	19.944
Ctrl MO CO	Clone- Clone	h4b1	12.32	1553.548	150.446	4095	19.944
Ctrl MO CO	Clone- Clone	h4b1	12.32	1861.297	206.693	4095	19.944
Ctrl MO CO	Clone- Clone	h4b1	12.266	2459.933	129.807	4095	19.856
Ctrl MO CO	Clone- Clone	h4b1	12.266	2174.703	187.131	4095	19.856
Ctrl MO CO	Clone- Clone	h4b1	12.266	1672.223	102.143	4095	19.856
Ctrl MO CO	Clone- Clone	h4b1	12.266	1113.869	45.058	4095	19.856
Ctrl MO CO	Clone- Clone
Ctrl MO CO	Clone- Clone	h4b2	3.728	1740.627	237.117	4095	5.974
Ctrl MO CO	Clone- Clone	h4b2	3.728	2025.332	231.435	4095	5.974
Ctrl MO CO	Clone- Clone	h4b2	3.728	2165.433	202.822	4095	5.974
Ctrl MO CO	Clone- Clone	h4b2	3.728	1933.301	330.153	4095	5.974
Ctrl MO CO	Clone- Clone	h4b2	3.728	1701.488	474.687	4095	5.974
Ctrl MO CO	Clone- Clone	h4b2	3.728	1679.178	382.945	4047.863	5.974
Ctrl MO CO	Clone- Clone	h4b2	3.728	1442.778	247.793	4095	5.974
Ctrl MO CO	Clone- Clone
Ctrl MO CO	Clone- Clone	h4b3	9.618	689.887	16.307	2788.641	15.546
Ctrl MO CO	Clone- Clone	h4b3	9.618	1260.559	35.996	4078.362	15.546
Ctrl MO CO	Clone- Clone	h4b3	9.618	1519.889	42.372	4095	15.546
Ctrl MO CO	Clone- Clone	h4b3	9.618	1717.602	26.098	4095	15.546
Ctrl MO CO	Clone- Clone	h4b3	9.618	1521.055	64.154	4095	15.546
Ctrl MO CO	Clone- Clone	h4b3	9.51	2582.921	350.235	4095	15.375
Ctrl MO CO	Clone- Clone	h4b3	9.51	2314.726	350.952	4095	15.375
Ctrl MO CO	Clone- Clone	h4b3	9.51	1503.147	209.11	4095	15.375
Ctrl MO CO	Clone- Clone
Ctrl MO CO	Clone- Clone	h4b4	9.618	1337.697	93.145	3876.041	15.551
Ctrl MO CO	Clone- Clone	h4b4	9.618	1930.452	79.289	4095	15.551
Ctrl MO CO	Clone- Clone	h4b4	9.618	2026.19	140.631	4095	15.551
Ctrl MO CO	Clone- Clone	h4b4	9.618	2153.493	197.484	4095	15.551
Ctrl MO CO	Clone- Clone	h4b4	9.618	2588.325	203.037	4095	15.551
Ctrl MO CO	Clone- Clone	h4b4	9.618	1974.894	326.923	4095	15.551
Ctrl MO CO	Clone- Clone	h4b4	8.645	2908.322	561.516	4095	13.97
Ctrl MO CO	Clone- Clone	h4b4	8.645	2480.853	728.702	4095	13.97
Ctrl MO CO	Clone- Clone
Ctrl MO CO	Clone- Clone	h4b5	4.377	1519.828	155.404	4095	7.029
Ctrl MO CO	Clone- Clone	h4b5	4.377	2059.873	199.364	4095	7.029
Ctrl MO CO	Clone- Clone	h4b5	4.377	1972.802	208.182	4095	7.029
Ctrl MO CO	Clone- Clone	h4b5	4.377	1748.166	290.065	4095	7.029
Ctrl MO CO	Clone- Clone	h4b5	4.377	1970.765	230.441	4095	7.029
Ctrl MO CO	Clone- Clone	h4b5	4.377	2060.009	207.515	4095	7.029
Ctrl MO CO	Clone- Clone	h4b5	4.377	1679.829	214.402	4095	7.029
Ctrl MO CO	Clone- Clone	h4b5	4.377	1446.787	230.596	4095	7.029
Ctrl MO CO	Clone- Clone	h6b1	10.807	717.954	42.099	2248.742	17.484
Ctrl MO CO	Clone- Clone	h6b1	10.807	856.213	46.228	2672.771	17.484
Ctrl MO CO	Clone- Clone	h6b1	10.807	857.894	91.992	4081.95	17.484
Ctrl MO CO	Clone- Clone	h6b1	10.807	889.558	60.807	4095	17.484
Ctrl MO CO	Clone- Clone	h6b1	10.807	1082.496	66.622	4095	17.484
Ctrl MO CO	Clone- Clone	h6b1	10.807	1194.652	112.356	4095	17.484
Ctrl MO CO	Clone- Clone	h6b1	10.807	1129.232	120.251	3986.331	17.484
Ctrl MO CO	Clone- Clone	h6b1	10.807	1126.544	120.344	3968.877	17.484
Ctrl MO CO	Clone- Clone	h6b1	10.807	1179.154	155.63	4095	17.484
Ctrl MO CO	Clone- Clone	h6b1	10.807	1241.588	189.909	4084.718	17.484
Ctrl MO CO	Clone- Clone
Ctrl MO CO	Clone- Clone	h6b2	14.751	975.674	15.849	3572.706	23.898
Ctrl MO CO	Clone- Clone	h6b2	14.751	1170.134	16.888	4088.195	23.898
Ctrl MO CO	Clone- Clone	h6b2	14.751	1007.764	47.951	4095	23.898
Ctrl MO CO	Clone- Clone	h6b2	14.751	755.033	71.469	4095	23.898
Ctrl MO CO	Clone- Clone	h6b2	14.751	560.104	71.959	4095	23.898
Ctrl MO CO	Clone- Clone	h6b2	14.751	473.683	49.025	4076.911	23.898
Ctrl MO CO	Clone- Clone	h6b2	14.751	510.298	23.668	3854.905	23.898
Ctrl MO CO	Clone- Clone	h6b2	14.751	626.231	52.084	3744.182	23.898
Ctrl MO CO	Clone- Clone	h6b2	14.751	797.315	55.601	4071.085	23.898
Ctrl MO CO	Clone- Clone	h6b2	14.751	790.696	74.013	3994.531	23.898
Ctrl MO CO	Clone- Clone
Ctrl MO CO	Clone- Clone	h6b3	10.104	1149.957	85.353	3676.849	16.342
Ctrl MO CO	Clone- Clone	h6b3	10.104	1236.47	155.445	4095	16.342
Ctrl MO CO	Clone- Clone	h6b3	10.104	1090.433	264.588	4095	16.342
Ctrl MO CO	Clone- Clone	h6b3	10.104	1082.207	292.361	4095	16.342
Ctrl MO CO	Clone- Clone	h6b3	10.104	1280.417	167.946	4095	16.342
Ctrl MO CO	Clone- Clone	h6b3	10.104	1501.554	218.206	4095	16.342
Ctrl MO CO	Clone- Clone	h6b3	10.104	1517.688	280.157	4095	16.342
Ctrl MO CO	Clone- Clone	h6b3	10.104	1411.142	254.973	4095	16.342
Ctrl MO CO	Clone- Clone	h6b3	10.104	1145.981	178.364	3952.809	16.342
Ctrl MO CO	Clone- Clone
Ctrl MO CO	Clone- Clone	h6b4	9.024	771.216	61.415	2288.273	14.585
Ctrl MO CO	Clone- Clone	h6b4	9.024	936.75	76.321	2836.604	14.585
Ctrl MO CO	Clone- Clone	h6b4	9.024	893.326	62.271	3849.518	14.585
Ctrl MO CO	Clone- Clone	h6b4	9.024	892.604	152.907	4095	14.585
Ctrl MO CO	Clone- Clone	h6b4	9.024	1121.153	170.539	4095	14.585
Ctrl MO CO	Clone- Clone	h6b4	9.024	1612.107	169.647	4095	14.585
Ctrl MO CO	Clone- Clone	h6b4	9.024	1668.58	169.953	4095	14.585
Ctrl MO CO	Clone- Clone	h6b4	9.024	1543.419	184.091	4095	14.585
Ctrl MO CO	Clone- Clone	h6b4	9.024	1256.351	167.043	4095	14.585
Ctrl MO CO	Clone- Clone
Ctrl MO CO	Clone- Clone	h6b5	9.186	919.795	24.746	4094.3	14.848
Ctrl MO CO	Clone- Clone	h6b5	9.186	1054.508	24.38	4095	14.848
Ctrl MO CO	Clone- Clone	h6b5	9.186	1033.063	48.726	4095	14.848
Ctrl MO CO	Clone- Clone	h6b5	9.186	1027.439	58.362	4095	14.848
Ctrl MO CO	Clone- Clone	h6b5	9.186	1204.807	103.097	4095	14.848
Ctrl MO CO	Clone- Clone	h6b5	9.186	1474.524	119.921	4095	14.848
Ctrl MO CO	Clone- Clone	h6b5	9.186	1423.649	93.541	4095	14.848
Ctrl MO CO	Clone- Clone	h6b5	9.186	1194.728	68.54	3956.282	14.848
Ctrl MO CO	Clone- Clone	h6b5	9.186	939.368	120.401	4073.807	14.848
Ctrl MO CO	Clone- Clone
Ctrl MO CO	Clone- Clone	h6b6	7.295	872.545	62.468	2744.832	11.773
Ctrl MO CO	Clone- Clone	h6b6	7.295	983.775	59.385	4094.933	11.773
Ctrl MO CO	Clone- Clone	h6b6	7.295	917.079	37.097	4095	11.773
Ctrl MO CO	Clone- Clone	h6b6	7.295	880.953	104.087	4095	11.773
Ctrl MO CO	Clone- Clone	h6b6	7.295	1047.831	117.981	4095	11.773
Ctrl MO CO	Clone- Clone	h6b6	7.295	1321.185	126.684	4095	11.773
Ctrl MO CO	Clone- Clone	h6b6	7.295	1239.457	130.34	3932.778	11.773
Ctrl MO CO	Clone- Clone
Ctrl MO CO	Clone- Clone	h6b7	5.89	599.377	21.476	2666.119	9.489
Ctrl MO CO	Clone- Clone	h6b7	5.89	703.894	21.009	3502.46	9.489
Ctrl MO CO	Clone- Clone	h6b7	5.89	715.462	43.921	3421.865	9.489
Ctrl MO CO	Clone- Clone	h6b7	5.89	725.863	88.59	2915.495	9.489
Ctrl MO CO	Clone- Clone	h6b7	5.89	896.869	62.634	3525.29	9.489
Ctrl MO CO	Clone- Clone	h6b7	5.89	1201.331	202.837	4095	9.489
Ctrl MO CO	Clone- Clone	h6b7	5.89	1173.32	190.073	3970.681	9.489
Ctrl MO CO	Clone- Clone	h6b7	5.89	1093.119	212.89	3460.109	9.489
Ctrl MO CO	Clone- Clone	h6b7	5.89	1123.345	206.564	2925.378	9.489
Ctrl MO CO	Clone- Clone
Ctrl MO CO	Clone- Clone	h6b8	3.999	928.388	15.121	3425.972	6.408
Ctrl MO CO	Clone- Clone	h6b8	3.999	1084.979	36.023	3399.247	6.408
Ctrl MO CO	Clone- Clone	h6b8	3.999	1132.306	59.75	3925.237	6.408
Ctrl MO CO	Clone- Clone	h6b8	3.999	1248.037	105.832	4095	6.408
Ctrl MO CO	Clone- Clone	h6b8	3.999	1412.914	106.759	4095	6.408
Ctrl MO CO	Clone- Clone	h6b8	3.999	1454.281	231.724	4068.7	6.408
Ctrl MO CO	Clone- Clone	h6b8	3.999	1352.506	207.741	4018.675	6.408
Ctrl MO CO	Clone- Clone
Ctrl MO CO	Clone- Clone	h6b9	9.402	561.107	64.46	2632.206	15.2
Ctrl MO CO	Clone- Clone	h6b9	9.402	882.872	106.007	4095	15.2
Ctrl MO CO	Clone- Clone	h6b9	9.402	1056.055	129.03	4095	15.2
Ctrl MO CO	Clone- Clone	h6b9	9.402	1194.458	184.235	4095	15.2
Ctrl MO CO	Clone- Clone	h6b9	9.402	1183.017	158.506	4095	15.2
Ctrl MO CO	Clone- Clone	h6b9	9.402	1061.69	21.316	4095	15.2
Ctrl MO CO	Clone- Clone	h6b9	9.402	1012.448	28.985	4095	15.2
Ctrl MO CO	Clone- Clone
Ctrl MO CO	Clone- Clone	h6b10	10.212	1042.93	113.223	3307.288	16.517
Ctrl MO CO	Clone- Clone	h6b10	10.212	1237.23	195.635	4095	16.517
Ctrl MO CO	Clone- Clone	h6b10	10.212	1192.501	199.72	4095	16.517
Ctrl MO CO	Clone- Clone	h6b10	10.212	1210.153	146.807	4095	16.517
Ctrl MO CO	Clone- Clone	h6b10	10.212	1531.618	133.965	4095	16.517
Ctrl MO CO	Clone- Clone	h6b10	10.212	1491.329	83.642	4095	16.517
Ctrl MO CO	Clone- Clone	h6b10	10.212	1277.771	127.895	4095	16.517
Ctrl MO CO	Clone- Clone	h6b10	10.212	1062.273	131.398	4095	16.517
Ctrl MO CO	Clone- Clone	h6b10	10.212	868.719	97.308	4095	16.517
Ctrl MO CO	Clone- Clone
Ctrl MO CO	Clone- Clone	h6b11	13.022	965.458	67.645	3204.52	21.086
Ctrl MO CO	Clone- Clone	h6b11	13.022	1134.561	111.41	4095	21.086
Ctrl MO CO	Clone- Clone	h6b11	13.022	1077.392	145.651	4095	21.086
Ctrl MO CO	Clone- Clone	h6b11	13.022	1124.064	236.526	4095	21.086
Ctrl MO CO	Clone- Clone	h6b11	13.022	1409.703	211.36	4095	21.086
Ctrl MO CO	Clone- Clone	h6b11	13.022	1655.939	145.262	4095	21.086
Ctrl MO CO	Clone- Clone	h6b11	13.022	1551.263	217.867	4095	21.086
Ctrl MO CO	Clone- Clone	h6b11	13.022	1256.016	197.835	4095	21.086
Ctrl MO CO	Clone- Clone	h6b11	13.022	905.467	179.956	4077.003	21.086
Ctrl MO CO	Clone- Clone
Ctrl MO CO	Clone- Clone	h6b12	9.618	663.57	76.761	2854.698	15.551
Ctrl MO CO	Clone- Clone	h6b12	9.618	894.516	124.635	3808.829	15.551
Ctrl MO CO	Clone- Clone	h6b12	9.618	904.713	84.321	3715.379	15.551
Ctrl MO CO	Clone- Clone	h6b12	9.618	919.313	113.512	3564.698	15.551
Ctrl MO CO	Clone- Clone	h6b12	9.618	979.526	148.099	3391.745	15.551
Ctrl MO CO	Clone- Clone	h6b12	9.618	1079.549	146.476	4091.961	15.551
Ctrl MO CO	Clone- Clone	h6b12	9.618	1086.156	133.881	4051.025	15.551
Ctrl MO CO	Clone- Clone	h6b12	9.618	1031.176	213.346	4095	15.551
Ctrl MO CO	Clone- Clone	h6b12	9.618	1030.462	212.278	3947.423	15.551
Ctrl MO CO	Clone- Clone
Ctrl MO CO	Clone- Clone	h6b13	10.591	359.01	0.118	1633.902	17.132
Ctrl MO CO	Clone- Clone	h6b13	10.591	543.11	0.141	2733.49	17.132
Ctrl MO CO	Clone- Clone	h6b13	10.266	821.405	12.75	3240.731	16.605
Ctrl MO CO	Clone- Clone	h6b13	10.266	614.28	25.056	3618.594	16.605
Ctrl MO CO	Clone- Clone	h6b13	10.266	419.749	64.609	2659.844	16.605
Ctrl MO CO	Clone- Clone	h6b13	10.266	499.588	36.675	2680.798	16.605
Ctrl MO CO	Clone- Clone	h6b13	10.266	592.532	20.978	3027.496	16.605
Ctrl MO CO	Clone- Clone	h7b1	11.888	737.477	39.812	3755.242	19.24
Ctrl MO CO	Clone- Clone	h7b1	11.888	1072.326	12.745	3733.886	19.24
Ctrl MO CO	Clone- Clone	h7b1	11.888	1009.015	6.661	4094.299	19.24
Ctrl MO CO	Clone- Clone	h7b1	11.888	921.299	76.846	4085.087	19.24
Ctrl MO CO	Clone- Clone	h7b1	11.888	902.948	72.586	4093.703	19.24
Ctrl MO CO	Clone- Clone	h7b1	11.888	852.618	124.053	3946.143	19.24
Ctrl MO CO	Clone- Clone	h7b1	11.888	775.232	113.302	4050.091	19.24
Ctrl MO CO	Clone- Clone	h7b1	11.888	716.945	65.582	3404.391	19.24
Ctrl MO CO	Clone- Clone	h7b1	11.888	633.593	36.096	4095	19.24
Ctrl MO CO	Clone- Clone
Ctrl MO CO	Clone- Clone	h7b2	10.05	175.578	0.006	1395.848	16.254
Ctrl MO CO	Clone- Clone	h7b2	10.05	277.206	0.354	2674.872	16.254
Ctrl MO CO	Clone- Clone	h7b2	10.05	320.047	0.289	3002.665	16.254
Ctrl MO CO	Clone- Clone	h7b2	10.05	517.742	14.701	3140.602	16.254
Ctrl MO CO	Clone- Clone	h7b2	12.05	783.775	45.447	4086.205	19.505
Ctrl MO CO	Clone- Clone	h7b2	12.05	896.337	52.407	4095	19.505
Ctrl MO CO	Clone- Clone	h7b2	12.05	880.717	63.078	3821.586	19.505
Ctrl MO CO	Clone- Clone	h7b2	12.05	863.4	64.803	4095	19.505
Ctrl MO CO	Clone- Clone	h7b2	12.05	838.104	36.277	4095	19.505
Ctrl MO CO	Clone- Clone	h7b2	12.05	824.374	14.88	4095	19.505
Ctrl MO CO	Clone- Clone	h7b2	12.05	739.511	8.826	4095	19.505
Ctrl MO CO	Clone- Clone	h8b1	11.942	724.664	24.573	4065.966	19.329
Ctrl MO CO	Clone- Clone	h8b1	11.942	731.767	47.509	4087.733	19.329
Ctrl MO CO	Clone- Clone	h8b1	11.942	881.819	79.948	4024.155	19.329
Ctrl MO CO	Clone- Clone	h8b1	12.752	1461.998	128.461	4095	20.646
Ctrl MO CO	Clone- Clone	h8b1	12.752	1517.068	89.912	4095	20.646
Ctrl MO CO	Clone- Clone	h8b1	12.752	1212.277	97.513	4095	20.646
Ctrl MO CO	Clone- Clone	h8b1	12.752	942.232	53.332	4095	20.646
Ctrl MO CO	Clone- Clone
Ctrl MO CO	Clone- Clone	h8b2	8.862	1087.08	9.994	3818.596	14.321
Ctrl MO CO	Clone- Clone	h8b2	8.862	1360.552	58.799	4085.533	14.321
Ctrl MO CO	Clone- Clone	h8b2	8.862	1135.995	111.092	4093.201	14.321
Ctrl MO CO	Clone- Clone	h8b2	8.862	1073.272	216.162	4095	14.321
Ctrl MO CO	Clone- Clone	h8b2	8.862	1276.808	115.794	3994.952	14.321
Ctrl MO CO	Clone- Clone	h8b2	8.862	1492.616	145.288	4095	14.321
Ctrl MO CO	Clone- Clone	h8b2	8.862	1541.947	177.927	4095	14.321
Ctrl MO CO	Clone- Clone	h8b2	8.862	1224.743	155.091	4077.753	14.321
Ctrl MO CO	Clone- Clone
Ctrl MO CO	Clone- Clone	h8b3	5.025	1436.019	184.398	4095	8.083
Ctrl MO CO	Clone- Clone	h8b3	5.025	2213.158	218.649	4095	8.083
Ctrl MO CO	Clone- Clone	h8b3	5.025	2545.02	175.962	4095	8.083
Ctrl MO CO	Clone- Clone	h8b3	5.025	2476.077	168.305	4095	8.083
Ctrl MO CO	Clone- Clone	h8b3	5.025	1931.988	113.77	4095	8.083
Ctrl MO CO	Clone- Clone	h8b3	5.025	1177.617	112.314	4093.091	8.083
Ctrl MO CO	Clone- Clone
Ctrl MO CO	Clone- Clone	h8b4	5.998	1462.152	115.01	4095	9.664
Ctrl MO CO	Clone- Clone	h8b4	5.998	1597.38	304.746	4095	9.664
Ctrl MO CO	Clone- Clone	h8b4	5.998	2280.732	277.449	4095	9.664
Ctrl MO CO	Clone- Clone	h8b4	5.998	2289.697	411.742	4095	9.664
Ctrl MO CO	Clone- Clone	h8b4	5.998	1996.438	424.505	4095	9.664
Ctrl MO CO	Clone- Clone	h8b4	5.998	1252.125	222.812	4095	9.664
Ctrl MO CO	Clone- Clone
Ctrl MO CO	Clone- Clone	h8b5	8.591	591.722	25.883	3178.728	13.881
Ctrl MO CO	Clone- Clone	h8b5	8.591	760.128	40.06	3560.3	13.881
Ctrl MO CO	Clone- Clone	h8b5	8.591	916.062	26.756	3768.948	13.881
Ctrl MO CO	Clone- Clone	h8b5	8.591	1523.829	134.796	4095	13.881
Ctrl MO CO	Clone- Clone	h8b5	8.591	1739.192	158.309	4095	13.881
Ctrl MO CO	Clone- Clone	h8b5	8.591	1871.442	248.927	4095	13.881
Ctrl MO CO	Clone- Clone	h8b5	8.591	2149.553	238.287	4095	13.881
Ctrl MO CO	Clone- Clone	h8b5	8.591	2444.5	260.6	4095	13.881
Ctrl MO CO	Clone- Clone	h8b5	8.591	2241.097	282.27	4095	13.881
Ctrl MO PO	Non Clone- Clone	h1b1	9.186	777.804	26.187	3984.41	14.848
Ctrl MO PO	Non Clone- Clone	h1b1	9.186	751.217	47.16	4095	14.848
Ctrl MO PO	Non Clone- Clone	h1b1	9.186	732.681	41.444	4095	14.848
Ctrl MO PO	Non Clone- Clone	h1b1	9.186	725.565	55.194	3757.341	14.848
Ctrl MO PO	Non Clone- Clone	h1b1	9.186	778.29	78.766	3766.455	14.848
Ctrl MO PO	Non Clone- Clone	h1b1	9.348	1350.468	127.807	4095	15.112
Ctrl MO PO	Non Clone- Clone	h1b1	9.348	1085.093	88.706	4095	15.112
Ctrl MO PO	Non Clone- Clone	h1b1	9.348	648.926	23.588	2782.252	15.112
Ctrl MO PO	Non Clone- Clone
Ctrl MO PO	Non Clone- Clone	h1b2	10.483	981.54	36.895	2866.797	16.957
Ctrl MO PO	Non Clone- Clone	h1b2	10.483	1074.862	103.826	4095	16.957
Ctrl MO PO	Non Clone- Clone	h1b2	10.483	1008.366	189.37	4095	16.957
Ctrl MO PO	Non Clone- Clone	h1b2	10.483	1225.831	242.898	4095	16.957
Ctrl MO PO	Non Clone- Clone	h1b2	10.483	1620.593	254.166	4095	16.957
Ctrl MO PO	Non Clone- Clone	h1b2	10.483	1886.924	319.925	4095	16.957
Ctrl MO PO	Non Clone- Clone	h1b2	10.483	1682.503	209.552	4095	16.957
Ctrl MO PO	Non Clone- Clone	h1b2	10.483	1508.954	196.993	4095	16.957
Ctrl MO PO	Non Clone- Clone
Ctrl MO PO	Non Clone- Clone	h1b3	10.158	988.506	21.436	3497.406	16.43
Ctrl MO PO	Non Clone- Clone	h1b3	10.158	1023.861	91.092	4095	16.43
Ctrl MO PO	Non Clone- Clone	h1b3	10.158	873.789	64.105	4095	16.43
Ctrl MO PO	Non Clone- Clone	h1b3	10.158	781.823	86.13	3840.812	16.43
Ctrl MO PO	Non Clone- Clone	h1b3	10.158	802.255	68.596	4095	16.43
Ctrl MO PO	Non Clone- Clone	h1b3	10.537	1757.041	115.666	4095	17.044
Ctrl MO PO	Non Clone- Clone	h1b3	10.537	1522.036	130.514	4095	17.044
Ctrl MO PO	Non Clone- Clone	h2b1	8.375	507.634	13.432	2348.408	13.53
Ctrl MO PO	Non Clone- Clone	h2b1	8.375	748.656	48.086	4095	13.53
Ctrl MO PO	Non Clone- Clone	h2b1	8.375	1086.02	106.033	4095	13.53
Ctrl MO PO	Non Clone- Clone	h2b1	8.375	1118.404	106.191	4095	13.53
Ctrl MO PO	Non Clone- Clone	h2b1	8.375	1253.763	111.194	4095	13.53
Ctrl MO PO	Non Clone- Clone	h2b1	8.375	1333.966	54.024	4095	13.53
Ctrl MO PO	Non Clone- Clone	h2b1	8.375	1468.604	229.094	4095	13.53
Ctrl MO PO	Non Clone- Clone	h2b1	8.375	1477.472	300.843	4095	13.53
Ctrl MO PO	Non Clone- Clone
Ctrl MO PO	Non Clone- Clone	h2b2	11.401	1051.234	65.315	4095	18.45
Ctrl MO PO	Non Clone- Clone	h2b2	11.401	1125.836	77.283	4095	18.45
Ctrl MO PO	Non Clone- Clone	h2b2	11.401	1276.649	89.035	4095	18.45
Ctrl MO PO	Non Clone- Clone	h2b2	11.401	1637.712	90.972	4095	18.45
Ctrl MO PO	Non Clone- Clone	h2b2	11.401	1935.685	187.019	4095	18.45
Ctrl MO PO	Non Clone- Clone
Ctrl MO PO	Non Clone- Clone	h2b3	5.89	995.026	118.462	4083.931	9.489
Ctrl MO PO	Non Clone- Clone	h2b3	5.89	1370.11	201.452	4095	9.489
Ctrl MO PO	Non Clone- Clone	h2b3	5.89	1650.358	273.842	4095	9.489
Ctrl MO PO	Non Clone- Clone	h2b3	5.403	2301.978	337.954	4095	8.698
Ctrl MO PO	Non Clone- Clone	h2b3	5.403	2395.974	438.741	4095	8.698
Ctrl MO PO	Non Clone- Clone	h2b3	5.403	1867.906	471.706	4084.491	8.698
Ctrl MO PO	Non Clone- Clone	h2b3	5.403	789.126	125.146	3978.679	8.698
Ctrl MO PO	Non Clone- Clone	h3b1	9.564	959.147	91.08	3806.279	15.463
Ctrl MO PO	Non Clone- Clone	h3b1	9.564	1035.368	56.24	3770.958	15.463
Ctrl MO PO	Non Clone- Clone	h3b1	9.564	1140.023	98.537	4095	15.463
Ctrl MO PO	Non Clone- Clone	h3b1	9.564	1232.812	95.398	4095	15.463
Ctrl MO PO	Non Clone- Clone	h3b1	9.564	1252.087	63.262	4095	15.463
Ctrl MO PO	Non Clone- Clone	h3b1	9.564	1298.191	110.778	4095	15.463
Ctrl MO PO	Non Clone- Clone	h3b1	9.564	1298.729	93.42	4095	15.463
Ctrl MO PO	Non Clone- Clone	h3b1	9.564	1097.811	80.129	4095	15.463
Ctrl MO PO	Non Clone- Clone	h3b1	9.564	920.919	64.55	3270.346	15.463
Ctrl MO PO	Non Clone- Clone
Ctrl MO PO	Non Clone- Clone	h3b2	8.591	1161.589	93.629	3696.69	13.882
Ctrl MO PO	Non Clone- Clone	h3b2	8.591	1278.758	134.236	4091.396	13.882
Ctrl MO PO	Non Clone- Clone	h3b2	8.591	1832.392	170.89	4095	13.882
Ctrl MO PO	Non Clone- Clone	h3b2	8.591	2085.28	135.377	4095	13.882
Ctrl MO PO	Non Clone- Clone	h3b2	8.591	2089.537	184.016	4095	13.882
Ctrl MO PO	Non Clone- Clone	h3b2	8.591	2068.37	260.458	4095	13.882
Ctrl MO PO	Non Clone- Clone	h3b2	8.591	1476.919	267.196	4095	13.882
Ctrl MO PO	Non Clone- Clone	h3b2	8.591	591.473	190.843	1602.126	13.882
Ctrl MO PO	Non Clone- Clone
Ctrl MO PO	Non Clone- Clone	h3b3	9.942	907.538	25.086	4030.665	16.078
Ctrl MO PO	Non Clone- Clone	h3b3	9.942	1027.634	41.812	4095	16.078
Ctrl MO PO	Non Clone- Clone	h3b3	9.942	1016.251	79.708	4095	16.078
Ctrl MO PO	Non Clone- Clone	h3b3	9.942	1343.054	200.851	4095	16.078
Ctrl MO PO	Non Clone- Clone	h3b3	9.942	1805.297	240.769	4095	16.078
Ctrl MO PO	Non Clone- Clone	h3b3	9.942	2110.306	283.981	4095	16.078
Ctrl MO PO	Non Clone- Clone	h3b3	9.942	2338.661	208.026	4095	16.078
Ctrl MO PO	Non Clone- Clone	h3b3	9.942	1966.043	312.756	4095	16.078
Ctrl MO PO	Non Clone- Clone	h3b3	9.942	1268.411	104.543	4095	16.078
Ctrl MO PO	Non Clone- Clone	h5b1	17.237	1235.942	115.864	4077.024	27.929
Ctrl MO PO	Non Clone- Clone	h5b1	17.237	1504.01	126.868	4095	27.929
Ctrl MO PO	Non Clone- Clone	h5b1	17.237	1492.513	110.002	4095	27.929
Ctrl MO PO	Non Clone- Clone	h5b1	17.237	1620.073	89.395	4095	27.929
Ctrl MO PO	Non Clone- Clone	h5b1	17.237	1608.066	84.254	4095	27.929
Ctrl MO PO	Non Clone- Clone	h5b1	17.237	1343.46	103.083	4095	27.929
Ctrl MO PO	Non Clone- Clone	h5b1	17.237	1250.379	115.008	4095	27.929
Ctrl MO PO	Non Clone- Clone	h5b1	16.751	2076.115	136.996	4095	27.148
Ctrl MO PO	Non Clone- Clone	h5b1	16.751	1803.579	157.792	4095	27.148
Ctrl MO PO	Non Clone- Clone	h5b1	16.751	1464.329	127.689	4095	27.148
Ctrl MO PO	Non Clone- Clone
Ctrl MO PO	Non Clone- Clone	h5b2	10.266	1512.231	139.125	4086.763	16.605
Ctrl MO PO	Non Clone- Clone	h5b2	10.266	1750.979	174.543	4017.619	16.605
Ctrl MO PO	Non Clone- Clone	h5b2	10.266	1726.561	234.701	4092.94	16.605
Ctrl MO PO	Non Clone- Clone	h5b2	10.266	1890.006	218.435	4095	16.605
Ctrl MO PO	Non Clone- Clone	h5b2	10.266	2297.039	271.936	4095	16.605
Ctrl MO PO	Non Clone- Clone	h5b2	10.266	1688.98	294.386	4095	16.605
Ctrl MO PO	Non Clone- Clone	h5b2	10.266	1420.363	281.58	4095	16.605
Ctrl MO PO	Non Clone- Clone	h5b2	10.266	1619.815	140.813	4095	16.605
Ctrl MO PO	Non Clone- Clone
Ctrl MO PO	Non Clone- Clone	h5b3	10.753	1059.397	10.264	4076.164	17.396
Ctrl MO PO	Non Clone- Clone	h5b3	10.753	905.047	35.384	4095	17.396
Ctrl MO PO	Non Clone- Clone	h5b3	10.753	803.393	28.127	4095	17.396
Ctrl MO PO	Non Clone- Clone	h5b3	10.753	747.509	49.434	4095	17.396
Ctrl MO PO	Non Clone- Clone	h5b3	10.591	1923.354	128.633	4095	17.132
Ctrl MO PO	Non Clone- Clone	h5b3	10.591	1563.888	64.977	4095	17.132
Ctrl MO PO	Non Clone- Clone	h5b3	11.401	2048.711	188.028	4095	18.45
Ctrl MO PO	Non Clone- Clone	h5b3	11.401	1714.583	220.498	4095	18.45
Ctrl MO PO	Non Clone- Clone	h5b3	11.401	1514.084	283.583	4095	18.45
Ctrl MO PO	Non Clone- Clone	h5b3	11.401	1439.438	210.102	4095	18.45
Ctrl MO PO	Non Clone- Clone	h6b1	4.431	998.541	52.458	4093.832	7.116
Ctrl MO PO	Non Clone- Clone	h6b1	4.431	1015.146	121.249	4095	7.116
Ctrl MO PO	Non Clone- Clone	h6b1	4.431	1046.561	133.631	4094.709	7.116
Ctrl MO PO	Non Clone- Clone	h6b1	4.431	1213.264	167.374	4095	7.116
Ctrl MO PO	Non Clone- Clone	h6b1	4.431	1389.868	189.267	4095	7.116
Ctrl MO PO	Non Clone- Clone	h6b1	4.431	1165.706	231.614	4090.816	7.116
Ctrl MO PO	Non Clone- Clone	h6b1	4.431	1012.329	255.044	3371.671	7.116
Ctrl MO PO	Non Clone- Clone
Ctrl MO PO	Non Clone- Clone	h6b2	10.212	1212.295	98.676	4095	16.517
Ctrl MO PO	Non Clone- Clone	h6b2	10.212	1161.711	157.9	4095	16.517
Ctrl MO PO	Non Clone- Clone	h6b2	10.212	1243.906	151.736	4095	16.517
Ctrl MO PO	Non Clone- Clone	h6b2	10.212	1500.697	194.093	4093.683	16.517
Ctrl MO PO	Non Clone- Clone	h6b2	10.212	1395.703	206.133	4095	16.517
Ctrl MO PO	Non Clone- Clone	h6b2	10.212	1307.616	134.751	4095	16.517
Ctrl MO PO	Non Clone- Clone	h6b2	10.212	1282.16	89.93	4094.118	16.517
Ctrl MO PO	Non Clone- Clone
Ctrl MO PO	Non Clone- Clone	h6b3	11.347	1172.151	47.982	4095	18.362
Ctrl MO PO	Non Clone- Clone	h6b3	11.347	1131.725	37.306	4095	18.362
Ctrl MO PO	Non Clone- Clone	h6b3	11.347	978.667	27.775	4095	18.362
Ctrl MO PO	Non Clone- Clone	h6b3	11.347	879.381	28.159	4095	18.362
Ctrl MO PO	Non Clone- Clone	h6b3	11.347	997.094	96.09	4095	18.362
Ctrl MO PO	Non Clone- Clone	h6b3	11.347	1157.272	63.06	4095	18.362
Ctrl MO PO	Non Clone- Clone	h6b3	11.347	1158.049	87.733	4087.503	18.362
Ctrl MO PO	Non Clone- Clone	h6b3	11.347	1172.842	89.39	4095	18.362
Ctrl MO PO	Non Clone- Clone	h6b3	11.347	1123.776	104.684	4095	18.362
Ctrl MO PO	Non Clone- Clone	h6b3	11.347	980.798	55.989	4095	18.362
Ctrl MO PO	Non Clone- Clone
Ctrl MO PO	Non Clone- Clone	h6b4	6.646	823.3	56.782	2727.354	10.719
Ctrl MO PO	Non Clone- Clone	h6b4	6.646	1017.985	55.766	3866.861	10.719
Ctrl MO PO	Non Clone- Clone	h6b4	6.646	924.619	66.562	4067.531	10.719
Ctrl MO PO	Non Clone- Clone	h6b4	6.646	857.363	94.613	4095	10.719
Ctrl MO PO	Non Clone- Clone	h6b4	6.646	1059.119	112.661	4095	10.719
Ctrl MO PO	Non Clone- Clone	h6b4	6.646	1484.561	147.707	4095	10.719
Ctrl MO PO	Non Clone- Clone	h6b4	6.646	1575.627	141.643	4095	10.719
Ctrl MO PO	Non Clone- Clone	h6b4	6.646	1578.342	225.058	4095	10.719
Ctrl MO PO	Non Clone- Clone	h6b4	6.646	1438.43	251.948	4095	10.719
Ctrl MO PO	Non Clone- Clone	h6b4	6.646	1155.543	206.418	3151.475	10.719
Ctrl MO PO	Non Clone- Clone	h7b1	5.511	688.205	6.534	4095	8.874
Ctrl MO PO	Non Clone- Clone	h7b1	5.511	882.441	21.56	4095	8.874
Ctrl MO PO	Non Clone- Clone	h7b1	5.511	849.581	43.16	4095	8.874
Ctrl MO PO	Non Clone- Clone	h7b1	5.511	828.305	22.735	4095	8.874
Ctrl MO PO	Non Clone- Clone	h7b1	5.511	832.036	28.714	4003.538	8.874
Ctrl MO PO	Non Clone- Clone	h8b1	10.321	873.893	73.722	4095	16.693
Ctrl MO PO	Non Clone- Clone	h8b1	10.321	1074.572	90.871	4095	16.693
Ctrl MO PO	Non Clone- Clone	h8b1	10.321	1246.788	109.891	4095	16.693
Ctrl MO PO	Non Clone- Clone	h8b1	10.321	1253.711	198.784	4095	16.693
Ctrl MO PO	Non Clone- Clone	h8b1	10.321	1317.208	166.783	4095	16.693
Ctrl MO PO	Non Clone- Clone	h8b1	10.321	1521.119	153.48	4095	16.693
Ctrl MO PO	Non Clone- Clone	h8b1	10.321	1860.39	274.211	4095	16.693
Ctrl MO PO	Non Clone- Clone	h8b1	10.321	1891.597	191.118	4095	16.693
Ctrl MO PO	Non Clone- Clone
Ctrl MO PO	Non Clone- Clone	h8b2	8.645	1331.184	27.719	4079.39	13.97
Ctrl MO PO	Non Clone- Clone	h8b2	8.645	1114.586	46.147	4095	13.97
Ctrl MO PO	Non Clone- Clone	h8b2	8.645	817.524	136.275	4095	13.97
Ctrl MO PO	Non Clone- Clone	h8b2	8.7	1466.471	207.31	4095	14.057
Ctrl MO PO	Non Clone- Clone	h8b2	8.7	1652.319	409.777	4095	14.057
Ctrl MO PO	Non Clone- Clone	h8b2	8.7	1858.034	366.177	4095	14.057
Ctrl MO PO	Non Clone- Clone	h8b2	8.7	1608.47	171.239	4095	14.057
Ctrl MO PO	Non Clone- Clone	h8b2	8.7	987.459	76.058	4095	14.057
Ctrl MO PO	Non Clone- Clone
Ctrl MO PO	Non Clone- Clone	h8b3	12.374	544.515	44.197	2435.576	20.032
Ctrl MO PO	Non Clone- Clone	h8b3	12.374	736.193	11.889	3549.098	20.032
Ctrl MO PO	Non Clone- Clone	h8b3	12.374	919.72	36.395	4056.565	20.032
Ctrl MO PO	Non Clone- Clone	h8b3	12.374	1039.343	63.669	4089.195	20.032
Ctrl MO PO	Non Clone- Clone	h8b3	12.374	1125.8	137.667	4095	20.032
Ctrl MO PO	Non Clone- Clone	h8b3	12.374	1157.395	134.962	4095	20.032
Ctrl MO PO	Non Clone- Clone	h8b3	12.374	1308.292	95.27	4095	20.032
Ctrl MO PO	Non Clone- Clone	h8b3	12.374	1583.222	121.311	4095	20.032
Ctrl MO PO	Non Clone- Clone
Ctrl MO PO	Non Clone- Clone	h8b4	8.375	1197.447	31.684	3985.133	13.53
Ctrl MO PO	Non Clone- Clone	h8b4	8.375	1461.864	30.675	4095	13.53
Ctrl MO PO	Non Clone- Clone	h8b4	8.375	1281.09	29.468	4095	13.53
Ctrl MO PO	Non Clone- Clone	h8b4	8.375	963.483	155.709	3997.372	13.53
Ctrl MO PO	Non Clone- Clone	h8b4	8.375	928.222	128.02	3562.872	13.53
Ctrl MO PO	Non Clone- Clone	h8b4	9.186	1407.592	112.831	4095	14.847
Ctrl MO PO	Non Clone- Clone	h8b4	9.186	1508.332	312.27	4093.543	14.847
Ctrl MO PO	Non Clone- Clone	h8b4	9.186	1391.472	282.771	4076.479	14.847
Ctrl MO PO	Non Clone- Clone	h8b4	9.186	1319.689	239.935	4095	14.847
Ctrl MO NO	Non Clone- Non Clone	h1b1	16.102	991.808	90.751	4023.594	26.094
Ctrl MO NO	Non Clone- Non Clone	h1b1	16.102	1169.601	139.726	4095	26.094
Ctrl MO NO	Non Clone- Non Clone	h1b1	16.102	1306.819	207.766	4095	26.094
Ctrl MO NO	Non Clone- Non Clone	h1b1	16.21	1696.265	155.944	4095	26.27
Ctrl MO NO	Non Clone- Non Clone	h1b1	16.21	2113.895	132.507	4095	26.27
Ctrl MO NO	Non Clone- Non Clone	h1b1	16.21	2092.474	226.602	4095	26.27
Ctrl MO NO	Non Clone- Non Clone	h1b1	16.21	1414.462	230.641	4095	26.27
Ctrl MO NO	Non Clone- Non Clone
Ctrl MO NO	Non Clone- Non Clone	h1b2	11.888	985.759	58.386	4043.287	19.241
Ctrl MO NO	Non Clone- Non Clone	h1b2	11.888	996.139	104.785	4095	19.241
Ctrl MO NO	Non Clone- Non Clone	h1b2	11.888	1082.094	82.095	4095	19.241
Ctrl MO NO	Non Clone- Non Clone	h1b2	11.888	1235.865	99.02	4095	19.241
Ctrl MO NO	Non Clone- Non Clone	h1b2	11.888	1507.305	127.973	4095	19.241
Ctrl MO NO	Non Clone- Non Clone	h1b2	11.888	2036.887	172.742	4095	19.241
Ctrl MO NO	Non Clone- Non Clone	h1b2	11.888	1768.635	218.16	4095	19.241
Ctrl MO NO	Non Clone- Non Clone	h1b2	11.888	1501.287	184.731	4095	19.241
Ctrl MO NO	Non Clone- Non Clone
Ctrl MO NO	Non Clone- Non Clone	h1b3	10.915	344.575	4.952	1060.544	17.659
Ctrl MO NO	Non Clone- Non Clone	h1b3	10.915	774.129	14.948	2379.041	17.659
Ctrl MO NO	Non Clone- Non Clone	h1b3	10.915	856.719	55.024	4005.851	17.659
Ctrl MO NO	Non Clone- Non Clone	h1b3	10.915	766.923	44.176	4038.928	17.659
Ctrl MO NO	Non Clone- Non Clone	h1b3	10.915	797.95	43.716	4095	17.659
Ctrl MO NO	Non Clone- Non Clone	h1b3	10.915	888.485	42.511	4095	17.659
Ctrl MO NO	Non Clone- Non Clone	h1b3	10.915	733.492	57.838	4095	17.659
Ctrl MO NO	Non Clone- Non Clone
Ctrl MO NO	Non Clone- Non Clone	h1b4	9.456	418.839	36.343	1526.044	15.287
Ctrl MO NO	Non Clone- Non Clone	h1b4	9.456	749.495	91.321	3459.718	15.287
Ctrl MO NO	Non Clone- Non Clone	h1b4	9.456	972.621	153.211	4095	15.287
Ctrl MO NO	Non Clone- Non Clone	h1b4	9.456	1171.573	146.141	4095	15.287
Ctrl MO NO	Non Clone- Non Clone	h1b4	9.456	1423.539	171.775	4095	15.287
Ctrl MO NO	Non Clone- Non Clone	h1b4	9.456	1641.078	160.372	4095	15.287
Ctrl MO NO	Non Clone- Non Clone	h1b4	9.456	1256.274	137.654	4095	15.287
Ctrl MO NO	Non Clone- Non Clone
Ctrl MO NO	Non Clone- Non Clone	h1b5	11.455	323.849	3.527	1363.996	18.537
Ctrl MO NO	Non Clone- Non Clone	h1b5	11.455	583.279	35.762	2817.283	18.537
Ctrl MO NO	Non Clone- Non Clone	h1b5	11.455	616.13	60.013	3005.238	18.537
Ctrl MO NO	Non Clone- Non Clone	h1b5	11.455	657.598	53.284	3798.158	18.537
Ctrl MO NO	Non Clone- Non Clone	h1b5	11.455	737.675	44.582	4095	18.537
Ctrl MO NO	Non Clone- Non Clone	h1b5	11.455	1018.068	82.355	4095	18.537
Ctrl MO NO	Non Clone- Non Clone	h1b5	11.455	1389.935	92.924	4095	18.537
Ctrl MO NO	Non Clone- Non Clone	h1b5	11.455	1412.508	55.199	4095	18.537
Ctrl MO NO	Non Clone- Non Clone	h1b5	11.455	1339.299	78.077	4095	18.537
Ctrl MO NO	Non Clone- Non Clone	h1b5	11.455	1122.68	156.894	4095	18.537
Ctrl MO NO	Non Clone- Non Clone	h1b5	11.455	757.122	73.581	4095	18.537
Ctrl MO NO	Non Clone- Non Clone
Ctrl MO NO	Non Clone- Non Clone	h1b6	9.834	502.794	12.928	1496.065	15.902
Ctrl MO NO	Non Clone- Non Clone	h1b6	9.834	669.931	38.952	2923.779	15.902
Ctrl MO NO	Non Clone- Non Clone	h1b6	9.834	584.533	19.781	3000.312	15.902
Ctrl MO NO	Non Clone- Non Clone	h1b6	9.834	550.966	47.316	2338.593	15.902
Ctrl MO NO	Non Clone- Non Clone	h1b6	9.834	556.598	18.363	2989.379	15.902
Ctrl MO NO	Non Clone- Non Clone	h1b6	10.375	809.368	14.666	4095	16.781
Ctrl MO NO	Non Clone- Non Clone	h1b6	10.375	806.068	36.707	4095	16.781
Ctrl MO NO	Non Clone- Non Clone	h1b6	10.375	686.279	40.358	4095	16.781
Ctrl MO NO	Non Clone- Non Clone
Ctrl MO NO	Non Clone- Non Clone	h1b7	11.455	305.679	2.11	1187.042	18.538
Ctrl MO NO	Non Clone- Non Clone	h1b7	11.455	691.933	10.825	4070.745	18.538
Ctrl MO NO	Non Clone- Non Clone	h1b7	11.455	696.142	32.531	4095	18.538
Ctrl MO NO	Non Clone- Non Clone	h1b7	11.455	661.679	36.684	4095	18.538
Ctrl MO NO	Non Clone- Non Clone	h1b7	11.455	705.687	97.575	4095	18.538
Ctrl MO NO	Non Clone- Non Clone	h1b7	11.455	990.403	38.781	4095	18.538
Ctrl MO NO	Non Clone- Non Clone	h1b7	11.509	1968.71	161.965	4095	18.626
Ctrl MO NO	Non Clone- Non Clone	h1b7	11.509	1899.482	163	4095	18.626
Ctrl MO NO	Non Clone- Non Clone	h1b7	11.509	1477.746	69.737	4094.833	18.626
Ctrl MO NO	Non Clone- Non Clone	h1b7	11.509	955.409	97.515	4095	18.626
Ctrl MO NO	Non Clone- Non Clone	h2b1	12.212	786.647	55.933	2899.186	19.768
Ctrl MO NO	Non Clone- Non Clone	h2b1	12.212	1030.779	75.636	4095	19.768
Ctrl MO NO	Non Clone- Non Clone	h2b1	12.212	1196.414	110.893	4095	19.768
Ctrl MO NO	Non Clone- Non Clone	h2b1	12.212	1571.968	113.335	4095	19.768
Ctrl MO NO	Non Clone- Non Clone	h2b1	12.212	1620.161	145.353	4095	19.768
Ctrl MO NO	Non Clone- Non Clone	h2b1	12.212	1696.878	157.378	4095	19.768
Ctrl MO NO	Non Clone- Non Clone	h2b1	12.212	1674.087	151.282	4095	19.768
Ctrl MO NO	Non Clone- Non Clone	h2b1	12.212	1657.482	227.734	4095	19.768
Ctrl MO NO	Non Clone- Non Clone
Ctrl MO NO	Non Clone- Non Clone	h2b2	12.806	997.504	99.227	3199.421	20.734
Ctrl MO NO	Non Clone- Non Clone	h2b2	12.806	1005.463	175.362	2680.359	20.734
Ctrl MO NO	Non Clone- Non Clone	h2b2	12.806	1250.221	221.074	3592.401	20.734
Ctrl MO NO	Non Clone- Non Clone	h2b2	12.806	1412.218	182.908	3797.143	20.734
Ctrl MO NO	Non Clone- Non Clone	h2b2	12.806	1735.642	102.604	4095	20.734
Ctrl MO NO	Non Clone- Non Clone	h2b2	12.806	1881.834	35.813	4095	20.734
Ctrl MO NO	Non Clone- Non Clone	h2b2	12.806	1293.717	26.808	4095	20.734
Ctrl MO NO	Non Clone- Non Clone
Ctrl MO NO	Non Clone- Non Clone	h2b3	9.564	754.794	56.152	2890.162	15.463
Ctrl MO NO	Non Clone- Non Clone	h2b3	9.564	850.805	109.961	3337.752	15.463
Ctrl MO NO	Non Clone- Non Clone	h2b3	9.564	1041.886	151.905	3982.828	15.463
Ctrl MO NO	Non Clone- Non Clone	h2b3	9.564	1163.158	79.073	4020.071	15.463
Ctrl MO NO	Non Clone- Non Clone	h2b3	9.564	1390.899	93.594	4095	15.463
Ctrl MO NO	Non Clone- Non Clone	h2b3	9.564	1506.491	129.916	4095	15.463
Ctrl MO NO	Non Clone- Non Clone	h2b3	9.564	1314.165	55.285	4095	15.463
Ctrl MO NO	Non Clone- Non Clone
Ctrl MO NO	Non Clone- Non Clone	h2b4	10.861	977.488	32.434	4095	17.572
Ctrl MO NO	Non Clone- Non Clone	h2b4	10.861	1007.35	55.812	4095	17.572
Ctrl MO NO	Non Clone- Non Clone	h2b4	10.861	936.162	82.391	4049.971	17.572
Ctrl MO NO	Non Clone- Non Clone	h2b4	10.915	1529.861	98.049	4095	17.659
Ctrl MO NO	Non Clone- Non Clone	h2b4	10.915	1626.013	134.051	4095	17.659
Ctrl MO NO	Non Clone- Non Clone	h2b4	11.833	2128.835	346.573	4095	19.153
Ctrl MO NO	Non Clone- Non Clone	h2b4	11.833	1833.985	336.855	4095	19.153
Ctrl MO NO	Non Clone- Non Clone	h2b4	11.833	1146.111	196.493	4095	19.153
Ctrl MO NO	Non Clone- Non Clone	h3b1	6.646	734.165	72.621	2417.218	10.719
Ctrl MO NO	Non Clone- Non Clone	h3b1	6.646	951.924	74.139	3153.221	10.719
Ctrl MO NO	Non Clone- Non Clone	h3b1	6.646	964.177	158.169	3540.984	10.719
Ctrl MO NO	Non Clone- Non Clone	h3b1	6.646	1399.004	224.69	4095	10.719
Ctrl MO NO	Non Clone- Non Clone	h3b1	6.646	1782.976	129.006	4095	10.719
Ctrl MO NO	Non Clone- Non Clone	h3b1	6.646	2091.873	113.555	4095	10.719
Ctrl MO NO	Non Clone- Non Clone	h3b1	6.646	2272.642	136.485	4095	10.719
Ctrl MO NO	Non Clone- Non Clone	h3b1	6.646	2201.972	194.794	4095	10.719
Ctrl MO NO	Non Clone- Non Clone	h3b1	6.646	1509.354	203.782	4095	10.719
Ctrl MO NO	Non Clone- Non Clone
Ctrl MO NO	Non Clone- Non Clone	h3b2	10.915	435.961	7.052	2215.944	17.659
Ctrl MO NO	Non Clone- Non Clone	h3b2	10.915	506.152	7.362	2901.549	17.659
Ctrl MO NO	Non Clone- Non Clone	h3b2	10.915	446.384	9.807	2981.202	17.659
Ctrl MO NO	Non Clone- Non Clone	h3b2	10.915	392.878	48.702	3918.396	17.659
Ctrl MO NO	Non Clone- Non Clone	h3b2	10.915	415.918	30.23	4095	17.659
Ctrl MO NO	Non Clone- Non Clone	h3b2	11.563	1716.004	161.661	4095	18.713
Ctrl MO NO	Non Clone- Non Clone	h3b2	11.563	1972.712	203.039	4095	18.713
Ctrl MO NO	Non Clone- Non Clone	h3b2	11.563	2047.789	291.175	4095	18.713
Ctrl MO NO	Non Clone- Non Clone	h3b2	11.563	1328.469	198.466	4095	18.713
Ctrl MO NO	Non Clone- Non Clone	h3b2	11.563	1037.732	200.303	4076.405	18.713
Ctrl MO NO	Non Clone- Non Clone
Ctrl MO NO	Non Clone- Non Clone	h3b3	8.808	794.142	43.434	2147.627	14.231
Ctrl MO NO	Non Clone- Non Clone	h3b3	8.808	911.827	69.441	2981.871	14.231
Ctrl MO NO	Non Clone- Non Clone	h3b3	8.808	1154.229	212.494	4095	14.231
Ctrl MO NO	Non Clone- Non Clone	h3b3	8.808	1292.133	258.784	4095	14.231
Ctrl MO NO	Non Clone- Non Clone	h3b3	8.808	1394.519	301.029	4095	14.231
Ctrl MO NO	Non Clone- Non Clone	h3b3	8.808	1453.571	232.795	4095	14.231
Ctrl MO NO	Non Clone- Non Clone	h3b3	8.808	1256.352	155.48	4064.854	14.231
Ctrl MO NO	Non Clone- Non Clone	h5b1	9.942	1340.725	54.842	4095	16.078
Ctrl MO NO	Non Clone- Non Clone	h5b1	9.942	1384.683	46.835	4095	16.078
Ctrl MO NO	Non Clone- Non Clone	h5b1	9.942	1355.146	93.637	4095	16.078
Ctrl MO NO	Non Clone- Non Clone	h5b1	9.942	1326.614	128.163	4095	16.078
Ctrl MO NO	Non Clone- Non Clone	h5b1	9.942	1327.129	157.295	4095	16.078
Ctrl MO NO	Non Clone- Non Clone	h5b1	9.78	1696.823	285.785	4095	15.814
Ctrl MO NO	Non Clone- Non Clone	h5b1	9.78	1260.149	207.165	4095	15.814
Ctrl MO NO	Non Clone- Non Clone	h5b1	9.78	933.22	89.573	4095	15.814
Ctrl MO NO	Non Clone- Non Clone	h5b1	9.78	778.944	36.097	4033.259	15.814
Ctrl MO NO	Non Clone- Non Clone	h5b1	9.78	671.886	15.144	4094.542	15.814
Ctrl MO NO	Non Clone- Non Clone
Ctrl MO NO	Non Clone- Non Clone	h5b2	7.295	503.184	33.825	3629.198	11.773
Ctrl MO NO	Non Clone- Non Clone	h5b2	7.295	763.526	37.73	4095	11.773
Ctrl MO NO	Non Clone- Non Clone	h5b2	7.295	534.89	32.11	4095	11.773
Ctrl MO NO	Non Clone- Non Clone	h5b2	7.295	484.252	37.487	3983.327	11.773
Ctrl MO NO	Non Clone- Non Clone	h5b2	7.241	1091.89	70.157	4095	11.685
Ctrl MO NO	Non Clone- Non Clone	h5b2	7.241	1066.922	26.565	4095	11.685
Ctrl MO NO	Non Clone- Non Clone	h5b2	7.241	931.571	132.38	4095	11.685
Ctrl MO NO	Non Clone- Non Clone	h5b2	7.241	954.111	81.762	4086.935	11.685
Ctrl MO NO	Non Clone- Non Clone	h5b2	7.241	922.472	157.023	4095	11.685
Ctrl MO NO	Non Clone- Non Clone
Ctrl MO NO	Non Clone- Non Clone	h5b3	9.888	1602.378	74.076	4095	15.99
Ctrl MO NO	Non Clone- Non Clone	h5b3	9.888	1563.148	63.753	4095	15.99
Ctrl MO NO	Non Clone- Non Clone	h5b3	9.888	1585.133	94.617	4095	15.99
Ctrl MO NO	Non Clone- Non Clone	h5b3	9.888	1674.329	100.05	4095	15.99
Ctrl MO NO	Non Clone- Non Clone	h5b3	9.888	1610.023	53.298	4095	15.99
Ctrl MO NO	Non Clone- Non Clone	h5b3	9.888	1120.905	109.202	4095	15.99
Ctrl MO NO	Non Clone- Non Clone	h5b3	9.888	840.097	77.175	4083.99	15.99
Ctrl MO NO	Non Clone- Non Clone	h5b3	9.888	756.41	87.241	4086.542	15.99
Ctrl MO NO	Non Clone- Non Clone	h5b3	9.888	820.155	106.151	3896.078	15.99
Ctrl MO NO	Non Clone- Non Clone	h5b3	9.888	1007.991	177.474	3823.485	15.99
Ctrl MO NO	Non Clone- Non Clone
Ctrl MO NO	Non Clone- Non Clone	h5b4	9.618	1370.866	82.609	3891.86	15.504
Ctrl MO NO	Non Clone- Non Clone	h5b4	9.618	1231.481	112.102	4095	15.504
Ctrl MO NO	Non Clone- Non Clone	h5b4	9.618	1046.347	45.634	4095	15.504
Ctrl MO NO	Non Clone- Non Clone	h5b4	9.618	961.472	68.155	4095	15.504
Ctrl MO NO	Non Clone- Non Clone	h5b4	9.618	860.938	85.716	4078.2	15.504
Ctrl MO NO	Non Clone- Non Clone	h5b4	9.618	623.451	96.162	2592.578	15.504
Ctrl MO NO	Non Clone- Non Clone	h5b4	9.618	979.688	202.171	3520.438	15.504
Ctrl MO NO	Non Clone- Non Clone	h5b4	9.618	1206.992	147.02	3848.562	15.504
Ctrl MO NO	Non Clone- Non Clone
Ctrl MO NO	Non Clone- Non Clone	h5b5	10.266	482.055	10.8	1647.07	16.605
Ctrl MO NO	Non Clone- Non Clone	h5b5	10.266	1086.056	11.749	3936.474	16.605
Ctrl MO NO	Non Clone- Non Clone	h5b5	10.266	1234.07	24.043	4095	16.605
Ctrl MO NO	Non Clone- Non Clone	h5b5	10.266	1251.972	35.178	4095	16.605
Ctrl MO NO	Non Clone- Non Clone	h5b5	10.266	1307.783	66.85	4095	16.605
Ctrl MO NO	Non Clone- Non Clone	h5b5	10.266	1499.648	137.766	4095	16.605
Ctrl MO NO	Non Clone- Non Clone	h5b5	9.942	2119.573	271.557	4095	16.078
Ctrl MO NO	Non Clone- Non Clone	h5b5	9.942	1847.551	159.499	4095	16.078
Ctrl MO NO	Non Clone- Non Clone	h5b5	9.942	1590.589	177.852	4095	16.078
Ctrl MO NO	Non Clone- Non Clone	h5b5	9.942	1554.621	163.045	4095	16.078
Ctrl MO NO	Non Clone- Non Clone	h5b5	9.942	1539.458	70.425	4095	16.078
Ctrl MO NO	Non Clone- Non Clone	h5b5	9.942	1333.832	36.067	4094.955	16.078
Ctrl MO NO	Non Clone- Non Clone	h5b5	9.942	1102.927	24.825	4093.817	16.078
Ctrl MO NO	Non Clone- Non Clone
Ctrl MO NO	Non Clone- Non Clone	h5b6	4.593	619.088	17.932	3839.639	7.38
Ctrl MO NO	Non Clone- Non Clone	h5b6	4.593	1009.683	19.778	4095	7.38
Ctrl MO NO	Non Clone- Non Clone	h5b6	4.593	1098.016	60.818	4095	7.38
Ctrl MO NO	Non Clone- Non Clone	h5b6	4.593	1221.445	56.326	4095	7.38
Ctrl MO NO	Non Clone- Non Clone	h5b6	4.593	1227.365	164.266	4095	7.38
Ctrl MO NO	Non Clone- Non Clone	h5b6	5.62	1502.599	356.76	4095	9.049
Ctrl MO NO	Non Clone- Non Clone	h5b6	5.62	1983.726	326.954	4095	9.049
Ctrl MO NO	Non Clone- Non Clone	h5b6	5.62	2323.152	458.264	4095	9.049
Ctrl MO NO	Non Clone- Non Clone	h5b6	5.62	2183.452	287.799	4095	9.049
Ctrl MO NO	Non Clone- Non Clone	h5b6	5.62	1772	116.399	4095	9.049
Ctrl MO NO	Non Clone- Non Clone	h6b1	9.456	460.373	15.403	2220.992	15.287
Ctrl MO NO	Non Clone- Non Clone	h6b1	9.456	740.208	54.779	3384.554	15.287
Ctrl MO NO	Non Clone- Non Clone	h6b1	9.456	906.281	72.559	4077.59	15.287
Ctrl MO NO	Non Clone- Non Clone	h6b1	9.456	1076.118	91.213	4081.986	15.287
Ctrl MO NO	Non Clone- Non Clone	h6b1	9.456	1212.482	108.425	4090.027	15.287
Ctrl MO NO	Non Clone- Non Clone	h6b1	9.456	1169.14	134.131	4095	15.287
Ctrl MO NO	Non Clone- Non Clone	h6b1	9.456	1132.958	137.874	4095	15.287
Ctrl MO NO	Non Clone- Non Clone	h6b1	9.456	1075.298	134.902	4095	15.287
Ctrl MO NO	Non Clone- Non Clone
Ctrl MO NO	Non Clone- Non Clone	h6b2	12.482	880.261	32.278	3940.032	20.208
Ctrl MO NO	Non Clone- Non Clone	h6b2	12.482	1049.273	42.019	4095	20.208
Ctrl MO NO	Non Clone- Non Clone	h6b2	12.482	971.47	71.269	4095	20.208
Ctrl MO NO	Non Clone- Non Clone	h6b2	12.482	930.668	79.141	4095	20.208
Ctrl MO NO	Non Clone- Non Clone	h6b2	12.482	1096.308	112.091	4095	20.208
Ctrl MO NO	Non Clone- Non Clone	h6b2	12.482	1253.136	87.94	4095	20.208
Ctrl MO NO	Non Clone- Non Clone	h6b2	12.482	1256.851	116.348	4095	20.208
Ctrl MO NO	Non Clone- Non Clone	h6b2	12.482	1177.095	137.755	4095	20.208
Ctrl MO NO	Non Clone- Non Clone	h6b2	12.482	967.823	104.078	4089.056	20.208
Ctrl MO NO	Non Clone- Non Clone
Ctrl MO NO	Non Clone- Non Clone	h6b3	8.159	916.921	22.292	4095	13.144
Ctrl MO NO	Non Clone- Non Clone	h6b3	8.159	930.495	30.704	4095	13.144
Ctrl MO NO	Non Clone- Non Clone	h6b3	8.159	853.854	46.491	4095	13.144
Ctrl MO NO	Non Clone- Non Clone	h6b3	8.159	885.438	152.356	4089.882	13.144
Ctrl MO NO	Non Clone- Non Clone	h6b3	8.159	1065.632	102.425	3691.598	13.144
Ctrl MO NO	Non Clone- Non Clone	h6b3	8.159	1158.057	89.368	3711.557	13.144
Ctrl MO NO	Non Clone- Non Clone	h6b3	8.159	1253.389	150.815	4065.956	13.144
Ctrl MO NO	Non Clone- Non Clone	h6b3	8.159	1308.094	144.403	4095	13.144
Ctrl MO NO	Non Clone- Non Clone
Ctrl MO NO	Non Clone- Non Clone	h6b4	7.619	616.239	1.631	1958.78	12.3
Ctrl MO NO	Non Clone- Non Clone	h6b4	7.619	1030.377	2.786	3698.875	12.3
Ctrl MO NO	Non Clone- Non Clone	h6b4	7.619	947.857	1.321	3271.658	12.3
Ctrl MO NO	Non Clone- Non Clone	h6b4	7.619	576.43	5.645	2702.674	12.3
Ctrl MO NO	Non Clone- Non Clone	h6b4	7.619	421.962	31.738	2486.506	12.3
Ctrl MO NO	Non Clone- Non Clone	h6b4	7.619	478.357	63.114	3327.018	12.3
Ctrl MO NO	Non Clone- Non Clone	h6b4	8.429	1077.458	136.269	4095	13.618
Ctrl MO NO	Non Clone- Non Clone	h6b4	8.429	1145.284	93.815	4086.737	13.618
Ctrl MO NO	Non Clone- Non Clone	h6b4	8.429	1029.125	155.573	3781.241	13.618
Ctrl MO NO	Non Clone- Non Clone	h6b4	8.429	878.89	166.564	4084.38	13.618
Ctrl MO NO	Non Clone- Non Clone	h6b4	8.429	809.299	60.476	3614.698	13.618
Ctrl MO NO	Non Clone- Non Clone	h7b2	9.78	839.308	36.24	3062.049	15.803
Ctrl MO NO	Non Clone- Non Clone	h7b2	9.78	1205.599	88.947	4095	15.803
Ctrl MO NO	Non Clone- Non Clone	h7b2	9.78	1283.327	107.679	4095	15.803
Ctrl MO NO	Non Clone- Non Clone	h7b2	9.78	1519.469	184.276	4095	15.803
Ctrl MO NO	Non Clone- Non Clone	h7b2	9.78	1445.913	155.217	4095	15.803
Ctrl MO NO	Non Clone- Non Clone	h7b2	9.78	1278.721	138.73	4095	15.803
Ctrl MO NO	Non Clone- Non Clone	h7b2	9.78	1091.774	101.469	4095	15.803
Ctrl MO NO	Non Clone- Non Clone	h7b2	9.78	839.896	35.031	4095	15.803
Ctrl MO NO	Non Clone- Non Clone	h7b2	9.78	620.175	16.368	4095	15.803
Ctrl MO NO	Non Clone- Non Clone
Ctrl MO NO	Non Clone- Non Clone	h7b3	12.59	556.648	15.535	4095	20.383
Ctrl MO NO	Non Clone- Non Clone	h7b3	12.59	687.511	17.123	4095	20.383
Ctrl MO NO	Non Clone- Non Clone	h7b3	12.59	837.016	72.386	4095	20.383
Ctrl MO NO	Non Clone- Non Clone	h7b3	12.59	983.97	84.774	3840.469	20.383
Ctrl MO NO	Non Clone- Non Clone	h7b3	12.59	1173.92	93.202	4065.246	20.383
Ctrl MO NO	Non Clone- Non Clone	h7b3	12.59	1257.75	67.69	4094.556	20.383
Ctrl MO NO	Non Clone- Non Clone	h7b3	12.59	984.889	128.305	4095	20.383
Ctrl MO NO	Non Clone- Non Clone
Ctrl MO NO	Non Clone- Non Clone	h7b4	9.024	654.952	26.459	2221.448	14.585
Ctrl MO NO	Non Clone- Non Clone	h7b4	9.024	960.995	55.973	3840.34	14.585
Ctrl MO NO	Non Clone- Non Clone	h7b4	9.024	1012.862	89.207	4095	14.585
Ctrl MO NO	Non Clone- Non Clone	h7b4	9.024	1100.65	67.311	4095	14.585
Ctrl MO NO	Non Clone- Non Clone	h7b4	9.024	1183.671	65.216	4067.155	14.585
Ctrl MO NO	Non Clone- Non Clone	h7b4	9.024	1130.063	53.112	4095	14.585
Ctrl MO NO	Non Clone- Non Clone	h7b4	9.024	929.062	26.233	4035.217	14.585
Ctrl MO NO	Non Clone- Non Clone
Ctrl MO NO	Non Clone- Non Clone	h7b5	9.888	427.083	7.418	1227.184	15.99
Ctrl MO NO	Non Clone- Non Clone	h7b5	9.888	853.39	10.595	2562.958	15.99
Ctrl MO NO	Non Clone- Non Clone	h7b5	9.888	997.011	53.243	4095	15.99
Ctrl MO NO	Non Clone- Non Clone	h7b5	9.888	927.701	114.245	4095	15.99
Ctrl MO NO	Non Clone- Non Clone	h7b5	9.888	966.613	71.43	4095	15.99
Ctrl MO NO	Non Clone- Non Clone	h7b5	9.888	1029.685	87.722	4095	15.99
Ctrl MO NO	Non Clone- Non Clone	h7b5	9.888	1176.901	104.635	4095	15.99
Ctrl MO NO	Non Clone- Non Clone	h7b5	9.888	1230.839	130.391	4095	15.99
Ctrl MO NO	Non Clone- Non Clone	h7b5	9.888	965.05	94.495	3923.423	15.99
Ctrl MO NO	Non Clone- Non Clone
Ctrl MO NO	Non Clone- Non Clone	h7b6	9.024	796.026	48.401	3974.427	14.585
Ctrl MO NO	Non Clone- Non Clone	h7b6	9.024	816.378	101.76	4095	14.585
Ctrl MO NO	Non Clone- Non Clone	h7b6	9.024	779.255	111.171	4075.689	14.585
Ctrl MO NO	Non Clone- Non Clone	h7b6	9.024	888.177	116.166	4040.896	14.585
Ctrl MO NO	Non Clone- Non Clone	h7b6	9.024	1098.238	103.072	4095	14.585
Ctrl MO NO	Non Clone- Non Clone	h7b6	9.024	1442.674	139.734	4095	14.585
Ctrl MO NO	Non Clone- Non Clone	h7b6	9.024	1494.736	112.093	4095	14.585
Ctrl MO NO	Non Clone- Non Clone	h7b6	9.024	1050.776	147.652	4095	14.585
Ctrl MO NO	Non Clone- Non Clone	h7b6	9.024	792.207	111.456	4095	14.585
Ctrl MO NO	Non Clone- Non Clone
Ctrl MO NO	Non Clone- Non Clone	h7b7	7.187	725.728	51.135	3910.816	11.597
Ctrl MO NO	Non Clone- Non Clone	h7b7	7.187	855.292	54.691	4095	11.597
Ctrl MO NO	Non Clone- Non Clone	h7b7	7.187	866.445	148.99	4095	11.597
Ctrl MO NO	Non Clone- Non Clone	h7b7	7.187	920.661	170.51	4095	11.597
Ctrl MO NO	Non Clone- Non Clone	h7b7	7.187	1010.863	88.272	4095	11.597
Ctrl MO NO	Non Clone- Non Clone	h7b7	7.187	1198.367	180.854	4095	11.597
Ctrl MO NO	Non Clone- Non Clone	h7b7	7.187	1448.59	316.5	4093.419	11.597
Ctrl MO NO	Non Clone- Non Clone	h7b7	7.187	1356.213	287.353	3633.534	11.597
Ctrl MO NO	Non Clone- Non Clone
Ctrl MO NO	Non Clone- Non Clone	h7b8	9.726	650.25	6.589	4095	15.727
Ctrl MO NO	Non Clone- Non Clone	h7b8	9.726	701.755	23.539	4095	15.727
Ctrl MO NO	Non Clone- Non Clone	h7b8	9.726	794.635	32.317	4095	15.727
Ctrl MO NO	Non Clone- Non Clone	h7b8	11.293	1041.839	102.568	4095	18.275
Ctrl MO NO	Non Clone- Non Clone	h7b8	11.293	1332.754	123.054	4095	18.275
Ctrl MO NO	Non Clone- Non Clone	h7b8	11.293	1487.473	133.893	4095	18.275
Ctrl MO NO	Non Clone- Non Clone	h7b8	11.293	1185.573	131.757	4095	18.275
Ctrl MO NO	Non Clone- Non Clone	h7b8	11.293	883.782	56.042	4095	18.275
Ctrl MO NO	Non Clone- Non Clone	h8b1	5.674	1993.651	342.232	4095	9.137
Ctrl MO NO	Non Clone- Non Clone	h8b1	5.674	1973.467	295.121	4095	9.137
Ctrl MO NO	Non Clone- Non Clone	h8b1	5.674	1986.606	245.081	4095	9.137
Ctrl MO NO	Non Clone- Non Clone	h8b1	5.674	1850.154	297.95	4095	9.137
Ctrl MO NO	Non Clone- Non Clone	h8b1	5.674	1575.192	56.025	4075.603	9.137
Ctrl MO NO	Non Clone- Non Clone	h8b1	5.674	1184.113	47.305	3891.514	9.137
Ctrl MO NO	Non Clone- Non Clone
Ctrl MO NO	Non Clone- Non Clone	h8b2	7.511	1070.899	44.143	3337.903	12.125
Ctrl MO NO	Non Clone- Non Clone	h8b2	7.511	863.98	126.857	4095	12.125
Ctrl MO NO	Non Clone- Non Clone	h8b2	7.511	2161.057	156.919	4095	12.124
Ctrl MO NO	Non Clone- Non Clone	h8b2	7.511	2290.298	174.64	4095	12.124
Ctrl MO NO	Non Clone- Non Clone	h8b2	7.511	2285.661	198.151	4095	12.124
Ctrl MO NO	Non Clone- Non Clone	h8b2	7.511	1852.292	267.139	4095	12.124
Ctrl MO NO	Non Clone- Non Clone	h8b2	7.511	1325.737	165.486	4095	12.124
Ctrl MO NO	Non Clone- Non Clone
Ctrl MO NO	Non Clone- Non Clone	h8b3	11.725	1284.307	86.519	3981.5	18.977
Ctrl MO NO	Non Clone- Non Clone	h8b3	11.725	1323.156	56.409	3916.681	18.977
Ctrl MO NO	Non Clone- Non Clone	h8b3	11.725	1577.801	162.846	4095	18.977
Ctrl MO NO	Non Clone- Non Clone	h8b3	11.725	1720.428	195.807	4095	18.977
Ctrl MO NO	Non Clone- Non Clone	h8b3	11.725	1868.979	218.242	4095	18.977
Ctrl MO NO	Non Clone- Non Clone	h8b3	11.725	1861.571	289.379	4095	18.977
Ctrl MO NO	Non Clone- Non Clone	h8b3	11.725	1265.394	248.395	4095	18.977
Ctrl MO NO	Non Clone- Non Clone
Ctrl MO NO	Non Clone- Non Clone	h8b4	11.131	1087.08	23.571	4095	18.005
Ctrl MO NO	Non Clone- Non Clone	h8b4	11.131	1135.243	32.901	4095	18.005
Ctrl MO NO	Non Clone- Non Clone	h8b4	11.131	973.681	124.632	4095	18.005
Ctrl MO NO	Non Clone- Non Clone	h8b4	11.131	1065.033	124.917	4095	18.005
Ctrl MO NO	Non Clone- Non Clone	h8b4	11.131	1220.715	152.015	4095	18.005
Ctrl MO NO	Non Clone- Non Clone	h8b4	11.131	1370.271	214.765	4095	18.005
Ctrl MO NO	Non Clone- Non Clone	h8b4	11.131	1392.345	133.955	4095	18.005
Ctrl MO NO	Non Clone- Non Clone	h8b4	11.131	1068.468	158.065	4067.374	18.005
Ctrl MO NO	Non Clone- Non Clone
Ctrl MO NO	Non Clone- Non Clone	h8b5	9.24	561.874	23.705	3094.961	14.936
Ctrl MO NO	Non Clone- Non Clone	h8b5	9.24	701.64	17.35	4019.229	14.936
Ctrl MO NO	Non Clone- Non Clone	h8b5	9.24	843.318	46.359	4095	14.936
Ctrl MO NO	Non Clone- Non Clone	h8b5	9.24	891.376	79.049	4095	14.936
Ctrl MO NO	Non Clone- Non Clone	h8b5	9.24	890.035	133.7	4095	14.936
Ctrl MO NO	Non Clone- Non Clone	h8b5	9.24	975.953	98.716	4095	14.936
Ctrl MO NO	Non Clone- Non Clone	h8b5	9.24	1183.74	189.241	4095	14.936
Ctrl MO NO	Non Clone- Non Clone	h8b5	9.24	1426.994	245.118	4095	14.936
Ctrl MO NO	Non Clone- Non Clone	h8b5	9.24	1422.953	152.223	4095	14.936
Ctrl MO NO	Non Clone- Non Clone
Ctrl MO NO	Non Clone- Non Clone	h8b6	6.862	849.454	66.271	2942.667	11.07
Ctrl MO NO	Non Clone- Non Clone	h8b6	6.862	1065.707	73.288	3629.562	11.07
Ctrl MO NO	Non Clone- Non Clone	h8b6	6.862	1093.129	108.274	3844.658	11.07
Ctrl MO NO	Non Clone- Non Clone	h8b6	6.862	1114.929	151.395	4095	11.07
Ctrl MO NO	Non Clone- Non Clone	h8b6	6.862	1163.546	111.505	4095	11.07
Ctrl MO NO	Non Clone- Non Clone	h8b6	6.862	1237.024	169.448	4095	11.07
Ctrl MO NO	Non Clone- Non Clone	h8b6	6.862	1381.214	163.288	4095	11.07
Ctrl MO NO	Non Clone- Non Clone	h8b6	6.862	1285.862	132.117	3983.304	11.07
Ctrl MO NO	Non Clone- Non Clone	h8b6	6.862	1010.743	154.547	3782.156	11.07
Ctrl MO NO	Non Clone- Non Clone
Ctrl MO NO	Non Clone- Non Clone	h8b7	10.158	689.606	39.108	3231.37	16.43
Ctrl MO NO	Non Clone- Non Clone	h8b7	10.158	862.243	39.717	3147.872	16.43
Ctrl MO NO	Non Clone- Non Clone	h8b7	10.158	917.673	67.066	3112.817	16.43
Ctrl MO NO	Non Clone- Non Clone	h8b7	10.158	1039.756	135.891	3635.144	16.43
Ctrl MO NO	Non Clone- Non Clone	h8b7	10.158	1099.821	118.365	3874.021	16.43
Ctrl MO NO	Non Clone- Non Clone	h8b7	10.158	1177.056	176.333	4095	16.43
Ctrl MO NO	Non Clone- Non Clone	h8b7	10.158	1369.372	194.806	4095	16.43
Ctrl MO NO	Non Clone- Non Clone	h8b7	10.158	1584.07	155.25	4095	16.43
Ctrl MO NO	Non Clone- Non Clone
Ctrl MO NO	Non Clone- Non Clone	h8h8	6.808	916.579	22.284	2646.053	10.982
Ctrl MO NO	Non Clone- Non Clone	h8h8	6.808	1325.063	23.092	3916.821	10.982
Ctrl MO NO	Non Clone- Non Clone	h8h8	6.808	1607.778	58.314	4095	10.982
Ctrl MO NO	Non Clone- Non Clone	h8h8	6.808	1442.351	22.573	4095	10.982
Ctrl MO NO	Non Clone- Non Clone	h8h8	6.808	1318.543	147.13	4095	10.982
Ctrl MO NO	Non Clone- Non Clone	h8h8	6.808	1263.238	117.849	4095	10.982
Ctrl MO NO	Non Clone- Non Clone	h8h8	6.808	1152.803	226.257	4052.038	10.982
Ctrl MO NO	Non Clone- Non Clone	h8h8	6.808	1071.252	189.732	3873.263	10.982
Ctrl MO NO	Non Clone- Non Clone	h8h8	6.808	1222.269	230.972	4095	10.982
Ctrl MO NO	Non Clone- Non Clone	h8h8	6.808	1139.391	153.671	4040.771	10.982
Ctrl MO NO	Non Clone- Non Clone
Ctrl MO NO	Non Clone- Non Clone	h8b9	5.241	1036.155	24.846	3172.174	8.434
Ctrl MO NO	Non Clone- Non Clone	h8b9	5.241	1312.688	51.469	4095	8.434
Ctrl MO NO	Non Clone- Non Clone	h8b9	5.241	1192.602	39.088	3958.952	8.434
Ctrl MO NO	Non Clone- Non Clone	h8b9	5.241	1310.124	55.93	4066.742	8.434
Ctrl MO NO	Non Clone- Non Clone	h8b9	5.241	1442.453	75.523	4095	8.434
Ctrl MO NO	Non Clone- Non Clone	h8b9	5.241	1490.035	87.28	4067.261	8.434
Ctrl MO NO	Non Clone- Non Clone	h8b9	5.241	1562.403	147.064	4095	8.434
Ctrl MO NO	Non Clone- Non Clone	h8b9	5.241	1816.273	249.957	4095	8.434
Ctrl MO NO	Non Clone- Non Clone	h8b9	5.241	1639.441	213	4095	8.434
Ctrl MO NO	Non Clone- Non Clone	h8b9	5.241	1431.857	174.513	4095	8.434
Ecad MO CO	Clone- Clone	h1b1	7.349	696.446	0.254	2832.661	11.861
Ecad MO CO	Clone- Clone	h1b1	7.349	835.245	12.199	4082.625	11.861
Ecad MO CO	Clone- Clone	h1b1	7.349	793.724	4.964	4094.165	11.861
Ecad MO CO	Clone- Clone	h1b1	7.349	809.265	24.132	4095	11.861
Ecad MO CO	Clone- Clone	h1b1	7.349	845.017	47.776	4095	11.861
Ecad MO CO	Clone- Clone	h1b1	11.077	927.716	10.579	4095	17.923
Ecad MO CO	Clone- Clone	h1b1	11.077	814.771	29.964	4095	17.923
Ecad MO CO	Clone- Clone	h1b1	11.077	775.389	29.648	3982.409	17.923
Ecad MO CO	Clone- Clone	h1b1	10.915	1040.018	117.562	4051.917	17.66
Ecad MO CO	Clone- Clone	h1b1	10.915	946.037	121.279	4005.758	17.66
Ecad MO CO	Clone- Clone	h1b1	10.915	797.283	57.948	2875.948	17.66
Ecad MO CO	Clone- Clone	h1b1	10.915	763.167	53.452	3395.436	17.66
Ecad MO CO	Clone- Clone	h1b1	10.915	733.987	37.637	3190.288	17.66
Ecad MO CO	Clone- Clone	h1b1	10.915	740.967	30.365	3928.539	17.66
Ecad MO CO	Clone- Clone
Ecad MO CO	Clone- Clone	h1b2	9.888	412.195	8.032	1798.332	15.99
Ecad MO CO	Clone- Clone	h1b2	9.888	783.143	5.52	3483.844	15.99
Ecad MO CO	Clone- Clone	h1b2	9.888	837.273	28.996	4095	15.99
Ecad MO CO	Clone- Clone	h1b2	9.888	771.642	57.431	4066.69	15.99
Ecad MO CO	Clone- Clone	h1b2	9.888	752.043	54.362	3522.541	15.99
Ecad MO CO	Clone- Clone	h1b2	9.888	1112.45	129.934	3344.659	15.99
Ecad MO CO	Clone- Clone	h1b2	9.888	1168.709	167.899	4095	15.99
Ecad MO CO	Clone- Clone	h1b2	9.888	1156.692	128.053	4095	15.99
Ecad MO CO	Clone- Clone	h1b2	9.888	1258.968	156.452	4094.99	15.99
Ecad MO CO	Clone- Clone	h1b2	9.888	1462.253	185.474	4095	15.99
Ecad MO CO	Clone- Clone	h1b2	9.888	1503.72	140.069	4095	15.99
Ecad MO CO	Clone- Clone	h1b2	9.888	1148.975	86.464	4095	15.99
Ecad MO CO	Clone- Clone	h1b2	9.888	915.303	92.201	4074.671	15.99
Ecad MO CO	Clone- Clone
Ecad MO CO	Clone- Clone	h1b3	11.509	341.845	3.503	1727.781	18.625
Ecad MO CO	Clone- Clone	h1b3	11.509	725.793	11.696	3212.981	18.625
Ecad MO CO	Clone- Clone	h1b3	11.509	850.512	8.601	4095	18.625
Ecad MO CO	Clone- Clone	h1b3	11.509	754.068	15.876	4095	18.625
Ecad MO CO	Clone- Clone	h1b3	11.509	681.458	17.43	4095	18.625
Ecad MO CO	Clone- Clone	h1b3	11.509	615.817	35.771	4095	18.625
Ecad MO CO	Clone- Clone	h1b3	11.509	690.316	31.99	4095	18.625
Ecad MO CO	Clone- Clone	h1b3	11.347	980.355	32.026	4095	18.362
Ecad MO CO	Clone- Clone	h1b3	11.347	987.069	29.623	4095	18.362
Ecad MO CO	Clone- Clone	h1b3	11.347	928.864	73.755	4093.772	18.362
Ecad MO CO	Clone- Clone	h1b3	11.347	854.99	56.003	4055.562	18.362
Ecad MO CO	Clone- Clone	h1b3	11.347	693.37	31.95	4095	18.362
Ecad MO CO	Clone- Clone	h1b3	11.347	640.841	31.446	4095	18.362
Ecad MO CO	Clone- Clone	h1b3	11.347	568.495	11.534	4095	18.362
Ecad MO CO	Clone- Clone	h2b1	16.48	980.871	22.867	4087.979	26.708
Ecad MO CO	Clone- Clone	h2b1	16.48	1205.097	90.088	4095	26.708
Ecad MO CO	Clone- Clone	h2b1	16.48	1387.461	138.533	4095	26.708
Ecad MO CO	Clone- Clone	h2b1	16.48	1209.933	145.796	4095	26.708
Ecad MO CO	Clone- Clone	h2b1	16.48	958.696	99.16	4095	26.708
Ecad MO CO	Clone- Clone
Ecad MO CO	Clone- Clone	h2b2	8.105	1095.654	80.594	3084.124	13.091
Ecad MO CO	Clone- Clone	h2b2	8.105	1181.443	167.589	4095	13.091
Ecad MO CO	Clone- Clone	h2b2	8.105	1186.211	108.822	4095	13.091
Ecad MO CO	Clone- Clone	h2b2	8.105	1028.96	126.248	4095	13.091
Ecad MO CO	Clone- Clone	h2b2	8.105	945.303	59.93	4095	13.091
Ecad MO CO	Clone- Clone
Ecad MO CO	Clone- Clone	h2b3	10.104	773.599	49.551	2479.893	16.342
Ecad MO CO	Clone- Clone	h2b3	10.104	838.302	100.159	4095	16.342
Ecad MO CO	Clone- Clone	h2b3	10.104	1133.675	88.424	4095	16.342
Ecad MO CO	Clone- Clone	h2b3	10.104	1148.36	44.088	4095	16.342
Ecad MO CO	Clone- Clone	h2b3	10.104	940.758	69.827	4095	16.342
Ecad MO CO	Clone- Clone	h2b3	10.104	632.881	87.936	4095	16.342
Ecad MO CO	Clone- Clone	h2b3	10.104	405.246	29.79	3200.789	16.342
Ecad MO CO	Clone- Clone	h2b3	10.104	363.68	17.635	4095	16.342
Ecad MO CO	Clone- Clone
Ecad MO CO	Clone- Clone	h2b4	10.969	605.425	26.784	2104.555	17.747
Ecad MO CO	Clone- Clone	h2b4	10.969	819.719	2.972	3470.645	17.747
Ecad MO CO	Clone- Clone	h2b4	10.969	720.539	7.773	4084.221	17.747
Ecad MO CO	Clone- Clone	h2b4	10.969	514.93	0.839	4095	17.747
Ecad MO CO	Clone- Clone	h2b4	10.969	442.857	1.852	4093.379	17.747
Ecad MO CO	Clone- Clone
Ecad MO CO	Clone- Clone	h2b5	10.861	790.18	28.992	3472.515	17.572
Ecad MO CO	Clone- Clone	h2b5	10.861	1026.542	65.308	4095	17.572
Ecad MO CO	Clone- Clone	h2b5	10.861	1082.426	65.039	4095	17.572
Ecad MO CO	Clone- Clone	h2b5	10.861	1002.952	46.093	4095	17.572
Ecad MO CO	Clone- Clone	h2b5	10.861	884.934	73.602	4095	17.572
Ecad MO CO	Clone- Clone	h2b5	10.969	941.209	70.516	4095	17.747
Ecad MO CO	Clone- Clone	h2b5	10.969	666.397	55.776	4095	17.747
Ecad MO CO	Clone- Clone
Ecad MO CO	Clone- Clone	h2b6	5.511	816.673	79.729	3484.271	8.874
Ecad MO CO	Clone- Clone	h2b6	5.511	1364.7	155.253	4095	8.874
Ecad MO CO	Clone- Clone	h2b6	5.511	1603.026	269.99	4095	8.874
Ecad MO CO	Clone- Clone	h2b6	5.511	1472.43	301.119	4095	8.874
Ecad MO CO	Clone- Clone	h2b6	5.511	1229.36	202.535	4095	8.874
Ecad MO CO	Clone- Clone	h2b6	5.511	864.911	128.342	4094.646	8.874
Ecad MO CO	Clone- Clone	h3b1	6.322	1026.082	111.65	4091.633	10.191
Ecad MO CO	Clone- Clone	h3b1	6.322	1059.889	126.55	4033.914	10.191
Ecad MO CO	Clone- Clone	h3b1	6.322	686.728	96.072	3363.054	10.191
Ecad MO CO	Clone- Clone	h3b1	6.322	560.807	67.958	3928.766	10.191
Ecad MO CO	Clone- Clone	h3b1	6.484	950.704	124.388	3960.368	10.454
Ecad MO CO	Clone- Clone	h3b1	6.484	1103.904	94.358	4095	10.454
Ecad MO CO	Clone- Clone	h3b1	6.484	1131.893	80.003	4092.537	10.454
Ecad MO CO	Clone- Clone	h3b1	6.322	1559.439	205.589	4095	10.191
Ecad MO CO	Clone- Clone	h3b1	6.322	1143.031	169.676	3826.172	10.191
Ecad MO CO	Clone- Clone	h3b1	6.322	724.988	104.171	2030.474	10.191
Ecad MO CO	Clone- Clone	h3b1	6.322	412.685	38.63	2151.559	10.191
Ecad MO CO	Clone- Clone
Ecad MO CO	Clone- Clone	h3b2	9.618	1036.015	182.653	4069.239	15.551
Ecad MO CO	Clone- Clone	h3b2	9.618	935.885	168.126	2894.291	15.551
Ecad MO CO	Clone- Clone	h3b2	9.618	844.204	122.646	3943.062	15.551
Ecad MO CO	Clone- Clone	h3b2	9.402	980.084	62.767	3388.809	15.2
Ecad MO CO	Clone- Clone	h3b2	9.402	1062.198	115.937	4090.662	15.2
Ecad MO CO	Clone- Clone	h3b2	9.402	975.882	90.38	4095	15.2
Ecad MO CO	Clone- Clone	h3b2	9.402	848.149	27.71	4093.567	15.2
Ecad MO CO	Clone- Clone
Ecad MO CO	Clone- Clone	h3b3	6.754	737.779	83.21	3717.22	10.894
Ecad MO CO	Clone- Clone	h3b3	6.754	714.516	99.192	4095	10.894
Ecad MO CO	Clone- Clone	h3b3	6.754	652.902	67.022	4095	10.894
Ecad MO CO	Clone- Clone	h3b3	6.754	682.545	48.547	3727.063	10.894
Ecad MO CO	Clone- Clone	h3b3	6.592	1120.815	52.317	3983.947	10.631
Ecad MO CO	Clone- Clone	h3b3	6.592	1035.615	12.945	3589.864	10.631
Ecad MO CO	Clone- Clone	h3b3	6.592	576.759	72.414	3318.746	10.631
Ecad MO CO	Clone- Clone	h3b3	6.592	470.972	63.609	3211.7	10.631
Ecad MO CO	Clone- Clone
Ecad MO CO	Clone- Clone	h3b4	6.916	1165.796	317.983	3739.559	11.158
Ecad MO CO	Clone- Clone	h3b4	6.916	1305.219	261.011	3937.111	11.158
Ecad MO CO	Clone- Clone	h3b4	6.916	1449.828	319.826	4015.298	11.158
Ecad MO CO	Clone- Clone	h3b4	6.916	1559.075	161.02	4067.748	11.158
Ecad MO CO	Clone- Clone	h3b4	6.916	1409.974	78.748	3899.839	11.158
Ecad MO CO	Clone- Clone	h3b4	6.916	1361.293	35.706	4095	11.158
Ecad MO CO	Clone- Clone	h3b4	6.916	1297.014	61.094	4095	11.158
Ecad MO CO	Clone- Clone
Ecad MO CO	Clone- Clone	h3b5	7.673	1117.992	69.551	4095	12.388
Ecad MO CO	Clone- Clone	h3b5	7.673	1223.907	169.388	4095	12.388
Ecad MO CO	Clone- Clone	h3b5	7.673	1240.746	137.065	4095	12.388
Ecad MO CO	Clone- Clone	h3b5	7.673	1151.125	96.914	4095	12.388
Ecad MO CO	Clone- Clone	h3b5	7.673	941.377	107.983	4030.13	12.388
Ecad MO CO	Clone- Clone	h3b5	7.673	848.479	62.524	3958.473	12.388
Ecad MO CO	Clone- Clone	h3b5	7.673	828.291	55.385	4095	12.388
Ecad MO CO	Clone- Clone
Ecad MO CO	Clone- Clone	h3b6	9.24	1162.589	132.996	4064.656	14.936
Ecad MO CO	Clone- Clone	h3b6	9.24	1256.048	205.724	4095	14.936
Ecad MO CO	Clone- Clone	h3b6	9.24	1116.83	166.381	4095	14.936
Ecad MO CO	Clone- Clone	h3b6	9.24	899.035	115.657	3897.661	14.936
Ecad MO CO	Clone- Clone	h3b6	9.78	1024.162	83.405	3532.729	15.815
Ecad MO CO	Clone- Clone	h3b6	9.78	944.967	83.989	4095	15.815
Ecad MO CO	Clone- Clone	h3b6	10.104	1328.897	166.732	4095	16.342
Ecad MO CO	Clone- Clone	h3b6	10.104	1308.501	139.51	4095	16.342
Ecad MO CO	Clone- Clone	h3b6	10.104	1165.528	55.647	4095	16.342
Ecad MO CO	Clone- Clone
Ecad MO CO	Clone- Clone	h3b7	9.402	1262.664	159.407	4095	15.199
Ecad MO CO	Clone- Clone	h3b7	9.402	1209.644	94.137	4095	15.199
Ecad MO CO	Clone- Clone	h3b7	9.402	1021.783	89.701	4094.008	15.199
Ecad MO CO	Clone- Clone	h3b7	9.402	802.051	64.539	4060.262	15.199
Ecad MO CO	Clone- Clone	h3b7	9.402	598.564	32.994	2982.81	15.199
Ecad MO CO	Clone- Clone	h3b7	9.402	507.344	60.596	4090.951	15.199
Ecad MO CO	Clone- Clone
Ecad MO CO	Clone- Clone	h3b8	16.859	1097.123	34.627	4095	27.324
Ecad MO CO	Clone- Clone	h3b8	16.859	1126.67	51.049	4095	27.324
Ecad MO CO	Clone- Clone	h3b8	16.859	1085.187	12.149	4095	27.324
Ecad MO CO	Clone- Clone	h3b8	16.859	926.965	40.099	4095	27.324
Ecad MO CO	Clone- Clone	h3b8	16.859	739.975	40.378	4051.518	27.324
Ecad MO CO	Clone- Clone	h3b8	16.318	1339.675	125.856	4095	26.445
Ecad MO CO	Clone- Clone	h3b8	16.318	1133.344	122.397	4095	26.445
Ecad MO CO	Clone- Clone	h3b8	16.318	894.989	120.933	4095	26.445
Ecad MO CO	Clone- Clone	h3b8	16.318	801.887	112.033	4095	26.445
Ecad MO CO	Clone- Clone
Ecad MO CO	Clone- Clone	h3b9	6.592	1018.357	62.856	3823.106	10.631
Ecad MO CO	Clone- Clone	h3b9	6.592	857.595	73.635	3036.921	10.631
Ecad MO CO	Clone- Clone	h3b9	6.592	716.714	69.745	2537.94	10.631
Ecad MO CO	Clone- Clone	h3b9	6.592	534.688	91.559	3535.362	10.631
Ecad MO CO	Clone- Clone	h3b9	6.592	488.176	79.691	4062.162	10.631
Ecad MO CO	Clone- Clone	h3b9	6.592	430.114	116.801	4095	10.631
Ecad MO CO	Clone- Clone	h3b9	6.592	412.959	89.605	2691.926	10.631
Ecad MO CO	Clone- Clone
Ecad MO CO	Clone- Clone	h3b10	6.592	1018.357	62.856	3823.106	10.631
Ecad MO CO	Clone- Clone	h3b10	6.592	857.595	73.635	3036.921	10.631
Ecad MO CO	Clone- Clone	h3b10	6.592	716.714	69.745	2537.94	10.631
Ecad MO CO	Clone- Clone	h3b10	6.43	877.618	136.998	4086.376	10.367
Ecad MO CO	Clone- Clone	h3b10	6.43	758.554	111.633	4095	10.367
Ecad MO CO	Clone- Clone	h3b10	6.052	1355.482	199.511	4095	9.752
Ecad MO CO	Clone- Clone	h3b10	6.052	1260.448	193.252	4095	9.752
Ecad MO CO	Clone- Clone	h3b10	6.052	1185.397	191.966	4095	9.752
Ecad MO CO	Clone- Clone	h3b10	6.052	1248.225	100.568	4095	9.752
Ecad MO CO	Clone- Clone	h3b10	6.052	1368.576	204.324	4095	9.752
Ecad MO CO	Clone- Clone
Ecad MO CO	Clone- Clone	h3b11	11.942	846.183	41.675	4077.093	19.329
Ecad MO CO	Clone- Clone	h3b11	11.942	1004.657	98.116	4093.576	19.329
Ecad MO CO	Clone- Clone	h3b11	11.942	1008.072	128.254	3973.111	19.329
Ecad MO CO	Clone- Clone	h3b11	11.942	1016.706	108.201	4062.065	19.329
Ecad MO CO	Clone- Clone	h3b11	11.942	1033.825	150.629	4095	19.329
Ecad MO CO	Clone- Clone	h3b11	11.942	1042.108	95.187	4095	19.329
Ecad MO CO	Clone- Clone	h3b11	11.942	1118.672	180.375	4095	19.329
Ecad MO CO	Clone- Clone	h3b11	10.483	1101.877	248.539	4095	16.957
Ecad MO CO	Clone- Clone
Ecad MO CO	Clone- Clone	h3b12	8.808	1300.899	191.877	4095	14.231
Ecad MO CO	Clone- Clone	h3b12	8.808	1382.763	194.172	3978.35	14.231
Ecad MO CO	Clone- Clone	h3b12	8.808	1423.062	154.121	4085.644	14.231
Ecad MO CO	Clone- Clone	h3b12	8.808	1633.967	198.808	4095	14.231
Ecad MO CO	Clone- Clone	h3b12	8.808	1814.355	86.183	4094.471	14.231
Ecad MO CO	Clone- Clone	h3b12	8.808	1643.968	47.985	4095	14.231
Ecad MO CO	Clone- Clone
Ecad MO CO	Clone- Clone	h3b13	11.077	562.921	3.412	2326.811	17.923
Ecad MO CO	Clone- Clone	h3b13	11.077	447.803	10.674	2006.2	17.923
Ecad MO CO	Clone- Clone	h3b13	11.077	394.329	8.279	1612.756	17.923
Ecad MO CO	Clone- Clone	h3b13	13.563	474.504	29.052	3813.24	21.965
Ecad MO CO	Clone- Clone	h3b13	13.563	563.435	30.738	4087.405	21.965
Ecad MO CO	Clone- Clone	h3b13	13.563	537.552	21.947	4095	21.965
Ecad MO CO	Clone- Clone	h3b13	11.455	741.981	90.14	4095	18.538
Ecad MO CO	Clone- Clone	h3b13	11.455	738.233	45.673	4095	18.538
Ecad MO CO	Clone- Clone
Ecad MO CO	Clone- Clone	h3b14	8.591	883.184	113.403	4092.518	13.882
Ecad MO CO	Clone- Clone	h3b14	8.591	834.168	56.225	3983.839	13.882
Ecad MO CO	Clone- Clone	h3b14	8.591	711.738	40.17	2382.926	13.882
Ecad MO CO	Clone- Clone	h3b14	8.591	516.485	27.9	3055.715	13.882
Ecad MO CO	Clone- Clone	h3b14	8.591	409.618	41.408	1600.724	13.882
Ecad MO CO	Clone- Clone	h3b14	8.591	404.682	31.91	1780.679	13.882
Ecad MO CO	Clone- Clone
Ecad MO CO	Clone- Clone	h3b15	4.377	532.131	22.32	3894.081	7.029
Ecad MO CO	Clone- Clone	h3b15	4.377	461.116	33.66	3419.377	7.029
Ecad MO CO	Clone- Clone	h3b15	4.377	381.736	52.292	1957.809	7.029
Ecad MO CO	Clone- Clone	h3b15	4.377	311.913	55.533	1137.149	7.029
Ecad MO CO	Clone- Clone	h3b15	4.377	320.226	34.41	1603.887	7.029
Ecad MO CO	Clone- Clone
Ecad MO CO	Clone- Clone	h3b16	13.833	822.837	28.582	2743.504	22.404
Ecad MO CO	Clone- Clone	h3b16	13.833	652.559	31.437	3207.997	22.404
Ecad MO CO	Clone- Clone	h3b16	13.13	995.47	92.415	3410.847	21.262
Ecad MO CO	Clone- Clone	h3b16	13.13	845.747	122.504	3674.454	21.262
Ecad MO CO	Clone- Clone	h3b16	13.563	1518.178	180.363	4095	21.965
Ecad MO CO	Clone- Clone	h4b1	9.456	1506.474	63.399	4095	15.287
Ecad MO CO	Clone- Clone	h4b1	9.456	1032.493	86.269	4095	15.287
Ecad MO CO	Clone- Clone	h4b1	9.456	687.291	97.506	4085.124	15.287
Ecad MO CO	Clone- Clone	h4b1	9.456	464.383	20.183	4095	15.287
Ecad MO CO	Clone- Clone	h4b1	9.456	351.91	16.564	3773.255	15.287
Ecad MO CO	Clone- Clone
Ecad MO CO	Clone- Clone	h4b2	4.863	1181.53	120.373	4095	7.774
Ecad MO CO	Clone- Clone	h4b2	4.863	1344.9	313.324	4095	7.774
Ecad MO CO	Clone- Clone	h4b2	4.863	1529.922	244.244	4095	7.774
Ecad MO CO	Clone- Clone	h4b2	4.863	1729.776	178.748	4095	7.774
Ecad MO CO	Clone- Clone	h4b2	4.863	1867.033	301.32	4095	7.774
Ecad MO CO	Clone- Clone	h4b2	4.863	1486.171	135.61	4095	7.774
Ecad MO CO	Clone- Clone
Ecad MO CO	Clone- Clone	h4b3	5.025	1087.726	120.297	3564.588	8.083
Ecad MO CO	Clone- Clone	h4b3	5.025	1496.532	111.708	4095	8.083
Ecad MO CO	Clone- Clone	h4b3	5.025	1576.434	83.918	4095	8.083
Ecad MO CO	Clone- Clone	h4b3	5.025	1613.145	93.497	4095	8.083
Ecad MO CO	Clone- Clone	h4b3	5.025	1481.642	123.302	4095	8.083
Ecad MO CO	Clone- Clone	h4b3	5.025	1017.161	99.182	4095	8.083
Ecad MO CO	Clone- Clone	h4b3	5.025	342.927	30.655	1079.959	8.083
Ecad MO CO	Clone- Clone
Ecad MO CO	Clone- Clone	h4b4	10.861	995.748	46.366	4071.035	17.572
Ecad MO CO	Clone- Clone	h4b4	10.861	1284.859	52.389	4095	17.572
Ecad MO CO	Clone- Clone	h4b4	10.861	1342.522	105.576	4095	17.572
Ecad MO CO	Clone- Clone	h4b4	10.861	1319.586	99.984	4095	17.572
Ecad MO CO	Clone- Clone	h4b4	10.861	1265.086	105.932	4095	17.572
Ecad MO CO	Clone- Clone	h4b4	10.861	942.266	55.53	4095	17.572
Ecad MO CO	Clone- Clone	h4b4	10.861	596.184	28.429	4048.669	17.572
Ecad MO CO	Clone- Clone
Ecad MO CO	Clone- Clone	h4b5	8.808	357.664	14.292	1169.733	14.233
Ecad MO CO	Clone- Clone	h4b5	8.808	619.388	36.359	2949.421	14.233
Ecad MO CO	Clone- Clone	h4b5	8.808	861.235	55.484	4095	14.233
Ecad MO CO	Clone- Clone	h4b5	8.808	980.764	144.696	4095	14.233
Ecad MO CO	Clone- Clone	h4b5	8.808	958.381	129.045	4095	14.233
Ecad MO CO	Clone- Clone	h4b5	8.808	947.665	133.792	4095	14.233
Ecad MO CO	Clone- Clone	h4b5	8.808	956.811	114.969	4095	14.233
Ecad MO CO	Clone- Clone	h4b5	8.808	854.086	70.165	4079.965	14.233
Ecad MO CO	Clone- Clone	h4b5	8.808	706.83	20.11	3366.903	14.233
Ecad MO CO	Clone- Clone
Ecad MO CO	Clone- Clone	h4b6	6.808	1196.004	76.235	4095	10.982
Ecad MO CO	Clone- Clone	h4b6	6.808	1194.428	70.66	4095	10.982
Ecad MO CO	Clone- Clone	h4b6	6.808	1398.875	130.869	4095	10.982
Ecad MO CO	Clone- Clone	h4b6	6.808	1526.972	142.297	4095	10.982
Ecad MO CO	Clone- Clone	h4b6	6.808	1736.22	183.863	4095	10.982
Ecad MO CO	Clone- Clone	h4b6	6.808	1754.404	188.101	4095	10.982
Ecad MO CO	Clone- Clone	h4b6	6.808	1149.344	126.736	4095	10.982
Ecad MO CO	Clone- Clone
Ecad MO CO	Clone- Clone	h4b7	6.052	345.099	30.697	1310.82	9.752
Ecad MO CO	Clone- Clone	h4b7	6.052	682.806	41.272	3690.503	9.752
Ecad MO CO	Clone- Clone	h4b7	6.052	989.984	44.417	4095	9.752
Ecad MO CO	Clone- Clone	h4b7	6.052	1190.768	202.484	4095	9.752
Ecad MO CO	Clone- Clone	h4b7	6.052	1440.593	272.049	4095	9.752
Ecad MO CO	Clone- Clone	h4b7	6.052	1810.485	289.196	4095	9.752
Ecad MO CO	Clone- Clone	h4b7	6.052	2262.609	229.742	4095	9.752
Ecad MO CO	Clone- Clone	h4b7	6.052	2044.153	290.741	4095	9.752
Ecad MO CO	Clone- Clone	h4b7	6.052	736.741	242.173	2758.207	9.752
Ecad MO CO	Clone- Clone
Ecad MO CO	Clone- Clone	h4b8	9.888	182.445	8.169	1627.837	15.99
Ecad MO CO	Clone- Clone	h4b8	9.888	337.503	26.935	3768.821	15.99
Ecad MO CO	Clone- Clone	h4b8	9.888	549.582	37.9	4095	15.99
Ecad MO CO	Clone- Clone	h4b8	9.888	1003.139	132.609	4094.61	15.99
Ecad MO CO	Clone- Clone	h4b8	9.888	1197.703	150.745	4065.109	15.99
Ecad MO CO	Clone- Clone	h4b8	9.888	1260.768	177.656	4095	15.99
Ecad MO CO	Clone- Clone	h4b8	9.888	1292.716	79.442	4095	15.99
Ecad MO CO	Clone- Clone	h4b8	9.888	1075.012	52.723	3442.526	15.99
Ecad MO CO	Clone- Clone	h4b8	9.888	891.154	43.335	4095	15.99
Ecad MO CO	Clone- Clone
Ecad MO CO	Clone- Clone	h4b9	8.429	719.193	52.458	2737.353	13.617
Ecad MO CO	Clone- Clone	h4b9	8.429	1083.869	80.18	4095	13.617
Ecad MO CO	Clone- Clone	h4b9	8.429	1310.757	140.964	4095	13.617
Ecad MO CO	Clone- Clone	h4b9	8.429	1495.862	180.836	4095	13.617
Ecad MO CO	Clone- Clone	h4b9	8.429	1601.518	204.754	4095	13.617
Ecad MO CO	Clone- Clone	h4b9	8.429	1679.904	243.296	4095	13.617
Ecad MO CO	Clone- Clone	h4b9	8.429	1432.07	126.525	4095	13.617
Ecad MO CO	Clone- Clone	h4b9	8.429	749.604	73.133	3853.738	13.617
Ecad MO CO	Clone- Clone
Ecad MO CO	Clone- Clone	h4b10	14.157	709.451	20.439	4062.052	22.931
Ecad MO CO	Clone- Clone	h4b10	14.157	888.241	78.002	4095	22.931
Ecad MO CO	Clone- Clone	h4b10	14.157	995.276	150.118	4095	22.931
Ecad MO CO	Clone- Clone	h4b10	14.157	1059.154	211.139	4095	22.931
Ecad MO CO	Clone- Clone	h4b10	14.157	961.543	151.487	4023.566	22.931
Ecad MO CO	Clone- Clone	h4b10	14.157	631.526	94.356	3986.41	22.931
Ecad MO CO	Clone- Clone	h4b10	14.157	429.651	36.178	3195.814	22.931
Ecad MO CO	Clone- Clone
Ecad MO CO	Clone- Clone	h4b11	6.16	976.201	33.942	4095	9.928
Ecad MO CO	Clone- Clone	h4b11	6.16	860.841	74.396	4095	9.928
Ecad MO CO	Clone- Clone	h4b11	6.16	854.581	41.207	4095	9.928
Ecad MO CO	Clone- Clone	h4b11	6.16	747.454	57.033	4095	9.928
Ecad MO CO	Clone- Clone	h4b11	6.16	637.571	74.09	2134.979	9.928
Ecad MO CO	Clone- Clone	h4b11	6.16	542.786	77.149	3881.762	9.928
Ecad MO CO	Clone- Clone
Ecad MO CO	Clone- Clone	h4b12	5.133	1176.117	110.095	4095	8.259
Ecad MO CO	Clone- Clone	h4b12	5.133	1227.243	87.072	4095	8.259
Ecad MO CO	Clone- Clone	h4b12	5.133	1267.709	98.253	4095	8.259
Ecad MO CO	Clone- Clone	h4b12	5.133	1215.754	56.028	4095	8.259
Ecad MO CO	Clone- Clone	h4b12	5.133	792.903	56.935	3989.507	8.259
Ecad MO CO	Clone- Clone	h4b12	5.133	576.476	65.691	3260.956	8.259
Ecad MO CO	Clone- Clone	h4b12	5.133	545.768	70.977	3448.095	8.259
Ecad MO CO	Clone- Clone
Ecad MO CO	Clone- Clone	h4b13	8.916	348.856	4.557	1315.278	14.409
Ecad MO CO	Clone- Clone	h4b13	8.916	665.931	15.087	2982.539	14.409
Ecad MO CO	Clone- Clone	h4b13	8.916	962.966	26.65	4095	14.409
Ecad MO CO	Clone- Clone	h4b13	8.916	1017.088	123.628	4095	14.409
Ecad MO CO	Clone- Clone	h4b13	8.916	1107.38	171.217	4095	14.409
Ecad MO CO	Clone- Clone	h4b13	8.916	1226.667	135.039	4095	14.409
Ecad MO CO	Clone- Clone	h4b13	8.916	766.77	77.36	2776.347	14.409
Ecad MO CO	Clone- Clone	h4b13	8.916	399.176	51.302	1888.356	14.409
Ecad MO CO	Clone- Clone	h4b13	8.916	335.061	35.101	3638.036	14.409
Ecad MO CO	Clone- Clone
Ecad MO CO	Clone- Clone	h4b14	10.375	851.229	54.626	3365.096	16.781
Ecad MO CO	Clone- Clone	h4b14	10.375	950.871	75.837	3156.868	16.781
Ecad MO CO	Clone- Clone	h4b14	10.375	1073.958	62.681	4095	16.781
Ecad MO CO	Clone- Clone	h4b14	10.375	1153.977	44.579	4095	16.781
Ecad MO CO	Clone- Clone	h4b14	10.375	1217.015	51.765	4095	16.781
Ecad MO CO	Clone- Clone	h4b14	10.375	1242.963	91.649	4095	16.781
Ecad MO CO	Clone- Clone	h4b14	10.375	963.441	80.486	4095	16.781
Ecad MO CO	Clone- Clone	h4b14	10.375	765.493	89.445	4095	16.781
Ecad MO CO	Clone- Clone
Ecad MO CO	Clone- Clone	h4b15	4.323	958.481	49.058	3903.16	6.941
Ecad MO CO	Clone- Clone	h4b15	4.323	1139.668	52.83	4095	6.941
Ecad MO CO	Clone- Clone	h4b15	4.323	1518.993	114.79	4095	6.941
Ecad MO CO	Clone- Clone	h4b15	4.323	1734.025	148.101	4095	6.941
Ecad MO CO	Clone- Clone	h4b15	4.323	1547.482	135.334	4095	6.941
Ecad MO CO	Clone- Clone	h4b15	4.323	629.691	88.898	3317.177	6.941
Ecad MO CO	Clone- Clone	h4b15	4.323	266.734	18.848	1492.151	6.941
Ecad MO CO	Clone- Clone
Ecad MO CO	Clone- Clone	h4b16	13.509	426.389	14.131	1239.421	21.877
Ecad MO CO	Clone- Clone	h4b16	13.509	871.733	30.408	4000.239	21.877
Ecad MO CO	Clone- Clone	h4b16	13.509	1088.446	50.589	4095	21.877
Ecad MO CO	Clone- Clone	h4b16	13.509	1234.747	79.17	4095	21.877
Ecad MO CO	Clone- Clone	h4b16	13.509	1309.473	44.455	4095	21.877
Ecad MO CO	Clone- Clone	h4b16	13.509	1305.111	77.992	4095	21.877
Ecad MO CO	Clone- Clone	h4b16	13.509	1137.624	97.85	4095	21.877
Ecad MO CO	Clone- Clone	h4b16	13.509	1085.653	95.981	4095	21.877
Ecad MO CO	Clone- Clone	h4b16	13.509	1017.656	90.555	4095	21.877
Ecad MO CO	Clone- Clone
Ecad MO CO	Clone- Clone	h4b17	7.403	924.596	65.016	3527.29	11.925
Ecad MO CO	Clone- Clone	h4b17	7.403	968.049	219.871	4012.704	11.925
Ecad MO CO	Clone- Clone	h4b17	7.403	1110.656	230.03	4071.571	11.925
Ecad MO CO	Clone- Clone	h4b17	7.403	1238.326	197.473	4093.373	11.925
Ecad MO CO	Clone- Clone	h4b17	7.403	1312.098	177.23	4095	11.925
Ecad MO CO	Clone- Clone	h4b17	7.403	1427.752	162.49	4095	11.925
Ecad MO CO	Clone- Clone	h4b17	7.403	1104.808	109.253	4095	11.925
Ecad MO CO	Clone- Clone	h4b17	7.403	854.851	120.335	3934.543	11.925
Ecad MO CO	Clone- Clone
Ecad MO CO	Clone- Clone	h4b18	15.886	716.314	19.944	3847.253	25.743
Ecad MO CO	Clone- Clone	h4b18	15.886	817.419	24.544	3606.995	25.743
Ecad MO CO	Clone- Clone	h4b18	15.886	929.52	23.974	4093.96	25.743
Ecad MO CO	Clone- Clone	h4b18	15.886	1025.954	58.057	4095	25.743
Ecad MO CO	Clone- Clone	h4b18	15.886	897.708	30.152	4095	25.743
Ecad MO CO	Clone- Clone	h4b18	15.886	505.556	44.178	2506.815	25.743
Ecad MO CO	Clone- Clone	h4b18	15.886	408.905	25.274	2455.841	25.743
Ecad MO CO	Clone- Clone	h5b1	9.402	247.503	10.497	1223.12	15.197
Ecad MO CO	Clone- Clone	h5b1	9.402	482.12	22.434	3428.79	15.197
Ecad MO CO	Clone- Clone	h5b1	9.402	645.29	79.325	4095	15.197
Ecad MO CO	Clone- Clone	h5b1	9.402	844.987	107.766	4095	15.197
Ecad MO CO	Clone- Clone	h5b1	9.402	1120.2	101.886	4095	15.197
Ecad MO CO	Clone- Clone	h5b1	9.402	1380.557	98.731	4095	15.197
Ecad MO CO	Clone- Clone	h5b1	9.402	1373.296	70.594	4095	15.197
Ecad MO CO	Clone- Clone	h5b1	9.402	1276.803	115.984	4095	15.197
Ecad MO CO	Clone- Clone
Ecad MO CO	Clone- Clone	h5b2	11.023	801.798	3.288	4095	17.835
Ecad MO CO	Clone- Clone	h5b2	11.023	723.542	27.127	4095	17.835
Ecad MO CO	Clone- Clone	h5b2	9.294	936.333	133.121	3306.941	15.024
Ecad MO CO	Clone- Clone	h5b2	9.294	1239.204	119.879	4095	15.024
Ecad MO CO	Clone- Clone	h5b2	9.294	1132.943	144.531	3909.488	15.024
Ecad MO CO	Clone- Clone	h5b2	9.294	1001.878	193.253	4095	15.024
Ecad MO CO	Clone- Clone	h5b2	9.294	1033.057	106.352	4095	15.024
Ecad MO CO	Clone- Clone	h5b2	9.294	903.158	49.852	4095	15.024
Ecad MO CO	Clone- Clone
Ecad MO CO	Clone- Clone	h5b3	8.105	931.283	33.27	4031.736	13.091
Ecad MO CO	Clone- Clone	h5b3	8.105	960.883	52.792	4095	13.091
Ecad MO CO	Clone- Clone	h5b3	8.105	961.156	110.876	4095	13.091
Ecad MO CO	Clone- Clone	h5b3	8.105	1026.457	168.82	4095	13.091
Ecad MO CO	Clone- Clone	h5b3	8.105	1055.636	171.236	4095	13.091
Ecad MO CO	Clone- Clone	h5b3	8.105	1068.845	135.539	4087.447	13.091
Ecad MO CO	Clone- Clone	h5b3	8.105	752.749	92.879	3925.814	13.091
Ecad MO CO	Clone- Clone
Ecad MO CO	Clone- Clone	h5b4	8.7	940.295	51.118	3691.862	14.057
Ecad MO CO	Clone- Clone	h5b4	8.7	1168.471	48.09	4095	14.057
Ecad MO CO	Clone- Clone	h5b4	8.7	1082.641	55.522	4035.934	14.057
Ecad MO CO	Clone- Clone	h5b4	8.7	884.159	21.85	3905.928	14.057
Ecad MO CO	Clone- Clone	h5b4	8.7	796.045	49.202	4095	14.057
Ecad MO CO	Clone- Clone	h5b4	8.7	619.822	14.734	4095	14.057
Ecad MO CO	Clone- Clone
Ecad MO CO	Clone- Clone	h5b5	9.294	663.668	59.035	4095	15.024
Ecad MO CO	Clone- Clone	h5b5	9.294	801.607	53.024	4095	15.024
Ecad MO CO	Clone- Clone	h5b5	9.294	901.256	63.378	4009.496	15.024
Ecad MO CO	Clone- Clone	h5b5	9.294	961.119	51.638	4095	15.024
Ecad MO CO	Clone- Clone	h5b5	9.294	759.82	72.058	4068.506	15.024
Ecad MO CO	Clone- Clone	h5b5	9.294	446.922	49.595	2591.97	15.024
Ecad MO CO	Clone- Clone
Ecad MO CO	Clone- Clone	h5b6	13.563	782.769	62.763	4095	21.964
Ecad MO CO	Clone- Clone	h5b6	13.563	910.387	109.741	4095	21.964
Ecad MO CO	Clone- Clone	h5b6	13.563	952.107	92.077	4095	21.964
Ecad MO CO	Clone- Clone	h5b6	13.563	982.156	162.055	4095	21.964
Ecad MO CO	Clone- Clone	h5b6	13.563	852.969	93.157	4079.582	21.964
Ecad MO CO	Clone- Clone	h5b6	13.563	554.479	60.716	4058.306	21.964
Ecad MO CO	Clone- Clone
Ecad MO CO	Clone- Clone	h5b7	9.51	1048.909	69.331	4095	15.375
Ecad MO CO	Clone- Clone	h5b7	9.51	1115.683	36.209	4095	15.375
Ecad MO CO	Clone- Clone	h5b7	9.51	1129.403	74.246	4095	15.375
Ecad MO CO	Clone- Clone	h5b7	9.51	1013.857	128.691	4095	15.375
Ecad MO CO	Clone- Clone	h5b7	9.51	700.497	70.402	3578.709	15.375
Ecad MO CO	Clone- Clone	h5b7	9.51	627.01	51.382	4095	15.375
Ecad MO CO	Clone- Clone
Ecad MO CO	Clone- Clone	h5b8	9.888	834.261	0	3491.254	15.99
Ecad MO CO	Clone- Clone	h5b8	9.888	897.959	0	4080.791	15.99
Ecad MO CO	Clone- Clone	h5b8	9.888	820.922	0	4068.635	15.99
Ecad MO CO	Clone- Clone	h5b8	9.888	656.014	0	3970.698	15.99
Ecad MO CO	Clone- Clone	h5b8	9.888	512.42	0	2619.29	15.99
Ecad MO CO	Clone- Clone	h5b8	9.888	376.269	0	3169.93	15.99
Ecad MO CO	Clone- Clone
Ecad MO CO	Clone- Clone	h5b9	5.782	991.41	68.31	4095	9.313
Ecad MO CO	Clone- Clone	h5b9	5.782	1071.031	85.501	4095	9.313
Ecad MO CO	Clone- Clone	h5b9	5.782	1110.118	110.126	4095	9.313
Ecad MO CO	Clone- Clone	h5b9	5.782	1020.645	148.606	3997.052	9.313
Ecad MO CO	Clone- Clone	h5b9	5.782	884.93	94.644	3350.548	9.313
Ecad MO CO	Clone- Clone	h5b9	5.782	793.681	105.799	3961.148	9.313
Ecad MO CO	Clone- Clone	h5b9	5.782	558.569	72.973	2806.057	9.313
Ecad MO CO	Clone- Clone
Ecad MO CO	Clone- Clone	h5b10	11.185	1063.448	99.785	4095	18.099
Ecad MO CO	Clone- Clone	h5b10	11.185	1216.921	148.438	4095	18.099
Ecad MO CO	Clone- Clone	h5b10	11.185	1414.389	253.794	4095	18.099
Ecad MO CO	Clone- Clone	h5b10	11.185	1422.716	193.151	4095	18.099
Ecad MO CO	Clone- Clone	h5b10	11.185	1262.996	178.742	4095	18.099
Ecad MO CO	Clone- Clone	h5b10	11.185	853.682	97.916	4095	18.099
Ecad MO CO	Clone- Clone	h5b10	11.185	428.245	31.148	4033.15	18.099
Ecad MO CO	Clone- Clone	h6b1	9.24	1114.705	37.302	3105.488	14.936
Ecad MO CO	Clone- Clone	h6b1	9.24	868.528	34.634	2963.511	14.936
Ecad MO CO	Clone- Clone	h6b1	8.97	1185.45	211.495	4094.134	14.495
Ecad MO CO	Clone- Clone	h6b1	8.97	1033.706	170.905	3722.151	14.495
Ecad MO CO	Clone- Clone	h6b1	8.97	717.641	92.837	3243.577	14.495
Ecad MO CO	Clone- Clone	h6b1	8.7	1252.994	173.09	3746.058	14.057
Ecad MO CO	Clone- Clone	h6b1	8.7	1042.481	86.525	3977.847	14.057
Ecad MO CO	Clone- Clone	h6b1	8.7	796.604	94.134	3726.635	14.057
Ecad MO CO	Clone- Clone	h6b1	8.7	613.989	51.225	4082.856	14.057
Ecad MO CO	Clone- Clone	h6b1	8.7	379.679	26.288	2560.427	14.057
Ecad MO CO	Clone- Clone
Ecad MO CO	Clone- Clone	h6b2	7.295	1422.564	120.694	4036.415	11.751
Ecad MO CO	Clone- Clone	h6b2	7.295	1670.566	97.752	4095	11.751
Ecad MO CO	Clone- Clone	h6b2	7.295	2023.023	162.125	4095	11.751
Ecad MO CO	Clone- Clone	h6b2	7.295	1900.49	218.384	4095	11.751
Ecad MO CO	Clone- Clone	h6b2	7.295	1698.948	204.184	4095	11.751
Ecad MO CO	Clone- Clone	h6b2	7.295	1446.299	214.954	4095	11.751
Ecad MO CO	Clone- Clone	h6b2	7.295	1032.344	124.086	4095	11.751
Ecad MO CO	Clone- Clone	h6b2	7.295	457.757	103.886	3249.571	11.751
Ecad MO CO	Clone- Clone
Ecad MO CO	Clone- Clone	h6b3	9.564	834.791	8.15	4095	15.463
Ecad MO CO	Clone- Clone	h6b3	8.051	1714.217	238.307	4095	12.999
Ecad MO CO	Clone- Clone	h6b3	8.051	1844.617	314.904	4095	12.999
Ecad MO CO	Clone- Clone	h6b3	8.051	1212.171	264.072	4095	12.999
Ecad MO CO	Clone- Clone	h6b3	8.051	1045.263	164.525	4095	12.999
Ecad MO CO	Clone- Clone	h6b3	8.051	911.26	203.449	4029.471	12.999
Ecad MO CO	Clone- Clone	h6b3	8.051	847.65	235.738	3091.978	12.999
Ecad MO CO	Clone- Clone
Ecad MO CO	Clone- Clone	h6b4	11.725	1113.572	34.172	4095	18.977
Ecad MO CO	Clone- Clone	h6b4	10.807	1442.584	95.583	4095	17.484
Ecad MO CO	Clone- Clone	h6b4	10.807	1382.426	101.053	4095	17.484
Ecad MO CO	Clone- Clone	h6b4	10.807	781.054	99.272	2161.247	17.484
Ecad MO CO	Clone- Clone	h6b4	10.321	1125.839	178.639	4092.589	16.692
Ecad MO CO	Clone- Clone	h6b4	10.321	1077.506	188.027	4095	16.692
Ecad MO CO	Clone- Clone	h6b4	10.321	836.954	122.526	3956.891	16.692
Ecad MO CO	Clone- Clone	h6b4	10.321	412.447	33.808	2928.761	16.692
Ecad MO CO	Clone- Clone	h6b4	10.321	249.701	26.092	902.336	16.692
Ecad MO CO	Clone- Clone
Ecad MO CO	Clone- Clone	h6b5	5.187	1040.743	55.297	4095	8.347
Ecad MO CO	Clone- Clone	h6b5	5.187	1155.85	88.728	4095	8.347
Ecad MO CO	Clone- Clone	h6b5	5.187	1265.842	172.473	4095	8.347
Ecad MO CO	Clone- Clone	h6b5	5.187	1491.278	171.822	4095	8.347
Ecad MO CO	Clone- Clone	h6b5	5.187	1689.287	214.206	4095	8.347
Ecad MO CO	Clone- Clone	h6b5	5.187	1721.307	198.748	4092.222	8.347
Ecad MO CO	Clone- Clone	h6b5	5.187	1622.949	265.573	3941.088	8.347
Ecad MO CO	Clone- Clone	h6b5	5.187	1394.594	202.347	4095	8.347
Ecad MO CO	Clone- Clone	h6b5	5.187	757.248	138.444	4042.139	8.347
Ecad MO CO	Clone- Clone
Ecad MO CO	Clone- Clone	h6b6	6.43	1544.916	67.452	4095	10.367
Ecad MO CO	Clone- Clone	h6b6	6.43	1335.529	59.114	4095	10.367
Ecad MO CO	Clone- Clone	h6b6	6.43	964.258	52.546	4095	10.367
Ecad MO CO	Clone- Clone	h6b6	8.213	1500.581	115.662	4095	13.265
Ecad MO CO	Clone- Clone	h6b6	8.213	1541.774	96.11	4095	13.265
Ecad MO CO	Clone- Clone	h6b6	8.213	1329.025	109.51	4095	13.265
Ecad MO CO	Clone- Clone	h6b6	8.213	1144.263	153.849	3711.599	13.265
Ecad MO CO	Clone- Clone	h6b6	8.213	1063.663	103.936	3814.271	13.265
Ecad MO CO	Clone- Clone
Ecad MO CO	Clone- Clone	h6b7	10.266	794.737	3.425	4095	16.605
Ecad MO CO	Clone- Clone	h6b7	10.266	747.133	25.613	4095	16.605
Ecad MO CO	Clone- Clone	h6b7	10.266	658.963	51.34	4095	16.605
Ecad MO CO	Clone- Clone	h6b7	10.266	576.979	50.098	4052.057	16.605
Ecad MO CO	Clone- Clone	h6b7	10.266	602.529	47.77	4059.872	16.605
Ecad MO CO	Clone- Clone
Ecad MO CO	Clone- Clone	h6b8	7.403	1028.992	1.64	3603.374	11.948
Ecad MO CO	Clone- Clone	h6b8	7.403	858.648	20.09	2748.316	11.948
Ecad MO CO	Clone- Clone	h6b8	7.403	588.585	25.088	2202.131	11.948
Ecad MO CO	Clone- Clone	h6b8	7.403	464.149	32.037	3590.852	11.948
Ecad MO CO	Clone- Clone	h6b8	7.078	1073.862	131.409	3846.607	11.422
Ecad MO CO	Clone- Clone	h6b8	7.078	867.128	173.681	2933.317	11.422
Ecad MO CO	Clone- Clone	h6b8	7.078	855.62	161.498	2922.009	11.422
Ecad MO CO	Clone- Clone	h6b8	7.078	829.562	154.367	4095	11.422
Ecad MO CO	Clone- Clone	h6b8	7.078	808.237	106.592	4094.148	11.422
Ecad MO CO	Clone- Clone	h6b8	7.078	548.066	77.822	2028.609	11.422
Ecad MO CO	Clone- Clone	h6b8	7.078	442.648	36.998	2559.644	11.422
Ecad MO CO	Clone- Clone
Ecad MO CO	Clone- Clone	h6b9	9.726	441.223	19.737	4048.483	15.727
Ecad MO CO	Clone- Clone	h6b9	9.726	620.698	41.5	4086.771	15.727
Ecad MO CO	Clone- Clone	h6b9	9.726	798.199	52.767	4095	15.727
Ecad MO CO	Clone- Clone	h6b9	9.726	678.014	85.237	4089.281	15.727
Ecad MO CO	Clone- Clone	h6b9	10.104	1001.843	101.195	4095	16.342
Ecad MO CO	Clone- Clone	h6b9	10.104	932.705	101.634	4095	16.342
Ecad MO CO	Clone- Clone	h6b9	10.104	825.992	86.203	3947.192	16.342
Ecad MO CO	Clone- Clone	h6b9	10.104	722.051	45.076	4095	16.342
Ecad MO CO	Clone- Clone	h6b9	10.104	414.621	24.196	2298.171	16.342
Ecad MO CO	Clone- Clone
Ecad MO CO	Clone- Clone	h6b10	7.565	1026.48	30.384	3256.49	12.212
Ecad MO CO	Clone- Clone	h6b10	7.565	942.575	50.164	3438.961	12.212
Ecad MO CO	Clone- Clone	h6b10	7.565	709.205	99.602	2064.503	12.212
Ecad MO CO	Clone- Clone	h6b10	8.429	1351.324	210.759	4095	13.615
Ecad MO CO	Clone- Clone	h6b10	8.429	1446.254	144.712	4094.013	13.615
Ecad MO CO	Clone- Clone	h6b10	8.429	1385.614	113.864	4095	13.615
Ecad MO CO	Clone- Clone	h6b10	8.429	1235.795	147.123	4095	13.615
Ecad MO CO	Clone- Clone	h6b10	8.429	971.209	141.964	4095	13.615
Ecad MO CO	Clone- Clone	h6b10	8.429	547.645	35.636	4071.343	13.615
Ecad MO CO	Clone- Clone
Ecad MO CO	Clone- Clone	h6b11	8.375	1497.861	259.151	4095	13.53
Ecad MO CO	Clone- Clone	h6b11	8.375	1127.845	171.154	4095	13.53
Ecad MO CO	Clone- Clone	h6b11	8.375	1005.518	132.693	4095	13.53
Ecad MO CO	Clone- Clone	h6b11	8.375	934.155	66.144	4095	13.53
Ecad MO CO	Clone- Clone	h6b11	8.375	805.055	33.664	4095	13.53
Ecad MO CO	Clone- Clone
Ecad MO CO	Clone- Clone	h6b12	8.429	1332.542	39.229	4095	13.618
Ecad MO CO	Clone- Clone	h6b12	8.429	1279.411	49.054	4095	13.618
Ecad MO CO	Clone- Clone	h6b12	8.429	1147.43	31.283	4095	13.618
Ecad MO CO	Clone- Clone	h6b12	9.078	1859.23	249.295	4095	14.672
Ecad MO CO	Clone- Clone	h6b12	9.078	1761.613	193.758	4095	14.672
Ecad MO CO	Clone- Clone	h6b12	9.078	1564.924	89.449	4095	14.672
Ecad MO CO	Clone- Clone	h6b12	9.078	1323.976	88.838	4095	14.672
Ecad MO CO	Clone- Clone	h6b12	9.078	848.267	68.706	3274.454	14.672
Ecad MO CO	Clone- Clone	h7b1	6.322	440.026	26.349	1346.523	10.192
Ecad MO CO	Clone- Clone	h7b1	6.322	336.15	29.08	1168.647	10.192
Ecad MO CO	Clone- Clone	h7b1	6.322	306.953	17.322	1502.275	10.192
Ecad MO CO	Clone- Clone	h7b1	6.322	284.998	7.263	1878.067	10.192
Ecad MO CO	Clone- Clone	h7b1	6.322	404.277	23.744	2759.453	10.192
Ecad MO CO	Clone- Clone	h7b1	6.322	611.456	46.114	4095	10.192
Ecad MO CO	Clone- Clone	h7b1	6.322	522.901	45.144	4095	10.192
Ecad MO CO	Clone- Clone	h7b1	6.322	360.49	50.837	2786.285	10.192
Ecad MO CO	Clone- Clone	h7b1	6.322	261.371	32.019	1248.368	10.192
Ecad MO CO	Clone- Clone	h7b1	6.322	314.366	29.927	1500.99	10.192
Ecad MO CO	Clone- Clone
Ecad MO CO	Clone- Clone	h7b2	4.215	422.825	2.105	1835.289	6.765
Ecad MO CO	Clone- Clone	h7b2	4.215	410.441	39.519	2399.648	6.765
Ecad MO CO	Clone- Clone	h7b2	4.215	405.754	36.382	2482.313	6.765
Ecad MO CO	Clone- Clone	h7b2	4.215	450.289	34.986	3070.522	6.765
Ecad MO CO	Clone- Clone	h7b2	4.215	439.149	39.999	2245.676	6.765
Ecad MO CO	Clone- Clone	h7b2	4.215	291.751	23.306	1282.083	6.765
Ecad MO CO	Clone- Clone
Ecad MO CO	Clone- Clone	h7b3	7.727	699.109	3.782	3311.864	12.476
Ecad MO CO	Clone- Clone	h7b3	7.727	606.8	53.736	4095	12.476
Ecad MO CO	Clone- Clone	h7b3	7.727	587.862	40.653	4095	12.476
Ecad MO CO	Clone- Clone	h7b3	7.727	557.016	20.458	4095	12.476
Ecad MO CO	Clone- Clone	h7b3	7.673	804.022	38.989	4095	12.388
Ecad MO CO	Clone- Clone	h7b3	7.673	587.322	67.306	3129.63	12.388
Ecad MO CO	Clone- Clone	h7b3	7.673	477.083	37.729	4095	12.388
Ecad MO CO	Clone- Clone	h7b3	7.673	414.304	60.225	4029.867	12.388
Ecad MO CO	Clone- Clone
Ecad MO CO	Clone- Clone	h7b4	6.592	858.37	1.697	4095	10.631
Ecad MO CO	Clone- Clone	h7b4	6.592	987.626	108.576	4095	10.631
Ecad MO CO	Clone- Clone	h7b4	6.592	923.146	136.877	4002.857	10.631
Ecad MO CO	Clone- Clone	h7b4	6.592	863.011	108.771	4095	10.631
Ecad MO CO	Clone- Clone	h7b4	6.592	756.183	34.388	4095	10.631
Ecad MO CO	Clone- Clone	h7b4	6.592	597.858	33.377	4095	10.631
Ecad MO CO	Clone- Clone	h7b4	6.592	405.766	42.56	3770.175	10.631
Ecad MO PO	Non Clone- Clone	h1b4	8.97	778.972	26.25	2858.483	14.497
Ecad MO PO	Non Clone- Clone	h1b4	8.97	1049.015	35.979	4095	14.497
Ecad MO PO	Non Clone- Clone	h1b4	8.97	907.88	58.514	4095	14.497
Ecad MO PO	Non Clone- Clone	h1b4	8.97	811.02	79.577	4095	14.497
Ecad MO PO	Non Clone- Clone	h1b4	8.97	642.058	55.706	4095	14.497
Ecad MO PO	Non Clone- Clone	h1b4	8.97	777.866	24.026	4095	14.497
Ecad MO PO	Non Clone- Clone	h1b4	9.78	1205.361	99.035	4095	15.815
Ecad MO PO	Non Clone- Clone	h1b4	9.78	1302.461	67.22	4082.8	15.815
Ecad MO PO	Non Clone- Clone	h1b4	9.78	1095.414	102.637	4095	15.815
Ecad MO PO	Non Clone- Clone	h1b4	9.78	815.865	46.595	4095	15.815
Ecad MO PO	Non Clone- Clone	h1b4	9.78	698.256	45.08	4090.715	15.815
Ecad MO PO	Non Clone- Clone	h1b4	9.78	677.538	58.898	4095	15.815
Ecad MO PO	Non Clone- Clone	h1b4	9.78	648.371	14.54	4095	15.815
Ecad MO PO	Non Clone- Clone
Ecad MO PO	Non Clone- Clone	h1b5	6.484	595.845	12.838	4092.857	10.454
Ecad MO PO	Non Clone- Clone	h1b5	6.484	606.44	22.137	4095	10.454
Ecad MO PO	Non Clone- Clone	h1b5	6.484	609.234	31.79	4095	10.454
Ecad MO PO	Non Clone- Clone	h1b5	6.484	685.482	37.047	4095	10.454
Ecad MO PO	Non Clone- Clone	h1b5	6.484	808.978	22.883	3760.184	10.454
Ecad MO PO	Non Clone- Clone	h1b5	6.484	683.789	17.461	2460.151	10.454
Ecad MO PO	Non Clone- Clone	h1b5	6.484	644.122	45.073	2047.626	10.454
Ecad MO PO	Non Clone- Clone	h1b5	6.484	640.114	3.034	3132.047	10.454
Ecad MO PO	Non Clone- Clone	h1b5	6.484	684.857	27.6	3861.852	10.454
Ecad MO PO	Non Clone- Clone	h1b5	6.484	605.419	56.312	2497.355	10.454
Ecad MO PO	Non Clone- Clone	h1b5	6.484	563.043	50.769	2319.383	10.454
Ecad MO PO	Non Clone- Clone
Ecad MO PO	Non Clone- Clone	h1b6	8.267	1035.564	31.85	3928.778	13.354
Ecad MO PO	Non Clone- Clone	h1b6	8.267	1053.71	95.667	4095	13.354
Ecad MO PO	Non Clone- Clone	h1b6	8.267	896.77	74.416	4095	13.354
Ecad MO PO	Non Clone- Clone	h1b6	8.267	768.906	40.895	4095	13.354
Ecad MO PO	Non Clone- Clone	h1b6	8.267	637.587	38.733	4095	13.354
Ecad MO PO	Non Clone- Clone	h1b6	8.267	523.203	13.223	2930.523	13.354
Ecad MO PO	Non Clone- Clone	h1b6	7.727	1144.847	81.377	4095	12.476
Ecad MO PO	Non Clone- Clone	h1b6	7.727	1162.122	108.566	4095	12.476
Ecad MO PO	Non Clone- Clone	h1b6	7.727	1055.72	172.983	4077.316	12.476
Ecad MO PO	Non Clone- Clone	h1b6	7.727	729.244	65.735	4048.91	12.476
Ecad MO PO	Non Clone- Clone	h1b6	7.727	450.33	13.796	2225.677	12.476
Ecad MO PO	Non Clone- Clone
Ecad MO PO	Non Clone- Clone	h1b7	14.211	919.386	18.501	4095	23.019
Ecad MO PO	Non Clone- Clone	h1b7	14.211	827.318	30.381	4095	23.019
Ecad MO PO	Non Clone- Clone	h1b7	14.211	672.432	36.499	4095	23.019
Ecad MO PO	Non Clone- Clone	h1b7	14.211	510.937	56.861	4095	23.019
Ecad MO PO	Non Clone- Clone	h1b7	14.211	441.681	7.917	4095	23.019
Ecad MO PO	Non Clone- Clone	h1b7	13.995	1034.035	49.655	4095	22.667
Ecad MO PO	Non Clone- Clone	h1b7	13.995	823.658	46.352	4095	22.667
Ecad MO PO	Non Clone- Clone	h1b7	13.995	622.194	33.102	4015.882	22.667
Ecad MO PO	Non Clone- Clone	h1b7	13.995	501.503	24.736	4095	22.667
Ecad MO PO	Non Clone- Clone	h1b7	13.995	421.005	42.328	4095	22.667
Ecad MO PO	Non Clone- Clone	h2b1	7.781	1015.544	117.995	4020.529	12.564
Ecad MO PO	Non Clone- Clone	h2b1	7.781	1155.538	130.661	4095	12.564
Ecad MO PO	Non Clone- Clone	h2b1	7.781	1874.667	209.271	4095	12.564
Ecad MO PO	Non Clone- Clone	h2b1	7.781	1644.109	211.231	4095	12.564
Ecad MO PO	Non Clone- Clone	h2b1	7.781	1213.037	291.48	3954.714	12.564
Ecad MO PO	Non Clone- Clone	h2b1	7.781	761.781	154.742	3136.878	12.564
Ecad MO PO	Non Clone- Clone
Ecad MO PO	Non Clone- Clone	h2b2	8.375	581.613	5.634	3902.967	13.53
Ecad MO PO	Non Clone- Clone	h2b2	8.375	758.457	3.239	4095	13.53
Ecad MO PO	Non Clone- Clone	h2b2	8.375	701.155	46.999	3009.295	13.53
Ecad MO PO	Non Clone- Clone	h2b2	8.375	679.527	85.934	3345.441	13.53
Ecad MO PO	Non Clone- Clone	h2b2	8.375	564.82	116.834	4095	13.53
Ecad MO PO	Non Clone- Clone	h2b2	8.375	534.454	41.374	4095	13.53
Ecad MO PO	Non Clone- Clone	h2b2	8.375	567.702	26.071	3380.739	13.53
Ecad MO PO	Non Clone- Clone	h3b1	8.916	256.559	2.133	1666.639	14.409
Ecad MO PO	Non Clone- Clone	h3b1	8.916	456.996	0.29	4086.212	14.409
Ecad MO PO	Non Clone- Clone	h3b1	9.51	672.055	80.574	3592.733	15.342
Ecad MO PO	Non Clone- Clone	h3b1	9.51	706.951	77.41	3223.779	15.342
Ecad MO PO	Non Clone- Clone	h3b1	9.51	573.646	57.16	2147.896	15.342
Ecad MO PO	Non Clone- Clone
Ecad MO PO	Non Clone- Clone	h3b2	9.078	1043.327	83.369	3559.516	14.672
Ecad MO PO	Non Clone- Clone	h3b2	9.078	1231.492	82.976	4095	14.672
Ecad MO PO	Non Clone- Clone	h3b2	9.078	1363.112	94.493	4094.781	14.672
Ecad MO PO	Non Clone- Clone	h3b2	9.078	1195.018	121.727	4068.791	14.672
Ecad MO PO	Non Clone- Clone	h3b2	9.078	764.694	119.527	4078.528	14.672
Ecad MO PO	Non Clone- Clone	h3b2	9.078	343.371	28.232	3621.372	14.672
Ecad MO PO	Non Clone- Clone
Ecad MO PO	Non Clone- Clone	h3b3	11.077	526.159	22.273	3764.877	17.923
Ecad MO PO	Non Clone- Clone	h3b3	11.077	732.944	52.011	4048.657	17.923
Ecad MO PO	Non Clone- Clone	h3b3	11.077	783.435	31.263	4095	17.923
Ecad MO PO	Non Clone- Clone	h3b3	11.077	856.742	76.405	4095	17.923
Ecad MO PO	Non Clone- Clone	h3b3	11.077	833.206	16.034	4095	17.923
Ecad MO PO	Non Clone- Clone	h4b1	7.349	735.149	10.564	4095	11.861
Ecad MO PO	Non Clone- Clone	h4b1	7.349	857.125	99.797	4095	11.861
Ecad MO PO	Non Clone- Clone	h4b1	7.349	970.725	79.899	4085.515	11.861
Ecad MO PO	Non Clone- Clone	h4b1	7.349	1028.923	82.191	4091.565	11.861
Ecad MO PO	Non Clone- Clone	h4b1	7.349	886.251	21.295	4095	11.861
Ecad MO PO	Non Clone- Clone	h4b1	7.349	610.293	19.387	4095	11.861
Ecad MO PO	Non Clone- Clone
Ecad MO PO	Non Clone- Clone	h4b2	11.077	800.482	103.363	3592.469	17.923
Ecad MO PO	Non Clone- Clone	h4b2	11.077	992.453	112.793	4094.391	17.923
Ecad MO PO	Non Clone- Clone	h4b2	11.077	1133.076	113.606	4066.808	17.923
Ecad MO PO	Non Clone- Clone	h4b2	11.077	1183.658	118.086	4095	17.923
Ecad MO PO	Non Clone- Clone	h4b2	11.077	833.625	45.023	4095	17.923
Ecad MO PO	Non Clone- Clone	h4b2	11.077	565.858	19.668	4095	17.923
Ecad MO PO	Non Clone- Clone
Ecad MO PO	Non Clone- Clone	h4b3	11.833	530.458	17.246	3053.656	19.153
Ecad MO PO	Non Clone- Clone	h4b3	11.833	702.376	38.55	2975.375	19.153
Ecad MO PO	Non Clone- Clone	h4b3	11.833	800.275	69.988	3756.131	19.153
Ecad MO PO	Non Clone- Clone	h4b3	11.833	919.214	117.312	4032.437	19.153
Ecad MO PO	Non Clone- Clone	h4b3	11.833	1097.997	142.314	4077.688	19.153
Ecad MO PO	Non Clone- Clone	h4b3	11.833	1164.976	109.375	4002.29	19.153
Ecad MO PO	Non Clone- Clone	h4b3	11.833	975.6	35.021	4095	19.153
Ecad MO PO	Non Clone- Clone
Ecad MO PO	Non Clone- Clone	h4b4	7.511	526.084	21.015	2066.759	12.122
Ecad MO PO	Non Clone- Clone	h4b4	7.511	762.135	13.078	2748.45	12.122
Ecad MO PO	Non Clone- Clone	h4b4	7.511	906.483	76.356	3798.735	12.122
Ecad MO PO	Non Clone- Clone	h4b4	7.511	1042.146	72.261	3594.542	12.122
Ecad MO PO	Non Clone- Clone	h4b4	7.511	1188.178	105.378	3960.302	12.122
Ecad MO PO	Non Clone- Clone	h4b4	7.511	1294.282	106.787	4095	12.122
Ecad MO PO	Non Clone- Clone	h4b4	7.511	1106.415	69.89	4095	12.122
Ecad MO PO	Non Clone- Clone	h4b4	7.511	883.688	96.157	4063.921	12.122
Ecad MO PO	Non Clone- Clone	h4b4	7.511	863.678	108.614	4095	12.122
Ecad MO PO	Non Clone- Clone	h5b1	10.645	1148.868	110.367	4095	17.22
Ecad MO PO	Non Clone- Clone	h5b1	10.645	1278.419	138.908	4095	17.22
Ecad MO PO	Non Clone- Clone	h5b1	10.645	1379.757	155.57	4095	17.22
Ecad MO PO	Non Clone- Clone	h5b1	10.645	1433.132	84.832	4095	17.22
Ecad MO PO	Non Clone- Clone	h5b1	10.645	1443.645	108.323	4095	17.22
Ecad MO PO	Non Clone- Clone	h5b1	10.645	1310.899	91.84	4095	17.22
Ecad MO PO	Non Clone- Clone	h5b1	10.645	1077.744	97.598	4095	17.22
Ecad MO PO	Non Clone- Clone	h5b1	10.645	949.658	63.377	4031.435	17.22
Ecad MO PO	Non Clone- Clone
Ecad MO PO	Non Clone- Clone	h5b2	6.754	834.508	25.871	3970.717	10.894
Ecad MO PO	Non Clone- Clone	h5b2	6.754	946.402	50.617	4069.635	10.894
Ecad MO PO	Non Clone- Clone	h5b2	6.754	1086.135	129.679	4042.855	10.894
Ecad MO PO	Non Clone- Clone	h5b2	6.754	1631.753	165.113	4095	10.894
Ecad MO PO	Non Clone- Clone	h5b2	6.754	1809.372	172.16	4095	10.894
Ecad MO PO	Non Clone- Clone	h5b2	6.754	1818.27	172.76	4095	10.894
Ecad MO PO	Non Clone- Clone	h5b2	6.754	1505.582	204.8	3915.08	10.894
Ecad MO PO	Non Clone- Clone	h5b2	6.754	1217.802	153.592	4095	10.894
Ecad MO PO	Non Clone- Clone
Ecad MO PO	Non Clone- Clone	h5b3	7.295	625.569	41.288	3802.347	11.773
Ecad MO PO	Non Clone- Clone	h5b3	7.295	683.925	56.511	3440.841	11.773
Ecad MO PO	Non Clone- Clone	h5b3	7.295	934.902	72.154	4095	11.773
Ecad MO PO	Non Clone- Clone	h5b3	7.295	1012.28	109.802	4095	11.773
Ecad MO PO	Non Clone- Clone	h5b3	7.295	971.579	102.613	4095	11.773
Ecad MO PO	Non Clone- Clone	h5b3	7.295	744.317	53.459	4082.939	11.773
Ecad MO PO	Non Clone- Clone	h5b3	7.295	325.616	28.841	1953.22	11.773
Ecad MO PO	Non Clone- Clone	h6b1	6.214	823.776	152.776	3552.154	10.016
Ecad MO PO	Non Clone- Clone	h6b1	6.214	688.977	148.48	3335.793	10.016
Ecad MO PO	Non Clone- Clone	h6b1	6.214	588.327	156.105	2347.324	10.016
Ecad MO PO	Non Clone- Clone	h6b1	7.727	1787.562	312.053	4095	12.476
Ecad MO PO	Non Clone- Clone	h6b1	7.727	1733.848	387.628	4095	12.476
Ecad MO PO	Non Clone- Clone	h6b1	7.727	1439.217	290.008	4095	12.476
Ecad MO PO	Non Clone- Clone	h6b1	7.727	1117.202	170.273	4094.737	12.476
Ecad MO PO	Non Clone- Clone	h6b1	11.077	1217.676	167.862	4095	17.923
Ecad MO PO	Non Clone- Clone
Ecad MO PO	Non Clone- Clone	h6b2	6.268	1322.905	89.283	4095	10.104
Ecad MO PO	Non Clone- Clone	h6b2	6.268	1470.744	172.324	4095	10.104
Ecad MO PO	Non Clone- Clone	h6b2	6.268	1624.656	161.742	4095	10.104
Ecad MO PO	Non Clone- Clone	h6b2	6.268	1438.537	231.288	4093.841	10.104
Ecad MO PO	Non Clone- Clone	h6b2	6.268	870.179	136.746	2957.67	10.104
Ecad MO PO	Non Clone- Clone	h6b2	6.268	789.094	238.145	2526.029	10.104
Ecad MO PO	Non Clone- Clone	h6b2	6.268	770.434	209.101	3116.841	10.104
Ecad MO PO	Non Clone- Clone	h6b2	6.268	759.444	147.504	3660.9	10.104
Ecad MO PO	Non Clone- Clone	h7b1	8.645	487.165	33.331	1814.917	13.97
Ecad MO PO	Non Clone- Clone	h7b1	8.645	546.323	59.395	3243.911	13.97
Ecad MO PO	Non Clone- Clone	h7b1	8.645	556.987	96.33	3922.759	13.97
Ecad MO PO	Non Clone- Clone	h7b1	8.645	626.131	60.177	3387.091	13.97
Ecad MO PO	Non Clone- Clone	h7b1	8.645	701.971	122.638	3749.141	13.97
Ecad MO PO	Non Clone- Clone	h7b1	8.645	611.711	97.915	3104.612	13.97
Ecad MO PO	Non Clone- Clone	h7b1	8.645	676.622	77.462	4095	13.97
Ecad MO PO	Non Clone- Clone	h7b1	8.645	749.47	115.997	3887.433	13.97
Ecad MO PO	Non Clone- Clone
Ecad MO PO	Non Clone- Clone	h7b2	6.646	685.858	54.474	4095	10.719
Ecad MO PO	Non Clone- Clone	h7b2	6.646	760.133	61.516	4095	10.719
Ecad MO PO	Non Clone- Clone	h7b2	6.646	897.841	51.7	4095	10.719
Ecad MO PO	Non Clone- Clone	h7b2	6.646	937.668	63.298	4095	10.719
Ecad MO PO	Non Clone- Clone	h7b2	6.646	898.573	100.611	4095	10.719
Ecad MO PO	Non Clone- Clone	h7b2	6.646	691.127	57.151	3515.611	10.719
Ecad MO PO	Non Clone- Clone	h7b2	6.646	369.878	51.47	1527.471	10.719
Ecad MO PO	Non Clone- Clone	h7b2	6.646	193.44	31.768	895.011	10.719
Ecad MO NO	Non Clone- Non Clone	h1b8	9.618	1039.507	96.915	3167.765	15.551
Ecad MO NO	Non Clone- Non Clone	h1b8	9.618	1646.345	228.068	4095	15.551
Ecad MO NO	Non Clone- Non Clone	h1b8	9.618	1542.895	265.35	4095	15.551
Ecad MO NO	Non Clone- Non Clone	h1b8	9.618	1346.817	163.145	4095	15.551
Ecad MO NO	Non Clone- Non Clone	h1b8	9.618	1206.117	116.551	4095	15.551
Ecad MO NO	Non Clone- Non Clone	h1b8	9.618	1048.51	30.33	4095	15.551
Ecad MO NO	Non Clone- Non Clone	h1b8	9.348	1269.439	87.14	4095	15.112
Ecad MO NO	Non Clone- Non Clone	h1b8	9.348	1887.343	158.981	4095	15.112
Ecad MO NO	Non Clone- Non Clone	h1b8	9.348	1519.828	198.118	4095	15.112
Ecad MO NO	Non Clone- Non Clone	h1b8	9.348	1177.236	180.815	4095	15.112
Ecad MO NO	Non Clone- Non Clone	h1b8	9.348	784.403	41.981	4095	15.112
Ecad MO NO	Non Clone- Non Clone
Ecad MO NO	Non Clone- Non Clone	h1b9	12.806	1045.94	92.188	2853.329	20.735
Ecad MO NO	Non Clone- Non Clone	h1b9	12.806	1416.852	201.503	4095	20.735
Ecad MO NO	Non Clone- Non Clone	h1b9	12.806	1212.849	189.571	4095	20.735
Ecad MO NO	Non Clone- Non Clone	h1b9	12.806	1133.976	140.614	4095	20.735
Ecad MO NO	Non Clone- Non Clone	h1b9	12.806	1116.286	112.248	4095	20.735
Ecad MO NO	Non Clone- Non Clone	h1b9	12.806	1033.62	95.643	4095	20.735
Ecad MO NO	Non Clone- Non Clone	h1b9	12.806	855.984	70.512	4095	20.735
Ecad MO NO	Non Clone- Non Clone	h1b9	12.86	1335.963	91.508	4095	20.823
Ecad MO NO	Non Clone- Non Clone	h1b9	12.86	990.627	60.851	4095	20.823
Ecad MO NO	Non Clone- Non Clone	h1b9	12.86	791.976	20.616	4077.958	20.823
Ecad MO NO	Non Clone- Non Clone	h1b9	12.86	688.837	9.396	4095	20.823
Ecad MO NO	Non Clone- Non Clone	h1b9	12.86	546.641	1.668	4095	20.823
Ecad MO NO	Non Clone- Non Clone
Ecad MO NO	Non Clone- Non Clone	h1b10	8.916	912.586	34.1	2329.351	14.409
Ecad MO NO	Non Clone- Non Clone	h1b10	8.916	1336.221	35.369	4088.789	14.409
Ecad MO NO	Non Clone- Non Clone	h1b10	8.916	1198.272	129.961	4095	14.409
Ecad MO NO	Non Clone- Non Clone	h1b10	8.916	1101.842	100.345	4095	14.409
Ecad MO NO	Non Clone- Non Clone	h1b10	8.916	1058.282	73.246	4095	14.409
Ecad MO NO	Non Clone- Non Clone	h1b10	8.916	987.827	30.409	4095	14.409
Ecad MO NO	Non Clone- Non Clone	h1b10	8.916	958.187	57.109	3997.171	14.409
Ecad MO NO	Non Clone- Non Clone	h1b10	8.916	1088.412	58.455	3817.469	14.409
Ecad MO NO	Non Clone- Non Clone	h1b10	8.916	1051.997	37.136	4095	14.409
Ecad MO NO	Non Clone- Non Clone	h1b10	8.916	842.034	78.642	4093.354	14.409
Ecad MO NO	Non Clone- Non Clone	h1b10	8.916	609.484	70.839	3535.302	14.409
Ecad MO NO	Non Clone- Non Clone
Ecad MO NO	Non Clone- Non Clone	h1b11	9.24	955.182	46.122	2854.314	14.936
Ecad MO NO	Non Clone- Non Clone	h1b11	9.24	1273.137	17.55	4095	14.936
Ecad MO NO	Non Clone- Non Clone	h1b11	9.24	1093.687	84.343	4095	14.936
Ecad MO NO	Non Clone- Non Clone	h1b11	9.24	952.423	86.308	4095	14.936
Ecad MO NO	Non Clone- Non Clone	h1b11	9.24	894.595	63.686	4095	14.936
Ecad MO NO	Non Clone- Non Clone	h1b11	9.24	837.25	40.876	4095	14.936
Ecad MO NO	Non Clone- Non Clone	h1b11	9.24	1265.821	80.4	4095	14.936
Ecad MO NO	Non Clone- Non Clone	h1b11	9.24	958.981	48.422	4095	14.936
Ecad MO NO	Non Clone- Non Clone	h1b11	9.348	1648.875	130.083	4095	15.112
Ecad MO NO	Non Clone- Non Clone	h1b11	9.348	1417.241	162.3	4095	15.112
Ecad MO NO	Non Clone- Non Clone	h1b11	9.348	1151.278	117.002	4095	15.112
Ecad MO NO	Non Clone- Non Clone	h1b11	9.348	808.462	60.563	4095	15.112
Ecad MO NO	Non Clone- Non Clone	h1b11	9.348	546.61	62.407	3914.336	15.112
Ecad MO NO	Non Clone- Non Clone
Ecad MO NO	Non Clone- Non Clone	h1b12	10.591	1002.597	3.374	3027.785	17.132
Ecad MO NO	Non Clone- Non Clone	h1b12	10.591	1203.092	1.187	4095	17.132
Ecad MO NO	Non Clone- Non Clone	h1b12	10.591	767.595	24.101	4095	17.132
Ecad MO NO	Non Clone- Non Clone	h1b12	10.591	656.377	37.254	4095	17.132
Ecad MO NO	Non Clone- Non Clone	h1b12	10.591	618.109	6.675	4095	17.132
Ecad MO NO	Non Clone- Non Clone	h1b12	10.429	1084.296	43.782	4095	16.869
Ecad MO NO	Non Clone- Non Clone	h1b12	10.429	1121.045	40.324	4095	16.869
Ecad MO NO	Non Clone- Non Clone	h1b12	10.429	921.07	35.844	4063.972	16.869
Ecad MO NO	Non Clone- Non Clone	h1b12	10.429	805.455	51.69	4095	16.869
Ecad MO NO	Non Clone- Non Clone	h1b12	10.591	771.796	73.257	4095	17.132
Ecad MO NO	Non Clone- Non Clone	h2b3	15.508	449.079	16.217	1584.737	25.128
Ecad MO NO	Non Clone- Non Clone	h2b3	15.508	674.832	22.341	3171.245	25.128
Ecad MO NO	Non Clone- Non Clone	h2b3	15.508	781.794	35.359	3474.438	25.128
Ecad MO NO	Non Clone- Non Clone	h2b3	15.508	720.852	38.985	4095	25.128
Ecad MO NO	Non Clone- Non Clone	h2b3	15.508	755.375	13.203	4095	25.128
Ecad MO NO	Non Clone- Non Clone	h2b3	15.508	740.649	51.763	4045.867	25.128
Ecad MO NO	Non Clone- Non Clone	h2b3	15.508	674.863	29.057	3761.719	25.128
Ecad MO NO	Non Clone- Non Clone	h2b3	15.508	558.255	71.904	4094.677	25.128
Ecad MO NO	Non Clone- Non Clone
Ecad MO NO	Non Clone- Non Clone	h2b4	8.429	1123.752	43.659	4095	13.618
Ecad MO NO	Non Clone- Non Clone	h2b4	8.429	1153.587	64.365	4095	13.618
Ecad MO NO	Non Clone- Non Clone	h2b4	8.429	1650.666	109.916	4095	13.618
Ecad MO NO	Non Clone- Non Clone	h2b4	8.429	1579.936	59.68	4095	13.618
Ecad MO NO	Non Clone- Non Clone	h2b4	8.429	1295.206	96.144	4095	13.618
Ecad MO NO	Non Clone- Non Clone	h2b4	8.429	935.181	65.636	4095	13.618
Ecad MO NO	Non Clone- Non Clone	h2b4	8.429	617.712	22.261	4095	13.618
Ecad MO NO	Non Clone- Non Clone
Ecad MO NO	Non Clone- Non Clone	h2b5	6.322	1164.054	59.917	4095	10.192
Ecad MO NO	Non Clone- Non Clone	h2b5	6.322	1085.081	132.177	4095	10.192
Ecad MO NO	Non Clone- Non Clone	h2b5	6.322	1141.804	41.312	4095	10.192
Ecad MO NO	Non Clone- Non Clone	h2b5	6.322	987.806	85.926	4007.056	10.192
Ecad MO NO	Non Clone- Non Clone	h2b5	6.322	731.814	48.335	4094.438	10.192
Ecad MO NO	Non Clone- Non Clone	h2b5	6.322	454.294	58.348	2530.025	10.192
Ecad MO NO	Non Clone- Non Clone
Ecad MO NO	Non Clone- Non Clone	h2b6	12.158	927.635	79.984	2838.167	19.679
Ecad MO NO	Non Clone- Non Clone	h2b6	12.158	1103.852	132.026	3331.921	19.679
Ecad MO NO	Non Clone- Non Clone	h2b6	12.158	1124.348	175.672	3657.303	19.679
Ecad MO NO	Non Clone- Non Clone	h2b6	12.158	1237.454	225.504	4082.07	19.679
Ecad MO NO	Non Clone- Non Clone	h2b6	12.158	1073.692	220.99	4095	19.679
Ecad MO NO	Non Clone- Non Clone	h2b6	12.158	887.716	213.643	4095	19.679
Ecad MO NO	Non Clone- Non Clone	h2b6	12.158	703.886	128.431	4090.181	19.679
Ecad MO NO	Non Clone- Non Clone
Ecad MO NO	Non Clone- Non Clone	h2b7	7.078	624.747	19.482	2718.55	11.421
Ecad MO NO	Non Clone- Non Clone	h2b7	7.078	681.398	28.204	4095	11.421
Ecad MO NO	Non Clone- Non Clone	h2b7	7.078	707.127	31.035	4095	11.421
Ecad MO NO	Non Clone- Non Clone	h2b7	7.078	845.146	57.571	3947.719	11.421
Ecad MO NO	Non Clone- Non Clone	h2b7	7.078	713.62	48.073	3532.754	11.421
Ecad MO NO	Non Clone- Non Clone	h2b7	7.078	579.599	25.997	3979.779	11.421
Ecad MO NO	Non Clone- Non Clone	h2b7	7.078	461.777	49.295	4088.486	11.421
Ecad MO NO	Non Clone- Non Clone
Ecad MO NO	Non Clone- Non Clone	h2b8	7.024	637.076	86.881	2061.877	11.334
Ecad MO NO	Non Clone- Non Clone	h2b8	7.024	850.604	103.846	2312.904	11.334
Ecad MO NO	Non Clone- Non Clone	h2b8	7.024	1201.292	156.645	3699.899	11.334
Ecad MO NO	Non Clone- Non Clone	h2b8	7.024	1827.675	180.671	4095	11.334
Ecad MO NO	Non Clone- Non Clone	h2b8	7.024	1514.185	112.889	4095	11.334
Ecad MO NO	Non Clone- Non Clone	h2b8	7.024	1110.139	185.193	3844.471	11.334
Ecad MO NO	Non Clone- Non Clone	h2b8	7.024	698.304	80.262	2771.684	11.334
Ecad MO NO	Non Clone- Non Clone	h3b1	5.998	1330.079	204.634	4095	9.664
Ecad MO NO	Non Clone- Non Clone	h3b1	5.998	1159.879	172.597	4044.797	9.664
Ecad MO NO	Non Clone- Non Clone	h3b1	5.998	852.95	140.855	2477.016	9.664
Ecad MO NO	Non Clone- Non Clone	h3b1	6.16	1478.621	133.331	4095	9.928
Ecad MO NO	Non Clone- Non Clone	h3b1	6.16	1160.847	74.3	3885.077	9.928
Ecad MO NO	Non Clone- Non Clone	h3b1	6.16	975.465	64.487	3362.054	9.928
Ecad MO NO	Non Clone- Non Clone	h3b1	6.16	890.338	35.348	3993.542	9.928
Ecad MO NO	Non Clone- Non Clone
Ecad MO NO	Non Clone- Non Clone	h3b2	9.888	657.417	23.407	4095	15.99
Ecad MO NO	Non Clone- Non Clone	h3b2	9.888	696.297	33.373	4092.545	15.99
Ecad MO NO	Non Clone- Non Clone	h3b2	9.888	772.328	110.372	3321.512	15.99
Ecad MO NO	Non Clone- Non Clone	h3b2	9.888	949.581	95.329	3222.932	15.99
Ecad MO NO	Non Clone- Non Clone	h3b2	9.888	777.021	36.839	3695.773	15.99
Ecad MO NO	Non Clone- Non Clone
Ecad MO NO	Non Clone- Non Clone	h3b3	11.725	502.926	0	1804.699	18.977
Ecad MO NO	Non Clone- Non Clone	h3b3	11.725	579.446	0	1902.671	18.977
Ecad MO NO	Non Clone- Non Clone	h3b3	12.104	677.519	103.722	2310.622	19.583
Ecad MO NO	Non Clone- Non Clone	h3b3	12.104	805.373	137.912	4095	19.583
Ecad MO NO	Non Clone- Non Clone	h3b3	12.104	801.813	55.455	4095	19.583
Ecad MO NO	Non Clone- Non Clone	h3b3	12.104	816.869	20.758	4095	19.583
Ecad MO NO	Non Clone- Non Clone
Ecad MO NO	Non Clone- Non Clone	h3b4	10.429	741.669	65.176	4095	16.869
Ecad MO NO	Non Clone- Non Clone	h3b4	10.429	818.048	69.36	4095	16.869
Ecad MO NO	Non Clone- Non Clone	h3b4	10.429	814.114	75.87	4095	16.869
Ecad MO NO	Non Clone- Non Clone	h3b4	10.429	769.238	60.511	3931.922	16.869
Ecad MO NO	Non Clone- Non Clone	h3b4	11.563	905.615	133.109	3834.279	18.714
Ecad MO NO	Non Clone- Non Clone	h3b4	11.563	1164.671	155.024	4095	18.714
Ecad MO NO	Non Clone- Non Clone	h3b4	11.563	1116.117	193.305	4093.285	18.714
Ecad MO NO	Non Clone- Non Clone	h3b4	11.293	1110.787	65.976	3812.555	18.275
Ecad MO NO	Non Clone- Non Clone
Ecad MO NO	Non Clone- Non Clone	h3b5	7.565	1488.324	285.066	4095	12.212
Ecad MO NO	Non Clone- Non Clone	h3b5	7.565	1605.812	448.693	4094.637	12.212
Ecad MO NO	Non Clone- Non Clone	h3b5	7.565	1620.32	462.669	3705.412	12.212
Ecad MO NO	Non Clone- Non Clone	h3b5	7.565	1329.897	237.546	3430.658	12.212
Ecad MO NO	Non Clone- Non Clone	h3b5	7.565	824.164	106.268	4095	12.212
Ecad MO NO	Non Clone- Non Clone	h3b5	7.565	703.51	46.179	4095	12.212
Ecad MO NO	Non Clone- Non Clone	h4b5	8.051	733.641	45.125	3952.897	13.003
Ecad MO NO	Non Clone- Non Clone	h4b5	8.051	313.335	32.817	1607.048	13.003
Ecad MO NO	Non Clone- Non Clone	h4b5	8.051	733.641	45.125	3952.897	13.003
Ecad MO NO	Non Clone- Non Clone	h4b5	8.051	1066.164	42.659	4095	13.003
Ecad MO NO	Non Clone- Non Clone	h4b5	8.051	1027.684	122.581	4095	13.003
Ecad MO NO	Non Clone- Non Clone	h4b5	8.051	1123.229	129.76	4095	13.003
Ecad MO NO	Non Clone- Non Clone	h4b5	8.051	1203.237	143.821	4095	13.003
Ecad MO NO	Non Clone- Non Clone	h4b5	8.051	1308.336	196.525	4089.327	13.003
Ecad MO NO	Non Clone- Non Clone	h4b5	8.051	1342.303	178.065	4095	13.003
Ecad MO NO	Non Clone- Non Clone
Ecad MO NO	Non Clone- Non Clone	h4b6	9.834	344.18	0.075	1876.971	15.901
Ecad MO NO	Non Clone- Non Clone	h4b6	9.834	547.441	0.53	2389.855	15.901
Ecad MO NO	Non Clone- Non Clone	h4b6	9.834	511.192	3.526	2266.135	15.901
Ecad MO NO	Non Clone- Non Clone	h4b6	9.834	544.37	12.115	3656.116	15.901
Ecad MO NO	Non Clone- Non Clone	h4b6	9.834	604.929	15.462	4012.429	15.901
Ecad MO NO	Non Clone- Non Clone	h4b6	9.834	715.051	12.616	3131.665	15.901
Ecad MO NO	Non Clone- Non Clone
Ecad MO NO	Non Clone- Non Clone	h4b7	13.022	512.849	3.97	2308.332	21.086
Ecad MO NO	Non Clone- Non Clone	h4b7	13.022	761.042	19.516	4095	21.086
Ecad MO NO	Non Clone- Non Clone	h4b7	13.022	674.833	28.161	4095	21.086
Ecad MO NO	Non Clone- Non Clone	h4b7	13.022	639.188	29.948	4090.208	21.086
Ecad MO NO	Non Clone- Non Clone	h4b7	13.022	628.411	49.173	3909.903	21.086
Ecad MO NO	Non Clone- Non Clone	h4b7	13.022	649.287	47.816	4095	21.086
Ecad MO NO	Non Clone- Non Clone	h4b7	13.022	766.819	95.249	2666.72	21.086
Ecad MO NO	Non Clone- Non Clone
Ecad MO NO	Non Clone- Non Clone	h4b8	8.159	774.048	48.049	3162.369	13.179
Ecad MO NO	Non Clone- Non Clone	h4b8	8.159	933.176	123.725	4089.241	13.179
Ecad MO NO	Non Clone- Non Clone	h4b8	8.159	901.933	75.416	4095	13.179
Ecad MO NO	Non Clone- Non Clone	h4b8	8.159	760.082	65.576	4086.795	13.179
Ecad MO NO	Non Clone- Non Clone	h4b8	8.159	532.078	38.181	3739.558	13.179
Ecad MO NO	Non Clone- Non Clone	h4b8	8.159	417.773	29.647	2139.27	13.179
Ecad MO NO	Non Clone- Non Clone	h4b8	8.159	492.485	15.114	4001.993	13.179
Ecad MO NO	Non Clone- Non Clone	h4b8	8.159	517.666	5.198	4095	13.179
Ecad MO NO	Non Clone- Non Clone
Ecad MO NO	Non Clone- Non Clone	h4b9	12.86	715.191	60.376	2997.724	20.823
Ecad MO NO	Non Clone- Non Clone	h4b9	12.86	793.701	104.499	4038.679	20.823
Ecad MO NO	Non Clone- Non Clone	h4b9	12.86	848.827	85.012	4095	20.823
Ecad MO NO	Non Clone- Non Clone	h4b9	12.86	895.148	125.972	4032.167	20.823
Ecad MO NO	Non Clone- Non Clone	h4b9	12.86	933.433	157.734	4095	20.823
Ecad MO NO	Non Clone- Non Clone	h4b9	12.86	733.905	117.514	3681.236	20.823
Ecad MO NO	Non Clone- Non Clone
Ecad MO NO	Non Clone- Non Clone	h4b10	4.053	316.464	40.121	1136.283	6.502
Ecad MO NO	Non Clone- Non Clone	h4b10	4.053	728.707	63.71	4095	6.502
Ecad MO NO	Non Clone- Non Clone	h4b10	4.053	841.137	74.998	4095	6.502
Ecad MO NO	Non Clone- Non Clone	h4b10	4.053	893.881	102.736	4095	6.502
Ecad MO NO	Non Clone- Non Clone	h4b10	4.053	905.599	153.164	4093.007	6.502
Ecad MO NO	Non Clone- Non Clone	h4b10	4.053	704.188	131.793	2889.889	6.502
Ecad MO NO	Non Clone- Non Clone	h4b10	4.053	461.178	57.03	2238.26	6.502
Ecad MO NO	Non Clone- Non Clone	h5b1	9.348	769.368	88.251	2081.946	15.112
Ecad MO NO	Non Clone- Non Clone	h5b1	9.348	848.63	53.139	2986.73	15.112
Ecad MO NO	Non Clone- Non Clone	h5b1	9.348	1050.5	68.566	4021.349	15.112
Ecad MO NO	Non Clone- Non Clone	h5b1	9.348	1207.138	194.688	4095	15.112
Ecad MO NO	Non Clone- Non Clone	h5b1	9.348	1098.598	167.385	4095	15.112
Ecad MO NO	Non Clone- Non Clone	h5b1	9.348	922.808	140.245	4095	15.112
Ecad MO NO	Non Clone- Non Clone
Ecad MO NO	Non Clone- Non Clone	h5b2	5.836	797.783	73.351	3535.236	9.401
Ecad MO NO	Non Clone- Non Clone	h5b2	5.836	1053.658	186.857	4095	9.401
Ecad MO NO	Non Clone- Non Clone	h5b2	5.836	1297.216	192.226	4095	9.401
Ecad MO NO	Non Clone- Non Clone	h5b2	5.836	1503.885	293.507	4095	9.401
Ecad MO NO	Non Clone- Non Clone	h5b2	5.836	1680.044	279.089	4095	9.401
Ecad MO NO	Non Clone- Non Clone	h5b2	5.836	1655.279	207.291	4095	9.401
Ecad MO NO	Non Clone- Non Clone	h5b2	5.836	1405.456	131.259	4095	9.401
Ecad MO NO	Non Clone- Non Clone
Ecad MO NO	Non Clone- Non Clone	h5b3	8.537	1157.243	75.265	4095	13.794
Ecad MO NO	Non Clone- Non Clone	h5b3	8.537	1541.808	143.72	4095	13.794
Ecad MO NO	Non Clone- Non Clone	h5b3	8.537	2025.045	212.317	4095	13.794
Ecad MO NO	Non Clone- Non Clone	h5b3	8.537	2211.288	282.116	4095	13.794
Ecad MO NO	Non Clone- Non Clone	h5b3	8.537	2223.73	317.618	4095	13.794
Ecad MO NO	Non Clone- Non Clone	h5b3	8.537	1788.115	215.718	4095	13.794
Ecad MO NO	Non Clone- Non Clone	h5b3	8.537	843.22	100.052	3743.524	13.794
Ecad MO NO	Non Clone- Non Clone	h5b3	8.537	557.221	80.939	4032.842	13.794
Ecad MO NO	Non Clone- Non Clone
Ecad MO NO	Non Clone- Non Clone	h5b4	14.049	954.177	90.344	3743.343	22.755
Ecad MO NO	Non Clone- Non Clone	h5b4	14.049	1215.322	148.089	4091.736	22.755
Ecad MO NO	Non Clone- Non Clone	h5b4	14.049	1534.072	138.846	4095	22.755
Ecad MO NO	Non Clone- Non Clone	h5b4	14.049	1551.734	219.459	4095	22.755
Ecad MO NO	Non Clone- Non Clone	h5b4	14.049	1311.283	241.581	4095	22.755
Ecad MO NO	Non Clone- Non Clone	h5b4	14.049	976.186	164.792	4095	22.755
Ecad MO NO	Non Clone- Non Clone	h5b4	14.049	770.226	124.344	4095	22.755
Ecad MO NO	Non Clone- Non Clone
Ecad MO NO	Non Clone- Non Clone	h5b5	13.13	442.451	1.372	2719.921	21.262
Ecad MO NO	Non Clone- Non Clone	h5b5	13.13	441.794	18.113	3008.714	21.262
Ecad MO NO	Non Clone- Non Clone	h5b5	13.13	433.416	19.252	3682.595	21.262
Ecad MO NO	Non Clone- Non Clone	h5b5	13.13	489.828	34.512	3448.34	21.262
Ecad MO NO	Non Clone- Non Clone	h5b5	13.13	507.37	18.888	3461.104	21.262
Ecad MO NO	Non Clone- Non Clone	h5b5	13.13	474.119	40.351	3933.737	21.262
Ecad MO NO	Non Clone- Non Clone	h6b1	10.753	1461.707	60.192	4095	17.396
Ecad MO NO	Non Clone- Non Clone	h6b1	10.753	1543.18	68.462	4095	17.396
Ecad MO NO	Non Clone- Non Clone	h6b1	10.753	1730.288	117.314	4095	17.396
Ecad MO NO	Non Clone- Non Clone	h6b1	10.753	1939.004	144.212	4095	17.396
Ecad MO NO	Non Clone- Non Clone	h6b1	10.753	2038.274	50.065	4095	17.396
Ecad MO NO	Non Clone- Non Clone	h6b1	10.753	1896.024	129.058	4095	17.396
Ecad MO NO	Non Clone- Non Clone	h6b1	10.753	1406.399	142.679	4095	17.396
Ecad MO NO	Non Clone- Non Clone	h6b1	10.753	912.823	46.149	4095	17.396
Ecad MO NO	Non Clone- Non Clone
Ecad MO NO	Non Clone- Non Clone	h6b2	7.565	1441.955	193.275	4095	12.212
Ecad MO NO	Non Clone- Non Clone	h6b2	7.565	1569.277	347.112	4095	12.212
Ecad MO NO	Non Clone- Non Clone	h6b2	7.565	1503.107	277.871	4095	12.212
Ecad MO NO	Non Clone- Non Clone	h6b2	7.565	1130.289	148.59	4095	12.212
Ecad MO NO	Non Clone- Non Clone	h6b2	5.836	1218.346	140.465	3807.057	9.401
Ecad MO NO	Non Clone- Non Clone	h6b2	5.836	1071.31	102.788	3361.667	9.401
Ecad MO NO	Non Clone- Non Clone	h6b2	5.836	849.644	88.722	2551.13	9.401
Ecad MO NO	Non Clone- Non Clone
Ecad MO NO	Non Clone- Non Clone	h6b3	9.834	809.148	31.36	2897.535	15.902
Ecad MO NO	Non Clone- Non Clone	h6b3	9.834	912.872	49.543	3607.459	15.902
Ecad MO NO	Non Clone- Non Clone	h6b3	9.834	1011.386	42.579	4095	15.902
Ecad MO NO	Non Clone- Non Clone	h6b3	9.834	1194.901	148.02	4095	15.902
Ecad MO NO	Non Clone- Non Clone	h6b3	9.834	1351.66	156.336	4095	15.902
Ecad MO NO	Non Clone- Non Clone	h6b3	9.834	1330.118	153.254	4095	15.902
Ecad MO NO	Non Clone- Non Clone	h6b3	9.834	1202.661	116.057	4094.939	15.902
Ecad MO NO	Non Clone- Non Clone
Ecad MO NO	Non Clone- Non Clone	h6b4	6.754	830.768	73.772	4095	10.894
Ecad MO NO	Non Clone- Non Clone	h6b4	6.754	746.896	105.834	4095	10.894
Ecad MO NO	Non Clone- Non Clone	h6b4	6.754	762.538	133.794	4089.752	10.894
Ecad MO NO	Non Clone- Non Clone	h6b4	6.754	743.846	93.881	4095	10.894
Ecad MO NO	Non Clone- Non Clone	h6b4	6.754	648.891	51.162	4072.052	10.894
Ecad MO NO	Non Clone- Non Clone	h6b4	6.754	494.923	22.197	2014.058	10.894
Ecad MO NO	Non Clone- Non Clone	h7b1	10.753	657.971	64.794	3717.394	17.396
Ecad MO NO	Non Clone- Non Clone	h7b1	10.753	829.076	75.478	3820.136	17.396
Ecad MO NO	Non Clone- Non Clone	h7b1	10.753	1137.676	113.408	3926.954	17.396
Ecad MO NO	Non Clone- Non Clone	h7b1	10.753	1150.318	130.508	4095	17.396
Ecad MO NO	Non Clone- Non Clone	h7b1	10.753	986.188	84.255	4095	17.396
Ecad MO NO	Non Clone- Non Clone	h7b1	10.753	811.811	46.519	4095	17.396
Ecad MO NO	Non Clone- Non Clone	h7b1	10.753	584.713	26.554	4095	17.396
Ecad MO NO	Non Clone- Non Clone
Ecad MO NO	Non Clone- Non Clone	h7b2	11.023	636.998	31.695	4091.756	17.835
Ecad MO NO	Non Clone- Non Clone	h7b2	11.023	741.283	35.896	3944.556	17.835
Ecad MO NO	Non Clone- Non Clone	h7b2	11.023	784.684	28.38	4071.546	17.835
Ecad MO NO	Non Clone- Non Clone	h7b2	11.023	862.679	66.956	4095	17.835
Ecad MO NO	Non Clone- Non Clone	h7b2	11.023	830.222	80.429	3614.846	17.835
Ecad MO NO	Non Clone- Non Clone	h7b2	11.023	601.274	83.697	2691.466	17.835
Ecad MO NO	Non Clone- Non Clone	h7b2	11.023	438.115	47.095	4095	17.835
Ecad MO NO	Non Clone- Non Clone
Ecad MO NO	Non Clone- Non Clone	h7b3	8.808	479.275	30.759	1549.789	14.233
Ecad MO NO	Non Clone- Non Clone	h7b3	8.808	592.283	88.878	1897.414	14.233
Ecad MO NO	Non Clone- Non Clone	h7b3	8.808	611.919	93.03	2245.676	14.233
Ecad MO NO	Non Clone- Non Clone	h7b3	8.808	709.697	112.142	3080.124	14.233
Ecad MO NO	Non Clone- Non Clone	h7b3	8.808	818.307	74.489	3457.268	14.233
Ecad MO NO	Non Clone- Non Clone	h7b3	8.808	932.509	50.766	4095	14.233
Ecad MO NO	Non Clone- Non Clone	h7b3	8.808	940.069	99.624	4095	14.233
Ecad MO NO	Non Clone- Non Clone	h7b3	8.808	838.294	38.879	4095	14.233
Ecad MO NO	Non Clone- Non Clone	h7b3	8.808	731.848	18.998	3800.49	14.233
Ecad MO NO	Non Clone- Non Clone	h7b3	8.808	636.136	16.539	3803.713	14.233
Ecad MO NO	Non Clone- Non Clone
Ecad MO NO	Non Clone- Non Clone	h7b4	9.942	699.571	60.531	4061.035	16.078
Ecad MO NO	Non Clone- Non Clone	h7b4	9.942	769.645	43.882	4063.24	16.078
Ecad MO NO	Non Clone- Non Clone	h7b4	9.942	818.934	33.313	4086.256	16.078
Ecad MO NO	Non Clone- Non Clone	h7b4	9.942	1043.406	81.849	3805.631	16.078
Ecad MO NO	Non Clone- Non Clone	h7b4	9.942	1034.172	89.756	3919.936	16.078
Ecad MO NO	Non Clone- Non Clone	h7b4	9.942	863.967	85.323	4095	16.078
Ecad MO NO	Non Clone- Non Clone	h7b4	9.942	609.561	43.629	4095	16.078
Ecad MO NO	Non Clone- Non Clone	h7b4	9.942	334.788	23.067	4095	16.078
Ecad MO NO	Non Clone- Non Clone
Ecad MO NO	Non Clone- Non Clone	h7b5	7.727	329.469	3.136	1570.227	12.476
Ecad MO NO	Non Clone- Non Clone	h7b5	7.727	432.614	2.028	1505.26	12.476
Ecad MO NO	Non Clone- Non Clone	h7b5	7.727	461.453	20.832	2009.961	12.476
Ecad MO NO	Non Clone- Non Clone	h7b5	8.645	600.098	50.464	2059.874	13.969
Ecad MO NO	Non Clone- Non Clone	h7b5	8.645	725.025	50.546	2442.909	13.969
Ecad MO NO	Non Clone- Non Clone	h7b5	8.645	920.23	170.303	3982.127	13.969
Ecad MO NO	Non Clone- Non Clone	h7b5	8.645	612.06	41.9	2695.483	13.969
Ecad MO NO	Non Clone- Non Clone	h7b5	8.645	612.06	41.9	2695.483	13.969
Ecad MO NO	Non Clone- Non Clone	h7b5	8.645	418.427	16.36	2275.28	13.969
