# Supplementary material for: Stepwise polarisation of developing bilayered epidermis is mediated by aPKC and E-cadherin in zebrafish
Source: eLife journal article supplement (doi:10.7554/elife.49064), 2020-01-22
Supplement: fig4-figsupp2-data2 [file elife-49064-fig4-figsupp2-data2-v1.csv]

Genotype	Boundary	Cell name	Area	Mean	Min	Max	Length
Ctrl MO CO	Clone- Clone	h1b1	10.266	610.013	194.834	2404.204	16.605
Ctrl MO CO	Clone- Clone	h1b1	10.266	609.151	181.115	2904.443	16.605
Ctrl MO CO	Clone- Clone	h1b1	10.266	531.413	156.282	2213.909	16.605
Ctrl MO CO	Clone- Clone	h1b1	10.266	425.23	181.127	1770.431	16.605
Ctrl MO CO	Clone- Clone	h1b1	10.266	321.832	140.821	818.907	16.605
Ctrl MO CO	Clone- Clone	h1b1	10.266	281.214	120.618	788.849	16.605
Ctrl MO CO	Clone- Clone	h1b1	10.266	250.798	108.886	756.244	16.605
Ctrl MO CO	Clone- Clone	h1b1	10.266	221.164	103.232	606.317	16.605
Ctrl MO CO	Clone- Clone
Ctrl MO CO	Clone- Clone	h1b2	10.321	640.511	173.446	3958.276	16.693
Ctrl MO CO	Clone- Clone	h1b2	10.321	577.521	169.392	2475.474	16.693
Ctrl MO CO	Clone- Clone	h1b2	10.321	458.239	172.514	1567.802	16.693
Ctrl MO CO	Clone- Clone	h1b2	10.321	370.587	169.327	2954.591	16.693
Ctrl MO CO	Clone- Clone	h1b2	10.321	324.755	146.544	2881.506	16.693
Ctrl MO CO	Clone- Clone	h1b2	10.321	265.036	133.299	1364.954	16.693
Ctrl MO CO	Clone- Clone	h1b2	10.321	220.333	109.56	673.046	16.693
Ctrl MO CO	Clone- Clone
Ctrl MO CO	Clone- Clone	h1b3	10.699	474.351	139.917	3477.593	17.308
Ctrl MO CO	Clone- Clone	h1b3	10.699	423.245	125.854	2686.37	17.308
Ctrl MO CO	Clone- Clone	h1b3	10.699	344.908	138.838	2173.562	17.308
Ctrl MO CO	Clone- Clone	h1b3	10.699	270.579	121.027	878.623	17.308
Ctrl MO CO	Clone- Clone	h1b3	10.699	206.563	109.386	515.476	17.308
Ctrl MO CO	Clone- Clone
Ctrl MO CO	Clone- Clone	h1b4	9.456	634.517	152.656	3465.793	15.287
Ctrl MO CO	Clone- Clone	h1b4	9.456	616.765	186.189	1914.882	15.287
Ctrl MO CO	Clone- Clone	h1b4	9.456	529.921	197.38	1644.897	15.287
Ctrl MO CO	Clone- Clone	h1b4	9.456	432.722	149.066	1284.853	15.287
Ctrl MO CO	Clone- Clone	h1b4	9.456	336.712	166.011	1068.96	15.287
Ctrl MO CO	Clone- Clone	h1b4	9.456	293.357	136.014	1017.649	15.287
Ctrl MO CO	Clone- Clone	h1b4	9.456	267.043	127.635	666.52	15.287
Ctrl MO CO	Clone- Clone
Ctrl MO CO	Clone- Clone	h1b5	4.971	520.545	198.701	2063.868	7.995
Ctrl MO CO	Clone- Clone	h1b5	4.971	585.293	217.364	2130.317	7.995
Ctrl MO CO	Clone- Clone	h1b5	4.971	586.388	194.419	1415.176	7.995
Ctrl MO CO	Clone- Clone	h1b5	4.971	514.837	225.374	1099.854	7.995
Ctrl MO CO	Clone- Clone	h1b5	4.971	380.691	179.348	868.712	7.995
Ctrl MO CO	Clone- Clone	h1b5	4.971	309.475	168.947	597.934	7.995
Ctrl MO CO	Clone- Clone	h1b5	4.971	263.505	128.99	567.19	7.995
Ctrl MO CO	Clone- Clone
Ctrl MO CO	Clone- Clone	h1b6	12.914	658.686	159.388	4095	20.91
Ctrl MO CO	Clone- Clone	h1b6	12.914	601.458	180.887	2724.126	20.91
Ctrl MO CO	Clone- Clone	h1b6	12.914	482.942	150.6	3727.746	20.91
Ctrl MO CO	Clone- Clone	h1b6	12.914	365.641	132.085	3007.227	20.91
Ctrl MO CO	Clone- Clone	h1b6	12.914	281.416	120.557	1133.72	20.91
Ctrl MO CO	Clone- Clone	h1b6	12.914	217.457	114.083	1343.133	20.91
Ctrl MO CO	Clone- Clone	h2b1	9.78	513.204	166.922	3147.989	15.815
Ctrl MO CO	Clone- Clone	h2b1	9.78	449.635	172.354	2518.712	15.815
Ctrl MO CO	Clone- Clone	h2b1	9.78	357.942	174.487	1244.926	15.815
Ctrl MO CO	Clone- Clone	h2b1	9.78	313.632	148.761	1054.575	15.815
Ctrl MO CO	Clone- Clone
Ctrl MO CO	Clone- Clone	h2b2	6.808	741.156	200.416	4026.151	10.982
Ctrl MO CO	Clone- Clone	h2b2	6.808	703.252	243.738	1948.321	10.982
Ctrl MO CO	Clone- Clone	h2b2	6.808	604.607	196.268	1283.3	10.982
Ctrl MO CO	Clone- Clone	h2b2	6.808	478.972	181.887	1435.018	10.982
Ctrl MO CO	Clone- Clone	h2b2	6.808	416.526	171.045	1711.246	10.982
Ctrl MO CO	Clone- Clone	h2b2	6.808	336.477	149.613	1381.337	10.982
Ctrl MO CO	Clone- Clone
Ctrl MO CO	Clone- Clone	h2b3	7.565	678.985	213.779	3988.323	12.212
Ctrl MO CO	Clone- Clone	h2b3	7.565	668.028	194.071	3676.064	12.212
Ctrl MO CO	Clone- Clone	h2b3	7.565	563.809	199.854	1718.563	12.212
Ctrl MO CO	Clone- Clone	h2b3	7.565	481.404	192.87	1101.768	12.212
Ctrl MO CO	Clone- Clone	h2b3	7.565	392.894	171.236	1265.656	12.212
Ctrl MO CO	Clone- Clone
Ctrl MO CO	Clone- Clone	h2b4	9.348	734.858	176.058	2956.086	15.112
Ctrl MO CO	Clone- Clone	h2b4	9.348	675.581	210.321	2663.253	15.112
Ctrl MO CO	Clone- Clone	h2b4	9.348	547.502	183.182	1974.594	15.112
Ctrl MO CO	Clone- Clone	h2b4	9.348	457.572	160.774	1118.028	15.112
Ctrl MO CO	Clone- Clone	h2b4	9.348	379.034	174.363	950.614	15.112
Ctrl MO CO	Clone- Clone
Ctrl MO CO	Clone- Clone	h2b5	12.428	534.901	148.976	3323.281	20.117
Ctrl MO CO	Clone- Clone	h2b5	12.428	577.263	147.443	2066.607	20.117
Ctrl MO CO	Clone- Clone	h2b5	12.428	540.733	160.49	1406.101	20.117
Ctrl MO CO	Clone- Clone	h2b5	12.428	476.32	155.293	1164.713	20.117
Ctrl MO CO	Clone- Clone	h2b5	12.428	400.813	153.927	1091.551	20.117
Ctrl MO CO	Clone- Clone	h2b5	12.428	335.868	136.239	1564.101	20.117
Ctrl MO CO	Clone- Clone
Ctrl MO CO	Clone- Clone	h2b6	7.511	533.728	147.489	3178.502	12.125
Ctrl MO CO	Clone- Clone	h2b6	7.511	528.53	176.12	2004.197	12.125
Ctrl MO CO	Clone- Clone	h2b6	7.511	460.755	156.954	1493.101	12.125
Ctrl MO CO	Clone- Clone	h2b6	7.511	401.76	164.45	982.576	12.125
Ctrl MO CO	Clone- Clone	h2b6	7.511	353.053	136.253	1157.855	12.125
Ctrl MO CO	Clone- Clone	h2b6	7.511	316.393	142.83	1256.176	12.125
Ctrl MO CO	Clone- Clone	h3b1	8.97	402.02	119.321	2064.746	14.497
Ctrl MO CO	Clone- Clone	h3b1	8.97	342.705	123.77	1351.992	14.497
Ctrl MO CO	Clone- Clone	h3b1	9.942	455.897	155.338	1384.382	16.078
Ctrl MO CO	Clone- Clone	h3b1	9.942	443.27	165.647	2502.633	16.078
Ctrl MO CO	Clone- Clone	h3b1	9.942	406.331	153.884	2296.268	16.078
Ctrl MO CO	Clone- Clone	h3b1	9.942	346.984	127.26	1298.992	16.078
Ctrl MO CO	Clone- Clone	h3b1	12.212	344.461	110.804	1583.253	19.768
Ctrl MO CO	Clone- Clone	h3b1	12.212	296.775	110.149	1243.203	19.768
Ctrl MO CO	Clone- Clone	h3b1	12.212	258.463	110.75	764.368	19.768
Ctrl MO CO	Clone- Clone	h3b1	12.212	227.577	111.533	817.513	19.768
Ctrl MO CO	Clone- Clone
Ctrl MO CO	Clone- Clone	h3b2	15.13	392.556	152.494	1997.552	24.512
Ctrl MO CO	Clone- Clone	h3b2	15.13	326.168	136.473	1540.407	24.512
Ctrl MO CO	Clone- Clone	h3b2	15.13	278.562	110.327	1076.729	24.512
Ctrl MO CO	Clone- Clone	h3b2	15.13	249.703	109.953	1843.955	24.512
Ctrl MO CO	Clone- Clone	h3b2	15.13	222.516	104.155	1406.991	24.512
Ctrl MO CO	Clone- Clone	h3b2	15.13	196.422	104.723	821.447	24.512
Ctrl MO CO	Clone- Clone	h3b2	15.13	179.199	99.093	638.806	24.512
Ctrl MO CO	Clone- Clone
Ctrl MO CO	Clone- Clone	h3b3	5.89	322.208	129.252	1043.809	9.489
Ctrl MO CO	Clone- Clone	h3b3	5.89	279.515	128.118	1316.568	9.489
Ctrl MO CO	Clone- Clone	h3b3	5.89	252.47	115.303	1157.655	9.489
Ctrl MO CO	Clone- Clone	h3b3	5.89	224.686	112.038	678.317	9.489
Ctrl MO CO	Clone- Clone
Ctrl MO CO	Clone- Clone	h3b4	6.754	291.747	125.253	958.953	10.894
Ctrl MO CO	Clone- Clone	h3b4	6.754	260.186	109.618	648.772	10.894
Ctrl MO CO	Clone- Clone	h3b4	6.754	245.536	100.781	931.557	10.894
Ctrl MO CO	Clone- Clone	h3b4	6.754	234.815	101.485	849.302	10.894
Ctrl MO CO	Clone- Clone	h3b4	6.754	221.574	99.87	1609.093	10.894
Ctrl MO CO	Clone- Clone	h3b4	6.754	205.272	100.153	1668.282	10.894
Ctrl MO CO	Clone- Clone	h4b1	12.698	364.671	119.925	1707.011	20.559
Ctrl MO CO	Clone- Clone	h4b1	12.698	424.426	133.201	2104.244	20.559
Ctrl MO CO	Clone- Clone	h4b1	12.698	438.661	123.628	2206.34	20.559
Ctrl MO CO	Clone- Clone	h4b1	12.698	405.288	129.639	1643.298	20.559
Ctrl MO CO	Clone- Clone	h4b1	12.698	337.643	114.355	2161.891	20.559
Ctrl MO CO	Clone- Clone	h4b1	12.698	254.069	114.14	1071.606	20.559
Ctrl MO CO	Clone- Clone	h4b1	12.698	207.593	111.569	812.532	20.559
Ctrl MO CO	Clone- Clone
Ctrl MO CO	Clone- Clone	h4b2	6.16	429.128	167.972	1839.618	9.928
Ctrl MO CO	Clone- Clone	h4b2	6.16	407.16	162.808	1824.642	9.928
Ctrl MO CO	Clone- Clone	h4b2	6.16	367.037	129.666	1255.401	9.928
Ctrl MO CO	Clone- Clone	h4b2	6.16	310.827	125.756	1183.912	9.928
Ctrl MO CO	Clone- Clone	h4b2	6.16	237.133	122.446	917.096	9.928
Ctrl MO CO	Clone- Clone	h4b2	6.16	194.335	119.579	539.784	9.928
Ctrl MO CO	Clone- Clone	h4b2	6.16	157.04	103.464	349.951	9.928
Ctrl MO CO	Clone- Clone	h4b2	6.16	136.232	102.699	221.703	9.928
Ctrl MO CO	Clone- Clone
Ctrl MO CO	Clone- Clone	h4b3	8.591	403.712	149.326	973.783	13.882
Ctrl MO CO	Clone- Clone	h4b3	8.591	366.256	143.972	825.81	13.882
Ctrl MO CO	Clone- Clone	h4b3	8.591	322.655	149.464	701.527	13.882
Ctrl MO CO	Clone- Clone	h4b3	8.591	268.706	133.537	711.144	13.882
Ctrl MO CO	Clone- Clone	h4b3	8.591	238.572	124.682	755.106	13.882
Ctrl MO CO	Clone- Clone	h4b3	8.591	206.217	113.417	510.056	13.882
Ctrl MO CO	Clone- Clone	h5b1	7.078	513.751	150.996	2936.968	11.422
Ctrl MO CO	Clone- Clone	h5b1	7.078	545.192	156.453	2658.151	11.422
Ctrl MO CO	Clone- Clone	h5b1	7.078	547.755	190.998	1728.178	11.422
Ctrl MO CO	Clone- Clone	h5b1	7.078	529.021	177.677	1029.673	11.422
Ctrl MO CO	Clone- Clone	h5b1	7.078	512.451	158.841	1130.917	11.422
Ctrl MO CO	Clone- Clone	h5b1	7.078	489.104	157.269	1769.725	11.422
Ctrl MO CO	Clone- Clone	h5b1	7.078	461.17	160.658	1566.813	11.422
Ctrl MO CO	Clone- Clone	h5b1	7.078	414.086	120.787	1773.66	11.422
Ctrl MO CO	Clone- Clone	h5b1	7.078	345.471	145.41	1872.198	11.422
Ctrl MO CO	Clone- Clone	h5b1	7.078	271.944	126.864	1216.07	11.422
Ctrl MO CO	Clone- Clone	h5b1	7.078	226.399	111.666	515.212	11.422
Ctrl MO CO	Clone- Clone	h5b1	7.078	199.797	109.065	387.419	11.422
Ctrl MO CO	Clone- Clone
Ctrl MO CO	Clone- Clone	h5b2	7.997	423.899	124.037	1338.086	12.908
Ctrl MO CO	Clone- Clone	h5b2	7.997	422.556	135.54	1635.852	12.908
Ctrl MO CO	Clone- Clone	h5b2	7.997	420.029	118.184	1389.793	12.908
Ctrl MO CO	Clone- Clone	h5b2	7.997	406.156	122.893	1231.409	12.908
Ctrl MO CO	Clone- Clone	h5b2	7.997	378.578	117.77	1992.032	12.908
Ctrl MO CO	Clone- Clone	h5b2	7.997	338.927	106.353	2154.644	12.908
Ctrl MO CO	Clone- Clone	h5b2	7.997	279.564	118.135	1302.742	12.908
Ctrl MO CO	Clone- Clone	h5b2	7.997	230.082	113.172	621.003	12.908
Ctrl MO CO	Clone- Clone	h5b2	7.997	185.603	109.044	351.645	12.908
Ctrl MO CO	Clone- Clone
Ctrl MO CO	Clone- Clone	h5b3	3.674	628.37	247.384	1650.178	5.887
Ctrl MO CO	Clone- Clone	h5b3	3.674	562.351	239.201	1408.321	5.887
Ctrl MO CO	Clone- Clone	h5b3	3.674	477.979	192.243	1388.907	5.887
Ctrl MO CO	Clone- Clone	h5b3	3.674	376.95	170.215	706.823	5.887
Ctrl MO CO	Clone- Clone	h5b3	3.674	273.514	131.334	574.286	5.887
Ctrl MO CO	Clone- Clone	h5b3	3.674	207.956	119.504	406.244	5.887
Ctrl MO CO	Clone- Clone
Ctrl MO CO	Clone- Clone	h5b4	13.4	470.521	147.408	1832.12	21.701
Ctrl MO CO	Clone- Clone	h5b4	13.4	479.886	160.897	2036.183	21.701
Ctrl MO CO	Clone- Clone	h5b4	13.4	466.926	159.53	2376.822	21.701
Ctrl MO CO	Clone- Clone	h5b4	13.4	441.779	125.344	1746.727	21.701
Ctrl MO CO	Clone- Clone	h5b4	13.4	401.011	151.309	1121.308	21.701
Ctrl MO CO	Clone- Clone	h5b4	13.4	338.189	116.498	1790.683	21.701
Ctrl MO CO	Clone- Clone	h5b4	13.4	272.97	116.21	1183.657	21.701
Ctrl MO CO	Clone- Clone	h5b4	13.4	227.513	98.739	643.124	21.701
Ctrl MO CO	Clone- Clone	h5b4	13.4	198.616	109.605	503.439	21.701
Ctrl MO CO	Clone- Clone
Ctrl MO CO	Clone- Clone	h5b5	5.133	448.805	132.203	2353.418	8.259
Ctrl MO CO	Clone- Clone	h5b5	5.133	488.26	145.96	3028.222	8.259
Ctrl MO CO	Clone- Clone	h5b5	5.133	500.633	196.217	2405.145	8.259
Ctrl MO CO	Clone- Clone	h5b5	5.133	450.164	172.144	1258.32	8.259
Ctrl MO CO	Clone- Clone	h5b5	5.133	385.453	180.378	772.002	8.259
Ctrl MO CO	Clone- Clone	h5b5	5.133	318.755	135.986	576.703	8.259
Ctrl MO CO	Clone- Clone	h5b5	5.133	252.999	155.01	428.353	8.259
Ctrl MO CO	Clone- Clone	h5b5	5.133	203.146	134.023	338	8.259
Ctrl MO CO	Clone- Clone
Ctrl MO CO	Clone- Clone	h5b6	7.781	444.804	140.109	1377.22	12.564
Ctrl MO CO	Clone- Clone	h5b6	7.781	410.436	125.104	1937.346	12.564
Ctrl MO CO	Clone- Clone	h5b6	7.781	361.6	134.258	1585.329	12.564
Ctrl MO CO	Clone- Clone	h5b6	7.781	302.651	130.647	955.202	12.564
Ctrl MO CO	Clone- Clone	h5b6	7.781	234.667	112.084	660.274	12.564
Ctrl MO CO	Clone- Clone	h5b6	7.781	179.68	94.052	404.984	12.564
Ctrl MO CO	Clone- Clone	h5b6	7.781	154.017	102.579	354.849	12.564
Ctrl MO CO	Clone- Clone
Ctrl MO CO	Clone- Clone	h5b7	9.402	477.089	165.635	1570.259	15.2
Ctrl MO CO	Clone- Clone	h5b7	9.402	497.368	144.46	1894.544	15.2
Ctrl MO CO	Clone- Clone	h5b7	9.402	487.024	151.159	1613.632	15.2
Ctrl MO CO	Clone- Clone	h5b7	9.402	464.976	144.553	1330.617	15.2
Ctrl MO CO	Clone- Clone	h5b7	9.402	433.997	146.9	1216.27	15.2
Ctrl MO CO	Clone- Clone	h5b7	9.402	406.649	132.093	1475.826	15.2
Ctrl MO CO	Clone- Clone	h5b7	9.402	360.109	127.074	1461.861	15.2
Ctrl MO CO	Clone- Clone	h5b7	9.402	312.892	126.341	919.168	15.2
Ctrl MO CO	Clone- Clone	h5b7	9.402	281.681	123.861	908.246	15.2
Ctrl MO CO	Clone- Clone	h5b7	9.402	237.778	110.584	900.536	15.2
Ctrl MO CO	Clone- Clone
Ctrl MO CO	Clone- Clone	h5b8	8.645	500.264	176.912	1871.964	13.97
Ctrl MO CO	Clone- Clone	h5b8	8.645	466.07	147.843	2471.811	13.97
Ctrl MO CO	Clone- Clone	h5b8	8.645	436.487	143.622	2293.792	13.97
Ctrl MO CO	Clone- Clone	h5b8	8.645	394.228	131.076	1450.192	13.97
Ctrl MO CO	Clone- Clone	h5b8	8.645	358.271	114.677	1512.891	13.97
Ctrl MO CO	Clone- Clone	h5b8	8.645	313.764	107.394	1732.726	13.97
Ctrl MO CO	Clone- Clone	h5b8	8.645	258.293	103.106	1502.508	13.97
Ctrl MO CO	Clone- Clone	h5b8	8.645	225.932	101.712	1204.054	13.97
Ctrl MO CO	Clone- Clone
Ctrl MO CO	Clone- Clone	h5b9	7.078	618.035	123.304	3429.212	11.422
Ctrl MO CO	Clone- Clone	h5b9	7.078	601.579	148.272	3175.917	11.422
Ctrl MO CO	Clone- Clone	h5b9	7.078	577.944	169.281	2538.973	11.422
Ctrl MO CO	Clone- Clone	h5b9	7.078	499.088	154.232	1584.381	11.422
Ctrl MO CO	Clone- Clone	h5b9	7.078	411.222	171.066	1343.525	11.422
Ctrl MO CO	Clone- Clone	h5b9	7.078	328.654	130.802	1123.874	11.422
Ctrl MO CO	Clone- Clone	h5b9	7.078	287.433	114.654	1090.253	11.422
Ctrl MO CO	Clone- Clone	h5b9	7.078	250.441	108.299	1403.145	11.422
Ctrl MO CO	Clone- Clone
Ctrl MO CO	Clone- Clone	h5b10	7.943	479.892	135.735	1802.404	12.827
Ctrl MO CO	Clone- Clone	h5b10	7.943	482.572	156.247	1258.661	12.827
Ctrl MO CO	Clone- Clone	h5b10	7.943	436.022	163.676	1559.249	12.827
Ctrl MO CO	Clone- Clone	h5b10	7.943	374.625	157.385	1182.975	12.827
Ctrl MO CO	Clone- Clone	h5b10	7.943	320.498	140.225	1053.778	12.827
Ctrl MO CO	Clone- Clone	h5b10	7.943	277.819	120.258	943.731	12.827
Ctrl MO CO	Clone- Clone	h5b10	7.943	248.09	118.528	759.883	12.827
Ctrl MO CO	Clone- Clone
Ctrl MO CO	Clone- Clone	h5b11	7.403	544.325	139.631	1985.525	11.949
Ctrl MO CO	Clone- Clone	h5b11	7.403	484.943	115.535	1641.497	11.949
Ctrl MO CO	Clone- Clone	h5b11	7.403	431.924	130.09	1095.58	11.949
Ctrl MO CO	Clone- Clone	h5b11	7.403	363.444	120.894	906.16	11.949
Ctrl MO CO	Clone- Clone	h5b11	7.403	318.35	129.986	766.982	11.949
Ctrl MO CO	Clone- Clone	h5b11	7.403	283.341	133.414	632.339	11.949
Ctrl MO CO	Clone- Clone	h5b11	7.403	260.791	115.052	691.877	11.949
Ctrl MO CO	Clone- Clone	h5b11	7.403	243.412	124.309	614.785	11.949
Ctrl MO PO	Non Clone- Clone	h1b1	12.86	552.456	123.247	1691.908	20.823
Ctrl MO PO	Non Clone- Clone	h1b1	12.86	536.836	142.559	1721.178	20.823
Ctrl MO PO	Non Clone- Clone	h1b1	12.86	478.954	158.53	1700.218	20.823
Ctrl MO PO	Non Clone- Clone	h1b1	12.86	393.703	153.052	1828.959	20.823
Ctrl MO PO	Non Clone- Clone	h1b1	12.86	308.66	133.007	1358.571	20.823
Ctrl MO PO	Non Clone- Clone	h1b1	12.86	279.847	130.351	924.44	20.823
Ctrl MO PO	Non Clone- Clone
Ctrl MO PO	Non Clone- Clone	h1b2	13.509	560.248	110.814	3420.965	21.877
Ctrl MO PO	Non Clone- Clone	h1b2	13.509	596.378	111.556	3173.124	21.877
Ctrl MO PO	Non Clone- Clone	h1b2	13.509	571.244	124.053	2295.369	21.877
Ctrl MO PO	Non Clone- Clone	h1b2	13.509	529.644	119.119	2117.507	21.877
Ctrl MO PO	Non Clone- Clone	h1b2	13.509	472.134	122.254	2029.711	21.877
Ctrl MO PO	Non Clone- Clone	h1b2	13.509	401.367	119.378	1454.821	21.877
Ctrl MO PO	Non Clone- Clone	h1b2	13.509	333.109	131.326	2212.216	21.877
Ctrl MO PO	Non Clone- Clone	h1b2	13.509	293.261	121.647	1837.323	21.877
Ctrl MO PO	Non Clone- Clone
Ctrl MO PO	Non Clone- Clone	h1b3	11.779	576.1	142.011	2201.042	19.065
Ctrl MO PO	Non Clone- Clone	h1b3	11.779	651.903	151.762	2517.879	19.065
Ctrl MO PO	Non Clone- Clone	h1b3	11.779	630.306	197.362	2788.239	19.065
Ctrl MO PO	Non Clone- Clone	h1b3	11.779	491.93	170.356	1355.936	19.065
Ctrl MO PO	Non Clone- Clone	h1b3	11.779	400.136	161.086	960.116	19.065
Ctrl MO PO	Non Clone- Clone	h1b3	11.779	352.305	155.105	915.738	19.065
Ctrl MO PO	Non Clone- Clone	h1b3	11.779	315.656	134.294	1141.174	19.065
Ctrl MO PO	Non Clone- Clone
Ctrl MO PO	Non Clone- Clone	h1b4	8.754	465.821	152.17	1495.967	14.145
Ctrl MO PO	Non Clone- Clone	h1b4	8.754	528.229	157.455	1439.96	14.145
Ctrl MO PO	Non Clone- Clone	h1b4	8.754	515.767	201.062	1463.411	14.145
Ctrl MO PO	Non Clone- Clone	h1b4	8.754	460.974	155.752	1152.081	14.145
Ctrl MO PO	Non Clone- Clone	h1b4	8.754	378.346	185.49	1004.778	14.145
Ctrl MO PO	Non Clone- Clone	h1b4	8.754	306.884	153.282	990.288	14.145
Ctrl MO PO	Non Clone- Clone	h2b1	6.7	510.44	158.261	4095	10.807
Ctrl MO PO	Non Clone- Clone	h2b1	6.7	527.237	144.334	4095	10.807
Ctrl MO PO	Non Clone- Clone	h2b1	6.7	509.091	134.572	3456.948	10.807
Ctrl MO PO	Non Clone- Clone	h2b1	6.7	440.926	145.31	1451.684	10.807
Ctrl MO PO	Non Clone- Clone
Ctrl MO PO	Non Clone- Clone	h2b2	7.727	553.879	167.007	2446.157	12.465
Ctrl MO PO	Non Clone- Clone	h2b2	7.727	584.508	161.038	2292.112	12.465
Ctrl MO PO	Non Clone- Clone	h2b2	7.727	570.097	179.681	1584.44	12.465
Ctrl MO PO	Non Clone- Clone	h2b2	7.727	507.698	174.592	1288.778	12.465
Ctrl MO PO	Non Clone- Clone	h2b2	7.727	455.807	168.683	1425.873	12.465
Ctrl MO PO	Non Clone- Clone	h2b2	7.727	382.991	158.127	2016.481	12.465
Ctrl MO PO	Non Clone- Clone
Ctrl MO PO	Non Clone- Clone	h2b3	6.97	620.043	147.853	3808.083	11.246
Ctrl MO PO	Non Clone- Clone	h2b3	6.97	559.41	154.682	2996.318	11.246
Ctrl MO PO	Non Clone- Clone	h2b3	6.97	466.383	165.758	1546.676	11.246
Ctrl MO PO	Non Clone- Clone	h2b3	6.97	404.395	154.698	1150.268	11.246
Ctrl MO PO	Non Clone- Clone	h2b3	6.97	349.307	151.871	1158.88	11.246
Ctrl MO PO	Non Clone- Clone	h2b3	6.97	292.87	127.259	720.312	11.246
Ctrl MO PO	Non Clone- Clone	h2b3	6.97	228.32	130.391	722.282	11.246
Ctrl MO PO	Non Clone- Clone
Ctrl MO PO	Non Clone- Clone	h2b4	8.483	606.729	172.566	2021.353	13.706
Ctrl MO PO	Non Clone- Clone	h2b4	8.483	520.657	181.517	1223.761	13.706
Ctrl MO PO	Non Clone- Clone	h2b4	8.483	455.495	192.532	1037.657	13.706
Ctrl MO PO	Non Clone- Clone	h2b4	8.483	380.764	199.624	1120.188	13.706
Ctrl MO PO	Non Clone- Clone	h2b4	8.483	326.38	154.405	834.848	13.706
Ctrl MO PO	Non Clone- Clone	h2b4	8.483	279.666	131.273	1190.505	13.706
Ctrl MO PO	Non Clone- Clone
Ctrl MO PO	Non Clone- Clone	h2b5	5.403	471.4	160.029	3344.132	8.698
Ctrl MO PO	Non Clone- Clone	h2b5	5.403	446.47	159.198	3503.235	8.698
Ctrl MO PO	Non Clone- Clone	h2b5	5.403	402.112	149.748	2877.421	8.698
Ctrl MO PO	Non Clone- Clone	h2b5	5.403	350.566	166.719	1394.871	8.698
Ctrl MO PO	Non Clone- Clone	h2b5	5.403	301.422	144.96	1010.243	8.698
Ctrl MO PO	Non Clone- Clone	h2b5	5.403	242.418	126.106	575.782	8.698
Ctrl MO PO	Non Clone- Clone	h3b1	7.889	293.19	119.514	753.354	12.738
Ctrl MO PO	Non Clone- Clone	h3b1	7.889	244.591	117.697	1021.324	12.738
Ctrl MO PO	Non Clone- Clone	h3b1	7.889	205.322	104.721	785.985	12.738
Ctrl MO PO	Non Clone- Clone	h3b1	7.889	177.588	110.031	434.79	12.738
Ctrl MO PO	Non Clone- Clone	h3b1	7.889	167.89	104.845	405.799	12.738
Ctrl MO PO	Non Clone- Clone
Ctrl MO PO	Non Clone- Clone	h3b2	10.104	660.343	177.88	2024.857	16.342
Ctrl MO PO	Non Clone- Clone	h3b2	10.104	610.956	214.953	1860.509	16.342
Ctrl MO PO	Non Clone- Clone	h3b2	10.104	505.969	179.584	1381.153	16.342
Ctrl MO PO	Non Clone- Clone	h3b2	10.104	365.042	157.48	1640.795	16.342
Ctrl MO PO	Non Clone- Clone	h3b2	10.104	269.397	119.116	1144.999	16.342
Ctrl MO PO	Non Clone- Clone	h3b2	10.104	216.556	106.536	625.313	16.342
Ctrl MO PO	Non Clone- Clone	h4b1	5.836	408.561	143.294	1460.63	9.401
Ctrl MO PO	Non Clone- Clone	h4b1	5.836	385.638	130.375	1306.609	9.401
Ctrl MO PO	Non Clone- Clone	h4b1	5.836	355.623	134.53	1141.134	9.401
Ctrl MO PO	Non Clone- Clone	h4b1	5.836	324.815	131.809	838.672	9.401
Ctrl MO PO	Non Clone- Clone	h4b1	5.836	279.504	114.457	803.205	9.401
Ctrl MO PO	Non Clone- Clone	h4b1	5.836	251.459	122.514	721.728	9.401
Ctrl MO PO	Non Clone- Clone	h4b1	5.836	230.996	119.358	663.145	9.401
Ctrl MO PO	Non Clone- Clone	h5b1	11.023	351.901	138.872	1230.971	17.835
Ctrl MO PO	Non Clone- Clone	h5b1	11.023	325.004	138.478	1394.312	17.835
Ctrl MO PO	Non Clone- Clone	h5b1	11.023	305.274	109.58	1757.5	17.835
Ctrl MO PO	Non Clone- Clone	h5b1	11.023	290.11	113.161	1582.59	17.835
Ctrl MO PO	Non Clone- Clone	h5b1	11.023	276.084	109.774	984.55	17.835
Ctrl MO PO	Non Clone- Clone	h5b1	11.023	254.481	107.662	875.436	17.835
Ctrl MO PO	Non Clone- Clone	h5b1	11.023	235.43	111.263	1009.25	17.835
Ctrl MO PO	Non Clone- Clone	h5b1	11.023	218.177	106.433	1682.699	17.835
Ctrl MO PO	Non Clone- Clone
Ctrl MO PO	Non Clone- Clone	h5b2	5.998	488.409	195.645	1428.006	9.664
Ctrl MO PO	Non Clone- Clone	h5b2	5.998	497.443	184.296	1818.689	9.664
Ctrl MO PO	Non Clone- Clone	h5b2	5.998	483.588	170.953	1831.678	9.664
Ctrl MO PO	Non Clone- Clone	h5b2	5.998	436.146	187.236	1197.693	9.664
Ctrl MO PO	Non Clone- Clone	h5b2	5.998	378.999	179.426	960.348	9.664
Ctrl MO PO	Non Clone- Clone	h5b2	5.998	320.914	157.057	799.005	9.664
Ctrl MO PO	Non Clone- Clone	h5b2	5.998	250.76	146.608	534.453	9.664
Ctrl MO PO	Non Clone- Clone	h5b2	5.998	215.708	129.256	439.697	9.664
Ctrl MO PO	Non Clone- Clone	h5b2	5.998	191.501	119.531	363.125	9.664
Ctrl MO PO	Non Clone- Clone	h5b2	5.998	170.739	108.641	311.853	9.664
Ctrl MO PO	Non Clone- Clone
Ctrl MO PO	Non Clone- Clone	h5b3	7.835	393.097	115.565	936.904	12.652
Ctrl MO PO	Non Clone- Clone	h5b3	7.835	420.01	148.175	1071.59	12.652
Ctrl MO PO	Non Clone- Clone	h5b3	7.835	460.507	149.588	1271.075	12.652
Ctrl MO PO	Non Clone- Clone	h5b3	7.835	499.208	143.378	1355.234	12.652
Ctrl MO PO	Non Clone- Clone	h5b3	7.835	510.534	153.273	1305.852	12.652
Ctrl MO PO	Non Clone- Clone	h5b3	7.835	511.825	135.423	1326.558	12.652
Ctrl MO PO	Non Clone- Clone	h5b3	7.835	475.778	112.133	1617.009	12.652
Ctrl MO PO	Non Clone- Clone	h5b3	7.835	383.706	126.713	1351.568	12.652
Ctrl MO PO	Non Clone- Clone	h5b3	7.835	285.125	118.846	883.064	12.652
Ctrl MO PO	Non Clone- Clone	h5b3	7.835	229.608	104.667	693.694	12.652
Ctrl MO PO	Non Clone- Clone	h5b3	7.835	186.362	111.064	407.832	12.652
Ctrl MO PO	Non Clone- Clone
Ctrl MO PO	Non Clone- Clone	h5b4	12.968	371.441	115.993	1557.691	20.998
Ctrl MO PO	Non Clone- Clone	h5b4	12.968	371.06	115.866	1280.639	20.998
Ctrl MO PO	Non Clone- Clone	h5b4	12.968	353.847	129.212	1054.945	20.998
Ctrl MO PO	Non Clone- Clone	h5b4	12.968	311.635	123.989	1014.486	20.998
Ctrl MO PO	Non Clone- Clone	h5b4	13.4	314.682	118.642	2529.098	21.701
Ctrl MO PO	Non Clone- Clone	h5b4	13.4	289.368	115.755	2513.179	21.701
Ctrl MO PO	Non Clone- Clone	h5b4	13.4	247.921	111.868	1317.155	21.701
Ctrl MO PO	Non Clone- Clone	h5b4	13.4	200.522	101.976	767.01	21.701
Ctrl MO PO	Non Clone- Clone	h5b4	13.4	175.993	101.226	474.041	21.701
Ctrl MO PO	Non Clone- Clone	h5b4	13.4	162.433	101.257	447.941	21.701
Ctrl MO PO	Non Clone- Clone	h5b4	13.4	153.617	95.881	416.749	21.701
Ctrl MO NO	Non Clone- Non Clone	h1b1	7.241	820.808	171.401	3375.794	11.685
Ctrl MO NO	Non Clone- Non Clone	h1b1	7.241	790.947	193.975	3191.083	11.685
Ctrl MO NO	Non Clone- Non Clone	h1b1	7.241	643.825	161.679	2085.459	11.685
Ctrl MO NO	Non Clone- Non Clone	h1b1	7.241	433.53	135.08	1265.415	11.685
Ctrl MO NO	Non Clone- Non Clone	h1b1	7.241	257.154	132.991	547.498	11.685
Ctrl MO NO	Non Clone- Non Clone	h1b1	7.241	200.4	121.399	369.125	11.685
Ctrl MO NO	Non Clone- Non Clone
Ctrl MO NO	Non Clone- Non Clone	h1b2	8.267	804.984	289.131	3735.8	13.354
Ctrl MO NO	Non Clone- Non Clone	h1b2	8.267	793.549	311.994	4020.688	13.354
Ctrl MO NO	Non Clone- Non Clone	h1b2	8.267	680.519	253.201	2952.494	13.354
Ctrl MO NO	Non Clone- Non Clone	h1b2	8.267	514.541	213.367	1216.308	13.354
Ctrl MO NO	Non Clone- Non Clone	h1b2	8.267	367.476	169.47	770.13	13.354
Ctrl MO NO	Non Clone- Non Clone	h1b2	8.267	255.563	123.18	795.81	13.354
Ctrl MO NO	Non Clone- Non Clone	h1b2	8.267	207.847	114.606	585.465	13.354
Ctrl MO NO	Non Clone- Non Clone
Ctrl MO NO	Non Clone- Non Clone	h1b3	10.158	459.797	136.512	2596.662	16.43
Ctrl MO NO	Non Clone- Non Clone	h1b3	10.158	448.567	151.038	1995.226	16.43
Ctrl MO NO	Non Clone- Non Clone	h1b3	10.158	421.345	135.782	1657.3	16.43
Ctrl MO NO	Non Clone- Non Clone	h1b3	10.158	365.671	124.543	1409.747	16.43
Ctrl MO NO	Non Clone- Non Clone	h1b3	10.158	306.228	125.466	811.092	16.43
Ctrl MO NO	Non Clone- Non Clone	h1b3	10.158	272.017	137.543	565.078	16.43
Ctrl MO NO	Non Clone- Non Clone	h1b3	10.158	240.367	138.271	738.36	16.43
Ctrl MO NO	Non Clone- Non Clone	h1b3	10.158	210.338	119.594	754.045	16.43
Ctrl MO NO	Non Clone- Non Clone
Ctrl MO NO	Non Clone- Non Clone	h1b4	10.915	444.451	113.525	1758.3	17.66
Ctrl MO NO	Non Clone- Non Clone	h1b4	10.915	463.367	127.849	1516.921	17.66
Ctrl MO NO	Non Clone- Non Clone	h1b4	10.915	461.246	127.125	1623.059	17.66
Ctrl MO NO	Non Clone- Non Clone	h1b4	10.915	420.251	128.806	2134.479	17.66
Ctrl MO NO	Non Clone- Non Clone	h1b4	10.915	377.874	110.942	2076.978	17.66
Ctrl MO NO	Non Clone- Non Clone	h1b4	10.915	324.188	137.365	1313.371	17.66
Ctrl MO NO	Non Clone- Non Clone
Ctrl MO NO	Non Clone- Non Clone	h1b5	8.916	590.363	145.345	2068.473	14.409
Ctrl MO NO	Non Clone- Non Clone	h1b5	8.916	466.463	155.208	1354.751	14.409
Ctrl MO NO	Non Clone- Non Clone	h1b5	8.916	350.417	132.748	1329.919	14.409
Ctrl MO NO	Non Clone- Non Clone	h1b5	8.916	247.6	113.775	638.577	14.409
Ctrl MO NO	Non Clone- Non Clone	h1b5	8.916	206.981	110.336	526.549	14.409
Ctrl MO NO	Non Clone- Non Clone	h1b5	8.916	183.176	108.109	446.908	14.409
Ctrl MO NO	Non Clone- Non Clone	h1b5	8.916	158.226	102.314	371.227	14.409
Ctrl MO NO	Non Clone- Non Clone	h2b1	7.187	752.151	199.035	3455.286	11.586
Ctrl MO NO	Non Clone- Non Clone	h2b1	7.187	685.656	206.062	2378.917	11.586
Ctrl MO NO	Non Clone- Non Clone	h2b1	7.187	576.686	234.821	1757.061	11.586
Ctrl MO NO	Non Clone- Non Clone	h2b1	7.187	477.271	196.96	1530.366	11.586
Ctrl MO NO	Non Clone- Non Clone	h2b1	7.187	376.122	174.087	1470.426	11.586
Ctrl MO NO	Non Clone- Non Clone	h2b1	7.187	326.41	139.423	1344.173	11.586
Ctrl MO NO	Non Clone- Non Clone	h2b1	7.187	289.236	123.276	1017.309	11.586
Ctrl MO NO	Non Clone- Non Clone
Ctrl MO NO	Non Clone- Non Clone	h2b2	9.456	734.015	186.643	4095	15.287
Ctrl MO NO	Non Clone- Non Clone	h2b2	9.456	641.672	173.149	4017.052	15.287
Ctrl MO NO	Non Clone- Non Clone	h2b2	9.456	509.825	157.702	2162.901	15.287
Ctrl MO NO	Non Clone- Non Clone	h2b2	9.456	386.008	160.037	1246.012	15.287
Ctrl MO NO	Non Clone- Non Clone	h2b2	9.456	281.087	120.65	1161.889	15.287
Ctrl MO NO	Non Clone- Non Clone	h2b2	9.456	219.942	115.92	825.854	15.287
Ctrl MO NO	Non Clone- Non Clone
Ctrl MO NO	Non Clone- Non Clone	h2b3	8.97	541.53	135.961	2843.013	14.497
Ctrl MO NO	Non Clone- Non Clone	h2b3	8.97	560.038	145.111	2945.336	14.497
Ctrl MO NO	Non Clone- Non Clone	h2b3	8.97	523.346	152.893	1843.322	14.497
Ctrl MO NO	Non Clone- Non Clone	h2b3	8.97	471.447	146.578	1312.041	14.497
Ctrl MO NO	Non Clone- Non Clone	h2b3	8.97	400.707	147.775	917.163	14.497
Ctrl MO NO	Non Clone- Non Clone	h2b3	8.916	491.177	166.024	2040.918	14.409
Ctrl MO NO	Non Clone- Non Clone	h2b3	8.916	394.878	144.368	1132.459	14.409
Ctrl MO NO	Non Clone- Non Clone	h2b3	8.916	305.265	127.82	1369.89	14.409
Ctrl MO NO	Non Clone- Non Clone	h2b3	8.916	261.073	141.438	2304.981	14.409
Ctrl MO NO	Non Clone- Non Clone
Ctrl MO NO	Non Clone- Non Clone	h2b4	9.132	672.622	160.513	2652.778	14.76
Ctrl MO NO	Non Clone- Non Clone	h2b4	9.132	623.606	163.678	2231.111	14.76
Ctrl MO NO	Non Clone- Non Clone	h2b4	9.132	553.404	187.101	2463.856	14.76
Ctrl MO NO	Non Clone- Non Clone	h2b4	9.132	467.399	208.598	1861.942	14.76
Ctrl MO NO	Non Clone- Non Clone	h2b4	9.132	362.224	181.048	921.462	14.76
Ctrl MO NO	Non Clone- Non Clone	h2b4	9.132	305.654	155.652	971.025	14.76
Ctrl MO NO	Non Clone- Non Clone
Ctrl MO NO	Non Clone- Non Clone	h2b5	9.618	562.96	155.543	2231.941	15.551
Ctrl MO NO	Non Clone- Non Clone	h2b5	9.618	495.68	175.664	1711.377	15.551
Ctrl MO NO	Non Clone- Non Clone	h2b5	9.618	408.908	146.099	1191.4	15.551
Ctrl MO NO	Non Clone- Non Clone	h2b5	9.618	306.052	133.72	751.587	15.551
Ctrl MO NO	Non Clone- Non Clone	h2b5	9.618	237.44	114.354	568.14	15.551
Ctrl MO NO	Non Clone- Non Clone	h2b5	9.618	205.259	117.578	513.448	15.551
Ctrl MO NO	Non Clone- Non Clone
Ctrl MO NO	Non Clone- Non Clone	h2b6	10.158	553.567	150.265	4095	16.389
Ctrl MO NO	Non Clone- Non Clone	h2b6	10.158	567.833	147.995	4095	16.389
Ctrl MO NO	Non Clone- Non Clone	h2b6	10.158	543.395	154.933	4095	16.389
Ctrl MO NO	Non Clone- Non Clone	h2b6	10.158	477.351	164.483	2834.109	16.389
Ctrl MO NO	Non Clone- Non Clone	h2b6	10.158	373.136	146.228	1170.889	16.389
Ctrl MO NO	Non Clone- Non Clone	h2b6	10.158	297.757	129.668	819.881	16.389
Ctrl MO NO	Non Clone- Non Clone	h2b6	10.158	258.607	125.611	702.138	16.389
Ctrl MO NO	Non Clone- Non Clone	h3b1	10.645	471.64	129.378	1789.482	17.22
Ctrl MO NO	Non Clone- Non Clone	h3b1	10.645	457.615	136.208	1734.408	17.22
Ctrl MO NO	Non Clone- Non Clone	h3b1	10.645	429.902	143.788	1544.178	17.22
Ctrl MO NO	Non Clone- Non Clone	h3b1	10.645	390.64	151.406	1427.126	17.22
Ctrl MO NO	Non Clone- Non Clone	h3b1	10.645	307	134.079	1220.19	17.22
Ctrl MO NO	Non Clone- Non Clone	h3b1	10.645	227.995	123.631	1039.106	17.22
Ctrl MO NO	Non Clone- Non Clone
Ctrl MO NO	Non Clone- Non Clone	h3b2	11.401	371.165	108.893	1283.004	18.45
Ctrl MO NO	Non Clone- Non Clone	h3b2	11.401	378.808	116.803	1349.341	18.45
Ctrl MO NO	Non Clone- Non Clone	h3b2	11.401	313.713	120.628	1269.697	18.45
Ctrl MO NO	Non Clone- Non Clone	h3b2	11.401	242.924	121.912	831.857	18.45
Ctrl MO NO	Non Clone- Non Clone	h3b2	11.401	188.115	108.041	345.067	18.45
Ctrl MO NO	Non Clone- Non Clone	h3b2	11.401	158.774	107.712	296.226	18.45
Ctrl MO NO	Non Clone- Non Clone
Ctrl MO NO	Non Clone- Non Clone	h3b3	6.646	480.074	142.088	1165.232	10.719
Ctrl MO NO	Non Clone- Non Clone	h3b3	6.646	409.918	117.465	1153.721	10.719
Ctrl MO NO	Non Clone- Non Clone	h3b3	6.646	329.024	138.812	821.053	10.719
Ctrl MO NO	Non Clone- Non Clone	h3b3	6.646	247.658	116.642	829	10.719
Ctrl MO NO	Non Clone- Non Clone	h4b1	9.078	455.464	143.72	2539.129	14.672
Ctrl MO NO	Non Clone- Non Clone	h4b1	9.078	385.972	118.276	1449.161	14.672
Ctrl MO NO	Non Clone- Non Clone	h4b1	9.078	307.743	136.866	908.464	14.672
Ctrl MO NO	Non Clone- Non Clone	h4b1	9.078	266.385	120.017	687.736	14.672
Ctrl MO NO	Non Clone- Non Clone	h4b1	9.078	234.855	122.494	515.639	14.672
Ctrl MO NO	Non Clone- Non Clone	h4b1	9.078	201.082	110.247	399.443	14.672
Ctrl MO NO	Non Clone- Non Clone
Ctrl MO NO	Non Clone- Non Clone	h4b2	6.214	363.771	136.049	1074.076	10.006
Ctrl MO NO	Non Clone- Non Clone	h4b2	6.214	297.007	120.981	995.848	10.006
Ctrl MO NO	Non Clone- Non Clone	h4b2	6.214	251.112	117.69	865.76	10.006
Ctrl MO NO	Non Clone- Non Clone	h4b2	6.214	229.677	115.48	809.454	10.006
Ctrl MO NO	Non Clone- Non Clone	h4b2	6.214	211.616	114.446	545.581	10.006
Ctrl MO NO	Non Clone- Non Clone	h4b2	6.214	194.116	110.985	474.81	10.006
Ctrl MO NO	Non Clone- Non Clone
Ctrl MO NO	Non Clone- Non Clone	h4b3	9.51	449.525	147.173	1169.643	15.375
Ctrl MO NO	Non Clone- Non Clone	h4b3	9.51	412.216	152.109	1317.846	15.375
Ctrl MO NO	Non Clone- Non Clone	h4b3	9.51	332.898	124.908	929.844	15.375
Ctrl MO NO	Non Clone- Non Clone	h4b3	9.51	271.959	128.562	703.822	15.375
Ctrl MO NO	Non Clone- Non Clone	h4b3	9.51	211.857	119.659	416.995	15.375
Ctrl MO NO	Non Clone- Non Clone	h4b3	9.51	169.495	105.032	399.518	15.375
Ctrl MO NO	Non Clone- Non Clone	h4b3	9.51	143.107	99.7	280.777	15.375
Ctrl MO NO	Non Clone- Non Clone
Ctrl MO NO	Non Clone- Non Clone	h4b4	10.158	365.185	145.725	1102.658	16.43
Ctrl MO NO	Non Clone- Non Clone	h4b4	10.158	342.205	129.885	1353.953	16.43
Ctrl MO NO	Non Clone- Non Clone	h4b4	10.158	276.648	119.375	997.652	16.43
Ctrl MO NO	Non Clone- Non Clone	h4b4	10.158	202.664	107.357	633.846	16.43
Ctrl MO NO	Non Clone- Non Clone	h4b4	10.158	170.231	98.781	351.938	16.43
Ctrl MO NO	Non Clone- Non Clone	h5b1	10.158	530.287	180.898	2059.45	16.43
Ctrl MO NO	Non Clone- Non Clone	h5b1	10.158	500.1	152.085	2066.656	16.43
Ctrl MO NO	Non Clone- Non Clone	h5b1	10.158	450.277	152.624	1754.794	16.43
Ctrl MO NO	Non Clone- Non Clone	h5b1	10.158	403.175	137.03	1428.671	16.43
Ctrl MO NO	Non Clone- Non Clone	h5b1	10.158	327.941	137.053	1025.07	16.43
Ctrl MO NO	Non Clone- Non Clone	h5b1	10.158	258.021	137.859	421.397	16.43
Ctrl MO NO	Non Clone- Non Clone	h5b1	10.158	207.186	120.698	366.958	16.43
Ctrl MO NO	Non Clone- Non Clone	h5b1	10.158	168.795	109.298	297.478	16.43
Ctrl MO NO	Non Clone- Non Clone
Ctrl MO NO	Non Clone- Non Clone	h5b2	10.645	559.532	154.8	2507.568	17.217
Ctrl MO NO	Non Clone- Non Clone	h5b2	10.645	523.295	170.495	2291.782	17.217
Ctrl MO NO	Non Clone- Non Clone	h5b2	10.645	481.247	145.922	1604.37	17.217
Ctrl MO NO	Non Clone- Non Clone	h5b2	10.645	415.436	155.461	1588.649	17.217
Ctrl MO NO	Non Clone- Non Clone	h5b2	10.645	359.697	123.825	1399.161	17.217
Ctrl MO NO	Non Clone- Non Clone	h5b2	10.645	309.601	110.893	1092.556	17.217
Ctrl MO NO	Non Clone- Non Clone	h5b2	10.645	263.075	104.195	842.705	17.217
Ctrl MO NO	Non Clone- Non Clone	h5b2	10.645	199.984	105.034	484.701	17.217
Ctrl MO NO	Non Clone- Non Clone
Ctrl MO NO	Non Clone- Non Clone	h5b3	7.349	566.716	140.57	1827.625	11.861
Ctrl MO NO	Non Clone- Non Clone	h5b3	7.349	542.147	136.042	2084.098	11.861
Ctrl MO NO	Non Clone- Non Clone	h5b3	7.349	500.644	136.797	1850.213	11.861
Ctrl MO NO	Non Clone- Non Clone	h5b3	7.349	437.07	131.677	1312.347	11.861
Ctrl MO NO	Non Clone- Non Clone	h5b3	7.349	347.689	120.405	1125.27	11.861
Ctrl MO NO	Non Clone- Non Clone	h5b3	7.349	277.795	135.472	981.654	11.861
Ctrl MO NO	Non Clone- Non Clone	h5b3	7.349	220.103	122.831	483.377	11.861
Ctrl MO NO	Non Clone- Non Clone	h5b3	7.349	177.905	109.766	350.4	11.861
Ctrl MO NO	Non Clone- Non Clone	h5b3	7.349	154.124	104.638	281.449	11.861
Ctrl MO NO	Non Clone- Non Clone
Ctrl MO NO	Non Clone- Non Clone	h5b4	8.429	528.602	179.384	1669.178	13.618
Ctrl MO NO	Non Clone- Non Clone	h5b4	8.429	464.099	140.491	1758.942	13.618
Ctrl MO NO	Non Clone- Non Clone	h5b4	8.429	401.966	122.522	1423.305	13.618
Ctrl MO NO	Non Clone- Non Clone	h5b4	8.429	350.376	122.875	1135.366	13.618
Ctrl MO NO	Non Clone- Non Clone	h5b4	8.429	291.05	118.889	885.639	13.618
Ctrl MO NO	Non Clone- Non Clone	h5b4	8.429	230.247	111.664	533.636	13.618
Ctrl MO NO	Non Clone- Non Clone	h5b4	8.429	191.413	106.235	419.239	13.618
Ctrl MO NO	Non Clone- Non Clone
Ctrl MO NO	Non Clone- Non Clone	h5b5	6.484	464.808	140.742	1077.052	10.455
Ctrl MO NO	Non Clone- Non Clone	h5b5	6.484	421.736	132.641	938.954	10.455
Ctrl MO NO	Non Clone- Non Clone	h5b5	6.484	364.919	140.163	800.668	10.455
Ctrl MO NO	Non Clone- Non Clone	h5b5	6.484	317.319	136.51	749.935	10.455
Ctrl MO NO	Non Clone- Non Clone	h5b5	6.484	271.041	142.963	1262.498	10.455
Ctrl MO NO	Non Clone- Non Clone	h5b5	6.484	242.852	127.481	2125.947	10.455
Ctrl MO NO	Non Clone- Non Clone	h5b5	6.484	220.051	114.876	1938.513	10.455
Ctrl MO NO	Non Clone- Non Clone	h5b5	6.484	194.798	112.566	897.103	10.455
Ecad MO CO	Clone- Clone	h1b1	7.781	533.139	179.644	1972.784	12.564
Ecad MO CO	Clone- Clone	h1b1	7.781	461.566	162.422	1188.174	12.564
Ecad MO CO	Clone- Clone	h1b1	7.781	367.006	157.35	968.896	12.564
Ecad MO CO	Clone- Clone	h1b1	7.781	299.263	137.578	892.677	12.564
Ecad MO CO	Clone- Clone	h1b1	7.781	249.994	113.572	811.759	12.564
Ecad MO CO	Clone- Clone	h1b1	7.781	217.102	110.331	662.853	12.564
Ecad MO CO	Clone- Clone
Ecad MO CO	Clone- Clone	h1b2	6.7	437.178	149.349	1179.505	10.807
Ecad MO CO	Clone- Clone	h1b2	6.7	347.127	136.602	1006.823	10.807
Ecad MO CO	Clone- Clone	h1b2	6.7	294.917	123.299	1004.654	10.807
Ecad MO CO	Clone- Clone	h1b2	6.7	263.341	115.99	1139.045	10.807
Ecad MO CO	Clone- Clone	h1b2	6.7	238.742	103.317	1369.554	10.807
Ecad MO CO	Clone- Clone
Ecad MO CO	Clone- Clone	h1b3	4.539	438.797	201.522	1521.592	7.292
Ecad MO CO	Clone- Clone	h1b3	4.539	362.189	135.694	1062.471	7.292
Ecad MO CO	Clone- Clone	h1b3	4.539	273.586	124.549	612.562	7.292
Ecad MO CO	Clone- Clone	h1b3	4.539	219.717	121.351	421.895	7.292
Ecad MO CO	Clone- Clone	h1b3	4.539	184.037	106.617	322.987	7.292
Ecad MO CO	Clone- Clone	h1b3	4.539	162.687	108.31	286.554	7.292
Ecad MO CO	Clone- Clone
Ecad MO CO	Clone- Clone	h1b4	6.592	383.004	149.898	1226.302	10.631
Ecad MO CO	Clone- Clone	h1b4	6.592	328.584	126.202	1038.569	10.631
Ecad MO CO	Clone- Clone	h1b4	6.592	297.277	114.092	1243.453	10.631
Ecad MO CO	Clone- Clone	h1b4	6.592	247.633	114.115	1282.425	10.631
Ecad MO CO	Clone- Clone	h1b4	6.592	213.956	106.63	1086.418	10.631
Ecad MO CO	Clone- Clone	h1b4	6.592	197.854	100.991	930.834	10.631
Ecad MO CO	Clone- Clone	h1b4	6.592	186.898	100.283	649.99	10.631
Ecad MO CO	Clone- Clone
Ecad MO CO	Clone- Clone	h1b5	4.269	572.3	225.571	1279.67	6.853
Ecad MO CO	Clone- Clone	h1b5	4.269	422.864	200.822	767.084	6.853
Ecad MO CO	Clone- Clone	h1b5	4.269	318.151	164.66	555.056	6.853
Ecad MO CO	Clone- Clone	h1b5	4.269	247.667	132.761	414.527	6.853
Ecad MO CO	Clone- Clone	h1b5	4.269	204.47	129.539	343.897	6.853
Ecad MO CO	Clone- Clone	h1b5	4.269	184.898	122.234	289.725	6.853
Ecad MO CO	Clone- Clone
Ecad MO CO	Clone- Clone	h1b6	6.214	481.923	191.463	1316.508	10.016
Ecad MO CO	Clone- Clone	h1b6	6.214	426.737	179.448	942.936	10.016
Ecad MO CO	Clone- Clone	h1b6	6.214	350.641	163.073	953.338	10.016
Ecad MO CO	Clone- Clone	h1b6	6.214	289.42	136.331	775.99	10.016
Ecad MO CO	Clone- Clone	h1b6	6.214	237.826	127.107	537.008	10.016
Ecad MO CO	Clone- Clone	h1b6	6.214	201.508	115.375	395.965	10.016
Ecad MO CO	Clone- Clone
Ecad MO CO	Clone- Clone	h1b7	9.78	577.646	147.958	1400.561	15.815
Ecad MO CO	Clone- Clone	h1b7	9.78	461.195	152.424	1003.163	15.815
Ecad MO CO	Clone- Clone	h1b7	9.78	345.264	155.707	739.53	15.815
Ecad MO CO	Clone- Clone	h1b7	9.78	259.381	140.164	454.951	15.815
Ecad MO CO	Clone- Clone	h1b7	9.78	207.991	132.264	348.238	15.815
Ecad MO CO	Clone- Clone	h1b7	9.78	169.722	110.185	289.865	15.815
Ecad MO CO	Clone- Clone
Ecad MO CO	Clone- Clone	h1b8	7.673	507.994	174.297	1183.24	12.388
Ecad MO CO	Clone- Clone	h1b8	7.673	356.526	181.175	1075.647	12.388
Ecad MO CO	Clone- Clone	h1b8	7.673	263.737	138.815	765.368	12.388
Ecad MO CO	Clone- Clone	h1b8	7.673	218.248	122.267	1300.368	12.388
Ecad MO CO	Clone- Clone	h1b8	7.673	191.897	123.254	1517.87	12.388
Ecad MO CO	Clone- Clone	h1b8	7.673	164.933	107.39	1007.219	12.388
Ecad MO CO	Clone- Clone
Ecad MO CO	Clone- Clone	h1b9	9.564	635.064	175.727	1529.813	15.463
Ecad MO CO	Clone- Clone	h1b9	9.564	410.486	161.969	833.396	15.463
Ecad MO CO	Clone- Clone	h1b9	9.564	307.264	120.411	576.045	15.463
Ecad MO CO	Clone- Clone	h1b9	9.564	257.748	143.892	463.181	15.463
Ecad MO CO	Clone- Clone	h1b9	9.564	200.369	126.928	346.006	15.463
Ecad MO CO	Clone- Clone	h1b9	9.564	167.994	107.842	351.224	15.463
Ecad MO CO	Clone- Clone
Ecad MO CO	Clone- Clone	h1b10	8.916	479.762	141.051	1474.343	14.409
Ecad MO CO	Clone- Clone	h1b10	8.916	379.574	152.639	1178.624	14.409
Ecad MO CO	Clone- Clone	h1b10	8.916	298.407	137.401	790.47	14.409
Ecad MO CO	Clone- Clone	h1b10	8.916	239.723	113.926	566.867	14.409
Ecad MO CO	Clone- Clone	h1b10	8.916	205.84	112.374	469.551	14.409
Ecad MO CO	Clone- Clone	h1b10	8.916	190.093	105.844	460.884	14.409
Ecad MO CO	Clone- Clone
Ecad MO CO	Clone- Clone	h1b11	7.024	545.466	154.643	1448.464	11.334
Ecad MO CO	Clone- Clone	h1b11	7.024	401.12	153.521	1063.351	11.334
Ecad MO CO	Clone- Clone	h1b11	7.024	298.071	120.7	586.903	11.334
Ecad MO CO	Clone- Clone	h1b11	7.024	232.278	118.024	444.373	11.334
Ecad MO CO	Clone- Clone	h1b11	7.024	197.478	118.021	315.856	11.334
Ecad MO CO	Clone- Clone
Ecad MO CO	Clone- Clone	h1b12	8.916	477.595	185.948	1391.65	14.409
Ecad MO CO	Clone- Clone	h1b12	8.916	445.429	137.839	1202.536	14.409
Ecad MO CO	Clone- Clone	h1b12	8.916	414.242	165.588	968.678	14.409
Ecad MO CO	Clone- Clone	h1b12	8.916	359.955	138.12	714.849	14.409
Ecad MO CO	Clone- Clone	h1b12	8.916	313.319	119.277	1201.853	14.409
Ecad MO CO	Clone- Clone	h1b12	8.916	288.902	121.501	1301.262	14.409
Ecad MO CO	Clone- Clone	h1b12	8.916	261.683	121.777	929.37	14.409
Ecad MO CO	Clone- Clone	h2b1	9.726	727.965	195.003	3847.593	15.727
Ecad MO CO	Clone- Clone	h2b1	9.726	423.138	171.635	1001.891	15.727
Ecad MO CO	Clone- Clone	h2b1	9.726	286.166	126.183	1412.88	15.727
Ecad MO CO	Clone- Clone	h2b1	9.726	239.787	117.591	951.975	15.727
Ecad MO CO	Clone- Clone
Ecad MO CO	Clone- Clone	h2b2	9.942	717.725	161.168	3136.901	16.078
Ecad MO CO	Clone- Clone	h2b2	9.942	584.769	159.962	2138.896	16.078
Ecad MO CO	Clone- Clone	h2b2	9.942	365.398	141.807	909.806	16.078
Ecad MO CO	Clone- Clone	h2b2	9.942	254.769	108.865	712.081	16.078
Ecad MO CO	Clone- Clone	h2b2	9.942	204.787	106.096	569.343	16.078
Ecad MO CO	Clone- Clone
Ecad MO CO	Clone- Clone	h2b3	9.834	582.217	194.94	1705.48	15.902
Ecad MO CO	Clone- Clone	h2b3	9.834	653.018	212.728	2873.453	15.902
Ecad MO CO	Clone- Clone	h2b3	9.834	575.864	217.801	2579.465	15.902
Ecad MO CO	Clone- Clone	h2b3	9.834	423.874	178.779	2007.94	15.902
Ecad MO CO	Clone- Clone	h2b3	9.834	311.838	147.091	1641.128	15.902
Ecad MO CO	Clone- Clone
Ecad MO CO	Clone- Clone	h2b4	8.213	761.373	172.556	3081.817	13.267
Ecad MO CO	Clone- Clone	h2b4	8.213	554.294	134.813	1654.013	13.267
Ecad MO CO	Clone- Clone	h2b4	8.213	382.953	156.08	1118.068	13.267
Ecad MO CO	Clone- Clone	h2b4	8.213	284.54	124.978	958.038	13.267
Ecad MO CO	Clone- Clone
Ecad MO CO	Clone- Clone	h2b5	8.375	706.324	185.425	2450.066	13.527
Ecad MO CO	Clone- Clone	h2b5	8.375	448.722	159.544	1367.841	13.527
Ecad MO CO	Clone- Clone	h2b5	8.375	274.03	138.245	1814.253	13.527
Ecad MO CO	Clone- Clone	h2b5	8.375	186.967	103.302	588.531	13.527
Ecad MO CO	Clone- Clone
Ecad MO CO	Clone- Clone	h2b6	7.997	959.572	267.652	2837.279	12.915
Ecad MO CO	Clone- Clone	h2b6	7.997	552.735	178.658	1565.045	12.915
Ecad MO CO	Clone- Clone	h2b6	7.997	306.238	133.809	862.502	12.915
Ecad MO CO	Clone- Clone	h2b6	7.997	209.519	109.742	455.542	12.915
Ecad MO CO	Clone- Clone
Ecad MO CO	Clone- Clone	h3b1	14.859	497.208	113.614	3867.396	24.073
Ecad MO CO	Clone- Clone	h3b1	14.859	484.84	113.258	3402.178	24.073
Ecad MO CO	Clone- Clone	h3b1	15.454	438.891	134.425	1979.497	25.04
Ecad MO CO	Clone- Clone	h3b1	15.454	396.601	127.714	1675.957	25.04
Ecad MO CO	Clone- Clone	h3b1	15.454	348.245	109.923	1706.555	25.04
Ecad MO CO	Clone- Clone	h3b1	15.454	276.646	115.458	1133.303	25.04
Ecad MO CO	Clone- Clone	h3b1	15.454	204.303	96.434	589.49	25.04
Ecad MO CO	Clone- Clone
Ecad MO CO	Clone- Clone	h3b2	8.105	548.883	156.643	4095	13.091
Ecad MO CO	Clone- Clone	h3b2	8.105	519.871	147.311	4095	13.091
Ecad MO CO	Clone- Clone	h3b2	8.105	392.198	153.55	1531.098	13.091
Ecad MO CO	Clone- Clone	h3b2	8.105	299.262	141.815	858.536	13.091
Ecad MO CO	Clone- Clone	h3b2	8.105	238.835	112.309	860.525	13.091
Ecad MO CO	Clone- Clone	h3b2	8.105	189.51	109.412	557.852	13.091
Ecad MO CO	Clone- Clone	h3b2	8.105	152.448	101.927	286.48	13.091
Ecad MO CO	Clone- Clone
Ecad MO CO	Clone- Clone	h3b3	9.402	464.864	149.198	1372.728	15.199
Ecad MO CO	Clone- Clone	h3b3	9.402	486.692	166.347	1492.808	15.199
Ecad MO CO	Clone- Clone	h3b3	9.402	464.637	139.825	1328.325	15.199
Ecad MO CO	Clone- Clone	h3b3	9.402	423.085	141.525	1415.358	15.199
Ecad MO CO	Clone- Clone	h3b3	9.402	360.525	123.428	2678.681	15.199
Ecad MO CO	Clone- Clone	h3b3	9.402	297.772	110.359	3577.78	15.199
Ecad MO CO	Clone- Clone	h3b3	9.402	251.626	108.362	1693.714	15.199
Ecad MO CO	Clone- Clone
Ecad MO CO	Clone- Clone	h3b4	16.534	545.826	177.141	2308.79	26.797
Ecad MO CO	Clone- Clone	h3b4	16.534	598.574	167.031	2578.601	26.797
Ecad MO CO	Clone- Clone	h3b4	16.534	576.686	148.17	2347.028	26.797
Ecad MO CO	Clone- Clone	h3b4	16.534	481.46	136.004	2386.551	26.797
Ecad MO CO	Clone- Clone	h3b4	16.534	391.68	120.243	1267.401	26.797
Ecad MO CO	Clone- Clone	h3b4	16.534	317.467	130.772	1647.542	26.797
Ecad MO CO	Clone- Clone	h3b4	16.534	247.677	108.431	1756.638	26.797
Ecad MO CO	Clone- Clone	h3b4	16.534	196.835	107.223	1126.296	26.797
Ecad MO CO	Clone- Clone
Ecad MO CO	Clone- Clone	h3b5	16.534	576.686	148.17	2347.028	26.797
Ecad MO CO	Clone- Clone	h3b5	16.534	481.46	136.004	2386.551	26.797
Ecad MO CO	Clone- Clone	h3b5	16.534	391.68	120.243	1267.401	26.797
Ecad MO CO	Clone- Clone	h3b5	16.534	317.467	130.772	1647.542	26.797
Ecad MO CO	Clone- Clone	h3b5	16.534	247.677	108.431	1756.638	26.797
Ecad MO CO	Clone- Clone
Ecad MO CO	Clone- Clone	h3b6	3.836	470.321	147.54	1712.762	6.15
Ecad MO CO	Clone- Clone	h3b6	3.836	405.15	132.895	1834.761	6.15
Ecad MO CO	Clone- Clone	h3b6	3.836	323.355	133.219	1059.923	6.15
Ecad MO CO	Clone- Clone	h3b6	3.836	240.028	116.482	503.118	6.15
Ecad MO CO	Clone- Clone	h3b6	3.836	182.16	106.61	335.504	6.15
Ecad MO CO	Clone- Clone	h3b6	3.836	158.777	106.44	351.051	6.15
Ecad MO CO	Clone- Clone
Ecad MO CO	Clone- Clone	h3b7	8.591	455.774	139.453	1336.955	13.879
Ecad MO CO	Clone- Clone	h3b7	8.591	428.494	124.081	1485.517	13.879
Ecad MO CO	Clone- Clone	h3b7	8.591	352.508	125.375	1114.455	13.879
Ecad MO CO	Clone- Clone	h3b7	8.591	270.613	141.625	564.34	13.879
Ecad MO CO	Clone- Clone	h3b7	8.591	213.771	119.512	393.704	13.879
Ecad MO CO	Clone- Clone	h3b7	8.591	172.879	99.956	262.581	13.879
Ecad MO CO	Clone- Clone	h3b7	8.591	149.545	102.987	241.712	13.879
Ecad MO CO	Clone- Clone
Ecad MO CO	Clone- Clone	h3b8	6.97	438.065	106.388	1742.559	11.246
Ecad MO CO	Clone- Clone	h3b8	6.97	343.452	122.498	1432.517	11.246
Ecad MO CO	Clone- Clone	h3b8	6.97	266.945	115.956	782.756	11.246
Ecad MO CO	Clone- Clone	h3b8	6.97	214.243	113.212	501.804	11.246
Ecad MO CO	Clone- Clone	h3b8	6.97	177.252	110.692	376.494	11.246
Ecad MO CO	Clone- Clone
Ecad MO CO	Clone- Clone	h3b9	7.511	400.451	145.236	1448.02	12.124
Ecad MO CO	Clone- Clone	h3b9	7.511	319.651	137.144	1061.729	12.124
Ecad MO CO	Clone- Clone	h3b9	7.511	263.708	137.415	742.443	12.124
Ecad MO CO	Clone- Clone	h3b9	7.511	226.576	131.253	526.545	12.124
Ecad MO CO	Clone- Clone	h3b9	7.511	198.383	112.216	353.715	12.124
Ecad MO CO	Clone- Clone	h3b9	7.511	173.445	100.038	394.807	12.124
Ecad MO CO	Clone- Clone	h3b9	7.511	153.52	103.288	287.623	12.124
Ecad MO CO	Clone- Clone
Ecad MO CO	Clone- Clone	h3b10	11.347	382.658	135.92	2028.724	18.362
Ecad MO CO	Clone- Clone	h3b10	11.347	382.057	134.209	1223.554	18.362
Ecad MO CO	Clone- Clone	h3b10	11.347	369.195	130.118	1938.718	18.362
Ecad MO CO	Clone- Clone	h3b10	11.347	360.256	141.4	2653.625	18.362
Ecad MO CO	Clone- Clone	h3b10	11.347	334.89	120.766	2820.773	18.362
Ecad MO CO	Clone- Clone	h3b10	11.347	288.372	121.697	3509.877	18.362
Ecad MO CO	Clone- Clone	h3b10	11.347	239.024	102.825	1450.546	18.362
Ecad MO CO	Clone- Clone	h3b10	11.347	200.56	105.075	715.589	18.362
Ecad MO CO	Clone- Clone
Ecad MO CO	Clone- Clone	h3b11	13.076	522.721	137.143	1287.045	21.174
Ecad MO CO	Clone- Clone	h3b11	13.076	422.813	150.054	1039.904	21.174
Ecad MO CO	Clone- Clone	h3b11	13.076	351.746	138.867	1460.825	21.174
Ecad MO CO	Clone- Clone	h3b11	13.076	305.033	126.05	1955.438	21.174
Ecad MO CO	Clone- Clone	h3b11	13.076	259.833	123.664	2075.777	21.174
Ecad MO CO	Clone- Clone	h3b11	13.076	218.783	103.593	1873.4	21.174
Ecad MO CO	Clone- Clone	h3b11	13.076	180.437	104.984	923.054	21.174
Ecad MO CO	Clone- Clone
Ecad MO CO	Clone- Clone	h3b12	6.7	647.702	173.14	2313.599	10.806
Ecad MO CO	Clone- Clone	h3b12	6.7	538.423	154.062	2297.346	10.806
Ecad MO CO	Clone- Clone	h3b12	6.7	396.204	133.277	1243.949	10.806
Ecad MO CO	Clone- Clone	h3b12	6.7	287.669	133.455	650.72	10.806
Ecad MO CO	Clone- Clone	h3b12	6.7	209.886	106.443	437.538	10.806
Ecad MO CO	Clone- Clone	h3b12	6.7	166.567	107.623	307.985	10.806
Ecad MO CO	Clone- Clone	h4b1	11.725	293.959	110.576	2420.091	18.977
Ecad MO CO	Clone- Clone	h4b1	11.725	271.206	114.354	2028.223	18.977
Ecad MO CO	Clone- Clone	h4b1	11.725	229.958	99.659	960.672	18.977
Ecad MO CO	Clone- Clone	h4b1	11.725	189.94	106.03	518.753	18.977
Ecad MO CO	Clone- Clone	h4b1	11.725	165.366	108.92	302.95	18.977
Ecad MO CO	Clone- Clone
Ecad MO CO	Clone- Clone	h4b2	6.16	261.035	107.274	1945.618	9.928
Ecad MO CO	Clone- Clone	h4b2	6.16	245.522	106.721	1389.145	9.928
Ecad MO CO	Clone- Clone	h4b2	6.16	197.791	116.507	500.765	9.928
Ecad MO CO	Clone- Clone	h4b2	6.16	166.588	108.764	315.771	9.928
Ecad MO CO	Clone- Clone
Ecad MO CO	Clone- Clone	h4b3	15.238	257.187	104.175	1373.793	24.688
Ecad MO CO	Clone- Clone	h4b3	15.238	243.012	108.568	1117.388	24.688
Ecad MO CO	Clone- Clone	h4b3	12.05	298.633	115.733	955.038	19.505
Ecad MO CO	Clone- Clone	h4b3	12.05	284.34	119.971	769.491	19.505
Ecad MO CO	Clone- Clone	h4b3	12.05	233.858	112.719	484.208	19.505
Ecad MO CO	Clone- Clone	h4b3	12.05	190.76	108.288	616.942	19.505
Ecad MO CO	Clone- Clone
Ecad MO CO	Clone- Clone	h4b4	5.674	246.49	124.099	572.411	9.137
Ecad MO CO	Clone- Clone	h4b4	5.674	212.406	107.717	604.443	9.137
Ecad MO CO	Clone- Clone	h4b4	5.674	186.532	107.419	455.71	9.137
Ecad MO CO	Clone- Clone	h4b4	5.674	155.781	91.897	318.039	9.137
Ecad MO CO	Clone- Clone
Ecad MO CO	Clone- Clone	h5b1	8.429	151.006	101.799	470.362	13.618
Ecad MO CO	Clone- Clone	h5b1	8.429	151.219	98.777	397.667	13.618
Ecad MO CO	Clone- Clone	h5b1	8.429	150.01	101.06	400.346	13.618
Ecad MO CO	Clone- Clone	h5b1	8.429	148.372	96.388	434.896	13.618
Ecad MO CO	Clone- Clone	h5b1	8.429	142.745	98.308	395.519	13.618
Ecad MO CO	Clone- Clone	h5b1	8.429	137.238	100.996	311.343	13.618
Ecad MO CO	Clone- Clone
Ecad MO CO	Clone- Clone	h5b2	8.862	193.702	99.402	1798.792	14.321
Ecad MO CO	Clone- Clone	h5b2	8.862	185.025	99.156	2865.322	14.321
Ecad MO CO	Clone- Clone	h5b2	8.862	181.925	95.605	3856.428	14.321
Ecad MO CO	Clone- Clone	h5b2	8.862	182.397	98.181	4095	14.321
Ecad MO CO	Clone- Clone	h5b2	8.862	163.89	97.646	3332.81	14.321
Ecad MO CO	Clone- Clone	h5b2	8.862	152.912	95.247	1258.834	14.321
Ecad MO CO	Clone- Clone
Ecad MO CO	Clone- Clone	h5b3	10.321	132.55	97.972	311.791	16.693
Ecad MO CO	Clone- Clone	h5b3	10.321	133.263	98.799	290.464	16.693
Ecad MO CO	Clone- Clone	h5b3	10.321	138.595	97.104	365.922	16.693
Ecad MO CO	Clone- Clone	h5b3	10.321	139.07	96.456	311.743	16.693
Ecad MO CO	Clone- Clone	h5b3	10.321	138.526	99.132	327.896	16.693
Ecad MO CO	Clone- Clone	h5b3	10.321	137.884	98.93	303.538	16.693
Ecad MO CO	Clone- Clone
Ecad MO CO	Clone- Clone	h5b4	8.862	174.614	100.399	2632.923	14.321
Ecad MO CO	Clone- Clone	h5b4	8.862	160.811	98.032	1085.411	14.321
Ecad MO CO	Clone- Clone	h5b4	8.862	150.696	100.863	506.366	14.321
Ecad MO CO	Clone- Clone	h5b4	8.862	142.879	100.464	424.655	14.321
Ecad MO CO	Clone- Clone	h5b4	8.862	139.979	99.316	343.59	14.321
Ecad MO CO	Clone- Clone	h5b4	8.862	138.178	95.939	337.741	14.321
Ecad MO CO	Clone- Clone	h5b4	8.862	137.143	98.079	309.715	14.321
Ecad MO CO	Clone- Clone	h5b4	8.862	139.761	99.223	375.16	14.321
Ecad MO CO	Clone- Clone	h5b4	8.862	138.112	99.459	421.156	14.321
Ecad MO CO	Clone- Clone	h5b4	8.862	139.421	98.498	439.48	14.321
Ecad MO CO	Clone- Clone
Ecad MO CO	Clone- Clone	h5b5	8.862	193.702	99.402	1798.792	14.321
Ecad MO CO	Clone- Clone	h5b5	8.862	185.025	99.156	2865.322	14.321
Ecad MO CO	Clone- Clone	h5b5	8.862	181.925	95.605	3856.428	14.321
Ecad MO CO	Clone- Clone	h5b5	8.862	182.397	98.181	4095	14.321
Ecad MO CO	Clone- Clone	h5b5	8.862	163.89	97.646	3332.81	14.321
Ecad MO CO	Clone- Clone	h5b5	8.862	152.912	95.247	1258.834	14.321
Ecad MO CO	Clone- Clone
Ecad MO CO	Clone- Clone	h5b6	10.321	132.55	97.972	311.791	16.693
Ecad MO CO	Clone- Clone	h5b6	10.321	133.263	98.799	290.464	16.693
Ecad MO CO	Clone- Clone	h5b6	10.321	138.595	97.104	365.922	16.693
Ecad MO CO	Clone- Clone	h5b6	10.321	139.07	96.456	311.743	16.693
Ecad MO CO	Clone- Clone	h5b6	10.321	138.526	99.132	327.896	16.693
Ecad MO CO	Clone- Clone	h5b6	10.321	137.884	98.93	303.538	16.693
Ecad MO CO	Clone- Clone
Ecad MO CO	Clone- Clone	h5b7	8.862	174.614	100.399	2632.923	14.321
Ecad MO CO	Clone- Clone	h5b7	8.862	160.811	98.032	1085.411	14.321
Ecad MO CO	Clone- Clone	h5b7	8.862	150.696	100.863	506.366	14.321
Ecad MO CO	Clone- Clone	h5b7	8.862	142.879	100.464	424.655	14.321
Ecad MO CO	Clone- Clone	h5b7	8.862	139.979	99.316	343.59	14.321
Ecad MO CO	Clone- Clone	h5b7	8.862	138.178	95.939	337.741	14.321
Ecad MO CO	Clone- Clone	h5b7	8.862	137.143	98.079	309.715	14.321
Ecad MO CO	Clone- Clone	h5b7	8.862	139.761	99.223	375.16	14.321
Ecad MO CO	Clone- Clone	h5b7	8.862	138.112	99.459	421.156	14.321
Ecad MO CO	Clone- Clone	h5b7	8.862	139.421	98.498	439.48	14.321
Ecad MO PO	Non Clone- Clone	h1b1	5.403	439.453	178.48	1529.346	8.698
Ecad MO PO	Non Clone- Clone	h1b1	5.403	336.225	156.212	1054.617	8.698
Ecad MO PO	Non Clone- Clone	h1b1	5.403	267.605	145.396	546.477	8.698
Ecad MO PO	Non Clone- Clone	h1b1	5.403	227.304	125.977	391.217	8.698
Ecad MO PO	Non Clone- Clone	h1b1	5.403	203.738	118.662	451.405	8.698
Ecad MO PO	Non Clone- Clone	h1b1	5.403	192.477	117.632	538.12	8.698
Ecad MO PO	Non Clone- Clone
Ecad MO PO	Non Clone- Clone	h1b2	7.619	585.11	155.919	2509.642	12.3
Ecad MO PO	Non Clone- Clone	h1b2	7.619	634.08	159.957	3001.65	12.3
Ecad MO PO	Non Clone- Clone	h1b2	7.619	624.028	174.19	2150.035	12.3
Ecad MO PO	Non Clone- Clone	h1b2	7.619	578.824	156.065	1854.675	12.3
Ecad MO PO	Non Clone- Clone	h1b2	7.619	508.726	171.576	1338.826	12.3
Ecad MO PO	Non Clone- Clone	h1b2	7.619	410.434	162.395	1392.692	12.3
Ecad MO PO	Non Clone- Clone	h1b2	7.619	333.281	141.086	1159.085	12.3
Ecad MO PO	Non Clone- Clone	h1b2	7.619	281.027	134.231	827.258	12.3
Ecad MO PO	Non Clone- Clone	h1b2	7.619	237.867	141.803	544.247	12.3
Ecad MO PO	Non Clone- Clone
Ecad MO PO	Non Clone- Clone	h1b3	11.185	402.406	141.003	1474.373	18.099
Ecad MO PO	Non Clone- Clone	h1b3	11.185	351.339	132.548	1373.227	18.099
Ecad MO PO	Non Clone- Clone	h1b3	11.185	306.873	149.174	1403.396	18.099
Ecad MO PO	Non Clone- Clone	h1b3	11.185	282.029	137.787	1385.772	18.099
Ecad MO PO	Non Clone- Clone	h1b3	11.185	249.29	123.383	1196.688	18.099
Ecad MO PO	Non Clone- Clone	h1b3	11.185	219.956	114.656	641.302	18.099
Ecad MO PO	Non Clone- Clone
Ecad MO PO	Non Clone- Clone	h1b4	7.511	509.378	142.02	1680.186	12.125
Ecad MO PO	Non Clone- Clone	h1b4	7.511	479.843	127.431	1356.82	12.125
Ecad MO PO	Non Clone- Clone	h1b4	7.511	442.27	145.229	964.983	12.125
Ecad MO PO	Non Clone- Clone	h1b4	7.511	387.805	140.327	1001.531	12.125
Ecad MO PO	Non Clone- Clone	h1b4	7.511	335.409	122.348	970.01	12.125
Ecad MO PO	Non Clone- Clone	h1b4	7.511	283.664	115.903	1110.243	12.125
Ecad MO PO	Non Clone- Clone	h1b4	7.511	239.743	97.541	1015.869	12.125
Ecad MO PO	Non Clone- Clone	h1b4	7.511	216.177	105.041	866.578	12.125
Ecad MO PO	Non Clone- Clone	h1b4	7.511	182.907	102.481	671.159	12.125
Ecad MO PO	Non Clone- Clone
Ecad MO PO	Non Clone- Clone	h1b5	7.078	514.26	185.418	1612.869	11.422
Ecad MO PO	Non Clone- Clone	h1b5	7.078	445.786	152.021	1082.899	11.422
Ecad MO PO	Non Clone- Clone	h1b5	7.078	331.796	156.013	881.277	11.422
Ecad MO PO	Non Clone- Clone	h1b5	7.078	257.039	128.507	569.363	11.422
Ecad MO PO	Non Clone- Clone	h1b5	7.078	212.037	114.762	553.966	11.422
Ecad MO PO	Non Clone- Clone	h1b5	7.078	181.454	118.589	301.713	11.422
Ecad MO PO	Non Clone- Clone	h2b1	9.402	881.421	296.627	2022.836	15.171
Ecad MO PO	Non Clone- Clone	h2b1	9.402	650.408	275.005	1428.411	15.171
Ecad MO PO	Non Clone- Clone	h2b1	9.402	433.401	178.72	1206.541	15.171
Ecad MO PO	Non Clone- Clone	h2b1	9.402	294.051	154.8	724.852	15.171
Ecad MO PO	Non Clone- Clone
Ecad MO PO	Non Clone- Clone	h2b2	10.483	726.237	180.994	1893.644	16.957
Ecad MO PO	Non Clone- Clone	h2b2	10.483	457.348	198.126	1016.836	16.957
Ecad MO PO	Non Clone- Clone	h2b2	10.483	328.966	152.876	1664.567	16.957
Ecad MO PO	Non Clone- Clone	h2b2	10.483	263.445	112.687	1492.146	16.957
Ecad MO PO	Non Clone- Clone
Ecad MO PO	Non Clone- Clone	h2b3	11.563	719.299	142.598	2782.37	18.714
Ecad MO PO	Non Clone- Clone	h2b3	11.563	513.992	162.938	1094.128	18.714
Ecad MO PO	Non Clone- Clone	h2b3	11.563	331.013	151.837	1125.377	18.714
Ecad MO PO	Non Clone- Clone	h2b3	11.563	273.168	124.363	1193.688	18.714
Ecad MO PO	Non Clone- Clone	h2b3	11.563	240.642	112.79	1417.869	18.714
Ecad MO PO	Non Clone- Clone	h3b1	13.671	298.637	105.358	1670.609	22.14
Ecad MO PO	Non Clone- Clone	h3b1	13.671	371.572	114.722	1855.516	22.14
Ecad MO PO	Non Clone- Clone	h3b1	13.671	436.096	112.221	1815.287	22.14
Ecad MO PO	Non Clone- Clone	h3b1	13.671	449.86	119.959	1923.378	22.14
Ecad MO PO	Non Clone- Clone	h3b1	13.671	414.485	126.547	3505.415	22.14
Ecad MO PO	Non Clone- Clone	h3b1	13.671	365.035	126.553	3577.828	22.14
Ecad MO PO	Non Clone- Clone	h3b1	13.671	302.613	112.96	1643.221	22.14
Ecad MO PO	Non Clone- Clone
Ecad MO PO	Non Clone- Clone	h3b2	8.7	824.439	243.081	2788.061	14.057
Ecad MO PO	Non Clone- Clone	h3b2	8.7	852.919	258.552	3195.227	14.057
Ecad MO PO	Non Clone- Clone	h3b2	8.7	739.478	263.287	2404.164	14.057
Ecad MO PO	Non Clone- Clone	h3b2	8.7	573.752	164.379	1822.071	14.057
Ecad MO PO	Non Clone- Clone	h3b2	8.7	426.658	169.906	1378.706	14.057
Ecad MO PO	Non Clone- Clone	h3b2	8.7	306.658	151.689	798.515	14.057
Ecad MO PO	Non Clone- Clone	h3b2	8.7	226.903	121.334	592.277	14.057
Ecad MO PO	Non Clone- Clone	h3b2	8.7	174.001	106.469	526.879	14.057
Ecad MO PO	Non Clone- Clone
Ecad MO PO	Non Clone- Clone	h3b3	10.807	756.386	174.433	3879.975	17.484
Ecad MO PO	Non Clone- Clone	h3b3	10.807	714.996	169.903	3664.274	17.484
Ecad MO PO	Non Clone- Clone	h3b3	10.375	630.119	159.591	2036.456	16.781
Ecad MO PO	Non Clone- Clone	h3b3	10.375	454.09	132.587	1787.099	16.781
Ecad MO PO	Non Clone- Clone	h3b3	10.375	317.925	118.656	1184.318	16.781
Ecad MO PO	Non Clone- Clone	h3b3	10.375	253.17	119.545	695.881	16.781
Ecad MO PO	Non Clone- Clone	h3b3	10.375	209.917	99.067	487.29	16.781
Ecad MO PO	Non Clone- Clone	h3b3	10.375	181.124	106.751	403.07	16.781
Ecad MO PO	Non Clone- Clone
Ecad MO PO	Non Clone- Clone	h3b4	8.97	533.037	212.998	2033.5	14.494
Ecad MO PO	Non Clone- Clone	h3b4	8.97	489.107	167.948	1803.465	14.494
Ecad MO PO	Non Clone- Clone	h3b4	8.97	397.522	152.008	1321.876	14.494
Ecad MO PO	Non Clone- Clone	h3b4	8.97	297.902	134.449	800.997	14.494
Ecad MO PO	Non Clone- Clone	h3b4	8.97	243.857	123.739	517.329	14.494
Ecad MO PO	Non Clone- Clone	h3b4	8.97	202.891	104.888	426.967	14.494
Ecad MO PO	Non Clone- Clone	h3b4	8.97	170.591	108.629	291.439	14.494
Ecad MO PO	Non Clone- Clone
Ecad MO PO	Non Clone- Clone	h3b4	3.89	743.39	216.152	3020.946	6.238
Ecad MO PO	Non Clone- Clone	h3b4	3.89	703.116	218.148	1993.536	6.238
Ecad MO PO	Non Clone- Clone	h3b4	3.89	558.053	214.241	1233.952	6.238
Ecad MO PO	Non Clone- Clone	h3b4	3.89	444.352	223.399	802.927	6.238
Ecad MO PO	Non Clone- Clone	h3b4	3.89	333.609	144.458	589.907	6.238
Ecad MO PO	Non Clone- Clone	h3b4	3.89	236.763	154.945	379.241	6.238
Ecad MO PO	Non Clone- Clone	h3b4	3.89	174.133	117.002	283.068	6.238
Ecad MO PO	Non Clone- Clone
Ecad MO PO	Non Clone- Clone	h3b5	7.727	801.663	192.648	2146.548	12.476
Ecad MO PO	Non Clone- Clone	h3b5	7.727	705.932	203.802	2309.795	12.476
Ecad MO PO	Non Clone- Clone	h3b5	7.727	525.463	214.068	2387.588	12.476
Ecad MO PO	Non Clone- Clone	h3b5	7.727	398.631	175.883	2189.983	12.476
Ecad MO PO	Non Clone- Clone	h3b5	7.727	315.019	143.65	1003.564	12.476
Ecad MO PO	Non Clone- Clone	h3b5	7.727	253.523	122.218	533.119	12.476
Ecad MO PO	Non Clone- Clone	h3b5	7.727	215.922	118.484	589.225	12.476
Ecad MO PO	Non Clone- Clone	h3b5	7.727	209.091	105.661	929.421	12.476
Ecad MO PO	Non Clone- Clone
Ecad MO PO	Non Clone- Clone	h4b1	12.158	252.42	105.649	1665.408	19.68
Ecad MO PO	Non Clone- Clone	h4b1	12.158	247.961	102.246	1238.447	19.68
Ecad MO PO	Non Clone- Clone	h4b1	12.158	228.994	97.229	1650.013	19.68
Ecad MO PO	Non Clone- Clone	h4b1	12.158	202.736	103.994	969.1	19.68
Ecad MO PO	Non Clone- Clone	h4b1	12.158	171.147	100.512	669.824	19.68
Ecad MO PO	Non Clone- Clone	h4b1	12.158	149.963	96.784	394.584	19.68
Ecad MO PO	Non Clone- Clone
Ecad MO PO	Non Clone- Clone	h4b2	10.104	365.689	133.562	4084.374	16.342
Ecad MO PO	Non Clone- Clone	h4b2	10.104	315.896	105.726	3994.01	16.342
Ecad MO PO	Non Clone- Clone	h4b2	10.104	250.729	109.136	1428.927	16.342
Ecad MO PO	Non Clone- Clone	h4b2	10.104	210.655	108.885	932.121	16.342
Ecad MO PO	Non Clone- Clone	h4b2	10.104	186.382	105.506	539.47	16.342
Ecad MO PO	Non Clone- Clone
Ecad MO PO	Non Clone- Clone	h4b3	15.508	251.412	108.331	1483.597	25.128
Ecad MO PO	Non Clone- Clone	h4b3	15.508	277.662	109.306	1887.589	25.128
Ecad MO PO	Non Clone- Clone	h4b3	15.508	285.544	110.446	2406.306	25.128
Ecad MO PO	Non Clone- Clone	h4b3	15.508	270.662	100.068	1444.093	25.128
Ecad MO PO	Non Clone- Clone	h4b3	15.508	243.588	106.908	976.769	25.128
Ecad MO PO	Non Clone- Clone	h4b3	15.508	212.76	103.762	887.708	25.128
Ecad MO PO	Non Clone- Clone	h5b1	4.701	184.954	100.452	900.373	7.556
Ecad MO PO	Non Clone- Clone	h5b1	4.701	184.993	100.066	623.543	7.556
Ecad MO PO	Non Clone- Clone	h5b1	4.701	177.432	101.171	520.114	7.556
Ecad MO PO	Non Clone- Clone	h5b1	4.701	168.806	100.374	624.347	7.556
Ecad MO PO	Non Clone- Clone	h5b1	4.701	160.987	91.311	710.467	7.556
Ecad MO PO	Non Clone- Clone	h5b1	4.701	148.881	100.511	573.736	7.556
Ecad MO PO	Non Clone- Clone	h5b1	4.701	140.519	94.974	302.661	7.556
Ecad MO PO	Non Clone- Clone
Ecad MO PO	Non Clone- Clone	h5b2	7.889	148.694	99.246	443.468	12.739
Ecad MO PO	Non Clone- Clone	h5b2	7.889	151.904	99.793	530.997	12.739
Ecad MO PO	Non Clone- Clone	h5b2	7.889	148.336	97.61	447.365	12.739
Ecad MO PO	Non Clone- Clone	h5b2	7.889	142.913	99.182	294.01	12.739
Ecad MO PO	Non Clone- Clone	h5b2	7.889	140.697	98.426	349.332	12.739
Ecad MO PO	Non Clone- Clone	h5b2	7.889	138.857	100.603	365.368	12.739
Ecad MO PO	Non Clone- Clone
Ecad MO PO	Non Clone- Clone	h5b3	10.104	232.261	105.597	689.239	16.342
Ecad MO PO	Non Clone- Clone	h5b3	10.104	224.509	105.325	837.212	16.342
Ecad MO PO	Non Clone- Clone	h5b3	10.104	215.412	104.732	869.439	16.342
Ecad MO PO	Non Clone- Clone	h5b3	10.104	200.71	101.78	921.266	16.342
Ecad MO PO	Non Clone- Clone	h5b3	10.104	175.493	96.978	488.631	16.342
Ecad MO PO	Non Clone- Clone	h5b3	10.104	163.732	99.952	378.702	16.342
Ecad MO PO	Non Clone- Clone
Ecad MO PO	Non Clone- Clone	h5b4	10.05	312.921	115.655	927.24	16.254
Ecad MO PO	Non Clone- Clone	h5b4	10.05	292.543	113.225	851.411	16.254
Ecad MO PO	Non Clone- Clone	h5b4	10.05	251.916	123.944	694.38	16.254
Ecad MO PO	Non Clone- Clone	h5b4	10.05	199.002	105.732	446.411	16.254
Ecad MO PO	Non Clone- Clone	h5b4	10.05	162.091	107.802	300.036	16.254
Ecad MO PO	Non Clone- Clone	h5b4	10.05	149.352	103.923	322.845	16.254
Ecad MO PO	Non Clone- Clone
Ecad MO PO	Non Clone- Clone	h5b5	4.053	351.08	139.385	1162.817	6.502
Ecad MO PO	Non Clone- Clone	h5b5	4.053	367.48	153.564	758.423	6.502
Ecad MO PO	Non Clone- Clone	h5b5	4.053	353.792	166.294	658.617	6.502
Ecad MO PO	Non Clone- Clone	h5b5	4.053	304.144	142.97	774.733	6.502
Ecad MO PO	Non Clone- Clone	h5b5	4.053	242.235	124.963	623.927	6.502
Ecad MO PO	Non Clone- Clone	h5b5	4.053	211.779	120.149	477.578	6.502
Ecad MO PO	Non Clone- Clone	h5b5	4.053	186.34	116.945	428.318	6.502
Ecad MO PO	Non Clone- Clone
Ecad MO PO	Non Clone- Clone	h5b6	6.268	165.084	103.789	450.234	10.104
Ecad MO PO	Non Clone- Clone	h5b6	6.268	155.253	101.054	320.564	10.104
Ecad MO PO	Non Clone- Clone	h5b6	6.268	143.768	94.693	309.684	10.104
Ecad MO PO	Non Clone- Clone	h5b6	6.268	135.885	101.208	280.04	10.104
Ecad MO PO	Non Clone- Clone	h5b6	6.268	130.401	97.916	214.041	10.104
Ecad MO NO	Non Clone- Non Clone	h1b1	10.861	599.332	204.753	1547.545	17.572
Ecad MO NO	Non Clone- Non Clone	h1b1	10.861	517.362	200.011	1440.36	17.572
Ecad MO NO	Non Clone- Non Clone	h1b1	10.861	398.732	154.729	1088.746	17.572
Ecad MO NO	Non Clone- Non Clone	h1b1	10.861	333.511	139.877	894.217	17.572
Ecad MO NO	Non Clone- Non Clone	h1b1	10.861	281.086	128.603	633.387	17.572
Ecad MO NO	Non Clone- Non Clone	h1b1	10.861	232.657	124.45	504.763	17.572
Ecad MO NO	Non Clone- Non Clone	h1b1	10.861	194.41	105.351	425.77	17.572
Ecad MO NO	Non Clone- Non Clone
Ecad MO NO	Non Clone- Non Clone	h1b2	6.646	628.255	170.716	2219.899	10.719
Ecad MO NO	Non Clone- Non Clone	h1b2	6.646	593.508	142.171	2211.046	10.719
Ecad MO NO	Non Clone- Non Clone	h1b2	6.646	553.17	155.736	2070.268	10.719
Ecad MO NO	Non Clone- Non Clone	h1b2	6.646	454.5	139.371	1543.738	10.719
Ecad MO NO	Non Clone- Non Clone	h1b2	6.646	343.894	158.107	860.103	10.719
Ecad MO NO	Non Clone- Non Clone	h1b2	6.646	293.227	138.255	739.92	10.719
Ecad MO NO	Non Clone- Non Clone	h1b2	6.646	266.514	134.492	807.316	10.719
Ecad MO NO	Non Clone- Non Clone
Ecad MO NO	Non Clone- Non Clone	h1b3	8.105	485.477	133.221	2123.206	13.084
Ecad MO NO	Non Clone- Non Clone	h1b3	8.105	462.87	138.968	2008.791	13.084
Ecad MO NO	Non Clone- Non Clone	h1b3	8.105	398.884	129.946	1250.585	13.084
Ecad MO NO	Non Clone- Non Clone	h1b3	8.105	364.897	132.875	1127.163	13.084
Ecad MO NO	Non Clone- Non Clone	h1b3	8.105	337.332	131.492	1165.162	13.084
Ecad MO NO	Non Clone- Non Clone
Ecad MO NO	Non Clone- Non Clone	h1b4	8.267	718.526	182.926	1765.522	13.354
Ecad MO NO	Non Clone- Non Clone	h1b4	8.267	660.972	207.308	1631.72	13.354
Ecad MO NO	Non Clone- Non Clone	h1b4	8.267	566.991	188.86	1345.524	13.354
Ecad MO NO	Non Clone- Non Clone	h1b4	8.267	459.482	188.47	1351.679	13.354
Ecad MO NO	Non Clone- Non Clone	h1b4	8.267	341.733	158.874	1386.551	13.354
Ecad MO NO	Non Clone- Non Clone	h1b4	8.267	263.251	123.883	1087.818	13.354
Ecad MO NO	Non Clone- Non Clone
Ecad MO NO	Non Clone- Non Clone	h1b5	8.591	705.354	186.169	1936.699	13.882
Ecad MO NO	Non Clone- Non Clone	h1b5	8.591	713.331	217.492	2009.868	13.882
Ecad MO NO	Non Clone- Non Clone	h1b5	8.591	709.554	213.962	2003.862	13.882
Ecad MO NO	Non Clone- Non Clone	h1b5	8.591	679.605	182.481	1978.64	13.882
Ecad MO NO	Non Clone- Non Clone	h1b5	8.591	594.575	196.188	1511.16	13.882
Ecad MO NO	Non Clone- Non Clone	h1b5	8.591	524.927	179.898	1265.907	13.882
Ecad MO NO	Non Clone- Non Clone	h1b5	8.591	447.293	178.377	1154.088	13.882
Ecad MO NO	Non Clone- Non Clone	h1b5	8.591	360.095	151.678	1030.968	13.882
Ecad MO NO	Non Clone- Non Clone	h1b5	8.591	281.535	133.985	876.982	13.882
Ecad MO NO	Non Clone- Non Clone
Ecad MO NO	Non Clone- Non Clone	h1b6	4.701	609.238	0	1386.228	7.556
Ecad MO NO	Non Clone- Non Clone	h1b6	4.701	607.392	0	1644.974	7.556
Ecad MO NO	Non Clone- Non Clone	h1b6	4.701	569.873	0	2117.439	7.556
Ecad MO NO	Non Clone- Non Clone	h2b1	12.104	866.487	306.636	3778.802	19.592
Ecad MO NO	Non Clone- Non Clone	h2b1	12.104	1006.048	369.372	3510.739	19.592
Ecad MO NO	Non Clone- Non Clone	h2b1	12.104	843.058	321.263	2769.895	19.592
Ecad MO NO	Non Clone- Non Clone	h2b1	12.104	556.321	225.799	4002.375	19.592
Ecad MO NO	Non Clone- Non Clone	h2b1	12.104	417.604	146.936	4095	19.592
Ecad MO NO	Non Clone- Non Clone	h2b1	12.104	302.199	134.019	1692.997	19.592
Ecad MO NO	Non Clone- Non Clone
Ecad MO NO	Non Clone- Non Clone	h2b2	9.51	1006.999	254.824	4093.911	15.375
Ecad MO NO	Non Clone- Non Clone	h2b2	9.51	971.052	240.256	3757.152	15.375
Ecad MO NO	Non Clone- Non Clone	h2b2	9.51	630.578	267.864	1926.784	15.375
Ecad MO NO	Non Clone- Non Clone	h2b2	9.51	352.776	152.246	1007.12	15.375
Ecad MO NO	Non Clone- Non Clone
Ecad MO NO	Non Clone- Non Clone	h2b3	12.158	757.682	182.224	3252.553	19.68
Ecad MO NO	Non Clone- Non Clone	h2b3	12.158	762.614	190.223	2594.421	19.68
Ecad MO NO	Non Clone- Non Clone	h2b3	12.158	637.954	198.121	2350.743	19.68
Ecad MO NO	Non Clone- Non Clone	h2b3	12.158	388.618	153.676	1444.468	19.68
Ecad MO NO	Non Clone- Non Clone	h2b3	12.158	251.698	127.609	653.181	19.68
Ecad MO NO	Non Clone- Non Clone
Ecad MO NO	Non Clone- Non Clone	h2b4	8.808	921.794	174.397	4087.167	14.233
Ecad MO NO	Non Clone- Non Clone	h2b4	8.808	829.293	211.625	2692.36	14.233
Ecad MO NO	Non Clone- Non Clone	h2b4	8.808	510.06	207.481	3072.19	14.233
Ecad MO NO	Non Clone- Non Clone	h2b4	8.808	329.885	134.265	1739.329	14.233
Ecad MO NO	Non Clone- Non Clone	h2b4	8.808	243.334	121.293	867.464	14.233
Ecad MO NO	Non Clone- Non Clone
Ecad MO NO	Non Clone- Non Clone	h2b5	7.295	703.519	260.496	1663.33	11.773
Ecad MO NO	Non Clone- Non Clone	h2b5	7.295	577.481	272.75	1373.212	11.773
Ecad MO NO	Non Clone- Non Clone	h2b5	7.295	484.218	201.093	1966.075	11.773
Ecad MO NO	Non Clone- Non Clone	h2b5	7.295	366.092	146.28	2339.541	11.773
Ecad MO NO	Non Clone- Non Clone
Ecad MO NO	Non Clone- Non Clone	h2b6	6.214	1041.802	250.801	4095	10.016
Ecad MO NO	Non Clone- Non Clone	h2b6	6.214	831.549	277.732	3639.612	10.016
Ecad MO NO	Non Clone- Non Clone	h2b6	6.214	465.054	199.208	849.333	10.016
Ecad MO NO	Non Clone- Non Clone	h2b6	6.214	300.172	151.105	617.678	10.016
Ecad MO NO	Non Clone- Non Clone	h3b1	9.024	709.49	207.335	1880.923	14.585
Ecad MO NO	Non Clone- Non Clone	h3b1	9.024	744.778	229.903	2033.364	14.585
Ecad MO NO	Non Clone- Non Clone	h3b1	9.024	709.974	222.406	2382.675	14.585
Ecad MO NO	Non Clone- Non Clone	h3b1	9.024	630.186	190.797	2418.14	14.585
Ecad MO NO	Non Clone- Non Clone	h3b1	9.024	516.847	206.518	2070.767	14.585
Ecad MO NO	Non Clone- Non Clone	h3b1	9.024	375.772	144.321	861.873	14.585
Ecad MO NO	Non Clone- Non Clone	h3b1	9.024	293.676	139.595	1245.248	14.585
Ecad MO NO	Non Clone- Non Clone	h3b1	9.024	263.431	134.332	1153.386	14.585
Ecad MO NO	Non Clone- Non Clone	h3b1	9.024	245.03	115.72	957.679	14.585
Ecad MO NO	Non Clone- Non Clone
Ecad MO NO	Non Clone- Non Clone	h3b2	9.888	597.794	168.348	2979.065	15.99
Ecad MO NO	Non Clone- Non Clone	h3b2	9.888	639.741	213.51	2083.944	15.99
Ecad MO NO	Non Clone- Non Clone	h3b2	9.888	623.085	205.537	1782.638	15.99
Ecad MO NO	Non Clone- Non Clone	h3b2	9.888	551.259	212.413	1505.506	15.99
Ecad MO NO	Non Clone- Non Clone	h3b2	9.888	455.401	184.17	1058.933	15.99
Ecad MO NO	Non Clone- Non Clone	h3b2	9.888	371.39	165.931	1226.854	15.99
Ecad MO NO	Non Clone- Non Clone	h3b2	9.888	318.299	147.294	1146.289	15.99
Ecad MO NO	Non Clone- Non Clone	h3b2	9.888	274.588	122.722	927.95	15.99
Ecad MO NO	Non Clone- Non Clone	h3b2	9.888	223.945	100.78	1051.901	15.99
Ecad MO NO	Non Clone- Non Clone
Ecad MO NO	Non Clone- Non Clone	h3b3	9.726	700.626	196.131	4095	15.727
Ecad MO NO	Non Clone- Non Clone	h3b3	9.726	693.509	193.842	4080.521	15.727
Ecad MO NO	Non Clone- Non Clone	h3b3	9.726	577.527	208.717	1767.23	15.727
Ecad MO NO	Non Clone- Non Clone	h3b3	9.726	443.783	185.142	1413.226	15.727
Ecad MO NO	Non Clone- Non Clone	h3b3	9.726	353.907	154.043	1334.049	15.727
Ecad MO NO	Non Clone- Non Clone	h3b3	9.726	287.985	129.15	875.72	15.727
Ecad MO NO	Non Clone- Non Clone
Ecad MO NO	Non Clone- Non Clone	h3b4	8.105	571.382	187.089	1419.036	13.084
Ecad MO NO	Non Clone- Non Clone	h3b4	8.105	444.361	189.776	1149.463	13.084
Ecad MO NO	Non Clone- Non Clone	h3b4	8.105	330.795	149.457	1108.373	13.084
Ecad MO NO	Non Clone- Non Clone	h3b4	8.105	259.675	136.882	798.959	13.084
Ecad MO NO	Non Clone- Non Clone	h3b4	8.105	208.712	113.814	420.997	13.084
Ecad MO NO	Non Clone- Non Clone	h3b4	8.105	172.315	111.036	358.45	13.084
Ecad MO NO	Non Clone- Non Clone	h3b4	8.105	154.232	105.126	365.583	13.084
Ecad MO NO	Non Clone- Non Clone	h4b1	15.4	335.276	107.855	2230.684	24.952
Ecad MO NO	Non Clone- Non Clone	h4b1	15.4	291.43	110.722	1489.672	24.952
Ecad MO NO	Non Clone- Non Clone	h4b1	15.4	246.87	109.802	708.737	24.952
Ecad MO NO	Non Clone- Non Clone	h4b1	15.4	215.123	111.404	1189.594	24.952
Ecad MO NO	Non Clone- Non Clone	h4b1	15.4	190.742	107.022	1990.496	24.952
Ecad MO NO	Non Clone- Non Clone	h4b1	15.4	171.321	99.239	2440.059	24.952
Ecad MO NO	Non Clone- Non Clone
Ecad MO NO	Non Clone- Non Clone	h4b2	10.753	335.901	99.195	2363.437	17.396
Ecad MO NO	Non Clone- Non Clone	h4b2	10.753	316.838	107.637	1034.129	17.396
Ecad MO NO	Non Clone- Non Clone	h4b2	10.753	270.203	108.94	918.398	17.396
Ecad MO NO	Non Clone- Non Clone	h4b2	10.753	219.723	106.01	781.86	17.396
Ecad MO NO	Non Clone- Non Clone	h4b2	10.753	184.982	103.627	536.235	17.396
Ecad MO NO	Non Clone- Non Clone
Ecad MO NO	Non Clone- Non Clone	h4b3	13.563	355.076	125.596	1698.795	21.965
Ecad MO NO	Non Clone- Non Clone	h4b3	13.563	369.036	122.994	2619.973	21.965
Ecad MO NO	Non Clone- Non Clone	h4b3	13.563	367.033	142.178	3834.606	21.965
Ecad MO NO	Non Clone- Non Clone	h4b3	13.563	341.095	130.589	3954.771	21.965
Ecad MO NO	Non Clone- Non Clone	h4b3	13.563	294.452	122.229	2602.118	21.965
Ecad MO NO	Non Clone- Non Clone
Ecad MO NO	Non Clone- Non Clone	h4b4	12.644	326.868	116.991	1382.969	20.471
Ecad MO NO	Non Clone- Non Clone	h4b4	12.644	292.373	124.114	1309.384	20.471
Ecad MO NO	Non Clone- Non Clone	h4b4	12.644	227.625	110.101	977.475	20.471
Ecad MO NO	Non Clone- Non Clone	h4b4	12.644	181.52	106.842	656.165	20.471
Ecad MO NO	Non Clone- Non Clone	h5b1	7.078	277.373	115.147	891.314	11.422
Ecad MO NO	Non Clone- Non Clone	h5b1	7.078	278.472	106.805	1312.949	11.422
Ecad MO NO	Non Clone- Non Clone	h5b1	7.078	266.807	112.913	1405.387	11.422
Ecad MO NO	Non Clone- Non Clone	h5b1	7.078	222.755	112.461	1005.786	11.422
Ecad MO NO	Non Clone- Non Clone	h5b1	7.078	187.356	108.289	461.584	11.422
Ecad MO NO	Non Clone- Non Clone	h5b1	7.078	175.676	111.764	423.834	11.422
Ecad MO NO	Non Clone- Non Clone
Ecad MO NO	Non Clone- Non Clone	h5b2	9.618	178.252	104.696	409.764	15.551
Ecad MO NO	Non Clone- Non Clone	h5b2	9.618	172.783	100.324	438.595	15.551
Ecad MO NO	Non Clone- Non Clone	h5b2	9.618	167.829	100.812	473.531	15.551
Ecad MO NO	Non Clone- Non Clone	h5b2	9.618	162.306	100.987	493.713	15.551
Ecad MO NO	Non Clone- Non Clone	h5b2	9.618	157.074	99.229	624.842	15.551
Ecad MO NO	Non Clone- Non Clone	h5b2	9.618	150.914	97.793	1181.634	15.551
Ecad MO NO	Non Clone- Non Clone
Ecad MO NO	Non Clone- Non Clone	h5b3	7.403	214.13	112.594	539.548	11.902
Ecad MO NO	Non Clone- Non Clone	h5b3	7.403	214.688	108.863	566.675	11.902
Ecad MO NO	Non Clone- Non Clone	h5b3	7.403	211.515	107.23	454.196	11.902
Ecad MO NO	Non Clone- Non Clone	h5b3	7.403	206.069	114.056	489.259	11.902
Ecad MO NO	Non Clone- Non Clone	h5b3	7.403	199.46	112.571	735.158	11.902
Ecad MO NO	Non Clone- Non Clone	h5b3	7.403	188.5	105.271	803.681	11.902
Ecad MO NO	Non Clone- Non Clone	h5b3	7.403	176.898	101.027	489.457	11.902
Ecad MO NO	Non Clone- Non Clone
Ecad MO NO	Non Clone- Non Clone	h5b4	11.833	414.821	116.096	2634.381	19.153
Ecad MO NO	Non Clone- Non Clone	h5b4	11.833	414.243	109.353	2025.894	19.153
Ecad MO NO	Non Clone- Non Clone	h5b4	11.833	389.368	112.476	1396.754	19.153
Ecad MO NO	Non Clone- Non Clone	h5b4	11.833	351.602	106.581	1572.739	19.153
Ecad MO NO	Non Clone- Non Clone	h5b4	11.833	284.893	102.689	1410.391	19.153
Ecad MO NO	Non Clone- Non Clone	h5b4	11.833	223.597	105.328	745.853	19.153
Ecad MO NO	Non Clone- Non Clone	h5b4	11.833	191.586	104.963	585.483	19.153
Ecad MO NO	Non Clone- Non Clone
Ecad MO NO	Non Clone- Non Clone	h5b5	6.484	428.291	123.264	1210.573	10.455
Ecad MO NO	Non Clone- Non Clone	h5b5	6.484	420.708	134.643	1213.175	10.455
Ecad MO NO	Non Clone- Non Clone	h5b5	6.484	387.401	141.216	1334.4	10.455
Ecad MO NO	Non Clone- Non Clone	h5b5	6.484	370.471	137.984	1064.378	10.455
Ecad MO NO	Non Clone- Non Clone	h5b5	6.484	342.336	127.344	1006.432	10.455
Ecad MO NO	Non Clone- Non Clone	h5b5	6.484	307.694	131.718	955.799	10.455
Ecad MO NO	Non Clone- Non Clone	h5b5	6.484	282.114	101.493	904.888	10.455
Ecad MO NO	Non Clone- Non Clone	h5b5	6.484	258.471	108.486	934.236	10.455
Ecad MO NO	Non Clone- Non Clone
Ecad MO NO	Non Clone- Non Clone	h5b6	7.024	393.966	121.435	1759.69	11.334
Ecad MO NO	Non Clone- Non Clone	h5b6	7.024	330.559	110.096	980.662	11.334
Ecad MO NO	Non Clone- Non Clone	h5b6	7.024	293.08	121.944	978.337	11.334
Ecad MO NO	Non Clone- Non Clone	h5b6	7.024	261.81	119.553	881.516	11.334
Ecad MO NO	Non Clone- Non Clone	h5b6	7.024	235.623	112.306	1005.819	11.334
Ecad MO NO	Non Clone- Non Clone	h5b6	7.024	213.985	108.846	883.861	11.334
Ecad MO NO	Non Clone- Non Clone	h5b6	7.024	189.566	102.381	772.804	11.334
Ecad MO NO	Non Clone- Non Clone
Ecad MO NO	Non Clone- Non Clone	h5b7	9.888	321.762	125.077	1573.447	15.99
Ecad MO NO	Non Clone- Non Clone	h5b7	9.888	317.834	117.912	1703.146	15.99
Ecad MO NO	Non Clone- Non Clone	h5b7	9.888	294.771	114.316	1319.339	15.99
Ecad MO NO	Non Clone- Non Clone	h5b7	9.888	258.256	107.161	1143.089	15.99
Ecad MO NO	Non Clone- Non Clone	h5b7	9.888	212.755	102.558	630.044	15.99
Ecad MO NO	Non Clone- Non Clone	h5b7	9.888	184.218	108.126	505.427	15.99
Ecad MO NO	Non Clone- Non Clone	h5b7	9.888	153.65	102.717	411.838	15.99
Ecad MO CO	Clone- Clone	h3b2	5.511	311.403	154.91	1040.752	8.874
Ecad MO CO	Clone- Clone	h3b2	5.511	278.719	132.882	723.149	8.874
Ecad MO CO	Clone- Clone	h3b2	5.511	267.108	131.6	948.969	8.874
Ecad MO CO	Clone- Clone	h3b2	5.511	249.687	126.296	1165.032	8.874
Ecad MO CO	Clone- Clone
Ecad MO CO	Clone- Clone	h3b3	9.834	328.369	120.986	1600.313	15.902
Ecad MO CO	Clone- Clone	h3b3	9.834	319.058	124.614	2625.086	15.902
Ecad MO CO	Clone- Clone	h3b3	9.834	319.229	108.237	3876.882	15.902
Ecad MO CO	Clone- Clone	h3b3	9.834	277.345	113.978	3895.932	15.902
Ecad MO CO	Clone- Clone	h3b3	9.834	217.141	116.344	1764.978	15.902
Ecad MO CO	Clone- Clone	h3b3	9.834	182.308	109.671	697.824	15.902
Ecad MO CO	Clone- Clone
Ecad MO CO	Clone- Clone	h3b4	7.997	289.216	125.209	777.686	12.915
Ecad MO CO	Clone- Clone	h3b4	7.997	263.771	123.662	1096.694	12.915
Ecad MO CO	Clone- Clone	h3b4	7.997	243.66	110.804	1492.22	12.915
Ecad MO CO	Clone- Clone	h3b4	7.997	229.692	104.775	2238.926	12.915
Ecad MO CO	Clone- Clone	h3b4	7.997	207.802	101.686	1577.318	12.915
Ecad MO CO	Clone- Clone
Ecad MO CO	Clone- Clone	h3b5	8.267	359.903	131.794	1349.341	13.355
Ecad MO CO	Clone- Clone	h3b5	8.267	317.615	130.92	1836.109	13.355
Ecad MO CO	Clone- Clone	h3b5	8.267	264.906	119.359	1113.413	13.355
Ecad MO CO	Clone- Clone	h3b5	8.267	216.201	116.955	694.526	13.355
Ecad MO CO	Clone- Clone
Ecad MO CO	Clone- Clone	h4b1	4.215	588.898	183.532	3716.107	6.762
Ecad MO CO	Clone- Clone	h4b1	4.215	490.958	182.465	1145.934	6.762
Ecad MO CO	Clone- Clone	h4b1	4.215	394.79	168.824	969.027	6.762
Ecad MO CO	Clone- Clone	h4b1	4.215	304.068	132.352	572.367	6.762
Ecad MO CO	Clone- Clone	h4b1	4.215	244.091	128.818	543.198	6.762
Ecad MO CO	Clone- Clone
Ecad MO CO	Clone- Clone	h4b2	3.674	590.978	232.64	4081.588	5.887
Ecad MO CO	Clone- Clone	h4b2	3.674	393.66	190.672	1101.981	5.887
Ecad MO CO	Clone- Clone	h4b2	3.674	294.194	171.866	520.017	5.887
Ecad MO CO	Clone- Clone	h4b2	3.674	227.888	134.298	395.691	5.887
Ecad MO CO	Clone- Clone	h4b2	3.674	186.359	120.85	342.366	5.887
Ecad MO CO	Clone- Clone
Ecad MO CO	Clone- Clone	h4b3	9.186	541.387	134.363	1949.541	14.848
Ecad MO CO	Clone- Clone	h4b3	9.186	468.149	139.448	2590.495	14.848
Ecad MO CO	Clone- Clone	h4b3	9.186	406.44	148.485	2171.642	14.848
Ecad MO CO	Clone- Clone	h4b3	9.186	327.669	130.738	958.046	14.848
Ecad MO CO	Clone- Clone	h4b3	9.186	271.288	129.368	747.26	14.848
Ecad MO CO	Clone- Clone	h4b3	9.186	259.569	113.07	834.559	14.848
Ecad MO CO	Clone- Clone
Ecad MO CO	Clone- Clone	h4b4	6.484	590.727	151.231	4091.101	10.455
Ecad MO CO	Clone- Clone	h4b4	6.484	661.641	176.456	3282.144	10.455
Ecad MO CO	Clone- Clone	h4b4	6.484	569.595	190.302	2496.952	10.455
Ecad MO CO	Clone- Clone	h4b4	6.484	452.202	179.602	1233.751	10.455
Ecad MO CO	Clone- Clone	h4b4	6.484	393.674	153.244	1520.197	10.455
Ecad MO CO	Clone- Clone	h4b4	6.484	350.352	129.327	2161.797	10.455
Ecad MO CO	Clone- Clone
Ecad MO CO	Clone- Clone	h4b5	10.375	576.044	151.813	3562.304	16.781
Ecad MO CO	Clone- Clone	h4b5	10.375	508.55	155.526	3009.641	16.781
Ecad MO CO	Clone- Clone	h4b5	10.375	413.875	138.049	1422.128	16.781
Ecad MO CO	Clone- Clone	h4b5	10.375	336.415	128.391	2205.696	16.781
Ecad MO CO	Clone- Clone	h4b5	10.375	295.939	114.552	3774.136	16.781
Ecad MO CO	Clone- Clone
Ecad MO CO	Clone- Clone	h4b6	5.349	528.113	148.887	3586.203	8.61
Ecad MO CO	Clone- Clone	h4b6	5.349	520.396	201.761	3175.892	8.61
Ecad MO CO	Clone- Clone	h4b6	5.349	483.772	198.91	1497.701	8.61
Ecad MO CO	Clone- Clone	h4b6	5.349	429.958	193.978	1258.799	8.61
Ecad MO CO	Clone- Clone	h4b6	5.349	379.541	174.979	1298.817	8.61
Ecad MO CO	Clone- Clone
Ecad MO CO	Clone- Clone	h4b7	5.187	452.511	136.354	1274.251	8.347
Ecad MO CO	Clone- Clone	h4b7	5.187	425.503	176.756	1166.948	8.347
Ecad MO CO	Clone- Clone	h4b7	5.187	372.011	146.687	1268.97	8.347
Ecad MO CO	Clone- Clone	h4b7	5.187	323.049	137.263	1384.878	8.347
Ecad MO CO	Clone- Clone	h4b7	5.187	269.249	125.562	754.76	8.347
Ecad MO CO	Clone- Clone	h4b7	5.187	217.015	110.176	574.794	8.347
Ecad MO CO	Clone- Clone	h4b7	5.187	186.837	112.183	544.334	8.347
Ecad MO CO	Clone- Clone
Ecad MO CO	Clone- Clone	h4b8	8.267	396.311	168.223	1404.023	13.312
Ecad MO CO	Clone- Clone	h4b8	8.267	371.225	169.976	1521.681	13.312
Ecad MO CO	Clone- Clone	h4b8	8.267	343.328	155.132	1963.344	13.312
Ecad MO CO	Clone- Clone	h4b8	8.267	319.789	131.919	1536.579	13.312
Ecad MO CO	Clone- Clone	h4b8	8.267	286.483	123.447	1339.466	13.312
Ecad MO CO	Clone- Clone	h4b8	8.267	253.123	106.672	1063.558	13.312
Ecad MO CO	Clone- Clone	h4b8	8.267	220.82	104.147	1541.924	13.312
Ecad MO CO	Clone- Clone
Ecad MO CO	Clone- Clone	h4b9	9.618	443.42	164.804	1590.331	15.488
Ecad MO CO	Clone- Clone	h4b9	9.618	395.667	135.495	1234.209	15.488
Ecad MO CO	Clone- Clone	h4b9	9.618	336.831	118.597	1586.576	15.488
Ecad MO CO	Clone- Clone	h4b9	9.618	306.344	110.496	3214.288	15.488
Ecad MO CO	Clone- Clone	h4b9	9.618	293.227	105.105	3612.651	15.488
Ecad MO CO	Clone- Clone	h4b9	9.618	281.366	108.194	2951.776	15.488
Ecad MO CO	Clone- Clone	h4b9	9.618	250.592	98.148	1253.076	15.488
Ecad MO CO	Clone- Clone
Ecad MO CO	Clone- Clone	h4b10	6.106	506.111	134.571	1858.061	9.827
Ecad MO CO	Clone- Clone	h4b10	6.106	452.464	164.207	1687.079	9.827
Ecad MO CO	Clone- Clone	h4b10	6.106	379.257	137.086	1166.922	9.827
Ecad MO CO	Clone- Clone	h4b10	6.106	287.057	128.197	853.303	9.827
Ecad MO CO	Clone- Clone	h4b10	6.106	236.87	123.848	975.06	9.827
Ecad MO CO	Clone- Clone	h4b10	6.106	204.44	115.881	1157.305	9.827
Ecad MO CO	Clone- Clone
Ecad MO CO	Clone- Clone	h4b11	9.402	413.2	170.909	1125.236	15.199
Ecad MO CO	Clone- Clone	h4b11	9.402	397.236	152.44	1449.658	15.199
Ecad MO CO	Clone- Clone	h4b11	9.402	368.521	147.664	1709.833	15.199
Ecad MO CO	Clone- Clone	h4b11	9.402	333.666	132.86	1217.471	15.199
Ecad MO CO	Clone- Clone	h4b11	9.402	281.384	108.041	1073.346	15.199
Ecad MO CO	Clone- Clone	h4b11	9.402	235.274	107.245	830.026	15.199
Ecad MO CO	Clone- Clone	h4b11	9.402	202.771	100.715	679.525	15.199
Ecad MO CO	Clone- Clone	h5b1	9.186	385.479	118.901	4095	14.848
Ecad MO CO	Clone- Clone	h5b1	9.186	385.479	118.901	4095	14.848
Ecad MO CO	Clone- Clone	h5b1	9.186	349.551	128.387	4059.476	14.848
Ecad MO CO	Clone- Clone	h5b1	9.186	245.548	123.905	821.186	14.848
Ecad MO CO	Clone- Clone	h5b1	11.023	322.488	124.212	1394.417	17.835
Ecad MO CO	Clone- Clone	h5b1	11.023	277.048	119.412	1976.089	17.835
Ecad MO CO	Clone- Clone	h5b1	11.023	237.723	118.422	1261.49	17.835
Ecad MO CO	Clone- Clone	h5b1	11.023	200.174	111.529	465.9	17.835
Ecad MO CO	Clone- Clone	h5b1	11.023	185.657	113.579	397.057	17.835
Ecad MO CO	Clone- Clone	h5b1	11.023	179.563	102.072	351.677	17.835
Ecad MO CO	Clone- Clone
Ecad MO CO	Clone- Clone	h5b2	11.509	301.878	103.946	1472.305	18.624
Ecad MO CO	Clone- Clone	h5b2	11.509	317.066	113.037	2487.425	18.624
Ecad MO CO	Clone- Clone	h5b2	10.321	329.433	131.15	2793.404	16.693
Ecad MO CO	Clone- Clone	h5b2	10.321	336.076	116.625	1294.096	16.693
Ecad MO CO	Clone- Clone	h5b2	10.321	320.877	115.493	1407.987	16.693
Ecad MO CO	Clone- Clone	h5b2	10.321	281.17	132.889	1099.692	16.693
Ecad MO CO	Clone- Clone	h5b2	10.321	235.236	118.498	667.32	16.693
Ecad MO CO	Clone- Clone	h5b2	10.321	217.127	120.146	729.3	16.693
Ecad MO CO	Clone- Clone
Ecad MO CO	Clone- Clone	h5b3	11.779	302.747	124.058	1703.376	19.065
Ecad MO CO	Clone- Clone	h5b3	11.779	317.715	128.864	3266.202	19.065
Ecad MO CO	Clone- Clone	h5b3	11.779	306.805	127.161	2903.224	19.065
Ecad MO CO	Clone- Clone	h5b3	11.779	281.166	116.718	1531.764	19.065
Ecad MO CO	Clone- Clone	h5b3	11.779	228.847	115.482	927.582	19.065
Ecad MO CO	Clone- Clone	h5b3	11.779	203.691	114.794	686.84	19.065
Ecad MO CO	Clone- Clone	h5b3	11.779	192.543	107.108	811.09	19.065
Ecad MO CO	Clone- Clone
Ecad MO CO	Clone- Clone	h6b1	12.32	230.502	94.675	1268.417	19.944
Ecad MO CO	Clone- Clone	h6b1	12.32	232.347	102.283	934.662	19.944
Ecad MO CO	Clone- Clone	h6b1	12.32	214.467	101.721	933.166	19.944
Ecad MO CO	Clone- Clone	h6b1	12.32	176.846	104.191	846.088	19.944
Ecad MO CO	Clone- Clone	h6b1	12.32	152.911	101.942	414.712	19.944
Ecad MO CO	Clone- Clone	h6b1	12.32	139.061	98.602	291.213	19.944
Ecad MO CO	Clone- Clone
Ecad MO CO	Clone- Clone	h6b2	10.537	212.534	105.016	2122.092	17.045
Ecad MO CO	Clone- Clone	h6b2	10.537	234.458	101.555	2727.979	17.045
Ecad MO CO	Clone- Clone	h6b2	10.537	225.614	105.4	2738.242	17.045
Ecad MO CO	Clone- Clone	h6b2	10.537	197.428	97.082	630.31	17.045
Ecad MO CO	Clone- Clone	h6b2	10.537	189.264	98.604	846.082	17.045
Ecad MO CO	Clone- Clone	h6b2	10.537	180.597	101.263	1152.607	17.045
Ecad MO CO	Clone- Clone	h6b2	10.537	166.954	100.082	717.071	17.045
Ecad MO CO	Clone- Clone
Ecad MO CO	Clone- Clone	h6b3	12.104	180.377	98.462	1265.939	19.592
Ecad MO CO	Clone- Clone	h6b3	12.104	204.001	102.132	1930.206	19.592
Ecad MO CO	Clone- Clone	h6b3	12.104	203.921	103.908	1428.47	19.592
Ecad MO CO	Clone- Clone	h6b3	12.104	196.083	102.627	1442.004	19.592
Ecad MO CO	Clone- Clone	h6b3	12.104	193.633	107.902	765.587	19.592
Ecad MO CO	Clone- Clone	h6b3	12.104	191.314	109.355	1143.271	19.592
Ecad MO CO	Clone- Clone	h7b1	7.997	325.054	134.059	795.28	12.915
Ecad MO CO	Clone- Clone	h7b1	7.997	249.82	130.675	488.701	12.915
Ecad MO CO	Clone- Clone	h7b1	7.997	219.737	130.478	464.158	12.915
Ecad MO CO	Clone- Clone	h7b1	7.997	195.934	116.732	381.74	12.915
Ecad MO CO	Clone- Clone	h7b1	7.997	171.629	110.448	304.057	12.915
Ecad MO CO	Clone- Clone	h7b1	7.997	158.837	107.306	308.14	12.915
Ecad MO CO	Clone- Clone
Ecad MO CO	Clone- Clone	h7b2	8.267	520.779	162.983	2436.309	13.354
Ecad MO CO	Clone- Clone	h7b2	8.267	510.744	147.659	4002.668	13.354
Ecad MO CO	Clone- Clone	h7b2	8.267	459.895	141.368	4089.669	13.354
Ecad MO CO	Clone- Clone	h7b2	8.267	373.953	130.92	2520.98	13.354
Ecad MO CO	Clone- Clone	h7b2	8.267	328.059	116.257	2572.532	13.354
Ecad MO CO	Clone- Clone	h7b2	8.267	288.295	112.657	2943.248	13.354
Ecad MO CO	Clone- Clone	h7b2	8.267	248.347	113.653	2812.659	13.354
Ecad MO CO	Clone- Clone
Ecad MO CO	Clone- Clone	h7b3	7.024	580.692	180.515	3557.235	11.334
Ecad MO CO	Clone- Clone	h7b3	7.024	525.351	189.2	1983.341	11.334
Ecad MO CO	Clone- Clone	h7b3	7.024	466.227	188.584	2260.431	11.334
Ecad MO CO	Clone- Clone	h7b3	7.024	434.732	155.266	2403.198	11.334
Ecad MO CO	Clone- Clone	h7b3	7.024	387.389	153.559	1831.783	11.334
Ecad MO CO	Clone- Clone	h7b3	7.024	340.713	155.463	1779.79	11.334
Ecad MO CO	Clone- Clone	h7b3	7.024	303.534	133.285	751.954	11.334
Ecad MO CO	Clone- Clone
Ecad MO CO	Clone- Clone	h7b4	5.998	431.249	166.92	2175.941	9.664
Ecad MO CO	Clone- Clone	h7b4	5.998	421.813	148.779	1917.35	9.664
Ecad MO CO	Clone- Clone	h7b4	5.998	394.141	171.363	1787.87	9.664
Ecad MO CO	Clone- Clone	h7b4	5.998	354.867	161.253	1064.398	9.664
Ecad MO CO	Clone- Clone	h7b4	5.998	307.865	146.221	801.136	9.664
Ecad MO CO	Clone- Clone	h7b4	5.998	266.177	126.151	775.425	9.664
Ecad MO CO	Clone- Clone	h7b4	5.998	231.115	122.104	596.876	9.664
Ecad MO CO	Clone- Clone	h7b4	5.998	211.598	119.678	558.04	9.664
Ecad MO CO	Clone- Clone	h8b1	6.646	275.867	134.716	774.914	10.719
Ecad MO CO	Clone- Clone	h8b1	6.646	242.868	135.191	603.885	10.719
Ecad MO CO	Clone- Clone	h8b1	6.646	227.99	107.444	585.058	10.719
Ecad MO CO	Clone- Clone	h8b1	6.646	214.937	110.916	565.616	10.719
Ecad MO CO	Clone- Clone	h8b1	6.646	197.37	109.344	441.654	10.719
Ecad MO CO	Clone- Clone	h8b1	6.646	169.109	105.348	373.323	10.719
Ecad MO CO	Clone- Clone
Ecad MO CO	Clone- Clone	h8b2	5.728	243.583	102.271	695.271	9.225
Ecad MO CO	Clone- Clone	h8b2	5.728	225.658	111.392	487.67	9.225
Ecad MO CO	Clone- Clone	h8b2	5.728	185.321	114.907	477.751	9.225
Ecad MO CO	Clone- Clone	h8b2	5.728	161.323	103.588	278.694	9.225
Ecad MO CO	Clone- Clone	h8b2	5.728	145.119	100.469	248.428	9.225
Ecad MO CO	Clone- Clone
Ecad MO CO	Clone- Clone	h8b3	5.403	304.734	116.833	4091.456	8.698
Ecad MO CO	Clone- Clone	h8b3	5.403	242.446	113.791	1220.98	8.698
Ecad MO CO	Clone- Clone	h8b3	5.403	200.606	102.878	841.317	8.698
Ecad MO CO	Clone- Clone	h8b3	5.403	169.932	95.997	406.653	8.698
Ecad MO CO	Clone- Clone	h8b3	5.403	155.414	104.277	348.403	8.698
Ecad MO CO	Clone- Clone
Ecad MO CO	Clone- Clone	h8b4	6.646	209.195	105.319	700.497	10.719
Ecad MO CO	Clone- Clone	h8b4	6.646	203.506	110.629	655.804	10.719
Ecad MO CO	Clone- Clone	h8b4	6.646	193.631	105.789	583.985	10.719
Ecad MO CO	Clone- Clone	h8b4	6.646	175.716	104.344	591.224	10.719
Ecad MO CO	Clone- Clone	h8b4	6.646	165.373	99.942	1044.42	10.719
Ecad MO CO	Clone- Clone
Ecad MO CO	Clone- Clone	h8b5	9.564	237.719	119.621	733.13	15.463
Ecad MO CO	Clone- Clone	h8b5	9.564	210.514	111.161	498.06	15.463
Ecad MO CO	Clone- Clone	h8b5	9.564	204.819	103.58	647.46	15.463
Ecad MO CO	Clone- Clone	h8b5	9.564	206.186	97.684	706.949	15.463
Ecad MO CO	Clone- Clone	h8b5	9.564	196.203	100.027	596.851	15.463
Ecad MO CO	Clone- Clone
Ecad MO CO	Clone- Clone	h8b6	6.538	290.589	123.249	1013.604	10.543
Ecad MO CO	Clone- Clone	h8b6	6.538	262.704	123.525	640.44	10.543
Ecad MO CO	Clone- Clone	h8b6	6.538	222.744	117.463	726.727	10.543
Ecad MO CO	Clone- Clone	h8b6	6.538	200.054	114.721	500.22	10.543
Ecad MO CO	Clone- Clone	h8b6	6.538	180.583	107.269	340.125	10.543
Ecad MO CO	Clone- Clone
Ecad MO CO	Clone- Clone	h8b7	10.645	377.687	139.287	1439.204	17.22
Ecad MO CO	Clone- Clone	h8b7	10.645	363.228	139.644	1438.658	17.22
Ecad MO CO	Clone- Clone	h8b7	10.645	276.517	114.839	770.886	17.22
Ecad MO CO	Clone- Clone	h8b7	10.645	195.448	110.246	357.962	17.22
Ecad MO CO	Clone- Clone	h8b7	10.645	169.358	107.244	333.656	17.22
Ecad MO PO	Non Clone- Clone	h1b1	12.104	476.266	110.441	3969.673	19.593
Ecad MO PO	Non Clone- Clone	h1b1	12.158	465.132	109.754	2082.216	19.68
Ecad MO PO	Non Clone- Clone	h1b1	12.158	392.835	105.756	1444.804	19.68
Ecad MO PO	Non Clone- Clone	h1b1	12.158	317.562	99.049	1287.156	19.68
Ecad MO PO	Non Clone- Clone	h1b1	12.158	245.269	102.821	1199.11	19.68
Ecad MO PO	Non Clone- Clone	h1b1	12.158	204.149	100.525	766.989	19.68
Ecad MO PO	Non Clone- Clone	h1b1	12.158	183.016	104.138	657.198	19.68
Ecad MO PO	Non Clone- Clone
Ecad MO PO	Non Clone- Clone	h1b2	8.97	463.723	137.918	1955.135	14.497
Ecad MO PO	Non Clone- Clone	h1b2	8.97	484.003	141.52	2536.046	14.497
Ecad MO PO	Non Clone- Clone	h1b2	8.97	425.622	160.76	2640.093	14.497
Ecad MO PO	Non Clone- Clone	h1b2	8.97	367.066	146.604	1776.357	14.497
Ecad MO PO	Non Clone- Clone	h1b2	8.97	280.627	128.619	809.112	14.497
Ecad MO PO	Non Clone- Clone
Ecad MO PO	Non Clone- Clone	h1b3	16.48	448.623	112.001	2110.59	26.709
Ecad MO PO	Non Clone- Clone	h1b3	16.48	423.417	118.917	1668.646	26.709
Ecad MO PO	Non Clone- Clone	h1b3	16.48	380.36	111.406	1358.577	26.709
Ecad MO PO	Non Clone- Clone	h1b3	18.318	427.837	142.507	3357.801	29.696
Ecad MO PO	Non Clone- Clone	h1b3	18.318	412.609	122.63	3021.832	29.696
Ecad MO PO	Non Clone- Clone	h1b3	18.318	374.222	120.815	1567.797	29.696
Ecad MO PO	Non Clone- Clone	h1b3	18.318	328.827	114.853	1751.134	29.696
Ecad MO PO	Non Clone- Clone	h1b3	18.318	289.783	105.758	1993.77	29.696
Ecad MO PO	Non Clone- Clone
Ecad MO PO	Non Clone- Clone	h1b4	13.995	452.396	136.878	2969.585	22.668
Ecad MO PO	Non Clone- Clone	h1b4	13.995	461.211	100.431	2153.09	22.668
Ecad MO PO	Non Clone- Clone	h1b4	13.995	454.075	120.209	2500.67	22.668
Ecad MO PO	Non Clone- Clone	h1b4	13.995	429.954	113.782	4045.44	22.668
Ecad MO PO	Non Clone- Clone	h1b4	13.995	382.783	101.651	4095	22.668
Ecad MO PO	Non Clone- Clone	h1b4	13.995	310.004	94.294	3751.957	22.668
Ecad MO PO	Non Clone- Clone	h1b4	13.995	246.044	97.382	1247.848	22.668
Ecad MO PO	Non Clone- Clone
Ecad MO PO	Non Clone- Clone	h1b5	8.916	364.571	116.787	1624.141	14.409
Ecad MO PO	Non Clone- Clone	h1b5	8.916	384.333	110.96	2256.178	14.409
Ecad MO PO	Non Clone- Clone	h1b5	8.916	401.1	134.003	2503.224	14.409
Ecad MO PO	Non Clone- Clone	h1b5	8.916	375.628	125.347	1313.717	14.409
Ecad MO PO	Non Clone- Clone	h1b5	8.916	337.342	131.84	1282.242	14.409
Ecad MO PO	Non Clone- Clone	h1b5	8.916	311.701	124.436	1257.709	14.409
Ecad MO PO	Non Clone- Clone	h1b5	8.916	279.69	116.145	1213.775	14.409
Ecad MO PO	Non Clone- Clone
Ecad MO PO	Non Clone- Clone
Ecad MO PO	Non Clone- Clone	h2b1	6.97	330.407	109.737	4095	11.246
Ecad MO PO	Non Clone- Clone	h2b1	6.97	341.495	120.822	3331.917	11.246
Ecad MO PO	Non Clone- Clone	h2b1	6.97	291.867	114.368	930.451	11.246
Ecad MO PO	Non Clone- Clone	h2b1	6.97	238.709	123.879	631.19	11.246
Ecad MO PO	Non Clone- Clone	h2b1	6.97	199.347	110.003	644.718	11.246
Ecad MO PO	Non Clone- Clone
Ecad MO PO	Non Clone- Clone	h2b2	11.779	426.957	120.478	2277.968	19.06
Ecad MO PO	Non Clone- Clone	h2b2	11.779	406.699	150.098	1060.113	19.06
Ecad MO PO	Non Clone- Clone	h2b2	11.779	351.008	148.787	813.245	19.06
Ecad MO PO	Non Clone- Clone	h2b2	11.779	309.416	118.035	911.713	19.06
Ecad MO PO	Non Clone- Clone	h2b2	11.779	291.676	128.35	1038.248	19.06
Ecad MO PO	Non Clone- Clone	h2b2	11.779	289.143	121.902	1179.733	19.06
Ecad MO PO	Non Clone- Clone
Ecad MO PO	Non Clone- Clone	h2b3	6.16	390.689	128.002	1314.99	9.928
Ecad MO PO	Non Clone- Clone	h2b3	6.16	391.895	124.994	1686.53	9.928
Ecad MO PO	Non Clone- Clone	h2b3	6.16	379.872	138.968	1807.912	9.928
Ecad MO PO	Non Clone- Clone	h2b3	6.16	351.624	127.989	2786.094	9.928
Ecad MO PO	Non Clone- Clone	h2b3	6.16	313.841	129.033	2199.95	9.928
Ecad MO PO	Non Clone- Clone	h2b3	6.16	285.199	120.978	1147.871	9.928
Ecad MO PO	Non Clone- Clone
Ecad MO PO	Non Clone- Clone	h2b4	9.564	359.212	125.645	1953.7	15.463
Ecad MO PO	Non Clone- Clone	h2b4	9.564	281.269	121.083	968.996	15.463
Ecad MO PO	Non Clone- Clone	h2b4	9.564	249.512	119.349	1867.048	15.463
Ecad MO PO	Non Clone- Clone	h2b4	9.564	238.403	112.036	3287.606	15.463
Ecad MO PO	Non Clone- Clone
Ecad MO PO	Non Clone- Clone	h2b5	10.321	341.738	126.576	1752.14	16.693
Ecad MO PO	Non Clone- Clone	h2b5	10.321	297.574	123.37	945.49	16.693
Ecad MO PO	Non Clone- Clone	h2b5	10.321	234.248	119.37	486.411	16.693
Ecad MO PO	Non Clone- Clone	h2b5	10.321	208.877	119.652	512.673	16.693
Ecad MO PO	Non Clone- Clone	h2b5	10.321	191.281	105.714	431.324	16.693
Ecad MO PO	Non Clone- Clone
Ecad MO PO	Non Clone- Clone	h2b6	6.43	304.877	113.604	1246.945	10.367
Ecad MO PO	Non Clone- Clone	h2b6	6.43	326.339	113.591	1583.739	10.367
Ecad MO PO	Non Clone- Clone	h2b6	6.43	288.649	131.546	1129.499	10.367
Ecad MO PO	Non Clone- Clone	h2b6	6.43	231.008	128.541	1055.754	10.367
Ecad MO PO	Non Clone- Clone	h2b6	6.43	210.646	114.149	2534.123	10.367
Ecad MO PO	Non Clone- Clone	h3b1	12.428	338.105	123.657	1722.284	20.12
Ecad MO PO	Non Clone- Clone	h3b1	12.428	296.447	132.475	1012.536	20.12
Ecad MO PO	Non Clone- Clone	h3b1	12.428	248.813	126.588	520.638	20.12
Ecad MO PO	Non Clone- Clone	h3b1	12.428	216.286	108.539	858.319	20.12
Ecad MO PO	Non Clone- Clone	h3b1	12.428	203.701	109.037	1239.605	20.12
Ecad MO PO	Non Clone- Clone
Ecad MO PO	Non Clone- Clone	h3b2	6.7	416.753	151.779	2033.731	10.807
Ecad MO PO	Non Clone- Clone	h3b2	6.7	402.611	170.041	1604.438	10.807
Ecad MO PO	Non Clone- Clone	h3b2	6.7	365.697	162.486	1749.62	10.807
Ecad MO PO	Non Clone- Clone	h3b2	6.7	354.556	143.437	2313.031	10.807
Ecad MO PO	Non Clone- Clone
Ecad MO PO	Non Clone- Clone	h3b3	9.672	291.931	105.194	1295.62	15.639
Ecad MO PO	Non Clone- Clone	h3b3	9.672	265.299	110.552	815.866	15.639
Ecad MO PO	Non Clone- Clone	h3b3	9.672	234.317	107.902	995.655	15.639
Ecad MO PO	Non Clone- Clone	h3b3	9.672	219.332	106.116	965.238	15.639
Ecad MO PO	Non Clone- Clone	h3b3	9.672	209.612	102.441	767.292	15.639
Ecad MO PO	Non Clone- Clone
Ecad MO PO	Non Clone- Clone	h3b4	13.4	449.82	114.439	3171.964	21.701
Ecad MO PO	Non Clone- Clone	h3b4	13.4	403.702	118.734	3062.834	21.701
Ecad MO PO	Non Clone- Clone	h3b4	13.4	315.366	117.538	1531.018	21.701
Ecad MO PO	Non Clone- Clone	h3b4	13.4	242.873	111.196	921.447	21.701
Ecad MO PO	Non Clone- Clone	h3b4	13.4	187.538	104.22	514.281	21.701
Ecad MO PO	Non Clone- Clone
Ecad MO PO	Non Clone- Clone	h3b5	15.292	441.524	123.386	1534.468	24.776
Ecad MO PO	Non Clone- Clone	h3b5	15.292	383.11	139.699	1411.903	24.776
Ecad MO PO	Non Clone- Clone	h3b5	15.292	310.462	131.794	1133.152	24.776
Ecad MO PO	Non Clone- Clone	h3b5	15.292	264.063	118.973	1092.046	24.776
Ecad MO PO	Non Clone- Clone	h3b5	15.292	232.155	120.085	1036.934	24.776
Ecad MO PO	Non Clone- Clone	h4b1	9.456	642.652	189.959	3161.564	15.287
Ecad MO PO	Non Clone- Clone	h4b1	9.456	601.929	200.069	2750.754	15.287
Ecad MO PO	Non Clone- Clone	h4b1	9.456	508.684	207.594	1759.148	15.287
Ecad MO PO	Non Clone- Clone	h4b1	9.456	377.549	148.822	964.627	15.287
Ecad MO PO	Non Clone- Clone	h4b1	9.456	294.898	144.65	684.809	15.287
Ecad MO PO	Non Clone- Clone	h4b1	9.456	242.785	122.419	515.766	15.287
Ecad MO PO	Non Clone- Clone
Ecad MO PO	Non Clone- Clone	h4b2	8.591	568.192	149.6	2380.066	13.881
Ecad MO PO	Non Clone- Clone	h4b2	8.591	492.793	156.036	1758.865	13.881
Ecad MO PO	Non Clone- Clone	h4b2	8.591	394.566	140.495	1511.083	13.881
Ecad MO PO	Non Clone- Clone	h4b2	8.591	303.74	142.687	1662.621	13.881
Ecad MO PO	Non Clone- Clone	h4b2	8.591	229.79	117.364	1120.158	13.881
Ecad MO PO	Non Clone- Clone	h4b2	8.591	189.411	111.448	579.058	13.881
Ecad MO PO	Non Clone- Clone
Ecad MO PO	Non Clone- Clone	h4b3	7.997	503.928	140.152	1676.673	12.915
Ecad MO PO	Non Clone- Clone	h4b3	7.997	473.047	151.105	1491.529	12.915
Ecad MO PO	Non Clone- Clone	h4b3	7.997	408.558	134.827	1526.303	12.915
Ecad MO PO	Non Clone- Clone	h4b3	7.997	325.281	168.341	1036.049	12.915
Ecad MO PO	Non Clone- Clone	h4b3	7.997	258.673	134.525	613.01	12.915
Ecad MO PO	Non Clone- Clone	h4b3	7.997	222.667	119.639	762.729	12.915
Ecad MO PO	Non Clone- Clone
Ecad MO PO	Non Clone- Clone	h4b4	6.43	706.599	187.196	3518.084	10.367
Ecad MO PO	Non Clone- Clone	h4b4	6.43	736.73	194.196	2934.082	10.367
Ecad MO PO	Non Clone- Clone	h4b4	6.43	641.421	196.026	1658.363	10.367
Ecad MO PO	Non Clone- Clone	h4b4	6.43	516.771	198.228	1149.322	10.367
Ecad MO PO	Non Clone- Clone	h4b4	6.43	391.261	169.279	856.767	10.367
Ecad MO PO	Non Clone- Clone	h4b4	6.43	301.781	138.726	587.901	10.367
Ecad MO PO	Non Clone- Clone
Ecad MO PO	Non Clone- Clone	h4b5	7.619	856.929	280.626	3648.744	12.3
Ecad MO PO	Non Clone- Clone	h4b5	7.619	820.968	294.985	3534.698	12.3
Ecad MO PO	Non Clone- Clone	h4b5	7.619	752.394	307.139	3322.983	12.3
Ecad MO PO	Non Clone- Clone	h4b5	7.619	647.11	229.301	4018.058	12.3
Ecad MO PO	Non Clone- Clone	h4b5	7.619	515.189	149.447	3730.509	12.3
Ecad MO PO	Non Clone- Clone	h4b5	7.619	383.24	122.617	1407.364	12.3
Ecad MO PO	Non Clone- Clone
Ecad MO PO	Non Clone- Clone	h4b6	8.375	573.601	131.727	4095	13.53
Ecad MO PO	Non Clone- Clone	h4b6	8.375	505.207	144.221	3495.058	13.53
Ecad MO PO	Non Clone- Clone	h4b6	8.375	413.265	142.333	3261.617	13.53
Ecad MO PO	Non Clone- Clone	h4b6	8.375	322.563	150.865	2767.992	13.53
Ecad MO PO	Non Clone- Clone	h4b6	8.375	243.095	118.689	965.273	13.53
Ecad MO PO	Non Clone- Clone
Ecad MO PO	Non Clone- Clone	h4b7	4.485	795.128	181.864	4055.021	7.204
Ecad MO PO	Non Clone- Clone	h4b7	4.485	696.378	163.727	2201.368	7.204
Ecad MO PO	Non Clone- Clone	h4b7	4.485	586.438	171.532	1476.909	7.204
Ecad MO PO	Non Clone- Clone	h4b7	4.485	493.986	177.391	1302.268	7.204
Ecad MO PO	Non Clone- Clone	h4b7	4.485	389.546	159.889	846.846	7.204
Ecad MO PO	Non Clone- Clone	h5b4	10.375	531.656	164.295	2366.608	16.781
Ecad MO PO	Non Clone- Clone	h5b4	10.375	550.287	178.56	3058.218	16.781
Ecad MO PO	Non Clone- Clone	h5b4	10.375	533.454	168.605	2903.836	16.781
Ecad MO PO	Non Clone- Clone	h5b4	10.375	449.491	162.903	1899.572	16.781
Ecad MO PO	Non Clone- Clone	h5b4	10.375	354.291	150.801	1563.787	16.781
Ecad MO PO	Non Clone- Clone	h5b4	10.375	270.403	116.173	766.719	16.781
Ecad MO PO	Non Clone- Clone	h5b4	10.375	217.507	110.876	660.158	16.781
Ecad MO PO	Non Clone- Clone	h5b4	10.375	200.179	108.918	612.101	16.781
Ecad MO PO	Non Clone- Clone
Ecad MO PO	Non Clone- Clone	h5b5	9.024	364.186	124.046	1341.444	14.584
Ecad MO PO	Non Clone- Clone	h5b5	9.024	314.861	142.83	1479.205	14.584
Ecad MO PO	Non Clone- Clone	h5b5	9.024	274.028	135.605	861.31	14.584
Ecad MO PO	Non Clone- Clone	h5b5	9.024	260.726	121.268	582.904	14.584
Ecad MO PO	Non Clone- Clone	h5b5	9.024	271.067	118.273	927.589	14.584
Ecad MO PO	Non Clone- Clone
Ecad MO PO	Non Clone- Clone	h5b6	7.727	344.315	130.226	2205.922	12.475
Ecad MO PO	Non Clone- Clone	h5b6	7.727	324.823	129.895	1801.621	12.475
Ecad MO PO	Non Clone- Clone	h5b6	7.727	303.122	132.441	1684.226	12.475
Ecad MO PO	Non Clone- Clone	h5b6	7.727	262.443	120.844	636.846	12.475
Ecad MO PO	Non Clone- Clone	h5b6	7.727	215.787	117.744	571.553	12.475
Ecad MO PO	Non Clone- Clone
Ecad MO PO	Non Clone- Clone	h5b7	9.564	484.449	168.608	3864.605	15.463
Ecad MO PO	Non Clone- Clone	h5b7	9.564	432.124	176.86	4028.397	15.463
Ecad MO PO	Non Clone- Clone	h5b7	9.564	354.066	157.906	2115.612	15.463
Ecad MO PO	Non Clone- Clone	h5b7	9.564	276.839	129.38	738.101	15.463
Ecad MO PO	Non Clone- Clone	h5b7	9.564	233.907	126.12	593.264	15.463
Ecad MO PO	Non Clone- Clone	h5b7	9.564	225.645	119.711	694.974	15.463
Ecad MO PO	Non Clone- Clone
Ecad MO PO	Non Clone- Clone	h5b8	10.429	521.82	120.986	3654.187	16.869
Ecad MO PO	Non Clone- Clone	h5b8	10.429	452.27	113.758	1724.404	16.869
Ecad MO PO	Non Clone- Clone	h5b8	10.429	357.087	107.424	1328.011	16.869
Ecad MO PO	Non Clone- Clone	h5b8	10.429	292.104	104.529	1943.162	16.869
Ecad MO PO	Non Clone- Clone	h5b8	10.429	262.399	101.931	2289.888	16.869
Ecad MO PO	Non Clone- Clone	h5b8	10.429	238.405	102.058	1037.054	16.869
Ecad MO PO	Non Clone- Clone
Ecad MO PO	Non Clone- Clone	h5b9	9.564	527.523	137.489	2954.299	15.463
Ecad MO PO	Non Clone- Clone	h5b9	9.564	576.135	126.617	2447.322	15.463
Ecad MO PO	Non Clone- Clone	h5b9	9.564	566.335	154.844	1370.387	15.463
Ecad MO PO	Non Clone- Clone	h5b9	9.564	512.008	158.209	1261.471	15.463
Ecad MO PO	Non Clone- Clone	h5b9	9.564	456.407	166.681	1060.843	15.463
Ecad MO PO	Non Clone- Clone	h5b9	9.564	412.187	136.436	934.498	15.463
Ecad MO PO	Non Clone- Clone	h5b9	9.564	356.186	141.669	725.164	15.463
Ecad MO PO	Non Clone- Clone	h5b9	9.564	315.54	139.988	621.469	15.463
Ecad MO PO	Non Clone- Clone
Ecad MO PO	Non Clone- Clone	h5b10	11.725	452.809	125.864	2510.183	18.977
Ecad MO PO	Non Clone- Clone	h5b10	11.725	383.775	144.858	1771.997	18.977
Ecad MO PO	Non Clone- Clone	h5b10	11.725	314.854	125.81	1625.531	18.977
Ecad MO PO	Non Clone- Clone	h5b10	11.725	259.414	128.716	622.726	18.977
Ecad MO PO	Non Clone- Clone	h5b10	11.725	223.691	108.876	635.599	18.977
Ecad MO PO	Non Clone- Clone	h5b10	11.725	211.321	117.492	680.768	18.977
Ecad MO PO	Non Clone- Clone
Ecad MO PO	Non Clone- Clone	h5b11	10.158	516.975	140.845	2696.218	16.429
Ecad MO PO	Non Clone- Clone	h5b11	10.158	456.65	159.742	1923.195	16.429
Ecad MO PO	Non Clone- Clone	h5b11	10.158	379.18	141.129	1557.125	16.429
Ecad MO PO	Non Clone- Clone	h5b11	10.158	352.977	133.739	1687.606	16.429
Ecad MO PO	Non Clone- Clone	h5b11	10.158	347.188	132.729	1657.345	16.429
Ecad MO PO	Non Clone- Clone	h5b11	10.158	321.839	115.351	1939.252	16.429
Ecad MO PO	Non Clone- Clone
Ecad MO PO	Non Clone- Clone	h5b12	7.835	611.808	187.975	2319.828	12.652
Ecad MO PO	Non Clone- Clone	h5b12	7.835	636.961	206.644	2829.8	12.652
Ecad MO PO	Non Clone- Clone	h5b12	7.835	619.18	229.829	2163.731	12.652
Ecad MO PO	Non Clone- Clone	h5b12	7.835	479.585	186.661	1060.507	12.652
Ecad MO PO	Non Clone- Clone	h5b12	7.835	310.652	159.828	584.122	12.652
Ecad MO PO	Non Clone- Clone	h5b12	7.835	251.924	136.174	670.14	12.652
Ecad MO PO	Non Clone- Clone	h6b1	3.62	343.257	145.777	1422.222	5.799
Ecad MO PO	Non Clone- Clone	h6b1	3.62	334.075	145.262	975.957	5.799
Ecad MO PO	Non Clone- Clone	h6b1	3.62	290.241	151.314	597.102	5.799
Ecad MO PO	Non Clone- Clone	h6b1	3.62	238.826	134.662	468.631	5.799
Ecad MO PO	Non Clone- Clone	h6b1	3.62	220.235	135.199	533.176	5.799
Ecad MO PO	Non Clone- Clone	h6b1	3.62	217.422	124.696	763.422	5.799
Ecad MO PO	Non Clone- Clone
Ecad MO PO	Non Clone- Clone	h6b2	9.132	383.587	131.876	1459.987	14.76
Ecad MO PO	Non Clone- Clone	h6b2	9.132	335.303	150.173	1052.57	14.76
Ecad MO PO	Non Clone- Clone	h6b2	9.132	272.722	139.154	698.431	14.76
Ecad MO PO	Non Clone- Clone	h6b2	9.132	234.982	123.225	449.769	14.76
Ecad MO PO	Non Clone- Clone	h6b2	9.132	227.833	120.087	728.015	14.76
Ecad MO PO	Non Clone- Clone
Ecad MO PO	Non Clone- Clone	h6b3	7.889	340.275	110.82	1580.459	12.74
Ecad MO PO	Non Clone- Clone	h6b3	7.889	291.458	121.792	1009.171	12.74
Ecad MO PO	Non Clone- Clone	h6b3	7.889	231.661	108.374	669.091	12.74
Ecad MO PO	Non Clone- Clone	h6b3	7.889	186.927	105.367	359.912	12.74
Ecad MO PO	Non Clone- Clone	h6b3	7.889	173.651	103.358	410.224	12.74
Ecad MO PO	Non Clone- Clone
Ecad MO PO	Non Clone- Clone	h6b4	8.97	276.939	128.254	1423.499	14.497
Ecad MO PO	Non Clone- Clone	h6b4	8.97	250.156	109.735	974.574	14.497
Ecad MO PO	Non Clone- Clone	h6b4	8.97	218.126	107.537	1167.08	14.497
Ecad MO PO	Non Clone- Clone	h6b4	8.97	183.359	104.477	843.773	14.497
Ecad MO PO	Non Clone- Clone	h6b4	8.97	164.427	104.891	625.849	14.497
Ecad MO PO	Non Clone- Clone
Ecad MO PO	Non Clone- Clone	h6b5	7.133	339.629	115.266	3636.868	11.509
Ecad MO PO	Non Clone- Clone	h6b5	7.133	308.662	127.627	1309.322	11.509
Ecad MO PO	Non Clone- Clone	h6b5	7.133	247	119.083	757.83	11.509
Ecad MO PO	Non Clone- Clone	h6b5	7.133	209.926	113.757	513.393	11.509
Ecad MO PO	Non Clone- Clone	h6b5	7.133	190.669	101.62	710.516	11.509
Ecad MO PO	Non Clone- Clone
Ecad MO PO	Non Clone- Clone	h6b6	5.998	247.615	122.532	601.768	9.664
Ecad MO PO	Non Clone- Clone	h6b6	5.998	224.803	120.774	484.909	9.664
Ecad MO PO	Non Clone- Clone	h6b6	5.998	195.223	110.907	465.617	9.664
Ecad MO PO	Non Clone- Clone	h6b6	5.998	165.387	103.878	416.59	9.664
Ecad MO PO	Non Clone- Clone	h6b6	5.998	142.259	102.255	390.209	9.664
Ecad MO PO	Non Clone- Clone	h6b6	5.998	129.535	99.475	216.876	9.664
Ecad MO PO	Non Clone- Clone
Ecad MO PO	Non Clone- Clone	h6b7	6.322	327.087	106.442	1397.266	10.192
Ecad MO PO	Non Clone- Clone	h6b7	6.322	282.874	113.542	1407.602	10.192
Ecad MO PO	Non Clone- Clone	h6b7	6.322	227.313	114.143	1341.483	10.192
Ecad MO PO	Non Clone- Clone	h6b7	6.322	198.225	109.249	1513.182	10.192
Ecad MO PO	Non Clone- Clone	h6b7	6.322	166.726	104.127	576.232	10.192
Ecad MO PO	Non Clone- Clone
Ecad MO PO	Non Clone- Clone	h6b8	5.511	390.245	109.819	1605.799	8.874
Ecad MO PO	Non Clone- Clone	h6b8	5.511	351.046	122.029	1927.233	8.874
Ecad MO PO	Non Clone- Clone	h6b8	5.511	281.377	121.28	1009.026	8.874
Ecad MO PO	Non Clone- Clone	h6b8	5.511	221.734	122.118	841.99	8.874
Ecad MO PO	Non Clone- Clone	h6b8	5.511	190.868	115.217	418.902	8.874
Ecad MO PO	Non Clone- Clone	h7b1	12.05	554.877	171.969	1906.343	19.504
Ecad MO PO	Non Clone- Clone	h7b1	12.05	476.677	154.734	1789.302	19.504
Ecad MO PO	Non Clone- Clone	h7b1	12.05	388.395	143.888	1415.271	19.504
Ecad MO PO	Non Clone- Clone	h7b1	12.05	317.273	129.312	873.144	19.504
Ecad MO PO	Non Clone- Clone	h7b1	12.05	279.386	123.229	568.37	19.504
Ecad MO PO	Non Clone- Clone	h7b1	12.05	248.652	135.081	453.089	19.504
Ecad MO PO	Non Clone- Clone	h7b1	12.05	210.605	119.621	425.697	19.504
Ecad MO PO	Non Clone- Clone
Ecad MO PO	Non Clone- Clone	h7b2	8.97	464.63	149.157	2215.049	14.497
Ecad MO PO	Non Clone- Clone	h7b2	8.97	458.265	188.941	2727.529	14.497
Ecad MO PO	Non Clone- Clone	h7b2	8.97	456.051	175.402	1963.874	14.497
Ecad MO PO	Non Clone- Clone	h7b2	8.97	435.696	136.064	1950.872	14.497
Ecad MO PO	Non Clone- Clone	h7b2	8.97	405.366	123.158	1877.72	14.497
Ecad MO PO	Non Clone- Clone	h7b2	8.97	369.2	114.154	1656.84	14.497
Ecad MO PO	Non Clone- Clone	h7b2	8.97	320.123	107.154	1322.822	14.497
Ecad MO PO	Non Clone- Clone	h7b2	8.97	270.3	100.345	1434.407	14.497
Ecad MO PO	Non Clone- Clone
Ecad MO PO	Non Clone- Clone	h7b3	7.187	708.175	203.951	2245.457	11.597
Ecad MO PO	Non Clone- Clone	h7b3	7.187	618.687	228.181	1916.65	11.597
Ecad MO PO	Non Clone- Clone	h7b3	7.187	526.868	228.661	1275.002	11.597
Ecad MO PO	Non Clone- Clone	h7b3	7.187	418.668	206.297	1380.024	11.597
Ecad MO PO	Non Clone- Clone	h7b3	7.187	332.004	172.621	1174.712	11.597
Ecad MO PO	Non Clone- Clone	h7b3	7.187	267.417	142.792	697.462	11.597
Ecad MO PO	Non Clone- Clone
Ecad MO PO	Non Clone- Clone	h7b4	10.212	757.84	218.841	3874.476	16.517
Ecad MO PO	Non Clone- Clone	h7b4	10.212	739.469	251.722	4095	16.517
Ecad MO PO	Non Clone- Clone	h7b4	10.212	683.362	231.738	4095	16.517
Ecad MO PO	Non Clone- Clone	h7b4	10.212	617.054	230.044	2457.138	16.517
Ecad MO PO	Non Clone- Clone	h7b4	10.212	573.412	195.173	1665.716	16.517
Ecad MO PO	Non Clone- Clone	h7b4	10.212	530.024	208.144	1762.144	16.517
Ecad MO PO	Non Clone- Clone	h7b4	10.212	474.797	154.627	1404.209	16.517
Ecad MO PO	Non Clone- Clone
Ecad MO PO	Non Clone- Clone	h7b5	9.672	563.608	167.506	4094.824	15.639
Ecad MO PO	Non Clone- Clone	h7b5	9.672	501.706	164.98	2586.488	15.639
Ecad MO PO	Non Clone- Clone	h7b5	9.672	429.967	162.911	1538.172	15.639
Ecad MO PO	Non Clone- Clone	h7b5	9.672	395.883	150.674	1152.709	15.639
Ecad MO PO	Non Clone- Clone	h7b5	9.672	374.946	145.273	1230.027	15.639
Ecad MO PO	Non Clone- Clone
Ecad MO PO	Non Clone- Clone	h7b6	9.618	668.417	206.454	2493.494	15.551
Ecad MO PO	Non Clone- Clone	h7b6	9.618	582.973	198.479	2588.466	15.551
Ecad MO PO	Non Clone- Clone	h7b6	9.618	441.96	163.011	1350.526	15.551
Ecad MO PO	Non Clone- Clone	h7b6	9.618	349.731	151.814	886.636	15.551
Ecad MO PO	Non Clone- Clone	h7b6	9.618	300.254	137.571	706.778	15.551
Ecad MO PO	Non Clone- Clone	h7b6	9.618	287.176	126.602	816.934	15.551
Ecad MO PO	Non Clone- Clone
Ecad MO PO	Non Clone- Clone	h7b7	7.673	475.73	131.095	1934.16	12.388
Ecad MO PO	Non Clone- Clone	h7b7	7.673	406.344	132.402	1346.013	12.388
Ecad MO PO	Non Clone- Clone	h7b7	7.673	324.101	129.532	1050.937	12.388
Ecad MO PO	Non Clone- Clone	h7b7	7.673	265.56	111.806	1087.176	12.388
Ecad MO PO	Non Clone- Clone	h7b7	7.673	229.736	115.014	845.848	12.388
Ecad MO PO	Non Clone- Clone
Ecad MO PO	Non Clone- Clone	h7b8	9.402	545.13	158.824	3675.385	15.2
Ecad MO PO	Non Clone- Clone	h7b8	9.402	496.235	160.08	1954.86	15.2
Ecad MO PO	Non Clone- Clone	h7b8	9.402	438.014	166.36	1430.095	15.2
Ecad MO PO	Non Clone- Clone	h7b8	9.402	398.351	154.104	1871.426	15.2
Ecad MO PO	Non Clone- Clone	h7b8	9.402	377.499	138.025	1947.533	15.2
Ecad MO PO	Non Clone- Clone
Ecad MO PO	Non Clone- Clone	h7b9	8.213	630.941	290.429	1857.765	13.267
Ecad MO PO	Non Clone- Clone	h7b9	8.213	623.18	283.986	2311.456	13.267
Ecad MO PO	Non Clone- Clone	h7b9	8.213	623.307	266.777	2923.207	13.267
Ecad MO PO	Non Clone- Clone	h7b9	8.213	610.519	226.755	3226.151	13.267
Ecad MO PO	Non Clone- Clone	h7b9	8.213	579.268	190.534	1728.341	13.267
Ecad MO PO	Non Clone- Clone	h7b9	8.213	543.74	164.935	1863.298	13.267
Ecad MO PO	Non Clone- Clone	h7b9	8.213	543.74	164.935	1863.298	13.267
Ecad MO PO	Non Clone- Clone	h8b1	9.024	405.577	123.487	1244.787	14.585
Ecad MO PO	Non Clone- Clone	h8b1	9.024	456.034	131.141	1298.557	14.585
Ecad MO PO	Non Clone- Clone	h8b1	9.024	383.157	134.647	921.402	14.585
Ecad MO PO	Non Clone- Clone	h8b1	9.024	271.337	124.606	584.262	14.585
Ecad MO PO	Non Clone- Clone	h8b1	9.024	196.701	110.141	412.023	14.585
Ecad MO PO	Non Clone- Clone	h8b1	9.024	161.808	103.741	297.7	14.585
Ecad MO PO	Non Clone- Clone
Ecad MO PO	Non Clone- Clone	h8b2	9.348	442.582	116.479	1858.71	15.111
Ecad MO PO	Non Clone- Clone	h8b2	9.348	460.803	117.97	3310.764	15.111
Ecad MO PO	Non Clone- Clone	h8b2	9.348	372.689	152.219	2570.19	15.111
Ecad MO PO	Non Clone- Clone	h8b2	9.348	288.948	116.865	844.301	15.111
Ecad MO PO	Non Clone- Clone	h8b2	9.348	257.291	122.021	850.877	15.111
Ecad MO PO	Non Clone- Clone	h8b2	9.348	226.952	114.519	539.97	15.111
Ecad MO PO	Non Clone- Clone	h8b2	9.348	202.814	108.835	403.236	15.111
Ecad MO PO	Non Clone- Clone
Ecad MO PO	Non Clone- Clone	h8b3	7.349	414.239	135.302	1031.904	11.853
Ecad MO PO	Non Clone- Clone	h8b3	7.349	426.664	129.583	1268.202	11.853
Ecad MO PO	Non Clone- Clone	h8b3	7.349	382.569	128.709	953.028	11.853
Ecad MO PO	Non Clone- Clone	h8b3	7.349	336.275	121.136	1174.071	11.853
Ecad MO PO	Non Clone- Clone	h8b3	7.349	309.763	114.859	1172.631	11.853
Ecad MO PO	Non Clone- Clone	h8b3	7.349	286.421	117.244	1090.282	11.853
Ecad MO PO	Non Clone- Clone	h8b3	7.349	262.901	120.724	878.654	11.853
Ecad MO PO	Non Clone- Clone	h8b3	7.349	234.693	115.077	999.414	11.853
Ecad MO PO	Non Clone- Clone
Ecad MO PO	Non Clone- Clone	h8b4	7.024	444.869	175.402	1306.953	11.333
Ecad MO PO	Non Clone- Clone	h8b4	7.024	435.008	165.531	1507.18	11.333
Ecad MO PO	Non Clone- Clone	h8b4	7.024	417.603	154.4	1437.567	11.333
Ecad MO PO	Non Clone- Clone	h8b4	7.024	393.724	156.581	1550.809	11.333
Ecad MO PO	Non Clone- Clone	h8b4	7.024	370.172	152.235	1298.664	11.333
Ecad MO PO	Non Clone- Clone	h8b4	7.024	335.471	131.318	1387.224	11.333
Ecad MO PO	Non Clone- Clone	h8b4	7.024	303.098	121.904	1471.45	11.333
Ecad MO PO	Non Clone- Clone	h8b4	7.024	277.47	111.83	1289.082	11.333
Ecad MO PO	Non Clone- Clone
Ecad MO PO	Non Clone- Clone	h8b5	8.051	396.234	177.647	935.534	13.002
Ecad MO PO	Non Clone- Clone	h8b5	8.051	339.158	140.089	803.602	13.002
Ecad MO PO	Non Clone- Clone	h8b5	8.051	250.896	116.919	520.668	13.002
Ecad MO PO	Non Clone- Clone	h8b5	8.051	187.449	115.533	405.306	13.002
Ecad MO PO	Non Clone- Clone	h8b5	8.051	165.488	101.381	391.861	13.002
Ecad MO PO	Non Clone- Clone	h8b5	8.051	147.488	98.009	340.932	13.002
Ecad MO PO	Non Clone- Clone
Ecad MO NO	Non Clone- Non Clone	h1b1	11.833	551.738	139.864	2080.634	19.153
Ecad MO NO	Non Clone- Non Clone	h1b1	11.833	610.404	133.118	3099.716	19.153
Ecad MO NO	Non Clone- Non Clone	h1b1	11.833	643.041	134.669	3570.801	19.153
Ecad MO NO	Non Clone- Non Clone	h1b1	11.833	665.579	151.229	4076.188	19.153
Ecad MO NO	Non Clone- Non Clone	h1b1	11.833	608.978	142.729	3924.274	19.153
Ecad MO NO	Non Clone- Non Clone	h1b1	11.833	513.258	130.17	2016.562	19.153
Ecad MO NO	Non Clone- Non Clone	h1b1	11.833	446.322	130.595	1432.907	19.153
Ecad MO NO	Non Clone- Non Clone	h1b1	11.833	360.212	141.851	1242.377	19.153
Ecad MO NO	Non Clone- Non Clone	h1b1	11.833	282.336	129.88	842.666	19.153
Ecad MO NO	Non Clone- Non Clone
Ecad MO NO	Non Clone- Non Clone	h1b2	6.7	810.875	207.165	3859.743	10.806
Ecad MO NO	Non Clone- Non Clone	h1b2	6.7	872.104	254.492	3253.643	10.806
Ecad MO NO	Non Clone- Non Clone	h1b2	6.7	883.474	226.916	3742.528	10.806
Ecad MO NO	Non Clone- Non Clone	h1b2	6.7	831.543	173.403	3997.746	10.806
Ecad MO NO	Non Clone- Non Clone	h1b2	6.7	715.354	187.154	3709.431	10.806
Ecad MO NO	Non Clone- Non Clone	h1b2	6.7	599.539	190.202	2387.582	10.806
Ecad MO NO	Non Clone- Non Clone	h1b2	6.7	439.066	171.996	1900.578	10.806
Ecad MO NO	Non Clone- Non Clone	h1b2	6.7	314.852	153.18	1230.139	10.806
Ecad MO NO	Non Clone- Non Clone	h1b2	6.7	228.174	124.42	507.711	10.806
Ecad MO NO	Non Clone- Non Clone
Ecad MO NO	Non Clone- Non Clone	h1b3	8.645	544.96	128.492	1515.355	13.969
Ecad MO NO	Non Clone- Non Clone	h1b3	8.645	549.623	115.572	2050.246	13.969
Ecad MO NO	Non Clone- Non Clone	h1b3	8.645	540.711	122.856	2517.838	13.969
Ecad MO NO	Non Clone- Non Clone	h1b3	8.645	528.744	120.198	1930.044	13.969
Ecad MO NO	Non Clone- Non Clone	h1b3	8.916	513.573	120.054	1708.033	14.409
Ecad MO NO	Non Clone- Non Clone	h1b3	8.916	423.758	100.74	1155.313	14.409
Ecad MO NO	Non Clone- Non Clone	h1b3	8.916	367.102	119.946	899.146	14.409
Ecad MO NO	Non Clone- Non Clone	h1b3	8.916	303.21	110.942	610.987	14.409
Ecad MO NO	Non Clone- Non Clone	h1b3	8.916	245.43	126.371	607.406	14.409
Ecad MO NO	Non Clone- Non Clone	h1b3	8.916	205.353	109.493	684.058	14.409
Ecad MO NO	Non Clone- Non Clone
Ecad MO NO	Non Clone- Non Clone	h1b4	7.727	738.914	164.593	3074.27	12.476
Ecad MO NO	Non Clone- Non Clone	h1b4	7.727	652.971	183.566	2378.738	12.476
Ecad MO NO	Non Clone- Non Clone	h1b4	7.727	616.347	175.011	2707.256	12.476
Ecad MO NO	Non Clone- Non Clone	h1b4	7.727	583.427	173.242	2061.336	12.476
Ecad MO NO	Non Clone- Non Clone	h1b4	7.727	532.989	199.215	1643.453	12.476
Ecad MO NO	Non Clone- Non Clone	h1b4	7.727	501.658	188.741	1777.597	12.476
Ecad MO NO	Non Clone- Non Clone	h1b4	7.727	479.738	192.028	1893.606	12.476
Ecad MO NO	Non Clone- Non Clone	h1b4	7.727	429.51	167.211	1826.319	12.476
Ecad MO NO	Non Clone- Non Clone	h1b4	7.727	352.309	134.293	1019.849	12.476
Ecad MO NO	Non Clone- Non Clone	h1b4	7.727	274.101	120.638	933.151	12.476
Ecad MO NO	Non Clone- Non Clone
Ecad MO NO	Non Clone- Non Clone	h1b5	7.565	679.407	179.615	2865.585	12.212
Ecad MO NO	Non Clone- Non Clone	h1b5	7.565	648.84	210.511	1580.499	12.212
Ecad MO NO	Non Clone- Non Clone	h1b5	7.565	478.696	184.267	1091.202	12.212
Ecad MO NO	Non Clone- Non Clone	h1b5	7.565	332.962	160.342	593.291	12.212
Ecad MO NO	Non Clone- Non Clone	h1b5	7.565	281.223	160.905	548.005	12.212
Ecad MO NO	Non Clone- Non Clone	h1b5	7.565	231.548	136.389	467.152	12.212
Ecad MO NO	Non Clone- Non Clone	h1b5	7.565	202.429	111.218	460.662	12.212
Ecad MO NO	Non Clone- Non Clone
Ecad MO NO	Non Clone- Non Clone	h1b6	9.456	637.74	125.537	3082.27	15.287
Ecad MO NO	Non Clone- Non Clone	h1b6	9.456	630.608	114.439	3307.802	15.287
Ecad MO NO	Non Clone- Non Clone	h1b6	9.456	573.007	128.693	2820.981	15.287
Ecad MO NO	Non Clone- Non Clone	h1b6	8.321	579.542	125.666	4026.707	13.442
Ecad MO NO	Non Clone- Non Clone	h1b6	8.321	503.453	120.634	1584.624	13.442
Ecad MO NO	Non Clone- Non Clone	h1b6	8.321	439.718	119.822	1403.3	13.442
Ecad MO NO	Non Clone- Non Clone	h1b6	8.321	350.505	110.246	1023.088	13.442
Ecad MO NO	Non Clone- Non Clone	h1b6	8.321	287.348	105.835	1039.282	13.442
Ecad MO NO	Non Clone- Non Clone	h1b6	8.321	232.956	113.956	1131.313	13.442
Ecad MO NO	Non Clone- Non Clone	h1b6	8.321	195.913	113.761	769.271	13.442
Ecad MO NO	Non Clone- Non Clone
Ecad MO NO	Non Clone- Non Clone	h1b7	9.78	561.071	108.318	3511.239	15.815
Ecad MO NO	Non Clone- Non Clone	h1b7	9.78	581.746	103.542	4093.957	15.815
Ecad MO NO	Non Clone- Non Clone	h1b7	9.78	528.938	129.823	3992.359	15.815
Ecad MO NO	Non Clone- Non Clone	h1b7	9.78	439.524	128.969	1725.215	15.815
Ecad MO NO	Non Clone- Non Clone	h1b7	9.348	649.918	165.696	2084.527	15.111
Ecad MO NO	Non Clone- Non Clone	h1b7	9.348	511.629	201.574	1629.214	15.111
Ecad MO NO	Non Clone- Non Clone	h1b7	9.348	370.847	157.051	703.051	15.111
Ecad MO NO	Non Clone- Non Clone	h1b7	9.348	267.043	115.249	574.365	15.111
Ecad MO NO	Non Clone- Non Clone
Ecad MO NO	Non Clone- Non Clone	h1b8	9.348	556.694	141.338	1544.474	15.112
Ecad MO NO	Non Clone- Non Clone	h1b8	9.348	525.621	145.496	1802.063	15.112
Ecad MO NO	Non Clone- Non Clone	h1b8	9.348	468.795	162.765	2337.698	15.112
Ecad MO NO	Non Clone- Non Clone	h1b8	9.348	412.471	155.037	2022.848	15.112
Ecad MO NO	Non Clone- Non Clone	h1b8	9.348	347.505	148.406	1490.718	15.112
Ecad MO NO	Non Clone- Non Clone	h1b8	9.348	266.704	115.72	760.989	15.112
Ecad MO NO	Non Clone- Non Clone	h1b8	9.348	202.91	111.829	439.061	15.112
Ecad MO NO	Non Clone- Non Clone	h2b1	11.077	419.217	167.241	1341.745	17.923
Ecad MO NO	Non Clone- Non Clone	h2b1	11.077	373.663	153.103	2098.094	17.923
Ecad MO NO	Non Clone- Non Clone	h2b1	11.077	320.922	135.174	1163.942	17.923
Ecad MO NO	Non Clone- Non Clone	h2b1	11.077	256.606	119.143	1183.214	17.923
Ecad MO NO	Non Clone- Non Clone	h2b1	11.077	215.595	114.287	1354.409	17.923
Ecad MO NO	Non Clone- Non Clone	h2b1	11.077	195.002	106.823	628.845	17.923
Ecad MO NO	Non Clone- Non Clone
Ecad MO NO	Non Clone- Non Clone	h2b2	12.212	469.677	144.775	4095	19.768
Ecad MO NO	Non Clone- Non Clone	h2b2	12.212	372.303	108.76	1083.544	19.768
Ecad MO NO	Non Clone- Non Clone	h2b2	12.212	305.807	145.787	912.796	19.768
Ecad MO NO	Non Clone- Non Clone	h2b2	12.212	246.111	124.875	568.408	19.768
Ecad MO NO	Non Clone- Non Clone	h2b2	12.212	218.224	110.643	454.613	19.768
Ecad MO NO	Non Clone- Non Clone	h2b2	12.212	209.93	103.75	959.562	19.768
Ecad MO NO	Non Clone- Non Clone
Ecad MO NO	Non Clone- Non Clone	h2b3	8.808	411.392	165.771	2088.165	14.233
Ecad MO NO	Non Clone- Non Clone	h2b3	8.808	448.948	176.341	3002.576	14.233
Ecad MO NO	Non Clone- Non Clone	h2b3	8.808	392.972	152.132	1675.733	14.233
Ecad MO NO	Non Clone- Non Clone	h2b3	8.808	323.834	141.657	819.271	14.233
Ecad MO NO	Non Clone- Non Clone	h2b3	8.808	264.965	121.787	678.433	14.233
Ecad MO NO	Non Clone- Non Clone	h2b3	8.808	241.148	131.305	667.79	14.233
Ecad MO NO	Non Clone- Non Clone
Ecad MO NO	Non Clone- Non Clone	h2b4	7.781	566.265	125.854	1777.045	12.564
Ecad MO NO	Non Clone- Non Clone	h2b4	7.781	406.882	151.293	1222.557	12.564
Ecad MO NO	Non Clone- Non Clone	h2b4	7.781	313.767	125.771	768.205	12.564
Ecad MO NO	Non Clone- Non Clone	h2b4	7.781	243.897	126.087	585.818	12.564
Ecad MO NO	Non Clone- Non Clone	h2b4	7.781	197.088	99.929	478.062	12.564
Ecad MO NO	Non Clone- Non Clone	h2b4	7.781	181.259	103.696	511.296	12.564
Ecad MO NO	Non Clone- Non Clone
Ecad MO NO	Non Clone- Non Clone	h2b5	6.754	648.594	186.34	3282.718	10.894
Ecad MO NO	Non Clone- Non Clone	h2b5	6.754	642.624	183.146	3503.504	10.894
Ecad MO NO	Non Clone- Non Clone	h2b5	6.754	517.831	182.046	1795.886	10.894
Ecad MO NO	Non Clone- Non Clone	h2b5	6.754	394.074	154.857	1893.511	10.894
Ecad MO NO	Non Clone- Non Clone	h2b5	6.754	272.093	130.74	1569.635	10.894
Ecad MO NO	Non Clone- Non Clone	h2b5	6.754	213.919	114.62	627.867	10.894
Ecad MO NO	Non Clone- Non Clone	h2b5	6.754	169.317	99.888	421.936	10.894
Ecad MO NO	Non Clone- Non Clone
Ecad MO NO	Non Clone- Non Clone	h2b6	12.32	560.213	166.548	2212.979	19.944
Ecad MO NO	Non Clone- Non Clone	h2b6	12.32	520.062	141.906	2627.194	19.944
Ecad MO NO	Non Clone- Non Clone	h2b6	12.32	387.389	145.468	1978.43	19.944
Ecad MO NO	Non Clone- Non Clone	h2b6	12.32	282.337	126.568	798.934	19.944
Ecad MO NO	Non Clone- Non Clone	h2b6	12.32	204.438	105.748	492.74	19.944
Ecad MO NO	Non Clone- Non Clone	h2b6	12.32	159.587	107.583	370.158	19.944
Ecad MO NO	Non Clone- Non Clone	h2b6	12.32	140.421	100.993	263.59	19.944
Ecad MO NO	Non Clone- Non Clone
Ecad MO NO	Non Clone- Non Clone	h2b7	6.268	657.648	178.709	2693.834	10.104
Ecad MO NO	Non Clone- Non Clone	h2b7	6.268	591.17	190.368	2523.742	10.104
Ecad MO NO	Non Clone- Non Clone	h2b7	6.268	428.666	173.588	1121.863	10.104
Ecad MO NO	Non Clone- Non Clone	h2b7	6.268	320.546	141.707	1036.89	10.104
Ecad MO NO	Non Clone- Non Clone	h2b7	6.268	233.593	119.041	493.623	10.104
Ecad MO NO	Non Clone- Non Clone	h3b1	10.212	450.149	147.149	1885.274	16.517
Ecad MO NO	Non Clone- Non Clone	h3b1	10.212	421.308	141.992	1152.227	16.517
Ecad MO NO	Non Clone- Non Clone	h3b1	10.212	366.551	130.513	1734.857	16.517
Ecad MO NO	Non Clone- Non Clone	h3b1	10.212	302.743	114.986	2105.933	16.517
Ecad MO NO	Non Clone- Non Clone	h3b1	10.212	262.391	116.065	1649.034	16.517
Ecad MO NO	Non Clone- Non Clone
Ecad MO NO	Non Clone- Non Clone	h3b2	10.429	432.653	126.222	3281.817	16.869
Ecad MO NO	Non Clone- Non Clone	h3b2	10.429	357.05	133.856	2508.394	16.869
Ecad MO NO	Non Clone- Non Clone	h3b2	10.429	272.519	127.296	770.408	16.869
Ecad MO NO	Non Clone- Non Clone	h3b2	10.429	221.371	117.447	594.071	16.869
Ecad MO NO	Non Clone- Non Clone	h3b2	10.429	196.669	116.382	660.898	16.869
Ecad MO NO	Non Clone- Non Clone	h3b2	10.429	178.162	112.068	522.64	16.869
Ecad MO NO	Non Clone- Non Clone
Ecad MO NO	Non Clone- Non Clone	h3b3	8.321	441.43	122.779	3239.249	13.442
Ecad MO NO	Non Clone- Non Clone	h3b3	8.321	380.656	111.401	1879.746	13.442
Ecad MO NO	Non Clone- Non Clone	h3b3	8.321	299.218	111.586	1017.504	13.442
Ecad MO NO	Non Clone- Non Clone	h3b3	8.321	233.031	110.032	654.671	13.442
Ecad MO NO	Non Clone- Non Clone	h3b3	8.321	201.826	108.4	493.753	13.442
Ecad MO NO	Non Clone- Non Clone	h3b3	8.321	175.669	101.364	469.651	13.442
Ecad MO NO	Non Clone- Non Clone
Ecad MO NO	Non Clone- Non Clone	h3b4	10.537	326.044	132.338	2135.802	17.045
Ecad MO NO	Non Clone- Non Clone	h3b4	10.537	315.822	131.573	3245.701	17.045
Ecad MO NO	Non Clone- Non Clone	h3b4	10.537	290.36	123.7	3428.763	17.045
Ecad MO NO	Non Clone- Non Clone	h3b4	10.537	249.631	114.662	1622.816	17.045
Ecad MO NO	Non Clone- Non Clone	h3b4	10.537	224.358	112.268	715.04	17.045
Ecad MO NO	Non Clone- Non Clone	h4b1	6.754	753.62	246.811	2104.823	10.894
Ecad MO NO	Non Clone- Non Clone	h4b1	6.754	667.136	223.672	3449.164	10.894
Ecad MO NO	Non Clone- Non Clone	h4b1	6.754	505.673	165.896	3261.317	10.894
Ecad MO NO	Non Clone- Non Clone	h4b1	7.241	518.152	157.172	1252.585	11.685
Ecad MO NO	Non Clone- Non Clone	h4b1	7.241	487.781	131.85	1303.845	11.685
Ecad MO NO	Non Clone- Non Clone	h4b1	7.241	401.613	127.087	1721.201	11.685
Ecad MO NO	Non Clone- Non Clone	h4b1	7.241	320.326	127.054	2850.797	11.685
Ecad MO NO	Non Clone- Non Clone
Ecad MO NO	Non Clone- Non Clone	h4b2	7.403	758.18	188.58	3796.323	11.949
Ecad MO NO	Non Clone- Non Clone	h4b2	7.403	698.309	187.271	2972.392	11.949
Ecad MO NO	Non Clone- Non Clone	h4b2	7.403	571.662	210.16	2057.626	11.949
Ecad MO NO	Non Clone- Non Clone	h4b2	7.403	452.83	183.96	3372.901	11.949
Ecad MO NO	Non Clone- Non Clone	h4b2	7.403	348.446	165.849	3927.246	11.949
Ecad MO NO	Non Clone- Non Clone	h4b2	7.403	274.533	137.847	2269.845	11.949
Ecad MO NO	Non Clone- Non Clone
Ecad MO NO	Non Clone- Non Clone	h4b3	6.7	942.212	202.707	3788.207	10.807
Ecad MO NO	Non Clone- Non Clone	h4b3	6.7	962.102	280.308	2772.197	10.807
Ecad MO NO	Non Clone- Non Clone	h4b3	6.7	871.662	343.277	1923.781	10.807
Ecad MO NO	Non Clone- Non Clone	h4b3	6.7	695.189	261.915	1719.227	10.807
Ecad MO NO	Non Clone- Non Clone	h4b3	6.7	560.344	237.451	1618.426	10.807
Ecad MO NO	Non Clone- Non Clone	h4b3	6.7	458.896	201.105	1326.265	10.807
Ecad MO NO	Non Clone- Non Clone	h4b3	6.7	380.554	169.769	970.809	10.807
Ecad MO NO	Non Clone- Non Clone
Ecad MO NO	Non Clone- Non Clone	h4b4	8.754	730.825	263.714	2378.907	14.145
Ecad MO NO	Non Clone- Non Clone	h4b4	8.754	617.623	213.063	2631.575	14.145
Ecad MO NO	Non Clone- Non Clone	h4b4	8.754	539.762	201.022	2144.201	14.145
Ecad MO NO	Non Clone- Non Clone	h4b4	8.754	423.973	165.494	1662.127	14.145
Ecad MO NO	Non Clone- Non Clone	h4b4	8.754	338.305	149.531	1441.907	14.145
Ecad MO NO	Non Clone- Non Clone	h4b4	8.754	287.882	125.4	1175.826	14.145
Ecad MO NO	Non Clone- Non Clone	h4b4	8.754	263.467	118.876	1299.146	14.145
Ecad MO NO	Non Clone- Non Clone
Ecad MO NO	Non Clone- Non Clone	h4b5	6.916	908.187	269.624	2631.941	11.158
Ecad MO NO	Non Clone- Non Clone	h4b5	6.916	906.752	236.092	2555.866	11.158
Ecad MO NO	Non Clone- Non Clone	h4b5	6.916	853.835	272.315	2649.42	11.158
Ecad MO NO	Non Clone- Non Clone	h4b5	6.916	785.896	216.437	2632.755	11.158
Ecad MO NO	Non Clone- Non Clone	h4b5	6.916	599.089	227.85	2140.955	11.158
Ecad MO NO	Non Clone- Non Clone	h4b5	6.916	408.338	172.049	1356.609	11.158
Ecad MO NO	Non Clone- Non Clone	h4b5	6.916	303.019	138.168	812.507	11.158
Ecad MO NO	Non Clone- Non Clone
Ecad MO NO	Non Clone- Non Clone	h4b6	7.619	894.377	210.924	3411.675	12.289
Ecad MO NO	Non Clone- Non Clone	h4b6	7.619	830.055	268.45	2361.006	12.289
Ecad MO NO	Non Clone- Non Clone	h4b6	7.619	671.315	188.674	2341.682	12.289
Ecad MO NO	Non Clone- Non Clone	h4b6	7.619	504.409	154.164	1458.456	12.289
Ecad MO NO	Non Clone- Non Clone	h4b6	7.619	368.106	118.841	956.283	12.289
Ecad MO NO	Non Clone- Non Clone	h4b6	7.619	253.212	112.69	696.756	12.289
Ecad MO NO	Non Clone- Non Clone
Ecad MO NO	Non Clone- Non Clone	h4b7	8.375	746.903	286.439	3114.866	13.53
Ecad MO NO	Non Clone- Non Clone	h4b7	8.375	713.706	226.577	2824.269	13.53
Ecad MO NO	Non Clone- Non Clone	h4b7	8.375	610.291	257.533	2188.131	13.53
Ecad MO NO	Non Clone- Non Clone	h4b7	8.375	505.607	216.682	1550.106	13.53
Ecad MO NO	Non Clone- Non Clone	h4b7	8.375	393.311	153.194	1079.112	13.53
Ecad MO NO	Non Clone- Non Clone	h4b7	8.375	310.456	139.12	976.226	13.53
Ecad MO NO	Non Clone- Non Clone
Ecad MO NO	Non Clone- Non Clone	h4b8	8.754	789.266	219.198	3910.999	14.145
Ecad MO NO	Non Clone- Non Clone	h4b8	8.754	787.794	227.163	3903.212	14.145
Ecad MO NO	Non Clone- Non Clone	h4b8	8.754	740.495	213	3600.76	14.145
Ecad MO NO	Non Clone- Non Clone	h4b8	8.754	644.545	196.707	2121.5	14.145
Ecad MO NO	Non Clone- Non Clone	h4b8	8.754	546.359	180.174	1585.49	14.145
Ecad MO NO	Non Clone- Non Clone	h4b8	8.754	487.667	146.655	1178.79	14.145
Ecad MO NO	Non Clone- Non Clone
Ecad MO NO	Non Clone- Non Clone	h4b9	6.916	543.385	163.175	1645.431	11.158
Ecad MO NO	Non Clone- Non Clone	h4b9	6.916	560.75	162.04	1865.098	11.158
Ecad MO NO	Non Clone- Non Clone	h4b9	6.916	495.365	176.851	1240.309	11.158
Ecad MO NO	Non Clone- Non Clone	h4b9	6.916	431.987	162.577	1016.773	11.158
Ecad MO NO	Non Clone- Non Clone	h4b9	6.916	381.455	162.233	961.761	11.158
Ecad MO NO	Non Clone- Non Clone	h4b9	6.916	340.334	128.35	1003.271	11.158
Ecad MO NO	Non Clone- Non Clone	h4b9	6.916	276.645	139.426	918.124	11.158
Ecad MO NO	Non Clone- Non Clone
Ecad MO NO	Non Clone- Non Clone	h4b10	10.861	696.235	150.754	2960.886	17.572
Ecad MO NO	Non Clone- Non Clone	h4b10	10.861	739.895	163.949	3587.003	17.572
Ecad MO NO	Non Clone- Non Clone	h4b10	10.861	727.674	193.176	3425.184	17.572
Ecad MO NO	Non Clone- Non Clone	h4b10	10.861	640.363	165.681	3242.106	17.572
Ecad MO NO	Non Clone- Non Clone	h4b10	10.861	503.634	168.694	3122.043	17.572
Ecad MO NO	Non Clone- Non Clone	h4b10	10.861	405.836	142.193	1877.038	17.572
Ecad MO NO	Non Clone- Non Clone	h4b10	10.861	346.496	133.24	2302.093	17.572
Ecad MO NO	Non Clone- Non Clone
Ecad MO NO	Non Clone- Non Clone	h4b11	7.078	915.616	211.534	3687.435	11.422
Ecad MO NO	Non Clone- Non Clone	h4b11	7.078	801.647	221.113	2245.762	11.422
Ecad MO NO	Non Clone- Non Clone	h4b11	7.078	674.137	205.038	1946.218	11.422
Ecad MO NO	Non Clone- Non Clone	h4b11	7.078	496.256	168.864	1564.316	11.422
Ecad MO NO	Non Clone- Non Clone	h4b11	7.078	330.811	140.596	785.248	11.422
Ecad MO NO	Non Clone- Non Clone	h4b11	7.078	247.039	133.761	449.693	11.422
Ecad MO NO	Non Clone- Non Clone	h5b13	6.322	814.83	238.385	2623.368	10.192
Ecad MO NO	Non Clone- Non Clone	h5b13	6.322	755.78	280.981	2005.899	10.192
Ecad MO NO	Non Clone- Non Clone	h5b13	6.322	597.561	181.706	1573.301	10.192
Ecad MO NO	Non Clone- Non Clone	h5b13	6.322	419.526	146.994	990.698	10.192
Ecad MO NO	Non Clone- Non Clone	h5b13	6.322	313.4	125.218	838.75	10.192
[truncated: 215 more rows]
