# Supplementary material for: Stepwise polarisation of developing bilayered epidermis is mediated by aPKC and E-cadherin in zebrafish
Source: eLife journal article supplement (doi:10.7554/elife.49064), 2020-01-22
Supplement: fig4-figsupp2-data3 [file elife-49064-fig4-figsupp2-data3-v1.csv]

Genotype	Boundary	Cell name	Area	Mean	Min	Max	Length
Ctrl MO CO	Clone- Clone	h1b1	11.077	262.163	107.133	577.625	17.923
Ctrl MO CO	Clone- Clone	h1b1	11.077	278.763	116.105	610.203	17.923
Ctrl MO CO	Clone- Clone	h1b1	11.077	284.921	112.605	817.858	17.923
Ctrl MO CO	Clone- Clone	h1b1	11.077	265.802	108.797	907.498	17.923
Ctrl MO CO	Clone- Clone	h1b1	11.077	250.741	105.973	861.913	17.923
Ctrl MO CO	Clone- Clone	h1b1	11.077	243.071	103.873	872.291	17.923
Ctrl MO CO	Clone- Clone	h1b1	11.077	235.487	115.382	927.153	17.923
Ctrl MO CO	Clone- Clone	h1b1	11.077	231.229	110.526	909.281	17.923
Ctrl MO CO	Clone- Clone	h1b1	11.077	242.021	108.506	1610.995	17.923
Ctrl MO CO	Clone- Clone
Ctrl MO CO	Clone- Clone	h1b2	14.103	256.342	107.341	811.156	22.843
Ctrl MO CO	Clone- Clone	h1b2	14.103	276.655	107.771	893.914	22.843
Ctrl MO CO	Clone- Clone	h1b2	14.103	272.473	113.531	897.55	22.843
Ctrl MO CO	Clone- Clone	h1b2	14.103	264.641	107.26	821.851	22.843
Ctrl MO CO	Clone- Clone	h1b2	14.103	262.604	115.45	894.471	22.843
Ctrl MO CO	Clone- Clone	h1b2	14.103	270.299	119.076	904.408	22.843
Ctrl MO CO	Clone- Clone	h1b2	14.103	279.111	108.38	930.335	22.843
Ctrl MO CO	Clone- Clone	h1b2	14.103	290.987	119.195	965.748	22.843
Ctrl MO CO	Clone- Clone	h1b2	14.103	314.639	118.054	991.065	22.843
Ctrl MO CO	Clone- Clone	h1b2	14.103	347.914	126.413	1377.577	22.843
Ctrl MO CO	Clone- Clone	h1b2	14.103	372.65	133.136	1811.244	22.843
Ctrl MO CO	Clone- Clone	h1b2	14.103	373.849	134.388	1475.831	22.843
Ctrl MO CO	Clone- Clone
Ctrl MO CO	Clone- Clone	h2b1	9.888	283.249	112.521	923.395	15.99
Ctrl MO CO	Clone- Clone	h2b1	9.888	301.749	119.446	1009.467	15.99
Ctrl MO CO	Clone- Clone	h2b1	9.888	320.518	114.642	1091.634	15.99
Ctrl MO CO	Clone- Clone	h2b1	9.888	336.446	112.773	1068.866	15.99
Ctrl MO CO	Clone- Clone	h2b1	9.888	345.9	119.298	1092.779	15.99
Ctrl MO CO	Clone- Clone	h2b1	9.888	365.285	118.508	1506.211	15.99
Ctrl MO CO	Clone- Clone	h2b1	9.888	380.894	119.046	1365.271	15.99
Ctrl MO CO	Clone- Clone	h2b1	9.888	401.285	137.167	1264.276	15.99
Ctrl MO CO	Clone- Clone	h2b1	9.888	388.423	126.225	1221.643	15.99
Ctrl MO CO	Clone- Clone
Ctrl MO CO	Clone- Clone	h2b2	5.89	188.685	103.453	858.814	9.489
Ctrl MO CO	Clone- Clone	h2b2	5.89	237.586	102.936	1143.398	9.489
Ctrl MO CO	Clone- Clone	h2b2	5.89	261.153	106.825	1169.269	9.489
Ctrl MO CO	Clone- Clone	h2b2	5.89	270.04	102.264	980.47	9.489
Ctrl MO CO	Clone- Clone	h2b2	5.89	269.291	104.983	887.733	9.489
Ctrl MO CO	Clone- Clone	h2b2	5.944	379.699	127.135	837.31	9.577
Ctrl MO CO	Clone- Clone	h2b2	5.944	360.567	115.972	882.621	9.577
Ctrl MO CO	Clone- Clone	h2b2	5.944	329.308	127.19	819.429	9.577
Ctrl MO CO	Clone- Clone	h2b2	5.944	309.97	136.083	782.91	9.577
Ctrl MO CO	Clone- Clone	h2b2	5.944	292.553	118.671	866.821	9.577
Ctrl MO CO	Clone- Clone	h2b2	5.944	289.094	115.295	905.371	9.577
Ctrl MO CO	Clone- Clone	h2b2	5.89	333.201	139.635	734.041	9.489
Ctrl MO CO	Clone- Clone	h2b2	5.89	341.322	138.8	853.049	9.489
Ctrl MO CO	Clone- Clone	h2b2	5.89	352.177	137.318	1336.35	9.489
Ctrl MO CO	Clone- Clone	h2b2	5.89	374.256	145.504	1779.475	9.489
Ctrl MO CO	Clone- Clone
Ctrl MO CO	Clone- Clone	h2b3	11.563	230.079	97.824	633.029	18.714
Ctrl MO CO	Clone- Clone	h2b3	11.563	234.447	97.605	772.544	18.714
Ctrl MO CO	Clone- Clone	h2b3	11.563	218.783	98.783	862.672	18.714
Ctrl MO CO	Clone- Clone	h2b3	10.699	349.342	125.68	1106.161	17.308
Ctrl MO CO	Clone- Clone	h2b3	10.699	339.174	120.225	909.437	17.308
Ctrl MO CO	Clone- Clone	h2b3	10.699	332.953	123.354	872.346	17.308
Ctrl MO CO	Clone- Clone	h2b3	10.699	321.148	118.006	833.438	17.308
Ctrl MO CO	Clone- Clone	h2b3	10.699	309.558	138.435	893.827	17.308
Ctrl MO CO	Clone- Clone	h2b3	10.699	294.835	131.751	894.022	17.308
Ctrl MO CO	Clone- Clone	h3b1	12.914	239.714	106.628	721.227	20.91
Ctrl MO CO	Clone- Clone	h3b1	12.914	292.26	106.47	1195.827	20.91
Ctrl MO CO	Clone- Clone	h3b1	12.914	326.017	114.396	1324.007	20.91
Ctrl MO CO	Clone- Clone	h3b1	12.914	348.604	119.546	1573.931	20.91
Ctrl MO CO	Clone- Clone	h3b1	12.914	363.257	127.529	1358.496	20.91
Ctrl MO CO	Clone- Clone	h3b1	12.914	385.64	122.619	1896.031	20.91
Ctrl MO CO	Clone- Clone	h3b1	12.914	377.154	130.685	1480.398	20.91
Ctrl MO CO	Clone- Clone
Ctrl MO CO	Clone- Clone	h3b2	12.752	240.998	109.876	984.208	20.647
Ctrl MO CO	Clone- Clone	h3b2	12.752	314.8	117.035	1566.523	20.647
Ctrl MO CO	Clone- Clone	h3b2	12.752	382.278	122.254	1940.588	20.647
Ctrl MO CO	Clone- Clone	h3b2	12.752	444.893	132.804	2425.257	20.647
Ctrl MO CO	Clone- Clone	h3b2	12.752	473.273	141.751	2675.987	20.647
Ctrl MO CO	Clone- Clone	h3b2	12.752	465.456	147.84	1475.486	20.647
Ctrl MO CO	Clone- Clone	h3b2	12.752	407.699	157.372	2398.219	20.647
Ctrl MO CO	Clone- Clone	h3b2	12.752	379.608	143.829	3750.334	20.647
Ctrl MO CO	Clone- Clone
Ctrl MO CO	Clone- Clone	h3b3	6.7	181.02	0	431.156	10.807
Ctrl MO CO	Clone- Clone	h3b3	6.7	210.474	0	549.15	10.807
Ctrl MO CO	Clone- Clone	h3b3	6.7	242.727	0	729.867	10.807
Ctrl MO CO	Clone- Clone	h3b3	6.7	277.213	0	888.859	10.807
Ctrl MO CO	Clone- Clone	h3b3	6.7	315.998	0	910.851	10.807
Ctrl MO CO	Clone- Clone	h3b3	6.7	386.258	0	784.625	10.807
Ctrl MO CO	Clone- Clone	h3b3	6.7	438.55	0	1007.779	10.807
Ctrl MO CO	Clone- Clone
Ctrl MO CO	Clone- Clone	h3b4	9.24	195.672	104.656	545.406	14.936
Ctrl MO CO	Clone- Clone	h3b4	9.24	224.553	110.633	921.063	14.936
Ctrl MO CO	Clone- Clone	h3b4	9.24	251.228	111.245	1323.213	14.936
Ctrl MO CO	Clone- Clone	h3b4	9.24	289.586	132.026	1458.46	14.936
Ctrl MO CO	Clone- Clone	h3b4	9.24	330.847	130.378	1310.661	14.936
Ctrl MO CO	Clone- Clone	h3b4	9.24	407.398	134.11	1404.719	14.936
Ctrl MO CO	Clone- Clone	h3b4	9.24	425.552	141.731	1438.098	14.936
Ctrl MO CO	Clone- Clone	h3b4	9.24	367.584	158.992	2672.491	14.936
Ctrl MO CO	Clone- Clone
Ctrl MO CO	Clone- Clone	h3b5	9.294	210.978	104.857	582.797	15.024
Ctrl MO CO	Clone- Clone	h3b5	9.294	227.028	99.832	720.879	15.024
Ctrl MO CO	Clone- Clone	h3b5	9.294	281.818	105.76	1288.344	15.024
Ctrl MO CO	Clone- Clone	h3b5	9.294	320.456	110.157	1399.297	15.024
Ctrl MO CO	Clone- Clone	h3b5	9.294	320.006	110.828	1539.837	15.024
Ctrl MO CO	Clone- Clone	h3b5	9.294	309.037	106.594	1544.762	15.024
Ctrl MO CO	Clone- Clone	h3b5	9.294	293.561	116.177	1486.06	15.024
Ctrl MO CO	Clone- Clone	h3b5	9.294	289.257	131.318	1403.438	15.024
Ctrl MO CO	Clone- Clone	h3b5	9.294	307.476	123.667	1322.383	15.024
Ctrl MO CO	Clone- Clone	h4b1	9.942	379.984	115.352	2397	16.078
Ctrl MO CO	Clone- Clone	h4b1	9.942	400.375	121.91	2835.703	16.078
Ctrl MO CO	Clone- Clone	h4b1	9.942	435.668	127.145	2966.002	16.078
Ctrl MO CO	Clone- Clone	h4b1	9.942	500.172	146.137	3259.777	16.078
Ctrl MO CO	Clone- Clone	h4b1	9.942	579.973	161.773	3335.616	16.078
Ctrl MO CO	Clone- Clone	h4b1	9.942	635.464	177.521	2101.98	16.078
Ctrl MO CO	Clone- Clone	h4b1	9.942	631.324	148.612	1787.546	16.078
Ctrl MO CO	Clone- Clone
Ctrl MO CO	Clone- Clone	h4b2	8.537	490.631	149.302	1803.004	13.794
Ctrl MO CO	Clone- Clone	h4b2	8.537	564.618	169.905	2469.496	13.794
Ctrl MO CO	Clone- Clone	h4b2	8.537	638.098	187.525	3155.381	13.794
Ctrl MO CO	Clone- Clone	h4b2	8.537	689.117	184.982	3635.821	13.794
Ctrl MO CO	Clone- Clone	h4b2	8.537	727.772	209.782	2928.532	13.794
Ctrl MO CO	Clone- Clone	h4b2	8.537	832.217	232.48	2472.492	13.794
Ctrl MO CO	Clone- Clone	h4b2	8.537	915.089	250.598	4095	13.794
Ctrl MO CO	Clone- Clone
Ctrl MO CO	Clone- Clone	h4b3	8.7	276.945	104.493	1586.61	14.033
Ctrl MO CO	Clone- Clone	h4b3	8.7	289.461	111.542	2223.383	14.033
Ctrl MO CO	Clone- Clone	h4b3	8.7	288.411	118.54	2937.926	14.033
Ctrl MO CO	Clone- Clone	h4b3	8.7	301.237	112.483	2976.237	14.033
Ctrl MO CO	Clone- Clone	h4b3	8.7	327.806	115.804	2212.12	14.033
Ctrl MO CO	Clone- Clone
Ctrl MO CO	Clone- Clone	h4b4	7.673	474.871	142.173	1230.963	12.388
Ctrl MO CO	Clone- Clone	h4b4	7.673	543.064	172.878	1566.551	12.388
Ctrl MO CO	Clone- Clone	h4b4	7.673	582.092	186.646	1828.618	12.388
Ctrl MO CO	Clone- Clone	h4b4	7.673	565.367	213.938	1725.286	12.388
Ctrl MO CO	Clone- Clone	h4b4	7.673	508.73	181.515	1286.921	12.388
Ctrl MO CO	Clone- Clone	h4b4	7.673	580.375	201.516	1797.804	12.388
Ctrl MO CO	Clone- Clone	h4b4	7.673	683.344	208.089	3148.638	12.388
Ctrl MO CO	Clone- Clone
Ctrl MO CO	Clone- Clone	h4b5	3.458	543.03	123.824	2155.498	5.535
Ctrl MO CO	Clone- Clone	h4b5	3.458	554.658	158.552	2696.351	5.535
Ctrl MO CO	Clone- Clone	h4b5	3.458	581.038	183.007	2456.856	5.535
Ctrl MO CO	Clone- Clone	h4b5	3.458	622.1	188.868	1560.371	5.535
Ctrl MO CO	Clone- Clone	h4b5	3.458	677.977	197.934	1725.837	5.535
Ctrl MO CO	Clone- Clone	h4b5	3.458	560.847	227.297	1229.48	5.535
Ctrl MO CO	Clone- Clone	h4b5	3.458	374.113	221.268	1019.379	5.535
Ctrl MO CO	Clone- Clone
Ctrl MO CO	Clone- Clone	h4b6	8.429	294.542	107.403	1111.785	13.618
Ctrl MO CO	Clone- Clone	h4b6	8.429	276.993	109.698	811.767	13.618
Ctrl MO CO	Clone- Clone	h4b6	8.429	255.495	98.657	1288.466	13.618
Ctrl MO CO	Clone- Clone	h4b6	8.754	582.544	149.344	2426.079	14.145
Ctrl MO CO	Clone- Clone	h4b6	8.754	671.094	193.041	2033.617	14.145
Ctrl MO CO	Clone- Clone	h4b6	8.754	746.441	121.492	1999.618	14.145
Ctrl MO CO	Clone- Clone	h4b6	8.754	724.966	173.855	1856.788	14.145
Ctrl MO CO	Clone- Clone	h4b6	8.754	574.31	177.416	2027.483	14.145
Ctrl MO CO	Clone- Clone
Ctrl MO CO	Clone- Clone	h4b7	5.944	267.608	117.903	965.073	9.577
Ctrl MO CO	Clone- Clone	h4b7	5.944	266.289	122.58	1156.967	9.577
Ctrl MO CO	Clone- Clone	h4b7	5.944	285.53	125.796	1165.881	9.577
Ctrl MO CO	Clone- Clone	h4b7	4.917	690.939	214.027	1749.831	7.907
Ctrl MO CO	Clone- Clone	h4b7	4.917	762.611	198.161	2078.468	7.907
Ctrl MO CO	Clone- Clone	h4b7	4.917	583.522	230.882	1901.584	7.907
Ctrl MO CO	Clone- Clone	h5b1	8.97	296.906	111.205	982.565	14.497
Ctrl MO CO	Clone- Clone	h5b1	8.97	332.782	119.766	1777.531	14.497
Ctrl MO CO	Clone- Clone	h5b1	8.97	312.654	112.236	1799.613	14.497
Ctrl MO CO	Clone- Clone	h5b1	8.97	314.391	133.692	1396.957	14.497
Ctrl MO CO	Clone- Clone	h5b1	8.97	346.338	111.204	1002.192	14.497
Ctrl MO CO	Clone- Clone	h5b1	8.97	386.429	105.905	1263.062	14.497
Ctrl MO CO	Clone- Clone	h5b1	8.97	444.67	103.357	1943.138	14.497
Ctrl MO CO	Clone- Clone	h6b1	11.023	356.384	116.305	931.651	17.835
Ctrl MO CO	Clone- Clone	h6b1	11.023	412.937	109.414	1058.07	17.835
Ctrl MO CO	Clone- Clone	h6b1	11.023	407.074	140.272	1030.773	17.835
Ctrl MO CO	Clone- Clone	h6b1	11.023	376.893	132.426	984.538	17.835
Ctrl MO CO	Clone- Clone	h6b1	11.023	375.915	118.449	925.012	17.835
Ctrl MO CO	Clone- Clone	h6b1	11.023	393.123	152.98	1019.089	17.835
Ctrl MO CO	Clone- Clone	h6b1	11.023	418.453	172.898	1695.696	17.835
Ctrl MO CO	Clone- Clone	h6b1	11.023	479.949	184.35	3962.342	17.835
Ctrl MO CO	Clone- Clone	h6b1	11.023	500.782	147.352	3798.574	17.835
Ctrl MO CO	Clone- Clone	h6b1	11.023	459.942	152.44	3680.309	17.835
Ctrl MO CO	Clone- Clone
Ctrl MO CO	Clone- Clone	h6b2	1.459	294.655	127.032	546.306	2.284
Ctrl MO CO	Clone- Clone	h6b2	1.459	357.195	119.959	888.749	2.284
Ctrl MO CO	Clone- Clone	h6b2	1.459	352.46	139.989	994.819	2.284
Ctrl MO CO	Clone- Clone	h6b2	1.459	311.949	142.698	1027.204	2.284
Ctrl MO CO	Clone- Clone	h6b2	1.945	501.808	190.627	1100.49	3.075
Ctrl MO CO	Clone- Clone	h6b2	1.945	611.471	327.363	1693.703	3.075
Ctrl MO CO	Clone- Clone	h6b2	1.945	738.385	352.586	2873.021	3.075
Ctrl MO CO	Clone- Clone	h6b2	1.945	823.873	313.365	2738.383	3.075
Ctrl MO CO	Clone- Clone	h6b2	1.945	660.998	291.503	1768.889	3.075
Ctrl MO CO	Clone- Clone
Ctrl MO CO	Clone- Clone	h6b3	6.214	372.285	125.32	1111.035	10.016
Ctrl MO CO	Clone- Clone	h6b3	6.214	365.533	132.342	1072.461	10.016
Ctrl MO CO	Clone- Clone	h6b3	6.214	281.108	112.302	923.84	10.016
Ctrl MO CO	Clone- Clone	h6b3	5.62	390.16	150.158	952.147	9.049
Ctrl MO CO	Clone- Clone	h6b3	5.62	547.212	194.934	1611.909	9.049
Ctrl MO CO	Clone- Clone	h6b3	5.62	604.202	209.696	2213.991	9.049
Ctrl MO CO	Clone- Clone	h6b3	5.62	637.498	196.61	2850.763	9.049
Ctrl MO CO	Clone- Clone	h6b3	5.62	671.884	188.697	2109.351	9.049
Ctrl MO CO	Clone- Clone	h6b3	5.62	636.635	215.835	1970.17	9.049
Ctrl MO CO	Clone- Clone	h7b1	12.806	209.926	106.259	594.383	20.735
Ctrl MO CO	Clone- Clone	h7b1	12.806	232.097	103.516	737.126	20.735
Ctrl MO CO	Clone- Clone	h7b1	12.806	249.589	102.109	805.109	20.735
Ctrl MO CO	Clone- Clone	h7b1	12.806	261.441	109.543	881.707	20.735
Ctrl MO CO	Clone- Clone	h7b1	12.806	280.761	108.027	904.416	20.735
Ctrl MO CO	Clone- Clone	h7b1	12.806	295.878	110.631	874.425	20.735
Ctrl MO CO	Clone- Clone	h7b1	12.806	313.853	104.354	874.962	20.735
Ctrl MO CO	Clone- Clone	h7b1	12.806	332.093	115.349	990.927	20.735
Ctrl MO CO	Clone- Clone	h7b1	12.806	340.579	126.257	1237.643	20.735
Ctrl MO CO	Clone- Clone
Ctrl MO CO	Clone- Clone	h8b1	8.321	223.434	108.913	444.522	13.442
Ctrl MO CO	Clone- Clone	h8b1	8.321	307.552	118.273	893.605	13.442
Ctrl MO CO	Clone- Clone	h8b1	8.321	365.425	124.837	1619.934	13.442
Ctrl MO CO	Clone- Clone	h8b1	8.321	367.575	139.017	1543.052	13.442
Ctrl MO CO	Clone- Clone	h8b1	8.321	369.802	140.154	1313.109	13.442
Ctrl MO CO	Clone- Clone	h8b1	8.321	366.202	140.058	1352.159	13.442
Ctrl MO CO	Clone- Clone	h8b1	8.321	357.292	137.353	1033.939	13.442
Ctrl MO CO	Clone- Clone	h8b1	8.321	356.493	151.473	974.631	13.442
Ctrl MO CO	Clone- Clone	h8b1	8.321	364.596	133.16	1086.132	13.442
Ctrl MO CO	Clone- Clone
Ctrl MO CO	Clone- Clone	h8b2	7.889	218.671	102.395	525.107	12.74
Ctrl MO CO	Clone- Clone	h8b2	7.889	289.51	111.408	858.366	12.74
Ctrl MO CO	Clone- Clone	h8b2	7.889	334.317	118.195	1064.025	12.74
Ctrl MO CO	Clone- Clone	h8b2	7.889	335.152	124.023	1074.369	12.74
Ctrl MO CO	Clone- Clone	h8b2	7.889	330.673	135.336	870.978	12.74
Ctrl MO CO	Clone- Clone	h8b2	7.889	332.219	137.319	1106.231	12.74
Ctrl MO CO	Clone- Clone	h8b2	7.889	330.961	136.628	1035.229	12.74
Ctrl MO CO	Clone- Clone
Ctrl MO CO	Clone- Clone	h8b3	10.375	166.989	97.103	558.947	16.781
Ctrl MO CO	Clone- Clone	h8b3	10.375	202.69	100.355	731.573	16.781
Ctrl MO CO	Clone- Clone	h8b3	10.375	234.604	102.454	1205.408	16.781
Ctrl MO CO	Clone- Clone	h8b3	10.375	235.15	103.235	1344.896	16.781
Ctrl MO CO	Clone- Clone	h8b3	10.375	218.126	102.433	1077.509	16.781
Ctrl MO CO	Clone- Clone	h8b3	10.375	215.59	104.483	972.081	16.781
Ctrl MO CO	Clone- Clone	h8b3	10.375	225.996	106.29	1222.175	16.781
Ctrl MO PO	Non Clone- Clone	h1b1	12.914	270.612	105.263	726.72	20.91
Ctrl MO PO	Non Clone- Clone	h1b1	12.914	309.617	106.244	871.77	20.91
Ctrl MO PO	Non Clone- Clone	h1b1	12.914	317.695	116.223	840.557	20.91
Ctrl MO PO	Non Clone- Clone	h1b1	12.914	306.689	119.774	967.444	20.91
Ctrl MO PO	Non Clone- Clone	h1b1	12.914	300.459	127.577	1358.668	20.91
Ctrl MO PO	Non Clone- Clone	h1b1	12.914	285.222	97.534	851.556	20.91
Ctrl MO PO	Non Clone- Clone	h1b1	12.914	268.662	108.078	843.754	20.91
Ctrl MO PO	Non Clone- Clone	h1b1	12.914	254.592	107.807	826.274	20.91
Ctrl MO PO	Non Clone- Clone	h1b1	12.914	233.782	103.004	759.673	20.91
Ctrl MO PO	Non Clone- Clone	h1b1	12.914	208.764	106.026	665.133	20.91
Ctrl MO PO	Non Clone- Clone	h1b1	12.914	190.551	103.377	563.102	20.91
Ctrl MO PO	Non Clone- Clone
Ctrl MO PO	Non Clone- Clone	h1b2	9.186	295.127	111.84	772.347	14.848
Ctrl MO PO	Non Clone- Clone	h1b2	9.186	303.89	118.689	1038.71	14.848
Ctrl MO PO	Non Clone- Clone	h1b2	9.186	288.282	107.064	1061.733	14.848
Ctrl MO PO	Non Clone- Clone	h1b2	9.186	258.923	109.84	985.102	14.848
Ctrl MO PO	Non Clone- Clone	h1b2	9.186	255.362	109.001	926.784	14.848
Ctrl MO PO	Non Clone- Clone	h1b2	9.186	259.27	114.303	975.271	14.848
Ctrl MO PO	Non Clone- Clone	h1b2	9.186	268.423	119.176	959.273	14.848
Ctrl MO PO	Non Clone- Clone	h1b2	9.186	282.554	117.157	1131.152	14.848
Ctrl MO PO	Non Clone- Clone	h1b2	9.186	314.272	113.173	1160.357	14.848
Ctrl MO PO	Non Clone- Clone	h1b2	9.186	335.225	114.112	1185.77	14.848
Ctrl MO PO	Non Clone- Clone	h1b2	9.186	350.164	123.156	1403.315	14.848
Ctrl MO PO	Non Clone- Clone	h1b2	9.186	360.794	130.22	2095.235	14.848
Ctrl MO PO	Non Clone- Clone	h1b2	9.186	360.639	117.884	1533.196	14.848
Ctrl MO PO	Non Clone- Clone
Ctrl MO PO	Non Clone- Clone	h2b1	5.674	364.066	148.04	1033.916	9.137
Ctrl MO PO	Non Clone- Clone	h2b1	5.674	357.449	147.162	945.718	9.137
Ctrl MO PO	Non Clone- Clone	h2b1	5.674	348.955	139.033	782.508	9.137
Ctrl MO PO	Non Clone- Clone	h2b1	5.674	359.411	166.704	858.484	9.137
Ctrl MO PO	Non Clone- Clone	h2b1	5.674	360.577	155.436	930.236	9.137
Ctrl MO PO	Non Clone- Clone	h2b1	5.674	366.127	151.485	1328.589	9.137
Ctrl MO PO	Non Clone- Clone
Ctrl MO PO	Non Clone- Clone	h2b2	3.458	326.065	112.65	1459.973	5.535
Ctrl MO PO	Non Clone- Clone	h2b2	3.458	370.054	136.096	1572.463	5.535
Ctrl MO PO	Non Clone- Clone	h2b2	3.458	367.142	148.378	1475.205	5.535
Ctrl MO PO	Non Clone- Clone	h2b2	3.458	336.808	121.063	1336.317	5.535
Ctrl MO PO	Non Clone- Clone	h2b2	3.458	314.126	114.343	1140.086	5.535
Ctrl MO PO	Non Clone- Clone	h2b2	3.458	316.663	120.496	1228.216	5.535
Ctrl MO PO	Non Clone- Clone	h2b2	3.458	325.363	130.021	1261.511	5.535
Ctrl MO PO	Non Clone- Clone	h2b2	3.458	333.501	137.274	852.919	5.535
Ctrl MO PO	Non Clone- Clone	h2b2	3.458	360.449	139.218	780.847	5.535
Ctrl MO PO	Non Clone- Clone	h2b2	3.458	372.679	152.843	740.74	5.535
Ctrl MO PO	Non Clone- Clone	h2b2	3.458	359.879	145.259	634.253	5.535
Ctrl MO PO	Non Clone- Clone	h3b1	10.429	230.698	104.164	705.238	16.869
Ctrl MO PO	Non Clone- Clone	h3b1	10.429	254.802	107.679	751.697	16.869
Ctrl MO PO	Non Clone- Clone	h3b1	10.429	294.6	103.068	1445.961	16.869
Ctrl MO PO	Non Clone- Clone	h3b1	10.429	286.979	126.217	1368.553	16.869
Ctrl MO PO	Non Clone- Clone	h3b1	10.429	286.876	116.233	1186.158	16.869
Ctrl MO PO	Non Clone- Clone	h3b1	10.375	480.178	119.005	1572.572	16.781
Ctrl MO PO	Non Clone- Clone	h3b1	10.375	568.769	135.299	2223.788	16.781
Ctrl MO PO	Non Clone- Clone	h3b1	10.375	563.791	147.577	2487.583	16.781
Ctrl MO PO	Non Clone- Clone
Ctrl MO PO	Non Clone- Clone	h3b2	6.592	279.784	103.616	942.363	10.631
Ctrl MO PO	Non Clone- Clone	h3b2	6.592	347.485	110.721	1444.772	10.631
Ctrl MO PO	Non Clone- Clone	h3b2	6.592	406.679	105.852	1741.793	10.631
Ctrl MO PO	Non Clone- Clone	h3b2	6.592	460.016	112.89	1824.15	10.631
Ctrl MO PO	Non Clone- Clone	h3b2	6.592	519.71	124.439	1713.162	10.631
Ctrl MO PO	Non Clone- Clone	h3b2	6.592	603.402	139.535	1727.973	10.631
Ctrl MO PO	Non Clone- Clone	h3b2	6.592	576.234	139.011	1934.93	10.631
Ctrl MO PO	Non Clone- Clone
Ctrl MO PO	Non Clone- Clone	h3b3	7.511	233.645	104.04	880.277	12.125
Ctrl MO PO	Non Clone- Clone	h3b3	7.511	287.882	107.606	1489.444	12.125
Ctrl MO PO	Non Clone- Clone	h3b3	7.511	319.432	103.152	2174.602	12.125
Ctrl MO PO	Non Clone- Clone	h3b3	7.511	338.219	118.155	1644.173	12.125
Ctrl MO PO	Non Clone- Clone	h3b3	7.511	353.863	135.286	1573.21	12.125
Ctrl MO PO	Non Clone- Clone	h3b3	7.511	377.476	133.676	1585.98	12.125
Ctrl MO PO	Non Clone- Clone	h3b3	7.511	399.002	150.826	1326.278	12.125
Ctrl MO PO	Non Clone- Clone	h3b3	7.511	395.56	143.021	1206.55	12.125
Ctrl MO PO	Non Clone- Clone
Ctrl MO PO	Non Clone- Clone	h4b1	8.808	415.513	135.205	1186.878	14.233
Ctrl MO PO	Non Clone- Clone	h4b1	8.808	439.537	146.45	1130.962	14.233
Ctrl MO PO	Non Clone- Clone	h4b1	8.808	529.428	170.027	1859.46	14.233
Ctrl MO PO	Non Clone- Clone	h4b1	8.808	627.532	198.649	1716.72	14.233
Ctrl MO PO	Non Clone- Clone	h4b1	8.808	542.566	208.491	1502.718	14.233
Ctrl MO PO	Non Clone- Clone	h4b1	8.808	363.927	159.889	1171.92	14.233
Ctrl MO PO	Non Clone- Clone
Ctrl MO PO	Non Clone- Clone	h4b2	6.754	396.089	133.026	973.381	10.894
Ctrl MO PO	Non Clone- Clone	h4b2	6.754	397.264	147.436	1102.494	10.894
Ctrl MO PO	Non Clone- Clone	h4b2	6.754	379.913	152.22	826.495	10.894
Ctrl MO PO	Non Clone- Clone	h4b2	6.754	446.152	175.703	1247.49	10.894
Ctrl MO PO	Non Clone- Clone	h4b2	6.754	482.781	175.639	1569.816	10.894
Ctrl MO PO	Non Clone- Clone	h4b2	6.754	374.774	174.107	939.348	10.894
Ctrl MO PO	Non Clone- Clone	h4b2	6.754	265.016	140.889	1143.433	10.894
Ctrl MO PO	Non Clone- Clone
Ctrl MO PO	Non Clone- Clone	h4b3	8.375	332.537	123.439	792.464	13.53
Ctrl MO PO	Non Clone- Clone	h4b3	8.375	327.017	133.777	1371.805	13.53
Ctrl MO PO	Non Clone- Clone	h4b3	8.375	329.031	133.604	1977.436	13.53
Ctrl MO PO	Non Clone- Clone	h4b3	8.375	358.717	119.893	1687.33	13.53
Ctrl MO PO	Non Clone- Clone	h4b3	8.375	400.29	150.882	1247.68	13.53
Ctrl MO PO	Non Clone- Clone	h4b3	8.375	435.225	159.694	1199.125	13.53
Ctrl MO PO	Non Clone- Clone	h4b3	8.375	436.018	170.307	1309.295	13.53
Ctrl MO PO	Non Clone- Clone	h5b2	15.508	226.139	99.062	878.048	25.128
Ctrl MO PO	Non Clone- Clone	h5b2	15.508	282.694	107.11	1871.956	25.128
Ctrl MO PO	Non Clone- Clone	h5b2	15.508	307.476	108.06	1984.607	25.128
Ctrl MO PO	Non Clone- Clone	h5b2	15.508	347.376	122.652	1800.899	25.128
Ctrl MO PO	Non Clone- Clone	h5b2	15.508	418.745	151.081	3840.731	25.128
Ctrl MO PO	Non Clone- Clone	h5b2	15.508	448.612	155.588	2570.68	25.128
Ctrl MO PO	Non Clone- Clone
Ctrl MO PO	Non Clone- Clone	h5b3	8.7	244.885	106.619	834.76	14.057
Ctrl MO PO	Non Clone- Clone	h5b3	8.7	297.178	124.176	1032.732	14.057
Ctrl MO PO	Non Clone- Clone	h5b3	8.7	344.318	139.434	1113.333	14.057
Ctrl MO PO	Non Clone- Clone	h5b3	8.7	438.36	147.242	1658.257	14.057
Ctrl MO PO	Non Clone- Clone	h5b3	8.7	563.502	152.514	3502.36	14.057
Ctrl MO PO	Non Clone- Clone
Ctrl MO PO	Non Clone- Clone	h5b4	11.942	247.68	100.456	890.453	19.329
Ctrl MO PO	Non Clone- Clone	h5b4	11.942	283.711	109.365	955.88	19.329
Ctrl MO PO	Non Clone- Clone	h5b4	11.942	328.624	115.571	1353.654	19.329
Ctrl MO PO	Non Clone- Clone	h5b4	11.942	380.496	117.477	1411.321	19.329
Ctrl MO PO	Non Clone- Clone	h5b4	11.942	414.437	129.436	1739.125	19.329
Ctrl MO PO	Non Clone- Clone	h5b4	11.942	436.88	131.661	1993.232	19.329
Ctrl MO PO	Non Clone- Clone	h6b1	10.699	281.159	122.35	696.776	17.308
Ctrl MO PO	Non Clone- Clone	h6b1	10.699	292.979	106.134	838.534	17.308
Ctrl MO PO	Non Clone- Clone	h6b1	10.699	283.124	115.22	841.666	17.308
Ctrl MO PO	Non Clone- Clone	h6b1	11.347	319.051	127.32	1058.02	18.362
Ctrl MO PO	Non Clone- Clone	h6b1	11.347	383.97	127.036	1081.961	18.362
Ctrl MO PO	Non Clone- Clone	h6b1	11.347	476.244	157.385	1604.989	18.362
Ctrl MO PO	Non Clone- Clone	h6b1	11.347	586.277	158.425	2226.569	18.362
Ctrl MO PO	Non Clone- Clone	h6b1	11.347	569.204	164.951	2215.599	18.362
Ctrl MO PO	Non Clone- Clone
Ctrl MO PO	Non Clone- Clone	h6b2	9.348	324.107	108.879	2467.982	15.101
Ctrl MO PO	Non Clone- Clone	h6b2	9.348	392.067	131.396	1932.011	15.101
Ctrl MO PO	Non Clone- Clone	h6b2	9.348	440.538	128.726	1954.689	15.101
Ctrl MO PO	Non Clone- Clone	h6b2	9.348	449.419	137.383	1187.28	15.101
Ctrl MO PO	Non Clone- Clone	h6b2	9.348	438.138	129.301	1174.023	15.101
Ctrl MO PO	Non Clone- Clone	h6b2	9.348	436.957	115.199	1289.358	15.101
Ctrl MO PO	Non Clone- Clone	h6b2	9.348	438.292	118.394	2179.596	15.101
Ctrl MO PO	Non Clone- Clone
Ctrl MO PO	Non Clone- Clone	h6b3	14.427	207.912	96.315	744.346	23.37
Ctrl MO PO	Non Clone- Clone	h6b3	14.427	227.67	104.692	731.803	23.37
Ctrl MO PO	Non Clone- Clone	h6b3	14.265	379.213	111.395	1614.219	23.107
Ctrl MO PO	Non Clone- Clone	h6b3	14.265	354.646	113.319	2531.104	23.107
Ctrl MO PO	Non Clone- Clone	h6b3	14.265	359.696	113.589	1983.559	23.107
Ctrl MO PO	Non Clone- Clone	h6b3	14.265	392.572	112.984	2995.241	23.107
Ctrl MO PO	Non Clone- Clone	h6b3	13.941	601.945	157.18	2581.025	22.58
Ctrl MO PO	Non Clone- Clone	h6b3	13.941	562.66	176.982	2934.188	22.58
Ctrl MO PO	Non Clone- Clone	h6b3	13.941	488.219	122.252	1649.699	22.58
Ctrl MO PO	Non Clone- Clone
Ctrl MO PO	Non Clone- Clone	h6b4	7.673	241.816	92.799	908.259	12.388
Ctrl MO PO	Non Clone- Clone	h6b4	7.673	288.684	108.116	1018.05	12.388
Ctrl MO PO	Non Clone- Clone	h6b4	7.673	337.255	104.731	995.779	12.388
Ctrl MO PO	Non Clone- Clone	h6b4	7.673	360.457	115.678	1259.473	12.388
Ctrl MO PO	Non Clone- Clone	h6b4	7.673	323.557	116.666	794.397	12.388
Ctrl MO PO	Non Clone- Clone	h6b4	7.673	278.51	125.472	725.758	12.388
Ctrl MO PO	Non Clone- Clone	h6b4	7.673	236.593	111.104	531.38	12.388
Ctrl MO PO	Non Clone- Clone	h6b4	7.673	208.652	107.168	478.315	12.388
Ctrl MO PO	Non Clone- Clone
Ctrl MO PO	Non Clone- Clone	h7b1	9.78	183.416	102.808	419.582	15.815
Ctrl MO PO	Non Clone- Clone	h7b1	9.78	191.714	105.265	443.166	15.815
Ctrl MO PO	Non Clone- Clone	h7b1	9.78	199.659	105.554	550.505	15.815
Ctrl MO PO	Non Clone- Clone	h7b1	9.78	201.82	107.22	571.091	15.815
Ctrl MO PO	Non Clone- Clone	h7b1	9.78	214.151	112.312	640.504	15.815
Ctrl MO PO	Non Clone- Clone	h7b1	9.78	216.454	112.134	593.111	15.815
Ctrl MO PO	Non Clone- Clone	h7b1	9.78	234.592	118.833	760.701	15.815
Ctrl MO PO	Non Clone- Clone	h7b1	9.78	249.934	122.471	638.04	15.815
Ctrl MO PO	Non Clone- Clone	h7b1	9.78	267.798	120.19	1111.481	15.815
Ctrl MO PO	Non Clone- Clone	h7b1	9.78	313.337	125.838	1612.9	15.815
Ctrl MO PO	Non Clone- Clone	h7b1	9.78	352.64	135.211	1829.235	15.815
Ctrl MO PO	Non Clone- Clone
Ctrl MO PO	Non Clone- Clone	h7b2	2.215	246.237	129.345	747.333	3.511
Ctrl MO PO	Non Clone- Clone	h7b2	2.215	278.792	130.792	1025.046	3.511
Ctrl MO PO	Non Clone- Clone	h7b2	2.215	285.756	125.071	972.766	3.511
Ctrl MO PO	Non Clone- Clone	h7b2	2.215	281.311	110.723	832.31	3.511
Ctrl MO PO	Non Clone- Clone	h7b2	2.215	270.27	125.224	717.754	3.511
Ctrl MO PO	Non Clone- Clone	h7b2	2.215	265.502	128.164	696.113	3.511
Ctrl MO PO	Non Clone- Clone
Ctrl MO PO	Non Clone- Clone	h7b3	8.105	215.323	103.907	712.859	13.091
Ctrl MO PO	Non Clone- Clone	h7b3	8.105	233.73	103.664	979.58	13.091
Ctrl MO PO	Non Clone- Clone	h7b3	8.105	242.255	117.001	950.342	13.091
Ctrl MO PO	Non Clone- Clone	h7b3	8.105	256.836	115.472	825.175	13.091
Ctrl MO PO	Non Clone- Clone	h7b3	8.105	265.124	122.008	906.488	13.091
Ctrl MO PO	Non Clone- Clone	h7b3	8.105	280.909	119.21	801.766	13.091
Ctrl MO PO	Non Clone- Clone	h7b3	8.105	299.315	121.297	988.435	13.091
Ctrl MO PO	Non Clone- Clone	h7b3	8.105	298.116	124.893	731.466	13.091
Ctrl MO PO	Non Clone- Clone	h7b3	8.105	310.147	133.266	783.066	13.091
Ctrl MO PO	Non Clone- Clone	h7b3	8.105	321.923	124.227	805.405	13.091
Ctrl MO PO	Non Clone- Clone
Ctrl MO PO	Non Clone- Clone	h7b4	9.348	291.336	122.007	1222.686	15.112
Ctrl MO PO	Non Clone- Clone	h7b4	9.348	314.896	130.022	1145.374	15.112
Ctrl MO PO	Non Clone- Clone	h7b4	9.348	334.62	132.205	1023.706	15.112
Ctrl MO PO	Non Clone- Clone	h7b4	9.348	357.189	134.965	906.803	15.112
Ctrl MO PO	Non Clone- Clone	h7b4	9.348	384.279	145.916	976.788	15.112
Ctrl MO PO	Non Clone- Clone	h7b4	9.348	391.667	144.317	1011.485	15.112
Ctrl MO PO	Non Clone- Clone	h7b4	9.348	411.026	142.67	1317.266	15.112
Ctrl MO PO	Non Clone- Clone
Ctrl MO PO	Non Clone- Clone	h8b1	8.862	163.835	103.219	440.52	14.321
Ctrl MO PO	Non Clone- Clone	h8b1	8.862	199.924	102.137	719.758	14.321
Ctrl MO PO	Non Clone- Clone	h8b1	8.862	234.562	107.386	1054.755	14.321
Ctrl MO PO	Non Clone- Clone	h8b1	8.862	248.535	105.46	975.793	14.321
Ctrl MO PO	Non Clone- Clone	h8b1	8.862	256.482	117.527	978.407	14.321
Ctrl MO PO	Non Clone- Clone	h8b1	8.862	297.893	131.435	848.909	14.321
Ctrl MO PO	Non Clone- Clone	h8b1	8.862	328.095	138.039	907.941	14.321
Ctrl MO PO	Non Clone- Clone	h8b1	8.862	339.158	136.334	1028.938	14.321
Ctrl MO PO	Non Clone- Clone	h8b1	8.862	332.76	137.753	1091.879	14.321
Ctrl MO PO	Non Clone- Clone
Ctrl MO PO	Non Clone- Clone	h8b2	8.213	266.728	103.79	812.401	13.267
Ctrl MO PO	Non Clone- Clone	h8b2	8.213	302.602	121.459	1453.015	13.267
Ctrl MO PO	Non Clone- Clone	h8b2	8.213	301.416	122.215	1136.931	13.267
Ctrl MO PO	Non Clone- Clone	h8b2	8.213	307.154	134.548	962.161	13.267
Ctrl MO PO	Non Clone- Clone	h8b2	8.213	326.16	127.139	822.072	13.267
Ctrl MO PO	Non Clone- Clone	h8b2	8.213	364.842	132.173	985.843	13.267
Ctrl MO PO	Non Clone- Clone	h8b2	8.213	438.876	159.473	1261.332	13.267
Ctrl MO PO	Non Clone- Clone	h8b2	8.213	484.391	161.288	1542.276	13.267
Ctrl MO PO	Non Clone- Clone	h8b2	8.213	449.526	145.301	1791.756	13.267
Ctrl MO PO	Non Clone- Clone
Ctrl MO PO	Non Clone- Clone	h8b3	8.916	199.419	98.394	742.833	14.398
Ctrl MO PO	Non Clone- Clone	h8b3	8.916	258.9	102.792	1429.636	14.398
Ctrl MO PO	Non Clone- Clone	h8b3	8.916	303.756	110.593	1741.403	14.398
Ctrl MO PO	Non Clone- Clone	h8b3	8.916	318.082	107.122	1720.45	14.398
Ctrl MO PO	Non Clone- Clone	h8b3	8.916	347.684	117.483	1896.237	14.398
Ctrl MO PO	Non Clone- Clone	h8b3	8.916	355.318	122.264	1602.384	14.398
Ctrl MO PO	Non Clone- Clone	h8b3	8.916	344.478	140.452	1131.395	14.398
Ctrl MO PO	Non Clone- Clone	h8b3	8.916	359.323	138.245	1322.831	14.398
Ctrl MO NO	Non Clone- Non Clone	h1b1	4.215	216.113	97.8	460.529	6.765
Ctrl MO NO	Non Clone- Non Clone	h1b1	4.215	212.603	101.551	517.966	6.765
Ctrl MO NO	Non Clone- Non Clone	h1b1	4.215	197.297	101.149	511.234	6.765
Ctrl MO NO	Non Clone- Non Clone	h1b1	4.215	199.822	99.225	444.315	6.765
Ctrl MO NO	Non Clone- Non Clone	h1b1	4.215	203.439	100.202	476.159	6.765
Ctrl MO NO	Non Clone- Non Clone	h1b1	4.215	214.79	100.46	529.56	6.765
Ctrl MO NO	Non Clone- Non Clone	h1b1	4.215	226.799	99.122	698.611	6.765
Ctrl MO NO	Non Clone- Non Clone	h1b1	4.215	251.162	100.063	780.211	6.765
Ctrl MO NO	Non Clone- Non Clone
Ctrl MO NO	Non Clone- Non Clone	h1b2	10.321	221.272	100.544	647.624	16.693
Ctrl MO NO	Non Clone- Non Clone	h1b2	10.321	248.058	103.395	836.533	16.693
Ctrl MO NO	Non Clone- Non Clone	h1b2	10.321	262.384	106.589	1042.967	16.693
Ctrl MO NO	Non Clone- Non Clone	h1b2	10.321	273.534	106.417	1385.735	16.693
Ctrl MO NO	Non Clone- Non Clone	h1b2	10.321	272.216	107.19	1275.692	16.693
Ctrl MO NO	Non Clone- Non Clone	h1b2	10.321	269.19	112.43	1086.735	16.693
Ctrl MO NO	Non Clone- Non Clone	h1b2	10.321	267.415	106.37	1020.918	16.693
Ctrl MO NO	Non Clone- Non Clone	h1b2	10.321	269.428	113.696	992.768	16.693
Ctrl MO NO	Non Clone- Non Clone	h1b2	10.321	286.225	113.608	1430.521	16.693
Ctrl MO NO	Non Clone- Non Clone	h1b2	10.321	310.781	104.529	1760.161	16.693
Ctrl MO NO	Non Clone- Non Clone	h1b2	10.321	342.981	117.074	2634.215	16.693
Ctrl MO NO	Non Clone- Non Clone	h1b2	10.321	359.473	116.529	3195.488	16.693
Ctrl MO NO	Non Clone- Non Clone
Ctrl MO NO	Non Clone- Non Clone	h1b3	9.294	187.955	101.286	514.716	15.024
Ctrl MO NO	Non Clone- Non Clone	h1b3	9.294	196.26	97.562	561.62	15.024
Ctrl MO NO	Non Clone- Non Clone	h1b3	9.294	197.318	100.966	559.736	15.024
Ctrl MO NO	Non Clone- Non Clone	h1b3	9.294	199.229	105.313	693.035	15.024
Ctrl MO NO	Non Clone- Non Clone	h1b3	9.294	196.061	101.773	709.014	15.024
Ctrl MO NO	Non Clone- Non Clone	h1b3	9.294	192.427	104.517	629.208	15.024
Ctrl MO NO	Non Clone- Non Clone	h1b3	9.294	185.546	101.738	576.842	15.024
Ctrl MO NO	Non Clone- Non Clone	h1b3	9.294	182.528	102.409	766.684	15.024
Ctrl MO NO	Non Clone- Non Clone	h1b3	9.294	179.157	104.194	479.13	15.024
Ctrl MO NO	Non Clone- Non Clone	h1b3	9.294	179.756	100.124	587.826	15.024
Ctrl MO NO	Non Clone- Non Clone	h1b3	9.294	194.221	101.128	620.606	15.024
Ctrl MO NO	Non Clone- Non Clone	h1b3	9.294	209.535	105.732	762.94	15.024
Ctrl MO NO	Non Clone- Non Clone	h1b3	9.294	232.674	105.375	1294.387	15.024
Ctrl MO NO	Non Clone- Non Clone	h1b3	9.294	247.952	106.11	1019.259	15.024
Ctrl MO NO	Non Clone- Non Clone	h1b3	9.294	246.267	106.102	1176.132	15.024
Ctrl MO NO	Non Clone- Non Clone	h1b3	9.294	234.02	102.967	927.748	15.024
Ctrl MO NO	Non Clone- Non Clone
Ctrl MO NO	Non Clone- Non Clone	h1b4	9.186	270.196	111.363	1011.55	14.848
Ctrl MO NO	Non Clone- Non Clone	h1b4	9.186	279.163	113.129	997.249	14.848
Ctrl MO NO	Non Clone- Non Clone	h1b4	9.186	278.401	114.235	1107.72	14.848
Ctrl MO NO	Non Clone- Non Clone	h1b4	9.186	284.005	113.681	1130.74	14.848
Ctrl MO NO	Non Clone- Non Clone	h1b4	9.186	290.631	115.669	1066.453	14.848
Ctrl MO NO	Non Clone- Non Clone	h1b4	9.186	309.608	119.149	1293.797	14.848
Ctrl MO NO	Non Clone- Non Clone	h1b4	9.186	332.792	119.45	1647.737	14.848
Ctrl MO NO	Non Clone- Non Clone	h1b4	9.186	338.215	119.581	1884.708	14.848
Ctrl MO NO	Non Clone- Non Clone	h1b4	9.186	332.515	127.076	2547.036	14.848
Ctrl MO NO	Non Clone- Non Clone	h1b4	9.186	321.362	134.153	2894.343	14.848
Ctrl MO NO	Non Clone- Non Clone	h1b4	9.186	319.815	128.299	1055.287	14.848
Ctrl MO NO	Non Clone- Non Clone
Ctrl MO NO	Non Clone- Non Clone	h1b5	9.564	302.834	111.414	1150.099	15.463
Ctrl MO NO	Non Clone- Non Clone	h1b5	9.564	343.769	120.715	1603.261	15.463
Ctrl MO NO	Non Clone- Non Clone	h1b5	9.564	384.416	133.94	1536.76	15.463
Ctrl MO NO	Non Clone- Non Clone	h1b5	9.564	389.376	149.38	1360.661	15.463
Ctrl MO NO	Non Clone- Non Clone	h1b5	9.564	368.645	124.848	1175.938	15.463
Ctrl MO NO	Non Clone- Non Clone	h1b5	9.564	363.439	143.181	1090.339	15.463
Ctrl MO NO	Non Clone- Non Clone	h1b5	9.564	368.531	130.144	1440.846	15.463
Ctrl MO NO	Non Clone- Non Clone	h1b5	9.564	376.747	130.404	1995.457	15.463
Ctrl MO NO	Non Clone- Non Clone	h1b5	9.564	376.999	143.751	2824.559	15.463
Ctrl MO NO	Non Clone- Non Clone
Ctrl MO NO	Non Clone- Non Clone	h1b6	12.428	337.104	117.95	1358.655	20.12
Ctrl MO NO	Non Clone- Non Clone	h1b6	12.428	387.076	129.033	1900.878	20.12
Ctrl MO NO	Non Clone- Non Clone	h1b6	12.428	425.227	132.991	2354.482	20.12
Ctrl MO NO	Non Clone- Non Clone	h1b6	12.428	439.54	148.122	2185.206	20.12
Ctrl MO NO	Non Clone- Non Clone	h1b6	12.428	449.61	164.315	1829.848	20.12
Ctrl MO NO	Non Clone- Non Clone	h1b6	12.428	438.545	141.124	2166.946	20.12
Ctrl MO NO	Non Clone- Non Clone	h1b6	12.428	416.303	131.955	1464.67	20.12
Ctrl MO NO	Non Clone- Non Clone	h2b1	4.755	303.393	106.784	1265.71	7.644
Ctrl MO NO	Non Clone- Non Clone	h2b1	4.755	323.508	106.857	1317.459	7.644
Ctrl MO NO	Non Clone- Non Clone	h2b1	4.755	306.905	121.751	736.423	7.644
Ctrl MO NO	Non Clone- Non Clone	h2b1	4.755	279.912	128.282	679.966	7.644
Ctrl MO NO	Non Clone- Non Clone	h2b1	4.755	282.286	133.489	703.532	7.644
Ctrl MO NO	Non Clone- Non Clone	h2b1	4.755	296.625	150.615	718.169	7.644
Ctrl MO NO	Non Clone- Non Clone	h2b1	4.755	306.824	154.48	966.75	7.644
Ctrl MO NO	Non Clone- Non Clone	h2b1	4.755	314.383	148.516	917.051	7.644
Ctrl MO NO	Non Clone- Non Clone	h2b1	4.755	301.474	136.108	769.978	7.644
Ctrl MO NO	Non Clone- Non Clone
Ctrl MO NO	Non Clone- Non Clone	h2b2	5.836	299.894	111.158	807.668	9.401
Ctrl MO NO	Non Clone- Non Clone	h2b2	5.836	351.204	111.133	1560.549	9.401
Ctrl MO NO	Non Clone- Non Clone	h2b2	5.836	343.556	125.485	1985.217	9.401
Ctrl MO NO	Non Clone- Non Clone	h2b2	5.836	307.016	123.639	1832.358	9.401
Ctrl MO NO	Non Clone- Non Clone	h2b2	5.944	503.006	176.431	2114.747	9.577
Ctrl MO NO	Non Clone- Non Clone	h2b2	5.944	559.434	176.893	1982.108	9.577
Ctrl MO NO	Non Clone- Non Clone	h2b2	5.944	563.201	170.685	1487.503	9.577
Ctrl MO NO	Non Clone- Non Clone	h2b2	5.944	542.098	146.398	1685.248	9.577
Ctrl MO NO	Non Clone- Non Clone	h2b2	5.944	527.854	159.945	1587.27	9.577
Ctrl MO NO	Non Clone- Non Clone
Ctrl MO NO	Non Clone- Non Clone	h2b3	10.266	321.641	117.199	824.957	16.605
Ctrl MO NO	Non Clone- Non Clone	h2b3	10.266	413.775	120.805	1292.64	16.605
Ctrl MO NO	Non Clone- Non Clone	h2b3	10.266	448.662	129.732	1541.167	16.605
Ctrl MO NO	Non Clone- Non Clone	h2b3	10.266	416.233	132.897	1358.516	16.605
Ctrl MO NO	Non Clone- Non Clone	h2b3	10.266	347.758	139.702	1261.815	16.605
Ctrl MO NO	Non Clone- Non Clone	h2b3	10.266	360.139	136.872	1339.81	16.605
Ctrl MO NO	Non Clone- Non Clone	h2b3	10.266	377.577	143.104	917.579	16.605
Ctrl MO NO	Non Clone- Non Clone	h2b3	10.266	393.477	156.943	1122.842	16.605
Ctrl MO NO	Non Clone- Non Clone
Ctrl MO NO	Non Clone- Non Clone	h2b4	9.51	286.905	122.857	803.939	15.375
Ctrl MO NO	Non Clone- Non Clone	h2b4	9.51	381.107	125.705	1709.829	15.375
Ctrl MO NO	Non Clone- Non Clone	h2b4	9.51	464.441	154.04	2244.678	15.375
Ctrl MO NO	Non Clone- Non Clone	h2b4	9.51	478.259	133.295	2301.642	15.375
Ctrl MO NO	Non Clone- Non Clone	h2b4	9.51	487.773	134.494	2331.342	15.375
Ctrl MO NO	Non Clone- Non Clone	h2b4	9.51	456.969	139.403	2118.552	15.375
Ctrl MO NO	Non Clone- Non Clone	h2b4	9.51	379.516	152.375	1112.381	15.375
Ctrl MO NO	Non Clone- Non Clone	h2b4	9.51	329.914	148.343	1139.66	15.375
Ctrl MO NO	Non Clone- Non Clone
Ctrl MO NO	Non Clone- Non Clone	h2b5	6.862	429.214	160.517	1417.771	11.07
Ctrl MO NO	Non Clone- Non Clone	h2b5	6.862	433.113	151.709	1228.117	11.07
Ctrl MO NO	Non Clone- Non Clone	h2b5	6.862	404.05	136.162	1276.102	11.07
Ctrl MO NO	Non Clone- Non Clone	h2b5	6.862	383.478	118.869	1623.674	11.07
Ctrl MO NO	Non Clone- Non Clone	h2b5	6.862	370.544	114.451	1717.863	11.07
Ctrl MO NO	Non Clone- Non Clone
Ctrl MO NO	Non Clone- Non Clone	h2b6	7.565	244.553	110.391	965.931	12.212
Ctrl MO NO	Non Clone- Non Clone	h2b6	7.565	336.447	111.257	1728.898	12.212
Ctrl MO NO	Non Clone- Non Clone	h2b6	7.565	408.786	134.368	2016.377	12.212
Ctrl MO NO	Non Clone- Non Clone	h2b6	7.565	435.648	120.411	2025.094	12.212
Ctrl MO NO	Non Clone- Non Clone	h2b6	7.565	449.023	146.553	1381.273	12.212
Ctrl MO NO	Non Clone- Non Clone	h2b6	7.565	425.231	139.463	1040.327	12.212
Ctrl MO NO	Non Clone- Non Clone	h2b6	7.565	383.391	154.986	1133.943	12.212
Ctrl MO NO	Non Clone- Non Clone	h2b6	7.565	327.745	123.678	1151.736	12.212
Ctrl MO NO	Non Clone- Non Clone	h3b1	11.023	203.542	101.573	548.633	17.835
Ctrl MO NO	Non Clone- Non Clone	h3b1	11.023	227.338	103.58	642.29	17.835
Ctrl MO NO	Non Clone- Non Clone	h3b1	11.023	291.031	96.713	1275.339	17.835
Ctrl MO NO	Non Clone- Non Clone	h3b1	11.023	335.009	106.813	1568.244	17.835
Ctrl MO NO	Non Clone- Non Clone	h3b1	11.023	355.539	113.093	1990.142	17.835
Ctrl MO NO	Non Clone- Non Clone	h3b1	11.023	361.078	125.258	1611.177	17.835
Ctrl MO NO	Non Clone- Non Clone	h3b1	11.023	351.435	125.601	1142.771	17.835
Ctrl MO NO	Non Clone- Non Clone	h3b1	11.023	357.257	140.457	1726.028	17.835
Ctrl MO NO	Non Clone- Non Clone	h3b1	11.023	338.4	137.985	1758.867	17.835
Ctrl MO NO	Non Clone- Non Clone
Ctrl MO NO	Non Clone- Non Clone	h3b2	15.13	222.672	106.11	871.673	24.513
Ctrl MO NO	Non Clone- Non Clone	h3b2	15.13	283.919	103.112	1373.701	24.513
Ctrl MO NO	Non Clone- Non Clone	h3b2	15.13	311.403	118.743	1506.498	24.513
Ctrl MO NO	Non Clone- Non Clone	h3b2	15.13	325.271	133.625	1232.544	24.513
Ctrl MO NO	Non Clone- Non Clone	h3b2	15.13	348.424	147.359	1034.323	24.513
Ctrl MO NO	Non Clone- Non Clone	h3b2	15.13	382.687	122.035	1283.97	24.513
Ctrl MO NO	Non Clone- Non Clone	h3b2	15.13	404.564	118.829	1687.502	24.513
Ctrl MO NO	Non Clone- Non Clone	h3b2	15.13	373.925	114.334	2199.067	24.513
Ctrl MO NO	Non Clone- Non Clone
Ctrl MO NO	Non Clone- Non Clone	h3b3	16.805	220.616	103.819	643.079	27.236
Ctrl MO NO	Non Clone- Non Clone	h3b3	16.805	275.816	110.178	1138.232	27.236
Ctrl MO NO	Non Clone- Non Clone	h3b3	16.805	318.742	117.893	1755.496	27.236
Ctrl MO NO	Non Clone- Non Clone	h3b3	16.805	349.132	132.797	1877.296	27.236
Ctrl MO NO	Non Clone- Non Clone	h3b3	16.805	379.543	123.231	1803.29	27.236
Ctrl MO NO	Non Clone- Non Clone	h3b3	16.805	423.184	132.647	1545.798	27.236
Ctrl MO NO	Non Clone- Non Clone	h3b3	16.805	425.12	146.557	2189.712	27.236
Ctrl MO NO	Non Clone- Non Clone	h3b3	16.805	375.45	140.097	1555.688	27.236
Ctrl MO NO	Non Clone- Non Clone	h3b3	16.805	237.989	103.346	780.343	27.236
Ctrl MO NO	Non Clone- Non Clone
Ctrl MO NO	Non Clone- Non Clone	h3b4	15.832	218.589	102.896	529.416	25.655
Ctrl MO NO	Non Clone- Non Clone	h3b4	15.832	244.63	102.126	573.215	25.655
Ctrl MO NO	Non Clone- Non Clone	h3b4	15.832	311.128	109.127	957.308	25.655
Ctrl MO NO	Non Clone- Non Clone	h3b4	15.832	344.316	115.772	1588.555	25.655
Ctrl MO NO	Non Clone- Non Clone	h3b4	15.832	356.97	119.024	1718.805	25.655
Ctrl MO NO	Non Clone- Non Clone	h3b4	15.832	344.734	126.748	1437.828	25.655
Ctrl MO NO	Non Clone- Non Clone	h3b4	15.832	306.947	124.079	1358.223	25.655
Ctrl MO NO	Non Clone- Non Clone	h3b4	15.832	294.901	123.361	1170.932	25.655
Ctrl MO NO	Non Clone- Non Clone	h3b4	15.832	293.162	119.436	1277.649	25.655
Ctrl MO NO	Non Clone- Non Clone	h3b4	15.832	276.364	111.003	1751.007	25.655
Ctrl MO NO	Non Clone- Non Clone
Ctrl MO NO	Non Clone- Non Clone	h3b5	7.727	264.708	104.289	1079.071	12.476
Ctrl MO NO	Non Clone- Non Clone	h3b5	7.727	339.184	108.515	1647.127	12.476
Ctrl MO NO	Non Clone- Non Clone	h3b5	7.727	377.409	112.088	2246.954	12.476
Ctrl MO NO	Non Clone- Non Clone	h3b5	7.727	395.448	119.077	2214.701	12.476
Ctrl MO NO	Non Clone- Non Clone	h3b5	7.727	406.013	121.058	1863.687	12.476
Ctrl MO NO	Non Clone- Non Clone	h3b5	7.727	386.373	116.724	1365.38	12.476
Ctrl MO NO	Non Clone- Non Clone	h3b5	7.727	362.011	122.479	1393.788	12.476
Ctrl MO NO	Non Clone- Non Clone	h3b5	7.727	330.768	114.415	1415.943	12.476
Ctrl MO NO	Non Clone- Non Clone	h3b5	7.727	315.85	122.248	1969.361	12.476
Ctrl MO NO	Non Clone- Non Clone	h3b5	7.727	318.698	126.229	1294.092	12.476
Ctrl MO NO	Non Clone- Non Clone
Ctrl MO NO	Non Clone- Non Clone	h4b1	12.86	310.909	114.528	1226.77	20.823
Ctrl MO NO	Non Clone- Non Clone	h4b1	12.86	334.237	116.979	1326.791	20.823
Ctrl MO NO	Non Clone- Non Clone	h4b1	12.86	364.847	123.727	1437.42	20.823
Ctrl MO NO	Non Clone- Non Clone	h4b1	12.86	393.586	136.525	1351.022	20.823
Ctrl MO NO	Non Clone- Non Clone	h4b1	12.86	407.659	127.01	1076.803	20.823
Ctrl MO NO	Non Clone- Non Clone	h4b1	12.86	433.117	123.436	1605.232	20.823
Ctrl MO NO	Non Clone- Non Clone
Ctrl MO NO	Non Clone- Non Clone	h4b2	9.51	316.234	122.059	977.712	15.375
Ctrl MO NO	Non Clone- Non Clone	h4b2	9.51	432.636	126.021	1986.465	15.375
Ctrl MO NO	Non Clone- Non Clone	h4b2	9.51	429.337	134.608	1871.45	15.375
Ctrl MO NO	Non Clone- Non Clone	h4b2	9.51	438.556	137.194	1391.464	15.375
Ctrl MO NO	Non Clone- Non Clone	h4b2	9.51	454.399	149.626	2080.177	15.375
Ctrl MO NO	Non Clone- Non Clone	h4b2	9.51	466.725	168.171	1621.491	15.375
Ctrl MO NO	Non Clone- Non Clone	h4b2	9.51	499.998	169.049	1262.078	15.375
Ctrl MO NO	Non Clone- Non Clone
Ctrl MO NO	Non Clone- Non Clone	h4b3	8.7	280.395	127.404	649.047	14.057
Ctrl MO NO	Non Clone- Non Clone	h4b3	8.7	401.85	136.931	1311.227	14.057
Ctrl MO NO	Non Clone- Non Clone	h4b3	8.7	415.761	174.764	1302.945	14.057
Ctrl MO NO	Non Clone- Non Clone	h4b3	8.7	385.178	156.621	1575.741	14.057
Ctrl MO NO	Non Clone- Non Clone	h4b3	8.7	362.066	156.248	2073.861	14.057
Ctrl MO NO	Non Clone- Non Clone	h4b3	8.7	377.359	170.618	2175.007	14.057
Ctrl MO NO	Non Clone- Non Clone	h4b3	8.7	411.306	144.914	2152.737	14.057
Ctrl MO NO	Non Clone- Non Clone
Ctrl MO NO	Non Clone- Non Clone	h4b4	8.808	289.22	117.327	1023.76	14.233
Ctrl MO NO	Non Clone- Non Clone	h4b4	8.808	399.175	120.183	1934.096	14.233
Ctrl MO NO	Non Clone- Non Clone	h4b4	8.808	422.92	142.21	2320.444	14.233
Ctrl MO NO	Non Clone- Non Clone	h4b4	8.808	447.599	161.707	2515.487	14.233
Ctrl MO NO	Non Clone- Non Clone	h4b4	8.808	456.269	171.655	1935.449	14.233
Ctrl MO NO	Non Clone- Non Clone	h4b4	8.808	474.421	180.858	1270.359	14.233
Ctrl MO NO	Non Clone- Non Clone	h4b4	8.808	526.623	202.588	2112.139	14.233
Ctrl MO NO	Non Clone- Non Clone
Ctrl MO NO	Non Clone- Non Clone	h4b5	9.996	369.15	107.82	1551.307	16.166
Ctrl MO NO	Non Clone- Non Clone	h4b5	9.996	361.824	111.539	1835.996	16.166
Ctrl MO NO	Non Clone- Non Clone	h4b5	9.996	329.885	119.05	1605.142	16.166
Ctrl MO NO	Non Clone- Non Clone	h4b5	9.996	321.674	126.77	1148.93	16.166
Ctrl MO NO	Non Clone- Non Clone	h4b5	9.996	308.733	134.166	1081.524	16.166
Ctrl MO NO	Non Clone- Non Clone	h4b5	9.996	304.973	148.144	1172.799	16.166
Ctrl MO NO	Non Clone- Non Clone	h4b5	9.996	317.385	139.078	903.321	16.166
Ctrl MO NO	Non Clone- Non Clone
Ctrl MO NO	Non Clone- Non Clone	h4b6	8.321	303.633	136.037	1296.193	13.442
Ctrl MO NO	Non Clone- Non Clone	h4b6	8.321	355.449	163.779	1603.107	13.442
Ctrl MO NO	Non Clone- Non Clone	h4b6	8.321	386.283	149.646	1166.041	13.442
Ctrl MO NO	Non Clone- Non Clone	h4b6	8.321	386.92	158.076	1410.877	13.442
Ctrl MO NO	Non Clone- Non Clone	h4b6	8.321	387.427	143.908	1120.693	13.442
Ctrl MO NO	Non Clone- Non Clone	h4b6	8.321	373.873	147.667	1562.984	13.442
Ctrl MO NO	Non Clone- Non Clone
Ctrl MO NO	Non Clone- Non Clone	h4b7	7.997	348.51	105.721	2283.454	12.915
Ctrl MO NO	Non Clone- Non Clone	h4b7	7.997	384.194	118.616	2580.54	12.915
Ctrl MO NO	Non Clone- Non Clone	h4b7	7.997	413.202	138.904	2826.635	12.915
Ctrl MO NO	Non Clone- Non Clone	h4b7	7.997	472.645	152.635	2081.816	12.915
Ctrl MO NO	Non Clone- Non Clone	h4b7	7.997	592.818	149.119	2156.962	12.915
Ctrl MO NO	Non Clone- Non Clone	h4b7	7.997	601.881	160.16	1679.706	12.915
Ctrl MO NO	Non Clone- Non Clone	h4b7	8.537	667.966	265.216	1691.752	13.794
Ctrl MO NO	Non Clone- Non Clone	h5b1	10.158	325.63	116.3	906.945	16.43
Ctrl MO NO	Non Clone- Non Clone	h5b1	10.158	345.935	123.154	1278.594	16.43
Ctrl MO NO	Non Clone- Non Clone	h5b1	10.158	360.34	124.647	2562.847	16.43
Ctrl MO NO	Non Clone- Non Clone	h5b1	10.158	416.458	144.725	3907.896	16.43
Ctrl MO NO	Non Clone- Non Clone	h5b1	10.158	441.263	162.558	2013.353	16.43
Ctrl MO NO	Non Clone- Non Clone	h5b1	10.158	422.57	159.742	1429.451	16.43
Ctrl MO NO	Non Clone- Non Clone
Ctrl MO NO	Non Clone- Non Clone	h5b2	6.16	242.887	102.836	634.121	9.928
Ctrl MO NO	Non Clone- Non Clone	h5b2	6.16	331.793	115.529	1103.502	9.928
Ctrl MO NO	Non Clone- Non Clone	h5b2	6.16	425.616	120.086	1155.363	9.928
Ctrl MO NO	Non Clone- Non Clone	h5b2	6.16	426.256	125.907	1130.32	9.928
Ctrl MO NO	Non Clone- Non Clone	h5b2	6.16	329.284	126.651	801.326	9.928
Ctrl MO NO	Non Clone- Non Clone
Ctrl MO NO	Non Clone- Non Clone	h5b3	11.779	341.417	125.343	960.935	19.065
Ctrl MO NO	Non Clone- Non Clone	h5b3	11.779	441.742	133.301	1345.929	19.065
Ctrl MO NO	Non Clone- Non Clone	h5b3	11.779	541.395	165.862	2264.793	19.065
Ctrl MO NO	Non Clone- Non Clone	h5b3	11.779	479.821	155.117	1709.585	19.065
Ctrl MO NO	Non Clone- Non Clone	h5b3	11.779	325.641	127.652	854.999	19.065
Ctrl MO NO	Non Clone- Non Clone
Ctrl MO NO	Non Clone- Non Clone	h5b4	8.97	301.347	116.652	719.583	14.497
Ctrl MO NO	Non Clone- Non Clone	h5b4	8.97	355.831	149.5	810.434	14.497
Ctrl MO NO	Non Clone- Non Clone	h5b4	8.97	435.416	171.405	1172.109	14.497
Ctrl MO NO	Non Clone- Non Clone	h5b4	8.97	517.152	155.652	1752.031	14.497
Ctrl MO NO	Non Clone- Non Clone	h5b4	8.97	528.107	173.309	2313.002	14.497
Ctrl MO NO	Non Clone- Non Clone
Ctrl MO NO	Non Clone- Non Clone	h5b5	12.482	228.499	100.622	805.295	20.207
Ctrl MO NO	Non Clone- Non Clone	h5b5	12.482	265.939	111.766	736.509	20.207
Ctrl MO NO	Non Clone- Non Clone	h5b5	12.482	272.725	108.08	755.457	20.207
Ctrl MO NO	Non Clone- Non Clone	h5b5	12.482	292.361	116.553	919.293	20.207
Ctrl MO NO	Non Clone- Non Clone	h5b5	12.482	315.28	110.536	1379.977	20.207
Ctrl MO NO	Non Clone- Non Clone	h5b5	12.482	336.794	129.338	1374.205	20.207
Ctrl MO NO	Non Clone- Non Clone	h5b5	12.482	336.947	132.083	1652.921	20.207
Ctrl MO NO	Non Clone- Non Clone
Ctrl MO NO	Non Clone- Non Clone	h5b6	5.025	311.995	114.071	1329.786	8.083
Ctrl MO NO	Non Clone- Non Clone	h5b6	5.025	387.897	122.831	2023.91	8.083
Ctrl MO NO	Non Clone- Non Clone	h5b6	5.025	415.498	147.066	1275.569	8.083
Ctrl MO NO	Non Clone- Non Clone	h5b6	5.025	453.772	139.888	1848.316	8.083
Ctrl MO NO	Non Clone- Non Clone	h5b6	5.025	482.177	153.009	2839.708	8.083
Ctrl MO NO	Non Clone- Non Clone	h5b6	5.025	451.676	178.522	1968.127	8.083
Ctrl MO NO	Non Clone- Non Clone	h5b6	5.025	438.535	146.604	2515.708	8.083
Ctrl MO NO	Non Clone- Non Clone
Ctrl MO NO	Non Clone- Non Clone	h5b7	8.916	340.395	129.297	1062.78	14.409
Ctrl MO NO	Non Clone- Non Clone	h5b7	8.916	390.191	145.38	1494.249	14.409
Ctrl MO NO	Non Clone- Non Clone	h5b7	8.916	433.849	135.175	1300.132	14.409
Ctrl MO NO	Non Clone- Non Clone	h5b7	8.916	440.767	140.078	1034.045	14.409
Ctrl MO NO	Non Clone- Non Clone	h5b7	8.916	425.57	156.609	1156.486	14.409
Ctrl MO NO	Non Clone- Non Clone	h5b7	8.916	389.801	139.368	2157.243	14.409
Ctrl MO NO	Non Clone- Non Clone	h6b1	12.806	480.781	135.546	2343.808	20.735
Ctrl MO NO	Non Clone- Non Clone	h6b1	12.806	496.61	131.235	1816.168	20.735
Ctrl MO NO	Non Clone- Non Clone	h6b1	12.806	502.708	153.339	1855.018	20.735
Ctrl MO NO	Non Clone- Non Clone	h6b1	12.806	497.727	166.336	1563.195	20.735
Ctrl MO NO	Non Clone- Non Clone	h6b1	12.806	535.392	181.072	2447.197	20.735
Ctrl MO NO	Non Clone- Non Clone	h6b1	12.806	579.792	195.318	2754.759	20.735
Ctrl MO NO	Non Clone- Non Clone	h6b1	12.806	559.213	176.635	2142.193	20.735
Ctrl MO NO	Non Clone- Non Clone	h6b1	12.806	478.311	124.483	3619.703	20.735
Ctrl MO NO	Non Clone- Non Clone
Ctrl MO NO	Non Clone- Non Clone	h6b2	18.588	335.588	95.331	946.847	30.136
Ctrl MO NO	Non Clone- Non Clone	h6b2	18.588	363.211	129.355	1331.556	30.136
Ctrl MO NO	Non Clone- Non Clone	h6b2	18.588	362.078	123.168	1576.189	30.136
Ctrl MO NO	Non Clone- Non Clone	h6b2	18.588	337.899	138.189	1103.613	30.136
Ctrl MO NO	Non Clone- Non Clone	h6b2	18.588	288.011	111.419	927.124	30.136
Ctrl MO NO	Non Clone- Non Clone	h6b2	18.588	225.558	110.652	755.852	30.136
Ctrl MO NO	Non Clone- Non Clone	h6b2	18.588	219.068	113.745	1797.931	30.136
Ctrl MO NO	Non Clone- Non Clone
Ctrl MO NO	Non Clone- Non Clone	h6b3	8.754	217.537	100.879	621.685	14.145
Ctrl MO NO	Non Clone- Non Clone	h6b3	8.754	252.17	104.765	781.995	14.145
Ctrl MO NO	Non Clone- Non Clone	h6b3	8.754	253.523	105.323	917.992	14.145
Ctrl MO NO	Non Clone- Non Clone	h6b3	8.754	251.081	107.524	941.871	14.145
Ctrl MO NO	Non Clone- Non Clone	h6b3	8.754	255.681	114.649	873.176	14.145
Ctrl MO NO	Non Clone- Non Clone	h6b3	8.754	278.088	116.408	864.275	14.145
Ctrl MO NO	Non Clone- Non Clone	h6b3	8.754	314.492	118.739	1112.637	14.145
Ctrl MO NO	Non Clone- Non Clone	h6b3	8.754	340.298	133.037	967.948	14.145
Ctrl MO NO	Non Clone- Non Clone
Ctrl MO NO	Non Clone- Non Clone	h6b4	9.078	347.952	125.888	863.108	14.672
Ctrl MO NO	Non Clone- Non Clone	h6b4	9.078	406.993	116.449	1309.101	14.672
Ctrl MO NO	Non Clone- Non Clone	h6b4	9.078	397.666	136.327	1161.817	14.672
Ctrl MO NO	Non Clone- Non Clone	h6b4	9.078	397.169	137.696	1725.303	14.672
Ctrl MO NO	Non Clone- Non Clone	h6b4	9.078	419.188	132.482	2020.099	14.672
Ctrl MO NO	Non Clone- Non Clone	h6b4	8.105	544.209	185.352	1431.486	13.091
Ctrl MO NO	Non Clone- Non Clone	h6b4	8.105	588.67	219.35	2339.17	13.091
Ctrl MO NO	Non Clone- Non Clone	h6b4	8.105	651.928	199.615	3290.497	13.091
Ctrl MO NO	Non Clone- Non Clone	h6b4	8.105	644.667	175.984	2746.114	13.091
Ctrl MO NO	Non Clone- Non Clone
Ctrl MO NO	Non Clone- Non Clone
Ctrl MO NO	Non Clone- Non Clone
Ctrl MO NO	Non Clone- Non Clone
Ctrl MO NO	Non Clone- Non Clone
Ctrl MO NO	Non Clone- Non Clone
Ctrl MO NO	Non Clone- Non Clone
Ctrl MO NO	Non Clone- Non Clone
Ctrl MO NO	Non Clone- Non Clone
Ctrl MO NO	Non Clone- Non Clone
Ctrl MO NO	Non Clone- Non Clone
Ctrl MO NO	Non Clone- Non Clone
Ctrl MO NO	Non Clone- Non Clone
Ctrl MO NO	Non Clone- Non Clone
Ctrl MO NO	Non Clone- Non Clone
Ctrl MO NO	Non Clone- Non Clone
Ctrl MO NO	Non Clone- Non Clone	h7b1	9.186	249.603	108.078	668.792	14.848
Ctrl MO NO	Non Clone- Non Clone	h7b1	9.186	279.693	114.419	943.604	14.848
Ctrl MO NO	Non Clone- Non Clone	h7b1	9.186	304.851	124.018	1190.898	14.848
Ctrl MO NO	Non Clone- Non Clone	h7b1	9.186	329.193	103.736	1087.098	14.848
Ctrl MO NO	Non Clone- Non Clone	h7b1	9.186	360.974	143.981	1199.802	14.848
Ctrl MO NO	Non Clone- Non Clone	h7b1	9.186	390.099	140.384	1045.668	14.848
Ctrl MO NO	Non Clone- Non Clone	h7b1	9.186	404.385	137.47	1003.704	14.848
Ctrl MO NO	Non Clone- Non Clone	h7b1	9.186	396.076	163.608	1103.535	14.848
Ctrl MO NO	Non Clone- Non Clone	h7b1	9.186	384.44	157.018	830.057	14.848
Ctrl MO NO	Non Clone- Non Clone
Ctrl MO NO	Non Clone- Non Clone	h7b2	14.211	332.558	123.551	900.878	23.019
Ctrl MO NO	Non Clone- Non Clone	h7b2	14.211	374.114	122.35	1131.15	23.019
Ctrl MO NO	Non Clone- Non Clone	h7b2	14.211	398.401	124.329	1081.635	23.019
Ctrl MO NO	Non Clone- Non Clone	h7b2	14.211	426.695	127.761	1104.834	23.019
Ctrl MO NO	Non Clone- Non Clone	h7b2	14.211	448.129	123.761	1130.323	23.019
Ctrl MO NO	Non Clone- Non Clone	h7b2	14.211	468.628	140.29	1511.39	23.019
Ctrl MO NO	Non Clone- Non Clone	h7b2	14.211	474.728	160.116	1623.676	23.019
Ctrl MO NO	Non Clone- Non Clone
Ctrl MO NO	Non Clone- Non Clone	h7b3	10.699	243.982	110.358	672.541	17.308
Ctrl MO NO	Non Clone- Non Clone	h7b3	10.699	261.022	107.523	768.65	17.308
Ctrl MO NO	Non Clone- Non Clone	h7b3	10.699	280.281	122.484	703.841	17.308
Ctrl MO NO	Non Clone- Non Clone	h7b3	10.699	297.76	118.7	741.137	17.308
Ctrl MO NO	Non Clone- Non Clone	h7b3	10.699	318.582	119.894	794.149	17.308
Ctrl MO NO	Non Clone- Non Clone	h7b3	10.699	342.245	126.13	909.932	17.308
Ctrl MO NO	Non Clone- Non Clone	h7b3	10.699	370.158	127.358	1468.084	17.308
Ctrl MO NO	Non Clone- Non Clone	h7b3	10.699	389.229	130.308	1940.925	17.308
Ctrl MO NO	Non Clone- Non Clone
Ctrl MO NO	Non Clone- Non Clone	h7b4	8.7	227.235	109.51	653.091	14.057
Ctrl MO NO	Non Clone- Non Clone	h7b4	8.7	270.481	123.585	831.187	14.057
Ctrl MO NO	Non Clone- Non Clone	h7b4	8.7	299.449	119.24	912.437	14.057
Ctrl MO NO	Non Clone- Non Clone	h7b4	8.7	317.446	124.402	894.253	14.057
Ctrl MO NO	Non Clone- Non Clone	h7b4	8.7	335.884	130.664	1120.529	14.057
Ctrl MO NO	Non Clone- Non Clone	h7b4	8.7	352.403	136.086	1083.684	14.057
Ctrl MO NO	Non Clone- Non Clone	h7b4	8.7	364.241	156.347	1075.324	14.057
Ctrl MO NO	Non Clone- Non Clone
Ctrl MO NO	Non Clone- Non Clone	h7b5	10.537	196.495	105.876	970.175	17.045
Ctrl MO NO	Non Clone- Non Clone	h7b5	10.537	212.784	104.629	1093.052	17.045
Ctrl MO NO	Non Clone- Non Clone	h7b5	10.537	232.678	106.106	1142.423	17.045
Ctrl MO NO	Non Clone- Non Clone	h7b5	10.537	241.957	109.759	957.315	17.045
Ctrl MO NO	Non Clone- Non Clone	h7b5	10.537	260.001	111.962	865.316	17.045
Ctrl MO NO	Non Clone- Non Clone	h7b5	10.537	285.286	115.17	1140.278	17.045
Ctrl MO NO	Non Clone- Non Clone	h7b5	10.537	323.791	101.891	1149.244	17.045
Ctrl MO NO	Non Clone- Non Clone	h7b5	10.537	346.402	127.94	1245.575	17.045
Ctrl MO NO	Non Clone- Non Clone	h7b5	10.537	363.614	107.734	1287.135	17.045
Ctrl MO NO	Non Clone- Non Clone	h7b5	10.537	334.929	118.657	1329.141	17.045
Ctrl MO NO	Non Clone- Non Clone	h8b1	5.674	298.55	100.12	2629.87	9.137
Ctrl MO NO	Non Clone- Non Clone	h8b1	5.674	311.288	109.263	2758.657	9.137
Ctrl MO NO	Non Clone- Non Clone	h8b1	5.674	302.752	108.416	2295.501	9.137
Ctrl MO NO	Non Clone- Non Clone	h8b1	5.674	307.999	106.2	2068.647	9.137
Ctrl MO NO	Non Clone- Non Clone	h8b1	5.674	316.507	119.278	1612.562	9.137
Ctrl MO NO	Non Clone- Non Clone	h8b1	5.674	322.52	123.579	1346.173	9.137
Ctrl MO NO	Non Clone- Non Clone
Ctrl MO NO	Non Clone- Non Clone	h8b2	10.753	266.737	108.782	926.989	17.396
Ctrl MO NO	Non Clone- Non Clone	h8b2	10.753	309.078	104.245	1246.662	17.396
Ctrl MO NO	Non Clone- Non Clone	h8b2	10.753	332.334	113.46	1283.939	17.396
Ctrl MO NO	Non Clone- Non Clone	h8b2	10.753	353.181	112.852	1190.512	17.396
Ctrl MO NO	Non Clone- Non Clone	h8b2	10.753	382.503	115.544	1174.883	17.396
Ctrl MO NO	Non Clone- Non Clone	h8b2	10.753	391.66	113.236	1273.732	17.396
Ctrl MO NO	Non Clone- Non Clone	h8b2	10.753	403.873	117.805	1525.346	17.396
Ctrl MO NO	Non Clone- Non Clone	h8b2	10.753	391.97	125.184	1428.628	17.396
Ctrl MO NO	Non Clone- Non Clone	h8b2	10.753	376.236	126.543	1632.922	17.396
Ctrl MO NO	Non Clone- Non Clone	h8b2	10.753	398.679	132.365	2988.974	17.396
Ctrl MO NO	Non Clone- Non Clone
Ctrl MO NO	Non Clone- Non Clone	h8b3	10.321	188.332	103.105	558.264	16.693
Ctrl MO NO	Non Clone- Non Clone	h8b3	10.321	228.084	106.316	727.237	16.693
Ctrl MO NO	Non Clone- Non Clone	h8b3	10.321	265.463	113.102	1204.456	16.693
Ctrl MO NO	Non Clone- Non Clone	h8b3	10.321	285.487	116.601	868.504	16.693
Ctrl MO NO	Non Clone- Non Clone	h8b3	10.321	309.439	96.458	1176.12	16.693
Ctrl MO NO	Non Clone- Non Clone	h8b3	10.321	315.778	111.191	980.685	16.693
Ctrl MO NO	Non Clone- Non Clone	h8b3	10.321	338.488	115.371	985.042	16.693
Ctrl MO NO	Non Clone- Non Clone	h8b3	10.321	353.581	129.028	1103.443	16.693
Ctrl MO NO	Non Clone- Non Clone
Ctrl MO NO	Non Clone- Non Clone	h8b4	11.131	228.393	106.506	715.72	18.011
Ctrl MO NO	Non Clone- Non Clone	h8b4	11.131	293.85	105.187	1355.954	18.011
Ctrl MO NO	Non Clone- Non Clone	h8b4	11.131	362.431	110.811	2576.665	18.011
Ctrl MO NO	Non Clone- Non Clone	h8b4	11.131	381.983	117.789	2373.83	18.011
Ctrl MO NO	Non Clone- Non Clone	h8b4	11.077	484.408	147.15	1772.046	17.923
Ctrl MO NO	Non Clone- Non Clone	h8b4	11.077	480.448	128.37	1476.724	17.923
Ctrl MO NO	Non Clone- Non Clone	h8b4	11.077	506.702	150.358	1489.443	17.923
Ctrl MO NO	Non Clone- Non Clone	h8b4	11.077	534.894	148.844	1769.504	17.923
Ctrl MO NO	Non Clone- Non Clone	h8b4	11.077	570.15	170.295	1791.289	17.923
Ctrl MO NO	Non Clone- Non Clone	h8b4	11.077	576.276	176.274	2570.751	17.923
Ctrl MO NO	Non Clone- Non Clone	h8b4	11.077	503.142	138.277	2624.95	17.923
Ctrl MO NO	Non Clone- Non Clone
Ctrl MO NO	Non Clone- Non Clone	h8b5	6.646	243.316	105.746	659.902	10.719
Ctrl MO NO	Non Clone- Non Clone	h8b5	6.646	302.998	116.334	977.689	10.719
Ctrl MO NO	Non Clone- Non Clone	h8b5	6.646	331.777	119.672	1563.569	10.719
Ctrl MO NO	Non Clone- Non Clone	h8b5	6.7	412.001	126.329	2073.371	10.807
Ctrl MO NO	Non Clone- Non Clone	h8b5	6.7	419.626	120.513	1777.587	10.807
Ctrl MO NO	Non Clone- Non Clone	h8b5	6.7	462.676	132.008	1702.543	10.807
Ctrl MO NO	Non Clone- Non Clone	h8b5	6.7	472.414	137.813	1932.129	10.807
Ctrl MO NO	Non Clone- Non Clone	h8b5	6.7	440.079	129.341	1775.446	10.807
Ctrl MO NO	Non Clone- Non Clone	h8b5	6.7	394.731	143.056	1422.519	10.807
Ctrl MO NO	Non Clone- Non Clone
Ctrl MO NO	Non Clone- Non Clone	h8b6	10.915	286.858	103.145	1335.11	17.66
Ctrl MO NO	Non Clone- Non Clone	h8b6	10.915	347.54	118.264	1916.486	17.66
Ctrl MO NO	Non Clone- Non Clone	h8b6	10.915	374.142	125.071	2361.386	17.66
Ctrl MO NO	Non Clone- Non Clone	h8b6	10.915	378.666	128.835	1906.79	17.66
Ctrl MO NO	Non Clone- Non Clone	h8b6	10.915	388.529	123.56	2341.339	17.66
Ctrl MO NO	Non Clone- Non Clone	h8b6	10.915	395.953	135.391	2134.816	17.66
Ctrl MO NO	Non Clone- Non Clone	h8b6	10.915	401.045	149.764	1336.59	17.66
Ctrl MO NO	Non Clone- Non Clone	h8b6	10.915	401.246	162.77	1077.372	17.66
Ctrl MO NO	Non Clone- Non Clone	h8b6	10.915	409.878	140.947	1499.144	17.66
Ctrl MO NO	Non Clone- Non Clone	h8b6	10.915	431.531	127.683	1264.311	17.66
Ctrl MO NO	Non Clone- Non Clone	h8b6	10.915	456.73	171.308	1493.707	17.66
Ecad MO CO	Clone- Clone	h1b1	17.399	185.706	96.909	526.316	28.203
Ecad MO CO	Clone- Clone	h1b1	17.399	208.507	97.68	630.557	28.203
Ecad MO CO	Clone- Clone	h1b1	17.399	223.938	100.414	619.097	28.203
Ecad MO CO	Clone- Clone	h1b1	17.399	226.878	99.619	660.667	28.203
Ecad MO CO	Clone- Clone	h1b1	17.399	223.558	99.27	791.546	28.203
Ecad MO CO	Clone- Clone	h1b1	17.399	224.643	99.262	1096.682	28.203
Ecad MO CO	Clone- Clone	h1b1	17.399	220.593	101.973	884.993	28.203
Ecad MO CO	Clone- Clone	h1b1	17.399	217.837	107.94	684.709	28.203
Ecad MO CO	Clone- Clone
Ecad MO CO	Clone- Clone	h1b2	5.998	156.026	99.203	415.784	9.664
Ecad MO CO	Clone- Clone	h1b2	5.998	174.189	100.626	618.973	9.664
Ecad MO CO	Clone- Clone	h1b2	5.998	180.718	98.922	561.55	9.664
Ecad MO CO	Clone- Clone	h1b2	5.998	187.074	105.33	606.267	9.664
Ecad MO CO	Clone- Clone	h1b2	5.998	194.641	102.669	480.553	9.664
Ecad MO CO	Clone- Clone	h1b2	5.998	204.873	99.509	428.654	9.664
Ecad MO CO	Clone- Clone	h1b2	5.998	214.116	103.266	672.017	9.664
Ecad MO CO	Clone- Clone	h1b2	5.998	214.876	105.313	779.984	9.664
Ecad MO CO	Clone- Clone
Ecad MO CO	Clone- Clone	h1b3	9.186	196.187	99.952	484.237	14.848
Ecad MO CO	Clone- Clone	h1b3	9.186	228.577	100.743	645.989	14.848
Ecad MO CO	Clone- Clone	h1b3	9.186	278.44	99.102	751.46	14.848
Ecad MO CO	Clone- Clone	h1b3	9.186	286.179	100.963	1085.772	14.848
Ecad MO CO	Clone- Clone	h1b3	9.186	281.434	115.87	1319.98	14.848
Ecad MO CO	Clone- Clone	h1b3	9.186	278.837	107.759	1102.553	14.848
Ecad MO CO	Clone- Clone	h1b3	9.186	244.942	101.339	988.945	14.848
Ecad MO CO	Clone- Clone	h1b3	9.186	220.544	108.978	803.004	14.848
Ecad MO CO	Clone- Clone	h1b3	9.186	203.201	113.858	592.538	14.848
Ecad MO CO	Clone- Clone	h2b1	10.158	200.001	95.355	779.308	16.43
Ecad MO CO	Clone- Clone	h2b1	10.158	240.858	102.416	1344.706	16.43
Ecad MO CO	Clone- Clone	h2b1	10.158	282.222	104.953	1385.974	16.43
Ecad MO CO	Clone- Clone	h2b1	10.158	290.057	106.538	1837.821	16.43
Ecad MO CO	Clone- Clone	h2b1	10.158	274.313	108.999	1384.695	16.43
Ecad MO CO	Clone- Clone
Ecad MO CO	Clone- Clone	h2b2	17.129	179.5	99.56	476.41	27.763
Ecad MO CO	Clone- Clone	h2b2	17.129	222.713	108.148	777.643	27.763
Ecad MO CO	Clone- Clone	h2b2	17.129	280.117	113.833	975.32	27.763
Ecad MO CO	Clone- Clone	h2b2	17.129	322.225	120.416	1284.153	27.763
Ecad MO CO	Clone- Clone	h2b2	17.129	373.13	133.186	1379.885	27.763
Ecad MO CO	Clone- Clone	h2b2	17.129	436.953	125.977	1484.356	27.763
Ecad MO CO	Clone- Clone	h2b2	17.129	442.881	139.932	1822.368	27.763
Ecad MO CO	Clone- Clone	h2b2	17.129	393.437	138.331	2676.049	27.763
Ecad MO CO	Clone- Clone
Ecad MO CO	Clone- Clone	h2b3	11.239	235.64	96.187	697.162	18.187
Ecad MO CO	Clone- Clone	h2b3	11.239	294.753	104.222	752.826	18.187
Ecad MO CO	Clone- Clone	h2b3	11.239	308.211	113.303	993.104	18.187
Ecad MO CO	Clone- Clone	h2b3	11.239	306.57	110.999	946.537	18.187
Ecad MO CO	Clone- Clone	h2b3	11.239	309.447	123.269	1034.806	18.187
Ecad MO CO	Clone- Clone	h2b3	11.239	300.213	125.741	1083.387	18.187
Ecad MO CO	Clone- Clone
Ecad MO CO	Clone- Clone	h2b4	11.023	285.099	102.983	757.478	17.835
Ecad MO CO	Clone- Clone	h2b4	11.023	342.271	101.372	958.577	17.835
Ecad MO CO	Clone- Clone	h2b4	11.023	373.782	102.923	1470.111	17.835
Ecad MO CO	Clone- Clone	h2b4	11.023	381.999	108.584	1864.759	17.835
Ecad MO CO	Clone- Clone	h2b4	11.023	431.872	120.241	2057.543	17.835
Ecad MO CO	Clone- Clone	h2b4	11.023	467.618	117.858	1691.816	17.835
Ecad MO PO	Non Clone- Clone	h3b5	7.727	315.019	143.65	1003.564	12.476
Ecad MO PO	Non Clone- Clone	h3b5	7.727	253.523	122.218	533.119	12.476
Ecad MO PO	Non Clone- Clone	h3b5	7.727	215.922	118.484	589.225	12.476
Ecad MO PO	Non Clone- Clone	h3b5	7.727	209.091	105.661	929.421	12.476
Ecad MO PO	Non Clone- Clone
Ecad MO PO	Non Clone- Clone	h4b1	12.158	252.42	105.649	1665.408	19.68
Ecad MO PO	Non Clone- Clone	h4b1	12.158	247.961	102.246	1238.447	19.68
Ecad MO PO	Non Clone- Clone	h4b1	12.158	228.994	97.229	1650.013	19.68
Ecad MO PO	Non Clone- Clone	h4b1	12.158	202.736	103.994	969.1	19.68
Ecad MO PO	Non Clone- Clone	h4b1	12.158	171.147	100.512	669.824	19.68
Ecad MO PO	Non Clone- Clone	h4b1	12.158	149.963	96.784	394.584	19.68
Ecad MO PO	Non Clone- Clone
Ecad MO PO	Non Clone- Clone	h4b2	10.104	365.689	133.562	4084.374	16.342
Ecad MO PO	Non Clone- Clone	h4b2	10.104	315.896	105.726	3994.01	16.342
Ecad MO PO	Non Clone- Clone	h4b2	10.104	250.729	109.136	1428.927	16.342
Ecad MO PO	Non Clone- Clone	h4b2	10.104	210.655	108.885	932.121	16.342
Ecad MO PO	Non Clone- Clone	h4b2	10.104	186.382	105.506	539.47	16.342
Ecad MO PO	Non Clone- Clone
Ecad MO PO	Non Clone- Clone	h4b3	15.508	251.412	108.331	1483.597	25.128
Ecad MO PO	Non Clone- Clone	h4b3	15.508	277.662	109.306	1887.589	25.128
Ecad MO PO	Non Clone- Clone	h4b3	15.508	285.544	110.446	2406.306	25.128
Ecad MO PO	Non Clone- Clone	h4b3	15.508	270.662	100.068	1444.093	25.128
Ecad MO PO	Non Clone- Clone	h4b3	15.508	243.588	106.908	976.769	25.128
Ecad MO PO	Non Clone- Clone	h4b3	15.508	212.76	103.762	887.708	25.128
Ecad MO PO	Non Clone- Clone	h5b1	4.701	184.954	100.452	900.373	7.556
Ecad MO PO	Non Clone- Clone	h5b1	4.701	184.993	100.066	623.543	7.556
Ecad MO PO	Non Clone- Clone	h5b1	4.701	177.432	101.171	520.114	7.556
Ecad MO PO	Non Clone- Clone	h5b1	4.701	168.806	100.374	624.347	7.556
Ecad MO PO	Non Clone- Clone	h5b1	4.701	160.987	91.311	710.467	7.556
Ecad MO PO	Non Clone- Clone	h5b1	4.701	148.881	100.511	573.736	7.556
Ecad MO PO	Non Clone- Clone	h5b1	4.701	140.519	94.974	302.661	7.556
Ecad MO PO	Non Clone- Clone
Ecad MO PO	Non Clone- Clone	h5b2	7.889	148.694	99.246	443.468	12.739
Ecad MO PO	Non Clone- Clone	h5b2	7.889	151.904	99.793	530.997	12.739
Ecad MO PO	Non Clone- Clone	h5b2	7.889	148.336	97.61	447.365	12.739
Ecad MO PO	Non Clone- Clone	h5b2	7.889	142.913	99.182	294.01	12.739
Ecad MO PO	Non Clone- Clone	h5b2	7.889	140.697	98.426	349.332	12.739
Ecad MO PO	Non Clone- Clone	h5b2	7.889	138.857	100.603	365.368	12.739
Ecad MO PO	Non Clone- Clone
Ecad MO PO	Non Clone- Clone	h5b3	10.104	232.261	105.597	689.239	16.342
Ecad MO PO	Non Clone- Clone	h5b3	10.104	224.509	105.325	837.212	16.342
Ecad MO PO	Non Clone- Clone	h5b3	10.104	215.412	104.732	869.439	16.342
Ecad MO PO	Non Clone- Clone	h5b3	10.104	200.71	101.78	921.266	16.342
Ecad MO PO	Non Clone- Clone	h5b3	10.104	175.493	96.978	488.631	16.342
Ecad MO PO	Non Clone- Clone	h5b3	10.104	163.732	99.952	378.702	16.342
Ecad MO PO	Non Clone- Clone
Ecad MO PO	Non Clone- Clone	h5b4	10.05	312.921	115.655	927.24	16.254
Ecad MO PO	Non Clone- Clone	h5b4	10.05	292.543	113.225	851.411	16.254
Ecad MO PO	Non Clone- Clone	h5b4	10.05	251.916	123.944	694.38	16.254
Ecad MO PO	Non Clone- Clone	h5b4	10.05	199.002	105.732	446.411	16.254
Ecad MO PO	Non Clone- Clone	h5b4	10.05	162.091	107.802	300.036	16.254
Ecad MO PO	Non Clone- Clone	h5b4	10.05	149.352	103.923	322.845	16.254
Ecad MO PO	Non Clone- Clone
Ecad MO PO	Non Clone- Clone	h5b5	4.053	351.08	139.385	1162.817	6.502
Ecad MO PO	Non Clone- Clone	h5b5	4.053	367.48	153.564	758.423	6.502
Ecad MO PO	Non Clone- Clone	h5b5	4.053	353.792	166.294	658.617	6.502
Ecad MO PO	Non Clone- Clone	h5b5	4.053	304.144	142.97	774.733	6.502
Ecad MO PO	Non Clone- Clone	h5b5	4.053	242.235	124.963	623.927	6.502
Ecad MO PO	Non Clone- Clone	h5b5	4.053	211.779	120.149	477.578	6.502
Ecad MO PO	Non Clone- Clone	h5b5	4.053	186.34	116.945	428.318	6.502
Ecad MO PO	Non Clone- Clone
Ecad MO PO	Non Clone- Clone	h5b6	6.268	165.084	103.789	450.234	10.104
Ecad MO PO	Non Clone- Clone	h5b6	6.268	155.253	101.054	320.564	10.104
Ecad MO PO	Non Clone- Clone	h5b6	6.268	143.768	94.693	309.684	10.104
Ecad MO PO	Non Clone- Clone	h5b6	6.268	135.885	101.208	280.04	10.104
Ecad MO PO	Non Clone- Clone	h5b6	6.268	130.401	97.916	214.041	10.104
Ecad MO NO	Non Clone- Non Clone	h1b1	10.861	599.332	204.753	1547.545	17.572
Ecad MO NO	Non Clone- Non Clone	h1b1	10.861	517.362	200.011	1440.36	17.572
Ecad MO NO	Non Clone- Non Clone	h1b1	10.861	398.732	154.729	1088.746	17.572
Ecad MO NO	Non Clone- Non Clone	h1b1	10.861	333.511	139.877	894.217	17.572
Ecad MO NO	Non Clone- Non Clone	h1b1	10.861	281.086	128.603	633.387	17.572
Ecad MO NO	Non Clone- Non Clone	h1b1	10.861	232.657	124.45	504.763	17.572
Ecad MO NO	Non Clone- Non Clone	h1b1	10.861	194.41	105.351	425.77	17.572
Ecad MO NO	Non Clone- Non Clone
Ecad MO NO	Non Clone- Non Clone	h1b2	6.646	628.255	170.716	2219.899	10.719
Ecad MO NO	Non Clone- Non Clone	h1b2	6.646	593.508	142.171	2211.046	10.719
Ecad MO NO	Non Clone- Non Clone	h1b2	6.646	553.17	155.736	2070.268	10.719
Ecad MO NO	Non Clone- Non Clone	h1b2	6.646	454.5	139.371	1543.738	10.719
Ecad MO NO	Non Clone- Non Clone	h1b2	6.646	343.894	158.107	860.103	10.719
Ecad MO NO	Non Clone- Non Clone	h1b2	6.646	293.227	138.255	739.92	10.719
Ecad MO NO	Non Clone- Non Clone	h1b2	6.646	266.514	134.492	807.316	10.719
Ecad MO NO	Non Clone- Non Clone
Ecad MO NO	Non Clone- Non Clone	h1b3	8.105	485.477	133.221	2123.206	13.084
Ecad MO NO	Non Clone- Non Clone	h1b3	8.105	462.87	138.968	2008.791	13.084
Ecad MO NO	Non Clone- Non Clone	h1b3	8.105	398.884	129.946	1250.585	13.084
Ecad MO NO	Non Clone- Non Clone	h1b3	8.105	364.897	132.875	1127.163	13.084
Ecad MO NO	Non Clone- Non Clone	h1b3	8.105	337.332	131.492	1165.162	13.084
Ecad MO NO	Non Clone- Non Clone
Ecad MO NO	Non Clone- Non Clone	h1b4	8.267	718.526	182.926	1765.522	13.354
Ecad MO NO	Non Clone- Non Clone	h1b4	8.267	660.972	207.308	1631.72	13.354
Ecad MO NO	Non Clone- Non Clone	h1b4	8.267	566.991	188.86	1345.524	13.354
Ecad MO NO	Non Clone- Non Clone	h1b4	8.267	459.482	188.47	1351.679	13.354
Ecad MO NO	Non Clone- Non Clone	h1b4	8.267	341.733	158.874	1386.551	13.354
Ecad MO NO	Non Clone- Non Clone	h1b4	8.267	263.251	123.883	1087.818	13.354
Ecad MO NO	Non Clone- Non Clone
Ecad MO NO	Non Clone- Non Clone	h1b5	8.591	705.354	186.169	1936.699	13.882
Ecad MO NO	Non Clone- Non Clone	h1b5	8.591	713.331	217.492	2009.868	13.882
Ecad MO NO	Non Clone- Non Clone	h1b5	8.591	709.554	213.962	2003.862	13.882
Ecad MO NO	Non Clone- Non Clone	h1b5	8.591	679.605	182.481	1978.64	13.882
Ecad MO NO	Non Clone- Non Clone	h1b5	8.591	594.575	196.188	1511.16	13.882
Ecad MO NO	Non Clone- Non Clone	h1b5	8.591	524.927	179.898	1265.907	13.882
Ecad MO NO	Non Clone- Non Clone	h1b5	8.591	447.293	178.377	1154.088	13.882
Ecad MO NO	Non Clone- Non Clone	h1b5	8.591	360.095	151.678	1030.968	13.882
Ecad MO NO	Non Clone- Non Clone	h1b5	8.591	281.535	133.985	876.982	13.882
Ecad MO NO	Non Clone- Non Clone
Ecad MO NO	Non Clone- Non Clone	h1b6	4.701	609.238	0	1386.228	7.556
Ecad MO NO	Non Clone- Non Clone	h1b6	4.701	607.392	0	1644.974	7.556
Ecad MO NO	Non Clone- Non Clone	h1b6	4.701	569.873	0	2117.439	7.556
Ecad MO NO	Non Clone- Non Clone	h2b1	12.104	866.487	306.636	3778.802	19.592
Ecad MO NO	Non Clone- Non Clone	h2b1	12.104	1006.048	369.372	3510.739	19.592
Ecad MO NO	Non Clone- Non Clone	h2b1	12.104	843.058	321.263	2769.895	19.592
Ecad MO NO	Non Clone- Non Clone	h2b1	12.104	556.321	225.799	4002.375	19.592
Ecad MO NO	Non Clone- Non Clone	h2b1	12.104	417.604	146.936	4095	19.592
Ecad MO NO	Non Clone- Non Clone	h2b1	12.104	302.199	134.019	1692.997	19.592
Ecad MO NO	Non Clone- Non Clone
Ecad MO NO	Non Clone- Non Clone	h2b2	9.51	1006.999	254.824	4093.911	15.375
Ecad MO NO	Non Clone- Non Clone	h2b2	9.51	971.052	240.256	3757.152	15.375
Ecad MO NO	Non Clone- Non Clone	h2b2	9.51	630.578	267.864	1926.784	15.375
Ecad MO NO	Non Clone- Non Clone	h2b2	9.51	352.776	152.246	1007.12	15.375
Ecad MO NO	Non Clone- Non Clone
Ecad MO NO	Non Clone- Non Clone	h2b3	12.158	757.682	182.224	3252.553	19.68
Ecad MO NO	Non Clone- Non Clone	h2b3	12.158	762.614	190.223	2594.421	19.68
Ecad MO NO	Non Clone- Non Clone	h2b3	12.158	637.954	198.121	2350.743	19.68
Ecad MO NO	Non Clone- Non Clone	h2b3	12.158	388.618	153.676	1444.468	19.68
Ecad MO NO	Non Clone- Non Clone	h2b3	12.158	251.698	127.609	653.181	19.68
Ecad MO NO	Non Clone- Non Clone
Ecad MO NO	Non Clone- Non Clone	h2b4	8.808	921.794	174.397	4087.167	14.233
Ecad MO NO	Non Clone- Non Clone	h2b4	8.808	829.293	211.625	2692.36	14.233
Ecad MO NO	Non Clone- Non Clone	h2b4	8.808	510.06	207.481	3072.19	14.233
Ecad MO NO	Non Clone- Non Clone	h2b4	8.808	329.885	134.265	1739.329	14.233
Ecad MO NO	Non Clone- Non Clone	h2b4	8.808	243.334	121.293	867.464	14.233
Ecad MO NO	Non Clone- Non Clone
Ecad MO NO	Non Clone- Non Clone	h2b5	7.295	703.519	260.496	1663.33	11.773
Ecad MO NO	Non Clone- Non Clone	h2b5	7.295	577.481	272.75	1373.212	11.773
Ecad MO NO	Non Clone- Non Clone	h2b5	7.295	484.218	201.093	1966.075	11.773
Ecad MO NO	Non Clone- Non Clone	h2b5	7.295	366.092	146.28	2339.541	11.773
Ecad MO NO	Non Clone- Non Clone
Ecad MO NO	Non Clone- Non Clone	h2b6	6.214	1041.802	250.801	4095	10.016
Ecad MO NO	Non Clone- Non Clone	h2b6	6.214	831.549	277.732	3639.612	10.016
Ecad MO NO	Non Clone- Non Clone	h2b6	6.214	465.054	199.208	849.333	10.016
Ecad MO NO	Non Clone- Non Clone	h2b6	6.214	300.172	151.105	617.678	10.016
Ecad MO NO	Non Clone- Non Clone	h3b1	9.024	709.49	207.335	1880.923	14.585
Ecad MO NO	Non Clone- Non Clone	h3b1	9.024	744.778	229.903	2033.364	14.585
Ecad MO NO	Non Clone- Non Clone	h3b1	9.024	709.974	222.406	2382.675	14.585
Ecad MO NO	Non Clone- Non Clone	h3b1	9.024	630.186	190.797	2418.14	14.585
Ecad MO NO	Non Clone- Non Clone	h3b1	9.024	516.847	206.518	2070.767	14.585
Ecad MO NO	Non Clone- Non Clone	h3b1	9.024	375.772	144.321	861.873	14.585
Ecad MO NO	Non Clone- Non Clone	h3b1	9.024	293.676	139.595	1245.248	14.585
Ecad MO NO	Non Clone- Non Clone	h3b1	9.024	263.431	134.332	1153.386	14.585
Ecad MO NO	Non Clone- Non Clone	h3b1	9.024	245.03	115.72	957.679	14.585
Ecad MO NO	Non Clone- Non Clone
Ecad MO NO	Non Clone- Non Clone	h3b2	9.888	597.794	168.348	2979.065	15.99
Ecad MO NO	Non Clone- Non Clone	h3b2	9.888	639.741	213.51	2083.944	15.99
Ecad MO NO	Non Clone- Non Clone	h3b2	9.888	623.085	205.537	1782.638	15.99
Ecad MO NO	Non Clone- Non Clone	h3b2	9.888	551.259	212.413	1505.506	15.99
Ecad MO NO	Non Clone- Non Clone	h3b2	9.888	455.401	184.17	1058.933	15.99
Ecad MO NO	Non Clone- Non Clone	h3b2	9.888	371.39	165.931	1226.854	15.99
Ecad MO NO	Non Clone- Non Clone	h3b2	9.888	318.299	147.294	1146.289	15.99
Ecad MO NO	Non Clone- Non Clone	h3b2	9.888	274.588	122.722	927.95	15.99
Ecad MO NO	Non Clone- Non Clone	h3b2	9.888	223.945	100.78	1051.901	15.99
Ecad MO NO	Non Clone- Non Clone
Ecad MO NO	Non Clone- Non Clone	h3b3	9.726	700.626	196.131	4095	15.727
Ecad MO NO	Non Clone- Non Clone	h3b3	9.726	693.509	193.842	4080.521	15.727
Ecad MO NO	Non Clone- Non Clone	h3b3	9.726	577.527	208.717	1767.23	15.727
Ecad MO NO	Non Clone- Non Clone	h3b3	9.726	443.783	185.142	1413.226	15.727
Ecad MO NO	Non Clone- Non Clone	h3b3	9.726	353.907	154.043	1334.049	15.727
Ecad MO NO	Non Clone- Non Clone	h3b3	9.726	287.985	129.15	875.72	15.727
Ecad MO NO	Non Clone- Non Clone
Ecad MO NO	Non Clone- Non Clone	h3b4	8.105	571.382	187.089	1419.036	13.084
Ecad MO NO	Non Clone- Non Clone	h3b4	8.105	444.361	189.776	1149.463	13.084
Ecad MO NO	Non Clone- Non Clone	h3b4	8.105	330.795	149.457	1108.373	13.084
Ecad MO NO	Non Clone- Non Clone	h3b4	8.105	259.675	136.882	798.959	13.084
Ecad MO NO	Non Clone- Non Clone	h3b4	8.105	208.712	113.814	420.997	13.084
Ecad MO NO	Non Clone- Non Clone	h3b4	8.105	172.315	111.036	358.45	13.084
Ecad MO NO	Non Clone- Non Clone	h3b4	8.105	154.232	105.126	365.583	13.084
Ecad MO NO	Non Clone- Non Clone	h4b1	15.4	335.276	107.855	2230.684	24.952
Ecad MO NO	Non Clone- Non Clone	h4b1	15.4	291.43	110.722	1489.672	24.952
Ecad MO NO	Non Clone- Non Clone	h4b1	15.4	246.87	109.802	708.737	24.952
Ecad MO NO	Non Clone- Non Clone	h4b1	15.4	215.123	111.404	1189.594	24.952
Ecad MO NO	Non Clone- Non Clone	h4b1	15.4	190.742	107.022	1990.496	24.952
Ecad MO NO	Non Clone- Non Clone	h4b1	15.4	171.321	99.239	2440.059	24.952
Ecad MO NO	Non Clone- Non Clone
Ecad MO NO	Non Clone- Non Clone	h4b2	10.753	335.901	99.195	2363.437	17.396
Ecad MO NO	Non Clone- Non Clone	h4b2	10.753	316.838	107.637	1034.129	17.396
Ecad MO NO	Non Clone- Non Clone	h4b2	10.753	270.203	108.94	918.398	17.396
Ecad MO NO	Non Clone- Non Clone	h4b2	10.753	219.723	106.01	781.86	17.396
Ecad MO NO	Non Clone- Non Clone	h4b2	10.753	184.982	103.627	536.235	17.396
Ecad MO NO	Non Clone- Non Clone
Ecad MO NO	Non Clone- Non Clone	h4b3	13.563	355.076	125.596	1698.795	21.965
Ecad MO NO	Non Clone- Non Clone	h4b3	13.563	369.036	122.994	2619.973	21.965
Ecad MO NO	Non Clone- Non Clone	h4b3	13.563	367.033	142.178	3834.606	21.965
Ecad MO NO	Non Clone- Non Clone	h4b3	13.563	341.095	130.589	3954.771	21.965
Ecad MO NO	Non Clone- Non Clone	h4b3	13.563	294.452	122.229	2602.118	21.965
Ecad MO NO	Non Clone- Non Clone
Ecad MO NO	Non Clone- Non Clone	h4b4	12.644	326.868	116.991	1382.969	20.471
Ecad MO NO	Non Clone- Non Clone	h4b4	12.644	292.373	124.114	1309.384	20.471
Ecad MO NO	Non Clone- Non Clone	h4b4	12.644	227.625	110.101	977.475	20.471
Ecad MO NO	Non Clone- Non Clone	h4b4	12.644	181.52	106.842	656.165	20.471
Ecad MO NO	Non Clone- Non Clone	h5b1	7.078	277.373	115.147	891.314	11.422
Ecad MO NO	Non Clone- Non Clone	h5b1	7.078	278.472	106.805	1312.949	11.422
Ecad MO NO	Non Clone- Non Clone	h5b1	7.078	266.807	112.913	1405.387	11.422
Ecad MO NO	Non Clone- Non Clone	h5b1	7.078	222.755	112.461	1005.786	11.422
Ecad MO NO	Non Clone- Non Clone	h5b1	7.078	187.356	108.289	461.584	11.422
Ecad MO NO	Non Clone- Non Clone	h5b1	7.078	175.676	111.764	423.834	11.422
Ecad MO NO	Non Clone- Non Clone
Ecad MO NO	Non Clone- Non Clone	h5b2	9.618	178.252	104.696	409.764	15.551
Ecad MO NO	Non Clone- Non Clone	h5b2	9.618	172.783	100.324	438.595	15.551
Ecad MO NO	Non Clone- Non Clone	h5b2	9.618	167.829	100.812	473.531	15.551
Ecad MO NO	Non Clone- Non Clone	h5b2	9.618	162.306	100.987	493.713	15.551
Ecad MO NO	Non Clone- Non Clone	h5b2	9.618	157.074	99.229	624.842	15.551
Ecad MO NO	Non Clone- Non Clone	h5b2	9.618	150.914	97.793	1181.634	15.551
Ecad MO NO	Non Clone- Non Clone
Ecad MO NO	Non Clone- Non Clone	h5b3	7.403	214.13	112.594	539.548	11.902
Ecad MO NO	Non Clone- Non Clone	h5b3	7.403	214.688	108.863	566.675	11.902
Ecad MO NO	Non Clone- Non Clone	h5b3	7.403	211.515	107.23	454.196	11.902
Ecad MO NO	Non Clone- Non Clone	h5b3	7.403	206.069	114.056	489.259	11.902
Ecad MO NO	Non Clone- Non Clone	h5b3	7.403	199.46	112.571	735.158	11.902
Ecad MO NO	Non Clone- Non Clone	h5b3	7.403	188.5	105.271	803.681	11.902
Ecad MO NO	Non Clone- Non Clone	h5b3	7.403	176.898	101.027	489.457	11.902
Ecad MO NO	Non Clone- Non Clone
Ecad MO NO	Non Clone- Non Clone	h5b4	11.833	414.821	116.096	2634.381	19.153
Ecad MO NO	Non Clone- Non Clone	h5b4	11.833	414.243	109.353	2025.894	19.153
Ecad MO NO	Non Clone- Non Clone	h5b4	11.833	389.368	112.476	1396.754	19.153
Ecad MO NO	Non Clone- Non Clone	h5b4	11.833	351.602	106.581	1572.739	19.153
Ecad MO NO	Non Clone- Non Clone	h5b4	11.833	284.893	102.689	1410.391	19.153
Ecad MO NO	Non Clone- Non Clone	h5b4	11.833	223.597	105.328	745.853	19.153
Ecad MO NO	Non Clone- Non Clone	h5b4	11.833	191.586	104.963	585.483	19.153
Ecad MO NO	Non Clone- Non Clone
Ecad MO NO	Non Clone- Non Clone	h5b5	6.484	428.291	123.264	1210.573	10.455
Ecad MO NO	Non Clone- Non Clone	h5b5	6.484	420.708	134.643	1213.175	10.455
Ecad MO NO	Non Clone- Non Clone	h5b5	6.484	387.401	141.216	1334.4	10.455
Ecad MO NO	Non Clone- Non Clone	h5b5	6.484	370.471	137.984	1064.378	10.455
Ecad MO NO	Non Clone- Non Clone	h5b5	6.484	342.336	127.344	1006.432	10.455
Ecad MO NO	Non Clone- Non Clone	h5b5	6.484	307.694	131.718	955.799	10.455
Ecad MO NO	Non Clone- Non Clone	h5b5	6.484	282.114	101.493	904.888	10.455
Ecad MO NO	Non Clone- Non Clone	h5b5	6.484	258.471	108.486	934.236	10.455
Ecad MO NO	Non Clone- Non Clone
Ecad MO NO	Non Clone- Non Clone	h5b6	7.024	393.966	121.435	1759.69	11.334
Ecad MO NO	Non Clone- Non Clone	h5b6	7.024	330.559	110.096	980.662	11.334
Ecad MO NO	Non Clone- Non Clone	h5b6	7.024	293.08	121.944	978.337	11.334
Ecad MO NO	Non Clone- Non Clone	h5b6	7.024	261.81	119.553	881.516	11.334
Ecad MO NO	Non Clone- Non Clone	h5b6	7.024	235.623	112.306	1005.819	11.334
Ecad MO NO	Non Clone- Non Clone	h5b6	7.024	213.985	108.846	883.861	11.334
Ecad MO NO	Non Clone- Non Clone	h5b6	7.024	189.566	102.381	772.804	11.334
Ecad MO NO	Non Clone- Non Clone
Ecad MO NO	Non Clone- Non Clone	h5b7	9.888	321.762	125.077	1573.447	15.99
Ecad MO NO	Non Clone- Non Clone	h5b7	9.888	317.834	117.912	1703.146	15.99
Ecad MO NO	Non Clone- Non Clone	h5b7	9.888	294.771	114.316	1319.339	15.99
Ecad MO NO	Non Clone- Non Clone	h5b7	9.888	258.256	107.161	1143.089	15.99
Ecad MO NO	Non Clone- Non Clone	h5b7	9.888	212.755	102.558	630.044	15.99
Ecad MO NO	Non Clone- Non Clone	h5b7	9.888	184.218	108.126	505.427	15.99
Ecad MO NO	Non Clone- Non Clone	h5b7	9.888	153.65	102.717	411.838	15.99
