# Supplementary material for: Stepwise polarisation of developing bilayered epidermis is mediated by aPKC and E-cadherin in zebrafish
Source: eLife journal article supplement (doi:10.7554/elife.49064), 2020-01-22
Supplement: fig4-figsupp2-data6 [file elife-49064-fig4-figsupp2-data6-v1.csv]

Genotype	Boundary	Cell name	Area	Mean	Min	Max	Length
Ctrl MO CO	Clone- Clone	h1b1	6.484	386.413	72.976	2000.202	10.455
Ctrl MO CO	Clone- Clone	h1b1	6.484	249.502	31.059	1228.901	10.455
Ctrl MO CO	Clone- Clone	h1b1	6.484	143.312	5.98	785.461	10.455
Ctrl MO CO	Clone- Clone	h1b1	6.484	82.527	1.314	370.277	10.455
Ctrl MO CO	Clone- Clone	h1b1	6.484	52.064	0.462	298.003	10.455
Ctrl MO CO	Clone- Clone
Ctrl MO CO	Clone- Clone	h1b2	5.295	377.416	61.845	2284.986	8.513
Ctrl MO CO	Clone- Clone	h1b2	5.295	214.657	40.927	584.466	8.513
Ctrl MO CO	Clone- Clone	h1b2	5.295	107.3	5.35	337.678	8.513
Ctrl MO CO	Clone- Clone	h1b2	5.295	77.166	5.29	831.447	8.513
Ctrl MO CO	Clone- Clone
Ctrl MO CO	Clone- Clone	h1b3	8.97	503.148	76.014	2164.28	14.497
Ctrl MO CO	Clone- Clone	h1b3	8.97	350.147	43.217	1175.294	14.497
Ctrl MO CO	Clone- Clone	h1b3	8.97	186.193	37.159	615.158	14.497
Ctrl MO CO	Clone- Clone	h1b3	8.97	86.137	2.598	279.777	14.497
Ctrl MO CO	Clone- Clone
Ctrl MO CO	Clone- Clone	h1b4	10.699	461.902	35.447	4095	17.308
Ctrl MO CO	Clone- Clone	h1b4	10.699	400.196	42.715	4095	17.308
Ctrl MO CO	Clone- Clone	h1b4	10.699	268.048	24.458	2726.34	17.308
Ctrl MO CO	Clone- Clone	h1b4	10.699	142.587	12.927	1089.107	17.308
Ctrl MO CO	Clone- Clone	h1b4	10.699	65.607	0.114	264.341	17.308
Ctrl MO CO	Clone- Clone
Ctrl MO CO	Clone- Clone	h1b5	9.942	387.665	20.298	4089.026	16.078
Ctrl MO CO	Clone- Clone	h1b5	9.942	371.066	37.443	2885.533	16.078
Ctrl MO CO	Clone- Clone	h1b5	9.942	266.571	24.973	1121.691	16.078
Ctrl MO CO	Clone- Clone	h1b5	9.942	180.718	5.998	1779.268	16.078
Ctrl MO CO	Clone- Clone	h1b5	9.942	123.816	5.192	2365.231	16.078
Ctrl MO CO	Clone- Clone	h1b5	9.942	102.207	0.015	3550.438	16.078
Ctrl MO CO	Clone- Clone
Ctrl MO CO	Clone- Clone	h1b6	7.187	726.135	96.123	4081.844	11.597
Ctrl MO CO	Clone- Clone	h1b6	7.187	607.488	82.622	2963.535	11.597
Ctrl MO CO	Clone- Clone	h1b6	7.187	448.276	85.364	2008.723	11.597
Ctrl MO CO	Clone- Clone	h1b6	7.187	332.393	52.921	1332.58	11.597
Ctrl MO CO	Clone- Clone	h1b6	7.187	279.402	34.479	4047.747	11.597
Ctrl MO CO	Clone- Clone	h1b6	7.187	245.464	20.543	4095	11.597
Ctrl MO CO	Clone- Clone
Ctrl MO CO	Clone- Clone	h1b7	10.05	548.479	94.017	4095	16.253
Ctrl MO CO	Clone- Clone	h1b7	10.05	415.044	47.613	3230.278	16.253
Ctrl MO CO	Clone- Clone	h1b7	10.05	337.269	19.78	3463.568	16.253
Ctrl MO CO	Clone- Clone	h1b7	10.05	264.607	5.199	2092.853	16.253
Ctrl MO CO	Clone- Clone
Ctrl MO CO	Clone- Clone	h1b8	11.401	522.533	71.182	4074.014	18.45
Ctrl MO CO	Clone- Clone	h1b8	11.401	504.514	74.2	4095	18.45
Ctrl MO CO	Clone- Clone	h1b8	11.401	380.25	87.858	2704.583	18.45
Ctrl MO CO	Clone- Clone	h1b8	11.401	321.108	39.635	3891.263	18.45
Ctrl MO CO	Clone- Clone	h1b8	11.401	327.347	30.173	4095	18.45
Ctrl MO CO	Clone- Clone	h1b8	11.401	287.849	10.354	4095	18.45
Ctrl MO CO	Clone- Clone
Ctrl MO CO	Clone- Clone	h1b9	10.645	620.638	92.348	4095	17.22
Ctrl MO CO	Clone- Clone	h1b9	10.645	527.859	52.94	2187.24	17.22
Ctrl MO CO	Clone- Clone	h1b9	10.645	455.503	44.831	2013.836	17.22
Ctrl MO CO	Clone- Clone	h1b9	10.645	391.477	26.487	2134.23	17.22
Ctrl MO CO	Clone- Clone	h1b9	10.645	313.382	20.08	1980.154	17.22
Ctrl MO CO	Clone- Clone	h1b9	10.645	237.81	13.821	1428.585	17.22
Ctrl MO CO	Clone- Clone
Ctrl MO CO	Clone- Clone	h1b10	8.754	603.189	129.032	3621.86	14.145
Ctrl MO CO	Clone- Clone	h1b10	8.754	484.906	68.516	2437.793	14.145
Ctrl MO CO	Clone- Clone	h1b10	8.754	346.168	52.821	2991.434	14.145
Ctrl MO CO	Clone- Clone	h1b10	8.754	225.691	19.845	1847.812	14.145
Ctrl MO CO	Clone- Clone	h1b10	8.754	129.754	1.851	1112.871	14.145
Ctrl MO CO	Clone- Clone
Ctrl MO CO	Clone- Clone	h1b11	10.969	507.681	86.993	3132.906	17.747
Ctrl MO CO	Clone- Clone	h1b11	10.969	352.787	41.184	1858.146	17.747
Ctrl MO CO	Clone- Clone	h1b11	10.969	239.53	31.313	841.313	17.747
Ctrl MO CO	Clone- Clone	h1b11	10.969	167.972	10.633	1268.892	17.747
Ctrl MO CO	Clone- Clone	h1b11	10.969	111.305	3.116	674.221	17.747
Ctrl MO CO	Clone- Clone
Ctrl MO CO	Clone- Clone	h1b12	7.889	650.77	77.515	3981.496	12.74
Ctrl MO CO	Clone- Clone	h1b12	7.889	304.338	17.976	1108.773	12.74
Ctrl MO CO	Clone- Clone	h1b12	7.889	205.497	37.802	625.406	12.74
Ctrl MO CO	Clone- Clone	h1b12	7.889	126.218	14.193	452.787	12.74
Ctrl MO CO	Clone- Clone	h1b12	7.889	76.893	3.067	226.149	12.74
Ctrl MO CO	Clone- Clone	h8b1	11.996	461.064	53.971	2562.24	19.417
Ctrl MO CO	Clone- Clone	h8b1	11.996	341.365	54.744	1326.892	19.417
Ctrl MO CO	Clone- Clone	h8b1	11.996	205.821	25.352	1611.242	19.417
Ctrl MO CO	Clone- Clone	h8b1	11.996	134.673	4.055	2198.518	19.417
Ctrl MO CO	Clone- Clone	h8b1	11.996	85.967	3.317	585.68	19.417
Ctrl MO CO	Clone- Clone
Ctrl MO CO	Clone- Clone	h8b2	11.779	480.596	49.031	2741.029	19.065
Ctrl MO CO	Clone- Clone	h8b2	11.779	444.29	28.512	2501.612	19.065
Ctrl MO CO	Clone- Clone	h8b2	11.779	307.662	45.214	1325.408	19.065
Ctrl MO CO	Clone- Clone	h8b2	11.779	185.411	10.594	1490.979	19.065
Ctrl MO CO	Clone- Clone	h8b2	11.779	136.011	3.082	2547.381	19.065
Ctrl MO CO	Clone- Clone
Ctrl MO CO	Clone- Clone	h8b3	10.104	529.766	126.536	3228.153	16.342
Ctrl MO CO	Clone- Clone	h8b3	10.104	452.805	93.294	2217.733	16.342
Ctrl MO CO	Clone- Clone	h8b3	10.104	381.145	38.99	4093.719	16.342
Ctrl MO CO	Clone- Clone	h8b3	10.104	305.9	18.427	4094.91	16.342
Ctrl MO CO	Clone- Clone	h8b3	10.104	154.562	14.418	1050.108	16.342
Ctrl MO CO	Clone- Clone
Ctrl MO CO	Clone- Clone	h8b4	11.563	441.576	60.939	2670.018	18.714
Ctrl MO CO	Clone- Clone	h8b4	11.563	396.542	53.922	1697.478	18.714
Ctrl MO CO	Clone- Clone	h8b4	11.563	282.732	25.514	1359.676	18.714
Ctrl MO CO	Clone- Clone	h8b4	11.563	199.341	4.642	1217.055	18.714
Ctrl MO CO	Clone- Clone	h8b4	11.563	207.405	1.706	3551.872	18.714
Ctrl MO CO	Clone- Clone	h8b4	11.563	232.124	6.45	4095	18.714
Ctrl MO CO	Clone- Clone
Ctrl MO CO	Clone- Clone	h8b5	6.916	464.764	87.009	3056.607	11.158
Ctrl MO CO	Clone- Clone	h8b5	6.916	423.601	54.676	2672.274	11.158
Ctrl MO CO	Clone- Clone	h8b5	6.916	279.775	45.056	921.179	11.158
Ctrl MO CO	Clone- Clone	h8b5	6.916	251.22	25.506	2941.691	11.158
Ctrl MO CO	Clone- Clone	h8b5	6.916	237.786	17.768	2443.561	11.158
Ctrl MO CO	Clone- Clone
Ctrl MO CO	Clone- Clone	h8b6	6.376	499.371	41.674	1440.292	10.279
Ctrl MO CO	Clone- Clone	h8b6	6.376	451.418	80.71	1704.934	10.279
Ctrl MO CO	Clone- Clone	h8b6	6.376	391.045	87.131	2726.695	10.279
Ctrl MO CO	Clone- Clone	h8b6	6.376	428.851	30.22	3735.1	10.279
Ctrl MO CO	Clone- Clone	h8b6	6.376	390.436	21.384	3893.34	10.279
Ctrl MO CO	Clone- Clone
Ctrl MO CO	Clone- Clone	h8b7	7.187	560.71	65.431	4088.516	11.597
Ctrl MO CO	Clone- Clone	h8b7	7.187	402.546	49.244	2644.075	11.597
Ctrl MO CO	Clone- Clone	h8b7	7.187	203.402	35.083	834.65	11.597
Ctrl MO CO	Clone- Clone	h8b7	7.187	163.003	10.15	546.341	11.597
Ctrl MO CO	Clone- Clone	h8b7	7.187	130.89	0.962	451.06	11.597
Ctrl MO CO	Clone- Clone
Ctrl MO CO	Clone- Clone	h8b8	9.402	431.703	46.464	3310.82	15.199
Ctrl MO CO	Clone- Clone	h8b8	9.402	398.436	26.422	2238.671	15.199
Ctrl MO CO	Clone- Clone	h8b8	9.402	348.797	34.167	3965.724	15.199
Ctrl MO CO	Clone- Clone	h8b8	9.402	228.958	21.334	1092.282	15.199
Ctrl MO CO	Clone- Clone	h8b8	9.402	186.448	21.581	761.356	15.199
Ctrl MO PO	Non Clone- Clone	h8b1	5.403	356.942	51.486	2862.694	8.698
Ctrl MO PO	Non Clone- Clone	h8b1	5.403	214.558	27.156	1079.29	8.698
Ctrl MO PO	Non Clone- Clone	h8b1	5.403	163.468	22.235	428.936	8.698
Ctrl MO PO	Non Clone- Clone	h8b1	5.403	153.397	18.797	589.752	8.698
Ctrl MO PO	Non Clone- Clone	h8b1	5.403	163.224	5.774	733.569	8.698
Ctrl MO PO	Non Clone- Clone
Ctrl MO PO	Non Clone- Clone	h8b2	6.376	514.996	32.69	2805.921	10.279
Ctrl MO PO	Non Clone- Clone	h8b2	6.376	590.062	118.57	3529.996	10.279
Ctrl MO PO	Non Clone- Clone	h8b2	6.376	578.048	83.687	4087.916	10.279
Ctrl MO PO	Non Clone- Clone	h8b2	6.376	370.752	31.318	1248.757	10.279
Ctrl MO PO	Non Clone- Clone	h8b2	6.376	224.362	39.439	949.032	10.279
Ctrl MO PO	Non Clone- Clone	h8b2	6.376	158.926	34.376	559.094	10.279
Ctrl MO PO	Non Clone- Clone	h8b2	6.376	118.944	20.758	426.906	10.279
Ctrl MO NO	Non Clone- Non Clone	h8b1	10.483	409.937	80.883	2699.437	16.957
Ctrl MO NO	Non Clone- Non Clone	h8b1	10.483	398.858	42.475	1599.242	16.957
Ctrl MO NO	Non Clone- Non Clone	h8b1	10.483	349.395	28.667	1446.18	16.957
Ctrl MO NO	Non Clone- Non Clone	h8b1	10.483	306.335	12.189	2091.2	16.957
Ctrl MO NO	Non Clone- Non Clone	h8b1	10.483	220.534	8.084	1699.265	16.957
Ctrl MO NO	Non Clone- Non Clone	h8b1	10.483	118.466	1.983	1046.166	16.957
Ctrl MO NO	Non Clone- Non Clone
Ctrl MO NO	Non Clone- Non Clone	h8b2	11.185	443.151	77.647	1828.764	18.099
Ctrl MO NO	Non Clone- Non Clone	h8b2	11.185	408.466	50.797	3723.325	18.099
Ctrl MO NO	Non Clone- Non Clone	h8b2	11.185	370.106	42.095	3592.856	18.099
Ctrl MO NO	Non Clone- Non Clone	h8b2	11.185	317.092	19.405	2628.555	18.099
Ctrl MO NO	Non Clone- Non Clone	h8b2	11.185	247.476	19.063	1316.654	18.099
Ctrl MO NO	Non Clone- Non Clone	h8b2	11.185	186.145	6.761	1029.869	18.099
Ctrl MO NO	Non Clone- Non Clone	h8b2	11.185	135.576	3.421	1538.563	18.099
Ctrl MO NO	Non Clone- Non Clone
Ctrl MO NO	Non Clone- Non Clone	h8b3	8.754	440.576	47.049	3999.483	14.145
Ctrl MO NO	Non Clone- Non Clone	h8b3	8.754	379.596	34.235	3177.27	14.145
Ctrl MO NO	Non Clone- Non Clone	h8b3	8.754	308.26	23.882	2022.154	14.145
Ctrl MO NO	Non Clone- Non Clone	h8b3	8.754	246.127	9.533	1158.347	14.145
Ctrl MO NO	Non Clone- Non Clone	h8b3	8.754	145.01	5.608	1159.354	14.145
Ctrl MO NO	Non Clone- Non Clone	h8b3	8.754	88.16	0.243	2096.694	14.145
Ctrl MO NO	Non Clone- Non Clone	h8b3	8.754	70.255	0.004	2445.646	14.145
Ecad MO CO	Clone- Clone	h8b1	13.076	194.68	22.782	889.679	21.171
Ecad MO CO	Clone- Clone	h8b1	13.076	187.567	16.318	1325.461	21.171
Ecad MO CO	Clone- Clone	h8b1	13.076	174.441	3.346	979.348	21.171
Ecad MO CO	Clone- Clone	h8b1	13.076	169.861	5.1	837.812	21.171
Ecad MO CO	Clone- Clone	h8b1	13.076	168.424	2.699	744.255	21.171
Ecad MO CO	Clone- Clone	h8b1	13.076	165.879	4.322	956.782	21.171
Ecad MO CO	Clone- Clone
Ecad MO CO	Clone- Clone	h8b2	12.32	181.435	17.776	777.724	19.944
Ecad MO CO	Clone- Clone	h8b2	12.32	176.968	10.315	904.263	19.944
Ecad MO CO	Clone- Clone	h8b2	12.32	172.094	1.37	771.298	19.944
Ecad MO CO	Clone- Clone	h8b2	12.32	156.505	7.118	796.587	19.944
Ecad MO CO	Clone- Clone	h8b2	13.509	189.437	16.836	1662.16	21.877
Ecad MO CO	Clone- Clone	h8b2	13.509	133.071	2.145	858.211	21.877
Ecad MO CO	Clone- Clone	h8b2	13.509	111.988	1.752	442.649	21.877
Ecad MO CO	Clone- Clone	h8b2	13.509	86.352	1.158	472.73	21.877
Ecad MO CO	Clone- Clone	h8b2	13.509	66.992	0.197	373.687	21.877
Ecad MO CO	Clone- Clone
Ecad MO CO	Clone- Clone	h8b3	7.835	151.515	6.036	816.642	12.652
Ecad MO CO	Clone- Clone	h8b3	7.835	103.297	1.529	392.384	12.652
Ecad MO CO	Clone- Clone	h8b3	7.835	66.514	2.066	415.648	12.652
Ecad MO CO	Clone- Clone	h8b3	7.835	44.847	0.083	217.964	12.652
Ecad MO CO	Clone- Clone	h8b3	7.835	37.771	0.022	239.171	12.652
Ecad MO CO	Clone- Clone	h8b3	7.835	30.649	0	268.092	12.652
Ecad MO CO	Clone- Clone
Ecad MO CO	Clone- Clone	h8b4	8.537	165.234	3.283	1751.257	13.794
Ecad MO CO	Clone- Clone	h8b4	8.537	140.613	0.373	1049.101	13.794
Ecad MO CO	Clone- Clone	h8b4	8.537	79.318	1.173	416.667	13.794
Ecad MO CO	Clone- Clone	h8b4	8.537	65.163	0.285	341.331	13.794
Ecad MO CO	Clone- Clone	h8b4	8.537	51.873	0.142	272.456	13.794
Ecad MO CO	Clone- Clone
Ecad MO CO	Clone- Clone	h8b5	6.754	166.801	30.957	659.434	10.894
Ecad MO CO	Clone- Clone	h8b5	6.754	156.406	15.228	541.465	10.894
Ecad MO CO	Clone- Clone	h8b5	6.754	134.734	9.716	796.87	10.894
Ecad MO CO	Clone- Clone	h8b5	6.754	110.525	1.786	770.966	10.894
Ecad MO CO	Clone- Clone	h8b5	6.754	95.131	1.728	490.493	10.894
Ecad MO CO	Clone- Clone	h8b5	6.754	77.436	1.795	355.804	10.894
Ecad MO CO	Clone- Clone	h8b5	6.754	53.51	0.145	261.195	10.894
Ecad MO CO	Clone- Clone
Ecad MO CO	Clone- Clone	h8b6	10.645	141.27	2.689	538.767	17.22
Ecad MO CO	Clone- Clone	h8b6	10.645	148.852	3.897	911.409	17.22
Ecad MO CO	Clone- Clone	h8b6	10.645	114.552	6.004	622.304	17.22
Ecad MO CO	Clone- Clone	h8b6	10.645	89.64	3.031	317.831	17.22
Ecad MO CO	Clone- Clone	h8b6	10.645	78.349	3.526	316.336	17.22
Ecad MO CO	Clone- Clone	h8b6	10.645	69.752	2.229	308.218	17.22
Ecad MO CO	Clone- Clone	h8b6	10.645	61.138	1.46	315.17	17.22
Ecad MO CO	Clone- Clone	h8b6	10.645	59.401	0.025	420.733	17.22
Ecad MO CO	Clone- Clone
Ecad MO CO	Clone- Clone	h8b7	10.645	166.272	15.748	679.62	17.22
Ecad MO CO	Clone- Clone	h8b7	10.645	153.888	4.307	697.133	17.22
Ecad MO CO	Clone- Clone	h8b7	10.645	140.217	5.91	973.665	17.22
Ecad MO CO	Clone- Clone	h8b7	10.645	124.048	3.774	653.673	17.22
Ecad MO CO	Clone- Clone	h8b7	10.645	110.127	10.184	477.937	17.22
Ecad MO CO	Clone- Clone	h8b7	10.645	96.994	5.716	465.009	17.22
Ecad MO CO	Clone- Clone
Ecad MO CO	Clone- Clone	h8b8	9.348	140.381	6.996	650.802	15.112
Ecad MO CO	Clone- Clone	h8b8	9.348	175.132	3.346	1141.495	15.112
Ecad MO CO	Clone- Clone	h8b8	9.348	163.926	6.092	771.662	15.112
Ecad MO CO	Clone- Clone	h8b8	9.348	138.742	6.581	586.022	15.112
Ecad MO CO	Clone- Clone	h8b8	9.348	104.803	13.592	574.903	15.112
Ecad MO CO	Clone- Clone	h8b8	9.348	89.403	5.539	479.206	15.112
Ecad MO PO	Non Clone- Clone	h8b1	8.645	319.738	48.532	2369.244	13.97
Ecad MO PO	Non Clone- Clone	h8b1	8.645	266.577	34.207	1958.281	13.97
Ecad MO PO	Non Clone- Clone	h8b1	8.645	190.768	4.014	1097.002	13.97
Ecad MO PO	Non Clone- Clone	h8b1	8.645	121.895	1.408	735.412	13.97
Ecad MO PO	Non Clone- Clone
Ecad MO PO	Non Clone- Clone	h8b2	9.132	417.632	47.142	3301.765	14.76
Ecad MO PO	Non Clone- Clone	h8b2	9.132	379.192	46.197	2003.552	14.76
Ecad MO PO	Non Clone- Clone	h8b2	9.132	273.006	11.179	1214.425	14.76
Ecad MO PO	Non Clone- Clone	h8b2	9.132	195.096	10.05	1154.388	14.76
Ecad MO PO	Non Clone- Clone	h8b2	9.132	146.885	10.392	1972.942	14.76
Ecad MO PO	Non Clone- Clone	h8b2	9.132	95.104	2.711	1242.51	14.76
Ecad MO PO	Non Clone- Clone
Ecad MO PO	Non Clone- Clone	h8b3	10.321	405.458	27.052	2065.454	16.693
Ecad MO PO	Non Clone- Clone	h8b3	10.321	356.765	41.748	1759.557	16.693
Ecad MO PO	Non Clone- Clone	h8b3	11.131	358.286	44.921	3216.925	18.011
Ecad MO PO	Non Clone- Clone	h8b3	11.131	271.738	37.779	1016.848	18.011
Ecad MO PO	Non Clone- Clone	h8b3	11.131	216.266	31.056	1613.334	18.011
Ecad MO PO	Non Clone- Clone	h8b3	11.131	185.198	24.163	1873.825	18.011
Ecad MO PO	Non Clone- Clone	h8b3	11.131	169.252	7.663	1975.123	18.011
Ecad MO PO	Non Clone- Clone
Ecad MO PO	Non Clone- Clone	h8b4	10.699	520.934	58.158	2483.771	17.308
Ecad MO PO	Non Clone- Clone	h8b4	10.699	476.627	71.069	4071.975	17.308
Ecad MO PO	Non Clone- Clone	h8b4	10.699	328.948	45.042	2695.664	17.308
Ecad MO PO	Non Clone- Clone	h8b4	10.699	245.249	13.961	2401.222	17.308
Ecad MO PO	Non Clone- Clone	h8b4	10.699	197.131	19.444	1399.733	17.308
Ecad MO PO	Non Clone- Clone	h8b4	10.699	150.827	5.046	582.898	17.308
Ecad MO PO	Non Clone- Clone
Ecad MO PO	Non Clone- Clone	h8b5	18.966	382.116	10.963	1999.739	30.75
Ecad MO PO	Non Clone- Clone	h8b5	18.966	387.771	19.863	3098.475	30.75
Ecad MO PO	Non Clone- Clone	h8b5	18.966	384.502	19.961	3399.476	30.75
Ecad MO PO	Non Clone- Clone	h8b5	18.966	353.124	27.055	3577.486	30.75
Ecad MO PO	Non Clone- Clone	h8b5	18.966	243.803	10.959	2425.718	30.75
Ecad MO PO	Non Clone- Clone	h8b5	18.966	146.501	3.335	644.533	30.75
Ecad MO PO	Non Clone- Clone	h8b5	18.966	114.963	0.722	3663.782	30.75
Ecad MO PO	Non Clone- Clone
Ecad MO PO	Non Clone- Clone	h8b6	12.482	402.77	53.29	2894.124	20.207
Ecad MO PO	Non Clone- Clone	h8b6	12.482	396.31	59.284	2390.547	20.207
Ecad MO PO	Non Clone- Clone	h8b6	12.482	291.583	29.268	1122.864	20.207
Ecad MO PO	Non Clone- Clone	h8b6	12.482	235.079	29.513	904.347	20.207
Ecad MO PO	Non Clone- Clone
Ecad MO PO	Non Clone- Clone	h8b9	13.563	323.429	15.88	4095	21.965
Ecad MO PO	Non Clone- Clone	h8b9	13.563	308.842	16.509	4095	21.965
Ecad MO PO	Non Clone- Clone	h8b9	13.563	284.024	17.603	3581.533	21.965
Ecad MO PO	Non Clone- Clone	h8b9	13.563	237.914	24.034	1662.88	21.965
Ecad MO PO	Non Clone- Clone	h8b9	13.563	184.865	4.603	1811.249	21.965
Ecad MO PO	Non Clone- Clone	h8b9	13.563	151.352	5.896	1043.291	21.965
Ecad MO PO	Non Clone- Clone
Ecad MO PO	Non Clone- Clone	h8b10	10.212	433.773	14.887	2981.996	16.507
Ecad MO PO	Non Clone- Clone	h8b10	10.212	401.201	53.098	1424.977	16.507
Ecad MO PO	Non Clone- Clone	h8b10	10.212	362.144	16.883	1351.373	16.507
Ecad MO PO	Non Clone- Clone	h8b10	10.212	297.157	13.915	2127.807	16.507
Ecad MO PO	Non Clone- Clone	h8b10	10.212	276.866	8.333	1337.729	16.507
Ecad MO PO	Non Clone- Clone	h8b10	10.212	262.883	1.325	1349.709	16.507
Ecad MO PO	Non Clone- Clone	h8b10	10.212	237.013	6.044	1496.741	16.507
Ecad MO NO	Non Clone- Non Clone	h8b1	8.862	586.585	78.286	3041.286	14.32
Ecad MO NO	Non Clone- Non Clone	h8b1	8.862	514.818	37.586	1597.403	14.32
Ecad MO NO	Non Clone- Non Clone	h8b1	8.862	387.079	34.76	1759.597	14.32
Ecad MO NO	Non Clone- Non Clone	h8b1	8.862	291.456	14.617	1535.26	14.32
Ecad MO NO	Non Clone- Non Clone	h8b1	8.862	200.96	21.359	847.893	14.32
Ecad MO NO	Non Clone- Non Clone
Ecad MO NO	Non Clone- Non Clone	h8b2	11.293	563.18	92.112	4046.257	18.275
Ecad MO NO	Non Clone- Non Clone	h8b2	11.293	595.063	54.626	4094.674	18.275
Ecad MO NO	Non Clone- Non Clone	h8b2	11.293	517.453	25.478	3115.357	18.275
Ecad MO NO	Non Clone- Non Clone	h8b2	11.293	458.816	62.982	2439.473	18.275
Ecad MO NO	Non Clone- Non Clone	h8b2	11.293	379.731	31.098	1407.234	18.275
Ecad MO NO	Non Clone- Non Clone	h8b2	11.293	295.782	29.652	2972.769	18.275
Ecad MO NO	Non Clone- Non Clone	h8b2	11.293	238.046	8.074	3248.674	18.275
Ecad MO NO	Non Clone- Non Clone
Ecad MO NO	Non Clone- Non Clone	h8b3	15.238	392.673	33.216	3144.562	24.688
Ecad MO NO	Non Clone- Non Clone	h8b3	15.238	401.487	25.786	3626.365	24.688
Ecad MO NO	Non Clone- Non Clone	h8b3	15.238	332.393	30.606	4095	24.688
Ecad MO NO	Non Clone- Non Clone	h8b3	15.238	263.33	13.911	4094.821	24.688
Ecad MO NO	Non Clone- Non Clone	h8b3	15.238	210.571	22.452	3812.269	24.688
Ecad MO NO	Non Clone- Non Clone
Ecad MO NO	Non Clone- Non Clone	h8b4	6.43	448.665	43.672	3843.666	10.367
Ecad MO NO	Non Clone- Non Clone	h8b4	6.43	304.594	16.969	2164.64	10.367
Ecad MO NO	Non Clone- Non Clone	h8b4	6.43	239.569	9.588	3113.92	10.367
Ecad MO NO	Non Clone- Non Clone	h8b4	6.43	197.906	3.784	2216.926	10.367
Ecad MO NO	Non Clone- Non Clone	h8b4	6.43	191.064	0.906	3540.825	10.367
