# Supplementary material for: Stepwise polarisation of developing bilayered epidermis is mediated by aPKC and E-cadherin in zebrafish
Source: eLife journal article supplement (doi:10.7554/elife.49064), 2020-01-22
Supplement: fig4-figsupp2-data7 [file elife-49064-fig4-figsupp2-data7-v1.csv]

Genotype	Boundary	Cell name	Area	Mean	Min	Max	Length
Ctrl MO CO	Clone- Clone	h2b1	6.106	405.144	51.938	1084.676	9.84
Ctrl MO CO	Clone- Clone	h2b1	6.106	629.467	169.989	1905.726	9.84
Ctrl MO CO	Clone- Clone	h2b1	6.106	695.385	158.869	2183.572	9.84
Ctrl MO CO	Clone- Clone	h2b1	6.106	727.531	155.587	2343.696	9.84
Ctrl MO CO	Clone- Clone	h2b1	6.106	681.232	120.083	2403.676	9.84
Ctrl MO CO	Clone- Clone	h2b1	6.106	556.974	82.917	1713.448	9.84
Ctrl MO CO	Clone- Clone
Ctrl MO CO	Clone- Clone	h2b2	8.754	561.374	119.523	1909.252	14.145
Ctrl MO CO	Clone- Clone	h2b2	8.754	552.91	136.873	2003.99	14.145
Ctrl MO CO	Clone- Clone	h2b2	8.754	511.533	136.789	2196.758	14.145
Ctrl MO CO	Clone- Clone	h2b2	7.781	699.134	166.378	2095.409	12.564
Ctrl MO CO	Clone- Clone	h2b2	7.781	623.05	203.387	1802.289	12.564
Ctrl MO CO	Clone- Clone	h2b2	7.781	559.184	130.671	1581.216	12.564
Ctrl MO CO	Clone- Clone
Ctrl MO CO	Clone- Clone	h2b3	3.674	408.84	29.501	1244.797	5.887
Ctrl MO CO	Clone- Clone	h2b3	3.674	516.589	38.647	1720.667	5.887
Ctrl MO CO	Clone- Clone	h2b3	3.674	647.79	87.397	2037.078	5.887
Ctrl MO CO	Clone- Clone	h2b3	3.674	652.338	119.983	1766.825	5.887
Ctrl MO CO	Clone- Clone	h2b3	3.674	580.075	140.964	2310.622	5.887
Ctrl MO CO	Clone- Clone	h2b3	3.674	565.176	127.251	1742.092	5.887
Ctrl MO CO	Clone- Clone
Ctrl MO CO	Clone- Clone	h2b4	12.644	220.814	19.177	1100.215	20.471
Ctrl MO CO	Clone- Clone	h2b4	12.644	282.072	12.826	1700.817	20.471
Ctrl MO CO	Clone- Clone	h2b4	12.644	336.484	35.346	1686.973	20.471
Ctrl MO CO	Clone- Clone	h2b4	12.59	458.856	76.338	1579.104	20.383
Ctrl MO CO	Clone- Clone	h2b4	12.59	535.368	91.085	2009.148	20.383
Ctrl MO CO	Clone- Clone	h2b4	12.59	551.44	86.986	2140.66	20.383
Ctrl MO CO	Clone- Clone
Ctrl MO CO	Clone- Clone	h2b5	7.565	142.94	2.136	580.428	12.183
Ctrl MO CO	Clone- Clone	h2b5	7.565	212.701	18.244	815.219	12.183
Ctrl MO CO	Clone- Clone	h2b5	7.565	296.818	39.671	1158.622	12.183
Ctrl MO CO	Clone- Clone	h2b5	7.565	408.378	43.95	1491.228	12.183
Ctrl MO CO	Clone- Clone	h2b5	7.565	487.457	52.841	2048.094	12.183
Ctrl MO CO	Clone- Clone	h2b5	7.565	423.64	53.418	3042.845	12.183
Ctrl MO CO	Clone- Clone	h2b5	7.565	313.868	49.71	2318.063	12.183
Ctrl MO CO	Clone- Clone
Ctrl MO CO	Clone- Clone	h2b6	10.861	97.69	7.533	450.269	17.572
Ctrl MO CO	Clone- Clone	h2b6	10.861	248.924	12.113	849.198	17.572
Ctrl MO CO	Clone- Clone	h2b6	10.861	323.992	36.195	1063.083	17.572
Ctrl MO CO	Clone- Clone	h2b6	10.861	370.599	56.102	1317.323	17.572
Ctrl MO CO	Clone- Clone	h2b6	10.861	367.403	54.86	1401.027	17.572
Ctrl MO CO	Clone- Clone	h2b6	11.293	598.029	119.506	1577.914	18.275
Ctrl MO CO	Clone- Clone	h2b6	11.293	570.026	116.099	1707.169	18.275
Ctrl MO CO	Clone- Clone	h2b6	11.293	489.118	103.132	1461.553	18.275
Ctrl MO CO	Clone- Clone
Ctrl MO CO	Clone- Clone	h2b7	7.403	140.612	10.578	509.938	11.949
Ctrl MO CO	Clone- Clone	h2b7	7.403	257.699	21.222	789.852	11.949
Ctrl MO CO	Clone- Clone	h2b7	7.403	292.051	35.586	1127.691	11.949
Ctrl MO CO	Clone- Clone	h2b7	7.403	319.14	27.459	1406.028	11.949
Ctrl MO CO	Clone- Clone	h2b7	7.997	540.038	103.878	1690.323	12.915
Ctrl MO CO	Clone- Clone	h2b7	7.997	470.21	110.054	1393.54	12.915
Ctrl MO CO	Clone- Clone
Ctrl MO CO	Clone- Clone	h2b8	7.295	384.333	44.083	1271.693	11.773
Ctrl MO CO	Clone- Clone	h2b8	7.295	478.43	70.069	1727.134	11.773
Ctrl MO CO	Clone- Clone	h2b8	7.295	613.189	126.387	2638.452	11.773
Ctrl MO CO	Clone- Clone	h2b8	7.295	756.474	38.444	2870.723	11.773
Ctrl MO CO	Clone- Clone	h2b8	7.295	830.423	183.017	4095	11.773
Ctrl MO CO	Clone- Clone	h2b8	7.295	726.83	134.542	3655.306	11.773
Ctrl MO CO	Clone- Clone
Ctrl MO CO	Clone- Clone	h2b9	12.158	254.665	28.894	1209.393	19.673
Ctrl MO CO	Clone- Clone	h2b9	12.158	331.244	44.351	1335.068	19.673
Ctrl MO CO	Clone- Clone	h2b9	12.158	436.161	102.295	1799.36	19.673
Ctrl MO CO	Clone- Clone	h2b9	12.158	522.409	94.207	2349.804	19.673
Ctrl MO CO	Clone- Clone	h2b9	12.05	665.191	76.02	2762.04	19.494
Ctrl MO CO	Clone- Clone	h2b9	12.05	627.205	128.393	2410.554	19.494
Ctrl MO CO	Clone- Clone	h2b9	12.05	569.72	86.442	2246.558	19.494
Ctrl MO CO	Clone- Clone	h2b9	12.05	514.775	52.724	2499.876	19.494
Ctrl MO CO	Clone- Clone	h2b9	12.05	423.652	26.055	2160.949	19.494
Ctrl MO CO	Clone- Clone
Ctrl MO CO	Clone- Clone	h2b10	13.941	94.004	1.151	352.068	22.571
Ctrl MO CO	Clone- Clone	h2b10	13.941	149.019	5.594	482.83	22.571
Ctrl MO CO	Clone- Clone	h2b10	13.941	245.626	1.579	843.478	22.571
Ctrl MO CO	Clone- Clone	h2b10	13.941	295.94	6.72	1389.752	22.571
Ctrl MO CO	Clone- Clone	h2b10	13.941	288.305	46.489	1251.692	22.571
Ctrl MO CO	Clone- Clone	h2b10	14.319	558.387	88.084	2120.959	23.191
Ctrl MO CO	Clone- Clone	h2b10	14.319	561.944	97.851	1973.991	23.191
Ctrl MO CO	Clone- Clone	h2b10	14.319	463.831	89.952	2439.317	23.191
Ctrl MO CO	Clone- Clone
Ctrl MO CO	Clone- Clone	h2b11	5.674	190.049	13.695	509.802	9.137
Ctrl MO CO	Clone- Clone	h2b11	5.674	298.625	20.013	1080.104	9.137
Ctrl MO CO	Clone- Clone	h2b11	5.674	438.146	43.439	1873.113	9.137
Ctrl MO CO	Clone- Clone	h2b11	5.674	472.789	105.134	1580.245	9.137
Ctrl MO CO	Clone- Clone	h2b11	5.674	503.843	90.758	1859.916	9.137
Ctrl MO CO	Clone- Clone	h2b11	5.674	456.783	82.88	1474.287	9.137
Ctrl MO CO	Clone- Clone	h2b11	5.674	325.846	60.055	1103.722	9.137
Ctrl MO CO	Clone- Clone
Ctrl MO CO	Clone- Clone	h2b12	9.132	146.878	5.687	570.343	14.76
Ctrl MO CO	Clone- Clone	h2b12	9.132	265.423	14.914	763.277	14.76
Ctrl MO CO	Clone- Clone	h2b12	9.132	345.043	32.385	1659.944	14.76
Ctrl MO CO	Clone- Clone	h2b12	9.132	369.32	35.131	1919.413	14.76
Ctrl MO CO	Clone- Clone	h2b12	9.132	420.598	59.192	1569.583	14.76
Ctrl MO CO	Clone- Clone	h2b12	9.132	467.439	80.751	2398.444	14.76
Ctrl MO CO	Clone- Clone	h2b12	9.132	416.474	81.207	1662.89	14.76
Ctrl MO CO	Clone- Clone
Ctrl MO CO	Clone- Clone	h2b13	4.431	85.097	0.322	224.696	7.116
Ctrl MO CO	Clone- Clone	h2b13	4.431	176.649	13.707	586.41	7.116
Ctrl MO CO	Clone- Clone	h2b13	4.431	281.274	55.324	1500.169	7.116
Ctrl MO CO	Clone- Clone	h2b13	4.431	332.071	54.094	1727.065	7.116
Ctrl MO CO	Clone- Clone	h2b13	4.431	420.512	101.627	1455.678	7.116
Ctrl MO CO	Clone- Clone	h2b13	4.431	590.079	148.788	1534.478	7.116
Ctrl MO CO	Clone- Clone	h3b1	12.698	489.895	50.044	2480.182	20.559
Ctrl MO CO	Clone- Clone	h3b1	12.698	440.339	56.873	2286.776	20.559
Ctrl MO CO	Clone- Clone	h3b1	12.698	374.062	46.83	1804.008	20.559
Ctrl MO CO	Clone- Clone	h3b1	12.698	253.813	41.199	1204.419	20.559
Ctrl MO CO	Clone- Clone	h3b1	12.698	175.107	3.185	2004.52	20.559
Ctrl MO CO	Clone- Clone
Ctrl MO CO	Clone- Clone	h3b2	16.643	315.836	20.586	894.952	26.972
Ctrl MO CO	Clone- Clone	h3b2	16.643	298.305	16.764	1335.489	26.972
Ctrl MO CO	Clone- Clone	h3b2	16.643	258.589	9.135	1370.685	26.972
Ctrl MO CO	Clone- Clone	h3b2	16.643	170.433	0.587	716.848	26.972
Ctrl MO CO	Clone- Clone	h3b2	16.643	102.719	0.049	634.493	26.972
Ctrl MO CO	Clone- Clone
Ctrl MO CO	Clone- Clone	h3b3	4.377	300.968	50.202	1635.072	7.029
Ctrl MO CO	Clone- Clone	h3b3	4.377	262.898	31.439	1901.462	7.029
Ctrl MO CO	Clone- Clone	h3b3	4.377	222.557	14.983	1534.228	7.029
Ctrl MO CO	Clone- Clone	h3b3	4.377	146.207	11.788	494.996	7.029
Ctrl MO CO	Clone- Clone	h3b4	7.943	165.478	3.697	920.151	12.827
Ctrl MO CO	Clone- Clone	h3b4	7.943	155.147	10.256	1247.877	12.827
Ctrl MO CO	Clone- Clone	h3b4	7.727	346.05	43.053	1321.873	12.476
Ctrl MO CO	Clone- Clone	h3b4	7.727	384.98	43.786	1455.711	12.476
Ctrl MO CO	Clone- Clone	h3b4	7.727	308.034	24.86	888.995	12.476
Ctrl MO CO	Clone- Clone
Ctrl MO CO	Clone- Clone	h3b5	5.241	182.808	11.396	660.588	8.434
Ctrl MO CO	Clone- Clone	h3b5	5.241	240.203	6.86	1163.124	8.434
Ctrl MO CO	Clone- Clone	h3b5	5.241	261.452	16.958	1243.217	8.434
Ctrl MO CO	Clone- Clone	h3b5	5.241	314.16	28.021	968.855	8.434
Ctrl MO CO	Clone- Clone	h3b5	5.241	383.073	2.236	1011.167	8.434
Ctrl MO CO	Clone- Clone	h4b1	16.156	243.92	13.351	904.555	26.182
Ctrl MO CO	Clone- Clone	h4b1	16.156	389.908	31.755	1508.188	26.182
Ctrl MO CO	Clone- Clone	h4b1	16.156	461.767	53.546	1471.079	26.182
Ctrl MO CO	Clone- Clone	h4b1	16.156	498.438	71.578	1624.873	26.182
Ctrl MO CO	Clone- Clone	h4b1	16.156	490.388	48.041	2979.014	26.182
Ctrl MO CO	Clone- Clone	h4b1	16.156	327.148	15.716	1400.108	26.182
Ctrl MO CO	Clone- Clone	h4b1	16.156	184.406	19.58	1010.982	26.182
Ctrl MO CO	Clone- Clone
Ctrl MO CO	Clone- Clone	h4b2	6.592	457.078	71.168	1506.346	10.631
Ctrl MO CO	Clone- Clone	h4b2	6.592	545.769	117.686	1781.261	10.631
Ctrl MO CO	Clone- Clone	h4b2	6.592	568.371	105.082	2325.924	10.631
Ctrl MO CO	Clone- Clone	h4b2	6.592	563.325	69.316	2111.511	10.631
Ctrl MO CO	Clone- Clone	h4b2	6.592	417.349	71.302	3018.415	10.631
Ctrl MO CO	Clone- Clone
Ctrl MO CO	Clone- Clone	h4b3	8.105	260.025	16.483	972.737	13.09
Ctrl MO CO	Clone- Clone	h4b3	8.105	372.508	51.31	2080.338	13.09
Ctrl MO CO	Clone- Clone	h4b3	8.105	375.081	41.806	1978.191	13.09
Ctrl MO CO	Clone- Clone	h4b3	8.429	535.523	135.071	1514.341	13.616
Ctrl MO CO	Clone- Clone	h4b3	8.429	501.038	64.823	1472.136	13.616
Ctrl MO CO	Clone- Clone	h4b3	8.429	333.04	34.67	1162.59	13.616
Ctrl MO CO	Clone- Clone	h5b1	9.996	205.506	6.147	788.044	16.166
Ctrl MO CO	Clone- Clone	h5b1	9.996	297.361	37.978	1191.377	16.166
Ctrl MO CO	Clone- Clone	h5b1	9.996	432.929	24.642	1570.99	16.166
Ctrl MO CO	Clone- Clone	h5b1	9.996	549.135	32.542	1667.964	16.166
Ctrl MO CO	Clone- Clone	h5b1	9.996	568.219	50.685	2007.142	16.166
Ctrl MO CO	Clone- Clone	h5b1	9.996	580.708	96.75	2924.281	16.166
Ctrl MO CO	Clone- Clone	h5b1	9.996	556.09	82.214	2758.501	16.166
Ctrl MO CO	Clone- Clone
Ctrl MO CO	Clone- Clone	h5b2	8.213	275.43	38.383	1290.081	13.263
Ctrl MO CO	Clone- Clone	h5b2	8.213	415.345	22.75	1575.376	13.263
Ctrl MO CO	Clone- Clone	h5b2	8.213	548.022	85.736	2292.895	13.263
Ctrl MO CO	Clone- Clone	h5b2	8.213	624.054	121.633	2195.814	13.263
Ctrl MO CO	Clone- Clone	h5b2	8.213	559.619	98.567	2424.758	13.263
Ctrl MO CO	Clone- Clone
Ctrl MO CO	Clone- Clone	h5b3	8.213	275.43	38.383	1290.081	13.263
Ctrl MO CO	Clone- Clone	h5b3	8.213	415.345	22.75	1575.376	13.263
Ctrl MO CO	Clone- Clone	h5b3	8.213	548.022	85.736	2292.895	13.263
Ctrl MO CO	Clone- Clone	h5b3	8.213	624.054	121.633	2195.814	13.263
Ctrl MO CO	Clone- Clone	h5b3	8.213	559.619	98.567	2424.758	13.263
Ctrl MO CO	Clone- Clone	h5b3	8.375	198.087	7.195	649.839	13.53
Ctrl MO CO	Clone- Clone	h5b3	8.375	276.874	10.763	966.226	13.53
Ctrl MO CO	Clone- Clone	h5b3	8.375	341.223	33.828	1358.566	13.53
Ctrl MO CO	Clone- Clone	h5b3	8.375	382.418	38.12	1727.863	13.53
Ctrl MO CO	Clone- Clone	h5b3	8.321	385.364	58.892	1587.335	13.442
Ctrl MO CO	Clone- Clone	h5b3	8.321	475.537	72.421	1863.997	13.442
Ctrl MO CO	Clone- Clone	h5b3	8.321	489.499	46.947	1593.123	13.442
Ctrl MO CO	Clone- Clone
Ctrl MO CO	Clone- Clone	h5b4	11.347	174.278	13.135	826.488	18.362
Ctrl MO CO	Clone- Clone	h5b4	11.347	269.078	3.47	1867.557	18.362
Ctrl MO CO	Clone- Clone	h5b4	11.347	360.754	30.744	2460.772	18.362
Ctrl MO CO	Clone- Clone	h5b4	11.347	464.524	49.356	3089.558	18.362
Ctrl MO CO	Clone- Clone	h5b4	11.347	523.889	67.729	2409.938	18.362
Ctrl MO CO	Clone- Clone	h5b4	11.347	505.808	83.52	1805.63	18.362
Ctrl MO CO	Clone- Clone	h5b4	11.347	486.893	81.718	2095.193	18.362
Ctrl MO CO	Clone- Clone
Ctrl MO CO	Clone- Clone	h5b5	6.808	406.835	95.773	1172.143	10.982
Ctrl MO CO	Clone- Clone	h5b5	6.808	536.527	119.365	1639.973	10.982
Ctrl MO CO	Clone- Clone	h5b5	6.808	732.876	182.517	2255.276	10.982
Ctrl MO CO	Clone- Clone	h5b5	6.808	759.152	155.953	1805.589	10.982
Ctrl MO CO	Clone- Clone	h5b5	6.808	689.022	153.985	2007.39	10.982
Ctrl MO CO	Clone- Clone	h5b5	6.808	641.202	153.494	1669.484	10.982
Ctrl MO CO	Clone- Clone	h5b5	6.808	552.166	66.654	1608.682	10.982
Ctrl MO CO	Clone- Clone
Ctrl MO CO	Clone- Clone	h5b6	9.618	366.908	67.095	1021.321	15.551
Ctrl MO CO	Clone- Clone	h5b6	9.618	518.963	116.87	1355.87	15.551
Ctrl MO CO	Clone- Clone	h5b6	9.618	598.097	175.767	2461.299	15.551
Ctrl MO CO	Clone- Clone	h5b6	8.7	694.081	76.634	3939.535	14.057
Ctrl MO CO	Clone- Clone	h5b6	8.7	688.124	105.093	3837.088	14.057
Ctrl MO CO	Clone- Clone	h5b6	8.7	531.525	79.986	2108.759	14.057
Ctrl MO CO	Clone- Clone
Ctrl MO CO	Clone- Clone	h5b7	9.402	200.577	31.264	554.402	15.199
Ctrl MO CO	Clone- Clone	h5b7	9.402	339.574	69.359	1003.214	15.199
Ctrl MO CO	Clone- Clone	h5b7	9.402	465.191	81.031	1629.619	15.199
Ctrl MO CO	Clone- Clone	h5b7	9.402	526.053	67.477	2124.908	15.199
Ctrl MO CO	Clone- Clone	h5b7	9.24	534.802	70.623	2023.194	14.936
Ctrl MO CO	Clone- Clone	h5b7	9.24	552.281	107.072	2211.406	14.936
Ctrl MO CO	Clone- Clone	h5b7	9.24	499.756	118.546	1449.46	14.936
Ctrl MO CO	Clone- Clone	h5b7	9.24	417.286	90.199	1747.375	14.936
Ctrl MO CO	Clone- Clone
Ctrl MO CO	Clone- Clone	h5b8	12.968	148.971	13.15	523.142	20.998
Ctrl MO CO	Clone- Clone	h5b8	12.968	229.451	28.03	680.359	20.998
Ctrl MO CO	Clone- Clone	h5b8	12.968	324.238	55.134	982.487	20.998
Ctrl MO CO	Clone- Clone	h5b8	12.968	493.521	85.766	2713.495	20.998
Ctrl MO CO	Clone- Clone	h5b8	12.968	756.279	95.739	2622.935	20.998
Ctrl MO CO	Clone- Clone	h5b8	12.968	760.34	106.302	3081.703	20.998
Ctrl MO CO	Clone- Clone	h5b8	12.968	681.181	113.918	2507.253	20.998
Ctrl MO CO	Clone- Clone	h5b8	12.968	545.404	86.602	3078.104	20.998
Ctrl MO CO	Clone- Clone
Ctrl MO CO	Clone- Clone	h5b9	9.942	294.976	17.416	1012.708	16.078
Ctrl MO CO	Clone- Clone	h5b9	9.942	433.166	30.459	1680.849	16.078
Ctrl MO CO	Clone- Clone	h5b9	9.942	581.897	56.822	2780.519	16.078
Ctrl MO CO	Clone- Clone	h5b9	9.942	666.863	84.392	3934.333	16.078
Ctrl MO CO	Clone- Clone	h5b9	9.888	862.797	95.131	3667.831	15.99
Ctrl MO CO	Clone- Clone	h5b9	9.888	750.804	67.019	3606.114	15.99
Ctrl MO CO	Clone- Clone
Ctrl MO CO	Clone- Clone	h5b10	12.86	189.103	12.401	628.273	20.822
Ctrl MO CO	Clone- Clone	h5b10	12.86	291.898	27.518	957.019	20.822
Ctrl MO CO	Clone- Clone	h5b10	12.86	413.825	34.118	1521.22	20.822
Ctrl MO CO	Clone- Clone	h5b10	12.86	529.577	49.505	3047.644	20.822
Ctrl MO CO	Clone- Clone	h5b10	12.86	525.714	88.704	2129.781	20.822
Ctrl MO CO	Clone- Clone	h5b10	12.86	496.656	40.411	2470.892	20.822
Ctrl MO CO	Clone- Clone	h5b10	12.86	439.925	64.198	1753.171	20.822
Ctrl MO CO	Clone- Clone	h5b10	12.86	365.636	26.001	3125.375	20.822
Ctrl MO CO	Clone- Clone
Ctrl MO CO	Clone- Clone	h5b11	9.348	156.982	4.944	585.681	15.112
Ctrl MO CO	Clone- Clone	h5b11	9.348	255.715	33.888	813.834	15.112
Ctrl MO CO	Clone- Clone	h5b11	9.348	365.227	25.578	1463.311	15.112
Ctrl MO CO	Clone- Clone	h5b11	9.348	485.273	79.909	2263.032	15.112
Ctrl MO CO	Clone- Clone	h5b11	9.348	607.336	93.374	1767.297	15.112
Ctrl MO CO	Clone- Clone	h5b11	9.348	603.865	79.147	1872.367	15.112
Ctrl MO CO	Clone- Clone	h5b11	9.348	537.943	108.625	1888.588	15.112
Ctrl MO CO	Clone- Clone	h5b11	9.348	377.655	55.15	1670.692	15.112
Ctrl MO CO	Clone- Clone
Ctrl MO CO	Clone- Clone	h5b12	11.293	263.928	32.536	1104.072	18.275
Ctrl MO CO	Clone- Clone	h5b12	11.293	347.283	41.347	1476.725	18.275
Ctrl MO CO	Clone- Clone	h5b12	11.293	423.189	40.741	1529.051	18.275
Ctrl MO CO	Clone- Clone	h5b12	11.293	522.942	57.727	3849.07	18.275
Ctrl MO CO	Clone- Clone	h5b12	11.293	530.702	67.931	4061.769	18.275
Ctrl MO CO	Clone- Clone	h5b12	11.293	512.886	87.453	3539.666	18.275
Ctrl MO CO	Clone- Clone	h5b12	11.293	427.135	23.718	2353.654	18.275
Ctrl MO CO	Clone- Clone
Ctrl MO CO	Clone- Clone	h5b13	9.618	318.591	19.779	1261.924	15.551
Ctrl MO CO	Clone- Clone	h5b13	9.618	426.152	19.393	2813.667	15.551
Ctrl MO CO	Clone- Clone	h5b13	9.618	563.618	28.19	3499.863	15.551
Ctrl MO CO	Clone- Clone	h5b13	9.618	723.607	65.065	3885.217	15.551
Ctrl MO CO	Clone- Clone	h5b13	9.618	687.432	46.954	3530.978	15.551
Ctrl MO CO	Clone- Clone	h5b13	9.618	554.286	57.896	3333.692	15.551
Ctrl MO CO	Clone- Clone	h5b13	9.618	428.942	75.122	4007.145	15.551
Ctrl MO CO	Clone- Clone
Ctrl MO CO	Clone- Clone	h5b14	4.593	269.083	38.012	913.599	7.371
Ctrl MO CO	Clone- Clone	h5b14	4.593	390.946	80.926	1162.761	7.371
Ctrl MO CO	Clone- Clone	h5b14	4.593	482.279	127.626	1827.773	7.371
Ctrl MO CO	Clone- Clone	h5b14	4.593	436.407	140.618	1297.475	7.371
Ctrl MO CO	Clone- Clone	h5b14	4.593	427.505	132.073	1243.681	7.371
Ctrl MO CO	Clone- Clone
Ctrl MO CO	Clone- Clone	h5b15	9.618	238.141	20.331	718.657	15.551
Ctrl MO CO	Clone- Clone	h5b15	9.618	368.441	44.533	1467.019	15.551
Ctrl MO CO	Clone- Clone	h5b15	9.618	503.796	93.349	2619.682	15.551
Ctrl MO CO	Clone- Clone	h5b15	9.618	615.486	130.129	2625.939	15.551
Ctrl MO CO	Clone- Clone	h5b15	9.618	571.736	92.455	2564.548	15.551
Ctrl MO CO	Clone- Clone	h5b15	9.618	439.341	85.252	2553.701	15.551
Ctrl MO CO	Clone- Clone	h5b15	9.618	321.157	18.255	1616.356	15.551
Ctrl MO CO	Clone- Clone	h6b1	9.348	483.73	32.408	1830.824	15.112
Ctrl MO CO	Clone- Clone	h6b1	9.348	551.526	54.22	2274.644	15.112
Ctrl MO CO	Clone- Clone	h6b1	9.348	617.134	86.208	2326.672	15.112
Ctrl MO CO	Clone- Clone	h6b1	9.348	600.277	158.394	1946.174	15.112
Ctrl MO CO	Clone- Clone	h6b1	9.348	435.962	71.884	1597.461	15.112
Ctrl MO CO	Clone- Clone
Ctrl MO CO	Clone- Clone	h6b2	9.996	440.874	89.265	2135.701	16.166
Ctrl MO CO	Clone- Clone	h6b2	9.996	547.057	99.764	2554.799	16.166
Ctrl MO CO	Clone- Clone	h6b2	9.996	700.461	138.451	2375.599	16.166
Ctrl MO CO	Clone- Clone	h6b2	9.996	772.262	91.29	3582.299	16.166
Ctrl MO CO	Clone- Clone	h6b2	9.996	590.674	84.029	2197.732	16.166
Ctrl MO CO	Clone- Clone	h6b2	9.996	442.126	28.216	3052.466	16.166
Ctrl MO CO	Clone- Clone
Ctrl MO CO	Clone- Clone	h6b3	12.698	375.188	49.324	1616.894	20.559
Ctrl MO CO	Clone- Clone	h6b3	12.698	422.129	45.821	1754.18	20.559
Ctrl MO CO	Clone- Clone	h6b3	12.698	484.026	50.922	1941.973	20.559
Ctrl MO CO	Clone- Clone	h6b3	12.698	543.699	63.391	1980.481	20.559
Ctrl MO CO	Clone- Clone	h6b3	12.698	541.725	57.657	2419.332	20.559
Ctrl MO CO	Clone- Clone	h6b3	12.698	470.068	21.296	2377.919	20.559
Ctrl MO CO	Clone- Clone	h6b3	12.698	380.205	28.203	2412.189	20.559
Ctrl MO CO	Clone- Clone
Ctrl MO CO	Clone- Clone	h6b4	6.484	345.205	38.969	1177.996	10.455
Ctrl MO CO	Clone- Clone	h6b4	6.484	451.416	43.867	1675.537	10.455
Ctrl MO CO	Clone- Clone	h6b4	6.484	586.459	74.35	2050.826	10.455
Ctrl MO CO	Clone- Clone	h6b4	6.484	677.115	77.865	2055.215	10.455
Ctrl MO CO	Clone- Clone	h6b4	6.484	617.879	47.054	2522.656	10.455
Ctrl MO CO	Clone- Clone
Ctrl MO CO	Clone- Clone	h6b5	7.241	467.444	69.599	2304.491	11.685
Ctrl MO CO	Clone- Clone	h6b5	7.241	568.76	90.028	2299.308	11.685
Ctrl MO CO	Clone- Clone	h6b5	7.241	633.641	125.579	2083.293	11.685
Ctrl MO CO	Clone- Clone	h6b5	7.241	606.874	102.23	2378.594	11.685
Ctrl MO CO	Clone- Clone	h6b5	7.241	516.357	62.294	1689.979	11.685
Ctrl MO CO	Clone- Clone	h6b5	7.241	385.563	49.529	1493.988	11.685
Ctrl MO CO	Clone- Clone
Ctrl MO CO	Clone- Clone	h6b6	7.187	277.059	61.609	949.447	11.597
Ctrl MO CO	Clone- Clone	h6b6	7.187	463.952	80.246	1432.073	11.597
Ctrl MO CO	Clone- Clone	h6b6	7.187	504.556	68.85	1457.756	11.597
Ctrl MO CO	Clone- Clone	h6b6	7.187	519.486	107.892	2297.887	11.597
Ctrl MO CO	Clone- Clone	h6b6	7.187	478.284	116.566	1739.635	11.597
Ctrl MO CO	Clone- Clone	h6b6	7.187	370.91	52.162	2228.992	11.597
Ctrl MO CO	Clone- Clone
Ctrl MO CO	Clone- Clone	h6b7	8.267	220.047	19.851	871.199	13.354
Ctrl MO CO	Clone- Clone	h6b7	8.267	337.868	36.16	1416.664	13.354
Ctrl MO CO	Clone- Clone	h6b7	8.267	373.209	81.2	1334.859	13.354
Ctrl MO CO	Clone- Clone	h6b7	8.267	383.874	37.646	1666.287	13.354
Ctrl MO CO	Clone- Clone	h6b7	8.267	363.635	41.307	2011.59	13.354
Ctrl MO CO	Clone- Clone
Ctrl MO CO	Clone- Clone	h6b8	7.727	169.252	7.676	455.185	12.476
Ctrl MO CO	Clone- Clone	h6b8	7.727	372.559	42.487	1342.675	12.476
Ctrl MO CO	Clone- Clone	h6b8	7.727	584.032	122.435	1671.553	12.476
Ctrl MO CO	Clone- Clone	h6b8	7.727	632.165	163.128	2311.339	12.476
Ctrl MO CO	Clone- Clone	h6b8	7.727	513.401	109.118	1826.028	12.476
Ctrl MO CO	Clone- Clone
Ctrl MO CO	Clone- Clone	h6b9	7.889	618.82	89.062	3424.323	12.7
Ctrl MO CO	Clone- Clone	h6b9	7.889	587.497	80.014	2472.789	12.7
Ctrl MO CO	Clone- Clone	h6b9	7.889	479.929	43.845	1336.351	12.7
Ctrl MO CO	Clone- Clone
Ctrl MO CO	Clone- Clone	h6b10	4.755	442.565	85.538	1246.463	7.644
Ctrl MO CO	Clone- Clone	h6b10	4.755	592.904	88.405	2117.962	7.644
Ctrl MO CO	Clone- Clone	h6b10	4.755	566.673	78.699	2093.268	7.644
Ctrl MO CO	Clone- Clone	h6b10	4.755	395.851	52.77	1930.316	7.644
Ctrl MO CO	Clone- Clone
Ctrl MO CO	Clone- Clone	h6b11	10.05	342.223	27.012	1326.956	16.254
Ctrl MO CO	Clone- Clone	h6b11	10.05	548.588	109.295	1964.472	16.254
Ctrl MO CO	Clone- Clone	h6b11	10.05	613.19	129.922	1754.652	16.254
Ctrl MO CO	Clone- Clone	h6b11	10.05	638.249	124.102	2906.724	16.254
Ctrl MO CO	Clone- Clone	h6b11	10.05	515.423	75.517	2715.968	16.254
Ctrl MO CO	Clone- Clone
Ctrl MO CO	Clone- Clone	h6b12	9.618	217.094	25.751	816.104	15.551
Ctrl MO CO	Clone- Clone	h6b12	9.618	337.993	44.255	1393.553	15.551
Ctrl MO CO	Clone- Clone	h6b12	9.618	392.836	47.963	1395.743	15.551
Ctrl MO CO	Clone- Clone	h6b12	9.618	428.818	50.688	1419.519	15.551
Ctrl MO CO	Clone- Clone	h6b12	9.618	410.518	45.325	1609.385	15.551
Ctrl MO CO	Clone- Clone
Ctrl MO CO	Clone- Clone	h6b13	7.997	400.579	61.659	1531.299	12.915
Ctrl MO CO	Clone- Clone	h6b13	7.997	451.338	57.348	1969.042	12.915
Ctrl MO CO	Clone- Clone	h6b13	7.997	496.578	52.087	1814.358	12.915
Ctrl MO CO	Clone- Clone	h6b13	7.997	514.443	94.753	4070.368	12.915
Ctrl MO CO	Clone- Clone
Ctrl MO CO	Clone- Clone	h6b14	10.266	284.686	18.363	1014.02	16.605
Ctrl MO CO	Clone- Clone	h6b14	10.266	366.041	37.27	1270.988	16.605
Ctrl MO CO	Clone- Clone	h6b14	10.266	460.492	63.099	1701.037	16.605
Ctrl MO CO	Clone- Clone	h6b14	10.266	503.306	70.748	2314.044	16.605
Ctrl MO CO	Clone- Clone	h6b14	10.266	390.082	86.312	1806.727	16.605
Ctrl MO CO	Clone- Clone
Ctrl MO CO	Clone- Clone	h6b15	7.403	279.983	30.385	1005.309	11.949
Ctrl MO CO	Clone- Clone	h6b15	7.403	361.338	22.972	1293.411	11.949
Ctrl MO CO	Clone- Clone	h6b15	7.403	423.587	36.414	1540.533	11.949
Ctrl MO CO	Clone- Clone	h6b15	7.403	474.685	64.059	2323.021	11.949
Ctrl MO CO	Clone- Clone	h6b15	7.403	444.278	58.037	2199.866	11.949
Ctrl MO CO	Clone- Clone	h6b15	7.403	438.379	55.088	1771.215	11.949
Ctrl MO CO	Clone- Clone
Ctrl MO CO	Clone- Clone	h6b16	8.916	345.082	29.834	1117.065	14.409
Ctrl MO CO	Clone- Clone	h6b16	8.916	402.506	49.133	1498.511	14.409
Ctrl MO CO	Clone- Clone	h6b16	8.916	382.804	42.912	1833.302	14.409
Ctrl MO CO	Clone- Clone	h6b16	8.916	343.323	29.401	1539.578	14.409
Ctrl MO CO	Clone- Clone	h6b16	8.916	332.594	32.388	1566.889	14.409
Ctrl MO CO	Clone- Clone	h6b16	8.916	284.124	21.428	1524.531	14.409
Ctrl MO CO	Clone- Clone
Ctrl MO CO	Clone- Clone	h6b17	10.429	244.679	16.976	1001.142	16.868
Ctrl MO CO	Clone- Clone	h6b17	10.429	314.802	25.252	1299.543	16.868
Ctrl MO CO	Clone- Clone	h6b17	10.429	366.842	33.709	1934.853	16.868
Ctrl MO CO	Clone- Clone	h6b17	10.429	362.131	32.446	1928.193	16.868
Ctrl MO CO	Clone- Clone	h6b17	10.429	317.257	34.21	1093.671	16.868
Ctrl MO CO	Clone- Clone	h6b17	10.429	315.159	31.182	1371.919	16.868
Ctrl MO CO	Clone- Clone	h6b17	10.429	308.022	28.931	2511.816	16.868
Ctrl MO CO	Clone- Clone	h7b1	7.781	209.536	5.416	837.117	12.564
Ctrl MO CO	Clone- Clone	h7b1	7.781	395.896	25.059	3255.175	12.564
Ctrl MO CO	Clone- Clone	h7b1	7.781	442.916	35.43	2802.152	12.564
Ctrl MO CO	Clone- Clone	h7b1	7.781	423.187	25.911	2087.542	12.564
Ctrl MO CO	Clone- Clone	h7b1	7.781	442.244	48.952	2815.864	12.564
Ctrl MO CO	Clone- Clone
Ctrl MO CO	Clone- Clone	h7b2	4.539	223.1	23.08	777.286	7.292
Ctrl MO CO	Clone- Clone	h7b2	4.539	329.781	31.673	1483.786	7.292
Ctrl MO CO	Clone- Clone	h7b2	4.539	336.75	35.784	1223.724	7.292
Ctrl MO CO	Clone- Clone	h7b2	4.539	407.847	69.335	1319.907	7.292
Ctrl MO CO	Clone- Clone	h7b2	4.539	375.643	63.699	1812.547	7.292
Ctrl MO PO	Non Clone- Clone	h2b1	13.725	149.959	6.676	615.712	22.228
Ctrl MO PO	Non Clone- Clone	h2b1	13.725	240.701	8.705	815.929	22.228
Ctrl MO PO	Non Clone- Clone	h2b1	13.725	296.645	28.411	1524.571	22.228
Ctrl MO PO	Non Clone- Clone	h2b1	13.725	315.565	31.591	1661.463	22.228
Ctrl MO PO	Non Clone- Clone	h2b1	13.725	319.199	34.627	1943.05	22.228
Ctrl MO PO	Non Clone- Clone	h2b1	13.725	318.819	23.464	1333.216	22.228
Ctrl MO PO	Non Clone- Clone	h2b1	13.725	324.912	57.888	1639.537	22.228
Ctrl MO PO	Non Clone- Clone
Ctrl MO PO	Non Clone- Clone	h2b2	9.996	284.574	52.251	756.112	16.166
Ctrl MO PO	Non Clone- Clone	h2b2	9.996	441.34	66.767	1465.135	16.166
Ctrl MO PO	Non Clone- Clone	h2b2	9.996	548.072	90.11	2187.798	16.166
Ctrl MO PO	Non Clone- Clone	h2b2	9.996	597.054	81.472	2160.812	16.166
Ctrl MO PO	Non Clone- Clone	h2b2	9.996	595.038	110.049	2060.643	16.166
Ctrl MO PO	Non Clone- Clone	h2b2	9.996	565.156	81.919	1750.942	16.166
Ctrl MO PO	Non Clone- Clone	h2b2	9.996	417.272	63.68	1218.753	16.166
Ctrl MO PO	Non Clone- Clone	h3b1	6.7	361.254	43.189	921.759	10.807
Ctrl MO PO	Non Clone- Clone	h3b1	6.7	236.472	26.557	644.097	10.807
Ctrl MO PO	Non Clone- Clone	h3b1	6.7	174.445	12.079	521.328	10.807
Ctrl MO PO	Non Clone- Clone	h3b1	6.7	96.469	4.25	495.216	10.807
Ctrl MO PO	Non Clone- Clone	h3b1	6.7	56.831	0	251.625	10.807
Ctrl MO PO	Non Clone- Clone	h4b1	12.428	450.729	57.174	2449.295	20.114
Ctrl MO PO	Non Clone- Clone	h4b1	12.428	514.153	29.122	2417.981	20.114
Ctrl MO PO	Non Clone- Clone	h4b1	12.428	460.095	38.59	1344.783	20.114
Ctrl MO PO	Non Clone- Clone	h4b1	12.428	280.088	36.413	2630.739	20.114
Ctrl MO PO	Non Clone- Clone
Ctrl MO PO	Non Clone- Clone	h4b2	11.833	169.581	11.191	731.291	19.153
Ctrl MO PO	Non Clone- Clone	h4b2	11.833	322.656	43.207	1751.045	19.153
Ctrl MO PO	Non Clone- Clone	h4b2	11.833	425.645	31.036	3205.391	19.153
Ctrl MO PO	Non Clone- Clone	h4b2	11.833	459.668	71.754	2495.062	19.153
Ctrl MO PO	Non Clone- Clone	h4b2	11.833	414.46	50.711	1603.911	19.153
Ctrl MO PO	Non Clone- Clone	h4b2	11.833	288.323	8.618	2476.721	19.153
Ctrl MO PO	Non Clone- Clone	h4b2	11.833	200.292	2.287	1744.882	19.153
Ctrl MO PO	Non Clone- Clone	h5b1	9.564	252.177	12.657	740.514	15.463
Ctrl MO PO	Non Clone- Clone	h5b1	9.564	353.141	11.733	1117.477	15.463
Ctrl MO PO	Non Clone- Clone	h5b1	9.564	476.1	33.264	1599.64	15.463
Ctrl MO PO	Non Clone- Clone	h5b1	9.564	844.448	119.473	2289.93	15.463
Ctrl MO PO	Non Clone- Clone	h5b1	9.564	895.814	140.668	2796.799	15.463
Ctrl MO PO	Non Clone- Clone	h5b1	9.564	753.628	150.97	2636.421	15.463
Ctrl MO PO	Non Clone- Clone	h5b1	9.564	538.867	95.57	2245.675	15.463
Ctrl MO PO	Non Clone- Clone
Ctrl MO PO	Non Clone- Clone	h5b2	11.023	244.242	22.176	699.962	17.835
Ctrl MO PO	Non Clone- Clone	h5b2	11.023	363.932	36.475	1275.733	17.835
Ctrl MO PO	Non Clone- Clone	h5b2	11.023	493.725	48.677	2439.358	17.835
Ctrl MO PO	Non Clone- Clone	h5b2	11.023	596.975	11.228	2617.617	17.835
Ctrl MO PO	Non Clone- Clone	h5b2	11.023	456.036	42.225	4057.235	17.835
Ctrl MO PO	Non Clone- Clone	h5b2	10.645	603.343	152.646	2218.26	17.22
Ctrl MO PO	Non Clone- Clone	h5b2	10.645	537.202	151.496	1740.099	17.22
Ctrl MO PO	Non Clone- Clone	h5b2	10.645	510.926	144.23	1801.308	17.22
Ctrl MO PO	Non Clone- Clone	h5b2	10.645	500.119	65.256	1692.747	17.22
Ctrl MO PO	Non Clone- Clone	h6b1	11.942	168.908	8.93	767.15	19.329
Ctrl MO PO	Non Clone- Clone	h6b1	11.942	253.321	15.313	1504.358	19.329
Ctrl MO PO	Non Clone- Clone	h6b1	11.942	337.068	26.62	2061.064	19.329
Ctrl MO PO	Non Clone- Clone	h6b1	11.942	399.248	26.83	2005.391	19.329
Ctrl MO PO	Non Clone- Clone	h6b1	11.942	352.707	37.985	1860.792	19.329
Ctrl MO PO	Non Clone- Clone	h6b1	11.942	345.629	41.124	1756.063	19.329
Ctrl MO PO	Non Clone- Clone	h6b1	11.942	335.479	51.377	2525.36	19.329
Ctrl MO PO	Non Clone- Clone
Ctrl MO PO	Non Clone- Clone	h6b2	9.456	372.847	54.086	1295.751	15.287
Ctrl MO PO	Non Clone- Clone	h6b2	9.456	485.937	53.625	2219.232	15.287
Ctrl MO PO	Non Clone- Clone	h6b2	9.456	561.557	55.524	2200.451	15.287
Ctrl MO PO	Non Clone- Clone	h6b2	9.456	541.841	66.092	2298.091	15.287
Ctrl MO PO	Non Clone- Clone	h6b2	9.456	473.768	95.054	2635.583	15.287
Ctrl MO PO	Non Clone- Clone	h6b2	9.456	405.991	81.264	2847.156	15.287
Ctrl MO PO	Non Clone- Clone	h6b2	9.456	283.133	44.707	1273.225	15.287
Ctrl MO PO	Non Clone- Clone	h7b1	4.539	223.1	23.08	777.286	7.292
Ctrl MO PO	Non Clone- Clone	h7b1	4.539	329.781	31.673	1483.786	7.292
Ctrl MO PO	Non Clone- Clone	h7b1	4.539	336.75	35.784	1223.724	7.292
Ctrl MO PO	Non Clone- Clone	h7b1	4.539	407.847	69.335	1319.907	7.292
Ctrl MO PO	Non Clone- Clone	h7b1	4.539	375.643	63.699	1812.547	7.292
Ctrl MO NO	Non Clone- Non Clone	h2b1	6.052	174.42	5.537	708.165	9.752
Ctrl MO NO	Non Clone- Non Clone	h2b1	6.052	242.177	14.486	840.281	9.752
Ctrl MO NO	Non Clone- Non Clone	h2b1	6.052	361.959	32.521	1398.993	9.752
Ctrl MO NO	Non Clone- Non Clone	h2b1	6.052	487.218	35.926	2230.88	9.752
Ctrl MO NO	Non Clone- Non Clone	h2b1	6.052	520.015	75.352	2648.536	9.752
Ctrl MO NO	Non Clone- Non Clone	h2b1	6.052	477.678	50.938	2351.795	9.752
Ctrl MO NO	Non Clone- Non Clone	h2b1	6.052	440.683	27.9	1402.21	9.752
Ctrl MO NO	Non Clone- Non Clone	h2b1	6.052	430.075	10.62	1803.812	9.752
Ctrl MO NO	Non Clone- Non Clone
Ctrl MO NO	Non Clone- Non Clone	h2b2	4.485	258.698	11.006	1074.426	7.204
Ctrl MO NO	Non Clone- Non Clone	h2b2	4.485	355.311	27.909	1323.376	7.204
Ctrl MO NO	Non Clone- Non Clone	h2b2	4.485	414.402	32.316	1254.334	7.204
Ctrl MO NO	Non Clone- Non Clone	h2b2	4.485	422.563	113.988	1321.487	7.204
Ctrl MO NO	Non Clone- Non Clone	h2b2	4.485	422.002	113.34	1440.405	7.204
Ctrl MO NO	Non Clone- Non Clone	h2b2	4.485	439.006	80.318	2306.944	7.204
Ctrl MO NO	Non Clone- Non Clone
Ctrl MO NO	Non Clone- Non Clone	h2b3	8.591	272.776	16.235	945.766	13.882
Ctrl MO NO	Non Clone- Non Clone	h2b3	8.591	301.679	19.366	1379.954	13.882
Ctrl MO NO	Non Clone- Non Clone	h2b3	8.591	292.088	32.311	2394.08	13.882
Ctrl MO NO	Non Clone- Non Clone	h2b3	8.591	315.962	41.51	2394.061	13.882
Ctrl MO NO	Non Clone- Non Clone	h2b3	7.457	596.952	107.392	2005.774	12.037
Ctrl MO NO	Non Clone- Non Clone	h2b3	7.457	593.406	139.764	1973.807	12.037
Ctrl MO NO	Non Clone- Non Clone	h2b3	7.457	535.147	62.346	2356.395	12.037
Ctrl MO NO	Non Clone- Non Clone	h2b3	7.457	426.14	57.621	2603.22	12.037
Ctrl MO NO	Non Clone- Non Clone
Ctrl MO NO	Non Clone- Non Clone	h2b4	5.566	313.745	15.368	1177.739	8.962
Ctrl MO NO	Non Clone- Non Clone	h2b4	5.566	345.63	20.29	1273.876	8.962
Ctrl MO NO	Non Clone- Non Clone	h2b4	5.566	368.549	26.72	1566.327	8.962
Ctrl MO NO	Non Clone- Non Clone	h2b4	5.728	498.324	94.365	1784.275	9.225
Ctrl MO NO	Non Clone- Non Clone	h2b4	5.728	497.023	129.033	1437.357	9.225
Ctrl MO NO	Non Clone- Non Clone	h2b4	5.728	476.943	99.397	1821.468	9.225
Ctrl MO NO	Non Clone- Non Clone	h2b4	5.728	461.752	114.16	1756.074	9.225
Ctrl MO NO	Non Clone- Non Clone	h2b4	5.728	460.794	123.638	1318.154	9.225
Ctrl MO NO	Non Clone- Non Clone	h2b4	5.728	428.222	48.632	2220.771	9.225
Ctrl MO NO	Non Clone- Non Clone
Ctrl MO NO	Non Clone- Non Clone	h2b5	8.375	309.786	33.167	863.099	13.53
Ctrl MO NO	Non Clone- Non Clone	h2b5	8.375	372.74	64.062	1161.288	13.53
Ctrl MO NO	Non Clone- Non Clone	h2b5	8.375	459.108	73.062	2146.834	13.53
Ctrl MO NO	Non Clone- Non Clone	h2b5	8.375	541.147	67.138	2338.822	13.53
Ctrl MO NO	Non Clone- Non Clone	h2b5	8.375	524.483	90.44	2439.478	13.53
Ctrl MO NO	Non Clone- Non Clone	h2b5	8.375	490.282	98.952	2337.801	13.53
Ctrl MO NO	Non Clone- Non Clone	h2b5	8.375	463.981	120.599	1997.522	13.53
Ctrl MO NO	Non Clone- Non Clone
Ctrl MO NO	Non Clone- Non Clone	h2b6	6.214	229.597	20.134	1010.63	10.008
Ctrl MO NO	Non Clone- Non Clone	h2b6	6.214	307.753	25.558	1659.767	10.008
Ctrl MO NO	Non Clone- Non Clone	h2b6	6.214	319.928	20.155	1938.867	10.008
Ctrl MO NO	Non Clone- Non Clone	h2b6	6.106	375.058	39.71	1857.078	9.833
Ctrl MO NO	Non Clone- Non Clone	h2b6	6.106	332.895	60.04	1336.176	9.833
Ctrl MO NO	Non Clone- Non Clone	h2b6	6.106	309.548	53.734	1409.328	9.833
Ctrl MO NO	Non Clone- Non Clone	h2b6	6.7	635.239	78.904	2274.556	10.804
Ctrl MO NO	Non Clone- Non Clone	h2b6	6.7	562.785	84.929	2020.962	10.804
Ctrl MO NO	Non Clone- Non Clone	h2b6	6.7	480.888	99.962	1620	10.804
Ctrl MO NO	Non Clone- Non Clone	h2b6	6.7	422.996	101.938	1342.229	10.804
Ctrl MO NO	Non Clone- Non Clone	h2b6	6.7	359.914	50.463	1345.525	10.804
Ctrl MO NO	Non Clone- Non Clone	h3b1	5.241	182.808	11.396	660.588	8.434
Ctrl MO NO	Non Clone- Non Clone	h3b1	5.241	240.203	6.86	1163.124	8.434
Ctrl MO NO	Non Clone- Non Clone	h3b1	5.241	261.452	16.958	1243.217	8.434
Ctrl MO NO	Non Clone- Non Clone	h3b1	5.241	314.16	28.021	968.855	8.434
Ctrl MO NO	Non Clone- Non Clone	h3b1	5.241	383.073	2.236	1011.167	8.434
Ctrl MO NO	Non Clone- Non Clone
Ctrl MO NO	Non Clone- Non Clone	h3b2	9.456	106.765	1.711	651.249	15.287
Ctrl MO NO	Non Clone- Non Clone	h3b2	9.456	229.135	15.116	1332.321	15.287
Ctrl MO NO	Non Clone- Non Clone	h3b2	9.456	362.254	16.095	1472.281	15.287
Ctrl MO NO	Non Clone- Non Clone	h3b2	9.456	398.86	38.659	1363.779	15.287
Ctrl MO NO	Non Clone- Non Clone	h3b2	9.456	406.262	60.051	1461.407	15.287
Ctrl MO NO	Non Clone- Non Clone	h3b2	9.456	324.786	34.146	1451.845	15.287
Ctrl MO NO	Non Clone- Non Clone
Ctrl MO NO	Non Clone- Non Clone	h3b3	9.348	92.477	1.381	434.079	15.112
Ctrl MO NO	Non Clone- Non Clone	h3b3	9.348	212.607	4.707	1107.61	15.112
Ctrl MO NO	Non Clone- Non Clone	h3b3	9.348	305.624	20.308	1742.83	15.112
Ctrl MO NO	Non Clone- Non Clone	h3b3	9.348	316.857	11.867	1358.95	15.112
Ctrl MO NO	Non Clone- Non Clone	h3b3	9.348	315.327	26.081	1019.379	15.112
Ctrl MO NO	Non Clone- Non Clone	h3b3	9.348	256.04	10.596	1088.867	15.112
Ctrl MO NO	Non Clone- Non Clone	h3b4	9.456	106.765	1.711	651.249	15.287
Ctrl MO NO	Non Clone- Non Clone	h3b4	9.456	229.135	15.116	1332.321	15.287
Ctrl MO NO	Non Clone- Non Clone	h3b4	9.456	362.254	16.095	1472.281	15.287
Ctrl MO NO	Non Clone- Non Clone	h3b4	9.456	398.86	38.659	1363.779	15.287
Ctrl MO NO	Non Clone- Non Clone	h3b4	9.456	406.262	60.051	1461.407	15.287
Ctrl MO NO	Non Clone- Non Clone	h3b4	9.456	324.786	34.146	1451.845	15.287
Ctrl MO NO	Non Clone- Non Clone
Ctrl MO NO	Non Clone- Non Clone	h3b5	9.456	106.765	1.711	651.249	15.287
Ctrl MO NO	Non Clone- Non Clone	h3b5	9.456	229.135	15.116	1332.321	15.287
Ctrl MO NO	Non Clone- Non Clone	h3b5	9.456	362.254	16.095	1472.281	15.287
Ctrl MO NO	Non Clone- Non Clone	h3b5	9.456	398.86	38.659	1363.779	15.287
Ctrl MO NO	Non Clone- Non Clone	h3b5	9.456	406.262	60.051	1461.407	15.287
Ctrl MO NO	Non Clone- Non Clone	h3b5	9.456	324.786	34.146	1451.845	15.287
Ctrl MO NO	Non Clone- Non Clone	h4b1	11.131	149.517	4.775	649.961	18.011
Ctrl MO NO	Non Clone- Non Clone	h4b1	11.131	269.739	27.03	884.13	18.011
Ctrl MO NO	Non Clone- Non Clone	h4b1	11.131	340.487	54.46	1005.182	18.011
Ctrl MO NO	Non Clone- Non Clone	h4b1	11.131	380.936	75.473	1190.017	18.011
Ctrl MO NO	Non Clone- Non Clone	h4b1	11.131	511.05	90.733	1906.284	18.011
Ctrl MO NO	Non Clone- Non Clone	h4b1	11.131	556.944	78.698	3885.158	18.011
Ctrl MO NO	Non Clone- Non Clone	h4b1	11.131	334.021	32.819	2257.235	18.011
Ctrl MO NO	Non Clone- Non Clone	h4b1	11.131	230.653	17.123	1842.089	18.011
Ctrl MO NO	Non Clone- Non Clone
Ctrl MO NO	Non Clone- Non Clone	h4b2	13.563	129.813	0	560.306	21.965
Ctrl MO NO	Non Clone- Non Clone	h4b2	13.563	180.12	0.507	669.109	21.965
Ctrl MO NO	Non Clone- Non Clone	h4b2	13.563	197.23	0.653	1081.871	21.965
Ctrl MO NO	Non Clone- Non Clone	h4b2	13.563	206.173	1.929	1144.776	21.965
Ctrl MO NO	Non Clone- Non Clone	h4b2	13.887	330.393	12.218	1556.947	22.492
Ctrl MO NO	Non Clone- Non Clone	h4b2	13.887	410.703	47.143	3979.226	22.492
Ctrl MO NO	Non Clone- Non Clone	h4b2	13.887	447.443	58.607	4094.972	22.492
Ctrl MO NO	Non Clone- Non Clone	h4b2	13.887	400.146	49.299	3380.025	22.492
Ctrl MO NO	Non Clone- Non Clone	h5b1	10.969	330.476	15.579	1020.034	17.747
Ctrl MO NO	Non Clone- Non Clone	h5b1	10.969	432.82	48.293	2100.485	17.747
Ctrl MO NO	Non Clone- Non Clone	h5b1	10.969	496.766	30.344	2626.249	17.747
Ctrl MO NO	Non Clone- Non Clone	h5b1	10.969	501.341	47.015	1928.228	17.747
Ctrl MO NO	Non Clone- Non Clone	h5b1	10.969	488.942	86.043	2264.577	17.747
Ctrl MO NO	Non Clone- Non Clone	h5b1	10.969	437.448	52.963	2221.319	17.747
Ctrl MO NO	Non Clone- Non Clone	h5b1	10.969	368.293	45.959	2125.289	17.747
Ctrl MO NO	Non Clone- Non Clone	h6b1	8.645	297.955	14.079	934.304	13.969
Ctrl MO NO	Non Clone- Non Clone	h6b1	8.645	407.397	46.733	1350.792	13.969
Ctrl MO NO	Non Clone- Non Clone	h6b1	8.645	541.352	57.001	1566.016	13.969
Ctrl MO NO	Non Clone- Non Clone	h6b1	8.645	512.944	81.309	1647.559	13.969
Ctrl MO NO	Non Clone- Non Clone	h6b1	8.645	385.699	34.719	1122.601	13.969
Ctrl MO NO	Non Clone- Non Clone
Ctrl MO NO	Non Clone- Non Clone	h6b2	9.996	324.175	28.243	1140.97	16.166
Ctrl MO NO	Non Clone- Non Clone	h6b2	9.996	379.268	38.626	1930.119	16.166
Ctrl MO NO	Non Clone- Non Clone	h6b2	9.996	390.711	34.564	1593.243	16.166
Ctrl MO NO	Non Clone- Non Clone	h6b2	9.996	379.078	43.382	1883.823	16.166
Ctrl MO NO	Non Clone- Non Clone	h6b2	9.996	370.898	34.944	2363.252	16.166
Ctrl MO NO	Non Clone- Non Clone	h6b2	9.996	373.241	37.394	1653.382	16.166
Ctrl MO NO	Non Clone- Non Clone
Ctrl MO NO	Non Clone- Non Clone	h6b3	5.836	304.915	18.764	747.061	9.401
Ctrl MO NO	Non Clone- Non Clone	h6b3	5.836	362.623	68.526	1172.605	9.401
Ctrl MO NO	Non Clone- Non Clone	h6b3	5.836	405.255	69.297	1564.017	9.401
Ctrl MO NO	Non Clone- Non Clone	h6b3	5.836	415.374	52.313	1098.934	9.401
Ctrl MO NO	Non Clone- Non Clone	h6b3	5.836	405.223	36.597	1251.189	9.401
Ctrl MO NO	Non Clone- Non Clone
Ctrl MO NO	Non Clone- Non Clone	h6b4	8.429	336.377	41.91	1134.011	13.618
Ctrl MO NO	Non Clone- Non Clone	h6b4	8.429	402.598	45.56	1392.799	13.618
Ctrl MO NO	Non Clone- Non Clone	h6b4	8.429	523.159	38.201	2405.302	13.618
Ctrl MO NO	Non Clone- Non Clone	h6b4	8.429	638.308	40.539	3097.97	13.618
Ctrl MO NO	Non Clone- Non Clone	h6b4	8.429	664.886	43.008	2021.859	13.618
Ctrl MO NO	Non Clone- Non Clone	h6b4	8.429	563.692	81.635	1459.806	13.618
Ctrl MO NO	Non Clone- Non Clone
Ctrl MO NO	Non Clone- Non Clone	h6b5	9.51	384.484	27.697	1157.891	15.375
Ctrl MO NO	Non Clone- Non Clone	h6b5	9.51	524.106	39.082	2198.304	15.375
Ctrl MO NO	Non Clone- Non Clone	h6b5	9.51	642.909	91.084	2748.461	15.375
Ctrl MO NO	Non Clone- Non Clone	h6b5	9.51	653.76	95.884	2635.806	15.375
Ctrl MO NO	Non Clone- Non Clone	h6b5	9.51	534.952	131.769	2662.154	15.375
Ctrl MO NO	Non Clone- Non Clone	h6b5	9.51	418.463	75.984	2915.989	15.375
Ctrl MO NO	Non Clone- Non Clone
Ctrl MO NO	Non Clone- Non Clone	h6b6	7.673	276.542	26.32	1069.477	12.388
Ctrl MO NO	Non Clone- Non Clone	h6b6	7.673	320.879	34.685	1475.991	12.388
Ctrl MO NO	Non Clone- Non Clone	h6b6	7.673	303.125	29.19	1697.806	12.388
Ctrl MO NO	Non Clone- Non Clone	h6b6	7.673	298.436	55.551	1237.847	12.388
Ctrl MO NO	Non Clone- Non Clone	h6b6	8.321	468.647	41.099	1748.174	13.442
Ctrl MO NO	Non Clone- Non Clone	h6b6	8.321	400.815	44.55	1684.826	13.442
Ctrl MO NO	Non Clone- Non Clone
Ctrl MO NO	Non Clone- Non Clone	h6b7	14.427	195.517	18.224	827.395	23.37
Ctrl MO NO	Non Clone- Non Clone	h6b7	14.427	296.689	28.544	1105.933	23.37
Ctrl MO NO	Non Clone- Non Clone	h6b7	14.427	440.627	36.763	1686.062	23.37
Ctrl MO NO	Non Clone- Non Clone	h6b7	14.427	570.824	51.06	2330.306	23.37
Ctrl MO NO	Non Clone- Non Clone	h6b7	14.427	643.202	51.893	3074.873	23.37
Ctrl MO NO	Non Clone- Non Clone	h6b7	14.427	605.941	35.954	3528.545	23.37
Ctrl MO NO	Non Clone- Non Clone	h6b7	14.427	493.881	56.071	4092.974	23.37
Ctrl MO NO	Non Clone- Non Clone	h7b1	12.644	342.257	20.231	1369.385	20.471
Ctrl MO NO	Non Clone- Non Clone	h7b1	12.644	575.52	71.608	2241.037	20.471
Ctrl MO NO	Non Clone- Non Clone	h7b1	12.644	597.68	69.479	2124.373	20.471
Ctrl MO NO	Non Clone- Non Clone	h7b1	12.644	557.92	66.74	2114.698	20.471
Ctrl MO NO	Non Clone- Non Clone
Ctrl MO NO	Non Clone- Non Clone	h7b2	10.537	110.069	7.151	299.495	17.045
Ctrl MO NO	Non Clone- Non Clone	h7b2	10.537	318.849	29.101	1143.349	17.045
Ctrl MO NO	Non Clone- Non Clone	h7b2	10.537	649.227	108.321	2620.358	17.045
Ctrl MO NO	Non Clone- Non Clone	h7b2	10.537	690.417	110.25	2797.482	17.045
Ctrl MO NO	Non Clone- Non Clone	h7b2	10.537	677.257	126.982	3889.416	17.045
Ctrl MO NO	Non Clone- Non Clone	h7b2	10.537	532.89	42.206	3130.014	17.045
Ctrl MO NO	Non Clone- Non Clone
Ctrl MO NO	Non Clone- Non Clone	h7b3	3.188	291.134	50.048	1121.438	5.096
Ctrl MO NO	Non Clone- Non Clone	h7b3	3.188	563.977	157.037	2364.952	5.096
Ctrl MO NO	Non Clone- Non Clone	h7b3	3.188	527.231	90.869	2064.917	5.096
Ctrl MO NO	Non Clone- Non Clone	h7b3	3.188	642.487	121.118	1348.458	5.096
Ctrl MO NO	Non Clone- Non Clone	h7b3	3.188	601.644	47.573	1633.069	5.096
Ctrl MO NO	Non Clone- Non Clone
Ctrl MO NO	Non Clone- Non Clone	h7b4	12.212	302.245	48.732	1196.682	19.768
Ctrl MO NO	Non Clone- Non Clone	h7b4	12.212	501.445	96.605	2068.549	19.768
Ctrl MO NO	Non Clone- Non Clone	h7b4	12.212	584.106	94.134	2075.495	19.768
Ctrl MO NO	Non Clone- Non Clone	h7b4	12.212	536.895	43.868	1882.825	19.768
Ctrl MO NO	Non Clone- Non Clone
Ctrl MO NO	Non Clone- Non Clone	h7b5	12.86	133.75	7.575	564.037	20.823
Ctrl MO NO	Non Clone- Non Clone	h7b5	12.86	299.7	42.811	1241.949	20.823
Ctrl MO NO	Non Clone- Non Clone	h7b5	12.86	380.667	16.794	1662.553	20.823
Ctrl MO NO	Non Clone- Non Clone	h7b5	12.86	504.958	68.651	2509.365	20.823
Ctrl MO NO	Non Clone- Non Clone	h7b5	12.86	621.815	69.383	3110.469	20.823
Ctrl MO NO	Non Clone- Non Clone	h7b5	12.86	502.508	54.757	2495.478	20.823
Ecad MO CO	Clone- Clone	h2b2	9.78	498.553	122.499	2748.66	15.815
Ecad MO CO	Clone- Clone	h2b2	9.78	585.267	72.41	1892.882	15.815
Ecad MO CO	Clone- Clone	h2b2	9.78	614.825	123.728	3217.767	15.815
Ecad MO CO	Clone- Clone	h2b2	9.78	590.014	98.897	2418.529	15.815
Ecad MO CO	Clone- Clone	h2b2	9.78	554.94	86.826	4033.131	15.815
Ecad MO CO	Clone- Clone	h2b2	9.78	470.553	60.709	4095	15.815
Ecad MO CO	Clone- Clone	h2b2	9.78	289.235	19.898	1274.596	15.815
Ecad MO CO	Clone- Clone
Ecad MO CO	Clone- Clone	h2b3	5.89	368.388	52.418	1242.835	9.489
Ecad MO CO	Clone- Clone	h2b3	5.89	349.993	24.607	1500.101	9.489
Ecad MO CO	Clone- Clone	h2b3	5.89	260.193	23.932	657.45	9.489
Ecad MO CO	Clone- Clone	h2b3	5.89	179.587	21.162	495.544	9.489
Ecad MO CO	Clone- Clone	h2b3	5.89	111.115	18.648	416.157	9.489
Ecad MO CO	Clone- Clone
Ecad MO CO	Clone- Clone	h2b4	8.862	268.845	48.822	911.4	14.321
Ecad MO CO	Clone- Clone	h2b4	8.862	326.454	68.057	1438.553	14.321
Ecad MO CO	Clone- Clone	h2b4	8.862	329.279	50.968	2063.591	14.321
Ecad MO CO	Clone- Clone	h2b4	7.619	343.943	67.724	1148.194	12.3
Ecad MO CO	Clone- Clone	h2b4	7.619	450.048	47.149	1695.99	12.3
Ecad MO CO	Clone- Clone	h2b4	7.619	477.132	60.439	3026.683	12.3
Ecad MO CO	Clone- Clone
Ecad MO CO	Clone- Clone	h2b5	7.727	222.92	19.33	721.489	12.476
Ecad MO CO	Clone- Clone	h2b5	7.727	208.94	24.041	824.468	12.476
Ecad MO CO	Clone- Clone	h2b5	7.727	223.845	21.781	1010.355	12.476
Ecad MO CO	Clone- Clone	h2b5	7.727	293.709	24.567	1314.53	12.476
Ecad MO CO	Clone- Clone	h2b5	7.727	256.429	42.487	1386.309	12.476
Ecad MO CO	Clone- Clone	h2b5	7.241	300.158	44.841	1662.454	11.685
Ecad MO CO	Clone- Clone	h2b5	7.241	280.766	52.952	1309.357	11.685
Ecad MO CO	Clone- Clone	h2b5	7.241	269.868	35.073	1067.142	11.685
Ecad MO CO	Clone- Clone
Ecad MO CO	Clone- Clone	h2b6	7.673	192.45	27.295	717.617	12.388
Ecad MO CO	Clone- Clone	h2b6	7.673	241.721	15.195	1177.389	12.388
Ecad MO CO	Clone- Clone	h2b6	7.673	233.175	27.357	1143.712	12.388
Ecad MO CO	Clone- Clone	h2b6	7.673	201.033	10.783	852.952	12.388
Ecad MO CO	Clone- Clone	h2b6	6.646	233.357	17.718	824.861	10.719
Ecad MO CO	Clone- Clone	h2b6	6.646	241.078	11.229	667.357	10.719
Ecad MO CO	Clone- Clone	h2b6	6.646	236.797	24.481	1817.436	10.719
Ecad MO CO	Clone- Clone
Ecad MO CO	Clone- Clone	h2b7	2.648	196.199	25.605	476.406	4.217
Ecad MO CO	Clone- Clone	h2b7	2.648	193.945	22.586	480.35	4.217
Ecad MO CO	Clone- Clone	h2b7	2.648	173.671	33.838	591.459	4.217
Ecad MO CO	Clone- Clone	h2b7	2.648	180.189	37.549	776.294	4.217
Ecad MO CO	Clone- Clone	h2b7	2.648	223.176	55.243	737.888	4.217
Ecad MO CO	Clone- Clone	h2b7	2.648	271.24	54.919	1601.731	4.217
Ecad MO CO	Clone- Clone	h3b1	11.725	364.476	72.919	1210.752	18.977
Ecad MO CO	Clone- Clone	h3b1	11.725	402.509	84.363	1086.278	18.977
Ecad MO CO	Clone- Clone	h3b1	11.725	444.299	84.043	1315.157	18.977
Ecad MO CO	Clone- Clone	h3b1	11.725	446.568	65.401	1150.556	18.977
Ecad MO CO	Clone- Clone	h3b1	11.725	398	79.956	1287.183	18.977
Ecad MO CO	Clone- Clone	h3b1	11.293	318.14	5.394	1321.398	18.275
Ecad MO CO	Clone- Clone	h3b1	11.293	270.15	34.446	846.145	18.275
Ecad MO CO	Clone- Clone
Ecad MO CO	Clone- Clone	h3b2	5.566	226.459	39.478	653.653	8.961
Ecad MO CO	Clone- Clone	h3b2	5.566	283.993	65.085	1094.646	8.961
Ecad MO CO	Clone- Clone	h3b2	5.566	293.377	79.351	1165.841	8.961
Ecad MO CO	Clone- Clone	h3b2	5.566	342.046	120.087	904.718	8.962
Ecad MO CO	Clone- Clone	h3b2	5.566	343.707	121.42	938.491	8.962
Ecad MO CO	Clone- Clone	h3b2	5.566	376.928	117.632	1181.897	8.962
Ecad MO CO	Clone- Clone	h3b2	5.566	387.856	61.165	1178.647	8.962
Ecad MO CO	Clone- Clone
Ecad MO CO	Clone- Clone	h3b3	10.321	293.516	39.057	1238.362	16.693
Ecad MO CO	Clone- Clone	h3b3	10.321	321.154	54.552	1369.958	16.693
Ecad MO CO	Clone- Clone	h3b3	10.321	327.168	28.395	1012.811	16.693
Ecad MO CO	Clone- Clone	h3b3	10.321	309.751	53.815	1465.152	16.693
Ecad MO CO	Clone- Clone	h3b3	10.321	305.606	42.962	2494.51	16.693
Ecad MO CO	Clone- Clone	h3b3	10.537	338.069	51.02	1977.985	17.045
Ecad MO CO	Clone- Clone	h3b3	10.537	338.069	51.02	1977.985	17.045
Ecad MO CO	Clone- Clone	h3b3	10.537	333.648	11.557	1599.35	17.045
Ecad MO CO	Clone- Clone	h3b3	10.537	277.439	35.981	1184.044	17.045
Ecad MO CO	Clone- Clone
Ecad MO CO	Clone- Clone	h3b4	9.078	319.706	46.758	947.678	14.672
Ecad MO CO	Clone- Clone	h3b4	9.078	368.346	60.078	1200.691	14.672
Ecad MO CO	Clone- Clone	h3b4	9.078	432.618	52.794	1534.529	14.672
Ecad MO CO	Clone- Clone	h3b4	9.078	505.978	60.365	1944.913	14.672
Ecad MO CO	Clone- Clone	h3b4	9.078	518.391	39.622	1534.239	14.672
Ecad MO CO	Clone- Clone	h3b4	9.078	493.92	97.173	2180.46	14.672
Ecad MO CO	Clone- Clone	h3b4	9.618	437.44	68.194	2822.372	15.533
Ecad MO CO	Clone- Clone	h3b4	9.618	335.826	52.465	1492.787	15.533
Ecad MO CO	Clone- Clone	h3b4	9.618	248.032	19.742	1113.441	15.533
Ecad MO CO	Clone- Clone	h4b1	9.888	362.012	66.346	911.082	15.99
Ecad MO CO	Clone- Clone	h4b1	9.888	458.017	66.75	1361.525	15.99
Ecad MO CO	Clone- Clone	h4b1	9.888	533.164	114.949	1493.55	15.99
Ecad MO CO	Clone- Clone	h4b1	9.888	610.544	95.079	1724.558	15.99
Ecad MO CO	Clone- Clone	h4b1	9.888	619.592	132.036	2079.659	15.99
Ecad MO CO	Clone- Clone	h4b1	9.888	541.414	93.145	1718.94	15.99
Ecad MO CO	Clone- Clone	h4b1	9.888	415.959	55.487	1761.912	15.99
Ecad MO CO	Clone- Clone	h4b1	9.888	297.513	48.52	1937.035	15.99
Ecad MO CO	Clone- Clone	h4b1	9.888	166.735	13.635	775.417	15.99
Ecad MO CO	Clone- Clone
Ecad MO CO	Clone- Clone	h4b2	2.81	268.297	50.263	531.884	4.481
Ecad MO CO	Clone- Clone	h4b2	2.81	328.227	50.39	715.428	4.481
Ecad MO CO	Clone- Clone	h4b2	2.81	340.93	14.483	1074.646	4.481
Ecad MO CO	Clone- Clone	h4b2	3.62	409.673	69.175	1878.39	5.799
Ecad MO CO	Clone- Clone	h4b2	3.62	342.194	38.424	1150.087	5.799
Ecad MO CO	Clone- Clone	h4b2	3.62	589.083	177.778	1407.375	5.799
Ecad MO CO	Clone- Clone	h4b2	3.62	477.443	125.762	1539.174	5.799
Ecad MO CO	Clone- Clone	h4b2	3.62	416.195	83.672	1382.044	5.799
Ecad MO CO	Clone- Clone	h4b2	3.62	291.54	66.148	1370.035	5.799
Ecad MO CO	Clone- Clone
Ecad MO CO	Clone- Clone	h4b3	7.349	463.83	90.621	1574.814	11.86
Ecad MO CO	Clone- Clone	h4b3	7.349	574.98	111.913	2355.476	11.86
Ecad MO CO	Clone- Clone	h4b3	7.349	560.349	70.099	2297.585	11.86
Ecad MO CO	Clone- Clone	h4b3	7.349	480.294	78.857	2954.197	11.86
Ecad MO CO	Clone- Clone	h4b3	7.241	568.197	103.518	3933.052	11.685
Ecad MO CO	Clone- Clone	h4b3	7.241	481.85	100.843	3219.841	11.685
Ecad MO CO	Clone- Clone	h4b3	7.241	349.575	72.527	2078.985	11.685
Ecad MO CO	Clone- Clone	h4b3	7.241	206.313	21.114	1733.224	11.685
Ecad MO CO	Clone- Clone	h4b3	7.241	157.769	9.941	1420.667	11.685
Ecad MO CO	Clone- Clone
Ecad MO CO	Clone- Clone	h4b4	9.672	221.098	4.79	750.884	15.639
Ecad MO CO	Clone- Clone	h4b4	9.672	313.121	16.488	987.104	15.639
Ecad MO CO	Clone- Clone	h4b4	9.672	410.058	24.894	1478.16	15.639
Ecad MO CO	Clone- Clone	h4b4	9.672	416.441	29.602	1651.41	15.639
Ecad MO CO	Clone- Clone	h4b4	9.672	343.101	40.981	1470.508	15.639
Ecad MO CO	Clone- Clone	h4b4	9.672	314.755	25.91	1528.477	15.639
Ecad MO CO	Clone- Clone	h4b4	9.942	383.914	45.518	1695.185	16.078
Ecad MO CO	Clone- Clone	h4b4	9.942	341.278	53.717	1900.119	16.078
Ecad MO CO	Clone- Clone	h4b4	9.672	295.258	49.506	1173.546	15.639
Ecad MO CO	Clone- Clone	h4b4	9.672	205.781	26.76	1285.393	15.639
Ecad MO CO	Clone- Clone
Ecad MO CO	Clone- Clone	h4b5	8.97	215.815	5.777	890.965	14.497
Ecad MO CO	Clone- Clone	h4b5	8.97	309.44	14.017	1583.864	14.497
Ecad MO CO	Clone- Clone	h4b5	8.97	436.091	26.87	2520.585	14.497
Ecad MO CO	Clone- Clone	h4b5	8.97	498.703	33.311	2270.227	14.497
Ecad MO CO	Clone- Clone	h4b5	8.97	522.313	62.662	1948.228	14.497
Ecad MO CO	Clone- Clone	h4b5	8.97	508.825	47.248	1823.891	14.497
Ecad MO CO	Clone- Clone	h4b5	8.916	588.933	57.643	1962.898	14.408
Ecad MO CO	Clone- Clone	h4b5	8.916	615.847	38.437	1682.66	14.408
Ecad MO CO	Clone- Clone	h4b5	8.916	589.787	47.276	3470.173	14.408
Ecad MO CO	Clone- Clone	h4b5	8.916	477.342	67.399	2077.4	14.408
Ecad MO CO	Clone- Clone
Ecad MO CO	Clone- Clone	h4b6	8.159	195.373	16.642	769.74	13.179
Ecad MO CO	Clone- Clone	h4b6	8.159	257.559	12.919	1227.606	13.179
Ecad MO CO	Clone- Clone	h4b6	8.159	317.28	38.915	1769.093	13.179
Ecad MO CO	Clone- Clone	h4b6	8.159	328.49	33.146	1748.637	13.179
Ecad MO CO	Clone- Clone	h4b6	8.159	316.48	41.298	1555.201	13.179
Ecad MO CO	Clone- Clone	h4b6	8.159	308.912	33.186	1303.393	13.179
Ecad MO CO	Clone- Clone	h4b6	8.159	294.168	41.192	1027.472	13.179
Ecad MO CO	Clone- Clone	h4b6	8.159	283.479	45.124	1063.162	13.179
Ecad MO CO	Clone- Clone	h4b6	8.159	244.528	56.919	849.806	13.179
Ecad MO CO	Clone- Clone	h4b6	8.159	215.734	20.375	934.009	13.179
Ecad MO CO	Clone- Clone	h4b6	8.159	196.565	6.204	752.124	13.179
Ecad MO CO	Clone- Clone
Ecad MO CO	Clone- Clone	h4b7	10.429	219.3	8.312	637.934	16.869
Ecad MO CO	Clone- Clone	h4b7	10.429	341.746	53.519	1410.345	16.869
Ecad MO CO	Clone- Clone	h4b7	10.429	441.551	42.615	2291.158	16.869
Ecad MO CO	Clone- Clone	h4b7	10.429	490.051	50.194	2418.302	16.869
Ecad MO CO	Clone- Clone	h4b7	10.429	466.702	72.961	2101.562	16.869
Ecad MO CO	Clone- Clone	h4b7	10.429	416.31	63.275	1417.502	16.869
Ecad MO CO	Clone- Clone	h4b7	11.023	397.412	80.289	1364.587	17.835
Ecad MO CO	Clone- Clone	h4b7	11.023	429.361	51.55	1117.931	17.835
Ecad MO CO	Clone- Clone	h4b7	11.023	330.017	25.498	1186.289	17.835
Ecad MO CO	Clone- Clone	h4b7	11.023	248.429	6.101	1595.586	17.835
Ecad MO CO	Clone- Clone	h5b1	10.645	432.995	64.772	1615.394	17.22
Ecad MO CO	Clone- Clone	h5b1	10.645	492.356	40.766	1874.891	17.22
Ecad MO CO	Clone- Clone	h5b1	10.645	505.613	25.438	2008.085	17.22
Ecad MO CO	Clone- Clone	h5b1	10.645	494.572	69.866	2170.712	17.22
Ecad MO CO	Clone- Clone	h5b1	10.645	467.32	63.328	2171.535	17.22
Ecad MO CO	Clone- Clone	h5b1	10.645	447.752	61.084	1368.687	17.22
Ecad MO CO	Clone- Clone	h5b1	10.537	522.087	61.181	2635.455	17.044
Ecad MO CO	Clone- Clone	h5b1	10.537	535.235	100.934	3529.238	17.044
Ecad MO CO	Clone- Clone	h5b1	10.537	573.921	77.421	2534.349	17.044
Ecad MO CO	Clone- Clone	h5b1	10.537	593.55	102.043	2929.496	17.044
Ecad MO CO	Clone- Clone	h5b1	10.537	428.916	87.618	1596.553	17.044
Ecad MO CO	Clone- Clone
Ecad MO CO	Clone- Clone	h5b2	11.563	375.84	32.239	1511.399	18.703
Ecad MO CO	Clone- Clone	h5b2	11.563	462.52	29.57	2168.686	18.703
Ecad MO CO	Clone- Clone	h5b2	11.563	513.775	69.569	2797.546	18.703
Ecad MO CO	Clone- Clone	h5b2	11.563	545.883	95.535	3228.665	18.703
Ecad MO CO	Clone- Clone	h5b2	11.455	694.315	132.71	2616.063	18.529
Ecad MO CO	Clone- Clone	h5b2	11.455	629.138	163.365	2625.867	18.529
Ecad MO CO	Clone- Clone	h5b2	11.455	601.956	83.788	2835.098	18.529
Ecad MO CO	Clone- Clone	h5b2	11.455	596.613	76.84	2289.629	18.529
Ecad MO CO	Clone- Clone	h5b2	11.455	542.655	23.607	1761.552	18.529
Ecad MO CO	Clone- Clone
Ecad MO CO	Clone- Clone	h5b3	5.674	310.188	38.357	909.57	9.137
Ecad MO CO	Clone- Clone	h5b3	5.674	385.189	42.929	1132.09	9.137
Ecad MO CO	Clone- Clone	h5b3	5.674	451.441	70.619	1634.501	9.137
Ecad MO CO	Clone- Clone	h5b3	5.674	492.054	77.357	1676.557	9.137
Ecad MO CO	Clone- Clone	h5b3	5.674	477.338	96.831	1778.745	9.137
Ecad MO CO	Clone- Clone	h5b3	5.674	503.249	84.832	1943.926	9.137
Ecad MO CO	Clone- Clone	h5b3	5.674	452.654	73.055	1533.395	9.137
Ecad MO CO	Clone- Clone
Ecad MO CO	Clone- Clone	h5b4	5.89	474.698	69.064	1256.049	9.489
Ecad MO CO	Clone- Clone	h5b4	5.89	529.461	68.213	1287.592	9.489
Ecad MO CO	Clone- Clone	h5b4	5.89	531.92	74.305	1376.241	9.489
Ecad MO CO	Clone- Clone	h5b4	5.89	545.343	109.419	1585.197	9.489
Ecad MO CO	Clone- Clone	h5b4	5.89	521.005	60.033	1801.185	9.489
Ecad MO CO	Clone- Clone	h5b4	5.89	538.584	56.404	2179.839	9.489
Ecad MO CO	Clone- Clone	h5b4	5.89	554.66	52.162	2732.886	9.489
Ecad MO CO	Clone- Clone	h5b4	5.89	553.666	55.511	2106.575	9.489
Ecad MO CO	Clone- Clone	h5b4	5.89	530.328	65.715	1906.471	9.489
Ecad MO CO	Clone- Clone
Ecad MO CO	Clone- Clone	h5b5	8.159	387.091	44.588	1675.723	13.179
Ecad MO CO	Clone- Clone	h5b5	8.159	445.345	61.914	1981.101	13.179
Ecad MO CO	Clone- Clone	h5b5	8.159	431.574	71.907	2303.044	13.179
Ecad MO CO	Clone- Clone	h5b5	8.159	404.006	51.45	2461.796	13.179
Ecad MO CO	Clone- Clone	h5b5	7.943	565.553	72.46	1761.806	12.827
Ecad MO CO	Clone- Clone	h5b5	7.943	430.316	89.063	1154.311	12.827
Ecad MO CO	Clone- Clone	h5b5	7.943	362.457	37.075	1305.186	12.827
Ecad MO CO	Clone- Clone	h5b5	8.321	593.259	84.784	1891.304	13.435
Ecad MO CO	Clone- Clone	h5b5	8.321	505.467	67.882	1574.093	13.435
Ecad MO CO	Clone- Clone	h5b5	8.321	370.378	39.819	1527.413	13.435
Ecad MO CO	Clone- Clone	h6b1	10.104	234.786	2.462	619.725	16.342
Ecad MO CO	Clone- Clone	h6b1	10.104	266.717	37.238	756.966	16.342
Ecad MO CO	Clone- Clone	h6b1	10.104	291.851	40.068	1228.597	16.342
Ecad MO CO	Clone- Clone	h6b1	10.104	299.631	37.883	1134.358	16.342
Ecad MO CO	Clone- Clone	h6b1	10.104	301.581	35.972	1161.529	16.342
Ecad MO CO	Clone- Clone	h6b1	10.104	320.947	27.836	1195.419	16.342
Ecad MO CO	Clone- Clone	h6b1	10.104	306.524	48.538	1942.829	16.342
Ecad MO CO	Clone- Clone
Ecad MO CO	Clone- Clone
Ecad MO CO	Clone- Clone	h6b2	10.807	143.086	13.354	476.848	17.484
Ecad MO CO	Clone- Clone	h6b2	10.807	192.619	21.283	587.855	17.484
Ecad MO CO	Clone- Clone	h6b2	10.807	226.523	32.979	730.711	17.484
Ecad MO CO	Clone- Clone	h6b2	10.807	238.533	30.881	666.152	17.484
Ecad MO CO	Clone- Clone	h6b2	10.807	248.467	24.741	788.079	17.484
Ecad MO CO	Clone- Clone	h6b2	10.807	288.044	26.179	1414.682	17.484
Ecad MO CO	Clone- Clone	h6b2	10.807	306.135	52.25	1742.329	17.484
Ecad MO CO	Clone- Clone	h6b2	10.807	340.771	27.057	2150.024	17.484
Ecad MO CO	Clone- Clone	h6b2	10.807	335.644	37.501	2212.509	17.484
Ecad MO CO	Clone- Clone
Ecad MO CO	Clone- Clone	h6b3	10.104	308.793	30.088	888.546	16.342
Ecad MO CO	Clone- Clone	h6b3	10.104	357.075	61.134	1466.717	16.342
Ecad MO CO	Clone- Clone	h6b3	10.104	372.193	34.926	1785.379	16.342
Ecad MO CO	Clone- Clone	h6b3	10.104	368.448	31.856	1928.493	16.342
Ecad MO CO	Clone- Clone	h6b3	10.104	349.349	55.1	1695.509	16.342
Ecad MO CO	Clone- Clone	h6b3	10.104	271.216	25.562	1763.461	16.342
Ecad MO CO	Clone- Clone	h7b1	8.321	409.819	54.303	1220.718	13.442
Ecad MO CO	Clone- Clone	h7b1	8.321	416.166	55.631	1501.567	13.442
Ecad MO CO	Clone- Clone	h7b1	8.321	379.222	90.963	1623.149	13.442
Ecad MO CO	Clone- Clone	h7b1	8.321	349.646	67.611	1611.075	13.442
Ecad MO CO	Clone- Clone	h7b1	8.321	275.147	33.984	1082.614	13.442
Ecad MO CO	Clone- Clone
Ecad MO CO	Clone- Clone	h7b2	7.889	320.244	53.76	848.159	12.739
Ecad MO CO	Clone- Clone	h7b2	7.889	394.937	69.952	862.216	12.739
Ecad MO CO	Clone- Clone	h7b2	7.889	435.985	34.004	1209.905	12.739
Ecad MO CO	Clone- Clone	h7b2	7.889	450.287	60.335	1373.048	12.739
Ecad MO CO	Clone- Clone	h7b2	7.889	358.793	45.983	996.542	12.739
Ecad MO CO	Clone- Clone	h7b2	7.889	313.915	61.409	887.156	12.739
Ecad MO CO	Clone- Clone	h7b2	7.889	276.305	51.05	801.339	12.739
Ecad MO CO	Clone- Clone
Ecad MO CO	Clone- Clone	h7b3	8.321	204.054	20.111	741.847	13.434
Ecad MO CO	Clone- Clone	h7b3	8.321	253.686	30.293	931.189	13.434
Ecad MO CO	Clone- Clone	h7b3	8.321	253.141	39.892	1154.442	13.434
Ecad MO CO	Clone- Clone	h7b3	8.808	491.492	73.707	1712.503	14.232
Ecad MO CO	Clone- Clone	h7b3	8.808	415.593	65.981	1700.563	14.232
Ecad MO CO	Clone- Clone	h7b3	8.808	377.737	39.39	1911.502	14.232
Ecad MO CO	Clone- Clone	h7b3	8.808	331.857	31.196	1987.76	14.232
Ecad MO CO	Clone- Clone
Ecad MO CO	Clone- Clone	h7b4	3.404	323.84	34.173	1670.059	5.447
Ecad MO CO	Clone- Clone	h7b4	3.404	363.738	30.047	2283.651	5.447
Ecad MO CO	Clone- Clone	h7b4	3.404	373.485	54.05	1902.152	5.447
Ecad MO CO	Clone- Clone	h7b4	3.404	324.197	65.253	990.682	5.447
Ecad MO CO	Clone- Clone	h7b4	3.404	251.408	31.598	884.373	5.447
Ecad MO CO	Clone- Clone	h7b4	3.404	192.364	7.406	531.172	5.447
Ecad MO CO	Clone- Clone
Ecad MO CO	Clone- Clone	h7b5	11.833	270.271	24.716	1104.806	19.153
Ecad MO CO	Clone- Clone	h7b5	11.833	334.926	42.835	1242.338	19.153
Ecad MO CO	Clone- Clone	h7b5	11.833	415.972	78.114	1230.6	19.153
Ecad MO CO	Clone- Clone	h7b5	11.833	356.452	62.01	1444.571	19.153
Ecad MO CO	Clone- Clone	h7b5	11.833	281.292	52.029	1214.152	19.153
Ecad MO CO	Clone- Clone	h7b5	11.833	224.237	13.272	1280.545	19.153
Ecad MO CO	Clone- Clone	h7b5	11.833	184.172	19.841	1406.612	19.153
Ecad MO CO	Clone- Clone
Ecad MO CO	Clone- Clone	h7b6	9.132	339.226	52.042	841.874	14.76
Ecad MO CO	Clone- Clone	h7b6	9.132	380.571	45.836	1344.864	14.76
Ecad MO CO	Clone- Clone	h7b6	9.132	417.093	67.057	1597.256	14.76
Ecad MO CO	Clone- Clone	h7b6	9.132	413.177	63.7	1221.415	14.76
Ecad MO CO	Clone- Clone	h7b6	9.132	403.51	53.035	1460.676	14.76
Ecad MO CO	Clone- Clone	h7b6	9.132	366.518	44.913	1617.876	14.76
Ecad MO CO	Clone- Clone
Ecad MO CO	Clone- Clone	h7b7	3.782	344.177	49.174	1126.784	6.062
Ecad MO CO	Clone- Clone	h7b7	3.782	380.362	22.603	1424.346	6.062
Ecad MO CO	Clone- Clone	h7b7	3.782	345.025	57.586	1394.089	6.062
Ecad MO CO	Clone- Clone	h7b7	3.782	310.651	77.666	1013.955	6.062
Ecad MO CO	Clone- Clone	h7b7	3.782	291.632	79.535	977.247	6.062
Ecad MO CO	Clone- Clone	h7b7	3.782	245.79	36.962	1081.483	6.062
Ecad MO CO	Clone- Clone
Ecad MO CO	Clone- Clone	h7b8	11.401	166.787	19.187	504.902	18.45
Ecad MO CO	Clone- Clone	h7b8	11.401	252.535	23.033	868.792	18.45
Ecad MO CO	Clone- Clone	h7b8	11.401	330.778	36.342	1679.617	18.45
Ecad MO CO	Clone- Clone	h7b8	11.401	380.128	76.104	1431.346	18.45
Ecad MO CO	Clone- Clone	h7b8	11.401	334.658	44.869	1290.986	18.45
Ecad MO CO	Clone- Clone	h7b8	11.401	274.421	36.935	977.352	18.45
Ecad MO CO	Clone- Clone	h7b8	11.401	211.407	14.332	869.643	18.45
Ecad MO CO	Clone- Clone
Ecad MO CO	Clone- Clone	h7b9	9.564	244.339	25.114	842.318	15.463
Ecad MO CO	Clone- Clone	h7b9	9.564	342.316	49.899	1118.376	15.463
Ecad MO CO	Clone- Clone	h7b9	9.564	396.792	33.931	1104.752	15.463
Ecad MO CO	Clone- Clone	h7b9	9.564	411.651	29.95	1636.165	15.463
Ecad MO CO	Clone- Clone	h7b9	9.564	408.05	58.417	1078.919	15.463
Ecad MO CO	Clone- Clone	h7b9	9.564	365.573	68.79	937.377	15.463
Ecad MO CO	Clone- Clone	h7b9	9.564	281.175	45.246	1980.019	15.463
Ecad MO CO	Clone- Clone
Ecad MO CO	Clone- Clone	h7b10	5.511	408.728	58.123	1402.39	8.873
Ecad MO CO	Clone- Clone	h7b10	5.511	477.755	83.368	1711.107	8.873
Ecad MO CO	Clone- Clone	h7b10	5.511	484.044	77.876	1389.818	8.873
Ecad MO CO	Clone- Clone	h7b10	5.511	464.589	74.81	1461.356	8.873
Ecad MO CO	Clone- Clone	h7b10	5.511	387.656	61.309	1011.227	8.873
Ecad MO CO	Clone- Clone	h8b1	13.076	194.68	22.782	889.679	21.171
Ecad MO CO	Clone- Clone	h8b1	13.076	187.567	16.318	1325.461	21.171
Ecad MO CO	Clone- Clone	h8b1	13.076	174.441	3.346	979.348	21.171
Ecad MO CO	Clone- Clone	h8b1	13.076	169.861	5.1	837.812	21.171
Ecad MO CO	Clone- Clone	h8b1	13.076	168.424	2.699	744.255	21.171
Ecad MO CO	Clone- Clone	h8b1	13.076	165.879	4.322	956.782	21.171
Ecad MO CO	Clone- Clone
Ecad MO CO	Clone- Clone	h8b2	12.32	181.435	17.776	777.724	19.944
Ecad MO CO	Clone- Clone	h8b2	12.32	176.968	10.315	904.263	19.944
Ecad MO CO	Clone- Clone	h8b2	12.32	172.094	1.37	771.298	19.944
Ecad MO CO	Clone- Clone	h8b2	12.32	156.505	7.118	796.587	19.944
Ecad MO CO	Clone- Clone	h8b2	13.509	189.437	16.836	1662.16	21.877
Ecad MO CO	Clone- Clone	h8b2	13.509	133.071	2.145	858.211	21.877
Ecad MO CO	Clone- Clone	h8b2	13.509	111.988	1.752	442.649	21.877
Ecad MO CO	Clone- Clone	h8b2	13.509	86.352	1.158	472.73	21.877
Ecad MO CO	Clone- Clone	h8b2	13.509	66.992	0.197	373.687	21.877
Ecad MO CO	Clone- Clone
Ecad MO CO	Clone- Clone	h8b3	7.835	151.515	6.036	816.642	12.652
Ecad MO CO	Clone- Clone	h8b3	7.835	103.297	1.529	392.384	12.652
Ecad MO CO	Clone- Clone	h8b3	7.835	66.514	2.066	415.648	12.652
Ecad MO CO	Clone- Clone	h8b3	7.835	44.847	0.083	217.964	12.652
Ecad MO CO	Clone- Clone	h8b3	7.835	37.771	0.022	239.171	12.652
Ecad MO CO	Clone- Clone	h8b3	7.835	30.649	0	268.092	12.652
Ecad MO CO	Clone- Clone
Ecad MO CO	Clone- Clone	h8b4	8.537	165.234	3.283	1751.257	13.794
Ecad MO CO	Clone- Clone	h8b4	8.537	140.613	0.373	1049.101	13.794
Ecad MO CO	Clone- Clone	h8b4	8.537	79.318	1.173	416.667	13.794
Ecad MO CO	Clone- Clone	h8b4	8.537	65.163	0.285	341.331	13.794
Ecad MO CO	Clone- Clone	h8b4	8.537	51.873	0.142	272.456	13.794
Ecad MO CO	Clone- Clone
Ecad MO CO	Clone- Clone	h8b5	6.754	166.801	30.957	659.434	10.894
Ecad MO CO	Clone- Clone	h8b5	6.754	156.406	15.228	541.465	10.894
Ecad MO CO	Clone- Clone	h8b5	6.754	134.734	9.716	796.87	10.894
Ecad MO CO	Clone- Clone	h8b5	6.754	110.525	1.786	770.966	10.894
Ecad MO CO	Clone- Clone	h8b5	6.754	95.131	1.728	490.493	10.894
Ecad MO CO	Clone- Clone	h8b5	6.754	77.436	1.795	355.804	10.894
Ecad MO CO	Clone- Clone	h8b5	6.754	53.51	0.145	261.195	10.894
Ecad MO CO	Clone- Clone
Ecad MO CO	Clone- Clone	h8b6	10.645	141.27	2.689	538.767	17.22
Ecad MO CO	Clone- Clone	h8b6	10.645	148.852	3.897	911.409	17.22
Ecad MO CO	Clone- Clone	h8b6	10.645	114.552	6.004	622.304	17.22
Ecad MO CO	Clone- Clone	h8b6	10.645	89.64	3.031	317.831	17.22
Ecad MO CO	Clone- Clone	h8b6	10.645	78.349	3.526	316.336	17.22
Ecad MO CO	Clone- Clone	h8b6	10.645	69.752	2.229	308.218	17.22
Ecad MO CO	Clone- Clone	h8b6	10.645	61.138	1.46	315.17	17.22
Ecad MO CO	Clone- Clone	h8b6	10.645	59.401	0.025	420.733	17.22
Ecad MO CO	Clone- Clone
Ecad MO CO	Clone- Clone	h8b7	10.645	166.272	15.748	679.62	17.22
Ecad MO CO	Clone- Clone	h8b7	10.645	153.888	4.307	697.133	17.22
Ecad MO CO	Clone- Clone	h8b7	10.645	140.217	5.91	973.665	17.22
Ecad MO CO	Clone- Clone	h8b7	10.645	124.048	3.774	653.673	17.22
Ecad MO CO	Clone- Clone	h8b7	10.645	110.127	10.184	477.937	17.22
Ecad MO CO	Clone- Clone	h8b7	10.645	96.994	5.716	465.009	17.22
Ecad MO CO	Clone- Clone
Ecad MO CO	Clone- Clone	h8b8	9.348	140.381	6.996	650.802	15.112
Ecad MO CO	Clone- Clone	h8b8	9.348	175.132	3.346	1141.495	15.112
Ecad MO CO	Clone- Clone	h8b8	9.348	163.926	6.092	771.662	15.112
Ecad MO CO	Clone- Clone	h8b8	9.348	138.742	6.581	586.022	15.112
Ecad MO CO	Clone- Clone	h8b8	9.348	104.803	13.592	574.903	15.112
Ecad MO CO	Clone- Clone	h8b8	9.348	89.403	5.539	479.206	15.112
Ecad MO PO	Non Clone- Clone	h2b1	14.913	450.47	28.304	1982.323	24.161
Ecad MO PO	Non Clone- Clone	h2b1	14.913	488.698	8.122	3779.087	24.161
Ecad MO PO	Non Clone- Clone	h2b1	14.913	432.575	55.23	3143.215	24.161
Ecad MO PO	Non Clone- Clone	h2b1	14.913	357.632	11.861	2169.877	24.161
Ecad MO PO	Non Clone- Clone
Ecad MO PO	Non Clone- Clone	h2b2	6.214	303.847	44.847	939.842	10.016
Ecad MO PO	Non Clone- Clone	h2b2	6.214	354.726	37.363	1169.713	10.016
Ecad MO PO	Non Clone- Clone	h2b2	6.214	383.566	55.693	1594.228	10.016
Ecad MO PO	Non Clone- Clone	h2b2	6.268	652.26	133.088	2014.655	10.104
Ecad MO PO	Non Clone- Clone	h2b2	6.268	730.589	76.862	4095	10.104
Ecad MO PO	Non Clone- Clone	h2b2	6.268	639.366	77.197	3887.45	10.104
Ecad MO PO	Non Clone- Clone	h2b2	6.268	423.365	27.381	2025.856	10.104
Ecad MO PO	Non Clone- Clone	h3b1	13.455	318.381	60.693	1178.35	21.789
Ecad MO PO	Non Clone- Clone	h3b1	13.455	377.184	54.578	1087.53	21.789
Ecad MO PO	Non Clone- Clone	h3b1	13.455	398.221	73.27	1452.39	21.789
Ecad MO PO	Non Clone- Clone	h3b1	13.455	396.962	90.024	1512.358	21.789
Ecad MO PO	Non Clone- Clone	h3b1	13.455	367.592	58.461	2237.456	21.789
Ecad MO PO	Non Clone- Clone	h3b1	13.455	300.945	43.371	1199.146	21.789
Ecad MO PO	Non Clone- Clone
Ecad MO PO	Non Clone- Clone	h3b2	10.483	500.364	126.837	2737.232	16.957
Ecad MO PO	Non Clone- Clone	h3b2	10.483	421.807	132.851	2251.807	16.957
Ecad MO PO	Non Clone- Clone	h3b2	10.537	575.651	131.464	2622.953	17.045
Ecad MO PO	Non Clone- Clone	h3b2	10.537	548.839	72.778	1658.492	17.045
Ecad MO PO	Non Clone- Clone	h3b2	10.537	522.13	55.312	2462.111	17.045
Ecad MO PO	Non Clone- Clone	h3b2	10.537	415.619	48.461	2241.64	17.045
Ecad MO PO	Non Clone- Clone
Ecad MO PO	Non Clone- Clone	h3b3	10.483	272.432	11.367	886.955	16.957
Ecad MO PO	Non Clone- Clone	h3b3	10.483	318.051	22.977	997.317	16.957
Ecad MO PO	Non Clone- Clone	h3b3	10.483	340.592	49.289	1064.731	16.957
Ecad MO PO	Non Clone- Clone	h3b3	10.483	347.185	35.047	1355.543	16.957
Ecad MO PO	Non Clone- Clone	h3b3	9.942	444.389	110.214	1174.531	16.078
Ecad MO PO	Non Clone- Clone	h3b3	9.942	469.03	52.516	1594.709	16.078
Ecad MO PO	Non Clone- Clone	h3b3	9.942	471.519	85.655	1563.765	16.078
Ecad MO PO	Non Clone- Clone	h3b3	9.942	410.111	25.371	1305.795	16.078
Ecad MO PO	Non Clone- Clone	h3b3	9.942	324.733	48.378	1757.022	16.078
Ecad MO PO	Non Clone- Clone
Ecad MO PO	Non Clone- Clone	h3b4	11.996	351.995	65.227	1388.055	19.417
Ecad MO PO	Non Clone- Clone	h3b4	11.996	381.471	78.657	1883.042	19.417
Ecad MO PO	Non Clone- Clone	h3b4	11.996	414.084	49.014	1332.686	19.417
Ecad MO PO	Non Clone- Clone	h3b4	11.996	496.637	79.442	2059.52	19.417
Ecad MO PO	Non Clone- Clone	h3b4	10.591	554.19	65.81	3235.153	17.105
Ecad MO PO	Non Clone- Clone	h3b4	10.591	530.303	100.278	3641.6	17.105
Ecad MO PO	Non Clone- Clone	h3b4	10.591	447.451	62.2	1877.015	17.105
Ecad MO PO	Non Clone- Clone	h4b1	8.537	249.62	3.947	1145.671	13.794
Ecad MO PO	Non Clone- Clone	h4b1	8.537	277.05	11.608	1140.979	13.794
Ecad MO PO	Non Clone- Clone	h4b1	8.537	301.586	31.368	1597.776	13.794
Ecad MO PO	Non Clone- Clone	h4b1	8.537	353.084	53.306	2475.269	13.794
Ecad MO PO	Non Clone- Clone	h4b1	8.537	410.4	60.012	2034.375	13.794
Ecad MO PO	Non Clone- Clone	h4b1	8.537	539.254	89.814	1966.816	13.794
Ecad MO PO	Non Clone- Clone	h4b1	8.537	536.363	94.189	1949.165	13.794
Ecad MO PO	Non Clone- Clone	h4b1	8.537	437.424	80.535	1736.764	13.794
Ecad MO PO	Non Clone- Clone
Ecad MO PO	Non Clone- Clone	h4b2	8.97	566.75	109.089	1931.798	14.497
Ecad MO PO	Non Clone- Clone	h4b2	8.97	578.527	117.823	1702.346	14.497
Ecad MO PO	Non Clone- Clone	h4b2	8.97	570.434	134.885	1493.873	14.497
Ecad MO PO	Non Clone- Clone	h4b2	8.97	576.88	118.67	1591.677	14.497
Ecad MO PO	Non Clone- Clone	h4b2	8.97	567.004	109.352	2066.236	14.497
Ecad MO PO	Non Clone- Clone
Ecad MO PO	Non Clone- Clone	h4b3	6.97	476.076	109.007	1539.884	11.246
Ecad MO PO	Non Clone- Clone	h4b3	6.97	527.121	108.931	2066.85	11.246
Ecad MO PO	Non Clone- Clone	h4b3	6.97	581.11	117.891	1951.343	11.246
Ecad MO PO	Non Clone- Clone	h4b3	6.97	561.116	58.255	1753.795	11.246
Ecad MO PO	Non Clone- Clone	h4b3	6.484	562.544	87.326	1600.977	10.455
Ecad MO PO	Non Clone- Clone	h4b3	6.484	430.023	96.047	1776.815	10.455
Ecad MO PO	Non Clone- Clone	h4b3	6.484	303.8	65.697	1449.178	10.455
Ecad MO PO	Non Clone- Clone
Ecad MO PO	Non Clone- Clone	h4b4	12.536	439.628	41.664	1600.785	20.295
Ecad MO PO	Non Clone- Clone	h4b4	12.536	519.119	56.452	2066.32	20.295
Ecad MO PO	Non Clone- Clone	h4b4	12.536	591.724	64.72	2420.117	20.295
Ecad MO PO	Non Clone- Clone	h4b4	12.536	634.145	74.83	2375.784	20.295
Ecad MO PO	Non Clone- Clone	h4b4	12.536	545.234	89.04	1981.154	20.295
Ecad MO PO	Non Clone- Clone	h4b4	11.779	736.446	130.375	3535.277	19.065
Ecad MO PO	Non Clone- Clone	h4b4	11.779	690.294	110.21	3800.881	19.065
Ecad MO PO	Non Clone- Clone	h4b4	11.779	494.024	102.717	1763.13	19.065
Ecad MO PO	Non Clone- Clone
Ecad MO PO	Non Clone- Clone	h4b5	8.159	244.394	18.605	785.262	13.178
Ecad MO PO	Non Clone- Clone	h4b5	8.159	378.304	41.94	1016.911	13.178
Ecad MO PO	Non Clone- Clone	h4b5	8.159	486.574	82.453	1230.971	13.178
Ecad MO PO	Non Clone- Clone	h4b5	8.159	587.18	56.482	1405.337	13.178
Ecad MO PO	Non Clone- Clone	h4b5	8.159	597.033	86.396	1445.241	13.178
Ecad MO PO	Non Clone- Clone	h4b5	8.159	581.925	74.975	1429.057	13.178
Ecad MO PO	Non Clone- Clone	h4b5	8.159	563.655	76.375	1567.461	13.178
Ecad MO PO	Non Clone- Clone	h4b5	9.078	408.931	57.046	1505.195	14.672
Ecad MO PO	Non Clone- Clone	h4b5	9.078	296.763	21.607	1026.747	14.672
Ecad MO PO	Non Clone- Clone	h4b5	9.078	223.937	14.882	884.636	14.672
Ecad MO PO	Non Clone- Clone	h5b1	6.484	368.899	40.829	1665.371	10.455
Ecad MO PO	Non Clone- Clone	h5b1	6.484	395.308	79.776	2204.681	10.455
Ecad MO PO	Non Clone- Clone	h5b1	6.484	434.536	70.564	3073.974	10.455
Ecad MO PO	Non Clone- Clone	h5b1	6.484	477.547	101.849	1711.047	10.455
Ecad MO PO	Non Clone- Clone	h5b1	6.484	531.42	112.766	1605.956	10.455
Ecad MO PO	Non Clone- Clone	h5b1	6.484	523.117	91.662	1484.524	10.455
Ecad MO PO	Non Clone- Clone	h5b1	6.106	554.774	121.573	1698.229	9.838
Ecad MO PO	Non Clone- Clone	h5b1	6.106	586.228	85.045	2374.946	9.838
Ecad MO PO	Non Clone- Clone	h5b1	6.106	700.827	140.828	3775.522	9.838
Ecad MO PO	Non Clone- Clone
Ecad MO PO	Non Clone- Clone	h5b2	7.024	295.481	17.011	1772.609	11.333
Ecad MO PO	Non Clone- Clone	h5b2	7.024	363.738	24.465	2845.45	11.333
Ecad MO PO	Non Clone- Clone	h5b2	7.024	423.307	62.268	2729.677	11.333
Ecad MO PO	Non Clone- Clone	h5b2	7.024	500.688	77.663	3309.9	11.333
Ecad MO PO	Non Clone- Clone	h5b2	7.024	588.523	104.778	2074.262	11.333
Ecad MO PO	Non Clone- Clone	h5b2	7.024	668.209	143.428	1753.563	11.333
Ecad MO PO	Non Clone- Clone	h5b2	7.024	672.656	145.561	1817.045	11.333
Ecad MO PO	Non Clone- Clone	h5b2	7.024	625.212	118.731	2337.753	11.333
Ecad MO PO	Non Clone- Clone	h5b2	6.376	373.728	38.375	1233.028	10.279
Ecad MO PO	Non Clone- Clone	h5b2	6.376	406.086	83.331	1614.553	10.279
Ecad MO PO	Non Clone- Clone	h5b2	6.376	359.593	65.864	1888.664	10.279
Ecad MO PO	Non Clone- Clone	h5b2	6.376	346.102	50.305	1937.045	10.279
Ecad MO PO	Non Clone- Clone
Ecad MO PO	Non Clone- Clone	h5b3	8.105	316.514	7.36	1451.24	13.091
Ecad MO PO	Non Clone- Clone	h5b3	8.105	379.328	38.637	2051.152	13.091
Ecad MO PO	Non Clone- Clone	h5b3	8.105	411.932	55.47	2259.172	13.091
Ecad MO PO	Non Clone- Clone	h5b3	8.105	435.948	62.107	2472.838	13.091
Ecad MO PO	Non Clone- Clone	h5b3	8.105	487.958	77.976	2635.935	13.091
Ecad MO PO	Non Clone- Clone	h5b3	8.105	598.202	91.576	1817.196	13.091
Ecad MO PO	Non Clone- Clone	h5b3	8.105	637.172	93.08	2739.5	13.091
Ecad MO PO	Non Clone- Clone	h5b3	8.105	595.582	70.295	1639.522	13.091
Ecad MO PO	Non Clone- Clone	h5b3	8.105	461.278	45.039	2956.724	13.091
Ecad MO PO	Non Clone- Clone	h6b1	5.025	312.855	49.701	1214.886	8.083
Ecad MO PO	Non Clone- Clone	h6b1	5.025	361.664	71.799	1348.643	8.083
Ecad MO PO	Non Clone- Clone	h6b1	5.025	427.516	93.586	1378.988	8.083
Ecad MO PO	Non Clone- Clone	h6b1	5.025	490.336	119.662	1214.585	8.083
Ecad MO PO	Non Clone- Clone	h6b1	5.025	489.673	107.471	1355.381	8.083
Ecad MO PO	Non Clone- Clone	h6b1	5.025	470.989	132.625	1664.134	8.083
Ecad MO PO	Non Clone- Clone	h6b1	5.025	388.637	55.123	1960.86	8.083
Ecad MO PO	Non Clone- Clone
Ecad MO PO	Non Clone- Clone	h6b2	7.133	232.631	1.25	999.036	11.509
Ecad MO PO	Non Clone- Clone	h6b2	7.133	273.748	0.323	1005.463	11.509
Ecad MO PO	Non Clone- Clone	h6b2	7.133	294.493	17.55	1108.554	11.509
Ecad MO PO	Non Clone- Clone	h6b2	7.133	306.47	23.637	1218.188	11.509
Ecad MO PO	Non Clone- Clone	h6b2	7.133	315.308	52.53	1051.182	11.509
Ecad MO PO	Non Clone- Clone	h6b2	7.133	311.441	59.457	1176.55	11.509
Ecad MO PO	Non Clone- Clone	h6b2	7.133	299.915	27.089	1298.396	11.509
Ecad MO PO	Non Clone- Clone
Ecad MO PO	Non Clone- Clone	h6b3	8.267	277.329	37.509	815.81	13.355
Ecad MO PO	Non Clone- Clone	h6b3	8.267	341.793	36.88	845.863	13.355
Ecad MO PO	Non Clone- Clone	h6b3	8.267	365.914	35.6	859.839	13.355
Ecad MO PO	Non Clone- Clone	h6b3	8.267	372.98	45.954	945.189	13.355
Ecad MO PO	Non Clone- Clone	h6b3	8.267	325.092	51.935	943.104	13.355
Ecad MO PO	Non Clone- Clone	h6b3	8.267	314.057	51.578	876.046	13.355
Ecad MO PO	Non Clone- Clone	h6b3	8.267	293.935	40.457	1136.16	13.355
Ecad MO PO	Non Clone- Clone
Ecad MO PO	Non Clone- Clone	h6b4	10.483	252.749	32.919	866.031	16.957
Ecad MO PO	Non Clone- Clone	h6b4	10.483	315.798	48.937	971.512	16.957
Ecad MO PO	Non Clone- Clone	h6b4	10.483	371.675	57.404	1223.607	16.957
Ecad MO PO	Non Clone- Clone	h6b4	10.483	407.011	87.752	1240.645	16.957
Ecad MO PO	Non Clone- Clone	h6b4	10.483	448.7	106.958	1432.391	16.957
Ecad MO PO	Non Clone- Clone	h6b4	10.483	524.272	121.762	3400.751	16.957
Ecad MO PO	Non Clone- Clone	h6b4	10.483	513.806	71.174	3183.123	16.957
Ecad MO PO	Non Clone- Clone	h6b4	10.483	461.584	50.85	3954.163	16.957
Ecad MO PO	Non Clone- Clone
Ecad MO PO	Non Clone- Clone	h6b5	8.105	446.859	105.05	1933.214	13.091
Ecad MO PO	Non Clone- Clone	h6b5	8.105	542.295	121.838	2930.625	13.091
Ecad MO PO	Non Clone- Clone	h6b5	8.105	618.528	103.279	3343.291	13.091
Ecad MO PO	Non Clone- Clone	h6b5	8.105	765.438	122.914	2603.162	13.091
Ecad MO PO	Non Clone- Clone	h6b5	8.105	776.867	80.528	3964.1	13.091
Ecad MO PO	Non Clone- Clone	h6b5	8.105	686.75	110.682	3574.375	13.091
Ecad MO PO	Non Clone- Clone	h6b5	8.105	497.313	49.23	1731.421	13.091
Ecad MO PO	Non Clone- Clone	h7b1	9.888	387.46	83.238	1327.479	15.99
Ecad MO PO	Non Clone- Clone	h7b1	9.888	412.975	102.884	1494.592	15.99
Ecad MO PO	Non Clone- Clone	h7b1	9.888	365.362	98.534	1178.276	15.99
Ecad MO PO	Non Clone- Clone	h7b1	8.483	430.571	123.727	1680.938	13.705
Ecad MO PO	Non Clone- Clone
Ecad MO PO	Non Clone- Clone	h7b2	10.645	340.18	25.453	1394.64	17.22
Ecad MO PO	Non Clone- Clone	h7b2	10.645	381.558	38.967	1327.692	17.22
Ecad MO PO	Non Clone- Clone	h7b2	10.645	353.231	59.846	1586.573	17.22
Ecad MO PO	Non Clone- Clone	h7b2	10.645	297.626	37.762	1426.567	17.22
Ecad MO PO	Non Clone- Clone	h7b2	9.996	407.173	36.604	1561.567	16.166
Ecad MO PO	Non Clone- Clone	h7b2	9.996	458.401	66.601	2016.526	16.166
Ecad MO PO	Non Clone- Clone
Ecad MO PO	Non Clone- Clone	h7b3	4.431	271.125	13.52	1254.455	7.117
Ecad MO PO	Non Clone- Clone	h7b3	4.431	299.279	18.856	1105.587	7.117
Ecad MO PO	Non Clone- Clone	h7b3	4.431	327.425	68.72	1126.431	7.117
Ecad MO PO	Non Clone- Clone	h7b3	4.431	410.273	56.402	3861.945	7.117
Ecad MO PO	Non Clone- Clone	h7b3	4.431	350.689	21.734	2954.527	7.117
Ecad MO PO	Non Clone- Clone
Ecad MO PO	Non Clone- Clone	h7b4	7.943	331.941	21.246	1453.587	12.827
Ecad MO PO	Non Clone- Clone	h7b4	7.943	354.386	45.373	1918.582	12.827
Ecad MO PO	Non Clone- Clone	h7b4	7.943	358.05	57.414	1431.882	12.827
Ecad MO PO	Non Clone- Clone	h7b4	7.943	352.797	64.805	1182.254	12.827
Ecad MO PO	Non Clone- Clone	h7b4	7.943	331.608	53.291	1423.341	12.827
Ecad MO PO	Non Clone- Clone	h8b1	8.645	319.738	48.532	2369.244	13.97
Ecad MO PO	Non Clone- Clone	h8b1	8.645	266.577	34.207	1958.281	13.97
Ecad MO PO	Non Clone- Clone	h8b1	8.645	190.768	4.014	1097.002	13.97
Ecad MO PO	Non Clone- Clone	h8b1	8.645	121.895	1.408	735.412	13.97
Ecad MO PO	Non Clone- Clone
Ecad MO PO	Non Clone- Clone	h8b2	9.132	417.632	47.142	3301.765	14.76
Ecad MO PO	Non Clone- Clone	h8b2	9.132	379.192	46.197	2003.552	14.76
Ecad MO PO	Non Clone- Clone	h8b2	9.132	273.006	11.179	1214.425	14.76
Ecad MO PO	Non Clone- Clone	h8b2	9.132	195.096	10.05	1154.388	14.76
Ecad MO PO	Non Clone- Clone	h8b2	9.132	146.885	10.392	1972.942	14.76
Ecad MO PO	Non Clone- Clone	h8b2	9.132	95.104	2.711	1242.51	14.76
Ecad MO PO	Non Clone- Clone
Ecad MO PO	Non Clone- Clone	h8b3	10.321	405.458	27.052	2065.454	16.693
Ecad MO PO	Non Clone- Clone	h8b3	10.321	356.765	41.748	1759.557	16.693
Ecad MO PO	Non Clone- Clone	h8b3	11.131	358.286	44.921	3216.925	18.011
Ecad MO PO	Non Clone- Clone	h8b3	11.131	271.738	37.779	1016.848	18.011
Ecad MO PO	Non Clone- Clone	h8b3	11.131	216.266	31.056	1613.334	18.011
Ecad MO PO	Non Clone- Clone	h8b3	11.131	185.198	24.163	1873.825	18.011
Ecad MO PO	Non Clone- Clone	h8b3	11.131	169.252	7.663	1975.123	18.011
Ecad MO PO	Non Clone- Clone
Ecad MO PO	Non Clone- Clone	h8b4	10.699	520.934	58.158	2483.771	17.308
Ecad MO PO	Non Clone- Clone	h8b4	10.699	476.627	71.069	4071.975	17.308
Ecad MO PO	Non Clone- Clone	h8b4	10.699	328.948	45.042	2695.664	17.308
Ecad MO PO	Non Clone- Clone	h8b4	10.699	245.249	13.961	2401.222	17.308
Ecad MO PO	Non Clone- Clone	h8b4	10.699	197.131	19.444	1399.733	17.308
Ecad MO PO	Non Clone- Clone	h8b4	10.699	150.827	5.046	582.898	17.308
Ecad MO PO	Non Clone- Clone
Ecad MO PO	Non Clone- Clone	h8b5	18.966	382.116	10.963	1999.739	30.75
Ecad MO PO	Non Clone- Clone	h8b5	18.966	387.771	19.863	3098.475	30.75
Ecad MO PO	Non Clone- Clone	h8b5	18.966	384.502	19.961	3399.476	30.75
Ecad MO PO	Non Clone- Clone	h8b5	18.966	353.124	27.055	3577.486	30.75
Ecad MO PO	Non Clone- Clone	h8b5	18.966	243.803	10.959	2425.718	30.75
Ecad MO PO	Non Clone- Clone	h8b5	18.966	146.501	3.335	644.533	30.75
Ecad MO PO	Non Clone- Clone	h8b5	18.966	114.963	0.722	3663.782	30.75
Ecad MO PO	Non Clone- Clone
Ecad MO PO	Non Clone- Clone	h8b6	12.482	402.77	53.29	2894.124	20.207
Ecad MO PO	Non Clone- Clone	h8b6	12.482	396.31	59.284	2390.547	20.207
Ecad MO PO	Non Clone- Clone	h8b6	12.482	291.583	29.268	1122.864	20.207
Ecad MO PO	Non Clone- Clone	h8b6	12.482	235.079	29.513	904.347	20.207
Ecad MO PO	Non Clone- Clone
Ecad MO PO	Non Clone- Clone	h8b9	13.563	323.429	15.88	4095	21.965
Ecad MO PO	Non Clone- Clone	h8b9	13.563	308.842	16.509	4095	21.965
Ecad MO PO	Non Clone- Clone	h8b9	13.563	284.024	17.603	3581.533	21.965
Ecad MO PO	Non Clone- Clone	h8b9	13.563	237.914	24.034	1662.88	21.965
Ecad MO PO	Non Clone- Clone	h8b9	13.563	184.865	4.603	1811.249	21.965
Ecad MO PO	Non Clone- Clone	h8b9	13.563	151.352	5.896	1043.291	21.965
Ecad MO PO	Non Clone- Clone
Ecad MO PO	Non Clone- Clone	h8b10	10.212	433.773	14.887	2981.996	16.507
Ecad MO PO	Non Clone- Clone	h8b10	10.212	401.201	53.098	1424.977	16.507
Ecad MO PO	Non Clone- Clone	h8b10	10.212	362.144	16.883	1351.373	16.507
Ecad MO PO	Non Clone- Clone	h8b10	10.212	297.157	13.915	2127.807	16.507
Ecad MO PO	Non Clone- Clone	h8b10	10.212	276.866	8.333	1337.729	16.507
Ecad MO PO	Non Clone- Clone	h8b10	10.212	262.883	1.325	1349.709	16.507
Ecad MO PO	Non Clone- Clone	h8b10	10.212	237.013	6.044	1496.741	16.507
Ecad MO NO	Non Clone- Non Clone	h2b1	10.104	335.546	17.955	1263.626	16.342
Ecad MO NO	Non Clone- Non Clone	h2b1	10.104	411.808	31.81	1995.626	16.342
Ecad MO NO	Non Clone- Non Clone	h2b1	10.104	481.59	51.229	3052.444	16.342
Ecad MO NO	Non Clone- Non Clone	h2b1	10.375	595.61	70.139	2959.325	16.781
Ecad MO NO	Non Clone- Non Clone	h2b1	10.375	511.502	48.898	2618.441	16.781
Ecad MO NO	Non Clone- Non Clone	h2b1	10.375	439.852	42.861	4085.015	16.781
Ecad MO NO	Non Clone- Non Clone
Ecad MO NO	Non Clone- Non Clone	h2b2	11.239	300.141	41.497	902.832	18.187
Ecad MO NO	Non Clone- Non Clone	h2b2	11.239	386.536	30.23	1390.04	18.187
Ecad MO NO	Non Clone- Non Clone	h2b2	11.239	455.771	59.628	2072.711	18.187
Ecad MO NO	Non Clone- Non Clone	h2b2	11.239	476.822	73.56	2162.88	18.187
Ecad MO NO	Non Clone- Non Clone	h2b2	11.239	514.022	95.132	4005.294	18.187
Ecad MO NO	Non Clone- Non Clone
Ecad MO NO	Non Clone- Non Clone	h2b3	11.185	226.071	29.235	675.867	18.099
Ecad MO NO	Non Clone- Non Clone	h2b3	11.185	320.361	48.561	888.73	18.099
Ecad MO NO	Non Clone- Non Clone	h2b3	11.185	418.288	46.082	1407.406	18.099
Ecad MO NO	Non Clone- Non Clone	h2b3	11.185	462.824	58.839	1566.191	18.099
Ecad MO NO	Non Clone- Non Clone	h2b3	11.185	433.892	16.877	1975.641	18.099
Ecad MO NO	Non Clone- Non Clone	h2b3	11.185	388.742	13.619	3778.531	18.099
Ecad MO NO	Non Clone- Non Clone
Ecad MO NO	Non Clone- Non Clone	h2b4	6.7	261.154	29.665	672.414	10.802
Ecad MO NO	Non Clone- Non Clone	h2b4	6.7	388.539	49.366	1700.665	10.802
Ecad MO NO	Non Clone- Non Clone	h2b4	6.7	543.542	86.242	2170.366	10.802
Ecad MO NO	Non Clone- Non Clone	h2b4	6.7	604.122	117.106	3687.84	10.802
Ecad MO NO	Non Clone- Non Clone	h2b4	6.7	601.756	98.52	2938.245	10.802
Ecad MO NO	Non Clone- Non Clone	h2b4	6.7	599.163	116.624	3106.417	10.802
Ecad MO NO	Non Clone- Non Clone	h2b4	6.7	536.983	135.124	2617.277	10.802
Ecad MO NO	Non Clone- Non Clone
Ecad MO NO	Non Clone- Non Clone	h2b5	9.024	199.693	9.811	834.415	14.584
Ecad MO NO	Non Clone- Non Clone	h2b5	9.024	289.63	21.078	1029.282	14.584
Ecad MO NO	Non Clone- Non Clone	h2b5	9.024	401.48	29.32	1485.702	14.584
Ecad MO NO	Non Clone- Non Clone	h2b5	9.024	454.666	40.681	1663.368	14.584
Ecad MO NO	Non Clone- Non Clone	h2b5	9.024	424.833	78.467	2642.077	14.584
Ecad MO NO	Non Clone- Non Clone	h2b5	9.186	472.959	53.22	2299.823	14.848
Ecad MO NO	Non Clone- Non Clone	h2b5	9.186	454.327	51.828	2289.262	14.848
Ecad MO NO	Non Clone- Non Clone	h2b5	9.186	353.699	26.253	1463.002	14.848
Ecad MO NO	Non Clone- Non Clone	h2b5	9.186	212.089	3.042	1590.377	14.848
Ecad MO NO	Non Clone- Non Clone
Ecad MO NO	Non Clone- Non Clone	h2b6	9.132	270.1	26.242	1064.203	14.746
Ecad MO NO	Non Clone- Non Clone	h2b6	9.132	393.355	40.661	1903.142	14.746
Ecad MO NO	Non Clone- Non Clone	h2b6	9.132	467.653	77.23	2515.691	14.746
Ecad MO NO	Non Clone- Non Clone	h2b6	9.132	457.686	101.391	1664.144	14.746
Ecad MO NO	Non Clone- Non Clone	h2b6	9.078	523.434	73.583	1686.432	14.653
Ecad MO NO	Non Clone- Non Clone	h2b6	9.078	451.853	31.503	1613.489	14.653
Ecad MO NO	Non Clone- Non Clone	h3b1	9.726	434.223	54.587	1215.921	15.727
Ecad MO NO	Non Clone- Non Clone	h3b1	9.726	459.199	65.723	1371.91	15.727
Ecad MO NO	Non Clone- Non Clone	h3b1	9.726	467.45	25.097	1232.041	15.727
Ecad MO NO	Non Clone- Non Clone	h3b1	9.726	464.725	53.277	1779.525	15.727
Ecad MO NO	Non Clone- Non Clone	h3b1	9.618	626.837	90.503	2066.808	15.551
Ecad MO NO	Non Clone- Non Clone	h3b1	9.618	590.08	25.978	2970.913	15.551
Ecad MO NO	Non Clone- Non Clone
Ecad MO NO	Non Clone- Non Clone	h3b2	9.456	405.899	70.993	1911.964	15.287
Ecad MO NO	Non Clone- Non Clone	h3b2	9.456	423.284	35.336	1716.943	15.287
Ecad MO NO	Non Clone- Non Clone	h3b2	9.456	405.071	78.975	1312.514	15.287
Ecad MO NO	Non Clone- Non Clone	h3b2	9.456	368.822	94.571	1990.254	15.287
Ecad MO NO	Non Clone- Non Clone	h3b2	9.456	261.97	30.521	1835.866	15.287
Ecad MO NO	Non Clone- Non Clone
Ecad MO NO	Non Clone- Non Clone	h3b3	7.619	249.874	34.039	849.194	12.298
Ecad MO NO	Non Clone- Non Clone	h3b3	7.619	272.82	43.317	638.234	12.298
Ecad MO NO	Non Clone- Non Clone	h3b3	7.619	287.187	31.483	952.114	12.298
Ecad MO NO	Non Clone- Non Clone	h3b3	7.619	311.188	43.071	923.751	12.298
Ecad MO NO	Non Clone- Non Clone	h3b3	7.619	322.646	49.342	1314.041	12.298
Ecad MO NO	Non Clone- Non Clone	h3b3	7.619	264.187	45.905	842.942	12.298
Ecad MO NO	Non Clone- Non Clone
Ecad MO NO	Non Clone- Non Clone	h3b4	10.212	460.51	75.454	1238.725	16.517
Ecad MO NO	Non Clone- Non Clone	h3b4	10.212	477.682	114.236	1538.452	16.517
Ecad MO NO	Non Clone- Non Clone	h3b4	10.212	493.874	113.601	1327.659	16.517
Ecad MO NO	Non Clone- Non Clone	h3b4	10.212	513.218	44.543	1458.597	16.517
Ecad MO NO	Non Clone- Non Clone	h3b4	10.212	545.847	85.75	3101.598	16.517
Ecad MO NO	Non Clone- Non Clone	h3b4	10.212	418.806	16.49	3583.428	16.517
Ecad MO NO	Non Clone- Non Clone
Ecad MO NO	Non Clone- Non Clone	h3b5	9.456	503.313	89.756	1347.253	15.287
Ecad MO NO	Non Clone- Non Clone	h3b5	9.456	547.24	86.723	2133.016	15.287
Ecad MO NO	Non Clone- Non Clone	h3b5	9.456	539.635	73.614	1544.77	15.287
Ecad MO NO	Non Clone- Non Clone	h3b5	9.456	515.26	76.437	1357.372	15.287
Ecad MO NO	Non Clone- Non Clone	h3b5	9.51	632.702	55.769	2414.681	15.375
Ecad MO NO	Non Clone- Non Clone	h3b5	9.51	594.985	22.855	2773.602	15.375
Ecad MO NO	Non Clone- Non Clone	h3b5	9.51	542.931	12.145	3083.628	15.375
Ecad MO NO	Non Clone- Non Clone
Ecad MO NO	Non Clone- Non Clone	h3b6	6.214	352.946	11.764	1230.567	10.016
Ecad MO NO	Non Clone- Non Clone	h3b6	6.214	376.925	28.808	1340.799	10.016
Ecad MO NO	Non Clone- Non Clone	h3b6	6.214	421.846	59.586	1849.749	10.016
Ecad MO NO	Non Clone- Non Clone	h3b6	5.89	643.176	126.502	3446.705	9.489
Ecad MO NO	Non Clone- Non Clone	h3b6	5.89	661.524	136.017	3733.209	9.489
Ecad MO NO	Non Clone- Non Clone	h3b6	5.89	633.491	106.806	2763.582	9.489
Ecad MO NO	Non Clone- Non Clone	h3b6	5.89	518.152	67.492	1608.154	9.489
Ecad MO NO	Non Clone- Non Clone	h4b1	8.591	505.937	26.334	2701.595	13.881
Ecad MO NO	Non Clone- Non Clone	h4b1	8.591	559.832	20.369	3413.131	13.881
Ecad MO NO	Non Clone- Non Clone	h4b1	8.591	592.512	22.703	3180.956	13.881
Ecad MO NO	Non Clone- Non Clone	h4b1	8.591	597.393	9.371	3098.614	13.881
Ecad MO NO	Non Clone- Non Clone	h4b1	7.457	685.63	163.865	2235.422	12.03
Ecad MO NO	Non Clone- Non Clone	h4b1	7.457	645.913	96.722	1781.109	12.03
Ecad MO NO	Non Clone- Non Clone	h4b1	7.457	546.27	38.843	1864.792	12.03
Ecad MO NO	Non Clone- Non Clone	h4b1	7.457	383.096	11.372	1192.548	12.03
Ecad MO NO	Non Clone- Non Clone
Ecad MO NO	Non Clone- Non Clone	h4b2	11.671	305.931	33.328	1254.359	18.881
Ecad MO NO	Non Clone- Non Clone	h4b2	11.671	395.559	49.56	2283.272	18.881
Ecad MO NO	Non Clone- Non Clone	h4b2	11.671	418.401	53.055	2581.279	18.881
Ecad MO NO	Non Clone- Non Clone	h4b2	11.509	590.975	55.887	2430.317	18.609
Ecad MO NO	Non Clone- Non Clone	h4b2	11.509	640.647	82.682	2463.472	18.609
Ecad MO NO	Non Clone- Non Clone	h4b2	11.509	657.743	71.406	2416.668	18.609
Ecad MO NO	Non Clone- Non Clone	h4b2	11.509	634.476	94.685	2039.243	18.609
Ecad MO NO	Non Clone- Non Clone	h4b2	11.509	512.222	81.058	2412.027	18.609
Ecad MO NO	Non Clone- Non Clone	h4b2	11.509	340.23	39.769	1858.879	18.609
Ecad MO NO	Non Clone- Non Clone
Ecad MO NO	Non Clone- Non Clone	h4b3	7.024	409.615	72.236	1164.638	11.334
Ecad MO NO	Non Clone- Non Clone	h4b3	7.024	543.896	84.909	1708.83	11.334
Ecad MO NO	Non Clone- Non Clone	h4b3	7.024	624.895	100.942	1706.325	11.334
Ecad MO NO	Non Clone- Non Clone	h4b3	7.024	698.083	130.923	2122.196	11.334
Ecad MO NO	Non Clone- Non Clone	h4b3	7.024	718.447	66.607	2502.065	11.334
Ecad MO NO	Non Clone- Non Clone	h4b3	7.024	757.25	132.355	3286.378	11.334
Ecad MO NO	Non Clone- Non Clone	h4b3	7.024	763.759	121.541	3801.758	11.334
Ecad MO NO	Non Clone- Non Clone	h4b3	7.024	688.726	91.42	3733.401	11.334
Ecad MO NO	Non Clone- Non Clone	h4b3	7.024	554.598	85.383	2716.155	11.334
Ecad MO NO	Non Clone- Non Clone
Ecad MO NO	Non Clone- Non Clone	h4b4	8.267	332.501	51.079	1018.995	13.354
Ecad MO NO	Non Clone- Non Clone	h4b4	8.267	450.261	65.369	1195.373	13.354
Ecad MO NO	Non Clone- Non Clone	h4b4	8.267	510.033	75.697	1372.495	13.354
Ecad MO NO	Non Clone- Non Clone	h4b4	8.267	550.972	89.72	1742.653	13.354
Ecad MO NO	Non Clone- Non Clone	h4b4	8.267	533.183	107.138	2208.675	13.354
Ecad MO NO	Non Clone- Non Clone	h4b4	8.267	481.482	58.163	2321.193	13.354
Ecad MO NO	Non Clone- Non Clone	h4b4	8.7	776.54	33.94	2872.276	14.057
Ecad MO NO	Non Clone- Non Clone	h4b4	8.7	651.742	68.965	2797.767	14.057
Ecad MO NO	Non Clone- Non Clone	h4b4	8.7	472.877	48.714	2784.531	14.057
Ecad MO NO	Non Clone- Non Clone
Ecad MO NO	Non Clone- Non Clone	h4b5	10.861	456.774	50.989	1350.673	17.571
Ecad MO NO	Non Clone- Non Clone	h4b5	10.861	538.593	56.029	1685.494	17.571
Ecad MO NO	Non Clone- Non Clone	h4b5	10.861	674.612	147.819	2305.332	17.571
Ecad MO NO	Non Clone- Non Clone	h4b5	10.861	773.495	128.458	2426.552	17.571
Ecad MO NO	Non Clone- Non Clone	h4b5	10.861	650.65	108.767	2640.588	17.571
Ecad MO NO	Non Clone- Non Clone	h4b5	11.077	681.798	139.577	2332.868	17.923
Ecad MO NO	Non Clone- Non Clone	h4b5	11.077	760.973	102.553	2197.109	17.923
Ecad MO NO	Non Clone- Non Clone	h4b5	11.077	643.653	155.777	1972.966	17.923
Ecad MO NO	Non Clone- Non Clone
Ecad MO NO	Non Clone- Non Clone	h4b6	11.833	370.529	56.637	1202.237	19.153
Ecad MO NO	Non Clone- Non Clone	h4b6	11.833	522.962	78.692	1692.775	19.153
Ecad MO NO	Non Clone- Non Clone	h4b6	11.833	551.936	72.822	1908.225	19.153
Ecad MO NO	Non Clone- Non Clone	h4b6	11.833	559.944	60.619	2059.843	19.153
Ecad MO NO	Non Clone- Non Clone	h4b6	12.482	771.125	118.985	3155.048	20.207
Ecad MO NO	Non Clone- Non Clone	h4b6	12.482	734.767	105.359	4095	20.207
Ecad MO NO	Non Clone- Non Clone	h4b6	12.482	631.365	136.077	3612.992	20.207
Ecad MO NO	Non Clone- Non Clone	h4b6	12.482	459.006	71.856	2042.831	20.207
Ecad MO NO	Non Clone- Non Clone	h4b6	12.482	320.806	58.228	2220.177	20.207
Ecad MO NO	Non Clone- Non Clone
Ecad MO NO	Non Clone- Non Clone	h4b7	7.187	404.075	23.752	1777.359	11.597
Ecad MO NO	Non Clone- Non Clone	h4b7	7.187	448.244	16.278	1900.967	11.597
Ecad MO NO	Non Clone- Non Clone	h4b7	7.187	535.682	46.57	2666.513	11.597
Ecad MO NO	Non Clone- Non Clone	h4b7	7.187	585.848	40.457	2043.146	11.597
Ecad MO NO	Non Clone- Non Clone	h4b7	7.187	580.032	71.37	2056.723	11.597
Ecad MO NO	Non Clone- Non Clone	h4b7	7.187	556.223	126.79	2018.641	11.597
Ecad MO NO	Non Clone- Non Clone	h4b7	7.187	521.285	90.603	2403.01	11.597
Ecad MO NO	Non Clone- Non Clone	h4b7	7.187	454.86	54.782	1865.776	11.597
Ecad MO NO	Non Clone- Non Clone	h4b7	7.187	258.077	20.359	1289.039	11.597
Ecad MO NO	Non Clone- Non Clone
Ecad MO NO	Non Clone- Non Clone	h4b8	8.645	232.037	31.612	723.843	13.97
Ecad MO NO	Non Clone- Non Clone	h4b8	8.645	361.747	74.518	1095.835	13.97
Ecad MO NO	Non Clone- Non Clone	h4b8	8.645	376.478	64.034	1172.256	13.97
Ecad MO NO	Non Clone- Non Clone	h4b8	8.645	375.397	46.518	1294.491	13.97
Ecad MO NO	Non Clone- Non Clone	h4b8	8.645	398.565	96.874	1438.111	13.97
Ecad MO NO	Non Clone- Non Clone	h4b8	8.645	471.862	67.501	2017.257	13.97
Ecad MO NO	Non Clone- Non Clone	h4b8	8.645	529.628	77.609	2600.794	13.97
Ecad MO NO	Non Clone- Non Clone	h4b8	8.645	531.013	48.84	2515.062	13.97
Ecad MO NO	Non Clone- Non Clone	h4b8	8.645	543.21	84.723	2130.244	13.97
Ecad MO NO	Non Clone- Non Clone	h4b8	6.106	638.669	57.565	1919.479	9.84
Ecad MO NO	Non Clone- Non Clone	h4b8	6.106	604.63	102.429	2087.861	9.84
Ecad MO NO	Non Clone- Non Clone	h4b8	6.106	531.328	112.426	2704.324	9.84
Ecad MO NO	Non Clone- Non Clone	h4b8	6.106	388.506	88.421	1387.661	9.84
Ecad MO NO	Non Clone- Non Clone	h5b1	14.697	229.538	0.646	1769.5	23.81
Ecad MO NO	Non Clone- Non Clone	h5b1	14.697	258.749	3.481	2707.924	23.81
Ecad MO NO	Non Clone- Non Clone	h5b1	14.697	256.762	11.321	2786.41	23.81
Ecad MO NO	Non Clone- Non Clone	h5b1	14.697	260.501	25.384	1776.472	23.81
Ecad MO NO	Non Clone- Non Clone	h5b1	13.725	567.44	91.95	2979.236	22.228
Ecad MO NO	Non Clone- Non Clone	h5b1	13.725	495.655	58.594	2217.454	22.228
Ecad MO NO	Non Clone- Non Clone	h5b1	13.725	452.627	87.018	1812.072	22.228
Ecad MO NO	Non Clone- Non Clone	h5b1	13.725	421.229	67.108	2017.189	22.228
Ecad MO NO	Non Clone- Non Clone	h5b1	13.725	392.751	28.501	1448.409	22.228
Ecad MO NO	Non Clone- Non Clone	h5b1	13.725	335.74	52.331	1165.265	22.228
Ecad MO NO	Non Clone- Non Clone
Ecad MO NO	Non Clone- Non Clone	h5b2	10.591	265.045	3.562	816.168	17.132
Ecad MO NO	Non Clone- Non Clone	h5b2	10.591	311.865	31.356	763.313	17.132
Ecad MO NO	Non Clone- Non Clone	h5b2	10.591	351.011	74.411	843.327	17.132
Ecad MO NO	Non Clone- Non Clone	h5b2	10.591	372.813	46.968	932.973	17.132
Ecad MO NO	Non Clone- Non Clone	h5b2	10.591	387.789	43.387	1176.235	17.132
Ecad MO NO	Non Clone- Non Clone	h5b2	10.591	357.083	5.967	1515.236	17.132
Ecad MO NO	Non Clone- Non Clone	h5b2	10.591	374.936	5.524	1386.353	17.132
Ecad MO NO	Non Clone- Non Clone	h5b2	10.591	430.004	2.129	3044.102	17.132
Ecad MO NO	Non Clone- Non Clone
Ecad MO NO	Non Clone- Non Clone	h5b3	8.537	307.899	21.631	1023.818	13.794
Ecad MO NO	Non Clone- Non Clone	h5b3	8.537	365.936	44.925	1374.059	13.794
Ecad MO NO	Non Clone- Non Clone	h5b3	8.537	387.109	49.267	1787.48	13.794
Ecad MO NO	Non Clone- Non Clone	h5b3	8.537	400.213	48.034	2207.624	13.794
Ecad MO NO	Non Clone- Non Clone	h5b3	8.537	391.252	57.517	2181.44	13.794
Ecad MO NO	Non Clone- Non Clone	h5b3	8.537	454.649	20.558	2180.67	13.794
Ecad MO NO	Non Clone- Non Clone	h5b3	8.537	469.854	66.563	1566.398	13.794
Ecad MO NO	Non Clone- Non Clone	h5b3	8.537	481.951	66.16	1825.445	13.794
Ecad MO NO	Non Clone- Non Clone
Ecad MO NO	Non Clone- Non Clone	h5b4	5.782	257.891	1.85	921.839	9.313
Ecad MO NO	Non Clone- Non Clone	h5b4	5.782	284.831	16.984	1222.94	9.313
Ecad MO NO	Non Clone- Non Clone	h5b4	5.782	259.949	12.748	1325.091	9.313
Ecad MO NO	Non Clone- Non Clone	h5b4	5.782	246.216	29.676	1341.104	9.313
Ecad MO NO	Non Clone- Non Clone	h5b4	5.782	233.342	22.057	1229.7	9.313
Ecad MO NO	Non Clone- Non Clone	h5b4	5.782	228.191	31.951	990.533	9.313
Ecad MO NO	Non Clone- Non Clone	h5b4	5.836	457.23	71.955	1243.361	9.401
Ecad MO NO	Non Clone- Non Clone	h5b4	5.836	461.035	100.066	1434.536	9.401
Ecad MO NO	Non Clone- Non Clone	h5b4	5.836	379.102	52.393	1284.263	9.401
Ecad MO NO	Non Clone- Non Clone
Ecad MO NO	Non Clone- Non Clone	h5b5	7.835	270.465	28.084	800.852	12.652
Ecad MO NO	Non Clone- Non Clone	h5b5	7.835	285.43	32.725	993.093	12.652
Ecad MO NO	Non Clone- Non Clone	h5b5	7.835	258.383	13.455	954.821	12.652
Ecad MO NO	Non Clone- Non Clone	h5b5	7.835	224.163	16.07	838.392	12.652
Ecad MO NO	Non Clone- Non Clone	h5b5	7.835	205.043	14.868	726.835	12.652
Ecad MO NO	Non Clone- Non Clone	h6b1	8.051	313.008	9.954	1016.304	13.003
Ecad MO NO	Non Clone- Non Clone	h6b1	8.051	389.078	31.599	1307.616	13.003
Ecad MO NO	Non Clone- Non Clone	h6b1	8.051	490.627	89.931	1269.649	13.003
Ecad MO NO	Non Clone- Non Clone	h6b1	8.051	616.492	88.071	1542.835	13.003
Ecad MO NO	Non Clone- Non Clone	h6b1	8.051	732.138	196.616	2338.452	13.003
Ecad MO NO	Non Clone- Non Clone	h6b1	8.051	697.87	120.114	2127.782	13.003
Ecad MO NO	Non Clone- Non Clone	h6b1	8.051	638.086	143.368	2796.137	13.003
Ecad MO NO	Non Clone- Non Clone	h6b1	8.051	503.84	97.28	3250.392	13.003
Ecad MO NO	Non Clone- Non Clone
Ecad MO NO	Non Clone- Non Clone	h6b2	9.888	291.182	30.719	916.934	15.99
Ecad MO NO	Non Clone- Non Clone	h6b2	9.888	382.092	38.877	1399.443	15.99
Ecad MO NO	Non Clone- Non Clone	h6b2	9.888	450.593	58.07	2165.535	15.99
Ecad MO NO	Non Clone- Non Clone	h6b2	9.888	485.482	77.853	2009.08	15.99
Ecad MO NO	Non Clone- Non Clone	h6b2	10.212	704.554	87.671	2023.212	16.517
Ecad MO NO	Non Clone- Non Clone	h6b2	10.212	741.129	104.076	1881.619	16.517
Ecad MO NO	Non Clone- Non Clone	h6b2	10.212	757.017	140.737	2058.92	16.517
Ecad MO NO	Non Clone- Non Clone	h6b2	10.212	634.656	192.933	1518.514	16.517
Ecad MO NO	Non Clone- Non Clone
Ecad MO NO	Non Clone- Non Clone	h6b3	6.268	386.412	52.544	1326.702	10.104
Ecad MO NO	Non Clone- Non Clone	h6b3	6.268	452.634	84.64	1569.807	10.104
Ecad MO NO	Non Clone- Non Clone	h6b3	6.268	542.042	92.582	1997.472	10.104
Ecad MO NO	Non Clone- Non Clone	h6b3	6.268	613.526	74.965	1897.408	10.104
Ecad MO NO	Non Clone- Non Clone	h6b3	6.268	631.734	81.972	1568.681	10.104
Ecad MO NO	Non Clone- Non Clone	h6b3	6.268	654.767	122.156	2116.433	10.104
Ecad MO NO	Non Clone- Non Clone	h6b3	6.268	596.577	123.879	1848.819	10.104
Ecad MO NO	Non Clone- Non Clone	h6b3	6.268	452.63	48.301	1519.403	10.104
Ecad MO NO	Non Clone- Non Clone
Ecad MO NO	Non Clone- Non Clone	h6b4	11.131	278.065	19.515	997.592	18.011
Ecad MO NO	Non Clone- Non Clone	h6b4	11.131	356.526	34.797	1027.095	18.011
Ecad MO NO	Non Clone- Non Clone	h6b4	11.131	391.503	58.91	1733.354	18.011
Ecad MO NO	Non Clone- Non Clone	h6b4	11.131	400.154	96.032	1848.15	18.011
Ecad MO NO	Non Clone- Non Clone	h6b4	11.131	389.909	80.747	1248.296	18.011
Ecad MO NO	Non Clone- Non Clone	h6b4	11.131	392.003	58.702	1168.974	18.011
Ecad MO NO	Non Clone- Non Clone	h6b4	11.131	423.809	41.615	1593.232	18.011
Ecad MO NO	Non Clone- Non Clone	h6b4	11.131	437.711	47.316	3624.62	18.011
Ecad MO NO	Non Clone- Non Clone	h6b4	11.131	406.044	16.487	1495.594	18.011
Ecad MO NO	Non Clone- Non Clone	h6b4	11.131	352.86	3.353	1749.827	18.011
Ecad MO NO	Non Clone- Non Clone
Ecad MO NO	Non Clone- Non Clone	h6b5	9.672	359.797	22.966	875.685	15.639
Ecad MO NO	Non Clone- Non Clone	h6b5	9.672	395.934	18.188	1126.455	15.639
Ecad MO NO	Non Clone- Non Clone	h6b5	9.672	398.748	22.745	1122.786	15.639
Ecad MO NO	Non Clone- Non Clone	h6b5	9.672	403.227	36.962	1486.137	15.639
Ecad MO NO	Non Clone- Non Clone	h6b5	9.672	354.327	24.978	1437.575	15.639
Ecad MO NO	Non Clone- Non Clone	h6b5	9.672	320.487	9.004	1181.201	15.639
Ecad MO NO	Non Clone- Non Clone	h6b5	9.672	289.885	8.461	1097.147	15.639
Ecad MO NO	Non Clone- Non Clone
Ecad MO NO	Non Clone- Non Clone	h6b6	8.591	299.046	56.949	989.361	13.846
Ecad MO NO	Non Clone- Non Clone	h6b6	8.591	325.843	48.093	1121.532	13.846
Ecad MO NO	Non Clone- Non Clone	h6b6	8.591	362.993	50.503	1237.032	13.846
Ecad MO NO	Non Clone- Non Clone	h6b6	8.591	402.724	66.674	1415.844	13.846
Ecad MO NO	Non Clone- Non Clone	h6b6	8.591	410.059	30.117	1820.588	13.846
Ecad MO NO	Non Clone- Non Clone	h6b6	8.591	387.076	49.102	1780.995	13.846
Ecad MO NO	Non Clone- Non Clone	h6b6	8.591	279.92	30.569	1415.761	13.846
Ecad MO NO	Non Clone- Non Clone
Ecad MO NO	Non Clone- Non Clone	h6b7	7.835	365.526	0	930.208	12.652
Ecad MO NO	Non Clone- Non Clone	h6b7	7.835	460.476	0	1415.613	12.652
Ecad MO NO	Non Clone- Non Clone	h6b7	7.835	555.521	0	1922.099	12.652
Ecad MO NO	Non Clone- Non Clone	h6b7	7.835	599.219	0	1962.509	12.652
Ecad MO NO	Non Clone- Non Clone	h6b7	7.835	648.788	0	2744.114	12.652
Ecad MO NO	Non Clone- Non Clone	h6b7	7.835	677.712	0	4095	12.652
Ecad MO NO	Non Clone- Non Clone	h6b7	7.835	617.004	0	4095	12.652
Ecad MO NO	Non Clone- Non Clone	h6b7	7.835	438.717	0	3627.485	12.652
Ecad MO NO	Non Clone- Non Clone	h7b1	8.754	303.31	47.378	675.449	14.145
Ecad MO NO	Non Clone- Non Clone	h7b1	8.754	441.427	62.015	1456.952	14.145
Ecad MO NO	Non Clone- Non Clone	h7b1	8.754	591.138	104.695	2141.204	14.145
Ecad MO NO	Non Clone- Non Clone	h7b1	8.754	803.39	138.888	3067.841	14.145
Ecad MO NO	Non Clone- Non Clone	h7b1	8.754	699.916	135.587	2746.112	14.145
Ecad MO NO	Non Clone- Non Clone	h7b1	8.754	445.021	89.934	1834.497	14.145
Ecad MO NO	Non Clone- Non Clone
Ecad MO NO	Non Clone- Non Clone	h7b2	9.132	260.386	37.991	782.689	14.76
Ecad MO NO	Non Clone- Non Clone	h7b2	9.132	421.273	85.641	1487.899	14.76
Ecad MO NO	Non Clone- Non Clone	h7b2	9.132	563.921	95.865	2388.156	14.76
Ecad MO NO	Non Clone- Non Clone	h7b2	9.132	623.981	105.759	2457.767	14.76
Ecad MO NO	Non Clone- Non Clone	h7b2	9.132	500.352	100.595	1529.623	14.76
Ecad MO NO	Non Clone- Non Clone	h7b2	9.132	421.321	80.14	2646.385	14.76
Ecad MO NO	Non Clone- Non Clone	h7b2	9.132	322.08	58.748	2893.589	14.76
Ecad MO NO	Non Clone- Non Clone	h7b2	9.132	241.411	42.361	1709.353	14.76
Ecad MO NO	Non Clone- Non Clone
Ecad MO NO	Non Clone- Non Clone	h7b3	8.159	309.217	41.547	805.546	13.179
Ecad MO NO	Non Clone- Non Clone	h7b3	8.159	460.29	58.08	1658.41	13.179
Ecad MO NO	Non Clone- Non Clone	h7b3	8.159	548.605	66.28	2462.873	13.179
Ecad MO NO	Non Clone- Non Clone	h7b3	8.159	527.054	137.83	2207.896	13.179
Ecad MO NO	Non Clone- Non Clone	h7b3	8.159	470.679	95.129	1626.7	13.179
Ecad MO NO	Non Clone- Non Clone	h7b3	8.159	438.557	60.235	1719.732	13.179
Ecad MO NO	Non Clone- Non Clone	h7b3	8.159	352.745	57.563	1413.033	13.179
Ecad MO NO	Non Clone- Non Clone
Ecad MO NO	Non Clone- Non Clone	h7b4	6.538	491.257	110.654	2023.61	10.543
Ecad MO NO	Non Clone- Non Clone	h7b4	6.538	529.798	101.212	1830.733	10.543
Ecad MO NO	Non Clone- Non Clone	h7b4	6.538	584.549	131.04	2047.485	10.543
Ecad MO NO	Non Clone- Non Clone	h7b4	6.538	550.863	145.825	2298.455	10.543
Ecad MO NO	Non Clone- Non Clone	h7b4	6.538	413.867	72.902	1659.77	10.543
Ecad MO NO	Non Clone- Non Clone
Ecad MO NO	Non Clone- Non Clone	h7b5	6.106	379.666	86.326	1114.521	9.84
Ecad MO NO	Non Clone- Non Clone	h7b5	6.106	461.652	75.684	1561.973	9.84
Ecad MO NO	Non Clone- Non Clone	h7b5	6.106	464.634	72.144	1379.213	9.84
Ecad MO NO	Non Clone- Non Clone	h7b5	6.106	376.513	108.575	887.961	9.84
Ecad MO NO	Non Clone- Non Clone	h7b5	6.106	383.445	109.063	1540.789	9.84
Ecad MO NO	Non Clone- Non Clone	h7b5	6.106	354.909	71.647	1573.914	9.84
Ecad MO NO	Non Clone- Non Clone	h7b5	6.106	1337.146	393.547	3134.335	9.84
Ecad MO CO	Clone- Clone	h1b1	20.857	216.655	10.621	822.761	33.825
Ecad MO CO	Clone- Clone	h1b1	20.857	271.713	24.201	1204.317	33.825
Ecad MO CO	Clone- Clone	h1b1	20.857	331.862	32.268	1398.243	33.825
Ecad MO CO	Clone- Clone	h1b1	20.857	342.853	34.324	1111.516	33.825
Ecad MO CO	Clone- Clone	h1b1	20.857	267.349	26.936	1266.511	33.825
Ecad MO CO	Clone- Clone	h1b1	20.857	227.987	13.127	1377.503	33.825
Ecad MO PO	Non Clone- Clone	h1b1	13.076	314.029	16.168	1354.179	21.174
Ecad MO PO	Non Clone- Clone	h1b1	13.076	355.997	13.803	1850.244	21.174
Ecad MO PO	Non Clone- Clone	h1b1	13.076	345.425	29.051	1493.312	21.174
Ecad MO PO	Non Clone- Clone	h1b1	13.076	291.725	19.361	1599.913	21.174
Ecad MO PO	Non Clone- Clone	h1b1	13.076	270.083	5.02	2635.768	21.174
Ecad MO PO	Non Clone- Clone
Ecad MO PO	Non Clone- Clone	h1b2	14.535	266.669	36.63	932.442	23.546
Ecad MO PO	Non Clone- Clone	h1b2	14.535	302.901	34.633	992.51	23.546
Ecad MO PO	Non Clone- Clone	h1b2	14.535	343.698	40.003	1841.574	23.546
Ecad MO PO	Non Clone- Clone	h1b2	14.535	317.985	32.581	1581.914	23.546
Ecad MO PO	Non Clone- Clone	h1b2	14.535	287.747	13.926	1289.805	23.546
Ecad MO PO
Ecad MO PO
Ecad MO PO
Ecad MO NO	Non Clone- Non Clone	h1b1	13.022	382.661	9.153	1306.669	21.048
Ecad MO NO	Non Clone- Non Clone	h1b1	13.022	482.2	31.368	2269.312	21.048
Ecad MO NO	Non Clone- Non Clone	h1b1	13.022	528.838	22.472	2394.466	21.048
Ecad MO NO	Non Clone- Non Clone	h1b1	13.022	493.086	79.607	1826.279	21.048
Ecad MO NO	Non Clone- Non Clone	h1b1	13.022	438.489	57.783	1764.336	21.048
Ecad MO NO	Non Clone- Non Clone	h1b1	13.022	350.917	42.321	1283.05	21.048
Ecad MO NO	Non Clone- Non Clone
Ecad MO NO	Non Clone- Non Clone	h1b2	10.104	238.741	37.71	671.759	16.342
Ecad MO NO	Non Clone- Non Clone	h1b2	10.104	275.517	24.803	913.686	16.342
Ecad MO NO	Non Clone- Non Clone	h1b2	10.104	303.602	40.032	960.928	16.342
Ecad MO NO	Non Clone- Non Clone	h1b2	10.104	293.155	43.23	1310.831	16.342
Ecad MO NO	Non Clone- Non Clone	h1b2	10.104	271.398	34.903	1635.563	16.342
Ecad MO NO	Non Clone- Non Clone	h1b2	10.375	285.674	25.286	2101.656	16.781
Ecad MO NO	Non Clone- Non Clone	h1b2	10.375	268.244	13.872	1604.907	16.781
Ecad MO NO	Non Clone- Non Clone
Ecad MO NO	Non Clone- Non Clone	h1b3	11.617	145.025	0	526.063	18.802
Ecad MO NO	Non Clone- Non Clone	h1b3	11.617	225.711	0.679	764.081	18.802
Ecad MO NO	Non Clone- Non Clone	h1b3	11.509	334.098	16.266	1109	18.626
Ecad MO NO	Non Clone- Non Clone	h1b3	11.509	418.978	14.694	1534.105	18.626
Ecad MO NO	Non Clone- Non Clone	h1b3	11.509	405.317	21.283	1320.096	18.626
Ecad MO NO	Non Clone- Non Clone	h1b3	11.996	464.041	89.127	1767.122	19.417
Ecad MO NO	Non Clone- Non Clone	h1b3	11.996	416.326	38.909	1851.789	19.417
