# Supplementary material for: Stepwise polarisation of developing bilayered epidermis is mediated by aPKC and E-cadherin in zebrafish
Source: eLife journal article supplement (doi:10.7554/elife.49064), 2020-01-22
Supplement: fig5-data2 [file elife-49064-fig5-data2-v1.csv]

Genotype	Boundary	Cell name	Area	Mean	Min	Max	Length
Ctrl MO C-C	Clone- Clone	h1b1	9.348	704.144	171.594	3253.401	15.112
Ctrl MO C-C	Clone- Clone	h1b1	9.348	640.616	95.543	2912.744	15.112
Ctrl MO C-C	Clone- Clone	h1b1	9.348	534.21	131.006	2078.634	15.112
Ctrl MO C-C	Clone- Clone	h1b1	9.348	432.701	94.457	2261.401	15.112
Ctrl MO C-C	Clone- Clone	h1b1	8.213	561.749	154.598	2023.293	13.267
Ctrl MO C-C	Clone- Clone	h1b1	8.213	438.282	104.007	1800.135	13.267
Ctrl MO C-C	Clone- Clone	h1b1	8.213	470.113	69.847	2210.385	13.267
Ctrl MO C-C	Clone- Clone
Ctrl MO C-C	Clone- Clone	h1b2	8.213	561.749	154.598	2023.293	13.267
Ctrl MO C-C	Clone- Clone	h1b2	8.213	438.282	104.007	1800.135	13.267
Ctrl MO C-C	Clone- Clone	h1b2	8.213	470.113	69.847	2210.385	13.267
Ctrl MO C-C	Clone- Clone
Ctrl MO C-C	Clone- Clone	h1b3	6.052	525.754	181.817	3150.258	9.752
Ctrl MO C-C	Clone- Clone	h1b3	6.052	616.955	216.289	1721.953	9.752
Ctrl MO C-C	Clone- Clone	h1b3	6.052	548.011	193.162	2064.985	9.752
Ctrl MO C-C	Clone- Clone	h1b3	6.052	437.265	139.517	1513.103	9.752
Ctrl MO C-C	Clone- Clone	h1b3	6.052	362.847	94.112	853.418	9.752
Ctrl MO C-C	Clone- Clone
Ctrl MO C-C	Clone- Clone	h1b4	7.619	946.928	204.295	3657.897	12.3
Ctrl MO C-C	Clone- Clone	h1b4	7.619	672.636	149.99	2369.386	12.3
Ctrl MO C-C	Clone- Clone	h1b4	7.619	506.938	81.587	1627.745	12.3
Ctrl MO C-C	Clone- Clone	h1b4	7.619	367.501	77.383	1047.017	12.3
Ctrl MO C-C	Clone- Clone	h1b4	4.701	546.12	76.979	2205.612	7.556
Ctrl MO C-C	Clone- Clone	h1b4	4.701	433.872	87.313	1695.685	7.556
Ctrl MO C-C	Clone- Clone	h1b4	4.701	284.392	45.619	811.229	7.556
Ctrl MO C-C	Clone- Clone	h1b4	4.701	182.997	9.191	822.195	7.556
Ctrl MO C-C	Clone- Clone
Ctrl MO C-C	Clone- Clone	h1b5	8.375	637.876	93.539	2887.615	13.53
Ctrl MO C-C	Clone- Clone	h1b5	8.375	563.421	53.263	1867.686	13.53
Ctrl MO C-C	Clone- Clone	h1b5	8.375	468.022	61.691	2069.599	13.53
Ctrl MO C-C	Clone- Clone	h1b5	8.375	384.335	43.557	1573.517	13.53
Ctrl MO C-C	Clone- Clone	h1b5	8.375	292.679	37.139	1455.343	13.53
Ctrl MO C-C	Clone- Clone	h1b5	8.375	190.325	29.435	617.799	13.53
Ctrl MO C-C	Clone- Clone
Ctrl MO C-C	Clone- Clone	h1b6	9.24	509.978	56.136	2304.395	14.936
Ctrl MO C-C	Clone- Clone	h1b6	9.24	403.306	52.266	1602.321	14.936
Ctrl MO C-C	Clone- Clone	h1b6	9.24	321.997	26.527	1310.742	14.936
Ctrl MO C-C	Clone- Clone	h1b6	9.24	278.971	6.046	1144.367	14.936
Ctrl MO C-C	Clone- Clone	h1b6	9.24	220.792	18.435	1038.238	14.936
Ctrl MO C-C	Clone- Clone	h1b6	9.24	172.689	0.888	1166.508	14.936
Ctrl MO C-C	Clone- Clone
Ctrl MO C-C	Clone- Clone	h1b7	7.078	828.709	193.798	2374.831	11.422
Ctrl MO C-C	Clone- Clone	h1b7	7.078	572.954	103.088	1980.893	11.422
Ctrl MO C-C	Clone- Clone	h1b7	7.078	315.306	36.482	1465.848	11.422
Ctrl MO C-C	Clone- Clone	h1b7	7.078	244.739	29.153	1098.112	11.422
Ctrl MO C-C	Clone- Clone	h1b7	7.078	188.901	11.564	858.386	11.422
Ctrl MO C-C	Clone- Clone
Ctrl MO C-C	Clone- Clone	h1b8	8.591	1468.754	155.452	4095	13.882
Ctrl MO C-C	Clone- Clone	h1b8	8.591	930.872	100.488	3560.636	13.882
Ctrl MO C-C	Clone- Clone	h1b8	8.591	367.339	55.52	1100.09	13.882
Ctrl MO C-C	Clone- Clone	h1b8	8.591	252.248	6.865	880.438	13.882
Ctrl MO C-C	Clone- Clone	h1b8	8.591	187.172	11.657	982.672	13.882
Ctrl MO C-C	Clone- Clone
Ctrl MO C-C	Clone- Clone	h1b9	8.483	949.589	173.321	3906.235	13.706
Ctrl MO C-C	Clone- Clone	h1b9	8.483	653.249	108.596	3372.629	13.706
Ctrl MO C-C	Clone- Clone	h1b9	8.483	292.572	42.228	1347.303	13.706
Ctrl MO C-C	Clone- Clone	h1b9	8.483	207.654	14.564	667.99	13.706
Ctrl MO C-C	Clone- Clone	h1b9	8.483	154.263	9.355	455.795	13.706
Ctrl MO C-C	Clone- Clone
Ctrl MO C-C	Clone- Clone	h1b10	7.511	1429.91	265.349	3576.676	12.125
Ctrl MO C-C	Clone- Clone	h1b10	7.511	731.618	145.719	1818.957	12.125
Ctrl MO C-C	Clone- Clone	h1b10	7.511	533.556	149.513	1437.734	12.125
Ctrl MO C-C	Clone- Clone	h1b10	7.511	413.2	87.824	1229.876	12.125
Ctrl MO C-C	Clone- Clone
Ctrl MO C-C	Clone- Clone	h1b11	4.917	345.921	131.843	1025.735	7.907
Ctrl MO C-C	Clone- Clone	h1b11	4.917	254.65	78.486	1342.869	7.907
Ctrl MO C-C	Clone- Clone	h1b11	4.917	196.367	48.695	1038.994	7.907
Ctrl MO C-C	Clone- Clone	h1b11	4.917	153.113	30.933	445.644	7.907
Ctrl MO C-C	Clone- Clone
Ctrl MO C-C	Clone- Clone	h1b12	2.702	589.22	184.942	1562.419	4.305
Ctrl MO C-C	Clone- Clone	h1b12	2.702	339.129	125.581	706.091	4.305
Ctrl MO C-C	Clone- Clone	h1b12	2.702	242.029	57.258	581.596	4.305
Ctrl MO C-C	Clone- Clone	h1b12	2.702	186.296	64.014	381.226	4.305
Ctrl MO C-C	Clone- Clone
Ctrl MO C-C	Clone- Clone	h1b13	3.188	1082.105	131.764	4041.115	5.096
Ctrl MO C-C	Clone- Clone	h1b13	3.188	602.963	44.552	2489.701	5.096
Ctrl MO C-C	Clone- Clone	h1b13	3.188	410.188	48.836	1486.68	5.096
Ctrl MO C-C	Clone- Clone
Ctrl MO C-C	Clone- Clone	h1b14	9.726	894.888	164.223	4095	15.727
Ctrl MO C-C	Clone- Clone	h1b14	9.726	895.682	141.929	4095	15.727
Ctrl MO C-C	Clone- Clone	h1b14	9.726	774.899	95.175	4095	15.727
Ctrl MO C-C	Clone- Clone	h1b14	9.726	497.781	45.545	2210.426	15.727
Ctrl MO C-C	Clone- Clone	h1b14	9.726	304.1	39.679	1371.583	15.727
Ctrl MO C-C	Clone- Clone
Ctrl MO C-C	Clone- Clone	h1b15	10.861	776.552	98.708	3055.468	17.572
Ctrl MO C-C	Clone- Clone	h1b15	10.861	622.736	114.781	1521.752	17.572
Ctrl MO C-C	Clone- Clone	h1b15	10.861	476.977	88.623	2123.805	17.572
Ctrl MO C-C	Clone- Clone	h1b15	10.861	335.742	88.203	2161.517	17.572
Ctrl MO C-C	Clone- Clone	h1b15	10.861	297.671	64.224	1396.721	17.572
Ctrl MO C-C	Clone- Clone
Ctrl MO C-C	Clone- Clone	h1b16	5.241	737.181	172.279	1922.916	8.434
Ctrl MO C-C	Clone- Clone	h1b16	5.241	444.936	119.376	1217.435	8.434
Ctrl MO C-C	Clone- Clone	h1b16	5.241	414.391	116.201	2199.913	8.434
Ctrl MO C-C	Clone- Clone	h1b16	5.241	429.443	91.535	3565.539	8.434
Ctrl MO C-C	Clone- Clone	h1b16	5.241	429.564	93.407	2102.77	8.434
Ctrl MO C-C	Clone- Clone
Ctrl MO C-C	Clone- Clone	h1b17	12.752	631.276	77.174	2486.924	20.647
Ctrl MO C-C	Clone- Clone	h1b17	12.752	441.951	41.333	2270.752	20.647
Ctrl MO C-C	Clone- Clone	h1b17	12.752	368.134	22.23	1635.509	20.647
Ctrl MO C-C	Clone- Clone	h1b17	12.752	333.827	34.359	2297.046	20.647
Ctrl MO C-C	Clone- Clone	h1b17	12.752	290.602	2.671	4073.135	20.647
Ctrl MO C-C	Clone- Clone	h1b17	12.752	258.5	3.191	2215.444	20.647
Ctrl MO C-C	Clone- Clone
Ctrl MO C-C	Clone- Clone	h1b18	7.403	739.556	136.349	3602.067	11.949
Ctrl MO C-C	Clone- Clone	h1b18	7.403	482.945	83.727	1412.656	11.949
Ctrl MO C-C	Clone- Clone	h1b18	7.403	353.356	69.841	1134.187	11.949
Ctrl MO C-C	Clone- Clone	h1b18	7.403	274.436	22.511	1067.629	11.949
Ctrl MO C-C	Clone- Clone
Ctrl MO C-C	Clone- Clone	h1b19	8.645	1237.679	51.921	4095	13.97
Ctrl MO C-C	Clone- Clone	h1b19	8.645	971.952	83.617	3034.951	13.97
Ctrl MO C-C	Clone- Clone	h1b19	8.645	773.22	111.287	2329.389	13.97
Ctrl MO C-C	Clone- Clone	h1b19	8.645	633.626	99.711	3224.356	13.97
Ctrl MO C-C	Clone- Clone	h1b19	8.645	565.258	120.999	2959.777	13.97
Ctrl MO C-C	Clone- Clone	h1b19	8.645	540.523	53.541	3880.782	13.97
Ctrl MO C-C	Clone- Clone
Ctrl MO C-C	Clone- Clone	h1b20	5.457	1088.882	227.361	3605.517	8.768
Ctrl MO C-C	Clone- Clone	h1b20	5.457	959.479	226.093	3339.187	8.768
Ctrl MO C-C	Clone- Clone	h1b20	5.457	651.917	192.849	1726.825	8.768
Ctrl MO C-C	Clone- Clone	h1b20	5.457	369.671	105.357	1231.41	8.768
Ctrl MO C-C	Clone- Clone	h1b20	5.457	294.419	63.109	2494.381	8.768
Ctrl MO C-C	Clone- Clone	h2b1	9.726	490.542	61.961	3358.8	15.726
Ctrl MO C-C	Clone- Clone	h2b1	9.726	242.627	53.515	832.898	15.726
Ctrl MO C-C	Clone- Clone	h2b1	9.726	165.166	10.391	771.32	15.726
Ctrl MO C-C	Clone- Clone	h2b1	9.726	143.06	4.241	1187.453	15.726
Ctrl MO C-C	Clone- Clone
Ctrl MO C-C	Clone- Clone	h2b2	9.078	527.128	57.934	2262.42	14.672
Ctrl MO C-C	Clone- Clone	h2b2	9.078	491.471	66.527	2401.11	14.672
Ctrl MO C-C	Clone- Clone	h2b2	9.078	403.279	80.451	1259.176	14.672
Ctrl MO C-C	Clone- Clone	h2b2	9.078	284.279	41.304	1022.658	14.672
Ctrl MO C-C	Clone- Clone	h2b2	9.078	257.936	25.325	1116.443	14.672
Ctrl MO C-C	Clone- Clone
Ctrl MO C-C	Clone- Clone	h2b3	14.805	632.366	72.853	3054.515	23.985
Ctrl MO C-C	Clone- Clone	h2b3	14.805	546.841	68.499	3054.106	23.985
Ctrl MO C-C	Clone- Clone	h2b3	14.805	479.053	49.622	3349.373	23.985
Ctrl MO C-C	Clone- Clone	h2b3	14.805	441.79	39.328	3744.181	23.985
Ctrl MO C-C	Clone- Clone	h2b3	14.805	412.353	50.505	2527.753	23.985
Ctrl MO C-C	Clone- Clone
Ctrl MO C-C	Clone- Clone	h2b4	13.671	671.1	125.172	3406.852	22.14
Ctrl MO C-C	Clone- Clone	h2b4	13.671	493.663	104.942	2815.111	22.14
Ctrl MO C-C	Clone- Clone	h2b4	13.671	390.244	76.309	1551.323	22.14
Ctrl MO C-C	Clone- Clone	h2b4	13.671	315	24.578	1249.615	22.14
Ctrl MO C-C	Clone- Clone
Ctrl MO C-C	Clone- Clone	h2b5	5.457	609.272	185.355	1673.46	8.786
Ctrl MO C-C	Clone- Clone	h2b5	5.457	398.092	55.433	1647.535	8.786
Ctrl MO C-C	Clone- Clone	h2b5	5.457	322.406	100.947	1094.491	8.786
Ctrl MO C-C	Clone- Clone	h2b5	5.457	329.539	78.171	933.498	8.786
Ctrl MO C-C	Clone- Clone
Ctrl MO C-C	Clone- Clone	h2b6	7.078	874.799	89.679	2577.795	11.42
Ctrl MO C-C	Clone- Clone	h2b6	7.078	739.534	105.307	2576.966	11.42
Ctrl MO C-C	Clone- Clone	h2b6	7.078	568.873	107.696	1898.284	11.42
Ctrl MO C-C	Clone- Clone	h2b6	7.078	405.29	128.059	1561.675	11.42
Ctrl MO C-C	Clone- Clone	h3b1	7.078	809.75	179.583	3869.416	11.422
Ctrl MO C-C	Clone- Clone	h3b1	7.078	685.048	116.292	3211.91	11.422
Ctrl MO C-C	Clone- Clone	h3b1	7.078	519.108	129.49	2105.908	11.422
Ctrl MO C-C	Clone- Clone	h3b1	7.078	551.676	103.948	2239.8	11.422
Ctrl MO C-C	Clone- Clone
Ctrl MO C-C	Clone- Clone	h3b2	7.349	630.979	83.255	2178.469	11.861
Ctrl MO C-C	Clone- Clone	h3b2	7.349	593.537	111.735	1917.057	11.861
Ctrl MO C-C	Clone- Clone	h3b2	7.349	365.948	70.643	1303.929	11.861
Ctrl MO C-C	Clone- Clone	h3b2	7.349	353.251	35.459	2315.509	11.861
Ctrl MO C-C	Clone- Clone
Ctrl MO C-C	Clone- Clone	h3b3	4.863	595.548	160.738	2424.72	7.819
Ctrl MO C-C	Clone- Clone	h3b3	4.863	472.92	132.832	2815.969	7.819
Ctrl MO C-C	Clone- Clone	h3b3	4.863	502.631	106.836	2365.56	7.819
Ctrl MO C-C	Clone- Clone	h3b3	4.863	508.755	89.916	2479.188	7.819
Ctrl MO C-C	Clone- Clone
Ctrl MO C-C	Clone- Clone	h3b4	5.133	993.995	191.999	3728.188	8.259
Ctrl MO C-C	Clone- Clone	h3b4	5.133	561.866	117.867	1716.975	8.259
Ctrl MO C-C	Clone- Clone	h3b4	5.133	467.908	88.434	2478.099	8.259
Ctrl MO C-C	Clone- Clone
Ctrl MO C-C	Clone- Clone	h3b5	15.184	713.212	42.552	4093.588	24.6
Ctrl MO C-C	Clone- Clone	h3b5	15.184	759.15	38.045	3645.012	24.6
Ctrl MO C-C	Clone- Clone	h3b5	15.184	586.849	63.714	2508.722	24.6
Ctrl MO C-C	Clone- Clone	h3b5	15.184	449.231	27.567	4008.932	24.6
Ctrl MO C-C	Clone- Clone	h3b5	15.184	387.482	54.222	4012.177	24.6
Ctrl MO C-C	Clone- Clone
Ctrl MO C-C	Clone- Clone	h3b6	8.267	588.341	29.933	2636.8	13.355
Ctrl MO C-C	Clone- Clone	h3b6	8.267	560.346	117.147	3206.176	13.355
Ctrl MO C-C	Clone- Clone	h3b6	8.267	542.792	101.622	3005.74	13.355
Ctrl MO C-C	Clone- Clone	h3b6	8.267	636.048	80.118	2901.072	13.355
Ctrl MO C-C	Clone- Clone
Ctrl MO C-C	Clone- Clone	h3b7	10.969	534.94	35.706	2308.339	17.747
Ctrl MO C-C	Clone- Clone	h3b7	10.969	539.067	31.183	2211.804	17.747
Ctrl MO C-C	Clone- Clone	h3b7	10.969	501.059	16.725	3550.844	17.747
Ctrl MO C-C	Clone- Clone	h3b7	10.969	380.307	40.52	2875.463	17.747
Ctrl MO C-C	Clone- Clone	h3b7	10.969	227.54	15.358	1242.382	17.747
Ctrl MO C-C	Clone- Clone
Ctrl MO C-C	Clone- Clone	h3b8	6.97	428.427	61.078	1511.774	11.246
Ctrl MO C-C	Clone- Clone	h3b8	6.97	482.129	54.366	1650.172	11.246
Ctrl MO C-C	Clone- Clone	h3b8	6.97	453.77	59.567	2577.884	11.246
Ctrl MO C-C	Clone- Clone	h3b8	6.97	282.128	17.696	892.802	11.246
Ctrl MO C-C	Clone- Clone	h3b8	6.97	217.368	32.116	1143.125	11.246
Ctrl MO C-C	Clone- Clone
Ctrl MO C-C	Clone- Clone	h3b9	10.537	695.332	33.992	3708.162	17.045
Ctrl MO C-C	Clone- Clone	h3b9	10.537	499.135	100.633	1597.883	17.045
Ctrl MO C-C	Clone- Clone	h3b9	10.537	332.346	68.868	1460.902	17.045
Ctrl MO C-C	Clone- Clone	h3b9	10.537	333.139	31.746	1103.793	17.045
Ctrl MO C-C	Clone- Clone
Ctrl MO C-C	Clone- Clone	h3b10	11.347	494.924	55.693	2123.815	18.362
Ctrl MO C-C	Clone- Clone	h3b10	11.347	482.181	81.121	2117.887	18.362
Ctrl MO C-C	Clone- Clone	h3b10	11.347	367.809	66.163	1737.698	18.362
Ctrl MO C-C	Clone- Clone	h3b10	11.347	354.271	60.106	1261.074	18.362
Ctrl MO C-C	Clone- Clone
Ctrl MO C-C	Clone- Clone	h3b11	9.294	650.622	51.369	2063.831	15.024
Ctrl MO C-C	Clone- Clone	h3b11	9.294	643.254	60.119	3235.679	15.024
Ctrl MO C-C	Clone- Clone	h3b11	9.294	392.396	42.613	2183.78	15.024
Ctrl MO C-C	Clone- Clone	h3b11	9.294	276.757	36.97	791.141	15.024
Ctrl MO C-C	Clone- Clone
Ctrl MO C-C	Clone- Clone	h4b1	7.673	938.794	293.98	2008.578	12.388
Ctrl MO C-C	Clone- Clone	h4b1	7.673	767.79	242.11	2318.414	12.388
Ctrl MO C-C	Clone- Clone	h4b1	7.673	637.893	214.642	2782.691	12.388
Ctrl MO C-C	Clone- Clone	h4b1	7.673	573.244	112.096	3765.612	12.388
Ctrl MO C-C	Clone- Clone	h4b1	7.673	502.696	143.415	2388.525	12.388
Ctrl MO C-C	Clone- Clone	h4b1	7.673	439.091	121.197	1138.359	12.388
Ctrl MO C-C	Clone- Clone
Ctrl MO C-C	Clone- Clone	h4b2	10.375	863.807	249.285	4051.358	16.778
Ctrl MO C-C	Clone- Clone	h4b2	10.375	720.979	167.038	4022.388	16.778
Ctrl MO C-C	Clone- Clone	h4b2	10.375	599.75	114.768	3306.323	16.778
Ctrl MO C-C	Clone- Clone	h4b2	10.375	508.659	47.752	3704.105	16.778
Ctrl MO C-C	Clone- Clone	h4b2	10.375	408.434	27.761	1733.592	16.778
Ctrl MO C-C	Clone- Clone	h4b2	10.375	359.649	39.246	1281.174	16.778
Ctrl MO C-C	Clone- Clone
Ctrl MO C-C	Clone- Clone	h4b3	8.321	1319.843	364.524	3404.571	13.442
Ctrl MO C-C	Clone- Clone	h4b3	8.321	901.945	278.176	2739.667	13.442
Ctrl MO C-C	Clone- Clone	h4b3	8.321	736.255	211.274	1930.718	13.442
Ctrl MO C-C	Clone- Clone	h4b3	8.321	621.289	161.128	1868.943	13.442
Ctrl MO C-C	Clone- Clone	h4b3	8.321	570.14	108.145	2020.616	13.442
Ctrl MO C-C	Clone- Clone	h4b3	8.321	486.722	108.727	1896.574	13.442
Ctrl MO C-C	Clone- Clone	h4b3	8.321	430.593	101.368	1487.212	13.442
Ctrl MO C-C	Clone- Clone
Ctrl MO C-C	Clone- Clone	h4b4	9.078	1191.254	416.564	3612.023	14.672
Ctrl MO C-C	Clone- Clone	h4b4	9.078	1084.456	247.483	4038.974	14.672
Ctrl MO C-C	Clone- Clone	h4b4	9.078	988.754	155.232	3586.388	14.672
Ctrl MO C-C	Clone- Clone	h4b4	9.078	866.746	98.54	2711.711	14.672
Ctrl MO C-C	Clone- Clone	h4b4	9.078	716.203	123.658	1967.379	14.672
Ctrl MO C-C	Clone- Clone	h4b4	9.078	507.344	77.292	4056.518	14.672
Ctrl MO C-C	Clone- Clone	h4b4	9.078	469.879	102.253	3825.135	14.672
Ctrl MO C-C	Clone- Clone
Ctrl MO C-C	Clone- Clone	h4b5	5.079	572.465	110.656	1405.895	8.171
Ctrl MO C-C	Clone- Clone	h4b5	5.079	467.911	105.374	1488.821	8.171
Ctrl MO C-C	Clone- Clone	h4b5	5.079	403.928	78.083	1701.803	8.171
Ctrl MO C-C	Clone- Clone	h4b5	5.079	382.487	51.729	1331.116	8.171
Ctrl MO C-C	Clone- Clone	h4b5	5.079	358.719	21.752	1739.155	8.171
Ctrl MO C-C	Clone- Clone	h4b5	5.079	300.731	33.128	1330.876	8.171
Ctrl MO C-C	Clone- Clone	h4b5	5.079	278.656	14.68	1387.774	8.171
Ctrl MO C-C	Clone- Clone
Ctrl MO C-C	Clone- Clone	h4b6	10.699	957.957	255.51	3715.317	17.301
Ctrl MO C-C	Clone- Clone	h4b6	10.699	671.257	179.136	3620.26	17.301
Ctrl MO C-C	Clone- Clone	h4b6	10.699	581.688	102.216	4000.514	17.301
Ctrl MO C-C	Clone- Clone	h4b6	10.699	533.363	61.674	4092.449	17.301
Ctrl MO C-C	Clone- Clone	h4b6	10.699	432.094	55.007	3382.863	17.301
Ctrl MO C-C	Clone- Clone
Ctrl MO C-C	Clone- Clone	h4b7	8.267	909.369	294.626	1982.489	13.355
Ctrl MO C-C	Clone- Clone	h4b7	8.267	749.208	260.305	2206.435	13.355
Ctrl MO C-C	Clone- Clone	h4b7	8.267	616.362	166.845	2948.591	13.355
Ctrl MO C-C	Clone- Clone	h4b7	8.267	536.579	114.583	3672.625	13.355
Ctrl MO C-C	Clone- Clone	h4b7	8.267	468.085	137.869	1533.809	13.355
Ctrl MO C-C	Clone- Clone	h4b7	8.267	419.41	73.772	1112.281	13.355
Ctrl MO C-C	Clone- Clone
Ctrl MO C-C	Clone- Clone	h4b8	10.753	1317.369	262.466	4089.97	17.395
Ctrl MO C-C	Clone- Clone	h4b8	10.753	1206.621	195.277	3943.154	17.395
Ctrl MO C-C	Clone- Clone	h4b8	10.753	963.206	196.095	3211.992	17.395
Ctrl MO C-C	Clone- Clone	h4b8	10.753	504.421	138.279	1325.281	17.395
Ctrl MO C-C	Clone- Clone	h4b8	10.753	233.378	37.505	738.87	17.395
Ctrl MO C-C	Clone- Clone
Ctrl MO C-C	Clone- Clone	h4b9	8.321	950.917	215.603	2727.795	13.442
Ctrl MO C-C	Clone- Clone	h4b9	8.321	943.163	143.296	2899.93	13.442
Ctrl MO C-C	Clone- Clone	h4b9	8.321	702.646	129.329	2108.76	13.442
Ctrl MO C-C	Clone- Clone	h4b9	8.321	363.099	86.875	1065.899	13.442
Ctrl MO C-C	Clone- Clone	h4b9	8.321	200.094	43.319	867.11	13.442
Ctrl MO C-C	Clone- Clone	h4b9	8.321	170.815	15.64	570.677	13.442
Ctrl MO C-C	Clone- Clone
Ctrl MO C-C	Clone- Clone	h4b10	8.159	578.369	102.047	3212.842	13.179
Ctrl MO C-C	Clone- Clone	h4b10	8.159	451.438	77.206	4013.778	13.179
Ctrl MO C-C	Clone- Clone	h4b10	8.159	352.732	70.15	1986.301	13.179
Ctrl MO C-C	Clone- Clone	h4b10	8.159	352.993	52.74	1254.621	13.179
Ctrl MO C-C	Clone- Clone	h4b10	8.159	415.408	37.944	2888.469	13.179
Ctrl MO C-C	Clone- Clone
Ctrl MO C-C	Clone- Clone	h4b11	7.349	777.495	124.203	2693.265	11.861
Ctrl MO C-C	Clone- Clone	h4b11	7.349	634.908	199.517	1974.323	11.861
Ctrl MO C-C	Clone- Clone	h4b11	7.349	532.334	128.118	3361.059	11.861
Ctrl MO C-C	Clone- Clone	h4b11	7.349	446.981	77.67	3497.289	11.861
Ctrl MO C-C	Clone- Clone	h4b11	7.349	383.869	32.807	2212.887	11.861
Ctrl MO C-C	Clone- Clone
Ctrl MO C-C	Clone- Clone	h4b12	5.782	548.237	132.737	1749.732	9.313
Ctrl MO C-C	Clone- Clone	h4b12	5.782	459.653	121.158	2371.992	9.313
Ctrl MO C-C	Clone- Clone	h4b12	5.782	549.122	107.903	4077.655	9.313
Ctrl MO C-C	Clone- Clone	h4b12	5.782	564.041	130.883	3931.221	9.313
Ctrl MO N-C	Non Clone- Clone	h1b1	11.185	601.044	146.838	2175.524	18.036
Ctrl MO N-C	Non Clone- Clone	h1b1	11.185	376.854	85.346	1260.398	18.036
Ctrl MO N-C	Non Clone- Clone	h1b1	11.185	368.664	82.252	2606.531	18.036
Ctrl MO N-C	Non Clone- Clone	h1b1	11.185	400.637	69.587	4082.483	18.036
Ctrl MO N-C	Non Clone- Clone
Ctrl MO N-C	Non Clone- Clone	h1b2	9.24	467.126	63.364	1374.822	14.936
Ctrl MO N-C	Non Clone- Clone	h1b2	9.24	284.596	25.383	1789.923	14.936
Ctrl MO N-C	Non Clone- Clone	h1b2	9.24	246.298	17.597	1809.718	14.936
Ctrl MO N-C	Non Clone- Clone
Ctrl MO N-C	Non Clone- Clone	h1b3	8.862	567.891	67.666	2048.526	14.321
Ctrl MO N-C	Non Clone- Clone	h1b3	8.862	403.06	26.726	1359.32	14.321
Ctrl MO N-C	Non Clone- Clone	h1b3	8.862	228.765	20.327	895.121	14.321
Ctrl MO N-C	Non Clone- Clone	h1b3	8.862	187.283	20.195	793.856	14.321
Ctrl MO N-C	Non Clone- Clone
Ctrl MO N-C	Non Clone- Clone	h1b4	10.375	467.803	73.318	1940.13	16.781
Ctrl MO N-C	Non Clone- Clone	h1b4	10.375	324.486	34.058	1614.243	16.781
Ctrl MO N-C	Non Clone- Clone	h1b4	10.375	287.274	18.287	1304.252	16.781
Ctrl MO N-C	Non Clone- Clone	h1b4	10.375	287.049	6.893	1964.682	16.781
Ctrl MO N-C	Non Clone- Clone	h2b1	6.484	541.14	35.577	3348.284	10.455
Ctrl MO N-C	Non Clone- Clone	h2b1	6.484	522.777	27.855	3782.46	10.455
Ctrl MO N-C	Non Clone- Clone	h2b1	6.484	492.954	38.23	3087.292	10.455
Ctrl MO N-C	Non Clone- Clone	h2b1	6.484	429.644	37.594	1461.924	10.455
Ctrl MO N-C	Non Clone- Clone
Ctrl MO N-C	Non Clone- Clone	h2b2	7.349	696.29	134.59	3051.772	11.861
Ctrl MO N-C	Non Clone- Clone	h2b2	7.349	534.88	142.198	1934.492	11.861
Ctrl MO N-C	Non Clone- Clone	h2b2	7.349	395.938	79.975	1962.071	11.861
Ctrl MO N-C	Non Clone- Clone	h2b2	7.349	269.111	54.709	1057.104	11.861
Ctrl MO N-C	Non Clone- Clone
Ctrl MO N-C	Non Clone- Clone	h2b4	11.779	493.863	84.208	2329.051	19.065
Ctrl MO N-C	Non Clone- Clone	h2b4	11.779	454.335	98.044	1768.25	19.065
Ctrl MO N-C	Non Clone- Clone	h2b4	11.779	429.304	63.22	1510.469	19.065
Ctrl MO N-C	Non Clone- Clone	h2b4	11.779	405.55	57.777	2276.666	19.065
Ctrl MO N-C	Non Clone- Clone	h3b1	7.457	542.566	86.35	1809.27	12.037
Ctrl MO N-C	Non Clone- Clone	h3b1	7.457	482.965	86.204	1907.463	12.037
Ctrl MO N-C	Non Clone- Clone	h3b1	8.916	879.88	107.437	3147.015	14.409
Ctrl MO N-C	Non Clone- Clone	h3b1	8.916	488.694	95.904	1726.05	14.409
Ctrl MO N-C	Non Clone- Clone	h3b1	8.916	374.492	60.153	2018.46	14.409
Ctrl MO N-C	Non Clone- Clone
Ctrl MO N-C	Non Clone- Clone	h3b2	6.754	684.43	108.933	3434.294	10.894
Ctrl MO N-C	Non Clone- Clone	h3b2	6.754	644.384	80.067	2461.503	10.894
Ctrl MO N-C	Non Clone- Clone	h3b2	6.754	322.832	30.132	1131.441	10.894
Ctrl MO N-C	Non Clone- Clone	h3b2	6.754	200.632	31.768	712.719	10.894
Ctrl MO N-C	Non Clone- Clone
Ctrl MO N-C	Non Clone- Clone	h3b3	8.267	619.48	97.253	3729.111	13.355
Ctrl MO N-C	Non Clone- Clone	h3b3	8.267	509.643	109.785	3086.258	13.355
Ctrl MO N-C	Non Clone- Clone	h3b3	8.267	477.619	96.269	1916.225	13.355
Ctrl MO N-C	Non Clone- Clone	h3b3	8.267	498.141	44.014	2101.787	13.355
Ctrl MO N-C	Non Clone- Clone
Ctrl MO N-C	Non Clone- Clone	h3b4	11.617	751.085	126.045	3086.624	18.802
Ctrl MO N-C	Non Clone- Clone	h3b4	11.617	721.778	97.744	3398.76	18.802
Ctrl MO N-C	Non Clone- Clone	h3b4	11.617	580.965	60.524	3951.521	18.802
Ctrl MO N-C	Non Clone- Clone	h3b4	11.617	469.727	60.973	4047.44	18.802
Ctrl MO N-C	Non Clone- Clone
Ctrl MO N-C	Non Clone- Clone	h3b5	15.346	818.197	111.333	3840.394	24.864
Ctrl MO N-C	Non Clone- Clone	h3b5	15.346	602.99	112.966	2563.98	24.864
Ctrl MO N-C	Non Clone- Clone	h3b5	15.346	456.029	76.023	3977.226	24.864
Ctrl MO N-C	Non Clone- Clone
Ctrl MO N-C	Non Clone- Clone	h4b1	7.241	744.97	212.574	3759.783	11.685
Ctrl MO N-C	Non Clone- Clone	h4b1	7.241	544.831	78.812	2436.203	11.685
Ctrl MO N-C	Non Clone- Clone	h4b1	7.241	393.626	78.958	1832.34	11.685
Ctrl MO N-C	Non Clone- Clone	h4b1	7.241	356.713	91.292	1445.609	11.685
Ctrl MO N-C	Non Clone- Clone	h4b1	7.241	366.123	105.644	1426.41	11.685
Ctrl MO N-C	Non Clone- Clone
Ctrl MO N-C	Non Clone- Clone	h4b2	5.187	734.369	169.775	2895.54	8.347
Ctrl MO N-C	Non Clone- Clone	h4b2	5.187	449.314	51.982	1888.748	8.347
Ctrl MO N-C	Non Clone- Clone	h4b2	5.187	282.514	18.605	1726.177	8.347
Ctrl MO N-C	Non Clone- Clone
Ctrl MO N-C	Non Clone- Clone	h4b3	11.725	1077.38	140.271	4095	18.974
Ctrl MO N-C	Non Clone- Clone	h4b3	11.725	778.229	116.716	3180.397	18.974
Ctrl MO N-C	Non Clone- Clone	h4b3	11.725	426.431	81.71	1669.73	18.974
Ctrl MO N-C	Non Clone- Clone	h4b3	11.725	323.583	57.475	1043.273	18.974
Ctrl MO N-C	Non Clone- Clone	h4b3	11.725	234.302	28.42	765.131	18.974
Ctrl MO N-C	Non Clone- Clone	h4b3	11.725	173.288	18.702	837.669	18.974
Ctrl MO N-C	Non Clone- Clone
Ctrl MO N-C	Non Clone- Clone	h4b4	10.05	576.651	39.624	3112.829	16.254
Ctrl MO N-C	Non Clone- Clone	h4b4	10.05	369.594	22.526	1866.288	16.254
Ctrl MO N-C	Non Clone- Clone	h4b4	10.05	317.084	10.346	2010.06	16.254
Ctrl MO N-C	Non Clone- Clone	h4b4	10.05	274.815	25.328	1079.231	16.254
Ctrl MO N-C	Non Clone- Clone	h4b4	10.05	262.511	6.078	1518.332	16.254
Ctrl MO N-C	Non Clone- Clone
Ctrl MO N-C	Non Clone- Clone	h4b5	8.267	781.088	54.014	3746.88	13.354
Ctrl MO N-C	Non Clone- Clone	h4b5	8.267	737.195	24.481	2974.635	13.354
Ctrl MO N-C	Non Clone- Clone	h4b5	8.267	646.448	52.367	2943.037	13.354
Ctrl MO N-C	Non Clone- Clone	h4b5	8.267	527.16	45.18	2205.698	13.354
Ctrl MO N-C	Non Clone- Clone	h4b5	8.267	401.228	51.573	1474.024	13.354
Ctrl MO N-C	Non Clone- Clone	h4b5	8.267	330.274	26.679	1628.081	13.354
Ctrl MO N-C	Non Clone- Clone
Ctrl MO N-C	Non Clone- Clone	h4b6	11.131	1154.505	223.707	4095	18.011
Ctrl MO N-C	Non Clone- Clone	h4b6	11.131	859.978	174.009	3388.182	18.011
Ctrl MO N-C	Non Clone- Clone	h4b6	11.131	588.51	113.08	1699.65	18.011
Ctrl MO N-C	Non Clone- Clone	h4b6	11.131	484.352	76.095	1475.649	18.011
Ctrl MO N-C	Non Clone- Clone	h4b6	11.131	419.706	74.51	1358.616	18.011
Ctrl MO N-C	Non Clone- Clone
Ctrl MO N-C	Non Clone- Clone	h4b7	9.294	780.884	125.684	4095	15.021
Ctrl MO N-C	Non Clone- Clone	h4b7	9.294	824.224	84.834	3929.797	15.021
Ctrl MO N-C	Non Clone- Clone	h4b7	9.294	747.966	86.104	4077.052	15.021
Ctrl MO N-C	Non Clone- Clone	h4b7	9.294	597.309	84.531	3049.255	15.021
Ctrl MO N-C	Non Clone- Clone	h4b7	9.294	542.453	101.747	3897.752	15.021
Ctrl MO N-C	Non Clone- Clone
Ctrl MO N-N	Non Clone- Non Clone	h1b5	5.133	541.702	124.548	1468.042	8.259
Ctrl MO N-N	Non Clone- Non Clone	h1b5	5.133	286.893	57.76	1120.028	8.259
Ctrl MO N-N	Non Clone- Non Clone	h1b5	5.133	229.424	29.188	857.989	8.259
Ctrl MO N-N	Non Clone- Non Clone	h1b5	5.133	191.071	22.23	726.535	8.259
Ctrl MO N-N	Non Clone- Non Clone	h1b5	5.133	133.131	11.197	529.739	8.259
Ctrl MO N-N	Non Clone- Non Clone
Ctrl MO N-N	Non Clone- Non Clone	h1b6	9.186	578.729	153.716	1987.876	14.848
Ctrl MO N-N	Non Clone- Non Clone	h1b6	9.186	501.185	96.357	1946.546	14.848
Ctrl MO N-N	Non Clone- Non Clone	h1b6	9.186	427.68	77.919	1311.914	14.848
Ctrl MO N-N	Non Clone- Non Clone	h1b6	9.186	373.998	66.398	1393.625	14.848
Ctrl MO N-N	Non Clone- Non Clone	h1b6	9.186	358.416	73.358	1210.282	14.848
Ctrl MO N-N	Non Clone- Non Clone
Ctrl MO N-N	Non Clone- Non Clone	h1b7	8.591	628.177	136.129	1932.473	13.882
Ctrl MO N-N	Non Clone- Non Clone	h1b7	8.591	502.662	103.241	2000.934	13.882
Ctrl MO N-N	Non Clone- Non Clone	h1b7	8.591	457.014	107.745	4023.85	13.882
Ctrl MO N-N	Non Clone- Non Clone	h1b7	8.591	486.42	70.431	3972.039	13.882
Ctrl MO N-N	Non Clone- Non Clone	h1b7	8.591	447.65	73.843	3006.183	13.882
Ctrl MO N-N	Non Clone- Non Clone	h1b7	8.591	408.568	89.72	1467.849	13.882
Ctrl MO N-N	Non Clone- Non Clone	h2b1	11.563	681.734	100.433	3332.632	18.714
Ctrl MO N-N	Non Clone- Non Clone	h2b1	11.563	553.522	74.272	2707.219	18.714
Ctrl MO N-N	Non Clone- Non Clone	h2b1	11.563	479.045	49.195	2495.381	18.714
Ctrl MO N-N	Non Clone- Non Clone	h2b1	11.563	432.26	37.333	2291.732	18.714
Ctrl MO N-N	Non Clone- Non Clone	h2b1	11.563	375.753	30.751	1733.872	18.714
Ctrl MO N-N	Non Clone- Non Clone
Ctrl MO N-N	Non Clone- Non Clone	h2b2	12.86	565.552	39.002	2832.984	20.822
Ctrl MO N-N	Non Clone- Non Clone	h2b2	12.86	453.04	65.341	2671.955	20.822
Ctrl MO N-N	Non Clone- Non Clone	h2b2	12.86	359.095	37.205	1827.367	20.822
Ctrl MO N-N	Non Clone- Non Clone	h2b2	12.86	324.733	33.366	2553.858	20.822
Ctrl MO N-N	Non Clone- Non Clone	h2b2	12.86	335.885	36.743	2768.423	20.822
Ctrl MO N-N	Non Clone- Non Clone
Ctrl MO N-N	Non Clone- Non Clone	h2b3	14.481	544.882	17.387	3994.44	23.458
Ctrl MO N-N	Non Clone- Non Clone	h2b3	14.481	457.284	52.432	2106.221	23.458
Ctrl MO N-N	Non Clone- Non Clone	h2b3	14.481	371.993	36.973	1879.516	23.458
Ctrl MO N-N	Non Clone- Non Clone	h2b3	14.481	318.464	31.177	1768.222	23.458
Ctrl MO N-N	Non Clone- Non Clone	h2b3	14.481	289.182	12.257	1342.021	23.458
Ctrl MO N-N	Non Clone- Non Clone
Ctrl MO N-N	Non Clone- Non Clone	h2b4	9.834	624.786	120.374	2026.237	15.902
Ctrl MO N-N	Non Clone- Non Clone	h2b4	9.834	495.682	86.15	1877.125	15.902
Ctrl MO N-N	Non Clone- Non Clone	h2b4	9.834	418.063	85.745	2376.156	15.902
Ctrl MO N-N	Non Clone- Non Clone	h2b4	9.834	405.212	72.373	2259.537	15.902
Ctrl MO N-N	Non Clone- Non Clone	h2b4	9.834	406.857	92.731	1845.798	15.902
Ctrl MO N-N	Non Clone- Non Clone	h2b4	9.834	310.296	46.668	1375.613	15.902
Ctrl MO N-N	Non Clone- Non Clone
Ctrl MO N-N	Non Clone- Non Clone	h2b5	10.969	569.987	73.75	2179.497	17.747
Ctrl MO N-N	Non Clone- Non Clone	h2b5	10.969	583.888	93.044	3355.121	17.747
Ctrl MO N-N	Non Clone- Non Clone	h2b5	10.969	476.697	46.788	2327.656	17.747
Ctrl MO N-N	Non Clone- Non Clone	h2b5	10.969	368.234	32.326	1820.007	17.747
Ctrl MO N-N	Non Clone- Non Clone	h2b5	10.969	228.209	16.12	963.814	17.747
Ctrl MO N-N	Non Clone- Non Clone	h2b5	10.969	151.87	12.409	482.593	17.747
Ctrl MO N-N	Non Clone- Non Clone
Ctrl MO N-N	Non Clone- Non Clone	h2b6	6.376	383.212	57.622	2281.913	10.279
Ctrl MO N-N	Non Clone- Non Clone	h2b6	6.376	370.035	98.102	1340.863	10.279
Ctrl MO N-N	Non Clone- Non Clone	h2b6	6.376	383.623	89.163	1478.641	10.279
Ctrl MO N-N	Non Clone- Non Clone	h2b6	6.376	414.148	78.086	2013.102	10.279
Ctrl MO N-N	Non Clone- Non Clone	h3b1	11.131	562.685	62.078	3879.55	18.011
Ctrl MO N-N	Non Clone- Non Clone	h3b1	11.131	438.331	46.827	3266.498	18.011
Ctrl MO N-N	Non Clone- Non Clone	h3b1	11.131	265.32	27.012	1118.573	18.011
Ctrl MO N-N	Non Clone- Non Clone	h3b1	11.131	190.868	20.1	591.186	18.011
Ctrl MO N-N	Non Clone- Non Clone
Ctrl MO N-N	Non Clone- Non Clone	h3b2	9.672	501	51.102	2718.569	15.639
Ctrl MO N-N	Non Clone- Non Clone	h3b2	9.672	405.267	35.226	2255.485	15.639
Ctrl MO N-N	Non Clone- Non Clone	h3b2	9.672	326.818	16.232	2209.4	15.639
Ctrl MO N-N	Non Clone- Non Clone
Ctrl MO N-N	Non Clone- Non Clone	h3b3	13.184	556.756	127.158	3007.56	21.347
Ctrl MO N-N	Non Clone- Non Clone	h3b3	13.184	460.064	94.392	2368.83	21.347
Ctrl MO N-N	Non Clone- Non Clone	h3b3	13.184	423.913	77.393	2578.533	21.347
Ctrl MO N-N	Non Clone- Non Clone
Ctrl MO N-N	Non Clone- Non Clone	h3b4	6.754	425.356	73.037	1599.445	10.894
Ctrl MO N-N	Non Clone- Non Clone	h3b4	6.754	424.918	67.969	2045.341	10.894
Ctrl MO N-N	Non Clone- Non Clone	h3b4	6.754	381.325	19.142	1601.437	10.894
Ctrl MO N-N	Non Clone- Non Clone
Ctrl MO N-N	Non Clone- Non Clone	h3b5	9.78	604.831	93.793	2243.455	15.815
Ctrl MO N-N	Non Clone- Non Clone	h3b5	9.78	582.526	91.865	2476.876	15.815
Ctrl MO N-N	Non Clone- Non Clone	h3b5	9.78	555.623	88.667	2536.823	15.815
Ctrl MO N-N	Non Clone- Non Clone	h3b5	9.78	503.531	60.458	3225.453	15.815
Ctrl MO N-N	Non Clone- Non Clone
Ctrl MO N-N	Non Clone- Non Clone	h3b6	4.161	609.717	91.536	2440.718	6.677
Ctrl MO N-N	Non Clone- Non Clone	h3b6	4.161	569.324	139.143	2761.221	6.677
Ctrl MO N-N	Non Clone- Non Clone	h3b6	4.161	554.142	109.894	3804.503	6.677
Ctrl MO N-N	Non Clone- Non Clone	h3b6	4.161	554.724	58.984	3956.897	6.677
Ctrl MO N-N	Non Clone- Non Clone	h3b6	4.161	380.896	22.124	1290.439	6.677
Ctrl MO N-N	Non Clone- Non Clone
Ctrl MO N-N	Non Clone- Non Clone
Ctrl MO N-N	Non Clone- Non Clone
Ctrl MO N-N	Non Clone- Non Clone
Ctrl MO N-N	Non Clone- Non Clone
Ctrl MO N-N	Non Clone- Non Clone
Ctrl MO N-N	Non Clone- Non Clone
Ctrl MO N-N	Non Clone- Non Clone
Ctrl MO N-N	Non Clone- Non Clone
Ctrl MO N-N	Non Clone- Non Clone
Ctrl MO N-N	Non Clone- Non Clone
Ctrl MO N-N	Non Clone- Non Clone
Ctrl MO N-N	Non Clone- Non Clone
Ctrl MO N-N	Non Clone- Non Clone
Ctrl MO N-N	Non Clone- Non Clone
Ctrl MO N-N	Non Clone- Non Clone
Ctrl MO N-N	Non Clone- Non Clone
Ctrl MO N-N	Non Clone- Non Clone
Ctrl MO N-N	Non Clone- Non Clone
Ctrl MO N-N	Non Clone- Non Clone
Ctrl MO N-N	Non Clone- Non Clone
Ctrl MO N-N	Non Clone- Non Clone
Ctrl MO N-N	Non Clone- Non Clone
Ctrl MO N-N	Non Clone- Non Clone
Ctrl MO N-N	Non Clone- Non Clone	h4b1	11.725	662.783	129.802	2605.949	18.977
Ctrl MO N-N	Non Clone- Non Clone	h4b1	11.725	657.653	87.816	3563.023	18.977
Ctrl MO N-N	Non Clone- Non Clone	h4b1	11.725	657.767	100.833	3387.007	18.977
Ctrl MO N-N	Non Clone- Non Clone	h4b1	11.725	602.454	73.347	4095	18.977
Ctrl MO N-N	Non Clone- Non Clone	h4b1	11.725	495.901	51.864	4085.638	18.977
Ctrl MO N-N	Non Clone- Non Clone	h4b1	11.725	475.037	71.575	2383.676	18.977
Ctrl MO N-N	Non Clone- Non Clone
Ctrl MO N-N	Non Clone- Non Clone	h4b2	9.078	874.75	163.564	2932.688	14.672
Ctrl MO N-N	Non Clone- Non Clone	h4b2	9.078	728.055	139.331	2025.471	14.672
Ctrl MO N-N	Non Clone- Non Clone	h4b2	9.078	591.846	77.827	1714.499	14.672
Ctrl MO N-N	Non Clone- Non Clone	h4b2	9.078	497.156	74.563	1483.596	14.672
Ctrl MO N-N	Non Clone- Non Clone	h4b2	9.078	451.213	71.333	1671.898	14.672
Ctrl MO N-N	Non Clone- Non Clone
Ctrl MO N-N	Non Clone- Non Clone	h4b3	8.97	837.14	181.784	2963.562	14.497
Ctrl MO N-N	Non Clone- Non Clone	h4b3	8.97	792.785	217.328	3046.911	14.497
Ctrl MO N-N	Non Clone- Non Clone	h4b3	8.97	741.361	131.419	2023.484	14.497
Ctrl MO N-N	Non Clone- Non Clone	h4b3	8.97	674.373	163.535	2219.46	14.497
Ctrl MO N-N	Non Clone- Non Clone	h4b3	8.97	579.155	121.729	1885.949	14.497
Ctrl MO N-N	Non Clone- Non Clone	h4b3	8.97	447.868	90.858	2775.3	14.497
Ctrl MO N-N	Non Clone- Non Clone
Ctrl MO N-N	Non Clone- Non Clone	h4b4	10.861	564.923	86.856	2968.572	17.571
Ctrl MO N-N	Non Clone- Non Clone	h4b4	10.861	361.549	58.433	1553.55	17.571
Ctrl MO N-N	Non Clone- Non Clone	h4b4	10.861	313.948	32.882	1271.24	17.571
Ctrl MO N-N	Non Clone- Non Clone	h4b4	10.861	275.605	40.232	1184.934	17.571
Ctrl MO N-N	Non Clone- Non Clone	h4b4	10.861	244.121	44.686	774.024	17.571
Ctrl MO N-N	Non Clone- Non Clone
Ctrl MO N-N	Non Clone- Non Clone	h4b5	6.322	643.409	147.664	1932.562	10.192
Ctrl MO N-N	Non Clone- Non Clone	h4b5	6.322	603.303	180.11	2505.991	10.192
Ctrl MO N-N	Non Clone- Non Clone	h4b5	6.322	587.724	120.937	4021.594	10.192
Ctrl MO N-N	Non Clone- Non Clone	h4b5	6.322	487.657	70.122	2104.983	10.192
Ctrl MO N-N	Non Clone- Non Clone	h4b5	6.322	408.15	63.686	1762.721	10.192
Ctrl MO N-N	Non Clone- Non Clone	h4b5	6.322	347.908	54.163	1400.922	10.192
Ctrl MO N-N	Non Clone- Non Clone
Ctrl MO N-N	Non Clone- Non Clone	h4b6	6.484	727.36	113.553	3201.109	10.455
Ctrl MO N-N	Non Clone- Non Clone	h4b6	6.484	753.875	164.361	2743.76	10.455
Ctrl MO N-N	Non Clone- Non Clone	h4b6	6.484	591.061	129.874	2526.195	10.455
Ctrl MO N-N	Non Clone- Non Clone	h4b6	6.484	459.913	97.246	1481.415	10.455
Ctrl MO N-N	Non Clone- Non Clone	h4b6	6.484	376.142	84.798	1182.86	10.455
Ctrl MO N-N	Non Clone- Non Clone	h4b6	6.484	438.381	62.261	1658.905	10.455
Ctrl MO N-N	Non Clone- Non Clone	h4b6	6.484	467.358	59.547	2031.172	10.455
Ecad MO C-C	Clone- Clone	h1b1	12.482	1358.412	118.076	4081.19	20.208
Ecad MO C-C	Clone- Clone	h1b1	13.022	1290.65	258.452	4056.88	21.086
Ecad MO C-C	Clone- Clone	h1b1	13.022	1189.514	241.258	4020.13	21.086
Ecad MO C-C	Clone- Clone	h1b1	13.022	785.861	107.946	2547.764	21.086
Ecad MO C-C	Clone- Clone	h1b1	13.022	365.198	75.514	1019.227	21.086
Ecad MO C-C	Clone- Clone	h1b1	13.022	295.191	35.444	2276.458	21.086
Ecad MO C-C	Clone- Clone
Ecad MO C-C	Clone- Clone	h1b2	5.187	1801.375	489.411	4074.407	8.347
Ecad MO C-C	Clone- Clone	h1b2	5.187	1748.074	461.933	4043.356	8.347
Ecad MO C-C	Clone- Clone	h1b2	5.187	1194.126	358.899	3089.769	8.347
Ecad MO C-C	Clone- Clone	h1b2	5.187	532.189	166.24	1271.458	8.347
Ecad MO C-C	Clone- Clone	h1b2	5.187	286.862	38.557	751.467	8.347
Ecad MO C-C	Clone- Clone
Ecad MO C-C	Clone- Clone	h1b3	9.888	1264.96	130.385	3854.439	15.99
Ecad MO C-C	Clone- Clone	h1b3	9.888	987.319	221.907	3261.448	15.99
Ecad MO C-C	Clone- Clone	h1b3	9.888	629.179	118.518	2770.758	15.99
Ecad MO C-C	Clone- Clone	h1b3	9.888	495.494	101.642	2648.901	15.99
Ecad MO C-C	Clone- Clone
Ecad MO C-C	Clone- Clone	h1b4	13.4	1191.075	79.212	3924.205	21.701
Ecad MO C-C	Clone- Clone	h1b4	13.4	720.236	197.393	2737.167	21.701
Ecad MO C-C	Clone- Clone	h1b4	13.4	446.65	110.028	1645.592	21.701
Ecad MO C-C	Clone- Clone	h1b4	13.4	312.127	45.44	1044.832	21.701
Ecad MO C-C	Clone- Clone
Ecad MO C-C	Clone- Clone	h1b5	12.374	1186.357	257.181	3920.457	20.031
Ecad MO C-C	Clone- Clone	h1b5	12.374	1286.734	292.633	4095	20.031
Ecad MO C-C	Clone- Clone	h1b5	12.374	1177.786	184.021	3305.986	20.031
Ecad MO C-C	Clone- Clone	h1b5	12.374	860.342	116.812	3676.355	20.031
Ecad MO C-C	Clone- Clone	h1b5	12.374	507.422	71.926	1564.912	20.031
Ecad MO C-C	Clone- Clone	h1b5	12.374	380.662	40.305	2018.843	20.031
Ecad MO C-C	Clone- Clone	h1b5	12.374	341.955	27.139	1842.948	20.031
Ecad MO C-C	Clone- Clone	h1b5	12.374	330.558	12.836	2408.98	20.031
Ecad MO C-C	Clone- Clone
Ecad MO C-C	Clone- Clone	h1b6	8.754	1830.12	223.612	4055.81	14.145
Ecad MO C-C	Clone- Clone	h1b6	8.754	1761.401	239.031	4037.055	14.145
Ecad MO C-C	Clone- Clone	h1b6	8.754	1343.017	390.423	3676.906	14.145
Ecad MO C-C	Clone- Clone	h1b6	8.754	1001.306	187.274	2853.16	14.145
Ecad MO C-C	Clone- Clone	h1b6	8.754	530.801	143.39	2232.872	14.145
Ecad MO C-C	Clone- Clone	h1b6	8.754	395.128	113.404	2649.614	14.145
Ecad MO C-C	Clone- Clone
Ecad MO C-C	Clone- Clone	h1b7	8.321	1097.589	187.032	3405.897	13.442
Ecad MO C-C	Clone- Clone	h1b7	8.321	1029.841	240.903	3338.114	13.442
Ecad MO C-C	Clone- Clone	h1b7	8.321	599.081	170.852	1918.368	13.442
Ecad MO C-C	Clone- Clone	h1b7	8.321	362.217	102.911	831.198	13.442
Ecad MO C-C	Clone- Clone	h1b7	8.321	283.559	81.928	791.476	13.442
Ecad MO C-C	Clone- Clone
Ecad MO C-C	Clone- Clone	h1b8	10.158	1310.837	267.848	4030.691	16.427
Ecad MO C-C	Clone- Clone	h1b8	10.158	1165.653	224.684	3538.896	16.427
Ecad MO C-C	Clone- Clone	h1b8	10.158	952.024	156.996	3452.303	16.427
Ecad MO C-C	Clone- Clone	h1b8	10.158	721.084	173.194	4078.876	16.427
Ecad MO C-C	Clone- Clone	h1b8	10.158	512.259	70.907	2450.135	16.427
Ecad MO C-C	Clone- Clone	h1b8	10.158	433.564	71.974	2747.381	16.427
Ecad MO C-C	Clone- Clone	h1b8	10.158	405.672	53.939	3386.696	16.427
Ecad MO C-C	Clone- Clone
Ecad MO C-C	Clone- Clone	h1b9	10.321	1126.327	181.866	4095	16.693
Ecad MO C-C	Clone- Clone	h1b9	10.321	1406.286	135.417	4095	16.693
Ecad MO C-C	Clone- Clone	h1b9	10.321	1195.645	143.863	4078.81	16.693
Ecad MO C-C	Clone- Clone	h1b9	12.158	932.34	191.889	3866.598	19.608
Ecad MO C-C	Clone- Clone	h1b9	12.158	618.605	156.204	2187.127	19.608
Ecad MO C-C	Clone- Clone	h1b9	12.158	357.248	24.41	1476	19.608
Ecad MO C-C	Clone- Clone	h1b9	12.158	297.923	33.651	2097.651	19.608
Ecad MO C-C	Clone- Clone	h2b1	9.51	685.365	87.705	3860.382	15.375
Ecad MO C-C	Clone- Clone	h2b1	9.51	1017.054	101.424	4095	15.375
Ecad MO C-C	Clone- Clone	h2b1	9.51	1026.831	87.083	4095	15.375
Ecad MO C-C	Clone- Clone	h2b1	9.51	850.355	100.863	4095	15.375
Ecad MO C-C	Clone- Clone	h2b1	9.51	533.047	72.677	4069.917	15.375
Ecad MO C-C	Clone- Clone	h2b1	9.51	352.599	29.512	1989.888	15.375
Ecad MO C-C	Clone- Clone	h2b1	9.51	309.628	41.399	1407.277	15.375
Ecad MO C-C	Clone- Clone
Ecad MO C-C	Clone- Clone	h2b2	10.699	648.222	68.561	2700.106	17.308
Ecad MO C-C	Clone- Clone	h2b2	10.699	673.966	94.171	2733.417	17.308
Ecad MO C-C	Clone- Clone	h2b2	10.699	495.697	74.183	2434.015	17.308
Ecad MO C-C	Clone- Clone	h2b2	10.699	325.151	70.282	1552.941	17.308
Ecad MO C-C	Clone- Clone	h2b2	10.699	287.513	31.902	1684.109	17.308
Ecad MO C-C	Clone- Clone	h2b2	10.699	245.008	8.191	1133.026	17.308
Ecad MO C-C	Clone- Clone
Ecad MO C-C	Clone- Clone	h2b3	10.429	610.284	55.812	3042.479	16.867
Ecad MO C-C	Clone- Clone	h2b3	10.429	702.089	57.561	3963.711	16.867
Ecad MO C-C	Clone- Clone	h2b3	10.429	411.736	79.241	3025.207	16.867
Ecad MO C-C	Clone- Clone	h2b3	10.429	327.753	72.823	1279.131	16.867
Ecad MO C-C	Clone- Clone	h2b3	10.429	265.734	48.205	1379.021	16.867
Ecad MO C-C	Clone- Clone	h2b3	10.429	238.898	19.193	1661.571	16.867
Ecad MO C-C	Clone- Clone
Ecad MO C-C	Clone- Clone	h2b4	10.158	686.689	111.565	2901.819	16.429
Ecad MO C-C	Clone- Clone	h2b4	10.158	638.348	49.353	2934.906	16.429
Ecad MO C-C	Clone- Clone	h2b4	10.158	545.828	48.742	2040.719	16.429
Ecad MO C-C	Clone- Clone	h2b4	10.158	378.506	29.933	1392.088	16.429
Ecad MO C-C	Clone- Clone	h2b4	10.158	240.014	32.648	829.052	16.429
Ecad MO C-C	Clone- Clone	h2b4	10.158	194.07	14.309	910.933	16.429
Ecad MO C-C	Clone- Clone
Ecad MO C-C	Clone- Clone	h2b5	16.048	817.81	86.116	3966.367	26.006
Ecad MO C-C	Clone- Clone	h2b5	16.048	730.787	105.648	3625.181	26.006
Ecad MO C-C	Clone- Clone	h2b5	16.048	581.238	105.14	2495.031	26.006
Ecad MO C-C	Clone- Clone	h2b5	16.048	418.202	83.889	2332.296	26.006
Ecad MO C-C	Clone- Clone	h2b5	16.048	312.376	45.244	1628.899	26.006
Ecad MO C-C	Clone- Clone	h2b5	16.048	286.458	30.677	1288.013	26.006
Ecad MO C-C	Clone- Clone	h2b5	16.048	258.414	10.432	1808.603	26.006
Ecad MO C-C	Clone- Clone	h2b5	16.048	235.269	1.723	1579.5	26.006
Ecad MO C-C	Clone- Clone
Ecad MO C-C	Clone- Clone	h2b6	14.643	820.113	105.131	3945.928	23.721
Ecad MO C-C	Clone- Clone	h2b6	14.643	635.337	63.853	3766.824	23.721
Ecad MO C-C	Clone- Clone	h2b6	14.643	539.734	70.096	2063.057	23.721
Ecad MO C-C	Clone- Clone	h2b6	14.643	430.861	44.738	2528.489	23.721
Ecad MO C-C	Clone- Clone	h2b6	14.643	331.883	26.317	1784.173	23.721
Ecad MO C-C	Clone- Clone	h2b6	14.643	243.966	11.601	1348.438	23.721
Ecad MO C-C	Clone- Clone	h2b6	14.643	239.373	3.465	2172.294	23.721
Ecad MO C-C	Clone- Clone
Ecad MO C-C	Clone- Clone	h2b7	8.267	568.101	83.73	3738.779	13.35
Ecad MO C-C	Clone- Clone	h2b7	8.267	549.806	67.253	3965.118	13.35
Ecad MO C-C	Clone- Clone	h2b7	8.267	504.5	44.868	3070.306	13.35
Ecad MO C-C	Clone- Clone	h2b7	8.267	419.731	36.245	1930.704	13.35
Ecad MO C-C	Clone- Clone	h2b7	8.267	348.573	34.935	1576.03	13.35
Ecad MO C-C	Clone- Clone	h2b7	8.267	317.52	68.465	1442.909	13.35
Ecad MO C-C	Clone- Clone
Ecad MO C-C	Clone- Clone	h2b8	12.158	997.94	146.724	3829.186	19.68
Ecad MO C-C	Clone- Clone	h2b8	12.158	969.946	150.632	4093.916	19.68
Ecad MO C-C	Clone- Clone	h2b8	12.158	907.169	143.6	4073.574	19.68
Ecad MO C-C	Clone- Clone	h2b8	12.158	760.261	57.759	3589.403	19.68
Ecad MO C-C	Clone- Clone	h2b8	12.158	557.489	93.787	1786.625	19.68
Ecad MO C-C	Clone- Clone	h2b8	12.158	473.432	88.902	1713.461	19.68
Ecad MO C-C	Clone- Clone	h2b8	12.158	388.368	80.771	2058.661	19.68
Ecad MO C-C	Clone- Clone	h2b8	12.158	325.745	74.584	1541.943	19.68
Ecad MO C-C	Clone- Clone
Ecad MO C-C	Clone- Clone	h2b9	7.457	919.278	76.731	3700.255	12.037
Ecad MO C-C	Clone- Clone	h2b9	7.457	959.385	122.617	4095	12.037
Ecad MO C-C	Clone- Clone	h2b9	7.457	598.046	135.65	4034.335	12.037
Ecad MO C-C	Clone- Clone	h2b9	7.457	512.227	84.261	4058.09	12.037
Ecad MO C-C	Clone- Clone	h2b9	7.457	427.557	73.483	3919.003	12.037
Ecad MO C-C	Clone- Clone
Ecad MO C-C	Clone- Clone	h2b10	8.591	662.929	125.289	4095	13.882
Ecad MO C-C	Clone- Clone	h2b10	8.591	693.72	64.683	3755.234	13.882
Ecad MO C-C	Clone- Clone	h2b10	8.591	481.458	97.832	1559.211	13.882
Ecad MO C-C	Clone- Clone	h2b10	8.591	406.06	63.261	1304.142	13.882
Ecad MO C-C	Clone- Clone	h2b10	8.591	333.416	47.146	1500.964	13.882
Ecad MO C-C	Clone- Clone
Ecad MO C-C	Clone- Clone	h2b11	14.535	951.732	139.295	3961.416	23.545
Ecad MO C-C	Clone- Clone	h2b11	14.535	737.625	69.739	4077.93	23.545
Ecad MO C-C	Clone- Clone	h2b11	14.535	423.825	66.681	2001.747	23.545
Ecad MO C-C	Clone- Clone	h2b11	14.535	369.215	49.501	1710.788	23.545
Ecad MO C-C	Clone- Clone	h2b11	14.535	344.442	38.072	1665.053	23.545
Ecad MO C-C	Clone- Clone
Ecad MO C-C	Clone- Clone	h2b12	12.32	1104.225	87.253	4095	19.944
Ecad MO C-C	Clone- Clone	h2b12	12.32	997.371	86.909	4095	19.944
Ecad MO C-C	Clone- Clone	h2b12	12.32	827.828	84.167	4095	19.944
Ecad MO C-C	Clone- Clone	h2b12	12.32	575.085	19.745	4095	19.944
Ecad MO C-C	Clone- Clone	h2b12	12.32	333.438	33.173	1898.243	19.944
Ecad MO C-C	Clone- Clone
Ecad MO C-C	Clone- Clone	h2b13	7.727	669.731	70.509	2800.99	12.461
Ecad MO C-C	Clone- Clone	h2b13	7.727	462.863	80.144	2518.497	12.461
Ecad MO C-C	Clone- Clone	h2b13	7.727	396.813	50.508	1701.399	12.461
Ecad MO C-C	Clone- Clone	h2b13	7.727	306.753	47.458	1037.496	12.461
Ecad MO C-C	Clone- Clone	h2b13	7.727	228.93	58.448	863.957	12.461
Ecad MO C-C	Clone- Clone	h2b13	7.727	194.847	22.995	1440.643	12.461
Ecad MO C-C	Clone- Clone
Ecad MO C-C	Clone- Clone	h2b14	5.944	746.13	92.555	2363.334	9.577
Ecad MO C-C	Clone- Clone	h2b14	5.944	661.186	98.865	2526.908	9.577
Ecad MO C-C	Clone- Clone	h2b14	5.944	562.242	116.087	2394.766	9.577
Ecad MO C-C	Clone- Clone	h2b14	5.944	467.734	96.786	1712.256	9.577
Ecad MO C-C	Clone- Clone	h2b14	5.944	327.768	48.061	1440.179	9.577
Ecad MO C-C	Clone- Clone	h2b14	5.944	307.512	58.984	2044.042	9.577
Ecad MO C-C	Clone- Clone	h3b1	5.836	1250.554	82.804	4083.579	9.401
Ecad MO C-C	Clone- Clone	h3b1	5.836	917.545	113.376	3365.697	9.401
Ecad MO C-C	Clone- Clone	h3b1	5.836	592.716	65.196	2127.303	9.401
Ecad MO C-C	Clone- Clone	h3b1	5.836	408.628	60.01	2284.719	9.401
Ecad MO C-C	Clone- Clone	h3b1	5.836	344.208	20.36	1217.579	9.401
Ecad MO C-C	Clone- Clone
Ecad MO C-C	Clone- Clone	h3b2	10.266	870.196	186.977	3771.951	16.599
Ecad MO C-C	Clone- Clone	h3b2	10.266	738.718	185.361	3479.568	16.599
Ecad MO C-C	Clone- Clone	h3b2	10.266	508.8	93.831	1762.5	16.599
Ecad MO C-C	Clone- Clone	h3b2	10.266	377.8	79.566	1651.39	16.599
Ecad MO C-C	Clone- Clone	h3b2	10.266	309.174	65.615	1959.184	16.599
Ecad MO C-C	Clone- Clone
Ecad MO C-C	Clone- Clone	h3b3	9.78	982.137	160.105	3927.422	15.815
Ecad MO C-C	Clone- Clone	h3b3	9.78	1019.954	70.849	3524.799	15.815
Ecad MO C-C	Clone- Clone	h3b3	9.78	938.672	108.373	3955.583	15.815
Ecad MO C-C	Clone- Clone	h3b3	9.78	626.39	101.056	3488.333	15.815
Ecad MO C-C	Clone- Clone	h3b3	9.78	432.132	35.401	1894.484	15.815
Ecad MO C-C	Clone- Clone	h3b3	9.78	342.201	27.236	1806.542	15.815
Ecad MO C-C	Clone- Clone
Ecad MO C-C	Clone- Clone	h3b4	10.807	1036.132	141.186	4095	17.484
Ecad MO C-C	Clone- Clone	h3b4	10.807	1112.881	100.21	3958.612	17.484
Ecad MO C-C	Clone- Clone	h3b4	10.807	979.305	88.639	4084.758	17.484
Ecad MO C-C	Clone- Clone	h3b4	10.807	673.491	55.971	4077.835	17.484
Ecad MO C-C	Clone- Clone	h3b4	10.807	407.198	38.087	3370.024	17.484
Ecad MO C-C	Clone- Clone	h3b4	10.807	353.129	29.911	4095	17.484
Ecad MO C-C	Clone- Clone
Ecad MO C-C	Clone- Clone	h3b5	10.645	951.497	124.27	3448.862	17.22
Ecad MO C-C	Clone- Clone	h3b5	10.645	842.441	186.915	3202.211	17.22
Ecad MO C-C	Clone- Clone	h3b5	10.645	728.01	129.772	3101.537	17.22
Ecad MO C-C	Clone- Clone	h3b5	10.645	610.782	94.524	2933.859	17.22
Ecad MO C-C	Clone- Clone	h3b5	10.645	454.328	78.965	2713.419	17.22
Ecad MO C-C	Clone- Clone	h3b5	10.645	277.117	44.977	1317.89	17.22
Ecad MO C-C	Clone- Clone
Ecad MO C-C	Clone- Clone	h3b6	7.187	918.122	137.641	3811.171	11.597
Ecad MO C-C	Clone- Clone	h3b6	7.187	604.146	86.603	2657.05	11.597
Ecad MO C-C	Clone- Clone	h3b6	7.187	464.796	82.591	3050.345	11.597
Ecad MO C-C	Clone- Clone	h3b6	3.728	831.465	131.929	3667.177	5.974
Ecad MO C-C	Clone- Clone	h3b6	3.728	647.625	135.298	2252.368	5.974
Ecad MO C-C	Clone- Clone	h3b6	3.728	384.522	85.016	1535.223	5.974
Ecad MO C-C	Clone- Clone	h3b6	3.728	276.667	33.173	2505.845	5.974
Ecad MO C-C	Clone- Clone
Ecad MO C-C	Clone- Clone	h3b7	9.294	925.6	99.066	4095	15.024
Ecad MO C-C	Clone- Clone	h3b7	9.294	1170.936	178.536	4095	15.024
Ecad MO C-C	Clone- Clone	h3b7	9.294	962.599	240.635	3894.136	15.024
Ecad MO C-C	Clone- Clone	h3b7	9.294	745.357	158.358	3012.926	15.024
Ecad MO C-C	Clone- Clone	h3b7	9.294	585.807	122.51	1875.222	15.024
Ecad MO C-C	Clone- Clone	h3b7	9.294	405.081	69.319	2644.18	15.024
Ecad MO C-C	Clone- Clone	h3b7	9.294	315.152	53.605	3937.488	15.024
Ecad MO C-C	Clone- Clone	h4b1	7.835	957.885	184.735	4095	12.642
Ecad MO C-C	Clone- Clone	h4b1	7.835	668.088	61.477	3887.009	12.642
Ecad MO C-C	Clone- Clone	h4b1	7.835	543.626	75.34	3042.389	12.642
Ecad MO C-C	Clone- Clone	h4b1	7.835	444.812	64.02	1999.226	12.642
Ecad MO C-C	Clone- Clone	h4b1	7.835	392.143	54.089	1882.301	12.642
Ecad MO C-C	Clone- Clone	h4b1	7.835	377.668	26.259	1752.567	12.642
Ecad MO C-C	Clone- Clone
Ecad MO C-C	Clone- Clone	h4b2	6.322	909.826	94.743	3468.937	10.192
Ecad MO C-C	Clone- Clone	h4b2	6.322	958.137	223.922	3146.645	10.192
Ecad MO C-C	Clone- Clone	h4b2	6.322	889.938	269.51	2551.272	10.192
Ecad MO C-C	Clone- Clone	h4b2	6.322	746.819	174.11	1832.627	10.192
Ecad MO C-C	Clone- Clone	h4b2	6.322	561.227	163.406	2093.123	10.192
Ecad MO C-C	Clone- Clone	h4b2	6.322	500.463	114.179	1873.692	10.192
Ecad MO C-C	Clone- Clone
Ecad MO C-C	Clone- Clone	h4b3	9.78	1085.561	158.504	4008.02	15.815
Ecad MO C-C	Clone- Clone	h4b3	9.78	721.999	99.309	3542.519	15.815
Ecad MO C-C	Clone- Clone	h4b3	9.78	479.824	72.8	1856.137	15.815
Ecad MO C-C	Clone- Clone	h4b3	9.78	334.309	59.845	1504.018	15.815
Ecad MO C-C	Clone- Clone	h4b3	9.78	212.128	24.002	999.354	15.815
Ecad MO C-C	Clone- Clone
Ecad MO C-C	Clone- Clone	h4b4	7.349	703.075	116.604	1996.282	11.86
Ecad MO C-C	Clone- Clone	h4b4	7.349	516.899	47.085	1703.854	11.86
Ecad MO C-C	Clone- Clone	h4b4	7.349	417.964	56.927	1741.392	11.86
Ecad MO C-C	Clone- Clone	h4b4	7.349	316.536	40.751	1365.271	11.86
Ecad MO C-C	Clone- Clone	h4b4	7.349	244.079	20.175	1112.728	11.86
Ecad MO C-C	Clone- Clone	h4b4	7.349	266.877	47.916	2162.094	11.86
Ecad MO C-C	Clone- Clone
Ecad MO C-C	Clone- Clone	h4b5	7.565	979.828	186.996	4057.225	12.212
Ecad MO C-C	Clone- Clone	h4b5	7.565	619.995	83.801	3912.065	12.212
Ecad MO C-C	Clone- Clone	h4b5	7.565	325.853	54.913	2000.512	12.212
Ecad MO C-C	Clone- Clone	h4b5	7.565	265.585	32.847	1490.147	12.212
Ecad MO C-C	Clone- Clone	h4b5	7.565	223.849	31.788	1185.163	12.212
Ecad MO C-C	Clone- Clone
Ecad MO C-C	Clone- Clone	h4b6	9.672	1148.112	270.769	3404.766	15.639
Ecad MO C-C	Clone- Clone	h4b6	9.672	837.955	136.212	3010.815	15.639
Ecad MO C-C	Clone- Clone	h4b6	9.672	422.72	78.548	1534.439	15.639
Ecad MO C-C	Clone- Clone	h4b6	9.672	302.067	44.355	1143.614	15.639
Ecad MO C-C	Clone- Clone	h4b6	9.672	230.822	32.596	956.85	15.639
Ecad MO C-C	Clone- Clone	h4b6	9.672	169.689	15.163	582.211	15.639
Ecad MO C-C	Clone- Clone	h4b6	9.672	126.294	7.372	576.614	15.639
Ecad MO C-C	Clone- Clone
Ecad MO C-C	Clone- Clone	h4b7	7.133	1252.259	340.112	3904.673	11.509
Ecad MO C-C	Clone- Clone	h4b7	7.133	987.313	121.327	3072.292	11.509
Ecad MO C-C	Clone- Clone	h4b7	7.133	788.786	112.517	2879.524	11.509
Ecad MO C-C	Clone- Clone	h4b7	7.133	575.044	93.871	2901.585	11.509
Ecad MO C-C	Clone- Clone	h4b7	7.133	378.083	52.344	2819.023	11.509
Ecad MO C-C	Clone- Clone	h4b7	7.133	203.084	18.71	738.791	11.509
Ecad MO N-C	Non Clone- Clone	h1b1	9.132	1492.784	197.526	4095	14.76
Ecad MO N-C	Non Clone- Clone	h1b1	9.132	1022.723	167.208	4057.671	14.76
Ecad MO N-C	Non Clone- Clone	h1b1	9.132	547.937	65.14	1888.836	14.76
Ecad MO N-C	Non Clone- Clone	h1b1	9.132	401.713	63.762	1332.395	14.76
Ecad MO N-C	Non Clone- Clone	h1b1	9.132	272.468	55.533	1242.908	14.76
Ecad MO N-C	Non Clone- Clone	h1b1	9.132	230.406	48.818	1277.992	14.76
Ecad MO N-C	Non Clone- Clone
Ecad MO N-C	Non Clone- Clone	h1b2	7.024	902.144	198.049	3525.291	11.334
Ecad MO N-C	Non Clone- Clone	h1b2	7.024	1020.717	240.212	3113.297	11.334
Ecad MO N-C	Non Clone- Clone	h1b2	7.024	1065.794	320.758	3660.939	11.334
Ecad MO N-C	Non Clone- Clone	h1b2	7.024	894.561	190.274	2901.054	11.334
Ecad MO N-C	Non Clone- Clone	h1b2	7.024	528.608	135.471	1957.405	11.334
Ecad MO N-C	Non Clone- Clone	h1b2	7.024	448.162	69.685	2871.793	11.334
Ecad MO N-C	Non Clone- Clone	h1b2	7.024	412.732	55.732	1980.709	11.334
Ecad MO N-C	Non Clone- Clone
Ecad MO N-C	Non Clone- Clone	h1b3	5.349	696.092	126.98	1855.958	8.61
Ecad MO N-C	Non Clone- Clone	h1b3	5.349	405.438	91.33	1359.32	8.61
Ecad MO N-C	Non Clone- Clone	h1b3	5.349	251.946	46.112	1603.837	8.61
Ecad MO N-C	Non Clone- Clone	h1b3	5.349	152.897	18.193	828.376	8.61
Ecad MO N-C	Non Clone- Clone	h1b3	5.349	93.356	10.843	957.851	8.61
Ecad MO N-C	Non Clone- Clone
Ecad MO N-C	Non Clone- Clone	h2b1	4.377	661.958	146.755	1937.858	7.029
Ecad MO N-C	Non Clone- Clone	h2b1	4.377	484.699	120.018	1195.245	7.029
Ecad MO N-C	Non Clone- Clone	h2b1	4.377	308.922	56.974	1047.59	7.029
Ecad MO N-C	Non Clone- Clone	h2b1	4.377	213.73	44.663	1950.114	7.029
Ecad MO N-C	Non Clone- Clone
Ecad MO N-C	Non Clone- Clone	h2b2	10.05	784.638	160.219	2683.52	16.254
Ecad MO N-C	Non Clone- Clone	h2b2	10.05	672.286	125.748	3150.984	16.254
Ecad MO N-C	Non Clone- Clone	h2b2	10.05	552.795	114.419	2168.582	16.254
Ecad MO N-C	Non Clone- Clone	h2b2	10.05	405.664	78.905	2201.622	16.254
Ecad MO N-C	Non Clone- Clone	h2b2	10.05	337.514	45.893	1901.322	16.254
Ecad MO N-C	Non Clone- Clone
Ecad MO N-C	Non Clone- Clone	h2b3	12.104	896.855	130.434	3412.225	19.593
Ecad MO N-C	Non Clone- Clone	h2b3	12.104	778.66	140.493	2749.42	19.593
Ecad MO N-C	Non Clone- Clone	h2b3	12.104	627.16	89.893	3010.178	19.593
Ecad MO N-C	Non Clone- Clone	h2b3	12.104	455.454	87.793	2035.707	19.593
Ecad MO N-C	Non Clone- Clone	h2b3	12.104	314.443	62.474	1500.607	19.593
Ecad MO N-C	Non Clone- Clone	h2b3	12.104	279.207	37.354	1645.779	19.593
Ecad MO N-C	Non Clone- Clone
Ecad MO N-C	Non Clone- Clone	h2b4	7.943	553.329	97.579	1466.587	12.827
Ecad MO N-C	Non Clone- Clone	h2b4	7.943	438.179	67.525	1251.029	12.827
Ecad MO N-C	Non Clone- Clone	h2b4	7.943	346.979	39.928	2278.068	12.827
Ecad MO N-C	Non Clone- Clone	h2b4	7.943	359.034	59.71	2237.575	12.827
Ecad MO N-C	Non Clone- Clone
Ecad MO N-C	Non Clone- Clone	h2b5	5.728	1079.701	158.009	4075.578	9.225
Ecad MO N-C	Non Clone- Clone	h2b5	5.728	970.075	167.159	2925.171	9.225
Ecad MO N-C	Non Clone- Clone	h2b5	5.728	491.712	73.543	1153.839	9.225
Ecad MO N-C	Non Clone- Clone	h2b5	5.728	352.793	44.797	898.223	9.225
Ecad MO N-C	Non Clone- Clone	h2b5	5.728	238.935	20.656	906.365	9.225
Ecad MO N-C	Non Clone- Clone	h2b5	5.728	196.417	27.355	1125.787	9.225
Ecad MO N-C	Non Clone- Clone
Ecad MO N-C	Non Clone- Clone	h2b6	7.565	801.038	131.741	2897.122	12.212
Ecad MO N-C	Non Clone- Clone	h2b6	7.565	685.994	98.624	2376.191	12.212
Ecad MO N-C	Non Clone- Clone	h2b6	7.565	497.369	95.825	3578.793	12.212
Ecad MO N-C	Non Clone- Clone	h2b6	7.565	347.98	85.434	1354.226	12.212
Ecad MO N-C	Non Clone- Clone	h2b6	7.565	317.511	26.12	1041.2	12.212
Ecad MO N-C	Non Clone- Clone
Ecad MO N-C	Non Clone- Clone
Ecad MO N-C	Non Clone- Clone
Ecad MO N-C	Non Clone- Clone
Ecad MO N-C	Non Clone- Clone	h3b1	9.888	1096.894	175.508	3365.735	15.99
Ecad MO N-C	Non Clone- Clone	h3b1	9.888	827.079	161.068	3970.95	15.99
Ecad MO N-C	Non Clone- Clone	h3b1	9.888	535.038	80.067	2615.877	15.99
Ecad MO N-C	Non Clone- Clone	h4b1	9.24	1078.353	286.914	3563.429	14.935
Ecad MO N-C	Non Clone- Clone	h4b1	9.24	552.881	120.13	1935.356	14.935
Ecad MO N-C	Non Clone- Clone	h4b1	9.24	389.877	95.637	1645.308	14.935
Ecad MO N-C	Non Clone- Clone	h4b1	9.24	300.379	69.612	1573.458	14.935
Ecad MO N-C	Non Clone- Clone	h4b1	9.24	257.736	55.3	885.887	14.935
Ecad MO N-C	Non Clone- Clone	h4b1	9.24	261.537	17.301	1293.108	14.935
Ecad MO N-C	Non Clone- Clone
Ecad MO N-C	Non Clone- Clone	h4b2	8.321	1071.672	208.012	3758.613	13.442
Ecad MO N-C	Non Clone- Clone	h4b2	8.321	876.047	173.059	2842.125	13.442
Ecad MO N-C	Non Clone- Clone	h4b2	8.321	603.611	135.021	2611.623	13.442
Ecad MO N-C	Non Clone- Clone	h4b2	8.321	478.71	95.22	1494.261	13.442
Ecad MO N-C	Non Clone- Clone	h4b2	8.321	456.508	50.812	1690.28	13.442
Ecad MO N-C	Non Clone- Clone	h4b2	8.321	429.489	43.741	1573.111	13.442
Ecad MO N-C	Non Clone- Clone
Ecad MO N-N	Non Clone- Non Clone	h1b1	5.998	1833.991	490.986	4065.927	9.664
Ecad MO N-N	Non Clone- Non Clone	h1b1	5.998	1332.01	310.657	4095	9.664
Ecad MO N-N	Non Clone- Non Clone	h1b1	5.998	625.693	134.124	2966.487	9.664
Ecad MO N-N	Non Clone- Non Clone	h1b1	5.998	294.797	44.45	882.235	9.664
Ecad MO N-N	Non Clone- Non Clone	h1b1	5.998	261.607	37.573	998.054	9.664
Ecad MO N-N	Non Clone- Non Clone	h1b1	5.998	269.048	18.555	1339.207	9.664
Ecad MO N-N	Non Clone- Non Clone
Ecad MO N-N	Non Clone- Non Clone	h1b2	5.025	755.074	67.594	1948.428	8.083
Ecad MO N-N	Non Clone- Non Clone	h1b2	5.025	420.79	53.221	1313.392	8.083
Ecad MO N-N	Non Clone- Non Clone	h1b2	5.025	223.243	45.969	776.375	8.083
Ecad MO N-N	Non Clone- Non Clone	h1b2	5.025	117.761	13.472	413.316	8.083
Ecad MO N-N	Non Clone- Non Clone	h1b2	5.025	77.121	4.265	303.386	8.083
Ecad MO N-N	Non Clone- Non Clone	h1b2	5.025	58.867	0.75	288.623	8.083
Ecad MO N-N	Non Clone- Non Clone
Ecad MO N-N	Non Clone- Non Clone	h1b3	8.591	1136.591	294.303	3306.6	13.882
Ecad MO N-N	Non Clone- Non Clone	h1b3	8.591	903.157	223.855	2594.643	13.882
Ecad MO N-N	Non Clone- Non Clone	h1b3	8.591	534.243	139.611	1715.034	13.882
Ecad MO N-N	Non Clone- Non Clone	h1b3	8.591	239.72	46.894	1088.822	13.882
Ecad MO N-N	Non Clone- Non Clone	h1b3	8.591	173.636	22.294	1210.275	13.882
Ecad MO N-N	Non Clone- Non Clone	h1b3	8.591	142.644	8.309	942.277	13.882
Ecad MO N-N	Non Clone- Non Clone
Ecad MO N-N	Non Clone- Non Clone	h1b4	7.133	1302.664	195.019	4089	11.507
Ecad MO N-N	Non Clone- Non Clone	h1b4	7.133	1237.07	261.202	3841.266	11.507
Ecad MO N-N	Non Clone- Non Clone	h1b4	7.133	890.543	228.429	3149.004	11.507
Ecad MO N-N	Non Clone- Non Clone	h1b4	7.133	526.096	131.783	2272.224	11.507
Ecad MO N-N	Non Clone- Non Clone	h1b4	7.133	316.764	73.143	1113.407	11.507
Ecad MO N-N	Non Clone- Non Clone	h1b4	7.133	207.754	19.883	770.186	11.507
Ecad MO N-N	Non Clone- Non Clone
Ecad MO N-N	Non Clone- Non Clone	h1b5	9.942	927.315	84.871	3999.935	16.078
Ecad MO N-N	Non Clone- Non Clone	h1b5	9.942	696.242	107.547	3107.918	16.078
Ecad MO N-N	Non Clone- Non Clone	h1b5	9.942	386.44	86.695	1025.917	16.078
Ecad MO N-N	Non Clone- Non Clone	h1b5	9.942	259.948	40.878	934.087	16.078
Ecad MO N-N	Non Clone- Non Clone	h1b5	9.942	179.39	2.282	566.47	16.078
Ecad MO N-N	Non Clone- Non Clone
Ecad MO N-N	Non Clone- Non Clone	h1b6	6.43	467.22	54.581	1241.185	10.367
Ecad MO N-N	Non Clone- Non Clone	h1b6	6.43	302.136	51.426	1284.43	10.367
Ecad MO N-N	Non Clone- Non Clone	h1b6	6.43	207.4	14.63	924.272	10.367
Ecad MO N-N	Non Clone- Non Clone	h1b6	6.43	136.671	1.968	722.946	10.367
Ecad MO N-N	Non Clone- Non Clone	h1b6	6.43	90.898	3.03	461.237	10.367
Ecad MO N-N	Non Clone- Non Clone
Ecad MO N-N	Non Clone- Non Clone	h1b7	8.267	1256.343	225.837	4095	13.352
Ecad MO N-N	Non Clone- Non Clone	h1b7	8.267	635.533	153.854	2729.451	13.352
Ecad MO N-N	Non Clone- Non Clone	h1b7	8.267	464.707	85.899	1857.206	13.352
Ecad MO N-N	Non Clone- Non Clone	h1b7	8.267	302.036	34.465	1163.595	13.352
Ecad MO N-N	Non Clone- Non Clone	h1b7	8.267	228	26.656	1479.737	13.352
Ecad MO N-N	Non Clone- Non Clone	h1b7	8.267	192.374	6.344	2004.257	13.352
Ecad MO N-N	Non Clone- Non Clone	h1b7	8.267	169.412	3.999	634.929	13.352
Ecad MO N-N	Non Clone- Non Clone	h3b1	11.725	924.273	213.619	3145.315	18.977
Ecad MO N-N	Non Clone- Non Clone	h3b1	11.725	888.408	173.23	3819.506	18.977
Ecad MO N-N	Non Clone- Non Clone	h3b1	11.725	798.687	99.814	3240.337	18.977
Ecad MO N-N	Non Clone- Non Clone	h3b1	11.725	608.226	85.837	3141.064	18.977
Ecad MO N-N	Non Clone- Non Clone	h3b1	11.725	345.454	36.278	1332.611	18.977
Ecad MO N-N	Non Clone- Non Clone	h3b1	11.725	204.759	20.808	861.115	18.977
Ecad MO N-N	Non Clone- Non Clone
Ecad MO N-N	Non Clone- Non Clone	h3b2	9.51	1094.571	221.727	3749.495	15.375
Ecad MO N-N	Non Clone- Non Clone	h3b2	9.51	998.661	224.948	3193.471	15.375
Ecad MO N-N	Non Clone- Non Clone	h3b2	9.51	860.579	194.043	3539.013	15.375
Ecad MO N-N	Non Clone- Non Clone	h3b2	9.51	639.816	90.884	2911.591	15.375
Ecad MO N-N	Non Clone- Non Clone	h3b2	9.51	390.771	63.907	1473.375	15.375
Ecad MO N-N	Non Clone- Non Clone	h3b2	9.51	257.309	34.596	2331.041	15.375
Ecad MO N-N	Non Clone- Non Clone
Ecad MO N-N	Non Clone- Non Clone	h3b3	9.24	1149.923	124.508	4085.359	14.936
Ecad MO N-N	Non Clone- Non Clone	h3b3	9.24	1085.017	100.111	4095	14.936
Ecad MO N-N	Non Clone- Non Clone	h3b3	9.24	880.981	73.816	3877.274	14.936
Ecad MO N-N	Non Clone- Non Clone	h3b3	9.24	590.518	67.59	3057.273	14.936
Ecad MO N-N	Non Clone- Non Clone	h3b3	9.24	385.287	39.074	1663.55	14.936
Ecad MO N-N	Non Clone- Non Clone
Ecad MO N-N	Non Clone- Non Clone	h3b4	10.429	703.742	112.156	2855.461	16.869
Ecad MO N-N	Non Clone- Non Clone	h3b4	10.429	467.077	95.366	1471.293	16.869
Ecad MO N-N	Non Clone- Non Clone	h3b4	10.429	308.669	42.215	2362.893	16.869
Ecad MO N-N	Non Clone- Non Clone	h3b4	10.429	267.596	30.127	3233.062	16.869
Ecad MO N-N	Non Clone- Non Clone	h3b4	10.429	232.489	18.014	3444.423	16.869
Ecad MO N-N	Non Clone- Non Clone
Ecad MO N-N	Non Clone- Non Clone	h4b1	8.429	849.905	205.468	2174.494	13.618
Ecad MO N-N	Non Clone- Non Clone	h4b1	8.429	610.764	96.872	2280.113	13.618
Ecad MO N-N	Non Clone- Non Clone	h4b1	8.429	356.921	78.156	1553.349	13.618
Ecad MO N-N	Non Clone- Non Clone	h4b1	8.429	189.829	13.641	666.397	13.618
Ecad MO N-N	Non Clone- Non Clone	h4b1	8.429	147.136	4.345	646.74	13.618
Ecad MO N-N	Non Clone- Non Clone	h4b1	8.429	113.282	5.184	451.003	13.618
Ecad MO N-N	Non Clone- Non Clone
Ecad MO N-N	Non Clone- Non Clone	h4b2	8.375	867.937	186.441	3654.836	13.53
Ecad MO N-N	Non Clone- Non Clone	h4b2	8.375	681.115	105.178	3126.522	13.53
Ecad MO N-N	Non Clone- Non Clone	h4b2	8.375	516.127	69.275	1760.603	13.53
Ecad MO N-N	Non Clone- Non Clone	h4b2	8.375	332.855	54.439	1254.186	13.53
Ecad MO N-N	Non Clone- Non Clone	h4b2	8.375	200.177	14.342	1230.766	13.53
Ecad MO N-N	Non Clone- Non Clone	h4b2	8.375	145.76	7.297	1576.309	13.53
Ecad MO N-N	Non Clone- Non Clone
Ecad MO N-N	Non Clone- Non Clone	h4b3	8.159	1044.601	215.501	3028.415	13.179
Ecad MO N-N	Non Clone- Non Clone	h4b3	8.159	876.842	263.091	2741.684	13.179
Ecad MO N-N	Non Clone- Non Clone	h4b3	8.159	674.912	94.961	3240.528	13.179
Ecad MO N-N	Non Clone- Non Clone	h4b3	8.159	388.664	76.245	1198.789	13.179
Ecad MO N-N	Non Clone- Non Clone	h4b3	8.159	309.18	62.596	1014.011	13.179
Ecad MO N-N	Non Clone- Non Clone	h4b3	8.159	247.352	34.738	908.469	13.179
Ctrl MO C-C	Clone- Clone	h5b1	10.266	493.362	184.005	1395.021	16.605
Ctrl MO C-C	Clone- Clone	h5b1	10.266	432.491	194.519	992.169	16.605
Ctrl MO C-C	Clone- Clone	h5b1	10.266	351.802	147.932	668.992	16.605
Ctrl MO C-C	Clone- Clone	h5b1	10.266	287.969	169.329	555.992	16.605
Ctrl MO C-C	Clone- Clone	h5b1	10.266	244.097	134.835	381.596	16.605
Ctrl MO C-C	Clone- Clone
Ctrl MO C-C	Clone- Clone	h5b2	10.321	539.113	238.534	1065.754	16.693
Ctrl MO C-C	Clone- Clone	h5b2	10.321	427.339	224.667	889.162	16.693
Ctrl MO C-C	Clone- Clone	h5b2	10.321	324.844	188.817	707.367	16.693
Ctrl MO C-C	Clone- Clone	h5b2	10.321	258.883	138.596	440.902	16.693
Ctrl MO C-C	Clone- Clone
Ctrl MO C-C	Clone- Clone	h5b3	10.699	587.565	238.187	1337.867	17.308
Ctrl MO C-C	Clone- Clone	h5b3	10.699	464.461	230.655	1158.906	17.308
Ctrl MO C-C	Clone- Clone	h5b3	10.699	353.959	162.349	852.922	17.308
Ctrl MO C-C	Clone- Clone	h5b3	10.699	293.75	152.469	600.401	17.308
Ctrl MO C-C	Clone- Clone	h5b3	10.699	258.443	134.094	534.379	17.308
Ctrl MO C-C	Clone- Clone
Ctrl MO C-C	Clone- Clone	h5b4	9.456	492.767	178.19	1065.565	15.287
Ctrl MO C-C	Clone- Clone	h5b4	9.456	414.508	156.198	825.763	15.287
Ctrl MO C-C	Clone- Clone	h5b4	9.456	342.654	140.521	676.296	15.287
Ctrl MO C-C	Clone- Clone	h5b4	9.456	278.995	124.882	490.174	15.287
Ctrl MO C-C	Clone- Clone	h5b4	9.456	217.848	112.61	372.05	15.287
Ctrl MO C-C	Clone- Clone
Ctrl MO C-C	Clone- Clone	h5b5	4.971	459.01	227.511	845.168	7.995
Ctrl MO C-C	Clone- Clone	h5b5	4.971	415.875	203.421	818.158	7.995
Ctrl MO C-C	Clone- Clone	h5b5	4.971	353.131	194.518	678.297	7.995
Ctrl MO C-C	Clone- Clone	h5b5	4.971	270.681	143.51	482.181	7.995
Ctrl MO C-C	Clone- Clone	h5b5	4.971	213.555	130.336	355.088	7.995
Ctrl MO C-C	Clone- Clone
Ctrl MO C-C	Clone- Clone	h5b6	12.914	591.758	265.417	1371.725	20.91
Ctrl MO C-C	Clone- Clone	h5b6	12.914	497.716	228.337	1118.549	20.91
Ctrl MO C-C	Clone- Clone	h5b6	12.914	384.57	186.417	784.405	20.91
Ctrl MO C-C	Clone- Clone	h5b6	12.914	307.978	144.262	605.815	20.91
Ctrl MO C-C	Clone- Clone	h5b6	12.914	256.568	143.983	427.295	20.91
Ctrl MO C-C	Clone- Clone	h6b1	3.134	1051.249	449.283	2193.457	5.008
Ctrl MO C-C	Clone- Clone	h6b1	9.78	625.114	235.136	1368.935	15.815
Ctrl MO C-C	Clone- Clone	h6b1	9.78	527.744	248.841	1293.231	15.815
Ctrl MO C-C	Clone- Clone	h6b1	9.78	437.031	216.372	821.977	15.815
Ctrl MO C-C	Clone- Clone	h6b1	9.78	370.914	177.864	612.501	15.815
Ctrl MO C-C	Clone- Clone	h6b1	9.78	327.259	159.869	556.638	15.815
Ctrl MO C-C	Clone- Clone
Ctrl MO C-C	Clone- Clone	h6b2	9.78	625.114	235.136	1368.935	15.815
Ctrl MO C-C	Clone- Clone	h6b2	9.78	527.744	248.841	1293.231	15.815
Ctrl MO C-C	Clone- Clone	h6b2	9.78	437.031	216.372	821.977	15.815
Ctrl MO C-C	Clone- Clone	h6b2	9.78	370.914	177.864	612.501	15.815
Ctrl MO C-C	Clone- Clone	h6b2	9.78	327.259	159.869	556.638	15.815
Ctrl MO C-C	Clone- Clone
Ctrl MO C-C	Clone- Clone	h6b3	6.808	785.762	316.898	1415.842	10.982
Ctrl MO C-C	Clone- Clone	h6b3	6.808	675.038	226.571	1378.642	10.982
Ctrl MO C-C	Clone- Clone	h6b3	6.808	553.694	273.559	1227.167	10.982
Ctrl MO C-C	Clone- Clone	h6b3	6.808	459.11	226.847	925.124	10.982
Ctrl MO C-C	Clone- Clone	h6b3	6.808	389.664	178.37	706.537	10.982
Ctrl MO C-C	Clone- Clone
Ctrl MO C-C	Clone- Clone	h6b4	7.565	641.023	270.755	1302.685	12.212
Ctrl MO C-C	Clone- Clone	h6b4	7.565	551.774	274.244	1049.057	12.212
Ctrl MO C-C	Clone- Clone	h6b4	7.565	440.354	227.486	795.061	12.212
Ctrl MO C-C	Clone- Clone	h6b4	7.565	372.619	211.437	613.033	12.212
Ctrl MO C-C	Clone- Clone	h6b4	7.565	320.844	177.504	523.298	12.212
Ctrl MO C-C	Clone- Clone
Ctrl MO C-C	Clone- Clone	h6b5	9.348	645.363	268.943	1423.236	15.112
Ctrl MO C-C	Clone- Clone	h6b5	9.348	530.951	235.578	1105.515	15.112
Ctrl MO C-C	Clone- Clone	h6b5	9.348	431.97	214.113	821.116	15.112
Ctrl MO C-C	Clone- Clone	h6b5	9.348	361.262	196.911	623.849	15.112
Ctrl MO C-C	Clone- Clone	h6b5	9.348	315.472	146.863	627.078	15.112
Ctrl MO C-C	Clone- Clone
Ctrl MO C-C	Clone- Clone	h6b6	12.428	696.551	310.391	1556.97	20.117
Ctrl MO C-C	Clone- Clone	h6b6	12.428	619.581	273.407	1358.222	20.117
Ctrl MO C-C	Clone- Clone	h6b6	12.428	505.518	262.239	1012.535	20.117
Ctrl MO C-C	Clone- Clone	h6b6	12.428	402.688	194.021	688.59	20.117
Ctrl MO C-C	Clone- Clone	h6b6	12.428	345.275	194.271	641.683	20.117
Ctrl MO C-C	Clone- Clone	h7b1	8.97	177.476	99.891	343.13	14.497
Ctrl MO C-C	Clone- Clone	h7b1	8.97	184.446	101.02	428.426	14.497
Ctrl MO C-C	Clone- Clone	h7b1	8.97	188.203	101.954	405.145	14.497
Ctrl MO C-C	Clone- Clone	h7b1	8.97	188.5	99.933	357.474	14.497
Ctrl MO C-C	Clone- Clone	h7b1	8.97	177.234	100.096	412	14.497
Ctrl MO C-C	Clone- Clone	h7b1	8.97	158.969	98.195	325.276	14.497
Ctrl MO C-C	Clone- Clone
Ctrl MO C-C	Clone- Clone	h7b2	15.13	225.099	105.3	434.438	24.512
Ctrl MO C-C	Clone- Clone	h7b2	15.13	231.005	107.006	510.74	24.512
Ctrl MO C-C	Clone- Clone	h7b2	15.13	226.937	109.315	445.341	24.512
Ctrl MO C-C	Clone- Clone	h7b2	15.13	211.531	116.149	474.397	24.512
Ctrl MO C-C	Clone- Clone	h7b2	15.13	184.409	102.812	386.567	24.512
Ctrl MO C-C	Clone- Clone	h7b2	15.13	163.214	96.347	521.557	24.512
Ctrl MO C-C	Clone- Clone	h7b2	15.13	149.751	99.455	529.292	24.512
Ctrl MO C-C	Clone- Clone	h7b2	15.13	139.785	95.56	302.929	24.512
Ctrl MO C-C	Clone- Clone
Ctrl MO C-C	Clone- Clone	h7b3	5.89	141.01	98.563	290.15	9.489
Ctrl MO C-C	Clone- Clone	h7b3	5.89	131.463	99.022	287.3	9.489
Ctrl MO C-C	Clone- Clone	h7b3	5.89	124.407	92.972	227.54	9.489
Ctrl MO C-C	Clone- Clone	h7b3	5.89	119.102	93.066	213.327	9.489
Ctrl MO C-C	Clone- Clone
Ctrl MO C-C	Clone- Clone	h7b4	6.754	145.491	98.728	268.68	10.894
Ctrl MO C-C	Clone- Clone	h7b4	6.754	137.415	95.73	286.755	10.894
Ctrl MO C-C	Clone- Clone	h7b4	6.754	129.799	95.591	280.17	10.894
Ctrl MO C-C	Clone- Clone	h7b4	6.754	126.221	92.226	380.673	10.894
Ctrl MO C-C	Clone- Clone
Ctrl MO C-C	Clone- Clone	h8b1	12.698	172.581	105.469	307.86	20.559
Ctrl MO C-C	Clone- Clone	h8b1	12.698	168.189	102.655	334.944	20.559
Ctrl MO C-C	Clone- Clone	h8b1	12.698	160.79	99.9	319.829	20.559
Ctrl MO C-C	Clone- Clone	h8b1	12.698	144.981	99.018	281.326	20.559
Ctrl MO C-C	Clone- Clone	h8b1	12.698	130.794	93.684	227.254	20.559
Ctrl MO C-C	Clone- Clone
Ctrl MO C-C	Clone- Clone	h8b2	6.16	152.46	92.513	259.928	9.928
Ctrl MO C-C	Clone- Clone	h8b2	6.16	142.552	99.611	251.168	9.928
Ctrl MO C-C	Clone- Clone	h8b2	6.16	135.648	98.638	251.776	9.928
Ctrl MO C-C	Clone- Clone	h8b2	6.16	128.886	98.18	289.362	9.928
Ctrl MO C-C	Clone- Clone	h8b2	6.16	118.59	94.53	191.151	9.928
Ctrl MO C-C	Clone- Clone	h8b2	6.16	113.782	95.354	177.719	9.928
Ctrl MO C-C	Clone- Clone	h8b2	6.16	110.665	95.635	156.614	9.928
Ctrl MO C-C	Clone- Clone
Ctrl MO C-C	Clone- Clone	h8b3	8.591	159.816	104.294	266.678	13.882
Ctrl MO C-C	Clone- Clone	h8b3	8.591	145.4	97.681	233.065	13.882
Ctrl MO C-C	Clone- Clone	h8b3	8.591	133.484	98.882	260.852	13.882
Ctrl MO C-C	Clone- Clone	h8b3	8.591	124.18	95.357	199.776	13.882
Ctrl MO C-C	Clone- Clone	h8b3	8.591	117.757	95.133	205.81	13.882
Ctrl MO C-C	Clone- Clone	h8b3	8.591	112.157	95.238	183.081	13.882
Ctrl MO C-C	Clone- Clone	h8b3	8.591	108.522	94.907	170.469	13.882
Ctrl MO C-C	Clone- Clone
Ctrl MO C-C	Clone- Clone	h9b1	7.078	284.534	145.283	528.576	11.422
Ctrl MO C-C	Clone- Clone	h9b1	7.078	273.241	112.734	497.169	11.422
Ctrl MO C-C	Clone- Clone	h9b1	7.078	255.669	112.907	494.985	11.422
Ctrl MO C-C	Clone- Clone	h9b1	7.078	229.661	120.322	425.498	11.422
Ctrl MO C-C	Clone- Clone	h9b1	7.078	211.221	119.706	391.108	11.422
Ctrl MO C-C	Clone- Clone	h9b1	7.997	187.264	100.606	372.283	12.908
Ctrl MO C-C	Clone- Clone	h9b1	7.997	180.689	101.853	353.942	12.908
Ctrl MO C-C	Clone- Clone	h9b1	7.997	173.61	100.307	330.535	12.908
Ctrl MO C-C	Clone- Clone	h9b1	7.997	162.531	93.931	314.242	12.908
Ctrl MO C-C	Clone- Clone	h9b1	7.997	147.787	94.598	291.897	12.908
Ctrl MO C-C	Clone- Clone
Ctrl MO C-C	Clone- Clone	h9b2	3.674	227.926	124.286	487.328	5.887
Ctrl MO C-C	Clone- Clone	h9b2	3.674	204.256	118.868	381.138	5.887
Ctrl MO C-C	Clone- Clone	h9b2	3.674	174.922	108.491	359.87	5.887
Ctrl MO C-C	Clone- Clone	h9b2	3.674	156.651	103.094	255.952	5.887
Ctrl MO C-C	Clone- Clone	h9b2	3.674	137.846	106.431	202.629	5.887
Ctrl MO C-C	Clone- Clone
Ctrl MO C-C	Clone- Clone	h9b3	13.4	223.763	112.979	444.988	21.701
Ctrl MO C-C	Clone- Clone	h9b3	13.4	207.748	103.559	388.921	21.701
Ctrl MO C-C	Clone- Clone	h9b3	13.4	193.531	100.919	416.221	21.701
Ctrl MO C-C	Clone- Clone	h9b3	13.4	174.386	96.803	356.955	21.701
Ctrl MO C-C	Clone- Clone	h9b3	13.4	159.819	96.592	353.024	21.701
Ctrl MO C-C	Clone- Clone
Ctrl MO C-C	Clone- Clone	h9b4	5.133	192.707	110.968	406.163	8.259
Ctrl MO C-C	Clone- Clone	h9b4	5.133	178.113	104.233	340.037	8.259
Ctrl MO C-C	Clone- Clone	h9b4	5.133	160.99	100.124	272.928	8.259
Ctrl MO C-C	Clone- Clone	h9b4	5.133	143.549	91.843	248.956	8.259
Ctrl MO C-C	Clone- Clone	h9b4	5.133	133.878	100.171	198.61	8.259
Ctrl MO C-C	Clone- Clone
Ctrl MO C-C	Clone- Clone	h9b5	7.781	169.862	105.388	361.269	12.564
Ctrl MO C-C	Clone- Clone	h9b5	7.781	161.003	102.266	346.187	12.564
Ctrl MO C-C	Clone- Clone	h9b5	7.781	147.141	93.749	295.987	12.564
Ctrl MO C-C	Clone- Clone	h9b5	7.781	134.447	94.15	281.799	12.564
Ctrl MO C-C	Clone- Clone	h9b5	7.781	125.464	92.516	220.272	12.564
Ctrl MO C-C	Clone- Clone	h9b5	7.781	125.464	92.516	220.272	12.564
Ctrl MO C-C	Clone- Clone
Ctrl MO C-C	Clone- Clone	h9b6	9.402	219.567	108.594	420.835	15.2
Ctrl MO C-C	Clone- Clone	h9b6	9.402	212.162	113.749	364.105	15.2
Ctrl MO C-C	Clone- Clone	h9b6	9.402	203.625	108.302	471.159	15.2
Ctrl MO C-C	Clone- Clone	h9b6	9.402	194.507	98.062	485.763	15.2
Ctrl MO C-C	Clone- Clone	h9b6	9.402	179.82	101.301	487.901	15.2
Ctrl MO C-C	Clone- Clone	h9b6	9.402	170.868	102.142	353.462	15.2
Ctrl MO C-C	Clone- Clone
Ctrl MO C-C	Clone- Clone	h9b7	8.645	223.053	113.524	526.061	13.97
Ctrl MO C-C	Clone- Clone	h9b7	8.645	204.817	108.299	499.2	13.97
Ctrl MO C-C	Clone- Clone	h9b7	8.645	190.52	106.341	464.451	13.97
Ctrl MO C-C	Clone- Clone	h9b7	8.645	174.92	95.53	435.578	13.97
Ctrl MO C-C	Clone- Clone	h9b7	8.645	162.621	98.564	447.094	13.97
Ctrl MO C-C	Clone- Clone	h9b7	8.645	149.209	97.37	386.241	13.97
Ctrl MO C-C	Clone- Clone
Ctrl MO C-C	Clone- Clone	h9b8	7.078	181.931	107.873	337.215	11.422
Ctrl MO C-C	Clone- Clone	h9b8	7.078	165.639	103.227	422.534	11.422
Ctrl MO C-C	Clone- Clone	h9b8	7.078	153.237	99.645	383.002	11.422
Ctrl MO C-C	Clone- Clone	h9b8	7.078	137.871	98.487	323.572	11.422
Ctrl MO C-C	Clone- Clone	h9b8	7.078	129.58	92.87	265.949	11.422
Ctrl MO C-C	Clone- Clone
Ctrl MO C-C	Clone- Clone	h9b9	7.943	186.188	101.78	384.413	12.827
Ctrl MO C-C	Clone- Clone	h9b9	7.943	188.577	106.996	429.422	12.827
Ctrl MO C-C	Clone- Clone	h9b9	7.943	190.663	111.854	493.237	12.827
Ctrl MO C-C	Clone- Clone	h9b9	7.943	184.049	107.048	350.591	12.827
Ctrl MO C-C	Clone- Clone	h9b9	7.943	176.737	109.304	330.374	12.827
Ctrl MO C-C	Clone- Clone	h9b9	7.943	162.781	105.754	323.959	12.827
Ctrl MO C-C	Clone- Clone	h9b9	7.943	150.969	98.084	268.654	12.827
Ctrl MO C-C	Clone- Clone
Ctrl MO C-C	Clone- Clone	h9b10	7.403	199.563	108.118	399.631	11.949
Ctrl MO C-C	Clone- Clone	h9b10	7.403	183.097	99.288	400.531	11.949
Ctrl MO C-C	Clone- Clone	h9b10	7.403	162.188	106.365	329.454	11.949
Ctrl MO C-C	Clone- Clone	h9b10	7.403	151.082	100.423	244.409	11.949
Ctrl MO C-C	Clone- Clone	h9b10	7.403	140.73	96.011	231.369	11.949
Ctrl MO C-C	Clone- Clone	h9b10	7.403	135.036	95.001	203.768	11.949
Ctrl MO C-C	Clone- Clone
Ctrl MO C-C	Clone- Clone	h9b11	11.023	171.047	102.353	376.386	17.835
Ctrl MO C-C	Clone- Clone	h9b11	11.023	165.117	94.767	399.093	17.835
Ctrl MO C-C	Clone- Clone	h9b11	11.023	154.591	91.713	378.959	17.835
Ctrl MO C-C	Clone- Clone	h9b11	11.023	147.01	96.179	378.974	17.835
Ctrl MO C-C	Clone- Clone	h9b11	11.023	138.271	92.933	354.52	17.835
Ctrl MO C-C	Clone- Clone	h9b11	11.023	132.031	96.595	266.029	17.835
Ctrl MO C-C	Clone- Clone	h9b11	11.023	127.874	94.403	214.374	17.835
Ctrl MO N-C	Non Clone- Clone	h5b1	12.86	462.482	197.133	1143.598	20.823
Ctrl MO N-C	Non Clone- Clone	h5b1	12.86	383.3	157.89	803.853	20.823
Ctrl MO N-C	Non Clone- Clone	h5b1	12.86	305.708	138.578	621.672	20.823
Ctrl MO N-C	Non Clone- Clone	h5b1	12.86	238.125	122.356	483.234	20.823
Ctrl MO N-C	Non Clone- Clone	h5b1	12.86	201.959	98.864	327.935	20.823
Ctrl MO N-C	Non Clone- Clone
Ctrl MO N-C	Non Clone- Clone	h5b2	13.509	395.932	132.166	966.885	21.877
Ctrl MO N-C	Non Clone- Clone	h5b2	13.509	381.602	144.209	974.25	21.877
Ctrl MO N-C	Non Clone- Clone	h5b2	13.509	342.436	150.029	751.19	21.877
Ctrl MO N-C	Non Clone- Clone	h5b2	13.509	304.589	129.368	741.238	21.877
Ctrl MO N-C	Non Clone- Clone	h5b2	13.509	266.249	117.042	584.274	21.877
Ctrl MO N-C	Non Clone- Clone	h5b2	13.509	232.336	118.552	641.299	21.877
Ctrl MO N-C	Non Clone- Clone
Ctrl MO N-C	Non Clone- Clone	h5b3	11.779	414.731	184.297	1140.618	19.065
Ctrl MO N-C	Non Clone- Clone	h5b3	11.779	421.474	186.579	926.691	19.065
Ctrl MO N-C	Non Clone- Clone	h5b3	11.779	385.028	160.09	682.815	19.065
Ctrl MO N-C	Non Clone- Clone	h5b3	11.779	337.413	170.862	641.074	19.065
Ctrl MO N-C	Non Clone- Clone	h5b3	11.779	270.128	141.562	515.341	19.065
Ctrl MO N-C	Non Clone- Clone	h5b3	11.779	218.226	110.836	356.796	19.065
Ctrl MO N-C	Non Clone- Clone
Ctrl MO N-C	Non Clone- Clone	h5b4	8.754	483.284	216.053	1361.611	14.145
Ctrl MO N-C	Non Clone- Clone	h5b4	8.754	502.354	233.689	1082.257	14.145
Ctrl MO N-C	Non Clone- Clone	h5b4	8.754	499.622	265.668	973.306	14.145
Ctrl MO N-C	Non Clone- Clone	h5b4	8.754	449.596	193.551	918.02	14.145
Ctrl MO N-C	Non Clone- Clone	h5b4	8.754	376.011	190.461	685.013	14.145
Ctrl MO N-C	Non Clone- Clone	h5b4	8.754	328.72	170.61	538.579	14.145
Ctrl MO N-C	Non Clone- Clone	h5b4	8.754	297.052	140.848	497.336	14.145
Ctrl MO N-C	Non Clone- Clone	h6b1	7.511	554.565	236.007	1431.217	12.125
Ctrl MO N-C	Non Clone- Clone	h6b1	7.511	477.518	199.126	1274.305	12.125
Ctrl MO N-C	Non Clone- Clone	h6b1	7.511	396.695	183.568	692.971	12.125
Ctrl MO N-C	Non Clone- Clone	h6b1	7.511	348.255	159.557	609.351	12.125
Ctrl MO N-C	Non Clone- Clone	h6b1	7.511	314.977	159.164	538.981	12.125
Ctrl MO N-C	Non Clone- Clone
Ctrl MO N-C	Non Clone- Clone	h6b2	6.7	565.421	259.113	1096.874	10.807
Ctrl MO N-C	Non Clone- Clone	h6b2	6.7	497.283	240.509	1007.112	10.807
Ctrl MO N-C	Non Clone- Clone	h6b2	6.7	429.392	214.145	909.996	10.807
Ctrl MO N-C	Non Clone- Clone	h6b2	6.7	377.678	216.499	728.493	10.807
Ctrl MO N-C	Non Clone- Clone
Ctrl MO N-C	Non Clone- Clone	h6b3	7.727	769.592	308.199	1543.928	12.465
Ctrl MO N-C	Non Clone- Clone	h6b3	7.727	708.066	278.743	1578.081	12.465
Ctrl MO N-C	Non Clone- Clone	h6b3	7.727	617.094	281.549	1545.058	12.465
Ctrl MO N-C	Non Clone- Clone	h6b3	7.727	527.317	231.597	1406.365	12.465
Ctrl MO N-C	Non Clone- Clone	h6b3	7.727	436.203	217.133	935.469	12.465
Ctrl MO N-C	Non Clone- Clone	h6b3	7.727	375.955	189.001	806.667	12.465
Ctrl MO N-C	Non Clone- Clone
Ctrl MO N-C	Non Clone- Clone	h6b4	6.97	559.528	243.911	1260.329	11.246
Ctrl MO N-C	Non Clone- Clone	h6b4	6.97	473.159	215.054	971.056	11.246
Ctrl MO N-C	Non Clone- Clone	h6b4	6.97	393.747	210.978	777.368	11.246
Ctrl MO N-C	Non Clone- Clone	h6b4	6.97	340.736	196.978	642.239	11.246
Ctrl MO N-C	Non Clone- Clone	h6b4	6.97	300.812	179.094	497.526	11.246
Ctrl MO N-C	Non Clone- Clone	h6b4	6.97	273.095	130.998	451.856	11.246
Ctrl MO N-C	Non Clone- Clone
Ctrl MO N-C	Non Clone- Clone	h6b5	8.483	468.249	201.722	999.324	13.706
Ctrl MO N-C	Non Clone- Clone	h6b5	8.483	396.139	195.71	819.312	13.706
Ctrl MO N-C	Non Clone- Clone	h6b5	8.483	347.75	157.608	730.423	13.706
Ctrl MO N-C	Non Clone- Clone	h6b5	8.483	322.973	178.698	584.303	13.706
Ctrl MO N-C	Non Clone- Clone	h6b5	8.483	298.972	168.947	550.117	13.706
Ctrl MO N-C	Non Clone- Clone	h6b5	8.483	279.826	161.925	476.395	13.706
Ctrl MO N-C	Non Clone- Clone
Ctrl MO N-C	Non Clone- Clone	h6b6	5.403	581.597	246.967	1254.139	8.698
Ctrl MO N-C	Non Clone- Clone	h6b6	5.403	507.032	215.477	1076.02	8.698
Ctrl MO N-C	Non Clone- Clone	h6b6	5.403	428.644	208.04	902.485	8.698
Ctrl MO N-C	Non Clone- Clone	h6b6	5.403	366.436	178.512	588.267	8.698
Ctrl MO N-C	Non Clone- Clone	h6b6	5.403	323.332	177.123	521.342	8.698
Ctrl MO N-C	Non Clone- Clone
Ctrl MO N-C	Non Clone- Clone	h6b7	7.187	635.097	278.904	1427.996	11.586
Ctrl MO N-C	Non Clone- Clone	h6b7	7.187	591.202	277.578	1230.544	11.586
Ctrl MO N-C	Non Clone- Clone	h6b7	7.187	511.7	268.171	921.336	11.586
Ctrl MO N-C	Non Clone- Clone	h6b7	7.187	423.279	201.483	740.459	11.586
Ctrl MO N-C	Non Clone- Clone	h6b7	7.187	349.692	163.681	647.8	11.586
Ctrl MO N-C	Non Clone- Clone	h6b7	7.187	299.767	184.68	561.369	11.586
Ctrl MO N-C	Non Clone- Clone
Ctrl MO N-C	Non Clone- Clone	h6b8	9.456	611.064	271.052	1386.932	15.287
Ctrl MO N-C	Non Clone- Clone	h6b8	9.456	547.589	230.337	1466.271	15.287
Ctrl MO N-C	Non Clone- Clone	h6b8	9.456	447.447	212.13	1033.109	15.287
Ctrl MO N-C	Non Clone- Clone	h6b8	9.456	357.834	177.185	729.225	15.287
Ctrl MO N-C	Non Clone- Clone	h6b8	9.456	299.707	152.69	567.235	15.287
Ctrl MO N-C	Non Clone- Clone	h6b8	9.456	262.998	139.963	507.646	15.287
Ctrl MO N-C	Non Clone- Clone	h6b8	9.456	238.601	111.396	389.856	15.287
Ctrl MO N-C	Non Clone- Clone	h7b1	13.238	174.557	94.796	575.927	21.437
Ctrl MO N-C	Non Clone- Clone	h7b1	13.238	160.853	92.829	492.825	21.437
Ctrl MO N-C	Non Clone- Clone	h7b1	13.238	150.873	95.634	447.608	21.437
Ctrl MO N-C	Non Clone- Clone	h7b1	13.238	142.135	96.788	326.208	21.437
Ctrl MO N-C	Non Clone- Clone	h7b1	13.238	132.982	92.74	291.579	21.437
Ctrl MO N-C	Non Clone- Clone
Ctrl MO N-C	Non Clone- Clone	h7b2	10.104	321.664	149.633	880.365	16.342
Ctrl MO N-C	Non Clone- Clone	h7b2	10.104	278.278	135.388	736.433	16.342
Ctrl MO N-C	Non Clone- Clone	h7b2	10.104	225.287	116.34	513.881	16.342
Ctrl MO N-C	Non Clone- Clone	h7b2	10.104	181.219	110.758	408.085	16.342
Ctrl MO N-C	Non Clone- Clone	h7b2	10.645	230.465	105.498	668.129	17.22
Ctrl MO N-C	Non Clone- Clone	h8b1	5.836	172.219	102.622	391.028	9.401
Ctrl MO N-C	Non Clone- Clone	h8b1	5.836	164.832	101.48	359.957	9.401
Ctrl MO N-C	Non Clone- Clone	h8b1	5.836	153.853	99.43	304.919	9.401
Ctrl MO N-C	Non Clone- Clone	h8b1	5.836	146.475	92.294	287.223	9.401
Ctrl MO N-C	Non Clone- Clone	h8b1	5.836	139.685	95.911	278.331	9.401
Ctrl MO N-C	Non Clone- Clone	h8b1	5.836	129.991	94.532	234.01	9.401
Ctrl MO N-C	Non Clone- Clone	h9b1	5.998	226.023	126.816	462.858	9.664
Ctrl MO N-C	Non Clone- Clone	h9b1	5.998	209.781	114.51	419.532	9.664
Ctrl MO N-C	Non Clone- Clone	h9b1	5.998	187.056	113.919	340.822	9.664
Ctrl MO N-C	Non Clone- Clone	h9b1	5.998	169.259	102.366	373.937	9.664
Ctrl MO N-C	Non Clone- Clone	h9b1	5.998	153.688	100.493	280.521	9.664
Ctrl MO N-C	Non Clone- Clone	h9b1	5.998	141.009	97.503	251.304	9.664
Ctrl MO N-C	Non Clone- Clone	h9b1	5.998	130.192	96.191	256.979	9.664
Ctrl MO N-C	Non Clone- Clone
Ctrl MO N-C	Non Clone- Clone	h9b2	7.835	214.899	100.057	385.039	12.652
Ctrl MO N-C	Non Clone- Clone	h9b2	7.835	206.847	111.1	428.476	12.652
Ctrl MO N-C	Non Clone- Clone	h9b2	7.835	203.894	102.827	367.409	12.652
Ctrl MO N-C	Non Clone- Clone	h9b2	7.835	195.143	106.062	362.215	12.652
Ctrl MO N-C	Non Clone- Clone	h9b2	7.835	185.916	99.617	360.973	12.652
Ctrl MO N-C	Non Clone- Clone	h9b2	7.835	170.817	100.314	347.718	12.652
Ctrl MO N-C	Non Clone- Clone	h9b2	7.835	150.022	92.249	260.385	12.652
Ctrl MO N-C	Non Clone- Clone
Ctrl MO N-C	Non Clone- Clone	h9b3	12.968	194.796	105.801	411.327	20.998
Ctrl MO N-C	Non Clone- Clone	h9b3	12.968	186.015	95.107	365.867	20.998
Ctrl MO N-C	Non Clone- Clone	h9b3	12.968	174.623	102.031	359.826	20.998
Ctrl MO N-C	Non Clone- Clone	h9b3	12.968	164.845	98.759	318.893	20.998
Ctrl MO N-C	Non Clone- Clone	h9b3	12.968	153.049	98.978	345.891	20.998
Ctrl MO N-C	Non Clone- Clone	h9b3	12.968	142.704	97.546	262.158	20.998
Ctrl MO N-C	Non Clone- Clone
Ctrl MO N-C	Non Clone- Clone	h9b4	10.158	173.584	105.739	306.497	16.43
Ctrl MO N-C	Non Clone- Clone	h9b4	10.158	159.533	102.53	294.987	16.43
Ctrl MO N-C	Non Clone- Clone	h9b4	10.158	149.879	99.398	294.55	16.43
Ctrl MO N-C	Non Clone- Clone	h9b4	10.158	141.978	103.165	227.164	16.43
Ctrl MO N-C	Non Clone- Clone	h9b4	10.158	136.837	99.441	249.125	16.43
Ctrl MO N-C	Non Clone- Clone	h9b4	10.158	132.776	95.827	231.566	16.43
Ctrl MO N-C	Non Clone- Clone
Ctrl MO N-N	Non Clone- Non Clone	h5b1	7.241	553.524	246.055	1247.871	11.685
Ctrl MO N-N	Non Clone- Non Clone	h5b1	7.241	578.562	254.719	996.032	11.685
Ctrl MO N-N	Non Clone- Non Clone	h5b1	7.241	510.501	276.036	1049.737	11.685
Ctrl MO N-N	Non Clone- Non Clone	h5b1	7.241	400.366	211.055	879.076	11.685
Ctrl MO N-N	Non Clone- Non Clone	h5b1	7.241	309.298	158.516	598.379	11.685
Ctrl MO N-N	Non Clone- Non Clone
Ctrl MO N-N	Non Clone- Non Clone	h5b2	8.267	667.609	287.602	1669.606	13.354
Ctrl MO N-N	Non Clone- Non Clone	h5b2	8.267	678.559	274.551	1590.965	13.354
Ctrl MO N-N	Non Clone- Non Clone	h5b2	8.267	596.876	283.496	1215.407	13.354
Ctrl MO N-N	Non Clone- Non Clone	h5b2	8.267	484.854	218.786	948.075	13.354
Ctrl MO N-N	Non Clone- Non Clone	h5b2	8.267	380.964	185.354	663.258	13.354
Ctrl MO N-N	Non Clone- Non Clone
Ctrl MO N-N	Non Clone- Non Clone	h5b3	10.158	342.693	158.762	674.434	16.43
Ctrl MO N-N	Non Clone- Non Clone	h5b3	10.158	341.262	168.103	621.24	16.43
Ctrl MO N-N	Non Clone- Non Clone	h5b3	10.158	314.159	153.019	634.493	16.43
Ctrl MO N-N	Non Clone- Non Clone	h5b3	10.158	277.668	131.197	602.007	16.43
Ctrl MO N-N	Non Clone- Non Clone	h5b3	10.158	247.055	145.36	500.684	16.43
Ctrl MO N-N	Non Clone- Non Clone
Ctrl MO N-N	Non Clone- Non Clone	h5b4	10.915	322.227	114.853	702.603	17.66
Ctrl MO N-N	Non Clone- Non Clone	h5b4	10.915	303.042	117.494	640.349	17.66
Ctrl MO N-N	Non Clone- Non Clone	h5b4	10.915	284.655	117.135	582.544	17.66
Ctrl MO N-N	Non Clone- Non Clone	h5b4	10.915	259.646	130.812	495.08	17.66
Ctrl MO N-N	Non Clone- Non Clone
Ctrl MO N-N	Non Clone- Non Clone	h5b5	8.916	586.6	241.761	1390.468	14.409
Ctrl MO N-N	Non Clone- Non Clone	h5b5	8.916	586.6	241.761	1390.468	14.409
Ctrl MO N-N	Non Clone- Non Clone	h5b5	8.916	504.38	193.014	1097.137	14.409
Ctrl MO N-N	Non Clone- Non Clone	h5b5	8.916	395.781	200.353	801.248	14.409
Ctrl MO N-N	Non Clone- Non Clone	h5b5	8.916	306.932	146.715	837.439	14.409
Ctrl MO N-N	Non Clone- Non Clone	h5b5	8.916	236.572	123.682	630.669	14.409
Ctrl MO N-N	Non Clone- Non Clone	h6b1	8.97	497.724	183.141	1001.272	14.497
Ctrl MO N-N	Non Clone- Non Clone	h6b1	8.97	443.965	150.021	840.354	14.497
Ctrl MO N-N	Non Clone- Non Clone	h6b1	8.97	391.508	177.62	841.162	14.497
Ctrl MO N-N	Non Clone- Non Clone	h6b1	8.97	334.303	156.29	614.093	14.497
Ctrl MO N-N	Non Clone- Non Clone	h6b1	8.97	291.2	130.683	528.15	14.497
Ctrl MO N-N	Non Clone- Non Clone	h6b1	8.97	263.507	137.482	501.791	14.497
Ctrl MO N-N	Non Clone- Non Clone
Ctrl MO N-N	Non Clone- Non Clone	h6b2	9.132	541.239	246.49	1199.323	14.76
Ctrl MO N-N	Non Clone- Non Clone	h6b2	9.132	461.458	192.982	1211.283	14.76
Ctrl MO N-N	Non Clone- Non Clone	h6b2	9.132	393.954	181.565	1100.156	14.76
Ctrl MO N-N	Non Clone- Non Clone	h6b2	9.132	334.741	163.674	701.218	14.76
Ctrl MO N-N	Non Clone- Non Clone	h6b2	9.132	293.236	155.995	585.332	14.76
Ctrl MO N-N	Non Clone- Non Clone
Ctrl MO N-N	Non Clone- Non Clone	h6b3	9.618	691.747	197.415	1818.462	15.551
Ctrl MO N-N	Non Clone- Non Clone	h6b3	9.618	587.597	235.725	1407.471	15.551
Ctrl MO N-N	Non Clone- Non Clone	h6b3	9.618	487.201	182.477	1404.275	15.551
Ctrl MO N-N	Non Clone- Non Clone	h6b3	9.618	406.184	174.011	1142.217	15.551
Ctrl MO N-N	Non Clone- Non Clone	h6b3	9.618	335.048	131.645	852.691	15.551
Ctrl MO N-N	Non Clone- Non Clone
Ctrl MO N-N	Non Clone- Non Clone	h6b4	10.158	661.856	258.585	1833.292	16.389
Ctrl MO N-N	Non Clone- Non Clone	h6b4	10.158	628.067	257.205	1788.06	16.389
Ctrl MO N-N	Non Clone- Non Clone	h6b4	10.158	534.749	199.738	1483.229	16.389
Ctrl MO N-N	Non Clone- Non Clone	h6b4	10.158	450.093	216.429	963.089	16.389
Ctrl MO N-N	Non Clone- Non Clone	h6b4	10.158	373.726	206.685	751.127	16.389
Ctrl MO N-N	Non Clone- Non Clone
Ctrl MO N-N	Non Clone- Non Clone
Ctrl MO N-N	Non Clone- Non Clone	h7b1	10.645	209.386	107.635	693.381	17.22
Ctrl MO N-N	Non Clone- Non Clone	h7b1	10.645	179.833	100.693	617.578	17.22
Ctrl MO N-N	Non Clone- Non Clone	h7b1	11.401	213.424	106.014	518.072	18.45
Ctrl MO N-N	Non Clone- Non Clone	h7b1	11.401	183.551	102.729	392.383	18.45
Ctrl MO N-N	Non Clone- Non Clone	h7b1	11.401	156.099	98.294	291.473	18.45
Ctrl MO N-N	Non Clone- Non Clone
Ctrl MO N-N	Non Clone- Non Clone	h7b2	6.646	171.401	102.043	491.532	10.719
Ctrl MO N-N	Non Clone- Non Clone	h7b2	6.646	156.162	100.031	283.005	10.719
Ctrl MO N-N	Non Clone- Non Clone	h7b2	6.646	137.907	93.072	224.199	10.719
Ctrl MO N-N	Non Clone- Non Clone	h7b2	6.646	125.54	94.871	205.237	10.719
Ctrl MO N-N	Non Clone- Non Clone	h8b1	9.078	213.441	117.331	492.024	14.672
Ctrl MO N-N	Non Clone- Non Clone	h8b1	9.078	180.424	104.926	334.563	14.672
Ctrl MO N-N	Non Clone- Non Clone	h8b1	9.078	155.14	98.327	282.993	14.672
Ctrl MO N-N	Non Clone- Non Clone	h8b1	9.078	142.365	97.333	226.455	14.672
Ctrl MO N-N	Non Clone- Non Clone	h8b1	9.078	135.865	96.89	218.608	14.672
Ctrl MO N-N	Non Clone- Non Clone	h8b1	9.078	129.389	96.247	205.279	14.672
Ctrl MO N-N	Non Clone- Non Clone	h8b1	9.078	122.795	92.045	188.842	14.672
Ctrl MO N-N	Non Clone- Non Clone
Ctrl MO N-N	Non Clone- Non Clone	h8b2	6.214	195.948	116.12	457.73	10.006
Ctrl MO N-N	Non Clone- Non Clone	h8b2	6.214	172.816	99.893	379.231	10.006
Ctrl MO N-N	Non Clone- Non Clone	h8b2	6.214	149.921	101.685	340.058	10.006
Ctrl MO N-N	Non Clone- Non Clone	h8b2	6.214	144.486	95.4	304.153	10.006
Ctrl MO N-N	Non Clone- Non Clone	h8b2	6.214	137.984	103.591	266.987	10.006
Ctrl MO N-N	Non Clone- Non Clone
Ctrl MO N-N	Non Clone- Non Clone	h8b3	9.51	132.373	99.272	216.943	15.375
Ctrl MO N-N	Non Clone- Non Clone	h8b3	9.51	123.828	96.368	190.379	15.375
Ctrl MO N-N	Non Clone- Non Clone	h8b3	9.51	115.783	94.621	192.25	15.375
Ctrl MO N-N	Non Clone- Non Clone	h8b3	9.51	109.867	93.857	168.587	15.375
Ctrl MO N-N	Non Clone- Non Clone
Ctrl MO N-N	Non Clone- Non Clone	h8b4	10.158	166.701	103.46	313.041	16.43
Ctrl MO N-N	Non Clone- Non Clone	h8b4	10.158	161.097	97.671	343.29	16.43
Ctrl MO N-N	Non Clone- Non Clone	h8b4	10.158	149.983	99.509	301.379	16.43
Ctrl MO N-N	Non Clone- Non Clone	h8b4	10.158	138.447	95.812	301.106	16.43
Ctrl MO N-N	Non Clone- Non Clone	h8b4	10.158	125.647	94.288	223.269	16.43
Ctrl MO N-N	Non Clone- Non Clone	h8b4	10.158	115.697	90.68	185.901	16.43
Ctrl MO N-N	Non Clone- Non Clone
Ctrl MO N-N	Non Clone- Non Clone	h9b1	10.645	183.486	103.477	416.511	17.217
Ctrl MO N-N	Non Clone- Non Clone	h9b1	10.645	174.093	99.659	397.77	17.217
Ctrl MO N-N	Non Clone- Non Clone	h9b1	10.645	163.653	96.815	404.089	17.217
Ctrl MO N-N	Non Clone- Non Clone	h9b1	10.645	153.307	98.313	361.226	17.217
Ctrl MO N-N	Non Clone- Non Clone	h9b1	10.645	142.053	94.968	255.057	17.217
Ctrl MO N-N	Non Clone- Non Clone	h9b1	10.645	133.521	94.68	231.875	17.217
Ctrl MO N-N	Non Clone- Non Clone
Ctrl MO N-N	Non Clone- Non Clone	h9b2	7.349	246.61	123.774	524.201	11.861
Ctrl MO N-N	Non Clone- Non Clone	h9b2	7.349	219.715	102.964	518.244	11.861
Ctrl MO N-N	Non Clone- Non Clone	h9b2	7.349	192.124	110.265	414.473	11.861
Ctrl MO N-N	Non Clone- Non Clone	h9b2	7.349	169.656	101.419	340.955	11.861
Ctrl MO N-N	Non Clone- Non Clone
Ctrl MO N-N	Non Clone- Non Clone	h9b3	8.429	236.722	111.719	499.822	13.618
Ctrl MO N-N	Non Clone- Non Clone	h9b3	8.429	214.268	106.74	520.734	13.618
Ctrl MO N-N	Non Clone- Non Clone	h9b3	8.429	195.639	99.642	531.192	13.618
Ctrl MO N-N	Non Clone- Non Clone	h9b3	8.429	182.053	102.987	426.021	13.618
Ctrl MO N-N	Non Clone- Non Clone	h9b3	8.429	164.997	98.65	352.425	13.618
Ctrl MO N-N	Non Clone- Non Clone	h9b3	6.484	248.952	119.637	569.622	10.455
Ctrl MO N-N	Non Clone- Non Clone	h9b3	6.484	212.166	112.188	452.538	10.455
Ctrl MO N-N	Non Clone- Non Clone	h9b3	6.484	177.599	107.777	330.697	10.455
Ctrl MO N-N	Non Clone- Non Clone	h9b3	6.484	160.378	105.321	250.359	10.455
Ecad MO C-C	Clone- Clone	h5b1	7.781	536.949	217.35	1557.369	12.564
Ecad MO C-C	Clone- Clone	h5b1	7.781	526.553	204.507	1126.908	12.564
Ecad MO C-C	Clone- Clone	h5b1	7.781	526.307	214.705	1334.182	12.564
Ecad MO C-C	Clone- Clone	h5b1	7.781	523.416	231.677	1264.622	12.564
Ecad MO C-C	Clone- Clone	h5b1	7.781	498.859	238.804	1288.964	12.564
Ecad MO C-C	Clone- Clone	h5b1	7.781	463.226	216.485	1207.552	12.564
Ecad MO C-C	Clone- Clone	h5b1	7.781	419.752	170.831	1089.097	12.564
Ecad MO C-C	Clone- Clone	h5b1	7.781	351.052	171.274	853.233	12.564
Ecad MO C-C	Clone- Clone
Ecad MO C-C	Clone- Clone	h5b2	6.592	650.304	305.482	1593.555	10.631
Ecad MO C-C	Clone- Clone	h5b2	6.592	661.143	296.634	1357.834	10.631
Ecad MO C-C	Clone- Clone	h5b2	6.592	620.273	296.647	1094.415	10.631
Ecad MO C-C	Clone- Clone	h5b2	6.592	578.654	266.187	1022.188	10.631
Ecad MO C-C	Clone- Clone	h5b2	6.592	524.91	236.151	885.641	10.631
Ecad MO C-C	Clone- Clone	h5b2	6.592	451.535	205.665	766.958	10.631
Ecad MO C-C	Clone- Clone	h5b2	6.592	370.591	192.584	671.239	10.631
Ecad MO C-C	Clone- Clone
Ecad MO C-C	Clone- Clone	h5b3	4.539	1001.1	303.793	2840.504	7.292
Ecad MO C-C	Clone- Clone	h5b3	4.539	1061.095	334.72	2391.181	7.292
Ecad MO C-C	Clone- Clone	h5b3	4.539	1032.967	352.959	2054.217	7.292
Ecad MO C-C	Clone- Clone	h5b3	5.241	936.924	337.085	1700.05	8.434
Ecad MO C-C	Clone- Clone	h5b3	5.241	804.577	363.699	1732.107	8.434
Ecad MO C-C	Clone- Clone	h5b3	5.241	674.749	320.375	1462.66	8.434
Ecad MO C-C	Clone- Clone	h5b3	5.241	595.164	306.298	1390.856	8.434
Ecad MO C-C	Clone- Clone	h5b3	5.241	530.064	249.985	1278.049	8.434
Ecad MO C-C	Clone- Clone
Ecad MO C-C	Clone- Clone	h5b4	6.862	647.746	272.303	2325.497	11.07
Ecad MO C-C	Clone- Clone	h5b4	6.862	624.778	266.762	2677.965	11.07
Ecad MO C-C	Clone- Clone	h5b4	6.862	594.335	244.595	2307.786	11.07
Ecad MO C-C	Clone- Clone	h5b4	6.862	560.338	252.041	1697.621	11.07
Ecad MO C-C	Clone- Clone	h5b4	6.862	497.234	166.369	1476.431	11.07
Ecad MO C-C	Clone- Clone	h5b4	6.862	447.667	190.746	1249.31	11.07
Ecad MO C-C	Clone- Clone	h5b4	6.862	399.071	164.371	960.957	11.07
Ecad MO C-C	Clone- Clone	h5b4	6.862	346.361	142.878	934.274	11.07
Ecad MO C-C	Clone- Clone
Ecad MO C-C	Clone- Clone	h5b5	4.269	533.201	240.704	1096.749	6.853
Ecad MO C-C	Clone- Clone	h5b5	4.269	504.679	183.725	1014.81	6.853
Ecad MO C-C	Clone- Clone	h5b5	4.269	465.73	207.879	864.433	6.853
Ecad MO C-C	Clone- Clone	h5b5	4.269	413.09	207.13	707.345	6.853
Ecad MO C-C	Clone- Clone	h5b5	4.269	348.882	190.356	608.702	6.853
Ecad MO C-C	Clone- Clone	h5b5	4.269	301.658	178.754	511.394	6.853
Ecad MO C-C	Clone- Clone
Ecad MO C-C	Clone- Clone	h5b6	8.591	526.614	208.451	1841.919	13.882
Ecad MO C-C	Clone- Clone	h5b6	8.591	529.456	227.295	1594.356	13.882
Ecad MO C-C	Clone- Clone	h5b6	8.591	510.444	231.371	1244.385	13.882
Ecad MO C-C	Clone- Clone	h5b6	8.591	457.983	228.73	990.974	13.882
Ecad MO C-C	Clone- Clone	h5b6	8.591	404.872	193.736	860.928	13.882
Ecad MO C-C	Clone- Clone	h5b6	8.591	364.172	171.122	733.048	13.882
Ecad MO C-C	Clone- Clone	h5b6	8.591	314.821	140.409	573.064	13.882
Ecad MO C-C	Clone- Clone	h5b6	8.591	267.394	143.363	467.547	13.882
Ecad MO C-C	Clone- Clone
Ecad MO C-C	Clone- Clone	h5b7	9.618	500.176	210.98	1868.813	15.551
Ecad MO C-C	Clone- Clone	h5b7	9.618	463.572	167.558	1758.61	15.551
Ecad MO C-C	Clone- Clone	h5b7	11.725	481.108	166.067	2141.069	18.977
Ecad MO C-C	Clone- Clone	h5b7	11.401	493.371	194.802	1407.599	18.419
Ecad MO C-C	Clone- Clone	h5b7	11.401	463.515	177.829	1271.358	18.419
Ecad MO C-C	Clone- Clone	h5b7	11.401	425.603	186.299	1019.865	18.419
Ecad MO C-C	Clone- Clone	h5b7	11.401	385.757	155.097	840.789	18.419
Ecad MO C-C	Clone- Clone
Ecad MO C-C	Clone- Clone	h5b8	7.673	419.123	166.204	1016.839	12.388
Ecad MO C-C	Clone- Clone	h5b8	7.673	444.042	173.439	955.943	12.388
Ecad MO C-C	Clone- Clone	h5b8	7.673	451.089	171.254	945.318	12.388
Ecad MO C-C	Clone- Clone	h5b8	7.673	444.438	194.3	847.119	12.388
Ecad MO C-C	Clone- Clone	h5b8	7.673	426.304	179.113	843.505	12.388
Ecad MO C-C	Clone- Clone	h5b8	7.673	412.834	174.121	766.015	12.388
Ecad MO C-C	Clone- Clone	h5b8	7.673	390.528	181.295	715.547	12.388
Ecad MO C-C	Clone- Clone	h5b8	7.673	371.07	165.515	681.112	12.388
Ecad MO C-C	Clone- Clone
Ecad MO C-C	Clone- Clone	h5b9	9.24	600.965	205.941	1253.622	14.936
Ecad MO C-C	Clone- Clone	h5b9	9.24	583.741	179.246	1272.5	14.936
Ecad MO C-C	Clone- Clone	h5b9	9.24	555.382	260.22	1323.687	14.936
Ecad MO C-C	Clone- Clone	h5b9	9.24	529.028	185.344	1224.465	14.936
Ecad MO C-C	Clone- Clone	h5b9	9.24	492.495	251.512	1249.536	14.936
Ecad MO C-C	Clone- Clone	h5b9	9.24	444.592	208.799	868.687	14.936
Ecad MO C-C	Clone- Clone	h5b9	9.24	390.174	165.057	752.439	14.936
Ecad MO C-C	Clone- Clone
Ecad MO C-C	Clone- Clone	h5b10	10.483	642.556	245.106	1790.291	16.957
Ecad MO C-C	Clone- Clone	h5b10	10.483	679.579	252.173	2053.709	16.957
Ecad MO C-C	Clone- Clone	h5b10	10.483	672.802	264.735	2173.914	16.957
Ecad MO C-C	Clone- Clone	h5b10	10.483	633.027	246.741	2115.535	16.957
Ecad MO C-C	Clone- Clone	h5b10	9.672	713.148	272.131	2115.834	15.638
Ecad MO C-C	Clone- Clone	h5b10	9.672	632.342	225.285	1835.322	15.638
Ecad MO C-C	Clone- Clone	h5b10	9.672	573.781	228.016	1628.31	15.638
Ecad MO C-C	Clone- Clone	h5b10	9.672	511.841	189.278	1326.473	15.638
Ecad MO C-C	Clone- Clone	h5b10	9.672	436.929	175.128	985.358	15.638
Ecad MO C-C	Clone- Clone	h5b10	9.672	357.368	158.242	880.051	15.638
Ecad MO C-C	Clone- Clone
Ecad MO C-C	Clone- Clone	h5b11	10.266	885.553	291.749	2045.361	16.603
Ecad MO C-C	Clone- Clone	h5b11	10.266	810.896	306.708	2054.631	16.603
Ecad MO C-C	Clone- Clone	h5b11	7.241	877.165	321.716	1897.905	11.685
Ecad MO C-C	Clone- Clone	h5b11	7.241	809.209	264.924	1927.342	11.685
Ecad MO C-C	Clone- Clone	h5b11	7.241	739.143	306.66	1741.102	11.685
Ecad MO C-C	Clone- Clone	h5b11	7.241	652.391	281.086	1839.617	11.685
Ecad MO C-C	Clone- Clone	h5b11	7.241	591.605	244.596	1670.413	11.685
Ecad MO C-C	Clone- Clone	h5b11	7.241	538.837	234.009	1326.256	11.685
Ecad MO C-C	Clone- Clone	h5b11	7.241	469.974	212.227	1025.451	11.685
Ecad MO C-C	Clone- Clone
Ecad MO C-C	Clone- Clone	h5b12	6.484	780.741	281.46	1830.205	10.455
Ecad MO C-C	Clone- Clone	h5b12	6.484	727.269	296.382	1527.566	10.455
Ecad MO C-C	Clone- Clone	h5b12	6.484	649.834	258.267	1370.243	10.455
Ecad MO C-C	Clone- Clone	h5b12	6.484	568.54	233.974	1083.173	10.455
Ecad MO C-C	Clone- Clone	h5b12	6.484	510.67	246	1107.61	10.455
Ecad MO C-C	Clone- Clone	h5b12	6.484	462.55	215.76	1087.226	10.455
Ecad MO C-C	Clone- Clone	h5b12	6.484	425.962	182.621	1005.516	10.455
Ecad MO C-C	Clone- Clone	h5b12	6.484	391.667	181.899	819.097	10.455
Ecad MO C-C	Clone- Clone	h6b1	9.726	1064.923	380.62	2724.8	15.727
Ecad MO C-C	Clone- Clone	h6b1	9.726	1103.438	464.961	3374.794	15.727
Ecad MO C-C	Clone- Clone	h6b1	9.726	884.791	445.925	2181.321	15.727
Ecad MO C-C	Clone- Clone	h6b1	9.726	655.583	357.185	1381.934	15.727
Ecad MO C-C	Clone- Clone	h6b1	9.726	488.288	244.773	1023.487	15.727
Ecad MO C-C	Clone- Clone
Ecad MO C-C	Clone- Clone	h6b2	9.942	1006.225	322.638	2395.664	16.078
Ecad MO C-C	Clone- Clone	h6b2	9.942	867.525	311.462	2320.347	16.078
Ecad MO C-C	Clone- Clone	h6b2	9.942	615.002	246.239	1511.272	16.078
Ecad MO C-C	Clone- Clone	h6b2	9.942	395.158	153.265	927.607	16.078
Ecad MO C-C	Clone- Clone	h6b2	9.942	315.015	141.504	771.557	16.078
Ecad MO C-C	Clone- Clone
Ecad MO C-C	Clone- Clone	h6b3	6.646	1444.466	684.207	3420.74	10.719
Ecad MO C-C	Clone- Clone	h6b3	6.646	1344.483	616.719	3235.296	10.719
Ecad MO C-C	Clone- Clone	h6b3	6.646	916.833	369.591	2217.648	10.719
Ecad MO C-C	Clone- Clone	h6b3	6.538	964.459	394.467	2314.462	10.543
Ecad MO C-C	Clone- Clone	h6b3	6.538	684.994	304.312	1507.823	10.543
Ecad MO C-C	Clone- Clone	h6b3	6.538	485.194	217.794	836.827	10.543
Ecad MO C-C	Clone- Clone
Ecad MO C-C	Clone- Clone	h6b4	8.159	1268.319	554.201	2341.38	13.179
Ecad MO C-C	Clone- Clone	h6b4	8.159	1097.159	416.607	2359.824	13.179
Ecad MO C-C	Clone- Clone	h6b4	7.457	875.635	366.677	1930.033	12.037
Ecad MO C-C	Clone- Clone	h6b4	7.457	611.411	295.506	1095.798	12.037
Ecad MO C-C	Clone- Clone	h6b4	7.457	470.441	182.83	903.299	12.037
Ecad MO C-C	Clone- Clone
Ecad MO C-C	Clone- Clone	h6b5	8.375	1049.452	402.332	2409.31	13.527
Ecad MO C-C	Clone- Clone	h6b5	8.375	916.376	315.635	1787.329	13.527
Ecad MO C-C	Clone- Clone	h6b5	8.375	604.802	248.417	1246.451	13.527
Ecad MO C-C	Clone- Clone	h6b5	8.375	428.497	197.979	913.969	13.527
Ecad MO C-C	Clone- Clone
Ecad MO C-C	Clone- Clone	h6b6	7.997	1125.472	428.056	2280.798	12.915
Ecad MO C-C	Clone- Clone	h6b6	7.997	950.704	410.209	2254.126	12.915
Ecad MO C-C	Clone- Clone	h6b6	7.997	613.133	264.984	1856.147	12.915
Ecad MO C-C	Clone- Clone	h6b6	7.997	439.126	186.461	1085.04	12.915
Ecad MO C-C	Clone- Clone	h6b6	7.997	357.36	127.05	1067.768	12.915
Ecad MO C-C	Clone- Clone	h7b1	15.346	921.112	367.341	2125.711	24.864
Ecad MO C-C	Clone- Clone	h7b1	15.346	895.085	334.614	2245.703	24.864
Ecad MO C-C	Clone- Clone	h7b1	15.346	800.567	346.875	2253.164	24.864
Ecad MO C-C	Clone- Clone	h7b1	15.346	618.006	227.54	1625.803	24.864
Ecad MO C-C	Clone- Clone	h7b1	15.346	448.621	238.33	1118.986	24.864
Ecad MO C-C	Clone- Clone	h7b1	15.346	350.027	179.902	762.454	24.864
Ecad MO C-C	Clone- Clone
Ecad MO C-C	Clone- Clone	h7b2	8.105	819.428	304.88	2568.95	13.091
Ecad MO C-C	Clone- Clone	h7b2	8.105	765.598	287.207	2024.556	13.091
Ecad MO C-C	Clone- Clone	h7b2	8.105	646.131	258.434	1299.87	13.091
Ecad MO C-C	Clone- Clone	h7b2	8.105	467.555	195.887	949.402	13.091
Ecad MO C-C	Clone- Clone	h7b2	8.105	343.027	177.641	647.172	13.091
Ecad MO C-C	Clone- Clone	h7b2	8.105	283.12	138.334	510.644	13.091
Ecad MO C-C	Clone- Clone
Ecad MO C-C	Clone- Clone	h7b3	9.402	696.073	303.197	1318.925	15.199
Ecad MO C-C	Clone- Clone	h7b3	9.402	724.277	327.255	1514.869	15.199
Ecad MO C-C	Clone- Clone	h7b3	9.402	702.208	361.987	1370.363	15.199
Ecad MO C-C	Clone- Clone	h7b3	9.402	620.856	268.593	1483.549	15.199
Ecad MO C-C	Clone- Clone	h7b3	9.402	541.816	252.769	1300.347	15.199
Ecad MO C-C	Clone- Clone	h7b3	9.402	458.575	189.527	1207.39	15.199
Ecad MO C-C	Clone- Clone
Ecad MO C-C	Clone- Clone	h7b4	16.534	1015.705	402.47	2270.957	26.797
Ecad MO C-C	Clone- Clone	h7b4	16.534	938.073	399.079	2051.708	26.797
Ecad MO C-C	Clone- Clone	h7b4	16.534	809.631	304.635	1859.142	26.797
Ecad MO C-C	Clone- Clone	h7b4	16.534	639.052	245.185	1565.402	26.797
Ecad MO C-C	Clone- Clone	h7b4	16.534	492.111	213.86	1460.695	26.797
Ecad MO C-C	Clone- Clone	h7b4	16.534	397.779	184.876	1209.858	26.797
Ecad MO C-C	Clone- Clone	h7b4	16.534	325.993	165.104	1072.95	26.797
Ecad MO C-C	Clone- Clone
Ecad MO C-C	Clone- Clone	h7b5	3.836	729.703	296.045	1844.088	6.15
Ecad MO C-C	Clone- Clone	h7b5	3.836	731.865	301.43	1789.724	6.15
Ecad MO C-C	Clone- Clone	h7b5	3.836	644.191	289.562	1464.86	6.15
Ecad MO C-C	Clone- Clone	h7b5	3.836	471.262	252.073	944.208	6.15
Ecad MO C-C	Clone- Clone	h7b5	3.836	367.675	197.162	735.183	6.15
Ecad MO C-C	Clone- Clone	h7b5	3.836	307.27	129.225	514.797	6.15
Ecad MO C-C	Clone- Clone
Ecad MO C-C	Clone- Clone	h7b6	8.591	852.278	309.438	1977.793	13.879
Ecad MO C-C	Clone- Clone	h7b6	8.591	818.751	319.005	2051.935	13.879
Ecad MO C-C	Clone- Clone	h7b6	8.591	694.88	230.237	1327.125	13.879
Ecad MO C-C	Clone- Clone	h7b6	8.591	525.313	223.057	1007.323	13.879
Ecad MO C-C	Clone- Clone	h7b6	8.591	408.687	195.186	737.804	13.879
Ecad MO C-C	Clone- Clone	h7b6	8.591	327.794	152.341	575.518	13.879
Ecad MO C-C	Clone- Clone	h7b6	8.591	267.078	134.287	423.619	13.879
Ecad MO C-C	Clone- Clone
Ecad MO C-C	Clone- Clone	h7b7	7.133	995.824	405.24	2276.836	11.509
Ecad MO C-C	Clone- Clone	h7b7	7.133	892.51	355.265	2284.242	11.509
Ecad MO C-C	Clone- Clone	h7b7	7.133	741.644	311.425	2151.838	11.509
Ecad MO C-C	Clone- Clone	h7b7	7.133	574.943	261.9	1694.641	11.509
Ecad MO C-C	Clone- Clone	h7b7	7.133	415.299	198.642	1136.167	11.509
Ecad MO C-C	Clone- Clone
Ecad MO C-C	Clone- Clone	h7b8	7.295	955.191	364.286	2024.936	11.773
Ecad MO C-C	Clone- Clone	h7b8	7.295	942.24	451.764	1912.099	11.773
Ecad MO C-C	Clone- Clone	h7b8	7.295	824.057	395.978	1979.215	11.773
Ecad MO C-C	Clone- Clone	h7b8	7.295	659.875	243.732	1341.386	11.773
Ecad MO C-C	Clone- Clone	h7b8	7.295	477.941	249.734	921.552	11.773
Ecad MO C-C	Clone- Clone	h7b8	7.295	348.865	186.116	549.062	11.773
Ecad MO C-C	Clone- Clone	h7b8	7.295	289.68	156.91	480.793	11.773
Ecad MO C-C	Clone- Clone
Ecad MO C-C	Clone- Clone	h7b9	11.347	663.605	281.728	1382.536	18.362
Ecad MO C-C	Clone- Clone	h7b9	11.347	655.958	321.795	1448.567	18.362
Ecad MO C-C	Clone- Clone	h7b9	11.347	595.646	258.935	1318.457	18.362
Ecad MO C-C	Clone- Clone	h7b9	11.347	525.192	232.45	1537.018	18.362
Ecad MO C-C	Clone- Clone	h7b9	11.347	448.855	190.852	1406.008	18.362
Ecad MO C-C	Clone- Clone	h7b9	11.347	379.008	157.205	1134.863	18.362
Ecad MO C-C	Clone- Clone	h7b9	11.347	299.039	130.676	770.72	18.362
Ecad MO C-C	Clone- Clone
Ecad MO C-C	Clone- Clone	h7b10	13.671	932.195	469.85	1735.769	22.14
Ecad MO C-C	Clone- Clone	h7b10	13.671	834.224	417.115	1599.272	22.14
Ecad MO C-C	Clone- Clone	h7b10	13.671	710.617	260.31	1476.976	22.14
Ecad MO C-C	Clone- Clone	h7b10	13.238	762.379	374.755	1498.745	21.437
Ecad MO C-C	Clone- Clone	h7b10	13.238	639.382	295.108	1542.807	21.437
Ecad MO C-C	Clone- Clone	h7b10	13.238	516.366	223.925	1433.785	21.437
Ecad MO C-C	Clone- Clone	h7b10	13.238	420.671	175.339	1244.57	21.437
Ecad MO C-C	Clone- Clone	h7b10	13.238	335.285	134.225	1063.173	21.437
Ecad MO C-C	Clone- Clone
Ecad MO C-C	Clone- Clone	h7b11	6.7	1126.975	492.558	2285.288	10.806
Ecad MO C-C	Clone- Clone	h7b11	6.7	1031.077	436.63	2202.783	10.806
Ecad MO C-C	Clone- Clone	h7b11	6.7	874.186	394.07	1905.649	10.806
Ecad MO C-C	Clone- Clone	h7b11	6.7	638.173	335.933	1409.103	10.806
Ecad MO C-C	Clone- Clone	h7b11	6.7	463.581	254.432	785.569	10.806
Ecad MO C-C	Clone- Clone	h7b11	6.7	364.195	190.542	552.529	10.806
Ecad MO C-C	Clone- Clone
Ecad MO C-C	Clone- Clone	h7b12	13.671	488.49	146.737	1374.044	22.14
Ecad MO C-C	Clone- Clone	h7b12	13.671	508.79	191.404	1203.051	22.14
Ecad MO C-C	Clone- Clone	h7b12	13.671	523.61	197.898	1160.667	22.14
Ecad MO C-C	Clone- Clone	h7b12	13.671	502.4	178.399	1132.153	22.14
Ecad MO C-C	Clone- Clone	h7b12	13.671	431.402	136.816	1088.861	22.14
Ecad MO C-C	Clone- Clone	h8b1	11.725	526.195	232.054	1213.149	18.977
Ecad MO C-C	Clone- Clone	h8b1	11.725	582.855	216.11	1527.209	18.977
Ecad MO C-C	Clone- Clone	h8b1	11.725	574.745	245.247	1609.219	18.977
Ecad MO C-C	Clone- Clone	h8b1	11.725	525.18	207.838	1407.227	18.977
Ecad MO C-C	Clone- Clone	h8b1	11.725	449.582	165.856	1044.946	18.977
Ecad MO C-C	Clone- Clone	h8b1	11.725	355.468	161.048	784.054	18.977
Ecad MO C-C	Clone- Clone	h8b1	11.725	271.157	144.004	511.435	18.977
Ecad MO C-C	Clone- Clone	h8b1	11.725	219.864	117.107	382.162	18.977
Ecad MO C-C	Clone- Clone
Ecad MO C-C	Clone- Clone	h8b2	9.564	528.652	182	1723.163	15.463
Ecad MO C-C	Clone- Clone	h8b2	9.564	532.525	164.249	1483.009	15.463
Ecad MO C-C	Clone- Clone	h8b2	9.564	500.106	166.81	1266.614	15.463
Ecad MO C-C	Clone- Clone	h8b2	9.564	409.835	182.597	902.512	15.463
Ecad MO C-C	Clone- Clone
Ecad MO C-C	Clone- Clone	h8b3	15.238	427.416	174.208	967.704	24.688
Ecad MO C-C	Clone- Clone	h8b3	15.238	423.523	143.047	1065.375	24.688
Ecad MO C-C	Clone- Clone	h8b3	15.238	387.087	184.396	955.935	24.688
Ecad MO C-C	Clone- Clone	h8b3	15.238	317.034	157.137	696.108	24.688
Ecad MO C-C	Clone- Clone	h8b3	13.455	349.798	132.401	1506.859	21.789
Ecad MO C-C	Clone- Clone	h8b3	13.455	293.411	114.741	1186.748	21.789
Ecad MO C-C	Clone- Clone	h8b3	13.455	239.773	110.286	724.465	21.789
Ecad MO C-C	Clone- Clone	h9b1	8.862	580.51	141.978	1483.438	14.321
Ecad MO C-C	Clone- Clone	h9b1	8.862	583.42	154.967	2102.54	14.321
Ecad MO C-C	Clone- Clone	h9b1	8.862	534.309	172.589	2304.898	14.321
Ecad MO C-C	Clone- Clone	h9b1	8.862	477.653	175.149	1895.494	14.321
Ecad MO C-C	Clone- Clone	h9b1	8.862	375.7	157.392	1231.082	14.321
Ecad MO C-C	Clone- Clone	h9b1	8.862	315.027	123.853	875.755	14.321
Ecad MO C-C	Clone- Clone	h9b1	8.862	259.239	124.791	572.951	14.321
Ecad MO C-C	Clone- Clone	h9b1	8.862	227.359	114.282	467.445	14.321
Ecad MO C-C	Clone- Clone
Ecad MO C-C	Clone- Clone	h9b2	10.321	310.203	115.115	791.004	16.693
Ecad MO C-C	Clone- Clone	h9b2	10.321	305.152	121.433	616.776	16.693
Ecad MO C-C	Clone- Clone	h9b2	10.321	291.05	114.627	698.488	16.693
Ecad MO C-C	Clone- Clone	h9b2	10.321	281.045	139.727	936.121	16.693
Ecad MO C-C	Clone- Clone	h9b2	10.321	276.316	123.006	1049.018	16.693
Ecad MO C-C	Clone- Clone	h9b2	10.321	272.406	114.332	895.465	16.693
Ecad MO C-C	Clone- Clone	h9b2	10.321	269.895	112.078	686.356	16.693
Ecad MO C-C	Clone- Clone	h9b2	10.321	269.895	112.078	686.356	16.693
Ecad MO C-C	Clone- Clone	h9b2	10.321	269.795	111.82	719.381	16.693
Ecad MO C-C	Clone- Clone
Ecad MO C-C	Clone- Clone	h9b3	8.862	321.968	121.74	1023.569	14.321
Ecad MO C-C	Clone- Clone	h9b3	8.862	319.357	137.53	1039.072	14.321
Ecad MO C-C	Clone- Clone	h9b3	8.862	307.421	141.882	817.92	14.321
Ecad MO C-C	Clone- Clone	h9b3	8.862	289.986	155.724	648.582	14.321
Ecad MO C-C	Clone- Clone	h9b3	8.862	264.871	130.284	515.936	14.321
Ecad MO C-C	Clone- Clone	h9b3	8.862	241.155	129.828	587.708	14.321
Ecad MO C-C	Clone- Clone
Ecad MO C-C	Clone- Clone	h9b4	4.701	261.414	125.172	614.128	7.556
Ecad MO C-C	Clone- Clone	h9b4	4.701	254.452	134.979	475.943	7.556
Ecad MO C-C	Clone- Clone	h9b4	4.701	249.678	133.597	484.994	7.556
Ecad MO C-C	Clone- Clone	h9b4	4.701	243.41	117.115	494.828	7.556
Ecad MO C-C	Clone- Clone	h9b4	4.701	226.624	113.007	419.902	7.556
Ecad MO C-C	Clone- Clone	h9b4	4.701	217.704	119.998	404.515	7.556
Ecad MO C-C	Clone- Clone	h9b4	4.701	202.518	119.896	413.115	7.556
Ecad MO C-C	Clone- Clone	h9b4	4.701	181.071	104.348	371.598	7.556
Ecad MO C-C	Clone- Clone
Ecad MO C-C	Clone- Clone	h9b5	7.889	361.212	149.644	1368.677	12.739
Ecad MO C-C	Clone- Clone	h9b5	7.889	353.801	134.713	830.373	12.739
Ecad MO C-C	Clone- Clone	h9b5	7.889	337.773	133.491	786.772	12.739
Ecad MO C-C	Clone- Clone	h9b5	7.889	315.826	137.298	716.334	12.739
Ecad MO C-C	Clone- Clone	h9b5	7.889	292.702	129.37	651.301	12.739
Ecad MO C-C	Clone- Clone	h9b5	7.889	274.069	117.018	527.13	12.739
Ecad MO C-C	Clone- Clone	h9b5	7.889	250.518	119.451	500.653	12.739
Ecad MO C-C	Clone- Clone
Ecad MO C-C	Clone- Clone	h9b6	10.104	333.949	158.942	866.013	16.342
Ecad MO C-C	Clone- Clone	h9b6	10.104	353.641	139.456	1073.329	16.342
Ecad MO C-C	Clone- Clone	h9b6	10.104	357.734	153.516	1263.808	16.342
Ecad MO C-C	Clone- Clone	h9b6	10.104	344.032	139.04	1379.101	16.342
Ecad MO C-C	Clone- Clone	h9b6	10.104	323.034	137.241	1320.456	16.342
Ecad MO C-C	Clone- Clone	h9b6	10.104	301.399	124.84	1002.162	16.342
Ecad MO C-C	Clone- Clone	h9b6	10.104	273.255	127.774	766.829	16.342
Ecad MO C-C	Clone- Clone
Ecad MO C-C	Clone- Clone	h9b7	10.05	394.04	156.188	890.2	16.254
Ecad MO C-C	Clone- Clone	h9b7	10.05	350.211	152.497	758.953	16.254
Ecad MO C-C	Clone- Clone	h9b7	10.05	309.307	149.287	598.467	16.254
Ecad MO C-C	Clone- Clone	h9b7	10.05	264.133	132.009	527.684	16.254
Ecad MO C-C	Clone- Clone	h9b7	10.05	221.335	108.7	475.774	16.254
Ecad MO C-C	Clone- Clone	h9b7	10.05	188.96	115.448	401.765	16.254
Ecad MO C-C	Clone- Clone
Ecad MO C-C	Clone- Clone	h9b8	4.053	323.307	168.468	721.498	6.502
Ecad MO C-C	Clone- Clone	h9b8	4.053	270.23	153.945	602.181	6.502
Ecad MO C-C	Clone- Clone	h9b8	4.053	226.098	129.582	460.83	6.502
Ecad MO C-C	Clone- Clone	h9b8	4.053	193.47	121.877	337.015	6.502
Ecad MO C-C	Clone- Clone	h9b8	4.053	174.898	101.147	289.859	6.502
Ecad MO N-C	Non Clone- Clone	h5b1	10.266	632.92	219.915	1225.915	16.605
Ecad MO N-C	Non Clone- Clone	h5b1	10.266	584.692	201.808	1233.503	16.605
Ecad MO N-C	Non Clone- Clone	h5b1	10.266	523.93	222.642	972.94	16.605
Ecad MO N-C	Non Clone- Clone	h5b1	10.266	478.118	190.723	875.458	16.605
Ecad MO N-C	Non Clone- Clone	h5b1	10.266	402.985	173.235	829.683	16.605
Ecad MO N-C	Non Clone- Clone	h5b1	10.266	335.565	167.529	662.08	16.605
Ecad MO N-C	Non Clone- Clone	h5b1	10.266	284.507	147.835	559.591	16.605
Ecad MO N-C	Non Clone- Clone
Ecad MO N-C	Non Clone- Clone	h5b2	7.619	594.105	248.519	1124.057	12.3
Ecad MO N-C	Non Clone- Clone	h5b2	7.619	525.716	243.08	983.279	12.3
Ecad MO N-C	Non Clone- Clone	h5b2	7.619	466.963	241.995	908.849	12.3
Ecad MO N-C	Non Clone- Clone	h5b2	7.619	405.175	189.112	891.229	12.3
Ecad MO N-C	Non Clone- Clone
Ecad MO N-C	Non Clone- Clone	h5b3	10.861	696.185	207.378	3496.168	17.572
Ecad MO N-C	Non Clone- Clone	h5b3	10.861	693.543	243.495	3551.189	17.572
Ecad MO N-C	Non Clone- Clone	h5b3	10.861	669.876	245.208	2697.844	17.572
Ecad MO N-C	Non Clone- Clone	h5b3	10.861	637.84	259.443	1787.362	17.572
Ecad MO N-C	Non Clone- Clone	h5b3	10.861	590.263	246.522	1590.076	17.572
Ecad MO N-C	Non Clone- Clone	h5b3	10.861	550.822	216.883	1586.189	17.572
Ecad MO N-C	Non Clone- Clone	h5b3	10.861	526.224	216.986	1410.518	17.572
Ecad MO N-C	Non Clone- Clone	h5b3	10.861	480.34	194.626	1128.837	17.572
Ecad MO N-C	Non Clone- Clone	h5b3	10.861	435.279	165.596	1070.499	17.572
Ecad MO N-C	Non Clone- Clone
Ecad MO N-C	Non Clone- Clone	h5b4	7.511	594.658	169.06	1649.169	12.125
Ecad MO N-C	Non Clone- Clone	h5b4	7.511	560.79	186.754	1292.733	12.125
Ecad MO N-C	Non Clone- Clone	h5b4	7.511	519.826	174.19	1313.783	12.125
Ecad MO N-C	Non Clone- Clone	h5b4	7.511	486.471	179.684	1025.069	12.125
Ecad MO N-C	Non Clone- Clone	h5b4	7.511	442.803	180.954	960.108	12.125
Ecad MO N-C	Non Clone- Clone	h5b4	7.511	392.904	184.101	919.216	12.125
Ecad MO N-C	Non Clone- Clone	h5b4	7.511	348.863	159.278	725.917	12.125
Ecad MO N-C	Non Clone- Clone	h5b4	7.511	319.203	153.508	761.439	12.125
Ecad MO N-C	Non Clone- Clone	h5b4	7.511	273.839	130.077	729.178	12.125
Ecad MO N-C	Non Clone- Clone
Ecad MO N-C	Non Clone- Clone	h5b5	7.457	805.997	270.13	2557.121	12.037
Ecad MO N-C	Non Clone- Clone	h5b5	7.457	825.644	302.94	2058.274	12.037
Ecad MO N-C	Non Clone- Clone	h5b5	7.457	786.673	273.497	1574.189	12.037
Ecad MO N-C	Non Clone- Clone	h5b5	7.457	705.819	298.488	1458.863	12.037
Ecad MO N-C	Non Clone- Clone	h5b5	7.457	613.653	284.866	1245.366	12.037
Ecad MO N-C	Non Clone- Clone	h5b5	7.457	549.044	274.613	1068.178	12.037
Ecad MO N-C	Non Clone- Clone	h5b5	7.457	500.506	259.637	1012.676	12.037
Ecad MO N-C	Non Clone- Clone	h6b1	9.402	1257.281	497.532	2780.464	15.171
Ecad MO N-C	Non Clone- Clone	h6b1	9.402	1285.988	430.992	2892.171	15.171
Ecad MO N-C	Non Clone- Clone	h6b1	9.402	1069.974	437.127	2547.466	15.171
Ecad MO N-C	Non Clone- Clone	h6b1	9.402	784.113	306.516	1386.593	15.171
Ecad MO N-C	Non Clone- Clone	h6b1	9.402	649.376	345.304	1104.547	15.171
Ecad MO N-C	Non Clone- Clone
Ecad MO N-C	Non Clone- Clone	h6b2	11.347	1105.036	478.304	2588.564	18.362
Ecad MO N-C	Non Clone- Clone	h6b2	11.347	907.953	409.273	2126.351	18.362
Ecad MO N-C	Non Clone- Clone	h6b2	11.347	662.99	358.586	1267.895	18.362
Ecad MO N-C	Non Clone- Clone	h6b2	11.347	508.028	243.401	1007.01	18.362
Ecad MO N-C	Non Clone- Clone	h6b2	11.347	420.104	165.628	819.434	18.362
Ecad MO N-C	Non Clone- Clone
Ecad MO N-C	Non Clone- Clone	h6b3	11.563	772.933	343.762	1844.758	18.714
Ecad MO N-C	Non Clone- Clone	h6b3	11.563	766.599	379.418	1574.268	18.714
Ecad MO N-C	Non Clone- Clone	h6b3	11.563	595.409	277.127	1298.878	18.714
Ecad MO N-C	Non Clone- Clone	h6b3	11.563	406.892	148.2	1151.112	18.714
Ecad MO N-C	Non Clone- Clone	h6b3	11.563	326.476	159.877	1082.265	18.714
Ecad MO N-C	Non Clone- Clone	h7b1	8.7	1009.584	397.945	1789.648	14.057
Ecad MO N-C	Non Clone- Clone	h7b1	8.7	930.394	379.641	1740.827	14.057
Ecad MO N-C	Non Clone- Clone	h7b1	8.7	799.658	262.658	1682.061	14.057
Ecad MO N-C	Non Clone- Clone	h7b1	8.7	621.13	225.687	1541.423	14.057
Ecad MO N-C	Non Clone- Clone	h7b1	8.7	453.392	162.564	1080.424	14.057
Ecad MO N-C	Non Clone- Clone	h7b1	8.7	352.736	110.737	780.232	14.057
Ecad MO N-C	Non Clone- Clone
Ecad MO N-C	Non Clone- Clone	h7b2	10.807	832.484	384.23	1649.512	17.484
Ecad MO N-C	Non Clone- Clone	h7b2	10.807	734.483	266.844	1537.133	17.484
Ecad MO N-C	Non Clone- Clone	h7b2	10.807	628.997	233.079	1472.154	17.484
Ecad MO N-C	Non Clone- Clone	h7b2	10.807	514.643	204.397	1523.675	17.484
Ecad MO N-C	Non Clone- Clone	h7b2	10.807	385.254	162.685	970.913	17.484
Ecad MO N-C	Non Clone- Clone	h7b2	10.807	299.733	133.638	623.248	17.484
Ecad MO N-C	Non Clone- Clone	h7b2	10.807	262.176	120.849	512.326	17.484
Ecad MO N-C	Non Clone- Clone
Ecad MO N-C	Non Clone- Clone	h7b3	8.97	682.811	306.976	1233.574	14.494
Ecad MO N-C	Non Clone- Clone	h7b3	8.97	588.214	285.131	1197.384	14.494
Ecad MO N-C	Non Clone- Clone	h7b3	8.97	481.67	255.171	908.937	14.494
Ecad MO N-C	Non Clone- Clone	h7b3	8.97	355.933	196.616	674.815	14.494
Ecad MO N-C	Non Clone- Clone	h7b3	8.97	279.756	151.309	560.751	14.494
Ecad MO N-C	Non Clone- Clone	h7b3	8.97	239.274	148.348	451.065	14.494
Ecad MO N-C	Non Clone- Clone
Ecad MO N-C	Non Clone- Clone	h7b4	3.89	895.896	480.738	1757.694	6.238
Ecad MO N-C	Non Clone- Clone	h7b4	3.89	866.539	399.487	1547.288	6.238
Ecad MO N-C	Non Clone- Clone	h7b4	3.89	762.322	426.936	1509.138	6.238
Ecad MO N-C	Non Clone- Clone	h7b4	3.89	604.557	303.167	1304.937	6.238
Ecad MO N-C	Non Clone- Clone	h7b4	3.89	456.069	238.345	796.583	6.238
Ecad MO N-C	Non Clone- Clone	h7b4	3.89	355.074	184.366	578.519	6.238
Ecad MO N-C	Non Clone- Clone	h7b4	3.89	286.454	157.98	458.411	6.238
Ecad MO N-C	Non Clone- Clone
Ecad MO N-C	Non Clone- Clone	h7b5	7.727	911.808	395.754	1880.317	12.476
Ecad MO N-C	Non Clone- Clone	h7b5	7.727	766.909	306.21	1596.783	12.476
Ecad MO N-C	Non Clone- Clone	h7b5	7.727	577.626	260.1	1387.983	12.476
Ecad MO N-C	Non Clone- Clone	h7b5	7.727	439.543	191.655	889.895	12.476
Ecad MO N-C	Non Clone- Clone	h7b5	7.727	373.975	180.989	655.68	12.476
Ecad MO N-C	Non Clone- Clone	h7b5	7.727	323.808	169.628	539.39	12.476
Ecad MO N-C	Non Clone- Clone
Ecad MO N-C	Non Clone- Clone	h7b6	9.024	944.785	399.471	2134.657	14.585
Ecad MO N-C	Non Clone- Clone	h7b6	9.024	768.339	296.021	2050.02	14.585
Ecad MO N-C	Non Clone- Clone	h7b6	9.024	635.625	237.931	1507.898	14.585
Ecad MO N-C	Non Clone- Clone	h7b6	9.024	510.275	198.153	1094.027	14.585
Ecad MO N-C	Non Clone- Clone	h7b6	9.024	402.921	179.645	846.919	14.585
Ecad MO N-C	Non Clone- Clone	h7b6	9.024	310.071	148.866	520.44	14.585
Ecad MO N-C	Non Clone- Clone	h7b6	9.024	264.709	138.679	442.987	14.585
Ecad MO N-C	Non Clone- Clone	h8b1	4.863	743.948	245.394	2200.579	7.819
Ecad MO N-C	Non Clone- Clone	h8b1	4.863	637.418	263.686	1943.565	7.819
Ecad MO N-C	Non Clone- Clone	h8b1	4.863	541.496	248.749	1638.748	7.819
Ecad MO N-C	Non Clone- Clone	h8b1	4.863	437.814	182.452	1295.988	7.819
Ecad MO N-C	Non Clone- Clone	h8b1	4.863	333.243	148.809	649.481	7.819
Ecad MO N-C	Non Clone- Clone	h8b1	4.863	252.002	118.752	414.411	7.819
Ecad MO N-C	Non Clone- Clone
Ecad MO N-C	Non Clone- Clone	h8b2	12.158	294.698	123.504	773.227	19.68
Ecad MO N-C	Non Clone- Clone	h8b2	12.158	278.316	135.481	832.844	19.68
Ecad MO N-C	Non Clone- Clone	h8b2	12.158	249.341	119.277	655.95	19.68
Ecad MO N-C	Non Clone- Clone	h8b2	12.158	223.651	101.87	584.589	19.68
Ecad MO N-C	Non Clone- Clone	h8b2	12.158	194.929	99.382	414.982	19.68
Ecad MO N-C	Non Clone- Clone
Ecad MO N-C	Non Clone- Clone	h8b3	10.104	394.081	166.276	952.198	16.342
Ecad MO N-C	Non Clone- Clone	h8b3	10.104	383.602	156.151	765.288	16.342
Ecad MO N-C	Non Clone- Clone	h8b3	10.104	357.314	143.437	705.631	16.342
Ecad MO N-C	Non Clone- Clone	h8b3	10.104	307.012	140.175	643.565	16.342
Ecad MO N-C	Non Clone- Clone	h8b3	10.104	256.684	130.726	490.731	16.342
Ecad MO N-C	Non Clone- Clone	h8b3	10.104	217.755	113.278	424.223	16.342
Ecad MO N-C	Non Clone- Clone
Ecad MO N-C	Non Clone- Clone	h8b4	15.508	286.679	123.522	779.008	25.128
Ecad MO N-C	Non Clone- Clone	h8b4	15.508	261.215	107.553	887.423	25.128
Ecad MO N-C	Non Clone- Clone	h8b4	15.508	236.662	98.196	849.321	25.128
Ecad MO N-C	Non Clone- Clone	h8b4	15.508	208.84	100.378	537.477	25.128
Ecad MO N-C	Non Clone- Clone
Ecad MO N-C	Non Clone- Clone	h9b1	6.268	324.208	165.952	779.432	10.104
Ecad MO N-C	Non Clone- Clone	h9b1	6.268	275.114	155.499	550.365	10.104
Ecad MO N-C	Non Clone- Clone	h9b1	6.268	241.771	122.896	418.086	10.104
Ecad MO N-C	Non Clone- Clone	h9b1	6.268	221.202	128.598	392.785	10.104
Ecad MO N-C	Non Clone- Clone	h9b1	6.268	201.204	124.136	372.265	10.104
Ecad MO N-C	Non Clone- Clone	h9b1	6.268	177.592	113.765	353.658	10.104
Ecad MO N-C	Non Clone- Clone
Ecad MO N-C	Non Clone- Clone	h9b2	7.078	274.485	116.58	607.909	11.422
Ecad MO N-C	Non Clone- Clone	h9b2	7.078	239.059	119.097	557.351	11.422
Ecad MO N-C	Non Clone- Clone	h9b2	7.078	202.573	116.037	382.302	11.422
Ecad MO N-C	Non Clone- Clone	h9b2	7.078	179.958	113.824	294.35	11.422
Ecad MO N-C	Non Clone- Clone	h9b2	7.078	162.154	103.043	272.63	11.422
Ecad MO N-C	Non Clone- Clone	h9b2	7.078	150.916	103.703	266.773	11.422
Ecad MO N-C	Non Clone- Clone
Ecad MO N-C	Non Clone- Clone	h9b3	9.618	191.226	105.272	427.487	15.551
Ecad MO N-C	Non Clone- Clone	h9b3	9.618	175.577	105.04	342.944	15.551
Ecad MO N-C	Non Clone- Clone	h9b3	9.618	162.444	103.918	268.716	15.551
Ecad MO N-C	Non Clone- Clone	h9b3	9.618	151.724	104.39	251.085	15.551
Ecad MO N-C	Non Clone- Clone	h9b3	9.618	141.676	94.93	246.294	15.551
Ecad MO N-C	Non Clone- Clone
Ecad MO N-C	Non Clone- Clone	h9b4	7.403	280.892	125.282	743.956	11.902
Ecad MO N-C	Non Clone- Clone	h9b4	7.403	240.005	115.234	451.068	11.902
Ecad MO N-C	Non Clone- Clone	h9b4	7.403	208.379	121.327	425.897	11.902
Ecad MO N-C	Non Clone- Clone	h9b4	7.403	189.248	108.783	381.701	11.902
Ecad MO N-C	Non Clone- Clone	h9b4	7.403	175.212	102.421	395.481	11.902
Ecad MO N-C	Non Clone- Clone	h9b4	7.403	167.088	102.182	373.39	11.902
Ecad MO N-C	Non Clone- Clone
Ecad MO N-C	Non Clone- Clone	h9b5	11.833	300.179	137.646	692.764	19.153
Ecad MO N-C	Non Clone- Clone	h9b5	11.833	267.737	132.719	608.065	19.153
Ecad MO N-C	Non Clone- Clone	h9b5	11.833	237.823	120.309	574.029	19.153
Ecad MO N-C	Non Clone- Clone	h9b5	11.833	199.747	112.804	470.542	19.153
Ecad MO N-C	Non Clone- Clone
Ecad MO N-C	Non Clone- Clone	h9b6	6.484	231.35	107.704	467.076	10.455
Ecad MO N-C	Non Clone- Clone	h9b6	6.484	211.834	104.434	439.402	10.455
Ecad MO N-C	Non Clone- Clone	h9b6	6.484	196.399	106.253	451.659	10.455
Ecad MO N-C	Non Clone- Clone	h9b6	6.484	178.156	103.163	432.868	10.455
Ecad MO N-C	Non Clone- Clone	h9b6	6.484	164.38	93.721	377.4	10.455
Ecad MO N-C	Non Clone- Clone
Ecad MO N-C	Non Clone- Clone	h9b7	7.024	232.337	115.335	451.206	11.334
Ecad MO N-C	Non Clone- Clone	h9b7	7.024	218.258	119.989	420.516	11.334
Ecad MO N-C	Non Clone- Clone	h9b7	7.024	203.019	114.575	401.282	11.334
Ecad MO N-C	Non Clone- Clone	h9b7	7.024	187.922	110.699	390.157	11.334
Ecad MO N-N	Non Clone- Non Clone	h5b1	10.861	541.753	188.348	1484.839	17.572
Ecad MO N-N	Non Clone- Non Clone	h5b1	10.861	535.043	202.493	1074.329	17.572
Ecad MO N-N	Non Clone- Non Clone	h5b1	10.861	514.581	193.549	1054.196	17.572
Ecad MO N-N	Non Clone- Non Clone	h5b1	10.861	487.734	229.963	1005.904	17.572
Ecad MO N-N	Non Clone- Non Clone	h5b1	10.861	449.922	225.638	921.169	17.572
Ecad MO N-N	Non Clone- Non Clone	h5b1	10.861	409.046	172.929	806.388	17.572
Ecad MO N-N	Non Clone- Non Clone	h5b1	10.861	366.181	167.198	769.38	17.572
Ecad MO N-N	Non Clone- Non Clone	h5b1	10.861	325.522	153.997	631.444	17.572
Ecad MO N-N	Non Clone- Non Clone	h5b1	10.861	272.601	142.6	521.594	17.572
Ecad MO N-N	Non Clone- Non Clone
Ecad MO N-N	Non Clone- Non Clone	h5b2	6.646	539.871	238.154	1026.49	10.719
Ecad MO N-N	Non Clone- Non Clone	h5b2	6.646	505.571	225.236	969.679	10.719
Ecad MO N-N	Non Clone- Non Clone	h5b2	6.646	469.909	173.948	903.194	10.719
Ecad MO N-N	Non Clone- Non Clone	h5b2	6.646	423.598	177.2	893.576	10.719
Ecad MO N-N	Non Clone- Non Clone	h5b2	6.646	380.709	171.471	841.403	10.719
Ecad MO N-N	Non Clone- Non Clone	h5b2	6.646	349.932	135.66	786.65	10.719
Ecad MO N-N	Non Clone- Non Clone	h5b2	6.646	301.021	144.699	777.592	10.719
Ecad MO N-N	Non Clone- Non Clone
Ecad MO N-N	Non Clone- Non Clone	h5b3	8.105	395.217	148.317	1062.86	13.084
Ecad MO N-N	Non Clone- Non Clone	h5b3	8.105	373.048	143.485	1032.671	13.084
Ecad MO N-N	Non Clone- Non Clone	h5b3	8.105	342.991	121.957	941.866	13.084
Ecad MO N-N	Non Clone- Non Clone	h5b3	8.105	305.541	118.827	847.668	13.084
Ecad MO N-N	Non Clone- Non Clone	h5b3	8.105	269.796	119.462	642.911	13.084
Ecad MO N-N	Non Clone- Non Clone
Ecad MO N-N	Non Clone- Non Clone	h5b4	8.267	420.993	192.27	745.533	13.354
Ecad MO N-N	Non Clone- Non Clone	h5b4	8.267	404.027	173.893	742.914	13.354
Ecad MO N-N	Non Clone- Non Clone	h5b4	8.267	385.211	149.454	735.908	13.354
Ecad MO N-N	Non Clone- Non Clone	h5b4	8.267	357.304	155.919	656.58	13.354
Ecad MO N-N	Non Clone- Non Clone	h5b4	8.267	321.389	152.429	602.427	13.354
Ecad MO N-N	Non Clone- Non Clone	h5b4	8.267	280.711	158.861	558.715	13.354
Ecad MO N-N	Non Clone- Non Clone	h5b4	8.267	235.224	118.905	495.74	13.354
Ecad MO N-N	Non Clone- Non Clone
Ecad MO N-N	Non Clone- Non Clone	h5b5	8.591	441.961	155.393	841.894	13.882
Ecad MO N-N	Non Clone- Non Clone	h5b5	8.591	430.045	166.264	874.101	13.882
Ecad MO N-N	Non Clone- Non Clone	h5b5	8.591	406.81	188.752	748.301	13.882
Ecad MO N-N	Non Clone- Non Clone	h5b5	8.591	390.939	207.612	740.264	13.882
Ecad MO N-N	Non Clone- Non Clone	h5b5	8.591	355.701	186.06	620.075	13.882
Ecad MO N-N	Non Clone- Non Clone	h5b5	8.591	315.315	152.827	634.104	13.882
Ecad MO N-N	Non Clone- Non Clone
Ecad MO N-N	Non Clone- Non Clone	h5b6	4.701	326.062	0	650.587	7.556
Ecad MO N-N	Non Clone- Non Clone	h5b6	4.701	334.719	0	660.103	7.556
Ecad MO N-N	Non Clone- Non Clone	h5b6	4.701	338.656	0	658.457	7.556
Ecad MO N-N	Non Clone- Non Clone	h5b6	4.701	329.831	0	629.551	7.556
Ecad MO N-N	Non Clone- Non Clone	h5b6	4.701	310.316	0	678.512	7.556
Ecad MO N-N	Non Clone- Non Clone	h5b6	4.701	291.102	0	664.477	7.556
Ecad MO N-N	Non Clone- Non Clone
Ecad MO N-N	Non Clone- Non Clone
Ecad MO N-N	Non Clone- Non Clone
Ecad MO N-N	Non Clone- Non Clone
Ecad MO N-N	Non Clone- Non Clone
Ecad MO N-N	Non Clone- Non Clone
Ecad MO N-N	Non Clone- Non Clone	h6b1	12.104	1128.559	513.534	2143.057	19.592
Ecad MO N-N	Non Clone- Non Clone	h6b1	12.104	951.247	472.369	1946.549	19.592
Ecad MO N-N	Non Clone- Non Clone	h6b1	12.104	689.116	336.335	1340.724	19.592
Ecad MO N-N	Non Clone- Non Clone	h6b1	12.104	500.532	203.125	1007.28	19.592
Ecad MO N-N	Non Clone- Non Clone	h6b1	12.104	407.313	175.92	846.255	19.592
Ecad MO N-N	Non Clone- Non Clone
Ecad MO N-N	Non Clone- Non Clone	h6b2	9.51	1138.858	505.2	2045.21	15.375
Ecad MO N-N	Non Clone- Non Clone	h6b2	9.51	1100.921	458.888	2223.674	15.375
Ecad MO N-N	Non Clone- Non Clone	h6b2	9.51	838.662	382.665	1968.287	15.375
Ecad MO N-N	Non Clone- Non Clone	h6b2	9.51	523.944	232.811	1095.086	15.375
Ecad MO N-N	Non Clone- Non Clone
Ecad MO N-N	Non Clone- Non Clone	h6b3	12.158	826.502	309.681	2414.436	19.68
Ecad MO N-N	Non Clone- Non Clone	h6b3	12.158	607.819	238.028	2164.562	19.68
Ecad MO N-N	Non Clone- Non Clone	h6b3	12.158	410.566	180.342	1047.135	19.68
Ecad MO N-N	Non Clone- Non Clone	h6b3	12.158	323.401	151.831	832.633	19.68
Ecad MO N-N	Non Clone- Non Clone
Ecad MO N-N	Non Clone- Non Clone	h6b4	8.808	1016.158	454.612	2293.424	14.233
Ecad MO N-N	Non Clone- Non Clone	h6b4	8.808	956.136	390.021	1958.18	14.233
Ecad MO N-N	Non Clone- Non Clone	h6b4	8.808	690.495	297.547	1447.949	14.233
Ecad MO N-N	Non Clone- Non Clone	h6b4	8.808	476.179	185.007	855.726	14.233
Ecad MO N-N	Non Clone- Non Clone	h6b4	8.808	412.04	141.013	878.86	14.233
Ecad MO N-N	Non Clone- Non Clone
Ecad MO N-N	Non Clone- Non Clone	h6b5	7.295	617.38	306.02	1231.616	11.773
Ecad MO N-N	Non Clone- Non Clone	h6b5	7.295	502.914	268.7	875.906	11.773
Ecad MO N-N	Non Clone- Non Clone	h6b5	7.295	420.779	208.206	918.702	11.773
Ecad MO N-N	Non Clone- Non Clone	h6b5	7.295	368.469	157.981	834.835	11.773
Ecad MO N-N	Non Clone- Non Clone
Ecad MO N-N	Non Clone- Non Clone	h6b6	6.214	657.065	409.31	1385.564	10.016
Ecad MO N-N	Non Clone- Non Clone	h6b6	6.214	533.737	313.311	838.901	10.016
Ecad MO N-N	Non Clone- Non Clone	h6b6	6.214	430.305	220.476	891.681	10.016
Ecad MO N-N	Non Clone- Non Clone	h6b6	6.214	359.544	190.358	628.308	10.016
Ecad MO N-N	Non Clone- Non Clone	h7b1	9.888	737.801	253.329	1772.968	15.99
Ecad MO N-N	Non Clone- Non Clone	h7b1	9.888	662.244	267.113	1404.466	15.99
Ecad MO N-N	Non Clone- Non Clone	h7b1	9.888	570.452	262.266	1199.018	15.99
Ecad MO N-N	Non Clone- Non Clone	h7b1	9.888	473.393	211.844	1050.66	15.99
Ecad MO N-N	Non Clone- Non Clone	h7b1	9.888	391.257	193.37	787.441	15.99
Ecad MO N-N	Non Clone- Non Clone	h7b1	9.888	323.851	186.463	547.081	15.99
Ecad MO N-N	Non Clone- Non Clone
Ecad MO N-N	Non Clone- Non Clone	h7b2	9.726	983.423	413.015	2056.933	15.727
Ecad MO N-N	Non Clone- Non Clone	h7b2	9.726	856.937	377.674	1745.555	15.727
Ecad MO N-N	Non Clone- Non Clone	h7b2	9.726	715.199	327.909	1368.36	15.727
Ecad MO N-N	Non Clone- Non Clone	h7b2	9.726	562.793	254.423	1079.077	15.727
Ecad MO N-N	Non Clone- Non Clone	h7b2	9.726	442.461	213.493	908.921	15.727
Ecad MO N-N	Non Clone- Non Clone	h7b2	9.726	364.199	181.313	729.728	15.727
Ecad MO N-N	Non Clone- Non Clone	h7b2	9.726	305.305	127.133	589.137	15.727
Ecad MO N-N	Non Clone- Non Clone
Ecad MO N-N	Non Clone- Non Clone	h7b3	8.105	1053.868	421.371	2552.525	13.084
Ecad MO N-N	Non Clone- Non Clone	h7b3	8.105	1048.537	455.763	2495.514	13.084
Ecad MO N-N	Non Clone- Non Clone	h7b3	8.105	980.075	415.253	2268.345	13.084
Ecad MO N-N	Non Clone- Non Clone	h7b3	8.105	848.866	343.314	1676.752	13.084
Ecad MO N-N	Non Clone- Non Clone	h7b3	8.105	720.453	287.41	1451.744	13.084
Ecad MO N-N	Non Clone- Non Clone	h7b3	8.105	591.1	255.827	1286.779	13.084
Ecad MO N-N	Non Clone- Non Clone	h7b3	8.105	469.486	237.371	1042.408	13.084
Ecad MO N-N	Non Clone- Non Clone	h7b3	8.105	351.699	168.258	705.466	13.084
Ecad MO N-N	Non Clone- Non Clone
Ecad MO N-N	Non Clone- Non Clone
Ecad MO N-N	Non Clone- Non Clone
Ecad MO N-N	Non Clone- Non Clone	h8b1	15.4	298.33	142.593	899.894	24.952
Ecad MO N-N	Non Clone- Non Clone	h8b1	15.4	249.152	108.267	924.788	24.952
Ecad MO N-N	Non Clone- Non Clone	h8b1	15.4	210.999	113.254	471.59	24.952
Ecad MO N-N	Non Clone- Non Clone	h8b1	15.4	188.855	107.01	405.603	24.952
Ecad MO N-N	Non Clone- Non Clone
Ecad MO N-N	Non Clone- Non Clone	h8b2	10.753	302.762	138.778	671.656	17.396
Ecad MO N-N	Non Clone- Non Clone	h8b2	10.753	254.287	114.391	578.511	17.396
Ecad MO N-N	Non Clone- Non Clone	h8b2	10.753	207.387	117.38	430.853	17.396
Ecad MO N-N	Non Clone- Non Clone	h8b2	10.753	180.748	106.059	343.94	17.396
Ecad MO N-N	Non Clone- Non Clone
Ecad MO N-N	Non Clone- Non Clone	h8b3	13.563	304.82	134.142	724.761	21.965
Ecad MO N-N	Non Clone- Non Clone	h8b3	13.563	255.199	143.372	560.713	21.965
Ecad MO N-N	Non Clone- Non Clone	h8b3	13.563	218.297	127.471	533.3	21.965
Ecad MO N-N	Non Clone- Non Clone	h8b3	13.563	218.297	127.471	533.3	21.965
Ecad MO N-N	Non Clone- Non Clone
Ecad MO N-N	Non Clone- Non Clone	h8b4	12.644	369.998	149.063	799.698	20.471
Ecad MO N-N	Non Clone- Non Clone	h8b4	12.644	299.957	135.708	820.526	20.471
Ecad MO N-N	Non Clone- Non Clone	h8b4	12.644	249.496	117.348	569.18	20.471
Ecad MO N-N	Non Clone- Non Clone	h8b4	12.644	211.701	118.956	466.913	20.471
Ecad MO N-N	Non Clone- Non Clone	h8b4	12.644	182.127	108.455	301.082	20.471
Ecad MO N-N	Non Clone- Non Clone	h8b4	12.644	167.881	101.371	278.174	20.471
Ecad MO N-N	Non Clone- Non Clone	h9b1	9.888	225.489	100.147	778.34	15.99
[truncated: 4 more rows]
