# Supplementary material for: Stepwise polarisation of developing bilayered epidermis is mediated by aPKC and E-cadherin in zebrafish
Source: eLife journal article supplement (doi:10.7554/elife.49064), 2020-01-22
Supplement: fig5-data4 [file elife-49064-fig5-data4-v1.csv]

Genotype	Boundary	Cell name	Area	Mean	Min	Max	Length
Ctrl MO C-C	Clone- Clone	h1b1	11.077	677.365	198.272	1580.743	17.923
Ctrl MO C-C	Clone- Clone	h1b1	11.077	689.736	170.39	1359.503	17.923
Ctrl MO C-C	Clone- Clone	h1b1	11.077	657.743	153.992	1661.882	17.923
Ctrl MO C-C	Clone- Clone	h1b1	11.077	561.659	154.006	1789.814	17.923
Ctrl MO C-C	Clone- Clone	h1b1	11.077	491.289	172.395	1645.861	17.923
Ctrl MO C-C	Clone- Clone	h1b1	11.725	508.691	186.353	1237.616	18.978
Ctrl MO C-C	Clone- Clone	h1b1	11.725	465.298	162.859	1122.605	18.978
Ctrl MO C-C	Clone- Clone
Ctrl MO C-C	Clone- Clone	h1b2	14.103	688.379	198.091	1670.685	22.843
Ctrl MO C-C	Clone- Clone	h1b2	14.103	746.22	177.784	1792.317	22.843
Ctrl MO C-C	Clone- Clone	h1b2	14.103	760.58	170.532	1986.651	22.843
Ctrl MO C-C	Clone- Clone	h1b2	14.103	753.939	189.513	1891.363	22.843
Ctrl MO C-C	Clone- Clone	h1b2	14.103	713.66	197.933	1670.87	22.843
Ctrl MO C-C	Clone- Clone	h1b2	14.103	667.802	197.681	1458.711	22.843
Ctrl MO C-C	Clone- Clone	h1b2	14.103	618.903	218.986	1497.721	22.843
Ctrl MO C-C	Clone- Clone	h1b2	14.103	582.686	195.614	1283.597	22.843
Ctrl MO C-C	Clone- Clone	h1b2	14.103	557.803	219.485	1311.767	22.843
Ctrl MO C-C	Clone- Clone	h2b1	9.888	802.104	252.169	1976.485	15.99
Ctrl MO C-C	Clone- Clone	h2b1	9.888	783.07	231.831	1911.615	15.99
Ctrl MO C-C	Clone- Clone	h2b1	9.888	758.371	237.45	1808.799	15.99
Ctrl MO C-C	Clone- Clone	h2b1	9.888	735.456	274.655	1790.358	15.99
Ctrl MO C-C	Clone- Clone	h2b1	9.888	710.466	249.007	1594.278	15.99
Ctrl MO C-C	Clone- Clone	h2b1	9.888	693.888	236.456	1482.453	15.99
Ctrl MO C-C	Clone- Clone	h2b1	9.888	684.706	231.199	1438.916	15.99
Ctrl MO C-C	Clone- Clone
Ctrl MO C-C	Clone- Clone	h2b2	5.89	431.994	145.58	1635.209	9.489
Ctrl MO C-C	Clone- Clone	h2b2	5.89	493.545	171.692	1702.155	9.489
Ctrl MO C-C	Clone- Clone	h2b2	5.89	506.819	165.297	1493.839	9.489
Ctrl MO C-C	Clone- Clone	h2b2	6.43	853.091	311.134	1979.013	10.367
Ctrl MO C-C	Clone- Clone	h2b2	6.43	854.002	328.874	1895.405	10.367
Ctrl MO C-C	Clone- Clone	h2b2	6.43	841.702	391.116	1712.312	10.367
Ctrl MO C-C	Clone- Clone	h2b2	6.43	816.053	313.4	1756.056	10.367
Ctrl MO C-C	Clone- Clone	h2b2	6.43	782.027	258.5	1632.099	10.367
Ctrl MO C-C	Clone- Clone	h2b2	6.43	738.975	214.589	1459.921	10.367
Ctrl MO C-C	Clone- Clone	h2b2	6.43	705.08	197.519	1500.88	10.367
Ctrl MO C-C	Clone- Clone	h2b2	6.43	663.618	180.706	1300.361	10.367
Ctrl MO C-C	Clone- Clone	h2b2	6.43	641.739	209.958	1248.233	10.367
Ctrl MO C-C	Clone- Clone	h2b2	6.43	597.143	181.846	1364.273	10.367
Ctrl MO C-C	Clone- Clone
Ctrl MO C-C	Clone- Clone	h2b3	11.185	1190.344	383.062	2337.776	18.099
Ctrl MO C-C	Clone- Clone	h2b3	11.185	1236.231	415.722	2448.267	18.099
Ctrl MO C-C	Clone- Clone	h2b3	11.185	1207.639	371.739	2366.427	18.099
Ctrl MO C-C	Clone- Clone	h2b3	11.185	1108.379	375.083	2365.184	18.099
Ctrl MO C-C	Clone- Clone	h2b3	11.185	1000.581	329.309	2147.412	18.099
Ctrl MO C-C	Clone- Clone	h2b3	11.185	904.466	343.95	1801.229	18.099
Ctrl MO C-C	Clone- Clone	h2b3	11.185	830.379	325.801	1686.806	18.099
Ctrl MO C-C	Clone- Clone	h2b3	11.185	750.62	292.953	1603.553	18.099
Ctrl MO C-C	Clone- Clone	h2b3	11.185	670.86	300.989	1722.937	18.099
Ctrl MO C-C	Clone- Clone	h2b3	11.185	602.015	279.34	1601.141	18.099
Ctrl MO C-C	Clone- Clone	h3b1	12.914	605.718	191.221	1419.455	20.91
Ctrl MO C-C	Clone- Clone	h3b1	12.914	658.204	197.535	1394.869	20.91
Ctrl MO C-C	Clone- Clone	h3b1	12.914	644.243	199.815	1251.498	20.91
Ctrl MO C-C	Clone- Clone	h3b1	12.914	609.404	264.207	1372.351	20.91
Ctrl MO C-C	Clone- Clone	h3b1	12.914	553.769	240.299	1252.645	20.91
Ctrl MO C-C	Clone- Clone	h3b1	12.914	472.707	216.21	961.463	20.91
Ctrl MO C-C	Clone- Clone
Ctrl MO C-C	Clone- Clone	h3b2	12.752	646.803	209.695	1384.622	20.647
Ctrl MO C-C	Clone- Clone	h3b2	12.752	780.314	245.609	1628.082	20.647
Ctrl MO C-C	Clone- Clone	h3b2	12.752	883.65	264.321	1722.352	20.647
Ctrl MO C-C	Clone- Clone	h3b2	12.752	868.896	299.72	1779.38	20.647
Ctrl MO C-C	Clone- Clone	h3b2	12.752	810.315	331.142	1710.379	20.647
Ctrl MO C-C	Clone- Clone	h3b2	12.752	693.454	238.652	1743.198	20.647
Ctrl MO C-C	Clone- Clone	h3b2	12.752	585.54	191.221	1760.525	20.647
Ctrl MO C-C	Clone- Clone
Ctrl MO C-C	Clone- Clone	h3b3	6.7	413.487	0	698.505	10.807
Ctrl MO C-C	Clone- Clone	h3b3	6.7	462.519	0	826.297	10.807
Ctrl MO C-C	Clone- Clone	h3b3	6.7	544.873	0	1245.648	10.807
Ctrl MO C-C	Clone- Clone	h3b3	6.7	591.117	0	1276.076	10.807
Ctrl MO C-C	Clone- Clone	h3b3	6.7	628.065	0	1176.268	10.807
Ctrl MO C-C	Clone- Clone	h3b3	6.7	656.505	0	1228.053	10.807
Ctrl MO C-C	Clone- Clone	h3b3	6.7	583.526	0	1041.149	10.807
Ctrl MO C-C	Clone- Clone
Ctrl MO C-C	Clone- Clone	h3b4	9.24	463.646	181.569	1082.253	14.936
Ctrl MO C-C	Clone- Clone	h3b4	9.24	527.436	218.113	1227.128	14.936
Ctrl MO C-C	Clone- Clone	h3b4	9.888	585.088	217.682	1250.451	15.99
Ctrl MO C-C	Clone- Clone	h3b4	9.888	589.756	245.036	1247.586	15.99
Ctrl MO C-C	Clone- Clone	h3b4	9.888	555.056	236.968	1080.277	15.99
Ctrl MO C-C	Clone- Clone	h3b4	9.888	470.47	218.94	1206.447	15.99
Ctrl MO C-C	Clone- Clone
Ctrl MO C-C	Clone- Clone	h3b5	9.294	473.734	173.133	1246.247	15.024
Ctrl MO C-C	Clone- Clone	h3b5	9.294	536.339	159.24	1371.333	15.024
Ctrl MO C-C	Clone- Clone	h3b5	9.294	583.397	184.082	1388.949	15.024
Ctrl MO C-C	Clone- Clone	h3b5	9.294	565.839	200.939	1477.247	15.024
Ctrl MO C-C	Clone- Clone	h3b5	9.294	536.922	215.462	1321.773	15.024
Ctrl MO C-C	Clone- Clone	h3b5	9.294	504.943	210.316	1324.712	15.024
Ctrl MO C-C	Clone- Clone	h4b1	9.942	738.72	260.509	1731.528	16.078
Ctrl MO C-C	Clone- Clone	h4b1	9.942	809.569	279.03	1923.687	16.078
Ctrl MO C-C	Clone- Clone	h4b1	9.942	861.167	249.06	2136.7	16.078
Ctrl MO C-C	Clone- Clone	h4b1	9.942	912.247	255.425	2092.276	16.078
Ctrl MO C-C	Clone- Clone	h4b1	9.942	891.359	291.606	1870.838	16.078
Ctrl MO C-C	Clone- Clone	h4b1	9.942	774.071	336.689	1619.826	16.078
Ctrl MO C-C	Clone- Clone	h4b1	9.942	628.156	274.089	1433.926	16.078
Ctrl MO C-C	Clone- Clone
Ctrl MO C-C	Clone- Clone	h4b2	8.537	1064.343	329.112	2296.414	13.794
Ctrl MO C-C	Clone- Clone	h4b2	8.537	1220.702	359.754	2551.534	13.794
Ctrl MO C-C	Clone- Clone	h4b2	8.537	1279.095	371.131	2601.25	13.794
Ctrl MO C-C	Clone- Clone	h4b2	8.537	1318.527	341.472	3187.126	13.794
Ctrl MO C-C	Clone- Clone	h4b2	8.537	1348.576	410.404	2995.065	13.794
Ctrl MO C-C	Clone- Clone	h4b2	8.537	1294.847	431.302	2812.703	13.794
Ctrl MO C-C	Clone- Clone	h4b2	8.537	1035.116	390.059	2291.799	13.794
Ctrl MO C-C	Clone- Clone
Ctrl MO C-C	Clone- Clone	h4b3	8.7	465.798	199.775	1301.523	14.033
Ctrl MO C-C	Clone- Clone	h4b3	8.7	500.4	197.827	1637.377	14.033
Ctrl MO C-C	Clone- Clone	h4b3	8.591	742.301	256.419	1549.94	13.847
Ctrl MO C-C	Clone- Clone	h4b3	8.591	690.099	247.033	1440.772	13.847
Ctrl MO C-C	Clone- Clone	h4b3	8.591	622.067	224.191	1520.138	13.847
Ctrl MO C-C	Clone- Clone	h4b3	8.591	619.78	254.017	1673.098	13.847
Ctrl MO C-C	Clone- Clone
Ctrl MO C-C	Clone- Clone	h4b4	7.673	917.282	332.829	1696.308	12.388
Ctrl MO C-C	Clone- Clone	h4b4	7.673	1076.649	395.027	1822.137	12.388
Ctrl MO C-C	Clone- Clone	h4b4	7.673	1094.297	403.174	2160.712	12.388
Ctrl MO C-C	Clone- Clone	h4b4	7.673	1064.283	391.647	2328.265	12.388
Ctrl MO C-C	Clone- Clone	h4b4	7.673	992.647	392.142	2115.709	12.388
Ctrl MO C-C	Clone- Clone
Ctrl MO C-C	Clone- Clone	h4b5	3.458	865.421	272.626	1940.141	5.535
Ctrl MO C-C	Clone- Clone	h4b5	3.458	954.101	264.816	2035.569	5.535
Ctrl MO C-C	Clone- Clone	h4b5	3.458	922.138	299.882	1974.183	5.535
Ctrl MO C-C	Clone- Clone	h4b5	3.458	849.144	333.198	1821.247	5.535
Ctrl MO C-C	Clone- Clone	h4b5	3.458	705.591	374.029	1478.414	5.535
Ctrl MO C-C	Clone- Clone
Ctrl MO C-C	Clone- Clone	h4b6	8.645	569.506	220.503	1342.86	13.969
Ctrl MO C-C	Clone- Clone	h4b6	8.645	585.796	238.35	1359.595	13.969
Ctrl MO C-C	Clone- Clone	h4b6	8.645	562.098	233.879	1510.193	13.969
Ctrl MO C-C	Clone- Clone	h4b6	9.186	888.156	253.638	2055.459	14.848
Ctrl MO C-C	Clone- Clone	h4b6	9.186	930.062	257.178	2328.165	14.848
Ctrl MO C-C	Clone- Clone	h4b6	9.186	822.711	305.243	2043.313	14.848
Ctrl MO C-C	Clone- Clone	h4b6	9.186	661.065	254.654	1946.856	14.848
Ctrl MO C-C	Clone- Clone
Ctrl MO C-C	Clone- Clone	h4b7	5.998	587.629	246.428	1205.458	9.664
Ctrl MO C-C	Clone- Clone	h4b7	5.998	620.308	240.842	1448.912	9.664
Ctrl MO C-C	Clone- Clone	h4b7	5.566	750.307	255.231	1589.624	8.961
Ctrl MO C-C	Clone- Clone	h4b7	5.566	749.651	262.646	1613.9	8.961
Ctrl MO C-C	Clone- Clone	h4b7	5.566	646.24	235.884	1471.852	8.961
Ctrl MO C-C	Clone- Clone	h4b7	5.566	473.055	182.082	1061.044	8.961
Ctrl MO C-C	Clone- Clone	h5b1	8.97	448.805	151.002	924.974	14.497
Ctrl MO C-C	Clone- Clone	h5b1	8.97	536.876	144.734	1221.496	14.497
Ctrl MO C-C	Clone- Clone	h5b1	8.97	552.563	129.273	1163.482	14.497
Ctrl MO C-C	Clone- Clone	h5b1	8.97	564.157	105.349	1233.203	14.497
Ctrl MO C-C	Clone- Clone	h5b1	8.97	576.698	97.76	1247.076	14.497
Ctrl MO C-C	Clone- Clone	h6b1	11.023	1065.167	218.068	2356.987	17.835
Ctrl MO C-C	Clone- Clone	h6b1	11.023	1244.891	203.251	2731.693	17.835
Ctrl MO C-C	Clone- Clone	h6b1	11.023	1294.729	237.493	2724.451	17.835
Ctrl MO C-C	Clone- Clone	h6b1	11.023	1237.659	294.753	2802.852	17.835
Ctrl MO C-C	Clone- Clone	h6b1	11.023	1122.427	349.061	2302.993	17.835
Ctrl MO C-C	Clone- Clone	h6b1	11.023	1007.976	369.565	2034.559	17.835
Ctrl MO C-C	Clone- Clone
Ctrl MO C-C	Clone- Clone	h6b2	1.459	689.262	268.618	1293.051	2.284
Ctrl MO C-C	Clone- Clone	h6b2	1.459	754.817	272.457	1552.193	2.284
Ctrl MO C-C	Clone- Clone	h6b2	1.459	652.02	247.543	1569.899	2.284
Ctrl MO C-C	Clone- Clone	h6b2	2.161	782.957	226.035	1531.419	3.426
Ctrl MO C-C	Clone- Clone	h6b2	2.161	890.677	329.235	1531.744	3.426
Ctrl MO C-C	Clone- Clone	h6b2	2.161	851.629	420.438	1506.545	3.426
Ctrl MO C-C	Clone- Clone	h6b2	2.161	729.581	353.115	1319.959	3.426
Ctrl MO C-C	Clone- Clone	h6b2	2.161	579.026	310.403	979.729	3.426
Ctrl MO C-C	Clone- Clone
Ctrl MO C-C	Clone- Clone	h6b3	6.214	938.179	242.315	1744.749	10.016
Ctrl MO C-C	Clone- Clone	h6b3	6.214	762.829	247.929	1729.066	10.016
Ctrl MO C-C	Clone- Clone	h6b3	6.214	552.985	189.553	1163.98	10.016
Ctrl MO C-C	Clone- Clone	h6b3	6.43	790.001	259.018	1745.082	10.367
Ctrl MO C-C	Clone- Clone	h6b3	6.43	990.132	342.256	1988.417	10.367
Ctrl MO C-C	Clone- Clone	h6b3	6.43	980.643	395.876	1911.544	10.367
Ctrl MO C-C	Clone- Clone	h6b3	6.43	874.617	362.763	1622.018	10.367
Ctrl MO C-C	Clone- Clone	h6b3	6.43	662.046	305.544	1396.785	10.367
Ctrl MO C-C	Clone- Clone	h7b1	12.806	447.22	160.537	848.562	20.735
Ctrl MO C-C	Clone- Clone	h7b1	12.806	518.898	172.988	979.676	20.735
Ctrl MO C-C	Clone- Clone	h7b1	12.806	546.749	149.489	1141.832	20.735
Ctrl MO C-C	Clone- Clone	h7b1	12.806	545.232	152.662	1167.573	20.735
Ctrl MO C-C	Clone- Clone	h7b1	12.806	530.552	178.158	1224.109	20.735
Ctrl MO C-C	Clone- Clone	h7b1	12.806	491.389	137.769	1069.771	20.735
Ctrl MO C-C	Clone- Clone	h7b1	12.806	449.222	167.766	970.143	20.735
Ctrl MO C-C	Clone- Clone	h8b1	8.321	641.118	232.993	1334.247	13.442
Ctrl MO C-C	Clone- Clone	h8b1	8.321	764.486	254.279	1504.365	13.442
Ctrl MO C-C	Clone- Clone	h8b1	8.321	762.994	236.886	1503.673	13.442
Ctrl MO C-C	Clone- Clone	h8b1	8.321	716.223	255.591	1714.587	13.442
Ctrl MO C-C	Clone- Clone	h8b1	8.321	652.511	247.28	1430.303	13.442
Ctrl MO C-C	Clone- Clone	h8b1	8.321	583.654	274.513	1181.774	13.442
Ctrl MO C-C	Clone- Clone	h8b1	8.321	528.821	256.169	1202.869	13.442
Ctrl MO C-C	Clone- Clone
Ctrl MO C-C	Clone- Clone	h8b2	7.889	474.595	168.796	996.091	12.74
Ctrl MO C-C	Clone- Clone	h8b2	7.889	619.5	182.564	1522.009	12.74
Ctrl MO C-C	Clone- Clone	h8b2	7.889	768.606	196.948	1942.539	12.74
Ctrl MO C-C	Clone- Clone	h8b2	7.889	780.81	190.931	2067.365	12.74
Ctrl MO C-C	Clone- Clone	h8b2	7.889	737.928	264.108	2224.883	12.74
Ctrl MO C-C	Clone- Clone	h8b2	7.889	662.474	293.21	1454.836	12.74
Ctrl MO C-C	Clone- Clone
Ctrl MO C-C	Clone- Clone	h8b3	10.375	416.772	149.633	1145.759	16.781
Ctrl MO C-C	Clone- Clone	h8b3	10.375	474.202	148.344	1498.105	16.781
Ctrl MO C-C	Clone- Clone	h8b3	10.375	476.96	151.386	1494.111	16.781
Ctrl MO C-C	Clone- Clone	h8b3	10.375	451.541	164.168	1743.91	16.781
Ctrl MO C-C	Clone- Clone	h8b3	10.429	548.319	168.652	1614.831	16.869
Ctrl MO C-C	Clone- Clone	h8b3	10.429	515.623	202.797	1567.013	16.869
Ctrl MO C-C	Clone- Clone	h8b3	10.429	489.467	158.892	1487.571	16.869
Ctrl MO C-C	Clone- Clone	h8b3	10.429	446.381	185.741	1395.011	16.869
Ctrl MO C-C	Clone- Clone
Ctrl MO N-C	Non Clone- Clone	h1b1	12.914	603.082	181.128	1195.207	20.91
Ctrl MO N-C	Non Clone- Clone	h1b1	12.914	704.176	187.922	1419.037	20.91
Ctrl MO N-C	Non Clone- Clone	h1b1	12.914	787.714	165.421	1829.684	20.91
Ctrl MO N-C	Non Clone- Clone	h1b1	12.914	840.311	161.363	1843.294	20.91
Ctrl MO N-C	Non Clone- Clone	h1b1	12.914	847.265	142.102	1755.198	20.91
Ctrl MO N-C	Non Clone- Clone	h1b1	12.914	781.523	122.097	1588.07	20.91
Ctrl MO N-C	Non Clone- Clone	h1b1	12.914	697.58	103.625	1408.075	20.91
Ctrl MO N-C	Non Clone- Clone	h1b1	12.914	635.777	117.975	1397.705	20.91
Ctrl MO N-C	Non Clone- Clone	h1b1	12.914	555.575	114.182	1356.085	20.91
Ctrl MO N-C	Non Clone- Clone
Ctrl MO N-C	Non Clone- Clone	h1b2	9.186	625.715	236.731	1190.614	14.848
Ctrl MO N-C	Non Clone- Clone	h1b2	9.186	648.035	188.941	1436.95	14.848
Ctrl MO N-C	Non Clone- Clone	h1b2	9.186	642.04	238.003	1562.653	14.848
Ctrl MO N-C	Non Clone- Clone	h1b2	9.186	591.655	214.978	1260.752	14.848
Ctrl MO N-C	Non Clone- Clone	h1b2	9.186	567.304	204.219	1164.638	14.848
Ctrl MO N-C	Non Clone- Clone	h1b2	9.186	546.178	218.695	1084.141	14.848
Ctrl MO N-C	Non Clone- Clone	h1b2	9.186	532.714	207.945	1052.267	14.848
Ctrl MO N-C	Non Clone- Clone	h1b2	9.186	539.16	237.616	1043.37	14.848
Ctrl MO N-C	Non Clone- Clone	h1b2	9.186	530.965	218.25	1088.86	14.848
Ctrl MO N-C	Non Clone- Clone	h2b1	3.458	370.054	136.096	1572.463	5.535
Ctrl MO N-C	Non Clone- Clone	h2b1	3.458	367.142	148.378	1475.205	5.535
Ctrl MO N-C	Non Clone- Clone	h2b1	3.458	336.808	121.063	1336.317	5.535
Ctrl MO N-C	Non Clone- Clone	h2b1	3.458	314.126	114.343	1140.086	5.535
Ctrl MO N-C	Non Clone- Clone	h2b1	3.458	316.663	120.496	1228.216	5.535
Ctrl MO N-C	Non Clone- Clone	h2b1	3.458	325.363	130.021	1261.511	5.535
Ctrl MO N-C	Non Clone- Clone	h2b1	3.458	333.501	137.274	852.919	5.535
Ctrl MO N-C	Non Clone- Clone	h2b1	3.458	360.449	139.218	780.847	5.535
Ctrl MO N-C	Non Clone- Clone	h2b1	3.458	372.679	152.843	740.74	5.535
Ctrl MO N-C	Non Clone- Clone	h2b1	3.458	359.879	145.259	634.253	5.535
Ctrl MO N-C	Non Clone- Clone
Ctrl MO N-C	Non Clone- Clone	h2b2	4.755	1044.174	277.157	2647.066	7.644
Ctrl MO N-C	Non Clone- Clone	h2b2	4.755	1052.618	332.321	2596.72	7.644
Ctrl MO N-C	Non Clone- Clone	h2b2	4.755	916.323	302.664	2275.503	7.644
Ctrl MO N-C	Non Clone- Clone	h2b2	4.755	781.131	276.937	1857.918	7.644
Ctrl MO N-C	Non Clone- Clone	h2b2	4.755	671.835	352.235	1477.201	7.644
Ctrl MO N-C	Non Clone- Clone	h2b2	4.755	620.911	342.134	1179.418	7.644
Ctrl MO N-C	Non Clone- Clone	h2b2	4.755	560.957	292.226	1408.573	7.644
Ctrl MO N-C	Non Clone- Clone	h3b1	10.429	483.671	174.121	1145.443	16.869
Ctrl MO N-C	Non Clone- Clone	h3b1	10.429	549.383	174.446	1439.847	16.869
Ctrl MO N-C	Non Clone- Clone	h3b1	10.429	580.022	239.059	1591.625	16.869
Ctrl MO N-C	Non Clone- Clone	h3b1	10.429	565.75	212.755	1776.517	16.869
Ctrl MO N-C	Non Clone- Clone	h3b1	10.537	704.583	285.294	1717.159	17.045
Ctrl MO N-C	Non Clone- Clone	h3b1	10.537	683.287	294.836	1477.419	17.045
Ctrl MO N-C	Non Clone- Clone	h3b1	10.537	651.528	270.59	1392.188	17.045
Ctrl MO N-C	Non Clone- Clone	h3b1	10.537	570.792	238.876	1398.511	17.045
Ctrl MO N-C	Non Clone- Clone
Ctrl MO N-C	Non Clone- Clone	h3b2	6.592	542.626	160.51	1231.965	10.631
Ctrl MO N-C	Non Clone- Clone	h3b2	6.592	620.363	152.852	1508.912	10.631
Ctrl MO N-C	Non Clone- Clone	h3b2	6.592	726.502	252.714	1662.28	10.631
Ctrl MO N-C	Non Clone- Clone	h3b2	6.592	756.917	294.845	1860.469	10.631
Ctrl MO N-C	Non Clone- Clone	h3b2	6.592	754.713	259.635	1728.232	10.631
Ctrl MO N-C	Non Clone- Clone	h3b2	6.592	669.049	255.618	1699.653	10.631
Ctrl MO N-C	Non Clone- Clone
Ctrl MO N-C	Non Clone- Clone	h3b3	7.511	687.43	193.123	1378.829	12.125
Ctrl MO N-C	Non Clone- Clone	h3b3	7.511	773.653	210.082	1567.263	12.125
Ctrl MO N-C	Non Clone- Clone	h3b3	7.511	764.248	248.932	1725.362	12.125
Ctrl MO N-C	Non Clone- Clone	h3b3	7.511	727.416	293.016	1459.348	12.125
Ctrl MO N-C	Non Clone- Clone	h3b3	7.511	678.18	283.166	1364.206	12.125
Ctrl MO N-C	Non Clone- Clone	h3b3	7.511	610.038	236.004	1227.191	12.125
Ctrl MO N-C	Non Clone- Clone	h4b1	8.808	982.452	358.439	1949.521	14.233
Ctrl MO N-C	Non Clone- Clone	h4b1	8.808	1120.591	372.007	2068.607	14.233
Ctrl MO N-C	Non Clone- Clone	h4b1	8.808	1125.865	380.451	1943.299	14.233
Ctrl MO N-C	Non Clone- Clone	h4b1	8.808	963.958	365.419	2239.933	14.233
Ctrl MO N-C	Non Clone- Clone	h4b1	8.808	717.569	243.458	2210.008	14.233
Ctrl MO N-C	Non Clone- Clone
Ctrl MO N-C	Non Clone- Clone	h4b2	7.187	1026.037	479.449	1886.203	11.597
Ctrl MO N-C	Non Clone- Clone	h4b2	7.187	1089.736	533.16	2198.244	11.597
Ctrl MO N-C	Non Clone- Clone	h4b2	7.187	951.403	524.87	1902.175	11.597
Ctrl MO N-C	Non Clone- Clone	h4b2	7.187	745.749	381.499	1333.429	11.597
Ctrl MO N-C	Non Clone- Clone	h4b2	7.187	529.715	215.396	1010.112	11.597
Ctrl MO N-C	Non Clone- Clone
Ctrl MO N-C	Non Clone- Clone	h4b3	8.375	920.034	299.826	1975.591	13.53
Ctrl MO N-C	Non Clone- Clone	h4b3	8.375	1077.795	290.104	2259.185	13.53
Ctrl MO N-C	Non Clone- Clone	h4b3	8.375	1117.596	332.216	2468.714	13.53
Ctrl MO N-C	Non Clone- Clone	h4b3	8.375	1038.976	369.346	2606.458	13.53
Ctrl MO N-C	Non Clone- Clone	h4b3	8.375	873.039	370.28	1907.665	13.53
Ctrl MO N-C	Non Clone- Clone	h4b3	8.375	704.695	300.228	1545.661	13.53
Ctrl MO N-C	Non Clone- Clone	h4b1	12.86	758.366	196.558	1707.918	20.823
Ctrl MO N-C	Non Clone- Clone	h4b1	12.86	819.327	199.769	2100.965	20.823
Ctrl MO N-C	Non Clone- Clone	h4b1	12.86	830.815	248.467	2146.413	20.823
Ctrl MO N-C	Non Clone- Clone	h4b1	12.86	774.627	264.202	2099.241	20.823
Ctrl MO N-C	Non Clone- Clone	h4b1	12.86	734.507	299.384	1863.472	20.823
Ctrl MO N-C	Non Clone- Clone
Ctrl MO N-C	Non Clone- Clone	h4b2	9.51	673.483	195.243	1298.171	15.375
Ctrl MO N-C	Non Clone- Clone	h4b2	9.51	812.779	191.466	1796.603	15.375
Ctrl MO N-C	Non Clone- Clone	h4b2	9.51	880.727	250.611	2013.904	15.375
Ctrl MO N-C	Non Clone- Clone	h4b2	9.51	845.52	230.275	2046.605	15.375
Ctrl MO N-C	Non Clone- Clone	h4b2	9.51	824.239	247.729	2263.536	15.375
Ctrl MO N-C	Non Clone- Clone	h4b2	9.51	755.809	263.64	2386.952	15.375
Ctrl MO N-C	Non Clone- Clone	h4b2	9.51	705.585	277.779	2195.948	15.375
Ctrl MO N-C	Non Clone- Clone
Ctrl MO N-C	Non Clone- Clone	h4b3	8.7	635.254	217.91	1412.288	14.057
Ctrl MO N-C	Non Clone- Clone	h4b3	8.7	790.377	272.88	1786.267	14.057
Ctrl MO N-C	Non Clone- Clone	h4b3	8.7	807.472	297.267	1704.224	14.057
Ctrl MO N-C	Non Clone- Clone	h4b3	8.7	695.346	276.562	1500.122	14.057
Ctrl MO N-C	Non Clone- Clone	h4b3	8.7	626.058	289.481	1624.728	14.057
Ctrl MO N-C	Non Clone- Clone	h4b3	8.7	612.763	288.56	1600.855	14.057
Ctrl MO N-C	Non Clone- Clone
Ctrl MO N-C	Non Clone- Clone	h4b4	8.808	698.559	255.322	1768.432	14.233
Ctrl MO N-C	Non Clone- Clone	h4b4	8.808	821.201	359.698	2216.213	14.233
Ctrl MO N-C	Non Clone- Clone	h4b4	8.808	879.053	373.276	1930.213	14.233
Ctrl MO N-C	Non Clone- Clone	h4b4	8.808	911.417	437.009	1642.307	14.233
Ctrl MO N-C	Non Clone- Clone	h4b4	8.808	873.798	405.369	1666.958	14.233
Ctrl MO N-C	Non Clone- Clone	h4b4	8.808	763.406	358.822	1800.8	14.233
Ctrl MO N-C	Non Clone- Clone	h4b4	8.808	704.789	263.475	1877.528	14.233
Ctrl MO N-C	Non Clone- Clone
Ctrl MO N-C	Non Clone- Clone	h4b5	9.996	810.603	262.061	1662.209	16.166
Ctrl MO N-C	Non Clone- Clone	h4b5	9.996	861.725	264.351	1826.066	16.166
Ctrl MO N-C	Non Clone- Clone	h4b5	9.996	786.431	228.696	1961.724	16.166
Ctrl MO N-C	Non Clone- Clone	h4b5	9.996	693.823	265.503	1681.753	16.166
Ctrl MO N-C	Non Clone- Clone	h4b5	9.996	621.421	291.245	1383.468	16.166
Ctrl MO N-C	Non Clone- Clone
Ctrl MO N-C	Non Clone- Clone	h4b6	8.321	944.796	241.718	1750.518	13.442
Ctrl MO N-C	Non Clone- Clone	h4b6	8.321	1035.1	334.626	1863.861	13.442
Ctrl MO N-C	Non Clone- Clone	h4b6	8.321	942.183	374.918	2106.916	13.442
Ctrl MO N-C	Non Clone- Clone	h4b6	8.429	896.083	335.544	2130.816	13.618
Ctrl MO N-C	Non Clone- Clone	h4b6	8.429	800.838	366.24	1641.674	13.618
Ctrl MO N-C	Non Clone- Clone	h4b6	8.429	599.065	303.793	1281.6	13.618
Ctrl MO N-C	Non Clone- Clone
Ctrl MO N-C	Non Clone- Clone	h4b7	7.943	892.032	305.728	1678.562	12.827
Ctrl MO N-C	Non Clone- Clone	h4b7	7.943	1055.822	464.195	1891.851	12.827
Ctrl MO N-C	Non Clone- Clone	h4b7	7.943	1113.01	500.541	1958.654	12.827
Ctrl MO N-C	Non Clone- Clone	h4b7	7.943	1072.382	522.001	2169.504	12.827
Ctrl MO N-C	Non Clone- Clone	h4b7	7.943	933.296	379.764	2125.018	12.827
Ctrl MO N-C	Non Clone- Clone	h4b7	7.943	759.298	233.358	1781.69	12.827
Ctrl MO N-C	Non Clone- Clone	h5b1	15.508	393.963	148.778	964.25	25.128
Ctrl MO N-C	Non Clone- Clone	h5b1	15.508	486.237	153.262	1254.078	25.128
Ctrl MO N-C	Non Clone- Clone	h5b1	15.508	529.89	171.344	1594.06	25.128
Ctrl MO N-C	Non Clone- Clone	h5b1	15.508	572.087	150.929	1374.024	25.128
Ctrl MO N-C	Non Clone- Clone	h5b1	15.508	578.11	203.659	1318.525	25.128
Ctrl MO N-C	Non Clone- Clone	h5b1	15.508	535.358	165.465	1238.73	25.128
Ctrl MO N-C	Non Clone- Clone
Ctrl MO N-C	Non Clone- Clone	h5b2	8.7	491.196	183.757	1098.847	14.057
Ctrl MO N-C	Non Clone- Clone	h5b2	8.7	629.528	237.743	1521.979	14.057
Ctrl MO N-C	Non Clone- Clone	h5b2	8.7	674.865	250.765	1677.165	14.057
Ctrl MO N-C	Non Clone- Clone	h5b2	8.7	659.027	276.614	1692.728	14.057
Ctrl MO N-C	Non Clone- Clone	h5b2	8.7	628.973	240.96	1357.813	14.057
Ctrl MO N-C	Non Clone- Clone	h5b2	8.7	549.149	233.273	1209.514	14.057
Ctrl MO N-C	Non Clone- Clone
Ctrl MO N-C	Non Clone- Clone	h5b3	11.942	438.236	136.522	1116.469	19.329
Ctrl MO N-C	Non Clone- Clone	h5b3	11.942	536.345	167.75	1261.134	19.329
Ctrl MO N-C	Non Clone- Clone	h5b3	11.942	588.786	185.006	1355.563	19.329
Ctrl MO N-C	Non Clone- Clone	h5b3	11.942	575.092	130.918	1362.375	19.329
Ctrl MO N-C	Non Clone- Clone	h5b3	11.942	550.398	144.863	1356.386	19.329
Ctrl MO N-C	Non Clone- Clone	h5b3	11.942	486.224	151.089	1150.516	19.329
Ctrl MO N-C	Non Clone- Clone	h6b1	10.969	706.496	188.078	1847.41	17.747
Ctrl MO N-C	Non Clone- Clone	h6b1	10.969	720.446	256.051	1838.987	17.747
Ctrl MO N-C	Non Clone- Clone	h6b1	10.969	747.668	237.726	1864.667	17.747
Ctrl MO N-C	Non Clone- Clone	h6b1	11.563	696.642	258.667	2103.593	18.714
Ctrl MO N-C	Non Clone- Clone	h6b1	11.563	777.612	287.371	2533.889	18.714
Ctrl MO N-C	Non Clone- Clone	h6b1	11.563	753.075	336.013	1681.523	18.714
Ctrl MO N-C	Non Clone- Clone	h6b1	11.563	588.718	293.361	1403.483	18.714
Ctrl MO N-C	Non Clone- Clone	h6b1	11.563	444.564	193.354	1286.499	18.714
Ctrl MO N-C	Non Clone- Clone
Ctrl MO N-C	Non Clone- Clone	h6b2	9.348	750.723	257.853	1833.781	15.101
Ctrl MO N-C	Non Clone- Clone	h6b2	9.348	893.143	267.692	1819.763	15.101
Ctrl MO N-C	Non Clone- Clone	h6b2	9.348	926.973	225.811	2041.433	15.101
Ctrl MO N-C	Non Clone- Clone	h6b2	9.348	917.621	246.644	1861.664	15.101
Ctrl MO N-C	Non Clone- Clone	h6b2	9.348	879.968	202.02	2020.262	15.101
Ctrl MO N-C	Non Clone- Clone	h6b2	9.348	813.202	222.888	1782.503	15.101
Ctrl MO N-C	Non Clone- Clone
Ctrl MO N-C	Non Clone- Clone	h6b3	14.265	715.966	161.697	2560.472	23.107
Ctrl MO N-C	Non Clone- Clone	h6b3	14.265	692.996	196.385	2099.23	23.107
Ctrl MO N-C	Non Clone- Clone	h6b3	14.265	580.793	230.396	1792.049	23.107
Ctrl MO N-C	Non Clone- Clone	h6b3	14.265	497.272	218.209	1420.684	23.107
Ctrl MO N-C	Non Clone- Clone	h6b3	14.265	444.22	204.591	1237.203	23.107
Ctrl MO N-C	Non Clone- Clone	h6b3	14.265	868.832	330.179	1697.269	23.107
Ctrl MO N-C	Non Clone- Clone	h6b3	14.265	754.016	232.92	1689.188	23.107
Ctrl MO N-C	Non Clone- Clone	h6b3	14.265	591.072	145.763	1527.216	23.107
Ctrl MO N-C	Non Clone- Clone
Ctrl MO N-C	Non Clone- Clone	h6b4	7.673	680.339	145.487	1932.212	12.388
Ctrl MO N-C	Non Clone- Clone	h6b4	7.673	835.159	160.466	2035.818	12.388
Ctrl MO N-C	Non Clone- Clone	h6b4	7.673	995.82	179.02	2063.133	12.388
Ctrl MO N-C	Non Clone- Clone	h6b4	7.673	1003.297	252.491	2174.18	12.388
Ctrl MO N-C	Non Clone- Clone	h6b4	7.673	859.832	259.737	1760.438	12.388
Ctrl MO N-C	Non Clone- Clone	h6b4	7.673	662.493	216.592	1479.545	12.388
Ctrl MO N-C	Non Clone- Clone	h6b4	7.673	498.286	188.112	1301.271	12.388
Ctrl MO N-C	Non Clone- Clone	h6b4	7.673	381.611	170.357	987.197	12.388
Ctrl MO N-C	Non Clone- Clone	h7b1	9.78	398.682	188.266	756.973	15.815
Ctrl MO N-C	Non Clone- Clone	h7b1	9.78	444.359	190.418	915.745	15.815
Ctrl MO N-C	Non Clone- Clone	h7b1	9.78	465.805	214.122	1056.196	15.815
Ctrl MO N-C	Non Clone- Clone	h7b1	9.78	466.266	188.976	952.548	15.815
Ctrl MO N-C	Non Clone- Clone	h7b1	9.78	469.072	209.173	1197.476	15.815
Ctrl MO N-C	Non Clone- Clone	h7b1	9.78	460.823	198.445	1246.726	15.815
Ctrl MO N-C	Non Clone- Clone	h7b1	9.78	452.476	221.828	1176.729	15.815
Ctrl MO N-C	Non Clone- Clone	h7b1	9.78	445.221	176.963	1159.325	15.815
Ctrl MO N-C	Non Clone- Clone	h7b1	9.78	438.813	207.579	1116.266	15.815
Ctrl MO N-C	Non Clone- Clone
Ctrl MO N-C	Non Clone- Clone	h7b2	2.215	490.67	211.739	762.23	3.511
Ctrl MO N-C	Non Clone- Clone	h7b2	2.215	507.281	223.207	850.859	3.511
Ctrl MO N-C	Non Clone- Clone	h7b2	2.215	513.4	199.459	870.306	3.511
Ctrl MO N-C	Non Clone- Clone	h7b2	2.215	476.927	218.612	907.903	3.511
Ctrl MO N-C	Non Clone- Clone	h7b2	2.215	431.814	212.716	734.359	3.511
Ctrl MO N-C	Non Clone- Clone	h7b2	2.215	394.696	191.019	684.492	3.511
Ctrl MO N-C	Non Clone- Clone	h7b2	2.215	363.727	195.057	537.596	3.511
Ctrl MO N-C	Non Clone- Clone
Ctrl MO N-C	Non Clone- Clone	h7b3	8.105	474.743	177.663	947.702	13.091
Ctrl MO N-C	Non Clone- Clone	h7b3	8.105	507.686	161.97	975.507	13.091
Ctrl MO N-C	Non Clone- Clone	h7b3	8.105	531.169	185.009	1223.021	13.091
Ctrl MO N-C	Non Clone- Clone	h7b3	8.105	537.735	173.765	1086.833	13.091
Ctrl MO N-C	Non Clone- Clone	h7b3	8.105	524.274	172.708	1046.535	13.091
Ctrl MO N-C	Non Clone- Clone	h7b3	8.105	496.679	196.057	956.522	13.091
Ctrl MO N-C	Non Clone- Clone	h7b3	8.105	455.953	184.036	981.818	13.091
Ctrl MO N-C	Non Clone- Clone	h7b3	8.105	416.915	180.939	950.373	13.091
Ctrl MO N-C	Non Clone- Clone
Ctrl MO N-C	Non Clone- Clone	h7b4	9.348	583.522	233.583	1181.209	15.112
Ctrl MO N-C	Non Clone- Clone	h7b4	9.348	602.635	216.744	1350.793	15.112
Ctrl MO N-C	Non Clone- Clone	h7b4	9.348	584.579	223.711	1395.759	15.112
Ctrl MO N-C	Non Clone- Clone	h7b4	9.348	574.399	253.396	1189.091	15.112
Ctrl MO N-C	Non Clone- Clone	h7b4	9.348	565.743	228.217	1198.93	15.112
Ctrl MO N-C	Non Clone- Clone	h7b4	9.348	552.164	217.329	1115.407	15.112
Ctrl MO N-C	Non Clone- Clone	h7b4	9.348	505.649	159.609	1179.761	15.112
Ctrl MO N-C	Non Clone- Clone	h8b1	8.862	386.192	159.079	900.834	14.321
Ctrl MO N-C	Non Clone- Clone	h8b1	8.862	494.968	189.395	1354.771	14.321
Ctrl MO N-C	Non Clone- Clone	h8b1	8.862	622.965	213.742	1710.695	14.321
Ctrl MO N-C	Non Clone- Clone	h8b1	8.862	687.91	232.458	1540.046	14.321
Ctrl MO N-C	Non Clone- Clone	h8b1	8.862	710.44	270.976	1485.063	14.321
Ctrl MO N-C	Non Clone- Clone	h8b1	8.862	744.712	244.95	1695.894	14.321
Ctrl MO N-C	Non Clone- Clone	h8b1	8.862	758.587	250.555	1677.347	14.321
Ctrl MO N-C	Non Clone- Clone	h8b1	8.862	681.348	295.039	1535.742	14.321
Ctrl MO N-C	Non Clone- Clone
Ctrl MO N-C	Non Clone- Clone	h8b2	8.213	788.065	223.391	2146.71	13.267
Ctrl MO N-C	Non Clone- Clone	h8b2	8.213	757.01	251.557	2069.825	13.267
Ctrl MO N-C	Non Clone- Clone	h8b2	8.213	719.966	268.311	1827.621	13.267
Ctrl MO N-C	Non Clone- Clone	h8b2	8.213	698.369	266.686	1714.096	13.267
Ctrl MO N-C	Non Clone- Clone	h8b2	8.213	659.098	240.591	1549.239	13.267
Ctrl MO N-C	Non Clone- Clone	h8b2	8.213	595.633	208.221	1228.443	13.267
Ctrl MO N-C	Non Clone- Clone	h8b2	8.213	498.402	185.999	1141.707	13.267
Ctrl MO N-C	Non Clone- Clone
Ctrl MO N-C	Non Clone- Clone	h8b3	8.916	418.676	146.804	1085.31	14.398
Ctrl MO N-C	Non Clone- Clone	h8b3	8.916	567.97	187.946	1543.787	14.398
Ctrl MO N-C	Non Clone- Clone	h8b3	8.916	678.924	200.769	1643.551	14.398
Ctrl MO N-C	Non Clone- Clone	h8b3	8.916	741.826	189.6	1763.083	14.398
Ctrl MO N-C	Non Clone- Clone	h8b3	8.916	803.102	206.61	1880.993	14.398
Ctrl MO N-C	Non Clone- Clone	h8b3	8.916	783.157	248.035	1792.935	14.398
Ctrl MO N-C	Non Clone- Clone	h8b3	8.916	711.984	270.494	1683.255	14.398
Ctrl MO N-C	Non Clone- Clone	h8b3	8.916	660.393	279.517	1871.549	14.398
Ctrl MO N-C	Non Clone- Clone	h8b3	8.916	626.273	249.637	1881.422	14.398
Ctrl MO N-C	Non Clone- Clone	h8b3	9.456	765.41	308.517	1779.92	15.28
Ctrl MO N-C	Non Clone- Clone	h8b3	9.456	678.488	234.904	1833.338	15.28
Ctrl MO N-C	Non Clone- Clone	h8b3	9.456	597.015	198.401	2119.212	15.28
Ctrl MO N-N	Non Clone- Non Clone	h1b1	4.215	369.548	102.575	978.691	6.765
Ctrl MO N-N	Non Clone- Non Clone	h1b1	4.215	355.463	104.028	928.888	6.765
Ctrl MO N-N	Non Clone- Non Clone	h1b1	4.215	359.025	98.971	1005.208	6.765
Ctrl MO N-N	Non Clone- Non Clone	h1b1	4.215	362.62	96.925	926.537	6.765
Ctrl MO N-N	Non Clone- Non Clone	h1b1	4.215	351.633	97.09	878.955	6.765
Ctrl MO N-N	Non Clone- Non Clone	h1b1	4.215	348.396	99.059	880.857	6.765
Ctrl MO N-N	Non Clone- Non Clone
Ctrl MO N-N	Non Clone- Non Clone	h1b2	10.321	688.492	196.985	1835.328	16.693
Ctrl MO N-N	Non Clone- Non Clone	h1b2	10.321	717.85	177.926	1695.488	16.693
Ctrl MO N-N	Non Clone- Non Clone	h1b2	10.321	702.022	204.826	1496.548	16.693
Ctrl MO N-N	Non Clone- Non Clone	h1b2	10.321	670.374	234.116	1706.141	16.693
Ctrl MO N-N	Non Clone- Non Clone	h1b2	10.321	623.835	224.071	1406.117	16.693
Ctrl MO N-N	Non Clone- Non Clone	h1b2	10.321	576.931	218.208	1190.588	16.693
Ctrl MO N-N	Non Clone- Non Clone	h1b2	10.321	559.393	209.272	1186.454	16.693
Ctrl MO N-N	Non Clone- Non Clone	h1b2	10.321	539.669	198.222	1127.075	16.693
Ctrl MO N-N	Non Clone- Non Clone	h1b2	10.321	530.997	200.585	1114.214	16.693
Ctrl MO N-N	Non Clone- Non Clone	h1b2	10.321	503.39	191.405	1177.383	16.693
Ctrl MO N-N	Non Clone- Non Clone
Ctrl MO N-N	Non Clone- Non Clone	h1b3	9.294	448.458	143.812	1022.332	15.024
Ctrl MO N-N	Non Clone- Non Clone	h1b3	9.294	460.446	162.964	1077.63	15.024
Ctrl MO N-N	Non Clone- Non Clone	h1b3	9.294	458.26	160.98	1099.984	15.024
Ctrl MO N-N	Non Clone- Non Clone	h1b3	9.186	620.872	190.103	1544.041	14.848
Ctrl MO N-N	Non Clone- Non Clone	h1b3	9.186	579.219	200.19	1288.943	14.848
Ctrl MO N-N	Non Clone- Non Clone	h1b3	9.186	541.792	173.998	1257.739	14.848
Ctrl MO N-N	Non Clone- Non Clone	h1b3	9.186	509.549	146.119	1224.041	14.848
Ctrl MO N-N	Non Clone- Non Clone	h1b3	9.186	470.56	162.106	1077.081	14.848
Ctrl MO N-N	Non Clone- Non Clone	h1b3	9.186	431.576	155.786	1038.216	14.848
Ctrl MO N-N	Non Clone- Non Clone	h1b3	9.186	397.362	144.616	926.838	14.848
Ctrl MO N-N	Non Clone- Non Clone	h1b3	9.186	357.249	134.07	836.097	14.848
Ctrl MO N-N	Non Clone- Non Clone
Ctrl MO N-N	Non Clone- Non Clone	h1b4	9.186	677.729	222.443	1448.409	14.848
Ctrl MO N-N	Non Clone- Non Clone	h1b4	9.186	631.799	241.74	1332.098	14.848
Ctrl MO N-N	Non Clone- Non Clone	h1b4	9.186	596.829	215.021	1124.729	14.848
Ctrl MO N-N	Non Clone- Non Clone	h1b4	9.186	562.257	235.157	1104.348	14.848
Ctrl MO N-N	Non Clone- Non Clone	h1b4	9.186	544.96	204.652	1340.124	14.848
Ctrl MO N-N	Non Clone- Non Clone	h1b4	9.186	506.068	225.845	1183.548	14.848
Ctrl MO N-N	Non Clone- Non Clone	h1b4	9.186	480.001	177.516	1050.273	14.848
Ctrl MO N-N	Non Clone- Non Clone	h1b4	9.186	445.272	198.275	843.227	14.848
Ctrl MO N-N	Non Clone- Non Clone	h1b4	9.186	428.556	173.717	801.585	14.848
Ctrl MO N-N	Non Clone- Non Clone
Ctrl MO N-N	Non Clone- Non Clone	h1b5	9.564	489.365	162.229	1030.094	15.463
Ctrl MO N-N	Non Clone- Non Clone	h1b5	9.564	706.396	194.889	1524.461	15.463
Ctrl MO N-N	Non Clone- Non Clone	h1b5	9.564	823.155	231.574	1886.641	15.463
Ctrl MO N-N	Non Clone- Non Clone	h1b5	9.564	940.368	258.916	2151.784	15.463
Ctrl MO N-N	Non Clone- Non Clone	h1b5	9.564	966.65	267.619	2377.006	15.463
Ctrl MO N-N	Non Clone- Non Clone	h1b5	9.564	911.334	277.147	2082.737	15.463
Ctrl MO N-N	Non Clone- Non Clone	h1b5	9.564	822.407	333.584	1941.324	15.463
Ctrl MO N-N	Non Clone- Non Clone
Ctrl MO N-N	Non Clone- Non Clone	h1b6	12.428	370.772	176.885	791.568	20.12
Ctrl MO N-N	Non Clone- Non Clone	h1b6	12.428	426.046	211.23	1096.788	20.12
Ctrl MO N-N	Non Clone- Non Clone	h1b6	12.428	556.466	224.201	1473.401	20.12
Ctrl MO N-N	Non Clone- Non Clone	h1b6	12.428	812.153	259.577	2170.957	20.12
Ctrl MO N-N	Non Clone- Non Clone	h1b6	12.428	975.006	342.945	2625.931	20.12
Ctrl MO N-N	Non Clone- Non Clone	h1b6	12.428	1071.053	348.194	2879.832	20.12
Ctrl MO N-N	Non Clone- Non Clone	h2b1	5.836	816.025	319.122	1949.885	9.401
Ctrl MO N-N	Non Clone- Non Clone	h2b1	5.836	771.981	324.422	2463.179	9.401
Ctrl MO N-N	Non Clone- Non Clone	h2b1	5.836	693.468	321.641	2550.478	9.401
Ctrl MO N-N	Non Clone- Non Clone	h2b1	5.836	976.827	303.025	1952.418	9.401
Ctrl MO N-N	Non Clone- Non Clone	h2b1	5.836	820.927	382.069	1724.071	9.401
Ctrl MO N-N	Non Clone- Non Clone	h2b1	5.836	732.293	331.908	1386.117	9.401
Ctrl MO N-N	Non Clone- Non Clone	h2b1	5.836	656.102	253.6	1335.48	9.401
Ctrl MO N-N	Non Clone- Non Clone
Ctrl MO N-N	Non Clone- Non Clone	h2b2	10.266	1012.108	287.084	2202.155	16.605
Ctrl MO N-N	Non Clone- Non Clone	h2b2	10.266	1256.119	277.375	2652.764	16.605
Ctrl MO N-N	Non Clone- Non Clone	h2b2	10.266	1267.062	323.324	2921.798	16.605
Ctrl MO N-N	Non Clone- Non Clone	h2b2	10.266	1027.331	377.301	2616.188	16.605
Ctrl MO N-N	Non Clone- Non Clone	h2b2	10.266	1344.949	442.943	2538.757	16.605
Ctrl MO N-N	Non Clone- Non Clone	h2b2	10.266	1174.255	472.236	2329.955	16.605
Ctrl MO N-N	Non Clone- Non Clone	h2b2	10.266	914.96	348.922	1921.808	16.605
Ctrl MO N-N	Non Clone- Non Clone	h2b2	10.266	768.83	279.143	1666.444	16.605
Ctrl MO N-N	Non Clone- Non Clone
Ctrl MO N-N	Non Clone- Non Clone	h2b3	9.51	899.295	295.993	1798.337	15.375
Ctrl MO N-N	Non Clone- Non Clone	h2b3	9.51	1153.398	377.641	2672.316	15.375
Ctrl MO N-N	Non Clone- Non Clone	h2b3	9.51	1251.335	395.287	3198.899	15.375
Ctrl MO N-N	Non Clone- Non Clone	h2b3	9.51	1199.057	337.452	3220.396	15.375
Ctrl MO N-N	Non Clone- Non Clone	h2b3	9.51	1076.486	290.811	2840.052	15.375
Ctrl MO N-N	Non Clone- Non Clone	h2b3	9.51	838.489	344.98	2424.071	15.375
Ctrl MO N-N	Non Clone- Non Clone	h2b3	9.51	636.139	242.023	1760.255	15.375
Ctrl MO N-N	Non Clone- Non Clone
Ctrl MO N-N	Non Clone- Non Clone	h2b4	6.862	1306.8	582.689	2828.321	11.07
Ctrl MO N-N	Non Clone- Non Clone	h2b4	6.862	1117.551	448.203	2487.251	11.07
Ctrl MO N-N	Non Clone- Non Clone	h2b4	6.862	923.832	291.898	2047.92	11.07
Ctrl MO N-N	Non Clone- Non Clone	h2b4	6.862	802.743	243.762	1864.046	11.07
Ctrl MO N-N	Non Clone- Non Clone
Ctrl MO N-N	Non Clone- Non Clone	h2b5	7.565	1138.631	330.163	2511.089	12.212
Ctrl MO N-N	Non Clone- Non Clone	h2b5	7.565	1307.165	350.578	2669.855	12.212
Ctrl MO N-N	Non Clone- Non Clone	h2b5	7.565	1258.104	374.802	2796.859	12.212
Ctrl MO N-N	Non Clone- Non Clone	h2b5	7.565	1059.547	417.833	2469.246	12.212
Ctrl MO N-N	Non Clone- Non Clone	h2b5	7.565	841.28	434.784	1712.203	12.212
Ctrl MO N-N	Non Clone- Non Clone	h2b5	7.565	654.246	296.411	1434.095	12.212
Ctrl MO N-N	Non Clone- Non Clone	h2b5	7.565	542.065	255.085	1191.024	12.212
Ctrl MO N-N	Non Clone- Non Clone	h3b1	11.023	557.669	197.22	1362.714	17.835
Ctrl MO N-N	Non Clone- Non Clone	h3b1	11.023	646.24	202.182	1642.987	17.835
Ctrl MO N-N	Non Clone- Non Clone	h3b1	11.023	711.698	217.745	1924.28	17.835
Ctrl MO N-N	Non Clone- Non Clone	h3b1	11.023	664.492	205.851	1886.974	17.835
Ctrl MO N-N	Non Clone- Non Clone	h3b1	11.023	598.806	266.084	1562.155	17.835
Ctrl MO N-N	Non Clone- Non Clone	h3b1	11.023	524.107	261.195	1234.44	17.835
Ctrl MO N-N	Non Clone- Non Clone	h3b1	11.023	467.931	210.869	936.103	17.835
Ctrl MO N-N	Non Clone- Non Clone
Ctrl MO N-N	Non Clone- Non Clone	h3b2	15.13	441.339	165.413	979.276	24.513
Ctrl MO N-N	Non Clone- Non Clone	h3b2	15.13	517.319	188.815	1180.469	24.513
Ctrl MO N-N	Non Clone- Non Clone	h3b2	15.13	577.826	192.152	1349.109	24.513
Ctrl MO N-N	Non Clone- Non Clone	h3b2	15.13	573.774	190.387	1521.446	24.513
Ctrl MO N-N	Non Clone- Non Clone	h3b2	15.13	554.344	213.837	1208.4	24.513
Ctrl MO N-N	Non Clone- Non Clone	h3b2	15.13	508.745	187.313	1653.033	24.513
Ctrl MO N-N	Non Clone- Non Clone	h3b2	15.13	433.19	185.292	1266.14	24.513
Ctrl MO N-N	Non Clone- Non Clone
Ctrl MO N-N	Non Clone- Non Clone	h3b3	16.805	517.523	150.619	1132.34	27.236
Ctrl MO N-N	Non Clone- Non Clone	h3b3	16.805	603.859	194.652	1439.509	27.236
Ctrl MO N-N	Non Clone- Non Clone	h3b3	16.805	694.512	208.283	1551.287	27.236
Ctrl MO N-N	Non Clone- Non Clone	h3b3	16.805	742.364	236.501	1694.332	27.236
Ctrl MO N-N	Non Clone- Non Clone	h3b3	16.805	758.39	239.051	1818.858	27.236
Ctrl MO N-N	Non Clone- Non Clone	h3b3	16.805	734.365	273.996	1715.791	27.236
Ctrl MO N-N	Non Clone- Non Clone	h3b3	16.805	629.028	233.761	1659.004	27.236
Ctrl MO N-N	Non Clone- Non Clone
Ctrl MO N-N	Non Clone- Non Clone	h3b4	15.832	523.359	188.774	1090.043	25.655
Ctrl MO N-N	Non Clone- Non Clone	h3b4	15.832	604.543	213.779	1300.453	25.655
Ctrl MO N-N	Non Clone- Non Clone	h3b4	15.832	638.837	193.797	1405.88	25.655
Ctrl MO N-N	Non Clone- Non Clone	h3b4	15.832	601.139	222.903	1281.288	25.655
Ctrl MO N-N	Non Clone- Non Clone	h3b4	15.832	536.244	214.173	1121.366	25.655
Ctrl MO N-N	Non Clone- Non Clone	h3b4	15.832	467.601	212.795	975.329	25.655
Ctrl MO N-N	Non Clone- Non Clone	h3b4	15.832	428.464	193.525	916.37	25.655
Ctrl MO N-N	Non Clone- Non Clone
Ctrl MO N-N	Non Clone- Non Clone	h3b5	7.727	591.246	165.899	1336.692	12.476
Ctrl MO N-N	Non Clone- Non Clone	h3b5	7.727	696.165	195.664	1518.084	12.476
Ctrl MO N-N	Non Clone- Non Clone	h3b5	7.727	699.709	219.583	1497.207	12.476
Ctrl MO N-N	Non Clone- Non Clone	h3b5	7.727	651.956	214.892	1433.235	12.476
Ctrl MO N-N	Non Clone- Non Clone	h3b5	7.727	570.731	236.388	1297.078	12.476
Ctrl MO N-N	Non Clone- Non Clone	h3b5	7.727	479.313	185.246	1172.601	12.476
Ctrl MO N-N	Non Clone- Non Clone	h3b5	7.727	426.669	198.629	868.073	12.476
Ctrl MO N-N	Non Clone- Non Clone	h5b1	10.158	604.125	185.307	1241.418	16.43
Ctrl MO N-N	Non Clone- Non Clone	h5b1	10.158	615.907	235.44	1395.772	16.43
Ctrl MO N-N	Non Clone- Non Clone	h5b1	10.158	576.244	198.817	1116.357	16.43
Ctrl MO N-N	Non Clone- Non Clone	h5b1	10.158	567.785	261.13	1270.834	16.43
Ctrl MO N-N	Non Clone- Non Clone	h5b1	10.158	530.617	209.417	1522.703	16.43
Ctrl MO N-N	Non Clone- Non Clone
Ctrl MO N-N	Non Clone- Non Clone	h5b2	6.16	503.643	188.399	1053.817	9.928
Ctrl MO N-N	Non Clone- Non Clone	h5b2	6.16	587.155	206.829	1075.752	9.928
Ctrl MO N-N	Non Clone- Non Clone	h5b2	6.16	582.51	272.92	1286.24	9.928
Ctrl MO N-N	Non Clone- Non Clone	h5b2	6.16	470.463	188.413	1110.861	9.928
Ctrl MO N-N	Non Clone- Non Clone	h5b2	6.16	357.939	160.996	1194.286	9.928
Ctrl MO N-N	Non Clone- Non Clone
Ctrl MO N-N	Non Clone- Non Clone	h5b3	11.779	589.645	210.434	1073.929	19.065
Ctrl MO N-N	Non Clone- Non Clone	h5b3	11.779	676.635	257.774	1357.414	19.065
Ctrl MO N-N	Non Clone- Non Clone	h5b3	11.779	613.508	278.971	1476.719	19.065
Ctrl MO N-N	Non Clone- Non Clone	h5b3	11.779	469.492	173.968	1522.725	19.065
Ctrl MO N-N	Non Clone- Non Clone	h5b3	11.779	382.895	161.302	1374.914	19.065
Ctrl MO N-N	Non Clone- Non Clone
Ctrl MO N-N	Non Clone- Non Clone	h5b4	8.97	553.692	176.668	1152.76	14.497
Ctrl MO N-N	Non Clone- Non Clone	h5b4	8.97	645.913	209.974	1407.454	14.497
Ctrl MO N-N	Non Clone- Non Clone	h5b4	8.97	662.18	219.803	1381.709	14.497
Ctrl MO N-N	Non Clone- Non Clone	h5b4	8.97	593.544	235.394	1318.233	14.497
Ctrl MO N-N	Non Clone- Non Clone	h5b4	8.97	511.655	193.176	1129.938	14.497
Ctrl MO N-N	Non Clone- Non Clone
Ctrl MO N-N	Non Clone- Non Clone	h5b5	12.482	398.812	124.901	943.776	20.207
Ctrl MO N-N	Non Clone- Non Clone	h5b5	12.482	467.493	134.242	1369.674	20.207
Ctrl MO N-N	Non Clone- Non Clone	h5b5	12.482	488.4	159.297	1308.894	20.207
Ctrl MO N-N	Non Clone- Non Clone	h5b5	12.482	470.605	172.497	1206.605	20.207
Ctrl MO N-N	Non Clone- Non Clone	h5b5	12.482	412.017	198.342	982.904	20.207
Ctrl MO N-N	Non Clone- Non Clone	h5b5	12.482	390.125	173.765	1117.452	20.207
Ctrl MO N-N	Non Clone- Non Clone
Ctrl MO N-N	Non Clone- Non Clone	h5b6	5.025	597.225	182.633	1090.546	8.083
Ctrl MO N-N	Non Clone- Non Clone	h5b6	5.025	715.376	285.746	1260.509	8.083
Ctrl MO N-N	Non Clone- Non Clone	h5b6	5.025	756.673	341.614	1397.634	8.083
Ctrl MO N-N	Non Clone- Non Clone	h5b6	5.025	736.046	315.408	1285.827	8.083
Ctrl MO N-N	Non Clone- Non Clone	h5b6	5.025	657.066	333.909	1256.876	8.083
Ctrl MO N-N	Non Clone- Non Clone	h5b6	5.025	551.313	257.225	1397.648	8.083
Ctrl MO N-N	Non Clone- Non Clone
Ctrl MO N-N	Non Clone- Non Clone	h5b7	8.916	593.94	198.577	1172.321	14.409
Ctrl MO N-N	Non Clone- Non Clone	h5b7	8.916	644.411	249.257	1246.322	14.409
Ctrl MO N-N	Non Clone- Non Clone	h5b7	8.916	646.092	232.365	1435.502	14.409
Ctrl MO N-N	Non Clone- Non Clone	h5b7	8.916	602.475	211.297	1363.361	14.409
Ctrl MO N-N	Non Clone- Non Clone	h5b7	8.916	554.925	180.602	1143.986	14.409
Ctrl MO N-N	Non Clone- Non Clone	h6b1	12.806	1072.423	240.676	2664.022	20.735
Ctrl MO N-N	Non Clone- Non Clone	h6b1	12.806	1047.113	291.479	2428.49	20.735
Ctrl MO N-N	Non Clone- Non Clone	h6b1	12.806	961.35	277.69	2077.56	20.735
Ctrl MO N-N	Non Clone- Non Clone	h6b1	12.806	904.65	336.416	1854.092	20.735
Ctrl MO N-N	Non Clone- Non Clone	h6b1	12.806	850.014	398.664	1948.651	20.735
Ctrl MO N-N	Non Clone- Non Clone	h6b1	12.806	720.63	276.513	1614.8	20.735
Ctrl MO N-N	Non Clone- Non Clone	h6b1	12.806	565.44	227.722	1247.154	20.735
Ctrl MO N-N	Non Clone- Non Clone
Ctrl MO N-N	Non Clone- Non Clone	h6b2	18.588	988.375	247.993	2384.444	30.136
Ctrl MO N-N	Non Clone- Non Clone	h6b2	18.588	1011.858	290.392	2207.362	30.136
Ctrl MO N-N	Non Clone- Non Clone	h6b2	18.588	952.478	302.229	2080.087	30.136
Ctrl MO N-N	Non Clone- Non Clone	h6b2	18.588	756.907	244.126	1748.636	30.136
Ctrl MO N-N	Non Clone- Non Clone	h6b2	18.588	544.579	202.582	1238.611	30.136
Ctrl MO N-N	Non Clone- Non Clone	h6b2	18.588	416.838	189.265	843.471	30.136
Ctrl MO N-N	Non Clone- Non Clone	h6b2	18.588	376.176	189.317	940.511	30.136
Ctrl MO N-N	Non Clone- Non Clone	h6b2	18.588	668.632	236.094	1737.844	30.136
Ctrl MO N-N	Non Clone- Non Clone	h6b2	18.588	597.376	209.03	1420.927	30.136
Ctrl MO N-N	Non Clone- Non Clone	h6b2	18.588	455.463	141.322	1051.686	30.136
Ctrl MO N-N	Non Clone- Non Clone
Ctrl MO N-N	Non Clone- Non Clone	h6b3	8.754	508.784	167.51	1470.647	14.145
Ctrl MO N-N	Non Clone- Non Clone	h6b3	8.754	543.394	149.737	1478.347	14.145
Ctrl MO N-N	Non Clone- Non Clone	h6b3	8.754	551.699	157.372	1628.848	14.145
Ctrl MO N-N	Non Clone- Non Clone	h6b3	8.754	550.498	136.065	1713.917	14.145
Ctrl MO N-N	Non Clone- Non Clone	h6b3	8.754	565.071	168.08	1491.956	14.145
Ctrl MO N-N	Non Clone- Non Clone	h6b3	8.754	620.871	200.059	1470.711	14.145
Ctrl MO N-N	Non Clone- Non Clone	h6b3	8.754	719.155	226.096	1511.609	14.145
Ctrl MO N-N	Non Clone- Non Clone	h6b3	8.754	802.201	241.924	1684.99	14.145
Ctrl MO N-N	Non Clone- Non Clone	h6b3	8.754	788.04	237.627	1957.111	14.145
Ctrl MO N-N	Non Clone- Non Clone
Ctrl MO N-N	Non Clone- Non Clone	h6b4	9.078	818.962	203.737	1858.378	14.672
Ctrl MO N-N	Non Clone- Non Clone	h6b4	9.078	935.774	205.233	2539.094	14.672
Ctrl MO N-N	Non Clone- Non Clone	h6b4	9.078	941.616	213.615	2599.579	14.672
Ctrl MO N-N	Non Clone- Non Clone	h6b4	9.078	876.72	204.808	2222.483	14.672
Ctrl MO N-N	Non Clone- Non Clone	h6b4	9.078	861.126	263.017	1953.662	14.672
Ctrl MO N-N	Non Clone- Non Clone	h6b4	9.078	870.056	329.317	1717.32	14.672
Ctrl MO N-N	Non Clone- Non Clone	h6b4	9.078	843.594	318.885	1676.096	14.672
Ctrl MO N-N	Non Clone- Non Clone	h6b4	9.078	756.78	287.311	1861.755	14.672
Ctrl MO N-N	Non Clone- Non Clone	h7b1	9.186	535.547	228.522	1170.399	14.848
Ctrl MO N-N	Non Clone- Non Clone	h7b1	9.186	602.519	268.157	1489.304	14.848
Ctrl MO N-N	Non Clone- Non Clone	h7b1	9.186	646.655	276.3	1494.468	14.848
Ctrl MO N-N	Non Clone- Non Clone	h7b1	9.186	781.529	373.114	1459.738	14.848
Ctrl MO N-N	Non Clone- Non Clone	h7b1	9.186	741.738	354.333	1373.547	14.848
Ctrl MO N-N	Non Clone- Non Clone	h7b1	9.186	662.242	295.138	1239.755	14.848
Ctrl MO N-N	Non Clone- Non Clone	h7b1	9.186	582.865	302.848	1131.262	14.848
Ctrl MO N-N	Non Clone- Non Clone	h7b1	9.186	528.835	247.985	1181.624	14.848
Ctrl MO N-N	Non Clone- Non Clone	h7b1	9.186	479.291	240.595	1090.042	14.848
Ctrl MO N-N	Non Clone- Non Clone
Ctrl MO N-N	Non Clone- Non Clone	h7b2	14.211	672.309	224.512	1351.911	23.019
Ctrl MO N-N	Non Clone- Non Clone	h7b2	14.211	705.447	231.208	1317.198	23.019
Ctrl MO N-N	Non Clone- Non Clone	h7b2	14.211	710.151	232.355	1372.149	23.019
Ctrl MO N-N	Non Clone- Non Clone	h7b2	14.211	692.228	215.797	1311.27	23.019
Ctrl MO N-N	Non Clone- Non Clone	h7b2	14.211	670.633	207.433	1212.394	23.019
Ctrl MO N-N	Non Clone- Non Clone	h7b2	14.211	624.872	195.762	1283.254	23.019
Ctrl MO N-N	Non Clone- Non Clone	h7b2	14.211	567.976	177.078	1316.938	23.019
Ctrl MO N-N	Non Clone- Non Clone
Ctrl MO N-N	Non Clone- Non Clone	h7b3	10.699	490.132	159.931	1204.859	17.308
Ctrl MO N-N	Non Clone- Non Clone	h7b3	10.699	512.188	175.416	1277.017	17.308
Ctrl MO N-N	Non Clone- Non Clone	h7b3	10.699	505.527	215.535	1248.113	17.308
Ctrl MO N-N	Non Clone- Non Clone	h7b3	10.699	483.516	201.319	1126.187	17.308
Ctrl MO N-N	Non Clone- Non Clone	h7b3	10.699	466.669	174.886	1098.699	17.308
Ctrl MO N-N	Non Clone- Non Clone	h7b3	10.699	444.992	188.311	1090.556	17.308
Ctrl MO N-N	Non Clone- Non Clone	h7b3	10.699	418.329	151.972	1007.698	17.308
Ctrl MO N-N	Non Clone- Non Clone
Ctrl MO N-N	Non Clone- Non Clone	h7b4	8.7	506.58	187.908	1116.637	14.057
Ctrl MO N-N	Non Clone- Non Clone	h7b4	8.7	553.896	201.234	1197.213	14.057
Ctrl MO N-N	Non Clone- Non Clone	h7b4	8.7	598.346	185.801	1443.966	14.057
Ctrl MO N-N	Non Clone- Non Clone	h7b4	8.7	642.092	194.339	1430.009	14.057
Ctrl MO N-N	Non Clone- Non Clone	h7b4	8.7	637.335	183.74	1332.592	14.057
Ctrl MO N-N	Non Clone- Non Clone	h7b4	8.7	623.486	193.665	1395.329	14.057
Ctrl MO N-N	Non Clone- Non Clone	h7b4	8.7	594.539	209.293	1260.492	14.057
Ctrl MO N-N	Non Clone- Non Clone
Ctrl MO N-N	Non Clone- Non Clone	h7b5	10.537	420.406	181.519	929.936	17.045
Ctrl MO N-N	Non Clone- Non Clone	h7b5	10.537	426.582	136.72	1078.962	17.045
Ctrl MO N-N	Non Clone- Non Clone	h7b5	10.537	428.489	178.368	886.664	17.045
Ctrl MO N-N	Non Clone- Non Clone	h7b5	10.537	412.311	162.354	890.076	17.045
Ctrl MO N-N	Non Clone- Non Clone	h7b5	10.537	401.427	191.87	792.456	17.045
Ctrl MO N-N	Non Clone- Non Clone	h7b5	10.537	383.102	127.161	795.257	17.045
Ctrl MO N-N	Non Clone- Non Clone	h7b5	10.537	366.858	161.319	752.578	17.045
Ctrl MO N-N	Non Clone- Non Clone	h8b1	5.674	594.095	168.222	1928.62	9.137
Ctrl MO N-N	Non Clone- Non Clone	h8b1	5.674	604.74	183.866	1694.471	9.137
Ctrl MO N-N	Non Clone- Non Clone	h8b1	5.674	594.216	188.352	1616.208	9.137
Ctrl MO N-N	Non Clone- Non Clone	h8b1	5.674	846.77	177.989	1703.048	9.137
Ctrl MO N-N	Non Clone- Non Clone	h8b1	5.674	843.881	197.942	1876.328	9.137
Ctrl MO N-N	Non Clone- Non Clone	h8b1	5.674	858.232	245.484	1872.807	9.137
Ctrl MO N-N	Non Clone- Non Clone	h8b1	5.674	810.335	254.501	1710.854	9.137
Ctrl MO N-N	Non Clone- Non Clone	h8b1	5.674	649.452	251.16	1447.86	9.137
Ctrl MO N-N	Non Clone- Non Clone	h8b1	5.674	490.78	223.541	1082.058	9.137
Ctrl MO N-N	Non Clone- Non Clone
Ctrl MO N-N	Non Clone- Non Clone	h8b2	10.753	634.031	157.871	1610.842	17.396
Ctrl MO N-N	Non Clone- Non Clone	h8b2	10.753	735.276	161.853	2207.129	17.396
Ctrl MO N-N	Non Clone- Non Clone	h8b2	10.753	831.399	206.876	2452.772	17.396
Ctrl MO N-N	Non Clone- Non Clone	h8b2	10.753	911.965	200.854	2370.181	17.396
Ctrl MO N-N	Non Clone- Non Clone	h8b2	10.753	916.936	201.732	2281.199	17.396
Ctrl MO N-N	Non Clone- Non Clone	h8b2	10.753	916.444	248.063	2291.553	17.396
Ctrl MO N-N	Non Clone- Non Clone	h8b2	10.753	903.842	238.681	2164.054	17.396
Ctrl MO N-N	Non Clone- Non Clone	h8b2	10.753	861.749	277.62	1899.507	17.396
Ctrl MO N-N	Non Clone- Non Clone
Ctrl MO N-N	Non Clone- Non Clone	h8b3	10.321	759.83	211.493	1913.758	16.693
Ctrl MO N-N	Non Clone- Non Clone	h8b3	10.321	840.842	220.336	2138.101	16.693
Ctrl MO N-N	Non Clone- Non Clone	h8b3	10.321	835.383	206.573	1934.571	16.693
Ctrl MO N-N	Non Clone- Non Clone	h8b3	10.321	800.995	233.894	1865.686	16.693
Ctrl MO N-N	Non Clone- Non Clone	h8b3	10.321	752.726	211.12	1795.052	16.693
Ctrl MO N-N	Non Clone- Non Clone
Ctrl MO N-N	Non Clone- Non Clone	h8b4	11.131	541.292	176.473	1157.661	18.011
Ctrl MO N-N	Non Clone- Non Clone	h8b4	11.131	678.88	218.581	1602.079	18.011
Ctrl MO N-N	Non Clone- Non Clone	h8b4	11.131	810.912	214.247	1820.726	18.011
Ctrl MO N-N	Non Clone- Non Clone	h8b4	11.131	828.355	264.318	2022.788	18.011
Ctrl MO N-N	Non Clone- Non Clone	h8b4	11.131	798.318	273.318	1992.882	18.011
Ctrl MO N-N	Non Clone- Non Clone	h8b4	11.131	750.245	242.141	1848.868	18.011
Ctrl MO N-N	Non Clone- Non Clone
Ctrl MO N-N	Non Clone- Non Clone	h8b5	6.646	775.468	276.84	1911.62	10.719
Ctrl MO N-N	Non Clone- Non Clone	h8b5	6.646	886.791	304.082	2118.141	10.719
Ctrl MO N-N	Non Clone- Non Clone	h8b5	6.646	1163.293	323.911	2003.533	10.719
Ctrl MO N-N	Non Clone- Non Clone	h8b5	6.646	1081.491	453.41	1658.76	10.719
Ctrl MO N-N	Non Clone- Non Clone	h8b5	6.646	927.238	364.628	1941.864	10.719
Ctrl MO N-N	Non Clone- Non Clone	h8b5	6.646	756.46	381.656	1873.168	10.719
Ctrl MO N-N	Non Clone- Non Clone	h8b5	6.646	632.189	293.645	1322.03	10.719
Ctrl MO N-N	Non Clone- Non Clone	h8b5	6.646	521.049	213.633	1181.608	10.719
Ctrl MO N-N	Non Clone- Non Clone
Ctrl MO N-N	Non Clone- Non Clone	h8b6	10.915	623.349	202.257	1252.294	17.66
Ctrl MO N-N	Non Clone- Non Clone	h8b6	10.915	721.853	219.834	1435.01	17.66
Ctrl MO N-N	Non Clone- Non Clone	h8b6	10.915	815.583	214.925	1777.96	17.66
Ctrl MO N-N	Non Clone- Non Clone	h8b6	10.915	862.279	200.864	2115.047	17.66
Ctrl MO N-N	Non Clone- Non Clone	h8b6	10.915	852.74	213.917	2002.623	17.66
Ctrl MO N-N	Non Clone- Non Clone	h8b6	10.915	836.703	235.972	2008.439	17.66
Ctrl MO N-N	Non Clone- Non Clone	h8b6	10.915	834.945	225.691	1760.347	17.66
Ctrl MO N-N	Non Clone- Non Clone	h8b6	10.915	818.076	255.069	1567.821	17.66
Ctrl MO N-N	Non Clone- Non Clone	h8b6	10.915	785.462	301.352	1669.286	17.66
Ecad MO C-C	Clone- Clone	h1b1	17.399	542.75	172.231	1184.22	28.203
Ecad MO C-C	Clone- Clone	h1b1	17.399	596.25	199.589	1288.914	28.203
Ecad MO C-C	Clone- Clone	h1b1	17.399	661.296	235.004	1544.658	28.203
Ecad MO C-C	Clone- Clone	h1b1	17.399	705.899	252.09	1572.919	28.203
Ecad MO C-C	Clone- Clone	h1b1	17.399	701.836	230.074	1598.558	28.203
Ecad MO C-C	Clone- Clone	h1b1	17.399	665.85	254.765	1486.128	28.203
Ecad MO C-C	Clone- Clone	h1b1	17.399	626.814	214.456	1473.067	28.203
Ecad MO C-C	Clone- Clone	h1b1	17.399	582.413	205.704	1308.525	28.203
Ecad MO C-C	Clone- Clone	h1b1	17.399	557.114	231.816	1299.875	28.203
Ecad MO C-C	Clone- Clone
Ecad MO C-C	Clone- Clone	h1b2	5.998	312.745	145.516	687.999	9.664
Ecad MO C-C	Clone- Clone	h1b2	5.998	353.637	145.707	694.755	9.664
Ecad MO C-C	Clone- Clone	h1b2	5.998	379.684	124.826	880.428	9.664
Ecad MO C-C	Clone- Clone	h1b2	5.998	405.5	193.676	1050.764	9.664
Ecad MO C-C	Clone- Clone	h1b2	5.998	425.392	192.896	915.978	9.664
Ecad MO C-C	Clone- Clone	h1b2	5.944	666.997	229.046	1517.956	9.577
Ecad MO C-C	Clone- Clone	h1b2	5.944	650.429	204.167	1420.927	9.577
Ecad MO C-C	Clone- Clone	h1b2	5.944	584.261	220.955	1444.696	9.577
Ecad MO C-C	Clone- Clone	h1b2	5.944	482.87	185.2	1329.562	9.577
Ecad MO C-C	Clone- Clone
Ecad MO C-C	Clone- Clone	h1b3	9.186	677.061	282.18	1370.446	14.848
Ecad MO C-C	Clone- Clone	h1b3	9.186	757.447	294.421	1704.459	14.848
Ecad MO C-C	Clone- Clone	h1b3	9.186	785.302	242.706	1682.19	14.848
Ecad MO C-C	Clone- Clone	h1b3	9.186	744.512	244.649	1650.43	14.848
Ecad MO C-C	Clone- Clone	h1b3	9.186	685.548	277.574	1628.816	14.848
Ecad MO C-C	Clone- Clone	h1b3	9.186	613.628	267.444	1330.584	14.848
Ecad MO C-C	Clone- Clone	h1b3	9.348	622.561	254.159	1168.199	15.112
Ecad MO C-C	Clone- Clone	h1b3	9.348	593.971	246.445	1217.826	15.112
Ecad MO C-C	Clone- Clone	h1b3	9.348	552.349	198.576	1171	15.112
Ecad MO C-C	Clone- Clone	h1b3	9.348	499.812	192.11	1216.205	15.112
Ecad MO C-C	Clone- Clone	h1b3	9.348	441.573	141.267	1829.034	15.112
Ecad MO C-C	Clone- Clone	h2b1	17.129	1985.153	281.721	2779	27.763
Ecad MO C-C	Clone- Clone	h2b1	17.129	667.389	300.977	1544.197	27.763
Ecad MO C-C	Clone- Clone	h2b1	17.129	801.669	366.913	1671.46	27.763
Ecad MO C-C	Clone- Clone	h2b1	17.129	913.58	357.779	2004.316	27.763
Ecad MO C-C	Clone- Clone	h2b1	17.129	1050.801	469.418	2049.559	27.763
Ecad MO C-C	Clone- Clone	h2b1	17.129	1138.85	451.572	2481.708	27.763
Ecad MO C-C	Clone- Clone	h2b1	17.129	993.639	391.197	2173.935	27.763
Ecad MO C-C	Clone- Clone
Ecad MO C-C	Clone- Clone	h2b2	11.239	683.019	207.654	1350.434	18.187
Ecad MO C-C	Clone- Clone	h2b2	11.239	798.489	243.688	1710.628	18.187
Ecad MO C-C	Clone- Clone	h2b2	11.239	862.511	291.604	1895.82	18.187
Ecad MO C-C	Clone- Clone	h2b2	11.239	915.158	301.35	1977.957	18.187
Ecad MO C-C	Clone- Clone	h2b2	11.239	1077.266	362.1	2144.393	18.187
Ecad MO C-C	Clone- Clone	h2b2	11.239	1106.562	478.75	2327.559	18.187
Ecad MO C-C	Clone- Clone	h2b2	11.239	991.224	380.351	2002.455	18.187
Ecad MO C-C	Clone- Clone	h2b2	11.239	859.374	339.038	2063.501	18.187
Ecad MO C-C	Clone- Clone	h2b2	11.239	769.187	304.125	1998.188	18.187
Ecad MO C-C	Clone- Clone
Ecad MO C-C	Clone- Clone	h2b3	11.023	590.703	176.993	1327.026	17.835
Ecad MO C-C	Clone- Clone	h2b3	11.023	759.525	207.258	1761.056	17.835
Ecad MO C-C	Clone- Clone	h2b3	11.023	918.305	213.882	2196.595	17.835
Ecad MO C-C	Clone- Clone	h2b3	11.023	1002.292	252.572	2459.456	17.835
Ecad MO C-C	Clone- Clone	h2b3	11.023	1045.017	284.577	2203.882	17.835
Ecad MO C-C	Clone- Clone	h2b3	11.023	1025.475	301.58	2296.272	17.835
Ecad MO C-C	Clone- Clone	h2b3	11.023	921.597	341.92	1922.189	17.835
Ecad MO C-C	Clone- Clone	h2b3	11.023	796.744	311.131	1927.689	17.835
Ecad MO C-C	Clone- Clone
Ecad MO C-C	Clone- Clone	h2b4	8.051	542.051	224.388	996.307	13.003
Ecad MO C-C	Clone- Clone	h2b4	8.051	628.625	209.427	1257.64	13.003
Ecad MO C-C	Clone- Clone	h2b4	8.051	690.208	281.238	1539.891	13.003
Ecad MO C-C	Clone- Clone	h2b4	8.051	761.776	306.774	1865.092	13.003
Ecad MO C-C	Clone- Clone	h2b4	8.7	1041.361	373.706	2045.312	14.057
Ecad MO C-C	Clone- Clone	h2b4	8.7	970.592	335.818	1932.405	14.057
Ecad MO C-C	Clone- Clone	h2b4	8.7	826.583	299.266	1605.525	14.057
Ecad MO C-C	Clone- Clone	h2b4	8.7	703.324	270.913	1380.339	14.057
Ecad MO C-C	Clone- Clone	h3b1	9.51	900.213	321.212	1771.826	15.375
Ecad MO C-C	Clone- Clone	h3b1	9.51	968.536	308.971	1998.436	15.375
Ecad MO C-C	Clone- Clone	h3b1	9.51	993.048	374.065	2224.284	15.375
Ecad MO C-C	Clone- Clone	h3b1	9.51	1057.779	456.114	2127.646	15.375
Ecad MO C-C	Clone- Clone	h3b1	9.51	1023.384	404.573	2401.66	15.375
Ecad MO C-C	Clone- Clone
Ecad MO C-C	Clone- Clone	h3b2	8.321	923.073	328.474	1978.23	13.442
Ecad MO C-C	Clone- Clone	h3b2	8.321	972.815	299.06	2127.634	13.442
Ecad MO C-C	Clone- Clone	h3b2	8.321	941.56	440.095	2134.8	13.442
Ecad MO C-C	Clone- Clone	h3b2	8.321	836.208	374.356	2095.635	13.442
Ecad MO C-C	Clone- Clone	h3b2	8.321	715.445	278.932	1864.17	13.442
Ecad MO C-C	Clone- Clone
Ecad MO C-C	Clone- Clone	h3b3	2.323	575.343	239.524	1213.569	3.69
Ecad MO C-C	Clone- Clone	h3b3	2.323	641.78	294.844	1458.06	3.69
Ecad MO C-C	Clone- Clone	h3b3	2.323	674.577	350.908	1621.547	3.69
Ecad MO C-C	Clone- Clone	h3b3	2.432	942.766	455.659	1488.725	3.866
Ecad MO C-C	Clone- Clone	h3b3	2.432	769.93	462.418	1243.786	3.866
Ecad MO C-C	Clone- Clone	h3b3	2.432	649.662	371.872	1090.124	3.866
Ecad MO C-C	Clone- Clone
Ecad MO C-C	Clone- Clone	h3b4	8.429	964.6	392.199	1633.425	13.618
Ecad MO C-C	Clone- Clone	h3b4	8.429	1041.884	446.189	1925.612	13.618
Ecad MO C-C	Clone- Clone	h3b4	8.429	1089.393	655.735	2040.053	13.618
Ecad MO C-C	Clone- Clone	h3b4	8.429	1070.355	597.046	1841.313	13.618
Ecad MO C-C	Clone- Clone	h3b4	8.429	978.526	538.783	1641.404	13.618
Ecad MO C-C	Clone- Clone	h3b4	8.429	874.629	451.241	1729.862	13.618
Ecad MO C-C	Clone- Clone
Ecad MO C-C	Clone- Clone	h4b1	11.239	853.766	240.597	1674.322	18.187
Ecad MO C-C	Clone- Clone	h4b1	11.239	907.805	217.258	1865.778	18.187
Ecad MO C-C	Clone- Clone	h4b1	11.239	977.705	231.237	2034.168	18.187
Ecad MO C-C	Clone- Clone	h4b1	11.239	975.238	261.732	2004.135	18.187
Ecad MO C-C	Clone- Clone	h4b1	11.239	946.681	202.928	1969.603	18.187
Ecad MO C-C	Clone- Clone	h4b1	11.563	944.897	357.714	2656.668	18.714
Ecad MO C-C	Clone- Clone	h4b1	11.563	969.25	375.827	2235.427	18.714
Ecad MO C-C	Clone- Clone	h4b1	11.563	895.09	358.807	2034.667	18.714
Ecad MO C-C	Clone- Clone	h4b1	11.563	770.112	274.181	1870.702	18.714
Ecad MO C-C	Clone- Clone
Ecad MO C-C	Clone- Clone	h4b2	2.594	516.007	258.105	1079.847	4.129
Ecad MO C-C	Clone- Clone	h4b2	2.594	615.207	306.466	1138.532	4.129
Ecad MO C-C	Clone- Clone	h4b2	2.594	681.277	269.799	1138.261	4.129
Ecad MO C-C	Clone- Clone	h4b2	2.594	796.088	241.077	1261.304	4.129
Ecad MO C-C	Clone- Clone	h4b2	2.594	872.555	353.268	1516.058	4.129
Ecad MO C-C	Clone- Clone	h4b2	2.594	876.928	346.465	1553.684	4.129
Ecad MO C-C	Clone- Clone	h4b2	2.594	843.295	361.303	1478.967	4.129
Ecad MO C-C	Clone- Clone	h4b2	2.594	746.151	348.977	1467.591	4.129
Ecad MO C-C	Clone- Clone	h4b2	2.594	614.991	308.499	1221.248	4.129
Ecad MO C-C	Clone- Clone
Ecad MO C-C	Clone- Clone	h4b3	12.32	615.881	242.093	1420.572	19.944
Ecad MO C-C	Clone- Clone	h4b3	12.32	664.36	214.746	1656.109	19.944
Ecad MO C-C	Clone- Clone	h4b3	12.32	718.288	288.051	1824.023	19.944
Ecad MO C-C	Clone- Clone	h4b3	12.32	698.342	274.413	1732.411	19.944
Ecad MO C-C	Clone- Clone	h4b3	11.293	934.945	266.052	2153.399	18.275
Ecad MO C-C	Clone- Clone	h4b3	11.293	922.813	272.977	1866.33	18.275
Ecad MO C-C	Clone- Clone	h4b3	11.293	889.766	275.533	1938.323	18.275
Ecad MO C-C	Clone- Clone	h4b3	11.293	793.194	326.256	1908.756	18.275
Ecad MO C-C	Clone- Clone	h4b3	11.293	678.049	271.783	1831.899	18.275
Ecad MO C-C	Clone- Clone	h4b3	11.293	564.767	208.893	1499.31	18.275
Ecad MO C-C	Clone- Clone
Ecad MO C-C	Clone- Clone	h4b4	7.078	589.972	198.056	1101.779	11.422
Ecad MO C-C	Clone- Clone	h4b4	7.078	770.857	216.776	1484.601	11.422
Ecad MO C-C	Clone- Clone	h4b4	7.078	854.772	192.935	1737.415	11.422
Ecad MO C-C	Clone- Clone	h4b4	7.078	955.673	228.602	1971.925	11.422
Ecad MO C-C	Clone- Clone	h4b4	7.078	984.461	225.639	2043.206	11.422
Ecad MO C-C	Clone- Clone	h4b4	7.078	975.069	266.699	2151.051	11.422
Ecad MO C-C	Clone- Clone	h4b4	7.078	909.066	261.451	1915.752	11.422
Ecad MO C-C	Clone- Clone	h4b4	7.078	803.588	238.835	1852.363	11.422
Ecad MO C-C	Clone- Clone	h4b4	7.078	669.385	307.118	1401.821	11.422
Ecad MO C-C	Clone- Clone	h4b4	7.078	508.163	245.885	1010.19	11.422
Ecad MO C-C	Clone- Clone	h5b1	12.968	936.425	251.895	1972.656	20.995
Ecad MO C-C	Clone- Clone	h5b1	12.968	1042.813	290.317	2084.939	20.995
Ecad MO C-C	Clone- Clone	h5b1	12.968	1048.885	363.035	1890.829	20.995
Ecad MO C-C	Clone- Clone	h5b1	12.968	1038.312	325.407	1847.095	20.995
Ecad MO C-C	Clone- Clone	h5b1	12.968	996.635	362.119	1904.783	20.995
Ecad MO C-C	Clone- Clone	h5b1	12.968	952.405	325.161	2114.749	20.995
Ecad MO C-C	Clone- Clone	h5b1	12.968	887.325	347.431	2011.646	20.995
Ecad MO C-C	Clone- Clone	h5b1	12.968	829.133	374.11	1939.878	20.995
Ecad MO C-C	Clone- Clone	h5b1	12.968	751.718	320.355	1861.644	20.995
Ecad MO C-C	Clone- Clone
Ecad MO C-C	Clone- Clone	h5b2	5.674	917.481	260.011	1988.017	9.137
Ecad MO C-C	Clone- Clone	h5b2	5.674	973.254	266.611	2053.666	9.137
Ecad MO C-C	Clone- Clone	h5b2	5.674	1002.727	285.429	1936.19	9.137
Ecad MO C-C	Clone- Clone	h5b2	5.674	995.752	303.546	2134.895	9.137
Ecad MO C-C	Clone- Clone	h5b2	5.674	970.515	345.065	1953.032	9.137
Ecad MO C-C	Clone- Clone	h5b2	5.674	930.639	339.665	1658.959	9.137
Ecad MO C-C	Clone- Clone	h5b2	5.674	880.705	315.196	1660.895	9.137
Ecad MO C-C	Clone- Clone	h5b2	5.674	819.131	329.5	1704.434	9.137
Ecad MO C-C	Clone- Clone	h5b2	5.674	744.123	347.282	1452.562	9.137
Ecad MO C-C	Clone- Clone	h5b2	5.674	651.978	280.527	1481.138	9.137
Ecad MO C-C	Clone- Clone
Ecad MO C-C	Clone- Clone	h5b3	12.698	1008.905	263.189	2103.537	20.558
Ecad MO C-C	Clone- Clone	h5b3	12.698	1070.08	217.315	2137.169	20.558
Ecad MO C-C	Clone- Clone	h5b3	12.698	1076.546	275.46	2079.755	20.558
Ecad MO C-C	Clone- Clone	h5b3	12.698	1045.746	292.09	1999.799	20.558
Ecad MO C-C	Clone- Clone	h5b3	12.698	1004.295	305.322	2062.318	20.558
Ecad MO C-C	Clone- Clone	h5b3	12.698	959.6	287.447	1874.787	20.558
Ecad MO C-C	Clone- Clone	h5b3	12.698	897.925	266.558	2093.614	20.558
Ecad MO C-C	Clone- Clone	h5b3	12.698	826.983	278.899	1937.643	20.558
Ecad MO C-C	Clone- Clone	h5b3	12.698	737.136	252.612	1909.097	20.558
Ecad MO C-C	Clone- Clone
Ecad MO C-C	Clone- Clone	h5b4	3.404	1023.344	423.036	1610.667	5.447
Ecad MO C-C	Clone- Clone	h5b4	3.404	1203.58	547.247	1969.522	5.447
Ecad MO C-C	Clone- Clone	h5b4	3.404	1226.873	542.205	2020.007	5.447
Ecad MO C-C	Clone- Clone	h5b4	3.404	1125.851	539.081	2282.817	5.447
Ecad MO C-C	Clone- Clone	h5b4	3.404	1039.952	553.955	1746.858	5.447
Ecad MO C-C	Clone- Clone	h5b4	3.404	902.257	494.385	1452.671	5.447
Ecad MO C-C	Clone- Clone	h5b4	3.404	745.217	370.483	1270.483	5.447
Ecad MO C-C	Clone- Clone	h5b4	3.404	587.104	281.685	1234.648	5.447
Ecad MO C-C	Clone- Clone
Ecad MO C-C	Clone- Clone	h5b5	8.321	698.28	249.639	1690.682	13.442
Ecad MO C-C	Clone- Clone	h5b5	8.321	764.807	304.027	1898.71	13.442
Ecad MO C-C	Clone- Clone	h5b5	8.321	773.958	320.976	1698.871	13.442
Ecad MO C-C	Clone- Clone	h5b5	8.321	761.622	311.445	1715.211	13.442
Ecad MO C-C	Clone- Clone	h5b5	8.321	712.483	358.424	1568.227	13.442
Ecad MO C-C	Clone- Clone	h5b5	8.321	679.941	359.198	1426.234	13.442
Ecad MO C-C	Clone- Clone	h5b5	8.321	642.331	298.782	1233.209	13.442
Ecad MO C-C	Clone- Clone	h5b5	8.321	608.39	243.655	1029.673	13.442
Ecad MO C-C	Clone- Clone	h6b1	7.403	543.35	181.411	1410.893	11.949
Ecad MO C-C	Clone- Clone	h6b1	7.403	528.968	191.711	1312.723	11.949
Ecad MO C-C	Clone- Clone	h6b1	7.403	480.475	207.896	1329.503	11.949
Ecad MO C-C	Clone- Clone	h6b1	7.403	416.611	185.944	1147.109	11.949
Ecad MO C-C	Clone- Clone	h6b1	7.403	347.136	157.895	1117.065	11.949
Ecad MO C-C	Clone- Clone	h6b1	7.403	306.014	130.051	927.473	11.949
Ecad MO C-C	Clone- Clone
Ecad MO C-C	Clone- Clone	h6b2	9.078	346.294	115.377	914.3	14.672
Ecad MO C-C	Clone- Clone	h6b2	9.078	346.294	115.377	914.3	14.672
Ecad MO C-C	Clone- Clone	h6b2	9.078	346.294	115.377	914.3	14.672
Ecad MO C-C	Clone- Clone	h6b2	9.078	403.92	130.909	1048.667	14.672
Ecad MO C-C	Clone- Clone	h6b2	9.078	440.621	131.274	1091.22	14.672
Ecad MO C-C	Clone- Clone	h6b2	9.078	473.391	148.433	1186.906	14.672
Ecad MO C-C	Clone- Clone	h6b2	9.078	517.881	167.706	1156.527	14.672
Ecad MO C-C	Clone- Clone	h6b2	9.078	545.668	160.757	1262.73	14.672
Ecad MO C-C	Clone- Clone	h6b2	9.078	529.147	187.529	1237.859	14.672
Ecad MO C-C	Clone- Clone
Ecad MO C-C	Clone- Clone	h6b3	8.267	406.856	121.455	985.284	13.355
Ecad MO C-C	Clone- Clone	h6b3	8.267	408.641	137.274	1058	13.355
Ecad MO C-C	Clone- Clone	h6b3	8.267	392.265	136.289	1029.748	13.355
Ecad MO C-C	Clone- Clone	h6b3	8.267	382.971	161.973	908.447	13.355
Ecad MO C-C	Clone- Clone	h6b3	8.267	391.365	151.836	876.61	13.355
Ecad MO C-C	Clone- Clone	h6b3	8.267	384.313	157.756	996.038	13.355
Ecad MO C-C	Clone- Clone	h6b3	8.267	374.149	177.89	1025.019	13.355
Ecad MO C-C	Clone- Clone
Ecad MO C-C	Clone- Clone	h6b4	6.538	466.686	100.453	1380.624	10.543
Ecad MO C-C	Clone- Clone	h6b4	6.538	467.2	99.642	1476.503	10.543
Ecad MO C-C	Clone- Clone	h6b4	6.538	451.192	98.362	1325.057	10.543
Ecad MO C-C	Clone- Clone	h6b4	6.538	429.885	101.138	1095.123	10.543
Ecad MO C-C	Clone- Clone	h6b4	6.538	401.279	101.223	929.082	10.543
Ecad MO C-C	Clone- Clone	h6b4	6.538	357.433	102.201	1007.295	10.543
Ecad MO C-C	Clone- Clone
Ecad MO C-C	Clone- Clone	h6b5	5.89	516.411	214.772	1142.92	9.489
Ecad MO C-C	Clone- Clone	h6b5	5.89	603.393	224.762	1219.856	9.489
Ecad MO C-C	Clone- Clone	h6b5	5.89	613.471	261.914	1172.088	9.489
Ecad MO C-C	Clone- Clone	h6b5	5.89	613.239	279.223	1196.231	9.489
Ecad MO C-C	Clone- Clone	h6b5	5.89	564.979	238.735	1399.25	9.489
Ecad MO C-C	Clone- Clone	h6b5	5.89	443.547	219.097	980.334	9.489
Ecad MO C-C	Clone- Clone
Ecad MO C-C	Clone- Clone	h6b6	9.294	455.957	151.887	1194.007	15.024
Ecad MO C-C	Clone- Clone	h6b6	9.294	472.544	159.468	1273.777	15.024
Ecad MO C-C	Clone- Clone	h6b6	9.294	487.093	154.481	1243.592	15.024
Ecad MO C-C	Clone- Clone	h6b6	9.294	461.734	186.718	948.1	15.024
Ecad MO C-C	Clone- Clone	h6b6	9.294	414.297	191.059	1026.333	15.024
Ecad MO C-C	Clone- Clone	h6b6	9.294	367.863	183.423	831.774	15.024
Ecad MO C-C	Clone- Clone
Ecad MO C-C	Clone- Clone	h6b7	6.16	353.427	150.518	836.111	9.928
Ecad MO C-C	Clone- Clone	h6b7	6.16	363.143	147.896	852.936	9.928
Ecad MO C-C	Clone- Clone	h6b7	6.16	422.596	171.769	1021.771	9.928
Ecad MO C-C	Clone- Clone	h6b7	6.16	467.043	204.979	1098.413	9.928
Ecad MO C-C	Clone- Clone	h6b7	6.16	469.544	212.875	1033.18	9.928
Ecad MO C-C	Clone- Clone	h6b7	6.16	444.961	170.184	1153.821	9.928
Ecad MO C-C	Clone- Clone	h6b7	6.16	418.665	183.151	1002.127	9.928
Ecad MO C-C	Clone- Clone	h6b7	6.16	368.484	160.181	693.246	9.928
Ecad MO C-C	Clone- Clone
Ecad MO C-C	Clone- Clone	h6b8	7.349	439.847	137.087	1186.181	11.861
Ecad MO C-C	Clone- Clone	h6b8	7.349	461.889	160.964	1208.778	11.861
Ecad MO C-C	Clone- Clone	h6b8	7.349	485.648	185.018	1084.143	11.861
Ecad MO C-C	Clone- Clone	h6b8	7.349	473.452	187.254	916.966	11.861
Ecad MO C-C	Clone- Clone	h6b8	7.349	468.7	239.84	923.668	11.861
Ecad MO C-C	Clone- Clone	h6b8	7.349	442.529	230.565	911.907	11.861
Ecad MO C-C	Clone- Clone	h6b8	7.349	406.003	173.572	992.704	11.861
Ecad MO C-C	Clone- Clone	h7b1	7.619	1833.352	782.265	3212.459	12.3
Ecad MO C-C	Clone- Clone	h7b1	7.619	1869.004	808.855	3224.141	12.3
Ecad MO C-C	Clone- Clone	h7b1	7.619	1746.236	762.082	3296.127	12.3
Ecad MO C-C	Clone- Clone	h7b1	7.619	1530.651	727.349	2824.769	12.3
Ecad MO C-C	Clone- Clone	h7b1	7.619	1341.5	588.795	3093.407	12.3
Ecad MO C-C	Clone- Clone	h7b1	7.619	1195.588	486.831	3765.345	12.3
Ecad MO C-C	Clone- Clone
Ecad MO C-C	Clone- Clone	h7b2	8.754	1545.692	696.105	3115.197	14.145
Ecad MO C-C	Clone- Clone	h7b2	8.754	1518.016	683.753	3417.573	14.145
Ecad MO C-C	Clone- Clone	h7b2	8.754	1487.07	724.872	3326.713	14.145
Ecad MO C-C	Clone- Clone	h7b2	8.754	1460.448	762.708	3312.118	14.145
Ecad MO C-C	Clone- Clone
Ecad MO C-C	Clone- Clone	h7b3	6.538	1476.208	685.553	2585.593	10.543
Ecad MO C-C	Clone- Clone	h7b3	6.538	1785.424	794.673	3142.138	10.543
Ecad MO C-C	Clone- Clone	h7b3	6.538	1864.973	845.805	3457.525	10.543
Ecad MO C-C	Clone- Clone	h7b3	6.538	1858.141	907.064	3521.722	10.543
Ecad MO C-C	Clone- Clone	h7b3	6.538	1686.367	771.543	3199.32	10.543
Ecad MO C-C	Clone- Clone	h7b3	6.538	1371.704	584.163	2957.512	10.543
Ecad MO C-C	Clone- Clone
Ecad MO C-C	Clone- Clone	h7b4	9.564	1438.6	486.424	2878.264	15.463
Ecad MO C-C	Clone- Clone	h7b4	9.564	1456.936	500.255	3246.428	15.463
Ecad MO C-C	Clone- Clone	h7b4	9.564	1451.033	632.437	3581.711	15.463
Ecad MO C-C	Clone- Clone	h7b4	9.564	1914.015	631.896	4095	15.463
Ecad MO C-C	Clone- Clone	h7b4	9.564	1901.499	650.178	4095	15.463
Ecad MO C-C	Clone- Clone	h7b4	9.564	1788.633	524.752	4070.874	15.463
Ecad MO C-C	Clone- Clone	h7b4	9.564	1625.019	414.484	4050.057	15.463
Ecad MO C-C	Clone- Clone	h7b4	9.564	1393.043	376.034	3342.368	15.463
Ecad MO C-C	Clone- Clone
Ecad MO C-C	Clone- Clone	h7b5	6.646	1534.567	645.094	2979.186	10.719
Ecad MO C-C	Clone- Clone	h7b5	6.646	1522.525	740.692	2612.807	10.719
Ecad MO C-C	Clone- Clone	h7b5	6.646	1432.048	553.953	2429.536	10.719
Ecad MO C-C	Clone- Clone	h7b5	6.646	1282.063	637.469	2135.733	10.719
Ecad MO C-C	Clone- Clone	h7b5	6.646	1154.893	554.532	2048.415	10.719
Ecad MO C-C	Clone- Clone	h7b5	6.646	1024.332	486.623	2060.015	10.719
Ecad MO C-C	Clone- Clone
Ecad MO C-C	Clone- Clone	h7b6	10.158	1602.351	620.028	3060.947	16.429
Ecad MO C-C	Clone- Clone	h7b6	10.158	1649.466	703.992	2981.702	16.429
Ecad MO C-C	Clone- Clone	h7b6	10.158	1696.664	695.495	3324.567	16.429
Ecad MO C-C	Clone- Clone	h7b6	10.158	1722.91	750.365	3302.478	16.429
Ecad MO C-C	Clone- Clone	h7b6	10.158	1619.922	734.244	3828.997	16.429
Ecad MO C-C	Clone- Clone	h7b6	10.158	1428.449	582.852	3389.073	16.429
Ecad MO C-C	Clone- Clone	h8b1	8.591	540.099	216.544	1031.161	13.882
Ecad MO C-C	Clone- Clone	h8b1	8.591	531.406	256.181	1018.717	13.882
Ecad MO C-C	Clone- Clone	h8b1	8.591	492.563	196.462	1420.29	13.882
Ecad MO C-C	Clone- Clone	h8b1	8.591	552.791	175.115	1512.034	13.882
Ecad MO C-C	Clone- Clone	h8b1	8.591	586.246	239.802	1531.796	13.882
Ecad MO C-C	Clone- Clone	h8b1	8.591	589.753	224.217	1480.869	13.882
Ecad MO C-C	Clone- Clone	h8b1	8.591	563.434	221.057	1464.613	13.882
Ecad MO C-C	Clone- Clone	h8b1	8.591	498.657	201.287	1620.898	13.882
Ecad MO C-C	Clone- Clone	h8b1	8.591	409.076	177.466	1153.879	13.882
Ecad MO C-C	Clone- Clone
Ecad MO C-C	Clone- Clone	h8b2	11.185	422.272	143.959	1107.206	18.099
Ecad MO C-C	Clone- Clone	h8b2	11.185	521.015	168.118	1527.49	18.099
Ecad MO C-C	Clone- Clone	h8b2	11.185	539.327	164.178	1594.494	18.099
Ecad MO C-C	Clone- Clone	h8b2	11.185	582.194	179.615	1542.565	18.099
Ecad MO C-C	Clone- Clone	h8b2	11.185	609.526	176.131	1506.855	18.099
Ecad MO C-C	Clone- Clone	h8b2	11.185	642.37	156.677	1298.168	18.099
Ecad MO C-C	Clone- Clone	h8b2	11.185	653.934	229.399	1610.814	18.099
Ecad MO C-C	Clone- Clone	h8b2	11.185	644.703	246.484	1893.252	18.099
Ecad MO C-C	Clone- Clone	h8b2	11.185	612.647	237.16	1657.824	18.099
Ecad MO C-C	Clone- Clone
Ecad MO C-C	Clone- Clone	h8b3	7.781	705.372	286.825	1408.944	12.564
Ecad MO C-C	Clone- Clone	h8b3	7.781	761.336	325.157	1416.134	12.564
Ecad MO C-C	Clone- Clone	h8b3	7.781	800.49	301.967	1511.053	12.564
Ecad MO C-C	Clone- Clone	h8b3	7.781	761.341	317.512	1707.614	12.564
Ecad MO C-C	Clone- Clone	h8b3	7.781	697.798	297	1505.948	12.564
Ecad MO C-C	Clone- Clone	h8b3	7.781	619.975	283.761	1424.826	12.564
Ecad MO C-C	Clone- Clone	h8b3	7.781	519.581	164.737	1217.458	12.564
Ecad MO N-C	Non Clone- Clone	h1b1	5.728	625.405	286.963	1247.756	9.225
Ecad MO N-C	Non Clone- Clone	h1b1	5.728	642.114	281.904	1375.283	9.225
Ecad MO N-C	Non Clone- Clone	h1b1	5.728	620.711	258.988	1179.299	9.225
Ecad MO N-C	Non Clone- Clone	h1b1	5.728	596.387	303.317	1243.505	9.225
Ecad MO N-C	Non Clone- Clone	h1b1	5.728	598.867	284.136	1204.091	9.225
Ecad MO N-C	Non Clone- Clone	h1b1	5.728	603.413	274.213	1080.519	9.225
Ecad MO N-C	Non Clone- Clone	h1b1	5.728	587.157	250.482	1302.022	9.225
Ecad MO N-C	Non Clone- Clone	h1b1	5.728	545.615	198.433	1368.181	9.225
Ecad MO N-C	Non Clone- Clone	h1b1	5.728	491.977	195.495	1389.161	9.225
Ecad MO N-C	Non Clone- Clone
Ecad MO N-C	Non Clone- Clone	h1b2	20.371	673.264	181.903	1983.048	33.035
Ecad MO N-C	Non Clone- Clone	h1b2	20.371	730.149	230.341	1983.141	33.035
Ecad MO N-C	Non Clone- Clone	h1b2	20.371	777.33	206.64	2286.117	33.035
Ecad MO N-C	Non Clone- Clone	h1b2	20.371	764.314	266.234	1968.91	33.035
Ecad MO N-C	Non Clone- Clone	h1b2	20.371	732.191	215.939	1715.54	33.035
Ecad MO N-C	Non Clone- Clone	h1b2	20.371	698.419	193.08	1606.858	33.035
Ecad MO N-C	Non Clone- Clone	h1b2	20.371	649.078	180.43	1546.482	33.035
Ecad MO N-C	Non Clone- Clone	h1b2	20.371	577.936	185.05	1544.02	33.035
Ecad MO N-C	Non Clone- Clone	h1b2	20.371	519.808	159.008	1313.169	33.035
Ecad MO N-C	Non Clone- Clone	h1b2	9.132	525.855	169.411	1575.014	14.76
Ecad MO N-C	Non Clone- Clone	h1b2	9.132	501.829	170.279	1543.074	14.76
Ecad MO N-C	Non Clone- Clone	h1b2	9.132	447.199	143.144	1365.541	14.76
Ecad MO N-C	Non Clone- Clone
Ecad MO N-C	Non Clone- Clone	h1b3	12.374	759.706	186.652	1881.008	20.032
Ecad MO N-C	Non Clone- Clone	h1b3	12.374	878.7	182.446	1744.256	20.032
Ecad MO N-C	Non Clone- Clone	h1b3	12.374	946.314	245.639	1941.849	20.032
Ecad MO N-C	Non Clone- Clone	h1b3	12.374	892.002	292.502	2053.285	20.032
Ecad MO N-C	Non Clone- Clone	h1b3	12.374	776.177	254.338	1859.077	20.032
Ecad MO N-C	Non Clone- Clone	h1b3	12.374	684.56	259.686	1713.554	20.032
Ecad MO N-C	Non Clone- Clone	h1b3	12.374	621.161	261.153	1467.556	20.032
Ecad MO N-C	Non Clone- Clone	h1b3	12.374	576.202	239.69	1402.376	20.032
Ecad MO N-C	Non Clone- Clone	h2b1	11.131	590.601	187.671	1393.051	18.011
Ecad MO N-C	Non Clone- Clone	h2b1	11.131	722.764	245.798	2035.499	18.011
Ecad MO N-C	Non Clone- Clone	h2b1	11.131	809.26	276.97	2007.681	18.011
Ecad MO N-C	Non Clone- Clone	h2b1	11.131	880.133	273.775	2271.364	18.011
Ecad MO N-C	Non Clone- Clone	h2b1	11.131	872.119	320.933	2251.86	18.011
Ecad MO N-C	Non Clone- Clone	h2b1	11.131	745.579	270.809	1923.304	18.011
Ecad MO N-C	Non Clone- Clone	h2b1	11.131	624.657	226.653	1891.608	18.011
Ecad MO N-C	Non Clone- Clone
Ecad MO N-C	Non Clone- Clone	h2b2	7.565	708.37	262.443	1636.307	12.212
Ecad MO N-C	Non Clone- Clone	h2b2	7.565	746.453	300.07	1608.083	12.212
Ecad MO N-C	Non Clone- Clone	h2b2	7.565	758.375	284.339	1534.612	12.212
Ecad MO N-C	Non Clone- Clone	h2b2	7.565	668.195	268.571	1382.665	12.212
Ecad MO N-C	Non Clone- Clone	h2b2	7.565	510.43	237.797	1178.747	12.212
Ecad MO N-C	Non Clone- Clone	h4b1	8.862	663.949	201.998	1290.639	14.321
Ecad MO N-C	Non Clone- Clone	h4b1	8.862	837.469	205.684	1873.773	14.321
Ecad MO N-C	Non Clone- Clone	h4b1	8.862	914.993	213.033	2011.282	14.321
Ecad MO N-C	Non Clone- Clone	h4b1	8.862	980.676	213.55	2228.392	14.321
Ecad MO N-C	Non Clone- Clone	h4b1	8.862	948.454	258.831	2048.632	14.321
Ecad MO N-C	Non Clone- Clone	h4b1	8.862	839.29	275.473	1887.238	14.321
Ecad MO N-C	Non Clone- Clone	h4b1	7.835	1110.024	326.152	2404.449	12.652
Ecad MO N-C	Non Clone- Clone	h4b1	7.835	1039.204	351.626	2640.765	12.652
Ecad MO N-C	Non Clone- Clone	h4b1	7.835	896.51	298.661	2570.977	12.652
Ecad MO N-C	Non Clone- Clone	h4b1	7.835	712.265	256.061	1773.475	12.652
Ecad MO N-C	Non Clone- Clone	h4b1	7.835	538.093	218.37	1068.942	12.652
Ecad MO N-C	Non Clone- Clone
Ecad MO N-C	Non Clone- Clone	h4b2	10.807	709.71	217.221	1644.149	17.484
Ecad MO N-C	Non Clone- Clone	h4b2	10.807	756.883	213.263	1948.851	17.484
Ecad MO N-C	Non Clone- Clone	h4b2	10.807	780.205	206.101	1822.371	17.484
Ecad MO N-C	Non Clone- Clone	h4b2	10.807	774.28	245.57	1905.707	17.484
Ecad MO N-C	Non Clone- Clone	h4b2	10.807	741.427	288.953	1759.6	17.484
Ecad MO N-C	Non Clone- Clone	h4b2	10.807	691.371	243.289	1733.196	17.484
Ecad MO N-C	Non Clone- Clone	h4b2	10.807	631.942	274.771	1236.404	17.484
Ecad MO N-C	Non Clone- Clone	h4b2	10.807	559.51	207.826	1372.606	17.484
Ecad MO N-C	Non Clone- Clone
Ecad MO N-C	Non Clone- Clone	h4b3	7.781	760.536	253.432	1524.996	12.564
Ecad MO N-C	Non Clone- Clone	h4b3	7.781	792.773	235.153	1675.883	12.564
Ecad MO N-C	Non Clone- Clone	h4b3	7.781	855.743	226.608	1730.79	12.564
Ecad MO N-C	Non Clone- Clone	h4b3	7.781	850.104	252.448	1698.016	12.564
Ecad MO N-C	Non Clone- Clone	h4b3	7.781	848.401	286.1	2006.778	12.564
Ecad MO N-C	Non Clone- Clone	h4b3	7.781	841.21	303.05	1909.359	12.564
Ecad MO N-C	Non Clone- Clone	h4b3	7.781	816.064	309.662	1797.069	12.564
Ecad MO N-C	Non Clone- Clone	h4b3	7.781	841.547	312.347	1825.94	12.564
Ecad MO N-C	Non Clone- Clone	h5b1	10.591	895.16	222.31	2211.677	17.132
Ecad MO N-C	Non Clone- Clone	h5b1	10.591	958.953	261.373	2562.796	17.132
Ecad MO N-C	Non Clone- Clone	h5b1	10.591	954.719	266.247	2159.685	17.132
Ecad MO N-C	Non Clone- Clone	h5b1	10.591	903.475	283.464	2108.342	17.132
Ecad MO N-C	Non Clone- Clone	h5b1	10.591	847.24	306.079	2030.394	17.132
Ecad MO N-C	Non Clone- Clone	h5b1	10.591	765.968	334.622	1745.232	17.132
Ecad MO N-C	Non Clone- Clone	h5b1	10.591	682.808	297.722	1351.185	17.132
Ecad MO N-C	Non Clone- Clone
Ecad MO N-C	Non Clone- Clone	h5b2	14.373	1063.683	356.431	2427.406	23.283
Ecad MO N-C	Non Clone- Clone	h5b2	14.373	1204.363	376.662	2530.166	23.283
Ecad MO N-C	Non Clone- Clone	h5b2	14.373	1254.368	508.079	2597.106	23.283
Ecad MO N-C	Non Clone- Clone	h5b2	14.373	1204.584	526.298	2628.087	23.283
Ecad MO N-C	Non Clone- Clone	h5b2	14.373	1119.23	498.711	2447.544	23.283
Ecad MO N-C	Non Clone- Clone	h5b2	14.373	1018.877	454.215	2283.567	23.283
Ecad MO N-C	Non Clone- Clone	h5b2	14.373	894.103	435.131	2040.73	23.283
Ecad MO N-C	Non Clone- Clone
Ecad MO N-C	Non Clone- Clone	h5b3	12.212	1283.658	425.989	2564.907	19.768
Ecad MO N-C	Non Clone- Clone	h5b3	12.212	1341.038	452.878	2495.825	19.768
Ecad MO N-C	Non Clone- Clone	h5b3	12.212	1340.235	515.595	2418.067	19.768
Ecad MO N-C	Non Clone- Clone	h5b3	12.212	1300.205	496.695	2257.191	19.768
Ecad MO N-C	Non Clone- Clone	h5b3	12.212	1233.228	506.718	2166.913	19.768
Ecad MO N-C	Non Clone- Clone	h5b3	12.212	1100.647	510.791	2127.813	19.768
Ecad MO N-C	Non Clone- Clone	h5b3	12.212	955.976	438.034	1985.092	19.768
Ecad MO N-C	Non Clone- Clone	h6b1	7.511	435.751	153.206	1154.738	12.124
Ecad MO N-C	Non Clone- Clone	h6b1	7.511	438.52	179.422	1126.689	12.124
Ecad MO N-C	Non Clone- Clone	h6b1	7.511	426.19	195.61	862.853	12.124
Ecad MO N-C	Non Clone- Clone	h6b1	7.511	434.576	206.735	917.375	12.124
Ecad MO N-C	Non Clone- Clone	h6b1	7.511	439.575	196.714	1004.69	12.124
Ecad MO N-C	Non Clone- Clone	h6b1	7.511	425.721	152.834	870.735	12.124
Ecad MO N-C	Non Clone- Clone
Ecad MO N-C	Non Clone- Clone	h6b2	7.565	638.073	263.098	1326.163	12.212
Ecad MO N-C	Non Clone- Clone	h6b2	7.565	645.751	287.465	1275.836	12.212
Ecad MO N-C	Non Clone- Clone	h6b2	7.565	569.743	234.764	1010.405	12.212
Ecad MO N-C	Non Clone- Clone	h6b2	7.565	478.701	227.32	897.513	12.212
Ecad MO N-C	Non Clone- Clone	h6b2	7.565	396.335	188.988	973.227	12.212
Ecad MO N-C	Non Clone- Clone	h6b2	7.565	316.355	154.603	720.164	12.212
Ecad MO N-C	Non Clone- Clone	h6b2	7.565	264.048	121.056	527.103	12.212
Ecad MO N-C	Non Clone- Clone
Ecad MO N-C	Non Clone- Clone	h6b3	10.807	673.357	259.492	1430.812	17.484
Ecad MO N-C	Non Clone- Clone	h6b3	10.807	774.323	269.493	1699.004	17.484
Ecad MO N-C	Non Clone- Clone	h6b3	10.807	817.98	312.531	1870.999	17.484
Ecad MO N-C	Non Clone- Clone	h6b3	10.807	783.934	291.98	1641.583	17.484
Ecad MO N-C	Non Clone- Clone
Ecad MO N-C	Non Clone- Clone	h6b4	11.239	311.234	97.17	905.675	18.187
Ecad MO N-C	Non Clone- Clone	h6b4	11.239	352.126	98.777	1086.686	18.187
Ecad MO N-C	Non Clone- Clone	h6b4	11.239	370.083	104.275	1243.385	18.187
Ecad MO N-C	Non Clone- Clone	h6b4	11.239	386.416	100.903	1115.227	18.187
Ecad MO N-C	Non Clone- Clone	h6b4	11.239	400.965	127.373	1179.606	18.187
Ecad MO N-C	Non Clone- Clone	h6b4	11.239	401.721	127.44	1120.208	18.187
Ecad MO N-C	Non Clone- Clone	h6b4	11.239	373.991	151.822	935.923	18.187
Ecad MO N-C	Non Clone- Clone	h6b4	11.239	342.803	158.632	659.958	18.187
Ecad MO N-C	Non Clone- Clone
Ecad MO N-C	Non Clone- Clone	h6b5	6.7	534.71	171.478	1234.77	10.807
Ecad MO N-C	Non Clone- Clone	h6b5	6.7	535.89	162.509	1286.712	10.807
Ecad MO N-C	Non Clone- Clone	h6b5	6.7	531.89	158.743	1246.147	10.807
Ecad MO N-C	Non Clone- Clone	h6b5	6.7	488.086	163.942	1100.706	10.807
Ecad MO N-C	Non Clone- Clone	h6b5	6.7	408.507	139.79	880.24	10.807
Ecad MO N-C	Non Clone- Clone	h7b1	5.133	1649.264	749.53	3639.912	8.258
Ecad MO N-C	Non Clone- Clone	h7b1	5.133	1769.548	789.293	3624.56	8.258
Ecad MO N-C	Non Clone- Clone	h7b1	5.133	1781.875	899.485	3126.775	8.258
Ecad MO N-C	Non Clone- Clone	h7b1	5.133	1690.945	745.239	3230.467	8.258
Ecad MO N-C	Non Clone- Clone	h7b1	5.133	1532.232	655.652	2807.841	8.258
Ecad MO N-C	Non Clone- Clone	h7b1	5.133	1345.065	521.944	2631.932	8.258
Ecad MO N-C	Non Clone- Clone
Ecad MO N-C	Non Clone- Clone	h7b2	8.213	1298.628	592.657	2737.252	13.267
Ecad MO N-C	Non Clone- Clone	h7b2	8.213	1358.326	630.6	2523.935	13.267
Ecad MO N-C	Non Clone- Clone	h7b2	8.213	1327.385	690.453	2947.864	13.267
Ecad MO N-C	Non Clone- Clone	h7b2	8.213	1185.919	599.228	3376.353	13.267
Ecad MO N-C	Non Clone- Clone	h7b2	8.213	1023.51	467.04	3129.764	13.267
Ecad MO N-C	Non Clone- Clone
Ecad MO N-C	Non Clone- Clone	h7b3	7.295	1851.631	719.662	3060.4	11.773
Ecad MO N-C	Non Clone- Clone	h7b3	7.295	1807.742	860.085	3060.315	11.773
Ecad MO N-C	Non Clone- Clone	h7b3	7.295	1661.017	788.501	2859.833	11.773
Ecad MO N-C	Non Clone- Clone	h7b3	7.295	1493.223	634.664	2766.408	11.773
Ecad MO N-C	Non Clone- Clone	h7b3	7.295	1334.153	572.126	3154.321	11.773
Ecad MO N-C	Non Clone- Clone	h7b3	7.295	1205.252	447.089	3786.318	11.773
Ecad MO N-C	Non Clone- Clone
Ecad MO N-C	Non Clone- Clone	h7b4	9.78	1994.024	707.654	3924.663	15.814
Ecad MO N-C	Non Clone- Clone	h7b4	9.78	1979.506	706.963	3795.495	15.814
Ecad MO N-C	Non Clone- Clone	h7b4	9.78	1775.242	669.94	3893.871	15.814
Ecad MO N-C	Non Clone- Clone	h7b4	10.591	2005.151	888.611	3946.306	17.132
Ecad MO N-C	Non Clone- Clone	h7b4	10.591	1905.917	747.052	3972.463	17.132
Ecad MO N-C	Non Clone- Clone	h7b4	10.591	1583.444	586.247	3276.157	17.132
Ecad MO N-C	Non Clone- Clone	h7b4	10.591	1211.398	523.861	2450.329	17.132
Ecad MO N-C	Non Clone- Clone	h8b1	9.348	578.206	182.578	1159.243	15.112
Ecad MO N-C	Non Clone- Clone	h8b1	9.348	586.92	213.485	1195.439	15.112
Ecad MO N-C	Non Clone- Clone	h8b1	9.348	566.119	228.983	1085.722	15.112
Ecad MO N-C	Non Clone- Clone	h8b1	9.348	538.338	254.711	1292.408	15.112
Ecad MO N-C	Non Clone- Clone	h8b1	9.348	523.624	229.826	1407.965	15.112
Ecad MO N-C	Non Clone- Clone	h8b1	9.348	523.295	234.824	1495.145	15.112
Ecad MO N-C	Non Clone- Clone	h8b1	9.348	512.762	206.339	1563.748	15.112
Ecad MO N-C	Non Clone- Clone	h8b1	9.348	455.239	204.252	1470.673	15.112
Ecad MO N-C	Non Clone- Clone
Ecad MO N-C	Non Clone- Clone	h8b2	8.808	724.375	280.851	1342.415	14.233
Ecad MO N-C	Non Clone- Clone	h8b2	8.808	731.803	324.351	1378.722	14.233
Ecad MO N-C	Non Clone- Clone	h8b2	8.808	676.558	287.168	1514.031	14.233
Ecad MO N-C	Non Clone- Clone	h8b2	8.808	621.417	224.434	1434.742	14.233
Ecad MO N-C	Non Clone- Clone	h8b2	8.862	786.173	219.814	2268.876	14.321
Ecad MO N-C	Non Clone- Clone	h8b2	8.862	687.856	242.686	2215.379	14.321
Ecad MO N-C	Non Clone- Clone
Ecad MO N-C	Non Clone- Clone
Ecad MO N-C	Non Clone- Clone	h8b3	9.51	716.328	262.961	1655.078	15.375
Ecad MO N-C	Non Clone- Clone	h8b3	9.51	735.17	296.426	1746.125	15.375
Ecad MO N-C	Non Clone- Clone	h8b3	9.51	699.911	272.54	1315.134	15.375
Ecad MO N-C	Non Clone- Clone	h8b3	9.51	629.775	240.777	1173.989	15.375
Ecad MO N-C	Non Clone- Clone	h8b3	9.51	564.354	234.38	1224.493	15.375
Ecad MO N-C	Non Clone- Clone	h8b3	9.51	519.3	243.59	1126.181	15.375
Ecad MO N-C	Non Clone- Clone	h8b3	9.51	469.788	206.991	1126.012	15.375
Ecad MO N-C	Non Clone- Clone
Ecad MO N-C	Non Clone- Clone	h8b4	11.401	564.749	202.826	1376.712	18.45
Ecad MO N-C	Non Clone- Clone	h8b4	11.401	582.914	234.388	1360.25	18.45
Ecad MO N-C	Non Clone- Clone	h8b4	11.725	708.228	197.407	1640.939	18.977
Ecad MO N-C	Non Clone- Clone	h8b4	11.725	739.614	245.473	1701.082	18.977
Ecad MO N-C	Non Clone- Clone	h8b4	11.725	718.915	247.858	1758.502	18.977
Ecad MO N-C	Non Clone- Clone	h8b4	11.725	664.734	218.498	1853.465	18.977
Ecad MO N-C	Non Clone- Clone	h8b4	11.725	585.727	218.153	1458.64	18.977
Ecad MO N-C	Non Clone- Clone
Ecad MO N-C	Non Clone- Clone	h8b5	10.537	674.349	181.814	1508.086	17.043
Ecad MO N-C	Non Clone- Clone	h8b5	10.537	758.846	156.333	1619.828	17.043
Ecad MO N-C	Non Clone- Clone	h8b5	10.537	852.152	214.156	1828.226	17.043
Ecad MO N-C	Non Clone- Clone	h8b5	10.537	917.427	231.225	2173.46	17.043
Ecad MO N-C	Non Clone- Clone	h8b5	10.537	898.928	249.943	2174.921	17.043
Ecad MO N-C	Non Clone- Clone	h8b5	10.537	843.605	282.34	1808.107	17.043
Ecad MO N-C	Non Clone- Clone	h8b5	10.537	714.577	290.002	1548.581	17.043
Ecad MO N-C	Non Clone- Clone
Ecad MO N-C	Non Clone- Clone	h8b6	11.833	470.572	158.659	1396.83	19.153
Ecad MO N-C	Non Clone- Clone	h8b6	11.833	490.042	176.05	1362.41	19.153
Ecad MO N-C	Non Clone- Clone	h8b6	11.833	506.319	185.752	1640.167	19.153
Ecad MO N-C	Non Clone- Clone	h8b6	11.779	586.737	168.104	1497.543	19.065
Ecad MO N-C	Non Clone- Clone	h8b6	11.779	574.791	194.109	1493.17	19.065
Ecad MO N-C	Non Clone- Clone	h8b6	11.779	536.975	187.126	1786.469	19.065
Ecad MO N-C	Non Clone- Clone	h8b6	11.779	503.045	167.637	1782.804	19.065
Ecad MO N-C	Non Clone- Clone
Ecad MO N-C	Non Clone- Clone	h8b9	10.321	481.742	134.819	1176.685	16.693
Ecad MO N-C	Non Clone- Clone	h8b9	10.321	483.724	139.624	1277.944	16.693
Ecad MO N-C	Non Clone- Clone	h8b9	10.321	455.915	185.504	1072.976	16.693
Ecad MO N-C	Non Clone- Clone	h8b9	10.321	458.673	200.21	1116.709	16.693
Ecad MO N-C	Non Clone- Clone	h8b9	10.321	450.772	223.133	1151.348	16.693
Ecad MO N-C	Non Clone- Clone	h8b9	10.321	443.528	192.962	1110.353	16.693
Ecad MO N-C	Non Clone- Clone	h8b9	10.321	432.564	185.782	995.589	16.693
Ecad MO N-N	Non Clone- Non Clone	h1b1	9.024	637.056	156.618	1528.343	14.584
Ecad MO N-N	Non Clone- Non Clone	h1b1	9.024	617.097	187.961	1367.964	14.584
Ecad MO N-N	Non Clone- Non Clone	h1b1	9.024	576.292	179.544	1358.534	14.584
Ecad MO N-N	Non Clone- Non Clone	h1b1	8.754	749.831	217.138	1453.636	14.145
Ecad MO N-N	Non Clone- Non Clone	h1b1	8.754	658.349	222.201	1262.951	14.145
Ecad MO N-N	Non Clone- Non Clone	h1b1	8.754	595.719	226.744	1241.103	14.145
Ecad MO N-N	Non Clone- Non Clone	h1b1	8.754	553.542	228.467	1174.68	14.145
Ecad MO N-N	Non Clone- Non Clone	h1b1	8.754	523.217	166.121	1242.867	14.145
Ecad MO N-N	Non Clone- Non Clone	h1b1	8.754	506.846	178.203	1409.145	14.145
Ecad MO N-N	Non Clone- Non Clone	h1b1	8.754	482.807	175.629	1182.704	14.145
Ecad MO N-N	Non Clone- Non Clone
Ecad MO N-N	Non Clone- Non Clone	h1b2	7.187	622.23	222.74	1313.525	11.597
Ecad MO N-N	Non Clone- Non Clone	h1b2	7.187	660.102	230.001	1453.368	11.597
Ecad MO N-N	Non Clone- Non Clone	h1b2	7.187	671.821	239.368	1541.461	11.597
Ecad MO N-N	Non Clone- Non Clone	h1b2	7.187	651.715	232.725	1339.699	11.597
Ecad MO N-N	Non Clone- Non Clone	h1b2	7.187	617.016	248.714	1208.801	11.597
Ecad MO N-N	Non Clone- Non Clone	h1b2	7.187	576.236	262.934	1111.233	11.597
Ecad MO N-N	Non Clone- Non Clone	h1b2	7.187	539.751	263.584	1145.189	11.597
Ecad MO N-N	Non Clone- Non Clone
Ecad MO N-N	Non Clone- Non Clone	h1b3	17.399	695.656	302.629	1460.029	28.203
Ecad MO N-N	Non Clone- Non Clone	h1b3	17.399	630.862	255.163	1409.011	28.203
Ecad MO N-N	Non Clone- Non Clone	h1b3	17.399	591.76	245.997	1254.472	28.203
Ecad MO N-N	Non Clone- Non Clone	h1b3	17.399	561.67	238.958	1099.409	28.203
Ecad MO N-N	Non Clone- Non Clone	h1b3	17.399	533.899	228.286	1053.203	28.203
Ecad MO N-N	Non Clone- Non Clone	h1b3	17.399	506.731	234.036	997.291	28.203
Ecad MO N-N	Non Clone- Non Clone
Ecad MO N-N	Non Clone- Non Clone	h1b4	7.565	460.385	166.941	1283.617	12.212
Ecad MO N-N	Non Clone- Non Clone	h1b4	7.565	482.184	178.19	1136.445	12.212
Ecad MO N-N	Non Clone- Non Clone	h1b4	7.565	481.652	178.746	941.539	12.212
Ecad MO N-N	Non Clone- Non Clone	h1b4	7.565	489.746	193.926	1097.179	12.212
Ecad MO N-N	Non Clone- Non Clone	h1b4	7.565	497.033	208.134	1131.523	12.212
Ecad MO N-N	Non Clone- Non Clone	h1b4	7.565	505.237	226.051	1106.506	12.212
Ecad MO N-N	Non Clone- Non Clone	h1b4	7.565	515.1	222.124	1098.718	12.212
Ecad MO N-N	Non Clone- Non Clone	h1b4	7.565	529.331	221.479	1062.795	12.212
Ecad MO N-N	Non Clone- Non Clone	h1b4	7.565	517.779	246.212	1144.636	12.212
Ecad MO N-N	Non Clone- Non Clone
Ecad MO N-N	Non Clone- Non Clone	h1b5	8.862	640.353	186.106	1768.688	14.321
Ecad MO N-N	Non Clone- Non Clone	h1b5	8.862	733.096	194.224	2084.924	14.321
Ecad MO N-N	Non Clone- Non Clone	h1b5	8.862	796.317	205.959	2352.839	14.321
Ecad MO N-N	Non Clone- Non Clone	h1b5	8.862	787.636	240.406	2573.435	14.321
Ecad MO N-N	Non Clone- Non Clone	h1b5	8.862	742.086	270.551	2294.001	14.321
Ecad MO N-N	Non Clone- Non Clone	h1b5	8.862	737.384	259.535	1954.196	14.321
Ecad MO N-N	Non Clone- Non Clone
Ecad MO N-N	Non Clone- Non Clone	h1b6	7.457	1084.788	368.397	2220.615	12.028
Ecad MO N-N	Non Clone- Non Clone	h1b6	7.457	1152.35	378.945	2508.093	12.028
Ecad MO N-N	Non Clone- Non Clone	h1b6	7.457	1089.778	355.032	2019.546	12.028
Ecad MO N-N	Non Clone- Non Clone	h1b6	7.457	985.2	344.728	1921.271	12.028
Ecad MO N-N	Non Clone- Non Clone
Ecad MO N-N	Non Clone- Non Clone
Ecad MO N-N	Non Clone- Non Clone
Ecad MO N-N	Non Clone- Non Clone
Ecad MO N-N	Non Clone- Non Clone	h2b1	8.105	687.045	256.944	1502.863	13.091
Ecad MO N-N	Non Clone- Non Clone	h2b1	8.105	775.811	288.092	1816.322	13.091
Ecad MO N-N	Non Clone- Non Clone	h2b1	8.105	798.124	328.191	1762.359	13.091
Ecad MO N-N	Non Clone- Non Clone	h2b1	8.105	767.988	300.39	1594.302	13.091
Ecad MO N-N	Non Clone- Non Clone	h2b1	8.105	706.633	343.013	1354.368	13.091
Ecad MO N-N	Non Clone- Non Clone
Ecad MO N-N	Non Clone- Non Clone	h2b2	7.078	587.975	187.388	1253.801	11.422
Ecad MO N-N	Non Clone- Non Clone	h2b2	7.078	676.552	185.354	1419.833	11.422
Ecad MO N-N	Non Clone- Non Clone	h2b2	7.078	700.286	198.88	1377.803	11.422
Ecad MO N-N	Non Clone- Non Clone	h2b2	7.078	669.568	231.353	1304.036	11.422
Ecad MO N-N	Non Clone- Non Clone	h2b2	7.078	599.42	258.822	1191.391	11.422
Ecad MO N-N	Non Clone- Non Clone	h2b2	7.078	538.888	272.599	1072.935	11.422
Ecad MO N-N	Non Clone- Non Clone
Ecad MO N-N	Non Clone- Non Clone	h2b3	12.698	619.548	214.612	1266.349	20.559
Ecad MO N-N	Non Clone- Non Clone	h2b3	12.698	692.93	294.134	1527.642	20.559
Ecad MO N-N	Non Clone- Non Clone	h2b3	12.698	705.096	273.471	1570.658	20.559
Ecad MO N-N	Non Clone- Non Clone	h2b3	12.698	684.096	288.7	1476.104	20.559
Ecad MO N-N	Non Clone- Non Clone	h2b3	12.698	614.27	273.239	1112.076	20.559
Ecad MO N-N	Non Clone- Non Clone	h2b3	12.698	521.683	252.605	1147.089	20.559
Ecad MO N-N	Non Clone- Non Clone	h3b1	12.59	547.55	173.192	1242.695	20.383
Ecad MO N-N	Non Clone- Non Clone	h3b1	12.59	589.596	184.75	1409.412	20.383
Ecad MO N-N	Non Clone- Non Clone	h3b1	12.59	591.613	217.992	1473.829	20.383
Ecad MO N-N	Non Clone- Non Clone	h3b1	12.59	558.791	200.746	1616.452	20.383
Ecad MO N-N	Non Clone- Non Clone	h3b1	12.59	420.985	198.634	1489.407	20.383
Ecad MO N-N	Non Clone- Non Clone
Ecad MO N-N	Non Clone- Non Clone	h3b2	15.994	585.179	211.379	1327.117	25.918
Ecad MO N-N	Non Clone- Non Clone	h3b2	15.994	542.785	210.961	1160.959	25.918
Ecad MO N-N	Non Clone- Non Clone	h3b2	15.994	525.844	238.036	1212.226	25.918
Ecad MO N-N	Non Clone- Non Clone	h3b2	15.994	505.544	207.23	1449.49	25.918
Ecad MO N-N	Non Clone- Non Clone	h3b2	15.994	377.021	177.876	1597.623	25.918
Ecad MO N-N	Non Clone- Non Clone
Ecad MO N-N	Non Clone- Non Clone	h3b3	8.7	1000.597	452.437	1935.827	14.057
Ecad MO N-N	Non Clone- Non Clone	h3b3	8.7	906.515	414.6	2107.053	14.057
Ecad MO N-N	Non Clone- Non Clone	h3b3	8.7	793.359	326.723	1986.441	14.057
Ecad MO N-N	Non Clone- Non Clone	h3b3	8.7	566.561	284.687	1606.798	14.057
Ecad MO N-N	Non Clone- Non Clone
Ecad MO N-N	Non Clone- Non Clone	h3b4	8.754	1191.503	552.157	2200.247	14.145
Ecad MO N-N	Non Clone- Non Clone	h3b4	8.754	1294.774	517.919	2499.242	14.145
Ecad MO N-N	Non Clone- Non Clone	h3b4	8.754	1190.13	619.082	1943.732	14.145
Ecad MO N-N	Non Clone- Non Clone	h3b4	8.754	950.187	513.29	1698.162	14.145
Ecad MO N-N	Non Clone- Non Clone
Ecad MO N-N	Non Clone- Non Clone	h3b5	10.591	626.072	214.867	1292.539	17.132
Ecad MO N-N	Non Clone- Non Clone	h3b5	10.591	847.027	238.981	2161.583	17.132
Ecad MO N-N	Non Clone- Non Clone	h3b5	10.591	983.003	268.17	2273.334	17.132
Ecad MO N-N	Non Clone- Non Clone	h3b5	5.782	1056.347	347.519	1933.891	9.313
Ecad MO N-N	Non Clone- Non Clone	h3b5	5.782	1117.576	430.202	2068.605	9.313
Ecad MO N-N	Non Clone- Non Clone	h3b5	5.782	1037.914	422.364	1850.079	9.313
Ecad MO N-N	Non Clone- Non Clone
Ecad MO N-N	Non Clone- Non Clone	h3b6	8.645	624.159	225.804	1098.781	13.97
Ecad MO N-N	Non Clone- Non Clone	h3b6	8.645	844.694	294.206	1662.799	13.97
Ecad MO N-N	Non Clone- Non Clone	h3b6	8.645	1013.321	314.183	2074.516	13.97
Ecad MO N-N	Non Clone- Non Clone
Ecad MO N-N	Non Clone- Non Clone	h3b7	7.024	542.504	241.283	1153.801	11.334
Ecad MO N-N	Non Clone- Non Clone	h3b7	7.024	720.756	361.329	1324.015	11.334
Ecad MO N-N	Non Clone- Non Clone	h3b7	7.024	817.175	355.169	1518.015	11.334
Ecad MO N-N	Non Clone- Non Clone	h3b7	7.024	675.71	356.389	1701.745	11.334
Ecad MO N-N	Non Clone- Non Clone
Ecad MO N-N	Non Clone- Non Clone
Ecad MO N-N	Non Clone- Non Clone
Ecad MO N-N	Non Clone- Non Clone
Ecad MO N-N	Non Clone- Non Clone
Ecad MO N-N	Non Clone- Non Clone
Ecad MO N-N	Non Clone- Non Clone
Ecad MO N-N	Non Clone- Non Clone
Ecad MO N-N	Non Clone- Non Clone
Ecad MO N-N	Non Clone- Non Clone
Ecad MO N-N	Non Clone- Non Clone
Ecad MO N-N	Non Clone- Non Clone
Ecad MO N-N	Non Clone- Non Clone
Ecad MO N-N	Non Clone- Non Clone
Ecad MO N-N	Non Clone- Non Clone	h4b1	7.619	543.017	204.81	1353.826	12.3
Ecad MO N-N	Non Clone- Non Clone	h4b1	7.619	594.687	197.5	1425.696	12.3
Ecad MO N-N	Non Clone- Non Clone	h4b1	7.619	661.15	219.959	2089.988	12.3
Ecad MO N-N	Non Clone- Non Clone	h4b1	7.619	663.069	253.36	2179.145	12.3
Ecad MO N-N	Non Clone- Non Clone	h4b1	7.295	934.051	320.251	2188.525	11.773
Ecad MO N-N	Non Clone- Non Clone	h4b1	7.295	994.03	353.91	2290.858	11.773
Ecad MO N-N	Non Clone- Non Clone	h4b1	7.295	1012.737	393.966	2333.054	11.773
Ecad MO N-N	Non Clone- Non Clone	h4b1	7.295	750.61	413.299	1925.022	11.773
Ecad MO N-N	Non Clone- Non Clone
Ecad MO N-N	Non Clone- Non Clone	h4b2	8.645	929.093	223.579	2180.47	13.97
Ecad MO N-N	Non Clone- Non Clone	h4b2	8.645	1054.613	326.76	2358.185	13.97
Ecad MO N-N	Non Clone- Non Clone	h4b2	8.645	1144.446	337.789	2522.009	13.97
Ecad MO N-N	Non Clone- Non Clone	h4b2	8.645	1212.253	350.629	2642.075	13.97
Ecad MO N-N	Non Clone- Non Clone	h4b2	8.645	1210.412	426.461	2779.953	13.97
Ecad MO N-N	Non Clone- Non Clone
Ecad MO N-N	Non Clone- Non Clone	h4b3	13.13	846.994	247.338	2060.83	21.262
Ecad MO N-N	Non Clone- Non Clone	h4b3	13.13	932.233	196.981	2394.322	21.262
Ecad MO N-N	Non Clone- Non Clone	h4b3	13.13	1039.149	208.666	2655.34	21.262
Ecad MO N-N	Non Clone- Non Clone	h4b3	13.13	1143.501	279.972	2777.594	21.262
Ecad MO N-N	Non Clone- Non Clone	h4b3	13.13	1190.823	231.566	3003.375	21.262
Ecad MO N-N	Non Clone- Non Clone
Ecad MO N-N	Non Clone- Non Clone	h4b4	11.293	999.971	320.189	2232.128	18.275
Ecad MO N-N	Non Clone- Non Clone	h4b4	11.293	1087.087	282.759	2522.037	18.275
Ecad MO N-N	Non Clone- Non Clone	h4b4	11.293	1124.479	285.204	2765.596	18.275
Ecad MO N-N	Non Clone- Non Clone	h4b4	11.293	1076.479	329.859	2673.046	18.275
Ecad MO N-N	Non Clone- Non Clone	h4b4	11.293	995.093	333.699	2623.514	18.275
Ecad MO N-N	Non Clone- Non Clone
Ecad MO N-N	Non Clone- Non Clone	h4b5	11.671	938.065	254.781	1947.095	18.89
Ecad MO N-N	Non Clone- Non Clone	h4b5	11.671	997.937	323.999	2002.61	18.89
Ecad MO N-N	Non Clone- Non Clone	h4b5	11.671	947.869	304.189	2193.877	18.89
Ecad MO N-N	Non Clone- Non Clone	h4b5	11.671	835.851	369.199	1808.444	18.89
Ecad MO N-N	Non Clone- Non Clone	h4b5	11.671	800.112	362.93	1687.7	18.89
Ecad MO N-N	Non Clone- Non Clone	h4b5	11.671	790.088	342.673	1681.983	18.89
Ecad MO N-N	Non Clone- Non Clone	h4b5	11.671	800.083	344.292	1673.919	18.89
Ecad MO N-N	Non Clone- Non Clone	h5b1	11.888	855.357	238.411	1788.973	19.241
Ecad MO N-N	Non Clone- Non Clone	h5b1	11.888	978.092	312.444	2103.688	19.241
Ecad MO N-N	Non Clone- Non Clone	h5b1	11.888	1039.956	340.563	2184.073	19.241
Ecad MO N-N	Non Clone- Non Clone	h5b1	11.888	1010.064	389.953	2365.067	19.241
Ecad MO N-N	Non Clone- Non Clone	h5b1	11.888	931.893	361.378	2452.305	19.241
Ecad MO N-N	Non Clone- Non Clone	h5b1	11.888	864.949	332.754	2075.563	19.241
Ecad MO N-N	Non Clone- Non Clone	h5b1	11.888	567.909	292.731	1949.035	19.241
Ecad MO N-N	Non Clone- Non Clone
Ecad MO N-N	Non Clone- Non Clone	h5b2	11.347	647.676	220.221	1437.765	18.362
Ecad MO N-N	Non Clone- Non Clone	h5b2	11.347	749.592	278.765	1643.614	18.362
Ecad MO N-N	Non Clone- Non Clone	h5b2	11.347	825.867	281.948	1685.612	18.362
Ecad MO N-N	Non Clone- Non Clone	h5b2	11.347	815.227	319.435	1541.91	18.362
Ecad MO N-N	Non Clone- Non Clone	h5b2	11.347	793.738	306.086	1532.271	18.362
Ecad MO N-N	Non Clone- Non Clone	h5b2	11.347	754.872	248.895	1436.514	18.362
Ecad MO N-N	Non Clone- Non Clone	h5b2	11.347	699.043	284.276	1495.218	18.362
Ecad MO N-N	Non Clone- Non Clone	h5b2	11.347	588.071	268.102	1384.111	18.362
Ecad MO N-N	Non Clone- Non Clone	h5b2	11.347	327.549	250.099	1499.79	18.362
Ecad MO N-N	Non Clone- Non Clone
Ecad MO N-N	Non Clone- Non Clone	h5b3	13.238	480.244	184.821	1249.109	21.437
Ecad MO N-N	Non Clone- Non Clone	h5b3	13.238	578.96	200.179	1734.594	21.437
Ecad MO N-N	Non Clone- Non Clone	h5b3	13.238	669.962	217.176	2162.95	21.437
Ecad MO N-N	Non Clone- Non Clone	h5b3	13.238	762.832	253.725	3021.64	21.437
Ecad MO N-N	Non Clone- Non Clone	h5b3	13.238	825.512	300.112	3145.135	21.437
Ecad MO N-N	Non Clone- Non Clone	h5b3	13.238	814.339	310.418	2928.262	21.437
Ecad MO N-N	Non Clone- Non Clone	h5b3	13.238	591.545	280.545	2774.901	21.437
Ecad MO N-N	Non Clone- Non Clone
Ecad MO N-N	Non Clone- Non Clone	h5b4	8.808	874.716	241.677	1741.5	14.233
Ecad MO N-N	Non Clone- Non Clone	h5b4	8.808	897.504	301.874	1969.869	14.233
Ecad MO N-N	Non Clone- Non Clone	h5b4	8.808	849.53	289.927	1775.771	14.233
Ecad MO N-N	Non Clone- Non Clone	h5b4	8.808	784.502	284.643	1493.091	14.233
Ecad MO N-N	Non Clone- Non Clone	h5b4	8.808	725.902	309.626	1476.949	14.233
Ecad MO N-N	Non Clone- Non Clone	h5b4	9.726	796.729	338.382	1477.967	15.727
Ecad MO N-N	Non Clone- Non Clone	h5b4	9.726	720.214	373.912	1431.633	15.727
Ecad MO N-N	Non Clone- Non Clone	h6b1	7.781	489.123	158.774	1239.245	12.564
Ecad MO N-N	Non Clone- Non Clone	h6b1	7.781	528.481	183.868	1431.125	12.564
Ecad MO N-N	Non Clone- Non Clone	h6b1	7.781	575.816	172.279	1404.654	12.564
Ecad MO N-N	Non Clone- Non Clone	h6b1	7.781	662.803	181.961	1720.426	12.564
Ecad MO N-N	Non Clone- Non Clone	h6b1	7.781	677.982	222.028	1810.638	12.564
Ecad MO N-N	Non Clone- Non Clone	h6b1	7.781	615.561	214.84	2058.206	12.564
Ecad MO N-N	Non Clone- Non Clone	h6b1	7.781	533.371	236.13	1865.325	12.564
Ecad MO N-N	Non Clone- Non Clone	h6b1	7.781	428.145	174.965	1435.609	12.564
Ecad MO N-N	Non Clone- Non Clone
Ecad MO N-N	Non Clone- Non Clone	h6b2	9.726	337.532	143.888	606.496	15.727
Ecad MO N-N	Non Clone- Non Clone	h6b2	9.726	450.644	194.03	838.517	15.727
Ecad MO N-N	Non Clone- Non Clone	h6b2	9.726	584.747	210.648	1054.841	15.727
Ecad MO N-N	Non Clone- Non Clone	h6b2	9.726	630.526	239.09	1263.817	15.727
Ecad MO N-N	Non Clone- Non Clone	h6b2	9.726	490.779	197.018	1358.805	15.727
Ecad MO N-N	Non Clone- Non Clone
Ecad MO N-N	Non Clone- Non Clone	h6b3	8.321	361.402	156.795	726.439	13.442
Ecad MO N-N	Non Clone- Non Clone	h6b3	8.321	481.177	159.448	1110.195	13.442
Ecad MO N-N	Non Clone- Non Clone	h6b3	8.321	593.984	187.137	1298.277	13.442
Ecad MO N-N	Non Clone- Non Clone	h6b3	8.321	641.3	182.061	1416.039	13.442
Ecad MO N-N	Non Clone- Non Clone	h6b3	8.321	667.482	163.964	1620.945	13.442
Ecad MO N-N	Non Clone- Non Clone	h6b3	8.321	525.653	144.9	1925.06	13.442
Ecad MO N-N	Non Clone- Non Clone
Ecad MO N-N	Non Clone- Non Clone	h6b4	8.645	530.247	181.664	1087.074	13.97
Ecad MO N-N	Non Clone- Non Clone	h6b4	8.645	570.204	179.559	1186.43	13.97
Ecad MO N-N	Non Clone- Non Clone	h6b4	8.645	586.137	192.942	1271.149	13.97
Ecad MO N-N	Non Clone- Non Clone	h6b4	8.645	670.386	215.416	1481.509	13.97
Ecad MO N-N	Non Clone- Non Clone	h6b4	8.645	743.847	272.012	1503.211	13.97
Ecad MO N-N	Non Clone- Non Clone	h6b4	8.645	770.476	278.362	1668.059	13.97
Ecad MO N-N	Non Clone- Non Clone	h6b4	8.645	576.319	299.718	1642.85	13.97
Ecad MO N-N	Non Clone- Non Clone
Ecad MO N-N	Non Clone- Non Clone	h6b5	12.05	393.96	180.642	751.43	19.505
Ecad MO N-N	Non Clone- Non Clone	h6b5	12.05	538.549	250.042	1049.4	19.505
Ecad MO N-N	Non Clone- Non Clone	h6b5	12.05	652.878	212.501	1381.513	19.505
Ecad MO N-N	Non Clone- Non Clone	h6b5	12.05	696.178	247.526	1538.625	19.505
Ecad MO N-N	Non Clone- Non Clone	h6b5	12.05	768.53	235.476	1542.028	19.505
Ecad MO N-N	Non Clone- Non Clone	h6b5	12.05	823.315	271.998	1976.608	19.505
Ecad MO N-N	Non Clone- Non Clone	h6b5	12.05	642.855	301.185	1910.724	19.505
Ecad MO N-N	Non Clone- Non Clone
Ecad MO N-N	Non Clone- Non Clone	h6b6	7.187	353.556	173.731	647.95	11.597
Ecad MO N-N	Non Clone- Non Clone	h6b6	7.187	448.173	190.635	904.724	11.597
Ecad MO N-N	Non Clone- Non Clone	h6b6	7.187	517.704	215.264	1075.585	11.597
Ecad MO N-N	Non Clone- Non Clone	h6b6	7.187	557.483	175.556	1219.868	11.597
Ecad MO N-N	Non Clone- Non Clone	h6b6	7.187	566.672	208.842	1214.641	11.597
Ecad MO N-N	Non Clone- Non Clone	h6b6	7.187	624.838	218.127	1228.629	11.597
Ecad MO N-N	Non Clone- Non Clone	h6b6	7.187	633.297	260.363	1505.254	11.597
Ecad MO N-N	Non Clone- Non Clone	h6b6	11.563	419.839	170.711	1033.468	18.714
Ecad MO N-N	Non Clone- Non Clone	h6b6	11.563	408.369	194.864	991.737	18.714
Ecad MO N-N	Non Clone- Non Clone	h6b6	11.563	438.618	207.034	1165.758	18.714
Ecad MO N-N	Non Clone- Non Clone	h6b6	11.563	482.661	186.836	1218.295	18.714
Ecad MO N-N	Non Clone- Non Clone
Ecad MO N-N	Non Clone- Non Clone
Ecad MO N-N	Non Clone- Non Clone	h7b1	10.699	1393.541	564.26	3234.091	17.308
Ecad MO N-N	Non Clone- Non Clone	h7b1	10.699	1490.495	565.685	3604.086	17.308
Ecad MO N-N	Non Clone- Non Clone	h7b1	10.699	1551.429	597.045	3866.055	17.308
Ecad MO N-N	Non Clone- Non Clone	h7b1	10.699	1555.53	650.299	3728.002	17.308
Ecad MO N-N	Non Clone- Non Clone	h7b1	10.699	1385.591	604.75	2951.093	17.308
Ecad MO N-N	Non Clone- Non Clone
Ecad MO N-N	Non Clone- Non Clone	h7b2	4.269	1726.316	838.729	2992.779	6.852
Ecad MO N-N	Non Clone- Non Clone	h7b2	4.269	1761.885	861.711	2811.499	6.852
Ecad MO N-N	Non Clone- Non Clone	h7b2	4.269	1682.935	1005.998	3138.208	6.852
Ecad MO N-N	Non Clone- Non Clone	h7b2	4.269	1442.205	804.746	2671.889	6.852
Ecad MO N-N	Non Clone- Non Clone	h7b2	4.269	1152.736	651.993	2118.016	6.852
Ecad MO N-N	Non Clone- Non Clone
Ecad MO N-N	Non Clone- Non Clone	h7b3	6.106	1569.619	851.893	3530.593	9.84
Ecad MO N-N	Non Clone- Non Clone	h7b3	6.106	1771.384	916.32	3619.589	9.84
Ecad MO N-N	Non Clone- Non Clone	h7b3	6.106	1920.737	781.542	3532.135	9.84
Ecad MO N-N	Non Clone- Non Clone	h7b3	6.106	1908.227	789.777	3272.804	9.84
Ecad MO N-N	Non Clone- Non Clone	h7b3	6.106	1769.574	758.278	3164.746	9.84
Ecad MO N-N	Non Clone- Non Clone
Ecad MO N-N	Non Clone- Non Clone	h7b4	6.97	1912.336	744.373	4079.72	11.246
Ecad MO N-N	Non Clone- Non Clone	h7b4	6.97	1808.998	637.022	4066.898	11.246
Ecad MO N-N	Non Clone- Non Clone	h7b4	6.97	1629.506	719.812	3923.467	11.246
Ecad MO N-N	Non Clone- Non Clone	h7b4	6.97	1393.852	521.419	3577.765	11.246
Ecad MO N-N	Non Clone- Non Clone	h7b4	6.97	1199.209	436.338	3209.72	11.246
Ecad MO N-N	Non Clone- Non Clone	h7b4	6.97	1051.747	365.246	3071.128	11.246
Ecad MO N-N	Non Clone- Non Clone
Ecad MO N-N	Non Clone- Non Clone	h7b5	4.647	1381.132	788.575	2794.083	7.464
Ecad MO N-N	Non Clone- Non Clone	h7b5	4.647	1255.572	696.206	2237.463	7.464
Ecad MO N-N	Non Clone- Non Clone	h7b5	4.647	1053.341	577.085	2093.956	7.464
Ecad MO N-N	Non Clone- Non Clone	h7b5	4.647	906.412	426.671	1997.481	7.464
Ctrl MO C-C	Clone- Clone	h9b1	10.321	621.255	57.533	1921.878	16.693
Ctrl MO C-C	Clone- Clone	h9b1	10.321	513.016	53.169	2092.6	16.693
Ctrl MO C-C	Clone- Clone	h9b1	10.321	613.418	54.449	2152.331	16.693
Ctrl MO C-C	Clone- Clone	h9b1	10.321	731.845	91.068	1878.617	16.693
Ctrl MO C-C	Clone- Clone	h9b1	10.321	844.411	95.713	2322.1	16.693
Ctrl MO C-C	Clone- Clone	h9b1	10.321	862.359	96.742	3418.381	16.693
Ctrl MO C-C	Clone- Clone	h9b1	10.321	815.039	93.999	2908.51	16.693
Ctrl MO C-C	Clone- Clone	h9b1	10.321	687.535	70.67	2853.15	16.693
Ctrl MO C-C	Clone- Clone	h9b1	10.321	507.914	28.421	2818.649	16.693
Ctrl MO C-C	Clone- Clone
Ctrl MO C-C	Clone- Clone	h9b2	8.591	361.015	63.592	1741.256	13.882
Ctrl MO C-C	Clone- Clone	h9b2	8.591	446.321	106.796	1676.272	13.882
Ctrl MO C-C	Clone- Clone	h9b2	8.591	570.706	117.78	1942.894	13.882
Ctrl MO C-C	Clone- Clone	h9b2	8.591	762.557	166.94	2322.115	13.882
Ctrl MO C-C	Clone- Clone	h9b2	8.591	904.108	198.39	3518.919	13.882
Ctrl MO C-C	Clone- Clone	h9b2	8.591	575.579	100.9	2334.186	13.882
Ctrl MO C-C	Clone- Clone
Ctrl MO C-C	Clone- Clone	h9b3	8.429	347.147	1.946	1391.204	13.602
Ctrl MO C-C	Clone- Clone	h9b3	8.429	431.586	0.131	1805.318	13.602
Ctrl MO C-C	Clone- Clone	h9b3	8.429	500.911	14.573	2166.582	13.602
Ctrl MO C-C	Clone- Clone	h9b3	8.429	601.966	22.767	2328.052	13.602
Ctrl MO C-C	Clone- Clone	h9b3	8.429	674.235	68.952	3241.283	13.602
Ctrl MO C-C	Clone- Clone	h9b3	8.429	614.925	122.467	2355.434	13.602
Ctrl MO C-C	Clone- Clone	h9b3	8.429	615.007	90.089	2994.143	13.602
Ctrl MO C-C	Clone- Clone
Ctrl MO C-C	Clone- Clone	h9b4	7.943	285.088	5.478	895.29	12.827
Ctrl MO C-C	Clone- Clone	h9b4	7.943	156.833	1.093	654.743	12.827
Ctrl MO C-C	Clone- Clone	h9b4	7.943	285.088	5.478	895.29	12.827
Ctrl MO C-C	Clone- Clone	h9b4	7.943	456.041	19.117	1474.79	12.827
Ctrl MO C-C	Clone- Clone	h9b4	7.943	545.895	24.352	2101.811	12.827
Ctrl MO C-C	Clone- Clone	h9b4	8.267	734.825	49.604	2056.137	13.354
Ctrl MO C-C	Clone- Clone	h9b4	8.267	819.314	80.518	1895.13	13.354
Ctrl MO C-C	Clone- Clone	h9b4	8.267	863.189	127.784	2804.908	13.354
Ctrl MO C-C	Clone- Clone	h9b4	8.267	797.673	143.415	2633.233	13.354
Ctrl MO C-C	Clone- Clone	h10b1	11.239	623.766	73.79	1938.254	18.187
Ctrl MO C-C	Clone- Clone	h10b1	11.239	825.6	87.1	2770.423	18.187
Ctrl MO C-C	Clone- Clone	h10b1	11.239	897.898	111.3	2957.749	18.187
Ctrl MO C-C	Clone- Clone	h10b1	11.239	962.364	112.581	3211.273	18.187
Ctrl MO C-C	Clone- Clone	h10b1	11.239	898.635	98.387	2737.427	18.187
Ctrl MO C-C	Clone- Clone	h10b1	11.239	564.921	74.193	2426.308	18.187
Ctrl MO C-C	Clone- Clone
Ctrl MO C-C	Clone- Clone	h10b2	7.997	236.851	8.843	795.672	12.915
Ctrl MO C-C	Clone- Clone	h10b2	7.997	419.756	50.843	1940.152	12.915
Ctrl MO C-C	Clone- Clone	h10b2	7.997	509.943	99.089	1909.117	12.915
Ctrl MO C-C	Clone- Clone	h10b2	7.997	536.42	104.659	1703.975	12.915
Ctrl MO C-C	Clone- Clone	h10b2	7.997	592.016	84.594	1641.687	12.915
Ctrl MO C-C	Clone- Clone	h10b2	7.997	581.574	73.43	1868.475	12.915
Ctrl MO C-C	Clone- Clone	h10b2	7.997	401.873	82.258	1327.451	12.915
Ctrl MO C-C	Clone- Clone
Ctrl MO C-C	Clone- Clone	h10b3	5.295	177.582	21.045	553.107	8.522
Ctrl MO C-C	Clone- Clone	h10b3	5.295	293.545	46.861	835.07	8.522
Ctrl MO C-C	Clone- Clone	h10b3	5.295	488.125	62.662	1305.805	8.522
Ctrl MO C-C	Clone- Clone	h10b3	5.295	618.46	113.131	1473.953	8.522
Ctrl MO C-C	Clone- Clone	h10b3	5.295	674.383	147.625	1696.004	8.522
Ctrl MO C-C	Clone- Clone	h10b3	5.295	761.967	198.813	2099.94	8.522
Ctrl MO C-C	Clone- Clone	h10b3	5.295	781.006	206.667	1864.701	8.522
Ctrl MO C-C	Clone- Clone	h10b3	5.295	611.367	153.672	1456.049	8.522
Ctrl MO C-C	Clone- Clone
Ctrl MO C-C	Clone- Clone	h10b4	10.861	454.825	85.397	1368.953	17.572
Ctrl MO C-C	Clone- Clone	h10b4	10.861	547.067	65.23	1515.11	17.572
Ctrl MO C-C	Clone- Clone	h10b4	10.861	565.941	51.923	1563.498	17.572
Ctrl MO C-C	Clone- Clone	h10b4	10.861	603.659	80.065	2150.46	17.572
Ctrl MO C-C	Clone- Clone	h10b4	10.699	900.621	137.093	3495.476	17.308
Ctrl MO C-C	Clone- Clone	h10b4	10.699	871.144	158.415	2809.073	17.308
Ctrl MO C-C	Clone- Clone	h10b4	10.699	673.011	122.703	2656.009	17.308
Ctrl MO C-C	Clone- Clone
Ctrl MO C-C	Clone- Clone	h10b5	8.97	327.149	29.275	1484.803	14.496
Ctrl MO C-C	Clone- Clone	h10b5	8.97	542.951	35.828	2051.724	14.496
Ctrl MO C-C	Clone- Clone	h10b5	8.97	689.441	45.047	2602.859	14.496
Ctrl MO C-C	Clone- Clone	h10b5	8.97	733.261	33.53	2537.496	14.496
Ctrl MO C-C	Clone- Clone	h10b5	8.97	782.866	72.757	2682.856	14.496
Ctrl MO C-C	Clone- Clone	h10b5	8.97	813.962	98.763	2515.809	14.496
Ctrl MO C-C	Clone- Clone	h10b5	8.97	804.084	106.286	2944.138	14.496
Ctrl MO C-C	Clone- Clone	h10b5	8.97	746.32	102.972	2445.816	14.496
Ctrl MO C-C	Clone- Clone	h11b1	8.754	224.776	16.514	817.189	14.145
Ctrl MO C-C	Clone- Clone	h11b1	8.754	332.981	28.505	1214.114	14.145
Ctrl MO C-C	Clone- Clone	h11b1	8.754	501.207	54.06	1706.29	14.145
Ctrl MO C-C	Clone- Clone	h11b1	8.754	744.6	100.111	2254.068	14.145
Ctrl MO C-C	Clone- Clone	h11b1	8.754	1100.248	97.69	3413.115	14.145
Ctrl MO C-C	Clone- Clone	h11b1	8.754	1155.838	161.702	3398.279	14.145
Ctrl MO C-C	Clone- Clone	h11b1	8.754	1085.804	171.04	2836.651	14.145
Ctrl MO C-C	Clone- Clone	h11b1	8.754	872.447	152.706	3432.799	14.145
Ctrl MO C-C	Clone- Clone	h11b1	8.754	560.712	52.665	2535.154	14.145
Ctrl MO C-C	Clone- Clone
Ctrl MO C-C	Clone- Clone	h11b2	3.944	257.04	31.321	1265.633	6.326
Ctrl MO C-C	Clone- Clone	h11b2	3.944	439.58	67.94	1670.512	6.326
Ctrl MO C-C	Clone- Clone	h11b2	3.944	670.306	95.594	2172.265	6.326
Ctrl MO C-C	Clone- Clone	h11b2	3.944	904.316	142.927	2647.894	6.326
Ctrl MO C-C	Clone- Clone	h11b2	3.944	1168.465	209.33	2801.794	6.326
Ctrl MO C-C	Clone- Clone	h11b2	3.944	1183.307	401.29	2264.261	6.326
Ctrl MO C-C	Clone- Clone	h11b2	3.944	995.408	393.112	2074.039	6.326
Ctrl MO C-C	Clone- Clone	h11b2	3.944	672.842	224.213	1561.51	6.326
Ctrl MO C-C	Clone- Clone
Ctrl MO C-C	Clone- Clone	h11b3	12.374	743.792	57.384	2007.274	20.032
Ctrl MO C-C	Clone- Clone	h11b3	12.374	984.461	55.879	3098.769	20.032
Ctrl MO C-C	Clone- Clone	h11b3	12.374	1150.175	75.724	3912.558	20.032
Ctrl MO C-C	Clone- Clone	h11b3	12.374	1101.461	53.986	3713.929	20.032
Ctrl MO C-C	Clone- Clone	h11b3	12.374	1044.702	100.809	3629.794	20.032
Ctrl MO C-C	Clone- Clone	h11b3	12.374	890.937	153.56	2773.781	20.032
Ctrl MO C-C	Clone- Clone	h11b3	12.374	577.578	54.205	2016.403	20.032
Ctrl MO C-C	Clone- Clone
Ctrl MO C-C	Clone- Clone	h11b4	14.913	401.03	18.925	1508.659	24.161
Ctrl MO C-C	Clone- Clone	h11b4	14.913	465.757	14.456	1641.311	24.161
Ctrl MO C-C	Clone- Clone	h11b4	14.913	524.646	1.582	2062.911	24.161
Ctrl MO C-C	Clone- Clone	h11b4	14.967	980.765	139.634	2527.303	24.249
Ctrl MO C-C	Clone- Clone	h11b4	14.967	1058.337	141.492	2608.771	24.249
Ctrl MO C-C	Clone- Clone	h11b4	14.967	1053.126	119.228	3282.98	24.249
Ctrl MO C-C	Clone- Clone	h11b4	14.967	985.764	170.764	3202.303	24.249
Ctrl MO C-C	Clone- Clone	h11b4	14.967	770.537	86.966	3042.046	24.249
Ctrl MO C-C	Clone- Clone
Ctrl MO C-C	Clone- Clone	h11b5	7.619	572.932	94.733	1679.025	12.3
Ctrl MO C-C	Clone- Clone	h11b5	7.619	780.113	132.462	2223.867	12.3
Ctrl MO C-C	Clone- Clone	h11b5	7.619	947.888	80.706	2730.801	12.3
Ctrl MO C-C	Clone- Clone	h11b5	7.619	942.256	115.755	2472.255	12.3
Ctrl MO C-C	Clone- Clone	h11b5	7.619	948.818	151.424	2441.651	12.3
Ctrl MO C-C	Clone- Clone	h11b5	7.619	905.373	91.575	2660.37	12.3
Ctrl MO C-C	Clone- Clone
Ctrl MO C-C	Clone- Clone	h11b6	7.187	356.714	27.517	1174.768	11.597
Ctrl MO C-C	Clone- Clone	h11b6	7.187	497.934	27.568	1436.363	11.597
Ctrl MO C-C	Clone- Clone	h11b6	7.187	614.573	70.864	1713.528	11.597
Ctrl MO C-C	Clone- Clone	h11b6	7.187	631.275	72.659	1572.388	11.597
Ctrl MO C-C	Clone- Clone	h11b6	7.187	665.008	96.548	2173.848	11.597
Ctrl MO C-C	Clone- Clone	h11b6	7.187	691.308	72.326	1922.643	11.597
Ctrl MO C-C	Clone- Clone	h11b6	7.187	540.709	77.241	1582.276	11.597
Ctrl MO C-C	Clone- Clone
Ctrl MO C-C	Clone- Clone	h11b7	10.645	454.697	106.393	1159.261	17.22
Ctrl MO C-C	Clone- Clone	h11b7	10.645	601.254	84.738	1662.287	17.22
Ctrl MO C-C	Clone- Clone	h11b7	10.645	658.479	92.341	1991.012	17.22
Ctrl MO C-C	Clone- Clone	h11b7	10.645	617.531	103.775	1835.236	17.22
Ctrl MO C-C	Clone- Clone	h11b7	10.645	655.193	105.237	1940.95	17.22
Ctrl MO C-C	Clone- Clone	h11b7	10.645	749.961	119.288	2268.051	17.22
Ctrl MO C-C	Clone- Clone	h11b7	10.645	840.801	141.716	3746.669	17.22
Ctrl MO C-C	Clone- Clone	h11b7	10.645	776.031	96.915	3614.403	17.22
Ctrl MO C-C	Clone- Clone
Ctrl MO C-C	Clone- Clone	h11b8	9.564	503.59	98.155	1365.454	15.463
Ctrl MO C-C	Clone- Clone	h11b8	9.564	635.563	89.958	1803.277	15.463
Ctrl MO C-C	Clone- Clone	h11b8	9.564	767.221	45.432	2322.42	15.463
Ctrl MO C-C	Clone- Clone	h11b8	9.564	880.106	92.198	2821.95	15.463
Ctrl MO C-C	Clone- Clone	h11b8	9.564	780.89	56.947	3356.57	15.463
Ctrl MO C-C	Clone- Clone	h11b8	9.564	724.554	104.078	3092.589	15.463
Ctrl MO C-C	Clone- Clone	h11b8	6.7	948.45	129.854	3296.872	10.806
Ctrl MO C-C	Clone- Clone	h11b8	6.7	829.424	171.39	2479.387	10.806
Ctrl MO C-C	Clone- Clone	h11b8	6.7	665.643	68.736	2385.479	10.806
Ctrl MO C-C	Clone- Clone
Ctrl MO C-C	Clone- Clone	h11b9	8.591	340.714	34.768	1029.545	13.882
Ctrl MO C-C	Clone- Clone	h11b9	8.591	459.766	66.688	1267.181	13.882
Ctrl MO C-C	Clone- Clone	h11b9	8.591	642.579	104.434	1712.514	13.882
Ctrl MO C-C	Clone- Clone	h11b9	8.591	980.951	113.054	3101.378	13.882
Ctrl MO C-C	Clone- Clone	h11b9	8.591	1058.165	152.865	3419.682	13.882
Ctrl MO C-C	Clone- Clone	h11b9	8.591	948.691	146.299	2945.406	13.882
Ctrl MO C-C	Clone- Clone	h11b9	8.591	778.102	84.507	2252.099	13.882
Ctrl MO C-C	Clone- Clone
Ctrl MO C-C	Clone- Clone	h11b10	9.942	363.376	32.536	1071.526	16.078
Ctrl MO C-C	Clone- Clone	h11b10	9.942	460.706	61.383	1633.92	16.078
Ctrl MO C-C	Clone- Clone	h11b10	9.942	575.03	74.197	2170.934	16.078
Ctrl MO C-C	Clone- Clone	h11b10	9.942	778.725	107.267	2557.147	16.078
Ctrl MO C-C	Clone- Clone	h11b10	9.942	898.396	177.979	2965.683	16.078
Ctrl MO C-C	Clone- Clone	h11b10	9.942	952.039	245.448	3214.893	16.078
Ctrl MO C-C	Clone- Clone	h11b10	9.942	921.87	173.54	3168.733	16.078
Ctrl MO C-C	Clone- Clone	h11b10	9.942	753.567	92.019	2918.533	16.078
Ctrl MO C-C	Clone- Clone
Ctrl MO C-C	Clone- Clone	h11b11	6.646	230.096	12.209	730.921	10.719
Ctrl MO C-C	Clone- Clone	h11b11	6.646	320.546	29.341	908.977	10.719
Ctrl MO C-C	Clone- Clone	h11b11	6.646	413.536	78.688	1274.58	10.719
Ctrl MO C-C	Clone- Clone	h11b11	6.646	614.617	106.372	1641.702	10.719
Ctrl MO C-C	Clone- Clone	h11b11	6.646	748.941	188.976	2328.389	10.719
Ctrl MO C-C	Clone- Clone	h11b11	6.646	882.738	81.729	2681.424	10.719
Ctrl MO C-C	Clone- Clone	h11b11	6.646	979.802	161.625	3702.893	10.719
Ctrl MO C-C	Clone- Clone	h11b11	6.646	911.221	106.532	2451.307	10.719
Ctrl MO C-C	Clone- Clone
Ctrl MO C-C	Clone- Clone	h11b12	10.915	217.203	15.934	706.237	17.659
Ctrl MO C-C	Clone- Clone	h11b12	10.915	265.136	12.955	1208.379	17.659
Ctrl MO C-C	Clone- Clone	h11b12	10.915	295.357	25.233	1279.721	17.659
Ctrl MO C-C	Clone- Clone	h11b12	10.915	300.859	38.404	1452.246	17.659
Ctrl MO C-C	Clone- Clone	h11b12	11.725	705.583	39.451	2328.074	18.969
Ctrl MO C-C	Clone- Clone	h11b12	11.725	764.273	70.897	2590.301	18.969
Ctrl MO C-C	Clone- Clone	h11b12	11.725	842.641	124.908	2398.179	18.969
Ctrl MO C-C	Clone- Clone	h11b12	11.725	773.658	128.522	2757.931	18.969
Ctrl MO C-C	Clone- Clone
Ctrl MO C-C	Clone- Clone	h11b13	8.808	349.09	24.422	990.136	14.231
Ctrl MO C-C	Clone- Clone	h11b13	8.808	468.56	38.248	1466.481	14.231
Ctrl MO C-C	Clone- Clone	h11b13	8.808	580.685	88.886	1395.04	14.231
Ctrl MO C-C	Clone- Clone	h11b13	8.808	567.249	87.877	1335.237	14.231
Ctrl MO C-C	Clone- Clone	h11b13	8.808	570.387	139.115	1821.631	14.231
Ctrl MO C-C	Clone- Clone	h11b13	8.808	565.182	83.602	2804.045	14.231
Ctrl MO C-C	Clone- Clone	h11b13	8.808	488.599	88.855	3275.056	14.231
Ctrl MO C-C	Clone- Clone	h12b1	12.536	310.995	29.298	1498.984	20.295
Ctrl MO C-C	Clone- Clone	h12b1	12.536	379.133	36.644	2437.864	20.295
Ctrl MO C-C	Clone- Clone	h12b1	12.536	576.342	3.177	3792.681	20.295
Ctrl MO C-C	Clone- Clone	h12b1	12.536	648.799	42.675	3707.091	20.295
Ctrl MO C-C	Clone- Clone	h12b1	12.536	596.835	38.281	3047.638	20.295
Ctrl MO C-C	Clone- Clone	h12b1	12.536	418.106	28.777	2513.586	20.295
Ctrl MO C-C	Clone- Clone
Ctrl MO C-C	Clone- Clone	h12b2	8.808	270.896	45.281	874.888	14.233
Ctrl MO C-C	Clone- Clone	h12b2	8.808	319.091	44.119	1051.051	14.233
Ctrl MO C-C	Clone- Clone	h12b2	8.808	373.738	39.546	1158.335	14.233
Ctrl MO C-C	Clone- Clone	h12b2	8.808	430.614	53.349	2513.635	14.233
Ctrl MO C-C	Clone- Clone	h12b2	8.808	451.473	51.517	2853.564	14.233
Ctrl MO C-C	Clone- Clone	h12b2	8.808	547.341	82.52	3578.748	14.233
Ctrl MO C-C	Clone- Clone
Ctrl MO C-C	Clone- Clone	h12b3	9.996	108.854	2.195	410.584	16.166
Ctrl MO C-C	Clone- Clone	h12b3	9.996	191.86	3.663	771.798	16.166
Ctrl MO C-C	Clone- Clone	h12b3	9.996	245.641	10.496	1203.681	16.166
Ctrl MO C-C	Clone- Clone	h12b3	9.996	301.542	16.019	1394.048	16.166
Ctrl MO C-C	Clone- Clone	h12b3	9.996	348.892	23.275	1759.671	16.166
Ctrl MO C-C	Clone- Clone	h12b3	9.996	303.132	29.987	1484.51	16.166
Ctrl MO C-C	Clone- Clone
Ctrl MO C-C	Clone- Clone	h12b4	8.051	157.096	2.406	850.902	13.003
Ctrl MO C-C	Clone- Clone	h12b4	8.051	255.848	2.223	2097.731	13.003
Ctrl MO C-C	Clone- Clone	h12b4	8.051	306.252	15.884	2611.115	13.003
Ctrl MO C-C	Clone- Clone	h12b4	7.673	936.006	176.986	3416.887	12.388
Ctrl MO C-C	Clone- Clone	h12b4	7.673	1027.273	197.951	3636.583	12.388
Ctrl MO C-C	Clone- Clone	h12b4	7.673	1081.272	110.655	3231.355	12.388
Ctrl MO C-C	Clone- Clone	h12b4	7.673	1304.841	104.882	4013.661	12.388
Ctrl MO C-C	Clone- Clone	h12b4	7.673	1373.82	209.747	4095	12.388
Ctrl MO C-C	Clone- Clone	h12b4	7.673	1100.569	155.293	4095	12.388
Ctrl MO C-C	Clone- Clone
Ctrl MO C-C	Clone- Clone	h12b5	9.942	526.291	81.664	1622.208	16.078
Ctrl MO C-C	Clone- Clone	h12b5	9.942	663.666	59.529	2185.852	16.078
Ctrl MO C-C	Clone- Clone	h12b5	9.942	744.692	89.098	3123.292	16.078
Ctrl MO C-C	Clone- Clone	h12b5	9.942	834.253	81.049	3264.797	16.078
Ctrl MO C-C	Clone- Clone	h12b5	10.104	1119.843	120.443	3931.954	16.342
Ctrl MO C-C	Clone- Clone	h12b5	10.104	1246.083	136.032	4093.53	16.342
Ctrl MO C-C	Clone- Clone	h12b5	10.104	1196.836	135.958	3935.478	16.342
Ctrl MO C-C	Clone- Clone	h12b5	10.104	726.755	131.917	2723.59	16.342
Ctrl MO C-C	Clone- Clone
Ctrl MO C-C	Clone- Clone	h12b6	12.482	696.931	83.716	1912.522	20.207
Ctrl MO C-C	Clone- Clone	h12b6	12.482	829.104	75.22	2804.708	20.207
Ctrl MO C-C	Clone- Clone	h12b6	12.482	856.738	72.336	3590.833	20.207
Ctrl MO C-C	Clone- Clone	h12b6	12.482	843.407	86.506	3732.912	20.207
Ctrl MO C-C	Clone- Clone	h12b6	12.698	1061.435	136.701	2804.604	20.559
Ctrl MO C-C	Clone- Clone	h12b6	12.698	1028.29	176.017	2920.942	20.559
Ctrl MO C-C	Clone- Clone	h12b6	12.698	1045.119	105.308	4095	20.559
Ctrl MO C-C	Clone- Clone	h12b6	12.698	903.646	52.594	4076.197	20.559
Ctrl MO C-C	Clone- Clone	h13b1	10.807	744.894	136.353	2530.161	17.484
Ctrl MO C-C	Clone- Clone	h13b1	10.807	886.247	131.603	2662.196	17.484
Ctrl MO C-C	Clone- Clone	h13b1	10.807	1041.327	135.593	3049.638	17.484
Ctrl MO C-C	Clone- Clone	h13b1	10.807	1267.521	147.583	4022.319	17.484
Ctrl MO C-C	Clone- Clone	h13b1	10.807	1306.292	151.13	4095	17.484
Ctrl MO C-C	Clone- Clone	h13b1	10.807	1216.212	163.656	4095	17.484
Ctrl MO C-C	Clone- Clone	h13b1	10.807	1131.005	162.204	4095	17.484
Ctrl MO C-C	Clone- Clone	h13b1	10.807	1021.397	252.835	4095	17.484
Ctrl MO C-C	Clone- Clone
Ctrl MO C-C	Clone- Clone	h13b2	14.751	421.371	34.94	1797.012	23.898
Ctrl MO C-C	Clone- Clone	h13b2	14.751	444.047	42.781	1925.254	23.898
Ctrl MO C-C	Clone- Clone	h13b2	14.751	430.563	44.226	2912.064	23.898
Ctrl MO C-C	Clone- Clone	h13b2	14.751	345.558	32.512	1936.104	23.898
Ctrl MO C-C	Clone- Clone	h13b2	14.751	293.014	49.029	1549.189	23.898
Ctrl MO C-C	Clone- Clone	h13b2	14.751	818.523	65.592	3370.211	23.897
Ctrl MO C-C	Clone- Clone	h13b2	14.751	705.077	83.195	2531.209	23.897
Ctrl MO C-C	Clone- Clone	h13b2	14.751	519.911	53.016	2404.421	23.897
Ctrl MO C-C	Clone- Clone	h13b2	14.751	326.232	33.217	1320.984	23.897
Ctrl MO C-C	Clone- Clone
Ctrl MO C-C	Clone- Clone	h13b3	10.104	979.2	111.285	2591.813	16.342
Ctrl MO C-C	Clone- Clone	h13b3	10.104	1142.446	164.425	3205.743	16.342
Ctrl MO C-C	Clone- Clone	h13b3	10.104	1211.011	138.97	3158.812	16.342
Ctrl MO C-C	Clone- Clone	h13b3	10.104	1165.151	180.89	3444.527	16.342
Ctrl MO C-C	Clone- Clone	h13b3	10.104	1067.801	242.002	2652.657	16.342
Ctrl MO C-C	Clone- Clone	h13b3	10.104	1017.046	224.141	2683.995	16.342
Ctrl MO C-C	Clone- Clone	h13b3	10.104	909.138	227.906	2821.845	16.342
Ctrl MO C-C	Clone- Clone	h13b3	10.104	711.889	111.862	2605.284	16.342
Ctrl MO C-C	Clone- Clone
Ctrl MO C-C	Clone- Clone	h13b4	9.024	447.484	35.887	1194.663	14.585
Ctrl MO C-C	Clone- Clone	h13b4	9.024	676.646	59.97	2058.93	14.585
Ctrl MO C-C	Clone- Clone	h13b4	9.024	838.025	46.972	2517.423	14.585
Ctrl MO C-C	Clone- Clone	h13b4	9.024	1095.005	72.182	3370.148	14.585
Ctrl MO C-C	Clone- Clone	h13b4	9.024	1325.928	75.343	4006.395	14.585
Ctrl MO C-C	Clone- Clone	h13b4	9.024	1622.293	134.761	4046.752	14.585
Ctrl MO C-C	Clone- Clone	h13b4	9.024	1682.869	133.934	4094.529	14.585
Ctrl MO C-C	Clone- Clone	h13b4	9.024	1617.134	171.922	4081.703	14.585
Ctrl MO C-C	Clone- Clone	h13b4	9.024	1384.022	111.739	4044.692	14.585
Ctrl MO C-C	Clone- Clone
Ctrl MO C-C	Clone- Clone	h13b5	9.186	714.674	56.146	2256.831	14.848
Ctrl MO C-C	Clone- Clone	h13b5	9.186	836.05	52.708	2843.496	14.848
Ctrl MO C-C	Clone- Clone	h13b5	9.186	941.517	61.662	3036.021	14.848
Ctrl MO C-C	Clone- Clone	h13b5	9.294	1391.264	172.144	3790.169	15.024
Ctrl MO C-C	Clone- Clone	h13b5	9.294	1620.37	129.447	4067.907	15.024
Ctrl MO C-C	Clone- Clone	h13b5	9.294	1406.877	158.119	3843.235	15.024
Ctrl MO C-C	Clone- Clone	h13b5	9.294	1031.778	198.332	3373.695	15.024
Ctrl MO C-C	Clone- Clone	h13b5	9.294	691.178	94.239	2887.151	15.024
Ctrl MO C-C	Clone- Clone
Ctrl MO C-C	Clone- Clone	h13b6	7.295	526.347	85.204	1441.858	11.773
Ctrl MO C-C	Clone- Clone	h13b6	7.295	735.029	93.012	1984.594	11.773
Ctrl MO C-C	Clone- Clone	h13b6	7.295	883.49	96.191	2810.92	11.773
Ctrl MO C-C	Clone- Clone	h13b6	7.295	1015.464	131.51	3426.143	11.773
Ctrl MO C-C	Clone- Clone	h13b6	7.295	1057.991	147.02	3177.458	11.773
Ctrl MO C-C	Clone- Clone	h13b6	7.295	931.905	80.633	4073.942	11.773
Ctrl MO C-C	Clone- Clone	h13b6	7.295	761.004	142.18	3159.299	11.773
Ctrl MO C-C	Clone- Clone	h13b6	7.295	592.75	125.372	1651.016	11.773
Ctrl MO C-C	Clone- Clone
Ctrl MO C-C	Clone- Clone	h13b7	5.89	605.801	59.59	2174.067	9.489
Ctrl MO C-C	Clone- Clone	h13b7	5.89	696.488	75.457	2022.229	9.489
Ctrl MO C-C	Clone- Clone	h13b7	5.89	790.586	67.439	2597.25	9.489
Ctrl MO C-C	Clone- Clone	h13b7	5.89	927.454	143.023	2888.082	9.489
Ctrl MO C-C	Clone- Clone	h13b7	5.89	1014.676	126.544	3520.505	9.489
Ctrl MO C-C	Clone- Clone	h13b7	5.89	958.267	144.097	3986.087	9.489
Ctrl MO C-C	Clone- Clone	h13b7	5.89	895.508	177.166	3260.234	9.489
Ctrl MO C-C	Clone- Clone
Ctrl MO C-C	Clone- Clone	h13b8	3.999	443.646	41.181	1408.459	6.408
Ctrl MO C-C	Clone- Clone	h13b8	3.999	564.091	72.878	1378.621	6.408
Ctrl MO C-C	Clone- Clone	h13b8	3.999	638.659	62.122	2182.958	6.408
Ctrl MO C-C	Clone- Clone	h13b8	3.999	707.497	111.839	2206.407	6.408
Ctrl MO C-C	Clone- Clone	h13b8	3.999	805.728	152.652	2402.962	6.408
Ctrl MO C-C	Clone- Clone	h13b8	3.999	829.779	221.933	2868.989	6.408
Ctrl MO C-C	Clone- Clone	h13b8	3.999	805.58	274.968	2182.398	6.408
Ctrl MO C-C	Clone- Clone
Ctrl MO C-C	Clone- Clone	h13b9	9.402	620.006	121.728	1894.429	15.2
Ctrl MO C-C	Clone- Clone	h13b9	9.402	804.931	118.918	2971.902	15.2
Ctrl MO C-C	Clone- Clone	h13b9	9.402	1063.302	144.965	4095	15.2
Ctrl MO C-C	Clone- Clone	h13b9	9.402	1218.46	113.825	4095	15.2
Ctrl MO C-C	Clone- Clone	h13b9	9.402	1043.772	14.956	4073.718	15.2
Ctrl MO C-C	Clone- Clone	h13b9	9.402	991.175	22.678	4095	15.2
Ctrl MO C-C	Clone- Clone
Ctrl MO C-C	Clone- Clone	h13b10	10.212	542.672	106.846	1110.228	16.517
Ctrl MO C-C	Clone- Clone	h13b10	10.212	780.33	144.427	1729.903	16.517
Ctrl MO C-C	Clone- Clone	h13b10	10.212	885.381	180.651	2299.631	16.517
Ctrl MO C-C	Clone- Clone	h13b10	10.212	931.727	122.287	2781.33	16.517
Ctrl MO C-C	Clone- Clone	h13b10	10.212	910.448	95.376	3167.464	16.517
Ctrl MO C-C	Clone- Clone	h13b10	10.212	732.063	61.48	3442.36	16.517
Ctrl MO C-C	Clone- Clone	h13b10	10.212	617.603	36.882	2486.934	16.517
Ctrl MO C-C	Clone- Clone
Ctrl MO C-C	Clone- Clone	h13b11	13.022	789.53	131.613	2105.327	21.086
Ctrl MO C-C	Clone- Clone	h13b11	13.022	962.954	146.634	2254.522	21.086
Ctrl MO C-C	Clone- Clone	h13b11	13.022	1153.847	160.867	2776.389	21.086
Ctrl MO C-C	Clone- Clone	h13b11	13.022	1369.057	252.361	3179.44	21.086
Ctrl MO C-C	Clone- Clone	h13b11	13.022	1256.634	179.662	3049.896	21.086
Ctrl MO C-C	Clone- Clone	h13b11	13.022	1093.774	195.802	3252.823	21.086
Ctrl MO C-C	Clone- Clone	h13b11	13.022	894.567	144.973	3814.419	21.086
Ctrl MO C-C	Clone- Clone	h13b11	13.022	679.804	112.102	3885.421	21.086
Ctrl MO C-C	Clone- Clone
Ctrl MO C-C	Clone- Clone	h13b12	9.618	460.178	87.648	1192.687	15.551
Ctrl MO C-C	Clone- Clone	h13b12	9.618	666.613	114.088	1582.165	15.551
Ctrl MO C-C	Clone- Clone	h13b12	9.618	813.562	122.545	1966.639	15.551
Ctrl MO C-C	Clone- Clone	h13b12	9.618	923.025	121.264	2291.099	15.551
Ctrl MO C-C	Clone- Clone	h13b12	9.618	1026.668	54.615	2848.916	15.551
Ctrl MO C-C	Clone- Clone	h13b12	9.618	953.56	116.551	3115.877	15.551
Ctrl MO C-C	Clone- Clone	h13b12	9.618	902.573	107.555	3319.894	15.551
Ctrl MO C-C	Clone- Clone	h13b12	9.618	816.112	169.035	3524.748	15.551
Ctrl MO C-C	Clone- Clone	h13b12	9.618	772.568	168.4	3829.47	15.551
Ctrl MO C-C	Clone- Clone	h13b12	9.618	850.44	271.753	2310.1	15.551
Ctrl MO C-C	Clone- Clone
Ctrl MO C-C	Clone- Clone	h13b13	10.591	196.261	0	1016.68	17.132
Ctrl MO C-C	Clone- Clone	h13b13	10.591	211.123	0.038	968.869	17.132
Ctrl MO C-C	Clone- Clone	h13b13	10.591	193.822	2.256	1149.974	17.132
Ctrl MO C-C	Clone- Clone	h13b13	10.591	199.994	5.822	758.634	17.132
Ctrl MO C-C	Clone- Clone	h13b13	10.266	964.912	123.66	2968.695	16.605
Ctrl MO C-C	Clone- Clone	h13b13	10.266	859.175	91.851	3513.358	16.605
Ctrl MO C-C	Clone- Clone	h13b13	10.266	745.462	87.718	2630.222	16.605
Ctrl MO C-C	Clone- Clone	h13b13	10.266	615.354	89.927	2332.764	16.605
Ctrl MO C-C	Clone- Clone	h14b1	11.888	255.247	9.58	1003.762	19.24
Ctrl MO C-C	Clone- Clone	h14b1	11.888	388.796	18.096	1922.112	19.24
Ctrl MO C-C	Clone- Clone	h14b1	11.888	445.843	12.79	2169.653	19.24
Ctrl MO C-C	Clone- Clone	h14b1	11.888	391.895	37.268	2637.454	19.24
Ctrl MO C-C	Clone- Clone	h14b1	11.888	368.913	57.77	2143.534	19.24
Ctrl MO C-C	Clone- Clone	h14b1	11.888	363.119	21.325	2106.15	19.24
Ctrl MO C-C	Clone- Clone	h14b1	11.888	340.059	49.43	1269.552	19.24
Ctrl MO C-C	Clone- Clone	h14b1	11.888	319.541	18.924	1363.603	19.24
Ctrl MO C-C	Clone- Clone
Ctrl MO C-C	Clone- Clone	h14b2	10.05	84.965	0	430.262	16.254
Ctrl MO C-C	Clone- Clone	h14b2	10.05	146.757	2.49	1054.55	16.254
Ctrl MO C-C	Clone- Clone	h14b2	10.05	215.636	7.818	2002.418	16.254
Ctrl MO C-C	Clone- Clone	h14b2	10.05	285.756	29.049	1207.996	16.254
Ctrl MO C-C	Clone- Clone	h14b2	10.05	315.515	29.631	1386.586	16.254
Ctrl MO C-C	Clone- Clone	h14b2	10.591	361.911	46.5	1529.705	17.132
Ctrl MO C-C	Clone- Clone	h14b2	10.591	409.208	43.219	2518.74	17.132
Ctrl MO C-C	Clone- Clone	h14b2	10.591	413.454	25.428	3560.551	17.132
Ctrl MO C-C	Clone- Clone	h14b2	10.591	346.451	15.338	2690.163	17.132
Ctrl MO C-C	Clone- Clone	h15b1	11.942	143.333	9.474	733.153	19.329
Ctrl MO C-C	Clone- Clone	h15b1	11.942	202.863	4.213	725.305	19.329
Ctrl MO C-C	Clone- Clone	h15b1	11.942	241.168	14.942	802.045	19.329
Ctrl MO C-C	Clone- Clone	h15b1	11.942	259.865	34.566	929.109	19.329
Ctrl MO C-C	Clone- Clone	h15b1	11.942	282.769	36.512	1304.882	19.329
Ctrl MO C-C	Clone- Clone	h15b1	11.942	305.066	50.89	1273.953	19.329
Ctrl MO C-C	Clone- Clone	h15b1	11.942	336.669	46.089	2047.376	19.329
Ctrl MO C-C	Clone- Clone	h15b1	11.942	349.143	25.293	1914.448	19.329
Ctrl MO C-C	Clone- Clone	h15b1	11.942	335.653	8.684	2055.436	19.329
Ctrl MO C-C	Clone- Clone
Ctrl MO C-C	Clone- Clone	h15b2	8.591	175.182	7.569	601.669	13.882
Ctrl MO C-C	Clone- Clone	h15b2	8.591	228.509	28.441	770.853	13.882
Ctrl MO C-C	Clone- Clone	h15b2	8.591	278.731	18.029	1117.465	13.882
Ctrl MO C-C	Clone- Clone	h15b2	9.402	514.014	45.5	2734.945	15.2
Ctrl MO C-C	Clone- Clone	h15b2	9.402	587.176	20.275	3482.298	15.2
Ctrl MO C-C	Clone- Clone	h15b2	9.402	596.156	38.778	2751.522	15.2
Ctrl MO C-C	Clone- Clone	h15b2	9.402	488.92	48.212	2702.968	15.2
Ctrl MO C-C	Clone- Clone	h15b2	9.402	367.182	43.509	1154.733	15.2
Ctrl MO C-C	Clone- Clone
Ctrl MO C-C	Clone- Clone	h15b3	5.025	296.702	33.15	901.488	8.083
Ctrl MO C-C	Clone- Clone	h15b3	5.025	398.459	69.638	1409.445	8.083
Ctrl MO C-C	Clone- Clone	h15b3	5.025	496.413	70.372	1258.788	8.083
Ctrl MO C-C	Clone- Clone	h15b3	5.025	504.118	56.299	1379.615	8.083
Ctrl MO C-C	Clone- Clone	h15b3	5.025	471.318	30.398	1268.773	8.083
Ctrl MO C-C	Clone- Clone	h15b3	5.025	383.925	49.972	1339.39	8.083
Ctrl MO C-C	Clone- Clone
Ctrl MO C-C	Clone- Clone	h15b4	5.998	261.484	33.06	647.932	9.664
Ctrl MO C-C	Clone- Clone	h15b4	5.998	362.112	42.608	1186.299	9.664
Ctrl MO C-C	Clone- Clone	h15b4	5.998	524.662	29.235	1773.051	9.664
Ctrl MO C-C	Clone- Clone	h15b4	5.998	618.152	81.813	1744.038	9.664
Ctrl MO C-C	Clone- Clone	h15b4	5.998	564.563	61.054	1490.654	9.664
Ctrl MO C-C	Clone- Clone	h15b4	5.998	442.899	67.831	1274.162	9.664
Ctrl MO C-C	Clone- Clone	h15b4	5.998	318.413	48.309	839.172	9.664
Ctrl MO C-C	Clone- Clone
Ctrl MO C-C	Clone- Clone	h15b5	8.591	200.406	4.187	642.244	13.881
Ctrl MO C-C	Clone- Clone	h15b5	8.591	259.168	16.389	1067.631	13.881
Ctrl MO C-C	Clone- Clone	h15b5	8.591	303.196	10.468	1086.572	13.881
Ctrl MO C-C	Clone- Clone	h15b5	8.591	444.934	30.371	3180.76	13.881
Ctrl MO C-C	Clone- Clone	h15b5	8.591	519.251	35.573	3627.49	13.881
Ctrl MO C-C	Clone- Clone	h15b5	8.591	568.824	39.703	2944.331	13.881
Ctrl MO C-C	Clone- Clone	h15b5	8.591	574.778	23.04	2051.278	13.881
Ctrl MO C-C	Clone- Clone	h15b5	8.591	513.315	80.837	2480.918	13.881
Ctrl MO N-C	Non Clone- Clone	h9b1	9.186	472.044	35.46	1508.344	14.848
Ctrl MO N-C	Non Clone- Clone	h9b1	9.186	534.447	78.422	1919.207	14.848
Ctrl MO N-C	Non Clone- Clone	h9b1	9.186	549.404	78.939	1810.565	14.848
Ctrl MO N-C	Non Clone- Clone	h9b1	9.186	558.347	91.922	2367.147	14.848
Ctrl MO N-C	Non Clone- Clone	h9b1	9.186	540.166	84.762	2516.445	14.848
Ctrl MO N-C	Non Clone- Clone	h9b1	9.186	478.83	30.248	2135.86	14.848
Ctrl MO N-C	Non Clone- Clone	h9b1	9.186	432.218	9.501	3098.817	14.848
Ctrl MO N-C	Non Clone- Clone
Ctrl MO N-C	Non Clone- Clone	h9b2	10.483	259.372	14.275	764.159	16.957
Ctrl MO N-C	Non Clone- Clone	h9b2	10.483	382.165	48.002	1215.236	16.957
Ctrl MO N-C	Non Clone- Clone	h9b2	10.483	432.127	56.909	1986.684	16.957
Ctrl MO N-C	Non Clone- Clone	h9b2	10.483	511.236	56.586	2085.844	16.957
Ctrl MO N-C	Non Clone- Clone	h9b2	10.483	655.521	75.559	2516.26	16.957
Ctrl MO N-C	Non Clone- Clone	h9b2	10.483	834.096	51.612	3232.873	16.957
Ctrl MO N-C	Non Clone- Clone	h9b2	10.483	857.568	63.004	4044.261	16.957
Ctrl MO N-C	Non Clone- Clone
Ctrl MO N-C	Non Clone- Clone	h9b3	10.158	275.802	32.752	1141.735	16.43
Ctrl MO N-C	Non Clone- Clone	h9b3	10.158	426.804	66.303	1531.176	16.43
Ctrl MO N-C	Non Clone- Clone	h9b3	10.158	450.766	47.677	1675.287	16.43
Ctrl MO N-C	Non Clone- Clone	h9b3	10.158	397.903	50.468	1659.256	16.43
Ctrl MO N-C	Non Clone- Clone	h9b3	10.158	342.746	72.095	1156.146	16.43
Ctrl MO N-C	Non Clone- Clone	h9b3	10.321	817.889	76.6	3466.72	16.693
Ctrl MO N-C	Non Clone- Clone	h9b3	10.321	756.86	18.534	3644.454	16.693
Ctrl MO N-C	Non Clone- Clone	h9b3	10.321	638.157	33.575	3506.145	16.693
Ctrl MO N-C	Non Clone- Clone	h9b3	10.321	467.993	34.16	2527.971	16.693
Ctrl MO N-C	Non Clone- Clone	h10b1	8.375	232.76	11.125	744.723	13.53
Ctrl MO N-C	Non Clone- Clone	h10b1	8.375	348.365	31.012	1206.387	13.53
Ctrl MO N-C	Non Clone- Clone	h10b1	8.375	390.548	36.756	1466.578	13.53
Ctrl MO N-C	Non Clone- Clone	h10b1	8.321	702.521	52.271	2088.682	13.442
Ctrl MO N-C	Non Clone- Clone	h10b1	8.321	735.353	95.601	2598.902	13.442
Ctrl MO N-C	Non Clone- Clone	h10b1	8.321	764.734	80.525	2979.246	13.442
Ctrl MO N-C	Non Clone- Clone	h10b1	8.321	804.766	85.378	2895.384	13.442
Ctrl MO N-C	Non Clone- Clone	h10b1	8.321	750.165	60.558	2703.029	13.442
Ctrl MO N-C	Non Clone- Clone
Ctrl MO N-C	Non Clone- Clone	h10b2	11.401	443.735	50.781	1531.514	18.45
Ctrl MO N-C	Non Clone- Clone	h10b2	11.401	481.91	13.733	1512.963	18.45
Ctrl MO N-C	Non Clone- Clone	h10b2	11.401	538.943	48.055	2065.375	18.45
Ctrl MO N-C	Non Clone- Clone	h10b2	11.401	591.729	66.254	1864.535	18.45
Ctrl MO N-C	Non Clone- Clone	h10b2	11.401	534.705	88.831	1803.855	18.45
Ctrl MO N-C	Non Clone- Clone	h10b2	11.401	412.641	32.165	1371.355	18.45
Ctrl MO N-C	Non Clone- Clone
Ctrl MO N-C	Non Clone- Clone	h10b3	5.89	295.467	25.091	740.389	9.489
Ctrl MO N-C	Non Clone- Clone	h10b3	5.89	522.234	114.301	1539.303	9.489
Ctrl MO N-C	Non Clone- Clone	h10b3	5.89	662.075	159.622	2030.047	9.489
Ctrl MO N-C	Non Clone- Clone	h10b3	5.89	629.522	113.904	1623.145	9.489
Ctrl MO N-C	Non Clone- Clone	h10b3	5.89	543.333	127.286	1197.549	9.489
Ctrl MO N-C	Non Clone- Clone	h10b3	5.89	462.086	100.086	1300.587	9.489
Ctrl MO N-C	Non Clone- Clone	h10b3	5.89	272.394	55.348	770.12	9.489
Ctrl MO N-C	Non Clone- Clone	h12b1	16.318	557.751	15.571	2373.31	26.433
Ctrl MO N-C	Non Clone- Clone	h12b1	16.318	606.847	16.68	2818.232	26.433
Ctrl MO N-C	Non Clone- Clone	h12b1	16.318	521.348	50.26	2442.875	26.433
Ctrl MO N-C	Non Clone- Clone	h12b1	16.318	421.631	51.863	2567.298	26.433
Ctrl MO N-C	Non Clone- Clone	h12b1	16.318	383.041	64.11	2967.189	26.433
Ctrl MO N-C	Non Clone- Clone	h12b1	16.102	931.287	80.221	3745.728	26.084
Ctrl MO N-C	Non Clone- Clone	h12b1	16.102	876.774	105.537	4033.482	26.084
Ctrl MO N-C	Non Clone- Clone
Ctrl MO N-C	Non Clone- Clone	h12b2	11.888	585.878	89.425	2099.608	19.241
Ctrl MO N-C	Non Clone- Clone	h12b2	11.888	658.584	77.441	2835.575	19.241
Ctrl MO N-C	Non Clone- Clone	h12b2	11.888	732.191	67.136	2647.783	19.241
Ctrl MO N-C	Non Clone- Clone	h12b2	11.888	747.148	43.691	3358.982	19.241
Ctrl MO N-C	Non Clone- Clone	h12b2	11.888	703.937	57.099	3661.847	19.241
Ctrl MO N-C	Non Clone- Clone	h12b2	11.888	732.673	103.763	4049.631	19.241
[truncated: 1,482 more rows]
