# Supplementary material for: Stepwise polarisation of developing bilayered epidermis is mediated by aPKC and E-cadherin in zebrafish
Source: eLife. 2020 Jan 22;9:e49064. doi: 10.7554/eLife.49064 (PMC6975926; doi:10.7554/eLife.49064)
Supplement: Figure 1—figure supplement 4—source data 1. [file elife-49064-fig1-figsupp4-data1.csv]

Genotype	Treatment	Embryo	Cell	Cell name	Slice	Area	Mean	StdDev	Min	Max	Length	Non
Lyn-GFP	EcadmCh	Embryo 1	cell 1	Embryo 1cell 1	1	102.881	203.988	55.483	135.395	759.128	83.442	Non
Lyn-GFP	EcadmCh	Embryo 1	cell 1	Embryo 1cell 1	2	102.881	245.918	101.412	136.234	870.778	83.442	Non
Lyn-GFP	EcadmCh	Embryo 1	cell 1	Embryo 1cell 1	3	102.881	297.503	153.758	132.489	1227.127	83.442	Non
Lyn-GFP	EcadmCh	Embryo 1	cell 1	Embryo 1cell 1	4	102.881	357.371	200.014	131.821	2231.421	83.442	Non
Lyn-GFP	EcadmCh	Embryo 1	cell 1	Embryo 1cell 1	5	102.881	390.588	205.672	136.303	2304.081	83.442	Non
Lyn-GFP	EcadmCh	Embryo 1	cell 1	Embryo 1cell 1	6	102.881	410.353	204.44	143.802	2114.168	83.442	Non
Lyn-GFP	EcadmCh	Embryo 1	cell 1	Embryo 1cell 1	7	102.881	424.985	204.51	140.694	2328.272	83.442	Non
Lyn-GFP	EcadmCh	Embryo 1	cell 1	Embryo 1cell 1	8	102.881	442.41	217.433	141.699	2184.103	83.442	Non
Lyn-GFP	EcadmCh	Embryo 1	cell 1	Embryo 1cell 1	9	100.071	462.976	220.517	142.616	2174.317	81.17	Non
Lyn-GFP	EcadmCh	Embryo 1	cell 1	Embryo 1cell 1	10	100.071	482.796	233.262	148.734	2173.594	81.17	Non
Lyn-GFP	EcadmCh	Embryo 1	cell 1	Embryo 1cell 1	11	100.071	492.179	203.369	155.16	1528.338	81.17	Non
Lyn-GFP	EcadmCh	Embryo 1	cell 1	Embryo 1cell 1	12	87.968	507.553	178.897	164.973	1248.583	71.337	Non
Lyn-GFP	EcadmCh	Embryo 1	cell 1	Embryo 1cell 1	13	36.527	476.908	158.142	154.136	1215.951	29.52	Non
Lyn-GFP	EcadmCh	Embryo 1	cell 1	Embryo 1cell 1	14	27.882	467.107	152.083	149.641	1065.691	22.491	Non
Lyn-GFP	EcadmCh											Non
Lyn-GFP	EcadmCh											Non
Lyn-GFP	EcadmCh	Embryo 2	cell 1	Embryo 2cell 1	1	124.495	230.409	72.492	137.474	680.267	101.033	Non
Lyn-GFP	EcadmCh	Embryo 2	cell 1	Embryo 2cell 1	2	124.495	306.031	153.337	135.825	1160.794	101.033	Non
Lyn-GFP	EcadmCh	Embryo 2	cell 1	Embryo 2cell 1	3	124.495	507.781	391.562	134.197	2557.06	101.033	Non
Lyn-GFP	EcadmCh	Embryo 2	cell 1	Embryo 2cell 1	4	124.495	607.139	475.332	140.56	2994.572	101.033	Non
Lyn-GFP	EcadmCh	Embryo 2	cell 1	Embryo 2cell 1	5	124.495	637.963	461.754	140.425	3272.037	101.033	Non
Lyn-GFP	EcadmCh	Embryo 2	cell 1	Embryo 2cell 1	6	124.495	657.693	443.5	139.271	3936.64	101.033	Non
Lyn-GFP	EcadmCh	Embryo 2	cell 1	Embryo 2cell 1	7	124.063	709.753	458.53	133.425	3549.019	100.683	Non
Lyn-GFP	EcadmCh	Embryo 2	cell 1	Embryo 2cell 1	8	124.063	740.404	458.227	142.868	3895.229	100.683	Non
Lyn-GFP	EcadmCh	Embryo 2	cell 1	Embryo 2cell 1	9	124.063	768.408	466.208	143.523	3720.755	100.683	Non
Lyn-GFP	EcadmCh	Embryo 2	cell 1	Embryo 2cell 1	10	124.063	802.999	494.178	145.522	3632.387	100.683	Non
Lyn-GFP	EcadmCh	Embryo 2	cell 1	Embryo 2cell 1	11	125.359	788.374	489.209	136.664	3139.719	101.736	Non
Lyn-GFP	EcadmCh	Embryo 2	cell 1	Embryo 2cell 1	12	125.359	814.631	495.638	135.497	2993.169	101.736	Non
Lyn-GFP	EcadmCh	Embryo 2	cell 1	Embryo 2cell 1	13	126.224	848.862	463.053	148.329	3270.551	102.434	Non
Lyn-GFP	EcadmCh	Embryo 2	cell 1	Embryo 2cell 1	14	126.224	822.685	453.474	152.309	3618.004	102.434	Non
Lyn-GFP	EcadmCh	Embryo 2	cell 1	Embryo 2cell 1	15	94.668	791.079	446.376	167.189	3121.366	76.785	Non
Lyn-GFP	EcadmCh	Embryo 2	cell 1	Embryo 2cell 1	16	84.509	775.492	435.076	167.177	3356.236	68.522	Non
Lyn-GFP	EcadmCh	Embryo 2	cell 1	Embryo 2cell 1	17	82.348	671.278	354.965	156.856	2622.117	66.741	Non
Lyn-GFP	EcadmCh	Embryo 2	cell 1	Embryo 2cell 1	18	24.64	699.227	288.744	186.675	1802.8	19.852	Non
Lyn-GFP	EcadmCh	Embryo 2		Embryo 2								Non
Lyn-GFP	EcadmCh	Embryo 2	cell 2	Embryo 2cell 2	1	88.184	233.576	198.638	138.71	2468.375	71.513	Non
Lyn-GFP	EcadmCh	Embryo 2	cell 2	Embryo 2cell 2	2	88.184	272.149	253.47	136.193	2313.858	71.513	Non
Lyn-GFP	EcadmCh	Embryo 2	cell 2	Embryo 2cell 2	3	88.184	300.857	262.079	137.834	2294.471	71.513	Non
Lyn-GFP	EcadmCh	Embryo 2	cell 2	Embryo 2cell 2	4	88.184	342.95	283.206	137.923	3480.094	71.513	Non
Lyn-GFP	EcadmCh	Embryo 2	cell 2	Embryo 2cell 2	5	88.184	408.163	321.619	137.755	2841.067	71.513	Non
Lyn-GFP	EcadmCh	Embryo 2	cell 2	Embryo 2cell 2	6	88.184	457.55	352.808	138.27	2609.839	71.513	Non
Lyn-GFP	EcadmCh	Embryo 2	cell 2	Embryo 2cell 2	7	88.184	503.228	373.737	136.822	3107.08	71.513	Non
Lyn-GFP	EcadmCh	Embryo 2	cell 2	Embryo 2cell 2	8	88.184	529.945	362.379	140.853	3043.261	71.513	Non
Lyn-GFP	EcadmCh	Embryo 2	cell 2	Embryo 2cell 2	9	88.184	544.471	351.207	133.357	2573.873	71.513	Non
Lyn-GFP	EcadmCh	Embryo 2	cell 2	Embryo 2cell 2	10	88.184	565.903	341.88	141.755	2460.604	71.513	Non
Lyn-GFP	EcadmCh	Embryo 2	cell 2	Embryo 2cell 2	11	88.184	581.889	329.602	137.844	2126.283	71.513	Non
Lyn-GFP	EcadmCh	Embryo 2	cell 2	Embryo 2cell 2	12	88.184	585.413	315.469	135.503	2107.369	71.513	Non
Lyn-GFP	EcadmCh	Embryo 2	cell 2	Embryo 2cell 2	13	87.752	616.277	312.005	132.667	2218.109	71.16	Non
Lyn-GFP	EcadmCh	Embryo 2	cell 2	Embryo 2cell 2	14	87.752	643.347	323.98	141.963	2437.158	71.16	Non
Lyn-GFP	EcadmCh	Embryo 2	cell 2	Embryo 2cell 2	15	87.752	660.999	328.691	150.46	2730.297	71.16	Non
Lyn-GFP	EcadmCh	Embryo 2	cell 2	Embryo 2cell 2	16	87.752	659.282	319.264	152.573	2364.521	71.16	Non
Lyn-GFP	EcadmCh	Embryo 2	cell 2	Embryo 2cell 2	17	86.887	648.989	306.26	143.976	1939.232	70.459	Non
Lyn-GFP	EcadmCh	Embryo 2	cell 2	Embryo 2cell 2	18	39.553	631.763	309.404	149.763	1880.773	31.98	Non
Lyn-GFP	EcadmCh	Embryo 2	cell 2	Embryo 2cell 2	19	29.827	624.971	311.792	143.003	1923.83	24.073	Non
Lyn-GFP	EcadmCh	Embryo 2	cell 2	Embryo 2cell 2	20	29.611	638.159	305.999	152.514	1748.689	23.897	Non
Lyn-GFP	EcadmCh	Embryo 2	cell 2	Embryo 2cell 2	21	29.611	663.454	304.182	155.85	1838.238	23.897	Non
Lyn-GFP	EcadmCh											Non
Lyn-GFP	EcadmCh	Embryo 3	cell 1	Embryo 3cell 1	1	131.411	204.773	44.98	134.964	538.045	106.653	Non
Lyn-GFP	EcadmCh	Embryo 3	cell 1	Embryo 3cell 1	2	131.411	224.526	58.775	139.229	651.118	106.653	Non
Lyn-GFP	EcadmCh	Embryo 3	cell 1	Embryo 3cell 1	3	131.411	282.733	114.868	137.44	1027.337	106.653	Non
Lyn-GFP	EcadmCh	Embryo 3	cell 1	Embryo 3cell 1	4	131.411	417.241	266.84	138.231	2511.261	106.653	Non
Lyn-GFP	EcadmCh	Embryo 3	cell 1	Embryo 3cell 1	5	131.411	722.333	622.086	139.958	4081.195	106.653	Non
Lyn-GFP	EcadmCh	Embryo 3	cell 1	Embryo 3cell 1	6	131.411	974.193	735.174	143.796	4095	106.653	Non
Lyn-GFP	EcadmCh	Embryo 3	cell 1	Embryo 3cell 1	7	131.411	1029.994	709.689	148.899	4095	106.653	Non
Lyn-GFP	EcadmCh	Embryo 3	cell 1	Embryo 3cell 1	8	131.411	1056.311	669.518	146.27	4095	106.653	Non
Lyn-GFP	EcadmCh	Embryo 3	cell 1	Embryo 3cell 1	9	131.411	1066.978	640.323	159.964	4095	106.653	Non
Lyn-GFP	EcadmCh	Embryo 3	cell 1	Embryo 3cell 1	10	132.276	1160.567	680.698	151.775	4095	107.354	Non
Lyn-GFP	EcadmCh	Embryo 3	cell 1	Embryo 3cell 1	11	131.627	1379.14	708.895	209.38	4095	106.831	Non
Lyn-GFP	EcadmCh	Embryo 3	cell 1	Embryo 3cell 1	12	131.627	1445.232	693.788	225.958	4001.126	106.831	Non
Lyn-GFP	EcadmCh	Embryo 3	cell 1	Embryo 3cell 1	13	131.627	1401.163	602.304	278.129	4000.712	106.828	Non
Lyn-GFP	EcadmCh	Embryo 3	cell 1	Embryo 3cell 1	14	71.757	1390.121	607.54	285	3992.026	58.156	Non
Lyn-GFP	EcadmCh	Embryo 3	cell 1	Embryo 3cell 1	15	58.789	1298.824	587.443	386.174	3899.273	47.616	Non
Lyn-GFP	EcadmCh	Embryo 3	cell 1	Embryo 3cell 1	16	9.294	1419.486	590.425	469.9	3266.453	7.38	Non
Lyn-GFP	EcadmCh	Embryo 3		Embryo 3								Non
Lyn-GFP	EcadmCh	Embryo 3	cell 2	Embryo 3cell 2	1	109.797	197.984	47.235	0	500.88	89.084	Non
Lyn-GFP	EcadmCh	Embryo 3	cell 2	Embryo 3cell 2	2	109.797	217.276	61.576	0	672.32	89.084	Non
Lyn-GFP	EcadmCh	Embryo 3	cell 2	Embryo 3cell 2	3	109.797	279.802	124.837	0	1052.742	89.084	Non
Lyn-GFP	EcadmCh	Embryo 3	cell 2	Embryo 3cell 2	4	109.797	409.387	287.911	0	2476.552	89.084	Non
Lyn-GFP	EcadmCh	Embryo 3	cell 2	Embryo 3cell 2	5	109.797	660.914	539.638	0	4062.613	89.084	Non
Lyn-GFP	EcadmCh	Embryo 3	cell 2	Embryo 3cell 2	6	109.797	837.055	617.435	0	4095	89.084	Non
Lyn-GFP	EcadmCh	Embryo 3	cell 2	Embryo 3cell 2	7	109.797	865.957	603.664	0	4078.752	89.084	Non
Lyn-GFP	EcadmCh	Embryo 3	cell 2	Embryo 3cell 2	8	109.581	847.097	564.055	0	4089.882	88.909	Non
Lyn-GFP	EcadmCh	Embryo 3	cell 2	Embryo 3cell 2	9	109.581	862.897	569.698	0	4022.781	88.909	Non
Lyn-GFP	EcadmCh	Embryo 3	cell 2	Embryo 3cell 2	10	109.797	937.99	598.312	0	3984.316	89.084	Non
Lyn-GFP	EcadmCh	Embryo 3	cell 2	Embryo 3cell 2	11	107.204	1093.676	614.331	0	3969.505	86.976	Non
Lyn-GFP	EcadmCh	Embryo 3	cell 2	Embryo 3cell 2	12	107.204	1095.748	595.818	0	3743.612	86.976	Non
Lyn-GFP	EcadmCh	Embryo 3	cell 2	Embryo 3cell 2	13	74.135	1187.99	531.904	194.533	3763.348	60.094	Non
Lyn-GFP	EcadmCh	Embryo 3	cell 2	Embryo 3cell 2	14	65.706	1090.327	552.8	0	3646.096	53.241	Non
Lyn-GFP	EcadmCh	Embryo 3	cell 2	Embryo 3cell 2	15	42.579	1037.494	584.804	0	3625.129	34.44	Non
Lyn-GFP	EcadmCh	Embryo 3		Embryo 3								Non
Lyn-GFP	EcadmCh	Embryo 3	cell 3	Embryo 3cell 3	1	89.048	194.871	42.661	0	431.2	72.218	Non
Lyn-GFP	EcadmCh	Embryo 3	cell 3	Embryo 3cell 3	2	89.048	221.232	61.802	0	616.375	72.218	Non
Lyn-GFP	EcadmCh	Embryo 3	cell 3	Embryo 3cell 3	3	89.048	275.112	115.778	0	1318.195	72.218	Non
Lyn-GFP	EcadmCh	Embryo 3	cell 3	Embryo 3cell 3	4	89.048	432.192	308.839	0	3529.375	72.218	Non
Lyn-GFP	EcadmCh	Embryo 3	cell 3	Embryo 3cell 3	5	89.048	679.833	561.993	0	4050.992	72.218	Non
Lyn-GFP	EcadmCh	Embryo 3	cell 3	Embryo 3cell 3	6	89.697	804.688	648.378	0	4012.478	72.745	Non
Lyn-GFP	EcadmCh	Embryo 3	cell 3	Embryo 3cell 3	7	89.697	857.446	609.321	0	4084.23	72.745	Non
Lyn-GFP	EcadmCh	Embryo 3	cell 3	Embryo 3cell 3	8	89.697	864.907	566.679	0	4085.724	72.745	Non
Lyn-GFP	EcadmCh	Embryo 3	cell 3	Embryo 3cell 3	9	87.103	991.886	521.117	0	4095	70.635	Non
Lyn-GFP	EcadmCh	Embryo 3	cell 3	Embryo 3cell 3	10	87.103	1087.81	567.657	0	4068.189	70.634	Non
Lyn-GFP	EcadmCh	Embryo 3	cell 3	Embryo 3cell 3	11	87.103	1199.764	616.679	0	4093.487	70.634	Non
Lyn-GFP	EcadmCh	Embryo 3	cell 3	Embryo 3cell 3	12	87.103	1171.458	614.166	0	4093.257	70.634	Non
Lyn-GFP	EcadmCh	Embryo 3	cell 3	Embryo 3cell 3	13	87.535	1109.817	580.797	0	4072.842	70.985	Non
Lyn-GFP	EcadmCh	Embryo 3	cell 3	Embryo 3cell 3	14	60.518	1129.963	563.866	0	3535.45	49.024	Non
Lyn-GFP	EcadmCh	Embryo 3	cell 3	Embryo 3cell 3	15	27.882	1141.488	402.115	356.858	2951.449	22.491	Non
Lyn-GFP	EcadmCh	Embryo 3		Embryo 3								Non
Lyn-GFP	EcadmCh	Embryo 3	cell 4	Embryo 3cell 4	1	100.936	192.57	43.477	132.983	499.914	81.881	Non
Lyn-GFP	EcadmCh	Embryo 3	cell 4	Embryo 3cell 4	2	100.936	214.46	63.797	135.897	658.184	81.881	Non
Lyn-GFP	EcadmCh	Embryo 3	cell 4	Embryo 3cell 4	3	100.936	278.618	151.955	138.119	1385.497	81.881	Non
Lyn-GFP	EcadmCh	Embryo 3	cell 4	Embryo 3cell 4	4	100.936	404.495	317.22	133.972	2163.85	81.881	Non
Lyn-GFP	EcadmCh	Embryo 3	cell 4	Embryo 3cell 4	5	100.936	516.151	410.685	142.406	2785.096	81.881	Non
Lyn-GFP	EcadmCh	Embryo 3	cell 4	Embryo 3cell 4	6	100.936	645.22	501.73	139.494	3889.697	81.881	Non
Lyn-GFP	EcadmCh	Embryo 3	cell 4	Embryo 3cell 4	7	100.287	841.401	581.651	146.522	4095	81.353	Non
Lyn-GFP	EcadmCh	Embryo 3	cell 4	Embryo 3cell 4	8	100.287	901.855	584.19	146.264	4090.145	81.353	Non
Lyn-GFP	EcadmCh	Embryo 3	cell 4	Embryo 3cell 4	9	100.071	973.41	595.565	192.227	4016.24	81.178	Non
Lyn-GFP	EcadmCh	Embryo 3	cell 4	Embryo 3cell 4	10	100.071	1020.505	619.88	180.094	4047.056	81.178	Non
Lyn-GFP	EcadmCh	Embryo 3	cell 4	Embryo 3cell 4	11	99.207	1116.338	610.386	251.79	4015.964	80.475	Non
Lyn-GFP	EcadmCh	Embryo 3	cell 4	Embryo 3cell 4	12	99.207	1135.086	597.626	248.881	4021.604	80.475	Non
Lyn-GFP	EcadmCh	Embryo 3	cell 4	Embryo 3cell 4	13	99.207	1144.807	564.763	243.304	4095	80.475	Non
Lyn-GFP	EcadmCh	Embryo 3	cell 4	Embryo 3cell 4	14	74.783	1134.996	472.678	191.498	3357.901	60.618	Non
Lyn-GFP	EcadmCh	Embryo 3	cell 4	Embryo 3cell 4	15	70.461	962.462	412.259	211.364	2879.291	57.106	Non
Lyn-GFP	EcadmCh	Embryo 3	cell 4	Embryo 3cell 4	16	23.775	956.001	361.09	242.598	2496.244	19.153	Non
Lyn-GFP	EcadmCh											Non
Lyn-GFP	EcadmCh											Non
Lyn-GFP	EcadmCh	Embryo 4	cell 1	Embryo 4cell 1	1	110.446	191.727	40.174	137.902	617.986	89.612	Non
Lyn-GFP	EcadmCh	Embryo 4	cell 1	Embryo 4cell 1	2	110.446	209.069	51.584	129.056	566.483	89.612	Non
Lyn-GFP	EcadmCh	Embryo 4	cell 1	Embryo 4cell 1	3	110.446	216.767	56.705	130.896	522.32	89.612	Non
Lyn-GFP	EcadmCh	Embryo 4	cell 1	Embryo 4cell 1	4	110.446	238.368	76.81	139.347	739.129	89.612	Non
Lyn-GFP	EcadmCh	Embryo 4	cell 1	Embryo 4cell 1	5	110.446	293.093	132.597	135.538	951.915	89.612	Non
Lyn-GFP	EcadmCh	Embryo 4	cell 1	Embryo 4cell 1	6	110.446	363.222	219.867	137.717	1535.654	89.612	Non
Lyn-GFP	EcadmCh	Embryo 4	cell 1	Embryo 4cell 1	7	110.446	431.883	299.526	139.895	1871.982	89.612	Non
Lyn-GFP	EcadmCh	Embryo 4	cell 1	Embryo 4cell 1	8	110.446	527.516	395.08	139.228	2826.861	89.612	Non
Lyn-GFP	EcadmCh	Embryo 4	cell 1	Embryo 4cell 1	9	110.446	577.975	436.259	143.03	3012.897	89.612	Non
Lyn-GFP	EcadmCh	Embryo 4	cell 1	Embryo 4cell 1	10	110.446	597.93	436.634	141.013	3080.98	89.612	Non
Lyn-GFP	EcadmCh	Embryo 4	cell 1	Embryo 4cell 1	11	110.446	625.612	429.253	138.704	3018.973	89.612	Non
Lyn-GFP	EcadmCh	Embryo 4	cell 1	Embryo 4cell 1	12	110.446	638.829	418.866	144.72	3319.492	89.612	Non
Lyn-GFP	EcadmCh	Embryo 4	cell 1	Embryo 4cell 1	13	110.446	649.43	416.026	141.011	3298.4	89.612	Non
Lyn-GFP	EcadmCh	Embryo 4	cell 1	Embryo 4cell 1	14	110.446	657.478	409.409	147.421	3315.128	89.612	Non
Lyn-GFP	EcadmCh	Embryo 4	cell 1	Embryo 4cell 1	15	111.959	756.34	444.735	144.436	3307.507	90.842	Non
Lyn-GFP	EcadmCh	Embryo 4	cell 1	Embryo 4cell 1	16	111.959	793.293	449.667	143.675	3557.733	90.842	Non
Lyn-GFP	EcadmCh	Embryo 4	cell 1	Embryo 4cell 1	17	111.959	804.526	439.854	147.357	2823.865	90.842	Non
Lyn-GFP	EcadmCh	Embryo 4	cell 1	Embryo 4cell 1	18	112.391	807.335	418.548	155.128	3331.213	91.194	Non
Lyn-GFP	EcadmCh	Embryo 4	cell 1	Embryo 4cell 1	19	112.391	732.58	366.611	158.393	2896.177	91.194	Non
Lyn-GFP	EcadmCh	Embryo 4	cell 1	Embryo 4cell 1	20	95.316	612.3	307.026	148.098	2296.978	77.313	Non
Lyn-GFP	EcadmCh	Embryo 4	cell 1	Embryo 4cell 1	21	70.244	488.884	226.466	164.792	1630.291	56.931	Non
Lyn-GFP	EcadmCh	Embryo 4		Embryo 4								Non
Lyn-GFP	EcadmCh	Embryo 4	cell 2	Embryo 4cell 2	1	110.014	180.984	38.586	134.355	440.251	89.259	Non
Lyn-GFP	EcadmCh	Embryo 4	cell 2	Embryo 4cell 2	2	110.014	191.722	49.246	131.023	471.021	89.259	Non
Lyn-GFP	EcadmCh	Embryo 4	cell 2	Embryo 4cell 2	3	110.014	211.016	75.158	132.958	849.336	89.259	Non
Lyn-GFP	EcadmCh	Embryo 4	cell 2	Embryo 4cell 2	4	110.014	235.841	111.879	133.782	1002.723	89.259	Non
Lyn-GFP	EcadmCh	Embryo 4	cell 2	Embryo 4cell 2	5	110.014	264.602	148.456	130.716	1592.762	89.259	Non
Lyn-GFP	EcadmCh	Embryo 4	cell 2	Embryo 4cell 2	6	110.014	304.864	198.577	137.958	1670.72	89.259	Non
Lyn-GFP	EcadmCh	Embryo 4	cell 2	Embryo 4cell 2	7	110.014	328.346	225.23	134.773	2276.099	89.259	Non
Lyn-GFP	EcadmCh	Embryo 4	cell 2	Embryo 4cell 2	8	110.014	335.145	233.164	130.596	2614.119	89.259	Non
Lyn-GFP	EcadmCh	Embryo 4	cell 2	Embryo 4cell 2	9	110.014	346.12	236.916	136.785	3196.968	89.259	Non
Lyn-GFP	EcadmCh	Embryo 4	cell 2	Embryo 4cell 2	10	108.501	402.142	251.995	142.028	3358.117	88.029	Non
Lyn-GFP	EcadmCh	Embryo 4	cell 2	Embryo 4cell 2	11	108.501	406.559	247.066	136.933	3350.685	88.029	Non
Lyn-GFP	EcadmCh	Embryo 4	cell 2	Embryo 4cell 2	12	108.501	408.56	238.529	140.193	2765.569	88.029	Non
Lyn-GFP	EcadmCh	Embryo 4	cell 2	Embryo 4cell 2	13	108.501	424.378	245.122	139.847	2661.349	88.029	Non
Lyn-GFP	EcadmCh	Embryo 4	cell 2	Embryo 4cell 2	14	108.501	429.079	248.153	139.434	2645.53	88.029	Non
Lyn-GFP	EcadmCh	Embryo 4	cell 2	Embryo 4cell 2	15	97.045	488.249	255.957	143.331	2244.077	78.718	Non
Lyn-GFP	EcadmCh	Embryo 4	cell 2	Embryo 4cell 2	16	97.262	492.316	227.515	147.191	1647.935	78.893	Non
Lyn-GFP	EcadmCh	Embryo 4	cell 2	Embryo 4cell 2	17	96.181	476.863	197.534	151.284	1388.702	78.016	Non
Lyn-GFP	EcadmCh	Embryo 4	cell 2	Embryo 4cell 2	18	94.884	472.932	184.859	144.906	1373.993	76.963	Non
Lyn-GFP	EcadmCh	Embryo 4	cell 2	Embryo 4cell 2	19	57.06	445.158	195.164	146.474	1569.27	46.212	Non
Lyn-GFP	EcadmCh	Embryo 4	cell 2	Embryo 4cell 2	20	42.579	423.731	205.8	144.787	2067.272	34.44	Non
Lyn-GFP	EcadmCh	Embryo 4	cell 2	Embryo 4cell 2	21	33.069	406.57	165.503	167.294	1357.651	26.709	Non
Lyn-GFP	EcadmCh	Embryo 4	cell 2	Embryo 4cell 2	22	6.916	527.376	181.747	171.694	1257.201	5.447	Non
Lyn-GFP	EcadmCh	Embryo 4		Embryo 4								Non
Lyn-GFP	EcadmCh	Embryo 4	cell 3	Embryo 4cell 3	1	132.492	260.862	101.7	138.245	901.571	107.536	Non
Lyn-GFP	EcadmCh	Embryo 4	cell 3	Embryo 4cell 3	2	132.492	284.505	126.803	136.549	1079.527	107.536	Non
Lyn-GFP	EcadmCh	Embryo 4	cell 3	Embryo 4cell 3	3	132.492	342.012	193.255	129.241	1276.188	107.536	Non
Lyn-GFP	EcadmCh	Embryo 4	cell 3	Embryo 4cell 3	4	132.492	434.373	297.683	135.879	1912.893	107.536	Non
Lyn-GFP	EcadmCh	Embryo 4	cell 3	Embryo 4cell 3	5	132.924	507.744	365.396	130.489	2024.615	107.887	Non
Lyn-GFP	EcadmCh	Embryo 4	cell 3	Embryo 4cell 3	6	132.708	594.519	391.653	141.85	2537.818	107.711	Non
Lyn-GFP	EcadmCh	Embryo 4	cell 3	Embryo 4cell 3	7	132.708	617.376	379.796	140.191	3279.888	107.711	Non
Lyn-GFP	EcadmCh	Embryo 4	cell 3	Embryo 4cell 3	8	132.708	605.226	363.585	136.759	3467.375	107.711	Non
Lyn-GFP	EcadmCh	Embryo 4	cell 3	Embryo 4cell 3	9	130.979	633.153	343.03	143	3912.717	106.306	Non
Lyn-GFP	EcadmCh	Embryo 4	cell 3	Embryo 4cell 3	10	130.979	635.057	348.973	134.697	3933.458	106.306	Non
Lyn-GFP	EcadmCh	Embryo 4	cell 3	Embryo 4cell 3	11	123.63	681.639	370.274	147.803	3289.989	100.331	Non
Lyn-GFP	EcadmCh	Embryo 4	cell 3	Embryo 4cell 3	12	123.63	705.801	382.649	143.793	3052.242	100.331	Non
Lyn-GFP	EcadmCh	Embryo 4	cell 3	Embryo 4cell 3	13	123.198	708.217	410.423	147.923	3285.346	99.979	Non
Lyn-GFP	EcadmCh	Embryo 4	cell 3	Embryo 4cell 3	14	105.259	771.707	434.034	164.933	3197.212	85.397	Non
Lyn-GFP	EcadmCh	Embryo 4	cell 3	Embryo 4cell 3	15	103.746	808.74	418.641	173.979	2614.06	84.16	Non
Lyn-GFP	EcadmCh	Embryo 4	cell 3	Embryo 4cell 3	16	103.746	795.709	376.869	150.484	2979.672	84.159	Non
Lyn-GFP	EcadmCh	Embryo 4	cell 3	Embryo 4cell 3	17	99.855	658.647	307.831	169.803	2407.818	81.003	Non
Lyn-GFP	EcadmCh	Embryo 4	cell 3	Embryo 4cell 3	18	55.115	619.381	259.152	187.576	1881.607	44.63	Non
Lyn-GFP	EcadmCh	Embryo 4	cell 3	Embryo 4cell 3	19	53.818	535.87	226.664	163.812	1801.605	43.576	Non
Lyn-GFP	EcadmCh											Non
Lyn-GFP	EcadmCh	Embryo 5	cell 1	Embryo 5cell 1	1	104.61	199.628	53.914	138.546	609.02	84.867	Non
Lyn-GFP	EcadmCh	Embryo 5	cell 1	Embryo 5cell 1	2	104.61	235.416	100.523	138.322	981.848	84.867	Non
Lyn-GFP	EcadmCh	Embryo 5	cell 1	Embryo 5cell 1	3	104.61	288.932	174.795	139.206	1628.968	84.867	Non
Lyn-GFP	EcadmCh	Embryo 5	cell 1	Embryo 5cell 1	4	104.61	346.62	255.326	133.82	2803.445	84.867	Non
Lyn-GFP	EcadmCh	Embryo 5	cell 1	Embryo 5cell 1	5	104.61	445.998	338.235	138.437	3644.463	84.867	Non
Lyn-GFP	EcadmCh	Embryo 5	cell 1	Embryo 5cell 1	6	104.61	542.374	332.702	129.466	3834.68	84.867	Non
Lyn-GFP	EcadmCh	Embryo 5	cell 1	Embryo 5cell 1	7	104.61	575.213	337.57	135.723	3632.554	84.867	Non
Lyn-GFP	EcadmCh	Embryo 5	cell 1	Embryo 5cell 1	8	107.42	611.077	350.806	151.709	3321.943	87.147	Non
Lyn-GFP	EcadmCh	Embryo 5	cell 1	Embryo 5cell 1	9	107.42	628.895	342.748	156.545	3535.042	87.147	Non
Lyn-GFP	EcadmCh	Embryo 5	cell 1	Embryo 5cell 1	10	107.42	633.962	336.649	145.078	3444.787	87.147	Non
Lyn-GFP	EcadmCh	Embryo 5	cell 1	Embryo 5cell 1	11	107.42	636.441	336.936	151.332	3526.302	87.147	Non
Lyn-GFP	EcadmCh	Embryo 5	cell 1	Embryo 5cell 1	12	108.717	653.032	303.879	155.426	3604.179	88.196	Non
Lyn-GFP	EcadmCh	Embryo 5	cell 1	Embryo 5cell 1	13	108.717	665.798	296.759	163.057	2866.055	88.196	Non
Lyn-GFP	EcadmCh	Embryo 5	cell 1	Embryo 5cell 1	14	108.717	671.488	304.314	149.341	2821.58	88.195	Non
Lyn-GFP	EcadmCh	Embryo 5	cell 1	Embryo 5cell 1	15	108.068	664.171	290.742	161.405	2572.85	87.677	Non
Lyn-GFP	EcadmCh	Embryo 5	cell 1	Embryo 5cell 1	16	108.068	662.323	291.323	146.497	2998.657	87.677	Non
Lyn-GFP	EcadmCh	Embryo 5	cell 1	Embryo 5cell 1	17	108.068	656.881	285.574	190.813	2315.212	87.677	Non
Lyn-GFP	EcadmCh	Embryo 5	cell 1	Embryo 5cell 1	18	91.21	649.934	291.803	154.304	2373.05	73.969	Non
Lyn-GFP	EcadmCh	Embryo 5	cell 1	Embryo 5cell 1	19	91.21	628.143	279	154.262	2280.936	73.969	Non
Lyn-GFP	EcadmCh	Embryo 5	cell 1	Embryo 5cell 1	20	41.714	608.58	288.425	167.647	1994.031	33.727	Non
Lyn-GFP	EcadmCh	Embryo 5	cell 1	Embryo 5cell 1	21	44.74	655.745	281.491	183.747	2086.745	36.189	Non
Lyn-GFP	EcadmCh	Embryo 5	cell 1	Embryo 5cell 1	22	34.366	609.477	299.879	172.169	2180.246	27.76	Non
Lyn-GFP	EcadmCh	Embryo 5	cell 1	Embryo 5cell 1	23	32.421	634.98	273.941	189.618	2275.934	26.175	Non
Lyn-GFP	EcadmCh	Embryo 5	cell 1	Embryo 5cell 1	24	22.046	682.027	295.787	202.59	1973.797	17.744	Non
Lyn-GFP	EcadmCh	Embryo 5	cell 1	Embryo 5cell 1	25	7.133	848.489	315.279	315.749	1952.539	5.623	Non
Lyn-GFP	EcadmCh	Embryo 5	cell 1	Embryo 5cell 1	26	7.349	902.035	364.991	327.827	2218.181	5.799	Non
Lyn-GFP	EcadmCh	Embryo 5	cell 1	Embryo 5cell 1	27	12.536	786.657	274.71	279.368	2054.311	10.013	Non
Lyn-GFP	EcadmCh	Embryo 5		Embryo 5								Non
Lyn-GFP	EcadmCh	Embryo 5	cell 2	Embryo 5cell 2	1	112.175	220.296	63.362	137.535	679.481	91.015	Non
Lyn-GFP	EcadmCh	Embryo 5	cell 2	Embryo 5cell 2	2	112.175	289.097	141.904	132.23	1365.41	91.015	Non
Lyn-GFP	EcadmCh	Embryo 5	cell 2	Embryo 5cell 2	3	112.175	390.659	249.527	133.811	1759.895	91.015	Non
Lyn-GFP	EcadmCh	Embryo 5	cell 2	Embryo 5cell 2	4	112.175	504.122	344.901	138.81	2390.051	91.015	Non
Lyn-GFP	EcadmCh	Embryo 5	cell 2	Embryo 5cell 2	5	112.175	568.458	400.341	139.495	3628.426	91.015	Non
Lyn-GFP	EcadmCh	Embryo 5	cell 2	Embryo 5cell 2	6	112.175	582.103	386.861	140.268	3831.705	91.015	Non
Lyn-GFP	EcadmCh	Embryo 5	cell 2	Embryo 5cell 2	7	112.175	579.654	370.024	139.799	3762.859	91.015	Non
Lyn-GFP	EcadmCh	Embryo 5	cell 2	Embryo 5cell 2	8	114.985	591.086	369.524	142.479	3493.487	93.303	Non
Lyn-GFP	EcadmCh	Embryo 5	cell 2	Embryo 5cell 2	9	114.985	603.487	365.909	144.015	3391.962	93.303	Non
Lyn-GFP	EcadmCh	Embryo 5	cell 2	Embryo 5cell 2	10	114.985	622.999	375.557	138.078	3069.735	93.303	Non
Lyn-GFP	EcadmCh	Embryo 5	cell 2	Embryo 5cell 2	11	113.904	729.405	341.583	182.989	3218.462	92.419	Non
Lyn-GFP	EcadmCh	Embryo 5	cell 2	Embryo 5cell 2	12	113.904	731.622	339.167	160.422	2753.143	92.419	Non
Lyn-GFP	EcadmCh	Embryo 5	cell 2	Embryo 5cell 2	13	113.904	753.608	361.506	155.491	2959.844	92.419	Non
Lyn-GFP	EcadmCh	Embryo 5	cell 2	Embryo 5cell 2	14	113.472	845.167	372.753	177.037	2481.626	92.066	Non
Lyn-GFP	EcadmCh	Embryo 5	cell 2	Embryo 5cell 2	15	113.472	846.994	369.089	177.781	2429.589	92.066	Non
Lyn-GFP	EcadmCh	Embryo 5	cell 2	Embryo 5cell 2	16	114.336	789.872	365.839	161.264	2659.213	92.777	Non
Lyn-GFP	EcadmCh	Embryo 5	cell 2	Embryo 5cell 2	17	114.12	781.716	345.795	178.739	2563.043	92.601	Non
Lyn-GFP	EcadmCh	Embryo 5	cell 2	Embryo 5cell 2	18	51.441	779.21	341.687	208.901	2425.978	41.645	Non
Lyn-GFP	EcadmCh	Embryo 5	cell 2	Embryo 5cell 2	19	51.441	770.79	337.525	246.696	2484.555	41.645	Non
Lyn-GFP	EcadmCh											Non
Lyn-GFP	EcadmCh											Non
Lyn-GFP	EcadmCh											Non
Lyn-GFP	EcadmCh	Embryo 6	cell 1	Embryo 6cell 1	1	123.846	219.525	95.909	133.942	1009.183	100.498	Non
Lyn-GFP	EcadmCh	Embryo 6	cell 1	Embryo 6cell 1	2	123.846	254.03	145.368	137.413	1343.137	100.498	Non
Lyn-GFP	EcadmCh	Embryo 6	cell 1	Embryo 6cell 1	3	123.846	307.961	207.566	134.919	2411.539	100.498	Non
Lyn-GFP	EcadmCh	Embryo 6	cell 1	Embryo 6cell 1	4	123.846	339.12	232.244	136.65	2024.06	100.498	Non
Lyn-GFP	EcadmCh	Embryo 6	cell 1	Embryo 6cell 1	5	123.846	361.393	243.652	136.232	2461	100.498	Non
Lyn-GFP	EcadmCh	Embryo 6	cell 1	Embryo 6cell 1	6	123.846	396.851	251.97	138.077	2003.354	100.498	Non
Lyn-GFP	EcadmCh	Embryo 6	cell 1	Embryo 6cell 1	7	123.846	400.866	244.441	136.063	2569.276	100.498	Non
Lyn-GFP	EcadmCh	Embryo 6	cell 1	Embryo 6cell 1	8	123.846	411.085	251.596	131.548	3152.927	100.498	Non
Lyn-GFP	EcadmCh	Embryo 6	cell 1	Embryo 6cell 1	9	122.117	431.13	256.781	138.128	2608.615	99.093	Non
Lyn-GFP	EcadmCh	Embryo 6	cell 1	Embryo 6cell 1	10	120.172	489.331	269.225	142.339	2732.304	97.522	Non
Lyn-GFP	EcadmCh	Embryo 6	cell 1	Embryo 6cell 1	11	120.172	497.054	278.147	142.414	2887.894	97.522	Non
Lyn-GFP	EcadmCh	Embryo 6	cell 1	Embryo 6cell 1	12	118.443	548.955	290.539	141.596	2433.871	96.112	Non
Lyn-GFP	EcadmCh	Embryo 6	cell 1	Embryo 6cell 1	13	118.443	570.565	303.164	144.245	1910.472	96.112	Non
Lyn-GFP	EcadmCh	Embryo 6	cell 1	Embryo 6cell 1	14	98.775	608.47	261.721	162.523	2379.695	80.122	Non
Lyn-GFP	EcadmCh	Embryo 6	cell 1	Embryo 6cell 1	15	98.775	598.621	241.511	168.2	2041.539	80.122	Non
Lyn-GFP	EcadmCh	Embryo 6	cell 1	Embryo 6cell 1	16	38.256	597.282	236.741	189.579	1739.404	30.926	Non
Lyn-GFP	EcadmCh	Embryo 6	cell 1	Embryo 6cell 1	17	38.256	614.031	238.516	171.809	1684.546	30.926	Non
Lyn-GFP	EcadmCh	Embryo 6	cell 1	Embryo 6cell 1	18	34.798	598.053	229.92	187.121	1919.482	28.115	Non
Lyn-GFP	EcadmCh											Non
Lyn-GFP	EcadmCh											Non
Lyn-GFP	EcadmCh	Embryo 7	cell 1	Embryo 7cell 1	1	123.846	176.631	33.589	136.045	407.149	100.507	Non
Lyn-GFP	EcadmCh	Embryo 7	cell 1	Embryo 7cell 1	2	123.846	201.883	54.232	131.948	533.621	100.507	Non
Lyn-GFP	EcadmCh	Embryo 7	cell 1	Embryo 7cell 1	3	123.846	237.325	95.854	138.691	1349.068	100.507	Non
Lyn-GFP	EcadmCh	Embryo 7	cell 1	Embryo 7cell 1	4	123.414	303.209	159.341	135.965	1932.019	100.156	Non
Lyn-GFP	EcadmCh	Embryo 7	cell 1	Embryo 7cell 1	5	123.198	362.437	172.137	145.054	1888.926	99.977	Non
Lyn-GFP	EcadmCh	Embryo 7	cell 1	Embryo 7cell 1	6	123.198	385.925	164.379	144.61	1702.667	99.977	Non
Lyn-GFP	EcadmCh	Embryo 7	cell 1	Embryo 7cell 1	7	123.198	398.806	161.938	144.71	1814.91	99.977	Non
Lyn-GFP	EcadmCh	Embryo 7	cell 1	Embryo 7cell 1	8	123.198	397.258	158.015	142.707	1354.319	99.977	Non
Lyn-GFP	EcadmCh	Embryo 7	cell 1	Embryo 7cell 1	9	123.846	397.256	161.799	143.998	1728.218	100.507	Non
Lyn-GFP	EcadmCh	Embryo 7	cell 1	Embryo 7cell 1	10	77.377	370.524	149.886	149.165	1806.061	62.731	Non
Lyn-GFP	EcadmCh	Embryo 7		Embryo 7								Non
Lyn-GFP	EcadmCh	Embryo 7	cell 2	Embryo 7cell 2	1	124.279	190.931	41.232	128.847	442.408	100.855	Non
Lyn-GFP	EcadmCh	Embryo 7	cell 2	Embryo 7cell 2	2	124.279	227.741	79.627	136.862	915.639	100.855	Non
Lyn-GFP	EcadmCh	Embryo 7	cell 2	Embryo 7cell 2	3	124.279	281.863	134.829	134.744	1382.55	100.855	Non
Lyn-GFP	EcadmCh	Embryo 7	cell 2	Embryo 7cell 2	4	124.279	348.042	187.009	139.491	2306.181	100.855	Non
Lyn-GFP	EcadmCh	Embryo 7	cell 2	Embryo 7cell 2	5	124.711	373.116	181.377	143.486	2324.444	101.207	Non
Lyn-GFP	EcadmCh	Embryo 7	cell 2	Embryo 7cell 2	6	121.685	423.035	191.897	144.887	2651.088	98.746	Non
Lyn-GFP	EcadmCh	Embryo 7	cell 2	Embryo 7cell 2	7	121.685	448.44	188.667	144.436	1700.12	98.746	Non
Lyn-GFP	EcadmCh	Embryo 7	cell 2	Embryo 7cell 2	8	121.685	471.683	200.06	148.98	1856.561	98.746	Non
Lyn-GFP	EcadmCh	Embryo 7	cell 2	Embryo 7cell 2	9	122.333	478.022	196.831	148.605	2043.769	99.277	Non
Lyn-GFP	EcadmCh	Embryo 7	cell 2	Embryo 7cell 2	10	122.333	474.92	184.351	151.773	1402.949	99.277	Non
Lyn-GFP	EcadmCh	Embryo 7		Embryo 7								Non
Lyn-GFP	EcadmCh	Embryo 7	cell 3	Embryo 7cell 3	1	114.769	172.011	27.338	132.964	367.611	93.124	Non
Lyn-GFP	EcadmCh	Embryo 7	cell 3	Embryo 7cell 3	2	114.769	189.901	40.494	135.994	460.597	93.124	Non
Lyn-GFP	EcadmCh	Embryo 7	cell 3	Embryo 7cell 3	3	114.769	227.332	72.396	138.51	701.907	93.124	Non
Lyn-GFP	EcadmCh	Embryo 7	cell 3	Embryo 7cell 3	4	114.769	278.933	125.582	140.633	1330.422	93.124	Non
Lyn-GFP	EcadmCh	Embryo 7	cell 3	Embryo 7cell 3	5	114.769	326.714	162.296	137.15	1812.439	93.124	Non
Lyn-GFP	EcadmCh	Embryo 7	cell 3	Embryo 7cell 3	6	114.769	358.235	159.273	143.828	2480.207	93.124	Non
Lyn-GFP	EcadmCh	Embryo 7	cell 3	Embryo 7cell 3	7	113.688	396.342	164.11	145.736	1757.787	92.246	Non
Lyn-GFP	EcadmCh	Embryo 7	cell 3	Embryo 7cell 3	8	114.336	411.586	164.166	147.036	1698.563	92.774	Non
Lyn-GFP	EcadmCh	Embryo 7	cell 3	Embryo 7cell 3	9	114.336	421.921	158.894	153.701	1715.249	92.774	Non
Lyn-GFP	EcadmCh	Embryo 7	cell 3	Embryo 7cell 3	10	93.155	448.698	177.363	150.935	1693.448	75.556	Non
Lyn-GFP	EcadmCh	Embryo 7	cell 3	Embryo 7cell 3	11	65.489	482.388	165.142	141.877	1366.545	53.063	Non
Lyn-GFP	EcadmCh	Embryo 7	cell 3	Embryo 7cell 3	12	15.13	475.676	193.331	151.999	1140	12.125	Non
Lyn-GFP	EcadmCh											Non
Lyn-GFP	EcadmCh	Embryo 8	cell 1	Embryo 8cell 1	1	123.846	186.158	36.249	135.226	471.161	100.506	Non
Lyn-GFP	EcadmCh	Embryo 8	cell 1	Embryo 8cell 1	2	123.846	203.606	49.813	132.079	565.609	100.506	Non
Lyn-GFP	EcadmCh	Embryo 8	cell 1	Embryo 8cell 1	3	123.846	237.353	84.136	133.105	844.837	100.506	Non
Lyn-GFP	EcadmCh	Embryo 8	cell 1	Embryo 8cell 1	4	123.846	263.143	109.595	135.613	895.683	100.506	Non
Lyn-GFP	EcadmCh	Embryo 8	cell 1	Embryo 8cell 1	5	123.846	302.598	152.041	134.052	1276.405	100.506	Non
Lyn-GFP	EcadmCh	Embryo 8	cell 1	Embryo 8cell 1	6	123.846	338.841	185.607	139.613	2114.135	100.506	Non
Lyn-GFP	EcadmCh	Embryo 8	cell 1	Embryo 8cell 1	7	123.846	337.897	162.24	140.55	1963.585	100.506	Non
Lyn-GFP	EcadmCh	Embryo 8	cell 1	Embryo 8cell 1	8	124.927	360.058	160.105	142.557	1907.875	101.385	Non
Lyn-GFP	EcadmCh	Embryo 8	cell 1	Embryo 8cell 1	9	124.927	388.171	155.683	143.094	1555.367	101.385	Non
Lyn-GFP	EcadmCh	Embryo 8	cell 1	Embryo 8cell 1	10	124.927	417.044	177.714	145.468	1538.06	101.385	Non
Lyn-GFP	EcadmCh	Embryo 8	cell 1	Embryo 8cell 1	11	115.633	479.152	194.378	150.212	1502.092	93.83	Non
Lyn-GFP	EcadmCh	Embryo 8	cell 1	Embryo 8cell 1	12	95.965	503.887	197.651	152.445	1495.014	77.839	Non
Lyn-GFP	EcadmCh	Embryo 8	cell 1	Embryo 8cell 1	13	23.127	557.807	209.112	154.469	1644.257	18.626	Non
Lyn-GFP	EcadmCh	Embryo 8	cell 1	Embryo 8cell 1	14	12.752	642.249	214.547	253.825	1267.046	10.192	Non
Lyn-GFP	EcadmCh	Embryo 8		Embryo 8								Non
Lyn-GFP	EcadmCh	Embryo 8	cell 2	Embryo 8cell 2	1	113.256	191.692	45.674	134.125	460.567	91.897	Non
Lyn-GFP	EcadmCh	Embryo 8	cell 2	Embryo 8cell 2	2	113.256	211.239	68.5	137.286	747.667	91.897	Non
Lyn-GFP	EcadmCh	Embryo 8	cell 2	Embryo 8cell 2	3	113.256	246.028	111.251	141.17	1105.616	91.897	Non
Lyn-GFP	EcadmCh	Embryo 8	cell 2	Embryo 8cell 2	4	113.256	278.512	160.216	136.439	2170.866	91.897	Non
Lyn-GFP	EcadmCh	Embryo 8	cell 2	Embryo 8cell 2	5	113.256	321.844	211.235	138.757	2128.361	91.897	Non
Lyn-GFP	EcadmCh	Embryo 8	cell 2	Embryo 8cell 2	6	113.256	370.303	244.888	139.435	2855.096	91.897	Non
Lyn-GFP	EcadmCh	Embryo 8	cell 2	Embryo 8cell 2	7	113.256	402.799	241.51	137.349	2520.063	91.897	Non
Lyn-GFP	EcadmCh	Embryo 8	cell 2	Embryo 8cell 2	8	113.256	430.008	247.789	144.145	2519.444	91.897	Non
Lyn-GFP	EcadmCh	Embryo 8	cell 2	Embryo 8cell 2	9	113.256	468.689	252.221	140.916	2113.405	91.897	Non
Lyn-GFP	EcadmCh	Embryo 8	cell 2	Embryo 8cell 2	10	113.256	580.448	266.652	156.45	2246.269	91.895	Non
Lyn-GFP	EcadmCh	Embryo 8	cell 2	Embryo 8cell 2	11	113.256	594.808	258.596	152.445	2228.705	91.895	Non
Lyn-GFP	EcadmCh	Embryo 8	cell 2	Embryo 8cell 2	12	102.233	561.117	254.807	145.843	1937.301	82.935	Non
Lyn-GFP	EcadmCh	Embryo 8	cell 2	Embryo 8cell 2	13	29.827	543.758	271.013	149.305	1710.691	24.073	Non
Lyn-GFP	EcadmCh	Embryo 8	cell 2	Embryo 8cell 2	14	20.533	446.588	225.104	148.948	1617.096	16.517	Non
Lyn-GFP	EcadmCh											Non
Lyn-GFP	EcadmCh											Non
Lyn-GFP	EcadmCh	Embryo 9	cell 1	Embryo 9cell 1	1	108.501	201.107	43.515	137.316	456.665	88.026	Non
Lyn-GFP	EcadmCh	Embryo 9	cell 1	Embryo 9cell 1	2	108.501	209.918	50.622	140.369	540.672	88.026	Non
Lyn-GFP	EcadmCh	Embryo 9	cell 1	Embryo 9cell 1	3	108.501	225.366	60.948	139.271	573.402	88.026	Non
Lyn-GFP	EcadmCh	Embryo 9	cell 1	Embryo 9cell 1	4	108.501	275.611	101.256	139.347	842.56	88.026	Non
Lyn-GFP	EcadmCh	Embryo 9	cell 1	Embryo 9cell 1	5	108.501	329.558	154.019	140.307	1096.188	88.026	Non
Lyn-GFP	EcadmCh	Embryo 9	cell 1	Embryo 9cell 1	6	108.501	400.006	228.293	139.58	2299.007	88.026	Non
Lyn-GFP	EcadmCh	Embryo 9	cell 1	Embryo 9cell 1	7	108.501	459.723	281.584	143.987	2994.203	88.026	Non
Lyn-GFP	EcadmCh	Embryo 9	cell 1	Embryo 9cell 1	8	108.501	471.754	269.899	145.296	3151.01	88.026	Non
Lyn-GFP	EcadmCh	Embryo 9	cell 1	Embryo 9cell 1	9	108.501	488.223	258.755	154.869	2666.061	88.026	Non
Lyn-GFP	EcadmCh	Embryo 9	cell 1	Embryo 9cell 1	10	106.555	563.348	275.384	136.807	2308.406	86.446	Non
Lyn-GFP	EcadmCh	Embryo 9	cell 1	Embryo 9cell 1	11	107.204	630.707	300.286	157.296	2523.138	86.973	Non
Lyn-GFP	EcadmCh	Embryo 9	cell 1	Embryo 9cell 1	12	107.204	650.624	300.987	160.53	2076.453	86.973	Non
Lyn-GFP	EcadmCh	Embryo 9	cell 1	Embryo 9cell 1	13	106.772	615.184	263.789	154.496	2032.484	86.624	Non
Lyn-GFP	EcadmCh	Embryo 9	cell 1	Embryo 9cell 1	14	43.443	559.626	247.576	183.495	2025.879	35.143	Non
Lyn-GFP	EcadmCh	Embryo 9	cell 1	Embryo 9cell 1	15	16.859	549.331	280.031	169.913	1823.866	13.53	Non
Lyn-GFP	EcadmCh	Embryo 9		Embryo 9								Non
Lyn-GFP	EcadmCh	Embryo 9	cell 2	Embryo 9cell 2	1	78.242	202.732	46.302	132.229	490.328	63.431	Non
Lyn-GFP	EcadmCh	Embryo 9	cell 2	Embryo 9cell 2	2	78.242	212.191	53.451	140.556	584.717	63.431	Non
Lyn-GFP	EcadmCh	Embryo 9	cell 2	Embryo 9cell 2	3	78.242	230.622	67.882	134.712	657.38	63.431	Non
Lyn-GFP	EcadmCh	Embryo 9	cell 2	Embryo 9cell 2	4	78.242	277.562	111.733	138.121	827.292	63.431	Non
Lyn-GFP	EcadmCh	Embryo 9	cell 2	Embryo 9cell 2	5	78.242	334.095	174.204	141.568	1370.979	63.431	Non
Lyn-GFP	EcadmCh	Embryo 9	cell 2	Embryo 9cell 2	6	78.242	402.259	251.092	144.706	2525.28	63.431	Non
Lyn-GFP	EcadmCh	Embryo 9	cell 2	Embryo 9cell 2	7	78.242	490.729	321.122	144.712	3139.151	63.431	Non
Lyn-GFP	EcadmCh	Embryo 9	cell 2	Embryo 9cell 2	8	78.242	509.515	312.333	143.156	3086.904	63.431	Non
Lyn-GFP	EcadmCh	Embryo 9	cell 2	Embryo 9cell 2	9	78.242	521.997	283.754	161.768	3142.302	63.431	Non
Lyn-GFP	EcadmCh	Embryo 9	cell 2	Embryo 9cell 2	10	78.458	562.352	284.703	151.565	3362.766	63.608	Non
Lyn-GFP	EcadmCh	Embryo 9	cell 2	Embryo 9cell 2	11	78.458	613.018	283.472	158.559	2132.589	63.608	Non
Lyn-GFP	EcadmCh	Embryo 9	cell 2	Embryo 9cell 2	12	80.403	651.706	298.779	150.445	2119.757	65.188	Non
Lyn-GFP	EcadmCh	Embryo 9	cell 2	Embryo 9cell 2	13	80.403	656.631	294.451	153.961	2177.331	65.188	Non
Lyn-GFP	EcadmCh	Embryo 9	cell 2	Embryo 9cell 2	14	80.403	605.604	269.436	168.1	2839.82	65.188	Non
Lyn-GFP	EcadmCh	Embryo 9	cell 2	Embryo 9cell 2	15	61.815	616.851	275.727	159.549	1859.72	50.077	Non
Lyn-GFP	EcadmCh	Embryo 9	cell 2	Embryo 9cell 2	16	26.585	581.063	265.427	178.05	2003.497	21.437	Non
Lyn-GFP	EcadmCh	Embryo 9		Embryo 9								Non
Lyn-GFP	EcadmCh	Embryo 9	cell 3	Embryo 9cell 3	1	114.553	189.377	43.017	136.565	1061.966	92.948	Non
Lyn-GFP	EcadmCh	Embryo 9	cell 3	Embryo 9cell 3	2	114.553	194.723	42.856	137.596	567.896	92.948	Non
Lyn-GFP	EcadmCh	Embryo 9	cell 3	Embryo 9cell 3	3	114.553	205.888	50.744	133.092	481.472	92.948	Non
Lyn-GFP	EcadmCh	Embryo 9	cell 3	Embryo 9cell 3	4	114.553	227.056	69.585	135.012	720.087	92.948	Non
Lyn-GFP	EcadmCh	Embryo 9	cell 3	Embryo 9cell 3	5	114.553	263.274	109.362	140.648	899.855	92.948	Non
Lyn-GFP	EcadmCh	Embryo 9	cell 3	Embryo 9cell 3	6	114.553	314.134	168.593	134.638	1693.782	92.948	Non
Lyn-GFP	EcadmCh	Embryo 9	cell 3	Embryo 9cell 3	7	114.553	420.03	273.061	138.192	2113.128	92.948	Non
Lyn-GFP	EcadmCh	Embryo 9	cell 3	Embryo 9cell 3	8	114.553	505.2	324.38	143.902	2606.858	92.948	Non
Lyn-GFP	EcadmCh	Embryo 9	cell 3	Embryo 9cell 3	9	114.553	553.341	359.405	140.988	3319.786	92.948	Non
Lyn-GFP	EcadmCh	Embryo 9	cell 3	Embryo 9cell 3	10	114.553	565.059	333.727	147.001	3366.434	92.948	Non
Lyn-GFP	EcadmCh	Embryo 9	cell 3	Embryo 9cell 3	11	114.553	574.393	320.242	155.87	3205.345	92.948	Non
Lyn-GFP	EcadmCh	Embryo 9	cell 3	Embryo 9cell 3	12	115.633	645.231	328.573	156.575	2871.549	93.826	Non
Lyn-GFP	EcadmCh	Embryo 9	cell 3	Embryo 9cell 3	13	115.633	666.165	325.585	161.668	2580.274	93.826	Non
Lyn-GFP	EcadmCh	Embryo 9	cell 3	Embryo 9cell 3	14	115.633	660.071	322.285	165.822	2193.471	93.826	Non
Lyn-GFP	EcadmCh	Embryo 9	cell 3	Embryo 9cell 3	15	106.339	691.543	306.832	168.646	2259.572	86.265	Non
Lyn-GFP	EcadmCh	Embryo 9	cell 3	Embryo 9cell 3	16	106.339	651.008	271.576	196.948	2110.855	86.265	Non
Lyn-GFP	EcadmCh	Embryo 9	cell 3	Embryo 9cell 3	17	77.161	633.44	246.178	195.853	1835.019	62.553	Non
Lyn-GFP	EcadmCh	Embryo 9	cell 3	Embryo 9cell 3	18	46.469	589.852	230.717	172.124	1676.09	37.603	Non
Lyn-GFP	EcadmCh	Embryo 9	cell 3	Embryo 9cell 3	19	12.968	565.908	235.569	192.223	1648.52	10.367	Non
Lyn-GFP	EcadmCh	Embryo 9		Embryo 9								Non
Lyn-GFP	EcadmCh	Embryo 9		Embryo 9								Non
Lyn-GFP	EcadmCh	Embryo 9	cell 4	Embryo 9cell 4	1	113.688	199.444	44.616	138.515	503.942	92.245	Non
Lyn-GFP	EcadmCh	Embryo 9	cell 4	Embryo 9cell 4	2	113.688	224.549	66.641	136.663	683.557	92.245	Non
Lyn-GFP	EcadmCh	Embryo 9	cell 4	Embryo 9cell 4	3	113.688	276.739	118.593	140.519	955.117	92.245	Non
Lyn-GFP	EcadmCh	Embryo 9	cell 4	Embryo 9cell 4	4	113.688	368.582	220.748	140.731	1922.98	92.245	Non
Lyn-GFP	EcadmCh	Embryo 9	cell 4	Embryo 9cell 4	5	113.688	428.688	272.448	141.877	2695.711	92.245	Non
Lyn-GFP	EcadmCh	Embryo 9	cell 4	Embryo 9cell 4	6	113.688	480.045	307.686	141.241	3352.866	92.245	Non
Lyn-GFP	EcadmCh	Embryo 9	cell 4	Embryo 9cell 4	7	113.688	522.485	329.861	145.549	3489.573	92.245	Non
Lyn-GFP	EcadmCh	Embryo 9	cell 4	Embryo 9cell 4	8	113.688	532.221	306.956	147.102	3041.275	92.245	Non
Lyn-GFP	EcadmCh	Embryo 9	cell 4	Embryo 9cell 4	9	115.633	567.583	304.291	154.981	3749.188	93.826	Non
Lyn-GFP	EcadmCh	Embryo 9	cell 4	Embryo 9cell 4	10	115.417	598.115	310.837	137.48	3200.117	93.649	Non
Lyn-GFP	EcadmCh	Embryo 9	cell 4	Embryo 9cell 4	11	115.417	622.788	304.129	160.382	3054.804	93.649	Non
Lyn-GFP	EcadmCh	Embryo 9	cell 4	Embryo 9cell 4	12	118.011	651.173	304.02	161.287	2387.395	95.758	Non
Lyn-GFP	EcadmCh	Embryo 9	cell 4	Embryo 9cell 4	13	118.011	667.12	298.297	166.286	2236.968	95.758	Non
Lyn-GFP	EcadmCh	Embryo 9	cell 4	Embryo 9cell 4	14	106.339	707.086	294.9	172.948	2125.356	86.268	Non
Lyn-GFP	EcadmCh	Embryo 9	cell 4	Embryo 9cell 4	15	106.339	670.947	267.305	184.61	2153.808	86.268	Non
Lyn-GFP	EcadmCh	Embryo 9	cell 4	Embryo 9cell 4	16	87.968	627.142	249.078	174.282	1852.049	71.333	Non
Lyn-GFP	EcadmCh	Embryo 9	cell 4	Embryo 9cell 4	17	32.421	575.023	210.232	205.68	1711.897	26.182	Non
Lyn-GFP	EcadmCh	Embryo 9		Embryo 9								Non
Lyn-GFP	EcadmCh	Embryo 9	cell 5	Embryo 9cell 5	1	108.933	185.096	34.979	140.567	402.404	88.378	Non
Lyn-GFP	EcadmCh	Embryo 9	cell 5	Embryo 9cell 5	2	108.933	201.112	45.917	134.987	513.275	88.378	Non
Lyn-GFP	EcadmCh	Embryo 9	cell 5	Embryo 9cell 5	3	108.933	236.042	78.061	137.454	728.098	88.378	Non
Lyn-GFP	EcadmCh	Embryo 9	cell 5	Embryo 9cell 5	4	108.933	277.913	123.727	140.019	962.463	88.378	Non
Lyn-GFP	EcadmCh	Embryo 9	cell 5	Embryo 9cell 5	5	108.933	327.387	180.887	136.498	1430.481	88.378	Non
Lyn-GFP	EcadmCh	Embryo 9	cell 5	Embryo 9cell 5	6	108.933	403.306	254.535	140.254	2119.631	88.378	Non
Lyn-GFP	EcadmCh	Embryo 9	cell 5	Embryo 9cell 5	7	108.933	465.446	288.303	142.752	2663.975	88.378	Non
Lyn-GFP	EcadmCh	Embryo 9	cell 5	Embryo 9cell 5	8	108.933	472.959	281.054	141.243	2743.654	88.378	Non
Lyn-GFP	EcadmCh	Embryo 9	cell 5	Embryo 9cell 5	9	106.555	463.162	290.202	145.133	2794.092	86.448	Non
Lyn-GFP	EcadmCh	Embryo 9	cell 5	Embryo 9cell 5	10	106.555	478.866	287.834	145.868	2641.141	86.448	Non
Lyn-GFP	EcadmCh	Embryo 9	cell 5	Embryo 9cell 5	11	106.555	494.887	277.368	152.874	2432.972	86.448	Non
Lyn-GFP	EcadmCh	Embryo 9	cell 5	Embryo 9cell 5	12	106.555	511.791	279.021	158.835	2455.943	86.448	Non
Lyn-GFP	EcadmCh	Embryo 9	cell 5	Embryo 9cell 5	13	106.555	548.334	276.723	149.87	1984.616	86.448	Non
Lyn-GFP	EcadmCh	Embryo 9	cell 5	Embryo 9cell 5	14	106.555	560.875	261.588	146.85	1836.758	86.448	Non
Lyn-GFP	EcadmCh	Embryo 9	cell 5	Embryo 9cell 5	15	107.42	603.881	255.542	169.021	2226.522	87.15	Non
Lyn-GFP	EcadmCh	Embryo 9	cell 5	Embryo 9cell 5	16	93.155	594.431	241.941	161.551	1767.286	75.552	Non
Lyn-GFP	EcadmCh	Embryo 9	cell 5	Embryo 9cell 5	17	48.199	663.975	235.723	217.592	1861.361	39.007	Non
Lyn-GFP	EcadmCh	Embryo 9	cell 5	Embryo 9cell 5	18	31.124	610.159	229.285	179.489	1481.115	25.126	Non
Lyn-GFP	EcadmCh	Embryo 9		Embryo 9								Non
Lyn-GFP	EcadmCh	Embryo 9	cell 6	Embryo 9cell 6	1	132.492	204.649	53.467	132.118	718.069	107.529	Non
Lyn-GFP	EcadmCh	Embryo 9	cell 6	Embryo 9cell 6	2	132.492	239.71	92.581	137.761	954.099	107.529	Non
Lyn-GFP	EcadmCh	Embryo 9	cell 6	Embryo 9cell 6	3	132.492	290.409	150.204	130.451	1302.906	107.529	Non
Lyn-GFP	EcadmCh	Embryo 9	cell 6	Embryo 9cell 6	4	132.492	345.822	214.33	135.527	1592.514	107.529	Non
Lyn-GFP	EcadmCh	Embryo 9	cell 6	Embryo 9cell 6	5	132.492	410.572	281.836	139.572	2445.947	107.529	Non
Lyn-GFP	EcadmCh	Embryo 9	cell 6	Embryo 9cell 6	6	132.492	455.486	295.779	139.01	2937.226	107.529	Non
Lyn-GFP	EcadmCh	Embryo 9	cell 6	Embryo 9cell 6	7	132.492	460.981	273.718	142.738	3172.52	107.529	Non
Lyn-GFP	EcadmCh	Embryo 9	cell 6	Embryo 9cell 6	8	130.763	502.525	258.486	145.079	3019.04	106.124	Non
Lyn-GFP	EcadmCh	Embryo 9	cell 6	Embryo 9cell 6	9	130.763	519.944	263.296	147.858	3132.904	106.124	Non
Lyn-GFP	EcadmCh	Embryo 9	cell 6	Embryo 9cell 6	10	130.763	533.551	273.238	148.727	2867.022	106.124	Non
Lyn-GFP	EcadmCh	Embryo 9	cell 6	Embryo 9cell 6	11	129.25	588.6	284.106	148.699	2814.607	104.889	Non
Lyn-GFP	EcadmCh	Embryo 9	cell 6	Embryo 9cell 6	12	129.25	619.321	301.358	146.571	2800.914	104.889	Non
Lyn-GFP	EcadmCh	Embryo 9	cell 6	Embryo 9cell 6	13	126.872	653.061	303.637	155.455	2144.357	102.965	Non
Lyn-GFP	EcadmCh	Embryo 9	cell 6	Embryo 9cell 6	14	126.872	629.574	294.728	168.13	2597.847	102.965	Non
Lyn-GFP	EcadmCh	Embryo 9	cell 6	Embryo 9cell 6	15	99.207	576.546	230.295	153.351	1769.745	80.475	Non
Lyn-GFP	EcadmCh	Embryo 9	cell 6	Embryo 9cell 6	16	99.207	498.626	199.704	151.2	2010.707	80.475	Non
Lyn-GFP	EcadmCh											Non
Lyn-GFP	EcadmCh											Non
Lyn-GFP	EcadmCh	Embryo 10	cell 1	Embryo 10cell 1	1	117.146	211.481	61.3	136.423	646.534	95.051	Non
Lyn-GFP	EcadmCh	Embryo 10	cell 1	Embryo 10cell 1	2	117.146	250.606	106.481	140.283	996.861	95.051	Non
Lyn-GFP	EcadmCh	Embryo 10	cell 1	Embryo 10cell 1	3	117.146	271.558	129.59	136.186	1481.653	95.051	Non
Lyn-GFP	EcadmCh	Embryo 10	cell 1	Embryo 10cell 1	4	117.146	292.56	146.395	132.799	1824.29	95.051	Non
Lyn-GFP	EcadmCh	Embryo 10	cell 1	Embryo 10cell 1	5	117.146	308.584	151.676	133.793	1730.11	95.051	Non
Lyn-GFP	EcadmCh	Embryo 10	cell 1	Embryo 10cell 1	6	117.146	321.359	159.904	137.614	1478.604	95.051	Non
Lyn-GFP	EcadmCh	Embryo 10	cell 1	Embryo 10cell 1	7	117.146	328.455	161.579	141.599	1639.175	95.051	Non
Lyn-GFP	EcadmCh	Embryo 10	cell 1	Embryo 10cell 1	8	117.146	330.511	150.841	135.706	1360.327	95.051	Non
Lyn-GFP	EcadmCh	Embryo 10	cell 1	Embryo 10cell 1	9	113.904	360.079	150.959	141.485	1351.095	92.423	Non
Lyn-GFP	EcadmCh	Embryo 10	cell 1	Embryo 10cell 1	10	113.904	377.97	149.136	143.859	1268.315	92.423	Non
Lyn-GFP	EcadmCh	Embryo 10	cell 1	Embryo 10cell 1	11	116.065	397.797	148.852	132.743	1176.752	94.176	Non
Lyn-GFP	EcadmCh	Embryo 10	cell 1	Embryo 10cell 1	12	117.578	404.135	150.844	133.095	1145.638	95.409	Non
Lyn-GFP	EcadmCh	Embryo 10	cell 1	Embryo 10cell 1	13	117.578	395.79	140.935	147.565	1131.766	95.409	Non
Lyn-GFP	EcadmCh	Embryo 10	cell 1	Embryo 10cell 1	14	105.042	379.856	128.633	149.344	969.519	85.219	Non
Lyn-GFP	EcadmCh	Embryo 10	cell 1	Embryo 10cell 1	15	54.466	357.855	123.787	148.139	841.553	44.103	Non
Lyn-GFP	EcadmCh	Embryo 10	cell 1	Embryo 10cell 1	16	18.804	340.572	110.255	151.547	819.733	15.111	Non
Lyn-GFP	EcadmCh	Embryo 10		Embryo 10								Non
Lyn-GFP	EcadmCh	Embryo 10	cell 2	Embryo 10cell 2	1	134.653	220.441	62.265	137.3	618.263	109.293	Non
Lyn-GFP	EcadmCh	Embryo 10	cell 2	Embryo 10cell 2	2	134.653	248.221	100.346	139.505	970.118	109.293	Non
Lyn-GFP	EcadmCh	Embryo 10	cell 2	Embryo 10cell 2	3	134.653	290.344	146.147	129.487	1333.874	109.293	Non
Lyn-GFP	EcadmCh	Embryo 10	cell 2	Embryo 10cell 2	4	134.653	291.799	143.204	138.195	1615.443	109.293	Non
Lyn-GFP	EcadmCh	Embryo 10	cell 2	Embryo 10cell 2	5	134.653	293.812	135.127	138.056	1775.357	109.293	Non
Lyn-GFP	EcadmCh	Embryo 10	cell 2	Embryo 10cell 2	6	140.921	295.475	124.418	141.297	1282.169	114.389	Non
Lyn-GFP	EcadmCh	Embryo 10	cell 2	Embryo 10cell 2	7	140.921	306.079	122.257	142.674	1189.546	114.389	Non
Lyn-GFP	EcadmCh	Embryo 10	cell 2	Embryo 10cell 2	8	138.544	346.496	129.758	142.071	1108.314	112.457	Non
Lyn-GFP	EcadmCh	Embryo 10	cell 2	Embryo 10cell 2	9	138.976	393.661	145.008	141.741	1327.022	112.807	Non
Lyn-GFP	EcadmCh	Embryo 10	cell 2	Embryo 10cell 2	10	136.382	431.414	155.56	148.262	1251.539	110.695	Non
Lyn-GFP	EcadmCh	Embryo 10	cell 2	Embryo 10cell 2	11	128.818	441.932	154.699	152.577	1123.248	104.55	Non
Lyn-GFP	EcadmCh	Embryo 10	cell 2	Embryo 10cell 2	12	122.117	389.037	155.482	144.382	1164.408	99.104	Non
Lyn-GFP	EcadmCh	Embryo 10	cell 2	Embryo 10cell 2	13	31.556	429.587	153.725	150.022	1162.749	25.479	Non
Lyn-GFP	EcadmCh	Embryo 10		Embryo 10								Non
Lyn-GFP	EcadmCh	Embryo 10	cell 3	Embryo 10cell 3	1	104.826	200.981	54.033	138.683	587.064	85.041	Non
Lyn-GFP	EcadmCh	Embryo 10	cell 3	Embryo 10cell 3	2	104.826	208.758	65.897	134.489	633.292	85.041	Non
Lyn-GFP	EcadmCh	Embryo 10	cell 3	Embryo 10cell 3	3	104.826	224.012	83.021	132.06	818.261	85.041	Non
Lyn-GFP	EcadmCh	Embryo 10	cell 3	Embryo 10cell 3	4	104.826	243.522	105.685	135.457	957.308	85.041	Non
Lyn-GFP	EcadmCh	Embryo 10	cell 3	Embryo 10cell 3	5	104.826	270.077	128.999	136.82	1082.48	85.041	Non
Lyn-GFP	EcadmCh	Embryo 10	cell 3	Embryo 10cell 3	6	104.826	284.787	144.353	132.222	1392.734	85.041	Non
Lyn-GFP	EcadmCh	Embryo 10	cell 3	Embryo 10cell 3	7	104.826	295.115	153.202	139.524	2292.084	85.041	Non
Lyn-GFP	EcadmCh	Embryo 10	cell 3	Embryo 10cell 3	8	103.53	302.305	142.798	136.456	2075.032	83.99	Non
Lyn-GFP	EcadmCh	Embryo 10	cell 3	Embryo 10cell 3	9	103.53	302.76	136.458	137.969	1701.334	83.99	Non
Lyn-GFP	EcadmCh	Embryo 10	cell 3	Embryo 10cell 3	10	102.233	335.849	148.733	143.842	1872.474	82.937	Non
Lyn-GFP	EcadmCh	Embryo 10	cell 3	Embryo 10cell 3	11	102.233	334.106	142.832	143.995	1626.625	82.937	Non
Lyn-GFP	EcadmCh	Embryo 10	cell 3	Embryo 10cell 3	12	97.478	353.819	147.012	143.107	1417.116	79.07	Non
Lyn-GFP	EcadmCh	Embryo 10	cell 3	Embryo 10cell 3	13	60.951	365.676	162.529	145.357	1247.499	49.374	Non
Lyn-GFP	EcadmCh	Embryo 10	cell 3	Embryo 10cell 3	14	19.02	446.12	173.219	159.782	1164.361	15.287	Non
Lyn-GFP	EcadmCh	Embryo 10	cell 3	Embryo 10cell 3	15	57.925	316.89	178.423	0	1262.938	46.916	Non
Lyn-GFP	EcadmCh	Embryo 10	cell 3	Embryo 10cell 3	16	59.87	349.121	160.515	141.346	1382.371	48.496	Non
Lyn-GFP	EcadmCh	Embryo 10	cell 3	Embryo 10cell 3	17	28.746	359.356	154.729	145.573	1017.647	23.194	Non
Lyn-GFP	EcadmCh	Embryo 10	cell 3	Embryo 10cell 3	18	27.666	406.513	147.019	149.459	1072.757	22.315	Non
Lyn-GFP	EcadmCh											Non
Lyn-GFP	EcadmCh	Embryo 11	cell 1	Embryo 11cell 1	1	99.855	219.025	56.951	140.259	701.822	81.001	Non
Lyn-GFP	EcadmCh	Embryo 11	cell 1	Embryo 11cell 1	2	99.855	260.73	93.568	137.878	885.117	81.001	Non
Lyn-GFP	EcadmCh	Embryo 11	cell 1	Embryo 11cell 1	3	99.855	309.404	136.607	133.612	987.898	81.001	Non
Lyn-GFP	EcadmCh	Embryo 11	cell 1	Embryo 11cell 1	4	99.855	357.831	188.131	139.584	1680.951	81.001	Non
Lyn-GFP	EcadmCh	Embryo 11	cell 1	Embryo 11cell 1	5	99.855	384.347	191.413	137.57	2155.686	81.001	Non
Lyn-GFP	EcadmCh	Embryo 11	cell 1	Embryo 11cell 1	6	99.855	375.484	173.359	146.96	2422.838	81.001	Non
Lyn-GFP	EcadmCh	Embryo 11	cell 1	Embryo 11cell 1	7	96.829	437.071	177.018	147.699	1952.217	78.542	Non
Lyn-GFP	EcadmCh	Embryo 11	cell 1	Embryo 11cell 1	8	96.829	460.058	188.305	146.249	1598.78	78.542	Non
Lyn-GFP	EcadmCh	Embryo 11	cell 1	Embryo 11cell 1	9	96.181	486.921	210.617	141.977	1727.019	78.015	Non
Lyn-GFP	EcadmCh	Embryo 11	cell 1	Embryo 11cell 1	10	96.181	516.551	242.125	148.53	3417.242	78.015	Non
Lyn-GFP	EcadmCh	Embryo 11	cell 1	Embryo 11cell 1	11	93.803	497.713	252.395	151.765	3290.925	76.083	Non
Lyn-GFP	EcadmCh	Embryo 11	cell 1	Embryo 11cell 1	12	93.803	442.893	165.435	153.531	1309.636	76.083	Non
Lyn-GFP	EcadmCh	Embryo 11	cell 1	Embryo 11cell 1	13	33.069	431.724	155.442	150.299	1192.499	26.708	Non
Lyn-GFP	EcadmCh	Embryo 11		Embryo 11								Non
Lyn-GFP	EcadmCh	Embryo 11	cell 2	Embryo 11cell 2	1	123.846	182.839	33.629	136.362	577.102	100.509	Non
Lyn-GFP	EcadmCh	Embryo 11	cell 2	Embryo 11cell 2	2	123.846	197.11	43.624	136.326	530.887	100.509	Non
Lyn-GFP	EcadmCh	Embryo 11	cell 2	Embryo 11cell 2	3	123.846	226.494	70.492	136.998	634.119	100.509	Non
Lyn-GFP	EcadmCh	Embryo 11	cell 2	Embryo 11cell 2	4	123.846	266.937	115.253	139.949	1076.021	100.509	Non
Lyn-GFP	EcadmCh	Embryo 11	cell 2	Embryo 11cell 2	5	123.846	316.994	160.626	138.154	1244.14	100.509	Non
Lyn-GFP	EcadmCh	Embryo 11	cell 2	Embryo 11cell 2	6	123.846	367.49	200.556	142.413	2309.321	100.509	Non
Lyn-GFP	EcadmCh	Embryo 11	cell 2	Embryo 11cell 2	7	123.846	380.929	184.149	130.022	2247.582	100.509	Non
Lyn-GFP	EcadmCh	Embryo 11	cell 2	Embryo 11cell 2	8	123.846	399.148	175.546	137.615	2238.318	100.509	Non
Lyn-GFP	EcadmCh	Embryo 11	cell 2	Embryo 11cell 2	9	123.846	424.19	184.25	146.066	1806.86	100.509	Non
Lyn-GFP	EcadmCh	Embryo 11	cell 2	Embryo 11cell 2	10	124.927	507.54	205.889	149.84	1714.566	101.386	Non
Lyn-GFP	EcadmCh	Embryo 11	cell 2	Embryo 11cell 2	11	124.927	544.705	216.671	152.106	1842.505	101.386	Non
Lyn-GFP	EcadmCh	Embryo 11	cell 2	Embryo 11cell 2	12	125.359	542.559	200.732	168.166	1604.473	101.738	Non
Lyn-GFP	EcadmCh	Embryo 11	cell 2	Embryo 11cell 2	13	59.87	392.198	157.892	146.566	1365.673	48.498	Non
Lyn-GFP	EcadmCh											Non
Lyn-GFP	EcadmCh											Non
Lyn-GFP	EcadmCh	Embryo 12	cell 1	Embryo 12cell 1	1	117.362	192.516	43.524	137.809	462.017	95.231	Non
Lyn-GFP	EcadmCh	Embryo 12	cell 1	Embryo 12cell 1	2	117.362	240.323	91.5	138.418	878.886	95.231	Non
Lyn-GFP	EcadmCh	Embryo 12	cell 1	Embryo 12cell 1	3	117.362	324.595	198.261	138.945	1931.394	95.231	Non
Lyn-GFP	EcadmCh	Embryo 12	cell 1	Embryo 12cell 1	4	117.362	460.259	312.951	132.456	3044.435	95.231	Non
Lyn-GFP	EcadmCh	Embryo 12	cell 1	Embryo 12cell 1	5	117.362	532.424	306.6	141.694	3289.727	95.231	Non
Lyn-GFP	EcadmCh	Embryo 12	cell 1	Embryo 12cell 1	6	117.578	562.821	297.525	148.322	3518.557	95.407	Non
Lyn-GFP	EcadmCh	Embryo 12	cell 1	Embryo 12cell 1	7	118.227	566.319	296.544	139.041	2911.326	95.938	Non
Lyn-GFP	EcadmCh	Embryo 12	cell 1	Embryo 12cell 1	8	118.227	578.343	264.947	135.106	2213.962	95.938	Non
Lyn-GFP	EcadmCh	Embryo 12	cell 1	Embryo 12cell 1	9	66.138	554.431	252.461	146.101	1761.147	53.592	Non
Lyn-GFP	EcadmCh	Embryo 12	cell 1	Embryo 12cell 1	10	66.138	507.975	199.645	146.692	1437.864	53.592	Non
Lyn-GFP	EcadmCh	Embryo 12	cell 1	Embryo 12cell 1	11	37.392	471.494	215.486	146.427	1328.499	30.223	Non
Lyn-GFP	EcadmCh	Embryo 12	cell 1	Embryo 12cell 1	12	34.15	394.868	157.694	145.835	1208.955	27.587	Non
Lyn-GFP	EcadmCh	Embryo 12		Embryo 12								Non
Lyn-GFP	EcadmCh	Embryo 12	cell 2	Embryo 12cell 2	1	101.152	190.459	37.241	133.257	394.934	82.058	Non
Lyn-GFP	EcadmCh	Embryo 12	cell 2	Embryo 12cell 2	2	101.152	215.729	53.903	137.797	528.434	82.058	Non
Lyn-GFP	EcadmCh	Embryo 12	cell 2	Embryo 12cell 2	3	101.152	293.67	125.561	141.554	1015.83	82.058	Non
Lyn-GFP	EcadmCh	Embryo 12	cell 2	Embryo 12cell 2	4	101.152	451.026	275.783	144.081	2150.773	82.058	Non
Lyn-GFP	EcadmCh	Embryo 12	cell 2	Embryo 12cell 2	5	100.071	601.307	352.037	146.378	2974.231	81.179	Non
Lyn-GFP	EcadmCh	Embryo 12	cell 2	Embryo 12cell 2	6	100.071	614.77	338.363	142.641	3128.279	81.179	Non
Lyn-GFP	EcadmCh	Embryo 12	cell 2	Embryo 12cell 2	7	97.91	687.555	337.074	151.228	2678.882	79.422	Non
Lyn-GFP	EcadmCh	Embryo 12	cell 2	Embryo 12cell 2	8	97.045	752.278	368.562	171.38	2417.368	78.719	Non
Lyn-GFP	EcadmCh	Embryo 12	cell 2	Embryo 12cell 2	9	97.478	776.628	333.708	154.284	2133.842	79.071	Non
Lyn-GFP	EcadmCh	Embryo 12	cell 2	Embryo 12cell 2	10	73.054	744.069	301.576	166.94	2056.541	59.215	Non
Lyn-GFP	EcadmCh	Embryo 12	cell 2	Embryo 12cell 2	11	55.979	700.941	404.576	176.282	4095	45.335	Non
Lyn-GFP	EcadmCh	Embryo 12	cell 2	Embryo 12cell 2	12	35.879	697.582	225.726	208.893	1502.203	28.993	Non
Lyn-GFP	EcadmCh	Embryo 12	cell 2	Embryo 12cell 2	13	29.611	664.047	195.758	228.917	1392.292	23.894	Non
Lyn-GFP	EcadmCh											Non
Lyn-GFP	EcadmCh											Non
Lyn-GFP	EcadmCh	Embryo 13	cell 1	Embryo 13cell 1	1	95.1	196.375	39.4	139.833	421.994	77.134	Non
Lyn-GFP	EcadmCh	Embryo 13	cell 1	Embryo 13cell 1	2	95.1	305	137.08	125.336	1313.462	77.134	Non
Lyn-GFP	EcadmCh	Embryo 13	cell 1	Embryo 13cell 1	3	95.1	460.563	274.024	141.453	2744.212	77.134	Non
Lyn-GFP	EcadmCh	Embryo 13	cell 1	Embryo 13cell 1	4	93.371	513.647	264.412	146.122	2991.879	75.729	Non
Lyn-GFP	EcadmCh	Embryo 13	cell 1	Embryo 13cell 1	5	92.939	530.483	251.882	146.102	1905.157	75.378	Non
Lyn-GFP	EcadmCh	Embryo 13	cell 1	Embryo 13cell 1	6	93.371	586.214	257.335	161.947	2084.45	75.727	Non
Lyn-GFP	EcadmCh	Embryo 13	cell 1	Embryo 13cell 1	7	76.945	557.026	241.112	161.36	2005.85	62.379	Non
Lyn-GFP	EcadmCh	Embryo 13	cell 1	Embryo 13cell 1	8	76.945	531.782	206.425	173.058	1512.08	62.379	Non
Lyn-GFP	EcadmCh	Embryo 13	cell 1	Embryo 13cell 1	9	38.256	506.167	203.84	156.186	1485.117	30.926	Non
Lyn-GFP	EcadmCh	Embryo 13	cell 1	Embryo 13cell 1	10	38.688	442.304	181.147	164.47	1414.062	31.277	Non
Lyn-GFP	EcadmCh	Embryo 13		Embryo 13								Non
Lyn-GFP	EcadmCh	Embryo 13	cell 2	Embryo 13cell 2	1	89.913	203.009	44.213	136.797	442.936	72.92	Non
Lyn-GFP	EcadmCh	Embryo 13	cell 2	Embryo 13cell 2	2	89.913	330.858	156.571	142.324	1406.634	72.92	Non
Lyn-GFP	EcadmCh	Embryo 13	cell 2	Embryo 13cell 2	3	89.913	543.902	350.582	145.001	3311.819	72.92	Non
Lyn-GFP	EcadmCh	Embryo 13	cell 2	Embryo 13cell 2	4	89.913	596.442	346.773	141.18	3306.666	72.92	Non
Lyn-GFP	EcadmCh	Embryo 13	cell 2	Embryo 13cell 2	5	88.616	626.013	300.379	151.013	2986.971	71.865	Non
Lyn-GFP	EcadmCh	Embryo 13	cell 2	Embryo 13cell 2	6	88.184	702.097	314.874	160.475	2662.805	71.512	Non
Lyn-GFP	EcadmCh	Embryo 13	cell 2	Embryo 13cell 2	7	88.616	747.197	296.901	150.406	2214.788	71.859	Non
Lyn-GFP	EcadmCh	Embryo 13	cell 2	Embryo 13cell 2	8	88.616	691.935	241.418	185.367	2075.923	71.859	Non
Lyn-GFP	EcadmCh	Embryo 13	cell 2	Embryo 13cell 2	9	70.677	675.312	222.008	168.848	1740.904	57.283	Non
Lyn-GFP	EcadmCh	Embryo 13	cell 2	Embryo 13cell 2	10	70.677	629.709	190.067	172.728	1413.646	57.283	Non
Lyn-GFP	EcadmCh	Embryo 13		Embryo 13								Non
Lyn-GFP	EcadmCh	Embryo 13	cell 3	Embryo 13cell 3	1	89.048	248.564	80.819	135.643	950.328	72.215	Non
Lyn-GFP	EcadmCh	Embryo 13	cell 3	Embryo 13cell 3	2	89.048	470.51	269.698	145.475	2302.324	72.215	Non
Lyn-GFP	EcadmCh	Embryo 13	cell 3	Embryo 13cell 3	3	89.048	598.004	313.357	148.114	2886.178	72.215	Non
Lyn-GFP	EcadmCh	Embryo 13	cell 3	Embryo 13cell 3	4	89.265	634.789	269.657	151.786	3117.615	72.391	Non
Lyn-GFP	EcadmCh	Embryo 13	cell 3	Embryo 13cell 3	5	93.587	670.893	286.437	167.096	2614.411	75.906	Non
Lyn-GFP	EcadmCh	Embryo 13	cell 3	Embryo 13cell 3	6	93.587	719.39	288.011	165.89	2381.821	75.906	Non
Lyn-GFP	EcadmCh	Embryo 13	cell 3	Embryo 13cell 3	7	92.939	669.043	239.276	178.487	1851.205	75.38	Non
Lyn-GFP	EcadmCh	Embryo 13	cell 3	Embryo 13cell 3	8	81.7	629.347	235.463	179.057	1967.344	66.243	Non
Lyn-GFP	EcadmCh											Non
Lyn-GFP	EcadmCh	Embryo 14	cell 1	Embryo 14cell 1	1	126.224	206.883	52.182	132.815	579.73	102.438	Non
Lyn-GFP	EcadmCh	Embryo 14	cell 1	Embryo 14cell 1	2	126.224	279.373	122.334	137.578	1101.379	102.438	Non
Lyn-GFP	EcadmCh	Embryo 14	cell 1	Embryo 14cell 1	3	126.224	344.584	178.682	142.1	1426.347	102.438	Non
Lyn-GFP	EcadmCh	Embryo 14	cell 1	Embryo 14cell 1	4	126.224	379.593	196.903	143.924	1826.498	102.438	Non
Lyn-GFP	EcadmCh	Embryo 14	cell 1	Embryo 14cell 1	5	126.224	391.551	182.031	138.788	2033.103	102.438	Non
Lyn-GFP	EcadmCh	Embryo 14	cell 1	Embryo 14cell 1	6	131.195	358.735	168.834	145.073	2012.392	106.482	Non
Lyn-GFP	EcadmCh	Embryo 14	cell 1	Embryo 14cell 1	7	131.195	393.657	183.559	143.226	1655.722	106.482	Non
Lyn-GFP	EcadmCh	Embryo 14	cell 1	Embryo 14cell 1	8	129.034	491.321	201.008	141.914	1762.731	104.722	Non
Lyn-GFP	EcadmCh	Embryo 14	cell 1	Embryo 14cell 1	9	128.818	503.31	195.582	148.671	1646.48	104.542	Non
Lyn-GFP	EcadmCh	Embryo 14	cell 1	Embryo 14cell 1	10	128.818	512.689	192.404	163.775	1451.804	104.542	Non
Lyn-GFP	EcadmCh	Embryo 14	cell 1	Embryo 14cell 1	11	64.625	506.971	214.438	151.041	1430.26	52.363	Non
Lyn-GFP	EcadmCh	Embryo 14	cell 1	Embryo 14cell 1	12	41.066	412.07	165.396	156.019	1553.99	33.21	Non
Lyn-GFP	EcadmCh	Embryo 14		Embryo 14								Non
Lyn-GFP	EcadmCh	Embryo 14	cell 2	Embryo 14cell 2	1	127.737	275.042	133.071	137.387	1104.192	103.669	Non
Lyn-GFP	EcadmCh	Embryo 14	cell 2	Embryo 14cell 2	2	127.737	354.895	199.943	132.916	1508.558	103.669	Non
Lyn-GFP	EcadmCh	Embryo 14	cell 2	Embryo 14cell 2	3	128.601	378.345	213.907	137.953	1727.728	104.372	Non
Lyn-GFP	EcadmCh	Embryo 14	cell 2	Embryo 14cell 2	4	132.06	430.563	217.505	141.671	2501.07	107.184	Non
Lyn-GFP	EcadmCh	Embryo 14	cell 2	Embryo 14cell 2	5	132.06	454.311	216.703	146.033	2985.327	107.184	Non
Lyn-GFP	EcadmCh	Embryo 14	cell 2	Embryo 14cell 2	6	138.976	522.178	223.078	148.835	1929.581	112.807	Non
Lyn-GFP	EcadmCh	Embryo 14	cell 2	Embryo 14cell 2	7	138.976	627.035	246.398	152.993	2185.608	112.806	Non
Lyn-GFP	EcadmCh	Embryo 14	cell 2	Embryo 14cell 2	8	120.388	613.277	235.107	166.486	1958.732	97.695	Non
Lyn-GFP	EcadmCh	Embryo 14	cell 2	Embryo 14cell 2	9	107.204	599.47	217.356	174.722	1553.988	86.976	Non
Lyn-GFP	EcadmCh	Embryo 14	cell 2	Embryo 14cell 2	10	107.204	566.715	228.171	160.021	1780.32	86.976	Non
Lyn-GFP	EcadmCh	Embryo 14	cell 2	Embryo 14cell 2	11	14.049	528.82	161.654	187.088	1266.672	11.246	Non
Lyn-GFP	EcadmCh	Embryo 14		Embryo 14								Non
Lyn-GFP	EcadmCh	Embryo 14	cell 3	Embryo 14cell 3	1	107.204	185.005	35.89	128.321	513.536	86.969	Non
Lyn-GFP	EcadmCh	Embryo 14	cell 3	Embryo 14cell 3	2	107.204	215.156	62.522	138.931	642.496	86.969	Non
Lyn-GFP	EcadmCh	Embryo 14	cell 3	Embryo 14cell 3	3	107.204	269.083	122.65	141.218	1294.894	86.969	Non
Lyn-GFP	EcadmCh	Embryo 14	cell 3	Embryo 14cell 3	4	107.204	295.047	144.511	138.994	1292.754	86.969	Non
Lyn-GFP	EcadmCh	Embryo 14	cell 3	Embryo 14cell 3	5	107.204	343.628	170.233	144.083	1496.774	86.969	Non
Lyn-GFP	EcadmCh	Embryo 14	cell 3	Embryo 14cell 3	6	107.204	357.951	166.026	140.554	1692.093	86.969	Non
Lyn-GFP	EcadmCh	Embryo 14	cell 3	Embryo 14cell 3	7	108.068	383.728	177.384	145.821	1937.437	87.677	Non
Lyn-GFP	EcadmCh	Embryo 14	cell 3	Embryo 14cell 3	8	107.852	393.295	153.698	142.253	1510.984	87.504	Non
Lyn-GFP	EcadmCh	Embryo 14	cell 3	Embryo 14cell 3	9	110.446	383.596	159.265	147.253	1528.787	89.614	Non
Lyn-GFP	EcadmCh	Embryo 14	cell 3	Embryo 14cell 3	10	107.42	479.54	164.699	147.032	1465.424	87.151	Non
Lyn-GFP	EcadmCh	Embryo 14	cell 3	Embryo 14cell 3	11	114.12	469.91	158.494	139.792	1469.814	92.595	Non
Lyn-GFP	EcadmCh	Embryo 14	cell 3	Embryo 14cell 3	12	63.544	433.95	143.229	149.121	1197.361	51.484	Non
Lyn-GFP	EcadmCh	Embryo 14	cell 3	Embryo 14cell 3	13	48.847	403.629	142.993	145.031	1308.34	39.536	Non
Lyn-GFP	EcadmCh	Embryo 15	cell 1	Embryo 15cell 1	1	102.233	177.129	32.352	132.747	398.207	82.931	Non
Lyn-GFP	EcadmCh	Embryo 15	cell 1	Embryo 15cell 1	2	102.233	194.374	43.837	134.634	538.297	82.931	Non
Lyn-GFP	EcadmCh	Embryo 15	cell 1	Embryo 15cell 1	3	102.233	214.042	61.359	138.373	593.175	82.931	Non
Lyn-GFP	EcadmCh	Embryo 15	cell 1	Embryo 15cell 1	4	102.233	257.152	99.628	131.699	985.345	82.931	Non
Lyn-GFP	EcadmCh	Embryo 15	cell 1	Embryo 15cell 1	5	102.233	358.6	197.232	140.272	1513.208	82.931	Non
Lyn-GFP	EcadmCh	Embryo 15	cell 1	Embryo 15cell 1	6	103.962	443.875	300.415	139.547	2323.56	84.339	Non
Lyn-GFP	EcadmCh	Embryo 15	cell 1	Embryo 15cell 1	7	103.962	579.842	407.79	137.689	3559.897	84.339	Non
Lyn-GFP	EcadmCh	Embryo 15	cell 1	Embryo 15cell 1	8	103.962	634.352	411.013	139.448	3772.121	84.339	Non
Lyn-GFP	EcadmCh	Embryo 15	cell 1	Embryo 15cell 1	9	103.962	633.473	388.233	134.914	3689.138	84.339	Non
Lyn-GFP	EcadmCh	Embryo 15	cell 1	Embryo 15cell 1	10	104.394	656.974	353.624	147.318	3342.949	84.687	Non
Lyn-GFP	EcadmCh	Embryo 15	cell 1	Embryo 15cell 1	11	104.394	673.497	350.981	141.702	3344.229	84.687	Non
Lyn-GFP	EcadmCh	Embryo 15	cell 1	Embryo 15cell 1	12	104.394	678.844	367.282	145.095	3211.466	84.687	Non
Lyn-GFP	EcadmCh	Embryo 15	cell 1	Embryo 15cell 1	13	103.962	673.266	405.507	138.491	3250.922	84.342	Non
Lyn-GFP	EcadmCh	Embryo 15	cell 1	Embryo 15cell 1	14	103.962	693.027	382.644	142.655	3152.33	84.342	Non
Lyn-GFP	EcadmCh	Embryo 15	cell 1	Embryo 15cell 1	15	103.962	666.222	357.076	142.842	3096.667	84.342	Non
Lyn-GFP	EcadmCh	Embryo 15	cell 1	Embryo 15cell 1	16	89.913	640.022	337.395	149.668	2047.233	72.92	Non
Lyn-GFP	EcadmCh	Embryo 15	cell 1	Embryo 15cell 1	17	85.59	570.688	284.288	143.853	1920.038	69.407	Non
Lyn-GFP	EcadmCh	Embryo 15	cell 1	Embryo 15cell 1	18	81.7	498.962	255.092	141.146	1658.609	66.244	Non
Lyn-GFP	EcadmCh	Embryo 15	cell 1	Embryo 15cell 1	19	25.072	540.533	261.082	143.131	1475.993	20.207	Non
Lyn-GFP	EcadmCh											Non
Lyn-GFP	EcadmCh											Non
Lyn-GFP	EcadmCh											Non
Lyn-GFP	EcadmCh	Embryo 16	cell 1	Embryo 16cell 1	1	109.149	151.723	38.504	102.128	500.79	88.554	Non
Lyn-GFP	EcadmCh	Embryo 16	cell 1	Embryo 16cell 1	2	109.149	166.686	45.484	96.086	544.267	88.554	Non
Lyn-GFP	EcadmCh	Embryo 16	cell 1	Embryo 16cell 1	3	109.149	201.419	69.757	100.51	649.307	88.554	Non
Lyn-GFP	EcadmCh	Embryo 16	cell 1	Embryo 16cell 1	4	109.149	297.588	151.67	101.737	1088.603	88.554	Non
Lyn-GFP	EcadmCh	Embryo 16	cell 1	Embryo 16cell 1	5	109.149	391.579	239.703	103.56	2143.539	88.554	Non
Lyn-GFP	EcadmCh	Embryo 16	cell 1	Embryo 16cell 1	6	109.149	446.564	259.289	109.886	3087.096	88.554	Non
Lyn-GFP	EcadmCh	Embryo 16	cell 1	Embryo 16cell 1	7	109.149	487.632	256.093	99.341	2582.259	88.554	Non
Lyn-GFP	EcadmCh	Embryo 16	cell 1	Embryo 16cell 1	8	110.23	547.238	281.366	116.993	2256.694	89.434	Non
Lyn-GFP	EcadmCh	Embryo 16	cell 1	Embryo 16cell 1	9	109.797	583.856	290.753	112.7	2403.352	89.083	Non
Lyn-GFP	EcadmCh	Embryo 16	cell 1	Embryo 16cell 1	10	107.636	600.772	289.6	123.344	2257.719	87.328	Non
Lyn-GFP	EcadmCh	Embryo 16	cell 1	Embryo 16cell 1	11	49.928	533.209	219.342	144.396	1796.165	40.415	Non
Lyn-GFP	EcadmCh	Embryo 16		Embryo 16								Non
Lyn-GFP	EcadmCh	Embryo 16	cell 2	Embryo 16cell 2	1	119.091	159.869	49.934	98.843	559.624	96.632	Non
Lyn-GFP	EcadmCh	Embryo 16	cell 2	Embryo 16cell 2	2	119.091	198.283	87.968	105.806	1084.265	96.632	Non
Lyn-GFP	EcadmCh	Embryo 16	cell 2	Embryo 16cell 2	3	119.091	249.586	137.952	99.371	2019.046	96.632	Non
Lyn-GFP	EcadmCh	Embryo 16	cell 2	Embryo 16cell 2	4	119.091	284.709	168.363	106.97	2384.915	96.632	Non
Lyn-GFP	EcadmCh	Embryo 16	cell 2	Embryo 16cell 2	5	119.091	319.753	190.552	107.335	2203.752	96.632	Non
Lyn-GFP	EcadmCh	Embryo 16	cell 2	Embryo 16cell 2	6	117.795	371.134	228.206	102.401	2034.465	95.588	Non
Lyn-GFP	EcadmCh	Embryo 16	cell 2	Embryo 16cell 2	7	117.795	412.5	275.249	110.096	2637.693	95.588	Non
Lyn-GFP	EcadmCh	Embryo 16	cell 2	Embryo 16cell 2	8	117.795	452.839	337.174	106.47	3588.74	95.588	Non
Lyn-GFP	EcadmCh											Non
Lyn-GFP	EcadmCh	Embryo 17	cell 1	Embryo 17cell 1	1	94.236	156.331	44.281	103.962	442.732	76.428	Non
Lyn-GFP	EcadmCh	Embryo 17	cell 1	Embryo 17cell 1	2	94.236	173.543	57.455	93.498	505.357	76.428	Non
Lyn-GFP	EcadmCh	Embryo 17	cell 1	Embryo 17cell 1	3	94.236	210.166	94.958	102.788	788.222	76.428	Non
Lyn-GFP	EcadmCh	Embryo 17	cell 1	Embryo 17cell 1	4	94.236	297.44	200.236	105.182	1482.63	76.428	Non
Lyn-GFP	EcadmCh	Embryo 17	cell 1	Embryo 17cell 1	5	94.236	423.399	354.643	104.79	2577.913	76.428	Non
Lyn-GFP	EcadmCh	Embryo 17	cell 1	Embryo 17cell 1	6	94.236	517.464	441.866	103.777	3685.546	76.428	Non
Lyn-GFP	EcadmCh	Embryo 17	cell 1	Embryo 17cell 1	7	94.236	561.263	432.246	108.62	3665.942	76.428	Non
Lyn-GFP	EcadmCh	Embryo 17	cell 1	Embryo 17cell 1	8	94.236	569.022	413.001	108.854	3665.471	76.428	Non
Lyn-GFP	EcadmCh	Embryo 17	cell 1	Embryo 17cell 1	9	94.236	565.774	390.494	109.939	3654.194	76.428	Non
Lyn-GFP	EcadmCh	Embryo 17	cell 1	Embryo 17cell 1	10	94.236	561.836	371.788	110.422	3210.602	76.428	Non
Lyn-GFP	EcadmCh	Embryo 17	cell 1	Embryo 17cell 1	11	92.29	614.273	355.693	110.786	3114.089	74.85	Non
Lyn-GFP	EcadmCh	Embryo 17	cell 1	Embryo 17cell 1	12	92.29	636.284	349.931	117.027	2889.483	74.85	Non
Lyn-GFP	EcadmCh	Embryo 17	cell 1	Embryo 17cell 1	13	92.29	660.539	365.956	122.445	2707.444	74.85	Non
Lyn-GFP	EcadmCh	Embryo 17	cell 1	Embryo 17cell 1	14	93.803	673.207	396.341	114.701	2519.718	76.083	Non
Lyn-GFP	EcadmCh	Embryo 17	cell 1	Embryo 17cell 1	15	93.803	708.156	383.621	116.071	2499.774	76.083	Non
Lyn-GFP	EcadmCh	Embryo 17	cell 1	Embryo 17cell 1	16	94.236	661.52	360.377	108.106	2619.407	76.434	Non
Lyn-GFP	EcadmCh	Embryo 17	cell 1	Embryo 17cell 1	17	94.236	616.284	300.658	111.04	2144.747	76.434	Non
Lyn-GFP	EcadmCh	Embryo 17	cell 1	Embryo 17cell 1	18	64.625	618.546	289.65	108.706	1888.601	52.363	Non
Lyn-GFP	EcadmCh	Embryo 17	cell 1	Embryo 17cell 1	19	10.807	825.45	368.337	128.669	1950.718	8.61	Non
Lyn-GFP	EcadmCh	Embryo 17		Embryo 17								Non
Lyn-GFP	EcadmCh	Embryo 17	cell 2	Embryo 17cell 2	1	105.691	176.939	59.093	100.037	629.605	85.726	Non
Lyn-GFP	EcadmCh	Embryo 17	cell 2	Embryo 17cell 2	2	105.691	209.161	102.756	100.03	940.402	85.726	Non
Lyn-GFP	EcadmCh	Embryo 17	cell 2	Embryo 17cell 2	3	105.691	272.781	192.235	96.123	1531.174	85.726	Non
Lyn-GFP	EcadmCh	Embryo 17	cell 2	Embryo 17cell 2	4	105.691	430.553	412.045	105.409	3492.276	85.726	Non
Lyn-GFP	EcadmCh	Embryo 17	cell 2	Embryo 17cell 2	5	105.691	549.498	508.151	105.639	4013.417	85.726	Non
Lyn-GFP	EcadmCh	Embryo 17	cell 2	Embryo 17cell 2	6	105.691	592.942	481.902	103.706	3823.457	85.726	Non
Lyn-GFP	EcadmCh	Embryo 17	cell 2	Embryo 17cell 2	7	105.691	622.064	443.853	107.016	4024.846	85.726	Non
Lyn-GFP	EcadmCh	Embryo 17	cell 2	Embryo 17cell 2	8	105.691	627.884	419.697	109.046	3576.682	85.726	Non
Lyn-GFP	EcadmCh	Embryo 17	cell 2	Embryo 17cell 2	9	105.691	623.402	395.303	107.408	3649.667	85.726	Non
Lyn-GFP	EcadmCh	Embryo 17	cell 2	Embryo 17cell 2	10	105.259	629.706	413.029	101.706	3922.622	85.393	Non
Lyn-GFP	EcadmCh	Embryo 17	cell 2	Embryo 17cell 2	11	105.259	669.893	389.174	110.007	3256.064	85.393	Non
Lyn-GFP	EcadmCh	Embryo 17	cell 2	Embryo 17cell 2	12	103.53	711.844	396.122	120.475	2813.441	83.985	Non
Lyn-GFP	EcadmCh	Embryo 17	cell 2	Embryo 17cell 2	13	101.8	754.806	434.268	110.783	3347.147	82.579	Non
Lyn-GFP	EcadmCh	Embryo 17	cell 2	Embryo 17cell 2	14	101.8	811.061	467.499	109.213	3284.089	82.579	Non
Lyn-GFP	EcadmCh	Embryo 17	cell 2	Embryo 17cell 2	15	101.8	827.129	495.747	109.689	3055.689	82.579	Non
Lyn-GFP	EcadmCh	Embryo 17	cell 2	Embryo 17cell 2	16	101.152	838.149	525.603	126.392	3185.954	82.051	Non
Lyn-GFP	EcadmCh	Embryo 17	cell 2	Embryo 17cell 2	17	68.515	869.985	539.551	123.722	3192.362	55.525	Non
Lyn-GFP	EcadmCh	Embryo 17	cell 2	Embryo 17cell 2	18	68.515	806.408	463.85	113.631	3221.571	55.525	Non
Lyn-GFP	EcadmCh	Embryo 17	cell 2	Embryo 17cell 2	19	68.515	693.468	368.265	117.277	2711.355	55.525	Non
Lyn-GFP	EcadmCh	Embryo 17	cell 2	Embryo 17cell 2	20	15.994	703.516	304.971	175.439	1932.869	12.827	Non
Lyn-GFP	EcadmCh	Embryo 17		Embryo 17								Non
Lyn-GFP	EcadmCh	Embryo 17	cell 3	Embryo 17cell 3	1	108.068	162.607	46.497	102.854	463.037	87.673	Non
Lyn-GFP	EcadmCh	Embryo 17	cell 3	Embryo 17cell 3	2	108.068	178.509	70.567	101.591	877.969	87.673	Non
Lyn-GFP	EcadmCh	Embryo 17	cell 3	Embryo 17cell 3	3	108.068	212.993	127.442	105.102	1945.043	87.673	Non
Lyn-GFP	EcadmCh	Embryo 17	cell 3	Embryo 17cell 3	4	108.068	290.82	243.358	99.741	2398.81	87.673	Non
Lyn-GFP	EcadmCh	Embryo 17	cell 3	Embryo 17cell 3	5	108.068	404.577	358.504	103.52	3227.525	87.673	Non
Lyn-GFP	EcadmCh	Embryo 17	cell 3	Embryo 17cell 3	6	108.068	514.012	421.311	107.615	3297.229	87.673	Non
Lyn-GFP	EcadmCh	Embryo 17	cell 3	Embryo 17cell 3	7	108.068	647.277	477.483	103.989	3526.517	87.673	Non
Lyn-GFP	EcadmCh	Embryo 17	cell 3	Embryo 17cell 3	8	108.068	679.598	484.21	108.864	3874.088	87.673	Non
Lyn-GFP	EcadmCh	Embryo 17	cell 3	Embryo 17cell 3	9	108.068	667.195	440.255	111.431	3631.968	87.673	Non
Lyn-GFP	EcadmCh	Embryo 17	cell 3	Embryo 17cell 3	10	108.717	687.306	442.086	111.334	3814.044	88.2	Non
Lyn-GFP	EcadmCh	Embryo 17	cell 3	Embryo 17cell 3	11	108.717	732.127	443.507	127.346	3661.345	88.2	Non
Lyn-GFP	EcadmCh	Embryo 17	cell 3	Embryo 17cell 3	12	108.717	773.684	454.133	123.978	3404.791	88.2	Non
Lyn-GFP	EcadmCh	Embryo 17	cell 3	Embryo 17cell 3	13	108.717	803.096	460.666	123.556	3410.033	88.2	Non
Lyn-GFP	EcadmCh	Embryo 17	cell 3	Embryo 17cell 3	14	109.365	892.113	494.978	122.709	3384.782	88.721	Non
Lyn-GFP	EcadmCh	Embryo 17	cell 3	Embryo 17cell 3	15	109.365	852.733	458.12	127.529	3665.621	88.721	Non
Lyn-GFP	EcadmCh	Embryo 17	cell 3	Embryo 17cell 3	16	95.965	794.039	416.136	125.299	3367.079	77.839	Non
Lyn-GFP	EcadmCh	Embryo 17	cell 3	Embryo 17cell 3	17	92.939	792.358	354.002	164.753	2845.473	75.379	Non
Lyn-GFP	EcadmCh	Embryo 17	cell 3	Embryo 17cell 3	18	92.939	747.128	363.073	166.741	2936.207	75.379	Non
Lyn-GFP	EcadmCh	Embryo 17	cell 3	Embryo 17cell 3	19	17.939	897.323	406.624	151.179	2184.51	14.409	Non
Lyn-GFP	EcadmCh											Non
Lyn-GFP	EcadmCh											Non
Lyn-GFP	EcadmCh											Non
Lyn-GFP	EcadmCh	Embryo 18	cell 1	Embryo 18cell 1	1	105.475	144.21	33.523	101.858	334.165	85.569	Non
Lyn-GFP	EcadmCh	Embryo 18	cell 1	Embryo 18cell 1	2	105.475	161.732	48.806	102.579	483.125	85.569	Non
Lyn-GFP	EcadmCh	Embryo 18	cell 1	Embryo 18cell 1	3	105.475	209.673	100.743	102.427	937.615	85.569	Non
Lyn-GFP	EcadmCh	Embryo 18	cell 1	Embryo 18cell 1	4	105.475	285.018	185.168	101.99	1778.372	85.569	Non
Lyn-GFP	EcadmCh	Embryo 18	cell 1	Embryo 18cell 1	5	105.475	353.527	256.135	103.303	2546.707	85.569	Non
Lyn-GFP	EcadmCh	Embryo 18	cell 1	Embryo 18cell 1	6	105.475	381.787	278.561	105.983	2831.43	85.569	Non
Lyn-GFP	EcadmCh	Embryo 18	cell 1	Embryo 18cell 1	7	106.123	401.056	279.364	106.174	2640.573	86.096	Non
Lyn-GFP	EcadmCh	Embryo 18	cell 1	Embryo 18cell 1	8	106.123	408.788	276.788	109.262	2619.058	86.096	Non
Lyn-GFP	EcadmCh	Embryo 18	cell 1	Embryo 18cell 1	9	106.123	424.047	280.601	109.998	2597.245	86.096	Non
Lyn-GFP	EcadmCh	Embryo 18	cell 1	Embryo 18cell 1	10	106.123	426.03	270.653	109.972	2222.904	86.096	Non
Lyn-GFP	EcadmCh	Embryo 18	cell 1	Embryo 18cell 1	11	107.204	412.612	233.254	105.359	2277.635	86.976	Non
Lyn-GFP	EcadmCh	Embryo 18	cell 1	Embryo 18cell 1	12	107.852	423.095	218.128	102.81	1785.083	87.501	Non
Lyn-GFP	EcadmCh	Embryo 18	cell 1	Embryo 18cell 1	13	110.446	433.816	210.106	106.996	1788.551	89.599	Non
Lyn-GFP	EcadmCh	Embryo 18	cell 1	Embryo 18cell 1	14	109.365	408.487	191.413	108.398	1348.301	88.729	Non
Lyn-GFP	EcadmCh	Embryo 18	cell 1	Embryo 18cell 1	15	98.342	404.306	194.198	107.969	1609.793	79.769	Non
Lyn-GFP	EcadmCh	Embryo 18	cell 1	Embryo 18cell 1	16	98.775	402.146	194.573	106.109	2193.093	80.121	Non
Lyn-GFP	EcadmCh	Embryo 18	cell 1	Embryo 18cell 1	17	93.587	386.042	153.15	108.165	1313.61	75.903	Non
Lyn-GFP	EcadmCh	Embryo 18	cell 1	Embryo 18cell 1	18	76.729	344.627	137.533	102.463	1065.833	62.202	Non
Lyn-GFP	EcadmCh	Embryo 18	cell 1	Embryo 18cell 1	19	11.888	441.319	179.664	119.428	1289.692	9.488	Non
Lyn-GFP	EcadmCh	Embryo 18		Embryo 18								Non
Lyn-GFP	EcadmCh	Embryo 18	cell 2	Embryo 18cell 2	1	128.818	149.599	38.996	98.788	445.968	104.549	Non
Lyn-GFP	EcadmCh	Embryo 18	cell 2	Embryo 18cell 2	2	128.818	168.446	56.884	101.873	540.834	104.549	Non
Lyn-GFP	EcadmCh	Embryo 18	cell 2	Embryo 18cell 2	3	128.818	218.838	136.677	104.391	1251.206	104.549	Non
Lyn-GFP	EcadmCh	Embryo 18	cell 2	Embryo 18cell 2	4	128.818	294.91	241.896	105.137	2483.958	104.549	Non
Lyn-GFP	EcadmCh	Embryo 18	cell 2	Embryo 18cell 2	5	128.601	366.427	312.725	101.837	3158.851	104.373	Non
Lyn-GFP	EcadmCh	Embryo 18	cell 2	Embryo 18cell 2	6	128.601	431.718	357.073	104.662	3822.641	104.373	Non
Lyn-GFP	EcadmCh	Embryo 18	cell 2	Embryo 18cell 2	7	128.385	501.445	371.428	103.041	3149.123	104.195	Non
Lyn-GFP	EcadmCh	Embryo 18	cell 2	Embryo 18cell 2	8	128.385	510.014	352.463	109.463	3180.829	104.195	Non
Lyn-GFP	EcadmCh	Embryo 18	cell 2	Embryo 18cell 2	9	129.034	506.561	316.171	111.292	3347.131	104.725	Non
Lyn-GFP	EcadmCh	Embryo 18	cell 2	Embryo 18cell 2	10	129.034	515.564	292.035	111.435	2884.854	104.725	Non
Lyn-GFP	EcadmCh	Embryo 18	cell 2	Embryo 18cell 2	11	96.613	551.015	293.022	108.659	2322.248	78.368	Non
Lyn-GFP	EcadmCh	Embryo 18	cell 2	Embryo 18cell 2	12	94.452	620.947	288.252	136.299	2269.49	76.612	Non
Lyn-GFP	EcadmCh	Embryo 18	cell 2	Embryo 18cell 2	13	97.478	659.121	314.338	131.477	2370.901	79.071	Non
Lyn-GFP	EcadmCh	Embryo 18	cell 2	Embryo 18cell 2	14	99.207	686.282	341.936	0	2601.869	80.476	Non
Lyn-GFP	EcadmCh	Embryo 18	cell 2	Embryo 18cell 2	15	99.207	689.054	340.954	0	2168.798	80.476	Non
Lyn-GFP	EcadmCh	Embryo 18	cell 2	Embryo 18cell 2	16	96.181	640.591	326.03	0	2150.853	78.016	Non
Lyn-GFP	EcadmCh	Embryo 18	cell 2	Embryo 18cell 2	17	93.587	574.101	290.39	0	1753.007	75.908	Non
Lyn-GFP	EcadmCh	Embryo 18	cell 2	Embryo 18cell 2	18	10.375	754.492	272.673	222.204	1528.622	8.259	Non
Lyn-GFP	EcadmCh											Non
Lyn-GFP	EcadmCh											Non
Lyn-GFP	EcadmCh											Non
Lyn-GFP	EcadmCh	Embryo 19	cell 1	Embryo 19cell 1	1	100.72	145.98	32.584	93.432	354.536	81.7	Non
Lyn-GFP	EcadmCh	Embryo 19	cell 1	Embryo 19cell 1	2	100.72	163.192	44.152	102.856	471.467	81.7	Non
Lyn-GFP	EcadmCh	Embryo 19	cell 1	Embryo 19cell 1	3	100.72	183.712	56.623	102.814	494.495	81.7	Non
Lyn-GFP	EcadmCh	Embryo 19	cell 1	Embryo 19cell 1	4	100.72	193.596	65.693	98.332	610.659	81.7	Non
Lyn-GFP	EcadmCh	Embryo 19	cell 1	Embryo 19cell 1	5	100.72	301.976	142.059	105.065	1146.354	81.7	Non
Lyn-GFP	EcadmCh	Embryo 19	cell 1	Embryo 19cell 1	6	100.72	536.065	383.811	105.86	2944.867	81.7	Non
Lyn-GFP	EcadmCh	Embryo 19	cell 1	Embryo 19cell 1	7	100.72	663.781	508.278	109.579	3953.007	81.7	Non
Lyn-GFP	EcadmCh	Embryo 19	cell 1	Embryo 19cell 1	8	100.72	760.188	571.644	109.705	4002.734	81.7	Non
Lyn-GFP	EcadmCh	Embryo 19	cell 1	Embryo 19cell 1	9	100.72	823.966	541.334	111.439	4002.768	81.7	Non
Lyn-GFP	EcadmCh	Embryo 19	cell 1	Embryo 19cell 1	10	100.72	797.767	490.705	121.492	4064.02	81.7	Non
Lyn-GFP	EcadmCh	Embryo 19	cell 1	Embryo 19cell 1	11	102.017	837.099	469.622	127.943	3889.782	82.758	Non
Lyn-GFP	EcadmCh	Embryo 19	cell 1	Embryo 19cell 1	12	102.017	886.756	449.291	146.112	3940.02	82.758	Non
Lyn-GFP	EcadmCh	Embryo 19	cell 1	Embryo 19cell 1	13	102.017	935.002	463.349	126.29	3636.801	82.758	Non
Lyn-GFP	EcadmCh	Embryo 19	cell 1	Embryo 19cell 1	14	102.665	976.229	475.182	161.687	3780.269	83.286	Non
Lyn-GFP	EcadmCh	Embryo 19	cell 1	Embryo 19cell 1	15	102.665	1064.002	431.665	239.974	3338.503	83.282	Non
Lyn-GFP	EcadmCh	Embryo 19	cell 1	Embryo 19cell 1	16	102.665	1051.085	421.861	238.098	3054.774	83.282	Non
Lyn-GFP	EcadmCh	Embryo 19	cell 1	Embryo 19cell 1	17	92.723	1077.66	446.804	204.125	3767.682	75.204	Non
Lyn-GFP	EcadmCh	Embryo 19	cell 1	Embryo 19cell 1	18	57.709	1102.406	416.081	279.799	3131.988	46.738	Non
Lyn-GFP	EcadmCh	Embryo 19	cell 1	Embryo 19cell 1	19	29.827	961.07	382.908	268.931	2973.772	24.073	Non
Lyn-GFP	EcadmCh	Embryo 19	cell 1	Embryo 19cell 1	20	21.398	982.633	342.057	297.436	2283.491	17.22	Non
Lyn-GFP	EcadmCh	Embryo 19		Embryo 19								Non
Lyn-GFP	EcadmCh	Embryo 19	cell 2	Embryo 19cell 2	1	94.668	149.924	37.722	104.286	466.167	76.785	Non
Lyn-GFP	EcadmCh	Embryo 19	cell 2	Embryo 19cell 2	2	94.668	170.149	51.392	105.659	501.522	76.785	Non
Lyn-GFP	EcadmCh	Embryo 19	cell 2	Embryo 19cell 2	3	94.668	189.022	67.907	101.921	661.483	76.785	Non
Lyn-GFP	EcadmCh	Embryo 19	cell 2	Embryo 19cell 2	4	94.668	202.062	76.451	91.456	649.272	76.785	Non
Lyn-GFP	EcadmCh	Embryo 19	cell 2	Embryo 19cell 2	5	94.668	313.622	164.448	108.266	1430.895	76.785	Non
Lyn-GFP	EcadmCh	Embryo 19	cell 2	Embryo 19cell 2	6	94.668	566.555	433.159	106.196	3696.295	76.785	Non
Lyn-GFP	EcadmCh	Embryo 19	cell 2	Embryo 19cell 2	7	94.668	683.755	538.254	110.263	3737.76	76.785	Non
Lyn-GFP	EcadmCh	Embryo 19	cell 2	Embryo 19cell 2	8	94.668	753.799	588.983	109.801	3993.485	76.785	Non
Lyn-GFP	EcadmCh	Embryo 19	cell 2	Embryo 19cell 2	9	94.668	855.793	583.83	113.711	4049.673	76.786	Non
Lyn-GFP	EcadmCh	Embryo 19	cell 2	Embryo 19cell 2	10	94.668	849.55	529.677	121.289	3988.046	76.786	Non
Lyn-GFP	EcadmCh	Embryo 19	cell 2	Embryo 19cell 2	11	95.1	857.786	519.254	112.213	3906.577	77.137	Non
Lyn-GFP	EcadmCh	Embryo 19	cell 2	Embryo 19cell 2	12	94.668	870.174	529.669	125.612	4007.599	76.786	Non
Lyn-GFP	EcadmCh	Embryo 19	cell 2	Embryo 19cell 2	13	94.02	960.949	485.42	165.783	3727.082	76.259	Non
Lyn-GFP	EcadmCh	Embryo 19	cell 2	Embryo 19cell 2	14	96.613	959.283	544.861	170.134	3880.511	78.368	Non
Lyn-GFP	EcadmCh	Embryo 19	cell 2	Embryo 19cell 2	15	95.749	1081.321	505.68	198.371	3220.139	77.664	Non
Lyn-GFP	EcadmCh	Embryo 19	cell 2	Embryo 19cell 2	16	95.749	1026.823	502.247	198.885	3399.869	77.664	Non
Lyn-GFP	EcadmCh	Embryo 19	cell 2	Embryo 19cell 2	17	92.723	1077.516	490.397	185.707	3557.195	75.205	Non
Lyn-GFP	EcadmCh	Embryo 19	cell 2	Embryo 19cell 2	18	92.074	1009.86	479.99	147.742	3321.807	74.677	Non
Lyn-GFP	EcadmCh	Embryo 19	cell 2	Embryo 19cell 2	19	89.481	1016.375	441.831	259.597	2939.819	72.567	Non
Lyn-GFP	EcadmCh	Embryo 19	cell 2	Embryo 19cell 2	20	87.968	962.608	388.522	263.738	3196.15	71.337	Non
Lyn-GFP	EcadmCh	Embryo 19	cell 2	Embryo 19cell 2	21	5.403	1524.601	692.158	445.564	3564.721	4.217	Non
Lyn-GFP	EcadmCh	Embryo 19		Embryo 19								Non
Lyn-GFP	EcadmCh	Embryo 19	cell 3	Embryo 19cell 3	1	110.662	144.529	36.863	101.598	572.098	89.783	Non
Lyn-GFP	EcadmCh	Embryo 19	cell 3	Embryo 19cell 3	2	110.662	163.439	58.121	94.739	595.057	89.783	Non
Lyn-GFP	EcadmCh	Embryo 19	cell 3	Embryo 19cell 3	3	110.662	181.511	80.493	99.817	923.706	89.783	Non
Lyn-GFP	EcadmCh	Embryo 19	cell 3	Embryo 19cell 3	4	110.662	201.637	110.413	105.874	1283.851	89.783	Non
Lyn-GFP	EcadmCh	Embryo 19	cell 3	Embryo 19cell 3	5	110.662	306.263	221.09	104.293	2018.388	89.783	Non
Lyn-GFP	EcadmCh	Embryo 19	cell 3	Embryo 19cell 3	6	110.662	456.579	347.432	110.635	3110.36	89.783	Non
Lyn-GFP	EcadmCh	Embryo 19	cell 3	Embryo 19cell 3	7	110.662	519.919	379.321	109.47	3201.399	89.783	Non
Lyn-GFP	EcadmCh	Embryo 19	cell 3	Embryo 19cell 3	8	110.662	588.227	424.032	111.646	3760.442	89.783	Non
Lyn-GFP	EcadmCh	Embryo 19	cell 3	Embryo 19cell 3	9	110.662	655.094	454.117	107.111	3882.522	89.783	Non
Lyn-GFP	EcadmCh	Embryo 19	cell 3	Embryo 19cell 3	10	110.662	665.747	420.838	110.834	3824.023	89.783	Non
Lyn-GFP	EcadmCh	Embryo 19	cell 3	Embryo 19cell 3	11	110.662	656.469	395.225	111.919	3509.899	89.783	Non
Lyn-GFP	EcadmCh	Embryo 19	cell 3	Embryo 19cell 3	12	110.23	677.078	396.203	122.461	4014.956	89.426	Non
Lyn-GFP	EcadmCh	Embryo 19	cell 3	Embryo 19cell 3	13	111.31	752.039	391.584	117.882	3685.201	90.314	Non
Lyn-GFP	EcadmCh	Embryo 19	cell 3	Embryo 19cell 3	14	113.472	792.571	401.688	115.685	3639.434	92.064	Non
Lyn-GFP	EcadmCh	Embryo 19	cell 3	Embryo 19cell 3	15	113.04	810.004	386.185	164.988	3541.245	91.719	Non
Lyn-GFP	EcadmCh	Embryo 19	cell 3	Embryo 19cell 3	16	113.04	845.762	413.752	159.886	3869.932	91.718	Non
Lyn-GFP	EcadmCh	Embryo 19	cell 3	Embryo 19cell 3	17	113.904	861.808	395.004	130.482	3216.422	92.422	Non
Lyn-GFP	EcadmCh	Embryo 19	cell 3	Embryo 19cell 3	18	104.61	855.761	385.864	137.534	2933.817	84.864	Non
Lyn-GFP	EcadmCh											Non
Lyn-GFP	EcadmCh											Non
Lyn-GFP	EcadmCh											Non
Lyn-GFP	EcadmCh	Embryo 20	cell 1	Embryo 20cell 1	1	103.746	161.806	42.154	101.37	430.929	84.164	Non
Lyn-GFP	EcadmCh	Embryo 20	cell 1	Embryo 20cell 1	2	103.746	185.567	59.488	95.208	597.289	84.164	Non
Lyn-GFP	EcadmCh	Embryo 20	cell 1	Embryo 20cell 1	3	103.746	216.4	80.734	102.271	965.499	84.164	Non
Lyn-GFP	EcadmCh	Embryo 20	cell 1	Embryo 20cell 1	4	103.746	337.053	187.187	102.783	2152.061	84.164	Non
Lyn-GFP	EcadmCh	Embryo 20	cell 1	Embryo 20cell 1	5	103.746	447.682	295.476	107.828	3104.47	84.164	Non
Lyn-GFP	EcadmCh	Embryo 20	cell 1	Embryo 20cell 1	6	103.313	567.593	307.666	107.682	3620.391	83.813	Non
Lyn-GFP	EcadmCh	Embryo 20	cell 1	Embryo 20cell 1	7	103.313	579.908	304.883	122.672	3456.974	83.813	Non
Lyn-GFP	EcadmCh	Embryo 20	cell 1	Embryo 20cell 1	8	102.881	593.18	303.745	122.613	2902.887	83.461	Non
Lyn-GFP	EcadmCh	Embryo 20	cell 1	Embryo 20cell 1	9	101.8	645.746	311.782	138.124	2806.08	82.584	Non
Lyn-GFP	EcadmCh	Embryo 20	cell 1	Embryo 20cell 1	10	101.8	682.542	316.796	159.307	2417.236	82.584	Non
Lyn-GFP	EcadmCh	Embryo 20	cell 1	Embryo 20cell 1	11	101.8	637.742	274.477	150.194	2116.151	82.584	Non
Lyn-GFP	EcadmCh	Embryo 20		Embryo 20								Non
Lyn-GFP	EcadmCh	Embryo 20	cell 2	Embryo 20cell 2	1	111.527	182.895	54.92	108.266	664.222	90.48	Non
Lyn-GFP	EcadmCh	Embryo 20	cell 2	Embryo 20cell 2	2	111.527	227.446	83.326	102.118	844.069	90.48	Non
Lyn-GFP	EcadmCh	Embryo 20	cell 2	Embryo 20cell 2	3	111.527	270.98	113.967	106.122	983.819	90.48	Non
Lyn-GFP	EcadmCh	Embryo 20	cell 2	Embryo 20cell 2	4	111.527	471.441	318.201	105.42	3090.097	90.48	Non
Lyn-GFP	EcadmCh	Embryo 20	cell 2	Embryo 20cell 2	5	111.527	619.984	455.006	110.862	3721.019	90.48	Non
Lyn-GFP	EcadmCh	Embryo 20	cell 2	Embryo 20cell 2	6	111.527	703.297	412.969	114.79	4095	90.48	Non
Lyn-GFP	EcadmCh	Embryo 20	cell 2	Embryo 20cell 2	7	111.527	739.645	428.988	127.128	4075.316	90.489	Non
Lyn-GFP	EcadmCh	Embryo 20	cell 2	Embryo 20cell 2	8	111.527	756.38	435.647	136.573	4094.415	90.489	Non
Lyn-GFP	EcadmCh	Embryo 20	cell 2	Embryo 20cell 2	9	111.959	802.025	437.694	114.639	3953.512	90.843	Non
Lyn-GFP	EcadmCh	Embryo 20	cell 2	Embryo 20cell 2	10	112.175	889.844	459.433	154.74	3998.229	91.019	Non
Lyn-GFP	EcadmCh	Embryo 20	cell 2	Embryo 20cell 2	11	112.607	924.254	448.299	139.064	3565.445	91.369	Non
Lyn-GFP	EcadmCh	Embryo 20	cell 2	Embryo 20cell 2	12	33.501	913.767	377.231	247.098	2440.168	27.06	Non
Lyn-GFP	EcadmCh											Non
Lyn-GFP	EcadmCh											Non
Lyn-GFP	EcadmCh											Non
Lyn-GFP	EcadmCh	Embryo 21	cell 1	Embryo 21cell 1	1	122.117	188.567	61.547	97.59	620.94	99.096	Non
Lyn-GFP	EcadmCh	Embryo 21	cell 1	Embryo 21cell 1	2	122.117	213.467	86.28	102.371	942.292	99.096	Non
Lyn-GFP	EcadmCh	Embryo 21	cell 1	Embryo 21cell 1	3	122.117	250.333	127.125	102.977	1263.264	99.096	Non
Lyn-GFP	EcadmCh	Embryo 21	cell 1	Embryo 21cell 1	4	122.117	397.914	302.829	105.205	2269.256	99.096	Non
Lyn-GFP	EcadmCh	Embryo 21	cell 1	Embryo 21cell 1	5	122.117	505.374	413.669	103.856	2837.254	99.096	Non
Lyn-GFP	EcadmCh	Embryo 21	cell 1	Embryo 21cell 1	6	122.766	703.216	525.743	108.598	3626.426	99.622	Non
Lyn-GFP	EcadmCh	Embryo 21	cell 1	Embryo 21cell 1	7	122.766	733.601	494.006	110.583	3915.543	99.622	Non
Lyn-GFP	EcadmCh	Embryo 21	cell 1	Embryo 21cell 1	8	122.766	725.204	471.008	105.985	4017.33	99.622	Non
Lyn-GFP	EcadmCh	Embryo 21	cell 1	Embryo 21cell 1	9	122.766	727.665	427.308	125.651	3981.736	99.622	Non
Lyn-GFP	EcadmCh	Embryo 21	cell 1	Embryo 21cell 1	10	122.766	733.299	415.405	118.671	3638.485	99.622	Non
Lyn-GFP	EcadmCh	Embryo 21	cell 1	Embryo 21cell 1	11	122.766	771.651	414.016	110.988	3893.723	99.622	Non
Lyn-GFP	EcadmCh	Embryo 21	cell 1	Embryo 21cell 1	12	121.253	825.668	413.844	117.615	3267.46	98.395	Non
Lyn-GFP	EcadmCh	Embryo 21	cell 1	Embryo 21cell 1	13	117.578	839.417	412.179	134.22	2593.1	95.411	Non
Lyn-GFP	EcadmCh	Embryo 21	cell 1	Embryo 21cell 1	14	100.72	863.89	408.163	164.671	2488.949	81.7	Non
Lyn-GFP	EcadmCh	Embryo 21	cell 1	Embryo 21cell 1	15	100.72	843.803	402.34	129.649	2791.132	81.7	Non
Lyn-GFP	EcadmCh	Embryo 21	cell 1	Embryo 21cell 1	16	29.611	837.418	353.465	193.737	2195.338	23.897	Non
Lyn-GFP	EcadmCh	Embryo 21		Embryo 21								Non
Lyn-GFP	EcadmCh	Embryo 21	cell 2	Embryo 21cell 2	1	101.368	163.227	48.071	102.443	592.169	82.219	Non
Lyn-GFP	EcadmCh	Embryo 21	cell 2	Embryo 21cell 2	2	101.368	194.735	77.183	98.433	841.159	82.219	Non
Lyn-GFP	EcadmCh	Embryo 21	cell 2	Embryo 21cell 2	3	101.368	235.775	125.075	97.434	1412.102	82.219	Non
Lyn-GFP	EcadmCh	Embryo 21	cell 2	Embryo 21cell 2	4	101.368	338.427	267.356	104.243	2661.126	82.219	Non
Lyn-GFP	EcadmCh	Embryo 21	cell 2	Embryo 21cell 2	5	101.368	472.54	415.349	101.634	3890.31	82.219	Non
Lyn-GFP	EcadmCh	Embryo 21	cell 2	Embryo 21cell 2	6	101.368	520.537	437.983	104.548	3582.635	82.219	Non
Lyn-GFP	EcadmCh	Embryo 21	cell 2	Embryo 21cell 2	7	108.717	600.259	464.84	109.462	3781.881	88.203	Non
Lyn-GFP	EcadmCh	Embryo 21	cell 2	Embryo 21cell 2	8	108.717	684.302	482.411	113.301	3954.44	88.203	Non
Lyn-GFP	EcadmCh	Embryo 21	cell 2	Embryo 21cell 2	9	108.717	712.247	449.192	99.741	3984.52	88.203	Non
Lyn-GFP	EcadmCh	Embryo 21	cell 2	Embryo 21cell 2	10	108.717	729.639	437.865	115.685	3907.396	88.203	Non
Lyn-GFP	EcadmCh	Embryo 21	cell 2	Embryo 21cell 2	11	108.933	796.772	450.123	119.85	3687.907	88.383	Non
Lyn-GFP	EcadmCh	Embryo 21	cell 2	Embryo 21cell 2	12	108.933	841.097	467.42	141.285	3514.248	88.383	Non
Lyn-GFP	EcadmCh	Embryo 21	cell 2	Embryo 21cell 2	13	93.803	873.552	498.39	143.384	3606.388	76.083	Non
Lyn-GFP	EcadmCh	Embryo 21	cell 2	Embryo 21cell 2	14	95.1	884.852	480.866	122.24	3240.245	77.136	Non
Lyn-GFP	EcadmCh	Embryo 21	cell 2	Embryo 21cell 2	15	94.452	842.977	434.686	130.932	3194.894	76.611	Non
Lyn-GFP	EcadmCh	Embryo 21	cell 2	Embryo 21cell 2	16	87.103	764.668	363.734	119.791	2470.144	70.636	Non
Lyn-GFP	EcadmCh	Embryo 21	cell 2	Embryo 21cell 2	17	87.103	742.037	359.878	121.48	2481.853	70.636	Non
Lyn-GFP	EcadmCh	Embryo 21	cell 2	Embryo 21cell 2	18	31.124	929.542	349.271	246.477	2181.625	25.127	Non
Lyn-GFP	EcadmCh											Non
Lyn-GFP	EcadmCh											Non
Lyn-GFP	EcadmCh											Non
Lyn-GFP	EcadmCh	Embryo 22	cell 1	Embryo 22cell 1	1	117.795	174.587	53.251	95.859	473.165	95.586	Non
Lyn-GFP	EcadmCh	Embryo 22	cell 1	Embryo 22cell 1	2	117.795	232.967	107.245	104.868	897.638	95.586	Non
Lyn-GFP	EcadmCh	Embryo 22	cell 1	Embryo 22cell 1	3	117.795	325.455	210.467	108.669	1647.529	95.586	Non
Lyn-GFP	EcadmCh	Embryo 22	cell 1	Embryo 22cell 1	4	117.795	443.064	335.735	104.201	2152.021	95.586	Non
Lyn-GFP	EcadmCh	Embryo 22	cell 1	Embryo 22cell 1	5	117.795	561.804	425.643	106.282	3619.819	95.586	Non
Lyn-GFP	EcadmCh	Embryo 22	cell 1	Embryo 22cell 1	6	117.795	614.954	438.81	105.131	3736.145	95.586	Non
Lyn-GFP	EcadmCh	Embryo 22	cell 1	Embryo 22cell 1	7	119.091	625.576	418.418	105.99	3542.877	96.641	Non
Lyn-GFP	EcadmCh	Embryo 22	cell 1	Embryo 22cell 1	8	119.091	641.641	397.915	113.14	3724.416	96.641	Non
Lyn-GFP	EcadmCh	Embryo 22	cell 1	Embryo 22cell 1	9	119.091	675.424	391.987	114.787	3657.01	96.641	Non
Lyn-GFP	EcadmCh	Embryo 22	cell 1	Embryo 22cell 1	10	119.091	711.993	407.826	112.767	3511.854	96.641	Non
Lyn-GFP	EcadmCh	Embryo 22	cell 1	Embryo 22cell 1	11	119.091	737.534	401.671	118.247	2935.746	96.641	Non
Lyn-GFP	EcadmCh	Embryo 22	cell 1	Embryo 22cell 1	12	119.091	792.36	416.965	123.629	2683.738	96.641	Non
Lyn-GFP	EcadmCh	Embryo 22	cell 1	Embryo 22cell 1	13	119.091	841.453	449.972	116.87	3299.917	96.641	Non
Lyn-GFP	EcadmCh	Embryo 22	cell 1	Embryo 22cell 1	14	109.797	800.585	404.917	114.983	2825.139	89.086	Non
Lyn-GFP	EcadmCh	Embryo 22	cell 1	Embryo 22cell 1	15	109.797	781.951	371.285	118.213	2486.229	89.086	Non
Lyn-GFP	EcadmCh	Embryo 22	cell 1	Embryo 22cell 1	16	97.694	788.961	333.979	166.119	2965.1	79.245	Non
Lyn-GFP	EcadmCh	Embryo 22	cell 1	Embryo 22cell 1	17	29.611	752.117	319.712	202.91	1974.331	23.893	Non
Lyn-GFP	EcadmCh											Non
Lyn-GFP	EcadmCh											Non
Lyn-GFP	EcadmCh											Non
Lyn-GFP	EcadmCh	Embryo 23	cell 1	Embryo 23cell 1	1	112.175	158.63	45.701	97.699	491.87	91.014	Non
Lyn-GFP	EcadmCh	Embryo 23	cell 1	Embryo 23cell 1	2	112.175	176.872	64.587	104.183	679.439	91.014	Non
Lyn-GFP	EcadmCh	Embryo 23	cell 1	Embryo 23cell 1	3	112.175	235.592	141.068	100.607	1150.441	91.014	Non
Lyn-GFP	EcadmCh	Embryo 23	cell 1	Embryo 23cell 1	4	112.175	307.573	237.99	105.023	2089.502	91.014	Non
Lyn-GFP	EcadmCh	Embryo 23	cell 1	Embryo 23cell 1	5	112.391	366.961	313.112	102.879	2446.492	91.19	Non
Lyn-GFP	EcadmCh	Embryo 23	cell 1	Embryo 23cell 1	6	112.391	442.541	357.156	105.67	3354.194	91.19	Non
Lyn-GFP	EcadmCh	Embryo 23	cell 1	Embryo 23cell 1	7	112.391	456.87	324.03	103.183	3037.233	91.19	Non
Lyn-GFP	EcadmCh	Embryo 23	cell 1	Embryo 23cell 1	8	112.391	453.52	277.718	110.593	2739.117	91.19	Non
Lyn-GFP	EcadmCh	Embryo 23	cell 1	Embryo 23cell 1	9	110.878	500.383	272.259	112.818	2787.233	89.964	Non
Lyn-GFP	EcadmCh	Embryo 23	cell 1	Embryo 23cell 1	10	110.878	513.854	262.695	103.666	2228.497	89.964	Non
Lyn-GFP	EcadmCh	Embryo 23	cell 1	Embryo 23cell 1	11	111.959	495.736	268.708	112.435	2832.322	90.844	Non
Lyn-GFP	EcadmCh	Embryo 23	cell 1	Embryo 23cell 1	12	113.256	559.246	268.585	111	2318.628	91.897	Non
Lyn-GFP	EcadmCh	Embryo 23	cell 1	Embryo 23cell 1	13	113.256	628.59	288.577	111.326	2320.96	91.897	Non
Lyn-GFP	EcadmCh	Embryo 23	cell 1	Embryo 23cell 1	14	113.256	673.45	302.907	111.106	2163.802	91.897	Non
Lyn-GFP	EcadmCh	Embryo 23	cell 1	Embryo 23cell 1	15	86.671	687.661	315.435	121.039	2132.971	70.284	Non
Lyn-GFP	EcadmCh	Embryo 23		Embryo 23								Non
Lyn-GFP	EcadmCh	Embryo 23	cell 2	Embryo 23cell 2	1	101.152	233.106	144.871	101.362	1195.257	82.051	Non
Lyn-GFP	EcadmCh	Embryo 23	cell 2	Embryo 23cell 2	2	101.152	299.733	233.672	103.229	1940.939	82.051	Non
Lyn-GFP	EcadmCh	Embryo 23	cell 2	Embryo 23cell 2	3	101.152	404.403	335.519	105.235	3405.221	82.051	Non
Lyn-GFP	EcadmCh	Embryo 23	cell 2	Embryo 23cell 2	4	101.152	458.097	366.385	101.4	3704.203	82.051	Non
Lyn-GFP	EcadmCh	Embryo 23	cell 2	Embryo 23cell 2	5	101.152	475.572	341.754	103.345	3001.961	82.051	Non
Lyn-GFP	EcadmCh	Embryo 23	cell 2	Embryo 23cell 2	6	101.152	476.025	316.976	109.015	3231.516	82.051	Non
Lyn-GFP	EcadmCh	Embryo 23	cell 2	Embryo 23cell 2	7	101.152	480.13	292.308	106.749	3008.302	82.051	Non
Lyn-GFP	EcadmCh	Embryo 23	cell 2	Embryo 23cell 2	8	101.152	481.497	284.611	105.866	2897.563	82.051	Non
Lyn-GFP	EcadmCh	Embryo 23	cell 2	Embryo 23cell 2	9	99.423	497.434	264.331	108.859	2499.248	80.65	Non
Lyn-GFP	EcadmCh	Embryo 23	cell 2	Embryo 23cell 2	10	99.423	511.767	261.749	109.394	1793.101	80.65	Non
Lyn-GFP	EcadmCh	Embryo 23	cell 2	Embryo 23cell 2	11	98.558	540.276	276.065	111.09	1855.67	79.946	Non
Lyn-GFP	EcadmCh	Embryo 23	cell 2	Embryo 23cell 2	12	98.558	568.724	300.941	114.769	1993.525	79.946	Non
Lyn-GFP	EcadmCh	Embryo 23	cell 2	Embryo 23cell 2	13	97.262	640.49	298.451	114.388	2014.925	78.892	Non
Lyn-GFP	EcadmCh	Embryo 23	cell 2	Embryo 23cell 2	14	97.262	658.521	291.291	115.04	2067.994	78.892	Non
Lyn-GFP	EcadmCh	Embryo 23	cell 2	Embryo 23cell 2	15	97.262	647.64	267.816	123.963	1786.902	78.892	Non
Lyn-GFP	EcadmCh	Embryo 23	cell 2	Embryo 23cell 2	16	97.262	585.302	215.605	119.398	1895.787	78.892	Non
Lyn-GFP	EcadmCh	Embryo 23	cell 2	Embryo 23cell 2	17	28.314	567.606	216.597	170.747	1524.618	22.843	Non
Lyn-GFP	EcadmCh											Non
Lyn-GFP	EcadmCh											Non
Lyn-GFP	EcadmCh											Non
Lyn-GFP	EcadmCh	Embryo 24	cell 1	Embryo 24cell 1	1	133.573	161.324	48.119	100.83	534.453	108.406	Non
Lyn-GFP	EcadmCh	Embryo 24	cell 1	Embryo 24cell 1	2	133.573	195.334	87.969	104.021	762.052	108.406	Non
Lyn-GFP	EcadmCh	Embryo 24	cell 1	Embryo 24cell 1	3	133.573	195.334	87.969	104.021	762.052	108.406	Non
Lyn-GFP	EcadmCh	Embryo 24	cell 1	Embryo 24cell 1	4	133.573	210.318	104.63	99.318	982.008	108.406	Non
Lyn-GFP	EcadmCh	Embryo 24	cell 1	Embryo 24cell 1	5	133.573	255.234	162.747	104.62	1263.588	108.406	Non
Lyn-GFP	EcadmCh	Embryo 24	cell 1	Embryo 24cell 1	6	133.573	317.741	233.622	98.055	1717.14	108.406	Non
Lyn-GFP	EcadmCh	Embryo 24	cell 1	Embryo 24cell 1	7	133.573	400.833	297.788	105.958	2612.823	108.406	Non
Lyn-GFP	EcadmCh	Embryo 24	cell 1	Embryo 24cell 1	8	133.573	444.731	325.758	107.413	3340.17	108.406	Non
Lyn-GFP	EcadmCh	Embryo 24	cell 1	Embryo 24cell 1	9	133.573	448.755	316.413	105.095	3404.627	108.406	Non
Lyn-GFP	EcadmCh	Embryo 24	cell 1	Embryo 24cell 1	10	133.573	433.557	272.545	106.741	3506.462	108.406	Non
Lyn-GFP	EcadmCh	Embryo 24	cell 1	Embryo 24cell 1	11	130.547	447.975	250.134	107.434	2609.371	105.954	Non
Lyn-GFP	EcadmCh	Embryo 24	cell 1	Embryo 24cell 1	12	130.547	437.751	227.519	110.068	2258.616	105.954	Non
Lyn-GFP	EcadmCh	Embryo 24	cell 1	Embryo 24cell 1	13	129.25	417.546	217.105	102.048	1818.684	104.9	Non
Lyn-GFP	EcadmCh	Embryo 24	cell 1	Embryo 24cell 1	14	129.898	447.653	189.038	107.856	1482.547	105.426	Non
Lyn-GFP	EcadmCh	Embryo 24	cell 1	Embryo 24cell 1	15	130.547	441.592	181.892	111.683	1841.626	105.955	Non
Lyn-GFP	EcadmCh	Embryo 24	cell 1	Embryo 24cell 1	16	133.14	445.852	180.132	114.637	1692.989	108.062	Non
Lyn-GFP	EcadmCh	Embryo 24	cell 1	Embryo 24cell 1	17	109.365	405.635	198.072	106.184	1613.118	88.735	Non
Lyn-GFP	EcadmCh	Embryo 24	cell 1	Embryo 24cell 1	18	34.582	402.391	162.688	115.092	1460.656	27.938	Non
Lyn-GFP	EcadmCh											Non
Lyn-GFP	EcadmCh											Non
Lyn-GFP	EcadmCh											Non
Lyn-GFP	EcadmCh	Embryo 25	cell 1	Embryo 25cell 1	1	106.123	171.731	50.181	103.524	492.585	86.094	Non
Lyn-GFP	EcadmCh	Embryo 25	cell 1	Embryo 25cell 1	2	106.123	191.84	64.627	106.38	573.39	86.094	Non
Lyn-GFP	EcadmCh	Embryo 25	cell 1	Embryo 25cell 1	3	106.123	242.237	105.857	109.121	833.318	86.094	Non
Lyn-GFP	EcadmCh	Embryo 25	cell 1	Embryo 25cell 1	4	106.123	390.486	253.244	101.265	2148.418	86.094	Non
Lyn-GFP	EcadmCh	Embryo 25	cell 1	Embryo 25cell 1	5	106.123	556.089	411.878	111.343	2991.107	86.094	Non
Lyn-GFP	EcadmCh	Embryo 25	cell 1	Embryo 25cell 1	6	106.123	575.516	431.459	107.85	3435.83	86.091	Non
Lyn-GFP	EcadmCh	Embryo 25	cell 1	Embryo 25cell 1	7	106.123	577.701	418.998	106.781	3665.258	86.091	Non
Lyn-GFP	EcadmCh	Embryo 25	cell 1	Embryo 25cell 1	8	106.123	692.463	498.912	114.285	4001.883	86.091	Non
Lyn-GFP	EcadmCh	Embryo 25	cell 1	Embryo 25cell 1	9	105.907	735.879	474.813	110.515	3922.591	85.918	Non
Lyn-GFP	EcadmCh	Embryo 25	cell 1	Embryo 25cell 1	10	105.907	767.938	455.196	111.565	4068.518	85.918	Non
Lyn-GFP	EcadmCh	Embryo 25	cell 1	Embryo 25cell 1	11	104.394	836.071	473.292	112.86	3909.399	84.686	Non
Lyn-GFP	EcadmCh	Embryo 25	cell 1	Embryo 25cell 1	12	104.394	848.926	483.951	125.861	3901.323	84.686	Non
Lyn-GFP	EcadmCh	Embryo 25	cell 1	Embryo 25cell 1	13	97.262	886.512	454.081	130.961	3725.456	78.889	Non
Lyn-GFP	EcadmCh	Embryo 25	cell 1	Embryo 25cell 1	14	97.262	834.694	428.548	130.43	3230.293	78.889	Non
Lyn-GFP	EcadmCh	Embryo 25	cell 1	Embryo 25cell 1	15	44.74	908.325	405.555	161.343	2770.45	36.196	Non
Lyn-GFP	EcadmCh	Embryo 25		Embryo 25								Non
Lyn-GFP	EcadmCh	Embryo 25	cell 2	Embryo 25cell 2	1	100.287	162.383	51.368	97.69	563.29	81.351	Non
Lyn-GFP	EcadmCh	Embryo 25	cell 2	Embryo 25cell 2	2	100.287	207.714	99.825	95.301	1054.79	81.351	Non
Lyn-GFP	EcadmCh	Embryo 25	cell 2	Embryo 25cell 2	3	100.287	290.907	214.27	106.376	2282.033	81.351	Non
Lyn-GFP	EcadmCh	Embryo 25	cell 2	Embryo 25cell 2	4	100.287	307.192	222.781	108.623	2014.556	81.351	Non
Lyn-GFP	EcadmCh	Embryo 25	cell 2	Embryo 25cell 2	5	100.287	306.815	227.492	98.487	2084.831	81.351	Non
Lyn-GFP	EcadmCh	Embryo 25	cell 2	Embryo 25cell 2	6	99.639	427.285	371.264	107.896	3351.839	80.826	Non
Lyn-GFP	EcadmCh	Embryo 25	cell 2	Embryo 25cell 2	7	99.639	545.834	450.454	108.645	3866.708	80.826	Non
Lyn-GFP	EcadmCh	Embryo 25	cell 2	Embryo 25cell 2	8	99.639	605.776	436.183	110.97	4071.071	80.826	Non
Lyn-GFP	EcadmCh	Embryo 25	cell 2	Embryo 25cell 2	9	99.207	688.34	445.651	111.51	3950.181	80.475	Non
Lyn-GFP	EcadmCh	Embryo 25	cell 2	Embryo 25cell 2	10	99.207	734.594	434.606	106.14	3788.95	80.475	Non
Lyn-GFP	EcadmCh	Embryo 25	cell 2	Embryo 25cell 2	11	99.207	785.728	421.601	117.531	3298.082	80.476	Non
Lyn-GFP	EcadmCh	Embryo 25	cell 2	Embryo 25cell 2	12	99.207	840.087	454.012	125.01	3777.896	80.476	Non
Lyn-GFP	EcadmCh	Embryo 25	cell 2	Embryo 25cell 2	13	97.91	876.16	448.05	135.485	3453.556	79.421	Non
Lyn-GFP	EcadmCh	Embryo 25	cell 2	Embryo 25cell 2	14	84.077	866.738	396.481	175.208	3162.47	68.176	Non
Lyn-GFP	EcadmCh	Embryo 25	cell 2	Embryo 25cell 2	15	69.596	707.626	315.107	163.351	1998.073	56.403	Non
Lyn-GFP	EcadmCh	Embryo 25		Embryo 25								Non
Lyn-GFP	EcadmCh	Embryo 25	cell 3	Embryo 25cell 3	1	91.21	156.042	42.149	104.571	363.498	73.974	Non
Lyn-GFP	EcadmCh	Embryo 25	cell 3	Embryo 25cell 3	2	91.21	189.067	74.214	97.323	627.798	73.974	Non
Lyn-GFP	EcadmCh	Embryo 25	cell 3	Embryo 25cell 3	3	91.21	215.653	102.867	106.285	945.855	73.974	Non
Lyn-GFP	EcadmCh	Embryo 25	cell 3	Embryo 25cell 3	4	91.21	278.866	182.713	104.962	1864.307	73.974	Non
Lyn-GFP	EcadmCh	Embryo 25	cell 3	Embryo 25cell 3	5	92.723	422.374	358.386	109.435	3612.083	75.201	Non
Lyn-GFP	EcadmCh	Embryo 25	cell 3	Embryo 25cell 3	6	92.723	520.534	376.531	108.951	3726.858	75.201	Non
Lyn-GFP	EcadmCh	Embryo 25	cell 3	Embryo 25cell 3	7	92.723	531.475	368.136	106.401	3344.015	75.201	Non
Lyn-GFP	EcadmCh	Embryo 25	cell 3	Embryo 25cell 3	8	92.507	530.348	368.321	104.218	3582.766	75.026	Non
Lyn-GFP	EcadmCh	Embryo 25	cell 3	Embryo 25cell 3	9	91.426	564.888	348.991	111.741	2916.81	74.15	Non
Lyn-GFP	EcadmCh	Embryo 25	cell 3	Embryo 25cell 3	10	91.426	610.748	362.933	109.244	3173.653	74.15	Non
Lyn-GFP	EcadmCh	Embryo 25	cell 3	Embryo 25cell 3	11	91.858	650.38	400.119	119.088	3022.047	74.502	Non
Lyn-GFP	EcadmCh	Embryo 25	cell 3	Embryo 25cell 3	12	89.481	785.518	389.646	148.095	3149.066	72.569	Non
Lyn-GFP	EcadmCh	Embryo 25	cell 3	Embryo 25cell 3	13	89.481	783.151	370.837	120.931	2789.436	72.569	Non
Lyn-GFP	EcadmCh	Embryo 25	cell 3	Embryo 25cell 3	14	63.328	839.056	414.232	151.007	2505.745	51.308	Non
Lyn-GFP	EcadmCh	Embryo 25	cell 3	Embryo 25cell 3	15	47.982	868.548	433.98	145.617	2550.407	38.832	Non
Lyn-GFP	EcadmCh	Embryo 25	cell 3	Embryo 25cell 3	16	37.392	696.659	421.128	149.259	3117.54	30.223	Non
Lyn-GFP	EcadmCh											Non
Lyn-GFP	EcadmCh											Non
Lyn-GFP	EcadmCh											Non
Lyn-GFP	EcadmCh	Embryo 26	cell 1	Embryo 26cell 1	1	93.587	143.539	36.52	101.857	430.132	75.907	Non
Lyn-GFP	EcadmCh	Embryo 26	cell 1	Embryo 26cell 1	2	93.587	167.525	66.083	106.826	750.513	75.907	Non
Lyn-GFP	EcadmCh	Embryo 26	cell 1	Embryo 26cell 1	3	93.587	189.425	97.67	96.954	1268.981	75.907	Non
Lyn-GFP	EcadmCh	Embryo 26	cell 1	Embryo 26cell 1	4	93.587	280.035	215.489	100.68	2380.362	75.907	Non
Lyn-GFP	EcadmCh	Embryo 26	cell 1	Embryo 26cell 1	5	93.587	325.053	260.367	101.903	3502.282	75.907	Non
Lyn-GFP	EcadmCh	Embryo 26	cell 1	Embryo 26cell 1	6	93.587	390.476	275.531	109.883	3195.553	75.907	Non
Lyn-GFP	EcadmCh	Embryo 26	cell 1	Embryo 26cell 1	7	94.668	360.247	279.969	105.005	3241.407	76.787	Non
Lyn-GFP	EcadmCh	Embryo 26	cell 1	Embryo 26cell 1	8	94.02	429.049	305.186	110.049	3553.467	76.26	Non
Lyn-GFP	EcadmCh	Embryo 26	cell 1	Embryo 26cell 1	9	90.994	532.799	304.053	114.378	2949.441	73.798	Non
Lyn-GFP	EcadmCh	Embryo 26	cell 1	Embryo 26cell 1	10	89.697	571.435	284.414	114.711	2562.991	72.744	Non
Lyn-GFP	EcadmCh	Embryo 26	cell 1	Embryo 26cell 1	11	40.201	676.725	349.277	129.017	2425.454	32.507	Non
Lyn-GFP	EcadmCh	Embryo 26	cell 1	Embryo 26cell 1	12	32.853	635.639	323.378	156.222	2851.944	26.533	Non
Lyn-GFP	EcadmCh											Non
Lyn-GFP	EcadmCh											Non
Lyn-GFP	EcadmCh											Non
Lyn-GFP	EcadmCh	Embryo 27	cell 1	Embryo 27cell 1	1	99.207	149.959	38.101	102.82	459.036	80.467	Non
Lyn-GFP	EcadmCh	Embryo 27	cell 1	Embryo 27cell 1	2	99.207	165.108	48.01	90.155	516.303	80.467	Non
Lyn-GFP	EcadmCh	Embryo 27	cell 1	Embryo 27cell 1	3	99.207	200.807	75.224	104.464	766.152	80.467	Non
Lyn-GFP	EcadmCh	Embryo 27	cell 1	Embryo 27cell 1	4	99.207	227.309	97.839	103.368	730.625	80.467	Non
Lyn-GFP	EcadmCh	Embryo 27	cell 1	Embryo 27cell 1	5	99.207	222.829	96.459	102.414	923.467	80.467	Non
Lyn-GFP	EcadmCh	Embryo 27	cell 1	Embryo 27cell 1	6	99.207	299.218	173.855	107.336	1433.464	80.467	Non
Lyn-GFP	EcadmCh	Embryo 27	cell 1	Embryo 27cell 1	7	99.207	482.224	382.53	107.493	2840.697	80.467	Non
Lyn-GFP	EcadmCh	Embryo 27	cell 1	Embryo 27cell 1	8	99.207	612.714	526.712	110.206	3716.795	80.467	Non
Lyn-GFP	EcadmCh	Embryo 27	cell 1	Embryo 27cell 1	9	99.207	661.397	552.527	103.179	3846.808	80.468	Non
Lyn-GFP	EcadmCh	Embryo 27	cell 1	Embryo 27cell 1	10	99.207	713.158	519.957	111.231	4095	80.468	Non
Lyn-GFP	EcadmCh	Embryo 27	cell 1	Embryo 27cell 1	11	99.207	713.644	511.564	110.465	4062.398	80.468	Non
Lyn-GFP	EcadmCh	Embryo 27	cell 1	Embryo 27cell 1	12	99.207	706.346	500.913	118.038	4062.346	80.468	Non
Lyn-GFP	EcadmCh	Embryo 27	cell 1	Embryo 27cell 1	13	99.207	714.109	471.626	116.306	4066.452	80.468	Non
Lyn-GFP	EcadmCh	Embryo 27	cell 1	Embryo 27cell 1	14	97.91	777.53	504.916	111.64	3978.498	79.42	Non
Lyn-GFP	EcadmCh	Embryo 27	cell 1	Embryo 27cell 1	15	97.91	782.512	505.571	111.131	4016.507	79.42	Non
Lyn-GFP	EcadmCh	Embryo 27	cell 1	Embryo 27cell 1	16	97.91	790.072	484.563	118.908	4046.046	79.42	Non
Lyn-GFP	EcadmCh	Embryo 27	cell 1	Embryo 27cell 1	17	97.91	802.217	467.467	114.454	3448.121	79.42	Non
Lyn-GFP	EcadmCh	Embryo 27	cell 1	Embryo 27cell 1	18	96.181	815.108	480.213	111.031	3064.616	78.016	Non
Lyn-GFP	EcadmCh	Embryo 27	cell 1	Embryo 27cell 1	19	96.181	807.192	469.279	103.452	2962.15	78.016	Non
Lyn-GFP	EcadmCh	Embryo 27	cell 1	Embryo 27cell 1	20	98.126	680.708	380.631	103.156	3003.836	79.598	Non
Lyn-GFP	EcadmCh	Embryo 27	cell 1	Embryo 27cell 1	21	26.585	812.573	520.471	170.417	3173.553	21.437	Non
Lyn-GFP	EcadmCh	Embryo 27	cell 1	Embryo 27cell 1	22	6.916	1418.305	499.432	426.696	3020.32	5.447	Non
Lyn-GFP	EcadmCh											Non
Lyn-GFP	EcadmCh											Non
Lyn-GFP	EcadmCh											Non
Lyn-GFP	EcadmCh	Embryo 28	cell 1	Embryo 28cell 1	1	128.169	157.685	42.178	103.319	432.912	104.02	Non
Lyn-GFP	EcadmCh	Embryo 28	cell 1	Embryo 28cell 1	2	128.169	175.205	57.275	103.349	582.585	104.02	Non
Lyn-GFP	EcadmCh	Embryo 28	cell 1	Embryo 28cell 1	3	128.169	238.943	123.027	99.443	1135.396	104.02	Non
Lyn-GFP	EcadmCh	Embryo 28	cell 1	Embryo 28cell 1	4	128.169	361.28	261.838	103.525	2336.447	104.02	Non
Lyn-GFP	EcadmCh	Embryo 28	cell 1	Embryo 28cell 1	5	128.169	529.475	457.821	101.436	3521.744	104.02	Non
Lyn-GFP	EcadmCh	Embryo 28	cell 1	Embryo 28cell 1	6	128.169	633.39	522.447	108.437	3925.804	104.02	Non
Lyn-GFP	EcadmCh	Embryo 28	cell 1	Embryo 28cell 1	7	128.169	633.043	477.667	111.227	3828.551	104.02	Non
Lyn-GFP	EcadmCh	Embryo 28	cell 1	Embryo 28cell 1	8	128.169	606.916	417.076	109.631	3567.278	104.02	Non
Lyn-GFP	EcadmCh	Embryo 28	cell 1	Embryo 28cell 1	9	127.088	651.313	426.932	110.953	3825.754	103.143	Non
Lyn-GFP	EcadmCh	Embryo 28	cell 1	Embryo 28cell 1	10	127.088	667.419	409.731	107.495	3760.324	103.143	Non
Lyn-GFP	EcadmCh	Embryo 28	cell 1	Embryo 28cell 1	11	127.953	661.458	393.285	110.742	3590.681	103.846	Non
Lyn-GFP	EcadmCh	Embryo 28	cell 1	Embryo 28cell 1	12	127.953	654.624	377.188	105.609	3200.972	103.846	Non
Lyn-GFP	EcadmCh	Embryo 28	cell 1	Embryo 28cell 1	13	127.953	680.399	363.244	108.119	3016.694	103.845	Non
Lyn-GFP	EcadmCh	Embryo 28	cell 1	Embryo 28cell 1	14	127.953	669.393	367.582	112.063	2932.363	103.845	Non
Lyn-GFP	EcadmCh	Embryo 28	cell 1	Embryo 28cell 1	15	57.492	812.422	377.678	155.726	2695.602	46.562	Non
Lyn-GFP	EcadmCh	Embryo 28	cell 1	Embryo 28cell 1	16	30.908	785.546	312.031	152.863	2120.702	24.952	Non
Lyn-GFP	EcadmCh	Embryo 28		Embryo 28								Non
Lyn-GFP	EcadmCh	Embryo 28	cell 2	Embryo 28cell 2	1	120.604	155.983	43.689	103.519	545.148	97.865	Non
Lyn-GFP	EcadmCh	Embryo 28	cell 2	Embryo 28cell 2	2	120.604	191.43	75.35	104.233	865.495	97.865	Non
Lyn-GFP	EcadmCh	Embryo 28	cell 2	Embryo 28cell 2	3	120.604	257.552	153.229	103.107	1788.742	97.865	Non
Lyn-GFP	EcadmCh	Embryo 28	cell 2	Embryo 28cell 2	4	120.604	385.143	304.724	105.076	2431.562	97.865	Non
Lyn-GFP	EcadmCh	Embryo 28	cell 2	Embryo 28cell 2	5	120.604	535.265	439.297	103.878	3759.15	97.865	Non
Lyn-GFP	EcadmCh	Embryo 28	cell 2	Embryo 28cell 2	6	120.604	617.298	486.926	107.96	4065.082	97.865	Non
Lyn-GFP	EcadmCh	Embryo 28	cell 2	Embryo 28cell 2	7	120.604	639.089	486.517	110.529	4037.365	97.865	Non
Lyn-GFP	EcadmCh	Embryo 28	cell 2	Embryo 28cell 2	8	120.604	629.17	458.524	108.782	3967.97	97.865	Non
Lyn-GFP	EcadmCh	Embryo 28	cell 2	Embryo 28cell 2	9	120.604	626.587	436.517	110.509	3917.209	97.865	Non
Lyn-GFP	EcadmCh	Embryo 28	cell 2	Embryo 28cell 2	10	120.604	623.568	403.689	108.771	3687.511	97.865	Non
Lyn-GFP	EcadmCh	Embryo 28	cell 2	Embryo 28cell 2	11	120.604	620.366	394.499	101.975	3225.905	97.865	Non
Lyn-GFP	EcadmCh	Embryo 28	cell 2	Embryo 28cell 2	12	120.388	640.413	376.825	110.686	3299.263	97.693	Non
Lyn-GFP	EcadmCh	Embryo 28	cell 2	Embryo 28cell 2	13	120.388	629.738	359.768	112.386	3017.684	97.693	Non
Lyn-GFP	EcadmCh	Embryo 28	cell 2	Embryo 28cell 2	14	99.423	702	364.996	127.272	2885.268	80.648	Non
Lyn-GFP	EcadmCh	Embryo 28	cell 2	Embryo 28cell 2	15	53.818	733.859	386.425	138.494	2624.902	43.577	Non
Lyn-GFP	EcadmCh	Embryo 28	cell 2	Embryo 28cell 2	16	53.818	746.224	381.19	144.791	2618.376	43.577	Non
Lyn-GFP	EcadmCh	Embryo 28	cell 2	Embryo 28cell 2	17	58.573	762.818	335.584	119.64	2332.128	47.442	Non
Lyn-GFP	EcadmCh											Non
Lyn-GFP	EcadmCh											Non
Lyn-GFP	EcadmCh											Non
Lyn-GFP	EcadmCh	Embryo 29	cell 1	Embryo 29cell 1	1	105.691	140.1	30.783	99.864	314.629	85.741	Non
Lyn-GFP	EcadmCh	Embryo 29	cell 1	Embryo 29cell 1	2	105.691	155.782	43.74	97.294	496.304	85.741	Non
Lyn-GFP	EcadmCh	Embryo 29	cell 1	Embryo 29cell 1	3	105.691	172.638	59.628	103.062	524.835	85.741	Non
Lyn-GFP	EcadmCh	Embryo 29	cell 1	Embryo 29cell 1	4	105.691	250.872	155.984	104.369	1295.834	85.741	Non
Lyn-GFP	EcadmCh	Embryo 29	cell 1	Embryo 29cell 1	5	105.691	371.427	287.183	100.738	2301.824	85.741	Non
Lyn-GFP	EcadmCh	Embryo 29	cell 1	Embryo 29cell 1	6	105.691	409.041	317.694	102.278	3285.612	85.741	Non
Lyn-GFP	EcadmCh	Embryo 29	cell 1	Embryo 29cell 1	7	105.691	433.196	311.895	98.921	3484.92	85.741	Non
Lyn-GFP	EcadmCh	Embryo 29	cell 1	Embryo 29cell 1	8	105.691	432.416	291.932	101.756	3187.648	85.741	Non
Lyn-GFP	EcadmCh	Embryo 29	cell 1	Embryo 29cell 1	9	105.691	422.142	257.396	103.013	2838.24	85.741	Non
Lyn-GFP	EcadmCh	Embryo 29	cell 1	Embryo 29cell 1	10	105.691	426.469	275.543	110.716	3006.404	85.741	Non
Lyn-GFP	EcadmCh	Embryo 29	cell 1	Embryo 29cell 1	11	105.691	433.992	276.455	108.619	2872.768	85.741	Non
Lyn-GFP	EcadmCh	Embryo 29	cell 1	Embryo 29cell 1	12	105.691	443.93	289.738	105.344	3174.596	85.741	Non
Lyn-GFP	EcadmCh	Embryo 29	cell 1	Embryo 29cell 1	13	102.665	533.142	298.06	105.034	2577.449	83.285	Non
Lyn-GFP	EcadmCh	Embryo 29	cell 1	Embryo 29cell 1	14	102.665	509.271	261.861	110.374	2051.951	83.285	Non
Lyn-GFP	EcadmCh	Embryo 29	cell 1	Embryo 29cell 1	15	81.484	534.814	237.671	128.149	1692.325	66.068	Non
Lyn-GFP	EcadmCh	Embryo 29	cell 1	Embryo 29cell 1	16	81.484	521.584	231.016	112.754	1654.993	66.068	Non
Lyn-GFP	EcadmCh	Embryo 29	cell 1	Embryo 29cell 1	17	49.279	438.795	220.662	113.14	1359.753	39.887	Non
Lyn-GFP	EcadmCh	Embryo 29	cell 1	Embryo 29cell 1	18	49.279	420.28	197.43	110.661	1421.406	39.887	Non
Lyn-GFP	EcadmCh	Embryo 29		Embryo 29								Non
Lyn-GFP	EcadmCh	Embryo 29	cell 2	Embryo 29cell 2	1	102.449	152.087	37.401	102.026	406.667	83.106	Non
Lyn-GFP	EcadmCh	Embryo 29	cell 2	Embryo 29cell 2	2	102.449	172.016	52.124	101.038	482.53	83.106	Non
Lyn-GFP	EcadmCh	Embryo 29	cell 2	Embryo 29cell 2	3	102.449	214.687	93.692	107.344	911.743	83.106	Non
Lyn-GFP	EcadmCh	Embryo 29	cell 2	Embryo 29cell 2	4	102.449	310.585	201.007	95.461	1626.312	83.106	Non
Lyn-GFP	EcadmCh	Embryo 29	cell 2	Embryo 29cell 2	5	102.449	422.091	306.893	108.262	3197.12	83.106	Non
Lyn-GFP	EcadmCh	Embryo 29	cell 2	Embryo 29cell 2	6	102.449	440.352	309.541	107.613	3454.604	83.106	Non
Lyn-GFP	EcadmCh	Embryo 29	cell 2	Embryo 29cell 2	7	102.449	440.494	267.464	108.003	2992.398	83.106	Non
Lyn-GFP	EcadmCh	Embryo 29	cell 2	Embryo 29cell 2	8	102.449	441.94	251.104	112.963	2939.648	83.106	Non
Lyn-GFP	EcadmCh	Embryo 29	cell 2	Embryo 29cell 2	9	102.449	460.819	245.33	115.391	2270.253	83.106	Non
Lyn-GFP	EcadmCh	Embryo 29	cell 2	Embryo 29cell 2	10	102.017	509.37	273.136	112.579	2327.066	82.76	Non
Lyn-GFP	EcadmCh	Embryo 29	cell 2	Embryo 29cell 2	11	102.017	527.581	275.513	109.15	1874.843	82.76	Non
Lyn-GFP	EcadmCh	Embryo 29	cell 2	Embryo 29cell 2	12	102.017	529.426	277.833	113.547	2313.03	82.76	Non
Lyn-GFP	EcadmCh	Embryo 29	cell 2	Embryo 29cell 2	13	102.017	523.726	240.791	111.392	1667.741	82.76	Non
Lyn-GFP	EcadmCh	Embryo 29	cell 2	Embryo 29cell 2	14	51.873	393.381	214.769	109.215	1629.187	41.996	Non
