# Supplementary material for: Stepwise polarisation of developing bilayered epidermis is mediated by aPKC and E-cadherin in zebrafish
Source: eLife. 2020 Jan 22;9:e49064. doi: 10.7554/eLife.49064 (PMC6975926; doi:10.7554/eLife.49064)
Supplement: Figure 1—figure supplement 4—source data 2. [file elife-49064-fig1-figsupp4-data2.csv]

Genotype	Treatment	Embryo	Cell	Cell name	Slice	Area	Mean	StdDev	Min	Max	Length	Boundary
Lyn-GFP	EcadmCh	h2	c1	h2c1	1	96.397	760.043	336.571	172.439	2142.874	78.189	1
Lyn-GFP	EcadmCh	h2	c1	h2c1	2	79.971	811.813	334.565	198.08	2353.314	64.832	1
Lyn-GFP	EcadmCh	h2	c1	h2c1	3	79.971	770.159	324.144	210.239	2148.952	64.832	1
Lyn-GFP	EcadmCh	h2	c1	h2c1	4	99.207	685.221	288.504	183.382	1859.305	80.476	1
Lyn-GFP	EcadmCh	h2	c1	h2c1	5	99.207	629.371	266.478	180.769	1840.707	80.476	1
Lyn-GFP	EcadmCh	h2	c1	h2c1	6	99.207	587.901	254.779	172.497	1650.936	80.476	1
Lyn-GFP	EcadmCh	h2	c1	h2c1	7	99.207	509.846	220.941	142.799	1523.617	80.476	1
Lyn-GFP	EcadmCh	h2	c1	h2c1	8	52.954	530.458	187.549	174.602	1612.354	42.872	1
Lyn-GFP	EcadmCh	h2	c1	h2c1	9	52.954	462.877	156.201	165.458	1264.997	42.872	1
Lyn-GFP	EcadmCh											1
Lyn-GFP	EcadmCh											1
Lyn-GFP	EcadmCh	h3	c1	h3c1	1	29.611	788.487	257.038	299.676	1827.431	23.897	1
Lyn-GFP	EcadmCh	h3	c1	h3c1	2	71.109	661.686	216.446	220.042	1638.619	57.633	1
Lyn-GFP	EcadmCh	h3	c1	h3c1	3	71.109	566.57	191.42	204.909	1850.87	57.633	1
Lyn-GFP	EcadmCh	h3	c1	h3c1	4	70.244	509.133	159.425	178.526	1411.634	56.93	1
Lyn-GFP	EcadmCh	h3	c1	h3c1	5	68.732	456.778	122.486	170.716	1023.977	55.698	1
Lyn-GFP	EcadmCh	h3	c1	h3c1	6	68.732	408.681	104.731	171.364	860.163	55.698	1
Lyn-GFP	EcadmCh	h3	c1	h3c1	7	71.974	346.914	94.371	145.238	953.662	58.337	1
Lyn-GFP	EcadmCh	h3		h3								1
Lyn-GFP	EcadmCh	h3	c2	h3c2	1	28.53	777.616	267.922	263.519	1970.528	23.018	1
Lyn-GFP	EcadmCh	h3	c2	h3c2	2	94.668	767.04	313.151	268.793	3932.798	76.785	1
Lyn-GFP	EcadmCh	h3	c2	h3c2	3	94.668	749.234	276.869	254.287	2713.168	76.785	1
Lyn-GFP	EcadmCh	h3	c2	h3c2	4	93.155	744.734	271.704	198.434	2137.357	75.556	1
Lyn-GFP	EcadmCh	h3	c2	h3c2	5	93.155	684.798	280.085	198.842	3618.944	75.556	1
Lyn-GFP	EcadmCh	h3	c2	h3c2	6	91.642	609.431	248.472	171.944	3968.37	74.324	1
Lyn-GFP	EcadmCh	h3	c2	h3c2	7	91.642	534.764	204.191	153.042	3478.76	74.324	1
Lyn-GFP	EcadmCh	h3	c2	h3c2	8	91.642	464.656	153.544	160.932	1734.698	74.324	1
Lyn-GFP	EcadmCh	h3	c2	h3c2	9	93.155	404.654	117.315	148.49	1011.143	75.556	1
Lyn-GFP	EcadmCh	h3		h3								1
Lyn-GFP	EcadmCh	h3	c3	h3c3	1	51.441	809.77	267.372	249.741	1782.17	41.642	1
Lyn-GFP	EcadmCh	h3	c3	h3c3	2	75.864	753.805	250.481	218.171	2025.993	61.499	1
Lyn-GFP	EcadmCh	h3	c3	h3c3	3	103.53	685.289	223.153	192.608	2023.052	83.99	1
Lyn-GFP	EcadmCh	h3	c3	h3c3	4	103.53	624.135	196.839	158.996	1723.189	83.99	1
Lyn-GFP	EcadmCh	h3	c3	h3c3	5	106.123	567.731	171.213	178.288	1391.587	86.091	1
Lyn-GFP	EcadmCh	h3	c3	h3c3	6	106.123	479.404	136.413	162.854	1302.747	86.091	1
Lyn-GFP	EcadmCh	h3	c3	h3c3	7	106.123	421.388	112.695	169.789	991.955	86.091	1
Lyn-GFP	EcadmCh	h3		h3								1
Lyn-GFP	EcadmCh	h3	c4	h3c4	1	75.216	811.551	263.731	289.537	3105.057	60.965	1
Lyn-GFP	EcadmCh	h3	c4	h3c4	2	75.216	786.576	263.936	240.358	2926.784	60.965	1
Lyn-GFP	EcadmCh	h3	c4	h3c4	3	74.783	772.819	275.868	267.336	3217.472	60.618	1
Lyn-GFP	EcadmCh	h3	c4	h3c4	4	74.783	708.823	254.417	251.156	2804.021	60.618	1
Lyn-GFP	EcadmCh	h3	c4	h3c4	5	74.783	593.583	206.291	203.564	1761.926	60.618	1
Lyn-GFP	EcadmCh	h3	c4	h3c4	6	71.541	516.377	180.552	159.478	1494.145	57.983	1
Lyn-GFP	EcadmCh	h3	c4	h3c4	7	77.377	452.962	156	136.957	1779.237	62.73	1
Lyn-GFP	EcadmCh											1
Lyn-GFP	EcadmCh											1
Lyn-GFP	EcadmCh											1
Lyn-GFP	EcadmCh											1
Lyn-GFP	EcadmCh	h5	c1	h5c1	1	17.723	807.135	422.876	171.901	2078.903	14.233	1
Lyn-GFP	EcadmCh	h5	c1	h5c1	2	51.657	662.58	288.826	173.036	2051.087	41.819	1
Lyn-GFP	EcadmCh	h5	c1	h5c1	3	51.657	617.683	260.224	165.019	1841.015	41.819	1
Lyn-GFP	EcadmCh	h5	c1	h5c1	4	74.135	665.284	264.028	214.359	1910.234	60.092	1
Lyn-GFP	EcadmCh	h5	c1	h5c1	5	75.648	660.426	270.399	154.939	1635.801	61.319	1
Lyn-GFP	EcadmCh	h5	c1	h5c1	6	75.864	639.136	264.692	196.051	1898.789	61.494	1
Lyn-GFP	EcadmCh	h5	c1	h5c1	7	77.161	627.488	269.23	156.2	1756.98	62.491	1
Lyn-GFP	EcadmCh	h5	c1	h5c1	8	74.567	555.431	235.631	146.087	1645.349	60.442	1
Lyn-GFP	EcadmCh	h5	c1	h5c1	9	77.377	472.091	185.469	154.642	1404.385	62.719	1
Lyn-GFP	EcadmCh	h5	c1	h5c1	10	77.377	413.069	151.239	142.428	1339.863	62.719	1
Lyn-GFP	EcadmCh	h5	c1	h5c1	11	46.902	359.014	122.485	150.999	913.876	37.954	1
Lyn-GFP	EcadmCh											1
Lyn-GFP	EcadmCh											1
Lyn-GFP	EcadmCh											1
Lyn-GFP	EcadmCh											1
Lyn-GFP	EcadmCh	h6	c1	h6c1	1	62.464	637.193	230.04	179.009	1649.292	50.604	1
Lyn-GFP	EcadmCh	h6	c1	h6c1	2	73.703	643.266	227.44	160.349	1675.903	59.735	1
Lyn-GFP	EcadmCh	h6	c1	h6c1	3	100.287	643.431	210.413	199.654	1657.951	81.351	1
Lyn-GFP	EcadmCh	h6	c1	h6c1	4	100.287	625.34	201.874	180.53	1530.893	81.35	1
Lyn-GFP	EcadmCh	h6	c1	h6c1	5	100.287	604.866	192.061	172.386	1332.945	81.35	1
Lyn-GFP	EcadmCh	h6	c1	h6c1	6	103.53	542.502	178.622	156.159	1481.006	83.985	1
Lyn-GFP	EcadmCh	h6	c1	h6c1	7	103.53	446.544	135.206	163.738	1174.161	83.985	1
Lyn-GFP	EcadmCh	h6	c1	h6c1	8	103.53	408.789	130.295	166.616	1248.218	83.985	1
Lyn-GFP	EcadmCh											1
Lyn-GFP	EcadmCh											1
Lyn-GFP	EcadmCh											1
Lyn-GFP	EcadmCh											1
Lyn-GFP	EcadmCh	h8	c1	h8c1	1	78.674	492.822	185.217	148.22	1368.897	63.784	1
Lyn-GFP	EcadmCh	h8	c1	h8c1	2	68.732	439.651	186.646	144.865	1330.748	55.701	1
Lyn-GFP	EcadmCh	h8	c1	h8c1	3	84.509	478.219	168.95	152.853	1148.29	68.526	1
Lyn-GFP	EcadmCh	h8	c1	h8c1	4	100.936	463.085	159.179	146.731	1141.009	81.88	1
Lyn-GFP	EcadmCh	h8	c1	h8c1	5	100.936	429.276	153.153	153.154	1280.273	81.88	1
Lyn-GFP	EcadmCh	h8	c1	h8c1	6	99.207	397.012	144.128	156.395	1147.491	80.473	1
Lyn-GFP	EcadmCh	h8	c1	h8c1	7	99.207	356.131	126.513	145.155	1070.651	80.473	1
Lyn-GFP	EcadmCh	h8	c1	h8c1	8	30.691	389.739	110.038	153.838	834.211	24.775	1
Lyn-GFP	EcadmCh	h8	c1	h8c1	9	30.691	335.511	81.214	155.158	747.492	24.775	1
Lyn-GFP	EcadmCh	h8	c1	h8c1	10	30.691	300.161	65.137	154.17	592.804	24.775	1
Lyn-GFP	EcadmCh	h8		h8								1
Lyn-GFP	EcadmCh	h8	c2	h8c2	1	26.369	631.253	244.015	178.549	1652.897	21.26	1
Lyn-GFP	EcadmCh	h8	c2	h8c2	2	87.752	558.903	209.511	155.482	1669.915	71.159	1
Lyn-GFP	EcadmCh	h8	c2	h8c2	3	87.752	547.991	196.687	161.009	1536.935	71.159	1
Lyn-GFP	EcadmCh	h8	c2	h8c2	4	90.777	533.574	182.598	148.434	1357.878	73.623	1
Lyn-GFP	EcadmCh	h8	c2	h8c2	5	90.777	485.589	163.243	148.606	1341.283	73.623	1
Lyn-GFP	EcadmCh	h8	c2	h8c2	6	90.777	433.073	150.82	161.736	1094.575	73.623	1
Lyn-GFP	EcadmCh	h8	c2	h8c2	7	91.426	419.088	138.165	136.279	1165	74.149	1
Lyn-GFP	EcadmCh	h8	c2	h8c2	8	91.426	369.862	119.559	159.724	1244.39	74.149	1
Lyn-GFP	EcadmCh	h8	c2	h8c2	9	91.426	316.034	97.425	139.221	1119.705	74.149	1
Lyn-GFP	EcadmCh	h8		h8								1
Lyn-GFP	EcadmCh	h8	c3	h8c3	1	66.354	440.908	145.893	143.121	1052.055	53.766	1
Lyn-GFP	EcadmCh	h8	c3	h8c3	2	83.861	409.877	152.86	146.373	1047.782	67.996	1
Lyn-GFP	EcadmCh	h8	c3	h8c3	3	83.213	411.674	153.937	140.558	1071.148	67.472	1
Lyn-GFP	EcadmCh	h8	c3	h8c3	4	83.213	394.556	142.29	141.232	1026.378	67.472	1
Lyn-GFP	EcadmCh	h8	c3	h8c3	5	85.806	392.638	129.737	143.7	1037.471	69.58	1
Lyn-GFP	EcadmCh	h8	c3	h8c3	6	85.806	379.548	124.732	144.925	1043.884	69.58	1
Lyn-GFP	EcadmCh	h8	c3	h8c3	7	84.726	359.226	126.378	145.641	1010.467	68.7	1
Lyn-GFP	EcadmCh	h8	c3	h8c3	8	84.726	339.247	112.168	147.233	925.461	68.7	1
Lyn-GFP	EcadmCh	h8	c3	h8c3	9	72.838	299.176	91.758	143.433	830.547	59.037	1
Lyn-GFP	EcadmCh	h8	c3	h8c3	10	72.838	261.927	67.585	144.618	685.86	59.037	1
Lyn-GFP	EcadmCh	h8		h8								1
Lyn-GFP	EcadmCh	h8	c4	h8c4	1	84.077	475.768	186.571	144.718	1464.586	68.17	1
Lyn-GFP	EcadmCh	h8	c4	h8c4	2	87.535	464.691	176.815	150.736	1118.678	70.983	1
Lyn-GFP	EcadmCh	h8	c4	h8c4	3	91.858	468.807	165.756	147.187	1379.625	74.499	1
Lyn-GFP	EcadmCh	h8	c4	h8c4	4	91.858	462.058	166.721	149.412	1126.038	74.499	1
Lyn-GFP	EcadmCh	h8	c4	h8c4	5	91.858	441.72	170.089	146.52	1146.025	74.499	1
Lyn-GFP	EcadmCh	h8	c4	h8c4	6	90.345	416.15	154.606	153.536	1102.153	73.27	1
Lyn-GFP	EcadmCh	h8	c4	h8c4	7	90.345	372.597	138.85	149	1040.42	73.272	1
Lyn-GFP	EcadmCh	h8	c4	h8c4	8	90.345	331.241	110.097	144.985	870.114	73.272	1
Lyn-GFP	EcadmCh	h8	c4	h8c4	9	39.769	338.894	97.889	146.85	751.286	32.156	1
Lyn-GFP	EcadmCh	h8	c4	h8c4	10	39.769	309.86	81.842	143.146	697.966	32.156	1
Lyn-GFP	EcadmCh											1
Lyn-GFP	EcadmCh											1
Lyn-GFP	EcadmCh											1
Lyn-GFP	EcadmCh											1
Lyn-GFP	EcadmCh	h9	c1	h9c1	1	59.654	467.211	144.172	190.913	1215.495	48.321	1
Lyn-GFP	EcadmCh	h9	c1	h9c1	2	72.19	452.137	147.46	160.268	1135.522	58.513	1
Lyn-GFP	EcadmCh	h9	c1	h9c1	3	95.316	458.794	163.749	148.718	1301.199	77.31	1
Lyn-GFP	EcadmCh	h9	c1	h9c1	4	95.316	436.932	160.489	138.013	1300.424	77.31	1
Lyn-GFP	EcadmCh	h9	c1	h9c1	5	95.316	391.507	147.725	147.409	1088.249	77.31	1
Lyn-GFP	EcadmCh	h9	c1	h9c1	6	95.316	357.066	124.541	139.158	1036.243	77.31	1
Lyn-GFP	EcadmCh	h9	c1	h9c1	7	95.1	297.54	80.373	148.354	705.338	77.136	1
Lyn-GFP	EcadmCh	h9	c1	h9c1	8	26.369	333.927	82.027	157.785	721.911	21.261	1
Lyn-GFP	EcadmCh	h9		h9								1
Lyn-GFP	EcadmCh	h9	c2	h9c2	1	28.53	527.613	177.624	190.839	1440.526	23.015	1
Lyn-GFP	EcadmCh	h9	c2	h9c2	2	28.53	518.216	196.21	151.953	1239.414	23.015	1
Lyn-GFP	EcadmCh	h9	c2	h9c2	3	66.138	452.91	154.376	150.461	1173.381	53.592	1
Lyn-GFP	EcadmCh	h9	c2	h9c2	4	66.138	452.194	154.533	160.76	1095.417	53.592	1
Lyn-GFP	EcadmCh	h9	c2	h9c2	5	67.002	463.715	158.41	155.818	1234.537	54.294	1
Lyn-GFP	EcadmCh	h9	c2	h9c2	6	67.002	439.544	140.383	140.34	1390.686	54.294	1
Lyn-GFP	EcadmCh	h9	c2	h9c2	7	67.002	389.69	126.818	147.181	956.175	54.294	1
Lyn-GFP	EcadmCh	h9	c2	h9c2	8	53.386	370.286	129.616	146.483	1022.055	43.225	1
Lyn-GFP	EcadmCh	h9	c2	h9c2	9	53.386	336.707	119.329	145.171	932.162	43.225	1
Lyn-GFP	EcadmCh	h9	c2	h9c2	10	18.372	374.432	119.765	146.096	817.12	14.759	1
Lyn-GFP	EcadmCh											1
Lyn-GFP	EcadmCh											1
Lyn-GFP	EcadmCh											1
Lyn-GFP	EcadmCh											1
Lyn-GFP	EcadmCh	h10	c1	h10c1	1	92.29	392.051	133.389	144.227	1054.442	74.849	1
Lyn-GFP	EcadmCh	h10	c1	h10c1	2	119.74	389.448	128.85	146.356	1339.941	97.164	1
Lyn-GFP	EcadmCh	h10	c1	h10c1	3	119.308	401.82	133.296	154.616	1108.13	96.812	1
Lyn-GFP	EcadmCh	h10	c1	h10c1	4	119.308	384.807	121.931	136.74	982.684	96.812	1
Lyn-GFP	EcadmCh	h10	c1	h10c1	5	119.524	341.593	96.437	144.781	902.801	96.991	1
Lyn-GFP	EcadmCh	h10	c1	h10c1	6	119.524	299.707	76.266	145.144	752.455	96.991	1
Lyn-GFP	EcadmCh	h10		h10								1
Lyn-GFP	EcadmCh	h10	c2	h10c2	1	60.734	365.919	112.829	146.329	841.597	49.198	1
Lyn-GFP	EcadmCh	h10	c2	h10c2	2	71.757	382.435	117.001	147.437	970.275	58.159	1
Lyn-GFP	EcadmCh	h10	c2	h10c2	3	71.757	372.066	119.89	141.222	920.091	58.159	1
Lyn-GFP	EcadmCh	h10	c2	h10c2	4	99.423	361.833	116.76	145.939	899.853	80.649	1
Lyn-GFP	EcadmCh	h10	c2	h10c2	5	90.561	348.388	115.851	145.188	991.8	73.446	1
Lyn-GFP	EcadmCh	h10	c2	h10c2	6	90.561	325.339	109.095	143.807	850.46	73.446	1
Lyn-GFP	EcadmCh	h10	c2	h10c2	7	43.443	344.434	101.642	147.69	931.878	35.142	1
Lyn-GFP	EcadmCh	h10	c2	h10c2	8	43.443	306.608	81.452	150.206	860.175	35.142	1
Lyn-GFP	EcadmCh											1
Lyn-GFP	EcadmCh											1
Lyn-GFP	EcadmCh											1
Lyn-GFP	EcadmCh	h11	c1	h11c1	1	40.634	437.465	127.606	160.526	1036.327	32.859	1
Lyn-GFP	EcadmCh	h11	c1	h11c1	2	86.455	378.266	141.846	149.518	1377.436	70.108	1
Lyn-GFP	EcadmCh	h11	c1	h11c1	3	94.668	367.958	105.579	149.047	878.924	76.785	1
Lyn-GFP	EcadmCh	h11	c1	h11c1	4	94.668	325.772	90.841	145.185	1013.428	76.785	1
Lyn-GFP	EcadmCh	h11	c1	h11c1	5	98.126	325.308	85.267	146.044	827.016	79.598	1
Lyn-GFP	EcadmCh	h11	c1	h11c1	6	98.126	291.475	73.799	142.273	740.371	79.598	1
Lyn-GFP	EcadmCh											1
Lyn-GFP	EcadmCh											1
Lyn-GFP	EcadmCh											1
Lyn-GFP	EcadmCh	h14	c1	h14c1	1	99.423	463.773	137.488	152.833	1142.692	80.651	1
Lyn-GFP	EcadmCh	h14	c1	h14c1	2	101.152	450.17	140.446	160.173	1387.745	82.054	1
Lyn-GFP	EcadmCh	h14	c1	h14c1	3	106.123	434.109	135.117	155.743	1093.443	86.095	1
Lyn-GFP	EcadmCh	h14	c1	h14c1	4	106.123	424.867	127.374	159.624	1103.222	86.095	1
Lyn-GFP	EcadmCh	h14	c1	h14c1	5	105.691	407.695	127.432	144.571	986.321	85.745	1
Lyn-GFP	EcadmCh	h14	c1	h14c1	6	105.691	356.335	104.114	149.927	887.251	85.745	1
Lyn-GFP	EcadmCh	h14		h14								1
Lyn-GFP	EcadmCh	h14	c2	h14c2	1	118.443	517.681	178.692	168.214	1501.606	96.115	1
Lyn-GFP	EcadmCh	h14	c2	h14c2	2	122.333	489.277	168.574	160.117	1487.985	99.276	1
Lyn-GFP	EcadmCh	h14	c2	h14c2	3	122.333	465.092	149.082	155.327	1301.179	99.276	1
Lyn-GFP	EcadmCh	h14	c2	h14c2	4	122.333	445.623	144.465	148.069	1297.46	99.276	1
Lyn-GFP	EcadmCh	h14	c2	h14c2	5	79.106	419.316	123.129	161.963	1117.5	64.13	1
Lyn-GFP	EcadmCh	h14	c2	h14c2	6	79.106	358.08	115.902	153.783	1946.159	64.13	1
Lyn-GFP	EcadmCh	h14	c2	h14c2	7	41.498	337.613	98.692	151.605	745.587	33.562	1
												1
Lyn-GFP	EcadmCh	h1	c1	h1c1	1	74.351	345.299	143.674	111.568	1112.518	60.268	1
Lyn-GFP	EcadmCh	h1	c1	h1c1	2	79.754	325.746	129.165	106.816	995.407	64.662	1
Lyn-GFP	EcadmCh	h1	c1	h1c1	3	80.403	334.935	125.764	103.233	1043.907	65.187	1
Lyn-GFP	EcadmCh	h1	c1	h1c1	4	80.403	319.058	112.969	112.677	840.815	65.187	1
Lyn-GFP	EcadmCh	h1	c1	h1c1	5	80.835	313.678	113.948	100.848	832.004	65.54	1
Lyn-GFP	EcadmCh	h1	c1	h1c1	6	80.835	305.785	105.956	110.827	755.45	65.54	1
Lyn-GFP	EcadmCh	h1	c1	h1c1	7	80.835	282.04	102.003	101.348	812.951	65.54	1
Lyn-GFP	EcadmCh	h1	c1	h1c1	8	80.835	245.699	82.205	102.63	874.796	65.54	1
Lyn-GFP	EcadmCh	h1	c1	h1c1	9	80.835	211.609	61.722	93.751	595.501	65.54	1
Lyn-GFP	EcadmCh	h1		h1								1
Lyn-GFP	EcadmCh	h1	c2	h1c2	1	31.124	357.405	107.51	110.504	806.1	25.126	1
Lyn-GFP	EcadmCh	h1	c2	h1c2	2	76.945	376.28	193.667	110.164	3093.582	62.374	1
Lyn-GFP	EcadmCh	h1	c2	h1c2	3	76.729	339.615	128.377	107.295	1000.449	62.201	1
Lyn-GFP	EcadmCh	h1	c2	h1c2	4	76.729	294.69	109.771	110.589	778.569	62.201	1
Lyn-GFP	EcadmCh	h1	c2	h1c2	5	81.7	288.602	118.512	109.261	1718.591	66.241	1
Lyn-GFP	EcadmCh	h1	c2	h1c2	6	81.7	255.55	86.933	106.255	813.141	66.241	1
Lyn-GFP	EcadmCh											1
Lyn-GFP	EcadmCh											1
Lyn-GFP	EcadmCh											1
Lyn-GFP	EcadmCh	h15	c1	h15c1	1	59.221	618.047	268.12	128.896	1851.282	47.97	1
Lyn-GFP	EcadmCh	h15	c1	h15c1	2	83.429	531.113	242.29	122.39	1806.719	67.649	1
Lyn-GFP	EcadmCh	h15	c1	h15c1	3	82.564	534.148	231.688	109.104	1832.568	66.945	1
Lyn-GFP	EcadmCh	h15	c1	h15c1	4	82.564	480.194	191.934	117.018	1654.252	66.945	1
Lyn-GFP	EcadmCh	h15	c1	h15c1	5	83.645	446.441	184.079	118.1	1414.618	67.816	1
Lyn-GFP	EcadmCh	h15	c1	h15c1	6	83.645	391.042	146.163	110.331	1086.592	67.816	1
Lyn-GFP	EcadmCh	h15	c1	h15c1	7	83.645	360.086	122.666	111.999	891.48	67.816	1
Lyn-GFP	EcadmCh	h15		h15								1
Lyn-GFP	EcadmCh	h15	c2	h15c2	1	10.158	687.184	293.113	170.821	1500.334	8.083	1
Lyn-GFP	EcadmCh	h15	c2	h15c2	2	54.466	725.906	271.697	168.504	1855.893	44.1	1
Lyn-GFP	EcadmCh	h15	c2	h15c2	3	80.187	652.659	282.612	131.694	2011.285	65.011	1
Lyn-GFP	EcadmCh	h15	c2	h15c2	4	87.752	577.552	263.382	108.572	1738.535	71.163	1
Lyn-GFP	EcadmCh	h15	c2	h15c2	5	87.752	555.802	235.265	111.581	1768.485	71.163	1
Lyn-GFP	EcadmCh	h15	c2	h15c2	6	87.752	521.571	211.547	115.792	1874.812	71.163	1
Lyn-GFP	EcadmCh	h15	c2	h15c2	7	90.561	458.105	189.128	111.491	1433.732	73.446	1
Lyn-GFP	EcadmCh	h15	c2	h15c2	8	90.561	406.465	160.436	107.075	1591.079	73.446	1
Lyn-GFP	EcadmCh	h15	c2	h15c2	9	90.561	318.252	104.926	106.786	888.362	73.446	1
Lyn-GFP	EcadmCh	h15		h15								1
Lyn-GFP	EcadmCh	h15	c3	h15c3	1	65.489	628.45	320.55	111.97	2007.426	53.065	1
Lyn-GFP	EcadmCh	h15	c3	h15c3	2	66.57	639.883	326.382	102.73	2072.893	53.943	1
Lyn-GFP	EcadmCh	h15	c3	h15c3	3	73.27	549.608	301.581	111.813	1998.96	59.39	1
Lyn-GFP	EcadmCh	h15	c3	h15c3	4	73.27	535.159	288.235	114.749	2675.448	59.39	1
Lyn-GFP	EcadmCh	h15	c3	h15c3	5	73.054	554.434	274.855	121.454	1927.838	59.214	1
Lyn-GFP	EcadmCh	h15	c3	h15c3	6	72.622	516.06	235.209	115.471	1574.387	58.863	1
Lyn-GFP	EcadmCh	h15	c3	h15c3	7	69.596	498.58	227.514	120.262	1456.845	56.399	1
Lyn-GFP	EcadmCh	h15	c3	h15c3	8	69.596	473.353	199.693	116.441	1458.733	56.399	1
Lyn-GFP	EcadmCh	h15	c3	h15c3	9	69.596	403.454	156.701	119.944	1152.848	56.399	1
Lyn-GFP	EcadmCh	h15	c3	h15c3	10	69.596	349.082	116.042	115.714	812.142	56.399	1
Lyn-GFP	EcadmCh	h15	c3	h15c3	11	69.596	304.555	95.23	112.581	726.466	56.399	1
Lyn-GFP	EcadmCh											1
Lyn-GFP	EcadmCh											1
Lyn-GFP	EcadmCh											1
Lyn-GFP	EcadmCh											1
Lyn-GFP	EcadmCh	h16	c1	h16c1	1	69.164	345.966	123.017	107.309	1202.303	56.05	1
Lyn-GFP	EcadmCh	h16	c1	h16c1	2	74.783	313.732	117.783	98.418	1276.299	60.621	1
Lyn-GFP	EcadmCh	h16	c1	h16c1	3	83.213	300.513	109.884	112.791	1059.017	67.464	1
Lyn-GFP	EcadmCh	h16	c1	h16c1	4	83.213	264.854	85.83	112.108	919.704	67.464	1
Lyn-GFP	EcadmCh	h16	c1	h16c1	5	83.213	247.478	77.07	112.454	772.968	67.464	1
Lyn-GFP	EcadmCh	h16	c1	h16c1	6	79.754	228.047	71.743	106.029	567.113	64.661	1
Lyn-GFP	EcadmCh	h16	c1	h16c1	7	79.754	198.003	56.087	106.965	448.63	64.661	1
Lyn-GFP	EcadmCh											1
Lyn-GFP	EcadmCh											1
Lyn-GFP	EcadmCh											1
Lyn-GFP	EcadmCh											1
Lyn-GFP	EcadmCh	h17	c1	h17c1	1	66.138	457.257	163.312	139.3	1251.58	53.59	1
Lyn-GFP	EcadmCh	h17	c1	h17c1	2	80.403	458.37	152.916	131.123	1319.139	65.188	1
Lyn-GFP	EcadmCh	h17	c1	h17c1	3	80.403	446.099	152.085	119.29	1300.815	65.188	1
Lyn-GFP	EcadmCh	h17	c1	h17c1	4	80.403	415.808	133.222	121.862	1313.355	65.188	1
Lyn-GFP	EcadmCh	h17	c1	h17c1	5	80.835	362.188	122.105	122.833	1058.186	65.54	1
Lyn-GFP	EcadmCh	h17	c1	h17c1	6	80.835	317.58	97.164	112.457	836.723	65.54	1
Lyn-GFP	EcadmCh	h17	c1	h17c1	7	80.835	282.81	81.038	114.433	703.529	65.54	1
Lyn-GFP	EcadmCh	h17		h17								1
Lyn-GFP	EcadmCh	h17	c2	h17c2	1	47.118	406.941	130.614	112.142	900.749	38.13	1
Lyn-GFP	EcadmCh	h17	c2	h17c2	2	47.118	415.96	135.575	130.414	889.977	38.13	1
Lyn-GFP	EcadmCh	h17	c2	h17c2	3	83.645	411.904	141.947	117.024	1033.772	67.824	1
Lyn-GFP	EcadmCh	h17	c2	h17c2	4	83.645	384.008	130.458	111.384	947.56	67.824	1
Lyn-GFP	EcadmCh	h17	c2	h17c2	5	88.184	371.971	141.807	119.217	1266.716	71.503	1
Lyn-GFP	EcadmCh	h17	c2	h17c2	6	88.184	316.243	117.442	102.325	910.693	71.503	1
Lyn-GFP	EcadmCh	h17	c2	h17c2	7	52.521	319.335	115.526	114.515	906.189	42.522	1
Lyn-GFP	EcadmCh	h17	c2	h17c2	8	52.521	287.252	96.42	114.278	766.39	42.522	1
Lyn-GFP	EcadmCh	h17		h17								1
Lyn-GFP	EcadmCh	h17	c3	h17c3	1	72.406	354.44	168.975	107.759	1761.582	58.689	1
Lyn-GFP	EcadmCh	h17	c3	h17c3	2	98.558	327.013	140.95	104.38	1328.933	79.946	1
Lyn-GFP	EcadmCh	h17	c3	h17c3	3	98.558	296.47	124.281	107.262	1081.503	79.946	1
Lyn-GFP	EcadmCh	h17	c3	h17c3	4	98.558	255.183	102.811	105.89	1327.364	79.946	1
Lyn-GFP	EcadmCh	h17	c3	h17c3	5	98.558	242.665	88.748	109.511	903.492	79.946	1
Lyn-GFP	EcadmCh	h17	c3	h17c3	6	39.985	239.702	89.615	109.594	646.928	32.332	1
Lyn-GFP	EcadmCh	h17		h17								1
Lyn-GFP	EcadmCh	h17	c4	h17c4	1	67.219	329.318	132.094	111.01	977.058	54.464	1
Lyn-GFP	EcadmCh	h17	c4	h17c4	2	66.57	305.797	108.945	112.268	948.573	53.942	1
Lyn-GFP	EcadmCh	h17	c4	h17c4	3	66.57	284.774	103.71	109.367	774.895	53.942	1
Lyn-GFP	EcadmCh	h17	c4	h17c4	4	68.299	278.069	95.437	113.823	729.719	55.342	1
Lyn-GFP	EcadmCh	h17	c4	h17c4	5	68.299	247.741	81.533	110.845	692.545	55.342	1
Lyn-GFP	EcadmCh	h17	c4	h17c4	6	68.299	234.233	71.332	108.865	610.427	55.342	1
