# Supplementary material for: Stepwise polarisation of developing bilayered epidermis is mediated by aPKC and E-cadherin in zebrafish
Source: eLife. 2020 Jan 22;9:e49064. doi: 10.7554/eLife.49064 (PMC6975926; doi:10.7554/eLife.49064)
Supplement: Figure 1—source data 1. — In this source dataset and all the remaining datasets, the coloumn 'mean' corresponds to the mean fluorescence intensities. [file elife-49064-fig1-data1.csv]

Genotype	Cell name	Area	Mean	Length	Boundary
24 hpf	h10c1	48.901	89.664	79.436	Non	Genotype= Stage for this data
24 hpf	h10c1	48.901	101.018	79.436	Non
24 hpf	h10c1	48.901	111.246	79.436	Non
24 hpf	h10c1	48.901	120.478	79.436	Non
24 hpf	h10c1	48.901	127.247	79.436	Non
24 hpf	h10c1	48.901	131.235	79.436	Non
24 hpf	h10c1	48.09	149.309	78.12	Non
24 hpf	h10c1	48.09	157.777	78.12	Non
24 hpf	h10c1	48.09	162.122	78.12	Non
24 hpf	h10c1	48.09	166.258	78.12	Non
24 hpf	h10c1	48.09	175.96	78.12	Non
24 hpf	h10c1	48.09	187.739	78.12	Non
24 hpf	h10c1	48.09	199.392	78.12	Non
24 hpf	h10c1	48.09	203.8	78.12	Non
24 hpf	h10c2	77.323	87.084	125.629	Non
24 hpf	h10c2	77.323	99.396	125.629	Non
24 hpf	h10c2	77.323	111.074	125.629	Non
24 hpf	h10c2	77.323	120.094	125.629	Non
24 hpf	h10c2	76.242	146.685	123.879	Non
24 hpf	h10c2	76.242	156.282	123.879	Non
24 hpf	h10c2	76.242	168.23	123.879	Non
24 hpf	h10c2	76.242	180.511	123.879	Non
24 hpf	h10c2	76.242	186.591	123.879	Non
24 hpf	h10c2	71.055	194.799	115.469	Non
24 hpf	h10c2	71.055	198.33	115.469	Non
24 hpf	h10c2	71.055	195.326	115.469	Non
24 hpf	h10c2	71.055	189.076	115.469	Non
24 hpf	h10c2	71.055	182.095	115.469	Non
24 hpf	h10c2	71.055	176.774	115.469	Non
24 hpf	h11c1	36.311	144.177	58.952	Non
24 hpf	h11c1	36.311	162.408	58.952	Non
24 hpf	h11c1	36.311	176.959	58.952	Non
24 hpf	h11c1	36.311	194.119	58.952	Non
24 hpf	h11c1	37.932	247.785	61.606	Non
24 hpf	h11c1	37.932	275.905	61.606	Non
24 hpf	h11c1	37.932	292.7	61.606	Non
24 hpf	h11c1	37.932	303.841	61.606	Non
24 hpf	h11c1	37.932	305.655	61.606	Non
24 hpf	h11c1	37.932	292.264	61.606	Non
24 hpf	h11c1	37.932	270.48	61.606	Non
24 hpf	h11c2	56.466	125.172	91.727	Non
24 hpf	h11c2	56.466	141.76	91.727	Non
24 hpf	h11c2	56.466	152.455	91.727	Non
24 hpf	h11c2	56.466	158.166	91.727	Non
24 hpf	h11c2	56.466	166.992	91.727	Non
24 hpf	h11c2	53.062	244.647	86.204	Non
24 hpf	h11c2	53.062	251.808	86.204	Non
24 hpf	h11c2	53.062	250.532	86.204	Non
24 hpf	h11c2	53.062	243.558	86.204	Non
24 hpf	h11c2	53.062	232.498	86.204	Non
24 hpf	h11c2	53.062	224.499	86.204	Non
24 hpf	h11c3	52.575	125.822	85.394	Non
24 hpf	h11c3	52.575	131.12	85.394	Non
24 hpf	h11c3	52.575	134.73	85.394	Non
24 hpf	h11c3	52.575	143.316	85.394	Non
24 hpf	h11c3	50.144	226.141	81.461	Non
24 hpf	h11c3	50.144	243.334	81.461	Non
24 hpf	h11c3	50.144	249.255	81.461	Non
24 hpf	h11c3	50.144	249.075	81.461	Non
24 hpf	h11c3	50.144	239.657	81.461	Non
24 hpf	h11c3	50.144	216.256	81.461	Non
24 hpf	h11c3	50.144	196.448	81.461	Non
24 hpf	h12c1	67.759	96.572	110.114	Non
24 hpf	h12c1	67.759	105.619	110.114	Non
24 hpf	h12c1	67.759	114.759	110.114	Non
24 hpf	h12c1	67.759	125.372	110.114	Non
24 hpf	h12c1	67.759	138.105	110.114	Non
24 hpf	h12c1	67.759	156.814	110.114	Non
24 hpf	h12c1	67.759	175.176	110.114	Non
24 hpf	h12c1	67.759	188.937	110.114	Non
24 hpf	h12c1	63.328	238.047	102.89	Non
24 hpf	h12c1	63.328	232.705	102.89	Non
24 hpf	h12c1	63.328	213.958	102.89	Non
24 hpf	h12c1	63.328	200.625	102.89	Non
24 hpf	h12c1	63.328	188.201	102.89	Non
24 hpf	h12c1	63.328	175.404	102.89	Non
24 hpf	h12c2	65.76	111.858	106.83	Non
24 hpf	h12c2	65.76	119.204	106.83	Non
24 hpf	h12c2	65.76	128.872	106.83	Non
24 hpf	h12c2	65.76	139.384	106.83	Non
24 hpf	h12c2	65.76	148.06	106.83	Non
24 hpf	h12c2	65.76	156.627	106.83	Non
24 hpf	h12c2	65.868	169.681	107.036	Non
24 hpf	h12c2	65.868	172.702	107.036	Non
24 hpf	h12c2	65.868	171.986	107.036	Non
24 hpf	h12c2	65.868	169.617	107.036	Non
24 hpf	h12c3	40.526	104.699	65.803	Non
24 hpf	h12c3	40.526	114.778	65.803	Non
24 hpf	h12c3	40.526	125.808	65.803	Non
24 hpf	h12c3	40.526	138.596	65.803	Non
24 hpf	h12c3	40.526	149.676	65.803	Non
24 hpf	h12c3	42.525	183.31	69.074	Non
24 hpf	h12c3	42.525	197.155	69.074	Non
24 hpf	h12c3	42.525	204.744	69.074	Non
24 hpf	h12c3	42.525	208.069	69.074	Non
24 hpf	h12c3	42.525	203.23	69.074	Non
24 hpf	h12c3	42.525	193.232	69.074	Non
24 hpf	h12c3	42.525	182.014	69.074	Non
24 hpf	h13c1	58.411	104.938	94.89	Non
24 hpf	h13c1	58.411	109.72	94.89	Non
24 hpf	h13c1	58.411	119.875	94.89	Non
24 hpf	h13c1	58.411	135.785	94.89	Non
24 hpf	h13c1	58.411	151.374	94.89	Non
24 hpf	h13c1	58.195	169.309	94.534	Non
24 hpf	h13c1	58.195	183.453	94.534	Non
24 hpf	h13c1	58.195	196.037	94.534	Non
24 hpf	h13c1	58.195	200.333	94.534	Non
24 hpf	h13c1	58.195	198.344	94.534	Non
24 hpf	h13c1	55.709	212.926	90.496	Non
24 hpf	h13c1	55.709	226.374	90.496	Non
24 hpf	h13c1	55.709	230.957	90.496	Non
24 hpf	h13c1	55.709	230.049	90.496	Non
24 hpf	h13c1	55.709	221.266	90.496	Non
24 hpf	h13c1	55.709	206.203	90.496	Non
24 hpf	h13c1	55.709	188.863	90.496	Non
24 hpf	h13c1	55.709	175.18	90.496	Non
24 hpf	h13c2	47.604	106.712	77.324	Non
24 hpf	h13c2	47.604	112.428	77.324	Non
24 hpf	h13c2	47.604	122.016	77.324	Non
24 hpf	h13c2	47.604	133.316	77.324	Non
24 hpf	h13c2	47.604	145.149	77.324	Non
24 hpf	h13c2	47.604	155.53	77.324	Non
24 hpf	h13c2	47.604	170.921	77.324	Non
24 hpf	h13c2	47.604	188.351	77.324	Non
24 hpf	h13c2	47.604	199.273	77.324	Non
24 hpf	h13c2	47.604	201.276	77.324	Non
24 hpf	h13c2	47.604	201.62	77.324	Non
24 hpf	h13c2	48.09	243.178	78.111	Non
24 hpf	h13c2	48.09	252.83	78.111	Non
24 hpf	h13c2	48.09	255.933	78.111	Non
24 hpf	h13c2	48.09	247.8	78.111	Non
24 hpf	h13c2	48.09	229.715	78.111	Non
24 hpf	h13c3	35.122	99.469	57.034	Non
24 hpf	h13c3	35.122	106.296	57.034	Non
24 hpf	h13c3	47.28	129.24	76.785	Non
24 hpf	h13c3	47.28	144.693	76.785	Non
24 hpf	h13c3	47.28	159.212	76.785	Non
24 hpf	h13c3	47.28	180.613	76.785	Non
24 hpf	h13c3	47.28	208.535	76.785	Non
24 hpf	h13c3	47.28	232.327	76.785	Non
24 hpf	h13c3	47.28	242.881	76.785	Non
24 hpf	h13c3	47.28	244.551	76.785	Non
24 hpf	h13c3	47.28	235.519	76.785	Non
24 hpf	h13c3	46.307	211.29	75.218	Non
24 hpf	h13c3	46.307	202.227	75.218	Non
24 hpf	h13c3	46.307	191.808	75.218	Non
24 hpf	h13c3	46.307	181.181	75.218	Non
24 hpf	h13c3	46.307	170.366	75.218	Non
24 hpf	h13c3	46.307	164.814	75.218	Non
24 hpf	h14c1	36.473	116.151	59.217	Non
24 hpf	h14c1	36.473	135.18	59.217	Non
24 hpf	h14c1	36.473	152.404	59.217	Non
24 hpf	h14c1	36.473	166.818	59.217	Non
24 hpf	h14c1	36.473	186.607	59.217	Non
24 hpf	h14c1	36.473	211.911	59.217	Non
24 hpf	h14c1	36.473	238.693	59.217	Non
24 hpf	h14c1	36.473	259.456	59.217	Non
24 hpf	h14c1	36.473	279.556	59.217	Non
24 hpf	h14c1	36.635	302.322	59.487	Non
24 hpf	h14c1	36.635	308.211	59.487	Non
24 hpf	h14c1	36.635	303.156	59.487	Non
24 hpf	h14c2	57.871	116.198	94.001	Non
24 hpf	h14c2	57.871	129.404	94.001	Non
24 hpf	h14c2	57.871	143.925	94.001	Non
24 hpf	h14c2	57.871	156.602	94.001	Non
24 hpf	h14c2	57.871	166.656	94.001	Non
24 hpf	h14c2	57.709	199.149	93.745	Non
24 hpf	h14c2	57.709	212.618	93.745	Non
24 hpf	h14c2	57.709	219.575	93.745	Non
24 hpf	h14c2	57.709	223.793	93.745	Non
24 hpf	h14c2	57.709	228.322	93.745	Non
24 hpf	h14c2	57.709	231.511	93.745	Non
24 hpf	h14c3	45.281	111.107	73.535	Non
24 hpf	h14c3	45.281	120.945	73.535	Non
24 hpf	h14c3	45.281	133.175	73.535	Non
24 hpf	h14c3	45.281	148.268	73.535	Non
24 hpf	h14c3	45.281	163.146	73.535	Non
24 hpf	h14c3	45.281	182.865	73.535	Non
24 hpf	h14c3	42.579	226.244	69.142	Non
24 hpf	h14c3	42.579	235.136	69.142	Non
24 hpf	h14c3	42.579	236.391	69.142	Non
24 hpf	h14c3	42.579	231.779	69.142	Non
24 hpf	h14c3	42.579	220.096	69.142	Non
24 hpf	h14c3	42.579	206.57	69.142	Non
24 hpf	h14c3	42.579	196.05	69.142	Non
24 hpf	h15c1	49.009	100.545	79.607	Non
24 hpf	h15c1	49.009	109.817	79.607	Non
24 hpf	h15c1	49.009	122.67	79.607	Non
24 hpf	h15c1	49.009	136.065	79.607	Non
24 hpf	h15c1	49.009	143.972	79.607	Non
24 hpf	h15c1	49.009	152.382	79.607	Non
24 hpf	h15c1	46.632	198.459	75.734	Non
24 hpf	h15c1	46.632	218.174	75.734	Non
24 hpf	h15c1	46.632	225.859	75.734	Non
24 hpf	h15c1	46.632	223.941	75.734	Non
24 hpf	h15c1	46.632	216.06	75.734	Non
24 hpf	h15c1	46.632	207.004	75.734	Non
24 hpf	h15c1	46.632	196.498	75.734	Non
24 hpf	h15c2	51.495	116.021	83.647	Non
24 hpf	h15c2	51.495	130.037	83.647	Non
24 hpf	h15c2	51.495	141.066	83.647	Non
24 hpf	h15c2	51.495	149.915	83.647	Non
24 hpf	h15c2	51.495	165.078	83.647	Non
24 hpf	h15c2	51.819	192.074	84.175	Non
24 hpf	h15c2	51.819	216.399	84.175	Non
24 hpf	h15c2	51.819	226.618	84.175	Non
24 hpf	h15c2	53.17	257.192	86.372	Non
24 hpf	h15c2	53.17	246.705	86.372	Non
24 hpf	h15c2	53.17	230.603	86.372	Non
24 hpf	h15c2	53.17	217.41	86.372	Non
24 hpf	h15c3	58.951	117.229	95.788	Non
24 hpf	h15c3	58.951	133.42	95.788	Non
24 hpf	h15c3	58.951	153.327	95.788	Non
24 hpf	h15c3	58.951	170.041	95.788	Non
24 hpf	h15c3	58.951	183.312	95.788	Non
24 hpf	h15c3	58.951	196.81	95.788	Non
24 hpf	h15c3	58.951	215.412	95.788	Non
24 hpf	h15c3	57.276	259.562	93.059	Non
24 hpf	h15c3	57.276	266.21	93.059	Non
24 hpf	h15c3	57.276	261.018	93.059	Non
24 hpf	h15c3	57.276	249.904	93.059	Non
24 hpf	h15c3	57.276	227.976	93.059	Non
24 hpf	h15c3	57.276	201.252	93.059	Non
24 hpf	h16c1	39.661	98.515	64.41	Non
24 hpf	h16c1	39.661	100.8	64.41	Non
24 hpf	h16c1	39.661	103.519	64.41	Non
24 hpf	h16c1	39.661	108.362	64.41	Non
24 hpf	h16c1	39.661	113.341	64.41	Non
24 hpf	h16c1	39.661	116.856	64.41	Non
24 hpf	h16c1	39.661	119.889	64.41	Non
24 hpf	h16c1	39.661	123.094	64.41	Non
24 hpf	h16c1	39.661	125.767	64.41	Non
24 hpf	h16c1	39.661	127.442	64.41	Non
24 hpf	h16c1	39.661	128.819	64.41	Non
24 hpf	h16c1	39.661	130.366	64.41	Non
24 hpf	h16c1	35.825	151.919	58.168	Non
24 hpf	h16c1	35.825	155.052	58.168	Non
24 hpf	h16c1	35.825	156.075	58.168	Non
24 hpf	h16c1	35.825	157.299	58.168	Non
24 hpf	h16c1	35.825	156.311	58.168	Non
24 hpf	h16c1	35.825	156.317	58.168	Non
24 hpf	h16c1	35.825	156.059	58.168	Non
24 hpf	h16c1	35.825	154.481	58.168	Non
24 hpf	h16c1	35.825	152.245	58.168	Non
24 hpf	h16c2	46.199	98.736	75.03	Non
24 hpf	h16c2	46.199	102.796	75.03	Non
24 hpf	h16c2	46.199	108.266	75.03	Non
24 hpf	h16c2	46.199	115.315	75.03	Non
24 hpf	h16c2	46.199	122.596	75.03	Non
24 hpf	h16c2	46.199	129.981	75.03	Non
24 hpf	h16c2	46.199	135.117	75.03	Non
24 hpf	h16c2	46.199	138.866	75.03	Non
24 hpf	h16c2	46.199	143.925	75.03	Non
24 hpf	h16c2	46.199	148.041	75.03	Non
24 hpf	h16c2	46.199	148.278	75.03	Non
24 hpf	h16c2	46.199	148.853	75.03	Non
24 hpf	h16c2	46.199	148.073	75.03	Non
24 hpf	h16c3	49.387	92.009	80.223	Non
24 hpf	h16c3	49.387	95.058	80.223	Non
24 hpf	h16c3	49.387	98.876	80.223	Non
24 hpf	h16c3	49.766	106.974	80.819	Non
24 hpf	h16c3	49.766	113.341	80.819	Non
24 hpf	h16c3	49.766	119.879	80.819	Non
24 hpf	h16c3	49.766	125.803	80.819	Non
24 hpf	h16c3	49.766	129.879	80.819	Non
24 hpf	h16c3	49.766	135.081	80.819	Non
24 hpf	h16c3	49.766	140.081	80.819	Non
24 hpf	h16c3	49.766	146.154	80.819	Non
24 hpf	h16c3	49.766	148.771	80.819	Non
24 hpf	h16c3	49.766	150.402	80.819	Non
24 hpf	h16c3	42.147	152.981	68.451	Non
24 hpf	h16c3	42.147	152.566	68.451	Non
24 hpf	h16c3	42.147	149.184	68.451	Non
24 hpf	h16c3	42.147	146.89	68.451	Non
24 hpf	h16c4	45.227	98.955	73.465	Non
24 hpf	h16c4	45.227	104.04	73.465	Non
24 hpf	h16c4	45.227	109.828	73.465	Non
24 hpf	h16c4	46.253	115.836	75.133	Non
24 hpf	h16c4	46.253	119.791	75.133	Non
24 hpf	h16c4	46.253	124.947	75.133	Non
24 hpf	h16c4	46.253	130.754	75.133	Non
24 hpf	h16c4	46.253	134.561	75.133	Non
24 hpf	h16c4	46.253	137.736	75.133	Non
24 hpf	h16c4	46.253	138.668	75.133	Non
24 hpf	h16c4	46.253	139.571	75.133	Non
24 hpf	h16c4	46.253	137.741	75.133	Non
24 hpf	h16c4	46.253	136.619	75.133	Non
24 hpf	h17c1	47.064	121.064	76.456	Non
24 hpf	h17c1	47.064	139.796	76.456	Non
24 hpf	h17c1	47.064	159.652	76.456	Non
24 hpf	h17c1	47.064	183.621	76.456	Non
24 hpf	h17c1	47.064	201.372	76.456	Non
24 hpf	h17c1	47.064	234.826	76.447	Non
24 hpf	h17c1	47.064	258.007	76.447	Non
24 hpf	h17c1	47.064	274.182	76.447	Non
24 hpf	h17c1	47.064	273.563	76.447	Non
24 hpf	h17c1	47.064	259.685	76.447	Non
24 hpf	h17c1	47.064	236.674	76.447	Non
24 hpf	h17c1	47.064	206.311	76.447	Non
24 hpf	h17c2	55.007	114.502	89.376	Non
24 hpf	h17c2	55.007	131.127	89.376	Non
24 hpf	h17c2	55.007	151.299	89.376	Non
24 hpf	h17c2	55.007	171.908	89.376	Non
24 hpf	h17c2	55.007	190.213	89.376	Non
24 hpf	h17c2	55.007	207.937	89.376	Non
24 hpf	h17c2	55.007	231.536	89.376	Non
24 hpf	h17c2	55.007	250.956	89.376	Non
24 hpf	h17c2	55.007	254.012	89.376	Non
24 hpf	h17c3	66.246	132.266	107.64	Non
24 hpf	h17c3	66.246	156.067	107.64	Non
24 hpf	h17c3	66.246	176.086	107.64	Non
24 hpf	h17c3	66.246	189.795	107.64	Non
24 hpf	h17c3	66.246	206.288	107.64	Non
24 hpf	h17c3	66.246	232.008	107.64	Non
24 hpf	h17c3	66.246	252.876	107.64	Non
24 hpf	h17c3	66.246	254.116	107.64	Non
24 hpf	h17c3	66.084	243.345	107.363	Non
24 hpf	h17c3	66.084	214.136	107.363	Non
24 hpf	h18c1	44.794	116.974	72.766	Non
24 hpf	h18c1	44.794	141.117	72.766	Non
24 hpf	h18c1	44.794	168.566	72.766	Non
24 hpf	h18c1	44.794	184.599	72.766	Non
24 hpf	h18c1	44.794	200.304	72.766	Non
24 hpf	h18c1	44.416	219.679	72.131	Non
24 hpf	h18c1	44.416	259.751	72.131	Non
24 hpf	h18c1	44.416	280.513	72.131	Non
24 hpf	h18c1	44.416	287.568	72.131	Non
24 hpf	h18c1	44.416	276.404	72.131	Non
24 hpf	h18c1	44.416	250.978	72.131	Non
24 hpf	h18c2	61.167	124.84	99.4	Non
24 hpf	h18c2	61.167	143.142	99.4	Non
24 hpf	h18c2	61.167	151.865	99.4	Non
24 hpf	h18c2	61.167	158.229	99.4	Non
24 hpf	h18c2	61.167	168.557	99.4	Non
24 hpf	h18c2	61.167	185.408	99.4	Non
24 hpf	h18c2	57.979	240.691	94.186	Non
24 hpf	h18c2	57.979	242.525	94.186	Non
24 hpf	h18c2	57.979	228.734	94.186	Non
24 hpf	h18c2	57.979	206.171	94.186	Non
24 hpf	h18c2	57.979	184.498	94.186	Non
24 hpf	h18c2	57.979	172.224	94.186	Non
24 hpf	h18c3	49.117	134.492	79.787	Non
24 hpf	h18c3	49.117	150.911	79.787	Non
24 hpf	h18c3	49.117	163.551	79.787	Non
24 hpf	h18c3	49.117	181.659	79.787	Non
24 hpf	h18c3	49.117	211.74	79.787	Non
24 hpf	h18c3	49.117	239.375	79.787	Non
24 hpf	h18c3	49.117	254.092	79.787	Non
24 hpf	h18c3	49.117	254.092	79.787	Non
24 hpf	h18c3	49.117	251.655	79.787	Non
24 hpf	h18c3	49.387	246.378	80.213	Non
24 hpf	h18c3	49.387	223.905	80.213	Non
24 hpf	h19c1	62.464	101.772	101.488	Non
24 hpf	h19c1	62.464	108.763	101.488	Non
24 hpf	h19c1	62.464	117.941	101.488	Non
24 hpf	h19c1	62.464	128.175	101.488	Non
24 hpf	h19c1	62.464	137.994	101.488	Non
24 hpf	h19c1	62.464	145.731	101.488	Non
24 hpf	h19c1	62.464	156.872	101.488	Non
24 hpf	h19c1	62.464	172.385	101.488	Non
24 hpf	h19c1	62.95	207.998	102.279	Non
24 hpf	h19c1	62.95	211.691	102.279	Non
24 hpf	h19c1	62.95	210.536	102.279	Non
24 hpf	h19c1	62.95	207.56	102.279	Non
24 hpf	h19c1	62.95	202.145	102.279	Non
24 hpf	h19c1	62.95	194.376	102.279	Non
24 hpf	h19c2	60.086	124.172	97.631	Non
24 hpf	h19c2	60.086	136.896	97.631	Non
24 hpf	h19c2	60.086	153.734	97.631	Non
24 hpf	h19c2	60.086	171.072	97.631	Non
24 hpf	h19c2	60.086	190.292	97.631	Non
24 hpf	h19c2	61.923	239.884	100.585	Non
24 hpf	h19c2	61.923	258.6	100.585	Non
24 hpf	h19c2	61.923	261.928	100.585	Non
24 hpf	h19c2	61.923	260.147	100.585	Non
24 hpf	h19c2	61.923	251.601	100.585	Non
24 hpf	h19c2	61.923	241.939	100.585	Non
24 hpf	h19c2	61.923	225.978	100.585	Non
24 hpf	h19c3	43.119	128.949	70.027	Non
24 hpf	h19c3	43.119	140.044	70.027	Non
24 hpf	h19c3	43.119	155.934	70.027	Non
24 hpf	h19c3	43.119	187.188	70.027	Non
24 hpf	h19c3	43.119	217.21	70.027	Non
24 hpf	h19c3	43.119	234.678	70.027	Non
24 hpf	h19c3	44.524	232.084	72.322	Non
24 hpf	h19c3	44.524	218.268	72.322	Non
24 hpf	h19c3	44.524	203.194	72.322	Non
24 hpf	h1c1	40.526	73.221	65.802	Non
24 hpf	h1c1	40.526	78.358	65.802	Non
24 hpf	h1c1	40.526	89.272	65.802	Non
24 hpf	h1c1	40.526	100.406	65.802	Non
24 hpf	h1c1	40.526	109.487	65.802	Non
24 hpf	h1c1	40.201	130.695	65.28	Non
24 hpf	h1c1	40.201	139.391	65.28	Non
24 hpf	h1c1	40.201	149.671	65.28	Non
24 hpf	h1c1	40.201	161.883	65.28	Non
24 hpf	h1c1	41.012	176.068	66.599	Non
24 hpf	h1c1	41.012	196.348	66.599	Non
24 hpf	h1c1	41.012	209.013	66.599	Non
24 hpf	h1c1	41.012	215.476	66.599	Non
24 hpf	h1c1	41.012	222.596	66.599	Non
24 hpf	h1c1	41.012	222.734	66.599	Non
24 hpf	h1c1	41.012	227.041	66.599	Non
24 hpf	h1c1	41.012	233.565	66.599	Non
24 hpf	h1c2	51.441	81.581	83.55	Non
24 hpf	h1c2	51.441	92.307	83.55	Non
24 hpf	h1c2	51.441	111.105	83.55	Non
24 hpf	h1c2	51.441	129.107	83.55	Non
24 hpf	h1c2	51.441	137.261	83.55	Non
24 hpf	h1c2	51.441	142.005	83.55	Non
24 hpf	h1c2	51.441	146.061	83.55	Non
24 hpf	h1c2	51.441	159.07	83.55	Non
24 hpf	h1c2	51.441	174.697	83.55	Non
24 hpf	h1c2	49.711	198.756	80.758	Non
24 hpf	h1c2	49.711	224.156	80.758	Non
24 hpf	h1c2	49.711	247.65	80.758	Non
24 hpf	h1c2	49.711	259.379	80.758	Non
24 hpf	h1c2	49.711	271.18	80.758	Non
24 hpf	h1c2	49.711	278.126	80.758	Non
24 hpf	h1c3	51.224	91.964	83.22	Non
24 hpf	h1c3	51.224	112.305	83.22	Non
24 hpf	h1c3	51.224	148.071	83.22	Non
24 hpf	h1c3	51.224	176.518	83.22	Non
24 hpf	h1c3	51.116	196.642	83.029	Non
24 hpf	h1c3	51.116	200.553	83.029	Non
24 hpf	h1c3	51.116	209.855	83.029	Non
24 hpf	h1c3	51.116	232.611	83.029	Non
24 hpf	h1c3	51.116	257.572	83.029	Non
24 hpf	h1c3	49.495	291.79	80.402	Non
24 hpf	h1c3	49.495	317.602	80.402	Non
24 hpf	h1c3	49.495	329.276	80.402	Non
24 hpf	h1c3	49.495	326.546	80.402	Non
24 hpf	h1c3	49.495	321.6	80.402	Non
24 hpf	h1c3	53.116	274.916	86.278	Non
24 hpf	h1c3	53.116	249.894	86.278	Non
24 hpf	h1c3	53.116	209.003	86.278	Non
24 hpf	h20c1	51.495	119.208	83.653	Non
24 hpf	h20c1	51.495	133.037	83.653	Non
24 hpf	h20c1	51.495	144.416	83.653	Non
24 hpf	h20c1	51.495	155.425	83.653	Non
24 hpf	h20c1	51.495	171.418	83.653	Non
24 hpf	h20c1	52.143	244.32	84.704	Non
24 hpf	h20c1	52.143	255.581	84.704	Non
24 hpf	h20c1	52.143	245.968	84.704	Non
24 hpf	h20c1	52.143	233.139	84.704	Non
24 hpf	h20c1	52.143	215.545	84.704	Non
24 hpf	h20c1	52.143	195.944	84.704	Non
24 hpf	h20c1	52.143	172.332	84.704	Non
24 hpf	h20c2	46.686	131.611	75.823	Non
24 hpf	h20c2	46.686	147.791	75.823	Non
24 hpf	h20c2	46.686	169.293	75.823	Non
24 hpf	h20c2	46.686	188.381	75.823	Non
24 hpf	h20c2	47.442	206.103	77.059	Non
24 hpf	h20c2	47.442	227.491	77.059	Non
24 hpf	h20c2	47.442	245.47	77.059	Non
24 hpf	h20c2	47.442	256.991	77.059	Non
24 hpf	h20c2	47.442	260.958	77.059	Non
24 hpf	h20c2	47.442	257.295	77.059	Non
24 hpf	h20c3	54.953	123.07	89.269	Non
24 hpf	h20c3	54.953	134.512	89.269	Non
24 hpf	h20c3	54.953	145.222	89.269	Non
24 hpf	h20c3	54.953	156.691	89.269	Non
24 hpf	h20c3	54.953	173.12	89.269	Non
24 hpf	h20c3	54.953	188.834	89.269	Non
24 hpf	h20c3	55.817	237.037	90.662	Non
24 hpf	h20c3	55.817	248.798	90.662	Non
24 hpf	h20c3	55.817	247.06	90.662	Non
24 hpf	h20c3	55.817	244.257	90.662	Non
24 hpf	h20c3	50.198	260.976	81.541	Non
24 hpf	h20c3	50.198	252.851	81.541	Non
24 hpf	h20c3	50.198	233.524	81.541	Non
24 hpf	h20c3	50.198	209	81.541	Non
24 hpf	h2c1	55.763	79.727	90.588	Non
24 hpf	h2c1	55.763	90.068	90.588	Non
24 hpf	h2c1	55.763	97.529	90.588	Non
24 hpf	h2c1	55.763	106.562	90.588	Non
24 hpf	h2c1	55.763	118.434	90.588	Non
24 hpf	h2c1	55.763	131.224	90.588	Non
24 hpf	h2c1	55.763	137.979	90.588	Non
24 hpf	h2c1	55.763	148.158	90.588	Non
24 hpf	h2c1	55.763	163.193	90.588	Non
24 hpf	h2c1	55.763	187.179	90.588	Non
24 hpf	h2c1	57.33	204.462	93.13	Non
24 hpf	h2c1	57.33	214.698	93.13	Non
24 hpf	h2c1	57.33	223.882	93.13	Non
24 hpf	h2c1	57.33	231.482	93.13	Non
24 hpf	h2c1	57.33	231.506	93.13	Non
24 hpf	h2c2	65.543	79.479	106.495	Non
24 hpf	h2c2	65.543	87.915	106.495	Non
24 hpf	h2c2	65.543	98.71	106.495	Non
24 hpf	h2c2	65.543	104.377	106.495	Non
24 hpf	h2c2	65.543	112.995	106.486	Non
24 hpf	h2c2	65.543	123.033	106.486	Non
24 hpf	h2c2	65.543	128.773	106.486	Non
24 hpf	h2c2	65.543	141.524	106.486	Non
24 hpf	h2c2	65.003	166.116	105.62	Non
24 hpf	h2c2	65.003	185.707	105.62	Non
24 hpf	h2c2	65.003	195.125	105.62	Non
24 hpf	h2c2	65.003	202.689	105.62	Non
24 hpf	h2c2	65.003	217.639	105.62	Non
24 hpf	h2c2	61.707	185.86	100.251	Non
24 hpf	h2c2	61.707	191.266	100.251	Non
24 hpf	h2c2	61.707	193.34	100.251	Non
24 hpf	h2c3	36.257	74.168	58.871	Non
24 hpf	h2c3	36.095	84.978	58.603	Non
24 hpf	h2c3	36.095	90.915	58.603	Non
24 hpf	h2c3	36.095	101.048	58.603	Non
24 hpf	h2c3	36.095	115.791	58.603	Non
24 hpf	h2c3	36.095	133.791	58.603	Non
24 hpf	h2c3	36.527	138.719	59.313	Non
24 hpf	h2c3	36.527	143.285	59.313	Non
24 hpf	h2c3	36.527	151.233	59.313	Non
24 hpf	h2c3	36.527	163.909	59.313	Non
24 hpf	h2c3	36.527	168.753	59.313	Non
24 hpf	h2c3	36.527	170.794	59.313	Non
24 hpf	h2c3	36.527	171.132	59.313	Non
24 hpf	h2c3	35.879	187.906	58.251	Non
24 hpf	h2c3	35.879	199.888	58.251	Non
24 hpf	h2c3	35.879	209.614	58.251	Non
24 hpf	h2c3	35.879	205.322	58.251	Non
24 hpf	h3c1	48.793	85.124	79.25	Non
24 hpf	h3c1	48.793	102.446	79.25	Non
24 hpf	h3c1	48.793	120.033	79.25	Non
24 hpf	h3c1	48.793	128.081	79.25	Non
24 hpf	h3c1	49.333	138.105	80.125	Non
24 hpf	h3c1	49.333	146.533	80.125	Non
24 hpf	h3c1	49.333	154.155	80.125	Non
24 hpf	h3c1	49.333	164.641	80.125	Non
24 hpf	h3c1	49.063	204.353	79.695	Non
24 hpf	h3c1	49.063	211.241	79.695	Non
24 hpf	h3c1	49.063	218.934	79.695	Non
24 hpf	h3c1	50.09	237.052	81.374	Non
24 hpf	h3c1	50.09	237.268	81.374	Non
24 hpf	h3c1	50.09	231.999	81.374	Non
24 hpf	h3c1	50.09	226.337	81.374	Non
24 hpf	h3c1	50.09	225.948	81.374	Non
24 hpf	h3c2	31.286	88.16	50.791	Non
24 hpf	h3c2	31.124	109.333	50.515	Non
24 hpf	h3c2	31.124	122.804	50.515	Non
24 hpf	h3c2	31.124	134.733	50.515	Non
24 hpf	h3c2	31.124	149.226	50.515	Non
24 hpf	h3c2	31.124	162.426	50.515	Non
24 hpf	h3c2	53.224	123.109	86.467	Non
24 hpf	h3c2	53.224	132.864	86.467	Non
24 hpf	h3c2	53.224	145.424	86.467	Non
24 hpf	h3c2	53.224	152.117	86.467	Non
24 hpf	h3c2	53.224	155.019	86.467	Non
24 hpf	h3c2	53.224	154.579	86.467	Non
24 hpf	h3c2	53.224	153.996	86.467	Non
24 hpf	h3c2	53.224	155.375	86.467	Non
24 hpf	h3c2	53.44	176.142	86.813	Non
24 hpf	h3c2	53.44	175.666	86.813	Non
24 hpf	h3c2	53.44	175.817	86.813	Non
24 hpf	h3c2	53.44	175.191	86.813	Non
24 hpf	h3c2	53.44	171.108	86.813	Non
24 hpf	h3c2	53.44	167.978	86.813	Non
24 hpf	h3c2	53.44	162.885	86.813	Non
24 hpf	h4c1	50.198	104.382	81.553	Non
24 hpf	h4c1	50.198	132.415	81.553	Non
24 hpf	h4c1	50.198	151.205	81.553	Non
24 hpf	h4c1	50.198	168.167	81.553	Non
24 hpf	h4c1	51.603	191.91	83.835	Non
24 hpf	h4c1	51.603	218.083	83.835	Non
24 hpf	h4c1	51.603	240.068	83.835	Non
24 hpf	h4c1	51.603	246.965	83.835	Non
24 hpf	h4c1	53.062	269.104	86.192	Non
24 hpf	h4c1	53.062	291.827	86.192	Non
24 hpf	h4c1	53.062	296.896	86.192	Non
24 hpf	h4c1	53.062	299.795	86.192	Non
24 hpf	h4c2	63.868	128.085	103.786	Non
24 hpf	h4c2	63.868	144.963	103.786	Non
24 hpf	h4c2	63.868	167.774	103.786	Non
24 hpf	h4c2	63.868	192.576	103.786	Non
24 hpf	h4c2	63.868	213.616	103.786	Non
24 hpf	h4c2	63.49	247.853	103.153	Non
24 hpf	h4c2	63.49	257.015	103.153	Non
24 hpf	h4c2	63.49	260.389	103.153	Non
24 hpf	h4c2	63.49	258.758	103.153	Non
24 hpf	h4c2	64.787	244.987	105.272	Non
24 hpf	h4c2	64.787	245.628	105.272	Non
24 hpf	h4c2	64.787	245.59	105.272	Non
24 hpf	h4c2	64.787	240.559	105.272	Non
24 hpf	h4c2	64.787	231.414	105.272	Non
24 hpf	h5c1	59.546	85.196	96.731	Non
24 hpf	h5c1	59.546	101.396	96.731	Non
24 hpf	h5c1	59.546	118.174	96.731	Non
24 hpf	h5c1	59.546	131.168	96.731	Non
24 hpf	h5c1	59.546	147.638	96.731	Non
24 hpf	h5c1	59.546	170.42	96.731	Non
24 hpf	h5c1	59.492	184.436	96.654	Non
24 hpf	h5c1	59.492	210.333	96.654	Non
24 hpf	h5c1	59.492	227.636	96.654	Non
24 hpf	h5c1	58.303	249.897	94.716	Non
24 hpf	h5c1	58.303	257.004	94.716	Non
24 hpf	h5c1	58.303	265.266	94.716	Non
24 hpf	h5c1	58.303	269.327	94.716	Non
24 hpf	h5c2	52.305	104.68	84.942	Non
24 hpf	h5c2	52.305	129.635	84.942	Non
24 hpf	h5c2	52.305	143.099	84.942	Non
24 hpf	h5c2	52.305	148.831	84.942	Non
24 hpf	h5c2	53.71	170.765	87.257	Non
24 hpf	h5c2	53.71	191.619	87.257	Non
24 hpf	h5c2	53.71	208.002	87.257	Non
24 hpf	h5c2	53.71	217.531	87.257	Non
24 hpf	h5c2	53.71	234.338	87.238	Non
24 hpf	h5c2	53.71	251.732	87.238	Non
24 hpf	h5c2	53.71	257.391	87.238	Non
24 hpf	h5c2	53.71	254.183	87.238	Non
24 hpf	h5c3	30.097	101.636	48.86	Non
24 hpf	h5c3	30.097	123.135	48.86	Non
24 hpf	h5c3	30.097	134.282	48.86	Non
24 hpf	h5c3	30.097	142.631	48.86	Non
24 hpf	h5c3	30.097	153.594	48.86	Non
24 hpf	h5c3	32.745	192.781	53.16	Non
24 hpf	h5c3	32.745	210.598	53.16	Non
24 hpf	h5c3	32.745	219.305	53.16	Non
24 hpf	h5c3	33.069	247.921	53.683	Non
24 hpf	h5c3	33.069	263.288	53.683	Non
24 hpf	h5c3	33.069	255.452	53.683	Non
24 hpf	h5c3	33.069	240.928	53.683	Non
24 hpf	h5c3	33.069	226.268	53.683	Non
24 hpf	h5c3	33.069	212.63	53.683	Non
24 hpf	h5c4	54.25	131.303	88.13	Non
24 hpf	h5c4	54.25	141.254	88.13	Non
24 hpf	h5c4	54.25	146.287	88.13	Non
24 hpf	h5c4	54.25	154.263	88.13	Non
24 hpf	h5c4	54.25	167.839	88.13	Non
24 hpf	h5c4	53.764	226.072	87.336	Non
24 hpf	h5c4	53.764	228.867	87.336	Non
24 hpf	h5c4	53.764	227.225	87.336	Non
24 hpf	h5c4	53.764	224.463	87.336	Non
24 hpf	h5c4	50.036	239.741	81.279	Non
24 hpf	h5c4	50.036	243.563	81.279	Non
24 hpf	h5c4	50.036	234.554	81.279	Non
24 hpf	h5c4	50.036	223.835	81.279	Non
24 hpf	h5c4	50.036	214.336	81.279	Non
24 hpf	h5c4	50.036	204.773	81.279	Non
24 hpf	h6c1	73.162	74.75	118.876	Non
24 hpf	h6c1	73.162	84.023	118.876	Non
24 hpf	h6c1	73.162	96.693	118.876	Non
24 hpf	h6c1	73.162	107.954	118.876	Non
24 hpf	h6c1	73.162	117.149	118.876	Non
24 hpf	h6c1	73.162	127.344	118.876	Non
24 hpf	h6c1	73.162	140.802	118.876	Non
24 hpf	h6c1	73.162	159.803	118.876	Non
24 hpf	h6c2	70.623	116.644	114.746	Non
24 hpf	h6c2	70.623	138.849	114.746	Non
24 hpf	h6c2	70.623	156.398	114.746	Non
24 hpf	h6c2	70.623	170.763	114.746	Non
24 hpf	h6c2	71.001	187.218	115.368	Non
24 hpf	h6c2	71.001	208.487	115.368	Non
24 hpf	h6c2	71.001	227.469	115.368	Non
24 hpf	h6c2	71.001	238.675	115.368	Non
24 hpf	h6c2	71.001	240.709	115.368	Non
24 hpf	h6c2	72.352	244.078	117.573	Non
24 hpf	h6c2	72.352	234.834	117.573	Non
24 hpf	h7c1	60.194	73.688	97.792	Non
24 hpf	h7c1	60.194	81.723	97.792	Non
24 hpf	h7c1	60.086	92.257	97.637	Non
24 hpf	h7c1	60.086	105.272	97.637	Non
24 hpf	h7c1	60.086	121.537	97.637	Non
24 hpf	h7c1	60.086	134.311	97.637	Non
24 hpf	h7c1	62.301	142.958	101.223	Non
24 hpf	h7c1	62.301	156.41	101.223	Non
24 hpf	h7c1	62.301	173.393	101.223	Non
24 hpf	h7c1	62.301	189.691	101.223	Non
24 hpf	h7c1	62.301	195.824	101.223	Non
24 hpf	h7c1	62.301	199.813	101.223	Non
24 hpf	h7c1	62.301	205.832	101.223	Non
24 hpf	h7c1	62.301	209.753	101.223	Non
24 hpf	h7c1	62.301	207.27	101.223	Non
24 hpf	h8c1	55.493	77.579	90.143	Non
24 hpf	h8c1	55.493	84.736	90.143	Non
24 hpf	h8c1	55.493	97.502	90.143	Non
24 hpf	h8c1	55.277	122.766	89.79	Non
24 hpf	h8c1	55.277	145.976	89.79	Non
24 hpf	h8c1	55.277	160.237	89.79	Non
24 hpf	h8c1	55.277	175.592	89.79	Non
24 hpf	h8c1	55.277	193.637	89.79	Non
24 hpf	h8c1	55.277	208.623	89.79	Non
24 hpf	h8c1	56.844	223.068	92.349	Non
24 hpf	h8c1	56.844	232.735	92.349	Non
24 hpf	h8c1	56.844	239.841	92.349	Non
24 hpf	h8c1	59.546	238.23	96.754	Non
24 hpf	h8c1	59.546	241.397	96.754	Non
24 hpf	h8c2	32.529	96.383	52.812	Non
24 hpf	h8c2	32.529	106.656	52.812	Non
24 hpf	h8c2	32.529	121.467	52.812	Non
24 hpf	h8c2	32.529	136.075	52.812	Non
24 hpf	h8c2	32.529	143.635	52.812	Non
24 hpf	h8c2	32.529	151.417	52.812	Non
24 hpf	h8c2	32.042	192.229	52.02	Non
24 hpf	h8c2	32.042	219.905	52.02	Non
24 hpf	h8c2	32.042	237.517	52.02	Non
24 hpf	h8c2	31.286	273.831	50.785	Non
24 hpf	h8c2	31.286	279.418	50.785	Non
24 hpf	h8c2	31.286	282.16	50.785	Non
24 hpf	h8c2	31.286	283.039	50.785	Non
24 hpf	h8c2	31.286	281.359	50.785	Non
24 hpf	h8c3	41.606	88.41	67.566	Non
24 hpf	h8c3	41.606	101.139	67.566	Non
24 hpf	h8c3	41.606	118.892	67.566	Non
24 hpf	h8c3	41.606	133.538	67.566	Non
24 hpf	h8c3	41.877	159.2	68.006	Non
24 hpf	h8c3	41.877	174.924	68.006	Non
24 hpf	h8c3	41.877	194.769	68.006	Non
24 hpf	h8c3	41.877	211.347	68.006	Non
24 hpf	h8c3	41.877	217.41	68.006	Non
24 hpf	h8c3	41.877	219.69	68.006	Non
24 hpf	h8c3	42.039	232.349	68.264	Non
24 hpf	h8c3	42.039	224.401	68.264	Non
24 hpf	h8c3	42.039	215.004	68.264	Non
24 hpf	h8c3	42.039	205.502	68.264	Non
24 hpf	h9c1	51.17	85.02	83.113	Non
24 hpf	h9c1	51.17	93.55	83.113	Non
24 hpf	h9c1	51.17	105.755	83.113	Non
24 hpf	h9c1	51.17	120.332	83.113	Non
24 hpf	h9c1	51.17	131.242	83.131	Non
24 hpf	h9c1	51.17	141.119	83.131	Non
24 hpf	h9c1	51.17	152.895	83.131	Non
24 hpf	h9c1	51.17	166.793	83.131	Non
24 hpf	h9c1	51.17	182.589	83.131	Non
24 hpf	h9c1	51.17	191.145	83.131	Non
24 hpf	h9c1	51.17	194.335	83.131	Non
24 hpf	h9c1	51.17	193.432	83.131	Non
24 hpf	h9c2	60.734	81.86	98.668	Non
24 hpf	h9c2	60.734	90.745	98.668	Non
24 hpf	h9c2	60.734	102.331	98.668	Non
24 hpf	h9c2	60.734	116.876	98.668	Non
24 hpf	h9c2	60.734	127.111	98.668	Non
24 hpf	h9c2	60.734	135.099	98.668	Non
24 hpf	h9c2	60.734	145.975	98.668	Non
24 hpf	h9c2	61.005	178.08	99.115	Non
24 hpf	h9c2	61.005	183.81	99.115	Non
24 hpf	h9c2	61.005	187.553	99.115	Non
24 hpf	h9c2	61.005	183.608	99.115	Non
36 hpf	h10c1	55.331	121.891	89.891	Non
36 hpf	h10c1	55.331	136.861	89.891	Non
36 hpf	h10c1	55.331	154.494	89.891	Non
36 hpf	h10c1	55.331	166.404	89.891	Non
36 hpf	h10c1	55.331	173.527	89.891	Non
36 hpf	h10c1	55.331	181.059	89.891	Non
36 hpf	h10c1	55.331	188.184	89.891	Non
36 hpf	h10c1	55.331	194.741	89.891	Non
36 hpf	h10c1	55.331	193.315	89.891	Non
36 hpf	h10c2	50.738	114.796	82.409	Non
36 hpf	h10c2	50.738	125.006	82.409	Non
36 hpf	h10c2	50.738	142.346	82.409	Non
36 hpf	h10c2	50.738	158.991	82.409	Non
36 hpf	h10c2	50.738	170.404	82.409	Non
36 hpf	h10c2	51.549	195.371	83.735	Non
36 hpf	h10c2	51.549	205.28	83.735	Non
36 hpf	h10c2	51.549	208.644	83.735	Non
36 hpf	h10c2	51.549	201.557	83.735	Non
36 hpf	h10c2	51.549	190.351	83.735	Non
36 hpf	h10c3	51.441	133.354	83.581	Non
36 hpf	h10c3	51.441	156.598	83.581	Non
36 hpf	h10c3	51.441	177.425	83.581	Non
36 hpf	h10c3	51.441	196.956	83.581	Non
36 hpf	h10c3	51.441	217.13	83.581	Non
36 hpf	h10c3	51.441	229.077	83.581	Non
36 hpf	h10c3	51.441	232.812	83.581	Non
36 hpf	h10c3	51.441	235.79	83.581	Non
36 hpf	h10c4	62.355	123.196	101.301	Non
36 hpf	h10c4	62.355	143.437	101.301	Non
36 hpf	h10c4	62.355	161.759	101.301	Non
36 hpf	h10c4	62.355	181.16	101.301	Non
36 hpf	h10c4	62.355	200.88	101.301	Non
36 hpf	h10c4	62.355	216.664	101.301	Non
36 hpf	h10c4	62.355	222.582	101.301	Non
36 hpf	h10c4	62.355	223.655	101.301	Non
36 hpf	h10c4	62.355	215.773	101.301	Non
36 hpf	h11c1	55.439	103.738	90.064	Non
36 hpf	h11c1	55.439	115.099	90.064	Non
36 hpf	h11c1	55.439	131.255	90.064	Non
36 hpf	h11c1	55.439	141.853	90.064	Non
36 hpf	h11c1	55.439	155.986	90.064	Non
36 hpf	h11c1	55.439	175.748	90.064	Non
36 hpf	h11c1	55.439	196.118	90.064	Non
36 hpf	h11c1	55.439	211.576	90.064	Non
36 hpf	h11c1	55.439	224.491	90.064	Non
36 hpf	h11c1	55.439	247.978	90.064	Non
36 hpf	h11c2	52.413	129.602	85.133	Non
36 hpf	h11c2	52.413	151.537	85.133	Non
36 hpf	h11c2	52.413	172.345	85.133	Non
36 hpf	h11c2	52.413	183.652	85.133	Non
36 hpf	h11c2	52.413	197.844	85.133	Non
36 hpf	h11c2	52.413	216.462	85.133	Non
36 hpf	h11c2	52.413	229.363	85.133	Non
36 hpf	h11c2	52.413	231.678	85.133	Non
36 hpf	h11c2	52.413	229.918	85.133	Non
36 hpf	h11c2	52.413	221.081	85.133	Non
36 hpf	h11c3	56.628	113.943	91.991	Non
36 hpf	h11c3	56.628	124.517	91.991	Non
36 hpf	h11c3	56.628	135.209	91.991	Non
36 hpf	h11c3	56.628	144.353	91.991	Non
36 hpf	h11c3	56.628	155.659	91.991	Non
36 hpf	h11c3	56.628	169.892	91.991	Non
36 hpf	h11c3	57.276	183.907	93.04	Non
36 hpf	h11c3	57.276	192.904	93.04	Non
36 hpf	h11c3	57.276	199.886	93.04	Non
36 hpf	h11c3	57.276	207.001	93.04	Non
36 hpf	h11c4	50.954	122.791	82.779	Non
36 hpf	h11c4	50.954	140.504	82.779	Non
36 hpf	h11c4	50.954	157.637	82.779	Non
36 hpf	h11c4	50.954	172.399	82.779	Non
36 hpf	h11c4	50.954	189.509	82.779	Non
36 hpf	h11c4	50.954	207.697	82.779	Non
36 hpf	h11c4	50.954	226.07	82.779	Non
36 hpf	h11c4	50.954	232.131	82.779	Non
36 hpf	h11c4	50.954	236.17	82.779	Non
36 hpf	h12c1	44.2	123.566	71.794	Non
36 hpf	h12c1	44.2	146.004	71.794	Non
36 hpf	h12c1	44.2	164.995	71.794	Non
36 hpf	h12c1	44.2	182.617	71.794	Non
36 hpf	h12c1	44.2	192.186	71.794	Non
36 hpf	h12c1	44.2	199.287	71.794	Non
36 hpf	h12c1	44.2	199.261	71.794	Non
36 hpf	h12c1	44.2	199.153	71.794	Non
36 hpf	h12c2	37.446	128.515	60.808	Non
36 hpf	h12c2	37.446	146.715	60.808	Non
36 hpf	h12c2	37.446	168.955	60.808	Non
36 hpf	h12c2	37.446	188.237	60.808	Non
36 hpf	h12c2	37.446	204.27	60.808	Non
36 hpf	h12c3	48.09	129.095	78.101	Non
36 hpf	h12c3	48.09	145.467	78.101	Non
36 hpf	h12c3	48.09	166.461	78.101	Non
36 hpf	h12c3	48.09	184.984	78.101	Non
36 hpf	h12c3	48.09	209.193	78.101	Non
36 hpf	h12c3	48.09	221.895	78.101	Non
36 hpf	h12c3	48.09	222.4	78.101	Non
36 hpf	h12c3	48.09	211.856	78.101	Non
36 hpf	h12c3	48.09	189.761	78.101	Non
36 hpf	h12c4	46.091	136.034	74.866	Non
36 hpf	h12c4	46.091	157.785	74.866	Non
36 hpf	h12c4	46.091	182.173	74.866	Non
36 hpf	h12c4	46.091	216.627	74.866	Non
36 hpf	h12c4	46.091	241.271	74.866	Non
36 hpf	h12c4	46.091	262.166	74.866	Non
36 hpf	h12c4	46.091	269.719	74.866	Non
36 hpf	h12c4	46.091	261.322	74.866	Non
36 hpf	h13c1	39.067	132.75	63.447	Non
36 hpf	h13c1	39.067	152.777	63.447	Non
36 hpf	h13c1	39.067	179.179	63.447	Non
36 hpf	h13c1	39.067	199.951	63.447	Non
36 hpf	h13c1	39.067	206.382	63.447	Non
36 hpf	h13c1	39.067	206.798	63.447	Non
36 hpf	h13c1	39.067	202.156	63.447	Non
36 hpf	h13c2	42.417	129.512	68.884	Non
36 hpf	h13c2	42.417	147.055	68.884	Non
36 hpf	h13c2	42.417	170.86	68.884	Non
36 hpf	h13c2	42.417	195.888	68.884	Non
36 hpf	h13c2	40.688	220.884	66.076	Non
36 hpf	h13c2	40.688	232.292	66.076	Non
36 hpf	h13c2	40.688	226.733	66.076	Non
36 hpf	h13c2	40.688	209.561	66.076	Non
36 hpf	h13c3	38.04	153.504	61.77	Non
36 hpf	h13c3	38.04	169.137	61.77	Non
36 hpf	h13c3	38.04	192.218	61.77	Non
36 hpf	h13c3	38.04	216.958	61.77	Non
36 hpf	h13c3	38.04	241.471	61.77	Non
36 hpf	h13c3	40.526	310.793	65.813	Non
36 hpf	h13c3	40.526	325.44	65.813	Non
36 hpf	h13c3	40.526	295.44	65.813	Non
36 hpf	h13c4	38.31	146.147	62.206	Non
36 hpf	h13c4	38.31	158.906	62.206	Non
36 hpf	h13c4	38.31	166.024	62.206	Non
36 hpf	h13c4	37.067	212.663	60.178	Non
36 hpf	h13c4	37.067	257.66	60.178	Non
36 hpf	h13c4	37.067	298.04	60.178	Non
36 hpf	h13c4	37.067	306.615	60.178	Non
36 hpf	h13c4	37.067	293.686	60.178	Non
36 hpf	h13c5	37.013	154.567	60.115	Non
36 hpf	h13c5	37.013	174.334	60.115	Non
36 hpf	h13c5	37.013	187.563	60.115	Non
36 hpf	h13c5	37.013	201.35	60.115	Non
36 hpf	h13c5	37.013	214.517	60.115	Non
36 hpf	h13c5	35.392	248.937	57.46	Non
36 hpf	h13c5	35.392	264.88	57.46	Non
36 hpf	h13c5	35.392	257.219	57.46	Non
36 hpf	h13c5	35.392	237.101	57.46	Non
36 hpf	h13c6	40.742	138.974	66.161	Non
36 hpf	h13c6	40.742	154.39	66.161	Non
36 hpf	h13c6	40.742	165.563	66.161	Non
36 hpf	h13c6	40.742	175.147	66.161	Non
36 hpf	h13c6	41.336	219.198	67.113	Non
36 hpf	h13c6	41.336	238.993	67.113	Non
36 hpf	h13c6	41.336	246.419	67.113	Non
36 hpf	h13c6	41.336	249.06	67.113	Non
36 hpf	h13c6	41.336	240.484	67.113	Non
36 hpf	h13c6	41.336	217	67.113	Non
36 hpf	h14c1	37.284	119.9	60.551	Non
36 hpf	h14c1	37.284	137.65	60.551	Non
36 hpf	h14c1	37.284	158.692	60.551	Non
36 hpf	h14c1	37.284	177.767	60.551	Non
36 hpf	h14c1	37.284	189.308	60.551	Non
36 hpf	h14c1	37.284	213.211	60.551	Non
36 hpf	h14c1	37.284	231.697	60.551	Non
36 hpf	h14c2	36.527	100.227	59.318	Non
36 hpf	h14c2	36.527	107.715	59.318	Non
36 hpf	h14c2	36.527	123.253	59.318	Non
36 hpf	h14c2	36.527	139.928	59.318	Non
36 hpf	h14c2	36.527	151.985	59.318	Non
36 hpf	h14c2	37.067	160.576	60.187	Non
36 hpf	h14c2	37.067	174.572	60.187	Non
36 hpf	h14c2	37.067	192.336	60.187	Non
36 hpf	h14c2	37.067	206.026	60.187	Non
36 hpf	h14c2	37.067	211.281	60.187	Non
36 hpf	h14c3	56.952	102.686	92.529	Non
36 hpf	h14c3	56.952	118.403	92.529	Non
36 hpf	h14c3	56.952	135.968	92.529	Non
36 hpf	h14c3	56.952	149.717	92.529	Non
36 hpf	h14c3	56.952	158.967	92.529	Non
36 hpf	h14c3	56.952	176.825	92.529	Non
36 hpf	h14c3	56.952	196.78	92.529	Non
36 hpf	h14c3	56.952	211.85	92.529	Non
36 hpf	h14c3	56.952	215.186	92.529	Non
36 hpf	h14c4	41.877	116.499	68.003	Non
36 hpf	h14c4	41.877	128.401	68.003	Non
36 hpf	h14c4	41.877	145.653	68.003	Non
36 hpf	h14c4	41.877	160.698	68.003	Non
36 hpf	h14c4	41.877	172.247	68.003	Non
36 hpf	h14c4	41.877	181.081	68.003	Non
36 hpf	h14c4	43.173	218.956	70.111	Non
36 hpf	h14c4	43.173	250.022	70.111	Non
36 hpf	h14c4	43.173	266.671	70.111	Non
36 hpf	h14c4	43.173	273.487	70.111	Non
36 hpf	h14c4	43.173	269.34	70.111	Non
36 hpf	h14c4	43.173	246.734	70.111	Non
36 hpf	h14c4	43.173	226.956	70.111	Non
36 hpf	h14c5	41.39	132.604	67.214	Non
36 hpf	h14c5	41.39	146.763	67.214	Non
36 hpf	h14c5	41.39	167.444	67.214	Non
36 hpf	h14c5	41.39	186.613	67.214	Non
36 hpf	h14c5	41.39	202.794	67.214	Non
36 hpf	h14c5	41.39	212.438	67.214	Non
36 hpf	h14c5	41.228	238.298	66.951	Non
36 hpf	h14c5	41.228	265.399	66.951	Non
36 hpf	h14c5	41.228	275.64	66.951	Non
36 hpf	h14c5	41.228	279.952	66.951	Non
36 hpf	h14c5	41.228	275.728	66.951	Non
36 hpf	h14c5	41.228	262.038	66.951	Non
36 hpf	h16c1	38.634	107.417	62.73	Non
36 hpf	h16c1	38.634	117.176	62.73	Non
36 hpf	h16c1	38.634	134.375	62.73	Non
36 hpf	h16c1	38.31	150.506	62.218	Non
36 hpf	h16c1	38.31	163.992	62.218	Non
36 hpf	h16c1	38.31	181.363	62.218	Non
36 hpf	h16c1	38.31	202.71	62.218	Non
36 hpf	h16c1	38.31	225.928	62.218	Non
36 hpf	h16c1	38.31	238.665	62.218	Non
36 hpf	h16c2	37.338	110.654	60.632	Non
36 hpf	h16c2	37.338	121.051	60.632	Non
36 hpf	h16c2	37.338	140.434	60.632	Non
36 hpf	h16c2	37.338	156.254	60.632	Non
36 hpf	h16c2	37.338	171.295	60.632	Non
36 hpf	h16c2	37.338	182.641	60.632	Non
36 hpf	h16c2	37.338	194.802	60.632	Non
36 hpf	h16c2	37.338	195	60.632	Non
36 hpf	h16c2	37.338	198.982	60.632	Non
36 hpf	h16c3	47.01	136.398	76.352	Non
36 hpf	h16c3	47.01	151.608	76.352	Non
36 hpf	h16c3	47.01	171.291	76.352	Non
36 hpf	h16c3	47.01	197.59	76.352	Non
36 hpf	h16c3	47.01	215.441	76.352	Non
36 hpf	h16c3	47.01	224.86	76.352	Non
36 hpf	h16c3	47.01	225.755	76.352	Non
36 hpf	h16c3	47.01	222.582	76.352	Non
36 hpf	h16c4	59.816	116.261	97.187	Non
36 hpf	h16c4	59.816	127.398	97.187	Non
36 hpf	h16c4	59.816	141.768	97.187	Non
36 hpf	h16c4	59.816	161.519	97.187	Non
36 hpf	h16c4	59.816	178.735	97.187	Non
36 hpf	h16c4	59.816	197.756	97.187	Non
36 hpf	h16c4	59.816	215.984	97.187	Non
36 hpf	h16c4	59.762	247.054	97.093	Non
36 hpf	h16c4	59.762	242.436	97.093	Non
36 hpf	h17c1	47.766	120.885	77.596	Non
36 hpf	h17c1	47.766	141.621	77.596	Non
36 hpf	h17c1	47.766	162.967	77.596	Non
36 hpf	h17c1	47.766	179.486	77.596	Non
36 hpf	h17c1	47.766	192.034	77.596	Non
36 hpf	h17c1	47.55	225.757	77.228	Non
36 hpf	h17c1	47.55	243.572	77.228	Non
36 hpf	h17c1	47.55	260.515	77.228	Non
36 hpf	h17c1	47.55	292.363	77.228	Non
36 hpf	h17c1	47.55	322.568	77.228	Non
36 hpf	h17c1	47.55	327.304	77.228	Non
36 hpf	h17c1	47.55	308.337	77.228	Non
36 hpf	h17c2	43.498	124.058	70.651	Non
36 hpf	h17c2	43.498	144.991	70.651	Non
36 hpf	h17c2	43.498	163.153	70.651	Non
36 hpf	h17c2	43.498	177.939	70.651	Non
36 hpf	h17c2	43.498	197.613	70.651	Non
36 hpf	h17c2	43.498	215.125	70.651	Non
36 hpf	h17c2	43.66	238.267	70.899	Non
36 hpf	h17c2	43.66	252.365	70.899	Non
36 hpf	h17c2	43.66	266.286	70.899	Non
36 hpf	h17c2	43.66	269.805	70.899	Non
36 hpf	h17c2	43.66	258.967	70.899	Non
36 hpf	h17c2	43.66	237.506	70.899	Non
36 hpf	h17c3	40.688	119.592	66.081	Non
36 hpf	h17c3	40.688	135.724	66.081	Non
36 hpf	h17c3	40.688	154.629	66.081	Non
36 hpf	h17c3	40.688	167.537	66.081	Non
36 hpf	h17c3	40.688	178.711	66.081	Non
36 hpf	h17c3	40.688	198.586	66.081	Non
36 hpf	h17c3	40.526	230.2	65.808	Non
36 hpf	h17c3	40.526	250.772	65.808	Non
36 hpf	h17c3	40.526	266.156	65.808	Non
36 hpf	h17c3	40.526	290.321	65.808	Non
36 hpf	h17c3	40.526	305.958	65.808	Non
36 hpf	h17c3	40.526	300.998	65.808	Non
36 hpf	h17c3	40.526	284.489	65.808	Non
36 hpf	h17c4	48.361	143.525	78.545	Non
36 hpf	h17c4	48.361	165.05	78.545	Non
36 hpf	h17c4	48.361	178.763	78.545	Non
36 hpf	h17c4	48.361	189.309	78.545	Non
36 hpf	h17c4	48.361	210.089	78.545	Non
36 hpf	h17c4	48.361	230.273	78.545	Non
36 hpf	h17c4	49.333	264.216	80.137	Non
36 hpf	h17c4	49.333	286.536	80.137	Non
36 hpf	h17c4	49.333	295.32	80.137	Non
36 hpf	h17c4	49.333	288.525	80.137	Non
36 hpf	h17c4	49.333	272.863	80.137	Non
36 hpf	h18c1	49.117	116.291	79.788	Non
36 hpf	h18c1	49.117	134.12	79.788	Non
36 hpf	h18c1	49.117	150.357	79.788	Non
36 hpf	h18c1	49.117	167.783	79.788	Non
36 hpf	h18c1	49.117	186.807	79.788	Non
36 hpf	h18c1	49.117	208.524	79.788	Non
36 hpf	h18c1	49.117	224	79.788	Non
36 hpf	h18c2	55.709	132.744	90.494	Non
36 hpf	h18c2	55.709	151.278	90.494	Non
36 hpf	h18c2	55.709	172.544	90.494	Non
36 hpf	h18c2	55.709	195.669	90.494	Non
36 hpf	h18c2	55.709	217.873	90.494	Non
36 hpf	h18c2	55.709	217.549	90.494	Non
36 hpf	h18c2	55.709	203.014	90.494	Non
36 hpf	h18c2	55.709	181.41	90.494	Non
36 hpf	h18c3	47.55	122.749	77.24	Non
36 hpf	h18c3	47.55	136.127	77.24	Non
36 hpf	h18c3	47.55	145.168	77.24	Non
36 hpf	h18c3	47.55	153.149	77.24	Non
36 hpf	h18c3	47.334	175.444	76.88	Non
36 hpf	h18c3	47.334	183.799	76.88	Non
36 hpf	h18c3	47.334	182.691	76.88	Non
36 hpf	h18c3	47.334	177.521	76.88	Non
36 hpf	h18c3	47.334	168.124	76.88	Non
36 hpf	h1c1	45.929	109.764	74.599	Non
36 hpf	h1c1	45.821	121.623	74.422	Non
36 hpf	h1c1	45.821	125.591	74.422	Non
36 hpf	h1c1	45.821	131.57	74.422	Non
36 hpf	h1c1	45.821	138.395	74.422	Non
36 hpf	h1c1	45.821	148.816	74.422	Non
36 hpf	h1c1	45.767	163.861	74.334	Non
36 hpf	h1c1	45.767	174.233	74.334	Non
36 hpf	h1c1	45.767	182.704	74.334	Non
36 hpf	h1c1	45.767	190.418	74.334	Non
36 hpf	h1c1	45.767	197.126	74.334	Non
36 hpf	h1c1	45.767	203.19	74.334	Non
36 hpf	h1c1	45.767	210.222	74.334	Non
36 hpf	h1c1	45.767	223.542	74.334	Non
36 hpf	h1c1	45.767	240.913	74.334	Non
36 hpf	h1c2	46.632	133.158	75.742	Non
36 hpf	h1c2	46.632	147.295	75.742	Non
36 hpf	h1c2	46.632	151.986	75.742	Non
36 hpf	h1c2	46.632	160.595	75.742	Non
36 hpf	h1c2	46.632	169.954	75.742	Non
36 hpf	h1c2	45.659	194.574	74.167	Non
36 hpf	h1c2	45.659	207.073	74.167	Non
36 hpf	h1c2	45.659	216.153	74.167	Non
36 hpf	h1c2	45.659	222.62	74.167	Non
36 hpf	h1c2	45.659	233.363	74.167	Non
36 hpf	h1c2	45.281	263.295	73.55	Non
36 hpf	h1c2	45.281	272.365	73.55	Non
36 hpf	h1c2	45.281	288.489	73.55	Non
36 hpf	h1c2	45.281	295.532	73.55	Non
36 hpf	h1c3	50.252	109.581	81.628	Non
36 hpf	h1c3	50.252	130.292	81.628	Non
36 hpf	h1c3	50.252	134.796	81.628	Non
36 hpf	h1c3	50.252	134	81.628	Non
36 hpf	h1c3	50.252	135.364	81.628	Non
36 hpf	h1c3	50.252	139.885	81.628	Non
36 hpf	h1c3	50.252	147.369	81.628	Non
36 hpf	h1c3	50.252	153.229	81.628	Non
36 hpf	h1c3	50.414	182.493	81.894	Non
36 hpf	h1c3	50.414	192.899	81.894	Non
36 hpf	h1c3	50.414	199.386	81.894	Non
36 hpf	h1c3	50.414	205.273	81.894	Non
36 hpf	h1c3	50.414	208.454	81.894	Non
36 hpf	h1c4	48.199	111.01	78.299	Non
36 hpf	h1c4	48.199	126.278	78.299	Non
36 hpf	h1c4	48.199	130.62	78.299	Non
36 hpf	h1c4	48.199	134.485	78.299	Non
36 hpf	h1c4	48.199	140.185	78.299	Non
36 hpf	h1c4	48.199	146.005	78.299	Non
36 hpf	h1c4	48.199	151.64	78.299	Non
36 hpf	h1c4	48.199	159.165	78.299	Non
36 hpf	h1c4	47.388	196.632	76.97	Non
36 hpf	h1c4	47.388	207.684	76.97	Non
36 hpf	h1c4	47.388	212.627	76.97	Non
36 hpf	h1c4	47.388	214.25	76.97	Non
36 hpf	h1c4	47.388	209.372	76.97	Non
36 hpf	h1c4	47.388	200.888	76.97	Non
36 hpf	h2c1	51.927	114.331	84.341	Non
36 hpf	h2c1	51.927	133.473	84.341	Non
36 hpf	h2c1	51.927	144.081	84.341	Non
36 hpf	h2c1	51.927	154.818	84.341	Non
36 hpf	h2c1	51.927	162.834	84.341	Non
36 hpf	h2c1	50.954	204.35	82.759	Non
36 hpf	h2c1	50.954	219.037	82.759	Non
36 hpf	h2c1	50.954	230.768	82.759	Non
36 hpf	h2c1	50.954	237.083	82.759	Non
36 hpf	h2c1	50.954	246.879	82.759	Non
36 hpf	h2c1	50.954	257.536	82.759	Non
36 hpf	h2c2	31.124	93.501	50.526	Non
36 hpf	h2c2	31.124	110.895	50.526	Non
36 hpf	h2c2	31.124	129.233	50.526	Non
36 hpf	h2c2	31.124	135.417	50.526	Non
36 hpf	h2c2	31.124	142.008	50.526	Non
36 hpf	h2c2	31.124	147.542	50.526	Non
36 hpf	h2c2	41.498	157.515	67.395	Non
36 hpf	h2c2	41.498	168.926	67.395	Non
36 hpf	h2c2	41.498	180.233	67.395	Non
36 hpf	h2c2	41.498	188.935	67.395	Non
36 hpf	h2c2	41.498	196.641	67.395	Non
36 hpf	h2c2	41.498	206.837	67.395	Non
36 hpf	h2c2	41.498	215.566	67.395	Non
36 hpf	h2c2	41.498	218.43	67.395	Non
36 hpf	h2c2	41.498	225.176	67.395	Non
36 hpf	h2c2	41.498	225.642	67.395	Non
36 hpf	h2c3	49.928	83.226	81.105	Non
36 hpf	h2c3	49.928	97.925	81.105	Non
36 hpf	h2c3	49.928	121.977	81.105	Non
36 hpf	h2c3	49.928	143.308	81.105	Non
36 hpf	h2c3	49.982	160.162	81.19	Non
36 hpf	h2c3	49.982	169.061	81.19	Non
36 hpf	h2c3	49.982	180.918	81.19	Non
36 hpf	h2c3	49.982	190.841	81.19	Non
36 hpf	h2c3	49.982	198.036	81.19	Non
36 hpf	h2c3	49.982	203.905	81.19	Non
36 hpf	h2c3	49.982	214.012	81.19	Non
36 hpf	h2c3	49.982	224.281	81.19	Non
36 hpf	h2c3	49.982	238.082	81.19	Non
36 hpf	h2c3	49.982	247.059	81.19	Non
36 hpf	h2c3	49.982	256.168	81.19	Non
36 hpf	h2c3	49.982	264.031	81.19	Non
36 hpf	h3c1	54.25	100.323	88.131	Non
36 hpf	h3c1	54.25	113.852	88.131	Non
36 hpf	h3c1	54.25	121.446	88.131	Non
36 hpf	h3c1	54.142	134.43	87.971	Non
36 hpf	h3c1	54.142	146.464	87.971	Non
36 hpf	h3c1	54.142	161.016	87.971	Non
36 hpf	h3c1	54.142	178.699	87.971	Non
36 hpf	h3c1	54.142	200.682	87.971	Non
36 hpf	h3c1	54.142	230.396	87.971	Non
36 hpf	h3c1	54.142	249.553	87.971	Non
36 hpf	h3c1	54.142	252.727	87.971	Non
36 hpf	h3c2	63.058	91.282	102.436	Non
36 hpf	h3c2	63.058	103.398	102.436	Non
36 hpf	h3c2	63.058	111.312	102.436	Non
36 hpf	h3c2	63.058	125.235	102.436	Non
36 hpf	h3c2	63.058	142.637	102.436	Non
36 hpf	h3c2	63.058	159.718	102.436	Non
36 hpf	h3c2	63.058	174.357	102.436	Non
36 hpf	h3c2	63.058	188.954	102.436	Non
36 hpf	h3c2	63.058	203.213	102.436	Non
36 hpf	h4c1	40.526	111.155	65.823	Non
36 hpf	h4c1	40.526	140.213	65.823	Non
36 hpf	h4c1	40.526	162.389	65.823	Non
36 hpf	h4c1	40.526	169.675	65.823	Non
36 hpf	h4c1	40.526	176.27	65.823	Non
36 hpf	h4c1	40.526	191.362	65.823	Non
36 hpf	h4c1	40.526	219.603	65.823	Non
36 hpf	h4c1	40.526	266.291	65.823	Non
36 hpf	h4c1	40.634	310.766	65.991	Non
36 hpf	h4c1	40.634	318.233	65.991	Non
36 hpf	h4c1	40.634	311.206	65.991	Non
36 hpf	h4c1	40.634	307.677	65.991	Non
36 hpf	h4c1	40.634	311.451	65.991	Non
36 hpf	h4c1	40.634	315.926	65.991	Non
36 hpf	h4c2	46.686	102.994	75.827	Non
36 hpf	h4c2	46.686	121.985	75.827	Non
36 hpf	h4c2	46.523	138.074	75.564	Non
36 hpf	h4c2	46.523	147.315	75.564	Non
36 hpf	h4c2	46.523	155.953	75.564	Non
36 hpf	h4c2	46.523	172.967	75.564	Non
36 hpf	h4c2	46.523	192.066	75.564	Non
36 hpf	h4c2	46.523	219.162	75.564	Non
36 hpf	h4c2	45.173	238.056	73.363	Non
36 hpf	h4c2	45.173	252.563	73.363	Non
36 hpf	h4c2	45.173	257.958	73.363	Non
36 hpf	h4c2	45.173	260.735	73.363	Non
36 hpf	h4c3	62.355	99.839	101.319	Non
36 hpf	h4c3	62.355	116.387	101.319	Non
36 hpf	h4c3	63.166	159.425	102.633	Non
36 hpf	h4c3	63.166	179.192	102.633	Non
36 hpf	h4c3	63.166	189.632	102.633	Non
36 hpf	h4c3	63.166	198.161	102.633	Non
36 hpf	h4c3	63.166	214.975	102.633	Non
36 hpf	h4c3	62.626	256.674	101.768	Non
36 hpf	h4c3	62.626	284.867	101.768	Non
36 hpf	h4c3	62.626	307.471	101.768	Non
36 hpf	h4c3	62.626	322.847	101.768	Non
36 hpf	h4c3	62.626	332.667	101.768	Non
36 hpf	h4c3	62.626	345.986	101.768	Non
36 hpf	h4c4	39.067	112.618	63.44	Non
36 hpf	h4c4	39.067	127.164	63.44	Non
36 hpf	h4c4	39.067	141.096	63.44	Non
36 hpf	h4c4	39.067	151.414	63.44	Non
36 hpf	h4c4	39.067	163.324	63.44	Non
36 hpf	h4c4	39.121	213.547	63.543	Non
36 hpf	h4c4	39.121	242.919	63.543	Non
36 hpf	h4c4	39.121	268.321	63.543	Non
36 hpf	h4c4	39.121	304.622	63.543	Non
36 hpf	h4c4	39.121	346.582	63.543	Non
36 hpf	h4c4	39.121	371.445	63.543	Non
36 hpf	h4c5	50.63	104.283	82.251	Non
36 hpf	h4c5	50.63	135.355	82.251	Non
36 hpf	h4c5	50.63	156.117	82.251	Non
36 hpf	h4c5	50.63	164.782	82.251	Non
36 hpf	h4c5	50.63	171.561	82.251	Non
36 hpf	h4c5	50.63	182.979	82.251	Non
36 hpf	h4c5	51.008	234.327	82.858	Non
36 hpf	h4c5	51.008	269.78	82.858	Non
36 hpf	h4c5	51.008	293.215	82.858	Non
36 hpf	h4c5	51.008	311.473	82.858	Non
36 hpf	h4c5	51.008	328.548	82.858	Non
36 hpf	h4c5	51.008	340.079	82.858	Non
36 hpf	h4c6	38.148	111.569	61.949	Non
36 hpf	h4c6	38.148	139.262	61.949	Non
36 hpf	h4c6	38.148	165.3	61.949	Non
36 hpf	h4c6	38.148	181.078	61.949	Non
36 hpf	h4c6	38.148	193.025	61.949	Non
36 hpf	h4c6	38.148	214.171	61.949	Non
36 hpf	h4c6	38.148	233.998	61.949	Non
36 hpf	h4c6	36.365	305.959	59.047	Non
36 hpf	h4c6	36.365	319.338	59.047	Non
36 hpf	h4c6	36.365	317.082	59.047	Non
36 hpf	h4c6	36.365	310.175	59.047	Non
36 hpf	h4c6	36.365	307.032	59.047	Non
36 hpf	h5c1	50.09	88.019	81.366	Non
36 hpf	h5c1	50.09	99.127	81.366	Non
36 hpf	h5c1	50.09	107.342	81.366	Non
36 hpf	h5c1	50.09	119.491	81.366	Non
36 hpf	h5c1	50.09	128.758	81.366	Non
36 hpf	h5c1	50.09	134.833	81.366	Non
36 hpf	h5c1	50.09	142.357	81.366	Non
36 hpf	h5c1	50.09	151.151	81.366	Non
36 hpf	h5c1	50.09	160.655	81.366	Non
36 hpf	h5c1	50.09	170.27	81.366	Non
36 hpf	h5c1	50.09	177.941	81.366	Non
36 hpf	h5c1	50.09	184.634	81.366	Non
36 hpf	h5c1	50.09	193.656	81.366	Non
36 hpf	h5c2	58.897	98.976	95.685	Non
36 hpf	h5c2	58.897	111.61	95.685	Non
36 hpf	h5c2	58.897	121.897	95.685	Non
36 hpf	h5c2	58.897	134.617	95.685	Non
36 hpf	h5c2	58.897	147.468	95.685	Non
36 hpf	h5c2	58.897	158.807	95.685	Non
36 hpf	h5c2	58.897	173.152	95.685	Non
36 hpf	h5c2	58.897	188.202	95.685	Non
36 hpf	h5c2	59.113	220.089	96.028	Non
36 hpf	h5c2	59.113	239.31	96.028	Non
36 hpf	h5c2	59.113	260.256	96.028	Non
36 hpf	h5c2	59.113	267.465	96.028	Non
36 hpf	h5c3	56.358	87.504	91.55	Non
36 hpf	h5c3	56.358	105.353	91.55	Non
36 hpf	h5c3	56.358	118.246	91.55	Non
36 hpf	h5c3	56.358	128.086	91.55	Non
36 hpf	h5c3	56.358	139.832	91.55	Non
36 hpf	h5c3	56.358	153.284	91.55	Non
36 hpf	h5c3	56.412	186.27	91.647	Non
36 hpf	h5c3	56.412	210.927	91.647	Non
36 hpf	h5c3	56.412	234.369	91.647	Non
36 hpf	h5c3	56.412	252.935	91.647	Non
36 hpf	h5c3	56.412	259.961	91.647	Non
36 hpf	h5c3	56.412	258.338	91.647	Non
36 hpf	h5c4	41.606	85.008	67.574	Non
36 hpf	h5c4	41.606	98.494	67.574	Non
36 hpf	h5c4	41.606	110.09	67.574	Non
36 hpf	h5c4	41.606	123.757	67.574	Non
36 hpf	h5c4	41.714	144.724	67.742	Non
36 hpf	h5c4	41.714	166.294	67.742	Non
36 hpf	h5c4	41.714	183.246	67.742	Non
36 hpf	h5c4	41.714	199.223	67.742	Non
36 hpf	h5c4	41.714	217.333	67.742	Non
36 hpf	h5c4	41.714	245.505	67.742	Non
36 hpf	h5c4	41.714	273.86	67.742	Non
36 hpf	h5c4	41.714	299.627	67.742	Non
36 hpf	h6c1	44.092	135.128	71.612	Non
36 hpf	h6c1	44.092	183.582	71.612	Non
36 hpf	h6c1	44.092	218.777	71.612	Non
36 hpf	h6c1	44.092	250.518	71.612	Non
36 hpf	h6c1	44.092	291.901	71.612	Non
36 hpf	h6c1	44.092	316.473	71.612	Non
36 hpf	h6c1	44.092	333.266	71.612	Non
36 hpf	h6c1	44.092	338.746	71.612	Non
36 hpf	h6c2	58.033	103.639	94.281	Non
36 hpf	h6c2	58.033	141.195	94.281	Non
36 hpf	h6c2	58.033	185.483	94.281	Non
36 hpf	h6c2	58.033	208.241	94.281	Non
36 hpf	h6c2	58.033	227.748	94.281	Non
36 hpf	h6c2	58.033	261.63	94.281	Non
36 hpf	h6c2	58.033	295.05	94.281	Non
36 hpf	h6c2	58.033	312.777	94.281	Non
36 hpf	h6c2	58.033	307.273	94.281	Non
36 hpf	h6c2	58.033	293.268	94.281	Non
36 hpf	h6c2	58.033	275.327	94.281	Non
36 hpf	h6c3	63.76	139.866	103.589	Non
36 hpf	h6c3	63.76	177.603	103.589	Non
36 hpf	h6c3	63.76	200.94	103.589	Non
36 hpf	h6c3	63.76	226.793	103.589	Non
36 hpf	h6c3	63.76	262.306	103.589	Non
36 hpf	h6c3	63.76	299.73	103.589	Non
36 hpf	h6c3	63.76	329.18	103.589	Non
36 hpf	h6c3	63.76	345.897	103.589	Non
36 hpf	h6c3	63.76	366.1	103.589	Non
36 hpf	h6c3	63.76	384.579	103.589	Non
36 hpf	h6c4	41.877	104.891	68.008	Non
36 hpf	h6c4	41.877	132.716	68.008	Non
36 hpf	h6c4	41.877	158.225	68.008	Non
36 hpf	h6c4	41.877	184.701	68.008	Non
36 hpf	h6c4	41.877	222.943	68.008	Non
36 hpf	h6c4	41.877	266.136	68.008	Non
36 hpf	h6c4	41.877	299.808	68.008	Non
36 hpf	h6c4	41.877	308.129	68.008	Non
36 hpf	h6c4	41.877	314.55	68.008	Non
36 hpf	h6c4	41.877	307.95	68.008	Non
36 hpf	h6c4	41.877	286.58	68.008	Non
36 hpf	h6c4	41.877	264.743	68.008	Non
36 hpf	h7c1	59.005	89.614	95.864	Non
36 hpf	h7c1	59.005	100.954	95.864	Non
36 hpf	h7c1	59.005	115.466	95.864	Non
36 hpf	h7c1	59.005	129.769	95.864	Non
36 hpf	h7c1	59.005	140.014	95.864	Non
36 hpf	h7c1	59.005	148.366	95.864	Non
36 hpf	h7c1	59.005	158.812	95.864	Non
36 hpf	h7c1	59.005	187.901	95.864	Non
36 hpf	h7c1	59.005	219.669	95.864	Non
36 hpf	h7c1	59.005	236.772	95.864	Non
36 hpf	h7c1	59.005	250.845	95.864	Non
36 hpf	h7c2	36.743	101.497	59.669	Non
36 hpf	h7c2	36.743	125	59.669	Non
36 hpf	h7c2	36.743	145.117	59.669	Non
36 hpf	h7c2	36.743	164.122	59.669	Non
36 hpf	h7c2	36.743	177.005	59.669	Non
36 hpf	h7c2	30.908	199.893	50.166	Non
36 hpf	h7c2	30.908	230.044	50.166	Non
36 hpf	h7c2	30.908	247.982	50.166	Non
36 hpf	h7c2	30.908	265.902	50.166	Non
36 hpf	h7c2	30.908	295.123	50.166	Non
36 hpf	h7c2	30.908	314.951	50.166	Non
36 hpf	h7c3	44.632	91.03	72.507	Non
36 hpf	h7c3	44.632	103.274	72.507	Non
36 hpf	h7c3	44.632	117.637	72.507	Non
36 hpf	h7c3	44.632	131.115	72.507	Non
36 hpf	h7c3	44.632	148.173	72.507	Non
36 hpf	h7c3	44.632	178.142	72.507	Non
36 hpf	h7c3	44.632	197.905	72.507	Non
36 hpf	h7c3	44.632	204.209	72.507	Non
36 hpf	h7c3	49.874	239.021	81.003	Non
36 hpf	h7c3	49.874	253.412	81.003	Non
36 hpf	h7c3	49.874	259.872	81.003	Non
36 hpf	h8c1	53.98	101.795	87.695	Non
36 hpf	h8c1	53.98	121.682	87.695	Non
36 hpf	h8c1	53.98	128.286	87.695	Non
36 hpf	h8c1	53.98	128.165	87.695	Non
36 hpf	h8c1	53.98	129.624	87.695	Non
36 hpf	h8c1	53.98	132.823	87.695	Non
36 hpf	h8c1	53.98	137.778	87.695	Non
36 hpf	h8c1	52.629	178.036	85.494	Non
36 hpf	h8c1	52.629	177.112	85.494	Non
36 hpf	h8c1	52.845	197.96	85.853	Non
36 hpf	h8c1	52.845	203.478	85.853	Non
36 hpf	h8c1	52.845	211.871	85.853	Non
36 hpf	h8c1	52.845	222.395	85.853	Non
36 hpf	h8c1	52.845	230.181	85.853	Non
36 hpf	h8c2	49.009	94.554	79.601	Non
36 hpf	h8c2	49.009	110.862	79.601	Non
36 hpf	h8c2	49.009	123.054	79.601	Non
36 hpf	h8c2	49.009	129.075	79.601	Non
36 hpf	h8c2	49.009	131.867	79.601	Non
36 hpf	h8c2	49.009	135.244	79.601	Non
36 hpf	h8c2	49.009	135.452	79.601	Non
36 hpf	h8c2	49.549	152.392	80.48	Non
36 hpf	h8c2	49.549	153.561	80.48	Non
36 hpf	h8c2	49.549	154.781	80.48	Non
36 hpf	h8c2	49.549	161.001	80.48	Non
36 hpf	h8c2	49.549	169.686	80.48	Non
36 hpf	h8c2	49.549	179.089	80.48	Non
36 hpf	h8c2	49.549	189.473	80.48	Non
36 hpf	h8c3	48.307	110.503	78.453	Non
36 hpf	h8c3	48.307	127.484	78.453	Non
36 hpf	h8c3	48.307	130.726	78.453	Non
36 hpf	h8c3	48.307	130.687	78.453	Non
36 hpf	h8c3	48.307	133.077	78.453	Non
36 hpf	h8c3	48.307	139.804	78.453	Non
36 hpf	h8c3	48.307	151.381	78.453	Non
36 hpf	h8c3	48.307	157.169	78.453	Non
36 hpf	h8c3	48.307	162.607	78.453	Non
36 hpf	h8c3	48.307	168.574	78.453	Non
36 hpf	h8c3	48.307	176.845	78.453	Non
36 hpf	h8c3	48.307	185.362	78.453	Non
36 hpf	h8c3	48.307	196.015	78.453	Non
36 hpf	h8c3	48.307	203.062	78.453	Non
36 hpf	h8c4	34.096	111.222	55.361	Non
36 hpf	h8c4	34.096	131.687	55.361	Non
36 hpf	h8c4	34.096	138.382	55.361	Non
36 hpf	h8c4	34.096	137.526	55.361	Non
36 hpf	h8c4	34.096	137.241	55.361	Non
36 hpf	h8c4	33.663	176.757	54.64	Non
36 hpf	h8c4	33.663	182.461	54.64	Non
36 hpf	h8c4	33.663	189.291	54.64	Non
36 hpf	h8c4	33.663	200.06	54.64	Non
36 hpf	h8c4	33.663	211.868	54.64	Non
36 hpf	h8c4	31.178	237.211	50.6	Non
36 hpf	h8c4	31.178	255.881	50.6	Non
36 hpf	h8c4	31.178	269.453	50.6	Non
36 hpf	h9c1	54.142	108.875	87.951	Non
36 hpf	h9c1	54.142	119.448	87.951	Non
36 hpf	h9c1	54.142	128.384	87.951	Non
36 hpf	h9c1	54.142	137.007	87.951	Non
36 hpf	h9c1	54.142	149.793	87.951	Non
36 hpf	h9c1	54.142	160.072	87.951	Non
36 hpf	h9c1	54.142	171.389	87.951	Non
36 hpf	h9c1	54.142	182.863	87.951	Non
36 hpf	h9c1	54.142	198.425	87.951	Non
36 hpf	h9c1	50.468	233.987	81.977	Non
36 hpf	h9c1	50.468	229.45	81.977	Non
36 hpf	h9c2	56.304	147.877	91.464	Non
36 hpf	h9c2	56.304	161.663	91.464	Non
36 hpf	h9c2	56.304	173.749	91.464	Non
36 hpf	h9c2	56.304	192.471	91.464	Non
36 hpf	h9c2	56.304	208.873	91.464	Non
36 hpf	h9c2	55.277	248.205	89.799	Non
36 hpf	h9c2	55.277	260.712	89.799	Non
36 hpf	h9c2	55.277	260.583	89.799	Non
36 hpf	h9c2	55.277	246.583	89.799	Non
36 hpf	h9c3	38.797	118.683	62.998	Non
36 hpf	h9c3	38.797	128.789	62.998	Non
36 hpf	h9c3	38.797	157.517	62.998	Non
36 hpf	h9c3	38.797	172.715	62.998	Non
36 hpf	h9c3	38.797	183.552	62.998	Non
36 hpf	h9c3	38.797	192.802	62.998	Non
36 hpf	h9c3	38.797	205.995	62.998	Non
36 hpf	h9c4	45.713	116.842	74.255	Non
36 hpf	h9c4	45.713	128.759	74.255	Non
36 hpf	h9c4	45.713	148.496	74.255	Non
36 hpf	h9c4	45.713	173.981	74.255	Non
36 hpf	h9c4	45.875	219.345	74.499	Non
36 hpf	h9c4	45.875	242.237	74.499	Non
36 hpf	h9c4	45.875	256.171	74.499	Non
36 hpf	h9c4	48.144	263.742	78.186	Non
36 hpf	h9c4	48.144	248.315	78.186	Non
36 hpf	h9c4	48.144	231.87	78.186	Non
48 hpf	h10c1	51.711	121.93	83.999	Non
48 hpf	h10c1	51.711	138.844	83.999	Non
48 hpf	h10c1	51.711	154.577	83.999	Non
48 hpf	h10c1	51.711	163.255	83.999	Non
48 hpf	h10c1	51.711	175.532	83.999	Non
48 hpf	h10c1	51.711	190.053	84.007	Non
48 hpf	h10c1	51.711	202.059	84.007	Non
48 hpf	h10c1	51.711	204.822	84.007	Non
48 hpf	h10c1	51.711	201.08	84.007	Non
48 hpf	h10c1	51.603	216.146	83.823	Non
48 hpf	h10c1	51.603	208.48	83.823	Non
48 hpf	h10c2	45.983	105.264	74.685	Non
48 hpf	h10c2	45.983	116.335	74.685	Non
48 hpf	h10c2	45.983	130.255	74.685	Non
48 hpf	h10c2	46.577	134.194	75.642	Non
48 hpf	h10c2	46.577	146.389	75.642	Non
48 hpf	h10c2	46.577	158.227	75.642	Non
48 hpf	h10c2	46.577	162.767	75.642	Non
48 hpf	h10c2	46.632	203.301	75.73	Non
48 hpf	h10c2	46.632	204.854	75.73	Non
48 hpf	h10c2	46.632	202.95	75.73	Non
48 hpf	h10c3	43.552	137.589	70.733	Non
48 hpf	h10c3	43.552	150.608	70.733	Non
48 hpf	h10c3	43.552	159.903	70.733	Non
48 hpf	h10c3	43.552	166.212	70.733	Non
48 hpf	h10c3	43.552	170.864	70.733	Non
48 hpf	h10c3	43.552	173.209	70.733	Non
48 hpf	h10c3	43.552	175.632	70.733	Non
48 hpf	h10c3	44.848	201.416	72.827	Non
48 hpf	h10c3	44.848	210.629	72.827	Non
48 hpf	h10c3	44.848	210.419	72.827	Non
48 hpf	h10c3	44.848	204.199	72.827	Non
48 hpf	h10c4	53.008	153.882	86.098	Non
48 hpf	h10c4	53.008	164.184	86.098	Non
48 hpf	h10c4	53.008	175.328	86.098	Non
48 hpf	h10c4	52.737	187.961	85.66	Non
48 hpf	h10c4	52.737	202.706	85.66	Non
48 hpf	h10c4	52.737	214.58	85.66	Non
48 hpf	h10c4	52.737	222.084	85.66	Non
48 hpf	h10c4	52.737	223.641	85.66	Non
48 hpf	h10c4	52.737	214.79	85.66	Non
48 hpf	h10c4	52.737	200.834	85.66	Non
48 hpf	h11c1	41.985	134.923	68.177	Non
48 hpf	h11c1	41.985	160.707	68.177	Non
48 hpf	h11c1	41.985	189.786	68.177	Non
48 hpf	h11c1	41.985	215.306	68.177	Non
48 hpf	h11c1	41.985	232.117	68.177	Non
48 hpf	h11c1	41.985	252.045	68.177	Non
48 hpf	h11c1	41.985	278.26	68.177	Non
48 hpf	h11c1	41.985	295.299	68.177	Non
48 hpf	h11c1	41.985	297.195	68.177	Non
48 hpf	h11c2	37.013	140.693	60.089	Non
48 hpf	h11c2	37.013	174.524	60.089	Non
48 hpf	h11c2	37.013	211.696	60.089	Non
48 hpf	h11c2	37.013	237.958	60.089	Non
48 hpf	h11c2	36.959	274.952	60.001	Non
48 hpf	h11c2	36.959	317.754	60.001	Non
48 hpf	h11c2	36.959	356.944	60.001	Non
48 hpf	h11c2	36.959	379.656	60.001	Non
48 hpf	h11c2	36.959	384.793	60.001	Non
48 hpf	h11c3	45.227	124.046	73.467	Non
48 hpf	h11c3	45.227	148.147	73.467	Non
48 hpf	h11c3	45.227	169.178	73.467	Non
48 hpf	h11c3	45.227	190	73.467	Non
48 hpf	h11c3	45.227	210.892	73.467	Non
48 hpf	h11c3	45.227	229.868	73.467	Non
48 hpf	h11c3	45.443	265.503	73.801	Non
48 hpf	h11c3	45.443	274.671	73.801	Non
48 hpf	h11c3	45.443	266.708	73.801	Non
48 hpf	h11c3	45.443	243.418	73.801	Non
48 hpf	h11c4	46.577	142.875	75.662	Non
48 hpf	h11c4	46.577	167.163	75.662	Non
48 hpf	h11c4	46.577	181.905	75.662	Non
48 hpf	h11c4	46.577	194.457	75.662	Non
48 hpf	h11c4	46.577	211.382	75.662	Non
48 hpf	h11c4	47.496	241.586	77.133	Non
48 hpf	h11c4	47.496	262.838	77.133	Non
48 hpf	h11c4	47.496	282.785	77.133	Non
48 hpf	h11c4	47.496	303.981	77.133	Non
48 hpf	h11c4	47.496	311.359	77.133	Non
48 hpf	h11c4	47.496	302.912	77.133	Non
48 hpf	h11c4	47.496	282.485	77.133	Non
48 hpf	h11c5	38.094	133.759	61.856	Non
48 hpf	h11c5	38.094	153.364	61.856	Non
48 hpf	h11c5	38.094	167.417	61.856	Non
48 hpf	h11c5	38.094	180.17	61.856	Non
48 hpf	h11c5	41.498	228.662	67.385	Non
48 hpf	h11c5	41.498	260.895	67.385	Non
48 hpf	h11c5	41.498	280.043	67.385	Non
48 hpf	h11c5	41.498	288.949	67.385	Non
48 hpf	h11c5	41.498	291.445	67.385	Non
48 hpf	h11c5	41.498	284.09	67.385	Non
48 hpf	h11c5	41.498	262.176	67.385	Non
48 hpf	h12c1	61.707	122.907	100.265	Non
48 hpf	h12c1	61.707	144.674	100.265	Non
48 hpf	h12c1	61.707	161.381	100.265	Non
48 hpf	h12c1	61.707	182.159	100.265	Non
48 hpf	h12c1	62.626	213.329	101.746	Non
48 hpf	h12c1	62.626	239.667	101.746	Non
48 hpf	h12c1	62.626	244.425	101.746	Non
48 hpf	h12c1	62.626	228.555	101.746	Non
48 hpf	h12c2	45.659	123.975	74.164	Non
48 hpf	h12c2	45.659	152.05	74.164	Non
48 hpf	h12c2	45.659	177.338	74.164	Non
48 hpf	h12c2	45.659	193.917	74.164	Non
48 hpf	h12c2	45.659	213.871	74.164	Non
48 hpf	h12c2	45.659	236.155	74.164	Non
48 hpf	h12c2	45.659	253.72	74.164	Non
48 hpf	h12c2	45.659	247.051	74.164	Non
48 hpf	h12c2	45.659	233.527	74.164	Non
48 hpf	h12c3	51.927	123.673	84.344	Non
48 hpf	h12c3	51.927	142.771	84.344	Non
48 hpf	h12c3	51.927	172.001	84.344	Non
48 hpf	h12c3	51.927	193.619	84.344	Non
48 hpf	h12c3	51.927	211.057	84.344	Non
48 hpf	h12c3	51.927	227.193	84.344	Non
48 hpf	h12c3	51.927	246.983	84.344	Non
48 hpf	h12c3	51.927	254.955	84.344	Non
48 hpf	h12c3	51.927	246.507	84.344	Non
48 hpf	h12c4	48.685	122.914	79.083	Non
48 hpf	h12c4	48.685	149.109	79.083	Non
48 hpf	h12c4	48.685	174.21	79.083	Non
48 hpf	h12c4	48.685	190.488	79.083	Non
48 hpf	h12c4	48.685	210.02	79.083	Non
48 hpf	h12c4	48.685	235.287	79.083	Non
48 hpf	h12c4	49.009	277.721	79.615	Non
48 hpf	h12c4	49.009	285.868	79.615	Non
48 hpf	h12c4	49.009	276.948	79.615	Non
48 hpf	h12c4	49.009	254.464	79.615	Non
48 hpf	h13c1	47.766	100.835	77.569	Non
48 hpf	h13c1	47.766	111.531	77.569	Non
48 hpf	h13c1	47.766	122.511	77.569	Non
48 hpf	h13c1	47.766	132.65	77.569	Non
48 hpf	h13c1	47.766	144.339	77.569	Non
48 hpf	h13c1	47.766	159.603	77.569	Non
48 hpf	h13c1	47.388	224.61	76.99	Non
48 hpf	h13c1	47.388	240.976	76.99	Non
48 hpf	h13c1	47.388	247.111	76.99	Non
48 hpf	h13c1	47.388	243.259	76.99	Non
48 hpf	h13c1	47.388	232.996	76.99	Non
48 hpf	h13c2	44.416	137.167	72.145	Non
48 hpf	h13c2	44.416	163.132	72.145	Non
48 hpf	h13c2	44.416	194.219	72.145	Non
48 hpf	h13c2	44.416	213.788	72.145	Non
48 hpf	h13c2	44.416	228.253	72.145	Non
48 hpf	h13c2	44.2	255.721	71.776	Non
48 hpf	h13c2	44.2	275.715	71.776	Non
48 hpf	h13c2	44.2	290.555	71.776	Non
48 hpf	h13c2	44.2	290.701	71.776	Non
48 hpf	h13c2	44.2	284.39	71.776	Non
48 hpf	h13c3	44.2	124.402	71.786	Non
48 hpf	h13c3	44.2	150.759	71.786	Non
48 hpf	h13c3	44.2	190.018	71.786	Non
48 hpf	h13c3	44.2	223.05	71.786	Non
48 hpf	h13c3	44.2	237.787	71.786	Non
48 hpf	h13c3	44.2	254.361	71.786	Non
48 hpf	h13c3	44.2	272.712	71.786	Non
48 hpf	h13c3	44.2	285.856	71.786	Non
48 hpf	h13c3	44.2	276.687	71.786	Non
48 hpf	h13c4	53.332	116.702	86.65	Non
48 hpf	h13c4	53.332	141.235	86.65	Non
48 hpf	h13c4	53.332	169.788	86.65	Non
48 hpf	h13c4	53.332	189.148	86.65	Non
48 hpf	h13c4	53.494	216.061	86.9	Non
48 hpf	h13c4	53.494	243.499	86.9	Non
48 hpf	h13c4	53.494	278.659	86.9	Non
48 hpf	h13c4	53.494	300.602	86.9	Non
48 hpf	h13c4	53.494	299.346	86.9	Non
48 hpf	h14c1	55.763	122.296	90.587	Non
48 hpf	h14c1	55.763	149.456	90.587	Non
48 hpf	h14c1	55.763	174.866	90.587	Non
48 hpf	h14c1	55.763	197.751	90.587	Non
48 hpf	h14c1	55.763	218.503	90.587	Non
48 hpf	h14c1	60.626	270	98.471	Non
48 hpf	h14c1	60.626	267.415	98.471	Non
48 hpf	h14c1	60.626	251.208	98.471	Non
48 hpf	h14c1	56.304	267.002	91.457	Non
48 hpf	h14c1	56.304	242.236	91.457	Non
48 hpf	h14c1	56.304	212.282	91.457	Non
48 hpf	h14c2	50.468	164.415	81.977	Non
48 hpf	h14c2	50.468	197.322	81.977	Non
48 hpf	h14c2	50.468	225.391	81.977	Non
48 hpf	h14c2	50.468	250.49	81.977	Non
48 hpf	h14c2	50.468	272.549	81.977	Non
48 hpf	h14c2	50.468	284.721	81.977	Non
48 hpf	h14c2	50.468	278.772	81.977	Non
48 hpf	h14c2	50.468	270.537	81.977	Non
48 hpf	h14c3	53.116	119.038	86.285	Non
48 hpf	h14c3	53.116	135.413	86.285	Non
48 hpf	h14c3	53.116	156.163	86.285	Non
48 hpf	h14c3	53.116	172.497	86.285	Non
48 hpf	h14c3	53.116	184.771	86.285	Non
48 hpf	h14c3	53.116	198.117	86.285	Non
48 hpf	h14c3	53.116	213.181	86.285	Non
48 hpf	h14c3	53.116	223.701	86.285	Non
48 hpf	h14c3	53.116	235.103	86.285	Non
48 hpf	h14c3	53.116	241.34	86.285	Non
48 hpf	h14c3	53.116	247.59	86.285	Non
48 hpf	h14c3	53.116	240.698	86.285	Non
48 hpf	h14c4	45.875	113.035	74.517	Non
48 hpf	h14c4	45.875	129.764	74.517	Non
48 hpf	h14c4	45.875	144.333	74.517	Non
48 hpf	h14c4	45.875	154.236	74.517	Non
48 hpf	h14c4	45.875	160.076	74.517	Non
48 hpf	h14c4	45.875	164.065	74.517	Non
48 hpf	h14c4	45.875	165.395	74.517	Non
48 hpf	h14c4	45.875	169.398	74.517	Non
48 hpf	h14c4	45.875	172.461	74.517	Non
48 hpf	h14c4	45.065	200.974	73.19	Non
48 hpf	h14c4	45.065	200.085	73.19	Non
48 hpf	h14c4	45.065	196.176	73.19	Non
48 hpf	h15c1	61.167	126.295	99.375	Non
48 hpf	h15c1	61.167	149.126	99.375	Non
48 hpf	h15c1	61.167	168.01	99.375	Non
48 hpf	h15c1	61.167	191.729	99.375	Non
48 hpf	h15c1	61.167	218.753	99.375	Non
48 hpf	h15c1	60.951	240.46	99.021	Non
48 hpf	h15c1	60.951	239.37	99.021	Non
48 hpf	h15c2	46.956	123.74	76.263	Non
48 hpf	h15c2	46.956	148.012	76.263	Non
48 hpf	h15c2	46.956	169.953	76.263	Non
48 hpf	h15c2	46.956	196.14	76.263	Non
48 hpf	h15c2	46.956	241.126	76.276	Non
48 hpf	h15c2	46.956	268.549	76.276	Non
48 hpf	h15c2	46.956	282.229	76.276	Non
48 hpf	h15c2	46.956	289.723	76.276	Non
48 hpf	h15c3	48.577	125.108	78.911	Non
48 hpf	h15c3	48.577	153.313	78.911	Non
48 hpf	h15c3	48.577	182.294	78.911	Non
48 hpf	h15c3	48.577	217.609	78.911	Non
48 hpf	h15c3	48.847	266.678	79.342	Non
48 hpf	h15c3	48.847	295.898	79.342	Non
48 hpf	h15c3	48.847	310.777	79.342	Non
48 hpf	h15c3	48.847	311.209	79.342	Non
48 hpf	h15c3	48.847	284.283	79.342	Non
48 hpf	h15c4	47.28	121.799	76.802	Non
48 hpf	h15c4	47.28	149.392	76.802	Non
48 hpf	h15c4	47.28	179	76.802	Non
48 hpf	h15c4	47.28	199.615	76.802	Non
48 hpf	h15c4	47.28	222.938	76.802	Non
48 hpf	h15c4	47.28	252.351	76.802	Non
48 hpf	h15c4	47.28	268.845	76.802	Non
48 hpf	h15c4	47.28	270.86	76.802	Non
48 hpf	h15c4	47.28	258.966	76.802	Non
48 hpf	h16c1	52.791	108.923	85.753	Non
48 hpf	h16c1	52.791	125.245	85.753	Non
48 hpf	h16c1	52.791	149.325	85.753	Non
48 hpf	h16c1	52.791	169.068	85.753	Non
48 hpf	h16c1	52.791	187.974	85.753	Non
48 hpf	h16c1	52.791	207.22	85.753	Non
48 hpf	h16c1	52.791	223.418	85.753	Non
48 hpf	h16c1	52.791	230.538	85.753	Non
48 hpf	h16c1	52.791	229.362	85.753	Non
48 hpf	h16c1	52.791	226.774	85.753	Non
48 hpf	h16c2	51.278	175.322	83.286	Non
48 hpf	h16c2	51.278	209.485	83.286	Non
48 hpf	h16c2	51.278	230.822	83.286	Non
48 hpf	h16c2	51.278	246.675	83.286	Non
48 hpf	h16c2	51.278	256.173	83.286	Non
48 hpf	h16c2	51.278	262.478	83.286	Non
48 hpf	h16c2	51.278	271.712	83.286	Non
48 hpf	h16c2	51.278	271.712	83.286	Non
48 hpf	h16c2	51.278	275.495	83.286	Non
48 hpf	h16c3	50.144	156.553	81.447	Non
48 hpf	h16c3	50.144	186.915	81.447	Non
48 hpf	h16c3	50.144	216.895	81.447	Non
48 hpf	h16c3	50.144	236.579	81.447	Non
48 hpf	h16c3	50.144	248.792	81.447	Non
48 hpf	h16c3	49.657	312.202	80.658	Non
48 hpf	h16c3	49.657	314.618	80.658	Non
48 hpf	h16c3	49.657	297.865	80.658	Non
48 hpf	h16c3	49.657	281.963	80.658	Non
48 hpf	h16c4	49.333	131.762	80.142	Non
48 hpf	h16c4	49.333	159.035	80.142	Non
48 hpf	h16c4	49.333	184.206	80.142	Non
48 hpf	h16c4	49.333	205.513	80.142	Non
48 hpf	h16c4	49.333	218.972	80.142	Non
48 hpf	h16c4	49.333	222.353	80.142	Non
48 hpf	h16c4	49.333	220.814	80.142	Non
48 hpf	h16c4	49.225	220.215	79.971	Non
48 hpf	h16c4	49.225	216.395	79.971	Non
48 hpf	h16c4	49.225	201.845	79.971	Non
48 hpf	h17c1	45.281	106.56	73.547	Non
48 hpf	h17c1	45.281	118.83	73.547	Non
48 hpf	h17c1	45.281	139.057	73.547	Non
48 hpf	h17c1	45.281	159.643	73.547	Non
48 hpf	h17c1	45.281	171.402	73.547	Non
48 hpf	h17c1	45.227	182.528	73.451	Non
48 hpf	h17c1	45.227	199.806	73.451	Non
48 hpf	h17c1	45.227	227.473	73.451	Non
48 hpf	h17c1	45.227	248.575	73.451	Non
48 hpf	h17c1	45.227	252.134	73.451	Non
48 hpf	h17c1	45.227	238.541	73.451	Non
48 hpf	h17c1	45.227	221.9	73.451	Non
48 hpf	h17c2	48.361	116.507	78.556	Non
48 hpf	h17c2	48.361	127.084	78.556	Non
48 hpf	h17c2	48.361	135.452	78.556	Non
48 hpf	h17c2	48.361	147.31	78.556	Non
48 hpf	h17c2	48.361	162.571	78.556	Non
48 hpf	h17c2	50.792	188.972	82.503	Non
48 hpf	h17c2	50.792	191.528	82.503	Non
48 hpf	h17c2	50.792	191.618	82.503	Non
48 hpf	h17c2	50.792	194.489	82.503	Non
48 hpf	h17c3	47.226	112.713	76.703	Non
48 hpf	h17c3	47.226	132.762	76.703	Non
48 hpf	h17c3	47.226	160.23	76.703	Non
48 hpf	h17c3	47.226	179.805	76.703	Non
48 hpf	h17c3	47.226	193.701	76.703	Non
48 hpf	h17c3	47.226	210.791	76.703	Non
48 hpf	h17c3	46.091	235.61	74.866	Non
48 hpf	h17c3	46.091	246.217	74.866	Non
48 hpf	h17c3	46.091	237.446	74.866	Non
48 hpf	h17c4	50.684	126.608	82.337	Non
48 hpf	h17c4	50.684	147.032	82.337	Non
48 hpf	h17c4	50.684	174.949	82.337	Non
48 hpf	h17c4	50.684	196.404	82.337	Non
48 hpf	h17c4	50.684	224.343	82.316	Non
48 hpf	h17c4	50.684	234.653	82.316	Non
48 hpf	h17c4	50.684	245.711	82.316	Non
48 hpf	h17c4	50.684	254.82	82.316	Non
48 hpf	h17c4	50.684	250.988	82.316	Non
48 hpf	h17c4	50.684	244.105	82.316	Non
48 hpf	h17c5	43.335	116.66	70.385	Non
48 hpf	h17c5	43.335	133.327	70.385	Non
48 hpf	h17c5	43.335	151.211	70.385	Non
48 hpf	h17c5	43.335	161.453	70.385	Non
48 hpf	h17c5	43.335	167.536	70.385	Non
48 hpf	h17c5	43.335	179.813	70.385	Non
48 hpf	h17c5	43.335	203.246	70.385	Non
48 hpf	h17c5	43.66	254.206	70.922	Non
48 hpf	h17c5	43.66	260.563	70.922	Non
48 hpf	h17c5	43.66	246.962	70.922	Non
48 hpf	h1c1	43.011	86.523	69.851	Non
48 hpf	h1c1	43.011	102.525	69.851	Non
48 hpf	h1c1	43.011	121.774	69.851	Non
48 hpf	h1c1	43.011	131.75	69.851	Non
48 hpf	h1c1	43.011	138.291	69.851	Non
48 hpf	h1c1	43.011	147.546	69.851	Non
48 hpf	h1c1	42.255	174.277	68.63	Non
48 hpf	h1c1	42.255	204.205	68.63	Non
48 hpf	h1c1	42.255	233.879	68.63	Non
48 hpf	h1c1	42.363	278.568	68.812	Non
48 hpf	h1c1	42.363	322.658	68.812	Non
48 hpf	h1c1	42.363	355.417	68.812	Non
48 hpf	h1c2	47.172	97.99	76.624	Non
48 hpf	h1c2	47.172	119.557	76.624	Non
48 hpf	h1c2	47.172	134.317	76.624	Non
48 hpf	h1c2	47.172	146.272	76.624	Non
48 hpf	h1c2	47.172	161.343	76.624	Non
48 hpf	h1c2	47.172	184.751	76.624	Non
48 hpf	h1c2	47.064	231.552	76.441	Non
48 hpf	h1c2	47.064	259.648	76.441	Non
48 hpf	h1c2	47.064	282.74	76.441	Non
48 hpf	h1c2	47.064	291.878	76.441	Non
48 hpf	h1c3	43.227	111.405	70.194	Non
48 hpf	h1c3	43.227	128.388	70.194	Non
48 hpf	h1c3	43.227	147.642	70.194	Non
48 hpf	h1c3	43.227	167.87	70.194	Non
48 hpf	h1c3	43.227	191.547	70.194	Non
48 hpf	h1c3	43.227	224.214	70.194	Non
48 hpf	h1c3	43.227	255.683	70.194	Non
48 hpf	h1c3	43.227	284.864	70.194	Non
48 hpf	h1c3	43.227	333.331	70.194	Non
48 hpf	h1c4	49.333	94.831	80.131	Non
48 hpf	h1c4	49.333	114.955	80.131	Non
48 hpf	h1c4	49.333	128.874	80.131	Non
48 hpf	h1c4	49.333	140.267	80.131	Non
48 hpf	h1c4	49.333	153.4	80.131	Non
48 hpf	h1c4	49.333	176.174	80.131	Non
48 hpf	h1c4	49.333	202.135	80.131	Non
48 hpf	h1c4	49.333	224.486	80.131	Non
48 hpf	h1c4	45.713	281.504	74.249	Non
48 hpf	h1c4	45.713	303.322	74.249	Non
48 hpf	h1c4	45.713	313.226	74.249	Non
48 hpf	h1c5	38.959	119.189	63.258	Non
48 hpf	h1c5	38.959	150.522	63.258	Non
48 hpf	h1c5	38.959	166.173	63.258	Non
48 hpf	h1c5	38.959	176.922	63.258	Non
48 hpf	h1c5	38.959	192.817	63.258	Non
48 hpf	h1c5	38.959	221.527	63.258	Non
48 hpf	h1c5	38.959	249.967	63.258	Non
48 hpf	h1c5	38.959	283.259	63.258	Non
48 hpf	h1c5	38.959	311.562	63.258	Non
48 hpf	h1c5	38.959	343.531	63.258	Non
48 hpf	h2c1	36.473	81.829	59.217	Non
48 hpf	h2c1	36.473	94.385	59.217	Non
48 hpf	h2c1	36.473	110.814	59.217	Non
48 hpf	h2c1	36.473	119.296	59.217	Non
48 hpf	h2c1	36.473	121.373	59.217	Non
48 hpf	h2c1	36.473	127.356	59.217	Non
48 hpf	h2c1	36.473	136.219	59.217	Non
48 hpf	h2c1	37.23	186.739	60.462	Non
48 hpf	h2c1	37.23	197.935	60.462	Non
48 hpf	h2c1	37.23	203.54	60.462	Non
48 hpf	h2c1	37.23	212.346	60.462	Non
48 hpf	h2c2	43.714	110.295	70.996	Non
48 hpf	h2c2	43.714	131.176	70.996	Non
48 hpf	h2c2	43.714	137.045	70.996	Non
48 hpf	h2c2	43.714	139.151	70.996	Non
48 hpf	h2c2	42.579	153.13	69.152	Non
48 hpf	h2c2	42.579	157.801	69.152	Non
48 hpf	h2c2	42.579	154.409	69.152	Non
48 hpf	h2c2	42.579	152.412	69.152	Non
48 hpf	h2c2	44.902	238.697	72.939	Non
48 hpf	h2c2	44.902	239.743	72.939	Non
48 hpf	h2c2	44.902	222.268	72.939	Non
48 hpf	h2c2	44.902	211.496	72.939	Non
48 hpf	h2c3	44.632	104.912	72.48	Non
48 hpf	h2c3	44.632	130.3	72.48	Non
48 hpf	h2c3	44.632	142.128	72.48	Non
48 hpf	h2c3	44.632	150.534	72.48	Non
48 hpf	h2c3	44.632	161.651	72.48	Non
48 hpf	h2c3	44.632	182.562	72.48	Non
48 hpf	h2c3	46.199	237.706	75.042	Non
48 hpf	h2c3	46.199	261.667	75.042	Non
48 hpf	h2c3	46.199	263.754	75.042	Non
48 hpf	h2c4	34.744	119.051	56.406	Non
48 hpf	h2c4	34.744	143.459	56.406	Non
48 hpf	h2c4	34.744	153.305	56.406	Non
48 hpf	h2c4	34.744	161.811	56.406	Non
48 hpf	h2c4	34.744	175.749	56.406	Non
48 hpf	h2c4	35.933	204.226	58.341	Non
48 hpf	h2c4	35.933	235.009	58.341	Non
48 hpf	h2c4	35.933	250.584	58.341	Non
48 hpf	h2c4	35.933	258.719	58.341	Non
48 hpf	h2c4	35.933	269.327	58.341	Non
48 hpf	h2c5	42.363	110.156	68.785	Non
48 hpf	h2c5	42.363	135.02	68.785	Non
48 hpf	h2c5	42.363	145.998	68.785	Non
48 hpf	h2c5	42.363	149.73	68.785	Non
48 hpf	h2c5	42.363	158.628	68.785	Non
48 hpf	h2c5	42.363	171.831	68.785	Non
48 hpf	h2c5	44.092	209.051	71.613	Non
48 hpf	h2c5	44.092	242.692	71.613	Non
48 hpf	h2c5	44.092	262.998	71.613	Non
48 hpf	h2c5	44.092	266.375	71.613	Non
48 hpf	h2c5	44.092	267.644	71.613	Non
48 hpf	h3c1	47.874	94.978	77.758	Non
48 hpf	h3c1	47.874	117.193	77.758	Non
48 hpf	h3c1	47.874	141.25	77.758	Non
48 hpf	h3c1	47.874	161.055	77.758	Non
48 hpf	h3c1	47.874	179.947	77.758	Non
48 hpf	h3c1	47.874	203.149	77.758	Non
48 hpf	h3c1	47.874	227.875	77.758	Non
48 hpf	h3c1	47.874	243.713	77.758	Non
48 hpf	h3c1	48.199	298.622	78.286	Non
48 hpf	h3c1	48.199	336.279	78.286	Non
48 hpf	h3c1	48.199	359.66	78.286	Non
48 hpf	h3c2	42.039	119.841	68.273	Non
48 hpf	h3c2	42.039	144.225	68.273	Non
48 hpf	h3c2	42.039	163.059	68.273	Non
48 hpf	h3c2	41.822	186.501	67.904	Non
48 hpf	h3c2	41.822	225.503	67.904	Non
48 hpf	h3c2	41.822	247.633	67.904	Non
48 hpf	h3c2	41.822	273.29	67.904	Non
48 hpf	h3c2	41.822	301.656	67.904	Non
48 hpf	h3c2	41.822	327.462	67.904	Non
48 hpf	h3c2	41.822	340.96	67.904	Non
48 hpf	h3c3	50.522	92.761	82.06	Non
48 hpf	h3c3	50.522	109.258	82.06	Non
48 hpf	h3c3	50.522	129.255	82.06	Non
48 hpf	h3c3	50.522	146.754	82.06	Non
48 hpf	h3c3	50.522	160.541	82.06	Non
48 hpf	h3c3	50.522	172.723	82.06	Non
48 hpf	h3c3	50.522	182.346	82.06	Non
48 hpf	h3c3	50.522	202.804	82.06	Non
48 hpf	h3c3	50.522	231.624	82.06	Non
48 hpf	h3c3	50.522	264.53	82.06	Non
48 hpf	h3c3	48.09	297.448	78.112	Non
48 hpf	h3c3	48.09	302.991	78.112	Non
48 hpf	h3c3	48.09	301.746	78.112	Non
48 hpf	h3c4	54.737	94.864	88.918	Non
48 hpf	h3c4	54.737	109.772	88.918	Non
48 hpf	h3c4	54.737	128.037	88.918	Non
48 hpf	h3c4	54.737	147.343	88.918	Non
48 hpf	h3c4	54.737	166.907	88.918	Non
48 hpf	h3c4	54.466	188.887	88.474	Non
48 hpf	h3c4	54.466	206.498	88.474	Non
48 hpf	h3c4	54.466	238.798	88.474	Non
48 hpf	h3c4	54.466	288.48	88.474	Non
48 hpf	h3c4	54.466	329.49	88.474	Non
48 hpf	h3c4	54.466	348.524	88.474	Non
48 hpf	h3c4	54.466	357.52	88.474	Non
48 hpf	h4c1	45.659	102.349	74.152	Non
48 hpf	h4c1	45.659	127.022	74.152	Non
48 hpf	h4c1	45.659	145.386	74.152	Non
48 hpf	h4c1	45.659	153.535	74.152	Non
48 hpf	h4c1	45.659	157.566	74.152	Non
48 hpf	h4c1	45.659	163.476	74.152	Non
48 hpf	h4c1	45.659	168.358	74.152	Non
48 hpf	h4c1	45.659	171.916	74.152	Non
48 hpf	h4c1	45.767	177.592	74.341	Non
48 hpf	h4c1	45.767	188.522	74.341	Non
48 hpf	h4c1	45.767	204.14	74.341	Non
48 hpf	h4c1	45.767	220.636	74.341	Non
48 hpf	h4c1	45.767	231.238	74.341	Non
48 hpf	h4c2	50.252	104.24	81.645	Non
48 hpf	h4c2	50.252	130.149	81.645	Non
48 hpf	h4c2	50.252	151.492	81.645	Non
48 hpf	h4c2	50.252	163.343	81.645	Non
48 hpf	h4c2	50.252	171.647	81.645	Non
48 hpf	h4c2	50.252	191.102	81.645	Non
48 hpf	h4c2	50.252	222.935	81.645	Non
48 hpf	h4c2	50.252	245.413	81.645	Non
48 hpf	h4c2	50.252	263.602	81.645	Non
48 hpf	h4c3	51.495	107.846	83.658	Non
48 hpf	h4c3	51.495	130.56	83.658	Non
48 hpf	h4c3	51.495	147.433	83.658	Non
48 hpf	h4c3	51.495	162.539	83.658	Non
48 hpf	h4c3	51.495	178.689	83.658	Non
48 hpf	h4c3	51.495	198.072	83.658	Non
48 hpf	h4c3	51.495	214.62	83.658	Non
48 hpf	h4c3	51.495	226.556	83.658	Non
48 hpf	h4c3	51.495	242.214	83.658	Non
48 hpf	h4c3	51.495	253.727	83.658	Non
48 hpf	h4c3	51.495	264.609	83.658	Non
48 hpf	h4c4	51.495	107.846	83.658	Non
48 hpf	h4c4	51.495	130.56	83.658	Non
48 hpf	h4c4	51.495	147.433	83.658	Non
48 hpf	h4c4	51.495	162.539	83.658	Non
48 hpf	h4c4	51.495	178.689	83.658	Non
48 hpf	h4c4	51.495	198.072	83.658	Non
48 hpf	h4c4	51.495	214.62	83.658	Non
48 hpf	h4c4	51.495	226.556	83.658	Non
48 hpf	h4c4	51.495	242.214	83.658	Non
48 hpf	h4c4	51.495	253.727	83.658	Non
48 hpf	h4c4	51.495	264.609	83.658	Non
48 hpf	h4c5	48.469	116.884	78.724	Non
48 hpf	h4c5	48.469	136.588	78.724	Non
48 hpf	h4c5	48.469	149.516	78.724	Non
48 hpf	h4c5	48.469	155.889	78.724	Non
48 hpf	h4c5	48.469	165.799	78.724	Non
48 hpf	h4c5	48.469	182.777	78.724	Non
48 hpf	h4c5	47.928	225.954	77.863	Non
48 hpf	h4c5	47.928	241.723	77.863	Non
48 hpf	h4c5	47.928	261.902	77.863	Non
48 hpf	h4c5	47.928	272.247	77.863	Non
48 hpf	h4c5	47.928	291.294	77.863	Non
48 hpf	h5c1	50.684	88.827	82.333	Non
48 hpf	h5c1	50.684	110.108	82.333	Non
48 hpf	h5c1	50.684	120.738	82.333	Non
48 hpf	h5c1	50.684	126.283	82.333	Non
[truncated: 851 more rows]
