# Supplementary material for: Stepwise polarisation of developing bilayered epidermis is mediated by aPKC and E-cadherin in zebrafish
Source: eLife. 2020 Jan 22;9:e49064. doi: 10.7554/eLife.49064 (PMC6975926; doi:10.7554/eLife.49064)
Supplement: Figure 1—source data 2. [file elife-49064-fig1-data2.csv]

Genotype	Cell name	Area	Mean	Length	Boundary
24 hpf	h1c1	50.954	185.214	82.759	Non	Genotype= Stage for this data
24 hpf	h1c1	50.954	170.458	82.759	Non
24 hpf	h1c1	50.954	151.25	82.759	Non
24 hpf	h1c1	50.954	139.494	82.759	Non
24 hpf	h1c1	50.954	123.301	82.759	Non
24 hpf	h1c2	72.838	220.413	118.367	Non
24 hpf	h1c2	72.838	211.882	118.367	Non
24 hpf	h1c2	72.838	182.542	118.367	Non
24 hpf	h1c2	56.033	146.22	91.044	Non
24 hpf	h1c2	56.033	128.8	91.044	Non
24 hpf	h1c2	56.033	119.388	91.044	Non
24 hpf	h1c2	56.033	113.014	91.044	Non
24 hpf	h2c1	70.19	151.315	114.037	Non
24 hpf	h2c1	70.19	138.625	114.037	Non
24 hpf	h2c1	70.19	123.55	114.037	Non
24 hpf	h2c1	70.19	112.937	114.037	Non
24 hpf	h2c1	70.19	104.195	114.037	Non
24 hpf	h2c1	70.19	98.726	114.037	Non
24 hpf	h2c1	70.19	90.571	114.037	Non
24 hpf	h2c2	54.088	153.921	87.877	Non
24 hpf	h2c2	54.088	166.293	87.877	Non
24 hpf	h2c2	58.951	188.636	95.769	Non
24 hpf	h2c2	58.951	180.66	95.769	Non
24 hpf	h2c2	58.951	165.98	95.769	Non
24 hpf	h2c2	58.951	153.085	95.769	Non
24 hpf	h2c2	58.951	138.509	95.769	Non
24 hpf	h3c1	44.632	168.032	72.484	Non
24 hpf	h3c1	44.632	173.486	72.484	Non
24 hpf	h3c1	44.632	179.272	72.484	Non
24 hpf	h3c1	44.632	180.715	72.484	Non
24 hpf	h3c1	44.632	169.87	72.484	Non
24 hpf	h3c1	44.632	155.219	72.484	Non
24 hpf	h3c1	44.632	138.439	72.484	Non
24 hpf	h3c1	42.903	130.426	69.688	Non
24 hpf	h3c1	42.903	114.84	69.688	Non
24 hpf	h3c2	30.529	179.841	49.57	Non
24 hpf	h3c2	36.095	201.502	58.621	Non
24 hpf	h3c2	36.527	164.706	59.308	Non
24 hpf	h3c2	32.042	157.551	52.007	Non
24 hpf	h4c1	49.82	183.678	80.928	Non
24 hpf	h4c1	49.82	177.04	80.928	Non
24 hpf	h4c1	49.82	168.993	80.928	Non
24 hpf	h4c1	49.82	154.849	80.928	Non
24 hpf	h4c1	49.82	138.753	80.928	Non
24 hpf	h4c1	49.82	121.18	80.928	Non
24 hpf	h4c2	53.008	222.861	86.109	Non
24 hpf	h4c2	53.008	219.071	86.109	Non
24 hpf	h4c2	53.008	207.759	86.109	Non
24 hpf	h4c2	53.008	180.151	86.109	Non
24 hpf	h4c2	59.005	169.41	95.852	Non
24 hpf	h4c2	59.005	151.044	95.852	Non
24 hpf	h4c2	59.005	132.755	95.852	Non
24 hpf	h4c2	59.005	115.042	95.852	Non
24 hpf	h4c2	59.005	101.042	95.852	Non
24 hpf	h4c2	59.005	92.795	95.852	Non
24 hpf	h5c1	47.874	256.773	77.76	Non
24 hpf	h5c1	47.874	267.083	77.76	Non
24 hpf	h5c1	47.874	266.386	77.76	Non
24 hpf	h5c1	47.874	256.672	77.76	Non
24 hpf	h5c1	47.874	247.393	77.76	Non
24 hpf	h5c1	47.874	216.678	77.76	Non
24 hpf	h5c1	47.874	182.871	77.76	Non
24 hpf	h5c1	47.874	156.685	77.76	Non
24 hpf	h5c1	47.874	138.844	77.76	Non
24 hpf	h5c2	63.436	205.598	103.077	Non
24 hpf	h5c2	63.436	198.853	103.077	Non
24 hpf	h5c2	63.436	191.752	103.077	Non
24 hpf	h5c2	63.436	184.628	103.077	Non
24 hpf	h5c2	63.436	163.349	103.077	Non
24 hpf	h5c2	63.436	139.26	103.077	Non
24 hpf	h5c2	63.436	123	103.077	Non
24 hpf	h5c2	63.436	111.582	103.077	Non
24 hpf	h5c3	58.465	243.862	94.991	Non
24 hpf	h5c3	58.465	245.138	94.991	Non
24 hpf	h5c3	58.465	245.911	94.991	Non
24 hpf	h5c3	59.6	237.614	96.811	Non
24 hpf	h5c3	59.6	210.597	96.811	Non
24 hpf	h5c3	59.6	183.431	96.811	Non
24 hpf	h5c3	59.6	162.299	96.811	Non
24 hpf	h5c3	59.6	135.255	96.811	Non
24 hpf	h5c3	59.6	115.67	96.811	Non
24 hpf	h5c3	59.6	105.438	96.811	Non
24 hpf	h5c3	59.6	94.978	96.811	Non
24 hpf	h6c1	39.067	197.697	63.444	Non
24 hpf	h6c1	41.444	196.699	67.315	Non
24 hpf	h6c1	41.444	203.916	67.315	Non
24 hpf	h6c1	71.109	181.907	115.557	Non
24 hpf	h6c1	71.109	176.688	115.557	Non
24 hpf	h6c1	71.109	158.322	115.557	Non
24 hpf	h6c1	71.109	134.614	115.557	Non
24 hpf	h6c1	71.109	119.992	115.557	Non
24 hpf	h6c2	53.656	188.848	87.173	Non
24 hpf	h6c2	53.656	187.803	87.173	Non
24 hpf	h6c2	53.656	175.134	87.173	Non
24 hpf	h6c2	59.113	160.093	96.03	Non
24 hpf	h6c2	59.113	144.888	96.03	Non
24 hpf	h6c2	59.113	128.277	96.03	Non
24 hpf	h6c2	59.113	115.725	96.03	Non
24 hpf	h6c2	59.113	102.651	96.03	Non
24 hpf	h7c1	18.48	187.919	29.959	Non
24 hpf	h7c1	25.882	201.108	42.005	Non
24 hpf	h7c1	25.882	199.397	42.005	Non
24 hpf	h7c1	25.882	202.79	42.005	Non
24 hpf	h7c1	43.876	199.932	71.249	Non
24 hpf	h7c1	43.876	207.548	71.249	Non
24 hpf	h7c1	43.876	204.024	71.249	Non
24 hpf	h7c1	45.335	198.878	73.634	Non
24 hpf	h7c1	45.335	180.959	73.634	Non
24 hpf	h7c1	49.333	180.587	80.14	Non
24 hpf	h7c1	49.333	166.435	80.14	Non
24 hpf	h7c1	49.333	154.12	80.14	Non
24 hpf	h7c1	49.333	138.095	80.14	Non
24 hpf	h7c1	49.333	119.306	80.14	Non
24 hpf	h7c1	49.333	107.745	80.14	Non
24 hpf	h7c2	50.036	161.108	81.278	Non
24 hpf	h7c2	50.036	154.305	81.278	Non
24 hpf	h7c2	50.036	142.06	81.278	Non
24 hpf	h7c2	50.036	129.814	81.278	Non
24 hpf	h7c2	50.468	126.451	81.98	Non
24 hpf	h7c2	50.468	123.889	81.98	Non
24 hpf	h7c2	50.468	116.456	81.98	Non
24 hpf	h7c2	50.468	106.026	81.98	Non
24 hpf	h7c2	50.468	96.121	81.98	Non
24 hpf	h7c2	50.468	87.811	81.98	Non
24 hpf	h7c2	50.468	83.219	81.98	Non
24 hpf	h8c1	64.247	173.959	104.388	Non
24 hpf	h8c1	64.247	164.532	104.388	Non
24 hpf	h8c1	64.247	148.755	104.388	Non
24 hpf	h8c1	64.463	141.876	104.735	Non
24 hpf	h8c1	64.463	132.319	104.735	Non
24 hpf	h8c1	64.463	122.766	104.735	Non
24 hpf	h8c2	43.714	161.013	70.984	Non
24 hpf	h8c2	43.714	160.83	70.984	Non
24 hpf	h8c2	43.714	147.131	70.984	Non
24 hpf	h8c2	43.714	130.118	70.984	Non
24 hpf	h8c2	43.714	116.299	70.984	Non
24 hpf	h8c2	43.714	105.879	70.984	Non
24 hpf	h9c1	50.738	157.796	82.41	Non
24 hpf	h9c1	50.738	163.099	82.41	Non
24 hpf	h9c1	52.899	161.781	85.92	Non
24 hpf	h9c1	52.899	155.373	85.92	Non
24 hpf	h9c1	52.899	144.067	85.92	Non
24 hpf	h9c1	54.304	161.408	88.225	Non
24 hpf	h9c1	54.304	154.061	88.225	Non
24 hpf	h9c1	56.52	146.798	91.818	Non
24 hpf	h9c1	56.52	134.45	91.818	Non
24 hpf	h9c1	56.52	116.562	91.818	Non
24 hpf	h9c1	56.52	101.149	91.818	Non
24 hpf	h9c1	56.52	93.248	91.818	Non
24 hpf	h9c2	55.277	155.304	89.794	Non
24 hpf	h9c2	55.277	144.437	89.794	Non
24 hpf	h9c2	55.277	134.574	89.794	Non
24 hpf	h9c2	55.277	122.751	89.794	Non
24 hpf	h9c2	55.277	111.032	89.794	Non
24 hpf	h9c2	57.168	106.369	92.872	Non
24 hpf	h9c2	57.168	98.442	92.872	Non
24 hpf	h9c2	57.168	92.112	92.872	Non
24 hpf	h9c2	57.168	85.927	92.872	Non
24 hpf	h9c2	57.168	85.927	92.872	Non
24 hpf	h10c1	66.138	153.281	107.458	Non
24 hpf	h10c1	66.138	158.453	107.458	Non
24 hpf	h10c1	66.138	155.141	107.458	Non
24 hpf	h10c1	66.138	145.094	107.458	Non
24 hpf	h10c1	65.381	126.62	106.228	Non
24 hpf	h10c1	65.381	115.097	106.228	Non
24 hpf	h10c1	65.381	106.977	106.228	Non
24 hpf	h10c1	65.381	99.614	106.228	Non
24 hpf	h10c1	65.381	92.832	106.228	Non
24 hpf	h10c2	52.197	207.162	84.785	Non
24 hpf	h10c2	52.197	198.471	84.785	Non
24 hpf	h10c2	52.197	179.549	84.785	Non
24 hpf	h10c2	52.197	154.807	84.785	Non
24 hpf	h10c2	52.197	131.582	84.785	Non
24 hpf	h10c2	52.197	117.772	84.785	Non
24 hpf	h10c2	52.197	106.452	84.785	Non
24 hpf	h10c2	52.197	95.453	84.785	Non
24 hpf	h10c3	55.223	182.578	89.717	Non
24 hpf	h10c3	55.223	178.257	89.717	Non
24 hpf	h10c3	55.223	162.804	89.717	Non
24 hpf	h10c3	55.223	145.712	89.717	Non
24 hpf	h10c3	55.223	134.358	89.717	Non
24 hpf	h10c3	55.223	122.581	89.717	Non
24 hpf	h10c3	55.223	110.003	89.717	Non
24 hpf	h10c3	55.223	97.979	89.717	Non
36 hpf	h1c1	45.227	207.362	73.453	Non
36 hpf	h1c1	45.227	206.276	73.453	Non
36 hpf	h1c1	45.227	193.483	73.453	Non
36 hpf	h1c1	45.227	173.424	73.453	Non
36 hpf	h1c1	45.227	151.103	73.453	Non
36 hpf	h1c1	45.227	128.876	73.453	Non
36 hpf	h1c1	45.227	119.333	73.453	Non
36 hpf	h1c2	38.526	229.807	62.56	Non
36 hpf	h1c2	38.526	230.602	62.56	Non
36 hpf	h1c2	38.526	222.503	62.56	Non
36 hpf	h1c2	38.526	213.681	62.56	Non
36 hpf	h1c2	38.526	203.403	62.56	Non
36 hpf	h1c2	38.526	178.926	62.56	Non
36 hpf	h1c2	38.526	164.963	62.56	Non
36 hpf	h1c3	38.31	212.56	62.214	Non
36 hpf	h1c3	38.31	187.684	62.214	Non
36 hpf	h1c3	38.31	166.054	62.214	Non
36 hpf	h1c3	38.31	151.672	62.214	Non
36 hpf	h1c3	38.31	137.763	62.214	Non
36 hpf	h1c3	38.31	115.873	62.214	Non
36 hpf	h1c3	38.31	106.092	62.214	Non
36 hpf	h1c3	38.31	98.711	62.214	Non
36 hpf	h1c4	54.304	180.764	88.21	Non
36 hpf	h1c4	54.304	175.815	88.21	Non
36 hpf	h1c4	54.304	159.831	88.21	Non
36 hpf	h1c4	54.304	146.111	88.21	Non
36 hpf	h1c4	54.304	134.659	88.21	Non
36 hpf	h1c4	54.304	124.531	88.21	Non
36 hpf	h1c4	54.304	107.615	88.21	Non
36 hpf	h2c1	47.172	276.765	76.614	Non
36 hpf	h2c1	47.172	264.234	76.614	Non
36 hpf	h2c1	47.172	235.938	76.614	Non
36 hpf	h2c1	47.172	211.405	76.614	Non
36 hpf	h2c1	47.172	184.906	76.614	Non
36 hpf	h2c1	47.172	155.294	76.614	Non
36 hpf	h2c1	47.172	127.074	76.614	Non
36 hpf	h2c2	43.389	229.23	70.482	Non
36 hpf	h2c2	43.389	225.909	70.482	Non
36 hpf	h2c2	43.389	219.611	70.482	Non
36 hpf	h2c2	43.389	208.562	70.482	Non
36 hpf	h2c2	43.389	195.224	70.482	Non
36 hpf	h2c2	43.389	169.943	70.482	Non
36 hpf	h2c2	43.389	147.016	70.482	Non
36 hpf	h3c1	50.198	193.579	81.55	Non
36 hpf	h3c1	48.685	187.172	79.085	Non
36 hpf	h3c1	48.685	160.559	79.085	Non
36 hpf	h3c1	48.685	134.279	79.085	Non
36 hpf	h3c1	48.685	110.233	79.085	Non
36 hpf	h3c1	48.685	100.964	79.085	Non
36 hpf	h3c2	36.743	267.329	59.652	Non
36 hpf	h3c2	36.743	251.106	59.652	Non
36 hpf	h3c2	43.227	227.43	70.201	Non
36 hpf	h3c2	43.227	196.831	70.201	Non
36 hpf	h3c2	43.227	158.58	70.201	Non
36 hpf	h3c2	43.227	138.178	70.201	Non
36 hpf	h3c2	43.227	122.52	70.201	Non
36 hpf	h3c3	41.228	223.793	66.958	Non
36 hpf	h3c3	41.228	223.159	66.958	Non
36 hpf	h3c3	42.039	223.395	68.272	Non
36 hpf	h3c3	42.039	212.394	68.272	Non
36 hpf	h3c3	42.039	196.508	68.272	Non
36 hpf	h3c3	42.039	175.476	68.272	Non
36 hpf	h3c3	42.039	164.156	68.272	Non
36 hpf	h3c3	42.039	150.911	68.272	Non
36 hpf	h4c1	57.114	367.611	92.789	Non
36 hpf	h4c1	57.114	364.657	92.789	Non
36 hpf	h4c1	57.114	341.936	92.789	Non
36 hpf	h4c1	51.549	366.968	83.748	Non
36 hpf	h4c1	51.549	343.706	83.748	Non
36 hpf	h4c1	51.549	310.601	83.748	Non
36 hpf	h4c1	51.008	289.138	82.862	Non
36 hpf	h4c1	51.008	253.427	82.862	Non
36 hpf	h4c1	51.008	225.161	82.862	Non
36 hpf	h4c1	51.008	197.022	82.862	Non
36 hpf	h4c1	51.008	167.653	82.862	Non
36 hpf	h4c2	52.089	236.395	84.613	Non
36 hpf	h4c2	52.089	233.19	84.613	Non
36 hpf	h4c2	53.44	233.381	86.799	Non
36 hpf	h4c2	53.44	227.848	86.799	Non
36 hpf	h4c2	53.44	220.069	86.799	Non
36 hpf	h4c2	53.44	205.765	86.799	Non
36 hpf	h4c2	53.44	193.507	86.799	Non
36 hpf	h4c2	53.44	181.694	86.799	Non
36 hpf	h4c3	51.332	240.133	83.397	Non
36 hpf	h4c3	51.332	247.833	83.397	Non
36 hpf	h4c3	50.738	243.557	82.414	Non
36 hpf	h4c3	50.738	236.127	82.414	Non
36 hpf	h4c3	50.738	222.071	82.414	Non
36 hpf	h4c3	50.738	199.653	82.414	Non
36 hpf	h4c3	50.738	184.04	82.414	Non
36 hpf	h4c3	50.738	164.694	82.414	Non
36 hpf	h4c3	50.738	147.181	82.414	Non
36 hpf	h4c3	50.738	129.82	82.414	Non
36 hpf	h4c4	39.337	273.637	63.885	Non
36 hpf	h4c4	39.337	271.039	63.885	Non
36 hpf	h4c4	39.337	255.908	63.885	Non
36 hpf	h4c4	39.337	238.156	63.885	Non
36 hpf	h4c4	39.337	212.582	63.885	Non
36 hpf	h4c4	39.337	197.587	63.885	Non
36 hpf	h4c4	39.337	186.632	63.885	Non
36 hpf	h4c4	39.337	175.192	63.885	Non
36 hpf	h4c4	39.337	157.648	63.885	Non
36 hpf	h5c1	44.956	231.41	73.021	Non
36 hpf	h5c1	44.956	254.751	73.021	Non
36 hpf	h5c1	44.956	260.961	73.021	Non
36 hpf	h5c1	44.956	254.32	73.021	Non
36 hpf	h5c1	44.956	233.724	73.021	Non
36 hpf	h5c1	44.956	208.007	73.021	Non
36 hpf	h5c1	44.956	189.228	73.021	Non
36 hpf	h5c1	44.956	168.922	73.021	Non
36 hpf	h5c2	41.12	227.538	66.773	Non
36 hpf	h5c2	41.12	237.617	66.773	Non
36 hpf	h5c2	41.12	231.575	66.773	Non
36 hpf	h5c2	48.199	258.782	78.277	Non
36 hpf	h5c2	48.199	247.981	78.277	Non
36 hpf	h5c2	48.199	231.909	78.277	Non
36 hpf	h5c2	48.199	209.084	78.277	Non
36 hpf	h5c2	48.199	184.577	78.277	Non
36 hpf	h5c2	48.199	166.789	78.277	Non
36 hpf	h5c3	47.064	237.018	76.432	Non
36 hpf	h5c3	47.064	244.081	76.432	Non
36 hpf	h5c3	47.064	233.36	76.432	Non
36 hpf	h5c3	47.064	214.771	76.432	Non
36 hpf	h5c3	45.065	210.311	73.193	Non
36 hpf	h5c3	45.065	185.574	73.193	Non
36 hpf	h5c3	45.065	163.629	73.193	Non
36 hpf	h5c3	45.065	150.327	73.193	Non
36 hpf	h5c3	45.065	139.504	73.193	Non
36 hpf	h5c4	40.418	209.646	65.643	Non
36 hpf	h5c4	40.418	223.722	65.643	Non
36 hpf	h5c4	40.418	220.678	65.643	Non
36 hpf	h5c4	40.418	203.382	65.643	Non
36 hpf	h5c4	40.418	178.774	65.643	Non
36 hpf	h5c4	40.418	154.222	65.643	Non
36 hpf	h5c4	40.418	141.125	65.643	Non
36 hpf	h5c4	40.418	119.763	65.643	Non
36 hpf	h5c4	40.418	103.884	65.643	Non
36 hpf	h6c1	66.516	305.719	108.083	Non
36 hpf	h6c1	66.516	273.782	108.083	Non
36 hpf	h6c1	66.516	220.048	108.083	Non
36 hpf	h6c1	66.516	168.945	108.083	Non
36 hpf	h6c1	66.516	146.593	108.083	Non
36 hpf	h6c2	41.498	349.283	67.406	Non
36 hpf	h6c2	41.498	341.343	67.406	Non
36 hpf	h6c2	41.498	303.812	67.406	Non
36 hpf	h6c2	41.498	246.953	67.406	Non
36 hpf	h6c2	41.498	192.746	67.406	Non
36 hpf	h6c2	45.605	191.872	74.057	Non
36 hpf	h6c2	45.605	160.33	74.057	Non
36 hpf	h6c3	41.985	312.194	68.195	Non
36 hpf	h6c3	41.985	301.178	68.195	Non
36 hpf	h6c3	41.985	251.745	68.195	Non
36 hpf	h6c3	41.985	214.853	68.195	Non
36 hpf	h6c3	41.985	179.15	68.195	Non
36 hpf	h6c3	41.985	153.936	68.195	Non
36 hpf	h6c4	56.142	273.827	91.195	Non
36 hpf	h6c4	56.142	250.731	91.195	Non
36 hpf	h6c4	56.142	221.509	91.195	Non
36 hpf	h6c4	50.792	237.477	82.519	Non
36 hpf	h6c4	50.792	209.075	82.519	Non
36 hpf	h6c4	50.792	186.133	82.519	Non
36 hpf	h6c4	50.792	157.204	82.519	Non
36 hpf	h6c4	50.792	136.164	82.519	Non
36 hpf	h7c1	49.711	183.64	80.752	Non
36 hpf	h7c1	49.711	183.948	80.752	Non
36 hpf	h7c1	49.711	178.276	80.752	Non
36 hpf	h7c1	49.711	169.892	80.752	Non
36 hpf	h7c1	49.711	157.924	80.752	Non
36 hpf	h7c1	49.711	146.521	80.752	Non
36 hpf	h7c1	49.711	135.86	80.752	Non
36 hpf	h7c1	49.711	128.44	80.752	Non
36 hpf	h7c2	42.471	181.625	68.978	Non
36 hpf	h7c2	45.281	184.044	73.522	Non
36 hpf	h7c2	45.281	181.464	73.522	Non
36 hpf	h7c2	43.173	192.231	70.11	Non
36 hpf	h7c2	43.173	176.658	70.11	Non
36 hpf	h7c2	43.173	158.804	70.11	Non
36 hpf	h7c2	43.173	141.335	70.11	Non
36 hpf	h7c3	56.412	196.51	91.639	Non
36 hpf	h7c3	56.412	201.093	91.639	Non
36 hpf	h7c3	56.412	193.847	91.639	Non
36 hpf	h7c3	56.412	175.334	91.639	Non
36 hpf	h7c3	56.412	151.564	91.639	Non
36 hpf	h7c3	56.412	133.905	91.639	Non
36 hpf	h8c1	41.012	217.778	66.597	Non
36 hpf	h8c1	41.012	226.103	66.597	Non
36 hpf	h8c1	41.012	224.478	66.597	Non
36 hpf	h8c1	41.012	203.634	66.597	Non
36 hpf	h8c1	39.607	197.345	64.299	Non
36 hpf	h8c1	39.607	170.713	64.299	Non
36 hpf	h8c1	39.607	149.534	64.299	Non
36 hpf	h8c1	39.607	132.779	64.299	Non
36 hpf	h8c2	51.657	260.633	83.916	Non
36 hpf	h8c2	51.657	263.699	83.916	Non
36 hpf	h8c2	51.657	250.534	83.916	Non
36 hpf	h8c2	51.657	219.446	83.916	Non
36 hpf	h8c2	53.872	196.783	87.516	Non
36 hpf	h8c2	53.872	168.918	87.516	Non
36 hpf	h8c2	53.872	146.247	87.516	Non
36 hpf	h8c2	53.872	128.888	87.516	Non
36 hpf	h8c2	53.872	109.957	87.516	Non
36 hpf	h8c3	53.278	216.176	86.559	Non
36 hpf	h8c3	53.278	213.991	86.559	Non
36 hpf	h8c3	53.278	207.179	86.559	Non
36 hpf	h8c3	53.278	192.808	86.559	Non
36 hpf	h8c3	53.278	170.903	86.559	Non
36 hpf	h8c3	53.278	154.406	86.559	Non
36 hpf	h8c4	50.738	220.858	82.414	Non
36 hpf	h8c4	50.738	211.236	82.414	Non
36 hpf	h8c4	50.738	184.047	82.414	Non
36 hpf	h8c4	50.738	158.438	82.414	Non
36 hpf	h8c4	50.738	138.763	82.414	Non
36 hpf	h8c4	50.738	123.534	82.414	Non
48 hpf	h1c1	43.498	393.842	70.649	Non
48 hpf	h1c1	43.498	395.366	70.649	Non
48 hpf	h1c1	43.498	356.745	70.649	Non
48 hpf	h1c1	44.794	329.698	72.76	Non
48 hpf	h1c1	44.794	276.414	72.76	Non
48 hpf	h1c1	44.794	226.653	72.76	Non
48 hpf	h1c1	44.794	187.523	72.76	Non
48 hpf	h1c1	44.794	164.619	72.76	Non
48 hpf	h1c2	35.122	315.669	57.027	Non
48 hpf	h1c2	35.122	336.231	57.027	Non
48 hpf	h1c2	35.122	333.335	57.027	Non
48 hpf	h1c2	37.932	348.493	61.598	Non
48 hpf	h1c2	37.932	314.104	61.598	Non
48 hpf	h1c2	37.932	273.346	61.598	Non
48 hpf	h1c2	37.932	242.591	61.598	Non
48 hpf	h1c2	37.932	230.917	61.598	Non
48 hpf	h1c3	53.116	330.13	86.293	Non
48 hpf	h1c3	53.116	371.064	86.293	Non
48 hpf	h1c3	55.277	412.012	89.808	Non
48 hpf	h1c3	55.277	358.617	89.808	Non
48 hpf	h1c3	55.277	288.781	89.808	Non
48 hpf	h1c3	55.277	223.556	89.808	Non
48 hpf	h1c3	55.277	164.704	89.808	Non
48 hpf	h1c3	55.277	136.304	89.808	Non
48 hpf	h1c3	55.277	119.93	89.808	Non
48 hpf	h1c4	42.309	450.463	68.705	Non
48 hpf	h1c4	42.309	436.589	68.705	Non
48 hpf	h1c4	42.309	358.51	68.705	Non
48 hpf	h1c4	44.308	298.992	71.964	Non
48 hpf	h1c4	44.308	238.218	71.964	Non
48 hpf	h1c4	44.308	197.577	71.964	Non
48 hpf	h1c4	44.308	167.411	71.964	Non
48 hpf	h1c4	44.308	151.435	71.964	Non
48 hpf	h1c4	44.308	136.273	71.964	Non
48 hpf	h2c1	40.364	292.007	65.549	Non
48 hpf	h2c1	40.364	324.117	65.549	Non
48 hpf	h2c1	40.364	350.769	65.549	Non
48 hpf	h2c1	39.823	329.014	64.66	Non
48 hpf	h2c1	40.364	311.112	65.555	Non
48 hpf	h2c1	40.364	251.852	65.555	Non
48 hpf	h2c1	40.364	190.652	65.555	Non
48 hpf	h2c1	40.364	163.328	65.555	Non
48 hpf	h2c1	40.364	145.707	65.555	Non
48 hpf	h2c1	40.364	122.265	65.555	Non
48 hpf	h2c1	40.364	110.872	65.555	Non
48 hpf	h2c2	31.016	269.58	50.352	Non
48 hpf	h2c2	31.016	290.898	50.352	Non
48 hpf	h2c2	32.799	293.022	53.242	Non
48 hpf	h2c2	32.799	278.698	53.242	Non
48 hpf	h2c2	31.988	282.512	51.93	Non
48 hpf	h2c2	31.988	247.622	51.93	Non
48 hpf	h2c2	31.988	212.46	51.93	Non
48 hpf	h2c2	31.988	192.723	51.93	Non
48 hpf	h2c2	31.988	179.501	51.93	Non
48 hpf	h2c2	31.988	160.77	51.93	Non
48 hpf	h2c2	31.988	145.747	51.93	Non
48 hpf	h2c3	31.988	317.985	51.93	Non
48 hpf	h2c3	31.988	304.189	51.93	Non
48 hpf	h2c3	31.988	282.512	51.93	Non
48 hpf	h2c3	32.042	257.007	52.006	Non
48 hpf	h2c3	32.042	219.948	52.006	Non
48 hpf	h2c3	32.042	198.843	52.006	Non
48 hpf	h2c3	32.042	183.967	52.006	Non
48 hpf	h2c3	32.042	163.628	52.006	Non
48 hpf	h2c4	32.096	220.139	52.098	Non
48 hpf	h2c4	32.096	228.196	52.098	Non
48 hpf	h2c4	32.096	231.517	52.098	Non
48 hpf	h2c4	32.204	226.04	52.277	Non
48 hpf	h2c4	32.204	221.716	52.277	Non
48 hpf	h2c4	32.204	202.281	52.277	Non
48 hpf	h2c4	34.312	201.035	55.711	Non
48 hpf	h2c4	34.312	184.646	55.711	Non
48 hpf	h2c4	34.312	173.501	55.711	Non
48 hpf	h2c4	34.312	158.674	55.711	Non
48 hpf	h2c4	34.312	142.467	55.711	Non
48 hpf	h2c4	34.312	128.455	55.711	Non
48 hpf	h2c5	41.714	250.646	67.739	Non
48 hpf	h2c5	41.714	264.356	67.739	Non
48 hpf	h2c5	41.714	264.995	67.739	Non
48 hpf	h2c5	43.876	294.334	71.24	Non
48 hpf	h2c5	43.876	274.715	71.24	Non
48 hpf	h2c5	43.876	250.117	71.24	Non
48 hpf	h2c5	43.876	231.006	71.24	Non
48 hpf	h2c5	43.876	202.267	71.24	Non
48 hpf	h2c5	43.876	173.175	71.24	Non
48 hpf	h2c5	43.876	149.401	71.24	Non
48 hpf	h2c6	40.958	259.253	66.526	Non
48 hpf	h2c6	40.958	260.839	66.526	Non
48 hpf	h2c6	40.958	254.747	66.526	Non
48 hpf	h2c6	39.445	300.331	64.057	Non
48 hpf	h2c6	39.445	302.012	64.057	Non
48 hpf	h2c6	39.445	292.879	64.057	Non
48 hpf	h2c6	39.445	277.946	64.057	Non
48 hpf	h2c6	39.445	252.371	64.057	Non
48 hpf	h2c6	39.445	216.237	64.057	Non
48 hpf	h2c6	39.445	184.496	64.057	Non
48 hpf	h3c1	48.523	353.541	78.811	Non
48 hpf	h3c1	48.523	359.749	78.811	Non
48 hpf	h3c1	48.523	338.729	78.811	Non
48 hpf	h3c1	49.549	317.26	80.486	Non
48 hpf	h3c1	49.549	278.115	80.486	Non
48 hpf	h3c1	49.549	228.737	80.486	Non
48 hpf	h3c1	49.549	192.902	80.486	Non
48 hpf	h3c2	41.552	451.488	67.492	Non
48 hpf	h3c2	41.552	471.177	67.492	Non
48 hpf	h3c2	42.741	481.647	69.404	Non
48 hpf	h3c2	42.741	464.149	69.404	Non
48 hpf	h3c2	42.741	416.065	69.404	Non
48 hpf	h3c2	42.741	368.737	69.404	Non
48 hpf	h3c2	42.741	327.463	69.404	Non
48 hpf	h3c2	42.741	284.323	69.404	Non
48 hpf	h3c2	42.741	249.733	69.404	Non
48 hpf	h3c3	45.659	399.874	74.162	Non
48 hpf	h3c3	45.659	406.901	74.162	Non
48 hpf	h3c3	45.659	396.496	74.162	Non
48 hpf	h3c3	45.659	364.667	74.162	Non
48 hpf	h3c3	45.659	322.841	74.162	Non
48 hpf	h3c3	45.659	290.311	74.162	Non
48 hpf	h3c3	45.659	256.51	74.162	Non
48 hpf	h3c4	42.255	342.286	68.622	Non
48 hpf	h3c4	42.255	373.281	68.622	Non
48 hpf	h3c4	42.255	369.81	68.622	Non
48 hpf	h3c4	41.12	416.684	66.771	Non
48 hpf	h3c4	41.12	410.419	66.771	Non
48 hpf	h3c4	41.12	372.966	66.771	Non
48 hpf	h3c4	41.12	316.667	66.771	Non
48 hpf	h3c4	41.12	279.975	66.771	Non
48 hpf	h3c4	41.12	263.288	66.771	Non
48 hpf	h3c4	41.12	249.199	66.771	Non
48 hpf	h4c1	39.931	289.345	64.857	Non
48 hpf	h4c1	39.931	306.426	64.857	Non
48 hpf	h4c1	39.931	304.787	64.857	Non
48 hpf	h4c1	41.444	332.077	67.306	Non
48 hpf	h4c1	41.444	307.848	67.306	Non
48 hpf	h4c1	41.444	267.531	67.306	Non
48 hpf	h4c1	41.444	227.292	67.306	Non
48 hpf	h4c1	41.444	204.442	67.306	Non
48 hpf	h4c2	48.253	320.127	78.37	Non
48 hpf	h4c2	48.253	329.208	78.37	Non
48 hpf	h4c2	48.253	313.756	78.37	Non
48 hpf	h4c2	48.469	334.149	78.725	Non
48 hpf	h4c2	48.469	308.987	78.725	Non
48 hpf	h4c2	48.469	267.759	78.725	Non
48 hpf	h4c2	48.469	228.692	78.725	Non
48 hpf	h4c2	48.469	199.274	78.725	Non
48 hpf	h4c2	48.469	189.061	78.725	Non
48 hpf	h4c2	48.469	188.239	78.725	Non
48 hpf	h4c3	35.609	338.019	57.818	Non
48 hpf	h4c3	35.609	348.016	57.818	Non
48 hpf	h4c3	35.609	347.284	57.818	Non
48 hpf	h4c3	35.609	334.357	57.818	Non
48 hpf	h4c3	35.609	304.192	57.818	Non
48 hpf	h4c3	35.609	272.489	57.818	Non
48 hpf	h4c3	35.609	247.161	57.818	Non
48 hpf	h4c3	35.609	231.09	57.818	Non
48 hpf	h4c4	36.797	284.098	59.75	Non
48 hpf	h4c4	36.797	282.051	59.75	Non
48 hpf	h4c4	36.797	265.398	59.75	Non
48 hpf	h4c4	43.389	276.736	70.468	Non
48 hpf	h4c4	43.389	261.276	70.468	Non
48 hpf	h4c4	43.389	245.01	70.468	Non
48 hpf	h4c4	41.498	317.704	67.383	Non
48 hpf	h4c4	41.498	312.206	67.383	Non
48 hpf	h4c4	41.498	295.257	67.383	Non
48 hpf	h4c4	41.498	266.573	67.383	Non
48 hpf	h4c4	41.498	240.068	67.383	Non
48 hpf	h4c4	41.498	215.097	67.383	Non
48 hpf	h4c4	41.498	202.557	67.383	Non
48 hpf	h5c1	50.198	316.152	81.525	Non
48 hpf	h5c1	50.198	342.139	81.525	Non
48 hpf	h5c1	50.198	333.974	81.525	Non
48 hpf	h5c1	51.819	336.821	84.191	Non
48 hpf	h5c1	51.819	291.329	84.191	Non
48 hpf	h5c1	51.819	251.055	84.191	Non
48 hpf	h5c1	51.819	226.195	84.191	Non
48 hpf	h5c1	51.819	208.079	84.191	Non
48 hpf	h5c2	41.498	383.379	67.405	Non
48 hpf	h5c2	41.498	405.853	67.405	Non
48 hpf	h5c2	41.498	411.598	67.405	Non
48 hpf	h5c2	41.498	364.409	67.405	Non
48 hpf	h5c2	41.498	290.72	67.405	Non
48 hpf	h5c2	41.498	235.607	67.405	Non
48 hpf	h5c2	41.498	197.098	67.405	Non
48 hpf	h5c2	41.498	159.163	67.405	Non
48 hpf	h5c3	34.42	370.895	55.884	Non
48 hpf	h5c3	34.42	394.673	55.884	Non
48 hpf	h5c3	34.42	381.395	55.884	Non
48 hpf	h5c3	39.715	398.207	64.486	Non
48 hpf	h5c3	39.715	377.515	64.486	Non
48 hpf	h5c3	39.715	339.938	64.486	Non
48 hpf	h5c3	39.715	300.977	64.486	Non
48 hpf	h5c3	39.715	250.815	64.486	Non
48 hpf	h5c3	39.715	199.072	64.486	Non
48 hpf	h5c4	30.799	368.659	50.003	Non
48 hpf	h5c4	30.799	368.488	50.003	Non
48 hpf	h5c4	30.799	351.445	50.003	Non
48 hpf	h5c4	30.799	311.967	50.003	Non
48 hpf	h5c4	31.88	284.15	51.752	Non
48 hpf	h5c4	31.88	245.903	51.752	Non
48 hpf	h5c4	31.88	204	51.752	Non
48 hpf	h5c4	31.88	167.933	51.752	Non
48 hpf	h5c4	31.88	146.62	51.752	Non
48 hpf	h5c4	31.88	127.378	51.752	Non
48 hpf	h6c1	48.144	357.146	78.199	Non
48 hpf	h6c1	48.144	394.139	78.199	Non
48 hpf	h6c1	48.144	404.056	78.199	Non
48 hpf	h6c1	48.144	391.33	78.199	Non
48 hpf	h6c1	48.144	344.877	78.199	Non
48 hpf	h6c1	48.144	298.856	78.199	Non
48 hpf	h6c1	51.765	318.115	84.081	Non
48 hpf	h6c1	51.765	296.949	84.081	Non
48 hpf	h6c1	51.765	281.452	84.081	Non
48 hpf	h6c1	51.765	258.389	84.081	Non
48 hpf	h6c1	51.765	231.908	84.081	Non
48 hpf	h6c2	43.93	295.877	71.357	Non
48 hpf	h6c2	43.93	291.037	71.357	Non
48 hpf	h6c2	43.93	272.046	71.357	Non
48 hpf	h6c2	49.495	364.7	80.402	Non
48 hpf	h6c2	49.495	299.022	80.402	Non
48 hpf	h6c2	49.495	241.82	80.402	Non
48 hpf	h6c2	49.495	192.027	80.402	Non
48 hpf	h6c2	49.495	155.673	80.402	Non
48 hpf	h6c2	49.495	124.915	80.402	Non
48 hpf	h6c3	40.958	358.193	66.508	Non
48 hpf	h6c3	40.958	358.257	66.508	Non
48 hpf	h6c3	40.958	341.892	66.508	Non
48 hpf	h6c3	40.958	321.64	66.508	Non
48 hpf	h6c3	40.958	294.039	66.508	Non
48 hpf	h6c3	40.958	274.628	66.508	Non
48 hpf	h6c4	49.387	350.403	80.223	Non
48 hpf	h6c4	49.387	364.209	80.223	Non
48 hpf	h6c4	49.387	344.424	80.223	Non
48 hpf	h6c4	49.387	315.815	80.223	Non
48 hpf	h6c4	49.387	283.454	80.223	Non
48 hpf	h6c4	49.387	258.837	80.223	Non
48 hpf	h6c4	49.387	238.921	80.223	Non
48 hpf	h6c4	49.387	217.811	80.223	Non
48 hpf	h6c4	49.387	202.528	80.223	Non
48 hpf	h7c1	41.822	306.023	67.911	Non
48 hpf	h7c1	41.822	347.811	67.911	Non
48 hpf	h7c1	41.822	345.708	67.911	Non
48 hpf	h7c1	41.822	308.594	67.911	Non
48 hpf	h7c1	41.822	255.729	67.911	Non
48 hpf	h7c1	41.822	211.564	67.911	Non
48 hpf	h7c1	41.822	184.223	67.911	Non
48 hpf	h7c2	37.554	332.844	60.981	Non
48 hpf	h7c2	37.554	355.477	60.981	Non
48 hpf	h7c2	37.554	337.84	60.981	Non
48 hpf	h7c2	38.04	323.792	61.772	Non
48 hpf	h7c2	38.04	281.261	61.772	Non
48 hpf	h7c2	38.04	239.853	61.772	Non
48 hpf	h7c2	38.04	218.576	61.772	Non
48 hpf	h7c2	38.04	202.054	61.772	Non
48 hpf	h7c2	38.04	181.875	61.772	Non
48 hpf	h7c3	40.742	317.76	66.156	Non
48 hpf	h7c3	40.742	352.125	66.156	Non
48 hpf	h7c3	40.742	361.329	66.156	Non
48 hpf	h7c3	40.742	324.649	66.156	Non
48 hpf	h7c3	40.742	274.589	66.156	Non
48 hpf	h7c3	42.795	259.464	69.519	Non
48 hpf	h7c3	42.795	218.337	69.519	Non
48 hpf	h7c3	42.795	191.348	69.519	Non
48 hpf	h7c3	42.795	178.935	69.519	Non
48 hpf	h7c3	42.795	167.594	69.519	Non
48 hpf	h7c4	38.688	314.542	62.83	Non
48 hpf	h7c4	38.688	320.557	62.83	Non
48 hpf	h7c4	38.688	291.376	62.83	Non
48 hpf	h7c4	40.255	282.134	65.375	Non
48 hpf	h7c4	40.255	220.484	65.375	Non
48 hpf	h7c4	40.255	164.236	65.375	Non
48 hpf	h8c1	43.443	553.832	70.563	Non
48 hpf	h8c1	43.443	578.346	70.563	Non
48 hpf	h8c1	43.443	566.997	70.563	Non
48 hpf	h8c1	43.443	500.422	70.563	Non
48 hpf	h8c1	43.443	379.96	70.563	Non
48 hpf	h8c1	43.443	264.194	70.563	Non
48 hpf	h8c1	43.443	197.787	70.563	Non
48 hpf	h8c1	43.443	170.807	70.563	Non
48 hpf	h8c2	34.258	517.36	55.623	Non
48 hpf	h8c2	34.258	532.208	55.623	Non
48 hpf	h8c2	34.258	523.104	55.623	Non
48 hpf	h8c2	35.446	513.777	57.567	Non
48 hpf	h8c2	35.446	437.996	57.567	Non
48 hpf	h8c2	35.446	359.558	57.567	Non
48 hpf	h8c2	35.446	301.965	57.567	Non
48 hpf	h8c2	35.446	251.607	57.567	Non
48 hpf	h8c3	43.227	391.937	70.208	Non
48 hpf	h8c3	43.227	390.013	70.208	Non
48 hpf	h8c3	43.227	352.263	70.208	Non
48 hpf	h8c3	43.227	312.023	70.208	Non
48 hpf	h8c3	43.227	258.411	70.208	Non
48 hpf	h8c3	43.227	217.635	70.208	Non
48 hpf	h8c3	43.227	199.965	70.208	Non
48 hpf	h8c4	46.902	388.503	76.186	Non
48 hpf	h8c4	46.902	397.574	76.186	Non
48 hpf	h8c4	46.902	385.653	76.186	Non
48 hpf	h8c4	48.036	390.602	78.031	Non
48 hpf	h8c4	48.036	346.774	78.031	Non
48 hpf	h8c4	48.036	289.836	78.031	Non
48 hpf	h8c4	48.036	252.436	78.031	Non
48 hpf	h8c4	48.036	207.825	78.031	Non
48 hpf	h8c4	48.036	169.725	78.031	Non
72 hpf	h1c1	34.582	627.141	56.14	Non
72 hpf	h1c1	34.582	652.174	56.14	Non
72 hpf	h1c1	34.582	637.076	56.14	Non
72 hpf	h1c1	34.582	579.921	56.14	Non
72 hpf	h1c1	35.23	606.725	57.201	Non
72 hpf	h1c1	35.23	493.458	57.201	Non
72 hpf	h1c1	35.23	407.619	57.201	Non
72 hpf	h1c1	35.23	347.723	57.201	Non
72 hpf	h1c1	35.23	241.244	57.201	Non
72 hpf	h1c2	30.259	494.414	49.121	Non
72 hpf	h1c2	30.259	564.655	49.121	Non
72 hpf	h1c2	30.259	581.48	49.121	Non
72 hpf	h1c2	30.259	582.051	49.121	Non
72 hpf	h1c2	33.609	585.309	54.56	Non
72 hpf	h1c2	33.501	472.482	54.388	Non
72 hpf	h1c2	33.501	418.316	54.388	Non
72 hpf	h1c2	33.447	323.87	54.306	Non
72 hpf	h1c2	33.447	256.278	54.306	Non
72 hpf	h1c2	33.447	226.38	54.306	Non
72 hpf	h1c3	35.771	451.617	58.089	Non
72 hpf	h1c3	35.771	477.611	58.089	Non
72 hpf	h1c3	35.771	487.114	58.089	Non
72 hpf	h1c3	37.554	481.519	60.987	Non
72 hpf	h1c3	37.554	466.438	60.987	Non
72 hpf	h1c3	35.609	491.385	57.815	Non
72 hpf	h1c3	35.609	456.111	57.815	Non
72 hpf	h1c3	35.609	421.891	57.815	Non
72 hpf	h1c3	35.609	392.809	57.815	Non
72 hpf	h1c3	35.609	341.533	57.815	Non
72 hpf	h1c3	35.609	276.196	57.815	Non
72 hpf	h1c3	35.609	217.867	57.815	Non
72 hpf	h1c4	30.799	406.594	49.996	Non
72 hpf	h1c4	30.799	428.143	49.996	Non
72 hpf	h1c4	30.799	425.667	49.996	Non
72 hpf	h1c4	34.474	433.116	55.971	Non
72 hpf	h1c4	34.474	464.189	55.971	Non
72 hpf	h1c4	34.474	469.192	55.971	Non
72 hpf	h1c4	34.474	464.548	55.971	Non
72 hpf	h1c4	34.474	457.257	55.971	Non
72 hpf	h1c4	34.474	436.898	55.971	Non
72 hpf	h1c4	34.636	396.083	56.234	Non
72 hpf	h1c4	34.636	343.878	56.234	Non
72 hpf	h1c4	34.636	286.859	56.234	Non
72 hpf	h1c4	34.636	217.165	56.234	Non
72 hpf	h1c4	34.636	158.085	56.234	Non
72 hpf	h1c5	32.745	364.933	53.165	Non
72 hpf	h1c5	32.745	367.843	53.165	Non
72 hpf	h1c5	32.745	362.705	53.165	Non
72 hpf	h1c5	32.637	388.575	52.98	Non
72 hpf	h1c5	34.204	431.61	55.53	Non
72 hpf	h1c5	34.204	435.738	55.53	Non
72 hpf	h1c5	34.204	420.655	55.53	Non
72 hpf	h1c5	34.204	398.527	55.53	Non
72 hpf	h1c5	34.204	374.925	55.53	Non
72 hpf	h1c5	34.204	352.34	55.53	Non
72 hpf	h1c5	34.204	304.153	55.53	Non
72 hpf	h1c5	34.204	242.655	55.53	Non
72 hpf	h1c5	34.204	191.307	55.53	Non
72 hpf	h1c5	34.204	158.278	55.53	Non
72 hpf	h1c6	40.958	429.502	66.52	Non
72 hpf	h1c6	40.958	448.034	66.52	Non
72 hpf	h1c6	40.958	449.734	66.52	Non
72 hpf	h1c6	39.067	484.566	63.436	Non
72 hpf	h1c6	39.067	468.083	63.436	Non
72 hpf	h1c6	39.067	445.254	63.436	Non
72 hpf	h1c6	39.067	395.086	63.436	Non
72 hpf	h1c6	39.067	315.073	63.436	Non
72 hpf	h1c6	39.067	241.32	63.436	Non
72 hpf	h1c6	39.067	186.197	63.436	Non
72 hpf	h1c6	39.067	143.103	63.436	Non
72 hpf	h2c1	33.231	334.988	53.952	Non
72 hpf	h2c1	33.231	342.021	53.952	Non
72 hpf	h2c1	33.231	332.609	53.952	Non
72 hpf	h2c1	35.446	457.051	57.551	Non
72 hpf	h2c1	35.446	428.684	57.551	Non
72 hpf	h2c1	35.446	356.664	57.551	Non
72 hpf	h2c1	35.446	241.958	57.551	Non
72 hpf	h2c1	35.446	154.541	57.551	Non
72 hpf	h2c2	34.204	374.701	55.535	Non
72 hpf	h2c2	34.204	394.824	55.535	Non
72 hpf	h2c2	37.608	452.837	61.057	Non
72 hpf	h2c2	37.608	431.024	61.057	Non
72 hpf	h2c2	37.608	379.04	61.057	Non
72 hpf	h2c2	37.608	285.034	61.057	Non
72 hpf	h2c2	37.608	185.019	61.057	Non
72 hpf	h2c3	34.798	415.658	56.496	Non
72 hpf	h2c3	34.798	429.176	56.496	Non
72 hpf	h2c3	34.798	421.169	56.496	Non
72 hpf	h2c3	37.878	461.884	61.495	Non
72 hpf	h2c3	37.878	408.92	61.495	Non
72 hpf	h2c3	37.878	293.922	61.495	Non
72 hpf	h2c3	37.878	200.609	61.495	Non
72 hpf	h2c3	37.878	146.862	61.495	Non
72 hpf	h2c3	37.878	111.031	61.495	Non
72 hpf	h2c4	36.473	353.848	59.233	Non
72 hpf	h2c4	36.473	358.474	59.233	Non
72 hpf	h2c4	36.473	311.766	59.233	Non
72 hpf	h2c4	36.473	252.903	59.233	Non
72 hpf	h2c4	37.067	284.6	60.186	Non
72 hpf	h2c4	37.067	246.658	60.186	Non
72 hpf	h2c4	37.067	191.196	60.186	Non
72 hpf	h2c4	37.067	140.927	60.186	Non
72 hpf	h3c1	38.418	699.965	62.378	Non
72 hpf	h3c1	38.094	739.518	61.872	Non
72 hpf	h3c1	38.094	757.731	61.872	Non
72 hpf	h3c1	37.446	802.83	60.806	Non
72 hpf	h3c1	37.446	768.085	60.806	Non
72 hpf	h3c1	37.446	647.148	60.806	Non
72 hpf	h3c1	37.446	504.85	60.806	Non
72 hpf	h3c1	37.446	373.677	60.806	Non
72 hpf	h3c1	37.446	278.22	60.806	Non
72 hpf	h3c2	33.123	1024.432	53.769	Non
72 hpf	h3c2	33.123	1067.437	53.769	Non
72 hpf	h3c2	33.123	1064.92	53.769	Non
72 hpf	h3c2	36.635	1001.531	59.484	Non
72 hpf	h3c2	36.635	859.494	59.484	Non
72 hpf	h3c2	36.581	787.991	59.396	Non
72 hpf	h3c2	36.581	621.637	59.396	Non
72 hpf	h3c2	36.581	458.964	59.396	Non
72 hpf	h3c2	36.581	332.842	59.396	Non
72 hpf	h3c2	36.581	239.135	59.396	Non
72 hpf	h3c3	34.744	784.878	56.406	Non
72 hpf	h3c3	34.744	830.761	56.406	Non
72 hpf	h3c3	34.744	849.196	56.406	Non
72 hpf	h3c3	34.204	893.636	55.539	Non
72 hpf	h3c3	34.204	777.76	55.539	Non
72 hpf	h3c3	34.204	622.683	55.539	Non
72 hpf	h3c3	35.609	607.29	57.815	Non
72 hpf	h3c3	35.609	525.165	57.815	Non
72 hpf	h3c3	35.609	445.621	57.815	Non
72 hpf	h3c3	35.609	351.605	57.815	Non
72 hpf	h3c3	35.609	302.297	57.815	Non
72 hpf	h3c4	34.798	993.768	56.498	Non
72 hpf	h3c4	34.798	1021.47	56.498	Non
72 hpf	h3c4	34.798	1010.487	56.498	Non
72 hpf	h3c4	34.798	937.617	56.498	Non
72 hpf	h3c4	34.798	809.173	56.498	Non
72 hpf	h3c4	34.798	661.26	56.498	Non
72 hpf	h3c4	34.798	593.41	56.498	Non
72 hpf	h3c4	34.798	514.975	56.498	Non
72 hpf	h3c4	34.798	423.707	56.498	Non
72 hpf	h3c4	34.798	317.342	56.498	Non
72 hpf	h3c4	34.798	264.359	56.498	Non
72 hpf	h3c5	37.932	783.246	61.604	Non
72 hpf	h3c5	37.932	816.423	61.604	Non
72 hpf	h3c5	41.822	871.865	67.909	Non
72 hpf	h3c5	41.822	840.38	67.909	Non
72 hpf	h3c5	41.282	773.463	67.04	Non
72 hpf	h3c5	41.282	684.594	67.04	Non
72 hpf	h3c5	41.282	596.636	67.04	Non
72 hpf	h3c5	41.282	462.293	67.04	Non
72 hpf	h3c5	41.282	337.466	67.04	Non
72 hpf	h3c5	41.282	276.515	67.04	Non
72 hpf	h3c5	41.282	237.865	67.04	Non
72 hpf	h3c5	41.282	207.303	67.04	Non
72 hpf	h3c6	26.585	799.466	43.141	Non
72 hpf	h3c6	26.585	853.633	43.141	Non
72 hpf	h3c6	26.585	865.59	43.141	Non
72 hpf	h3c6	26.585	823.223	43.141	Non
72 hpf	h3c6	26.585	708.338	43.141	Non
72 hpf	h3c6	27.395	762.258	44.463	Non
72 hpf	h3c6	27.395	623.918	44.463	Non
72 hpf	h3c6	27.395	483.188	44.463	Non
72 hpf	h3c6	27.395	394.849	44.463	Non
72 hpf	h3c6	27.395	294.22	44.463	Non
72 hpf	h3c6	27.395	217.488	44.463	Non
72 hpf	h3c6	27.395	185.056	44.463	Non
72 hpf	h4c1	29.665	553.572	48.152	Non
72 hpf	h4c1	29.665	600.273	48.152	Non
72 hpf	h4c1	29.665	607.938	48.152	Non
72 hpf	h4c1	29.665	591.476	48.152	Non
72 hpf	h4c1	29.665	564.516	48.152	Non
72 hpf	h4c1	29.665	521.849	48.152	Non
72 hpf	h4c1	29.665	470.356	48.152	Non
72 hpf	h4c1	29.665	406.75	48.152	Non
72 hpf	h4c2	30.908	584.29	50.169	Non
72 hpf	h4c2	30.908	590.985	50.169	Non
72 hpf	h4c2	34.852	637.696	56.581	Non
72 hpf	h4c2	34.852	622.448	56.581	Non
72 hpf	h4c2	34.852	566.967	56.581	Non
72 hpf	h4c2	33.825	533.721	54.913	Non
72 hpf	h4c2	33.825	503.314	54.913	Non
72 hpf	h4c2	33.825	467.875	54.913	Non
72 hpf	h4c2	33.825	419.086	54.913	Non
72 hpf	h4c2	33.825	323.1	54.913	Non
72 hpf	h4c2	33.825	263.859	54.913	Non
72 hpf	h4c3	36.959	546.422	60.016	Non
72 hpf	h4c3	36.959	546.89	60.016	Non
72 hpf	h4c3	36.959	513.521	60.016	Non
72 hpf	h4c3	37.338	485.679	60.626	Non
72 hpf	h4c3	37.338	447.774	60.626	Non
72 hpf	h4c3	37.338	406.582	60.626	Non
72 hpf	h4c3	37.338	362.226	60.626	Non
72 hpf	h4c3	37.338	279.218	60.626	Non
72 hpf	h4c3	37.338	226.934	60.626	Non
72 hpf	h4c3	37.338	190.457	60.626	Non
72 hpf	h4c4	39.769	639.663	64.59	Non
72 hpf	h4c4	39.769	675.103	64.59	Non
72 hpf	h4c4	39.769	663.23	64.59	Non
72 hpf	h4c4	39.769	597.992	64.59	Non
72 hpf	h4c4	41.444	493.366	67.309	Non
72 hpf	h4c4	41.444	432.941	67.309	Non
72 hpf	h4c4	41.444	359.585	67.309	Non
72 hpf	h4c4	41.444	307.934	67.309	Non
72 hpf	h4c4	41.444	258.543	67.309	Non
72 hpf	h4c4	41.444	203.672	67.309	Non
72 hpf	h4c4	41.444	166.044	67.309	Non
72 hpf	h4c4	41.444	145.157	67.309	Non
72 hpf	h4c4	41.444	125.322	67.309	Non
72 hpf	h5c1	29.124	978.547	47.268	Non
72 hpf	h5c1	29.124	1081.761	47.268	Non
72 hpf	h5c1	32.366	1250.258	52.553	Non
72 hpf	h5c1	32.366	1294.927	52.553	Non
72 hpf	h5c1	32.366	1295.697	52.553	Non
72 hpf	h5c1	32.366	1262.302	52.553	Non
72 hpf	h5c1	32.366	1185.099	52.553	Non
72 hpf	h5c1	32.366	1019.545	52.553	Non
72 hpf	h5c1	32.366	920.716	52.553	Non
72 hpf	h5c1	32.366	764.641	52.553	Non
72 hpf	h5c1	32.366	583.074	52.553	Non
72 hpf	h5c1	32.366	411.317	52.553	Non
72 hpf	h5c1	32.366	299.335	52.553	Non
72 hpf	h5c2	32.312	1170.058	52.456	Non
72 hpf	h5c2	32.312	1254.759	52.456	Non
72 hpf	h5c2	32.583	1530.12	52.894	Non
72 hpf	h5c2	32.583	1537.679	52.894	Non
72 hpf	h5c2	32.583	1502.843	52.894	Non
72 hpf	h5c2	32.583	1461.696	52.894	Non
72 hpf	h5c2	32.204	1463.895	52.277	Non
72 hpf	h5c2	32.204	1258.457	52.277	Non
72 hpf	h5c2	32.204	1095.388	52.277	Non
72 hpf	h5c2	32.204	891.75	52.277	Non
72 hpf	h5c2	32.204	634.521	52.277	Non
72 hpf	h5c2	32.204	432.696	52.277	Non
72 hpf	h5c2	32.204	304.535	52.277	Non
72 hpf	h5c3	22.316	874.213	36.207	Non
72 hpf	h5c3	22.316	902.466	36.207	Non
72 hpf	h5c3	22.316	899.777	36.207	Non
72 hpf	h5c3	22.316	832.183	36.207	Non
72 hpf	h5c3	25.396	956.392	41.21	Non
72 hpf	h5c3	25.396	977.721	41.21	Non
72 hpf	h5c3	25.396	982.94	41.21	Non
72 hpf	h5c3	25.396	932.237	41.21	Non
72 hpf	h5c3	27.341	915.936	44.371	Non
72 hpf	h5c3	27.341	915.611	44.371	Non
72 hpf	h5c3	27.341	880.878	44.371	Non
72 hpf	h5c3	27.341	730.416	44.371	Non
72 hpf	h5c3	27.341	617.338	44.371	Non
72 hpf	h5c3	27.341	526.998	44.371	Non
72 hpf	h5c3	26.801	644.087	43.481	Non
72 hpf	h5c3	26.801	587.361	43.481	Non
72 hpf	h5c3	26.801	515.634	43.481	Non
72 hpf	h5c3	26.801	421.51	43.481	Non
72 hpf	h5c3	26.801	348.532	43.481	Non
72 hpf	h5c4	37.176	802.495	60.354	Non
72 hpf	h5c4	37.176	846.956	60.354	Non
72 hpf	h5c4	37.176	855.945	60.354	Non
72 hpf	h5c4	37.176	879.621	60.354	Non
72 hpf	h5c4	37.176	912.588	60.354	Non
72 hpf	h5c4	36.257	995.947	58.881	Non
72 hpf	h5c4	36.257	1016.313	58.881	Non
72 hpf	h5c4	36.257	988.56	58.881	Non
72 hpf	h5c4	36.257	937.409	58.881	Non
72 hpf	h5c4	36.257	843.748	58.881	Non
72 hpf	h5c4	37.013	739.495	60.092	Non
72 hpf	h5c4	37.013	625.296	60.092	Non
72 hpf	h5c4	37.013	519.216	60.092	Non
72 hpf	h5c4	37.013	489.441	60.092	Non
72 hpf	h5c4	37.013	402.721	60.092	Non
72 hpf	h5c4	37.013	337.536	60.092	Non
72 hpf	h5c4	37.013	271.073	60.092	Non
72 hpf	h5c5	42.795	883.593	69.496	Non
72 hpf	h5c5	42.795	917.038	69.496	Non
72 hpf	h5c5	42.795	881.359	69.496	Non
72 hpf	h5c5	42.795	859.637	69.496	Non
72 hpf	h5c5	41.606	948.195	67.571	Non
72 hpf	h5c5	41.606	875.194	67.571	Non
72 hpf	h5c5	41.606	759.486	67.571	Non
72 hpf	h5c5	42.957	735.464	69.753	Non
72 hpf	h5c5	42.957	636.227	69.753	Non
72 hpf	h5c5	42.957	527.764	69.753	Non
72 hpf	h5c5	42.957	393.903	69.753	Non
72 hpf	h5c5	42.957	319.026	69.753	Non
72 hpf	h5c5	42.957	272.62	69.753	Non
72 hpf	h5c5	42.957	255.491	69.753	Non
72 hpf	h5c5	42.957	226.273	69.753	Non
72 hpf	h5c6	31.124	773.402	50.52	Non
72 hpf	h5c6	31.124	809.165	50.52	Non
72 hpf	h5c6	31.124	782.792	50.52	Non
72 hpf	h5c6	29.178	748.056	47.364	Non
72 hpf	h5c6	29.178	691.654	47.364	Non
72 hpf	h5c6	32.312	827.573	52.457	Non
72 hpf	h5c6	32.312	827.573	52.457	Non
72 hpf	h5c6	32.312	672.76	52.457	Non
72 hpf	h5c6	32.312	607.85	52.457	Non
72 hpf	h5c6	32.312	498.114	52.457	Non
72 hpf	h5c6	32.312	406.44	52.457	Non
72 hpf	h5c6	32.312	316.5	52.457	Non
72 hpf	h5c6	32.312	230.989	52.457	Non
72 hpf	h5c6	32.312	183.244	52.457	Non
72 hpf	h5c6	32.312	149.435	52.457	Non
72 hpf	h5c6	32.312	120.171	52.457	Non
72 hpf	h6c1	33.988	543.945	55.185	Non
72 hpf	h6c1	40.526	584.028	65.799	Non
72 hpf	h6c1	39.985	626.486	64.927	Non
72 hpf	h6c1	39.985	602.309	64.927	Non
72 hpf	h6c1	42.093	674.854	68.355	Non
72 hpf	h6c1	42.093	675.435	68.355	Non
72 hpf	h6c1	42.093	598.874	68.355	Non
72 hpf	h6c1	40.418	607.925	65.635	Non
72 hpf	h6c1	40.418	552.05	65.635	Non
72 hpf	h6c1	40.418	501.359	65.635	Non
72 hpf	h6c1	40.418	434.823	65.635	Non
72 hpf	h6c2	31.664	542.23	51.398	Non
72 hpf	h6c2	31.664	574.533	51.398	Non
72 hpf	h6c2	34.096	741.777	55.353	Non
72 hpf	h6c2	34.096	744.983	55.353	Non
72 hpf	h6c2	34.096	715.827	55.353	Non
72 hpf	h6c2	34.042	644.533	55.261	Non
72 hpf	h6c2	34.042	504.998	55.261	Non
72 hpf	h6c2	34.042	390.545	55.261	Non
72 hpf	h6c2	34.042	314.36	55.261	Non
72 hpf	h6c2	34.042	272.112	55.261	Non
72 hpf	h6c2	34.042	216.348	55.261	Non
72 hpf	h6c3	33.555	495.625	54.473	Non
72 hpf	h6c3	33.555	512.854	54.473	Non
72 hpf	h6c3	33.555	511.411	54.473	Non
72 hpf	h6c3	33.825	564.738	54.914	Non
72 hpf	h6c3	33.825	504.543	54.914	Non
72 hpf	h6c3	33.825	395.068	54.914	Non
72 hpf	h6c3	33.825	297.781	54.914	Non
72 hpf	h6c3	33.825	235.09	54.914	Non
72 hpf	h6c3	33.825	200.588	54.914	Non
72 hpf	h7c1	29.233	337.535	47.445	Non
72 hpf	h7c1	29.233	343.344	47.445	Non
72 hpf	h7c1	29.233	340.865	47.445	Non
72 hpf	h7c1	32.583	348.573	52.897	Non
72 hpf	h7c1	32.583	354.583	52.897	Non
72 hpf	h7c1	32.583	345.824	52.897	Non
72 hpf	h7c1	32.583	315.624	52.897	Non
72 hpf	h7c1	32.583	283.155	52.897	Non
72 hpf	h7c1	32.583	248.4	52.897	Non
72 hpf	h7c1	32.583	225.747	52.897	Non
72 hpf	h7c1	34.366	233.783	55.797	Non
72 hpf	h7c1	34.366	201.104	55.797	Non
72 hpf	h7c1	34.366	178.749	55.797	Non
72 hpf	h7c2	38.418	280.466	62.379	Non
72 hpf	h7c2	38.418	298.196	62.379	Non
72 hpf	h7c2	38.418	305.443	62.379	Non
72 hpf	h7c2	38.418	306.582	62.379	Non
72 hpf	h7c2	38.418	298.135	62.379	Non
72 hpf	h7c2	41.228	271.319	66.942	Non
72 hpf	h7c2	41.228	281.108	66.942	Non
72 hpf	h7c2	41.228	286.5	66.942	Non
72 hpf	h7c2	41.336	288.626	67.137	Non
72 hpf	h7c2	41.336	289.023	67.137	Non
72 hpf	h7c2	41.336	277.616	67.137	Non
72 hpf	h7c2	41.336	254.865	67.137	Non
72 hpf	h7c2	41.336	223.81	67.137	Non
72 hpf	h7c2	41.336	200.266	67.137	Non
72 hpf	h7c2	41.336	160.981	67.137	Non
72 hpf	h7c3	38.148	305.611	61.942	Non
72 hpf	h7c3	38.148	323.639	61.942	Non
72 hpf	h7c3	37.77	364.418	61.338	Non
72 hpf	h7c3	37.77	371.516	61.338	Non
72 hpf	h7c3	37.77	358.44	61.338	Non
72 hpf	h7c3	37.77	343.156	61.338	Non
72 hpf	h7c3	37.77	310.523	61.338	Non
72 hpf	h7c3	37.77	269.891	61.338	Non
72 hpf	h7c3	37.77	227.754	61.338	Non
72 hpf	h7c3	37.77	203.377	61.338	Non
72 hpf	h7c3	37.77	167.793	61.338	Non
72 hpf	h7c3	37.77	145.795	61.338	Non
72 hpf	h7c3	37.77	131.695	61.338	Non
72 hpf	h7c3	37.77	120.48	61.338	Non
72 hpf	h7c4	40.093	334.154	65.108	Non
72 hpf	h7c4	40.093	339.314	65.108	Non
72 hpf	h7c4	40.093	344.238	65.108	Non
72 hpf	h7c4	40.093	343.296	65.108	Non
72 hpf	h7c4	40.093	328.33	65.108	Non
72 hpf	h7c4	40.634	372.094	65.984	Non
72 hpf	h7c4	40.634	358.733	65.984	Non
72 hpf	h7c4	40.634	345.505	65.984	Non
72 hpf	h7c4	40.634	320.956	65.984	Non
72 hpf	h7c4	40.634	287.089	65.984	Non
72 hpf	h7c4	40.634	250.383	65.984	Non
72 hpf	h7c4	40.634	225.973	65.984	Non
72 hpf	h7c4	40.634	190.172	65.984	Non
72 hpf	h7c4	40.634	161.195	65.984	Non
72 hpf	h7c4	40.634	137.774	65.984	Non
72 hpf	h7c5	35.392	267.132	57.471	Non
72 hpf	h7c5	34.366	342.607	55.789	Non
72 hpf	h7c5	33.663	332.135	54.651	Non
72 hpf	h7c5	33.663	336.728	54.651	Non
72 hpf	h7c5	33.663	336.923	54.651	Non
72 hpf	h7c5	33.663	322.713	54.651	Non
72 hpf	h7c5	33.663	302.5	54.651	Non
72 hpf	h7c5	33.663	281.607	54.651	Non
72 hpf	h7c5	33.663	264.645	54.651	Non
72 hpf	h7c5	33.663	240.16	54.651	Non
72 hpf	h7c5	33.663	209.68	54.651	Non
72 hpf	h7c5	33.663	186.276	54.651	Non
72 hpf	h7c5	33.663	164.716	54.651	Non
72 hpf	h7c5	33.663	142.899	54.651	Non
72 hpf	h7c5	33.663	130.092	54.651	Non
72 hpf	h7c5	33.663	120.033	54.651	Non
72 hpf	h8c1	42.903	256.679	69.688	Non
72 hpf	h8c1	42.903	285.72	69.688	Non
72 hpf	h8c1	41.552	303.6	67.476	Non
72 hpf	h8c1	41.552	271.761	67.476	Non
72 hpf	h8c1	41.552	215.477	67.476	Non
72 hpf	h8c1	42.255	205.578	68.612	Non
72 hpf	h8c1	42.255	148.307	68.612	Non
72 hpf	h8c1	42.255	125.289	68.612	Non
72 hpf	h8c1	42.255	99.776	68.612	Non
72 hpf	h8c2	37.446	256.929	60.799	Non
72 hpf	h8c2	37.446	263.341	60.799	Non
72 hpf	h8c2	37.446	262.19	60.799	Non
72 hpf	h8c2	38.797	269.82	62.998	Non
72 hpf	h8c2	38.797	256.645	62.998	Non
72 hpf	h8c2	38.797	233.292	62.998	Non
72 hpf	h8c2	38.797	197.05	62.998	Non
72 hpf	h8c2	38.797	165.256	62.998	Non
72 hpf	h8c2	38.797	142.373	62.998	Non
72 hpf	h8c3	39.229	367.499	63.708	Non
72 hpf	h8c3	39.229	364.407	63.708	Non
72 hpf	h8c3	39.229	341.883	63.708	Non
72 hpf	h8c3	42.255	347.804	68.626	Non
72 hpf	h8c3	42.255	344.014	68.626	Non
72 hpf	h8c3	42.255	323.931	68.626	Non
72 hpf	h8c3	42.255	280.374	68.626	Non
72 hpf	h8c3	43.011	274.344	69.857	Non
72 hpf	h8c3	43.011	231.285	69.857	Non
72 hpf	h8c3	43.011	204.619	69.857	Non
72 hpf	h8c3	43.011	171.868	69.857	Non
72 hpf	h8c3	43.011	140.725	69.857	Non
72 hpf	h8c3	43.011	116.84	69.857	Non
72 hpf	h8c4	42.039	293.522	68.286	Non
72 hpf	h8c4	42.039	317.23	68.286	Non
72 hpf	h8c4	42.039	330.842	68.286	Non
72 hpf	h8c4	42.039	333.519	68.286	Non
72 hpf	h8c4	40.31	362.512	65.455	Non
72 hpf	h8c4	40.31	347.052	65.455	Non
72 hpf	h8c4	40.31	298.111	65.455	Non
72 hpf	h8c4	40.31	254.399	65.455	Non
72 hpf	h8c4	40.31	177.6	65.455	Non
72 hpf	h8c4	40.31	138.803	65.455	Non
72 hpf	h8c4	40.31	105.74	65.455	Non
72 hpf	h8c4	40.31	88.04	65.455	Non
24 hpf	h11c1	75.108	220.592	122.046	Non
24 hpf	h11c1	75.108	208.261	122.046	Non
24 hpf	h11c1	75.108	186.715	122.046	Non
24 hpf	h11c1	75.108	168.828	122.046	Non
24 hpf	h11c1	75.108	150.403	122.046	Non
24 hpf	h11c1	75.108	131.858	122.046	Non
24 hpf	h11c1	75.108	118.313	122.046	Non
24 hpf	h11c2	51.549	224.421	83.735	Non
24 hpf	h11c2	51.549	219.025	83.735	Non
24 hpf	h11c2	51.549	196.401	83.735	Non
24 hpf	h11c2	51.549	177.336	83.735	Non
24 hpf	h11c2	51.549	161.733	83.735	Non
24 hpf	h11c2	51.549	146.654	83.735	Non
24 hpf	h11c2	51.549	129.072	83.735	Non
24 hpf	h12c1	33.609	258.628	54.57	Non
24 hpf	h12c1	33.609	244.436	54.57	Non
24 hpf	h12c1	33.609	218.015	54.57	Non
24 hpf	h12c1	33.609	184.83	54.57	Non
24 hpf	h12c1	33.609	150.182	54.57	Non
24 hpf	h12c1	33.609	132.165	54.57	Non
24 hpf	h12c2	55.061	135.711	89.448	Non
24 hpf	h12c2	55.061	126.085	89.448	Non
24 hpf	h12c2	55.061	119.906	89.448	Non
24 hpf	h12c2	55.061	114.168	89.448	Non
24 hpf	h12c2	55.061	108.529	89.448	Non
24 hpf	h13c1	38.04	216.506	61.774	Non
24 hpf	h13c1	38.04	208.393	61.774	Non
24 hpf	h13c1	38.04	195.377	61.774	Non
24 hpf	h13c1	38.04	179.112	61.774	Non
24 hpf	h13c1	43.768	177.524	71.081	Non
24 hpf	h13c1	43.768	161.04	71.081	Non
24 hpf	h13c1	43.768	144.11	71.081	Non
24 hpf	h13c1	43.768	128.048	71.081	Non
24 hpf	h13c1	43.768	115.417	71.081	Non
24 hpf	h13c2	53.17	216.296	86.368	Non
24 hpf	h13c2	53.17	200.466	86.368	Non
24 hpf	h13c2	53.17	176.287	86.368	Non
24 hpf	h13c2	53.17	158.761	86.368	Non
24 hpf	h13c2	53.17	147.365	86.368	Non
24 hpf	h13c2	53.17	134.363	86.368	Non
24 hpf	h13c3	40.255	208.594	65.365	Non
24 hpf	h13c3	40.255	210.417	65.365	Non
24 hpf	h13c3	40.255	210.891	65.365	Non
24 hpf	h13c3	40.255	204.99	65.365	Non
24 hpf	h13c3	40.255	195.349	65.365	Non
24 hpf	h13c3	40.255	180.012	65.365	Non
24 hpf	h13c3	40.255	165.694	65.365	Non
24 hpf	h13c4	36.095	196.432	58.599	Non
24 hpf	h13c4	36.095	174.367	58.599	Non
24 hpf	h13c4	36.095	153.871	58.599	Non
24 hpf	h13c4	36.095	142.781	58.599	Non
24 hpf	h13c4	51.17	211.691	83.128	Non
24 hpf	h13c4	51.17	207.028	83.128	Non
24 hpf	h13c4	51.17	194.27	83.128	Non
24 hpf	h13c4	51.17	174.562	83.128	Non
24 hpf	h13c4	51.17	157.315	83.128	Non
24 hpf	h13c4	51.17	143.097	83.128	Non
24 hpf	h13c4	51.17	132.009	83.128	Non
24 hpf	h13c4	51.17	123.601	83.128	Non
24 hpf	h14c1	51.711	235.376	84.009	Non
24 hpf	h14c1	51.711	220.055	84.009	Non
24 hpf	h14c1	54.737	232.657	88.916	Non
24 hpf	h14c1	54.737	224.227	88.916	Non
24 hpf	h14c1	54.737	210.969	88.916	Non
24 hpf	h14c1	54.737	195.437	88.916	Non
24 hpf	h14c1	54.737	178.432	88.916	Non
24 hpf	h14c1	54.737	163.852	88.916	Non
24 hpf	h14c2	40.147	251.454	65.198	Non
24 hpf	h14c2	40.147	245.301	65.198	Non
24 hpf	h14c2	40.147	231.254	65.198	Non
24 hpf	h14c2	40.147	217.42	65.198	Non
24 hpf	h14c2	40.147	203.008	65.198	Non
24 hpf	h14c2	40.147	185.503	65.198	Non
24 hpf	h14c2	40.147	164.833	65.198	Non
24 hpf	h14c3	48.199	252.908	78.28	Non
24 hpf	h14c3	48.199	245.635	78.28	Non
24 hpf	h14c3	48.199	233.824	78.28	Non
24 hpf	h14c3	48.199	205.824	78.28	Non
24 hpf	h14c3	48.199	178.079	78.28	Non
24 hpf	h14c3	48.199	162.006	78.28	Non
24 hpf	h14c3	48.199	149.437	78.28	Non
24 hpf	h14c3	48.199	137.488	78.28	Non
24 hpf	h14c4	39.553	281.003	64.231	Non
24 hpf	h14c4	39.553	257	64.231	Non
24 hpf	h14c4	39.553	232.412	64.231	Non
24 hpf	h14c4	39.553	200.82	64.231	Non
24 hpf	h14c4	39.553	169.741	64.231	Non
24 hpf	h14c4	39.553	149.907	64.231	Non
24 hpf	h15c1	50.522	208.443	82.061	Non
24 hpf	h15c1	50.522	199.385	82.061	Non
24 hpf	h15c1	50.522	187.987	82.061	Non
24 hpf	h15c1	50.522	171.255	82.061	Non
24 hpf	h15c1	50.522	149.567	82.061	Non
24 hpf	h15c2	49.82	229.207	80.914	Non
24 hpf	h15c2	49.82	224.545	80.914	Non
24 hpf	h15c2	49.82	215.506	80.914	Non
24 hpf	h15c2	49.82	198.751	80.914	Non
24 hpf	h15c2	49.82	176.545	80.914	Non
24 hpf	h15c2	49.82	157.494	80.914	Non
24 hpf	h15c2	49.82	142.526	80.914	Non
24 hpf	h15c2	49.82	128.71	80.914	Non
24 hpf	h15c3	45.551	245.708	73.978	Non
24 hpf	h15c3	45.551	251.422	73.978	Non
24 hpf	h15c3	45.551	248.236	73.978	Non
24 hpf	h15c3	45.551	228.243	73.978	Non
24 hpf	h15c3	47.766	218.862	77.588	Non
24 hpf	h15c3	47.766	197.86	77.588	Non
24 hpf	h15c3	47.766	183.777	77.588	Non
24 hpf	h15c3	47.766	169.871	77.588	Non
24 hpf	h15c3	47.766	149.051	77.588	Non
24 hpf	h15c4	42.039	210.99	68.269	Non
24 hpf	h15c4	42.039	205.676	68.269	Non
24 hpf	h15c4	42.039	195.524	68.269	Non
24 hpf	h15c4	42.039	174.755	68.269	Non
24 hpf	h15c4	42.039	154.637	68.269	Non
24 hpf	h15c4	46.469	148.993	75.479	Non
24 hpf	h15c4	46.469	134.933	75.479	Non
24 hpf	h15c4	46.469	122.081	75.479	Non
24 hpf	h15c4	46.469	112.885	75.479	Non
24 hpf	h16c1	42.795	158.199	69.505	Non
24 hpf	h16c1	42.795	156.432	69.505	Non
24 hpf	h16c1	42.795	151.339	69.505	Non
24 hpf	h16c1	42.795	144.767	69.505	Non
24 hpf	h16c1	42.795	139.099	69.505	Non
24 hpf	h16c2	42.039	144.879	68.267	Non
24 hpf	h16c2	42.039	142.529	68.267	Non
24 hpf	h16c2	42.039	138.842	68.267	Non
24 hpf	h16c2	42.039	136.965	68.267	Non
24 hpf	h16c2	42.039	131.172	68.267	Non
24 hpf	h16c2	42.039	131.166	68.267	Non
24 hpf	h16c3	41.768	135.919	67.837	Non
24 hpf	h16c3	41.768	135.868	67.837	Non
24 hpf	h16c3	41.768	134.217	67.837	Non
24 hpf	h16c3	41.768	130.95	67.837	Non
24 hpf	h16c3	41.768	125.566	67.837	Non
24 hpf	h16c3	41.768	120.944	67.837	Non
24 hpf	h16c3	41.768	116.338	67.837	Non
24 hpf	h16c4	38.688	118.23	62.828	Non
24 hpf	h16c4	38.688	115.951	62.828	Non
24 hpf	h16c4	38.688	114.233	62.828	Non
24 hpf	h16c4	38.688	112.606	62.828	Non
24 hpf	h16c4	38.688	109.075	62.828	Non
24 hpf	h16c4	38.688	106.969	62.828	Non
24 hpf	h17c1	56.033	226.531	91.04	Non
24 hpf	h17c1	56.033	210.115	91.04	Non
24 hpf	h17c1	56.033	193.946	91.04	Non
24 hpf	h17c1	56.033	176.651	91.04	Non
24 hpf	h17c1	56.033	157.588	91.04	Non
24 hpf	h17c2	65.76	211.5	106.84	Non
24 hpf	h17c2	65.76	200.651	106.84	Non
24 hpf	h17c2	65.76	189.811	106.84	Non
24 hpf	h17c2	65.76	178.687	106.84	Non
24 hpf	h17c2	65.76	161.653	106.84	Non
24 hpf	h17c2	65.76	141.8	106.84	Non
24 hpf	h17c2	65.76	127.31	106.84	Non
24 hpf	h17c2	65.76	118.481	106.84	Non
24 hpf	h17c3	44.308	268.648	71.96	Non
24 hpf	h17c3	44.308	262.34	71.96	Non
24 hpf	h17c3	44.308	249.497	71.96	Non
24 hpf	h17c3	44.308	232.152	71.96	Non
24 hpf	h17c3	44.308	204.881	71.96	Non
24 hpf	h17c3	44.308	170.642	71.96	Non
24 hpf	h17c3	44.308	146.61	71.96	Non
24 hpf	h17c4	44.038	248.206	71.517	Non
24 hpf	h17c4	44.038	229.473	71.517	Non
24 hpf	h17c4	44.038	209.015	71.517	Non
24 hpf	h17c4	44.038	189.478	71.517	Non
24 hpf	h17c4	44.038	167.312	71.517	Non
24 hpf	h17c4	44.038	146.419	71.517	Non
24 hpf	h17c4	44.038	131.267	71.517	Non
24 hpf	h17c5	44.038	248.206	71.517	Non
24 hpf	h17c5	44.038	229.473	71.517	Non
24 hpf	h17c5	44.038	209.015	71.517	Non
24 hpf	h17c5	44.038	189.478	71.517	Non
24 hpf	h17c5	44.038	167.312	71.517	Non
24 hpf	h17c5	44.038	146.419	71.517	Non
24 hpf	h17c5	44.038	131.267	71.517	Non
24 hpf	h17c6	40.688	236.805	66.074	Non
24 hpf	h17c6	40.688	218.655	66.074	Non
24 hpf	h17c6	40.688	199.154	66.074	Non
24 hpf	h17c6	40.688	174.434	66.074	Non
24 hpf	h17c6	40.688	152.136	66.074	Non
24 hpf	h17c6	40.688	138.863	66.074	Non
24 hpf	h18c1	41.552	256.694	67.483	Non
24 hpf	h18c1	41.552	238.103	67.483	Non
24 hpf	h18c1	41.552	196.942	67.483	Non
24 hpf	h18c1	41.552	162.288	67.483	Non
24 hpf	h18c1	41.552	138.856	67.483	Non
24 hpf	h18c2	57.6	211.189	93.583	Non
24 hpf	h18c2	57.6	192.859	93.583	Non
24 hpf	h18c2	57.6	167.703	93.583	Non
24 hpf	h18c2	57.6	146.079	93.583	Non
24 hpf	h18c3	51.17	185.054	83.128	Non
24 hpf	h18c3	51.17	171.893	83.128	Non
24 hpf	h18c3	51.17	160.25	83.128	Non
24 hpf	h18c3	51.17	147.737	83.128	Non
24 hpf	h18c3	51.17	133.033	83.128	Non
24 hpf	h18c3	51.17	122.237	83.128	Non
24 hpf	h19c1	53.656	198.915	87.169	Non
24 hpf	h19c1	53.656	186.122	87.169	Non
24 hpf	h19c1	53.656	170.402	87.169	Non
24 hpf	h19c1	53.656	151.798	87.169	Non
24 hpf	h19c1	53.656	135.42	87.169	Non
24 hpf	h19c1	53.656	125.424	87.169	Non
24 hpf	h19c2	34.852	244.048	56.595	Non
24 hpf	h19c2	34.852	222.014	56.595	Non
24 hpf	h19c2	34.852	189.099	56.595	Non
24 hpf	h19c2	34.852	154.7	56.595	Non
24 hpf	h19c2	34.852	135.449	56.595	Non
24 hpf	h19c2	34.852	124.917	56.595	Non
24 hpf	h19c2	34.852	116.1	56.595	Non
24 hpf	h20c1	59.005	212.305	95.863	Non
24 hpf	h20c1	59.005	207.183	95.863	Non
24 hpf	h20c1	59.005	197.592	95.863	Non
24 hpf	h20c1	59.005	183.182	95.863	Non
24 hpf	h20c1	59.005	165.559	95.863	Non
24 hpf	h20c2	43.498	160.579	70.651	Non
24 hpf	h20c2	43.498	142.928	70.651	Non
24 hpf	h20c2	43.498	132.845	70.651	Non
24 hpf	h20c2	43.498	121.782	70.651	Non
24 hpf	h20c2	43.498	112.672	70.651	Non
24 hpf	h20c2	43.498	106.72	70.651	Non
24 hpf	h20c3	54.953	202.946	89.261	Non
24 hpf	h20c3	54.953	180.372	89.261	Non
24 hpf	h20c3	54.953	154.136	89.261	Non
24 hpf	h20c3	56.898	153.355	92.451	Non
24 hpf	h20c3	56.898	139.111	92.451	Non
24 hpf	h20c3	56.898	128.691	92.451	Non
36 hpf	h9c1	40.147	265.704	65.198	Non
36 hpf	h9c1	40.147	259.043	65.198	Non
36 hpf	h9c1	40.147	246.167	65.198	Non
36 hpf	h9c1	40.147	230.208	65.198	Non
36 hpf	h9c1	40.147	214.26	65.198	Non
36 hpf	h9c1	40.147	200.553	65.198	Non
36 hpf	h9c2	53.224	306.379	86.452	Non
36 hpf	h9c2	53.224	295.117	86.452	Non
36 hpf	h9c2	53.224	267.252	86.452	Non
36 hpf	h9c2	53.224	227.064	86.452	Non
36 hpf	h9c2	53.224	205.093	86.452	Non
36 hpf	h9c2	53.224	175.198	86.452	Non
36 hpf	h9c2	53.224	152.141	86.452	Non
36 hpf	h9c2	53.224	138.219	86.452	Non
36 hpf	h9c3	37.932	331.749	61.583	Non
36 hpf	h9c3	37.932	361.079	61.583	Non
36 hpf	h9c3	37.932	367.677	61.583	Non
36 hpf	h9c3	37.932	352.77	61.583	Non
36 hpf	h9c3	41.336	311.909	67.137	Non
36 hpf	h9c3	41.336	264.382	67.137	Non
36 hpf	h9c3	41.336	215.688	67.137	Non
36 hpf	h9c3	41.336	187.407	67.137	Non
36 hpf	h9c3	41.336	161.443	67.137	Non
36 hpf	h9c4	50.252	278.348	81.609	Non
36 hpf	h9c4	50.252	282.21	81.609	Non
36 hpf	h9c4	48.415	309.748	78.636	Non
36 hpf	h9c4	48.415	292.864	78.636	Non
36 hpf	h9c4	48.415	268.473	78.636	Non
36 hpf	h9c4	48.415	229.982	78.636	Non
36 hpf	h9c4	48.415	194.272	78.636	Non
36 hpf	h9c4	48.415	172.049	78.636	Non
36 hpf	h10c1	62.572	261.304	101.657	Non
36 hpf	h10c1	62.572	249.114	101.657	Non
36 hpf	h10c1	62.572	223.16	101.657	Non
36 hpf	h10c1	62.572	186.25	101.657	Non
36 hpf	h10c1	62.572	156.546	101.657	Non
36 hpf	h10c1	62.572	137.401	101.657	Non
36 hpf	h10c1	62.572	128.689	101.657	Non
36 hpf	h10c2	48.847	260.208	79.343	Non
36 hpf	h10c2	48.847	249.631	79.343	Non
36 hpf	h10c2	48.847	223.054	79.343	Non
36 hpf	h10c2	47.874	248.438	77.751	Non
36 hpf	h10c2	47.874	231.365	77.751	Non
36 hpf	h10c2	47.874	208.399	77.751	Non
36 hpf	h10c2	47.874	185.806	77.751	Non
36 hpf	h10c2	47.874	172.189	77.751	Non
36 hpf	h10c3	45.605	237.684	74.068	Non
36 hpf	h10c3	45.605	203.062	74.068	Non
36 hpf	h10c3	45.605	180.232	74.068	Non
36 hpf	h10c3	55.493	213.512	90.161	Non
36 hpf	h10c3	55.493	193.957	90.161	Non
36 hpf	h10c3	55.493	165.403	90.161	Non
36 hpf	h10c3	55.493	143.77	90.161	Non
36 hpf	h10c3	55.493	130.697	90.161	Non
36 hpf	h10c4	40.201	214.665	65.268	Non
36 hpf	h10c4	40.201	222.925	65.268	Non
36 hpf	h10c4	40.201	219.157	65.268	Non
36 hpf	h10c4	40.201	204.942	65.268	Non
36 hpf	h10c4	40.201	183.85	65.268	Non
36 hpf	h10c4	40.201	166.064	65.268	Non
36 hpf	h10c4	40.201	152.609	65.268	Non
36 hpf	h11c1	51.062	296.484	82.95	Non
36 hpf	h11c1	51.062	316.382	82.95	Non
36 hpf	h11c1	51.062	306.363	82.95	Non
36 hpf	h11c1	56.952	335.481	92.522	Non
36 hpf	h11c1	56.952	288.823	92.522	Non
36 hpf	h11c1	56.952	221.151	92.522	Non
36 hpf	h11c1	56.952	182.713	92.522	Non
36 hpf	h11c2	53.602	245.984	87.077	Non
36 hpf	h11c2	53.602	262.069	87.077	Non
36 hpf	h11c2	53.602	258.649	87.077	Non
36 hpf	h11c2	53.602	236.383	87.077	Non
36 hpf	h11c2	52.467	244.451	85.222	Non
36 hpf	h11c2	52.467	224.119	85.222	Non
36 hpf	h11c3	50.306	241.029	81.706	Non
36 hpf	h11c3	50.306	254.781	81.706	Non
36 hpf	h11c3	50.306	252.002	81.706	Non
36 hpf	h11c3	51.387	240.358	83.466	Non
36 hpf	h11c3	51.387	215.107	83.466	Non
36 hpf	h12c1	42.471	265.024	68.962	Non
36 hpf	h12c1	42.471	263.62	68.962	Non
36 hpf	h12c1	42.471	243.377	68.962	Non
36 hpf	h12c1	42.471	218.796	68.962	Non
36 hpf	h12c1	42.471	200.086	68.962	Non
36 hpf	h12c1	42.471	182.104	68.962	Non
36 hpf	h12c2	56.952	269.793	92.521	Non
36 hpf	h12c2	56.952	263.78	92.521	Non
36 hpf	h12c2	56.952	238.824	92.521	Non
36 hpf	h12c2	56.952	211.517	92.521	Non
36 hpf	h12c2	56.952	182.167	92.521	Non
36 hpf	h12c2	56.952	157.457	92.521	Non
36 hpf	h12c3	52.305	267.596	84.964	Non
36 hpf	h12c3	52.305	293.005	84.964	Non
36 hpf	h12c3	52.305	288.941	84.964	Non
36 hpf	h12c3	50.954	304.512	82.756	Non
36 hpf	h12c3	50.954	271.073	82.756	Non
36 hpf	h12c3	50.954	194.942	82.756	Non
36 hpf	h12c3	50.954	177.701	82.756	Non
36 hpf	h12c3	50.954	168.561	82.756	Non
36 hpf	h12c4	41.822	311.864	67.921	Non
36 hpf	h12c4	41.822	286.39	67.921	Non
36 hpf	h12c4	41.822	255.899	67.921	Non
36 hpf	h12c4	41.822	230.799	67.921	Non
36 hpf	h12c4	41.822	206.389	67.921	Non
36 hpf	h12c4	41.822	174.339	67.921	Non
36 hpf	h12c4	41.822	151.281	67.921	Non
36 hpf	h13c1	55.169	306.709	89.63	Non
36 hpf	h13c1	55.169	323.207	89.63	Non
36 hpf	h13c1	55.169	303.531	89.63	Non
36 hpf	h13c1	55.169	276.168	89.63	Non
36 hpf	h13c1	55.169	238.201	89.63	Non
36 hpf	h13c1	55.169	203.255	89.63	Non
36 hpf	h13c1	55.169	184.79	89.63	Non
36 hpf	h13c2	48.523	303.194	78.82	Non
36 hpf	h13c2	48.523	318.098	78.82	Non
36 hpf	h13c2	48.523	303.729	78.82	Non
36 hpf	h13c2	50.144	280.832	81.449	Non
36 hpf	h13c2	50.144	236.873	81.449	Non
36 hpf	h13c2	50.144	200.821	81.449	Non
36 hpf	h13c2	50.144	182.037	81.449	Non
36 hpf	h13c2	50.144	164.331	81.449	Non
36 hpf	h13c3	37.932	259.987	61.599	Non
36 hpf	h13c3	37.932	265.724	61.599	Non
36 hpf	h13c3	37.932	253.058	61.599	Non
36 hpf	h13c3	37.932	221.006	61.599	Non
36 hpf	h13c3	42.039	247.826	68.264	Non
36 hpf	h13c3	42.039	221.604	68.264	Non
36 hpf	h13c3	42.039	200.54	68.264	Non
36 hpf	h13c3	42.039	178.378	68.264	Non
36 hpf	h13c4	39.607	296.658	64.314	Non
36 hpf	h13c4	39.607	286.212	64.314	Non
36 hpf	h13c4	50.198	294.71	81.542	Non
36 hpf	h13c4	50.198	282.506	81.542	Non
36 hpf	h13c4	50.198	252.686	81.542	Non
36 hpf	h13c4	50.198	224.501	81.542	Non
36 hpf	h13c4	50.198	198.144	81.542	Non
36 hpf	h13c4	50.198	178.694	81.542	Non
36 hpf	h14c1	55.979	302.37	90.946	Non
36 hpf	h14c1	55.979	308.099	90.946	Non
36 hpf	h14c1	55.979	301.438	90.946	Non
36 hpf	h14c1	55.979	281.828	90.946	Non
36 hpf	h14c1	55.979	249.741	90.946	Non
36 hpf	h14c1	55.979	213.14	90.946	Non
36 hpf	h14c1	55.979	189.808	90.946	Non
36 hpf	h14c1	55.979	165.368	90.946	Non
36 hpf	h14c1	55.979	143.056	90.946	Non
36 hpf	h14c1	55.979	129.433	90.946	Non
36 hpf	h14c2	50.738	290.531	82.415	Non
36 hpf	h14c2	50.738	290.804	82.415	Non
36 hpf	h14c2	50.738	287.113	82.415	Non
36 hpf	h14c2	50.738	275.857	82.415	Non
36 hpf	h14c2	51.819	294.36	84.182	Non
36 hpf	h14c2	51.819	261.004	84.182	Non
36 hpf	h14c2	51.819	232.488	84.182	Non
36 hpf	h14c2	51.819	198.867	84.182	Non
36 hpf	h14c2	51.819	167.423	84.182	Non
36 hpf	h14c2	51.819	148.329	84.182	Non
36 hpf	h14c2	51.819	135.096	84.182	Non
36 hpf	h14c3	46.523	237.109	75.57	Non
36 hpf	h14c3	46.523	227.707	75.57	Non
36 hpf	h14c3	46.523	220.445	75.57	Non
36 hpf	h14c3	47.172	226.081	76.609	Non
36 hpf	h14c3	47.172	206.251	76.609	Non
36 hpf	h14c3	47.172	186.275	76.609	Non
36 hpf	h14c3	47.172	171.11	76.609	Non
36 hpf	h14c3	47.172	158.087	76.609	Non
36 hpf	h14c4	33.771	296.795	54.837	Non
36 hpf	h14c4	33.771	289.114	54.837	Non
36 hpf	h14c4	33.771	272.939	54.837	Non
36 hpf	h14c4	40.255	287.935	65.38	Non
36 hpf	h14c4	40.255	259.761	65.38	Non
36 hpf	h14c4	40.255	228.114	65.38	Non
36 hpf	h14c4	40.255	201.829	65.38	Non
36 hpf	h14c4	40.255	178.077	65.38	Non
36 hpf	h14c4	40.255	158.716	65.38	Non
36 hpf	h14c4	40.255	145.585	65.38	Non
36 hpf	h16c1	49.711	297.69	80.75	Non
36 hpf	h16c1	49.711	293.911	80.75	Non
36 hpf	h16c1	49.711	257.398	80.75	Non
36 hpf	h16c1	49.711	221.708	80.75	Non
36 hpf	h16c1	49.711	181.634	80.75	Non
36 hpf	h16c1	49.711	159.909	80.75	Non
36 hpf	h16c1	49.711	146.886	80.75	Non
36 hpf	h16c2	54.142	280.872	87.957	Non
36 hpf	h16c2	54.142	273.698	87.957	Non
36 hpf	h16c2	54.142	243.371	87.957	Non
36 hpf	h16c2	54.142	202.514	87.957	Non
36 hpf	h16c2	54.142	175.437	87.957	Non
36 hpf	h16c2	54.142	143.654	87.957	Non
36 hpf	h16c2	54.142	127.019	87.957	Non
36 hpf	h16c3	54.142	280.872	87.957	Non
36 hpf	h16c3	54.142	273.698	87.957	Non
36 hpf	h16c3	54.142	243.371	87.957	Non
36 hpf	h16c3	54.142	202.514	87.957	Non
36 hpf	h16c3	54.142	175.437	87.957	Non
36 hpf	h16c3	54.142	143.654	87.957	Non
36 hpf	h16c3	54.142	127.019	87.957	Non
36 hpf	h16c4	41.066	274.014	66.684	Non
36 hpf	h16c4	41.066	269.842	66.684	Non
36 hpf	h16c4	41.606	267.476	67.579	Non
36 hpf	h16c4	41.606	235.442	67.579	Non
36 hpf	h16c4	41.606	198.76	67.579	Non
36 hpf	h16c4	41.606	179.756	67.579	Non
36 hpf	h16c4	41.606	163.851	67.579	Non
36 hpf	h16c4	41.606	152.73	67.579	Non
36 hpf	h16c4	41.606	144.514	67.579	Non
36 hpf	h17c1	48.631	329.951	78.993	Non
36 hpf	h17c1	48.631	326.024	78.993	Non
36 hpf	h17c1	48.631	311.614	78.993	Non
36 hpf	h17c1	48.631	290.926	78.993	Non
36 hpf	h17c1	48.631	266.243	78.993	Non
36 hpf	h17c1	50.9	277.761	82.692	Non
36 hpf	h17c1	50.9	244.96	82.692	Non
36 hpf	h17c1	50.9	223.554	82.692	Non
36 hpf	h17c1	50.9	196.886	82.692	Non
36 hpf	h17c1	50.9	175.152	82.692	Non
36 hpf	h17c2	33.339	298.366	54.123	Non
36 hpf	h17c2	33.339	271.598	54.123	Non
36 hpf	h17c2	33.339	226.824	54.123	Non
36 hpf	h17c2	45.119	228.214	73.28	Non
36 hpf	h17c2	45.119	207.823	73.28	Non
36 hpf	h17c2	45.119	190.392	73.28	Non
36 hpf	h17c2	45.119	176.503	73.28	Non
36 hpf	h17c2	45.119	160.567	73.28	Non
36 hpf	h17c2	45.119	148.695	73.28	Non
36 hpf	h17c3	38.797	358.341	63.003	Non
36 hpf	h17c3	38.797	340.583	63.003	Non
36 hpf	h17c3	38.797	315.682	63.003	Non
36 hpf	h17c3	41.931	311.614	68.108	Non
36 hpf	h17c3	41.931	273.652	68.108	Non
36 hpf	h17c3	41.931	237.159	68.108	Non
36 hpf	h17c3	41.931	205.297	68.108	Non
36 hpf	h17c3	41.931	180.952	68.108	Non
36 hpf	h17c3	41.931	162.78	68.108	Non
36 hpf	h17c4	46.469	349.767	75.49	Non
36 hpf	h17c4	46.469	329.229	75.49	Non
36 hpf	h17c4	51.495	325.275	83.654	Non
36 hpf	h17c4	51.495	288.253	83.654	Non
36 hpf	h17c4	51.495	263.248	83.654	Non
36 hpf	h17c4	51.495	234.568	83.654	Non
36 hpf	h17c4	51.495	202.289	83.654	Non
36 hpf	h17c4	51.495	173.321	83.654	Non
36 hpf	h17c4	51.495	151.622	83.654	Non
36 hpf	h17c4	51.495	138.801	83.654	Non
36 hpf	h17c4	51.495	129.592	83.654	Non
36 hpf	h18c1	56.033	235.893	91.028	Non
36 hpf	h18c1	56.033	213.788	91.028	Non
36 hpf	h18c1	56.033	183.811	91.028	Non
36 hpf	h18c1	56.033	154.482	91.028	Non
36 hpf	h18c1	56.033	130.593	91.028	Non
36 hpf	h18c1	56.033	119.38	91.028	Non
36 hpf	h18c1	56.033	109.897	91.028	Non
36 hpf	h18c2	44.146	253.119	71.697	Non
36 hpf	h18c2	49.549	247.439	80.499	Non
36 hpf	h18c2	49.549	225.517	80.499	Non
36 hpf	h18c2	49.549	195.601	80.499	Non
36 hpf	h18c2	50.954	212.664	82.771	Non
36 hpf	h18c2	50.954	191.968	82.771	Non
36 hpf	h18c2	50.954	165.507	82.771	Non
36 hpf	h18c2	50.954	150.54	82.771	Non
36 hpf	h18c2	50.954	134.428	82.771	Non
36 hpf	h18c2	50.954	122.27	82.771	Non
36 hpf	h18c3	47.496	267.969	77.147	Non
36 hpf	h18c3	47.496	267.802	77.147	Non
36 hpf	h18c3	47.496	249.51	77.147	Non
36 hpf	h18c3	47.496	215.047	77.147	Non
36 hpf	h18c3	50.252	204.638	81.62	Non
36 hpf	h18c3	50.252	179.811	81.62	Non
36 hpf	h18c3	50.252	164.909	81.62	Non
36 hpf	h18c3	50.252	151.588	81.62	Non
36 hpf	h18c3	50.252	136.865	81.62	Non
48 hpf	h9c1	51.765	255.135	84.081	Non
48 hpf	h9c1	46.794	251.094	76.018	Non
48 hpf	h9c1	46.794	245.694	76.018	Non
48 hpf	h9c1	46.794	224.717	76.018	Non
48 hpf	h9c1	46.794	200.009	76.018	Non
48 hpf	h9c1	46.794	173.837	76.018	Non
48 hpf	h9c1	46.794	158.35	76.018	Non
48 hpf	h9c1	46.794	140.715	76.018	Non
48 hpf	h9c2	48.036	250.275	78.053	Non
48 hpf	h9c2	48.036	246.387	78.053	Non
48 hpf	h9c2	48.036	234.922	78.053	Non
48 hpf	h9c2	48.036	216.547	78.053	Non
48 hpf	h9c2	46.145	239.367	74.949	Non
48 hpf	h9c2	46.145	224.853	74.949	Non
48 hpf	h9c2	46.145	204.52	74.949	Non
48 hpf	h9c2	46.145	183.021	74.949	Non
48 hpf	h9c2	46.145	157.251	74.949	Non
48 hpf	h9c3	45.659	256.978	74.17	Non
48 hpf	h9c3	45.659	254.226	74.17	Non
48 hpf	h9c3	45.659	240.827	74.17	Non
48 hpf	h9c3	45.659	214.511	74.17	Non
48 hpf	h9c3	45.659	185.64	74.17	Non
48 hpf	h9c3	45.659	164.409	74.17	Non
48 hpf	h9c3	45.659	149.798	74.17	Non
48 hpf	h9c3	45.659	138.78	74.17	Non
48 hpf	h9c4	52.143	250.038	84.713	Non
48 hpf	h9c4	52.143	249.628	84.713	Non
48 hpf	h9c4	52.143	239.779	84.713	Non
48 hpf	h9c4	52.143	218.795	84.713	Non
48 hpf	h9c4	52.143	190.595	84.713	Non
48 hpf	h9c4	52.143	160.852	84.713	Non
48 hpf	h9c4	52.143	144.234	84.713	Non
48 hpf	h10c1	41.877	241.954	68.021	Non
48 hpf	h10c1	41.877	228.957	68.021	Non
48 hpf	h10c1	41.877	219.325	68.021	Non
48 hpf	h10c1	42.309	217.837	68.711	Non
48 hpf	h10c1	42.309	212.008	68.711	Non
48 hpf	h10c1	42.309	197.093	68.711	Non
48 hpf	h10c1	42.309	180.782	68.711	Non
48 hpf	h10c1	42.309	160.956	68.711	Non
48 hpf	h10c2	34.42	194.539	55.883	Non
48 hpf	h10c2	34.42	190.384	55.883	Non
48 hpf	h10c2	34.42	183.186	55.883	Non
48 hpf	h10c2	34.42	175.839	55.883	Non
48 hpf	h10c2	42.309	207.231	68.711	Non
48 hpf	h10c2	42.309	185.656	68.711	Non
48 hpf	h10c2	42.309	169.721	68.711	Non
48 hpf	h10c2	42.309	157.231	68.711	Non
48 hpf	h10c2	42.309	146.943	68.711	Non
48 hpf	h10c3	37.878	183.378	61.511	Non
48 hpf	h10c3	37.878	182.568	61.511	Non
48 hpf	h10c3	37.878	179.95	61.511	Non
48 hpf	h10c3	37.878	177.157	61.511	Non
48 hpf	h10c3	46.415	178.384	75.395	Non
48 hpf	h10c3	46.415	173.919	75.395	Non
48 hpf	h11c1	49.549	308.498	80.49	Non
48 hpf	h11c1	49.549	287.527	80.49	Non
48 hpf	h11c1	49.549	252.662	80.49	Non
48 hpf	h11c1	51.441	238.156	83.558	Non
48 hpf	h11c1	51.441	218.13	83.558	Non
48 hpf	h11c1	51.441	198.406	83.558	Non
48 hpf	h11c1	51.441	175.048	83.558	Non
48 hpf	h11c2	50.576	348.479	82.147	Non
48 hpf	h11c2	50.576	334.993	82.147	Non
48 hpf	h11c2	50.576	306.519	82.147	Non
48 hpf	h11c2	50.576	273.664	82.147	Non
48 hpf	h11c2	50.954	260.105	82.769	Non
48 hpf	h11c2	50.954	231.061	82.769	Non
48 hpf	h11c2	50.954	199.208	82.769	Non
48 hpf	h11c2	50.954	170.969	82.769	Non
48 hpf	h11c3	40.634	300.516	65.995	Non
48 hpf	h11c3	40.634	293.996	65.995	Non
48 hpf	h11c3	40.526	284.715	65.819	Non
48 hpf	h11c3	40.526	256.787	65.819	Non
48 hpf	h11c3	40.526	229.922	65.819	Non
48 hpf	h11c3	40.526	204.62	65.819	Non
48 hpf	h11c3	40.526	177.916	65.819	Non
48 hpf	h11c4	44.038	322.568	71.517	Non
48 hpf	h11c4	44.038	317.46	71.517	Non
48 hpf	h11c4	44.038	299.473	71.517	Non
48 hpf	h11c4	48.577	362.331	78.907	Non
48 hpf	h11c4	48.577	350.139	78.907	Non
48 hpf	h11c4	48.577	323.792	78.907	Non
48 hpf	h11c4	48.577	279.039	78.907	Non
48 hpf	h11c4	48.577	239.941	78.907	Non
48 hpf	h11c4	47.928	220.758	77.859	Non
48 hpf	h11c4	47.928	182.617	77.859	Non
48 hpf	h11c4	47.928	156.418	77.859	Non
48 hpf	h12c1	37.013	307.475	60.095	Non
48 hpf	h12c1	37.013	297.005	60.095	Non
48 hpf	h12c1	37.013	278.58	60.095	Non
48 hpf	h12c1	37.013	249	60.095	Non
48 hpf	h12c1	37.013	217.719	60.095	Non
48 hpf	h12c1	37.013	193.35	60.095	Non
48 hpf	h12c2	50.522	303.498	82.07	Non
48 hpf	h12c2	50.522	293.901	82.07	Non
48 hpf	h12c2	50.522	273.133	82.07	Non
48 hpf	h12c2	50.522	243.683	82.07	Non
48 hpf	h12c2	50.522	214.842	82.07	Non
48 hpf	h12c2	50.522	193.72	82.07	Non
48 hpf	h12c3	53.386	227.936	86.713	Non
48 hpf	h12c3	53.386	207.531	86.713	Non
48 hpf	h12c3	53.386	190.156	86.713	Non
48 hpf	h12c3	53.386	174.253	86.713	Non
48 hpf	h12c3	53.386	153.4	86.713	Non
48 hpf	h12c4	49.82	298.03	80.935	Non
48 hpf	h12c4	49.82	280.046	80.935	Non
48 hpf	h12c4	49.82	251.663	80.935	Non
48 hpf	h12c4	49.82	216.271	80.935	Non
48 hpf	h12c4	49.82	184.632	80.935	Non
48 hpf	h12c4	49.82	165.662	80.935	Non
48 hpf	h13c1	42.687	279.84	69.319	Non
48 hpf	h13c1	42.687	270.873	69.319	Non
48 hpf	h13c1	42.687	250.803	69.319	Non
48 hpf	h13c1	42.687	221.808	69.319	Non
48 hpf	h13c1	42.687	197.619	69.319	Non
48 hpf	h13c1	42.687	174.97	69.319	Non
48 hpf	h13c2	42.957	261.158	69.771	Non
48 hpf	h13c2	42.957	258.473	69.771	Non
48 hpf	h13c2	42.957	249.14	69.771	Non
48 hpf	h13c2	42.957	231.942	69.771	Non
48 hpf	h13c2	42.957	218.898	69.771	Non
48 hpf	h13c2	42.957	196.184	69.771	Non
48 hpf	h13c2	42.957	173.791	69.771	Non
48 hpf	h13c3	37.013	295.063	60.101	Non
48 hpf	h13c3	37.013	285.18	60.101	Non
48 hpf	h13c3	35.771	315.26	58.072	Non
48 hpf	h13c3	35.771	299.386	58.072	Non
48 hpf	h13c3	35.771	267.159	58.072	Non
48 hpf	h13c3	35.771	225.628	58.072	Non
48 hpf	h13c3	35.771	197.83	58.072	Non
48 hpf	h13c3	35.771	180.59	58.072	Non
48 hpf	h13c4	46.74	268.861	75.925	Non
48 hpf	h13c4	46.74	276.609	75.925	Non
48 hpf	h13c4	46.74	268.18	75.925	Non
48 hpf	h13c4	52.197	275.124	84.8	Non
48 hpf	h13c4	52.197	263.702	84.8	Non
48 hpf	h13c4	52.197	241.252	84.8	Non
48 hpf	h13c4	52.197	216.702	84.8	Non
48 hpf	h13c4	52.197	195.584	84.8	Non
48 hpf	h13c4	52.197	176.86	84.8	Non
48 hpf	h14c1	41.877	291.195	68.008	Non
48 hpf	h14c1	41.877	276.942	68.008	Non
48 hpf	h14c1	45.605	254.013	74.063	Non
48 hpf	h14c1	45.605	224.123	74.063	Non
48 hpf	h14c1	45.605	192.19	74.063	Non
48 hpf	h14c1	45.605	170.075	74.063	Non
48 hpf	h14c1	45.605	149.455	74.063	Non
48 hpf	h14c1	45.605	131.716	74.063	Non
48 hpf	h14c2	44.902	305.512	72.923	Non
48 hpf	h14c2	44.902	307.573	72.923	Non
48 hpf	h14c2	44.902	285.145	72.923	Non
48 hpf	h14c2	44.902	243.193	72.923	Non
48 hpf	h14c2	44.902	211.652	72.923	Non
48 hpf	h14c2	44.902	191.377	72.923	Non
48 hpf	h14c2	44.902	174.34	72.923	Non
48 hpf	h14c3	44.902	294.634	72.937	Non
48 hpf	h14c3	44.902	276.142	72.937	Non
48 hpf	h14c3	44.902	255.965	72.937	Non
48 hpf	h14c3	50.684	269.837	82.323	Non
48 hpf	h14c3	50.684	265.932	82.323	Non
48 hpf	h14c3	50.684	255.165	82.323	Non
48 hpf	h14c3	50.684	240.441	82.323	Non
48 hpf	h14c3	50.684	207.999	82.323	Non
48 hpf	h14c4	45.173	222.606	73.359	Non
48 hpf	h14c4	45.173	220.223	73.359	Non
48 hpf	h14c4	45.173	201.891	73.359	Non
48 hpf	h14c4	45.173	181.079	73.359	Non
48 hpf	h14c4	45.173	167.655	73.359	Non
48 hpf	h14c4	45.173	153.262	73.359	Non
48 hpf	h15c1	43.552	260.397	70.737	Non
48 hpf	h15c1	43.552	272.547	70.737	Non
48 hpf	h15c1	43.552	264.095	70.737	Non
48 hpf	h15c1	43.443	244.532	70.574	Non
48 hpf	h15c1	43.443	196.644	70.574	Non
48 hpf	h15c1	43.443	168.721	70.574	Non
48 hpf	h15c1	43.443	153.369	70.574	Non
48 hpf	h15c1	43.443	139.638	70.574	Non
48 hpf	h15c1	43.443	125.399	70.574	Non
48 hpf	h15c2	58.627	364.082	95.251	Non
48 hpf	h15c2	58.627	336.939	95.251	Non
48 hpf	h15c2	58.627	289.856	95.251	Non
48 hpf	h15c2	58.627	251.789	95.251	Non
48 hpf	h15c2	58.627	212.097	95.251	Non
48 hpf	h15c2	58.627	170.364	95.251	Non
48 hpf	h15c2	58.627	170.364	95.251	Non
48 hpf	h15c3	46.361	262.304	75.311	Non
48 hpf	h15c3	46.361	266.716	75.311	Non
48 hpf	h15c3	46.361	248.762	75.311	Non
48 hpf	h15c3	49.603	281.875	80.586	Non
48 hpf	h15c3	49.603	238.738	80.586	Non
48 hpf	h15c3	49.603	191.261	80.586	Non
48 hpf	h15c3	49.603	159.897	80.586	Non
48 hpf	h15c3	49.603	142.908	80.586	Non
48 hpf	h16c1	38.743	265.584	62.914	Non
48 hpf	h16c1	38.743	266	62.914	Non
48 hpf	h16c1	38.743	248.945	62.914	Non
48 hpf	h16c1	37.608	233.06	61.068	Non
48 hpf	h16c1	37.608	213.852	61.068	Non
48 hpf	h16c1	37.608	197.409	61.068	Non
48 hpf	h16c1	37.608	180.185	61.068	Non
48 hpf	h16c2	41.066	282.62	66.69	Non
48 hpf	h16c2	41.066	288.993	66.69	Non
48 hpf	h16c2	41.066	277.359	66.69	Non
48 hpf	h16c2	41.066	254.808	66.69	Non
48 hpf	h16c2	41.066	233.727	66.69	Non
48 hpf	h16c3	41.877	264.663	68.009	Non
48 hpf	h16c3	41.877	267.997	68.009	Non
48 hpf	h16c3	41.877	256.297	68.009	Non
48 hpf	h16c3	41.877	232.82	68.009	Non
48 hpf	h16c3	41.877	208.507	68.009	Non
48 hpf	h16c3	41.877	190.234	68.009	Non
48 hpf	h16c3	41.877	171.228	68.009	Non
48 hpf	h16c4	47.172	281.461	76.622	Non
48 hpf	h16c4	47.172	294.999	76.622	Non
48 hpf	h16c4	47.172	286.973	76.622	Non
48 hpf	h16c4	44.146	282.994	71.7	Non
48 hpf	h16c4	44.146	245.085	71.7	Non
48 hpf	h16c4	44.146	215.776	71.7	Non
48 hpf	h16c4	44.146	198.264	71.7	Non
48 hpf	h16c4	44.146	185.282	71.7	Non
48 hpf	h16c4	44.146	173.132	71.7	Non
48 hpf	h17c1	64.571	283.934	104.912	Non
48 hpf	h17c1	64.571	272.137	104.912	Non
48 hpf	h17c1	64.571	255.648	104.912	Non
48 hpf	h17c1	66.03	229.098	107.288	Non
48 hpf	h17c1	66.03	196.872	107.288	Non
48 hpf	h17c1	66.03	166.596	107.288	Non
48 hpf	h17c1	64.733	162	105.173	Non
48 hpf	h17c1	64.733	144.5	105.173	Non
48 hpf	h17c2	51.278	302.68	83.276	Non
48 hpf	h17c2	51.278	285.094	83.276	Non
48 hpf	h17c2	51.278	255.165	83.276	Non
48 hpf	h17c2	51.278	231.348	83.276	Non
48 hpf	h17c2	51.278	200.203	83.276	Non
48 hpf	h17c2	51.278	175.919	83.276	Non
48 hpf	h17c2	51.278	158.056	83.276	Non
48 hpf	h17c2	51.278	147.838	83.276	Non
48 hpf	h17c3	49.603	299.122	80.582	Non
48 hpf	h17c3	49.603	300.006	80.582	Non
48 hpf	h17c3	49.603	283.086	80.582	Non
48 hpf	h17c3	49.603	252.996	80.582	Non
48 hpf	h17c3	54.142	264.982	87.965	Non
48 hpf	h17c3	54.142	249.818	87.965	Non
48 hpf	h17c3	54.142	226.81	87.965	Non
48 hpf	h17c3	54.142	203.664	87.965	Non
48 hpf	h17c4	32.853	307.198	53.323	Non
48 hpf	h17c4	32.853	299.347	53.323	Non
48 hpf	h17c4	45.389	297.543	73.728	Non
48 hpf	h17c4	45.389	288.45	73.728	Non
48 hpf	h17c4	45.389	261.264	73.728	Non
48 hpf	h17c4	46.037	234.651	74.772	Non
48 hpf	h17c4	46.037	216.734	74.772	Non
48 hpf	h17c4	46.037	202.835	74.772	Non
48 hpf	h17c4	46.037	189.865	74.772	Non
48 hpf	h17c4	46.037	171.286	74.772	Non
72 hpf	h9c1	37.554	442.006	60.992	Non
72 hpf	h9c1	37.554	443.086	60.992	Non
72 hpf	h9c1	37.446	442.677	60.799	Non
72 hpf	h9c1	37.446	400.774	60.799	Non
72 hpf	h9c1	37.446	340.758	60.799	Non
72 hpf	h9c1	37.824	333.327	61.434	Non
72 hpf	h9c1	37.824	285.984	61.434	Non
72 hpf	h9c1	37.824	251.303	61.434	Non
72 hpf	h9c1	37.824	221.4	61.434	Non
72 hpf	h9c2	38.472	547.993	62.463	Non
72 hpf	h9c2	38.472	605.509	62.463	Non
72 hpf	h9c2	38.472	600.786	62.463	Non
72 hpf	h9c2	39.013	624.622	63.344	Non
72 hpf	h9c2	39.013	587.943	63.344	Non
72 hpf	h9c2	39.013	512.557	63.344	Non
72 hpf	h9c2	40.958	475.055	66.502	Non
72 hpf	h9c2	40.958	387.9	66.502	Non
72 hpf	h9c2	40.958	314.635	66.502	Non
72 hpf	h9c2	40.958	268.371	66.502	Non
72 hpf	h9c2	40.958	230.321	66.502	Non
72 hpf	h9c3	38.797	568.511	63.007	Non
72 hpf	h9c3	38.797	560.044	63.007	Non
72 hpf	h9c3	38.797	502.069	63.007	Non
72 hpf	h9c3	38.851	476.993	63.086	Non
72 hpf	h9c3	38.851	381.436	63.086	Non
72 hpf	h9c3	38.851	316.422	63.086	Non
72 hpf	h9c3	38.851	244.573	63.086	Non
72 hpf	h9c3	38.851	200.385	63.086	Non
72 hpf	h9c3	38.851	172.942	63.086	Non
72 hpf	h9c4	37.608	558.984	61.07	Non
72 hpf	h9c4	37.608	554.584	61.07	Non
72 hpf	h9c4	37.608	517.475	61.07	Non
72 hpf	h9c4	37.176	491.001	60.356	Non
72 hpf	h9c4	37.176	380.235	60.356	Non
72 hpf	h9c4	37.176	301.607	60.356	Non
72 hpf	h9c4	37.176	238.385	60.356	Non
72 hpf	h9c4	37.176	208.024	60.356	Non
72 hpf	h9c5	38.094	555.326	61.861	Non
72 hpf	h9c5	38.094	547.688	61.861	Non
72 hpf	h9c5	38.094	505.707	61.861	Non
72 hpf	h9c5	38.418	536.982	62.387	Non
72 hpf	h9c5	38.418	464.097	62.387	Non
72 hpf	h9c5	38.418	376.193	62.387	Non
72 hpf	h9c5	38.418	309.024	62.387	Non
72 hpf	h9c5	38.418	244.841	62.387	Non
72 hpf	h9c5	38.418	207.791	62.387	Non
72 hpf	h9c5	38.418	184.663	62.387	Non
72 hpf	h9c6	41.282	574.418	67.044	Non
72 hpf	h9c6	41.282	540.401	67.044	Non
72 hpf	h9c6	41.282	460.133	67.044	Non
72 hpf	h9c6	41.282	378.459	67.044	Non
72 hpf	h9c6	41.282	326.07	67.044	Non
72 hpf	h9c6	41.282	256.095	67.044	Non
72 hpf	h9c6	41.282	204.681	67.044	Non
72 hpf	h9c6	41.282	173.708	67.044	Non
72 hpf	h10c1	34.906	683.873	56.687	Non
72 hpf	h10c1	34.906	683.873	56.687	Non
72 hpf	h10c1	34.906	635.063	56.687	Non
72 hpf	h10c1	34.906	510.081	56.687	Non
72 hpf	h10c1	34.906	405.526	56.687	Non
72 hpf	h10c1	34.906	342.118	56.687	Non
72 hpf	h10c1	34.906	269.657	56.687	Non
72 hpf	h10c1	34.906	212.748	56.687	Non
72 hpf	h10c2	36.365	392.3	59.042	Non
72 hpf	h10c2	36.365	425.462	59.042	Non
72 hpf	h10c2	36.797	498.414	59.746	Non
72 hpf	h10c2	36.797	481.493	59.746	Non
72 hpf	h10c2	36.797	443.845	59.746	Non
72 hpf	h10c2	36.797	382.201	59.746	Non
72 hpf	h10c2	36.797	302.775	59.746	Non
72 hpf	h10c2	36.797	249.283	59.746	Non
72 hpf	h10c2	36.797	217.635	59.746	Non
72 hpf	h10c3	32.907	466.545	53.422	Non
72 hpf	h10c3	32.907	475.94	53.422	Non
72 hpf	h10c3	32.907	445.493	53.422	Non
72 hpf	h10c3	36.851	549.879	59.834	Non
72 hpf	h10c3	36.851	513.297	59.834	Non
72 hpf	h10c3	36.851	423.178	59.834	Non
72 hpf	h10c3	36.851	342.502	59.834	Non
72 hpf	h10c3	36.851	285.997	59.834	Non
72 hpf	h10c3	36.851	241.417	59.834	Non
72 hpf	h10c4	31.232	506.503	50.696	Non
72 hpf	h10c4	31.232	510.416	50.696	Non
72 hpf	h10c4	31.232	485.322	50.696	Non
72 hpf	h10c4	32.042	510.822	52.007	Non
72 hpf	h10c4	32.042	466.19	52.007	Non
72 hpf	h10c4	32.042	371.191	52.007	Non
72 hpf	h10c4	32.042	288.826	52.007	Non
72 hpf	h10c4	32.042	244.002	52.007	Non
72 hpf	h10c5	40.796	529.003	66.244	Non
72 hpf	h10c5	40.796	555.75	66.244	Non
72 hpf	h10c5	40.796	516.779	66.244	Non
72 hpf	h10c5	43.443	480.611	70.554	Non
72 hpf	h10c5	43.443	419.266	70.554	Non
72 hpf	h10c5	43.443	371.58	70.554	Non
72 hpf	h10c5	43.443	324.11	70.554	Non
[truncated: 338 more rows]
