# Supplementary material for: Stepwise polarisation of developing bilayered epidermis is mediated by aPKC and E-cadherin in zebrafish
Source: eLife. 2020 Jan 22;9:e49064. doi: 10.7554/eLife.49064 (PMC6975926; doi:10.7554/eLife.49064)
Supplement: Figure 2—figure supplement 3—source data 1. [file elife-49064-fig2-figsupp3-data1.csv]

Genotype	Cell.name	Area	Mean	Length	Boundary
aPKC sib	h2c1	56.554	441.44	86.787	Non
aPKC sib	h2c1	56.554	562.139	86.787	Non
aPKC sib	h2c1	54.738	623.168	83.988	Non
aPKC sib	h2c1	54.738	645.135	83.988	Non
aPKC sib	h2c1	54.314	695.101	83.343	Non
aPKC sib	h2c1	54.314	675.195	83.343	Non
aPKC sib	h2c1	53.951	760.481	82.769	Non
aPKC sib	h2c1	55.162	810.403	84.659	Non
aPKC sib	h2c1	54.253	870.78	83.243	Non
aPKC sib	h2c1	54.314	878.142	83.346	Non
aPKC sib	h2c1	53.406	878.292	81.944	Non
aPKC sib	h2c1	53.345	920.93	81.858	Non
aPKC sib	h2c1	53.527	1024.118	82.121	Non
aPKC sib	h2c1	52.134	984.726	79.979	Non
aPKC sib	h13c1	64.91	298.388	99.623	Non
aPKC sib	h13c1	64.91	360.229	99.623	Non
aPKC sib	h13c1	64.91	390.633	99.623	Non
aPKC sib	h13c1	64.91	401.227	99.623	Non
aPKC sib	h13c1	64.85	599.389	99.537	Non
aPKC sib	h13c1	64.85	642.742	99.537	Non
aPKC sib	h13c1	64.85	648.092	99.537	Non
aPKC sib	h13c1	64.426	759.763	98.885	Non
aPKC sib	h13c1	64.426	773.463	98.885	Non
aPKC sib	h13c1	64.426	792.369	98.885	Non
aPKC sib	h13c1	64.426	791.32	98.885	Non
aPKC sib	h13c1	64.426	791.571	98.885	Non
aPKC sib	h13c1	64.426	782.172	98.885	Non
aPKC sib	h13c3	61.217	369.129	93.962	Non
aPKC sib	h13c3	61.217	425.906	93.962	Non
aPKC sib	h13c3	61.217	457.766	93.962	Non
aPKC sib	h13c3	61.217	452.884	93.962	Non
aPKC sib	h13c3	61.217	463.986	93.962	Non
aPKC sib	h13c3	61.217	498.662	93.962	Non
aPKC sib	h13c3	62.307	666.309	95.625	Non
aPKC sib	h13c3	62.307	691.615	95.625	Non
aPKC sib	h13c3	62.307	707.766	95.625	Non
aPKC sib	h13c3	62.307	723.215	95.625	Non
aPKC sib	h13c3	55.888	916.857	85.762	Non
aPKC sib	h13c3	55.888	894.238	85.762	Non
aPKC sib	h13c3	55.888	812.643	85.762	Non
aPKC sib	h13c3	55.888	736.221	85.762	Non
aPKC sib	h15c1	44.868	296.097	68.83	Non
aPKC sib	h15c1	44.868	339.987	68.83	Non
aPKC sib	h15c1	44.384	494.459	68.082	Non
aPKC sib	h15c1	44.384	506.901	68.082	Non
aPKC sib	h15c1	44.384	572.522	68.082	Non
aPKC sib	h15c1	43.415	762.793	66.6	Non
aPKC sib	h15c1	43.415	807.408	66.6	Non
aPKC sib	h15c1	43.415	856.108	66.6	Non
aPKC sib	h15c1	43.415	884.592	66.6	Non
aPKC sib	h15c1	45.595	925.065	69.96	Non
aPKC sib	h15c1	45.595	888.572	69.96	Non
aPKC sib	h15c1	45.595	829.796	69.96	Non
aPKC sib	h15c1	46.321	738.754	71.072	Non
aPKC sib	h15c2	37.118	427.628	56.922	Non
aPKC sib	h15c2	37.118	479.842	56.922	Non
aPKC sib	h15c2	37.118	579.249	56.922	Non
aPKC sib	h15c2	37.118	631.35	56.922	Non
aPKC sib	h15c2	39.116	699.808	59.998	Non
aPKC sib	h15c2	39.116	796.571	59.998	Non
aPKC sib	h15c2	39.116	875.025	59.998	Non
aPKC sib	h15c2	39.116	947.214	59.998	Non
aPKC sib	h15c2	39.116	949.229	59.998	Non
aPKC sib	h15c2	39.116	969.831	59.998	Non
aPKC sib	h15c2	39.116	946.761	59.998	Non
aPKC sib	h15c2	36.088	1040.962	55.358	Non
aPKC sib	h15c2	36.088	1052.872	55.358	Non
aPKC sib	h15c2	36.088	1033.256	55.358	Non
aPKC sib	h15c2	32.031	1049.37	49.114	Non
aPKC sib	h15c2	32.031	1035.297	49.114	Non
aPKC sib	h15c3	50.742	323.338	77.851	Non
aPKC sib	h15c3	50.742	382.255	77.851	Non
aPKC sib	h15c3	50.742	498.349	77.851	Non
aPKC sib	h15c3	50.742	579.251	77.851	Non
aPKC sib	h15c3	50.681	703.15	77.749	Non
aPKC sib	h15c3	50.681	770.314	77.749	Non
aPKC sib	h15c3	50.136	921.2	76.915	Non
aPKC sib	h15c3	50.136	979.551	76.915	Non
aPKC sib	h15c3	50.136	953.352	76.915	Non
aPKC sib	h15c3	50.136	888.572	76.915	Non
aPKC sib	h15c3	48.198	994.274	73.948	Non
aPKC sib	h15c3	48.198	977.431	73.948	Non
aPKC sib	h15c3	48.198	982.008	73.948	Non
aPKC sib	h15c3	44.565	953.557	68.359	Non
aPKC sib	h15c3	44.565	973.939	68.359	Non
aPKC sib	h15c4	56.312	329.155	86.397	Non
aPKC sib	h15c4	58.31	316.045	89.481	Non
aPKC sib	h15c4	58.31	394.137	89.481	Non
aPKC sib	h15c4	58.31	461.19	89.481	Non
aPKC sib	h15c4	58.31	498.215	89.481	Non
aPKC sib	h15c4	56.131	716.696	86.127	Non
aPKC sib	h15c4	56.131	777.016	86.127	Non
aPKC sib	h15c4	56.131	807.344	86.127	Non
aPKC sib	h15c4	56.131	807.517	86.127	Non
aPKC sib	h15c4	56.131	820.512	86.127	Non
aPKC sib	h15c4	58.25	883.493	89.378	Non
aPKC sib	h15c4	58.25	932.033	89.378	Non
aPKC sib	h15c4	58.613	1013.959	89.95	Non
aPKC sib	h15c4	58.613	981.968	89.95	Non
aPKC sib	h15c4	58.674	925.923	90.048	Non
aPKC sib	h15c4	58.674	904.322	90.048	Non
aPKC sib	h15c4	58.674	835.417	90.048	Non
aPKC sib	h15c5	41.962	439.434	64.377	Non
aPKC sib	h15c5	41.962	528.464	64.377	Non
aPKC sib	h15c5	41.962	620.106	64.377	Non
aPKC sib	h15c5	41.962	715.111	64.377	Non
aPKC sib	h15c5	41.962	780.765	64.377	Non
aPKC sib	h15c5	41.962	844.727	64.377	Non
aPKC sib	h15c5	41.962	925.097	64.377	Non
aPKC sib	h15c5	41.962	970.915	64.377	Non
aPKC sib	h15c5	40.751	1035.999	62.495	Non
aPKC sib	h15c5	40.751	990.323	62.495	Non
aPKC sib	h15c5	40.751	988.103	62.495	Non
aPKC sib	h15c5	40.751	903.331	62.495	Non
aPKC sib	h15c5	40.751	903.331	62.495	Non
aPKC sib	h15c5	37.299	1063.645	57.218	Non
aPKC sib	h15c5	37.299	1077.93	57.218	Non
aPKC sib	h16c1	48.38	305.808	74.225	Non
aPKC sib	h16c1	48.38	404.294	74.225	Non
aPKC sib	h16c1	48.38	508.337	74.225	Non
aPKC sib	h16c1	48.38	561.02	74.225	Non
aPKC sib	h16c1	48.38	605.918	74.225	Non
aPKC sib	h16c1	48.38	603.072	74.225	Non
aPKC sib	h16c1	48.501	696.401	74.407	Non
aPKC sib	h16c1	48.501	720.113	74.407	Non
aPKC sib	h16c1	48.501	741.395	74.407	Non
aPKC sib	h16c1	48.501	756.206	74.407	Non
aPKC sib	h16c1	48.501	761.461	74.407	Non
aPKC sib	h16c1	48.501	724.332	74.407	Non
aPKC sib	h16c1	46.14	761.334	70.796	Non
aPKC sib	h16c1	45.171	733.396	69.298	Non
aPKC sib	h16c1	42.083	729.525	64.553	Non
aPKC sib	h16c3	44.929	430.957	68.923	Non
aPKC sib	h16c3	44.929	575.907	68.923	Non
aPKC sib	h16c3	44.929	728.303	68.923	Non
aPKC sib	h16c3	44.929	803.278	68.923	Non
aPKC sib	h16c3	44.929	867.232	68.923	Non
aPKC sib	h16c3	44.989	991.062	69.024	Non
aPKC sib	h16c3	44.989	1059.965	69.024	Non
aPKC sib	h16c3	44.989	1082.757	69.024	Non
aPKC sib	h16c3	44.989	1108.884	69.024	Non
aPKC sib	h16c3	44.989	1110.876	69.024	Non
aPKC sib	h16c3	44.989	1075.004	69.024	Non
aPKC sib	h16c3	44.686	1023.782	68.548	Non
aPKC sib	h16c3	44.686	987.477	68.548	Non
aPKC sib	h16c4	63.154	380.493	96.909	Non
aPKC sib	h16c4	63.154	480.319	96.909	Non
aPKC sib	h16c4	63.094	665.771	96.826	Non
aPKC sib	h16c4	63.094	695.821	96.826	Non
aPKC sib	h16c4	62.973	620.479	96.645	Non
aPKC sib	h16c4	62.973	653.698	96.645	Non
aPKC sib	h16c4	62.973	748.994	96.645	Non
aPKC sib	h16c4	62.186	946.327	95.447	Non
aPKC sib	h16c4	62.186	982.718	95.447	Non
aPKC sib	h16c4	62.186	963.808	95.447	Non
aPKC sib	h16c4	62.186	907.201	95.447	Non
aPKC sib	h16c4	62.186	896.472	95.447	Non
aPKC sib	h16c4	62.186	833.85	95.447	Non
aPKC sib	h16c4	62.186	777.547	95.447	Non
aPKC sib	h17c1	63.336	123.7	97.195	Non
aPKC sib	h17c1	63.336	159.285	97.195	Non
aPKC sib	h17c1	65.032	200.239	99.81	Non
aPKC sib	h17c1	65.032	215.684	99.81	Non
aPKC sib	h17c1	65.032	215.401	99.81	Non
aPKC sib	h17c1	65.032	216.189	99.81	Non
aPKC sib	h17c1	65.032	234.359	99.8	Non
aPKC sib	h17c1	64.971	277.964	99.709	Non
aPKC sib	h17c1	64.971	273.578	99.709	Non
aPKC sib	h17c1	64.971	263.881	99.709	Non
aPKC sib	h17c1	62.307	318.082	95.629	Non
aPKC sib	h17c1	62.307	313.836	95.629	Non
aPKC sib	h17c1	62.307	277.544	95.629	Non
aPKC sib	h17c1	62.307	244.014	95.629	Non
aPKC sib	h17c1	44.202	258.627	67.798	Non
aPKC sib	h17c2	46.503	133.937	71.338	Non
aPKC sib	h17c2	46.503	181.607	71.338	Non
aPKC sib	h17c2	46.261	240.014	70.966	Non
aPKC sib	h17c2	45.776	257.661	70.229	Non
aPKC sib	h17c2	45.776	234.079	70.229	Non
aPKC sib	h17c2	46.019	259.876	70.584	Non
aPKC sib	h17c2	43.112	293.822	66.125	Non
aPKC sib	h17c2	43.112	293.871	66.125	Non
aPKC sib	h17c2	43.112	277.111	66.125	Non
aPKC sib	h17c2	44.444	298.249	68.187	Non
aPKC sib	h17c2	44.444	294.356	68.187	Non
aPKC sib	h17c2	44.444	289.487	68.187	Non
aPKC sib	h17c2	44.747	361.664	68.641	Non
aPKC sib	h17c2	44.747	357.858	68.641	Non
aPKC sib	h17c2	44.747	349.893	68.641	Non
aPKC sib	h17c2	38.631	289.515	59.259	Non
aPKC sib	h17c2	38.631	267.042	59.259	Non
aPKC sib	h17c3	52.679	172.694	80.846	Non
aPKC sib	h17c3	52.679	215.794	80.846	Non
aPKC sib	h17c3	52.679	251.354	80.846	Non
aPKC sib	h17c3	52.498	268.767	80.557	Non
aPKC sib	h17c3	52.498	247.744	80.557	Non
aPKC sib	h17c3	52.498	243.346	80.557	Non
aPKC sib	h17c3	52.498	225.57	80.557	Non
aPKC sib	h17c3	52.013	224.703	79.802	Non
aPKC sib	h17c3	52.013	257.16	79.799	Non
aPKC sib	h17c3	52.013	247.735	79.799	Non
aPKC sib	h17c3	52.316	272.396	80.269	Non
aPKC sib	h17c3	52.316	278.853	80.269	Non
aPKC sib	h17c3	52.558	318.096	80.651	Non
aPKC sib	h17c3	52.558	297.241	80.651	Non
aPKC sib	h17c3	52.558	286.433	80.651	Non
aPKC sib	h17c3	52.558	273.692	80.651	Non
aPKC sib	h17c3	52.558	267.866	80.651	Non
aPKC sib	h17c3	52.558	258.599	80.651	Non
aPKC sib	h17c3	31.85	283.229	48.814	Non
aPKC sib	h17c4	38.752	142.623	59.434	Non
aPKC sib	h17c4	38.752	171.687	59.434	Non
aPKC sib	h17c4	38.752	177.384	59.434	Non
aPKC sib	h17c4	39.54	204.914	60.641	Non
aPKC sib	h17c4	39.54	199.302	60.641	Non
aPKC sib	h17c4	39.419	216.094	60.455	Non
aPKC sib	h17c4	39.419	212.418	60.455	Non
aPKC sib	h17c4	39.419	203.012	60.455	Non
aPKC sib	h17c4	39.782	284.077	61.025	Non
aPKC sib	h17c4	39.782	277.308	61.025	Non
aPKC sib	h17c4	39.782	258.204	61.025	Non
aPKC sib	h17c4	38.934	275.452	59.715	Non
aPKC sib	h17c4	38.934	253.587	59.715	Non
aPKC sib	h17c4	38.934	242.365	59.715	Non
aPKC sib	h17c4	38.934	239.737	59.715	Non
aPKC sib	h17c4	38.934	227.333	59.715	Non
aPKC sib	h17c4	38.934	206.194	59.715	Non
aPKC sib	h19c1	48.138	153.28	73.85	Non
aPKC sib	h19c1	48.138	184.669	73.85	Non
aPKC sib	h19c1	48.138	228.79	73.85	Non
aPKC sib	h19c1	48.138	251.536	73.85	Non
aPKC sib	h19c1	48.138	279.297	73.85	Non
aPKC sib	h19c1	48.138	292.041	73.85	Non
aPKC sib	h19c1	46.927	323.14	72.011	Non
aPKC sib	h19c1	46.927	322.11	72.011	Non
aPKC sib	h19c1	46.927	317.812	72.011	Non
aPKC sib	h19c1	48.743	359.444	74.784	Non
aPKC sib	h19c1	48.743	327.417	74.784	Non
aPKC sib	h19c1	48.743	285.974	74.784	Non
aPKC sib	h19c1	48.743	258.118	74.784	Non
aPKC sib	h19c1	42.022	269.725	64.46	Non
aPKC sib	h19c3	49.349	198.748	75.722	Non
aPKC sib	h19c3	55.586	241.142	85.29	Non
aPKC sib	h19c3	55.586	271.666	85.29	Non
aPKC sib	h19c3	55.586	282.626	85.29	Non
aPKC sib	h19c3	55.767	287.281	85.576	Non
aPKC sib	h19c3	55.767	316.197	85.576	Non
aPKC sib	h19c3	55.767	364.391	85.576	Non
aPKC sib	h19c3	54.556	361.15	83.713	Non
aPKC sib	h19c3	54.556	369.144	83.713	Non
aPKC sib	h19c3	54.556	351.04	83.713	Non
aPKC sib	h19c3	54.556	313.361	83.713	Non
aPKC sib	h19c3	54.556	295.76	83.713	Non
aPKC sib	h19c3	42.87	160.333	65.764	Non
aPKC sib	h19c4	42.87	198.1	65.764	Non
aPKC sib	h19c4	44.565	234.137	68.369	Non
aPKC sib	h19c4	44.565	235.52	68.369	Non
aPKC sib	h19c4	44.565	229.624	68.369	Non
aPKC sib	h19c4	44.141	261.948	67.726	Non
aPKC sib	h19c4	44.141	253.81	67.726	Non
aPKC sib	h19c4	44.141	255.454	67.726	Non
aPKC sib	h19c4	44.141	242.328	67.726	Non
aPKC sib	h19c4	44.141	230.299	67.726	Non
aPKC sib	h19c4	44.141	224.201	67.726	Non
aPKC sib	h19c4	44.141	223.458	67.726	Non
aPKC sib	h19c4	41.114	246.025	63.062	Non
aPKC sib	h19c4	41.114	242.512	63.062	Non
aPKC sib	h19c4	41.114	238.352	63.062	Non
aPKC sib	h19c4	41.114	231.606	63.062	Non
aPKC sib	h19c4	41.114	224.387	63.062	Non
aPKC sib	h20c2	51.408	177.447	78.876	Non
aPKC sib	h20c2	51.408	205.544	78.876	Non
aPKC sib	h20c2	51.044	243.605	78.309	Non
aPKC sib	h20c2	51.044	260.091	78.309	Non
aPKC sib	h20c2	51.044	321.285	78.315	Non
aPKC sib	h20c2	51.044	306.489	78.315	Non
aPKC sib	h20c2	51.044	306.582	78.315	Non
aPKC sib	h20c2	50.742	359.051	77.858	Non
aPKC sib	h20c2	50.742	386.801	77.858	Non
aPKC sib	h20c2	50.742	429.385	77.858	Non
aPKC sib	h20c2	50.318	514.061	77.206	Non
aPKC sib	h20c2	50.318	538.239	77.206	Non
aPKC sib	h20c2	50.318	526.284	77.206	Non
aPKC sib	h20c2	50.318	520.919	77.206	Non
aPKC sib	h20c2	48.622	561.19	74.598	Non
aPKC sib	h20c2	48.622	506.9	74.598	Non
aPKC sib	h20c3	53.587	172.313	82.223	Non
aPKC sib	h20c3	53.587	219.364	82.223	Non
aPKC sib	h20c3	53.587	242.888	82.223	Non
aPKC sib	h20c3	53.587	242.946	82.223	Non
aPKC sib	h20c3	53.709	257.769	82.427	Non
aPKC sib	h20c3	53.709	258.984	82.427	Non
aPKC sib	h20c3	53.587	334.808	82.221	Non
aPKC sib	h20c3	53.587	343.407	82.221	Non
aPKC sib	h20c3	53.042	347.127	81.386	Non
aPKC sib	h20c3	53.042	348.824	81.386	Non
aPKC sib	h20c3	52.861	372.765	81.095	Non
aPKC sib	h20c3	52.861	378.17	81.095	Non
aPKC sib	h20c3	52.861	380.693	81.095	Non
aPKC sib	h20c3	52.861	389.177	81.095	Non
aPKC sib	h20c3	53.042	413.427	81.384	Non
aPKC sib	h20c3	53.042	426.073	81.384	Non
aPKC sib	h20c4	37.42	165.507	57.377	Non
aPKC sib	h20c4	37.42	219.102	57.377	Non
aPKC sib	h20c4	37.42	223.845	57.377	Non
aPKC sib	h20c4	37.239	306.531	57.113	Non
aPKC sib	h20c4	37.239	322.428	57.113	Non
aPKC sib	h20c4	37.239	337.578	57.113	Non
aPKC sib	h20c4	37.239	355.111	57.113	Non
aPKC sib	h20c4	37.299	367.856	57.196	Non
aPKC sib	h20c4	37.299	405.633	57.196	Non
aPKC sib	h20c4	37.299	415.54	57.196	Non
aPKC sib	h20c4	38.874	405.61	59.622	Non
aPKC sib	h20c4	38.874	438.364	59.622	Non
aPKC sib	h20c4	38.874	435.219	59.622	Non
aPKC sib	h20c4	38.874	431.535	59.622	Non
aPKC sib	h20c4	38.874	403.033	59.622	Non
aPKC sib	h20c4	38.874	378.775	59.622	Non
aPKC sib	h21c3	54.253	152.523	83.239	Non
aPKC sib	h21c3	54.253	223.118	83.239	Non
aPKC sib	h21c3	55.041	262.382	84.464	Non
aPKC sib	h21c3	55.041	283.313	84.464	Non
aPKC sib	h21c3	55.041	283.847	84.464	Non
aPKC sib	h21c3	55.041	313.22	84.462	Non
aPKC sib	h21c3	55.101	359.222	84.559	Non
aPKC sib	h21c3	55.101	385.93	84.559	Non
aPKC sib	h21c3	55.162	403.287	84.65	Non
aPKC sib	h21c3	55.041	423.835	84.466	Non
aPKC sib	h21c3	55.041	429.634	84.466	Non
aPKC sib	h21c3	55.041	436.287	84.466	Non
aPKC sib	h21c3	55.041	438.191	84.466	Non
aPKC sib	h21c3	55.041	414.886	84.466	Non
aPKC sib	h21c4	39.842	140.124	61.12	Non
aPKC sib	h21c4	39.842	212.112	61.12	Non
aPKC sib	h21c4	39.842	253.79	61.12	Non
aPKC sib	h21c4	39.842	280.532	61.12	Non
aPKC sib	h21c4	39.842	294.304	61.12	Non
aPKC sib	h21c4	41.235	332.525	63.241	Non
aPKC sib	h21c4	41.235	360.235	63.241	Non
aPKC sib	h21c4	41.235	371.837	63.241	Non
aPKC sib	h21c4	41.235	380.746	63.241	Non
aPKC sib	h21c4	41.235	386.155	63.241	Non
aPKC sib	h21c4	41.235	402.236	63.241	Non
aPKC sib	h21c4	41.235	438.702	63.241	Non
aPKC sib	h21c4	41.235	463.103	63.241	Non
aPKC sib	h21c4	41.235	464.692	63.241	Non
aPKC sib	h21c4	41.235	452.776	63.241	Non
aPKC sib	h21c4	38.208	441.42	58.594	Non
aPKC sib	h21c4	38.208	414.308	58.594	Non
aPKC sib	h22c1	46.321	185.241	71.066	Non
aPKC sib	h22c1	46.321	236.364	71.066	Non
aPKC sib	h22c1	46.321	332.51	71.066	Non
aPKC sib	h22c1	46.321	395.651	71.066	Non
aPKC sib	h22c1	47.169	466.2	72.351	Non
aPKC sib	h22c1	47.169	482.406	72.351	Non
aPKC sib	h22c1	47.169	551.949	72.363	Non
aPKC sib	h22c1	47.29	611.702	72.545	Non
aPKC sib	h22c1	47.29	641.704	72.545	Non
aPKC sib	h22c1	47.29	633.537	72.545	Non
aPKC sib	h22c1	47.29	651.054	72.549	Non
aPKC sib	h22c1	47.411	665.87	72.728	Non
aPKC sib	h22c1	47.411	623.361	72.728	Non
aPKC sib	h22c1	47.411	586.979	72.728	Non
aPKC sib	h22c2	39.903	236.656	61.204	Non
aPKC sib	h22c2	39.903	338.662	61.204	Non
aPKC sib	h22c2	39.903	396.371	61.204	Non
aPKC sib	h22c2	39.721	521.845	60.937	Non
aPKC sib	h22c2	39.721	537.649	60.937	Non
aPKC sib	h22c2	39.721	583.005	60.944	Non
aPKC sib	h22c2	39.721	593.278	60.944	Non
aPKC sib	h22c2	39.963	615.775	61.277	Non
aPKC sib	h22c2	39.963	590.2	61.277	Non
aPKC sib	h22c2	39.963	616.876	61.277	Non
aPKC sib	h22c2	39.54	718.547	60.647	Non
aPKC sib	h22c2	39.54	673.49	60.647	Non
aPKC sib	h22c2	39.54	637.269	60.647	Non
aPKC sib	h22c2	39.54	594.331	60.647	Non
aPKC sib	h22c2	40.085	557.64	61.483	Non
aPKC sib	h22c2	42.809	547.871	65.666	Non
aPKC sib	h22c2	42.809	524.256	65.666	Non
aPKC sib	h22c3	41.175	284.309	63.163	Non
aPKC sib	h22c3	41.175	357.367	63.163	Non
aPKC sib	h22c3	40.872	465.14	62.699	Non
aPKC sib	h22c3	40.872	485.253	62.699	Non
aPKC sib	h22c3	40.872	536.888	62.694	Non
aPKC sib	h22c3	40.872	554.594	62.694	Non
aPKC sib	h22c3	40.872	558.734	62.694	Non
aPKC sib	h22c3	41.175	521.589	63.16	Non
aPKC sib	h22c3	41.175	542.937	63.16	Non
aPKC sib	h22c3	41.175	551.277	63.16	Non
aPKC sib	h22c3	41.175	526.918	63.16	Non
aPKC sib	h22c3	43.354	516.683	66.505	Non
aPKC sib	h22c3	43.354	509.232	66.505	Non
aPKC sib	h24c1	47.01	314.08	76.362	Non
aPKC sib	h24c1	47.01	312.135	76.362	Non
aPKC sib	h24c1	47.55	298.998	77.229	Non
aPKC sib	h24c1	47.55	321.302	77.229	Non
aPKC sib	h24c1	47.55	331.197	77.229	Non
aPKC sib	h24c1	46.794	384.098	76.006	Non
aPKC sib	h24c1	46.794	374.232	76.006	Non
aPKC sib	h24c1	46.794	360.877	76.006	Non
aPKC sib	h24c1	46.794	345.017	76.006	Non
aPKC sib	h24c1	46.794	337.64	76.006	Non
aPKC sib	h24c1	46.632	347.637	75.745	Non
aPKC sib	h24c1	46.632	349.335	75.745	Non
aPKC sib	h24c1	46.632	334.522	75.745	Non
aPKC sib	h24c2	43.011	189.001	69.859	Non
aPKC sib	h24c2	43.011	229.744	69.859	Non
aPKC sib	h24c2	43.011	268.135	69.859	Non
aPKC sib	h24c2	43.011	296.068	69.859	Non
aPKC sib	h24c2	43.011	324.773	69.859	Non
aPKC sib	h24c2	43.011	344.469	69.859	Non
aPKC sib	h24c2	43.011	354.591	69.859	Non
aPKC sib	h24c2	43.011	366.095	69.859	Non
aPKC sib	h24c2	43.011	372.729	69.859	Non
aPKC sib	h24c2	42.417	469.959	68.902	Non
aPKC sib	h24c2	42.417	473.289	68.902	Non
aPKC sib	h24c2	41.931	541.166	68.084	Non
aPKC sib	h24c2	41.931	554.846	68.084	Non
aPKC sib	h24c2	41.931	546.897	68.084	Non
aPKC sib	h24c2	41.931	521.856	68.084	Non
aPKC sib	h24c2	41.931	475.693	68.084	Non
aPKC mut	h2c1	40.569	238.226	62.231	Non
aPKC mut	h2c1	40.569	260.567	62.231	Non
aPKC mut	h2c1	40.569	297.774	62.231	Non
aPKC mut	h2c1	40.751	319.022	62.518	Non
aPKC mut	h2c1	40.751	327.01	62.518	Non
aPKC mut	h2c1	40.508	353.927	62.125	Non
aPKC mut	h2c1	41.053	382.985	62.976	Non
aPKC mut	h2c1	40.932	401.715	62.791	Non
aPKC mut	h2c1	40.932	420.235	62.787	Non
aPKC mut	h2c1	40.811	456.023	62.596	Non
aPKC mut	h2c1	40.811	463.953	62.602	Non
aPKC mut	h2c1	40.932	473.208	62.789	Non
aPKC mut	h2c1	41.901	459.933	64.281	Non
aPKC mut	h2c1	36.452	447.803	55.902	Non
aPKC mut	h2c1	36.452	467.813	55.902	Non
aPKC mut	h2c1	36.452	441.244	55.902	Non
aPKC mut	h2c2	43.475	269.728	66.689	Non
aPKC mut	h2c2	43.475	299.999	66.689	Non
aPKC mut	h2c2	43.475	348.407	66.689	Non
aPKC mut	h2c2	43.475	383.28	66.687	Non
aPKC mut	h2c2	44.626	439.948	68.459	Non
aPKC mut	h2c2	44.626	466.025	68.459	Non
aPKC mut	h2c2	44.626	498.372	68.449	Non
aPKC mut	h2c2	44.686	514.948	68.551	Non
aPKC mut	h2c2	44.626	510.685	68.463	Non
aPKC mut	h2c2	44.626	512.905	68.463	Non
aPKC mut	h2c2	43.778	513.573	67.166	Non
aPKC mut	h2c2	43.536	491.349	66.791	Non
aPKC mut	h2c2	43.354	542.073	66.492	Non
aPKC mut	h2c2	35.18	585.959	53.952	Non
aPKC mut	h2c2	35.18	568.042	53.952	Non
aPKC mut	h2c5	43.112	353.329	66.14	Non
aPKC mut	h2c5	43.112	394.742	66.14	Non
aPKC mut	h2c5	42.809	466.123	65.683	Non
aPKC mut	h2c5	42.809	429.504	65.683	Non
aPKC mut	h2c5	42.809	392.899	65.683	Non
aPKC mut	h2c5	42.809	364.904	65.683	Non
aPKC mut	h2c5	42.809	482.611	65.672	Non
aPKC mut	h2c5	42.809	459.742	65.672	Non
aPKC mut	h2c5	42.809	433.776	65.672	Non
aPKC mut	h2c5	41.114	398.383	63.07	Non
aPKC mut	h2c5	39.116	457.527	59.996	Non
aPKC mut	h2c5	39.116	451.652	59.996	Non
aPKC mut	h2c5	39.54	464.03	60.652	Non
aPKC mut	h2c5	38.874	435.56	59.622	Non
aPKC mut	h2c5	38.389	425.01	58.89	Non
aPKC mut	h2c5	36.209	420.05	55.525	Non
aPKC mut	h2c5	33.061	470.45	50.7	Non
aPKC mut	h2c5	33	436.484	50.598	Non
aPKC mut	h4c1	46.806	284.394	71.797	Non
aPKC mut	h4c1	46.806	425.797	71.797	Non
aPKC mut	h4c1	45.231	476.985	69.377	Non
aPKC mut	h4c1	45.474	586.445	69.772	Non
aPKC mut	h4c1	45.837	605.908	70.316	Non
aPKC mut	h4c1	45.837	529.827	70.306	Non
aPKC mut	h4c1	46.2	535.302	70.869	Non
aPKC mut	h4c1	45.595	654.853	69.941	Non
aPKC mut	h4c1	45.413	723.531	69.664	Non
aPKC mut	h4c1	42.507	768.599	65.197	Non
aPKC mut	h4c1	40.206	765.042	61.674	Non
aPKC mut	h4c1	40.206	725.091	61.674	Non
aPKC mut	h4c1	39.782	684.319	61.021	Non
aPKC mut	h4c3	41.78	219.73	64.092	Non
aPKC mut	h4c3	41.841	316.585	64.172	Non
aPKC mut	h4c3	41.719	382.764	63.993	Non
aPKC mut	h4c3	41.719	383.05	63.993	Non
aPKC mut	h4c3	41.78	451.926	64.079	Non
aPKC mut	h4c3	41.78	476.483	64.079	Non
aPKC mut	h4c3	41.78	503.404	64.079	Non
aPKC mut	h4c3	41.538	564.284	63.717	Non
aPKC mut	h4c3	41.538	565.733	63.717	Non
aPKC mut	h4c3	41.538	558.148	63.717	Non
aPKC mut	h4c3	41.962	549.569	64.358	Non
aPKC mut	h4c3	41.962	538.14	64.358	Non
aPKC mut	h4c3	42.446	497.113	65.123	Non
aPKC mut	h4c3	42.446	492.315	65.123	Non
aPKC mut	h4c3	42.022	520.388	64.452	Non
aPKC mut	h4c3	42.022	492.263	64.452	Non
aPKC mut	h4c4	40.387	164.336	61.941	Non
aPKC mut	h4c4	40.387	239.575	61.941	Non
aPKC mut	h4c4	40.387	350.637	61.947	Non
aPKC mut	h4c4	40.387	328.937	61.945	Non
aPKC mut	h4c4	40.387	301.103	61.945	Non
aPKC mut	h4c4	40.508	354.365	62.132	Non
aPKC mut	h4c4	40.508	353.586	62.132	Non
aPKC mut	h4c4	40.508	319.662	62.132	Non
aPKC mut	h4c4	41.114	325.561	63.043	Non
aPKC mut	h4c4	41.114	325.323	63.043	Non
aPKC mut	h4c4	41.114	315.677	63.043	Non
aPKC mut	h4c4	41.417	352.049	63.522	Non
aPKC mut	h4c4	42.446	347.881	65.102	Non
aPKC mut	h4c4	42.446	354.705	65.102	Non
aPKC mut	h4c4	41.538	390.305	63.707	Non
aPKC mut	h4c4	30.094	375.52	46.132	Non
aPKC mut	h4c5	40.932	195.08	62.784	Non
aPKC mut	h4c5	40.993	262.441	62.883	Non
aPKC mut	h4c5	40.993	292.33	62.883	Non
aPKC mut	h4c5	40.811	323.814	62.595	Non
aPKC mut	h4c5	40.811	308.553	62.595	Non
aPKC mut	h4c5	42.628	308.327	65.359	Non
aPKC mut	h4c5	43.415	342.341	66.605	Non
aPKC mut	h4c5	42.386	374.018	65.017	Non
aPKC mut	h4c5	43.052	394.288	66.045	Non
aPKC mut	h4c5	43.294	393.468	66.404	Non
aPKC mut	h4c5	43.778	403.552	67.157	Non
aPKC mut	h4c5	43.778	383.332	67.157	Non
aPKC mut	h4c5	41.175	435.376	63.159	Non
aPKC mut	h4c5	39.176	476.13	60.091	Non
aPKC mut	h4c5	33.485	420.595	51.351	Non
aPKC mut	h4c5	33.485	424.007	51.351	Non
aPKC mut	h5c1	43.294	225.629	66.406	Non
aPKC mut	h5c1	42.991	310.792	65.949	Non
aPKC mut	h5c1	42.991	341.783	65.949	Non
aPKC mut	h5c1	42.991	352.531	65.942	Non
aPKC mut	h5c1	42.022	408.3	64.479	Non
aPKC mut	h5c1	41.901	465.689	64.275	Non
aPKC mut	h5c1	41.659	518.816	63.9	Non
aPKC mut	h5c1	41.841	565.526	64.178	Non
aPKC mut	h5c1	41.962	537.158	64.353	Non
aPKC mut	h5c1	41.841	530.556	64.188	Non
aPKC mut	h5c1	41.841	497.864	64.188	Non
aPKC mut	h5c1	41.901	493.648	64.259	Non
aPKC mut	h5c1	40.63	552.436	62.332	Non
aPKC mut	h5c1	39.721	549.875	60.919	Non
aPKC mut	h5c1	38.147	565.909	58.501	Non
aPKC mut	h5c1	37.663	552.107	57.769	Non
aPKC mut	h5c1	36.936	518.547	56.644	Non
aPKC mut	h5c1	33.121	578.433	50.784	Non
aPKC mut	h5c1	33.121	503.8	50.784	Non
aPKC mut	h5c2	36.452	352.267	55.901	Non
aPKC mut	h5c2	36.452	442.331	55.901	Non
aPKC mut	h5c2	36.452	490.686	55.901	Non
aPKC mut	h5c2	36.452	516.924	55.901	Non
aPKC mut	h5c2	36.452	523.464	55.901	Non
aPKC mut	h5c2	37.118	570.329	56.928	Non
aPKC mut	h5c2	37.481	720.638	57.485	Non
aPKC mut	h5c2	37.723	723.966	57.86	Non
aPKC mut	h5c2	37.844	708.329	58.039	Non
aPKC mut	h5c2	37.844	672.751	58.039	Non
aPKC mut	h5c2	37.602	662.649	57.674	Non
aPKC mut	h5c2	37.299	666.235	57.205	Non
aPKC mut	h5c2	37.299	683.056	57.205	Non
aPKC mut	h5c2	36.512	759.77	55.995	Non
aPKC mut	h5c2	32.092	688.421	49.208	Non
aPKC mut	h5c2	31.85	684.286	48.842	Non
aPKC mut	h5c2	27.853	645.307	42.689	Non
aPKC mut	h5c3	47.108	228.023	72.267	Non
aPKC mut	h5c3	47.108	312.509	72.267	Non
aPKC mut	h5c3	47.108	379.87	72.267	Non
aPKC mut	h5c3	47.108	398.217	72.267	Non
aPKC mut	h5c3	47.411	424.34	72.737	Non
aPKC mut	h5c3	47.108	469.608	72.261	Non
aPKC mut	h5c3	47.593	551.727	73.014	Non
aPKC mut	h5c3	47.956	613.316	73.59	Non
aPKC mut	h5c3	47.956	635.048	73.59	Non
aPKC mut	h5c3	47.956	627.598	73.59	Non
aPKC mut	h5c3	47.956	581.426	73.59	Non
aPKC mut	h5c3	45.353	584.911	69.571	Non
aPKC mut	h5c3	45.05	606.127	69.118	Non
aPKC mut	h5c3	44.384	548.007	68.09	Non
aPKC mut	h5c3	44.141	580.296	67.715	Non
aPKC mut	h5c3	44.202	556.424	67.801	Non
aPKC mut	h5c3	43.778	594.962	67.158	Non
aPKC mut	h5c3	44.141	565.197	67.715	Non
aPKC mut	h5c3	32.213	458.712	49.401	Non
aPKC mut	h5c4	42.628	441.296	65.381	Non
aPKC mut	h5c4	42.628	466.853	65.381	Non
aPKC mut	h5c4	42.567	517.453	65.307	Non
aPKC mut	h5c4	42.567	489.01	65.307	Non
aPKC mut	h5c4	43.778	506.003	67.161	Non
aPKC mut	h5c4	43.475	564.571	66.681	Non
aPKC mut	h5c4	43.778	497.951	67.156	Non
aPKC mut	h5c4	42.809	524.301	65.672	Non
aPKC mut	h5c4	42.204	591.307	64.74	Non
aPKC mut	h5c4	42.204	564.37	64.74	Non
aPKC mut	h5c4	42.204	522.247	64.74	Non
aPKC mut	h5c4	37.844	525.797	58.032	Non
aPKC mut	h5c4	37.844	532.051	58.032	Non
aPKC mut	h5c4	37.844	538.53	58.032	Non
aPKC mut	h5c4	37.844	500.232	58.032	Non
aPKC mut	h5c4	33.969	462.902	52.092	Non
aPKC mut	h7c5	48.562	357.445	74.499	Non
aPKC mut	h7c5	48.562	385.847	74.499	Non
aPKC mut	h7c5	48.562	393.288	74.499	Non
aPKC mut	h7c5	48.562	400.689	74.499	Non
aPKC mut	h7c5	48.562	412.61	74.499	Non
aPKC mut	h7c5	48.441	427.449	74.308	Non
aPKC mut	h7c5	48.441	407.618	74.308	Non
aPKC mut	h7c5	48.441	371.782	74.308	Non
aPKC mut	h7c5	48.501	455.07	74.401	Non
aPKC mut	h7c5	46.866	536.679	71.898	Non
aPKC mut	h7c5	46.866	529.465	71.898	Non
aPKC mut	h7c5	48.138	577.547	73.856	Non
aPKC mut	h7c5	48.138	558.847	73.856	Non
aPKC mut	h7c5	48.198	521.005	73.936	Non
aPKC mut	h8c2	36.573	271.694	56.078	Non
aPKC mut	h8c2	36.573	358.925	56.078	Non
aPKC mut	h8c2	36.573	397.971	56.078	Non
aPKC mut	h8c2	36.573	403.496	56.078	Non
aPKC mut	h8c2	36.573	396.059	56.078	Non
aPKC mut	h8c2	36.573	385.492	56.078	Non
aPKC mut	h8c2	36.754	499.352	56.362	Non
aPKC mut	h8c2	36.754	498.598	56.362	Non
aPKC mut	h8c2	37.178	557.466	57.017	Non
aPKC mut	h8c2	37.239	579.987	57.103	Non
aPKC mut	h8c2	37.299	607.43	57.201	Non
aPKC mut	h8c2	37.299	594.78	57.201	Non
aPKC mut	h8c2	34.514	672.2	52.929	Non
aPKC mut	h8c2	29.428	695.765	45.109	Non
aPKC mut	h8c2	26.461	728.712	40.557	Non
aPKC mut	h8c4	43.415	314.03	66.598	Non
aPKC mut	h8c4	43.657	390.898	66.977	Non
aPKC mut	h8c4	43.657	405.263	66.977	Non
aPKC mut	h8c4	42.143	443.712	64.625	Non
aPKC mut	h8c4	42.022	454.89	64.463	Non
aPKC mut	h8c4	41.598	465.849	63.802	Non
aPKC mut	h8c4	41.659	513.628	63.891	Non
aPKC mut	h8c4	41.659	509.36	63.891	Non
aPKC mut	h8c4	39.6	551.682	60.73	Non
aPKC mut	h8c4	42.325	523.661	64.928	Non
aPKC mut	h8c4	40.024	604.246	61.399	Non
aPKC mut	h8c4	39.479	533.615	60.547	Non
aPKC mut	h8c4	38.51	488.837	59.069	Non
aPKC mut	h8c4	34.817	518.443	53.382	Non
aPKC mut	h8c4	30.336	493.009	46.515	Non
aPKC mut	h11c1	41.719	288.802	63.999	Non
aPKC mut	h11c1	41.719	347.409	63.999	Non
aPKC mut	h11c1	41.719	388.594	63.999	Non
aPKC mut	h11c1	41.719	374.003	63.999	Non
aPKC mut	h11c1	41.538	382.864	63.71	Non
aPKC mut	h11c1	41.538	389.522	63.71	Non
aPKC mut	h11c1	41.538	395.661	63.71	Non
aPKC mut	h11c1	41.538	384.847	63.71	Non
aPKC mut	h11c1	41.659	461.223	63.899	Non
aPKC mut	h11c1	41.356	437.776	63.439	Non
aPKC mut	h11c1	41.356	450.659	63.439	Non
aPKC mut	h11c1	41.356	469.421	63.439	Non
aPKC mut	h11c1	41.356	471.954	63.439	Non
aPKC mut	h11c1	41.356	490.624	63.439	Non
aPKC mut	h11c1	41.356	516.132	63.439	Non
aPKC mut	h11c1	41.719	550.862	63.99	Non
aPKC mut	h11c1	41.719	537.718	63.99	Non
aPKC mut	h11c1	41.719	487.382	63.99	Non
aPKC mut	h11c1	41.719	463.124	63.99	Non
aPKC mut	h11c1	41.719	432.46	63.99	Non
aPKC mut	h11c1	41.175	381.432	63.161	Non
aPKC mut	h11c1	38.268	403.154	58.695	Non
aPKC mut	h11c1	38.268	405.848	58.695	Non
aPKC mut	h11c2	43.294	424.819	66.418	Non
aPKC mut	h11c2	43.294	453.328	66.418	Non
aPKC mut	h11c2	43.294	455.364	66.418	Non
aPKC mut	h11c2	43.294	443.826	66.418	Non
aPKC mut	h11c2	43.294	441.138	66.418	Non
aPKC mut	h11c2	43.536	455.709	66.783	Non
aPKC mut	h11c2	42.809	548.548	65.662	Non
aPKC mut	h11c2	42.809	579.041	65.662	Non
aPKC mut	h11c2	42.809	551.503	65.662	Non
aPKC mut	h11c2	42.809	534.495	65.662	Non
aPKC mut	h11c2	42.809	498.783	65.662	Non
aPKC mut	h11c2	43.173	502.792	66.229	Non
aPKC mut	h11c2	43.173	477.944	66.229	Non
aPKC mut	h11c2	43.657	478.085	66.968	Non
aPKC mut	h11c2	43.657	490.196	66.968	Non
aPKC mut	h11c2	43.657	509.568	66.968	Non
aPKC mut	h11c2	43.657	485.746	66.968	Non
aPKC mut	h11c2	43.657	448.955	66.968	Non
aPKC mut	h11c2	43.657	409.894	66.968	Non
aPKC mut	h11c2	44.141	398.727	67.724	Non
aPKC mut	h11c2	44.141	382.438	67.724	Non
aPKC mut	h11c3	43.052	351.285	66.042	Non
aPKC mut	h11c3	43.052	419.658	66.042	Non
aPKC mut	h11c3	43.052	437.702	66.042	Non
aPKC mut	h11c3	43.052	412.304	66.042	Non
aPKC mut	h11c3	43.052	381.422	66.042	Non
aPKC mut	h11c3	42.93	398.078	65.861	Non
aPKC mut	h11c3	42.93	376.921	65.861	Non
aPKC mut	h11c3	42.93	360.108	65.861	Non
aPKC mut	h11c3	42.93	350.759	65.861	Non
aPKC mut	h11c3	42.93	336.331	65.861	Non
aPKC mut	h11c3	42.93	327.993	65.861	Non
aPKC mut	h11c3	42.93	346.568	65.862	Non
aPKC mut	h11c3	42.93	342.291	65.862	Non
aPKC mut	h11c3	42.87	384.266	65.763	Non
aPKC mut	h11c3	42.87	388.296	65.763	Non
aPKC mut	h11c3	42.87	403.66	65.763	Non
aPKC mut	h11c3	42.87	405.915	65.763	Non
aPKC mut	h11c3	42.87	387.938	65.763	Non
aPKC mut	h11c3	42.87	364.302	65.763	Non
aPKC mut	h11c3	42.87	328.309	65.763	Non
aPKC mut	h11c3	37.844	343.052	58.063	Non
aPKC mut	h11c3	37.844	346.829	58.063	Non
aPKC mut	h11c4	55.041	160.712	84.47	Non
aPKC mut	h11c4	55.041	186.2	84.47	Non
aPKC mut	h11c4	55.041	203.195	84.47	Non
aPKC mut	h11c4	55.041	197.386	84.47	Non
aPKC mut	h11c4	55.041	190.423	84.47	Non
aPKC mut	h11c4	54.92	197.386	84.253	Non
aPKC mut	h11c4	54.92	196.917	84.253	Non
aPKC mut	h11c4	54.92	192.334	84.253	Non
aPKC mut	h11c4	54.92	196.825	84.253	Non
aPKC mut	h11c4	54.92	202.277	84.253	Non
aPKC mut	h11c4	54.92	211.061	84.253	Non
aPKC mut	h11c4	54.92	223.843	84.253	Non
aPKC mut	h11c4	53.224	234.047	81.662	Non
aPKC mut	h11c4	53.224	241.456	81.662	Non
aPKC mut	h11c4	53.224	246.518	81.662	Non
aPKC mut	h11c4	53.224	261.851	81.662	Non
aPKC mut	h11c4	53.224	278.973	81.662	Non
aPKC mut	h11c4	49.288	275.44	75.616	Non
aPKC mut	h11c4	49.288	285.091	75.616	Non
aPKC mut	h11c5	37.663	301.679	57.759	Non
aPKC mut	h11c5	37.663	330.821	57.759	Non
aPKC mut	h11c5	37.602	372.426	57.671	Non
aPKC mut	h11c5	37.602	364.54	57.671	Non
aPKC mut	h11c5	37.602	357.838	57.671	Non
aPKC mut	h11c5	37.602	345.867	57.671	Non
aPKC mut	h11c5	37.905	376.777	58.133	Non
aPKC mut	h11c5	37.905	355.3	58.133	Non
aPKC mut	h11c5	37.905	365.608	58.133	Non
aPKC mut	h11c5	38.329	420.805	58.783	Non
aPKC mut	h11c5	38.329	436.621	58.783	Non
aPKC mut	h11c5	38.329	438.712	58.783	Non
aPKC mut	h11c5	38.329	441.58	58.783	Non
aPKC mut	h11c5	38.329	445.5	58.783	Non
aPKC mut	h11c5	38.329	442.094	58.783	Non
aPKC mut	h11c5	38.329	432.044	58.783	Non
aPKC mut	h11c5	38.51	467.461	59.061	Non
aPKC mut	h11c5	38.51	465.778	59.061	Non
aPKC mut	h11c5	38.51	459.266	59.061	Non
aPKC mut	h11c5	38.51	439.654	59.061	Non
aPKC mut	h11c5	40.569	444.059	62.226	Non
aPKC mut	h11c5	40.569	413.822	62.226	Non
aPKC mut	h11c5	37.299	349.524	57.198	Non
aPKC mut	h11c5	37.299	321.915	57.198	Non
aPKC mut	h11c5	37.299	301.794	57.198	Non
aPKC mut	h11c5	37.299	285.006	57.198	Non
aPKC mut	h12c1	34.453	348.461	52.835	Non
aPKC mut	h12c1	34.453	471.185	52.835	Non
aPKC mut	h12c1	34.453	579.687	52.835	Non
aPKC mut	h12c1	34.877	619.228	53.48	Non
aPKC mut	h12c1	34.938	619.942	53.585	Non
aPKC mut	h12c1	34.938	622.316	53.585	Non
aPKC mut	h12c1	34.938	606.198	53.585	Non
aPKC mut	h12c1	34.817	652.42	53.401	Non
aPKC mut	h12c1	34.817	640.51	53.401	Non
aPKC mut	h12c1	34.817	619.501	53.401	Non
aPKC mut	h12c1	34.817	595.899	53.401	Non
aPKC mut	h12c1	34.635	691.82	53.107	Non
aPKC mut	h12c1	34.635	712.717	53.107	Non
aPKC mut	h12c1	34.635	703.406	53.107	Non
aPKC mut	h12c1	34.635	719.734	53.107	Non
aPKC mut	h12c1	34.635	736.361	53.107	Non
aPKC mut	h12c1	34.635	714.51	53.107	Non
aPKC mut	h12c1	34.635	700.361	53.107	Non
aPKC mut	h12c1	34.635	679.76	53.107	Non
aPKC mut	h12c1	34.635	675.757	53.107	Non
aPKC mut	h12c1	34.635	665.986	53.107	Non
aPKC mut	h12c1	33.485	759.888	51.337	Non
aPKC mut	h12c1	32.395	717.969	49.666	Non
aPKC mut	h12c1	32.395	676.04	49.666	Non
aPKC mut	h12c1	32.395	643.659	49.666	Non
aPKC mut	h12c1	30.699	599.311	47.065	Non
aPKC mut	h12c2	41.417	401.08	63.514	Non
aPKC mut	h12c2	41.417	511.71	63.514	Non
aPKC mut	h12c2	41.417	603.773	63.514	Non
aPKC mut	h12c2	41.417	637.973	63.514	Non
aPKC mut	h12c2	41.417	581.9	63.514	Non
aPKC mut	h12c2	41.719	624.181	64.011	Non
aPKC mut	h12c2	41.719	628.81	64.011	Non
aPKC mut	h12c2	41.719	648.119	64.011	Non
aPKC mut	h12c2	41.719	653.847	64.011	Non
aPKC mut	h12c2	41.719	653.465	64.011	Non
aPKC mut	h12c2	41.417	685.705	63.526	Non
aPKC mut	h12c2	41.417	668.918	63.526	Non
aPKC mut	h12c2	41.417	658.975	63.526	Non
aPKC mut	h12c2	41.719	678.218	63.984	Non
aPKC mut	h12c2	41.719	686.262	63.984	Non
aPKC mut	h12c2	41.719	692.869	63.984	Non
aPKC mut	h12c2	41.719	707.167	63.984	Non
aPKC mut	h12c2	41.719	722.656	63.984	Non
aPKC mut	h12c2	41.719	732.913	63.984	Non
aPKC mut	h12c2	41.719	735.39	63.984	Non
aPKC mut	h12c2	41.719	729.688	63.984	Non
aPKC mut	h12c2	37.844	760.948	58.041	Non
aPKC mut	h12c2	37.844	754.557	58.041	Non
aPKC mut	h12c2	36.088	711.493	55.347	Non
aPKC mut	h12c2	36.088	703.743	55.347	Non
aPKC mut	h12c2	36.088	670.209	55.347	Non
aPKC mut	h12c2	36.088	608.901	55.347	Non
aPKC mut	h12c3	37.905	399.569	58.136	Non
aPKC mut	h12c3	37.905	524.31	58.136	Non
aPKC mut	h12c3	37.905	622.995	58.136	Non
aPKC mut	h12c3	37.905	635.335	58.136	Non
aPKC mut	h12c3	37.905	553.248	58.136	Non
aPKC mut	h12c3	37.905	567.873	58.116	Non
aPKC mut	h12c3	37.905	574.185	58.116	Non
aPKC mut	h12c3	37.905	549.378	58.116	Non
aPKC mut	h12c3	37.905	580.818	58.116	Non
aPKC mut	h12c3	37.905	548.029	58.116	Non
aPKC mut	h12c3	37.299	713.328	57.222	Non
aPKC mut	h12c3	37.299	717.913	57.222	Non
aPKC mut	h12c3	37.299	726.358	57.222	Non
aPKC mut	h12c3	37.299	738.009	57.222	Non
aPKC mut	h12c3	37.299	718.313	57.222	Non
aPKC mut	h12c3	37.784	799.836	57.936	Non
aPKC mut	h12c3	37.784	819.623	57.936	Non
aPKC mut	h12c3	38.086	929.749	58.41	Non
aPKC mut	h12c3	38.086	974.886	58.41	Non
aPKC mut	h12c3	38.086	1012.168	58.41	Non
aPKC mut	h12c3	38.086	1023.197	58.41	Non
aPKC mut	h12c3	38.086	1015.583	58.41	Non
aPKC mut	h12c3	38.147	1022.085	58.52	Non
aPKC mut	h12c3	38.147	976.33	58.52	Non
aPKC mut	h12c3	38.147	924.227	58.52	Non
aPKC mut	h12c3	38.147	858.608	58.52	Non
aPKC mut	h12c3	38.268	822.068	58.696	Non
aPKC mut	h12c3	38.268	779.366	58.696	Non
aPKC mut	h12c4	45.776	599.483	70.222	Non
aPKC mut	h12c4	45.776	567.81	70.222	Non
aPKC mut	h12c4	45.776	493.834	70.222	Non
aPKC mut	h12c4	45.716	506.823	70.134	Non
aPKC mut	h12c4	45.595	524.252	69.936	Non
aPKC mut	h12c4	45.595	545.274	69.936	Non
aPKC mut	h12c4	45.897	590.984	70.407	Non
aPKC mut	h12c4	46.382	672.859	71.144	Non
aPKC mut	h12c4	46.382	663.336	71.144	Non
aPKC mut	h12c4	46.321	718.033	71.057	Non
aPKC mut	h12c4	46.321	720.711	71.057	Non
aPKC mut	h12c4	46.321	703.153	71.057	Non
aPKC mut	h12c4	46.382	737.56	71.152	Non
aPKC mut	h12c4	46.14	770.123	70.778	Non
aPKC mut	h12c4	46.14	790.343	70.778	Non
aPKC mut	h12c4	46.14	791.852	70.778	Non
aPKC mut	h12c4	46.14	773.914	70.778	Non
aPKC mut	h12c4	46.14	745.38	70.778	Non
aPKC mut	h12c4	46.14	678.909	70.778	Non
aPKC mut	h12c4	41.659	785.801	63.902	Non
aPKC mut	h12c4	41.659	713.867	63.902	Non
aPKC mut	h12c4	41.659	665.133	63.902	Non
aPKC mut	h12c5	43.96	310.195	67.428	Non
aPKC mut	h12c5	43.96	393.553	67.428	Non
aPKC mut	h12c5	43.96	403.453	67.428	Non
aPKC mut	h12c5	43.96	372.157	67.428	Non
aPKC mut	h12c5	44.263	445.755	67.905	Non
aPKC mut	h12c5	44.263	432.375	67.905	Non
aPKC mut	h12c5	44.263	410.843	67.905	Non
aPKC mut	h12c5	44.141	459.198	67.721	Non
aPKC mut	h12c5	44.141	458.826	67.721	Non
aPKC mut	h12c5	46.2	494.606	70.889	Non
aPKC mut	h12c5	46.2	491.273	70.889	Non
aPKC mut	h12c5	46.2	489.729	70.889	Non
aPKC mut	h12c5	46.2	475.275	70.889	Non
aPKC mut	h12c5	46.2	452.915	70.889	Non
aPKC mut	h12c5	45.897	445.342	70.401	Non
aPKC mut	h12c5	45.897	417.046	70.401	Non
aPKC mut	h12c5	47.714	462.857	73.209	Non
aPKC mut	h12c5	47.714	463.039	73.209	Non
aPKC mut	h12c5	47.108	479.766	72.264	Non
aPKC mut	h12c5	46.745	547.816	71.708	Non
aPKC mut	h12c5	46.624	555.208	71.519	Non
aPKC mut	h12c5	46.624	558.902	71.519	Non
aPKC mut	h12c5	46.624	551.229	71.519	Non
aPKC mut	h12c5	46.624	531.24	71.519	Non
aPKC mut	h12c5	46.624	529.531	71.519	Non
aPKC mut	h12c5	44.323	643.375	68.002	Non
aPKC mut	h12c5	44.323	616.071	68.002	Non
aPKC mut	h12c5	44.323	558.918	68.002	Non
aPKC mut	h12c6	36.149	365.744	55.434	Non
aPKC mut	h12c6	36.149	488.206	55.434	Non
aPKC mut	h12c6	36.149	601.384	55.434	Non
aPKC mut	h12c6	36.149	607.727	55.434	Non
aPKC mut	h12c6	36.149	626.981	55.434	Non
aPKC mut	h12c6	36.209	637.865	55.527	Non
aPKC mut	h12c6	36.209	658.024	55.527	Non
aPKC mut	h12c6	36.209	653.893	55.527	Non
aPKC mut	h12c6	37.602	653.617	57.658	Non
aPKC mut	h12c6	37.602	654.948	57.658	Non
aPKC mut	h12c6	37.481	708.969	57.482	Non
aPKC mut	h12c6	37.481	748.687	57.482	Non
aPKC mut	h12c6	37.481	762.322	57.482	Non
aPKC mut	h12c6	37.481	809.82	57.482	Non
aPKC mut	h12c6	38.813	811.965	59.527	Non
aPKC mut	h12c6	38.813	830.36	59.527	Non
aPKC mut	h12c6	38.813	848.346	59.527	Non
aPKC mut	h12c6	38.45	849.167	58.972	Non
aPKC mut	h12c6	38.45	804.078	58.972	Non
aPKC mut	h12c6	38.45	763.467	58.972	Non
aPKC mut	h12c6	34.332	713.67	52.645	Non
aPKC mut	h12c6	34.332	726.078	52.645	Non
aPKC mut	h12c6	34.332	703.787	52.645	Non
aPKC mut	h12c6	31.123	667.151	47.716	Non
aPKC mut	h12c6	31.123	675.798	47.716	Non
aPKC mut	h13c1	49.712	275.06	76.256	Non
aPKC mut	h13c1	49.712	352.074	76.256	Non
aPKC mut	h13c1	48.986	396.767	75.164	Non
aPKC mut	h13c1	48.986	426.603	75.164	Non
aPKC mut	h13c1	48.986	447.624	75.164	Non
aPKC mut	h13c1	48.986	445.966	75.164	Non
aPKC mut	h13c1	49.167	527.219	75.445	Non
aPKC mut	h13c1	49.167	527.436	75.445	Non
aPKC mut	h13c1	48.622	530.476	74.597	Non
aPKC mut	h13c1	48.622	550.135	74.597	Non
aPKC mut	h13c1	49.288	576.653	75.627	Non
aPKC mut	h13c1	49.288	599.404	75.627	Non
aPKC mut	h13c1	49.288	601.675	75.627	Non
aPKC mut	h13c1	49.288	588.2	75.627	Non
aPKC mut	h13c1	49.288	574.595	75.627	Non
aPKC mut	h13c1	49.107	596.092	75.337	Non
aPKC mut	h13c1	49.107	599.477	75.337	Non
aPKC mut	h13c1	48.259	649.507	74.042	Non
aPKC mut	h13c1	48.259	657.37	74.042	Non
aPKC mut	h13c1	48.259	618.013	74.042	Non
aPKC mut	h13c1	48.259	566.873	74.042	Non
aPKC mut	h13c1	44.989	575.713	69.021	Non
aPKC mut	h13c1	44.989	549.438	69.021	Non
aPKC mut	h13c1	44.989	515.161	69.021	Non
aPKC mut	h13c2	43.354	408.472	66.499	Non
aPKC mut	h13c2	43.354	488.995	66.499	Non
aPKC mut	h13c2	43.354	591.775	66.499	Non
aPKC mut	h13c2	43.112	650.334	66.149	Non
aPKC mut	h13c2	43.112	640.559	66.149	Non
aPKC mut	h13c2	43.112	602.152	66.149	Non
aPKC mut	h13c2	42.991	629.665	65.951	Non
aPKC mut	h13c2	42.991	616.847	65.951	Non
aPKC mut	h13c2	42.991	618.933	65.951	Non
aPKC mut	h13c2	42.991	618.455	65.951	Non
aPKC mut	h13c2	44.747	628.703	68.65	Non
aPKC mut	h13c2	44.747	632.912	68.65	Non
aPKC mut	h13c2	44.747	640.263	68.65	Non
aPKC mut	h13c2	44.808	676.647	68.738	Non
aPKC mut	h13c2	44.808	673.728	68.738	Non
aPKC mut	h13c2	44.808	660.67	68.738	Non
aPKC mut	h13c2	44.081	702.896	67.616	Non
aPKC mut	h13c2	44.081	667.933	67.616	Non
aPKC mut	h13c2	44.081	625.898	67.616	Non
aPKC mut	h13c2	44.081	596.979	67.616	Non
aPKC mut	h13c2	47.653	745.402	73.11	Non
aPKC mut	h13c2	47.653	728.542	73.11	Non
aPKC mut	h13c2	46.685	760.671	71.616	Non
aPKC mut	h13c2	46.685	731.963	71.616	Non
aPKC mut	h13c2	46.685	720.421	71.616	Non
aPKC mut	h13c2	46.685	681.862	71.616	Non
aPKC mut	h13c2	46.987	660.164	72.088	Non
aPKC mut	h13c2	36.27	735.354	55.616	Non
aPKC mut	h13c2	36.27	720.697	55.616	Non
aPKC mut	h13c3	32.092	388.732	49.207	Non
aPKC mut	h13c3	32.092	528.16	49.207	Non
aPKC mut	h13c3	32.092	579.571	49.207	Non
aPKC mut	h13c3	32.092	633.009	49.207	Non
aPKC mut	h13c3	31.607	681.042	48.464	Non
aPKC mut	h13c3	31.607	709.058	48.464	Non
aPKC mut	h13c3	31.607	711.818	48.464	Non
aPKC mut	h13c3	31.607	685.153	48.464	Non
aPKC mut	h13c3	32.092	652.999	49.206	Non
aPKC mut	h13c3	32.092	631.881	49.206	Non
aPKC mut	h13c3	31.91	730.533	48.94	Non
aPKC mut	h13c3	31.91	730.204	48.94	Non
aPKC mut	h13c3	31.91	680.544	48.94	Non
aPKC mut	h13c3	33.787	703.09	51.818	Non
aPKC mut	h13c3	33.787	717.364	51.818	Non
aPKC mut	h13c3	33.606	771.597	51.548	Non
aPKC mut	h13c3	33.606	755.222	51.548	Non
aPKC mut	h13c3	33.606	714.297	51.548	Non
aPKC mut	h13c3	34.453	780.634	52.836	Non
aPKC mut	h13c3	34.453	771.6	52.836	Non
aPKC mut	h13c3	34.453	727.421	52.836	Non
aPKC mut	h13c3	34.453	688.157	52.836	Non
aPKC mut	h13c3	31.486	891.673	48.283	Non
aPKC mut	h13c3	31.486	841.769	48.283	Non
aPKC mut	h13c3	31.486	815.169	48.283	Non
aPKC mut	h13c3	31.486	786.066	48.283	Non
aPKC mut	h13c3	31.486	699.081	48.283	Non
aPKC mut	h13c3	29.549	693.328	45.307	Non
aPKC mut	h13c4	49.531	296.999	75.998	Non
aPKC mut	h13c4	49.531	408.333	75.998	Non
aPKC mut	h13c4	49.531	444.796	75.998	Non
aPKC mut	h13c4	49.531	497.92	75.998	Non
aPKC mut	h13c4	49.833	520.145	76.45	Non
aPKC mut	h13c4	49.833	513.399	76.45	Non
aPKC mut	h13c4	49.773	492.544	76.37	Non
aPKC mut	h13c4	49.107	475.072	75.338	Non
aPKC mut	h13c4	49.107	463.159	75.338	Non
aPKC mut	h13c4	49.107	467.048	75.338	Non
aPKC mut	h13c4	47.775	555.678	73.292	Non
aPKC mut	h13c4	47.775	569.846	73.292	Non
aPKC mut	h13c4	47.775	556.378	73.292	Non
aPKC mut	h13c4	47.775	555.623	73.292	Non
aPKC mut	h13c4	48.38	683.004	74.219	Non
aPKC mut	h13c4	48.38	690.741	74.219	Non
aPKC mut	h13c4	48.38	680.677	74.219	Non
aPKC mut	h13c4	46.564	678.185	71.437	Non
aPKC mut	h13c4	46.564	708.924	71.437	Non
aPKC mut	h13c4	46.564	691.792	71.437	Non
aPKC mut	h13c4	46.564	668.391	71.437	Non
aPKC mut	h13c4	45.837	784.04	70.313	Non
aPKC mut	h13c4	45.837	787.16	70.313	Non
aPKC mut	h13c4	45.837	737.64	70.313	Non
aPKC mut	h13c4	44.384	812.738	68.081	Non
aPKC mut	h13c4	44.384	825.387	68.081	Non
aPKC mut	h13c4	44.384	766.517	68.081	Non
aPKC mut	h13c4	44.384	715.352	68.081	Non
aPKC mut	h13c4	44.384	677.713	68.081	Non
aPKC mut	h13c4	44.384	634.638	68.081	Non
aPKC mut	h13c5	44.263	349.898	67.894	Non
aPKC mut	h13c5	44.263	394.822	67.894	Non
aPKC mut	h13c5	44.263	502.272	67.894	Non
aPKC mut	h13c5	44.263	546.7	67.894	Non
aPKC mut	h13c5	44.263	549.134	67.894	Non
aPKC mut	h13c5	44.263	531.901	67.894	Non
aPKC mut	h13c5	44.323	519.177	67.991	Non
aPKC mut	h13c5	44.323	490.203	67.991	Non
aPKC mut	h13c5	44.323	472.474	67.991	Non
aPKC mut	h13c5	44.323	453.735	67.991	Non
aPKC mut	h13c5	45.05	477.842	69.108	Non
aPKC mut	h13c5	44.686	554.527	68.561	Non
aPKC mut	h13c5	44.686	514.82	68.561	Non
aPKC mut	h13c5	44.686	503.894	68.561	Non
aPKC mut	h13c5	45.292	670.166	69.482	Non
aPKC mut	h13c5	45.292	666.558	69.482	Non
aPKC mut	h13c5	45.292	632.75	69.482	Non
aPKC mut	h13c5	44.444	643.062	68.177	Non
aPKC mut	h13c5	44.444	686.623	68.177	Non
aPKC mut	h13c5	44.444	657.176	68.177	Non
aPKC mut	h13c5	44.202	632.217	67.809	Non
aPKC mut	h13c5	27.49	675.455	42.133	Non
aPKC mut	h13c5	27.49	626.333	42.133	Non
aPKC mut	h13c6	50.015	254.841	76.726	Non
aPKC mut	h13c6	50.015	305.697	76.726	Non
aPKC mut	h13c6	50.015	403.39	76.726	Non
aPKC mut	h13c6	50.015	458.051	76.726	Non
aPKC mut	h13c6	50.136	532.175	76.927	Non
aPKC mut	h13c6	50.136	527.735	76.927	Non
aPKC mut	h13c6	50.136	520.348	76.927	Non
aPKC mut	h13c6	50.136	519.264	76.927	Non
aPKC mut	h13c6	50.136	528.238	76.927	Non
aPKC mut	h13c6	50.136	550.075	76.927	Non
aPKC mut	h13c6	50.136	549.008	76.927	Non
aPKC mut	h13c6	50.378	607.892	77.293	Non
aPKC mut	h13c6	50.378	632.635	77.293	Non
aPKC mut	h13c6	50.378	626.439	77.293	Non
aPKC mut	h13c6	50.378	649.338	77.293	Non
aPKC mut	h13c6	50.378	653.882	77.293	Non
aPKC mut	h13c6	50.378	679.75	77.293	Non
aPKC mut	h13c6	49.409	721.744	75.8	Non
aPKC mut	h13c6	49.409	713.537	75.8	Non
aPKC mut	h13c6	49.409	753.264	75.8	Non
aPKC mut	h13c6	49.409	745.09	75.8	Non
aPKC mut	h13c6	49.409	708.238	75.8	Non
aPKC mut	h13c6	49.409	673.572	75.8	Non
aPKC mut	h13c6	49.409	605.707	75.8	Non
aPKC mut	h13c6	49.409	520.105	75.8	Non
aPKC mut	h14c1	42.325	249.114	64.922	Non
aPKC mut	h14c1	42.325	309.291	64.922	Non
aPKC mut	h14c1	42.325	305.251	64.922	Non
aPKC mut	h14c1	45.474	257.868	69.744	Non
aPKC mut	h14c1	45.474	227.122	69.744	Non
aPKC mut	h14c1	45.474	222.729	69.737	Non
aPKC mut	h14c1	45.474	201.895	69.737	Non
aPKC mut	h14c1	45.05	220.362	69.104	Non
aPKC mut	h14c1	45.05	219.015	69.104	Non
aPKC mut	h14c1	45.353	229.025	69.578	Non
aPKC mut	h14c1	45.353	222.934	69.578	Non
aPKC mut	h14c1	45.655	246.428	70.042	Non
aPKC mut	h14c1	45.655	253.628	70.042	Non
aPKC mut	h14c1	45.655	257.378	70.042	Non
aPKC mut	h14c1	45.655	251.495	70.042	Non
aPKC mut	h14c1	44.989	259.756	69.013	Non
aPKC mut	h14c1	44.989	266.816	69.013	Non
aPKC mut	h14c1	44.989	270.369	69.013	Non
aPKC mut	h14c1	44.989	267.613	69.013	Non
aPKC mut	h14c1	41.78	284.459	64.09	Non
aPKC mut	h14c1	41.78	298.333	64.09	Non
aPKC mut	h14c2	60.066	169.234	92.167	Non
aPKC mut	h14c2	60.066	216.453	92.167	Non
aPKC mut	h14c2	60.127	251.891	92.266	Non
aPKC mut	h14c2	60.127	245.268	92.266	Non
aPKC mut	h14c2	60.127	229.945	92.266	Non
aPKC mut	h14c2	60.127	223.471	92.266	Non
aPKC mut	h14c2	60.127	223.254	92.266	Non
aPKC mut	h14c2	58.068	278.245	89.111	Non
aPKC mut	h14c2	58.068	275.062	89.111	Non
aPKC mut	h14c2	58.068	263.699	89.111	Non
aPKC mut	h14c2	59.098	259.057	90.683	Non
aPKC mut	h14c2	59.098	270.611	90.683	Non
aPKC mut	h14c2	59.098	278.13	90.683	Non
aPKC mut	h14c2	55.888	348.831	85.747	Non
aPKC mut	h14c2	55.888	347.043	85.747	Non
aPKC mut	h14c2	55.888	336.294	85.747	Non
aPKC mut	h14c2	55.888	317.68	85.747	Non
aPKC mut	h14c3	37.36	365.36	57.29	Non
aPKC mut	h14c3	37.36	368.991	57.29	Non
aPKC mut	h14c3	37.36	339.778	57.29	Non
aPKC mut	h14c3	40.508	343.428	62.135	Non
aPKC mut	h14c3	40.508	330.69	62.135	Non
aPKC mut	h14c3	40.508	315.165	62.135	Non
aPKC mut	h14c3	40.508	295.262	62.135	Non
aPKC mut	h14c3	40.508	296.323	62.141	Non
aPKC mut	h14c3	40.508	296.273	62.141	Non
aPKC mut	h14c3	40.508	295.429	62.141	Non
aPKC mut	h14c3	40.508	287.971	62.141	Non
aPKC mut	h14c3	41.296	332.041	63.328	Non
aPKC mut	h14c3	41.296	329.205	63.328	Non
aPKC mut	h14c3	42.022	365.354	64.462	Non
aPKC mut	h14c3	42.022	363.977	64.462	Non
aPKC mut	h14c3	42.022	369.102	64.462	Non
aPKC mut	h14c3	42.143	443.271	64.65	Non
aPKC mut	h14c3	42.143	427.693	64.65	Non
aPKC mut	h14c3	42.143	404.967	64.65	Non
aPKC mut	h14c3	42.143	357.127	64.65	Non
aPKC mut	h14c3	40.024	351.602	61.389	Non
aPKC mut	h14c3	40.024	331.038	61.389	Non
aPKC mut	h14c3	40.024	302.505	61.389	Non
aPKC mut	h14c4	37.178	244.863	57.016	Non
aPKC mut	h14c4	37.178	294.959	57.016	Non
aPKC mut	h14c4	37.541	332.068	57.585	Non
aPKC mut	h14c4	37.541	316.693	57.585	Non
aPKC mut	h14c4	37.541	302.569	57.585	Non
aPKC mut	h14c4	38.45	315.869	58.964	Non
aPKC mut	h14c4	38.45	299.925	58.964	Non
aPKC mut	h14c4	38.45	278.096	58.964	Non
aPKC mut	h14c4	38.45	282.012	58.964	Non
aPKC mut	h14c4	38.45	291.533	58.964	Non
aPKC mut	h14c4	38.45	298.215	58.964	Non
aPKC mut	h14c4	38.45	312.561	58.964	Non
aPKC mut	h14c4	38.45	339.958	58.964	Non
aPKC mut	h14c4	38.45	340.608	58.964	Non
aPKC mut	h14c4	38.45	343.033	58.964	Non
aPKC mut	h14c4	38.45	313.974	58.964	Non
aPKC mut	h14c4	38.45	301.775	58.964	Non
aPKC mut	h14c4	38.45	286.173	58.964	Non
aPKC mut	h14c4	34.151	334.063	52.359	Non
aPKC mut	h14c4	34.151	316.476	52.359	Non
aPKC mut	h14c5	34.211	257.087	52.462	Non
aPKC mut	h14c5	34.211	312.772	52.462	Non
aPKC mut	h14c5	34.211	299.19	52.46	Non
aPKC mut	h14c5	34.211	277.965	52.46	Non
aPKC mut	h14c5	34.211	258.02	52.46	Non
aPKC mut	h14c5	34.211	229.041	52.46	Non
aPKC mut	h14c5	33.363	245.742	51.15	Non
aPKC mut	h14c5	33.363	229.479	51.15	Non
aPKC mut	h14c5	33.363	232.719	51.15	Non
aPKC mut	h14c5	33.363	220.403	51.15	Non
aPKC mut	h14c5	33.242	224.068	50.979	Non
aPKC mut	h14c5	33.242	215.776	50.979	Non
aPKC mut	h14c5	33.242	203.898	50.979	Non
aPKC mut	h14c5	32.94	225.533	50.511	Non
aPKC mut	h14c5	32.94	232.939	50.511	Non
aPKC mut	h14c5	32.94	241.935	50.511	Non
aPKC mut	h14c5	32.94	259.599	50.511	Non
aPKC mut	h14c5	32.94	270.453	50.511	Non
aPKC mut	h14c5	32.94	270.176	50.511	Non
aPKC mut	h14c5	32.94	272.293	50.511	Non
aPKC mut	h14c5	32.94	280.664	50.511	Non
aPKC mut	h14c5	32.94	285.65	50.511	Non
aPKC mut	h14c5	28.701	352.142	43.981	Non
aPKC mut	h14c5	28.701	360.625	43.981	Non
aPKC mut	h14c5	28.701	338.174	43.981	Non
aPKC mut	h14c5	28.701	325.062	43.981	Non
aPKC mut	h14c5	28.701	290.634	43.981	Non
aPKC mut	h15c1	40.024	164.678	61.404	Non
aPKC mut	h15c1	40.024	229.364	61.404	Non
aPKC mut	h15c1	40.024	276.567	61.404	Non
aPKC mut	h15c1	40.085	334.749	61.49	Non
aPKC mut	h15c1	40.206	316.013	61.655	Non
aPKC mut	h15c1	40.206	306.009	61.655	Non
aPKC mut	h15c1	41.598	369.894	63.806	Non
aPKC mut	h15c1	41.598	376.74	63.806	Non
aPKC mut	h15c1	41.598	385.785	63.806	Non
aPKC mut	h15c1	41.598	366.142	63.806	Non
aPKC mut	h15c1	41.598	335.001	63.806	Non
aPKC mut	h15c1	43.96	415.477	67.438	Non
aPKC mut	h15c1	43.96	404.604	67.438	Non
aPKC mut	h15c1	43.96	447.363	67.43	Non
aPKC mut	h15c1	43.96	439.48	67.43	Non
aPKC mut	h15c1	43.96	415.565	67.43	Non
aPKC mut	h15c1	43.96	405.648	67.43	Non
aPKC mut	h15c1	43.96	363.665	67.43	Non
aPKC mut	h15c1	43.96	336.921	67.43	Non
aPKC mut	h15c1	42.567	353.035	65.291	Non
aPKC mut	h15c1	42.567	343.164	65.291	Non
aPKC mut	h15c1	42.567	323.718	65.291	Non
aPKC mut	h15c2	47.411	195.014	72.744	Non
aPKC mut	h15c2	47.411	259.007	72.744	Non
aPKC mut	h15c2	47.411	299.504	72.744	Non
aPKC mut	h15c2	47.411	310.179	72.744	Non
aPKC mut	h15c2	47.411	323.274	72.744	Non
aPKC mut	h15c2	47.108	346.793	72.257	Non
aPKC mut	h15c2	47.653	381.012	73.11	Non
aPKC mut	h15c2	47.653	384.662	73.11	Non
aPKC mut	h15c2	47.653	382.25	73.11	Non
aPKC mut	h15c2	48.138	434.032	73.846	Non
aPKC mut	h15c2	48.138	416.324	73.846	Non
aPKC mut	h15c2	48.138	382.021	73.846	Non
aPKC mut	h15c2	49.167	402.603	75.435	Non
aPKC mut	h15c2	49.167	396.873	75.435	Non
aPKC mut	h15c2	49.167	377.478	75.435	Non
aPKC mut	h15c2	49.167	367.659	75.435	Non
aPKC mut	h15c2	45.534	373.589	69.859	Non
aPKC mut	h15c2	45.534	382.506	69.859	Non
aPKC mut	h15c3	44.263	141.342	67.895	Non
aPKC mut	h15c3	44.263	174.425	67.895	Non
aPKC mut	h15c3	44.081	210.002	67.623	Non
aPKC mut	h15c3	44.081	229.375	67.623	Non
aPKC mut	h15c3	44.081	234.877	67.623	Non
aPKC mut	h15c3	44.081	242.458	67.623	Non
aPKC mut	h15c3	41.719	282.573	63.997	Non
aPKC mut	h15c3	41.719	271.518	63.997	Non
aPKC mut	h15c3	41.719	279.301	63.997	Non
aPKC mut	h15c3	41.719	277.938	63.997	Non
aPKC mut	h15c3	41.719	268.349	63.997	Non
aPKC mut	h15c3	41.719	257.632	63.997	Non
aPKC mut	h15c3	43.173	306.078	66.206	Non
aPKC mut	h15c3	43.173	320.876	66.206	Non
aPKC mut	h15c3	43.173	314.796	66.206	Non
aPKC mut	h15c3	43.173	316.041	66.206	Non
aPKC mut	h15c3	43.173	305.426	66.206	Non
aPKC mut	h15c4	58.129	199.238	89.191	Non
aPKC mut	h15c4	58.129	268.513	89.191	Non
aPKC mut	h15c4	58.129	296.888	89.191	Non
aPKC mut	h15c4	58.129	296.888	89.191	Non
aPKC mut	h15c4	57.705	344.577	88.556	Non
aPKC mut	h15c4	57.705	321.511	88.556	Non
aPKC mut	h15c4	57.644	317.546	88.449	Non
aPKC mut	h15c4	57.644	359.269	88.459	Non
aPKC mut	h15c4	57.644	364.062	88.459	Non
aPKC mut	h15c4	57.644	365.018	88.459	Non
aPKC mut	h15c4	57.644	368.04	88.459	Non
aPKC mut	h15c4	57.644	375.595	88.459	Non
aPKC mut	h15c4	60.309	369.086	92.545	Non
aPKC mut	h15c4	60.309	386.661	92.545	Non
aPKC mut	h15c4	60.309	379.545	92.545	Non
aPKC mut	h15c4	60.309	386.575	92.545	Non
aPKC mut	h15c4	54.314	468.501	83.345	Non
aPKC mut	h15c4	54.314	437.129	83.345	Non
aPKC mut	h15c4	51.044	397.488	78.323	Non
aPKC mut	h15c4	51.044	406.484	78.323	Non
aPKC mut	h15c4	51.044	397.856	78.323	Non
aPKC mut	h15c4	52.982	451.077	81.299	Non
aPKC mut	h15c4	52.982	479.788	81.299	Non
aPKC mut	h15c4	52.982	472.262	81.299	Non
aPKC mut	h15c5	53.648	168.55	82.31	Non
aPKC mut	h15c5	53.648	240.244	82.31	Non
aPKC mut	h15c5	53.648	277.228	82.31	Non
aPKC mut	h15c5	53.648	303.296	82.31	Non
aPKC mut	h15c5	53.769	358.684	82.517	Non
aPKC mut	h15c5	53.769	353.982	82.517	Non
aPKC mut	h15c5	53.769	354.306	82.484	Non
aPKC mut	h15c5	53.769	339.242	82.484	Non
aPKC mut	h15c5	53.769	340.116	82.484	Non
aPKC mut	h15c5	53.709	394.108	82.414	Non
aPKC mut	h15c5	53.648	403.988	82.319	Non
aPKC mut	h15c5	53.648	409.583	82.319	Non
aPKC mut	h15c5	53.648	407.046	82.319	Non
aPKC mut	h15c5	53.648	438.835	82.319	Non
aPKC mut	h15c5	52.982	496.76	81.297	Non
aPKC mut	h15c5	52.982	517.147	81.297	Non
aPKC mut	h15c5	52.982	504.96	81.297	Non
aPKC mut	h15c5	52.982	508.077	81.299	Non
aPKC mut	h15c5	52.982	436.726	81.299	Non
aPKC mut	h15c5	52.498	428.98	80.568	Non
aPKC mut	h15c5	52.498	436.606	80.568	Non
aPKC mut	h15c5	52.498	398.565	80.568	Non
aPKC mut	h17c1	42.567	181.956	65.295	Non
aPKC mut	h17c1	42.567	243.678	65.295	Non
aPKC mut	h17c1	42.567	286.225	65.295	Non
aPKC mut	h17c1	42.749	316.745	65.571	Non
aPKC mut	h17c1	43.052	317.197	66.04	Non
aPKC mut	h17c1	43.052	321.347	66.04	Non
aPKC mut	h17c1	42.507	393.932	65.206	Non
aPKC mut	h17c1	43.839	428.106	67.232	Non
aPKC mut	h17c1	42.567	435.695	65.295	Non
aPKC mut	h17c1	41.417	495.208	63.52	Non
aPKC mut	h17c1	42.204	461.107	64.739	Non
aPKC mut	h17c1	43.354	476.449	66.505	Non
aPKC mut	h17c1	43.354	457.906	66.505	Non
aPKC mut	h17c1	43.354	435.032	66.505	Non
aPKC mut	h17c1	43.354	406.23	66.505	Non
aPKC mut	h17c1	43.718	434.01	67.056	Non
aPKC mut	h17c1	43.718	410.409	67.056	Non
aPKC mut	h17c1	43.718	402.848	67.056	Non
aPKC mut	h17c1	43.718	382.433	67.056	Non
aPKC mut	h17c2	40.387	188.957	61.938	Non
aPKC mut	h17c2	40.387	225.691	61.938	Non
aPKC mut	h17c2	40.387	261.028	61.938	Non
aPKC mut	h17c2	40.327	287.931	61.857	Non
aPKC mut	h17c2	40.327	313.71	61.857	Non
aPKC mut	h17c2	41.962	348.384	64.365	Non
aPKC mut	h17c2	38.995	410.21	59.794	Non
aPKC mut	h17c2	38.995	455.126	59.794	Non
aPKC mut	h17c2	38.995	455.126	59.794	Non
aPKC mut	h17c2	38.995	493.546	59.794	Non
aPKC mut	h17c2	38.995	516.709	59.794	Non
aPKC mut	h17c2	39.176	499.135	60.096	Non
aPKC mut	h17c2	39.782	530.916	61.013	Non
aPKC mut	h17c2	40.327	519.11	61.849	Non
aPKC mut	h17c2	40.327	488.999	61.849	Non
aPKC mut	h17c2	40.327	456.181	61.849	Non
aPKC mut	h17c2	40.327	443.724	61.849	Non
aPKC mut	h17c3	48.441	126.87	74.331	Non
aPKC mut	h17c3	48.441	167.801	74.331	Non
aPKC mut	h17c3	48.441	206.896	74.331	Non
aPKC mut	h17c3	48.441	235.306	74.331	Non
aPKC mut	h17c3	48.441	249.532	74.331	Non
aPKC mut	h17c3	48.804	268.313	74.889	Non
aPKC mut	h17c3	48.804	290.475	74.889	Non
aPKC mut	h17c3	48.804	301.865	74.889	Non
aPKC mut	h17c3	49.409	326.96	75.807	Non
aPKC mut	h17c3	49.591	354.546	76.086	Non
aPKC mut	h17c3	49.591	355.079	76.086	Non
aPKC mut	h17c3	49.591	346.157	76.086	Non
aPKC mut	h17c3	49.591	336.084	76.086	Non
aPKC mut	h17c3	49.591	324.755	76.086	Non
aPKC mut	h17c3	50.742	381.138	77.855	Non
aPKC mut	h17c3	50.742	371.537	77.855	Non
aPKC mut	h17c3	50.742	354.721	77.855	Non
aPKC mut	h17c4	39.54	124.003	60.65	Non
aPKC mut	h17c4	39.54	154.16	60.65	Non
aPKC mut	h17c4	39.54	175.34	60.65	Non
aPKC mut	h17c4	39.54	197.893	60.65	Non
aPKC mut	h17c4	39.54	211.237	60.65	Non
aPKC mut	h17c4	39.358	245.752	60.363	Non
aPKC mut	h17c4	39.358	279.175	60.363	Non
aPKC mut	h17c4	40.327	291.068	61.864	Non
aPKC mut	h17c4	40.327	305.178	61.864	Non
aPKC mut	h17c4	40.327	322.64	61.864	Non
aPKC mut	h17c4	40.327	324.434	61.864	Non
aPKC mut	h17c4	40.872	322.508	62.694	Non
aPKC mut	h17c4	40.872	303.233	62.694	Non
aPKC mut	h17c4	40.872	276.442	62.694	Non
aPKC mut	h17c5	48.441	115.565	74.319	Non
aPKC mut	h17c5	48.441	155.888	74.319	Non
aPKC mut	h17c5	48.441	189.674	74.319	Non
aPKC mut	h17c5	48.441	209.898	74.319	Non
aPKC mut	h17c5	48.441	220.471	74.319	Non
aPKC mut	h17c5	48.441	233.727	74.319	Non
aPKC mut	h17c5	48.441	248.152	74.319	Non
aPKC mut	h17c5	48.441	257.968	74.319	Non
aPKC mut	h17c5	48.441	268.265	74.319	Non
aPKC mut	h17c5	50.984	278.763	78.229	Non
aPKC mut	h17c5	50.984	296.296	78.229	Non
aPKC mut	h17c5	50.984	299.821	78.229	Non
aPKC mut	h17c5	50.984	293.887	78.229	Non
aPKC mut	h17c5	50.681	300.966	77.748	Non
aPKC mut	h17c5	50.681	288.268	77.748	Non
aPKC mut	h17c5	40.508	310.565	62.129	Non
aPKC mut	h17c5	40.508	306.888	62.129	Non
aPKC mut	h16c1	42.386	285.922	65.022	Non
aPKC mut	h16c1	42.143	430.861	64.643	Non
aPKC mut	h16c1	42.143	500.21	64.643	Non
aPKC mut	h16c1	42.143	514.466	64.643	Non
aPKC mut	h16c1	41.901	580.276	64.259	Non
aPKC mut	h16c1	41.901	593.299	64.259	Non
aPKC mut	h16c1	41.901	621.038	64.259	Non
aPKC mut	h16c1	41.901	647.056	64.259	Non
aPKC mut	h16c1	41.841	714.608	64.169	Non
aPKC mut	h16c1	41.841	730.974	64.169	Non
aPKC mut	h16c1	41.841	707.94	64.169	Non
aPKC mut	h16c1	41.296	647.964	63.349	Non
aPKC mut	h16c1	41.296	591.398	63.349	Non
aPKC mut	h16c2	46.927	221.822	71.99	Non
aPKC mut	h16c2	47.593	360.544	73.016	Non
aPKC mut	h16c2	47.593	464.243	73.016	Non
aPKC mut	h16c2	47.653	509.15	73.108	Non
aPKC mut	h16c2	47.653	544.323	73.112	Non
aPKC mut	h16c2	47.653	554.465	73.112	Non
aPKC mut	h16c2	47.653	573.37	73.113	Non
aPKC mut	h16c2	47.896	622.623	73.488	Non
aPKC mut	h16c2	47.351	658.02	72.65	Non
aPKC mut	h16c2	47.351	674.96	72.65	Non
aPKC mut	h16c2	45.231	690.336	69.388	Non
aPKC mut	h16c2	46.019	689.322	70.594	Non
aPKC mut	h16c2	46.019	650.365	70.594	Non
aPKC mut	h16c2	46.019	585.869	70.594	Non
aPKC mut	h16c2	46.14	550.557	70.786	Non
aPKC mut	h16c2	46.14	499.552	70.786	Non
aPKC mut	h16c2	46.14	459.398	70.786	Non
aPKC mut	h16c3	49.167	239.495	75.448	Non
aPKC mut	h16c3	49.167	374.22	75.448	Non
aPKC mut	h16c3	48.925	543.04	75.062	Non
aPKC mut	h16c3	48.925	590.93	75.062	Non
aPKC mut	h16c3	48.32	647.63	74.128	Non
aPKC mut	h16c3	48.198	718.129	73.934	Non
aPKC mut	h16c3	48.198	750.259	73.934	Non
aPKC mut	h16c3	48.198	735.721	73.934	Non
aPKC mut	h16c3	48.198	730.88	73.934	Non
aPKC mut	h16c3	48.198	713.283	73.934	Non
aPKC mut	h16c3	48.198	713.096	73.934	Non
aPKC mut	h16c3	48.077	747.901	73.758	Non
aPKC mut	h16c3	48.077	729.743	73.758	Non
aPKC mut	h16c3	48.077	698.281	73.758	Non
aPKC mut	h16c3	48.077	623.747	73.758	Non
aPKC mut	h16c4	50.015	293.599	76.739	Non
aPKC mut	h16c4	50.015	408.939	76.739	Non
aPKC mut	h16c4	50.015	444.745	76.739	Non
aPKC mut	h16c4	50.015	462.491	76.739	Non
aPKC mut	h16c4	49.894	567.484	76.553	Non
aPKC mut	h16c4	49.894	567.484	76.553	Non
aPKC mut	h16c4	49.894	554.91	76.553	Non
aPKC mut	h16c4	49.894	561.694	76.553	Non
aPKC mut	h16c4	48.622	660.17	74.593	Non
aPKC mut	h16c4	48.743	695.058	74.78	Non
aPKC mut	h16c4	48.743	705.537	74.78	Non
aPKC mut	h16c4	48.743	726.958	74.78	Non
aPKC mut	h16c4	48.743	757.552	74.78	Non
aPKC mut	h16c4	48.743	759.264	74.78	Non
aPKC mut	h16c4	48.743	765.458	74.78	Non
aPKC mut	h16c4	48.743	758.04	74.78	Non
aPKC mut	h16c4	48.743	691.83	74.78	Non
aPKC mut	h16c5	47.896	344.966	73.493	Non
aPKC mut	h16c5	47.896	511.211	73.493	Non
aPKC mut	h16c5	47.896	574.782	73.493	Non
aPKC mut	h16c5	47.896	577.147	73.493	Non
aPKC mut	h16c5	47.896	546.609	73.493	Non
aPKC mut	h16c5	48.017	526.526	73.661	Non
aPKC mut	h16c5	47.896	611.7	73.491	Non
aPKC mut	h16c5	48.138	672.329	73.847	Non
aPKC mut	h16c5	48.198	720.832	73.95	Non
aPKC mut	h16c5	48.198	799.353	73.95	Non
aPKC mut	h16c5	48.198	822.094	73.95	Non
aPKC mut	h16c5	47.048	829.591	72.171	Non
aPKC mut	h16c5	47.048	765.827	72.171	Non
aPKC mut	h16c5	47.048	711.578	72.171	Non
aPKC mut	h20c1	40.206	431.582	61.671	Non
aPKC mut	h20c1	40.206	414.95	61.671	Non
aPKC mut	h20c1	40.206	333.148	61.671	Non
aPKC mut	h20c1	42.325	328.071	64.921	Non
aPKC mut	h20c1	42.325	336.369	64.926	Non
aPKC mut	h20c1	42.325	331.869	64.926	Non
aPKC mut	h20c1	42.325	295.965	64.926	Non
aPKC mut	h20c1	42.567	322.842	65.303	Non
aPKC mut	h20c1	40.932	380.775	62.787	Non
aPKC mut	h20c1	41.114	427.623	63.055	Non
aPKC mut	h20c1	41.114	400.43	63.055	Non
aPKC mut	h20c1	41.114	355.379	63.055	Non
aPKC mut	h20c1	41.114	320.957	63.055	Non
aPKC mut	h20c7	34.574	470.598	53.007	Non
aPKC mut	h20c7	34.574	540.25	53.007	Non
aPKC mut	h20c7	34.574	468.623	53.007	Non
aPKC mut	h20c7	34.574	426.845	53.007	Non
aPKC mut	h20c7	34.574	424.499	53.007	Non
aPKC mut	h20c7	34.453	460.652	52.827	Non
aPKC mut	h20c7	34.453	473.941	52.827	Non
aPKC mut	h20c7	34.453	502.514	52.827	Non
aPKC mut	h20c7	34.453	500.881	52.827	Non
aPKC mut	h20c7	34.453	500.982	52.827	Non
aPKC mut	h20c7	34.453	491.977	52.827	Non
aPKC mut	h20c7	33	491.909	50.598	Non
aPKC mut	h20c7	33	470.072	50.598	Non
aPKC mut	h21c1	30.908	244.898	50.174	Non
aPKC mut	h21c1	30.908	257.255	50.174	Non
aPKC mut	h21c1	30.908	251.311	50.174	Non
aPKC mut	h21c1	30.908	239.864	50.174	Non
aPKC mut	h21c1	31.718	289.166	51.496	Non
aPKC mut	h21c1	31.718	292.464	51.496	Non
aPKC mut	h21c1	31.718	282.874	51.496	Non
aPKC mut	h21c1	33.555	293.877	54.472	Non
aPKC mut	h21c1	33.555	278.749	54.472	Non
aPKC mut	h21c1	33.555	268.178	54.472	Non
aPKC mut	h21c1	35.176	253.042	57.11	Non
aPKC mut	h21c1	35.176	255.067	57.11	Non
aPKC mut	h21c1	35.176	258.54	57.11	Non
aPKC mut	h21c5	40.958	165.735	66.494	Non
aPKC mut	h21c5	40.958	192.942	66.494	Non
aPKC mut	h21c5	40.958	199.965	66.494	Non
aPKC mut	h21c5	40.958	229.914	66.494	Non
aPKC mut	h21c5	39.823	281.993	64.673	Non
aPKC mut	h21c5	39.823	297.58	64.673	Non
aPKC mut	h21c5	39.823	302.954	64.673	Non
aPKC mut	h21c5	39.175	303.471	63.61	Non
aPKC mut	h21c5	39.175	362.668	63.61	Non
aPKC mut	h21c5	39.175	370.502	63.61	Non
aPKC mut	h21c5	39.175	379.779	63.61	Non
aPKC mut	h21c5	35.717	350.374	57.99	Non
aPKC mut	h21c5	35.717	351.424	57.99	Non
aPKC mut	h21c5	35.717	340.204	57.99	Non
aPKC mut	h21c5	35.717	317.306	57.99	Non
aPKC mut	h25c1	35.446	254.207	57.546	Non
aPKC mut	h25c1	35.446	301.321	57.546	Non
aPKC mut	h25c1	35.446	326.723	57.546	Non
aPKC mut	h25c1	35.068	364.852	56.934	Non
aPKC mut	h25c1	35.068	365.381	56.934	Non
aPKC mut	h25c1	33.988	426.919	55.192	Non
aPKC mut	h25c1	33.988	435.985	55.192	Non
aPKC mut	h25c1	33.879	473.684	54.998	Non
aPKC mut	h25c1	33.663	492.84	54.647	Non
aPKC mut	h25c1	33.663	504.704	54.647	Non
aPKC mut	h25c1	33.663	492.935	54.647	Non
aPKC mut	h25c1	24.91	552.229	40.424	Non
aPKC mut	h25c1	24.91	541.103	40.424	Non
aPKC mut	h26c1	35.933	148.367	58.353	Non
aPKC mut	h26c1	35.933	196.971	58.353	Non
aPKC mut	h26c1	35.933	255.941	58.353	Non
aPKC mut	h26c1	35.933	283.783	58.353	Non
aPKC mut	h26c1	35.933	297.901	58.353	Non
aPKC mut	h26c1	37.554	294.485	60.988	Non
aPKC mut	h26c1	37.554	316.999	60.988	Non
aPKC mut	h26c1	37.554	299.498	60.988	Non
aPKC mut	h26c1	37.554	271.341	60.988	Non
aPKC mut	h26c1	37.554	254.337	60.988	Non
aPKC mut	h26c1	37.77	350.252	61.338	Non
aPKC mut	h26c1	37.77	360.964	61.338	Non
aPKC mut	h26c1	38.094	372.75	61.858	Non
aPKC mut	h26c1	38.094	370.861	61.858	Non
aPKC mut	h26c4	49.711	146.09	80.755	Non
aPKC mut	h26c4	49.711	162.828	80.755	Non
aPKC mut	h26c4	49.711	223.084	80.755	Non
aPKC mut	h26c4	49.711	249.587	80.755	Non
aPKC mut	h26c4	49.711	252.441	80.755	Non
aPKC mut	h26c4	49.711	257.389	80.755	Non
aPKC mut	h26c4	49.711	263.717	80.755	Non
aPKC mut	h26c4	49.711	281.32	80.755	Non
aPKC mut	h26c4	49.711	310.284	80.755	Non
aPKC mut	h26c4	49.603	346.917	80.569	Non
aPKC mut	h26c4	49.603	337.747	80.569	Non
aPKC mut	h26c4	49.603	318.237	80.569	Non
aPKC mut	h26c4	49.603	298.345	80.569	Non
aPKC mut	h30c1	43.552	150.552	70.738	Non
aPKC mut	h30c1	43.552	182.031	70.738	Non
aPKC mut	h30c1	43.552	200.522	70.738	Non
aPKC mut	h30c1	43.552	205.945	70.738	Non
aPKC mut	h30c1	43.93	216.298	71.349	Non
aPKC mut	h30c1	43.93	223.365	71.349	Non
aPKC mut	h30c1	43.93	230.913	71.349	Non
aPKC mut	h30c1	45.767	264.731	74.343	Non
aPKC mut	h30c1	45.767	276.005	74.343	Non
aPKC mut	h30c1	45.767	271.402	74.343	Non
aPKC mut	h30c1	45.767	265.243	74.343	Non
aPKC mut	h30c1	45.767	248.966	74.343	Non
aPKC mut	h30c1	45.767	215.505	74.343	Non
aPKC mut	h30c1	40.472	220.618	65.723	Non
aPKC mut	h30c1	40.472	245.964	65.723	Non
aPKC mut	h30c1	40.472	266.359	65.723	Non
aPKC mut	h30c2	33.825	125.509	54.923	Non
aPKC mut	h30c2	33.825	159.003	54.923	Non
aPKC mut	h30c2	33.825	204.973	54.923	Non
aPKC mut	h30c2	33.825	244.729	54.923	Non
aPKC mut	h30c2	35.555	285.608	57.728	Non
aPKC mut	h30c2	35.555	295.251	57.728	Non
aPKC mut	h30c2	35.555	287.693	57.728	Non
aPKC mut	h30c2	35.555	272.691	57.728	Non
aPKC mut	h30c2	35.663	304.886	57.902	Non
aPKC mut	h30c2	35.663	301.67	57.902	Non
aPKC mut	h30c2	35.663	296.781	57.902	Non
aPKC mut	h30c2	35.663	290.722	57.902	Non
aPKC mut	h30c2	35.663	282.501	57.902	Non
aPKC mut	h30c2	35.663	263.99	57.902	Non
aPKC mut	h30c2	32.096	270.729	52.12	Non
aPKC mut	h30c2	32.096	268.071	52.12	Non
aPKC mut	h30c2	32.096	274.927	52.12	Non
aPKC mut	h30c3	41.66	158.072	67.654	Non
aPKC mut	h30c3	41.66	177.492	67.654	Non
aPKC mut	h30c3	41.66	191.075	67.654	Non
aPKC mut	h30c3	41.66	199.155	67.654	Non
aPKC mut	h30c3	41.768	209.661	67.826	Non
aPKC mut	h30c3	41.768	210.485	67.826	Non
aPKC mut	h30c3	41.768	208.014	67.826	Non
aPKC mut	h30c3	41.822	234.549	67.941	Non
aPKC mut	h30c3	41.822	231.661	67.941	Non
aPKC mut	h30c3	41.822	222.895	67.941	Non
aPKC mut	h30c3	41.714	218.44	67.747	Non
aPKC mut	h30c3	42.795	240.4	69.495	Non
aPKC mut	h30c3	42.795	230.379	69.495	Non
aPKC mut	h30c3	42.795	213.876	69.495	Non
aPKC mut	h30c3	37.013	239.323	60.103	Non
aPKC mut	h30c3	37.013	232.438	60.103	Non
aPKC mut	h30c3	37.013	221.618	60.103	Non
aPKC mut	h30c4	40.634	170.891	65.981	Non
aPKC mut	h30c4	40.634	232.873	65.981	Non
aPKC mut	h30c4	40.634	266.077	65.981	Non
aPKC mut	h30c4	40.634	283.167	65.981	Non
aPKC mut	h30c4	40.634	289.248	65.981	Non
aPKC mut	h30c4	40.634	288.833	65.981	Non
aPKC mut	h30c4	40.634	276.005	65.981	Non
aPKC mut	h30c4	40.634	258.903	65.981	Non
aPKC mut	h30c4	37.878	362.753	61.514	Non
aPKC mut	h30c4	37.878	353.844	61.514	Non
aPKC mut	h30c4	37.878	345.909	61.514	Non
aPKC mut	h30c4	37.878	333.115	61.514	Non
aPKC mut	h30c4	37.878	307.971	61.514	Non
aPKC mut	h30c4	37.878	280.771	61.514	Non
aPKC mut	h30c5	36.203	142.117	58.781	Non
aPKC mut	h30c5	36.203	172.623	58.781	Non
aPKC mut	h30c5	36.203	223.755	58.781	Non
aPKC mut	h30c5	36.203	246.169	58.781	Non
aPKC mut	h30c5	36.203	255.304	58.781	Non
aPKC mut	h30c5	36.203	255.474	58.781	Non
aPKC mut	h30c5	36.203	251.406	58.781	Non
aPKC mut	h30c5	36.203	238.415	58.781	Non
aPKC mut	h30c5	35.284	287.952	57.289	Non
aPKC mut	h30c5	35.284	275.941	57.289	Non
aPKC mut	h30c5	35.284	272.966	57.289	Non
aPKC mut	h30c5	35.284	267.823	57.289	Non
aPKC mut	h30c5	35.284	261.98	57.289	Non
aPKC mut	h30c5	35.284	248.44	57.289	Non
aPKC mut	h30c5	32.529	251.896	52.814	Non
aPKC mut	h30c5	32.529	250.39	52.814	Non
