# Supplementary material for: Stepwise polarisation of developing bilayered epidermis is mediated by aPKC and E-cadherin in zebrafish
Source: eLife. 2020 Jan 22;9:e49064. doi: 10.7554/eLife.49064 (PMC6975926; doi:10.7554/eLife.49064)
Supplement: Figure 2—figure supplement 4—source data 1. [file elife-49064-fig2-figsupp4-data1.csv]

Genotype	Treatment	Embryo	Cell	Cell name	Slice	Area	Mean	StdDev	Min	Max	Length	Boundary
apkc_sibling_Ecad-mCh	Ecad-mCh	head 1	cell 1	head 1cell 1	1	85.806	237.16	80.05	135.233	923.607	69.581	1
apkc_sibling_Ecad-mCh	Ecad-mCh	head 1	cell 1	head 1cell 1	2	85.806	286.758	119.607	139.863	1041.711	69.581	1
apkc_sibling_Ecad-mCh	Ecad-mCh	head 1	cell 1	head 1cell 1	3	86.022	387.472	187.381	146.477	1558.061	69.755	1
apkc_sibling_Ecad-mCh	Ecad-mCh	head 1	cell 1	head 1cell 1	4	86.022	434.633	216.617	136.602	1842.884	69.755	1
apkc_sibling_Ecad-mCh	Ecad-mCh	head 1	cell 1	head 1cell 1	5	86.022	502.586	241.518	149	2470.765	69.755	1
apkc_sibling_Ecad-mCh	Ecad-mCh	head 1	cell 1	head 1cell 1	6	85.374	525.443	249.085	147.468	2803.769	69.227	1
apkc_sibling_Ecad-mCh	Ecad-mCh	head 1	cell 1	head 1cell 1	7	85.374	538.733	245.963	143.669	2263.723	69.227	1
apkc_sibling_Ecad-mCh	Ecad-mCh	head 1	cell 1	head 1cell 1	8	85.374	556.699	229.382	153.479	1918.272	69.227	1
apkc_sibling_Ecad-mCh	Ecad-mCh	head 1	cell 1	head 1cell 1	9	87.103	627.141	286.178	174.16	2275.06	70.634	1
apkc_sibling_Ecad-mCh	Ecad-mCh	head 1	cell 1	head 1cell 1	10	87.103	632.022	296.642	150.86	2487.99	70.634	1
apkc_sibling_Ecad-mCh	Ecad-mCh	head 1	cell 1	head 1cell 1	11	87.103	634.638	283.455	166.59	3312.878	70.634	1
apkc_sibling_Ecad-mCh	Ecad-mCh	head 1	cell 1	head 1cell 1	12	86.239	636.229	261.99	150.953	2997.527	69.93	1
apkc_sibling_Ecad-mCh	Ecad-mCh	head 1	cell 1	head 1cell 1	13	59.438	633.381	246.964	189.915	1824.746	48.144	1
apkc_sibling_Ecad-mCh	Ecad-mCh	head 1	cell 1	head 1cell 1	14	49.279	597.93	235.125	158.325	1913.193	39.887	1
apkc_sibling_Ecad-mCh	Ecad-mCh	head 1	cell 1	head 1cell 1	15	44.092	595.789	230.635	198.409	1761.742	35.67	1
apkc_sibling_Ecad-mCh	Ecad-mCh	head 1	cell 1	head 1cell 1	16	44.092	589.978	221.405	177.131	1747.352	35.67	1
apkc_sibling_Ecad-mCh	Ecad-mCh	head 1	cell 1	head 1cell 1	17	44.092	574.209	209.057	181.938	1645.291	35.67	1
apkc_sibling_Ecad-mCh	Ecad-mCh	head 1	cell 1	head 1cell 1	18	44.092	559.981	187.569	179.838	1410.221	35.67	1
apkc_sibling_Ecad-mCh	Ecad-mCh	head 1		head 1								1
apkc_sibling_Ecad-mCh	Ecad-mCh	head 1		head 1								1
apkc_sibling_Ecad-mCh	Ecad-mCh	head 1	cell 2	head 1cell 2								1
apkc_sibling_Ecad-mCh	Ecad-mCh	head 1	cell 2	head 1cell 2	1	26.369	287.674	113.146	146.19	913.337	21.261	1
apkc_sibling_Ecad-mCh	Ecad-mCh	head 1	cell 2	head 1cell 2	2	26.369	356.406	168.862	147.434	1326.864	21.261	1
apkc_sibling_Ecad-mCh	Ecad-mCh	head 1	cell 2	head 1cell 2	3	41.498	360.954	187.112	146.598	1697.845	33.561	1
apkc_sibling_Ecad-mCh	Ecad-mCh	head 1	cell 2	head 1cell 2	4	36.959	430.263	216.675	148.269	1967.142	29.869	1
apkc_sibling_Ecad-mCh	Ecad-mCh	head 1	cell 2	head 1cell 2	5	83.213	338.076	186.176	140.659	1697.967	67.474	1
apkc_sibling_Ecad-mCh	Ecad-mCh	head 1	cell 2	head 1cell 2	6	83.213	338.076	186.176	140.659	1697.967	67.474	1
apkc_sibling_Ecad-mCh	Ecad-mCh	head 1	cell 2	head 1cell 2	7	83.213	400.054	222.484	145.727	2073.959	67.474	1
apkc_sibling_Ecad-mCh	Ecad-mCh	head 1	cell 2	head 1cell 2	8	83.213	444.527	229.89	136.377	1921.983	67.474	1
apkc_sibling_Ecad-mCh	Ecad-mCh	head 1	cell 2	head 1cell 2	9	83.213	465.771	238.151	146.819	2070.377	67.474	1
apkc_sibling_Ecad-mCh	Ecad-mCh	head 1	cell 2	head 1cell 2	10	83.213	487.902	244.329	148.85	2323.753	67.474	1
apkc_sibling_Ecad-mCh	Ecad-mCh	head 1	cell 2	head 1cell 2	11	83.213	496.958	228	149	2039.169	67.474	1
apkc_sibling_Ecad-mCh	Ecad-mCh	head 1	cell 2	head 1cell 2	12	83.213	504.757	234.364	148.514	2159.927	67.474	1
apkc_sibling_Ecad-mCh	Ecad-mCh	head 1	cell 2	head 1cell 2	13	83.213	497.383	219.886	154.067	2081.376	67.474	1
apkc_sibling_Ecad-mCh	Ecad-mCh	head 1	cell 2	head 1cell 2	14	83.213	502.236	229.377	149.444	2063.835	67.474	1
apkc_sibling_Ecad-mCh	Ecad-mCh	head 1	cell 2	head 1cell 2	15	84.942	515.793	221.967	158.603	2065.028	68.88	1
apkc_sibling_Ecad-mCh	Ecad-mCh	head 1	cell 2	head 1cell 2	16	84.942	523.862	215.307	160.281	1801.289	68.88	1
apkc_sibling_Ecad-mCh	Ecad-mCh	head 1	cell 2	head 1cell 2	17	50.576	534.365	234.538	158.65	1832.91	40.941	1
apkc_sibling_Ecad-mCh	Ecad-mCh	head 1	cell 2	head 1cell 2	18	46.037	559.384	219.627	166.657	1575.874	37.251	1
apkc_sibling_Ecad-mCh	Ecad-mCh	head 1	cell 2	head 1cell 2	19	46.037	551.758	220.28	161.978	1880.488	37.251	1
apkc_sibling_Ecad-mCh	Ecad-mCh	head 1	cell 2	head 1cell 2	20	46.037	554.408	211.649	167.219	1666.407	37.251	1
apkc_sibling_Ecad-mCh	Ecad-mCh	head 1	cell 2	head 1cell 2	21	30.691	511.246	239.325	152.978	1700.307	24.776	1
apkc_sibling_Ecad-mCh	Ecad-mCh	head 1	cell 2	head 1cell 2	22	10.375	676.942	234.809	278.844	1685.52	8.259	1
apkc_sibling_Ecad-mCh	Ecad-mCh											1
apkc_sibling_Ecad-mCh	Ecad-mCh	head 2	cell 1	head 2cell 1	1	96.829	221.608	59.309	135.169	715.344	78.541	1
apkc_sibling_Ecad-mCh	Ecad-mCh	head 2	cell 1	head 2cell 1	2	96.829	285.63	109.7	142.701	848.662	78.541	1
apkc_sibling_Ecad-mCh	Ecad-mCh	head 2	cell 1	head 2cell 1	3	96.829	350.096	168.645	146.109	1108.957	78.541	1
apkc_sibling_Ecad-mCh	Ecad-mCh	head 2	cell 1	head 2cell 1	4	96.181	445.055	244.862	148.876	1767.802	78.013	1
apkc_sibling_Ecad-mCh	Ecad-mCh	head 2	cell 1	head 2cell 1	5	96.181	508.031	285.44	136.063	2520.334	78.013	1
apkc_sibling_Ecad-mCh	Ecad-mCh	head 2	cell 1	head 2cell 1	6	96.181	521.256	262.772	146.918	2452.417	78.013	1
apkc_sibling_Ecad-mCh	Ecad-mCh	head 2	cell 1	head 2cell 1	7	96.181	521.593	248.204	145.189	2729.354	78.013	1
apkc_sibling_Ecad-mCh	Ecad-mCh	head 2	cell 1	head 2cell 1	8	96.181	530.9	245.491	150.393	2749.826	78.013	1
apkc_sibling_Ecad-mCh	Ecad-mCh	head 2	cell 1	head 2cell 1	9	96.181	544.656	253.056	152.991	2420.688	78.013	1
apkc_sibling_Ecad-mCh	Ecad-mCh	head 2	cell 1	head 2cell 1	10	99.855	594.945	279.239	153.345	2414.508	81.002	1
apkc_sibling_Ecad-mCh	Ecad-mCh	head 2	cell 1	head 2cell 1	11	99.855	626.385	282.832	149.886	2390.769	81.002	1
apkc_sibling_Ecad-mCh	Ecad-mCh	head 2	cell 1	head 2cell 1	12	99.855	670.618	289.011	151.97	2016.577	81.002	1
apkc_sibling_Ecad-mCh	Ecad-mCh	head 2	cell 1	head 2cell 1	13	100.936	651.14	263.83	159.966	2141.447	81.88	1
apkc_sibling_Ecad-mCh	Ecad-mCh	head 2		head 2								1
apkc_sibling_Ecad-mCh	Ecad-mCh	head 2		head 2								1
apkc_sibling_Ecad-mCh	Ecad-mCh	head 2	cell 2	head 2cell 2	1	93.155	225.28	63.639	137.768	562.247	75.545	1
apkc_sibling_Ecad-mCh	Ecad-mCh	head 2	cell 2	head 2cell 2	2	93.155	279.602	108.26	140.497	996.412	75.545	1
apkc_sibling_Ecad-mCh	Ecad-mCh	head 2	cell 2	head 2cell 2	3	93.155	368.128	180.411	139.922	1618.402	75.545	1
apkc_sibling_Ecad-mCh	Ecad-mCh	head 2	cell 2	head 2cell 2	4	93.155	456.893	242.322	142.158	2031.785	75.545	1
apkc_sibling_Ecad-mCh	Ecad-mCh	head 2	cell 2	head 2cell 2	5	93.155	509.864	273.126	147.94	1900.301	75.545	1
apkc_sibling_Ecad-mCh	Ecad-mCh	head 2	cell 2	head 2cell 2	6	93.155	531.177	260.46	141.595	2304.005	75.545	1
apkc_sibling_Ecad-mCh	Ecad-mCh	head 2	cell 2	head 2cell 2	7	93.155	537.743	246.318	149.914	2198.5	75.545	1
apkc_sibling_Ecad-mCh	Ecad-mCh	head 2	cell 2	head 2cell 2	8	93.155	544.745	246.333	143.327	2259.576	75.545	1
apkc_sibling_Ecad-mCh	Ecad-mCh	head 2	cell 2	head 2cell 2	9	93.155	550.562	241.784	152.127	1963.013	75.545	1
apkc_sibling_Ecad-mCh	Ecad-mCh	head 2	cell 2	head 2cell 2	10	96.397	579.06	252.947	151.667	1891.912	78.183	1
apkc_sibling_Ecad-mCh	Ecad-mCh	head 2	cell 2	head 2cell 2	11	96.613	604.199	271.63	151.046	2116.569	78.364	1
apkc_sibling_Ecad-mCh	Ecad-mCh	head 2	cell 2	head 2cell 2	12	96.613	614.535	287.488	147.628	2573.254	78.364	1
apkc_sibling_Ecad-mCh	Ecad-mCh	head 2	cell 2	head 2cell 2	13	96.613	622.073	282.713	161.825	2371.749	78.364	1
apkc_sibling_Ecad-mCh	Ecad-mCh	head 2	cell 2	head 2cell 2	14	97.045	584.083	252.576	145.734	2217.539	78.716	1
apkc_sibling_Ecad-mCh	Ecad-mCh	head 2		head 2								1
apkc_sibling_Ecad-mCh	Ecad-mCh	head 2		head 2								1
apkc_sibling_Ecad-mCh	Ecad-mCh	head 2	cell 3	head 2cell 3	1	109.581	227.746	68.026	140.174	617.574	88.907	1
apkc_sibling_Ecad-mCh	Ecad-mCh	head 2	cell 3	head 2cell 3	2	109.581	280.435	112.77	126.911	1131.059	88.907	1
apkc_sibling_Ecad-mCh	Ecad-mCh	head 2	cell 3	head 2cell 3	3	109.581	359.641	189.058	142.365	1501.695	88.907	1
apkc_sibling_Ecad-mCh	Ecad-mCh	head 2	cell 3	head 2cell 3	4	109.581	442.554	262.933	142.477	2035.858	88.907	1
apkc_sibling_Ecad-mCh	Ecad-mCh	head 2	cell 3	head 2cell 3	5	107.636	540.245	297.018	146.268	2657.886	87.324	1
apkc_sibling_Ecad-mCh	Ecad-mCh	head 2	cell 3	head 2cell 3	6	107.636	552.599	282.487	148.243	2721.786	87.324	1
apkc_sibling_Ecad-mCh	Ecad-mCh	head 2	cell 3	head 2cell 3	7	107.636	552.694	265.522	152.463	2223.458	87.324	1
apkc_sibling_Ecad-mCh	Ecad-mCh	head 2	cell 3	head 2cell 3	8	107.636	545.88	259.333	147.191	2144.705	87.324	1
apkc_sibling_Ecad-mCh	Ecad-mCh	head 2	cell 3	head 2cell 3	9	104.826	589.529	275.91	153.404	2554.181	85.041	1
apkc_sibling_Ecad-mCh	Ecad-mCh	head 2	cell 3	head 2cell 3	10	104.826	628.9	294.308	165.523	2292.762	85.041	1
apkc_sibling_Ecad-mCh	Ecad-mCh	head 2	cell 3	head 2cell 3	11	104.826	687.694	299.703	149.162	2229.205	85.041	1
apkc_sibling_Ecad-mCh	Ecad-mCh	head 2	cell 3	head 2cell 3	12	79.322	675.461	296.315	159.618	2073.075	64.311	1
apkc_sibling_Ecad-mCh	Ecad-mCh	head 2	cell 3	head 2cell 3	13	17.291	625.102	243.818	176.033	1662.279	13.882	1
apkc_sibling_Ecad-mCh	Ecad-mCh	head 2		head 2								1
apkc_sibling_Ecad-mCh	Ecad-mCh	head 2		head 2								1
apkc_sibling_Ecad-mCh	Ecad-mCh	head 2		head 2								1
apkc_sibling_Ecad-mCh	Ecad-mCh	head 2	cell 4	head 2cell 4	1	111.959	244.957	77.996	140.016	757.893	90.836	1
apkc_sibling_Ecad-mCh	Ecad-mCh	head 2	cell 4	head 2cell 4	2	111.959	320.014	148.868	142.396	1135.473	90.836	1
apkc_sibling_Ecad-mCh	Ecad-mCh	head 2	cell 4	head 2cell 4	3	111.959	430.96	240.819	140.008	2289.719	90.836	1
apkc_sibling_Ecad-mCh	Ecad-mCh	head 2	cell 4	head 2cell 4	4	111.959	501.451	277.815	136.013	2425.748	90.836	1
apkc_sibling_Ecad-mCh	Ecad-mCh	head 2	cell 4	head 2cell 4	5	111.959	511.829	257.51	149.389	2499.329	90.836	1
apkc_sibling_Ecad-mCh	Ecad-mCh	head 2	cell 4	head 2cell 4	6	110.014	530.535	256.57	146.044	2365.929	89.257	1
apkc_sibling_Ecad-mCh	Ecad-mCh	head 2	cell 4	head 2cell 4	7	110.014	534.661	244.439	144.919	1986.69	89.257	1
apkc_sibling_Ecad-mCh	Ecad-mCh	head 2	cell 4	head 2cell 4	8	110.014	559.311	256.59	146.922	1846.211	89.257	1
apkc_sibling_Ecad-mCh	Ecad-mCh	head 2	cell 4	head 2cell 4	9	110.014	602.813	283.032	149.974	1962.77	89.257	1
apkc_sibling_Ecad-mCh	Ecad-mCh	head 2	cell 4	head 2cell 4	10	101.152	675.857	288.492	159.327	1922.497	82.057	1
apkc_sibling_Ecad-mCh	Ecad-mCh	head 2	cell 4	head 2cell 4	11	101.152	655.595	264.156	151.347	1852	82.057	1
apkc_sibling_Ecad-mCh	Ecad-mCh	head 2	cell 4	head 2cell 4	12	45.389	577.524	264.908	175.441	1954.937	36.724	1
apkc_sibling_Ecad-mCh	Ecad-mCh	head 2		head 2								1
apkc_sibling_Ecad-mCh	Ecad-mCh	head 2		head 2								1
apkc_sibling_Ecad-mCh	Ecad-mCh	head 2	cell 5	head 2cell 5	1	94.452	227.711	67.534	140.334	639.089	76.609	1
apkc_sibling_Ecad-mCh	Ecad-mCh	head 2	cell 5	head 2cell 5	2	94.452	323.426	158.542	141.704	1160.364	76.609	1
apkc_sibling_Ecad-mCh	Ecad-mCh	head 2	cell 5	head 2cell 5	3	94.452	425.027	259.559	145.684	1558.646	76.609	1
apkc_sibling_Ecad-mCh	Ecad-mCh	head 2	cell 5	head 2cell 5	4	94.452	489.523	298.192	148.607	3031.573	76.609	1
apkc_sibling_Ecad-mCh	Ecad-mCh	head 2	cell 5	head 2cell 5	5	94.452	520.031	300.656	149.377	3017.713	76.609	1
apkc_sibling_Ecad-mCh	Ecad-mCh	head 2	cell 5	head 2cell 5	6	94.452	529.375	289.031	145.622	2710.232	76.609	1
apkc_sibling_Ecad-mCh	Ecad-mCh	head 2	cell 5	head 2cell 5	7	94.452	536.086	296.184	141.826	3156.011	76.609	1
apkc_sibling_Ecad-mCh	Ecad-mCh	head 2	cell 5	head 2cell 5	8	92.507	593.208	314.275	148.427	2463.634	75.028	1
apkc_sibling_Ecad-mCh	Ecad-mCh	head 2	cell 5	head 2cell 5	9	92.507	620.517	335.426	147.495	2755.946	75.028	1
apkc_sibling_Ecad-mCh	Ecad-mCh	head 2	cell 5	head 2cell 5	10	92.507	638.871	336.97	152.649	2403.343	75.028	1
apkc_sibling_Ecad-mCh	Ecad-mCh	head 2	cell 5	head 2cell 5	11	92.507	615.721	298.501	152.298	2495.412	75.028	1
apkc_sibling_Ecad-mCh	Ecad-mCh	head 2	cell 5	head 2cell 5	12	92.507	544.825	248.881	147.907	1580.51	75.028	1
apkc_sibling_Ecad-mCh	Ecad-mCh	head 2	cell 5	head 2cell 5	13	8.862	694.844	295.919	239.063	1582.626	7.029	1
apkc_sibling_Ecad-mCh	Ecad-mCh	head 2		head 2								1
apkc_sibling_Ecad-mCh	Ecad-mCh	head 2		head 2								1
apkc_sibling_Ecad-mCh	Ecad-mCh	head 2	cell 6	head 2cell 6	1	102.233	205.836	51.584	140.471	604.784	82.93	1
apkc_sibling_Ecad-mCh	Ecad-mCh	head 2	cell 6	head 2cell 6	2	102.233	244.905	82.86	138.596	659.18	82.93	1
apkc_sibling_Ecad-mCh	Ecad-mCh	head 2	cell 6	head 2cell 6	3	102.233	351.354	193.877	138.606	1480.026	82.93	1
apkc_sibling_Ecad-mCh	Ecad-mCh	head 2	cell 6	head 2cell 6	4	102.233	443.895	280.578	132.833	1887.159	82.93	1
apkc_sibling_Ecad-mCh	Ecad-mCh	head 2	cell 6	head 2cell 6	5	100.936	497.764	285.193	146.49	2281.936	81.877	1
apkc_sibling_Ecad-mCh	Ecad-mCh	head 2	cell 6	head 2cell 6	6	100.936	497.017	286.406	143.581	3348.137	81.877	1
apkc_sibling_Ecad-mCh	Ecad-mCh	head 2	cell 6	head 2cell 6	7	100.936	487.498	265.042	147.34	3033.077	81.877	1
apkc_sibling_Ecad-mCh	Ecad-mCh	head 2	cell 6	head 2cell 6	8	100.936	485.756	256.312	144.312	2932.368	81.877	1
apkc_sibling_Ecad-mCh	Ecad-mCh	head 2	cell 6	head 2cell 6	9	100.936	550.31	281.4	141.984	2847.168	81.881	1
apkc_sibling_Ecad-mCh	Ecad-mCh	head 2	cell 6	head 2cell 6	10	100.936	576.249	299.746	143.484	2365.56	81.881	1
apkc_sibling_Ecad-mCh	Ecad-mCh	head 2	cell 6	head 2cell 6	11	99.639	647.244	299.283	140.452	2216.588	80.824	1
apkc_sibling_Ecad-mCh	Ecad-mCh	head 2	cell 6	head 2cell 6	12	99.639	595.941	281.711	145.446	2153.962	80.824	1
apkc_sibling_Ecad-mCh	Ecad-mCh	head 2	cell 6	head 2cell 6	13	18.804	772.105	324.084	170.243	1831.36	15.111	1
apkc_sibling_Ecad-mCh	Ecad-mCh											1
apkc_sibling_Ecad-mCh	Ecad-mCh	head 3	cell 1	head 3cell 1	1	96.181	239.626	72.447	139.591	695.88	78.014	1
apkc_sibling_Ecad-mCh	Ecad-mCh	head 3	cell 1	head 3cell 1	2	96.181	294.29	126.244	145.105	1213.086	78.014	1
apkc_sibling_Ecad-mCh	Ecad-mCh	head 3	cell 1	head 3cell 1	3	95.316	381.294	202.821	140.42	1827.312	77.309	1
apkc_sibling_Ecad-mCh	Ecad-mCh	head 3	cell 1	head 3cell 1	4	95.316	521.665	338.031	142.127	2723.038	77.309	1
apkc_sibling_Ecad-mCh	Ecad-mCh	head 3	cell 1	head 3cell 1	5	95.316	623.306	456.403	144.242	3916.251	77.309	1
apkc_sibling_Ecad-mCh	Ecad-mCh	head 3	cell 1	head 3cell 1	6	95.1	706.495	481.972	151.619	3954.792	77.133	1
apkc_sibling_Ecad-mCh	Ecad-mCh	head 3	cell 1	head 3cell 1	7	95.1	769.07	472.57	148.933	3884.008	77.133	1
apkc_sibling_Ecad-mCh	Ecad-mCh	head 3	cell 1	head 3cell 1	8	93.587	877.189	491.285	171.282	3832.951	75.907	1
apkc_sibling_Ecad-mCh	Ecad-mCh	head 3	cell 1	head 3cell 1	9	93.587	932.002	540.228	155.908	3636.454	75.907	1
apkc_sibling_Ecad-mCh	Ecad-mCh	head 3	cell 1	head 3cell 1	10	91.858	1054.47	556.668	198.621	3684.185	74.501	1
apkc_sibling_Ecad-mCh	Ecad-mCh	head 3	cell 1	head 3cell 1	11	91.858	1010.96	497.165	192.944	3145.107	74.501	1
apkc_sibling_Ecad-mCh	Ecad-mCh	head 3	cell 1	head 3cell 1	12	91.858	816.843	380.032	208.915	3349.617	74.501	1
apkc_sibling_Ecad-mCh	Ecad-mCh	head 3	cell 1	head 3cell 1	13	50.36	712.004	288.712	189.018	2295.514	40.765	1
apkc_sibling_Ecad-mCh	Ecad-mCh	head 3		head 3								1
apkc_sibling_Ecad-mCh	Ecad-mCh	head 3		head 3								1
apkc_sibling_Ecad-mCh	Ecad-mCh	head 3	cell 2	head 3cell 2	1	88.184	223.995	61.819	134.621	559.588	71.511	1
apkc_sibling_Ecad-mCh	Ecad-mCh	head 3	cell 2	head 3cell 2	2	88.184	281.175	110.732	142.79	880.973	71.511	1
apkc_sibling_Ecad-mCh	Ecad-mCh	head 3	cell 2	head 3cell 2	3	88.184	357.783	176.999	142.128	1303.149	71.499	1
apkc_sibling_Ecad-mCh	Ecad-mCh	head 3	cell 2	head 3cell 2	4	88.184	489.428	302.516	134.4	2249.762	71.499	1
apkc_sibling_Ecad-mCh	Ecad-mCh	head 3	cell 2	head 3cell 2	5	88.184	584.473	380.044	148.883	3081.024	71.499	1
apkc_sibling_Ecad-mCh	Ecad-mCh	head 3	cell 2	head 3cell 2	6	88.184	614.426	410.779	145.578	3476.719	71.499	1
apkc_sibling_Ecad-mCh	Ecad-mCh	head 3	cell 2	head 3cell 2	7	89.481	659.246	431.34	148.735	3936.39	72.565	1
apkc_sibling_Ecad-mCh	Ecad-mCh	head 3	cell 2	head 3cell 2	8	86.887	769.332	457.974	163.625	3518.25	70.459	1
apkc_sibling_Ecad-mCh	Ecad-mCh	head 3	cell 2	head 3cell 2	9	86.887	846.42	482.219	145.081	3674.773	70.459	1
apkc_sibling_Ecad-mCh	Ecad-mCh	head 3	cell 2	head 3cell 2	10	87.319	862.731	481.35	147.142	3937.084	70.811	1
apkc_sibling_Ecad-mCh	Ecad-mCh	head 3	cell 2	head 3cell 2	11	87.319	826.133	451.002	157.671	3862.419	70.811	1
apkc_sibling_Ecad-mCh	Ecad-mCh	head 3	cell 2	head 3cell 2	12	68.515	748.129	388.627	161.836	2729.626	55.522	1
apkc_sibling_Ecad-mCh	Ecad-mCh	head 3	cell 2	head 3cell 2	13	63.328	641.982	306.308	160.837	2048.819	51.305	1
apkc_sibling_Ecad-mCh	Ecad-mCh	head 3		head 3								1
apkc_sibling_Ecad-mCh	Ecad-mCh	head 3		head 3								1
apkc_sibling_Ecad-mCh	Ecad-mCh	head 3	cell 3	head 3cell 3	1	96.613	266.142	85.015	141.652	818.122	78.366	1
apkc_sibling_Ecad-mCh	Ecad-mCh	head 3	cell 3	head 3cell 3	2	96.613	328.032	138.062	146.221	994.491	78.366	1
apkc_sibling_Ecad-mCh	Ecad-mCh	head 3	cell 3	head 3cell 3	3	96.613	454.364	252.605	144.3	1808.783	78.366	1
apkc_sibling_Ecad-mCh	Ecad-mCh	head 3	cell 3	head 3cell 3	4	96.613	628.826	423.67	146.924	3291.691	78.366	1
apkc_sibling_Ecad-mCh	Ecad-mCh	head 3	cell 3	head 3cell 3	5	95.532	755.352	513.008	154.896	3674.191	77.486	1
apkc_sibling_Ecad-mCh	Ecad-mCh	head 3	cell 3	head 3cell 3	6	95.532	866.296	568.046	159.071	4068.64	77.486	1
apkc_sibling_Ecad-mCh	Ecad-mCh	head 3	cell 3	head 3cell 3	7	94.668	975.076	568.787	170.13	4087.844	76.784	1
apkc_sibling_Ecad-mCh	Ecad-mCh	head 3	cell 3	head 3cell 3	8	94.668	1033.465	575.436	163.762	4029.822	76.784	1
apkc_sibling_Ecad-mCh	Ecad-mCh	head 3	cell 3	head 3cell 3	9	95.965	1178.826	637.025	202.604	4023.043	77.835	1
apkc_sibling_Ecad-mCh	Ecad-mCh	head 3	cell 3	head 3cell 3	10	95.1	1351.445	694.382	232.401	3842.324	77.136	1
apkc_sibling_Ecad-mCh	Ecad-mCh	head 3	cell 3	head 3cell 3	11	95.965	1378.495	681.079	218.664	3601.619	77.839	1
apkc_sibling_Ecad-mCh	Ecad-mCh	head 3	cell 3	head 3cell 3	12	95.965	1269.647	620.823	280.724	3668.409	77.839	1
apkc_sibling_Ecad-mCh	Ecad-mCh	head 3	cell 3	head 3cell 3	13	95.749	1058.065	547.843	212.657	3625.138	77.663	1
apkc_sibling_Ecad-mCh	Ecad-mCh	head 3	cell 3	head 3cell 3	14	12.752	1089.876	436.702	242.085	2835.448	10.192	1
apkc_sibling_Ecad-mCh	Ecad-mCh	head 3	cell 3	head 3cell 3	15	9.51	969.016	363.21	339.366	2390.017	7.556	1
apkc_sibling_Ecad-mCh	Ecad-mCh	head 3		head 3								1
apkc_sibling_Ecad-mCh	Ecad-mCh	head 3		head 3								1
apkc_sibling_Ecad-mCh	Ecad-mCh	head 3	cell 4	head 3cell 4	1	91.21	234.305	64.738	136.969	615.692	73.971	1
apkc_sibling_Ecad-mCh	Ecad-mCh	head 3	cell 4	head 3cell 4	2	91.21	331.666	143.034	140.491	1201.091	73.971	1
apkc_sibling_Ecad-mCh	Ecad-mCh	head 3	cell 4	head 3cell 4	3	91.21	477.003	277.282	145.56	2099.08	73.972	1
apkc_sibling_Ecad-mCh	Ecad-mCh	head 3	cell 4	head 3cell 4	4	91.21	660.297	429.656	143.869	2990.605	73.972	1
apkc_sibling_Ecad-mCh	Ecad-mCh	head 3	cell 4	head 3cell 4	5	90.129	839.418	566.117	145.733	3981.988	73.09	1
apkc_sibling_Ecad-mCh	Ecad-mCh	head 3	cell 4	head 3cell 4	6	90.129	902.306	580.906	151.706	4090.085	73.09	1
apkc_sibling_Ecad-mCh	Ecad-mCh	head 3	cell 4	head 3cell 4	7	91.426	933.66	583.29	166.375	4082.67	74.149	1
apkc_sibling_Ecad-mCh	Ecad-mCh	head 3	cell 4	head 3cell 4	8	91.426	1051.281	624.076	154.353	4082.179	74.149	1
apkc_sibling_Ecad-mCh	Ecad-mCh	head 3	cell 4	head 3cell 4	9	91.426	1189.664	719.333	179.391	4080.595	74.149	1
apkc_sibling_Ecad-mCh	Ecad-mCh	head 3	cell 4	head 3cell 4	10	91.21	1287.585	778.535	162.618	4089.483	73.973	1
apkc_sibling_Ecad-mCh	Ecad-mCh	head 3	cell 4	head 3cell 4	11	91.21	1350.949	721.444	232.224	3869.365	73.973	1
apkc_sibling_Ecad-mCh	Ecad-mCh	head 3	cell 4	head 3cell 4	12	91.21	1107.713	533.412	227.871	3501.448	73.973	1
apkc_sibling_Ecad-mCh	Ecad-mCh	head 3	cell 4	head 3cell 4	13	83.213	866.348	416.589	195.877	2790.316	67.473	1
apkc_sibling_Ecad-mCh	Ecad-mCh	head 3	cell 4	head 3cell 4	14	15.13	1042.837	361.488	247.155	2271.375	12.125	1
apkc_sibling_Ecad-mCh	Ecad-mCh	head 3		head 3								1
apkc_sibling_Ecad-mCh	Ecad-mCh	head 3		head 3								1
apkc_sibling_Ecad-mCh	Ecad-mCh	head 3		head 3								1
apkc_sibling_Ecad-mCh	Ecad-mCh	head 3	cell 5	head 3cell 5	1	97.478	227.678	58.49	138.871	540.36	79.069	1
apkc_sibling_Ecad-mCh	Ecad-mCh	head 3	cell 5	head 3cell 5	2	97.478	276.928	95.978	140.285	769.531	79.069	1
apkc_sibling_Ecad-mCh	Ecad-mCh	head 3	cell 5	head 3cell 5	3	97.478	479.321	287.316	138.839	2129.64	79.069	1
apkc_sibling_Ecad-mCh	Ecad-mCh	head 3	cell 5	head 3cell 5	4	99.639	713.858	494.495	144.025	3722.986	80.823	1
apkc_sibling_Ecad-mCh	Ecad-mCh	head 3	cell 5	head 3cell 5	5	99.639	840.904	578.32	143.902	3995.176	80.823	1
apkc_sibling_Ecad-mCh	Ecad-mCh	head 3	cell 5	head 3cell 5	6	99.639	932.814	604.091	147.562	4095	80.823	1
apkc_sibling_Ecad-mCh	Ecad-mCh	head 3	cell 5	head 3cell 5	7	99.639	947.995	589.861	153.849	4019.863	80.823	1
apkc_sibling_Ecad-mCh	Ecad-mCh	head 3	cell 5	head 3cell 5	8	100.72	1040.733	634.929	155.254	4091.998	81.704	1
apkc_sibling_Ecad-mCh	Ecad-mCh	head 3	cell 5	head 3cell 5	9	100.72	1259.654	738.527	202.719	3979.752	81.704	1
apkc_sibling_Ecad-mCh	Ecad-mCh	head 3	cell 5	head 3cell 5	10	100.287	1442.986	699.984	238.129	3978.044	81.348	1
apkc_sibling_Ecad-mCh	Ecad-mCh	head 3	cell 5	head 3cell 5	11	100.287	1383.57	649.268	245.12	4037.88	81.348	1
apkc_sibling_Ecad-mCh	Ecad-mCh	head 3	cell 5	head 3cell 5	12	100.287	1199.311	536.325	281.249	3625.965	81.348	1
apkc_sibling_Ecad-mCh	Ecad-mCh	head 3	cell 5	head 3cell 5	13	100.287	857.911	393.221	239.751	3111.348	81.348	1
apkc_sibling_Ecad-mCh	Ecad-mCh	head 3		head 3								1
apkc_sibling_Ecad-mCh	Ecad-mCh	head 3		head 3								1
apkc_sibling_Ecad-mCh	Ecad-mCh	head 3	cell 6	head 3cell 6	1	100.071	232.023	69.689	0	587.179	81.179	1
apkc_sibling_Ecad-mCh	Ecad-mCh	head 3	cell 6	head 3cell 6	2	100.071	272.33	96.332	0	733.136	81.179	1
apkc_sibling_Ecad-mCh	Ecad-mCh	head 3	cell 6	head 3cell 6	3	100.071	392.022	190.17	0	1361.375	81.179	1
apkc_sibling_Ecad-mCh	Ecad-mCh	head 3	cell 6	head 3cell 6	4	100.071	718.442	523.962	0	3313.653	81.179	1
apkc_sibling_Ecad-mCh	Ecad-mCh	head 3	cell 6	head 3cell 6	5	98.342	1071.186	744.326	147.643	4094.892	79.77	1
apkc_sibling_Ecad-mCh	Ecad-mCh	head 3	cell 6	head 3cell 6	6	98.342	1187.54	726.989	156.574	4095	79.77	1
apkc_sibling_Ecad-mCh	Ecad-mCh	head 3	cell 6	head 3cell 6	7	98.558	1222.544	724.922	200.104	4095	79.945	1
apkc_sibling_Ecad-mCh	Ecad-mCh	head 3	cell 6	head 3cell 6	8	98.558	1308.579	767.947	168.149	4095	79.945	1
apkc_sibling_Ecad-mCh	Ecad-mCh	head 3	cell 6	head 3cell 6	9	98.558	1492.608	876.354	199.241	4095	79.945	1
apkc_sibling_Ecad-mCh	Ecad-mCh	head 3	cell 6	head 3cell 6	10	100.071	1728.903	890.882	179.158	4090.924	81.175	1
apkc_sibling_Ecad-mCh	Ecad-mCh	head 3	cell 6	head 3cell 6	11	100.071	1504.281	768.337	162.755	4095	81.175	1
apkc_sibling_Ecad-mCh	Ecad-mCh	head 3	cell 6	head 3cell 6	12	85.59	1328.398	582.564	341.681	4093.688	69.403	1
apkc_sibling_Ecad-mCh	Ecad-mCh	head 3	cell 6	head 3cell 6	13	72.622	958.498	481.526	229.891	4030.228	58.861	1
apkc_sibling_Ecad-mCh	Ecad-mCh	head 3		head 3								1
apkc_sibling_Ecad-mCh	Ecad-mCh	head 3		head 3								1
apkc_sibling_Ecad-mCh	Ecad-mCh	head 3	cell 7	head 3cell 7	1	95.1	222.402	58.526	136.163	615.203	77.136	1
apkc_sibling_Ecad-mCh	Ecad-mCh	head 3	cell 7	head 3cell 7	2	95.1	279.58	110.732	136.798	874.91	77.136	1
apkc_sibling_Ecad-mCh	Ecad-mCh	head 3	cell 7	head 3cell 7	3	95.1	401.627	243.744	139.456	1799.539	77.136	1
apkc_sibling_Ecad-mCh	Ecad-mCh	head 3	cell 7	head 3cell 7	4	95.1	670.058	497.25	143.247	3537.868	77.136	1
apkc_sibling_Ecad-mCh	Ecad-mCh	head 3	cell 7	head 3cell 7	5	95.1	789.625	568.255	149.064	4091.57	77.136	1
apkc_sibling_Ecad-mCh	Ecad-mCh	head 3	cell 7	head 3cell 7	6	95.316	905.323	576.12	157.259	4016.394	77.311	1
apkc_sibling_Ecad-mCh	Ecad-mCh	head 3	cell 7	head 3cell 7	7	95.316	948.688	577.067	161.229	4070.478	77.311	1
apkc_sibling_Ecad-mCh	Ecad-mCh	head 3	cell 7	head 3cell 7	8	94.884	971.957	576.188	154.65	3973.137	76.961	1
apkc_sibling_Ecad-mCh	Ecad-mCh	head 3	cell 7	head 3cell 7	9	94.884	1150.053	661.673	178.393	3751.168	76.961	1
apkc_sibling_Ecad-mCh	Ecad-mCh	head 3	cell 7	head 3cell 7	10	98.126	1201.205	656.409	197.961	3837.171	79.594	1
apkc_sibling_Ecad-mCh	Ecad-mCh	head 3	cell 7	head 3cell 7	11	98.126	1122.67	537.929	262.683	4022.323	79.594	1
apkc_sibling_Ecad-mCh	Ecad-mCh	head 3	cell 7	head 3cell 7	12	98.126	989.246	469.853	264.809	3949.067	79.594	1
apkc_sibling_Ecad-mCh	Ecad-mCh	head 3	cell 7	head 3cell 7	13	101.368	822.21	483.499	165.63	4012.29	82.226	1
apkc_sibling_Ecad-mCh	Ecad-mCh	head 3	cell 7	head 3cell 7	14	20.101	873.724	355.599	265.444	2476.339	16.166	1
apkc_sibling_Ecad-mCh	Ecad-mCh	head 3	cell 7	head 3cell 7	15	15.994	833.443	308.351	277.146	2074.763	12.827	1
apkc_sibling_Ecad-mCh	Ecad-mCh	head 3	cell 7	head 3cell 7	16	12.752	750.912	258.128	238.87	1679.03	10.192	1
apkc_sibling_Ecad-mCh	Ecad-mCh											1
apkc_sibling_Ecad-mCh	Ecad-mCh	head 4	cell 1	head 4cell 1	1	97.045	241.011	65.161	138.064	644.693	78.717	1
apkc_sibling_Ecad-mCh	Ecad-mCh	head 4	cell 1	head 4cell 1	2	97.045	294.535	106.424	137.128	933.865	78.717	1
apkc_sibling_Ecad-mCh	Ecad-mCh	head 4	cell 1	head 4cell 1	3	97.045	325.737	133.937	141.969	1036.727	78.717	1
apkc_sibling_Ecad-mCh	Ecad-mCh	head 4	cell 1	head 4cell 1	4	95.1	399.346	183.684	148.342	1400.409	77.135	1
apkc_sibling_Ecad-mCh	Ecad-mCh	head 4	cell 1	head 4cell 1	5	95.1	501.385	260.367	148.832	1737.749	77.135	1
apkc_sibling_Ecad-mCh	Ecad-mCh	head 4	cell 1	head 4cell 1	6	95.1	646.093	370.556	152.537	2397.106	77.135	1
apkc_sibling_Ecad-mCh	Ecad-mCh	head 4	cell 1	head 4cell 1	7	96.829	754.367	407.806	155.907	3581.131	78.54	1
apkc_sibling_Ecad-mCh	Ecad-mCh	head 4	cell 1	head 4cell 1	8	95.965	833.487	386.789	186.971	3609.332	77.838	1
apkc_sibling_Ecad-mCh	Ecad-mCh	head 4	cell 1	head 4cell 1	9	95.965	919.31	433.704	160.107	3668.902	77.838	1
apkc_sibling_Ecad-mCh	Ecad-mCh	head 4	cell 1	head 4cell 1	10	98.126	964.287	463.915	154.042	3572.967	79.596	1
apkc_sibling_Ecad-mCh	Ecad-mCh	head 4	cell 1	head 4cell 1	11	98.126	1053.568	483.031	163.616	3320.177	79.596	1
apkc_sibling_Ecad-mCh	Ecad-mCh	head 4	cell 1	head 4cell 1	12	97.91	1105.438	483.242	178.351	3191.48	79.421	1
apkc_sibling_Ecad-mCh	Ecad-mCh	head 4	cell 1	head 4cell 1	13	101.152	1041.969	457.34	259.766	3375.391	82.055	1
apkc_sibling_Ecad-mCh	Ecad-mCh	head 4	cell 1	head 4cell 1	14	65.706	982.238	429.92	205.187	2620.525	53.239	1
apkc_sibling_Ecad-mCh	Ecad-mCh	head 4	cell 1	head 4cell 1	15	22.046	920.93	375.8	231.849	2684.74	17.747	1
apkc_sibling_Ecad-mCh	Ecad-mCh	head 4		head 4								1
apkc_sibling_Ecad-mCh	Ecad-mCh	head 4		head 4								1
apkc_sibling_Ecad-mCh	Ecad-mCh	head 4	cell 2	head 4cell 2	1	86.455	251.211	75.892	128.822	679.845	70.105	1
apkc_sibling_Ecad-mCh	Ecad-mCh	head 4	cell 2	head 4cell 2	2	86.455	273.824	94.404	141.121	875.939	70.105	1
apkc_sibling_Ecad-mCh	Ecad-mCh	head 4	cell 2	head 4cell 2	3	86.455	306.373	123.632	145.829	977.829	70.105	1
apkc_sibling_Ecad-mCh	Ecad-mCh	head 4	cell 2	head 4cell 2	4	86.455	360.204	185.435	144.244	1454.163	70.105	1
apkc_sibling_Ecad-mCh	Ecad-mCh	head 4	cell 2	head 4cell 2	5	85.59	517.844	275.23	149.11	1703.686	69.401	1
apkc_sibling_Ecad-mCh	Ecad-mCh	head 4	cell 2	head 4cell 2	6	85.59	616.817	335.605	148.638	2761.54	69.401	1
apkc_sibling_Ecad-mCh	Ecad-mCh	head 4	cell 2	head 4cell 2	7	85.374	674.673	341.988	152.58	3169.618	69.225	1
apkc_sibling_Ecad-mCh	Ecad-mCh	head 4	cell 2	head 4cell 2	8	85.374	680.633	359.026	151.461	3374.844	69.225	1
apkc_sibling_Ecad-mCh	Ecad-mCh	head 4	cell 2	head 4cell 2	9	85.158	749.585	358.32	184.979	3552.024	69.054	1
apkc_sibling_Ecad-mCh	Ecad-mCh	head 4	cell 2	head 4cell 2	10	85.158	839.052	403.659	155.112	3100.63	69.054	1
apkc_sibling_Ecad-mCh	Ecad-mCh	head 4	cell 2	head 4cell 2	11	87.319	907.203	434.309	162.773	2919.3	70.801	1
apkc_sibling_Ecad-mCh	Ecad-mCh	head 4	cell 2	head 4cell 2	12	88.616	949.322	424.466	223.303	2908.573	71.862	1
apkc_sibling_Ecad-mCh	Ecad-mCh	head 4	cell 2	head 4cell 2	13	88.616	929.264	380.71	180.42	3015.575	71.862	1
apkc_sibling_Ecad-mCh	Ecad-mCh	head 4	cell 2	head 4cell 2	14	65.922	928.546	377.315	202.494	2676.93	53.415	1
apkc_sibling_Ecad-mCh	Ecad-mCh	head 4	cell 2	head 4cell 2	15	65.706	939.462	377.403	276.124	3773.628	53.239	1
apkc_sibling_Ecad-mCh	Ecad-mCh	head 4	cell 2	head 4cell 2	16	55.979	755.772	357.609	211.857	3068.294	45.334	1
apkc_sibling_Ecad-mCh	Ecad-mCh											1
apkc_sibling_Ecad-mCh	Ecad-mCh	head 5	cell 1	head 5cell 1	1	94.236	213.838	59.241	142.765	776.056	76.43	1
apkc_sibling_Ecad-mCh	Ecad-mCh	head 5	cell 1	head 5cell 1	2	94.236	262.057	106.559	140.209	1085.268	76.43	1
apkc_sibling_Ecad-mCh	Ecad-mCh	head 5	cell 1	head 5cell 1	3	94.236	311.672	164.725	132.594	1322.172	76.43	1
apkc_sibling_Ecad-mCh	Ecad-mCh	head 5	cell 1	head 5cell 1	4	95.1	325.869	189.986	138.38	1747.278	77.132	1
apkc_sibling_Ecad-mCh	Ecad-mCh	head 5	cell 1	head 5cell 1	5	95.965	425.917	236.635	146.638	1852.802	77.835	1
apkc_sibling_Ecad-mCh	Ecad-mCh	head 5	cell 1	head 5cell 1	6	95.965	447.762	255.387	143.331	2098.808	77.835	1
apkc_sibling_Ecad-mCh	Ecad-mCh	head 5	cell 1	head 5cell 1	7	95.965	444.662	245.697	148.27	2078.291	77.835	1
apkc_sibling_Ecad-mCh	Ecad-mCh	head 5	cell 1	head 5cell 1	8	93.155	501.915	256.004	141.543	2571.229	75.553	1
apkc_sibling_Ecad-mCh	Ecad-mCh	head 5	cell 1	head 5cell 1	9	93.155	528.262	282.614	146.504	2084.944	75.553	1
apkc_sibling_Ecad-mCh	Ecad-mCh	head 5	cell 1	head 5cell 1	10	90.345	582.903	290.644	152.871	2051.811	73.266	1
apkc_sibling_Ecad-mCh	Ecad-mCh	head 5	cell 1	head 5cell 1	11	90.345	585.243	296.721	147.078	2222.076	73.266	1
apkc_sibling_Ecad-mCh	Ecad-mCh	head 5	cell 1	head 5cell 1	12	90.345	556.25	288.063	147.938	2195.148	73.266	1
apkc_sibling_Ecad-mCh	Ecad-mCh	head 5	cell 1	head 5cell 1	13	85.806	509.299	252.104	149.594	2106.689	69.577	1
apkc_sibling_Ecad-mCh	Ecad-mCh	head 5	cell 1	head 5cell 1	14	64.625	485.821	227.086	148.311	2197.819	52.361	1
apkc_sibling_Ecad-mCh	Ecad-mCh	head 5	cell 1	head 5cell 1	15	64.625	442.457	210.136	149.853	1518.69	52.361	1
apkc_sibling_Ecad-mCh	Ecad-mCh	head 5	cell 1	head 5cell 1	16	28.314	493.886	202.257	166.963	1596.221	22.842	1
apkc_sibling_Ecad-mCh	Ecad-mCh	head 5		head 5								1
apkc_sibling_Ecad-mCh	Ecad-mCh	head 5	cell 2	head 5cell 2	1	88.184	245.799	96.543	144.257	1074.978	71.51	1
apkc_sibling_Ecad-mCh	Ecad-mCh	head 5	cell 2	head 5cell 2	2	88.184	273.172	129.001	144.289	1275.627	71.51	1
apkc_sibling_Ecad-mCh	Ecad-mCh	head 5	cell 2	head 5cell 2	3	88.184	311.327	157.782	144.704	1456.394	71.51	1
apkc_sibling_Ecad-mCh	Ecad-mCh	head 5	cell 2	head 5cell 2	4	88.184	333.061	176.052	142.047	2195.562	71.51	1
apkc_sibling_Ecad-mCh	Ecad-mCh	head 5	cell 2	head 5cell 2	5	88.184	349.43	169.984	141	1798.596	71.51	1
apkc_sibling_Ecad-mCh	Ecad-mCh	head 5	cell 2	head 5cell 2	6	88.184	358.878	184.906	141.171	1828.76	71.51	1
apkc_sibling_Ecad-mCh	Ecad-mCh	head 5	cell 2	head 5cell 2	7	89.481	430.522	208.545	146.747	2049.354	72.568	1
apkc_sibling_Ecad-mCh	Ecad-mCh	head 5	cell 2	head 5cell 2	8	89.481	426.938	199.382	148.611	2996.365	72.568	1
apkc_sibling_Ecad-mCh	Ecad-mCh	head 5	cell 2	head 5cell 2	9	89.481	408.996	201.49	142.969	3103.036	72.568	1
apkc_sibling_Ecad-mCh	Ecad-mCh	head 5	cell 2	head 5cell 2	10	56.844	416.262	202.506	137.631	2402.495	46.034	1
apkc_sibling_Ecad-mCh	Ecad-mCh	head 5	cell 2	head 5cell 2	11	56.844	368.674	193.988	149.759	2831.695	46.034	1
apkc_sibling_Ecad-mCh	Ecad-mCh	head 5		head 5								1
apkc_sibling_Ecad-mCh	Ecad-mCh	head 5	cell 3	head 5cell 3	1	104.394	220.144	87.193	143.884	1614.351	84.688	1
apkc_sibling_Ecad-mCh	Ecad-mCh	head 5	cell 3	head 5cell 3	2	104.394	246.322	96.929	135.727	1041.589	84.688	1
apkc_sibling_Ecad-mCh	Ecad-mCh	head 5	cell 3	head 5cell 3	3	104.394	283.185	122.993	133.811	1340.804	84.688	1
apkc_sibling_Ecad-mCh	Ecad-mCh	head 5	cell 3	head 5cell 3	4	104.394	306.836	146.652	138.98	1582.132	84.688	1
apkc_sibling_Ecad-mCh	Ecad-mCh	head 5	cell 3	head 5cell 3	5	107.852	333.955	164.563	142.381	1858.722	87.502	1
apkc_sibling_Ecad-mCh	Ecad-mCh	head 5	cell 3	head 5cell 3	6	107.852	351.926	159.888	142.961	1690.092	87.502	1
apkc_sibling_Ecad-mCh	Ecad-mCh	head 5	cell 3	head 5cell 3	7	46.253	423.782	172.376	149.91	1451.304	37.427	1
apkc_sibling_Ecad-mCh	Ecad-mCh	head 5	cell 3	head 5cell 3	8	108.501	396.301	194.539	145.395	2528.658	88.028	1
apkc_sibling_Ecad-mCh	Ecad-mCh	head 5	cell 3	head 5cell 3	9	46.037	483.001	190.535	153.422	1553.445	37.251	1
apkc_sibling_Ecad-mCh	Ecad-mCh	head 5	cell 3	head 5cell 3	10	46.037	522.057	209.948	168.167	1785.205	37.251	1
apkc_sibling_Ecad-mCh	Ecad-mCh	head 5	cell 3	head 5cell 3	11	46.469	526.511	198.626	153.641	1632.333	37.603	1
apkc_sibling_Ecad-mCh	Ecad-mCh	head 5	cell 3	head 5cell 3	12	46.469	499.284	172.291	172.122	1511.722	37.603	1
apkc_sibling_Ecad-mCh	Ecad-mCh	head 5	cell 3	head 5cell 3	13	27.233	529.747	190.626	185.421	1356.696	21.964	1
apkc_sibling_Ecad-mCh	Ecad-mCh	head 5	cell 3	head 5cell 3	14	17.075	531.728	222.195	178.595	1670.933	13.706	1
apkc_sibling_Ecad-mCh	Ecad-mCh	head 5	cell 3	head 5cell 3	15	18.155	519.767	191.576	156.01	1261.953	14.584	1
apkc_sibling_Ecad-mCh	Ecad-mCh											1
apkc_sibling_Ecad-mCh	Ecad-mCh	head 6	cell 1	head 6cell 1	1	100.504	250.161	77.279	141.271	688.498	81.529	1
apkc_sibling_Ecad-mCh	Ecad-mCh	head 6	cell 1	head 6cell 1	2	100.504	269.395	93.166	138.896	733.165	81.529	1
apkc_sibling_Ecad-mCh	Ecad-mCh	head 6	cell 1	head 6cell 1	3	100.504	347.139	152.02	145.675	1138.973	81.53	1
apkc_sibling_Ecad-mCh	Ecad-mCh	head 6	cell 1	head 6cell 1	4	100.504	486.435	302.044	141.444	2092.557	81.53	1
apkc_sibling_Ecad-mCh	Ecad-mCh	head 6	cell 1	head 6cell 1	5	101.584	633.953	414.644	158.206	3003.177	82.407	1
apkc_sibling_Ecad-mCh	Ecad-mCh	head 6	cell 1	head 6cell 1	6	101.584	781.107	498.106	150.077	3614.081	82.407	1
apkc_sibling_Ecad-mCh	Ecad-mCh	head 6	cell 1	head 6cell 1	7	99.639	975.297	565.388	179.012	3903.297	80.824	1
apkc_sibling_Ecad-mCh	Ecad-mCh	head 6	cell 1	head 6cell 1	8	99.639	1014.858	569.531	180.335	4006.052	80.824	1
apkc_sibling_Ecad-mCh	Ecad-mCh	head 6	cell 1	head 6cell 1	9	99.639	1051.082	595.845	192.996	4056.163	80.824	1
apkc_sibling_Ecad-mCh	Ecad-mCh	head 6	cell 1	head 6cell 1	10	100.936	1138.138	599.253	202.459	3787.451	81.881	1
apkc_sibling_Ecad-mCh	Ecad-mCh	head 6	cell 1	head 6cell 1	11	100.504	1183.839	605.569	169.662	3780.552	81.53	1
apkc_sibling_Ecad-mCh	Ecad-mCh	head 6	cell 1	head 6cell 1	12	100.504	1183.839	605.569	169.662	3780.552	81.53	1
apkc_sibling_Ecad-mCh	Ecad-mCh	head 6	cell 1	head 6cell 1	13	101.584	1206.273	624.892	247.99	3863.837	82.408	1
apkc_sibling_Ecad-mCh	Ecad-mCh	head 6	cell 1	head 6cell 1	14	100.72	1159.26	592.925	249.992	4092.017	81.705	1
apkc_sibling_Ecad-mCh	Ecad-mCh	head 6	cell 1	head 6cell 1	15	103.53	1092.158	512.142	227.881	3783.815	83.981	1
apkc_sibling_Ecad-mCh	Ecad-mCh	head 6	cell 1	head 6cell 1	16	83.429	974.167	492.858	208.573	3458.46	67.649	1
apkc_sibling_Ecad-mCh	Ecad-mCh	head 6	cell 1	head 6cell 1	17	54.034	950.056	466.304	224.45	3589.885	43.74	1
apkc_sibling_Ecad-mCh	Ecad-mCh	head 6	cell 1	head 6cell 1	18	17.723	1129.608	517.907	283.4	3600.822	14.233	1
apkc_sibling_Ecad-mCh	Ecad-mCh	head 6	cell 1	head 6cell 1	19	17.723	1091.438	483.261	191.955	3196.541	14.233	1
apkc_sibling_Ecad-mCh	Ecad-mCh	head 6	cell 1	head 6cell 1	20	18.588	1059.887	449.803	291.085	3189.352	14.936	1
apkc_sibling_Ecad-mCh	Ecad-mCh	head 6	cell 1	head 6cell 1	21	16.859	1027.538	387.587	346.944	2376.698	13.53	1
apkc_sibling_Ecad-mCh	Ecad-mCh	head 6		head 6								1
apkc_sibling_Ecad-mCh	Ecad-mCh	head 6	cell 2	head 6cell 2	1	50.792	324.995	156.891	135.073	1196.556	41.11	1
apkc_sibling_Ecad-mCh	Ecad-mCh	head 6	cell 2	head 6cell 2	2	50.792	450.397	305.804	135.739	1969.307	41.11	1
apkc_sibling_Ecad-mCh	Ecad-mCh	head 6	cell 2	head 6cell 2	3	50.792	538.974	402.848	150.422	3084.986	41.11	1
apkc_sibling_Ecad-mCh	Ecad-mCh	head 6	cell 2	head 6cell 2	4	50.792	620.444	446.282	146.562	3468.134	41.11	1
apkc_sibling_Ecad-mCh	Ecad-mCh	head 6	cell 2	head 6cell 2	5	108.717	618.404	494.437	142.065	3589.999	88.2	1
apkc_sibling_Ecad-mCh	Ecad-mCh	head 6	cell 2	head 6cell 2	6	108.717	686.279	479.413	146.398	3814.857	88.2	1
apkc_sibling_Ecad-mCh	Ecad-mCh	head 6	cell 2	head 6cell 2	7	108.717	728.982	492.982	147.994	4012.76	88.2	1
apkc_sibling_Ecad-mCh	Ecad-mCh	head 6	cell 2	head 6cell 2	8	110.014	840.856	522.344	149.669	3932.81	89.255	1
apkc_sibling_Ecad-mCh	Ecad-mCh	head 6	cell 2	head 6cell 2	9	109.797	962.239	552.243	150.221	3806.559	89.078	1
apkc_sibling_Ecad-mCh	Ecad-mCh	head 6	cell 2	head 6cell 2	10	105.475	1048.667	530.546	177.99	3572.354	85.569	1
apkc_sibling_Ecad-mCh	Ecad-mCh	head 6	cell 2	head 6cell 2	11	106.772	1063.16	546.139	170.15	3696.061	86.624	1
apkc_sibling_Ecad-mCh	Ecad-mCh	head 6	cell 2	head 6cell 2	12	106.772	972.48	502.53	183.741	4049.04	86.624	1
apkc_sibling_Ecad-mCh	Ecad-mCh	head 6	cell 2	head 6cell 2	13	74.783	945.396	527.73	160.963	3858.503	60.619	1
apkc_sibling_Ecad-mCh	Ecad-mCh	head 6	cell 2	head 6cell 2	14	74.783	890.599	498.721	189.4	3525.086	60.619	1
apkc_sibling_Ecad-mCh	Ecad-mCh	head 6	cell 2	head 6cell 2	15	39.337	989.635	592.395	190.065	3519.801	31.804	1
apkc_sibling_Ecad-mCh	Ecad-mCh	head 6	cell 2	head 6cell 2	16	39.337	961.828	533.307	164.782	3042.799	31.804	1
apkc_sibling_Ecad-mCh	Ecad-mCh	head 6	cell 2	head 6cell 2	17	37.824	947.567	494.072	205.306	3052.459	30.574	1
apkc_sibling_Ecad-mCh	Ecad-mCh	head 6	cell 2	head 6cell 2	18	37.824	771.382	320.797	249.678	2165.325	30.574	1
apkc_sibling_Ecad-mCh	Ecad-mCh	head 6		head 6								1
apkc_sibling_Ecad-mCh	Ecad-mCh	head 6	cell 3	head 6cell 3	1	57.492	262.558	85.846	144.015	770.494	46.562	1
apkc_sibling_Ecad-mCh	Ecad-mCh	head 6	cell 3	head 6cell 3	2	57.492	291.662	117.045	147.157	863.683	46.562	1
apkc_sibling_Ecad-mCh	Ecad-mCh	head 6	cell 3	head 6cell 3	3	57.492	321.344	172.586	145.003	1492.303	46.562	1
apkc_sibling_Ecad-mCh	Ecad-mCh	head 6	cell 3	head 6cell 3	4	57.276	561.524	364.981	143.685	2978.053	46.387	1
apkc_sibling_Ecad-mCh	Ecad-mCh	head 6	cell 3	head 6cell 3	5	57.276	657.269	435.968	150.015	3281.063	46.387	1
apkc_sibling_Ecad-mCh	Ecad-mCh	head 6	cell 3	head 6cell 3	6	86.671	629.591	468.235	147.104	3916.79	70.283	1
apkc_sibling_Ecad-mCh	Ecad-mCh	head 6	cell 3	head 6cell 3	7	86.671	736.841	540.365	145.073	3807.87	70.283	1
apkc_sibling_Ecad-mCh	Ecad-mCh	head 6	cell 3	head 6cell 3	8	86.887	854.862	542.065	141.802	3920.626	70.457	1
apkc_sibling_Ecad-mCh	Ecad-mCh	head 6	cell 3	head 6cell 3	9	87.752	937.427	547.622	150.469	3615.323	71.16	1
apkc_sibling_Ecad-mCh	Ecad-mCh	head 6	cell 3	head 6cell 3	10	88.184	954.925	556.139	0	3826.722	71.512	1
apkc_sibling_Ecad-mCh	Ecad-mCh	head 6	cell 3	head 6cell 3	11	87.968	1060.598	535.749	0	3144.46	71.336	1
apkc_sibling_Ecad-mCh	Ecad-mCh	head 6	cell 3	head 6cell 3	12	87.968	976.491	529.102	0	3379.162	71.336	1
apkc_sibling_Ecad-mCh	Ecad-mCh	head 6	cell 3	head 6cell 3	13	88.616	938.53	478.844	0	3456.104	71.865	1
apkc_sibling_Ecad-mCh	Ecad-mCh	head 6	cell 3	head 6cell 3	14	74.567	844.349	427.937	0	3617.447	60.444	1
apkc_sibling_Ecad-mCh	Ecad-mCh	head 6	cell 3	head 6cell 3	15	33.069	949.168	442.085	0	3440.757	26.707	1
apkc_sibling_Ecad-mCh	Ecad-mCh	head 6	cell 3	head 6cell 3	16	33.069	930.798	435.438	0	3162.759	26.707	1
apkc_sibling_Ecad-mCh	Ecad-mCh	head 6	cell 3	head 6cell 3	17	32.637	822.388	342.352	0	2553.383	26.357	1
apkc_sibling_Ecad-mCh	Ecad-mCh											1
apkc_sibling_Ecad-mCh	Ecad-mCh	head 7	cell 1	head 7cell 1	1	95.749	247.655	91.838	137.809	965.438	77.662	1
apkc_sibling_Ecad-mCh	Ecad-mCh	head 7	cell 1	head 7cell 1	2	94.236	311.756	150.427	139.325	1408.215	76.431	1
apkc_sibling_Ecad-mCh	Ecad-mCh	head 7	cell 1	head 7cell 1	3	94.236	320.118	161.239	136.357	1511.383	76.431	1
apkc_sibling_Ecad-mCh	Ecad-mCh	head 7	cell 1	head 7cell 1	4	94.668	366.073	183.348	139.802	1829.809	76.781	1
apkc_sibling_Ecad-mCh	Ecad-mCh	head 7	cell 1	head 7cell 1	5	95.532	357.845	189.301	133.513	1584.078	77.489	1
apkc_sibling_Ecad-mCh	Ecad-mCh	head 7	cell 1	head 7cell 1	6	95.316	378.185	189.839	134.255	1847.988	77.314	1
apkc_sibling_Ecad-mCh	Ecad-mCh	head 7	cell 1	head 7cell 1	7	95.316	361.404	190.705	149.451	1707.606	77.314	1
apkc_sibling_Ecad-mCh	Ecad-mCh	head 7	cell 1	head 7cell 1	8	96.829	397.423	192.289	147.13	1393.822	78.544	1
apkc_sibling_Ecad-mCh	Ecad-mCh	head 7	cell 1	head 7cell 1	9	96.829	401.718	189.419	139.669	1425.016	78.544	1
apkc_sibling_Ecad-mCh	Ecad-mCh	head 7	cell 1	head 7cell 1	10	96.829	385.016	168.104	136.259	1476.939	78.544	1
apkc_sibling_Ecad-mCh	Ecad-mCh	head 7	cell 1	head 7cell 1	11	96.829	374.925	152.477	145.694	1182.483	78.544	1
apkc_sibling_Ecad-mCh	Ecad-mCh	head 7	cell 1	head 7cell 1	12	98.775	393.387	141.441	140.271	1202.801	80.124	1
apkc_sibling_Ecad-mCh	Ecad-mCh	head 7	cell 1	head 7cell 1	13	78.458	362.958	135.148	148.525	1096.417	63.608	1
apkc_sibling_Ecad-mCh	Ecad-mCh	head 7	cell 1	head 7cell 1	14	37.176	375.069	129.127	145.717	1087.047	30.047	1
apkc_sibling_Ecad-mCh	Ecad-mCh	head 7	cell 1	head 7cell 1	15	33.933	389.339	126.868	154.254	848.277	27.412	1
apkc_sibling_Ecad-mCh	Ecad-mCh											1
apkc_sibling_Ecad-mCh	Ecad-mCh	head 1	cell 1	head 1cell 1	1	86.455	212.593	70.075	135.053	755.321	70.107	1
apkc_mutant_Ecad-mCh	Ecad-mCh	head 1	cell 1	head 1cell 1	2	95.532	239.182	97.756	135.807	929.899	77.488	1
apkc_mutant_Ecad-mCh	Ecad-mCh	head 1	cell 1	head 1cell 1	3	95.532	267.79	114.9	138.992	948.699	77.488	1
apkc_mutant_Ecad-mCh	Ecad-mCh	head 1	cell 1	head 1cell 1	4	96.181	293.214	121.517	137.553	1221.382	78.013	1
apkc_mutant_Ecad-mCh	Ecad-mCh	head 1	cell 1	head 1cell 1	5	96.181	343.817	165.673	142.422	1923.39	78.013	1
apkc_mutant_Ecad-mCh	Ecad-mCh	head 1	cell 1	head 1cell 1	6	96.829	395.318	191.24	141.99	1803.238	78.496	1
apkc_mutant_Ecad-mCh	Ecad-mCh	head 1	cell 1	head 1cell 1	7	96.829	427.348	208.418	141.1	2012.502	78.496	1
apkc_mutant_Ecad-mCh	Ecad-mCh	head 1	cell 1	head 1cell 1	8	96.829	477.299	244.575	146.526	3021.294	78.496	1
apkc_mutant_Ecad-mCh	Ecad-mCh	head 1	cell 1	head 1cell 1	9	44.308	490.06	202.165	156.253	2508.537	35.845	1
apkc_mutant_Ecad-mCh	Ecad-mCh	head 1	cell 1	head 1cell 1	10	32.204	520.127	212.075	165.912	1996.018	26.006	1
apkc_mutant_Ecad-mCh	Ecad-mCh											1
apkc_mutant_Ecad-mCh	Ecad-mCh	head 2	cell 1	head 2cell 1	1	88.832	257.7	97.74	139.542	786.566	72.039	1
apkc_mutant_Ecad-mCh	Ecad-mCh	head 2	cell 1	head 2cell 1	2	88.832	334.67	187.974	123.908	1517.009	72.039	1
apkc_mutant_Ecad-mCh	Ecad-mCh	head 2	cell 1	head 2cell 1	3	88.832	490.372	393.504	143.144	2849.137	72.039	1
apkc_mutant_Ecad-mCh	Ecad-mCh	head 2	cell 1	head 2cell 1	4	88.832	629.272	567.229	142.28	4052.644	72.039	1
apkc_mutant_Ecad-mCh	Ecad-mCh	head 2	cell 1	head 2cell 1	5	87.103	748.052	588.372	136.145	4065.637	70.633	1
apkc_mutant_Ecad-mCh	Ecad-mCh	head 2	cell 1	head 2cell 1	6	87.103	815.458	588.317	148.642	4067.822	70.633	1
apkc_mutant_Ecad-mCh	Ecad-mCh	head 2	cell 1	head 2cell 1	7	87.103	821.166	600.215	151.97	4029.898	70.633	1
apkc_mutant_Ecad-mCh	Ecad-mCh	head 2	cell 1	head 2cell 1	8	85.59	917.79	643.412	148.046	3988.42	69.406	1
apkc_mutant_Ecad-mCh	Ecad-mCh	head 2	cell 1	head 2cell 1	9	85.158	936.527	607.204	147.386	3908.525	69.054	1
apkc_mutant_Ecad-mCh	Ecad-mCh	head 2	cell 1	head 2cell 1	10	84.726	945.33	593.01	154.884	3764.747	68.703	1
apkc_mutant_Ecad-mCh	Ecad-mCh	head 2	cell 1	head 2cell 1	11	84.726	901.777	544.229	150.985	4003.056	68.703	1
apkc_mutant_Ecad-mCh	Ecad-mCh	head 2	cell 1	head 2cell 1	12	84.726	808.439	490.994	155.335	3866.986	68.703	1
apkc_mutant_Ecad-mCh	Ecad-mCh	head 2	cell 1	head 2cell 1	13	35.23	904.673	551.175	170.905	3475.269	28.466	1
apkc_mutant_Ecad-mCh	Ecad-mCh	head 2	cell 1	head 2cell 1	14	29.395	713.542	482.12	169.828	3232.159	23.721	1
apkc_mutant_Ecad-mCh	Ecad-mCh	head 2	cell 1	head 2cell 1	15	17.075	845.452	401.23	206.045	2264.219	13.705	1
apkc_mutant_Ecad-mCh	Ecad-mCh	head 2		head 2								1
apkc_mutant_Ecad-mCh	Ecad-mCh	head 2	cell 2	head 2cell 2	1	74.567	230.508	63.083	134.252	684.878	60.444	1
apkc_mutant_Ecad-mCh	Ecad-mCh	head 2	cell 2	head 2cell 2	2	74.567	273.461	97.853	139.068	772.997	60.444	1
apkc_mutant_Ecad-mCh	Ecad-mCh	head 2	cell 2	head 2cell 2	3	74.567	366.17	192.578	145.217	1568.033	60.444	1
apkc_mutant_Ecad-mCh	Ecad-mCh	head 2	cell 2	head 2cell 2	4	74.567	554.789	400.173	148.669	3277.136	60.444	1
apkc_mutant_Ecad-mCh	Ecad-mCh	head 2	cell 2	head 2cell 2	5	74.567	721.124	536.071	144.738	4037.48	60.444	1
apkc_mutant_Ecad-mCh	Ecad-mCh	head 2	cell 2	head 2cell 2	6	74.567	756.712	497.168	148.151	3787.23	60.444	1
apkc_mutant_Ecad-mCh	Ecad-mCh	head 2	cell 2	head 2cell 2	7	77.161	784.771	500.409	152.702	4084.287	62.551	1
apkc_mutant_Ecad-mCh	Ecad-mCh	head 2	cell 2	head 2cell 2	8	77.161	828.135	511.545	148.541	4038.335	62.551	1
apkc_mutant_Ecad-mCh	Ecad-mCh	head 2	cell 2	head 2cell 2	9	78.674	857.126	539.829	166.116	3947.475	63.781	1
apkc_mutant_Ecad-mCh	Ecad-mCh	head 2	cell 2	head 2cell 2	10	78.674	989.147	625.886	159.8	3505.291	63.781	1
apkc_mutant_Ecad-mCh	Ecad-mCh	head 2	cell 2	head 2cell 2	11	78.674	978.719	611.598	149.424	3564.478	63.781	1
apkc_mutant_Ecad-mCh	Ecad-mCh	head 2	cell 2	head 2cell 2	12	78.674	920.827	556.64	162.259	3406.661	63.781	1
apkc_mutant_Ecad-mCh	Ecad-mCh	head 2	cell 2	head 2cell 2	13	78.674	812.766	408.558	188.831	3083.699	63.781	1
apkc_mutant_Ecad-mCh	Ecad-mCh	head 2	cell 2	head 2cell 2	14	38.04	785.974	333.17	182.72	2145.669	30.75	1
apkc_mutant_Ecad-mCh	Ecad-mCh	head 2	cell 2	head 2cell 2	15	36.743	681.039	242.349	173.843	1695.583	29.695	1
apkc_mutant_Ecad-mCh	Ecad-mCh	head 2	cell 2	head 2cell 2	16	18.588	605.929	232.717	160.427	1682.732	14.936	1
apkc_mutant_Ecad-mCh	Ecad-mCh	head 2	cell 2	head 2cell 2	17	17.507	530.904	168.774	183.261	1438.34	14.057	1
apkc_mutant_Ecad-mCh	Ecad-mCh	head 2		head 2								1
apkc_mutant_Ecad-mCh	Ecad-mCh	head 2	cell 3	head 2cell 3	1	51.441	266.935	101.277	146.444	837.841	41.643	1
apkc_mutant_Ecad-mCh	Ecad-mCh	head 2	cell 3	head 2cell 3	2	51.441	356.769	186.042	136.96	1329.742	41.643	1
apkc_mutant_Ecad-mCh	Ecad-mCh	head 2	cell 3	head 2cell 3	3	77.593	451.799	346.974	144.953	2515.979	62.904	1
apkc_mutant_Ecad-mCh	Ecad-mCh	head 2	cell 3	head 2cell 3	4	77.593	611.996	520.587	146.752	3673.022	62.904	1
apkc_mutant_Ecad-mCh	Ecad-mCh	head 2	cell 3	head 2cell 3	5	77.593	693.859	534.78	146.394	4069.24	62.904	1
apkc_mutant_Ecad-mCh	Ecad-mCh	head 2	cell 3	head 2cell 3	6	77.161	767.67	537.359	150.792	4040.784	62.553	1
apkc_mutant_Ecad-mCh	Ecad-mCh	head 2	cell 3	head 2cell 3	7	76.512	833.484	582.954	148.988	4039.351	62.026	1
apkc_mutant_Ecad-mCh	Ecad-mCh	head 2	cell 3	head 2cell 3	8	76.512	862.102	612.489	156.126	3830.739	62.026	1
apkc_mutant_Ecad-mCh	Ecad-mCh	head 2	cell 3	head 2cell 3	9	76.945	887.935	592.428	0	3736.812	62.377	1
apkc_mutant_Ecad-mCh	Ecad-mCh	head 2	cell 3	head 2cell 3	10	76.945	886.771	529.922	0	3355.806	62.377	1
apkc_mutant_Ecad-mCh	Ecad-mCh	head 2	cell 3	head 2cell 3	11	76.945	858.977	471.19	0	2973.319	62.377	1
apkc_mutant_Ecad-mCh	Ecad-mCh	head 2	cell 3	head 2cell 3	12	76.945	752.575	378.474	0	2488.154	62.377	1
apkc_mutant_Ecad-mCh	Ecad-mCh	head 2	cell 3	head 2cell 3	13	34.798	812.831	440.295	0	2682.085	28.113	1
apkc_mutant_Ecad-mCh	Ecad-mCh	head 2	cell 3	head 2cell 3	14	29.395	805.693	474.055	0	2891.721	23.721	1
apkc_mutant_Ecad-mCh	Ecad-mCh	head 2	cell 3	head 2cell 3	15	29.827	714.397	424.931	0	2365.652	24.068	1
apkc_mutant_Ecad-mCh	Ecad-mCh	head 2	cell 3	head 2cell 3	16	23.559	780.36	365.359	0	2019.74	18.973	1
apkc_mutant_Ecad-mCh	Ecad-mCh	head 2	cell 3	head 2cell 3	17	10.375	782.943	295.334	0	1736.394	8.259	1
apkc_mutant_Ecad-mCh	Ecad-mCh	head 2	cell 3	head 2cell 3	18	14.265	762.347	304.572	0	1784.437	11.421	1
apkc_mutant_Ecad-mCh	Ecad-mCh	head 2	cell 3	head 2cell 3	19	9.078	787.542	261.228	270.132	1674.639	7.204	1
apkc_mutant_Ecad-mCh	Ecad-mCh	head 2	cell 3	head 2cell 3	20	9.078	787.542	261.228	270.132	1674.639	7.204	1
apkc_mutant_Ecad-mCh	Ecad-mCh	head 2		head 2								1
apkc_mutant_Ecad-mCh	Ecad-mCh	head 2	cell 4	head 2cell 4	1	82.564	250.451	75.311	135.613	857.673	66.946	1
apkc_mutant_Ecad-mCh	Ecad-mCh	head 2	cell 4	head 2cell 4	2	82.564	302.351	118.495	139.999	948.675	66.946	1
apkc_mutant_Ecad-mCh	Ecad-mCh	head 2	cell 4	head 2cell 4	3	82.564	424.023	230.291	142.943	1597.752	66.946	1
apkc_mutant_Ecad-mCh	Ecad-mCh	head 2	cell 4	head 2cell 4	4	82.564	650.906	489.25	144.916	3004.636	66.946	1
apkc_mutant_Ecad-mCh	Ecad-mCh	head 2	cell 4	head 2cell 4	5	82.564	796.608	616.42	148.024	3963.129	66.946	1
apkc_mutant_Ecad-mCh	Ecad-mCh	head 2	cell 4	head 2cell 4	6	83.645	923.78	616.4	150.271	4023.108	67.823	1
apkc_mutant_Ecad-mCh	Ecad-mCh	head 2	cell 4	head 2cell 4	7	83.645	931.352	638.758	167.895	4093.886	67.823	1
apkc_mutant_Ecad-mCh	Ecad-mCh	head 2	cell 4	head 2cell 4	8	83.645	943.599	663.688	154.141	4087.724	67.823	1
apkc_mutant_Ecad-mCh	Ecad-mCh	head 2	cell 4	head 2cell 4	9	82.564	1071.441	656.193	182.931	4086.12	66.944	1
apkc_mutant_Ecad-mCh	Ecad-mCh	head 2	cell 4	head 2cell 4	10	82.564	1133.537	664.458	211.709	3801.864	66.944	1
apkc_mutant_Ecad-mCh	Ecad-mCh	head 2	cell 4	head 2cell 4	11	82.564	1084.425	595.631	199.222	3458.1	66.944	1
apkc_mutant_Ecad-mCh	Ecad-mCh	head 2	cell 4	head 2cell 4	12	82.564	937.342	479.238	161.461	3043.325	66.944	1
apkc_mutant_Ecad-mCh	Ecad-mCh	head 2	cell 4	head 2cell 4	13	64.625	827.731	368.735	202.905	2560.489	52.362	1
apkc_mutant_Ecad-mCh	Ecad-mCh	head 2	cell 4	head 2cell 4	14	13.617	863.016	317.557	210.36	2594.93	10.894	1
apkc_mutant_Ecad-mCh	Ecad-mCh	head 2	cell 4	head 2cell 4	15	11.671	795.166	293.765	195.8	1771.699	9.313	1
apkc_mutant_Ecad-mCh	Ecad-mCh	head 2	cell 4	head 2cell 4	16	7.133	804.535	248.247	218.342	1887.153	5.623	1
apkc_mutant_Ecad-mCh	Ecad-mCh	head 2		head 2								1
apkc_mutant_Ecad-mCh	Ecad-mCh	head 2	cell 5	head 2cell 5	1	86.887	256.14	78.649	142.045	877.149	70.459	1
apkc_mutant_Ecad-mCh	Ecad-mCh	head 2	cell 5	head 2cell 5	2	86.887	319.481	128.92	135.126	1108.6	70.459	1
apkc_mutant_Ecad-mCh	Ecad-mCh	head 2	cell 5	head 2cell 5	3	86.887	468.773	283.164	143.033	2511.607	70.459	1
apkc_mutant_Ecad-mCh	Ecad-mCh	head 2	cell 5	head 2cell 5	4	86.887	717.825	573.5	134.794	4016.057	70.459	1
apkc_mutant_Ecad-mCh	Ecad-mCh	head 2	cell 5	head 2cell 5	5	86.887	846.157	667.169	141.004	4091.78	70.459	1
apkc_mutant_Ecad-mCh	Ecad-mCh	head 2	cell 5	head 2cell 5	6	86.887	852.827	615.618	153.017	4095	70.459	1
apkc_mutant_Ecad-mCh	Ecad-mCh	head 2	cell 5	head 2cell 5	7	87.535	900.443	637.017	152.383	4042.604	70.986	1
apkc_mutant_Ecad-mCh	Ecad-mCh	head 2	cell 5	head 2cell 5	8	87.535	928.605	652.171	155.298	4081.123	70.986	1
apkc_mutant_Ecad-mCh	Ecad-mCh	head 2	cell 5	head 2cell 5	9	87.535	1054.687	711.268	174.336	3911.133	70.987	1
apkc_mutant_Ecad-mCh	Ecad-mCh	head 2	cell 5	head 2cell 5	10	87.535	1087.312	686.352	164.84	3866.899	70.987	1
apkc_mutant_Ecad-mCh	Ecad-mCh	head 2	cell 5	head 2cell 5	11	87.535	1025.157	611.196	161.894	3561.765	70.987	1
apkc_mutant_Ecad-mCh	Ecad-mCh	head 2	cell 5	head 2cell 5	12	87.535	919.687	502.284	180.342	3150.827	70.987	1
apkc_mutant_Ecad-mCh	Ecad-mCh	head 2	cell 5	head 2cell 5	13	62.68	805.233	409.168	180.991	2958.896	50.781	1
apkc_mutant_Ecad-mCh	Ecad-mCh	head 2	cell 5	head 2cell 5	14	12.104	798.464	311.19	291.28	1927.046	9.664	1
apkc_mutant_Ecad-mCh	Ecad-mCh	head 2		head 2								1
apkc_mutant_Ecad-mCh	Ecad-mCh	head 2	cell 6	head 2cell 6	1	87.103	236.803	74.761	140.949	1261.879	70.634	1
apkc_mutant_Ecad-mCh	Ecad-mCh	head 2	cell 6	head 2cell 6	2	87.103	271.325	102.221	138.676	913.183	70.634	1
apkc_mutant_Ecad-mCh	Ecad-mCh	head 2	cell 6	head 2cell 6	3	87.103	376.213	218.073	140.552	1708.263	70.634	1
apkc_mutant_Ecad-mCh	Ecad-mCh	head 2	cell 6	head 2cell 6	4	83.861	608.112	439.324	145.424	3244.449	67.998	1
apkc_mutant_Ecad-mCh	Ecad-mCh	head 2	cell 6	head 2cell 6	5	83.861	823.862	640.65	140.736	4062.586	67.998	1
apkc_mutant_Ecad-mCh	Ecad-mCh	head 2	cell 6	head 2cell 6	6	83.861	880.168	648.396	151.791	4095	67.998	1
apkc_mutant_Ecad-mCh	Ecad-mCh	head 2	cell 6	head 2cell 6	7	83.861	898.435	617.678	154.782	4019.468	67.998	1
apkc_mutant_Ecad-mCh	Ecad-mCh	head 2	cell 6	head 2cell 6	8	83.861	921.2	637.606	151.947	4042.854	67.998	1
apkc_mutant_Ecad-mCh	Ecad-mCh	head 2	cell 6	head 2cell 6	9	85.374	1060.755	681.115	172.938	4016.41	69.23	1
apkc_mutant_Ecad-mCh	Ecad-mCh	head 2	cell 6	head 2cell 6	10	85.374	1164.242	706.136	170.739	3781.697	69.23	1
apkc_mutant_Ecad-mCh	Ecad-mCh	head 2	cell 6	head 2cell 6	11	85.374	1133.567	659.516	193.453	3781.771	69.23	1
apkc_mutant_Ecad-mCh	Ecad-mCh	head 2	cell 6	head 2cell 6	12	85.374	975.299	510.787	169.231	3328.041	69.23	1
apkc_mutant_Ecad-mCh	Ecad-mCh	head 2	cell 6	head 2cell 6	13	53.17	816.681	447.376	191.785	3182.604	43.05	1
apkc_mutant_Ecad-mCh	Ecad-mCh	head 2	cell 6	head 2cell 6	14	6.916	985.889	413.975	318.12	2116.256	5.447	1
apkc_mutant_Ecad-mCh	Ecad-mCh	head 2		head 2								1
apkc_mutant_Ecad-mCh	Ecad-mCh	head 2	cell 7	head 2cell 7	1	80.187	241.033	71.508	140.307	592.927	65.01	1
apkc_mutant_Ecad-mCh	Ecad-mCh	head 2	cell 7	head 2cell 7	2	80.187	307.621	137.932	142.724	1348.763	65.01	1
apkc_mutant_Ecad-mCh	Ecad-mCh	head 2	cell 7	head 2cell 7	3	80.187	450.344	295.36	136.718	2402.366	65.01	1
apkc_mutant_Ecad-mCh	Ecad-mCh	head 2	cell 7	head 2cell 7	4	80.187	699.159	535.755	140.154	3786.383	65.011	1
apkc_mutant_Ecad-mCh	Ecad-mCh	head 2	cell 7	head 2cell 7	5	80.187	831.737	632.831	138.844	4090.918	65.011	1
apkc_mutant_Ecad-mCh	Ecad-mCh	head 2	cell 7	head 2cell 7	6	80.187	871.23	639.406	154.813	4069.606	65.011	1
apkc_mutant_Ecad-mCh	Ecad-mCh	head 2	cell 7	head 2cell 7	7	80.187	860.965	637.513	149	4080.305	65.011	1
apkc_mutant_Ecad-mCh	Ecad-mCh	head 2	cell 7	head 2cell 7	8	80.187	858.39	633.863	153.489	3992.69	65.011	1
apkc_mutant_Ecad-mCh	Ecad-mCh	head 2	cell 7	head 2cell 7	9	81.051	1055.045	676.118	187.911	4040.207	65.709	1
apkc_mutant_Ecad-mCh	Ecad-mCh	head 2	cell 7	head 2cell 7	10	81.051	1061.855	701.239	156.598	4055.402	65.709	1
apkc_mutant_Ecad-mCh	Ecad-mCh	head 2	cell 7	head 2cell 7	11	81.051	1062.033	712.052	169.921	4005.768	65.709	1
apkc_mutant_Ecad-mCh	Ecad-mCh	head 2	cell 7	head 2cell 7	12	81.051	980.721	626.494	176.249	3919.75	65.709	1
apkc_mutant_Ecad-mCh	Ecad-mCh	head 2	cell 7	head 2cell 7	13	81.051	887.269	552.928	161.909	3833.136	65.709	1
apkc_mutant_Ecad-mCh	Ecad-mCh	head 2	cell 7	head 2cell 7	14	45.821	935.23	561.794	201.244	3119.084	37.075	1
apkc_mutant_Ecad-mCh	Ecad-mCh	head 2	cell 7	head 2cell 7	15	23.127	944.259	440.129	225.129	2405.89	18.626	1
apkc_mutant_Ecad-mCh	Ecad-mCh											1
apkc_mutant_Ecad-mCh	Ecad-mCh	head 3	cell 1	head 3cell 1	1	111.094	215.37	63.273	137.484	636.409	90.136	1
apkc_mutant_Ecad-mCh	Ecad-mCh	head 3	cell 1	head 3cell 1	2	111.094	284.926	134.919	134.192	1182.907	90.136	1
apkc_mutant_Ecad-mCh	Ecad-mCh	head 3	cell 1	head 3cell 1	3	111.959	361.627	216.016	144.28	1736.523	90.839	1
apkc_mutant_Ecad-mCh	Ecad-mCh	head 3	cell 1	head 3cell 1	4	111.959	406.926	261.265	140.952	2785.925	90.839	1
apkc_mutant_Ecad-mCh	Ecad-mCh	head 3	cell 1	head 3cell 1	5	111.959	454.4	288.481	142.395	3514.476	90.839	1
apkc_mutant_Ecad-mCh	Ecad-mCh	head 3	cell 1	head 3cell 1	6	111.959	450.78	258.686	143.784	3025.594	90.839	1
apkc_mutant_Ecad-mCh	Ecad-mCh	head 3	cell 1	head 3cell 1	7	112.391	532.267	280.716	148.776	3033.014	91.192	1
apkc_mutant_Ecad-mCh	Ecad-mCh	head 3	cell 1	head 3cell 1	8	112.391	539.472	285.943	148.485	2996.706	91.192	1
apkc_mutant_Ecad-mCh	Ecad-mCh	head 3	cell 1	head 3cell 1	9	113.256	581.499	295.426	149.195	2177.138	91.897	1
apkc_mutant_Ecad-mCh	Ecad-mCh	head 3	cell 1	head 3cell 1	10	113.256	582.659	303.333	143.301	2118.418	91.897	1
apkc_mutant_Ecad-mCh	Ecad-mCh	head 3	cell 1	head 3cell 1	11	112.607	595.162	294.811	145.214	2330.672	91.37	1
apkc_mutant_Ecad-mCh	Ecad-mCh	head 3	cell 1	head 3cell 1	12	112.607	533.119	264.13	149	2280.675	91.37	1
apkc_mutant_Ecad-mCh	Ecad-mCh	head 3	cell 1	head 3cell 1	13	110.23	461.678	203.417	149.644	2859.392	89.438	1
apkc_mutant_Ecad-mCh	Ecad-mCh	head 3	cell 1	head 3cell 1	14	17.939	601.924	231.583	167.741	2048.054	14.409	1
apkc_mutant_Ecad-mCh	Ecad-mCh	head 3		head 3								1
apkc_mutant_Ecad-mCh	Ecad-mCh	head 3	cell 2	head 3cell 2	1	81.267	235.51	86.136	134.984	713.091	65.89	1
apkc_mutant_Ecad-mCh	Ecad-mCh	head 3	cell 2	head 3cell 2	2	81.267	290.054	146.402	140.558	1537.281	65.89	1
apkc_mutant_Ecad-mCh	Ecad-mCh	head 3	cell 2	head 3cell 2	3	81.267	331.171	192.19	139.701	1859.658	65.89	1
apkc_mutant_Ecad-mCh	Ecad-mCh	head 3	cell 2	head 3cell 2	4	81.267	365.253	211.294	143.213	1804.7	65.89	1
apkc_mutant_Ecad-mCh	Ecad-mCh	head 3	cell 2	head 3cell 2	5	81.267	384.574	216.751	142.661	1978.115	65.89	1
apkc_mutant_Ecad-mCh	Ecad-mCh	head 3	cell 2	head 3cell 2	6	81.051	391.357	207.579	145.105	2150.918	65.715	1
apkc_mutant_Ecad-mCh	Ecad-mCh	head 3	cell 2	head 3cell 2	7	81.051	415.382	209.652	149.031	2040.256	65.715	1
apkc_mutant_Ecad-mCh	Ecad-mCh	head 3	cell 2	head 3cell 2	8	81.051	450.702	219.252	131.55	1562.815	65.715	1
apkc_mutant_Ecad-mCh	Ecad-mCh	head 3	cell 2	head 3cell 2	9	81.051	450.871	213.873	149.228	1691.792	65.715	1
apkc_mutant_Ecad-mCh	Ecad-mCh	head 3	cell 2	head 3cell 2	10	79.754	473.095	208.199	146.436	1990.398	64.662	1
apkc_mutant_Ecad-mCh	Ecad-mCh	head 3	cell 2	head 3cell 2	11	79.754	436.696	183.37	147.696	1489.672	64.662	1
apkc_mutant_Ecad-mCh	Ecad-mCh	head 3	cell 2	head 3cell 2	12	77.593	416.638	171.846	147.797	1437.023	62.898	1
apkc_mutant_Ecad-mCh	Ecad-mCh	head 3	cell 2	head 3cell 2	13	60.086	393.355	145.01	149.738	1139.448	48.67	1
apkc_mutant_Ecad-mCh	Ecad-mCh	head 3		head 3								1
apkc_mutant_Ecad-mCh	Ecad-mCh	head 3	cell 3	head 3cell 3	1	81.7	211.231	63.766	138.501	629.223	66.243	1
apkc_mutant_Ecad-mCh	Ecad-mCh	head 3	cell 3	head 3cell 3	2	81.7	257.999	113.816	136.865	1368.85	66.243	1
apkc_mutant_Ecad-mCh	Ecad-mCh	head 3	cell 3	head 3cell 3	3	81.7	292.191	153.838	136.829	1991.541	66.243	1
apkc_mutant_Ecad-mCh	Ecad-mCh	head 3	cell 3	head 3cell 3	4	81.7	357.388	214.676	142.978	1727.928	66.243	1
apkc_mutant_Ecad-mCh	Ecad-mCh	head 3	cell 3	head 3cell 3	5	81.7	384.916	232.795	143.927	2209.729	66.243	1
apkc_mutant_Ecad-mCh	Ecad-mCh	head 3	cell 3	head 3cell 3	6	81.7	396.612	219.661	130.915	2350.242	66.243	1
apkc_mutant_Ecad-mCh	Ecad-mCh	head 3	cell 3	head 3cell 3	7	86.022	442.944	226.572	146.553	2079.046	69.755	1
apkc_mutant_Ecad-mCh	Ecad-mCh	head 3	cell 3	head 3cell 3	8	86.022	469.546	231.527	143.937	2375.134	69.755	1
apkc_mutant_Ecad-mCh	Ecad-mCh	head 3	cell 3	head 3cell 3	9	86.239	481.737	229.262	143.677	2164.24	69.93	1
apkc_mutant_Ecad-mCh	Ecad-mCh	head 3	cell 3	head 3cell 3	10	85.374	491.458	232.193	149	1932.538	69.229	1
apkc_mutant_Ecad-mCh	Ecad-mCh	head 3	cell 3	head 3cell 3	11	85.374	456.201	220.088	149.344	2545.571	69.229	1
apkc_mutant_Ecad-mCh	Ecad-mCh	head 3	cell 3	head 3cell 3	12	34.366	490.867	200.28	156.065	1954.366	27.761	1
apkc_mutant_Ecad-mCh	Ecad-mCh	head 3	cell 3	head 3cell 3	13	23.559	452.903	188.219	162.488	1331.321	18.976	1
apkc_mutant_Ecad-mCh	Ecad-mCh	head 3	cell 3	head 3cell 3	14	22.046	381.672	157.949	145.418	1199.124	17.746	1
apkc_mutant_Ecad-mCh	Ecad-mCh											1
apkc_mutant_Ecad-mCh	Ecad-mCh	head 4	cell 1	head 4cell 1	1	39.985	223.946	61.488	143.737	578.477	32.331	1
apkc_mutant_Ecad-mCh	Ecad-mCh	head 4	cell 1	head 4cell 1	2	39.985	337.525	150.607	148.944	1219.082	32.331	1
apkc_mutant_Ecad-mCh	Ecad-mCh	head 4	cell 1	head 4cell 1	3	72.406	337.846	160.442	140.515	1694.981	58.687	1
apkc_mutant_Ecad-mCh	Ecad-mCh	head 4	cell 1	head 4cell 1	4	72.406	378.136	181.394	146.848	1911.163	58.687	1
apkc_mutant_Ecad-mCh	Ecad-mCh	head 4	cell 1	head 4cell 1	5	72.406	425.975	193.367	149.776	1585.415	58.687	1
apkc_mutant_Ecad-mCh	Ecad-mCh	head 4	cell 1	head 4cell 1	6	72.406	478.898	213.661	147.543	1517.36	58.687	1
apkc_mutant_Ecad-mCh	Ecad-mCh	head 4	cell 1	head 4cell 1	7	72.838	516.869	229.337	151.841	2093.491	59.037	1
apkc_mutant_Ecad-mCh	Ecad-mCh	head 4	cell 1	head 4cell 1	8	72.838	522.134	254.356	145.841	2854.818	59.037	1
apkc_mutant_Ecad-mCh	Ecad-mCh	head 4	cell 1	head 4cell 1	9	27.666	459.834	157.403	156.376	1109.12	22.315	1
apkc_mutant_Ecad-mCh	Ecad-mCh	head 4	cell 1	head 4cell 1	10	19.02	462.216	163.603	169.357	1475.874	15.287	1
apkc_mutant_Ecad-mCh	Ecad-mCh	head 4	cell 1	head 4cell 1	11	17.723	491.44	162.349	181.112	1254.43	14.233	1
apkc_mutant_Ecad-mCh	Ecad-mCh	head 4		head 4								1
apkc_mutant_Ecad-mCh	Ecad-mCh	head 4	cell 2	head 4cell 2	1	92.939	202.847	49.705	141.139	517.5	75.379	1
apkc_mutant_Ecad-mCh	Ecad-mCh	head 4	cell 2	head 4cell 2	2	92.939	273.199	100.821	140.609	1004.213	75.379	1
apkc_mutant_Ecad-mCh	Ecad-mCh	head 4	cell 2	head 4cell 2	3	92.939	445.518	269.376	142.738	2351.179	75.379	1
apkc_mutant_Ecad-mCh	Ecad-mCh	head 4	cell 2	head 4cell 2	4	92.939	465.046	254.248	149.028	2758.427	75.379	1
apkc_mutant_Ecad-mCh	Ecad-mCh	head 4	cell 2	head 4cell 2	5	92.939	461.496	233.491	139.272	2296.662	75.379	1
apkc_mutant_Ecad-mCh	Ecad-mCh	head 4	cell 2	head 4cell 2	6	92.939	492.746	234.463	150.055	2201.436	75.379	1
apkc_mutant_Ecad-mCh	Ecad-mCh	head 4	cell 2	head 4cell 2	7	94.668	548.331	260.018	151.139	1837.004	76.786	1
apkc_mutant_Ecad-mCh	Ecad-mCh	head 4	cell 2	head 4cell 2	8	94.668	587.172	307.928	152.972	2620.674	76.786	1
apkc_mutant_Ecad-mCh	Ecad-mCh	head 4	cell 2	head 4cell 2	9	94.452	534.515	305.767	149.18	2284.585	76.61	1
apkc_mutant_Ecad-mCh	Ecad-mCh	head 4		head 4								1
apkc_mutant_Ecad-mCh	Ecad-mCh	head 4	cell 3	head 4cell 3	1	78.458	235.664	76.82	131.08	671.544	63.608	1
apkc_mutant_Ecad-mCh	Ecad-mCh	head 4	cell 3	head 4cell 3	2	78.458	395.905	237.689	140.157	1876.296	63.608	1
apkc_mutant_Ecad-mCh	Ecad-mCh	head 4	cell 3	head 4cell 3	3	100.287	392.507	229.359	141.746	2525.18	81.354	1
apkc_mutant_Ecad-mCh	Ecad-mCh	head 4	cell 3	head 4cell 3	4	100.287	397.797	207.558	141.983	2186.017	81.354	1
apkc_mutant_Ecad-mCh	Ecad-mCh	head 4	cell 3	head 4cell 3	5	100.287	415.325	207.285	137.996	1634.789	81.354	1
apkc_mutant_Ecad-mCh	Ecad-mCh	head 4	cell 3	head 4cell 3	6	98.342	433.767	210.211	148.612	2065.977	79.773	1
apkc_mutant_Ecad-mCh	Ecad-mCh	head 4	cell 3	head 4cell 3	7	98.342	455.527	202.832	149.715	1874.849	79.773	1
apkc_mutant_Ecad-mCh	Ecad-mCh	head 4	cell 3	head 4cell 3	8	98.342	435.392	195.989	149.191	1951.023	79.773	1
apkc_mutant_Ecad-mCh	Ecad-mCh	head 4	cell 3	head 4cell 3	9	88.832	405.154	172.63	150.134	1508.233	72.041	1
apkc_mutant_Ecad-mCh	Ecad-mCh	head 4	cell 3	head 4cell 3	10	48.199	418.807	190.365	148.599	1583.083	39.007	1
apkc_mutant_Ecad-mCh	Ecad-mCh	head 4	cell 3	head 4cell 3	11	36.095	393.697	186.926	147.956	1470.894	29.168	1
apkc_mutant_Ecad-mCh	Ecad-mCh	head 4	cell 3	head 4cell 3	12	36.095	396.695	179.579	149.129	1452.114	29.168	1
apkc_mutant_Ecad-mCh	Ecad-mCh	head 4	cell 3	head 4cell 3	13	28.962	388.771	175.838	148.202	1242.57	23.37	1
apkc_mutant_Ecad-mCh	Ecad-mCh	head 4	cell 3	head 4cell 3	14	14.697	418.686	175.796	157.126	1219.136	11.773	1
apkc_mutant_Ecad-mCh	Ecad-mCh	head 4		head 4								1
apkc_mutant_Ecad-mCh	Ecad-mCh	head 4	cell 4	head 4cell 4	1	84.509	223.249	70.662	131.174	694.946	68.527	1
apkc_mutant_Ecad-mCh	Ecad-mCh	head 4	cell 4	head 4cell 4	2	84.509	324.832	170.059	134.997	1589.766	68.527	1
apkc_mutant_Ecad-mCh	Ecad-mCh	head 4	cell 4	head 4cell 4	3	84.509	339.656	159.901	144.546	1601.703	68.527	1
apkc_mutant_Ecad-mCh	Ecad-mCh	head 4	cell 4	head 4cell 4	4	84.509	342.245	150.639	141.529	1650.916	68.527	1
apkc_mutant_Ecad-mCh	Ecad-mCh	head 4	cell 4	head 4cell 4	5	84.509	352.821	149.852	148.458	1458.096	68.527	1
apkc_mutant_Ecad-mCh	Ecad-mCh	head 4	cell 4	head 4cell 4	6	84.509	364.928	165.11	136.93	1236.148	68.527	1
apkc_mutant_Ecad-mCh	Ecad-mCh	head 4	cell 4	head 4cell 4	7	80.187	421.88	199.548	146.153	1574.045	65.013	1
apkc_mutant_Ecad-mCh	Ecad-mCh	head 4	cell 4	head 4cell 4	8	80.187	419.39	178.406	145.937	1533.486	65.013	1
apkc_mutant_Ecad-mCh	Ecad-mCh	head 4	cell 4	head 4cell 4	9	72.406	374.876	127.642	140.494	1224.916	58.688	1
apkc_mutant_Ecad-mCh	Ecad-mCh	head 4		head 4								1
apkc_mutant_Ecad-mCh	Ecad-mCh	head 4		head 4								1
apkc_mutant_Ecad-mCh	Ecad-mCh	head 4	cell 5	head 4cell 5	1	85.374	217.979	68.595	139.374	638.809	69.229	1
apkc_mutant_Ecad-mCh	Ecad-mCh	head 4	cell 5	head 4cell 5	2	85.374	249.658	104.915	139.014	949.934	69.229	1
apkc_mutant_Ecad-mCh	Ecad-mCh	head 4	cell 5	head 4cell 5	3	85.374	296.036	134.303	137.247	1136.11	69.229	1
apkc_mutant_Ecad-mCh	Ecad-mCh	head 4	cell 5	head 4cell 5	4	85.374	289.374	116.621	142.752	1295.923	69.229	1
apkc_mutant_Ecad-mCh	Ecad-mCh	head 4	cell 5	head 4cell 5	5	82.78	306.26	118.872	139.142	1343.054	67.12	1
apkc_mutant_Ecad-mCh	Ecad-mCh	head 4	cell 5	head 4cell 5	6	82.78	312.37	121.77	145.689	1240.988	67.12	1
apkc_mutant_Ecad-mCh	Ecad-mCh	head 4	cell 5	head 4cell 5	7	82.78	321.467	129.93	147.467	1419.461	67.12	1
apkc_mutant_Ecad-mCh	Ecad-mCh	head 4	cell 5	head 4cell 5	8	82.78	329.682	129.03	148.634	1231.579	67.12	1
apkc_mutant_Ecad-mCh	Ecad-mCh	head 4	cell 5	head 4cell 5	9	82.348	353.353	136.338	147.387	1112.324	66.769	1
apkc_mutant_Ecad-mCh	Ecad-mCh	head 4	cell 5	head 4cell 5	10	82.348	351.206	134.013	124.109	1188.8	66.769	1
apkc_mutant_Ecad-mCh	Ecad-mCh	head 4	cell 5	head 4cell 5	11	82.348	348.904	130.748	142.329	1020.223	66.769	1
apkc_mutant_Ecad-mCh	Ecad-mCh	head 4	cell 5	head 4cell 5	12	83.645	341.004	119.286	141.022	954.129	67.824	1
apkc_mutant_Ecad-mCh	Ecad-mCh	head 4	cell 5	head 4cell 5	13	83.645	327.88	106.935	149.159	969.512	67.824	1
apkc_mutant_Ecad-mCh	Ecad-mCh	head 4		head 4								1
apkc_mutant_Ecad-mCh	Ecad-mCh	head 4	cell 6	head 4cell 6	1	109.365	209.015	58.213	140.554	661.25	88.731	1
apkc_mutant_Ecad-mCh	Ecad-mCh	head 4	cell 6	head 4cell 6	2	109.365	228.327	73.772	140.036	701.007	88.731	1
apkc_mutant_Ecad-mCh	Ecad-mCh	head 4	cell 6	head 4cell 6	3	109.365	297.708	137.766	142.859	1046.57	88.731	1
apkc_mutant_Ecad-mCh	Ecad-mCh	head 4	cell 6	head 4cell 6	4	109.365	321.974	145.084	144.289	1528.953	88.731	1
apkc_mutant_Ecad-mCh	Ecad-mCh	head 4	cell 6	head 4cell 6	5	109.365	319.254	131.717	144.936	1337.749	88.731	1
apkc_mutant_Ecad-mCh	Ecad-mCh	head 4	cell 6	head 4cell 6	6	109.365	315.966	118.059	138.039	1494.477	88.731	1
apkc_mutant_Ecad-mCh	Ecad-mCh	head 4	cell 6	head 4cell 6	7	108.717	340.801	134.563	138.977	1215.388	88.206	1
apkc_mutant_Ecad-mCh	Ecad-mCh	head 4	cell 6	head 4cell 6	8	108.717	344.878	145.006	149.013	1294.863	88.206	1
apkc_mutant_Ecad-mCh	Ecad-mCh	head 4	cell 6	head 4cell 6	9	108.717	355.593	150.313	140.88	1271.408	88.206	1
apkc_mutant_Ecad-mCh	Ecad-mCh	head 4	cell 6	head 4cell 6	10	108.717	362.245	148.552	149.491	1439.856	88.206	1
apkc_mutant_Ecad-mCh	Ecad-mCh	head 4	cell 6	head 4cell 6	11	105.907	372.339	177.321	144.235	2194.912	85.923	1
apkc_mutant_Ecad-mCh	Ecad-mCh	head 4	cell 6	head 4cell 6	12	105.907	367.216	175.782	143.613	2187.16	85.923	1
apkc_mutant_Ecad-mCh	Ecad-mCh	head 4	cell 6	head 4cell 6	13	102.449	358.756	192.901	139.434	3039.905	83.112	1
apkc_mutant_Ecad-mCh	Ecad-mCh	head 4	cell 6	head 4cell 6	14	102.449	342.458	173.996	139.367	2523.733	83.112	1
apkc_mutant_Ecad-mCh	Ecad-mCh	head 4	cell 6	head 4cell 6	15	69.812	308.85	100.35	146.442	973.622	56.579	1
apkc_mutant_Ecad-mCh	Ecad-mCh	head 4		head 4								1
apkc_mutant_Ecad-mCh	Ecad-mCh	head 4	cell 7	head 4cell 7	1	78.674	225.265	72.161	141.995	611.104	63.782	1
apkc_mutant_Ecad-mCh	Ecad-mCh	head 4	cell 7	head 4cell 7	2	78.674	248.732	92.078	138.035	988.022	63.782	1
apkc_mutant_Ecad-mCh	Ecad-mCh	head 4	cell 7	head 4cell 7	3	78.674	251.719	89.683	135.813	949.757	63.782	1
apkc_mutant_Ecad-mCh	Ecad-mCh	head 4	cell 7	head 4cell 7	4	78.674	253.679	88.035	140.966	894.613	63.782	1
apkc_mutant_Ecad-mCh	Ecad-mCh	head 4	cell 7	head 4cell 7	5	78.674	253.779	85.063	142.523	1382.394	63.782	1
apkc_mutant_Ecad-mCh	Ecad-mCh	head 4	cell 7	head 4cell 7	6	78.242	251.69	80.227	142.253	836.346	63.432	1
apkc_mutant_Ecad-mCh	Ecad-mCh	head 4	cell 7	head 4cell 7	7	78.242	264.508	88.002	142.742	830.693	63.432	1
apkc_mutant_Ecad-mCh	Ecad-mCh	head 4	cell 7	head 4cell 7	8	78.242	281.905	95.19	144.537	895.298	63.432	1
apkc_mutant_Ecad-mCh	Ecad-mCh	head 4	cell 7	head 4cell 7	9	78.674	297.448	98.428	144.444	903.294	63.781	1
apkc_mutant_Ecad-mCh	Ecad-mCh	head 4	cell 7	head 4cell 7	10	78.674	294.727	98.089	137.619	844.376	63.781	1
apkc_mutant_Ecad-mCh	Ecad-mCh	head 4	cell 7	head 4cell 7	11	78.674	293.447	89.827	139.646	762.054	63.781	1
apkc_mutant_Ecad-mCh	Ecad-mCh	head 4	cell 7	head 4cell 7	12	79.754	280.859	86.314	141.943	745.611	64.662	1
apkc_mutant_Ecad-mCh	Ecad-mCh											1
apkc_mutant_Ecad-mCh	Ecad-mCh	head 5	cell 1	head 5cell 1	1	86.671	256.499	132.941	134.751	1281.978	70.282	1
apkc_mutant_Ecad-mCh	Ecad-mCh	head 5	cell 1	head 5cell 1	2	86.671	328.499	241.09	143.798	1759.398	70.282	1
apkc_mutant_Ecad-mCh	Ecad-mCh	head 5	cell 1	head 5cell 1	3	86.671	431.497	353.431	144.222	2845.936	70.282	1
apkc_mutant_Ecad-mCh	Ecad-mCh	head 5	cell 1	head 5cell 1	4	87.103	589.67	434.739	146.549	3937.302	70.631	1
apkc_mutant_Ecad-mCh	Ecad-mCh	head 5	cell 1	head 5cell 1	5	87.103	711.599	456.14	142.518	3286.54	70.631	1
apkc_mutant_Ecad-mCh	Ecad-mCh	head 5	cell 1	head 5cell 1	6	87.103	780.349	473.246	148.253	3259.555	70.631	1
apkc_mutant_Ecad-mCh	Ecad-mCh	head 5	cell 1	head 5cell 1	7	86.455	824.488	480.749	155.41	3195.046	70.106	1
apkc_mutant_Ecad-mCh	Ecad-mCh	head 5	cell 1	head 5cell 1	8	86.455	845.16	443.403	184.357	2948.951	70.106	1
apkc_mutant_Ecad-mCh	Ecad-mCh	head 5	cell 1	head 5cell 1	9	86.455	844.8	423.913	195.416	2963.548	70.106	1
apkc_mutant_Ecad-mCh	Ecad-mCh	head 5	cell 1	head 5cell 1	10	86.887	865.176	439.835	161.166	3695.921	70.458	1
apkc_mutant_Ecad-mCh	Ecad-mCh	head 5	cell 1	head 5cell 1	11	89.913	825.845	426.459	155.437	3373.304	72.916	1
apkc_mutant_Ecad-mCh	Ecad-mCh	head 5	cell 1	head 5cell 1	12	89.913	732.517	360.126	185.102	2780.277	72.916	1
apkc_mutant_Ecad-mCh	Ecad-mCh	head 5	cell 1	head 5cell 1	13	90.129	636.815	302.503	166.637	2888.91	73.093	1
apkc_mutant_Ecad-mCh	Ecad-mCh	head 5	cell 1	head 5cell 1	14	91.21	513.958	213.229	151.758	2030.019	73.974	1
apkc_mutant_Ecad-mCh	Ecad-mCh	head 5	cell 1	head 5cell 1	15	25.288	446.878	161.656	173.564	1494.519	20.383	1
apkc_mutant_Ecad-mCh	Ecad-mCh	head 5		head 5								1
apkc_mutant_Ecad-mCh	Ecad-mCh	head 5	cell 2	head 5cell 2	1	76.296	238.846	107.363	138.006	1100.023	61.849	1
apkc_mutant_Ecad-mCh	Ecad-mCh	head 5	cell 2	head 5cell 2	2	76.296	298.913	183.428	135.409	1667.256	61.849	1
apkc_mutant_Ecad-mCh	Ecad-mCh	head 5	cell 2	head 5cell 2	3	76.296	404.291	302.805	147.393	2793.597	61.849	1
apkc_mutant_Ecad-mCh	Ecad-mCh	head 5	cell 2	head 5cell 2	4	76.296	525.547	373.476	139.672	3753.833	61.849	1
apkc_mutant_Ecad-mCh	Ecad-mCh	head 5	cell 2	head 5cell 2	5	77.161	658.739	417.507	150.587	3490.96	62.55	1
apkc_mutant_Ecad-mCh	Ecad-mCh	head 5	cell 2	head 5cell 2	6	77.161	692.061	393.645	156.511	3915.881	62.55	1
apkc_mutant_Ecad-mCh	Ecad-mCh	head 5	cell 2	head 5cell 2	7	77.809	712.253	389.852	154.638	3687.981	63.078	1
apkc_mutant_Ecad-mCh	Ecad-mCh	head 5	cell 2	head 5cell 2	8	77.809	733.301	354.324	156.413	3652.54	63.078	1
apkc_mutant_Ecad-mCh	Ecad-mCh	head 5	cell 2	head 5cell 2	9	81.267	735.59	382.573	164.083	3267.976	65.89	1
apkc_mutant_Ecad-mCh	Ecad-mCh	head 5	cell 2	head 5cell 2	10	81.267	750.704	346.717	144.86	2696.572	65.89	1
apkc_mutant_Ecad-mCh	Ecad-mCh	head 5	cell 2	head 5cell 2	11	85.158	672.119	341.053	159.621	2696.932	69.052	1
apkc_mutant_Ecad-mCh	Ecad-mCh	head 5	cell 2	head 5cell 2	12	85.158	628.123	320.048	175.625	3604.627	69.052	1
apkc_mutant_Ecad-mCh	Ecad-mCh	head 5	cell 2	head 5cell 2	13	64.841	616.557	307.576	141.454	2682.639	52.535	1
apkc_mutant_Ecad-mCh	Ecad-mCh	head 5	cell 2	head 5cell 2	14	61.383	510.791	232.306	154.078	2196.462	49.725	1
apkc_mutant_Ecad-mCh	Ecad-mCh	head 5	cell 2	head 5cell 2	15	52.089	389.284	153.886	145.817	1225.99	42.171	1
apkc_mutant_Ecad-mCh	Ecad-mCh	head 5		head 5								1
apkc_mutant_Ecad-mCh	Ecad-mCh	head 5	cell 3	head 5cell 3	1	32.637	347.091	200.246	144.363	2008.246	26.356	1
apkc_mutant_Ecad-mCh	Ecad-mCh	head 5	cell 3	head 5cell 3	2	32.637	515.94	359.19	150.233	3222.169	26.356	1
apkc_mutant_Ecad-mCh	Ecad-mCh	head 5	cell 3	head 5cell 3	3	52.521	441.231	392.388	138.342	3461.158	42.523	1
apkc_mutant_Ecad-mCh	Ecad-mCh	head 5	cell 3	head 5cell 3	4	52.521	530.805	458.476	142.191	3676.46	42.523	1
apkc_mutant_Ecad-mCh	Ecad-mCh	head 5	cell 3	head 5cell 3	5	52.737	610.547	501.703	139.696	3761.925	42.698	1
apkc_mutant_Ecad-mCh	Ecad-mCh	head 5	cell 3	head 5cell 3	6	57.492	694.026	519.436	145.389	3575.883	46.559	1
apkc_mutant_Ecad-mCh	Ecad-mCh	head 5	cell 3	head 5cell 3	7	71.109	707.701	505.458	147.236	3421.651	57.628	1
apkc_mutant_Ecad-mCh	Ecad-mCh	head 5	cell 3	head 5cell 3	8	71.974	681.284	475.149	147.755	3436.474	58.336	1
apkc_mutant_Ecad-mCh	Ecad-mCh	head 5	cell 3	head 5cell 3	9	96.397	641.763	457.457	142.798	3525.315	78.19	1
apkc_mutant_Ecad-mCh	Ecad-mCh	head 5	cell 3	head 5cell 3	10	96.397	654.033	410.435	147.813	3418.962	78.19	1
apkc_mutant_Ecad-mCh	Ecad-mCh	head 5	cell 3	head 5cell 3	11	88.616	719.167	423.87	148.082	3472.404	71.866	1
apkc_mutant_Ecad-mCh	Ecad-mCh	head 5	cell 3	head 5cell 3	12	88.616	736.617	430.07	143.192	3336.391	71.866	1
apkc_mutant_Ecad-mCh	Ecad-mCh	head 5	cell 3	head 5cell 3	13	64.409	867.613	442.931	143.637	3091.26	52.184	1
apkc_mutant_Ecad-mCh	Ecad-mCh	head 5	cell 3	head 5cell 3	14	58.357	870.476	427.271	148.477	3234.276	47.266	1
apkc_mutant_Ecad-mCh	Ecad-mCh	head 5	cell 3	head 5cell 3	15	52.305	838.172	444.799	151.13	3456.402	42.346	1
apkc_mutant_Ecad-mCh	Ecad-mCh	head 5	cell 3	head 5cell 3	16	42.579	853.948	448.058	199.227	3000.875	34.439	1
apkc_mutant_Ecad-mCh	Ecad-mCh	head 5	cell 3	head 5cell 3	17	28.314	922.973	399.954	241.942	2568.126	22.841	1
apkc_mutant_Ecad-mCh	Ecad-mCh	head 5	cell 3	head 5cell 3	18	25.072	908.596	338.667	237.881	2584.634	20.204	1
apkc_mutant_Ecad-mCh	Ecad-mCh	head 5	cell 3	head 5cell 3	19	15.562	846.073	345.686	254.217	2298.348	12.475	1
apkc_mutant_Ecad-mCh	Ecad-mCh	head 5	cell 3	head 5cell 3	20	11.455	806.037	276.395	257.455	1824.035	9.137	1
apkc_mutant_Ecad-mCh	Ecad-mCh											1
apkc_mutant_Ecad-mCh	Ecad-mCh	head 6	cell 1	head 6cell 1	1	78.89	234.463	73.1	141.561	660.993	63.956	1
apkc_mutant_Ecad-mCh	Ecad-mCh	head 6	cell 1	head 6cell 1	2	78.89	278.544	111.062	136.975	1042.338	63.956	1
apkc_mutant_Ecad-mCh	Ecad-mCh	head 6	cell 1	head 6cell 1	3	78.89	311.997	129.979	148.904	1247.744	63.956	1
apkc_mutant_Ecad-mCh	Ecad-mCh	head 6	cell 1	head 6cell 1	4	79.538	318.09	117.49	137.521	1127.709	64.483	1
apkc_mutant_Ecad-mCh	Ecad-mCh	head 6	cell 1	head 6cell 1	5	79.538	331.222	127.244	147.26	1115.09	64.483	1
apkc_mutant_Ecad-mCh	Ecad-mCh	head 6	cell 1	head 6cell 1	6	77.593	375.652	142.902	145.101	1105.988	62.903	1
apkc_mutant_Ecad-mCh	Ecad-mCh	head 6	cell 1	head 6cell 1	7	77.593	394.96	147.155	152.586	1264.98	62.903	1
apkc_mutant_Ecad-mCh	Ecad-mCh	head 6	cell 1	head 6cell 1	8	74.351	398.777	139.853	150.683	1439.341	60.268	1
apkc_mutant_Ecad-mCh	Ecad-mCh	head 6		head 6								1
apkc_mutant_Ecad-mCh	Ecad-mCh	head 6	cell 2	head 6cell 2	1	83.429	199.347	47.45	137.931	626.724	67.647	1
apkc_mutant_Ecad-mCh	Ecad-mCh	head 6	cell 2	head 6cell 2	2	83.429	235.632	78.655	144.005	705.498	67.647	1
apkc_mutant_Ecad-mCh	Ecad-mCh	head 6	cell 2	head 6cell 2	3	82.78	280.086	114.355	148.871	1117.474	67.12	1
apkc_mutant_Ecad-mCh	Ecad-mCh	head 6	cell 2	head 6cell 2	4	82.78	291.438	104.829	138.789	1030.78	67.12	1
apkc_mutant_Ecad-mCh	Ecad-mCh	head 6	cell 2	head 6cell 2	5	82.78	311.185	107.426	148.075	1081.089	67.12	1
apkc_mutant_Ecad-mCh	Ecad-mCh	head 6	cell 2	head 6cell 2	6	85.158	324.674	120.537	145.484	1281.104	69.054	1
apkc_mutant_Ecad-mCh	Ecad-mCh	head 6	cell 2	head 6cell 2	7	85.158	343.056	144.647	147.768	2241.596	69.054	1
apkc_mutant_Ecad-mCh	Ecad-mCh	head 6	cell 2	head 6cell 2	8	36.527	318.982	95.023	145.163	722.732	29.52	1
apkc_mutant_Ecad-mCh	Ecad-mCh	head 6		head 6								1
apkc_mutant_Ecad-mCh	Ecad-mCh	head 6	cell 3	head 6cell 3	1	71.325	210.661	57.448	144.247	521.811	57.809	1
apkc_mutant_Ecad-mCh	Ecad-mCh	head 6	cell 3	head 6cell 3	2	71.325	246.988	88.79	136.824	866.482	57.809	1
apkc_mutant_Ecad-mCh	Ecad-mCh	head 6	cell 3	head 6cell 3	3	71.325	281.693	119.367	128.545	1056.502	57.809	1
apkc_mutant_Ecad-mCh	Ecad-mCh	head 6	cell 3	head 6cell 3	4	71.325	300.012	131.072	142.485	1587.937	57.809	1
apkc_mutant_Ecad-mCh	Ecad-mCh	head 6	cell 3	head 6cell 3	5	70.461	311.94	123.372	149.375	1189.418	57.106	1
apkc_mutant_Ecad-mCh	Ecad-mCh	head 6	cell 3	head 6cell 3	6	70.461	334.918	130.512	138.163	1019.893	57.106	1
apkc_mutant_Ecad-mCh	Ecad-mCh	head 6	cell 3	head 6cell 3	7	71.325	387.935	157.607	148.401	1210.172	57.808	1
apkc_mutant_Ecad-mCh	Ecad-mCh	head 6	cell 3	head 6cell 3	8	71.325	399.947	152.148	143.714	1059.399	57.808	1
apkc_mutant_Ecad-mCh	Ecad-mCh	head 6	cell 3	head 6cell 3	9	68.732	389.36	129.78	150.399	922.922	55.7	1
apkc_mutant_Ecad-mCh	Ecad-mCh	head 6	cell 3	head 6cell 3	10	39.553	333.649	99.909	151.021	860.817	31.979	1
apkc_mutant_Ecad-mCh	Ecad-mCh	head 6		head 6								1
apkc_mutant_Ecad-mCh	Ecad-mCh	head 6	cell 4	head 6cell 4	1	86.022	235.843	76.969	138.548	880.68	69.751	1
apkc_mutant_Ecad-mCh	Ecad-mCh	head 6	cell 4	head 6cell 4	2	86.022	283.548	125.339	134.696	1245.626	69.751	1
apkc_mutant_Ecad-mCh	Ecad-mCh	head 6	cell 4	head 6cell 4	3	86.022	324.471	157.095	138.66	1472.496	69.751	1
apkc_mutant_Ecad-mCh	Ecad-mCh	head 6	cell 4	head 6cell 4	4	86.022	342.804	149.287	128.312	1263.352	69.751	1
apkc_mutant_Ecad-mCh	Ecad-mCh	head 6	cell 4	head 6cell 4	5	87.535	351.702	143.895	129.405	1230.203	70.983	1
apkc_mutant_Ecad-mCh	Ecad-mCh	head 6	cell 4	head 6cell 4	6	87.535	385.012	158.904	150.12	1366.733	70.983	1
apkc_mutant_Ecad-mCh	Ecad-mCh	head 6	cell 4	head 6cell 4	7	88.184	395.451	160.365	142.881	1312.949	71.513	1
apkc_mutant_Ecad-mCh	Ecad-mCh	head 6	cell 4	head 6cell 4	8	88.184	409.065	160.134	146.197	1289.396	71.513	1
apkc_mutant_Ecad-mCh	Ecad-mCh	head 6	cell 4	head 6cell 4	9	88.184	376.123	138.569	144.416	1145.684	71.513	1
apkc_mutant_Ecad-mCh	Ecad-mCh	head 6	cell 4	head 6cell 4	10	20.749	359.351	130.163	150.975	894.577	16.688	1
apkc_mutant_Ecad-mCh	Ecad-mCh	head 6		head 6								1
apkc_mutant_Ecad-mCh	Ecad-mCh	head 6	cell 5	head 6cell 5	1	77.377	227.302	73.977	140.421	658.537	62.724	1
apkc_mutant_Ecad-mCh	Ecad-mCh	head 6	cell 5	head 6cell 5	2	77.377	265.886	111.26	134.147	1103.133	62.724	1
apkc_mutant_Ecad-mCh	Ecad-mCh	head 6	cell 5	head 6cell 5	3	77.377	312.124	144.918	138.189	1274.038	62.724	1
apkc_mutant_Ecad-mCh	Ecad-mCh	head 6	cell 5	head 6cell 5	4	77.377	335.986	134.745	147.599	998.37	62.726	1
apkc_mutant_Ecad-mCh	Ecad-mCh	head 6	cell 5	head 6cell 5	5	77.377	343.504	128.825	144.983	1403.488	62.726	1
apkc_mutant_Ecad-mCh	Ecad-mCh	head 6	cell 5	head 6cell 5	6	77.377	347.608	134.384	143.637	1421.738	62.726	1
apkc_mutant_Ecad-mCh	Ecad-mCh	head 6	cell 5	head 6cell 5	7	77.377	337.877	132.369	142.947	995.752	62.726	1
apkc_mutant_Ecad-mCh	Ecad-mCh	head 6	cell 5	head 6cell 5	8	80.835	385.256	132.671	150.312	1272.017	65.539	1
apkc_mutant_Ecad-mCh	Ecad-mCh	head 6	cell 5	head 6cell 5	9	80.835	357.151	126.301	152.108	2327.032	65.539	1
apkc_mutant_Ecad-mCh	Ecad-mCh	head 6	cell 5	head 6cell 5	10	26.801	383.789	198.512	154.153	2228.07	21.611	1
apkc_mutant_Ecad-mCh	Ecad-mCh											1
apkc_mutant_Ecad-mCh	Ecad-mCh	head 7	cell 1	head 7cell 1	1	75.432	254.805	123.34	144.661	1086.187	61.148	1
apkc_mutant_Ecad-mCh	Ecad-mCh	head 7	cell 1	head 7cell 1	2	74.351	325.27	174.76	139.02	1850.55	60.268	1
apkc_mutant_Ecad-mCh	Ecad-mCh	head 7	cell 1	head 7cell 1	3	74.351	376.914	184.605	139.136	1463.936	60.268	1
apkc_mutant_Ecad-mCh	Ecad-mCh	head 7	cell 1	head 7cell 1	4	74.999	440.34	216.573	149.2	1627.723	60.795	1
apkc_sibling_Ecad-mCh	Ecad-mCh	head 7	cell 1	head 7cell 1	5	75.864	505.165	260.261	150.898	2188.574	61.498	1
apkc_sibling_Ecad-mCh	Ecad-mCh	head 7	cell 1	head 7cell 1	6	75.864	542.89	276.836	146.522	2250.818	61.498	1
apkc_sibling_Ecad-mCh	Ecad-mCh	head 7	cell 1	head 7cell 1	7	75.864	565.558	296.24	150.279	2422.536	61.498	1
apkc_sibling_Ecad-mCh	Ecad-mCh	head 7	cell 1	head 7cell 1	8	75.864	600.01	314.69	153.331	2379.026	61.499	1
apkc_sibling_Ecad-mCh	Ecad-mCh	head 7	cell 1	head 7cell 1	9	75.864	632.549	324.44	148.043	2044.802	61.499	1
apkc_sibling_Ecad-mCh	Ecad-mCh	head 7	cell 1	head 7cell 1	10	75.864	637.175	336.859	141.595	2451.828	61.499	1
apkc_sibling_Ecad-mCh	Ecad-mCh	head 7	cell 1	head 7cell 1	11	69.812	629.114	315.201	144.789	1829.378	56.575	1
apkc_sibling_Ecad-mCh	Ecad-mCh	head 7	cell 1	head 7cell 1	12	69.812	595.658	290.566	151.75	2064.01	56.575	1
apkc_sibling_Ecad-mCh	Ecad-mCh	head 7	cell 1	head 7cell 1	13	58.141	614.402	301.177	178.607	1975.381	47.087	1
apkc_sibling_Ecad-mCh	Ecad-mCh	head 7	cell 1	head 7cell 1	14	54.899	581.455	233.258	151.59	1614.082	44.451	1
apkc_sibling_Ecad-mCh	Ecad-mCh	head 7	cell 1	head 7cell 1	15	50.36	513.029	204.897	168.381	1682.577	40.763	1
apkc_sibling_Ecad-mCh	Ecad-mCh	head 7	cell 1	head 7cell 1	16	22.262	408.547	163.346	152.589	1044.976	17.921	1
apkc_sibling_Ecad-mCh	Ecad-mCh											1
apkc_sibling_Ecad-mCh	Ecad-mCh	head 8	cell 1	head 8cell 1	1	100.504	259.991	82.832	144.731	1048.914	81.53	1
apkc_sibling_Ecad-mCh	Ecad-mCh	head 8	cell 1	head 8cell 1	2	100.504	359.853	185.282	147.104	2644.892	81.53	1
apkc_sibling_Ecad-mCh	Ecad-mCh	head 8	cell 1	head 8cell 1	3	99.423	717.798	589.136	143.735	4095	80.652	1
apkc_sibling_Ecad-mCh	Ecad-mCh	head 8	cell 1	head 8cell 1	4	99.423	885.571	727.317	143.842	4095	80.652	1
apkc_sibling_Ecad-mCh	Ecad-mCh	head 8	cell 1	head 8cell 1	5	98.991	1000.957	631.135	155.245	4095	80.299	1
apkc_sibling_Ecad-mCh	Ecad-mCh	head 8	cell 1	head 8cell 1	6	98.991	992.842	614.108	163.9	4035.927	80.299	1
apkc_sibling_Ecad-mCh	Ecad-mCh	head 8	cell 1	head 8cell 1	7	99.207	1096.085	660.242	176.712	4034.962	80.474	1
apkc_sibling_Ecad-mCh	Ecad-mCh	head 8	cell 1	head 8cell 1	8	99.207	1102.049	605.084	187.165	4003.844	80.474	1
apkc_sibling_Ecad-mCh	Ecad-mCh	head 8	cell 1	head 8cell 1	9	99.207	1042.213	520.647	169.464	3693.469	80.474	1
apkc_sibling_Ecad-mCh	Ecad-mCh	head 8	cell 1	head 8cell 1	10	51.873	1007.487	496.533	243.06	3604.099	41.995	1
apkc_sibling_Ecad-mCh	Ecad-mCh	head 8	cell 1	head 8cell 1	11	31.988	1011.228	479.865	213.04	3413.544	25.828	1
apkc_sibling_Ecad-mCh	Ecad-mCh	head 8	cell 1	head 8cell 1	12	27.233	682.067	297.106	153.234	2466.702	21.964	1
apkc_sibling_Ecad-mCh	Ecad-mCh	head 8	cell 1	head 8cell 1	13	9.294	1005.593	331.64	425.758	1880.191	7.38	1
apkc_sibling_Ecad-mCh	Ecad-mCh	head 8		head 8								1
apkc_sibling_Ecad-mCh	Ecad-mCh	head 8	cell 2	head 8cell 2	1	100.287	283.165	97.414	141.767	977.838	81.355	1
apkc_sibling_Ecad-mCh	Ecad-mCh	head 8	cell 2	head 8cell 2	2	100.287	414.732	237.071	143.771	2945.011	81.355	1
apkc_sibling_Ecad-mCh	Ecad-mCh	head 8	cell 2	head 8cell 2	3	99.855	853.043	655.907	144.947	4095	81.003	1
apkc_sibling_Ecad-mCh	Ecad-mCh	head 8	cell 2	head 8cell 2	4	99.855	995.828	712.817	147.858	4095	81.003	1
apkc_sibling_Ecad-mCh	Ecad-mCh	head 8	cell 2	head 8cell 2	5	100.936	1037.875	673.621	147.538	4095	81.88	1
apkc_sibling_Ecad-mCh	Ecad-mCh	head 8	cell 2	head 8cell 2	6	100.071	1140.371	631.008	175.425	4028.159	81.178	1
apkc_sibling_Ecad-mCh	Ecad-mCh	head 8	cell 2	head 8cell 2	7	101.368	1220.396	617.584	231.863	3809.009	82.232	1
apkc_sibling_Ecad-mCh	Ecad-mCh	head 8	cell 2	head 8cell 2	8	103.746	1292.797	585.179	258.58	3662.157	84.162	1
apkc_sibling_Ecad-mCh	Ecad-mCh	head 8	cell 2	head 8cell 2	9	103.746	1084.76	411.214	277.725	3314.863	84.162	1
apkc_sibling_Ecad-mCh	Ecad-mCh	head 8		head 8								1
apkc_sibling_Ecad-mCh	Ecad-mCh	head 8	cell 3	head 8cell 3	1	81.051	270.335	84.267	145.129	875.65	65.714	1
apkc_sibling_Ecad-mCh	Ecad-mCh	head 8	cell 3	head 8cell 3	2	81.051	402.85	199.576	141.406	1715.687	65.714	1
apkc_sibling_Ecad-mCh	Ecad-mCh	head 8	cell 3	head 8cell 3	3	81.051	760.595	610.675	147.983	3992.71	65.714	1
apkc_sibling_Ecad-mCh	Ecad-mCh	head 8	cell 3	head 8cell 3	4	80.835	962.054	715.114	152.2	4085.572	65.538	1
apkc_sibling_Ecad-mCh	Ecad-mCh	head 8	cell 3	head 8cell 3	5	80.403	1044.417	652.267	155.734	4093.773	65.186	1
apkc_sibling_Ecad-mCh	Ecad-mCh	head 8	cell 3	head 8cell 3	6	80.403	1002.172	609.88	163.715	3954.939	65.186	1
apkc_sibling_Ecad-mCh	Ecad-mCh	head 8	cell 3	head 8cell 3	7	83.861	1129.653	637.229	186.6	3969.983	68	1
apkc_sibling_Ecad-mCh	Ecad-mCh	head 8	cell 3	head 8cell 3	8	82.997	1218.38	611.743	188.09	3597.903	67.296	1
apkc_sibling_Ecad-mCh	Ecad-mCh	head 8	cell 3	head 8cell 3	9	83.213	1188.216	504.931	247.43	3435.809	67.47	1
apkc_sibling_Ecad-mCh	Ecad-mCh	head 8	cell 3	head 8cell 3	10	42.795	1094.32	501.365	210.575	3655.74	34.615	1
apkc_sibling_Ecad-mCh	Ecad-mCh	head 8	cell 3	head 8cell 3	11	33.933	991.847	476.191	201.591	3397.452	27.411	1
apkc_sibling_Ecad-mCh	Ecad-mCh
apkc_sibling_Ecad-mCh	Ecad-mCh	head 10	cell 1	head 10cell 1	1	89.481	261.621	81.707	145.847	748.13	72.564	1
apkc_sibling_Ecad-mCh	Ecad-mCh	head 10	cell 1	head 10cell 1	2	89.481	320.203	136.766	138.135	947.604	72.564	1
apkc_sibling_Ecad-mCh	Ecad-mCh	head 10	cell 1	head 10cell 1	3	91.858	404.022	216.368	140.291	1391.5	74.484	1
apkc_sibling_Ecad-mCh	Ecad-mCh	head 10	cell 1	head 10cell 1	4	91.858	536.838	308.155	148.387	2727.26	74.484	1
apkc_sibling_Ecad-mCh	Ecad-mCh	head 10	cell 1	head 10cell 1	5	91.858	559.291	296.735	150.125	2610.524	74.485	1
apkc_sibling_Ecad-mCh	Ecad-mCh	head 10	cell 1	head 10cell 1	6	91.858	549.144	298.964	151.029	3071.078	74.485	1
apkc_sibling_Ecad-mCh	Ecad-mCh	head 10	cell 1	head 10cell 1	7	91.858	553.144	301.833	144.336	2660.85	74.485	1
apkc_sibling_Ecad-mCh	Ecad-mCh	head 10	cell 1	head 10cell 1	8	91.858	555.638	314.858	149.786	3061.333	74.485	1
apkc_sibling_Ecad-mCh	Ecad-mCh	head 10	cell 1	head 10cell 1	9	91.858	630.048	314.528	154.456	2699.761	74.49	1
apkc_sibling_Ecad-mCh	Ecad-mCh	head 10	cell 1	head 10cell 1	10	91.858	662.25	330.894	165.022	2252.142	74.49	1
apkc_sibling_Ecad-mCh	Ecad-mCh	head 10	cell 1	head 10cell 1	11	92.074	684.919	299.362	148.098	2276.791	74.672	1
apkc_sibling_Ecad-mCh	Ecad-mCh	head 10	cell 1	head 10cell 1	12	92.074	640.231	278.574	177.545	2337.476	74.672	1
apkc_sibling_Ecad-mCh	Ecad-mCh	head 10	cell 1	head 10cell 1	13	79.322	608.653	244.109	171.155	2014.457	64.309	1
apkc_sibling_Ecad-mCh	Ecad-mCh	head 10	cell 1	head 10cell 1	14	78.458	578.346	247.599	162.558	2419.122	63.606	1
apkc_sibling_Ecad-mCh	Ecad-mCh	head 10	cell 1	head 10cell 1	15	34.15	570.713	264.651	161.184	2362.533	27.586	1
apkc_sibling_Ecad-mCh	Ecad-mCh	head 10	cell 1	head 10cell 1	16	39.985	575.155	228.008	175.89	2043.687	32.331	1
apkc_sibling_Ecad-mCh	Ecad-mCh	head 10	cell 1	head 10cell 1	17	20.749	605.695	289.192	166.981	1923.166	16.693	1
apkc_sibling_Ecad-mCh	Ecad-mCh	head 10	cell 1	head 10cell 1	18	27.666	587.918	258.478	174.067	1678.377	22.316	1
apkc_sibling_Ecad-mCh	Ecad-mCh	head 10	cell 1	head 10cell 1	19	27.233	612.588	237.741	163.641	1890.205	21.964	1
apkc_sibling_Ecad-mCh	Ecad-mCh	head 10	cell 1	head 10cell 1	20	22.046	656.895	271.291	202.919	2190.498	17.747	1
apkc_sibling_Ecad-mCh	Ecad-mCh	head 10	cell 2	head 10cell 2	1	117.362	262.906	91.836	136.358	906.145	95.231	1
apkc_sibling_Ecad-mCh	Ecad-mCh	head 10	cell 2	head 10cell 2	2	117.362	305.847	137.251	139.398	1093.427	95.231	1
apkc_sibling_Ecad-mCh	Ecad-mCh	head 10	cell 2	head 10cell 2	3	117.362	401.543	236.445	145.783	1737.853	95.231	1
apkc_sibling_Ecad-mCh	Ecad-mCh	head 10	cell 2	head 10cell 2	4	117.362	562.589	363.687	148.01	3421.532	95.231	1
apkc_sibling_Ecad-mCh	Ecad-mCh	head 10	cell 2	head 10cell 2	5	117.362	574.329	346.772	151.401	3809.624	95.231	1
apkc_sibling_Ecad-mCh	Ecad-mCh	head 10	cell 2	head 10cell 2	6	117.362	573.852	344.337	146.517	3687.78	95.231	1
apkc_sibling_Ecad-mCh	Ecad-mCh	head 10	cell 2	head 10cell 2	7	117.362	564.591	327.496	148.053	3250.135	95.231	1
apkc_sibling_Ecad-mCh	Ecad-mCh	head 10	cell 2	head 10cell 2	8	117.795	624.307	349.271	148.172	3396.254	95.583	1
apkc_sibling_Ecad-mCh	Ecad-mCh	head 10	cell 2	head 10cell 2	9	117.795	652.7	351.259	152.638	3040.958	95.583	1
apkc_sibling_Ecad-mCh	Ecad-mCh	head 10	cell 2	head 10cell 2	10	119.956	738.343	333.662	150.377	2683.597	97.343	1
apkc_sibling_Ecad-mCh	Ecad-mCh	head 10	cell 2	head 10cell 2	11	112.391	733.919	333.236	163.08	2352.955	91.187	1
apkc_sibling_Ecad-mCh	Ecad-mCh	head 10	cell 2	head 10cell 2	12	66.57	717.425	296.461	191.67	2304.036	53.939	1
apkc_sibling_Ecad-mCh	Ecad-mCh	head 10	cell 2	head 10cell 2	13	25.504	706.928	241.183	223.778	1665.358	20.557	1
apkc_sibling_Ecad-mCh	Ecad-mCh	head 10	cell 3	head 10cell 3	1	113.256	240.143	79.919	145.013	709.311	91.892	1
apkc_sibling_Ecad-mCh	Ecad-mCh	head 10	cell 3	head 10cell 3	2	113.256	316.88	162.638	140.457	1431.566	91.892	1
apkc_sibling_Ecad-mCh	Ecad-mCh	head 10	cell 3	head 10cell 3	3	113.256	500.052	319.993	147.088	2837.009	91.892	1
apkc_sibling_Ecad-mCh	Ecad-mCh	head 10	cell 3	head 10cell 3	4	113.256	542.315	337.739	147.549	3450.253	91.892	1
apkc_sibling_Ecad-mCh	Ecad-mCh	head 10	cell 3	head 10cell 3	5	113.256	532.613	332.027	148	3368.736	91.892	1
apkc_sibling_Ecad-mCh	Ecad-mCh	head 10	cell 3	head 10cell 3	6	113.256	537.47	328.21	147.352	3114.609	91.892	1
apkc_sibling_Ecad-mCh	Ecad-mCh	head 10	cell 3	head 10cell 3	7	113.256	544.996	329.704	144.637	3294.11	91.892	1
apkc_sibling_Ecad-mCh	Ecad-mCh	head 10	cell 3	head 10cell 3	8	115.849	605.969	328.562	137.51	2843.038	94	1
apkc_sibling_Ecad-mCh	Ecad-mCh	head 10	cell 3	head 10cell 3	9	115.849	676.87	359.789	153.834	2448.708	94	1
apkc_sibling_Ecad-mCh	Ecad-mCh	head 10	cell 3	head 10cell 3	10	115.849	685.544	336.768	161.356	2370.194	94	1
apkc_sibling_Ecad-mCh	Ecad-mCh	head 10	cell 3	head 10cell 3	11	110.014	672.275	331.844	149.18	2020.244	89.256	1
apkc_sibling_Ecad-mCh	Ecad-mCh	head 10	cell 3	head 10cell 3	12	110.014	643.274	316.387	168.941	2190.794	89.256	1
apkc_sibling_Ecad-mCh	Ecad-mCh	head 10	cell 3	head 10cell 3	13	82.997	644.334	333.887	151.107	2809.147	67.296	1
apkc_sibling_Ecad-mCh	Ecad-mCh	head 10	cell 3	head 10cell 3	14	83.213	624.928	321.691	156.113	2369.668	67.472	1
apkc_sibling_Ecad-mCh	Ecad-mCh	head 10	cell 3	head 10cell 3	15	59.005	558.137	279.838	171.792	2137.167	47.793	1
apkc_sibling_Ecad-mCh	Ecad-mCh	head 10	cell 3	head 10cell 3	16	23.991	631.231	309.795	153.62	1774.083	19.329	1
apkc_sibling_Ecad-mCh	Ecad-mCh	head 10	cell 3	head 10cell 3	17	19.02	656.051	250.679	241.547	1644.033	15.286	1
apkc_sibling_Ecad-mCh	Ecad-mCh	head 10	cell 3	head 10cell 3	18	9.726	677.953	228.507	239.768	1328.204	7.732	1
apkc_sibling_Ecad-mCh	Ecad-mCh	head 10	cell 4	head 10cell 4	1	101.584	287.414	141.602	143.546	1108.589	82.4	1
apkc_sibling_Ecad-mCh	Ecad-mCh	head 10	cell 4	head 10cell 4	2	101.584	447.913	286.887	144.419	2041.282	82.4	1
apkc_sibling_Ecad-mCh	Ecad-mCh	head 10	cell 4	head 10cell 4	3	101.584	537.006	320.962	143.837	3220.622	82.4	1
apkc_sibling_Ecad-mCh	Ecad-mCh	head 10	cell 4	head 10cell 4	4	101.584	530.74	323.642	147.943	3046.632	82.4	1
apkc_sibling_Ecad-mCh	Ecad-mCh	head 10	cell 4	head 10cell 4	5	101.584	541.359	319.744	147.375	3255.069	82.4	1
apkc_sibling_Ecad-mCh	Ecad-mCh	head 10	cell 4	head 10cell 4	6	100.071	595.698	295.84	150.154	2391.994	81.173	1
apkc_sibling_Ecad-mCh	Ecad-mCh	head 10	cell 4	head 10cell 4	7	100.071	604.55	294.66	150.943	2939.076	81.173	1
apkc_sibling_Ecad-mCh	Ecad-mCh	head 10	cell 4	head 10cell 4	8	100.071	612.022	317.292	156.669	2937.355	81.173	1
apkc_sibling_Ecad-mCh	Ecad-mCh	head 10	cell 4	head 10cell 4	9	97.262	685.985	330.215	167.969	2496.292	78.891	1
apkc_sibling_Ecad-mCh	Ecad-mCh	head 10	cell 4	head 10cell 4	10	97.262	695.393	315.304	152.053	2310.402	78.891	1
apkc_sibling_Ecad-mCh	Ecad-mCh	head 10	cell 4	head 10cell 4	11	97.262	689.678	296.72	182.868	1882.109	78.891	1
apkc_sibling_Ecad-mCh	Ecad-mCh	head 10	cell 4	head 10cell 4	12	97.262	673.488	283.821	157.854	2010.606	78.891	1
apkc_sibling_Ecad-mCh	Ecad-mCh	head 10	cell 4	head 10cell 4	13	86.239	650.489	318.509	159.273	2659.78	69.933	1
apkc_sibling_Ecad-mCh	Ecad-mCh	head 10	cell 4	head 10cell 4	14	51.657	654.379	297.902	170.597	1752.054	41.819	1
apkc_sibling_Ecad-mCh	Ecad-mCh	head 10	cell 4	head 10cell 4	15	49.279	653.236	276.558	158.073	1640.122	39.886	1
apkc_sibling_Ecad-mCh	Ecad-mCh	head 10	cell 4	head 10cell 4	16	29.827	617.57	267.431	196.038	1728.391	24.073	1
apkc_sibling_Ecad-mCh	Ecad-mCh	head 10	cell 4	head 10cell 4	17	28.53	614.966	265.226	185.778	1808.334	23.019	1
apkc_sibling_Ecad-mCh	Ecad-mCh	head 10	cell 4	head 10cell 4	18	27.666	586.398	246.559	183.966	1658.67	22.316	1
apkc_sibling_Ecad-mCh	Ecad-mCh	head 11	cell 1	head 11cell 1	1	95.965	238.9	69.766	136.583	690.473	77.839	1
apkc_sibling_Ecad-mCh	Ecad-mCh	head 11	cell 1	head 11cell 1	2	95.965	250.54	86.058	142.429	867.795	77.839	1
apkc_sibling_Ecad-mCh	Ecad-mCh	head 11	cell 1	head 11cell 1	3	95.965	278.725	112.985	144.517	918.82	77.839	1
apkc_sibling_Ecad-mCh	Ecad-mCh	head 11	cell 1	head 11cell 1	4	95.965	329.141	159.415	141.081	1123.897	77.839	1
apkc_sibling_Ecad-mCh	Ecad-mCh	head 11	cell 1	head 11cell 1	5	96.181	439.667	220.81	143.85	1502.652	78.01	1
apkc_sibling_Ecad-mCh	Ecad-mCh	head 11	cell 1	head 11cell 1	6	96.181	496.632	262.165	144.276	2123.136	78.01	1
apkc_sibling_Ecad-mCh	Ecad-mCh	head 11	cell 1	head 11cell 1	7	96.181	574.832	296.736	148.003	2547.308	78.01	1
apkc_sibling_Ecad-mCh	Ecad-mCh	head 11	cell 1	head 11cell 1	8	96.181	586.908	289.103	148.133	3074.765	78.01	1
apkc_sibling_Ecad-mCh	Ecad-mCh	head 11	cell 1	head 11cell 1	9	93.803	609.433	271.81	152.187	2582.442	76.082	1
apkc_sibling_Ecad-mCh	Ecad-mCh	head 11	cell 1	head 11cell 1	10	93.803	655.961	303.487	151.987	3089.924	76.082	1
apkc_sibling_Ecad-mCh	Ecad-mCh	head 11	cell 1	head 11cell 1	11	93.803	712.301	343.723	148.749	2358.126	76.082	1
apkc_sibling_Ecad-mCh	Ecad-mCh	head 11	cell 1	head 11cell 1	12	93.803	724.658	359.213	154.774	2497.798	76.082	1
apkc_sibling_Ecad-mCh	Ecad-mCh	head 11	cell 1	head 11cell 1	13	93.155	752.801	355.704	149.213	2429.81	75.554	1
apkc_sibling_Ecad-mCh	Ecad-mCh	head 11	cell 1	head 11cell 1	14	90.561	755.739	308.342	222.165	2412.813	73.447	1
apkc_sibling_Ecad-mCh	Ecad-mCh	head 11	cell 1	head 11cell 1	15	77.161	698.112	258.081	200.186	2286.279	62.551	1
apkc_sibling_Ecad-mCh	Ecad-mCh	head 11	cell 1	head 11cell 1	16	71.974	598.95	232.595	156.438	1995.795	58.299	1
apkc_sibling_Ecad-mCh	Ecad-mCh	head 11	cell 2	head 11cell 2	1	111.743	289.243	109.356	142.433	953.408	90.649	1
apkc_sibling_Ecad-mCh	Ecad-mCh	head 11	cell 2	head 11cell 2	2	111.743	354.551	162.177	147.269	1252.211	90.649	1
apkc_sibling_Ecad-mCh	Ecad-mCh	head 11	cell 2	head 11cell 2	3	111.743	415.342	202.997	145.063	1474.525	90.649	1
apkc_sibling_Ecad-mCh	Ecad-mCh	head 11	cell 2	head 11cell 2	4	111.743	536.74	266.5	148.955	2201.831	90.659	1
apkc_sibling_Ecad-mCh	Ecad-mCh	head 11	cell 2	head 11cell 2	5	111.743	601.584	294.756	153.283	2845.19	90.659	1
apkc_sibling_Ecad-mCh	Ecad-mCh	head 11	cell 2	head 11cell 2	6	111.743	649.26	315.087	155.152	3310.95	90.659	1
apkc_sibling_Ecad-mCh	Ecad-mCh	head 11	cell 2	head 11cell 2	7	111.743	678.999	313.823	167.934	2820.048	90.659	1
apkc_sibling_Ecad-mCh	Ecad-mCh	head 11	cell 2	head 11cell 2	8	110.23	753.846	354.192	161.391	2615.233	89.432	1
apkc_sibling_Ecad-mCh	Ecad-mCh	head 11	cell 2	head 11cell 2	9	110.23	751.278	362.635	173.408	2716.624	89.432	1
apkc_sibling_Ecad-mCh	Ecad-mCh	head 11	cell 2	head 11cell 2	10	107.42	776.319	355.96	217.888	2686.016	87.147	1
apkc_sibling_Ecad-mCh	Ecad-mCh	head 11	cell 2	head 11cell 2	11	107.42	810.012	347.931	168.675	2479.556	87.147	1
apkc_sibling_Ecad-mCh	Ecad-mCh	head 11	cell 2	head 11cell 2	12	107.42	752.001	328.962	208.253	2542.694	87.147	1
apkc_sibling_Ecad-mCh	Ecad-mCh	head 11	cell 2	head 11cell 2	13	94.668	724.977	331.278	181.706	2480.177	76.782	1
apkc_sibling_Ecad-mCh	Ecad-mCh	head 11	cell 2	head 11cell 2	14	42.147	694.529	230.028	173.839	1739.203	34.084	1
apkc_sibling_Ecad-mCh	Ecad-mCh	head 11	cell 2	head 11cell 2	15	28.098	706.722	215.33	282.879	1504.62	22.666	1
apkc_sibling_Ecad-mCh	Ecad-mCh	head 11	cell 2	head 11cell 2	16	23.559	693.449	202.983	273.088	1481.652	18.977	1
apkc_sibling_Ecad-mCh	Ecad-mCh	head 11	cell 2	head 11cell 2	17	8.213	710.473	157.486	341.933	1327.343	6.501	1
apkc_sibling_Ecad-mCh	Ecad-mCh	head 11	cell 3	head 11cell 3	1	101.584	234.287	64.424	143.941	687.794	82.398	1
apkc_sibling_Ecad-mCh	Ecad-mCh	head 11	cell 3	head 11cell 3	2	101.584	259.578	80.376	141.645	732.613	82.398	1
apkc_sibling_Ecad-mCh	Ecad-mCh	head 11	cell 3	head 11cell 3	3	101.584	309.906	121.798	144.724	968.379	82.398	1
apkc_sibling_Ecad-mCh	Ecad-mCh	head 11	cell 3	head 11cell 3	4	101.584	385.417	189.328	144.973	1644.859	82.398	1
apkc_sibling_Ecad-mCh	Ecad-mCh	head 11	cell 3	head 11cell 3	5	102.881	461.601	248.269	148.851	2164.894	83.451	1
apkc_sibling_Ecad-mCh	Ecad-mCh	head 11	cell 3	head 11cell 3	6	102.881	577.12	319.488	149.173	2724.678	83.451	1
apkc_sibling_Ecad-mCh	Ecad-mCh	head 11	cell 3	head 11cell 3	7	102.881	612.033	326.52	159.529	2701.378	83.451	1
apkc_sibling_Ecad-mCh	Ecad-mCh	head 11	cell 3	head 11cell 3	8	102.881	645.505	335.383	156.282	2986.969	83.451	1
apkc_sibling_Ecad-mCh	Ecad-mCh	head 11	cell 3	head 11cell 3	9	102.881	653.807	324.014	170.724	2415.595	83.451	1
apkc_sibling_Ecad-mCh	Ecad-mCh	head 11	cell 3	head 11cell 3	10	98.991	764.36	390.267	179.772	3012.663	80.297	1
apkc_sibling_Ecad-mCh	Ecad-mCh	head 11	cell 3	head 11cell 3	11	98.991	782.157	404.771	166.452	3444.038	80.297	1
apkc_sibling_Ecad-mCh	Ecad-mCh	head 11	cell 3	head 11cell 3	12	98.991	790.083	402.696	148.51	2717.325	80.297	1
apkc_sibling_Ecad-mCh	Ecad-mCh	head 11	cell 3	head 11cell 3	13	98.991	806.033	413.746	198.315	2833.268	80.297	1
apkc_sibling_Ecad-mCh	Ecad-mCh	head 11	cell 3	head 11cell 3	14	98.991	721.492	334.468	190.371	2763.123	80.297	1
apkc_sibling_Ecad-mCh	Ecad-mCh	head 11	cell 3	head 11cell 3	15	88.832	676.008	290.65	200.193	2811.605	72.042	1
apkc_sibling_Ecad-mCh	Ecad-mCh	head 11	cell 3	head 11cell 3	16	31.772	611.47	227.188	204.069	1726.832	25.654	1
apkc_sibling_Ecad-mCh	Ecad-mCh	head 11	cell 3	head 11cell 3	17	25.936	610.135	219.19	215.255	1428.568	20.91	1
apkc_sibling_Ecad-mCh	Ecad-mCh	head 12	cell 1	head 12cell 1	1	93.155	294.281	128.572	130.51	1203.837	75.554	1
apkc_sibling_Ecad-mCh	Ecad-mCh	head 12	cell 1	head 12cell 1	2	93.155	355.066	185.728	148.514	1685.37	75.554	1
apkc_sibling_Ecad-mCh	Ecad-mCh	head 12	cell 1	head 12cell 1	3	93.155	537.735	317.99	146.546	2324.979	75.554	1
apkc_sibling_Ecad-mCh	Ecad-mCh	head 12	cell 1	head 12cell 1	4	93.155	671.057	404.042	154.651	3398.586	75.554	1
apkc_sibling_Ecad-mCh	Ecad-mCh	head 12	cell 1	head 12cell 1	5	93.155	701.124	380.009	166.981	3020.687	75.554	1
apkc_sibling_Ecad-mCh	Ecad-mCh	head 12	cell 1	head 12cell 1	6	92.507	685.832	363.121	159.597	3342.385	75.026	1
apkc_sibling_Ecad-mCh	Ecad-mCh	head 12	cell 1	head 12cell 1	7	92.507	705.855	366.048	158.783	3078.379	75.026	1
apkc_sibling_Ecad-mCh	Ecad-mCh	head 12	cell 1	head 12cell 1	8	92.939	815.907	440.273	154.797	2931.61	75.38	1
apkc_sibling_Ecad-mCh	Ecad-mCh	head 12	cell 1	head 12cell 1	9	92.939	857.65	457.261	184.579	3132.044	75.38	1
apkc_sibling_Ecad-mCh	Ecad-mCh	head 12	cell 1	head 12cell 1	10	91.642	886.544	433.879	192.21	2599.956	74.325	1
apkc_sibling_Ecad-mCh	Ecad-mCh	head 12	cell 1	head 12cell 1	11	91.642	786.182	330.556	215.608	2267.812	74.325	1
apkc_sibling_Ecad-mCh	Ecad-mCh	head 12	cell 1	head 12cell 1	12	76.945	636.212	228.03	196.157	1765.289	62.378	1
apkc_sibling_Ecad-mCh	Ecad-mCh	head 12	cell 1	head 12cell 1	13	12.968	680.295	194.531	250.344	1441.611	10.367	1
apkc_sibling_Ecad-mCh	Ecad-mCh	head 12	cell 2	head 12cell 2	1	93.155	233.556	64.804	138.762	569.365	75.551	1
apkc_sibling_Ecad-mCh	Ecad-mCh	head 12	cell 2	head 12cell 2	2	93.155	270.992	99.07	147.352	751.128	75.551	1
apkc_sibling_Ecad-mCh	Ecad-mCh	head 12	cell 2	head 12cell 2	3	92.507	419.615	231.954	146.994	1495.445	75.026	1
apkc_sibling_Ecad-mCh	Ecad-mCh	head 12	cell 2	head 12cell 2	4	92.507	582.586	361.85	146.131	2543.315	75.026	1
apkc_sibling_Ecad-mCh	Ecad-mCh	head 12	cell 2	head 12cell 2	5	92.507	659.286	407.612	149.854	3320.115	75.026	1
apkc_sibling_Ecad-mCh	Ecad-mCh	head 12	cell 2	head 12cell 2	6	92.507	709.716	457.436	160.414	4075.794	75.026	1
apkc_sibling_Ecad-mCh	Ecad-mCh	head 12	cell 2	head 12cell 2	7	91.21	757.641	406.362	174.49	3767.641	73.972	1
apkc_sibling_Ecad-mCh	Ecad-mCh	head 12	cell 2	head 12cell 2	8	91.21	796.992	473.24	156.53	4039.952	73.972	1
apkc_sibling_Ecad-mCh	Ecad-mCh	head 12	cell 2	head 12cell 2	9	90.994	911.307	477.244	169.898	4080.757	73.798	1
apkc_sibling_Ecad-mCh	Ecad-mCh	head 12	cell 2	head 12cell 2	10	90.994	914.228	463.995	181.071	4091.423	73.798	1
apkc_sibling_Ecad-mCh	Ecad-mCh	head 12	cell 2	head 12cell 2	11	92.29	812.756	326.602	224.93	2386.47	74.85	1
apkc_sibling_Ecad-mCh	Ecad-mCh	head 12	cell 2	head 12cell 2	12	92.29	608.127	246.276	164.009	3495.404	74.85	1
apkc_sibling_Ecad-mCh	Ecad-mCh	head 12	cell 3	head 12cell 3	1	91.858	226.524	59.386	142.868	694.345	74.392	1
apkc_sibling_Ecad-mCh	Ecad-mCh	head 12	cell 3	head 12cell 3	2	91.858	259.037	81.294	142.617	726.34	74.392	1
apkc_sibling_Ecad-mCh	Ecad-mCh	head 12	cell 3	head 12cell 3	3	91.858	395.245	205.573	145.405	1855.628	74.392	1
apkc_sibling_Ecad-mCh	Ecad-mCh	head 12	cell 3	head 12cell 3	4	91.858	596.228	405.567	144.746	3691.48	74.392	1
apkc_sibling_Ecad-mCh	Ecad-mCh	head 12	cell 3	head 12cell 3	5	91.21	734.773	441.68	166.667	3920.787	73.963	1
apkc_sibling_Ecad-mCh	Ecad-mCh	head 12	cell 3	head 12cell 3	6	91.21	737.324	409.798	177.36	3358.004	73.963	1
apkc_sibling_Ecad-mCh	Ecad-mCh	head 12	cell 3	head 12cell 3	7	91.21	758.371	411.171	148.851	3424.087	73.963	1
apkc_sibling_Ecad-mCh	Ecad-mCh	head 12	cell 3	head 12cell 3	8	89.481	909.769	439.484	176.586	3071.038	72.567	1
apkc_sibling_Ecad-mCh	Ecad-mCh	head 12	cell 3	head 12cell 3	9	89.697	957.966	472.57	181.061	3453.965	72.743	1
apkc_sibling_Ecad-mCh	Ecad-mCh	head 12	cell 3	head 12cell 3	10	90.777	1032.621	486.478	174.639	3105.07	73.618	1
apkc_sibling_Ecad-mCh	Ecad-mCh	head 12	cell 3	head 12cell 3	11	91.642	913.578	396.371	219.168	2465.694	74.323	1
apkc_sibling_Ecad-mCh	Ecad-mCh	head 12	cell 3	head 12cell 3	12	25.504	792.925	295.794	274.121	2019.647	20.558	1
apkc_sibling_Ecad-mCh	Ecad-mCh	head 12	cell 4	head 12cell 4	1	82.997	212.605	47.708	142.196	483.33	67.296	1
apkc_sibling_Ecad-mCh	Ecad-mCh	head 12	cell 4	head 12cell 4	2	82.997	228.277	58.2	140.223	586.354	67.296	1
apkc_sibling_Ecad-mCh	Ecad-mCh	head 12	cell 4	head 12cell 4	3	82.997	279.138	97.385	142.727	1003.51	67.296	1
apkc_sibling_Ecad-mCh	Ecad-mCh	head 12	cell 4	head 12cell 4	4	82.997	390.783	201.59	146.856	1602.492	67.296	1
apkc_sibling_Ecad-mCh	Ecad-mCh	head 12	cell 4	head 12cell 4	5	83.861	609.541	411.567	144.563	2455.161	67.997	1
apkc_sibling_Ecad-mCh	Ecad-mCh	head 12	cell 4	head 12cell 4	6	83.861	708.368	473.571	150.766	3845.161	67.997	1
apkc_sibling_Ecad-mCh	Ecad-mCh	head 12	cell 4	head 12cell 4	7	83.861	700.735	441.339	169.441	3669.223	67.997	1
apkc_sibling_Ecad-mCh	Ecad-mCh	head 12	cell 4	head 12cell 4	8	83.861	697.133	440.069	143.229	3754.433	67.997	1
apkc_sibling_Ecad-mCh	Ecad-mCh	head 12	cell 4	head 12cell 4	9	82.564	773.648	457.276	149.267	3467.989	66.945	1
apkc_sibling_Ecad-mCh	Ecad-mCh	head 12	cell 4	head 12cell 4	10	82.564	812.381	515.979	154.741	3277.128	66.945	1
apkc_sibling_Ecad-mCh	Ecad-mCh	head 12	cell 4	head 12cell 4	11	81.484	1006.497	585.044	191.582	3228.985	66.067	1
apkc_sibling_Ecad-mCh	Ecad-mCh	head 12	cell 4	head 12cell 4	12	81.484	1021.602	596.833	183.576	3488.673	66.067	1
apkc_sibling_Ecad-mCh	Ecad-mCh	head 12	cell 4	head 12cell 4	13	82.564	902.502	406.107	210.576	2957.927	66.945	1
apkc_sibling_Ecad-mCh	Ecad-mCh	head 12	cell 4	head 12cell 4	14	82.564	740.129	297.231	252.941	2299.019	66.945	1
apkc_sibling_Ecad-mCh	Ecad-mCh	head 12	cell 4	head 12cell 4	15	22.046	734.672	242.132	231.229	1903.957	17.746	1
apkc_sibling_Ecad-mCh	Ecad-mCh	head 12	cell 4	head 12cell 4	16	22.262	674.099	228.623	258.876	1837.017	17.922	1
apkc_sibling_Ecad-mCh	Ecad-mCh	head 12	cell 5	head 12cell 5	1	103.53	217.977	53.712	141.57	511.439	83.988	1
apkc_sibling_Ecad-mCh	Ecad-mCh	head 12	cell 5	head 12cell 5	2	103.53	253.155	87.322	141.013	768.362	83.988	1
apkc_sibling_Ecad-mCh	Ecad-mCh	head 12	cell 5	head 12cell 5	3	103.53	325.618	163.414	136.214	1432.625	83.988	1
apkc_sibling_Ecad-mCh	Ecad-mCh	head 12	cell 5	head 12cell 5	4	103.53	481.607	309.951	133.097	2374.711	83.988	1
apkc_sibling_Ecad-mCh	Ecad-mCh	head 12	cell 5	head 12cell 5	5	103.746	599.375	361.705	141.115	3343.881	84.164	1
apkc_sibling_Ecad-mCh	Ecad-mCh	head 12	cell 5	head 12cell 5	6	103.746	658.86	360.423	157.297	3224.16	84.164	1
apkc_sibling_Ecad-mCh	Ecad-mCh	head 12	cell 5	head 12cell 5	7	103.746	664.152	348.377	161.255	3277.889	84.164	1
apkc_sibling_Ecad-mCh	Ecad-mCh	head 12	cell 5	head 12cell 5	8	102.017	744.512	368.63	153.77	3919.284	82.76	1
apkc_sibling_Ecad-mCh	Ecad-mCh	head 12	cell 5	head 12cell 5	9	102.017	797.56	410.071	180.137	3813.193	82.76	1
apkc_sibling_Ecad-mCh	Ecad-mCh	head 12	cell 5	head 12cell 5	10	102.017	826.834	438.524	173.087	3215.387	82.76	1
apkc_sibling_Ecad-mCh	Ecad-mCh	head 12	cell 5	head 12cell 5	11	104.61	944.387	459.535	199.483	3387.657	84.867	1
apkc_sibling_Ecad-mCh	Ecad-mCh	head 12	cell 5	head 12cell 5	12	104.61	888.648	399.172	212.953	3140.375	84.867	1
apkc_sibling_Ecad-mCh	Ecad-mCh	head 12	cell 5	head 12cell 5	13	29.178	875.771	326.882	327.245	2064.935	23.546	1
apkc_sibling_Ecad-mCh	Ecad-mCh	head 12	cell 5	head 12cell 5	14	23.775	730.695	297.876	194.739	1646.104	19.153	1
apkc_sibling_Ecad-mCh	Ecad-mCh	head 13	cell 1	head 13cell 1	1	108.068	239.029	98.027	134.052	1068.641	87.677	1
apkc_sibling_Ecad-mCh	Ecad-mCh	head 13	cell 1	head 13cell 1	2	108.068	289.883	136.773	146.764	1279.267	87.677	1
apkc_sibling_Ecad-mCh	Ecad-mCh	head 13	cell 1	head 13cell 1	3	108.068	307.697	136.499	145.109	1136.417	87.677	1
apkc_sibling_Ecad-mCh	Ecad-mCh	head 13	cell 1	head 13cell 1	4	108.068	325.352	135.845	135.901	1377.063	87.677	1
apkc_sibling_Ecad-mCh	Ecad-mCh	head 13	cell 1	head 13cell 1	5	108.285	333.346	139.782	146.133	1228.761	87.847	1
apkc_sibling_Ecad-mCh	Ecad-mCh	head 13	cell 1	head 13cell 1	6	108.285	347.519	145.69	140.437	1242.338	87.847	1
apkc_sibling_Ecad-mCh	Ecad-mCh	head 13	cell 1	head 13cell 1	7	108.717	355.219	154.905	137.339	1192.326	88.204	1
apkc_sibling_Ecad-mCh	Ecad-mCh	head 13	cell 1	head 13cell 1	8	108.717	375.015	165.346	149.505	1286.193	88.204	1
apkc_sibling_Ecad-mCh	Ecad-mCh	head 13	cell 1	head 13cell 1	9	108.717	380.076	162.206	145.409	1262.452	88.204	1
apkc_sibling_Ecad-mCh	Ecad-mCh	head 13	cell 1	head 13cell 1	10	107.852	380.731	145.772	0	1138.65	87.503	1
apkc_sibling_Ecad-mCh	Ecad-mCh	head 13	cell 1	head 13cell 1	11	107.852	369.48	127.245	0	954.121	87.503	1
apkc_sibling_Ecad-mCh	Ecad-mCh	head 13	cell 1	head 13cell 1	12	54.683	381.469	128.468	147.882	830.738	44.278	1
apkc_sibling_Ecad-mCh	Ecad-mCh	head 13	cell 1	head 13cell 1	13	23.559	375.943	121.897	148.994	913.363	18.976	1
apkc_sibling_Ecad-mCh	Ecad-mCh	head 13	cell 2	head 13cell 2	1	110.662	195.749	49.295	141.193	604.22	89.789	1
apkc_sibling_Ecad-mCh	Ecad-mCh	head 13	cell 2	head 13cell 2	2	110.662	207.886	63.572	134.6	692.432	89.789	1
apkc_sibling_Ecad-mCh	Ecad-mCh	head 13	cell 2	head 13cell 2	3	110.662	226.164	87.011	140.546	805.643	89.789	1
apkc_sibling_Ecad-mCh	Ecad-mCh	head 13	cell 2	head 13cell 2	4	108.501	330.14	167.264	140.833	1637.215	88.03	1
apkc_sibling_Ecad-mCh	Ecad-mCh	head 13	cell 2	head 13cell 2	5	108.501	400.09	223.324	144.92	2408.349	88.03	1
apkc_sibling_Ecad-mCh	Ecad-mCh	head 13	cell 2	head 13cell 2	6	108.501	402.622	204.402	143.665	1920.548	88.03	1
apkc_sibling_Ecad-mCh	Ecad-mCh	head 13	cell 2	head 13cell 2	7	106.988	425.286	208.114	146.848	2004.157	86.802	1
apkc_sibling_Ecad-mCh	Ecad-mCh	head 13	cell 2	head 13cell 2	8	106.988	450.328	209.172	148.945	1961.75	86.802	1
apkc_sibling_Ecad-mCh	Ecad-mCh	head 13	cell 2	head 13cell 2	9	108.285	505.451	237.958	149.353	2003.524	87.853	1
apkc_sibling_Ecad-mCh	Ecad-mCh	head 13	cell 2	head 13cell 2	10	108.285	515.956	241.334	148.874	2055.325	87.853	1
apkc_sibling_Ecad-mCh	Ecad-mCh	head 13	cell 2	head 13cell 2	11	108.285	514.691	237.677	147.064	1639.662	87.853	1
apkc_sibling_Ecad-mCh	Ecad-mCh	head 13	cell 2	head 13cell 2	12	108.285	444.408	186.23	148.971	1373.125	87.853	1
apkc_sibling_Ecad-mCh	Ecad-mCh	head 13	cell 2	head 13cell 2	13	25.288	403.168	169.051	149.337	1185.574	20.383	1
apkc_sibling_Ecad-mCh	Ecad-mCh	head 13	cell 2	head 13cell 2	14	20.101	386.159	131.051	151.314	978.329	16.166	1
apkc_sibling_Ecad-mCh	Ecad-mCh	head 14	cell 1	head 14cell 1	1	107.852	210.164	49.18	137.332	481.021	87.501	1
apkc_sibling_Ecad-mCh	Ecad-mCh	head 14	cell 1	head 14cell 1	2	107.852	257.853	88.358	144.916	777.824	87.501	1
apkc_sibling_Ecad-mCh	Ecad-mCh	head 14	cell 1	head 14cell 1	3	107.852	332.54	157.996	137.594	1104.897	87.501	1
apkc_sibling_Ecad-mCh	Ecad-mCh	head 14	cell 1	head 14cell 1	4	107.852	398.921	214.346	148.997	1835.922	87.501	1
apkc_sibling_Ecad-mCh	Ecad-mCh	head 14	cell 1	head 14cell 1	5	107.852	420.841	222.193	134.208	2570.233	87.501	1
apkc_sibling_Ecad-mCh	Ecad-mCh	head 14	cell 1	head 14cell 1	6	108.285	444.908	232.88	149.376	2667.15	87.853	1
apkc_sibling_Ecad-mCh	Ecad-mCh	head 14	cell 1	head 14cell 1	7	108.285	455.584	209.739	149.804	1968.12	87.853	1
apkc_sibling_Ecad-mCh	Ecad-mCh	head 14	cell 1	head 14cell 1	8	108.285	466.092	212.256	157.294	2101.225	87.853	1
apkc_sibling_Ecad-mCh	Ecad-mCh	head 14	cell 1	head 14cell 1	9	107.636	515.896	213.424	156.329	2063.748	87.326	1
apkc_sibling_Ecad-mCh	Ecad-mCh	head 14	cell 1	head 14cell 1	10	107.636	577.134	248.626	156.215	1740.255	87.326	1
apkc_sibling_Ecad-mCh	Ecad-mCh	head 14	cell 1	head 14cell 1	11	107.636	581.33	248.952	154.35	1825.892	87.325	1
apkc_sibling_Ecad-mCh	Ecad-mCh	head 14	cell 1	head 14cell 1	12	106.988	613.109	249.745	148.215	1951.661	86.797	1
apkc_sibling_Ecad-mCh	Ecad-mCh	head 14	cell 1	head 14cell 1	13	106.988	588.543	228.733	178.488	1692.423	86.797	1
apkc_sibling_Ecad-mCh	Ecad-mCh	head 14	cell 1	head 14cell 1	14	67.651	592.521	217.754	166.193	1571.821	54.821	1
apkc_sibling_Ecad-mCh	Ecad-mCh	head 14	cell 1	head 14cell 1	15	36.959	556.272	196.03	165.093	1518.675	29.869	1
apkc_sibling_Ecad-mCh	Ecad-mCh	head 14	cell 2	head 14cell 2	1	125.359	204.306	45.708	142.597	537.858	101.732	1
apkc_sibling_Ecad-mCh	Ecad-mCh	head 14	cell 2	head 14cell 2	2	125.359	236.927	73.948	142.653	846.947	101.732	1
apkc_sibling_Ecad-mCh	Ecad-mCh	head 14	cell 2	head 14cell 2	3	124.495	306.146	143.589	138.267	1262.542	101.029	1
apkc_sibling_Ecad-mCh	Ecad-mCh	head 14	cell 2	head 14cell 2	4	124.495	363.502	196.2	137.681	1586.036	101.029	1
apkc_sibling_Ecad-mCh	Ecad-mCh	head 14	cell 2	head 14cell 2	5	124.495	391.375	208.908	141.976	2565.483	101.029	1
apkc_sibling_Ecad-mCh	Ecad-mCh	head 14	cell 2	head 14cell 2	6	124.495	403.352	203.372	143.738	2944.915	101.029	1
apkc_sibling_Ecad-mCh	Ecad-mCh	head 14	cell 2	head 14cell 2	7	124.495	420.772	207.151	149.215	2492.816	101.029	1
apkc_sibling_Ecad-mCh	Ecad-mCh	head 14	cell 2	head 14cell 2	8	124.495	442.452	213.374	143.438	2523.566	101.029	1
apkc_sibling_Ecad-mCh	Ecad-mCh	head 14	cell 2	head 14cell 2	9	121.685	495.536	235.823	151.705	2041.918	98.748	1
apkc_sibling_Ecad-mCh	Ecad-mCh	head 14	cell 2	head 14cell 2	10	121.685	506.038	235.417	149.267	1802.114	98.748	1
apkc_sibling_Ecad-mCh	Ecad-mCh	head 14	cell 2	head 14cell 2	11	120.604	465.339	203.154	149.268	1456.122	97.87	1
apkc_sibling_Ecad-mCh	Ecad-mCh	head 14	cell 2	head 14cell 2	12	81.484	461.797	186.104	155.059	1454.713	66.067	1
apkc_sibling_Ecad-mCh	Ecad-mCh	head 14	cell 2	head 14cell 2	13	13.617	603.923	197.514	257.892	1378.382	10.894	1
apkc_sibling_Ecad-mCh	Ecad-mCh	head 14	cell 3	head 14cell 3	1	127.305	189.713	37.408	140.125	545.949	103.301	1
apkc_sibling_Ecad-mCh	Ecad-mCh	head 14	cell 3	head 14cell 3	2	127.305	234.527	76.05	142.279	665.873	103.301	1
apkc_sibling_Ecad-mCh	Ecad-mCh	head 14	cell 3	head 14cell 3	3	127.305	290.952	136.839	142.384	1242.2	103.301	1
apkc_sibling_Ecad-mCh	Ecad-mCh	head 14	cell 3	head 14cell 3	4	127.305	313.722	156.961	139.893	1941.21	103.301	1
apkc_sibling_Ecad-mCh	Ecad-mCh	head 14	cell 3	head 14cell 3	5	127.305	326.425	157.839	144.21	1656.754	103.301	1
apkc_sibling_Ecad-mCh	Ecad-mCh	head 14	cell 3	head 14cell 3	6	127.305	332.043	159.256	141.773	1853.803	103.301	1
apkc_sibling_Ecad-mCh	Ecad-mCh	head 14	cell 3	head 14cell 3	7	127.305	347.257	162.097	135.719	1816.637	103.301	1
apkc_sibling_Ecad-mCh	Ecad-mCh	head 14	cell 3	head 14cell 3	8	124.711	380.411	171.946	142.839	1441.109	101.209	1
apkc_sibling_Ecad-mCh	Ecad-mCh	head 14	cell 3	head 14cell 3	9	124.711	412.193	182.988	147.764	1560.432	101.209	1
apkc_sibling_Ecad-mCh	Ecad-mCh	head 14	cell 3	head 14cell 3	10	126.224	405.266	170.583	148.138	1288.735	102.438	1
apkc_sibling_Ecad-mCh	Ecad-mCh	head 14	cell 3	head 14cell 3	11	126.44	402.547	162.453	145.762	1315.603	102.612	1
apkc_sibling_Ecad-mCh	Ecad-mCh	head 14	cell 3	head 14cell 3	12	51.657	375.655	138.348	147.39	1196.245	41.82	1
apkc_sibling_Ecad-mCh	Ecad-mCh	head 14	cell 3	head 14cell 3	13	26.153	394.305	133.792	152.67	1067.302	21.086	1
apkc_sibling_Ecad-mCh	Ecad-mCh	head 14	cell 4	head 14cell 4	1	96.181	201.35	44.05	140.191	458.471	78.015	1
apkc_sibling_Ecad-mCh	Ecad-mCh	head 14	cell 4	head 14cell 4	2	96.181	258.974	98.352	141.256	872.777	78.015	1
apkc_sibling_Ecad-mCh	Ecad-mCh	head 14	cell 4	head 14cell 4	3	96.181	329.688	164.809	143.265	1440.763	78.015	1
apkc_sibling_Ecad-mCh	Ecad-mCh	head 14	cell 4	head 14cell 4	4	96.181	383.673	224.266	146.302	1789.986	78.015	1
apkc_sibling_Ecad-mCh	Ecad-mCh	head 14	cell 4	head 14cell 4	5	96.181	422.693	246.564	143.799	2248.965	78.015	1
apkc_sibling_Ecad-mCh	Ecad-mCh	head 14	cell 4	head 14cell 4	6	96.181	420.146	224.644	149.009	1924.905	78.015	1
apkc_sibling_Ecad-mCh	Ecad-mCh	head 14	cell 4	head 14cell 4	7	96.181	428.974	211.97	147.465	1736.471	78.015	1
apkc_sibling_Ecad-mCh	Ecad-mCh	head 14	cell 4	head 14cell 4	8	96.181	433.275	211.781	148.144	2115.385	78.015	1
apkc_sibling_Ecad-mCh	Ecad-mCh	head 14	cell 4	head 14cell 4	9	95.532	479.291	211.163	148.79	1543.564	77.486	1
apkc_sibling_Ecad-mCh	Ecad-mCh	head 14	cell 4	head 14cell 4	10	95.532	512.394	235.329	147.878	2098.857	77.486	1
apkc_sibling_Ecad-mCh	Ecad-mCh	head 14	cell 4	head 14cell 4	11	95.532	510.08	238.585	149.015	1722.809	77.486	1
apkc_sibling_Ecad-mCh	Ecad-mCh	head 14	cell 4	head 14cell 4	12	95.532	477.295	217.522	150.016	1716.53	77.486	1
apkc_sibling_Ecad-mCh	Ecad-mCh	head 14	cell 4	head 14cell 4	13	50.36	532.282	214.239	158.105	1691.169	40.765	1
apkc_sibling_Ecad-mCh	Ecad-mCh	head 14	cell 4	head 14cell 4	14	38.905	522.628	212.585	161.438	1434.055	31.452	1
apkc_sibling_Ecad-mCh	Ecad-mCh	head 14	cell 4	head 14cell 4	15	35.446	495.25	201.207	149.284	1296.39	28.641	1
apkc_sibling_Ecad-mCh	Ecad-mCh	head 14	cell 4	head 14cell 4	16	12.32	552.332	181.233	185.269	1176.307	9.84	1
apkc_sibling_Ecad-mCh	Ecad-mCh	head 15	cell 1	head 15cell 1	1	86.887	202.616	49.533	140.439	595.274	70.459	1
apkc_sibling_Ecad-mCh	Ecad-mCh	head 15	cell 1	head 15cell 1	2	86.887	218.96	62.059	138.782	700.105	70.459	1
apkc_sibling_Ecad-mCh	Ecad-mCh	head 15	cell 1	head 15cell 1	3	86.887	256.527	97.328	144.821	1265.077	70.459	1
apkc_sibling_Ecad-mCh	Ecad-mCh	head 15	cell 1	head 15cell 1	4	86.887	290.811	124.299	140.387	1206.079	70.459	1
apkc_sibling_Ecad-mCh	Ecad-mCh	head 15	cell 1	head 15cell 1	5	86.887	348.604	171.109	144.675	1913.407	70.459	1
apkc_sibling_Ecad-mCh	Ecad-mCh	head 15	cell 1	head 15cell 1	6	86.887	387.72	191.82	147.362	1789.105	70.459	1
apkc_sibling_Ecad-mCh	Ecad-mCh	head 15	cell 1	head 15cell 1	7	86.887	402.781	190.767	146.833	1580.824	70.459	1
apkc_sibling_Ecad-mCh	Ecad-mCh	head 15	cell 1	head 15cell 1	8	86.887	425.551	213.884	149.195	2266.31	70.459	1
apkc_sibling_Ecad-mCh	Ecad-mCh	head 15	cell 1	head 15cell 1	9	84.726	459.783	214.664	147.059	1758.058	68.702	1
apkc_sibling_Ecad-mCh	Ecad-mCh	head 15	cell 1	head 15cell 1	10	84.726	488.217	219.425	147.657	1636.416	68.702	1
apkc_sibling_Ecad-mCh	Ecad-mCh	head 15	cell 1	head 15cell 1	11	84.726	503.953	230.944	154.239	1915.399	68.702	1
apkc_sibling_Ecad-mCh	Ecad-mCh	head 15	cell 1	head 15cell 1	12	84.726	518.001	221.818	168.205	1666.283	68.702	1
apkc_sibling_Ecad-mCh	Ecad-mCh	head 15	cell 1	head 15cell 1	13	84.726	514.48	219.39	152.815	1757.424	68.702	1
apkc_sibling_Ecad-mCh	Ecad-mCh	head 15	cell 1	head 15cell 1	14	84.726	512.641	216.903	160.093	1616.492	68.702	1
apkc_sibling_Ecad-mCh	Ecad-mCh	head 15	cell 1	head 15cell 1	15	84.726	493.288	194.438	157.325	1542.883	68.702	1
apkc_sibling_Ecad-mCh	Ecad-mCh	head 15	cell 1	head 15cell 1	16	84.726	462.32	171.551	173.819	1417.223	68.702	1
apkc_sibling_Ecad-mCh	Ecad-mCh	head 15	cell 1	head 15cell 1	17	26.801	528.178	181.602	187.851	1157.218	21.612	1
apkc_sibling_Ecad-mCh	Ecad-mCh	head 15	cell 1	head 15cell 1	18	20.101	500.398	158.027	207.485	1095.841	16.166	1
apkc_sibling_Ecad-mCh	Ecad-mCh	head 15	cell 2	head 15cell 2	1	89.697	227.996	105.93	139.108	1061.852	72.743	1
apkc_sibling_Ecad-mCh	Ecad-mCh	head 15	cell 2	head 15cell 2	2	89.697	248.419	126.444	142.863	1195.486	72.743	1
apkc_sibling_Ecad-mCh	Ecad-mCh	head 15	cell 2	head 15cell 2	3	89.697	263.898	134.426	143.312	1220.322	72.743	1
apkc_sibling_Ecad-mCh	Ecad-mCh	head 15	cell 2	head 15cell 2	4	90.561	296.838	154.922	140.364	1500.99	73.446	1
apkc_sibling_Ecad-mCh	Ecad-mCh	head 15	cell 2	head 15cell 2	5	90.561	328.179	159.819	137.372	1318.055	73.446	1
apkc_sibling_Ecad-mCh	Ecad-mCh	head 15	cell 2	head 15cell 2	6	90.561	346.007	163.619	144.236	1303.818	73.446	1
apkc_sibling_Ecad-mCh	Ecad-mCh	head 15	cell 2	head 15cell 2	7	90.561	362.613	168.272	137.198	1772.015	73.446	1
apkc_sibling_Ecad-mCh	Ecad-mCh	head 15	cell 2	head 15cell 2	8	90.561	378.383	171.689	147.384	1619.884	73.446	1
apkc_sibling_Ecad-mCh	Ecad-mCh	head 15	cell 2	head 15cell 2	9	90.561	385.199	178.208	144.299	1347.745	73.446	1
apkc_sibling_Ecad-mCh	Ecad-mCh	head 15	cell 2	head 15cell 2	10	68.948	387.169	174.344	146.786	1503.713	55.877	1
apkc_sibling_Ecad-mCh	Ecad-mCh	head 15	cell 2	head 15cell 2	11	68.948	395.058	169.721	146.472	1760.346	55.877	1
apkc_sibling_Ecad-mCh	Ecad-mCh	head 15	cell 2	head 15cell 2	12	80.835	434.993	159.658	153.263	1405.594	65.54	1
apkc_sibling_Ecad-mCh	Ecad-mCh	head 15	cell 2	head 15cell 2	13	63.544	432.444	182.405	151.96	1352.718	51.483	1
apkc_sibling_Ecad-mCh	Ecad-mCh	head 15	cell 2	head 15cell 2	14	63.544	437.405	177.81	155.241	1780.673	51.483	1
apkc_sibling_Ecad-mCh	Ecad-mCh	head 15	cell 2	head 15cell 2	15	60.302	439.092	174.855	152.64	1626.006	48.848	1
apkc_sibling_Ecad-mCh	Ecad-mCh	head 15	cell 2	head 15cell 2	16	60.302	444.51	173.522	167.789	1471.39	48.848	1
apkc_sibling_Ecad-mCh	Ecad-mCh	head 15	cell 2	head 15cell 2	17	53.17	430.908	164.661	151.665	1612.545	43.05	1
apkc_sibling_Ecad-mCh	Ecad-mCh	head 16	cell 1	head 16cell 1	1	107.204	229.28	58.907	139.629	534.315	86.974	1
apkc_sibling_Ecad-mCh	Ecad-mCh	head 16	cell 1	head 16cell 1	2	107.204	297.165	114.674	143.842	858.97	86.974	1
apkc_sibling_Ecad-mCh	Ecad-mCh	head 16	cell 1	head 16cell 1	3	107.204	389.281	193.395	145.855	1561.889	86.974	1
apkc_sibling_Ecad-mCh	Ecad-mCh	head 16	cell 1	head 16cell 1	4	107.204	461.834	244.018	147.893	2116.129	86.974	1
apkc_sibling_Ecad-mCh	Ecad-mCh	head 16	cell 1	head 16cell 1	5	107.204	469.567	241.042	147.321	2337.523	86.974	1
apkc_sibling_Ecad-mCh	Ecad-mCh	head 16	cell 1	head 16cell 1	6	107.204	484.628	243.359	149.168	2483.586	86.974	1
apkc_sibling_Ecad-mCh	Ecad-mCh	head 16	cell 1	head 16cell 1	7	107.204	488.798	233.07	146.962	2264.667	86.974	1
apkc_sibling_Ecad-mCh	Ecad-mCh	head 16	cell 1	head 16cell 1	8	110.662	529.301	219.243	150.342	1952.971	89.786	1
apkc_sibling_Ecad-mCh	Ecad-mCh	head 16	cell 1	head 16cell 1	9	110.662	544.61	228.308	152.558	1942.883	89.786	1
apkc_sibling_Ecad-mCh	Ecad-mCh	head 16	cell 1	head 16cell 1	10	110.662	546.928	224.918	161.174	1844.143	89.786	1
apkc_sibling_Ecad-mCh	Ecad-mCh	head 16	cell 1	head 16cell 1	11	110.662	532.116	221.003	150.89	1709.246	89.786	1
apkc_sibling_Ecad-mCh	Ecad-mCh	head 16	cell 1	head 16cell 1	12	87.319	608.423	227.526	171.784	2344.248	70.812	1
apkc_sibling_Ecad-mCh	Ecad-mCh	head 16	cell 1	head 16cell 1	13	24.64	615.599	216.516	160.019	1432.151	19.856	1
apkc_sibling_Ecad-mCh	Ecad-mCh	head 16	cell 2	head 16cell 2	1	104.394	268.687	135.521	132.64	1125.537	84.691	1
apkc_sibling_Ecad-mCh	Ecad-mCh	head 16	cell 2	head 16cell 2	2	104.394	338.286	217.368	141.215	1689.617	84.691	1
apkc_sibling_Ecad-mCh	Ecad-mCh	head 16	cell 2	head 16cell 2	3	104.394	403.518	241.407	143.241	2181.865	84.691	1
apkc_sibling_Ecad-mCh	Ecad-mCh	head 16	cell 2	head 16cell 2	4	99.423	470.894	268.614	148.802	2222.704	80.651	1
apkc_sibling_Ecad-mCh	Ecad-mCh	head 16	cell 2	head 16cell 2	5	99.423	515.096	284.134	148.973	2429.422	80.651	1
apkc_sibling_Ecad-mCh	Ecad-mCh	head 16	cell 2	head 16cell 2	6	99.423	556.829	287.053	147.945	2414.416	80.651	1
apkc_sibling_Ecad-mCh	Ecad-mCh	head 16	cell 2	head 16cell 2	7	99.423	586.214	288.582	152.678	3737.807	80.651	1
apkc_sibling_Ecad-mCh	Ecad-mCh	head 16	cell 2	head 16cell 2	8	100.287	617.082	278.255	140.731	2907.704	81.352	1
apkc_sibling_Ecad-mCh	Ecad-mCh	head 16	cell 2	head 16cell 2	9	100.287	620.839	286.495	158.334	2607.224	81.352	1
apkc_sibling_Ecad-mCh	Ecad-mCh	head 16	cell 2	head 16cell 2	10	100.287	618.58	271.155	145.846	2323.674	81.352	1
apkc_sibling_Ecad-mCh	Ecad-mCh	head 16	cell 2	head 16cell 2	11	103.313	644.868	245.097	192.445	2788.374	83.813	1
apkc_sibling_Ecad-mCh	Ecad-mCh	head 16	cell 2	head 16cell 2	12	74.135	670.124	234.662	203.479	1802.567	60.094	1
apkc_sibling_Ecad-mCh	Ecad-mCh	head 16	cell 2	head 16cell 2	13	67.219	624.791	233.551	190.824	1684.139	54.469	1
apkc_sibling_Ecad-mCh	Ecad-mCh	head 16	cell 2	head 16cell 2	14	67.219	624.791	233.551	190.824	1684.139	54.469	1
apkc_sibling_Ecad-mCh	Ecad-mCh	head 16	cell 2	head 16cell 2	15	33.717	659.237	223.447	213.588	1669.406	27.236	1
apkc_sibling_Ecad-mCh	Ecad-mCh	head 16	cell 3	head 16cell 3	1	103.313	288.571	155.768	139.727	2011.714	83.8	1
apkc_sibling_Ecad-mCh	Ecad-mCh	head 16	cell 3	head 16cell 3	2	103.313	294.702	161.246	133.211	2476.766	83.8	1
apkc_sibling_Ecad-mCh	Ecad-mCh	head 16	cell 3	head 16cell 3	3	103.313	346.104	186.921	146.131	1750.526	83.8	1
apkc_sibling_Ecad-mCh	Ecad-mCh	head 16	cell 3	head 16cell 3	4	103.313	408.149	229.808	144.866	2334.695	83.8	1
apkc_sibling_Ecad-mCh	Ecad-mCh	head 16	cell 3	head 16cell 3	5	103.313	429.642	247.393	141.884	2717.26	83.8	1
apkc_sibling_Ecad-mCh	Ecad-mCh	head 16	cell 3	head 16cell 3	6	103.53	467.261	250.013	146.763	2498.271	83.986	1
apkc_sibling_Ecad-mCh	Ecad-mCh	head 16	cell 3	head 16cell 3	7	103.53	474.831	249.239	149.068	2349.602	83.986	1
apkc_sibling_Ecad-mCh	Ecad-mCh	head 16	cell 3	head 16cell 3	8	103.53	468.542	237.582	145.605	2876.997	83.986	1
apkc_sibling_Ecad-mCh	Ecad-mCh	head 16	cell 3	head 16cell 3	9	103.962	515.282	248.409	152.94	2998.436	84.34	1
apkc_sibling_Ecad-mCh	Ecad-mCh	head 16	cell 3	head 16cell 3	10	103.962	528.311	252.634	148.923	2724.618	84.34	1
apkc_sibling_Ecad-mCh	Ecad-mCh	head 16	cell 3	head 16cell 3	11	76.08	564.648	224.274	166.384	2627.615	61.675	1
apkc_sibling_Ecad-mCh	Ecad-mCh	head 16	cell 3	head 16cell 3	12	46.902	506.525	194.288	168.164	1441.041	37.953	1
apkc_sibling_Ecad-mCh	Ecad-mCh	head 16	cell 3	head 16cell 3	13	42.579	528.497	199.044	171.595	1463.057	34.439	1
apkc_sibling_Ecad-mCh	Ecad-mCh	head 16	cell 3	head 16cell 3	14	28.746	537.98	208.168	181.834	1403.332	23.194	1
apkc_sibling_Ecad-mCh	Ecad-mCh	head 16	cell 3	head 16cell 3	15	26.369	541.671	193.265	190.099	1392.391	21.261	1
apkc_sibling_Ecad-mCh	Ecad-mCh	head 16	cell 3	head 16cell 3	16	20.749	480.164	191.652	175.884	1182.642	16.693	1
apkc_sibling_Ecad-mCh	Ecad-mCh	head 17	cell 1	head 17cell 1	1	87.752	214.839	55.799	144.442	568.883	71.161	1
apkc_sibling_Ecad-mCh	Ecad-mCh	head 17	cell 1	head 17cell 1	2	87.752	247.843	83.672	142.431	762.804	71.161	1
apkc_sibling_Ecad-mCh	Ecad-mCh	head 17	cell 1	head 17cell 1	3	87.752	272.143	105.574	146.335	1073.719	71.161	1
apkc_sibling_Ecad-mCh	Ecad-mCh	head 17	cell 1	head 17cell 1	4	87.752	310.144	134.736	142.234	1324.245	71.161	1
apkc_sibling_Ecad-mCh	Ecad-mCh	head 17	cell 1	head 17cell 1	5	87.752	332.516	142.141	144.304	1214.379	71.161	1
apkc_sibling_Ecad-mCh	Ecad-mCh	head 17	cell 1	head 17cell 1	6	87.752	360.595	157.489	146.926	1208.403	71.161	1
apkc_sibling_Ecad-mCh	Ecad-mCh	head 17	cell 1	head 17cell 1	7	87.103	395.491	163.729	146.469	1444.729	70.634	1
apkc_sibling_Ecad-mCh	Ecad-mCh	head 17	cell 1	head 17cell 1	8	87.103	412.576	177.904	144.634	1304.63	70.634	1
apkc_sibling_Ecad-mCh	Ecad-mCh	head 17	cell 1	head 17cell 1	9	85.59	431.201	189.658	130.714	1386.216	69.404	1
apkc_sibling_Ecad-mCh	Ecad-mCh	head 17	cell 1	head 17cell 1	10	85.59	443.769	196.045	152.35	1393.501	69.404	1
apkc_sibling_Ecad-mCh	Ecad-mCh	head 17	cell 1	head 17cell 1	11	85.59	443.46	184.837	150.893	1590.568	69.404	1
apkc_sibling_Ecad-mCh	Ecad-mCh	head 17	cell 1	head 17cell 1	12	85.59	441.481	179.099	150.064	1355.315	69.404	1
apkc_sibling_Ecad-mCh	Ecad-mCh	head 17	cell 1	head 17cell 1	13	85.59	417.726	159.503	147.112	1613.86	69.404	1
apkc_sibling_Ecad-mCh	Ecad-mCh	head 17	cell 1	head 17cell 1	14	85.374	413.374	145.747	155.297	1235.745	69.23	1
apkc_sibling_Ecad-mCh	Ecad-mCh	head 17	cell 1	head 17cell 1	15	85.374	393.506	137.708	147.791	1018.193	69.23	1
apkc_sibling_Ecad-mCh	Ecad-mCh	head 17	cell 1	head 17cell 1	16	85.374	368.918	127.283	148.923	1222.181	69.23	1
apkc_sibling_Ecad-mCh	Ecad-mCh	head 17	cell 1	head 17cell 1	17	46.037	405.139	137.584	152.771	1043.171	37.25	1
apkc_sibling_Ecad-mCh	Ecad-mCh	head 17	cell 1	head 17cell 1	18	20.533	445.52	160.136	169.664	1392.795	16.516	1
apkc_mutant_Ecad-mCh	Ecad-mCh	head 10	cell 1	head 10cell 1	1	100.72	222.726	61.354	140.034	591.662	81.705	1
apkc_mutant_Ecad-mCh	Ecad-mCh	head 10	cell 1	head 10cell 1	2	100.72	255.713	97.588	139.179	924.496	81.705	1
apkc_mutant_Ecad-mCh	Ecad-mCh	head 10	cell 1	head 10cell 1	3	100.72	282.266	129.329	142.606	1216.718	81.705	1
apkc_mutant_Ecad-mCh	Ecad-mCh	head 10	cell 1	head 10cell 1	4	100.72	341.766	193.453	142.901	1527.072	81.705	1
apkc_mutant_Ecad-mCh	Ecad-mCh	head 10	cell 1	head 10cell 1	5	100.72	380.204	225.124	144.723	1503.999	81.705	1
apkc_mutant_Ecad-mCh	Ecad-mCh	head 10	cell 1	head 10cell 1	6	100.72	407.094	221.004	141.023	1312.351	81.705	1
apkc_mutant_Ecad-mCh	Ecad-mCh	head 10	cell 1	head 10cell 1	7	100.72	382.673	186.068	147.277	1776.487	81.705	1
apkc_mutant_Ecad-mCh	Ecad-mCh	head 10	cell 1	head 10cell 1	8	100.287	403.15	199.13	144.895	1969.357	81.354	1
apkc_mutant_Ecad-mCh	Ecad-mCh	head 10	cell 1	head 10cell 1	9	100.287	432.56	216.562	149.171	1666.283	81.354	1
apkc_mutant_Ecad-mCh	Ecad-mCh	head 10	cell 1	head 10cell 1	10	100.287	445.683	209.657	146.637	1599.61	81.354	1
apkc_mutant_Ecad-mCh	Ecad-mCh	head 10	cell 1	head 10cell 1	11	89.913	447.81	181.375	148.435	1336.721	72.919	1
apkc_mutant_Ecad-mCh	Ecad-mCh	head 10	cell 1	head 10cell 1	12	89.913	430.686	163.93	149.79	1229.495	72.919	1
apkc_mutant_Ecad-mCh	Ecad-mCh	head 10	cell 1	head 10cell 1	13	76.296	391.489	146.157	143.503	1210.2	61.848	1
apkc_mutant_Ecad-mCh	Ecad-mCh	head 10	cell 1	head 10cell 1	14	55.763	369.974	130.129	154.926	941.145	45.157	1
apkc_mutant_Ecad-mCh	Ecad-mCh	head 10	cell 1	head 10cell 1	15	11.239	342.656	104.054	150.637	680.529	8.962	1
apkc_mutant_Ecad-mCh	Ecad-mCh	head 11	cell 1	head 11cell 1	1	79.971	201.677	47.396	134.944	670.88	64.834	1
apkc_mutant_Ecad-mCh	Ecad-mCh	head 11	cell 1	head 11cell 1	2	79.971	245.738	86.18	137.207	755.05	64.834	1
apkc_mutant_Ecad-mCh	Ecad-mCh	head 11	cell 1	head 11cell 1	3	79.971	323.949	172.397	139.913	1310.26	64.834	1
apkc_mutant_Ecad-mCh	Ecad-mCh	head 11	cell 1	head 11cell 1	4	79.971	360.111	193.902	147.49	1592.404	64.834	1
apkc_mutant_Ecad-mCh	Ecad-mCh	head 11	cell 1	head 11cell 1	5	79.971	362.92	172.2	145.047	1569.087	64.834	1
apkc_mutant_Ecad-mCh	Ecad-mCh	head 11	cell 1	head 11cell 1	6	79.322	354.441	157.46	145.528	1703.804	64.309	1
apkc_mutant_Ecad-mCh	Ecad-mCh	head 11	cell 1	head 11cell 1	7	79.322	356.808	156.37	143.959	1515.081	64.309	1
apkc_mutant_Ecad-mCh	Ecad-mCh	head 11	cell 1	head 11cell 1	8	80.187	386.519	177.21	138.416	1305.264	65.013	1
apkc_mutant_Ecad-mCh	Ecad-mCh	head 11	cell 1	head 11cell 1	9	80.187	389.295	189.299	144.228	1672.515	65.013	1
apkc_mutant_Ecad-mCh	Ecad-mCh	head 11	cell 1	head 11cell 1	10	75.432	369.029	135.895	148.412	999.977	61.147	1
apkc_mutant_Ecad-mCh	Ecad-mCh	head 11	cell 1	head 11cell 1	11	61.815	324.818	112.246	144.65	924.22	50.077	1
apkc_mutant_Ecad-mCh	Ecad-mCh	head 11	cell 1	head 11cell 1	12	9.942	365.762	114.22	163.941	783.541	7.907	1
apkc_mutant_Ecad-mCh	Ecad-mCh	head 11	cell 1	head 11cell 1	13	6.916	346.208	82.067	153.632	663.745	5.447	1
apkc_mutant_Ecad-mCh	Ecad-mCh	head 11	cell 2	head 11cell 2	1	71.541	219.543	61.45	141.556	693.108	57.981	1
apkc_mutant_Ecad-mCh	Ecad-mCh	head 11	cell 2	head 11cell 2	2	71.541	278.011	114.445	143.576	1115.846	57.981	1
apkc_mutant_Ecad-mCh	Ecad-mCh	head 11	cell 2	head 11cell 2	3	71.541	383.087	221.634	147.411	1767.3	57.981	1
apkc_mutant_Ecad-mCh	Ecad-mCh	head 11	cell 2	head 11cell 2	4	70.893	431.465	244.025	148.121	2253.18	57.455	1
apkc_mutant_Ecad-mCh	Ecad-mCh	head 11	cell 2	head 11cell 2	5	70.893	429.5	232.033	148.54	2178.974	57.455	1
apkc_mutant_Ecad-mCh	Ecad-mCh	head 11	cell 2	head 11cell 2	6	70.893	433.574	223.778	149.81	2373.86	57.455	1
apkc_mutant_Ecad-mCh	Ecad-mCh	head 11	cell 2	head 11cell 2	7	69.164	434.554	215.231	142.28	2101.129	56.049	1
apkc_mutant_Ecad-mCh	Ecad-mCh	head 11	cell 2	head 11cell 2	8	69.164	469.333	241.085	145.748	2049.525	56.049	1
apkc_mutant_Ecad-mCh	Ecad-mCh	head 11	cell 2	head 11cell 2	9	70.461	482.958	207.999	153.156	1416.268	57.103	1
apkc_mutant_Ecad-mCh	Ecad-mCh	head 11	cell 2	head 11cell 2	10	70.461	410.786	146.378	170.188	1346.263	57.103	1
apkc_mutant_Ecad-mCh	Ecad-mCh	head 11	cell 2	head 11cell 2	11	46.902	408.32	160.754	153.077	1370.623	37.954	1
apkc_mutant_Ecad-mCh	Ecad-mCh	head 11	cell 2	head 11cell 2	12	46.902	398.227	154.177	156.114	1192.226	37.954	1
apkc_mutant_Ecad-mCh	Ecad-mCh	head 11	cell 2	head 11cell 2	13	18.372	408.247	149.334	167.639	1026.868	14.76	1
apkc_mutant_Ecad-mCh	Ecad-mCh	head 11	cell 2	head 11cell 2	14	8.645	448.107	157.695	162.184	873.333	6.853	1
apkc_mutant_Ecad-mCh	Ecad-mCh	head 11	cell 2	head 11cell 2	15	8.429	412.334	153.695	172.966	1184.714	6.677	1
apkc_mutant_Ecad-mCh	Ecad-mCh	head 11	cell 3	head 11cell 3	1	65.273	216.578	60.33	140.713	555.097	52.887	1
apkc_mutant_Ecad-mCh	Ecad-mCh	head 11	cell 3	head 11cell 3	2	65.273	290.293	122.906	139.375	932.911	52.887	1
apkc_mutant_Ecad-mCh	Ecad-mCh	head 11	cell 3	head 11cell 3	3	65.273	382.083	213.388	143.944	1673.078	52.887	1
apkc_mutant_Ecad-mCh	Ecad-mCh	head 11	cell 3	head 11cell 3	4	65.273	480.275	295.479	139.605	2320.995	52.887	1
apkc_mutant_Ecad-mCh	Ecad-mCh	head 11	cell 3	head 11cell 3	5	65.273	502.964	262.965	146.116	2225.477	52.887	1
apkc_mutant_Ecad-mCh	Ecad-mCh	head 11	cell 3	head 11cell 3	6	65.273	499.099	246.185	144.075	1605.494	52.887	1
apkc_mutant_Ecad-mCh	Ecad-mCh	head 11	cell 3	head 11cell 3	7	64.409	513.999	252.228	148.944	2201.687	52.183	1
apkc_mutant_Ecad-mCh	Ecad-mCh	head 11	cell 3	head 11cell 3	8	64.409	507.614	248.334	158.881	2282.934	52.183	1
apkc_mutant_Ecad-mCh	Ecad-mCh	head 11	cell 3	head 11cell 3	9	65.706	549.669	247.417	168.063	1961.656	53.237	1
apkc_mutant_Ecad-mCh	Ecad-mCh	head 11	cell 3	head 11cell 3	10	67.002	498.794	198.738	154.985	1533.953	54.292	1
apkc_mutant_Ecad-mCh	Ecad-mCh	head 11	cell 3	head 11cell 3	11	67.002	468.969	178.952	151.27	1470.05	54.292	1
apkc_mutant_Ecad-mCh	Ecad-mCh	head 11	cell 3	head 11cell 3	12	56.412	478.647	193.869	157.358	1551.932	45.684	1
apkc_mutant_Ecad-mCh	Ecad-mCh	head 11	cell 3	head 11cell 3	13	56.412	460.607	188.09	153.203	1516.354	45.684	1
apkc_mutant_Ecad-mCh	Ecad-mCh	head 11	cell 3	head 11cell 3	14	46.686	424.346	147.081	163.752	1099.106	37.778	1
apkc_mutant_Ecad-mCh	Ecad-mCh	head 11	cell 4	head 11cell 4	1	94.452	263.24	104.452	137.178	847.226	76.605	1
apkc_mutant_Ecad-mCh	Ecad-mCh	head 11	cell 4	head 11cell 4	2	94.452	307.604	155.073	143.903	1334.05	76.605	1
apkc_mutant_Ecad-mCh	Ecad-mCh	head 11	cell 4	head 11cell 4	3	94.452	395.954	228.575	146.945	1892.417	76.605	1
apkc_mutant_Ecad-mCh	Ecad-mCh	head 11	cell 4	head 11cell 4	4	94.452	419.207	200.008	148.182	1852.825	76.605	1
apkc_mutant_Ecad-mCh	Ecad-mCh	head 11	cell 4	head 11cell 4	5	94.452	416.244	187.279	146.181	2181.263	76.605	1
apkc_mutant_Ecad-mCh	Ecad-mCh	head 11	cell 4	head 11cell 4	6	92.074	436.581	186.827	148.737	1635.061	74.676	1
apkc_mutant_Ecad-mCh	Ecad-mCh	head 11	cell 4	head 11cell 4	7	92.074	437.98	191.919	149.315	1625.328	74.676	1
apkc_mutant_Ecad-mCh	Ecad-mCh	head 11	cell 4	head 11cell 4	8	90.994	468.337	209.691	145.637	2040.984	73.797	1
apkc_mutant_Ecad-mCh	Ecad-mCh	head 11	cell 4	head 11cell 4	9	90.994	428.194	205.046	146.675	1935.549	73.797	1
apkc_mutant_Ecad-mCh	Ecad-mCh	head 11	cell 4	head 11cell 4	10	52.954	473.833	171.537	177.494	1294.982	42.873	1
apkc_mutant_Ecad-mCh	Ecad-mCh	head 11	cell 4	head 11cell 4	11	27.017	433.505	149.381	169.802	1173.331	21.787	1
apkc_mutant_Ecad-mCh	Ecad-mCh	head 11	cell 5	head 11cell 5	1	110.446	229.024	74.968	143.715	746.155	89.61	1
apkc_mutant_Ecad-mCh	Ecad-mCh	head 11	cell 5	head 11cell 5	2	110.446	274.149	121.512	140.303	1057.414	89.61	1
apkc_mutant_Ecad-mCh	Ecad-mCh	head 11	cell 5	head 11cell 5	3	110.446	348.071	177.832	133.992	1217.35	89.61	1
apkc_mutant_Ecad-mCh	Ecad-mCh	head 11	cell 5	head 11cell 5	4	110.446	403.292	197.299	143.896	2014.6	89.61	1
apkc_mutant_Ecad-mCh	Ecad-mCh	head 11	cell 5	head 11cell 5	5	110.446	412.593	192.148	146.393	2220.197	89.61	1
apkc_mutant_Ecad-mCh	Ecad-mCh	head 11	cell 5	head 11cell 5	6	108.717	420.117	185.573	145.279	2022.142	88.205	1
apkc_mutant_Ecad-mCh	Ecad-mCh	head 11	cell 5	head 11cell 5	7	108.717	430.351	197.562	146.867	2774.027	88.205	1
apkc_mutant_Ecad-mCh	Ecad-mCh	head 11	cell 5	head 11cell 5	8	108.717	447.802	203.63	149.159	2374.183	88.205	1
apkc_mutant_Ecad-mCh	Ecad-mCh	head 11	cell 5	head 11cell 5	9	105.042	490.936	234.161	145.05	1637.828	85.217	1
apkc_mutant_Ecad-mCh	Ecad-mCh	head 11	cell 5	head 11cell 5	10	105.042	400.394	179.868	149.415	1564.886	85.217	1
apkc_mutant_Ecad-mCh	Ecad-mCh	head 11	cell 5	head 11cell 5	11	13.184	480.223	174.553	162.624	1258.274	10.54	1
apkc_mutant_Ecad-mCh	Ecad-mCh	head 11	cell 6	head 11cell 6	1	91.858	217.425	57.749	140.249	498.483	74.498	1
apkc_mutant_Ecad-mCh	Ecad-mCh	head 11	cell 6	head 11cell 6	2	91.858	301.987	151.533	143.716	1553.272	74.498	1
apkc_mutant_Ecad-mCh	Ecad-mCh	head 11	cell 6	head 11cell 6	3	92.723	387.303	239.583	136.348	2114.456	75.2	1
apkc_mutant_Ecad-mCh	Ecad-mCh	head 11	cell 6	head 11cell 6	4	92.723	441.298	265.469	136.848	3003.561	75.2	1
apkc_mutant_Ecad-mCh	Ecad-mCh	head 11	cell 6	head 11cell 6	5	92.723	435.694	222.903	141.708	2292.267	75.2	1
apkc_mutant_Ecad-mCh	Ecad-mCh	head 11	cell 6	head 11cell 6	6	92.723	443.515	219.183	148.164	2197.727	75.2	1
apkc_mutant_Ecad-mCh	Ecad-mCh	head 11	cell 6	head 11cell 6	7	92.723	449.283	227.971	148.153	2270.742	75.2	1
apkc_mutant_Ecad-mCh	Ecad-mCh	head 11	cell 6	head 11cell 6	8	94.02	498.129	253.323	148.385	1976.901	76.257	1
apkc_mutant_Ecad-mCh	Ecad-mCh	head 11	cell 6	head 11cell 6	9	94.02	490.072	246.92	147.227	2425.365	76.257	1
apkc_mutant_Ecad-mCh	Ecad-mCh	head 11	cell 6	head 11cell 6	10	94.884	475.331	231.655	148.939	1975.479	76.96	1
apkc_mutant_Ecad-mCh	Ecad-mCh	head 11	cell 6	head 11cell 6	11	94.884	439.989	206.827	146.264	1702.094	76.96	1
apkc_mutant_Ecad-mCh	Ecad-mCh	head 11	cell 6	head 11cell 6	12	94.884	413.891	185.628	140.282	1241.033	76.96	1
apkc_mutant_Ecad-mCh	Ecad-mCh	head 11	cell 6	head 11cell 6	13	64.193	491.669	186.841	149.362	1535.511	52.008	1
apkc_mutant_Ecad-mCh	Ecad-mCh	head 11	cell 6	head 11cell 6	14	64.193	443.629	161.2	153.346	1328.736	52.008	1
apkc_mutant_Ecad-mCh	Ecad-mCh	head 11	cell 6	head 11cell 6	15	56.844	405.573	146.732	155.311	1215.186	46.036	1
apkc_mutant_Ecad-mCh	Ecad-mCh	head 11	cell 6	head 11cell 6	16	26.369	400.252	142.983	147.794	985.066	21.261	1
apkc_mutant_Ecad-mCh	Ecad-mCh	head 11	cell 6	head 11cell 6	17	16.859	380.191	122.063	150.156	1070.822	13.53	1
apkc_mutant_Ecad-mCh	Ecad-mCh	head 11	cell 7	head 11cell 7	1	89.697	204.929	51.595	139.85	557.183	72.744	1
apkc_mutant_Ecad-mCh	Ecad-mCh	head 11	cell 7	head 11cell 7	2	89.697	214.989	64.942	138.54	754.212	72.744	1
apkc_mutant_Ecad-mCh	Ecad-mCh	head 11	cell 7	head 11cell 7	3	89.697	223.281	73.986	137.061	745.99	72.744	1
apkc_mutant_Ecad-mCh	Ecad-mCh	head 11	cell 7	head 11cell 7	4	90.561	271.291	117.47	133.073	1078.34	73.447	1
apkc_mutant_Ecad-mCh	Ecad-mCh	head 11	cell 7	head 11cell 7	5	90.561	316.581	158.24	143.672	1347.084	73.447	1
apkc_mutant_Ecad-mCh	Ecad-mCh	head 11	cell 7	head 11cell 7	6	91.426	359.816	175.529	142.553	2039.836	74.147	1
apkc_mutant_Ecad-mCh	Ecad-mCh	head 11	cell 7	head 11cell 7	7	91.426	363.764	160.21	146.594	1945.811	74.147	1
apkc_mutant_Ecad-mCh	Ecad-mCh	head 11	cell 7	head 11cell 7	8	92.29	408.376	182.148	143.283	2365.299	74.853	1
apkc_mutant_Ecad-mCh	Ecad-mCh	head 11	cell 7	head 11cell 7	9	92.29	418.731	173.689	144.048	1582.688	74.853	1
apkc_mutant_Ecad-mCh	Ecad-mCh	head 11	cell 7	head 11cell 7	10	95.965	406.945	178.358	142.192	1296.361	77.839	1
apkc_mutant_Ecad-mCh	Ecad-mCh	head 11	cell 7	head 11cell 7	11	95.965	408.241	180.21	149.714	1303.165	77.839	1
apkc_mutant_Ecad-mCh	Ecad-mCh	head 11	cell 7	head 11cell 7	12	95.965	391.102	169.853	149.119	1367.682	77.839	1
apkc_mutant_Ecad-mCh	Ecad-mCh	head 11	cell 7	head 11cell 7	13	68.299	410.092	158.649	148.643	1338.503	55.349	1
apkc_mutant_Ecad-mCh	Ecad-mCh	head 11	cell 7	head 11cell 7	14	68.299	400.211	157.389	148.018	1337.425	55.349	1
apkc_mutant_Ecad-mCh	Ecad-mCh	head 11	cell 7	head 11cell 7	15	54.25	397.824	157.101	151.011	1275.396	43.925	1
apkc_mutant_Ecad-mCh	Ecad-mCh	head 11	cell 7	head 11cell 7	16	54.25	366.497	149.977	135.597	1164.42	43.925	1
apkc_mutant_Ecad-mCh	Ecad-mCh	head 11	cell 7	head 11cell 7	17	13.617	468.102	170.333	201.965	1208.547	10.894	1
apkc_mutant_Ecad-mCh	Ecad-mCh	head 11	cell 7	head 11cell 7	18	9.726	439.186	135.685	184.014	959.101	7.732	1
apkc_mutant_Ecad-mCh	Ecad-mCh	head 11	cell 7	head 11cell 7	19	10.591	409.922	113.128	179.289	803.722	8.434	1
apkc_mutant_Ecad-mCh	Ecad-mCh	head 12	cell 1	head 12cell 1	1	125.143	208.035	71.597	136.623	799.892	101.561	1
apkc_mutant_Ecad-mCh	Ecad-mCh	head 12	cell 1	head 12cell 1	2	125.143	235.008	108.589	141.57	975.182	101.561	1
apkc_mutant_Ecad-mCh	Ecad-mCh	head 12	cell 1	head 12cell 1	3	125.143	239.681	111.831	140.097	1042.688	101.561	1
apkc_mutant_Ecad-mCh	Ecad-mCh	head 12	cell 1	head 12cell 1	4	125.143	273.248	138.596	136.312	1544.953	101.561	1
apkc_mutant_Ecad-mCh	Ecad-mCh	head 12	cell 1	head 12cell 1	5	125.143	341.297	164.605	140.657	1723.543	101.561	1
apkc_mutant_Ecad-mCh	Ecad-mCh	head 12	cell 1	head 12cell 1	6	125.792	374.206	170.026	140.011	1515.829	102.088	1
apkc_mutant_Ecad-mCh	Ecad-mCh	head 12	cell 1	head 12cell 1	7	125.792	400.948	177.247	144.243	1599.459	102.088	1
apkc_mutant_Ecad-mCh	Ecad-mCh	head 12	cell 1	head 12cell 1	8	125.792	413.199	179.491	144.162	1569.937	102.088	1
apkc_mutant_Ecad-mCh	Ecad-mCh	head 12	cell 1	head 12cell 1	9	125.359	441.593	179.201	148.23	2064.19	101.736	1
apkc_mutant_Ecad-mCh	Ecad-mCh	head 12	cell 1	head 12cell 1	10	125.359	447.396	172.919	150.807	1642.642	101.736	1
apkc_mutant_Ecad-mCh	Ecad-mCh	head 12	cell 1	head 12cell 1	11	125.359	428.923	162.651	144.197	1675.839	101.736	1
apkc_mutant_Ecad-mCh	Ecad-mCh	head 12	cell 1	head 12cell 1	12	69.596	383.343	140.629	149.524	1389.447	56.403	1
apkc_mutant_Ecad-mCh	Ecad-mCh	head 12	cell 1	head 12cell 1	13	22.478	349.983	149.322	151.685	984.132	18.098	1
apkc_mutant_Ecad-mCh	Ecad-mCh	head 12	cell 1	head 12cell 1	14	12.752	426.498	145.751	159.784	960.268	10.189	1
apkc_mutant_Ecad-mCh	Ecad-mCh	head 12	cell 1	head 12cell 1	15	6.916	415.804	152.695	162.094	987.39	5.447	1
apkc_mutant_Ecad-mCh	Ecad-mCh	head 13	cell 1	head 13cell 1	1	83.861	193.361	41.631	139.907	566.074	67.993	1
apkc_mutant_Ecad-mCh	Ecad-mCh	head 13	cell 1	head 13cell 1	2	83.861	226.743	67.652	139.304	608.156	67.993	1
apkc_mutant_Ecad-mCh	Ecad-mCh	head 13	cell 1	head 13cell 1	3	83.861	271.314	99.72	141.447	1010.486	67.993	1
apkc_mutant_Ecad-mCh	Ecad-mCh	head 13	cell 1	head 13cell 1	4	83.861	276.799	98.509	146.874	1087.79	67.993	1
apkc_mutant_Ecad-mCh	Ecad-mCh	head 13	cell 1	head 13cell 1	5	83.861	278.017	94.194	144.646	1143.902	67.993	1
apkc_mutant_Ecad-mCh	Ecad-mCh	head 13	cell 1	head 13cell 1	6	84.726	288.799	95.894	148.8	1127.295	68.701	1
apkc_mutant_Ecad-mCh	Ecad-mCh	head 13	cell 1	head 13cell 1	7	84.726	307.14	100.057	147.765	839.324	68.701	1
apkc_mutant_Ecad-mCh	Ecad-mCh	head 13	cell 1	head 13cell 1	8	84.293	341.226	113.082	141.665	940.404	68.349	1
apkc_mutant_Ecad-mCh	Ecad-mCh	head 13	cell 1	head 13cell 1	9	84.293	349.16	123.08	147.245	876.809	68.349	1
apkc_mutant_Ecad-mCh	Ecad-mCh	head 13	cell 2	head 13cell 2	1	84.726	200.911	46.957	136.943	525	68.702	1
apkc_mutant_Ecad-mCh	Ecad-mCh	head 13	cell 2	head 13cell 2	2	84.726	234.444	72.658	139.017	943.51	68.702	1
apkc_mutant_Ecad-mCh	Ecad-mCh	head 13	cell 2	head 13cell 2	3	84.726	258.203	80.146	139.802	789.564	68.702	1
apkc_mutant_Ecad-mCh	Ecad-mCh	head 13	cell 2	head 13cell 2	4	84.726	263.955	88.522	144.452	1222.209	68.702	1
apkc_mutant_Ecad-mCh	Ecad-mCh	head 13	cell 2	head 13cell 2	5	83.645	279.503	85.52	142.653	807.022	67.824	1
apkc_mutant_Ecad-mCh	Ecad-mCh	head 13	cell 2	head 13cell 2	6	83.645	301.593	95.117	146.892	900.302	67.824	1
apkc_mutant_Ecad-mCh	Ecad-mCh	head 13	cell 2	head 13cell 2	7	85.158	332.812	107.186	150.223	977.926	69.053	1
apkc_mutant_Ecad-mCh	Ecad-mCh	head 13	cell 2	head 13cell 2	8	85.158	333.908	104.675	147.451	1049.363	69.053	1
apkc_mutant_Ecad-mCh	Ecad-mCh	head 13	cell 3	head 13cell 3	1	65.922	193.175	41.705	139.81	409.258	53.412	1
apkc_mutant_Ecad-mCh	Ecad-mCh	head 13	cell 3	head 13cell 3	2	65.922	220.083	65.586	141.498	768.575	53.412	1
apkc_mutant_Ecad-mCh	Ecad-mCh	head 13	cell 3	head 13cell 3	3	65.922	254.4	82.028	143.816	991.224	53.412	1
apkc_mutant_Ecad-mCh	Ecad-mCh	head 13	cell 3	head 13cell 3	4	65.922	256.433	86.369	142.62	934.469	53.412	1
apkc_mutant_Ecad-mCh	Ecad-mCh	head 13	cell 3	head 13cell 3	5	63.976	266.388	84.07	142.88	880.63	51.83	1
apkc_mutant_Ecad-mCh	Ecad-mCh	head 13	cell 3	head 13cell 3	6	63.976	272.823	84.61	145.764	907.25	51.83	1
apkc_mutant_Ecad-mCh	Ecad-mCh	head 13	cell 3	head 13cell 3	7	64.193	282.17	82.282	145.117	873.193	52.003	1
apkc_mutant_Ecad-mCh	Ecad-mCh	head 13	cell 3	head 13cell 3	8	64.193	287.834	86.048	147.177	785.04	52.003	1
apkc_mutant_Ecad-mCh	Ecad-mCh	head 13	cell 3	head 13cell 3	9	66.138	278.08	82.256	146.392	841.583	53.59	1
apkc_mutant_Ecad-mCh	Ecad-mCh	head 13	cell 3	head 13cell 3	10	39.121	261.643	74.731	149.858	742.022	31.626	1
apkc_mutant_Ecad-mCh	Ecad-mCh	head 13	cell 3	head 13cell 3	11	30.259	292.352	82.178	146.103	720.449	24.423	1
apkc_mutant_Ecad-mCh	Ecad-mCh	head 13	cell 3	head 13cell 3	12	23.991	295.881	77.269	150.135	618.769	19.328	1
apkc_mutant_Ecad-mCh	Ecad-mCh	head 13	cell 4	head 13cell 4	1	73.919	179.674	38.066	139.166	432.907	59.916	1
apkc_mutant_Ecad-mCh	Ecad-mCh	head 13	cell 4	head 13cell 4	2	73.919	200.257	61.434	143.906	677.824	59.916	1
apkc_mutant_Ecad-mCh	Ecad-mCh	head 13	cell 4	head 13cell 4	3	73.919	228.936	83.56	139.386	826.622	59.916	1
apkc_mutant_Ecad-mCh	Ecad-mCh	head 13	cell 4	head 13cell 4	4	73.919	238.498	84.593	145.488	835.023	59.916	1
apkc_mutant_Ecad-mCh	Ecad-mCh	head 13	cell 4	head 13cell 4	5	72.19	250.171	86.542	143.663	782.168	58.51	1
apkc_mutant_Ecad-mCh	Ecad-mCh	head 13	cell 4	head 13cell 4	6	70.461	264.435	95.928	147.171	916.518	57.105	1
apkc_mutant_Ecad-mCh	Ecad-mCh	head 13	cell 4	head 13cell 4	7	70.461	273.412	93.485	146.996	906.65	57.105	1
apkc_mutant_Ecad-mCh	Ecad-mCh	head 13	cell 4	head 13cell 4	8	50.144	285.518	98.698	144.512	810.177	40.589	1
apkc_mutant_Ecad-mCh	Ecad-mCh	head 13	cell 4	head 13cell 4	9	50.144	284.29	90.323	142.103	889.328	40.589	1
apkc_mutant_Ecad-mCh	Ecad-mCh	head 13	cell 4	head 13cell 4	10	37.176	300.191	101.935	149.946	883.503	30.045	1
apkc_mutant_Ecad-mCh	Ecad-mCh	head 13	cell 4	head 13cell 4	11	25.288	318.68	95.393	153.579	900.152	20.382	1
apkc_mutant_Ecad-mCh	Ecad-mCh	head 13	cell 4	head 13cell 4	12	19.236	300.89	83.477	149.071	684.718	15.462	1
apkc_mutant_Ecad-mCh	Ecad-mCh	head 14	cell 1	head 14cell 1	1	79.106	181.968	32.96	140.545	366.497	64.132	1
apkc_mutant_Ecad-mCh	Ecad-mCh	head 14	cell 1	head 14cell 1	2	79.106	211.42	61.725	144.049	680.191	64.132	1
apkc_mutant_Ecad-mCh	Ecad-mCh	head 14	cell 1	head 14cell 1	3	79.106	233.124	84.208	139.473	783.492	64.132	1
apkc_mutant_Ecad-mCh	Ecad-mCh	head 14	cell 1	head 14cell 1	4	79.106	290.56	131.832	135.846	1081.252	64.132	1
apkc_mutant_Ecad-mCh	Ecad-mCh	head 14	cell 1	head 14cell 1	5	79.106	298.159	120.245	145.75	1251.361	64.132	1
apkc_mutant_Ecad-mCh	Ecad-mCh	head 14	cell 1	head 14cell 1	6	82.78	300.413	103.335	134.238	907.569	67.12	1
apkc_mutant_Ecad-mCh	Ecad-mCh	head 14	cell 1	head 14cell 1	7	83.645	312.184	114.497	147.729	1041.989	67.824	1
apkc_mutant_Ecad-mCh	Ecad-mCh	head 14	cell 1	head 14cell 1	8	84.509	346.494	151.674	143.617	1760.119	68.527	1
apkc_mutant_Ecad-mCh	Ecad-mCh	head 14	cell 1	head 14cell 1	9	85.374	349.713	160.009	147.289	2073.586	69.231	1
apkc_mutant_Ecad-mCh	Ecad-mCh	head 14	cell 1	head 14cell 1	10	60.518	342.336	167.079	149.353	2119.717	49.024	1
apkc_mutant_Ecad-mCh	Ecad-mCh	head 14	cell 2	head 14cell 2	1	43.227	200.283	58.271	142.163	549.199	34.966	1
apkc_mutant_Ecad-mCh	Ecad-mCh	head 14	cell 2	head 14cell 2	2	53.386	238.386	98.195	142.218	924.102	43.22	1
apkc_mutant_Ecad-mCh	Ecad-mCh	head 14	cell 2	head 14cell 2	3	53.386	260.641	120.713	145.861	1098.329	43.22	1
apkc_mutant_Ecad-mCh	Ecad-mCh	head 14	cell 2	head 14cell 2	4	88.832	250.406	106.591	141.834	878.935	72.038	1
apkc_mutant_Ecad-mCh	Ecad-mCh	head 14	cell 2	head 14cell 2	5	88.832	273.711	114.138	143.531	1330.961	72.038	1
apkc_mutant_Ecad-mCh	Ecad-mCh	head 14	cell 2	head 14cell 2	6	88.832	301.856	123.648	147.349	1142.808	72.038	1
apkc_mutant_Ecad-mCh	Ecad-mCh	head 14	cell 2	head 14cell 2	7	90.561	321.864	135.937	142.392	1054.396	73.442	1
apkc_mutant_Ecad-mCh	Ecad-mCh	head 14	cell 2	head 14cell 2	8	90.561	320.026	130.996	146.505	1309.35	73.442	1
apkc_mutant_Ecad-mCh	Ecad-mCh	head 14	cell 2	head 14cell 2	9	62.247	342.361	148.129	147.075	1195.592	50.427	1
apkc_mutant_Ecad-mCh	Ecad-mCh	head 14	cell 2	head 14cell 2	10	62.247	362.132	149.033	148.197	1172.89	50.427	1
apkc_mutant_Ecad-mCh	Ecad-mCh	head 14	cell 2	head 14cell 2	11	48.847	383.411	149.756	146.85	1262	39.532	1
apkc_mutant_Ecad-mCh	Ecad-mCh	head 14	cell 2	head 14cell 2	12	36.527	375.654	149.316	147.687	1082.32	29.517	1
apkc_mutant_Ecad-mCh	Ecad-mCh	head 15	cell 1	head 15cell 1	1	129.466	195.967	44.949	140.378	486.807	105.072	1
apkc_mutant_Ecad-mCh	Ecad-mCh	head 15	cell 1	head 15cell 1	2	129.466	239.05	83.816	133.798	767.159	105.072	1
apkc_mutant_Ecad-mCh	Ecad-mCh	head 15	cell 1	head 15cell 1	3	129.466	295.739	157.398	142.15	1345.476	105.072	1
apkc_mutant_Ecad-mCh	Ecad-mCh	head 15	cell 1	head 15cell 1	4	129.466	378.647	247.663	143.458	1651.872	105.072	1
apkc_mutant_Ecad-mCh	Ecad-mCh	head 15	cell 1	head 15cell 1	5	129.898	467.981	281.62	137.738	2750.748	105.426	1
apkc_mutant_Ecad-mCh	Ecad-mCh	head 15	cell 1	head 15cell 1	6	129.898	508.767	272.213	148.352	2703.73	105.426	1
apkc_mutant_Ecad-mCh	Ecad-mCh	head 15	cell 1	head 15cell 1	7	130.547	545.513	271.225	141.696	2797.978	105.953	1
apkc_mutant_Ecad-mCh	Ecad-mCh	head 15	cell 1	head 15cell 1	8	131.627	582.042	261.706	149.462	2220.479	106.832	1
apkc_mutant_Ecad-mCh	Ecad-mCh	head 15	cell 1	head 15cell 1	9	131.627	609.332	277.67	152.307	2448.408	106.832	1
apkc_mutant_Ecad-mCh	Ecad-mCh	head 15	cell 1	head 15cell 1	10	131.627	611.74	295.248	145.1	2929.356	106.832	1
apkc_mutant_Ecad-mCh	Ecad-mCh	head 15	cell 1	head 15cell 1	11	131.411	665.376	300.153	158.787	3234.851	106.656	1
apkc_mutant_Ecad-mCh	Ecad-mCh	head 15	cell 1	head 15cell 1	12	131.411	680.69	300.038	165.514	3764.404	106.656	1
apkc_mutant_Ecad-mCh	Ecad-mCh	head 15	cell 1	head 15cell 1	13	129.466	644.713	263.54	172.438	3679.972	105.071	1
apkc_mutant_Ecad-mCh	Ecad-mCh	head 15	cell 1	head 15cell 1	14	132.06	571.986	213.303	162.296	1806.481	107.181	1
apkc_mutant_Ecad-mCh	Ecad-mCh	head 15	cell 1	head 15cell 1	15	123.63	553.501	239.414	162.316	1847.396	100.328	1
apkc_mutant_Ecad-mCh	Ecad-mCh	head 15	cell 1	head 15cell 1	16	36.743	570.985	181.598	200.553	1435.559	29.696	1
apkc_mutant_Ecad-mCh	Ecad-mCh	head 15	cell 1	head 15cell 1	17	31.124	529.559	160.949	190.195	1357.79	25.127	1
apkc_mutant_Ecad-mCh	Ecad-mCh	head 15	cell 1	head 15cell 1	18	29.178	511.952	152.625	206.731	1264.653	23.545	1
apkc_mutant_Ecad-mCh	Ecad-mCh	head 16	cell 1	head 16cell 1	1	70.461	211.206	54.148	136.942	563.098	57.105	1
apkc_mutant_Ecad-mCh	Ecad-mCh	head 16	cell 1	head 16cell 1	2	70.028	244.331	77.161	140.532	636.404	56.753	1
apkc_mutant_Ecad-mCh	Ecad-mCh	head 16	cell 1	head 16cell 1	3	69.164	307.473	125.202	143.171	1057.276	56.047	1
apkc_mutant_Ecad-mCh	Ecad-mCh	head 16	cell 1	head 16cell 1	4	69.164	362.272	157.414	148.62	1542.214	56.047	1
apkc_mutant_Ecad-mCh	Ecad-mCh	head 16	cell 1	head 16cell 1	5	69.164	377.754	147.28	148.67	1122.402	56.05	1
apkc_mutant_Ecad-mCh	Ecad-mCh	head 16	cell 1	head 16cell 1	6	68.732	464.621	250.092	158.712	3920.177	55.699	1
apkc_mutant_Ecad-mCh	Ecad-mCh	head 16	cell 1	head 16cell 1	7	68.732	494.857	323.33	154.543	4095	55.699	1
apkc_mutant_Ecad-mCh	Ecad-mCh	head 16	cell 1	head 16cell 1	8	69.596	489.055	198.39	161.67	1698.346	56.402	1
apkc_mutant_Ecad-mCh	Ecad-mCh	head 16	cell 1	head 16cell 1	9	69.596	517.37	213.544	155.318	2009.723	56.402	1
apkc_mutant_Ecad-mCh	Ecad-mCh	head 16	cell 1	head 16cell 1	10	68.083	573.464	247.559	162.717	2987.44	55.173	1
apkc_mutant_Ecad-mCh	Ecad-mCh	head 16	cell 1	head 16cell 1	11	68.083	601.052	298.868	190.511	3408.902	55.173	1
apkc_mutant_Ecad-mCh	Ecad-mCh	head 16	cell 1	head 16cell 1	12	67.002	586.255	283.573	195.737	3553.88	54.293	1
apkc_mutant_Ecad-mCh	Ecad-mCh	head 16	cell 1	head 16cell 1	13	65.922	571.765	273.501	153.08	2751.249	53.414	1
apkc_mutant_Ecad-mCh	Ecad-mCh	head 16	cell 1	head 16cell 1	14	46.037	588.196	265.41	202.99	3347.12	37.249	1
apkc_mutant_Ecad-mCh	Ecad-mCh	head 16	cell 1	head 16cell 1	15	42.579	561.612	284.088	201.887	3511.553	34.439	1
apkc_mutant_Ecad-mCh	Ecad-mCh	head 16	cell 1	head 16cell 1	16	30.691	632.262	365.678	194.048	3689.662	24.774	1
apkc_mutant_Ecad-mCh	Ecad-mCh	head 16	cell 1	head 16cell 1	17	30.908	596.935	280.362	199.738	3203.564	24.951	1
apkc_mutant_Ecad-mCh	Ecad-mCh	head 16	cell 1	head 16cell 1	18	22.046	678.364	307.949	246.818	2906.166	17.747	1
apkc_mutant_Ecad-mCh	Ecad-mCh	head 16	cell 2	head 16cell 2	1	65.922	206.479	49.089	137.43	583.932	53.415	1
apkc_mutant_Ecad-mCh	Ecad-mCh	head 16	cell 2	head 16cell 2	2	65.922	248.463	79.256	146.238	724.833	53.415	1
apkc_mutant_Ecad-mCh	Ecad-mCh	head 16	cell 2	head 16cell 2	3	65.922	294.316	113.634	148.571	1023.678	53.415	1
apkc_mutant_Ecad-mCh	Ecad-mCh	head 16	cell 2	head 16cell 2	4	65.922	328.706	132.626	146.03	1193.289	53.415	1
apkc_mutant_Ecad-mCh	Ecad-mCh	head 16	cell 2	head 16cell 2	5	65.922	430.66	169.876	148.018	1266.026	53.414	1
apkc_mutant_Ecad-mCh	Ecad-mCh	head 16	cell 2	head 16cell 2	6	65.922	459.68	184.301	149.646	1446.938	53.414	1
apkc_mutant_Ecad-mCh	Ecad-mCh	head 16	cell 2	head 16cell 2	7	65.922	490.001	195.744	163.875	1921.239	53.414	1
apkc_mutant_Ecad-mCh	Ecad-mCh	head 16	cell 2	head 16cell 2	8	65.922	515.708	206.503	164.497	1917.211	53.414	1
apkc_mutant_Ecad-mCh	Ecad-mCh	head 16	cell 2	head 16cell 2	9	65.706	597.377	323.83	145.453	3840.924	53.24	1
apkc_mutant_Ecad-mCh	Ecad-mCh	head 16	cell 2	head 16cell 2	10	65.706	627.132	325.778	176.565	3995.241	53.24	1
apkc_mutant_Ecad-mCh	Ecad-mCh	head 16	cell 2	head 16cell 2	11	65.706	585.338	243.276	176.514	2751.526	53.24	1
apkc_mutant_Ecad-mCh	Ecad-mCh	head 16	cell 2	head 16cell 2	12	65.706	575.333	226.894	209.893	2195.824	53.24	1
apkc_mutant_Ecad-mCh	Ecad-mCh	head 16	cell 2	head 16cell 2	13	67.651	573.584	214.525	211.607	2432.146	54.821	1
apkc_mutant_Ecad-mCh	Ecad-mCh	head 16	cell 2	head 16cell 2	14	67.651	565.735	238.203	183.015	3199.475	54.821	1
apkc_mutant_Ecad-mCh	Ecad-mCh	head 16	cell 2	head 16cell 2	15	68.515	560.06	223.168	192.853	2190.615	55.524	1
apkc_mutant_Ecad-mCh	Ecad-mCh	head 16	cell 2	head 16cell 2	16	68.515	551.132	208.571	144.189	2468.133	55.524	1
apkc_mutant_Ecad-mCh	Ecad-mCh	head 16	cell 2	head 16cell 2	17	58.357	533.909	175.763	151.019	1731.637	47.265	1
apkc_mutant_Ecad-mCh	Ecad-mCh	head 16	cell 2	head 16cell 2	18	21.83	505.42	194.958	184.767	2745.711	17.57	1
apkc_mutant_Ecad-mCh	Ecad-mCh	head 16	cell 3	head 16cell 3	1	74.351	228.782	64.766	143.058	544.847	60.265	1
apkc_mutant_Ecad-mCh	Ecad-mCh	head 16	cell 3	head 16cell 3	2	74.351	273.211	109.71	142.672	832.454	60.265	1
apkc_mutant_Ecad-mCh	Ecad-mCh	head 16	cell 3	head 16cell 3	3	76.296	303.143	129.708	147.45	1569.639	61.849	1
apkc_mutant_Ecad-mCh	Ecad-mCh	head 16	cell 3	head 16cell 3	4	76.296	395.376	183.177	140.013	1348.492	61.849	1
apkc_mutant_Ecad-mCh	Ecad-mCh	head 16	cell 3	head 16cell 3	5	76.296	409.364	186.687	148.303	1747.081	61.849	1
apkc_mutant_Ecad-mCh	Ecad-mCh	head 16	cell 3	head 16cell 3	6	77.377	449.554	195.592	150.125	2090.713	62.722	1
apkc_mutant_Ecad-mCh	Ecad-mCh	head 16	cell 3	head 16cell 3	7	77.377	485.219	194.136	155.613	1728.414	62.722	1
apkc_mutant_Ecad-mCh	Ecad-mCh	head 16	cell 3	head 16cell 3	8	77.377	534.998	207.3	152.768	1649.345	62.722	1
apkc_mutant_Ecad-mCh	Ecad-mCh	head 16	cell 3	head 16cell 3	9	77.377	599.632	248.834	155.305	2523.932	62.722	1
apkc_mutant_Ecad-mCh	Ecad-mCh	head 16	cell 3	head 16cell 3	10	75.864	622.269	276.679	187.363	3065.54	61.497	1
apkc_mutant_Ecad-mCh	Ecad-mCh	head 16	cell 3	head 16cell 3	11	63.328	598.401	266.452	171.556	2917.74	51.307	1
apkc_mutant_Ecad-mCh	Ecad-mCh	head 16	cell 3	head 16cell 3	12	63.328	611.772	310.817	193.607	3448.145	51.305	1
apkc_mutant_Ecad-mCh	Ecad-mCh	head 16	cell 3	head 16cell 3	13	56.628	623.084	359.791	185.139	3212.519	45.859	1
apkc_mutant_Ecad-mCh	Ecad-mCh	head 16	cell 3	head 16cell 3	14	42.579	557.931	274.448	167.903	3292.287	34.439	1
apkc_mutant_Ecad-mCh	Ecad-mCh	head 16	cell 3	head 16cell 3	15	52.089	514.925	233.323	165.678	2781.006	42.17	1
apkc_mutant_Ecad-mCh	Ecad-mCh	head 16	cell 3	head 16cell 3	16	30.475	582.714	258.344	218.476	2363.271	24.6	1
apkc_mutant_Ecad-mCh	Ecad-mCh	head 16	cell 4	head 16cell 4	1	108.285	203.255	47.321	143.668	512.492	87.841	1
apkc_mutant_Ecad-mCh	Ecad-mCh	head 16	cell 4	head 16cell 4	2	108.285	235.177	70.824	142.269	763.99	87.841	1
apkc_mutant_Ecad-mCh	Ecad-mCh	head 16	cell 4	head 16cell 4	3	108.285	284.843	105.845	143.959	985.697	87.841	1
apkc_mutant_Ecad-mCh	Ecad-mCh	head 16	cell 4	head 16cell 4	4	107.636	334.24	124.8	142.891	1131.442	87.32	1
apkc_mutant_Ecad-mCh	Ecad-mCh	head 16	cell 4	head 16cell 4	5	107.636	363.241	137.924	148.691	1392.682	87.32	1
apkc_mutant_Ecad-mCh	Ecad-mCh	head 16	cell 4	head 16cell 4	6	107.636	405.251	179.258	149	2253.643	87.32	1
apkc_mutant_Ecad-mCh	Ecad-mCh	head 16	cell 4	head 16cell 4	7	105.259	397.86	149.188	147.847	2084.691	85.386	1
apkc_mutant_Ecad-mCh	Ecad-mCh	head 16	cell 4	head 16cell 4	8	105.259	416.848	146.065	150.739	1859.944	85.386	1
apkc_mutant_Ecad-mCh	Ecad-mCh	head 16	cell 4	head 16cell 4	9	104.178	447.64	172.67	147.177	2597.253	84.503	1
apkc_mutant_Ecad-mCh	Ecad-mCh	head 16	cell 4	head 16cell 4	10	104.178	468.02	200.688	153.882	2877.212	84.503	1
apkc_mutant_Ecad-mCh	Ecad-mCh	head 16	cell 4	head 16cell 4	11	100.071	448.622	152.079	170.441	1533.887	81.172	1
apkc_mutant_Ecad-mCh	Ecad-mCh	head 16	cell 4	head 16cell 4	12	100.071	433.513	133.281	166.052	1216.784	81.172	1
apkc_mutant_Ecad-mCh	Ecad-mCh	head 16	cell 4	head 16cell 4	13	98.991	438.453	181.112	153.182	2516.002	80.288	1
apkc_mutant_Ecad-mCh	Ecad-mCh	head 16	cell 4	head 16cell 4	14	97.91	433.358	153.095	170.478	2132.43	79.418	1
apkc_mutant_Ecad-mCh	Ecad-mCh	head 16	cell 4	head 16cell 4	15	64.625	426.905	155.952	155.609	1756.204	52.357	1
apkc_mutant_Ecad-mCh	Ecad-mCh	head 16	cell 4	head 16cell 4	16	11.023	403.129	125.563	153.643	948.216	8.786	1
apkc_mutant_Ecad-mCh	Ecad-mCh	head 17	cell 1	head 17cell 1	1	73.487	213.104	53.72	143.28	547.518	59.563	1
apkc_mutant_Ecad-mCh	Ecad-mCh	head 17	cell 1	head 17cell 1	2	73.487	253.04	81.824	136.462	718.786	59.563	1
apkc_mutant_Ecad-mCh	Ecad-mCh	head 17	cell 1	head 17cell 1	3	73.487	280.937	110.144	145.188	878.87	59.563	1
apkc_mutant_Ecad-mCh	Ecad-mCh	head 17	cell 1	head 17cell 1	4	73.487	374.365	187.947	148	1331.011	59.563	1
apkc_mutant_Ecad-mCh	Ecad-mCh	head 17	cell 1	head 17cell 1	5	73.487	483.546	312.903	146.55	2105.57	59.563	1
apkc_mutant_Ecad-mCh	Ecad-mCh	head 17	cell 1	head 17cell 1	6	73.487	598.592	502.731	149.369	3927.587	59.563	1
apkc_mutant_Ecad-mCh	Ecad-mCh	head 17	cell 1	head 17cell 1	7	73.487	594.275	537.483	151.228	4091.824	59.563	1
apkc_mutant_Ecad-mCh	Ecad-mCh	head 17	cell 1	head 17cell 1	8	75.432	594.461	406.998	161.068	3380.377	61.145	1
apkc_mutant_Ecad-mCh	Ecad-mCh	head 17	cell 1	head 17cell 1	9	75.432	517.126	270.736	153.26	2263.677	61.145	1
apkc_mutant_Ecad-mCh	Ecad-mCh	head 17	cell 1	head 17cell 1	10	76.729	471.893	195.248	172.278	1443.149	62.2	1
apkc_mutant_Ecad-mCh	Ecad-mCh	head 17	cell 1	head 17cell 1	11	76.729	396.71	126.766	151.879	1151.663	62.2	1
apkc_mutant_Ecad-mCh	Ecad-mCh	head 17	cell 1	head 17cell 1	12	39.985	399.744	111.543	165.15	979.793	32.33	1
apkc_mutant_Ecad-mCh	Ecad-mCh	head 17	cell 1	head 17cell 1	13	27.882	398.317	100.664	159.402	797.888	22.49	1
apkc_mutant_Ecad-mCh	Ecad-mCh	head 17	cell 1	head 17cell 1	14	45.389	374.643	94.547	154.532	781.49	36.722	1
apkc_mutant_Ecad-mCh	Ecad-mCh	head 17	cell 2	head 17cell 2	1	95.749	187.079	32.045	141.078	368.826	77.649	1
apkc_mutant_Ecad-mCh	Ecad-mCh	head 17	cell 2	head 17cell 2	2	95.749	222.601	61.44	138.133	578.349	77.649	1
apkc_mutant_Ecad-mCh	Ecad-mCh	head 17	cell 2	head 17cell 2	3	95.749	252.061	88.146	139.47	783.227	77.649	1
apkc_mutant_Ecad-mCh	Ecad-mCh	head 17	cell 2	head 17cell 2	4	95.749	295.116	127.555	142.993	934.709	77.649	1
apkc_mutant_Ecad-mCh	Ecad-mCh	head 17	cell 2	head 17cell 2	5	95.749	364.335	200.514	145.175	1752.678	77.649	1
apkc_mutant_Ecad-mCh	Ecad-mCh	head 17	cell 2	head 17cell 2	6	95.749	414.035	268.077	143.563	2458.951	77.649	1
apkc_mutant_Ecad-mCh	Ecad-mCh	head 17	cell 2	head 17cell 2	7	95.749	454.171	322.513	147.294	3146.597	77.649	1
apkc_mutant_Ecad-mCh	Ecad-mCh	head 17	cell 2	head 17cell 2	8	95.749	435.421	251.89	147.177	2625.18	77.649	1
apkc_mutant_Ecad-mCh	Ecad-mCh	head 17	cell 2	head 17cell 2	9	97.478	411.943	192.245	149.017	1431.535	79.058	1
apkc_mutant_Ecad-mCh	Ecad-mCh	head 17	cell 2	head 17cell 2	10	97.478	379.659	141.705	149.137	1153.583	79.058	1
apkc_mutant_Ecad-mCh	Ecad-mCh	head 17	cell 2	head 17cell 2	11	100.071	350.769	116.828	144.068	922.726	81.173	1
apkc_mutant_Ecad-mCh	Ecad-mCh	head 17	cell 2	head 17cell 2	12	47.118	328.207	108.35	150.565	862.816	38.127	1
apkc_mutant_Ecad-mCh	Ecad-mCh	head 17	cell 2	head 17cell 2	13	37.824	322.015	95.12	154.543	807.258	30.573	1
apkc_mutant_Ecad-mCh	Ecad-mCh	head 17	cell 2	head 17cell 2	14	23.559	300.015	70.744	144.986	550.052	18.977	1
apkc_mutant_Ecad-mCh	Ecad-mCh	head 17	cell 2	head 17cell 2	15	17.723	283.341	70.721	145.131	566.694	14.233	1
apkc_mutant_Ecad-mCh	Ecad-mCh	head 17	cell 3	head 17cell 3	1	107.636	202.479	50.084	141.281	599.061	87.317	1
apkc_mutant_Ecad-mCh	Ecad-mCh	head 17	cell 3	head 17cell 3	2	107.636	227.466	71.773	142.698	864.572	87.317	1
apkc_mutant_Ecad-mCh	Ecad-mCh	head 17	cell 3	head 17cell 3	3	107.636	256.275	97.357	141.863	741.279	87.317	1
apkc_mutant_Ecad-mCh	Ecad-mCh	head 17	cell 3	head 17cell 3	4	107.636	325.692	169.339	143.481	1262.288	87.317	1
apkc_mutant_Ecad-mCh	Ecad-mCh	head 17	cell 3	head 17cell 3	5	107.636	448.821	317.099	142.262	2430.713	87.317	1
apkc_mutant_Ecad-mCh	Ecad-mCh	head 17	cell 3	head 17cell 3	6	107.636	593.608	569.713	144.597	4095	87.317	1
apkc_mutant_Ecad-mCh	Ecad-mCh	head 17	cell 3	head 17cell 3	7	107.636	595.604	580.713	145.8	4094.473	87.317	1
apkc_mutant_Ecad-mCh	Ecad-mCh	head 17	cell 3	head 17cell 3	8	107.636	537.752	451.431	141.543	3675.94	87.317	1
apkc_mutant_Ecad-mCh	Ecad-mCh	head 17	cell 3	head 17cell 3	9	108.068	476.523	270.341	147.829	1877.873	87.668	1
apkc_mutant_Ecad-mCh	Ecad-mCh	head 17	cell 3	head 17cell 3	10	110.014	448.007	199.362	147.934	1505.73	89.25	1
apkc_mutant_Ecad-mCh	Ecad-mCh	head 17	cell 3	head 17cell 3	11	110.014	396.92	142.867	149.27	1228.388	89.25	1
apkc_mutant_Ecad-mCh	Ecad-mCh	head 17	cell 3	head 17cell 3	12	70.028	357.358	107.72	149.007	898.363	56.755	1
apkc_mutant_Ecad-mCh	Ecad-mCh	head 17	cell 3	head 17cell 3	13	43.227	336.857	107.653	145.993	942.755	34.967	1
apkc_mutant_Ecad-mCh	Ecad-mCh	head 17	cell 3	head 17cell 3	14	14.049	352.555	96.563	152.493	863.738	11.246	1
apkc_mutant_Ecad-mCh	Ecad-mCh	head 17	cell 3	head 17cell 3	15	18.155	332.292	82.576	151.092	645.66	14.584	1
apkc_mutant_Ecad-mCh	Ecad-mCh	head 17	cell 3	head 17cell 3	16	17.939	317.75	85.088	164.441	768.937	14.409	1
apkc_mutant_Ecad-mCh	Ecad-mCh	head 17	cell 4	head 17cell 4	1	74.999	181.966	32.081	133.994	405.797	60.794	1
apkc_mutant_Ecad-mCh	Ecad-mCh	head 17	cell 4	head 17cell 4	2	74.999	205.658	52.115	137.157	640.765	60.794	1
apkc_mutant_Ecad-mCh	Ecad-mCh	head 17	cell 4	head 17cell 4	3	74.999	221.471	66.926	140.152	809.614	60.794	1
apkc_mutant_Ecad-mCh	Ecad-mCh	head 17	cell 4	head 17cell 4	4	74.999	253.163	104.262	142.506	1280.081	60.794	1
apkc_mutant_Ecad-mCh	Ecad-mCh	head 17	cell 4	head 17cell 4	5	74.999	357.297	224.316	137.155	3136.995	60.794	1
apkc_mutant_Ecad-mCh	Ecad-mCh	head 17	cell 4	head 17cell 4	6	74.999	495.207	386.555	136.673	3907.383	60.794	1
apkc_mutant_Ecad-mCh	Ecad-mCh	head 17	cell 4	head 17cell 4	7	73.487	611.103	488.002	150.194	4091.878	59.566	1
apkc_mutant_Ecad-mCh	Ecad-mCh	head 17	cell 4	head 17cell 4	8	73.487	593.312	424.805	149	3735.081	59.566	1
apkc_mutant_Ecad-mCh	Ecad-mCh	head 17	cell 4	head 17cell 4	9	73.487	554.866	295.758	142.059	1934.504	59.566	1
apkc_mutant_Ecad-mCh	Ecad-mCh	head 17	cell 4	head 17cell 4	10	73.487	511.089	223.428	153.93	1573.895	59.566	1
apkc_mutant_Ecad-mCh	Ecad-mCh	head 17	cell 4	head 17cell 4	11	69.812	474.904	179.434	163.478	1428.604	56.578	1
apkc_mutant_Ecad-mCh	Ecad-mCh	head 17	cell 4	head 17cell 4	12	33.933	476.618	173.132	166.357	1264.188	27.41	1
apkc_mutant_Ecad-mCh	Ecad-mCh	head 17	cell 4	head 17cell 4	13	30.691	468.584	154.461	217.941	1099.003	24.775	1
apkc_mutant_Ecad-mCh	Ecad-mCh	head 17	cell 4	head 17cell 4	14	16.859	458.707	136.33	200.413	959.933	13.53	1
apkc_mutant_Ecad-mCh	Ecad-mCh	head 17	cell 5	head 17cell 5	1	73.703	198.891	42.888	139.784	427.081	59.738	1
apkc_mutant_Ecad-mCh	Ecad-mCh	head 17	cell 5	head 17cell 5	2	73.703	210.989	55.893	139.932	579.808	59.738	1
apkc_mutant_Ecad-mCh	Ecad-mCh	head 17	cell 5	head 17cell 5	3	73.703	239.377	84.716	144.49	750.736	59.738	1
apkc_mutant_Ecad-mCh	Ecad-mCh	head 17	cell 5	head 17cell 5	4	73.703	310.15	174.452	141.829	1792.477	59.738	1
apkc_mutant_Ecad-mCh	Ecad-mCh	head 17	cell 5	head 17cell 5	5	73.054	439.876	316.542	146.855	2807.401	59.213	1
apkc_mutant_Ecad-mCh	Ecad-mCh	head 17	cell 5	head 17cell 5	6	73.054	665.4	572.977	148.058	4074.423	59.213	1
apkc_mutant_Ecad-mCh	Ecad-mCh	head 17	cell 5	head 17cell 5	7	73.054	716.249	639.197	149.203	4095	59.213	1
apkc_mutant_Ecad-mCh	Ecad-mCh	head 17	cell 5	head 17cell 5	8	73.054	681.652	589.773	149.609	4095	59.213	1
apkc_mutant_Ecad-mCh	Ecad-mCh	head 17	cell 5	head 17cell 5	9	73.054	636.325	515.744	150.517	4023.975	59.213	1
apkc_mutant_Ecad-mCh	Ecad-mCh	head 17	cell 5	head 17cell 5	10	73.054	568.826	362.202	165.868	3037.438	59.213	1
apkc_mutant_Ecad-mCh	Ecad-mCh	head 17	cell 5	head 17cell 5	11	73.054	473.017	233.388	150.225	1705.748	59.213	1
apkc_mutant_Ecad-mCh	Ecad-mCh	head 17	cell 5	head 17cell 5	12	65.057	457.868	180.531	171.567	1350.818	52.713	1
apkc_mutant_Ecad-mCh	Ecad-mCh	head 17	cell 5	head 17cell 5	13	22.478	522.404	175.69	162.441	1154.978	18.098	1
apkc_mutant_Ecad-mCh	Ecad-mCh	head 17	cell 5	head 17cell 5	14	18.155	488.097	175.533	180.475	1045.499	14.584	1
apkc_mutant_Ecad-mCh	Ecad-mCh	head 17	cell 5	head 17cell 5	15	17.723	487.462	150.824	174.062	963.411	14.233	1
apkc_mutant_Ecad-mCh	Ecad-mCh	head 18	cell 1	head 18cell 1	1	62.896	204.568	47.353	142.005	619.232	50.942	1
apkc_mutant_Ecad-mCh	Ecad-mCh	head 18	cell 1	head 18cell 1	2	62.896	232.019	73.022	146.259	755.03	50.942	1
apkc_mutant_Ecad-mCh	Ecad-mCh	head 18	cell 1	head 18cell 1	3	62.896	267.242	113.03	145.135	1333.2	50.942	1
apkc_mutant_Ecad-mCh	Ecad-mCh	head 18	cell 1	head 18cell 1	4	62.896	459.809	341.043	143.184	3015.73	50.942	1
apkc_mutant_Ecad-mCh	Ecad-mCh	head 18	cell 1	head 18cell 1	5	62.247	551.126	382.318	148.762	2769.672	50.426	1
apkc_mutant_Ecad-mCh	Ecad-mCh	head 18	cell 1	head 18cell 1	6	62.247	531.351	325.965	148.031	2801.388	50.426	1
apkc_mutant_Ecad-mCh	Ecad-mCh	head 18	cell 1	head 18cell 1	7	64.625	518.742	269.398	149.018	2628.652	52.36	1
apkc_mutant_Ecad-mCh	Ecad-mCh	head 18	cell 1	head 18cell 1	8	64.625	519.004	260.14	156.026	1979.691	52.36	1
apkc_mutant_Ecad-mCh	Ecad-mCh	head 18	cell 1	head 18cell 1	9	64.625	522.964	268.495	149.614	2068.2	52.36	1
apkc_mutant_Ecad-mCh	Ecad-mCh	head 18	cell 1	head 18cell 1	10	64.625	511.719	266.559	158.387	2260.568	52.36	1
apkc_mutant_Ecad-mCh	Ecad-mCh	head 18	cell 1	head 18cell 1	11	66.138	554.667	252.219	154.624	1646.536	53.592	1
apkc_mutant_Ecad-mCh	Ecad-mCh	head 18	cell 1	head 18cell 1	12	66.138	555.58	244.826	165.938	1493.017	53.592	1
apkc_mutant_Ecad-mCh	Ecad-mCh	head 18	cell 1	head 18cell 1	13	66.138	546.382	238.348	148.16	1512.42	53.592	1
apkc_mutant_Ecad-mCh	Ecad-mCh	head 18	cell 1	head 18cell 1	14	66.786	525.558	195.672	156.315	1263.667	54.118	1
apkc_mutant_Ecad-mCh	Ecad-mCh	head 18	cell 1	head 18cell 1	15	66.786	494.342	178.773	159.651	1381.271	54.118	1
apkc_mutant_Ecad-mCh	Ecad-mCh	head 18	cell 1	head 18cell 1	16	63.76	461.17	172.711	159.246	1349.137	51.658	1
apkc_mutant_Ecad-mCh	Ecad-mCh	head 18	cell 1	head 18cell 1	17	61.167	465.751	175.943	157.294	1448.105	49.55	1
apkc_mutant_Ecad-mCh	Ecad-mCh	head 18	cell 1	head 18cell 1	18	54.466	454.737	167.253	166.343	1331.865	44.102	1
apkc_mutant_Ecad-mCh	Ecad-mCh	head 18	cell 1	head 18cell 1	19	54.25	458.225	161.059	184.341	1571.342	43.928	1
apkc_mutant_Ecad-mCh	Ecad-mCh	head 18	cell 1	head 18cell 1	20	54.25	427.233	137.711	163.57	1105.355	43.928	1
apkc_mutant_Ecad-mCh	Ecad-mCh	head 18	cell 1	head 18cell 1	21	54.25	382.22	128.047	155.825	1476.201	43.928	1
apkc_mutant_Ecad-mCh	Ecad-mCh	head 18	cell 2	head 18cell 2	1	98.991	199.7	41.754	141.696	419.67	80.297	1
apkc_mutant_Ecad-mCh	Ecad-mCh	head 18	cell 2	head 18cell 2	2	98.991	234.656	76.014	138.302	700.019	80.297	1
apkc_mutant_Ecad-mCh	Ecad-mCh	head 18	cell 2	head 18cell 2	3	98.991	284.826	121.151	137.297	937.829	80.297	1
apkc_mutant_Ecad-mCh	Ecad-mCh	head 18	cell 2	head 18cell 2	4	96.829	371.712	192.778	142.927	1416.853	78.519	1
apkc_mutant_Ecad-mCh	Ecad-mCh	head 18	cell 2	head 18cell 2	5	96.829	557.255	332.669	145.742	2446.437	78.519	1
apkc_mutant_Ecad-mCh	Ecad-mCh	head 18	cell 2	head 18cell 2	6	96.829	566.347	329.385	150.164	3034.307	78.519	1
apkc_mutant_Ecad-mCh	Ecad-mCh	head 18	cell 2	head 18cell 2	7	96.829	552.617	315.746	150.653	3514.947	78.519	1
apkc_mutant_Ecad-mCh	Ecad-mCh	head 18	cell 2	head 18cell 2	8	98.775	607.79	330.378	147.317	2292.567	80.106	1
apkc_mutant_Ecad-mCh	Ecad-mCh	head 18	cell 2	head 18cell 2	9	98.775	592.346	319.976	153.283	2297.721	80.106	1
apkc_mutant_Ecad-mCh	Ecad-mCh	head 18	cell 2	head 18cell 2	10	98.775	591.558	318.503	154.711	2413.35	80.106	1
apkc_mutant_Ecad-mCh	Ecad-mCh	head 18	cell 2	head 18cell 2	11	98.775	569.533	287.655	149.86	2138.76	80.106	1
apkc_mutant_Ecad-mCh	Ecad-mCh	head 18	cell 2	head 18cell 2	12	97.262	545.911	237.684	143.594	2201.058	78.887	1
apkc_mutant_Ecad-mCh	Ecad-mCh	head 18	cell 2	head 18cell 2	13	97.262	494.172	202.723	155.391	1760.942	78.887	1
apkc_mutant_Ecad-mCh	Ecad-mCh	head 18	cell 2	head 18cell 2	14	73.703	471.16	184.134	165.524	1388.119	59.736	1
apkc_mutant_Ecad-mCh	Ecad-mCh	head 18	cell 2	head 18cell 2	15	9.294	672.153	255.31	232.481	1579.837	7.38	1
apkc_mutant_Ecad-mCh	Ecad-mCh	head 18	cell 2	head 18cell 2	16	3.458	767.588	299.717	274.401	1543.138	2.636	1
apkc_mutant_Ecad-mCh	Ecad-mCh	head 18	cell 3	head 18cell 3	1	88.832	184.863	34.62	140.436	515.442	72.038	1
apkc_mutant_Ecad-mCh	Ecad-mCh	head 18	cell 3	head 18cell 3	2	88.832	207.334	57.206	141.746	708.544	72.038	1
apkc_mutant_Ecad-mCh	Ecad-mCh	head 18	cell 3	head 18cell 3	3	88.832	228.513	83.153	143.203	1046.241	72.038	1
apkc_mutant_Ecad-mCh	Ecad-mCh	head 18	cell 3	head 18cell 3	4	88.832	279.866	153.822	144.805	2052.666	72.038	1
apkc_mutant_Ecad-mCh	Ecad-mCh	head 18	cell 3	head 18cell 3	5	86.022	418.804	246.194	143.344	1970.791	69.754	1
apkc_mutant_Ecad-mCh	Ecad-mCh	head 18	cell 3	head 18cell 3	6	86.022	476.425	270.093	147.695	2233.144	69.754	1
apkc_mutant_Ecad-mCh	Ecad-mCh	head 18	cell 3	head 18cell 3	7	86.022	505.15	299.37	147.182	2454.126	69.754	1
apkc_mutant_Ecad-mCh	Ecad-mCh	head 18	cell 3	head 18cell 3	8	86.022	515.559	294.072	145.187	2449.489	69.754	1
apkc_mutant_Ecad-mCh	Ecad-mCh	head 18	cell 3	head 18cell 3	9	84.726	581.434	327.468	147.307	2699.809	68.701	1
apkc_mutant_Ecad-mCh	Ecad-mCh	head 18	cell 3	head 18cell 3	10	84.726	595.684	323.457	152.339	2523.829	68.701	1
apkc_mutant_Ecad-mCh	Ecad-mCh	head 18	cell 3	head 18cell 3	11	84.726	616.089	319.407	149.602	2030.146	68.701	1
apkc_mutant_Ecad-mCh	Ecad-mCh	head 18	cell 3	head 18cell 3	12	84.726	597.249	273.56	163.855	1751.132	68.701	1
apkc_mutant_Ecad-mCh	Ecad-mCh	head 18	cell 3	head 18cell 3	13	84.726	558.746	233.111	154.97	1706.353	68.701	1
apkc_mutant_Ecad-mCh	Ecad-mCh	head 18	cell 3	head 18cell 3	14	81.267	560.565	204.401	147.665	1542.051	65.834	1
apkc_mutant_Ecad-mCh	Ecad-mCh	head 18	cell 3	head 18cell 3	15	43.011	479.137	167.716	171.914	1167.038	34.788	1
apkc_mutant_Ecad-mCh	Ecad-mCh	head 18	cell 4	head 18cell 4	1	74.999	181.461	30.049	143.195	394.344	60.794	1
apkc_mutant_Ecad-mCh	Ecad-mCh	head 18	cell 4	head 18cell 4	2	74.999	212.723	49.861	136.799	470.412	60.794	1
apkc_mutant_Ecad-mCh	Ecad-mCh	head 18	cell 4	head 18cell 4	3	74.999	230.899	62.143	137.288	606.798	60.794	1
apkc_mutant_Ecad-mCh	Ecad-mCh	head 18	cell 4	head 18cell 4	4	74.999	324.052	153.256	142.534	1293.154	60.794	1
apkc_mutant_Ecad-mCh	Ecad-mCh	head 18	cell 4	head 18cell 4	5	75.216	409.991	218.087	141.232	1941.86	60.968	1
apkc_mutant_Ecad-mCh	Ecad-mCh	head 18	cell 4	head 18cell 4	6	75.216	408.49	223.029	148.131	2128.277	60.968	1
apkc_mutant_Ecad-mCh	Ecad-mCh	head 18	cell 4	head 18cell 4	7	75.216	392.534	196.735	146.27	2070.622	60.968	1
apkc_mutant_Ecad-mCh	Ecad-mCh	head 18	cell 4	head 18cell 4	8	72.838	452.492	213.964	161.695	2019.21	59.036	1
apkc_mutant_Ecad-mCh	Ecad-mCh	head 18	cell 4	head 18cell 4	9	72.838	455.59	210.261	150.934	1821.878	59.036	1
apkc_mutant_Ecad-mCh	Ecad-mCh	head 18	cell 4	head 18cell 4	10	72.838	449.902	191.387	151.007	1396.506	59.036	1
apkc_mutant_Ecad-mCh	Ecad-mCh	head 18	cell 4	head 18cell 4	11	73.703	467.659	179.25	148.903	1381.972	59.739	1
apkc_mutant_Ecad-mCh	Ecad-mCh	head 18	cell 4	head 18cell 4	12	73.703	442.468	165.501	148.865	1394.573	59.739	1
apkc_mutant_Ecad-mCh	Ecad-mCh	head 18	cell 4	head 18cell 4	13	73.703	415.253	158.654	157.727	1471.535	59.739	1
apkc_mutant_Ecad-mCh	Ecad-mCh	head 18	cell 4	head 18cell 4	14	70.677	427.093	160.646	157.041	1261.628	57.28	1
apkc_mutant_Ecad-mCh	Ecad-mCh	head 18	cell 4	head 18cell 4	15	31.772	427.575	129.214	160.198	1130.088	25.653	1
apkc_mutant_Ecad-mCh	Ecad-mCh	head 18	cell 5	head 18cell 5	1	73.487	182.981	31.945	142.374	357.932	59.563	1
apkc_mutant_Ecad-mCh	Ecad-mCh	head 18	cell 5	head 18cell 5	2	73.487	213.781	53.932	141.442	604.951	59.563	1
apkc_mutant_Ecad-mCh	Ecad-mCh	head 18	cell 5	head 18cell 5	3	73.487	232.835	72.322	139.229	667.996	59.563	1
apkc_mutant_Ecad-mCh	Ecad-mCh	head 18	cell 5	head 18cell 5	4	73.487	307.131	145.52	146.038	1345.381	59.563	1
apkc_mutant_Ecad-mCh	Ecad-mCh	head 18	cell 5	head 18cell 5	5	73.487	398.606	245.231	147.271	2055.956	59.563	1
apkc_mutant_Ecad-mCh	Ecad-mCh	head 18	cell 5	head 18cell 5	6	73.487	429.171	229.538	147.186	1944.115	59.563	1
apkc_mutant_Ecad-mCh	Ecad-mCh	head 18	cell 5	head 18cell 5	7	73.487	424.43	209.241	147.729	2019.909	59.563	1
apkc_mutant_Ecad-mCh	Ecad-mCh	head 18	cell 5	head 18cell 5	8	73.487	451.196	211.321	158.497	1815.066	59.563	1
apkc_mutant_Ecad-mCh	Ecad-mCh	head 18	cell 5	head 18cell 5	9	73.487	458.437	218.274	149.993	1949.531	59.563	1
apkc_mutant_Ecad-mCh	Ecad-mCh	head 18	cell 5	head 18cell 5	10	73.487	484.572	233.565	147.075	1805.014	59.563	1
apkc_mutant_Ecad-mCh	Ecad-mCh	head 18	cell 5	head 18cell 5	11	72.406	547.971	255.785	145.991	1619.376	58.683	1
apkc_mutant_Ecad-mCh	Ecad-mCh	head 18	cell 5	head 18cell 5	12	72.406	554.671	238.059	152.157	1579.62	58.683	1
apkc_mutant_Ecad-mCh	Ecad-mCh	head 18	cell 5	head 18cell 5	13	72.406	521.025	199.098	166.3	1747.989	58.683	1
apkc_mutant_Ecad-mCh	Ecad-mCh	head 18	cell 5	head 18cell 5	14	69.38	522.072	178.664	186.149	1313.511	56.225	1
apkc_mutant_Ecad-mCh	Ecad-mCh	head 18	cell 5	head 18cell 5	15	15.562	539.192	197.771	173.841	1252.285	12.476	1
apkc_mutant_Ecad-mCh	Ecad-mCh	head 18	cell 5	head 18cell 5	16	12.104	534.887	177.659	196.963	1143.033	9.664	1
apkc_mutant_Ecad-mCh	Ecad-mCh	head 18	cell 6	head 18cell 6	1	79.754	185.949	34.592	140.048	383.269	64.658	1
apkc_mutant_Ecad-mCh	Ecad-mCh	head 18	cell 6	head 18cell 6	2	79.754	218.001	56.676	141.957	595	64.658	1
apkc_mutant_Ecad-mCh	Ecad-mCh	head 18	cell 6	head 18cell 6	3	79.754	234.553	68.85	137.918	698.654	64.658	1
apkc_mutant_Ecad-mCh	Ecad-mCh	head 18	cell 6	head 18cell 6	4	79.754	347.146	177.831	143.344	1321.529	64.658	1
apkc_mutant_Ecad-mCh	Ecad-mCh	head 18	cell 6	head 18cell 6	5	79.754	444.626	265.385	139.103	2207.564	64.658	1
apkc_mutant_Ecad-mCh	Ecad-mCh	head 18	cell 6	head 18cell 6	6	79.754	455.256	260.036	143.897	2618.073	64.658	1
apkc_mutant_Ecad-mCh	Ecad-mCh	head 18	cell 6	head 18cell 6	7	79.754	464.546	247.64	143.945	2560.248	64.658	1
apkc_mutant_Ecad-mCh	Ecad-mCh	head 18	cell 6	head 18cell 6	8	79.754	491.267	267.883	148.386	2580.823	64.658	1
apkc_mutant_Ecad-mCh	Ecad-mCh	head 18	cell 6	head 18cell 6	9	79.754	507.98	265.8	141.482	2067.298	64.658	1
apkc_mutant_Ecad-mCh	Ecad-mCh	head 18	cell 6	head 18cell 6	10	79.538	524.673	266.926	150.296	1994.04	64.484	1
apkc_mutant_Ecad-mCh	Ecad-mCh	head 18	cell 6	head 18cell 6	11	79.538	536.199	244.326	150.088	1518.795	64.484	1
apkc_mutant_Ecad-mCh	Ecad-mCh	head 18	cell 6	head 18cell 6	12	79.538	502.522	206.543	161.927	1472.255	64.484	1
apkc_mutant_Ecad-mCh	Ecad-mCh	head 18	cell 6	head 18cell 6	13	60.951	487.873	187.383	140.389	1717.716	49.374	1
apkc_mutant_Ecad-mCh	Ecad-mCh	head 18	cell 6	head 18cell 6	14	29.395	465.339	165.018	152.218	1156.846	23.721	1
	Ecad-mCh
apkc_sibling_Ecad-mCh	Ecad-mCh	head 21	cell 1	head 21cell 1	1	118.875	222.291	52.65	139.415	493.026	96.461	1
apkc_sibling_Ecad-mCh	Ecad-mCh	head 21	cell 1	head 21cell 1	2	118.875	243.807	69.318	142.594	754.551	96.461	1
apkc_sibling_Ecad-mCh	Ecad-mCh	head 21	cell 1	head 21cell 1	3	118.875	298.497	119.729	140.83	1205.543	96.461	1
apkc_sibling_Ecad-mCh	Ecad-mCh	head 21	cell 1	head 21cell 1	4	119.091	390.971	204.275	145.437	1538.4	96.511	1
apkc_sibling_Ecad-mCh	Ecad-mCh	head 21	cell 1	head 21cell 1	5	119.308	500.985	309.554	140.856	2046.582	96.722	1
apkc_sibling_Ecad-mCh	Ecad-mCh	head 21	cell 1	head 21cell 1	6	119.091	648.486	391.68	146.425	2411.58	96.633	1
apkc_sibling_Ecad-mCh	Ecad-mCh	head 21	cell 1	head 21cell 1	7	119.091	736.25	413.286	133.461	3081.399	96.633	1
apkc_sibling_Ecad-mCh	Ecad-mCh	head 21	cell 1	head 21cell 1	8	119.091	777.6	421.822	161.047	3327.638	96.633	1
apkc_sibling_Ecad-mCh	Ecad-mCh	head 21	cell 1	head 21cell 1	9	119.091	798.446	410.513	180.468	3542.996	96.633	1
apkc_sibling_Ecad-mCh	Ecad-mCh	head 21	cell 1	head 21cell 1	10	117.795	829.132	434.832	182.815	3535.074	95.584	1
apkc_sibling_Ecad-mCh	Ecad-mCh	head 21	cell 1	head 21cell 1	11	117.795	875.171	456.761	171.926	3624.332	95.584	1
apkc_sibling_Ecad-mCh	Ecad-mCh	head 21	cell 1	head 21cell 1	12	117.795	924.367	482.228	174.134	3386.978	95.584	1
apkc_sibling_Ecad-mCh	Ecad-mCh	head 21	cell 1	head 21cell 1	13	117.795	939.333	427.007	192.497	3033.73	95.584	1
apkc_sibling_Ecad-mCh	Ecad-mCh	head 21	cell 1	head 21cell 1	14	99.423	919.109	415.368	220.649	2806.299	80.647	1
apkc_sibling_Ecad-mCh	Ecad-mCh	head 21	cell 1	head 21cell 1	15	86.887	890.712	394.622	182.509	2648.34	70.459	1
apkc_sibling_Ecad-mCh	Ecad-mCh	head 21	cell 1	head 21cell 1	16	74.135	880.409	355.99	246.109	2417.946	60.088	1
apkc_sibling_Ecad-mCh	Ecad-mCh	head 21	cell 1	head 21cell 1	17	73.703	921.084	337.632	267.233	2461.833	59.737	1
apkc_sibling_Ecad-mCh	Ecad-mCh	head 21	cell 1	head 21cell 1	18	22.911	923.082	336.377	317.468	2382.262	18.449	1
apkc_sibling_Ecad-mCh	Ecad-mCh	head 21	cell 2	head 21cell 2	1	117.578	212.023	45.569	141.993	455.895	95.411	1
apkc_sibling_Ecad-mCh	Ecad-mCh	head 21	cell 2	head 21cell 2	2	117.578	229.73	58.298	138.993	555.807	95.411	1
apkc_sibling_Ecad-mCh	Ecad-mCh	head 21	cell 2	head 21cell 2	3	117.578	273.957	94.495	141.284	849.755	95.411	1
apkc_sibling_Ecad-mCh	Ecad-mCh	head 21	cell 2	head 21cell 2	4	117.578	355.282	168.625	145.984	1253.71	95.411	1
apkc_sibling_Ecad-mCh	Ecad-mCh	head 21	cell 2	head 21cell 2	5	120.388	459.652	280.971	139.452	2160.092	97.687	1
apkc_sibling_Ecad-mCh	Ecad-mCh	head 21	cell 2	head 21cell 2	6	120.388	604.334	387.864	141.58	2536.726	97.687	1
apkc_sibling_Ecad-mCh	Ecad-mCh	head 21	cell 2	head 21cell 2	7	120.388	708.114	450.343	147.344	2933.084	97.687	1
apkc_sibling_Ecad-mCh	Ecad-mCh	head 21	cell 2	head 21cell 2	8	119.524	764.481	454.292	157.156	3023.096	96.989	1
apkc_sibling_Ecad-mCh	Ecad-mCh	head 21	cell 2	head 21cell 2	9	119.524	804.851	432.917	155.989	3595.261	96.989	1
apkc_sibling_Ecad-mCh	Ecad-mCh	head 21	cell 2	head 21cell 2	10	119.74	818.055	413.677	181.9	3248.465	97.165	1
apkc_sibling_Ecad-mCh	Ecad-mCh	head 21	cell 2	head 21cell 2	11	119.74	815.34	415.223	172.537	3448.083	97.165	1
apkc_sibling_Ecad-mCh	Ecad-mCh	head 21	cell 2	head 21cell 2	12	120.388	849.327	412.842	180.13	3097.481	97.696	1
apkc_sibling_Ecad-mCh	Ecad-mCh	head 21	cell 2	head 21cell 2	13	119.74	934.288	413.961	205.717	3078.033	97.167	1
apkc_sibling_Ecad-mCh	Ecad-mCh	head 21	cell 2	head 21cell 2	14	119.74	953.363	410.136	200.272	2925.433	97.167	1
apkc_sibling_Ecad-mCh	Ecad-mCh	head 21	cell 2	head 21cell 2	15	113.256	998.882	399.634	242.712	2465.128	91.894	1
apkc_sibling_Ecad-mCh	Ecad-mCh	head 21	cell 2	head 21cell 2	16	101.8	966.052	389.117	309.167	3433.387	82.581	1
apkc_sibling_Ecad-mCh	Ecad-mCh	head 21	cell 2	head 21cell 2	17	53.386	957.239	380.149	294.295	2996.003	43.225	1
apkc_sibling_Ecad-mCh	Ecad-mCh	head 21	cell 2	head 21cell 2	18	53.386	822.373	336.54	214.826	2435.714	43.225	1
apkc_sibling_Ecad-mCh	Ecad-mCh	head 22	cell 1	head 22cell 1	1	121.901	218.274	47.245	137.481	505.675	98.919	1
apkc_sibling_Ecad-mCh	Ecad-mCh	head 22	cell 1	head 22cell 1	2	121.901	265.582	83.462	142.679	754.442	98.919	1
apkc_sibling_Ecad-mCh	Ecad-mCh	head 22	cell 1	head 22cell 1	3	121.901	404.457	220.693	146.88	1648.652	98.919	1
apkc_sibling_Ecad-mCh	Ecad-mCh	head 22	cell 1	head 22cell 1	4	121.901	520.581	316.786	147.945	2358.883	98.919	1
apkc_sibling_Ecad-mCh	Ecad-mCh	head 22	cell 1	head 22cell 1	5	119.091	573.662	345.276	149.597	3061.372	96.637	1
apkc_sibling_Ecad-mCh	Ecad-mCh	head 22	cell 1	head 22cell 1	6	119.091	600.219	332.943	137.07	3188.351	96.637	1
apkc_sibling_Ecad-mCh	Ecad-mCh	head 22	cell 1	head 22cell 1	7	119.091	615.748	331.412	148.322	2793.726	96.637	1
apkc_sibling_Ecad-mCh	Ecad-mCh	head 22	cell 1	head 22cell 1	8	118.659	687.318	347.451	168.928	3039.713	96.283	1
apkc_sibling_Ecad-mCh	Ecad-mCh	head 22	cell 1	head 22cell 1	9	118.659	755.812	344.332	158.041	3351.884	96.283	1
apkc_sibling_Ecad-mCh	Ecad-mCh	head 22	cell 1	head 22cell 1	10	111.094	803.264	343.407	150.841	3927.076	90.135	1
apkc_sibling_Ecad-mCh	Ecad-mCh	head 22	cell 1	head 22cell 1	11	113.04	736.25	265.548	200.693	2223.689	91.72	1
apkc_sibling_Ecad-mCh	Ecad-mCh	head 22	cell 1	head 22cell 1	12	52.305	700.803	255.794	203.636	1799.079	42.348	1
apkc_sibling_Ecad-mCh	Ecad-mCh	head 22	cell 2	head 22cell 2	1	107.42	252.799	75.754	144.42	570.055	87.15	1
apkc_sibling_Ecad-mCh	Ecad-mCh	head 22	cell 2	head 22cell 2	2	107.42	361.955	178.965	145.723	1243.914	87.15	1
apkc_sibling_Ecad-mCh	Ecad-mCh	head 22	cell 2	head 22cell 2	3	107.42	438.479	241.083	140.403	1509.026	87.15	1
apkc_sibling_Ecad-mCh	Ecad-mCh	head 22	cell 2	head 22cell 2	4	107.42	488.889	259.034	151.385	1956.342	87.15	1
apkc_sibling_Ecad-mCh	Ecad-mCh	head 22	cell 2	head 22cell 2	5	107.42	518.322	251.25	155.729	2420.964	87.15	1
apkc_sibling_Ecad-mCh	Ecad-mCh	head 22	cell 2	head 22cell 2	6	107.42	573.67	249.734	147.081	2512.565	87.15	1
apkc_sibling_Ecad-mCh	Ecad-mCh	head 22	cell 2	head 22cell 2	7	109.365	627.781	260.616	169.39	2320.381	88.734	1
apkc_sibling_Ecad-mCh	Ecad-mCh	head 22	cell 2	head 22cell 2	8	75.648	718.315	311.43	174.751	2713.327	61.322	1
apkc_sibling_Ecad-mCh	Ecad-mCh	head 22	cell 2	head 22cell 2	9	57.709	783.214	342.997	184.841	2317.795	46.738	1
apkc_sibling_Ecad-mCh	Ecad-mCh	head 22	cell 2	head 22cell 2	10	9.51	833.934	283.974	261.878	1826.035	7.556	1
apkc_sibling_Ecad-mCh	Ecad-mCh	head 23	cell 1	head 23cell 1	1	114.769	238.474	74.224	139.511	838.743	93.127	1
apkc_sibling_Ecad-mCh	Ecad-mCh	head 23	cell 1	head 23cell 1	2	114.769	333.437	210.628	144.001	2275.503	93.127	1
apkc_sibling_Ecad-mCh	Ecad-mCh	head 23	cell 1	head 23cell 1	3	108.933	548.095	376.563	140.631	2602.288	88.383	1
apkc_sibling_Ecad-mCh	Ecad-mCh	head 23	cell 1	head 23cell 1	4	108.933	665.919	478.705	147.949	3892.711	88.383	1
apkc_sibling_Ecad-mCh	Ecad-mCh	head 23	cell 1	head 23cell 1	5	116.498	801.775	536.992	154.941	3711.086	94.533	1
apkc_sibling_Ecad-mCh	Ecad-mCh	head 23	cell 1	head 23cell 1	6	116.065	864.099	473.571	171.717	3983.375	94.182	1
apkc_sibling_Ecad-mCh	Ecad-mCh	head 23	cell 1	head 23cell 1	7	116.065	837.597	496.635	186.481	4095	94.182	1
apkc_sibling_Ecad-mCh	Ecad-mCh	head 23	cell 1	head 23cell 1	8	118.011	954.078	533.287	242.199	4091.587	95.763	1
apkc_sibling_Ecad-mCh	Ecad-mCh	head 23	cell 1	head 23cell 1	9	103.746	1061.838	466.908	271.481	3915.309	84.164	1
apkc_sibling_Ecad-mCh	Ecad-mCh	head 23	cell 1	head 23cell 1	10	110.446	1065.866	420.445	262.125	2888.706	89.608	1
apkc_sibling_Ecad-mCh	Ecad-mCh	head 23	cell 1	head 23cell 1	11	100.504	978.152	384.608	200.366	2517.07	81.528	1
apkc_sibling_Ecad-mCh	Ecad-mCh	head 23	cell 1	head 23cell 1	12	98.775	921.721	367.957	220.44	2710.766	80.125	1
apkc_sibling_Ecad-mCh	Ecad-mCh	head 23	cell 1	head 23cell 1	13	27.882	1029.04	416.477	358.232	2685.515	22.492	1
apkc_sibling_Ecad-mCh	Ecad-mCh	head 23	cell 1	head 23cell 1	14	26.585	1077.406	413.946	310.035	2409.752	21.437	1
apkc_sibling_Ecad-mCh	Ecad-mCh	head 23	cell 1	head 23cell 1	15	26.153	1010.239	357.101	394.787	2266.152	21.086	1
apkc_sibling_Ecad-mCh	Ecad-mCh	head 23	cell 1	head 23cell 1	16	23.343	978.87	362.298	310.58	2270.069	18.801	1
apkc_sibling_Ecad-mCh	Ecad-mCh	head 23	cell 1	head 23cell 1	17	22.478	854.372	317.254	275.103	1944.363	18.098	1
apkc_sibling_Ecad-mCh	Ecad-mCh	head 23	cell 1	head 23cell 1	18	18.372	848.074	334.501	295.76	2070.65	14.76	1
apkc_sibling_Ecad-mCh	Ecad-mCh	head 23	cell 2	head 23cell 2	1	113.04	276.412	83.457	145.715	929.354	91.716	1
apkc_sibling_Ecad-mCh	Ecad-mCh	head 23	cell 2	head 23cell 2	2	111.527	452.428	238.001	148.902	2097	90.484	1
apkc_sibling_Ecad-mCh	Ecad-mCh	head 23	cell 2	head 23cell 2	3	111.527	680.362	416.423	164.143	2929.587	90.484	1
apkc_sibling_Ecad-mCh	Ecad-mCh	head 23	cell 2	head 23cell 2	4	104.61	817.174	487.371	157.536	3973.887	84.868	1
apkc_sibling_Ecad-mCh	Ecad-mCh	head 23	cell 2	head 23cell 2	5	104.61	920.954	541.04	191.801	4066.678	84.868	1
apkc_sibling_Ecad-mCh	Ecad-mCh	head 23	cell 2	head 23cell 2	6	112.607	1046.596	569.936	212.74	4061.82	91.37	1
apkc_sibling_Ecad-mCh	Ecad-mCh	head 23	cell 2	head 23cell 2	7	112.607	1006.343	526.454	233.846	4095	91.37	1
apkc_sibling_Ecad-mCh	Ecad-mCh	head 23	cell 2	head 23cell 2	8	110.446	1002.96	456.444	221.995	3798.383	89.613	1
apkc_sibling_Ecad-mCh	Ecad-mCh	head 23	cell 2	head 23cell 2	9	104.61	1013.654	414.662	261.74	3714.11	84.866	1
apkc_sibling_Ecad-mCh	Ecad-mCh	head 23	cell 2	head 23cell 2	10	104.826	971.188	378.483	245.246	2921.463	85.044	1
apkc_sibling_Ecad-mCh	Ecad-mCh	head 23	cell 2	head 23cell 2	11	97.694	969.717	479.879	149.559	4095	79.246	1
apkc_sibling_Ecad-mCh	Ecad-mCh	head 23	cell 2	head 23cell 2	12	45.173	1081.027	479.203	209.668	3689.816	36.548	1
apkc_sibling_Ecad-mCh	Ecad-mCh	head 23	cell 2	head 23cell 2	13	43.011	975.918	460.375	231.499	2990.272	34.788	1
apkc_sibling_Ecad-mCh	Ecad-mCh	head 23	cell 2	head 23cell 2	14	30.475	1051.546	464.579	297.475	3100.668	24.599	1
apkc_sibling_Ecad-mCh	Ecad-mCh	head 23	cell 2	head 23cell 2	15	23.775	1004.378	412.897	301.512	2562.613	19.15	1
apkc_sibling_Ecad-mCh	Ecad-mCh	head 23	cell 3	head 23cell 3	1	116.065	239.678	66.394	143.233	577.886	94.18	1
apkc_sibling_Ecad-mCh	Ecad-mCh	head 23	cell 3	head 23cell 3	2	116.065	344.983	182.716	145.225	1371.497	94.18	1
apkc_sibling_Ecad-mCh	Ecad-mCh	head 23	cell 3	head 23cell 3	3	116.065	512.445	393.385	138.242	2517.766	94.18	1
apkc_sibling_Ecad-mCh	Ecad-mCh	head 23	cell 3	head 23cell 3	4	115.417	652.86	519.906	149	2804.858	93.653	1
apkc_sibling_Ecad-mCh	Ecad-mCh	head 23	cell 3	head 23cell 3	5	115.417	800.476	560.467	152.025	3908.559	93.653	1
apkc_sibling_Ecad-mCh	Ecad-mCh	head 23	cell 3	head 23cell 3	6	113.472	917.591	517.788	172.529	4024.721	92.071	1
apkc_sibling_Ecad-mCh	Ecad-mCh	head 23	cell 3	head 23cell 3	7	113.472	906.226	459.854	175.709	3968.468	92.071	1
apkc_sibling_Ecad-mCh	Ecad-mCh	head 23	cell 3	head 23cell 3	8	115.633	925.961	416.536	222.599	3958.518	93.828	1
apkc_sibling_Ecad-mCh	Ecad-mCh	head 23	cell 3	head 23cell 3	9	101.368	899.935	442.132	186.609	4095	82.233	1
apkc_sibling_Ecad-mCh	Ecad-mCh	head 23	cell 3	head 23cell 3	10	101.368	952.086	476.412	183.587	4037.809	82.233	1
apkc_sibling_Ecad-mCh	Ecad-mCh	head 23	cell 3	head 23cell 3	11	34.582	1145.712	477.288	320.807	3540.119	27.939	1
apkc_sibling_Ecad-mCh	Ecad-mCh	head 23	cell 3	head 23cell 3	12	34.582	1139.275	478.574	321.276	3809.481	27.939	1
apkc_sibling_Ecad-mCh	Ecad-mCh	head 23	cell 3	head 23cell 3	13	26.801	1111.757	522.002	206.944	4054.51	21.613	1
apkc_sibling_Ecad-mCh	Ecad-mCh	head 23	cell 3	head 23cell 3	14	22.262	1024.868	496.786	232.121	3216.822	17.923	1
apkc_sibling_Ecad-mCh	Ecad-mCh	head 23	cell 3	head 23cell 3	15	5.403	1113.374	575.969	324	2805.5	4.217	1
apkc_sibling_Ecad-mCh	Ecad-mCh	head 24	cell 1	head 24cell 1	1	113.472	260.439	79.347	144.294	778.155	92.072	1
apkc_sibling_Ecad-mCh	Ecad-mCh	head 24	cell 1	head 24cell 1	2	113.472	327.724	141.783	146.377	1401.441	92.072	1
apkc_sibling_Ecad-mCh	Ecad-mCh	head 24	cell 1	head 24cell 1	3	113.472	567.752	409.091	150.4	3438.96	92.072	1
apkc_sibling_Ecad-mCh	Ecad-mCh	head 24	cell 1	head 24cell 1	4	112.175	819.192	574.908	140.724	4095	91.016	1
apkc_sibling_Ecad-mCh	Ecad-mCh	head 24	cell 1	head 24cell 1	5	112.175	978.311	605.573	193.341	4094.756	91.016	1
apkc_sibling_Ecad-mCh	Ecad-mCh	head 24	cell 1	head 24cell 1	6	112.175	1012.415	596.781	157.976	4085.726	91.016	1
apkc_sibling_Ecad-mCh	Ecad-mCh	head 24	cell 1	head 24cell 1	7	112.175	1016.259	599.824	166.88	4081.044	91.016	1
apkc_sibling_Ecad-mCh	Ecad-mCh	head 24	cell 1	head 24cell 1	8	111.31	1031.556	529.205	196.81	4093.208	90.316	1
apkc_sibling_Ecad-mCh	Ecad-mCh	head 24	cell 1	head 24cell 1	9	111.31	1071.162	547.911	260.616	4056.005	90.315	1
apkc_sibling_Ecad-mCh	Ecad-mCh	head 24	cell 1	head 24cell 1	10	106.772	1199.653	521.65	286.754	3861.848	86.624	1
apkc_sibling_Ecad-mCh	Ecad-mCh	head 24	cell 1	head 24cell 1	11	115.201	1071.754	485.875	263.567	3437.64	93.469	1
apkc_sibling_Ecad-mCh	Ecad-mCh	head 24	cell 1	head 24cell 1	12	92.29	1032.538	436.054	190.657	3188.115	74.851	1
apkc_sibling_Ecad-mCh	Ecad-mCh	head 24	cell 1	head 24cell 1	13	101.368	984.965	376.62	270.055	3474.676	82.229	1
apkc_sibling_Ecad-mCh	Ecad-mCh	head 24	cell 1	head 24cell 1	14	101.368	907.171	367.001	244.087	3363.963	82.229	1
apkc_sibling_Ecad-mCh	Ecad-mCh	head 24	cell 1	head 24cell 1	15	97.045	785.208	298.585	204.492	2790.998	78.719	1
apkc_sibling_Ecad-mCh	Ecad-mCh	head 24	cell 2	head 24cell 2	1	107.852	270.643	77.346	144.547	668.935	87.504	1
apkc_sibling_Ecad-mCh	Ecad-mCh	head 24	cell 2	head 24cell 2	2	107.852	359.271	149.946	145.858	1274.448	87.504	1
apkc_sibling_Ecad-mCh	Ecad-mCh	head 24	cell 2	head 24cell 2	3	107.852	557.066	330.851	149.394	2858.983	87.504	1
apkc_sibling_Ecad-mCh	Ecad-mCh	head 24	cell 2	head 24cell 2	4	107.852	859.395	578.233	166.066	4058.064	87.504	1
apkc_sibling_Ecad-mCh	Ecad-mCh	head 24	cell 2	head 24cell 2	5	107.852	972.007	598.385	190.772	4020.456	87.504	1
apkc_sibling_Ecad-mCh	Ecad-mCh	head 24	cell 2	head 24cell 2	6	107.852	1041.896	600.801	221.713	4089.3	87.504	1
apkc_sibling_Ecad-mCh	Ecad-mCh	head 24	cell 2	head 24cell 2	7	108.068	1111.421	587.718	250.43	4089.693	87.678	1
apkc_sibling_Ecad-mCh	Ecad-mCh	head 24	cell 2	head 24cell 2	8	108.068	1242.941	651.69	255.088	4009.52	87.678	1
apkc_sibling_Ecad-mCh	Ecad-mCh	head 24	cell 2	head 24cell 2	9	110.446	1446.881	639.048	340.785	4095	89.607	1
apkc_sibling_Ecad-mCh	Ecad-mCh	head 24	cell 2	head 24cell 2	10	110.446	1182.288	474.48	367.167	4041.929	89.607	1
apkc_sibling_Ecad-mCh	Ecad-mCh	head 24	cell 2	head 24cell 2	11	32.637	1175.405	409.388	352.167	2838.301	26.357	1
apkc_sibling_Ecad-mCh	Ecad-mCh	head 24	cell 2	head 24cell 2	12	26.801	989.782	323.334	305.924	2049.426	21.613	1
apkc_sibling_Ecad-mCh	Ecad-mCh	head 24	cell 3	head 24cell 3	1	110.446	246.113	76.321	145.472	747.097	89.614	1
apkc_sibling_Ecad-mCh	Ecad-mCh	head 24	cell 3	head 24cell 3	2	110.446	318.866	156.242	144.254	1923.823	89.614	1
apkc_sibling_Ecad-mCh	Ecad-mCh	head 24	cell 3	head 24cell 3	3	110.446	444.338	287.684	148.513	3126.092	89.614	1
apkc_sibling_Ecad-mCh	Ecad-mCh	head 24	cell 3	head 24cell 3	4	110.446	717.866	513.092	150.169	4064.431	89.614	1
apkc_sibling_Ecad-mCh	Ecad-mCh	head 24	cell 3	head 24cell 3	5	110.446	787.419	530.692	167.813	4087.669	89.614	1
apkc_sibling_Ecad-mCh	Ecad-mCh	head 24	cell 3	head 24cell 3	6	110.446	812.957	493.588	166.83	3998.994	89.614	1
apkc_sibling_Ecad-mCh	Ecad-mCh	head 24	cell 3	head 24cell 3	7	110.446	809.811	477.249	172.065	3901.98	89.614	1
apkc_sibling_Ecad-mCh	Ecad-mCh	head 24	cell 3	head 24cell 3	8	111.527	848.627	461.65	191.561	3819.463	90.492	1
apkc_sibling_Ecad-mCh	Ecad-mCh	head 24	cell 3	head 24cell 3	9	110.446	1039.648	543.689	244.2	3991.852	89.614	1
apkc_sibling_Ecad-mCh	Ecad-mCh	head 24	cell 3	head 24cell 3	10	110.446	1005.402	532.363	239.32	3648.565	89.614	1
apkc_sibling_Ecad-mCh	Ecad-mCh	head 24	cell 3	head 24cell 3	11	107.852	1041.964	416.304	207.816	3006.648	87.5	1
apkc_sibling_Ecad-mCh	Ecad-mCh	head 24	cell 3	head 24cell 3	12	81.051	950.187	387.135	255.948	3524.833	65.714	1
apkc_sibling_Ecad-mCh	Ecad-mCh	head 24	cell 3	head 24cell 3	13	13.617	938.481	334.341	338.419	2272.048	10.894	1
apkc_sibling_Ecad-mCh	Ecad-mCh	head 25	cell 1	head 25cell 1	1	103.962	313.331	144.65	145.711	1403.487	84.337	1
apkc_sibling_Ecad-mCh	Ecad-mCh	head 25	cell 1	head 25cell 1	2	103.962	360.891	196.096	145.116	1865.544	84.337	1
apkc_sibling_Ecad-mCh	Ecad-mCh	head 25	cell 1	head 25cell 1	3	103.962	492.232	329.941	148.114	3531.73	84.337	1
apkc_sibling_Ecad-mCh	Ecad-mCh	head 25	cell 1	head 25cell 1	4	103.962	668.965	464.373	150.036	3623.191	84.337	1
apkc_sibling_Ecad-mCh	Ecad-mCh	head 25	cell 1	head 25cell 1	5	103.746	834.25	504.377	149.706	3550.588	84.163	1
apkc_sibling_Ecad-mCh	Ecad-mCh	head 25	cell 1	head 25cell 1	6	103.746	924.953	486.635	178.582	3564.203	84.163	1
apkc_sibling_Ecad-mCh	Ecad-mCh	head 25	cell 1	head 25cell 1	7	105.691	966.323	504.564	182.608	3751.279	85.745	1
apkc_sibling_Ecad-mCh	Ecad-mCh	head 25	cell 1	head 25cell 1	8	105.691	1025.153	517.417	165.191	3923.633	85.745	1
apkc_sibling_Ecad-mCh	Ecad-mCh	head 25	cell 1	head 25cell 1	9	107.636	1066.512	538.086	181.182	3579.407	87.325	1
apkc_sibling_Ecad-mCh	Ecad-mCh	head 25	cell 1	head 25cell 1	10	107.636	1158.583	510.099	234.003	3809.632	87.325	1
apkc_sibling_Ecad-mCh	Ecad-mCh	head 25	cell 1	head 25cell 1	11	99.207	1133.594	498.016	268.216	3597.502	80.473	1
apkc_sibling_Ecad-mCh	Ecad-mCh	head 25	cell 1	head 25cell 1	12	99.207	1087.148	464.214	202.671	3004.384	80.473	1
apkc_sibling_Ecad-mCh	Ecad-mCh	head 25	cell 1	head 25cell 1	13	87.968	1080.674	430.045	328.845	3044.505	71.337	1
apkc_sibling_Ecad-mCh	Ecad-mCh	head 25	cell 1	head 25cell 1	14	35.879	1269.483	446.997	383.461	2912.143	28.991	1
apkc_sibling_Ecad-mCh	Ecad-mCh	head 25	cell 1	head 25cell 1	15	29.827	1197.065	375.469	379.648	2631.064	24.069	1
apkc_mutant_Ecad-mCh	Ecad-mCh	head 21	cell 1	head 21cell 1	1	121.685	295.514	137.918	145.292	1350.163	98.748	1
apkc_mutant_Ecad-mCh	Ecad-mCh	head 21	cell 1	head 21cell 1	2	121.685	382.618	228.128	142.722	1988.495	98.748	1
apkc_mutant_Ecad-mCh	Ecad-mCh	head 21	cell 1	head 21cell 1	3	121.685	590.285	415.813	142.205	3401.05	98.748	1
apkc_mutant_Ecad-mCh	Ecad-mCh	head 21	cell 1	head 21cell 1	4	121.685	744.236	574.509	148.225	4091.642	98.748	1
apkc_mutant_Ecad-mCh	Ecad-mCh	head 21	cell 1	head 21cell 1	5	123.63	911.187	722.535	168.833	4095	100.328	1
apkc_mutant_Ecad-mCh	Ecad-mCh	head 21	cell 1	head 21cell 1	6	123.63	927.33	708.783	186.142	4095	100.328	1
apkc_mutant_Ecad-mCh	Ecad-mCh	head 21	cell 1	head 21cell 1	7	123.63	913.988	633.695	173.019	4095	100.328	1
apkc_mutant_Ecad-mCh	Ecad-mCh	head 21	cell 1	head 21cell 1	8	123.63	887.7	550.579	185.787	4095	100.328	1
apkc_mutant_Ecad-mCh	Ecad-mCh	head 21	cell 1	head 21cell 1	9	122.55	860.207	502.819	194.606	4074.736	99.448	1
apkc_mutant_Ecad-mCh	Ecad-mCh	head 21	cell 1	head 21cell 1	10	122.55	841.552	455.889	196.783	3988.35	99.448	1
apkc_mutant_Ecad-mCh	Ecad-mCh	head 21	cell 1	head 21cell 1	11	122.55	817.147	409.426	176.289	3548.181	99.448	1
apkc_mutant_Ecad-mCh	Ecad-mCh	head 21	cell 1	head 21cell 1	12	122.55	778.335	357.763	179.102	2931.397	99.448	1
apkc_mutant_Ecad-mCh	Ecad-mCh	head 21	cell 1	head 21cell 1	13	105.042	783.852	304.9	237.892	2347.364	85.213	1
apkc_mutant_Ecad-mCh	Ecad-mCh	head 21	cell 1	head 21cell 1	14	105.042	743.651	278.247	256.915	2568.971	85.213	1
apkc_mutant_Ecad-mCh	Ecad-mCh	head 21	cell 1	head 21cell 1	15	33.285	684.484	228.141	237.457	1833.345	26.881	1
apkc_mutant_Ecad-mCh	Ecad-mCh	head 21	cell 2	head 21cell 2	1	85.374	265.76	94.944	143.219	1060.332	69.229	1
apkc_mutant_Ecad-mCh	Ecad-mCh	head 21	cell 2	head 21cell 2	2	85.374	366.676	194.194	140.204	1628.477	69.229	1
apkc_mutant_Ecad-mCh	Ecad-mCh	head 21	cell 2	head 21cell 2	3	85.374	549.53	407.765	147.346	3430.061	69.229	1
apkc_mutant_Ecad-mCh	Ecad-mCh	head 21	cell 2	head 21cell 2	4	86.239	846.816	715.571	135.216	4095	69.931	1
apkc_mutant_Ecad-mCh	Ecad-mCh	head 21	cell 2	head 21cell 2	5	86.239	922.19	723.306	164.265	4095	69.931	1
apkc_mutant_Ecad-mCh	Ecad-mCh	head 21	cell 2	head 21cell 2	6	86.239	889.916	613.535	178.582	4095	69.931	1
apkc_mutant_Ecad-mCh	Ecad-mCh	head 21	cell 2	head 21cell 2	7	86.239	870.173	569.844	174.033	3964.813	69.931	1
apkc_mutant_Ecad-mCh	Ecad-mCh	head 21	cell 2	head 21cell 2	8	86.239	843.802	492.667	188.606	3304.897	69.931	1
apkc_mutant_Ecad-mCh	Ecad-mCh	head 21	cell 2	head 21cell 2	9	86.239	823.994	445.653	178.887	3272.143	69.931	1
apkc_mutant_Ecad-mCh	Ecad-mCh	head 21	cell 2	head 21cell 2	10	88.184	856.628	386.35	184.703	2783.969	71.511	1
apkc_mutant_Ecad-mCh	Ecad-mCh	head 21	cell 2	head 21cell 2	11	88.184	849.075	336.851	226.03	2517.96	71.511	1
apkc_mutant_Ecad-mCh	Ecad-mCh	head 21	cell 2	head 21cell 2	12	86.022	839.701	343.353	223.641	3293.622	69.756	1
apkc_mutant_Ecad-mCh	Ecad-mCh	head 21	cell 2	head 21cell 2	13	86.022	731.84	300.138	216.943	3994.6	69.756	1
apkc_mutant_Ecad-mCh	Ecad-mCh	head 21	cell 2	head 21cell 2	14	15.778	731.685	251.323	292.53	1610.865	12.652	1
apkc_mutant_Ecad-mCh	Ecad-mCh	head 21	cell 2	head 21cell 2	15	12.104	734.576	250.181	294.139	1671.336	9.664	1
apkc_mutant_Ecad-mCh	Ecad-mCh	head 21	cell 3	head 21cell 3	1	114.12	240.106	62.61	140.794	658.597	92.598	1
apkc_mutant_Ecad-mCh	Ecad-mCh	head 21	cell 3	head 21cell 3	2	114.12	342.567	156.817	135.113	1504.703	92.598	1
apkc_mutant_Ecad-mCh	Ecad-mCh	head 21	cell 3	head 21cell 3	3	114.12	507.837	321.221	143.385	3132.186	92.598	1
apkc_mutant_Ecad-mCh	Ecad-mCh	head 21	cell 3	head 21cell 3	4	114.12	775.688	603.832	150.743	4095	92.598	1
apkc_mutant_Ecad-mCh	Ecad-mCh	head 21	cell 3	head 21cell 3	5	114.12	1071.943	799.442	147.229	4095	92.598	1
apkc_mutant_Ecad-mCh	Ecad-mCh	head 21	cell 3	head 21cell 3	6	114.12	1144.216	851.523	142.876	4095	92.6	1
apkc_mutant_Ecad-mCh	Ecad-mCh	head 21	cell 3	head 21cell 3	7	114.12	1190.52	920.971	166.573	4095	92.6	1
apkc_mutant_Ecad-mCh	Ecad-mCh	head 21	cell 3	head 21cell 3	8	114.12	1180.48	915.164	192.514	4095	92.6	1
apkc_mutant_Ecad-mCh	Ecad-mCh	head 21	cell 3	head 21cell 3	9	114.12	1118.079	863.216	185.903	4095	92.6	1
apkc_mutant_Ecad-mCh	Ecad-mCh	head 21	cell 3	head 21cell 3	10	112.391	1116.206	828.885	205.493	4095	91.195	1
apkc_mutant_Ecad-mCh	Ecad-mCh	head 21	cell 3	head 21cell 3	11	112.391	1067.547	762.318	194.84	4095	91.195	1
apkc_mutant_Ecad-mCh	Ecad-mCh	head 21	cell 3	head 21cell 3	12	112.391	1018.382	678.597	164.436	4067.975	91.195	1
apkc_mutant_Ecad-mCh	Ecad-mCh	head 21	cell 3	head 21cell 3	13	112.391	967.057	580.552	204.595	4087.791	91.195	1
apkc_mutant_Ecad-mCh	Ecad-mCh	head 21	cell 3	head 21cell 3	14	90.129	887.065	472.992	250.434	3882.893	73.097	1
apkc_mutant_Ecad-mCh	Ecad-mCh	head 21	cell 3	head 21cell 3	15	16.426	922.624	272.951	332.562	1757.696	13.179	1
apkc_mutant_Ecad-mCh	Ecad-mCh	head 22	cell 1	head 22cell 1	1	94.02	226.336	70.912	144.084	947.107	76.257	1
apkc_mutant_Ecad-mCh	Ecad-mCh	head 22	cell 1	head 22cell 1	2	94.02	249.045	90.323	134.857	1434.741	76.257	1
apkc_mutant_Ecad-mCh	Ecad-mCh	head 22	cell 1	head 22cell 1	3	94.02	300.832	146.114	143.523	2049.259	76.257	1
apkc_mutant_Ecad-mCh	Ecad-mCh	head 22	cell 1	head 22cell 1	4	94.02	437.532	247.641	141.193	2991.665	76.257	1
apkc_mutant_Ecad-mCh	Ecad-mCh	head 22	cell 1	head 22cell 1	5	94.452	555.106	303.404	153.431	2425.582	76.606	1
apkc_mutant_Ecad-mCh	Ecad-mCh	head 22	cell 1	head 22cell 1	6	94.452	614.58	334.567	143.141	2349.771	76.606	1
apkc_mutant_Ecad-mCh	Ecad-mCh	head 22	cell 1	head 22cell 1	7	94.452	661.545	342.33	152.179	2847.594	76.606	1
apkc_mutant_Ecad-mCh	Ecad-mCh	head 22	cell 1	head 22cell 1	8	93.155	687.389	322.827	147.488	3279.057	75.554	1
apkc_mutant_Ecad-mCh	Ecad-mCh	head 22	cell 1	head 22cell 1	9	93.155	715.996	348.463	180.326	3423.677	75.554	1
apkc_mutant_Ecad-mCh	Ecad-mCh	head 22	cell 1	head 22cell 1	10	91.21	739.634	365.765	169.545	3788.449	73.973	1
apkc_mutant_Ecad-mCh	Ecad-mCh	head 22	cell 1	head 22cell 1	11	80.187	749.633	358.28	202.255	3357.308	65.013	1
apkc_mutant_Ecad-mCh	Ecad-mCh	head 22	cell 1	head 22cell 1	12	80.187	755.766	348.402	167.089	3729.898	65.013	1
apkc_mutant_Ecad-mCh	Ecad-mCh	head 22	cell 1	head 22cell 1	13	87.968	723.87	319.385	162.525	4081.972	71.336	1
apkc_mutant_Ecad-mCh	Ecad-mCh	head 22	cell 1	head 22cell 1	14	87.968	723.403	322.178	171.642	3847.674	71.336	1
apkc_mutant_Ecad-mCh	Ecad-mCh	head 22	cell 1	head 22cell 1	15	81.7	691.43	308.045	205.77	3987.129	66.24	1
apkc_mutant_Ecad-mCh	Ecad-mCh	head 22	cell 1	head 22cell 1	16	81.7	679.047	286.109	205.261	2376.598	66.24	1
apkc_mutant_Ecad-mCh	Ecad-mCh	head 22	cell 1	head 22cell 1	17	74.783	636.52	282.083	199.729	2021.353	60.62	1
apkc_mutant_Ecad-mCh	Ecad-mCh	head 22	cell 1	head 22cell 1	18	74.783	615.468	287.06	172.268	2414.042	60.62	1
apkc_mutant_Ecad-mCh	Ecad-mCh	head 22	cell 2	head 22cell 2	1	92.507	241.8	68.48	143.498	585.619	75.027	1
apkc_mutant_Ecad-mCh	Ecad-mCh	head 22	cell 2	head 22cell 2	2	92.507	293.53	121.808	146.195	1302.42	75.027	1
apkc_mutant_Ecad-mCh	Ecad-mCh	head 22	cell 2	head 22cell 2	3	92.507	350.107	171.543	145.506	1837.28	75.027	1
apkc_mutant_Ecad-mCh	Ecad-mCh	head 22	cell 2	head 22cell 2	4	93.371	398.683	232.353	147.477	2449.157	75.732	1
apkc_mutant_Ecad-mCh	Ecad-mCh	head 22	cell 2	head 22cell 2	5	93.371	545.136	368.063	147.524	3184.745	75.732	1
apkc_mutant_Ecad-mCh	Ecad-mCh	head 22	cell 2	head 22cell 2	6	93.371	669.513	440.856	149.447	2990.499	75.732	1
apkc_mutant_Ecad-mCh	Ecad-mCh	head 22	cell 2	head 22cell 2	7	93.371	715.325	447.967	147.629	3593.094	75.732	1
apkc_mutant_Ecad-mCh	Ecad-mCh	head 22	cell 2	head 22cell 2	8	93.371	774.217	442.139	173.619	3674.91	75.732	1
apkc_mutant_Ecad-mCh	Ecad-mCh	head 22	cell 2	head 22cell 2	9	92.939	862.671	421.125	179.593	3861.568	75.377	1
apkc_mutant_Ecad-mCh	Ecad-mCh	head 22	cell 2	head 22cell 2	10	92.939	880.703	395.452	209.428	3552.575	75.377	1
apkc_mutant_Ecad-mCh	Ecad-mCh	head 22	cell 2	head 22cell 2	11	82.132	868.961	405.23	233.803	3402.675	66.595	1
apkc_mutant_Ecad-mCh	Ecad-mCh	head 22	cell 2	head 22cell 2	12	82.132	902.425	393.242	241.663	3280.027	66.595	1
apkc_mutant_Ecad-mCh	Ecad-mCh	head 22	cell 2	head 22cell 2	13	71.109	919.023	397.666	229.642	2716.623	57.634	1
apkc_mutant_Ecad-mCh	Ecad-mCh	head 22	cell 2	head 22cell 2	14	68.948	869.886	436.042	168.521	3622.597	55.876	1
apkc_mutant_Ecad-mCh	Ecad-mCh	head 22	cell 2	head 22cell 2	15	68.948	838.652	424.013	205.156	3945.276	55.876	1
apkc_mutant_Ecad-mCh	Ecad-mCh	head 22	cell 2	head 22cell 2	16	68.948	786.046	386.459	180.447	3992.879	55.876	1
apkc_mutant_Ecad-mCh	Ecad-mCh	head 22	cell 2	head 22cell 2	17	53.17	769.936	378.521	189.592	3790.189	43.05	1
apkc_mutant_Ecad-mCh	Ecad-mCh	head 22	cell 2	head 22cell 2	18	53.17	723.093	314.803	175.424	2954.336	43.05	1
apkc_mutant_Ecad-mCh	Ecad-mCh	head 22	cell 2	head 22cell 2	19	47.118	671.151	261.246	193.401	1850.218	38.129	1
apkc_mutant_Ecad-mCh	Ecad-mCh	head 22	cell 2	head 22cell 2	20	47.118	651.354	256.759	201.885	2137.764	38.129	1
apkc_mutant_Ecad-mCh	Ecad-mCh	head 22	cell 2	head 22cell 2	21	47.118	605.396	243.118	198.524	1801.236	38.129	1
apkc_mutant_Ecad-mCh	Ecad-mCh	head 22	cell 2	head 22cell 2	22	44.308	527.703	185.193	183.153	1403.357	35.846	1
apkc_mutant_Ecad-mCh	Ecad-mCh	head 23	cell 1	head 23cell 1	1	103.962	224.418	54.657	143.897	664.662	84.34	1
apkc_mutant_Ecad-mCh	Ecad-mCh	head 23	cell 1	head 23cell 1	2	103.962	287.318	107.74	142.695	955.599	84.34	1
apkc_mutant_Ecad-mCh	Ecad-mCh	head 23	cell 1	head 23cell 1	3	103.962	469.323	298.247	133.273	2523.202	84.34	1
apkc_mutant_Ecad-mCh	Ecad-mCh	head 23	cell 1	head 23cell 1	4	103.962	645.13	470.031	145.183	3341.993	84.34	1
apkc_mutant_Ecad-mCh	Ecad-mCh	head 23	cell 1	head 23cell 1	5	106.123	851.627	623.17	148.839	4066.407	86.094	1
apkc_mutant_Ecad-mCh	Ecad-mCh	head 23	cell 1	head 23cell 1	6	106.123	987.789	648.187	150.24	4090.944	86.094	1
apkc_mutant_Ecad-mCh	Ecad-mCh	head 23	cell 1	head 23cell 1	7	106.123	997.032	622.081	157.181	4021.87	86.094	1
apkc_mutant_Ecad-mCh	Ecad-mCh	head 23	cell 1	head 23cell 1	8	106.123	1005.386	592.765	163.608	3906.072	86.094	1
apkc_mutant_Ecad-mCh	Ecad-mCh	head 23	cell 1	head 23cell 1	9	106.123	1003.37	579.272	179.959	3772.064	86.094	1
apkc_mutant_Ecad-mCh	Ecad-mCh	head 23	cell 1	head 23cell 1	10	102.449	1022.508	545.07	186.369	3826.151	83.111	1
apkc_mutant_Ecad-mCh	Ecad-mCh	head 23	cell 1	head 23cell 1	11	102.449	1047.963	549.069	209.29	3840.99	83.111	1
apkc_mutant_Ecad-mCh	Ecad-mCh	head 23	cell 1	head 23cell 1	12	102.449	1077.318	555.142	203.793	3995.647	83.111	1
apkc_mutant_Ecad-mCh	Ecad-mCh	head 23	cell 1	head 23cell 1	13	108.933	1091.971	515.799	214.163	3336.039	88.377	1
apkc_mutant_Ecad-mCh	Ecad-mCh	head 23	cell 1	head 23cell 1	14	108.933	1101.318	509.745	243.088	3423.625	88.377	1
apkc_mutant_Ecad-mCh	Ecad-mCh	head 23	cell 1	head 23cell 1	15	108.933	1062.647	448.114	239.048	3136.628	88.377	1
apkc_mutant_Ecad-mCh	Ecad-mCh	head 23	cell 1	head 23cell 1	16	96.613	916.502	388.852	264.15	2795.766	78.364	1
apkc_mutant_Ecad-mCh	Ecad-mCh	head 23	cell 2	head 23cell 2	1	97.478	194.041	36.605	138.988	391.928	79.065	1
apkc_mutant_Ecad-mCh	Ecad-mCh	head 23	cell 2	head 23cell 2	2	97.478	214.211	52.748	139.678	642.305	79.065	1
apkc_mutant_Ecad-mCh	Ecad-mCh	head 23	cell 2	head 23cell 2	3	97.478	273.983	116.545	136.409	1391.429	79.065	1
apkc_mutant_Ecad-mCh	Ecad-mCh	head 23	cell 2	head 23cell 2	4	97.478	347.654	209.225	145.4	2632.982	79.065	1
apkc_mutant_Ecad-mCh	Ecad-mCh	head 23	cell 2	head 23cell 2	5	97.478	478.075	359.573	141.95	4037.545	79.065	1
apkc_mutant_Ecad-mCh	Ecad-mCh	head 23	cell 2	head 23cell 2	6	97.478	686.68	488.743	143.523	4079.042	79.065	1
apkc_mutant_Ecad-mCh	Ecad-mCh	head 23	cell 2	head 23cell 2	7	97.478	811.947	535.811	153.657	4080.4	79.065	1
apkc_mutant_Ecad-mCh	Ecad-mCh	head 23	cell 2	head 23cell 2	8	97.478	854.515	550.667	155.135	4081.251	79.065	1
apkc_mutant_Ecad-mCh	Ecad-mCh	head 23	cell 2	head 23cell 2	9	96.613	914.653	529.428	161.166	3807.634	78.366	1
apkc_mutant_Ecad-mCh	Ecad-mCh	head 23	cell 2	head 23cell 2	10	96.613	935.129	490.627	193.156	3635.51	78.366	1
apkc_mutant_Ecad-mCh	Ecad-mCh	head 23	cell 2	head 23cell 2	11	96.613	933.675	476.825	220.625	3798.204	78.366	1
apkc_mutant_Ecad-mCh	Ecad-mCh	head 23	cell 2	head 23cell 2	12	95.749	964.809	454.966	223.666	3489.364	77.663	1
apkc_mutant_Ecad-mCh	Ecad-mCh	head 23	cell 2	head 23cell 2	13	95.749	980.838	424.549	199.378	2725.858	77.663	1
apkc_mutant_Ecad-mCh	Ecad-mCh	head 23	cell 2	head 23cell 2	14	97.262	995.379	426.198	230.158	2846.832	78.892	1
apkc_mutant_Ecad-mCh	Ecad-mCh	head 23	cell 2	head 23cell 2	15	97.262	995.514	403.265	197.169	2648.271	78.892	1
apkc_mutant_Ecad-mCh	Ecad-mCh	head 23	cell 2	head 23cell 2	16	96.397	960.557	370.714	234.857	3109.252	78.191	1
apkc_mutant_Ecad-mCh	Ecad-mCh	head 23	cell 2	head 23cell 2	17	96.397	902.112	340.14	207.541	2621.453	78.191	1
apkc_mutant_Ecad-mCh	Ecad-mCh	head 23	cell 2	head 23cell 2	18	35.879	866.141	328.864	257.636	2554.697	28.993	1
apkc_mutant_Ecad-mCh	Ecad-mCh	head 23	cell 2	head 23cell 2	19	33.069	791.675	266.275	309.101	2288.698	26.709	1
apkc_mutant_Ecad-mCh	Ecad-mCh	head 23	cell 3	head 23cell 3	1	106.339	224.114	60.494	140.023	611.593	86.268	1
apkc_mutant_Ecad-mCh	Ecad-mCh	head 23	cell 3	head 23cell 3	2	106.339	256.02	90.072	143.846	837.771	86.268	1
apkc_mutant_Ecad-mCh	Ecad-mCh	head 23	cell 3	head 23cell 3	3	106.339	321.921	157.129	141.768	1126.206	86.268	1
apkc_mutant_Ecad-mCh	Ecad-mCh	head 23	cell 3	head 23cell 3	4	106.339	488.637	323.315	142.166	2394.603	86.268	1
apkc_mutant_Ecad-mCh	Ecad-mCh	head 23	cell 3	head 23cell 3	5	106.339	602.001	406.523	145.977	3012.95	86.268	1
apkc_mutant_Ecad-mCh	Ecad-mCh	head 23	cell 3	head 23cell 3	6	106.339	668.387	443.468	143.721	3447.881	86.268	1
apkc_mutant_Ecad-mCh	Ecad-mCh	head 23	cell 3	head 23cell 3	7	106.339	809.951	497.388	146.828	3722.647	86.268	1
apkc_mutant_Ecad-mCh	Ecad-mCh	head 23	cell 3	head 23cell 3	8	105.475	897.303	526.708	145.245	3789.173	85.57	1
apkc_mutant_Ecad-mCh	Ecad-mCh	head 23	cell 3	head 23cell 3	9	105.475	930.616	528.014	149.448	4002.106	85.57	1
apkc_mutant_Ecad-mCh	Ecad-mCh	head 23	cell 3	head 23cell 3	10	105.475	988.751	534.51	176.1	3995.133	85.57	1
apkc_mutant_Ecad-mCh	Ecad-mCh	head 23	cell 3	head 23cell 3	11	105.475	1047.013	506.178	218.861	3357.997	85.57	1
apkc_mutant_Ecad-mCh	Ecad-mCh	head 23	cell 3	head 23cell 3	12	105.907	1036.611	501.935	186.945	3610.32	85.921	1
apkc_mutant_Ecad-mCh	Ecad-mCh	head 23	cell 3	head 23cell 3	13	105.907	1064.831	479.711	226.19	3372.476	85.921	1
apkc_mutant_Ecad-mCh	Ecad-mCh	head 23	cell 3	head 23cell 3	14	106.772	1027.652	430.335	259.447	3166.257	86.624	1
apkc_mutant_Ecad-mCh	Ecad-mCh	head 23	cell 3	head 23cell 3	15	92.507	997.705	378.117	246.628	3093.222	75.022	1
apkc_mutant_Ecad-mCh	Ecad-mCh	head 23	cell 3	head 23cell 3	16	92.507	915.131	327.512	283.132	2562.207	75.022	1
apkc_mutant_Ecad-mCh	Ecad-mCh	head 23	cell 3	head 23cell 3	17	39.553	900.724	309.041	285.289	2018.538	31.98	1
apkc_mutant_Ecad-mCh	Ecad-mCh	head 24	cell 1	head 24cell 1	1	86.455	209.498	50.183	0	492.811	70.107	1
apkc_mutant_Ecad-mCh	Ecad-mCh	head 24	cell 1	head 24cell 1	2	86.455	235.074	67.946	0	602.847	70.107	1
apkc_mutant_Ecad-mCh	Ecad-mCh	head 24	cell 1	head 24cell 1	3	86.455	299.116	115.246	0	980.779	70.107	1
apkc_mutant_Ecad-mCh	Ecad-mCh	head 24	cell 1	head 24cell 1	4	86.887	384.045	209.884	0	1644.787	70.458	1
apkc_mutant_Ecad-mCh	Ecad-mCh	head 24	cell 1	head 24cell 1	5	86.887	501.804	322.805	0	2570.597	70.458	1
apkc_mutant_Ecad-mCh	Ecad-mCh	head 24	cell 1	head 24cell 1	6	86.887	589.76	414.78	0	3445.108	70.458	1
apkc_mutant_Ecad-mCh	Ecad-mCh	head 24	cell 1	head 24cell 1	7	86.887	625.944	427.213	0	3319.051	70.458	1
apkc_mutant_Ecad-mCh	Ecad-mCh	head 24	cell 1	head 24cell 1	8	85.59	662.448	427.066	0	3328.509	69.406	1
apkc_mutant_Ecad-mCh	Ecad-mCh	head 24	cell 1	head 24cell 1	9	85.59	685.001	371.037	0	3230.578	69.406	1
apkc_mutant_Ecad-mCh	Ecad-mCh	head 24	cell 1	head 24cell 1	10	84.942	732.235	370.723	0	3139.851	68.877	1
apkc_mutant_Ecad-mCh	Ecad-mCh	head 24	cell 1	head 24cell 1	11	84.942	750.926	393.821	0	3731.94	68.877	1
apkc_mutant_Ecad-mCh	Ecad-mCh	head 24	cell 1	head 24cell 1	12	85.806	782.097	410.444	0	4061.895	69.582	1
apkc_mutant_Ecad-mCh	Ecad-mCh	head 24	cell 1	head 24cell 1	13	85.806	779.664	398.412	0	4064.503	69.582	1
apkc_mutant_Ecad-mCh	Ecad-mCh	head 24	cell 1	head 24cell 1	14	85.806	743.603	377.277	0	4064.637	69.582	1
apkc_mutant_Ecad-mCh	Ecad-mCh	head 24	cell 1	head 24cell 1	15	92.074	710.912	370.77	0	3900.391	74.676	1
apkc_mutant_Ecad-mCh	Ecad-mCh	head 24	cell 1	head 24cell 1	16	64.409	672.272	303.842	0	2178.847	52.186	1
apkc_mutant_Ecad-mCh	Ecad-mCh	head 24	cell 1	head 24cell 1	17	58.789	667.266	300.051	0	3030.98	47.618	1
apkc_mutant_Ecad-mCh	Ecad-mCh	head 24	cell 1	head 24cell 1	18	33.717	695.922	241.168	0	1846.013	27.235	1
apkc_mutant_Ecad-mCh	Ecad-mCh	head 24	cell 2	head 24cell 2	1	87.103	221.854	59.47	142.682	570.583	70.633	1
apkc_mutant_Ecad-mCh	Ecad-mCh	head 24	cell 2	head 24cell 2	2	87.103	258.358	89.975	140.025	951.496	70.633	1
apkc_mutant_Ecad-mCh	Ecad-mCh	head 24	cell 2	head 24cell 2	3	87.103	337.643	170.534	144.253	1760.362	70.633	1
apkc_mutant_Ecad-mCh	Ecad-mCh	head 24	cell 2	head 24cell 2	4	87.103	442.47	278.566	147.861	2704.177	70.633	1
apkc_mutant_Ecad-mCh	Ecad-mCh	head 24	cell 2	head 24cell 2	5	87.103	541.288	358.729	144.824	3302.236	70.633	1
apkc_mutant_Ecad-mCh	Ecad-mCh	head 24	cell 2	head 24cell 2	6	87.103	582.647	378.851	147.328	3126.027	70.633	1
apkc_mutant_Ecad-mCh	Ecad-mCh	head 24	cell 2	head 24cell 2	7	87.103	619.646	394.484	145.74	3039.945	70.633	1
apkc_mutant_Ecad-mCh	Ecad-mCh	head 24	cell 2	head 24cell 2	8	87.752	630.795	383.356	146.228	3278.551	71.162	1
apkc_mutant_Ecad-mCh	Ecad-mCh	head 24	cell 2	head 24cell 2	9	87.752	641.983	360.954	157.479	2983.877	71.162	1
apkc_mutant_Ecad-mCh	Ecad-mCh	head 24	cell 2	head 24cell 2	10	87.752	651.518	370.181	166.485	2998.139	71.162	1
apkc_mutant_Ecad-mCh	Ecad-mCh	head 24	cell 2	head 24cell 2	11	87.752	696.47	390.595	171.436	3422.715	71.162	1
apkc_mutant_Ecad-mCh	Ecad-mCh	head 24	cell 2	head 24cell 2	12	87.968	733.82	404.79	155.871	3036.133	71.338	1
apkc_mutant_Ecad-mCh	Ecad-mCh	head 24	cell 2	head 24cell 2	13	87.968	748.043	383.081	175.189	3061.721	71.338	1
apkc_mutant_Ecad-mCh	Ecad-mCh	head 24	cell 2	head 24cell 2	14	87.968	765.063	358.164	172.243	2721.248	71.338	1
apkc_mutant_Ecad-mCh	Ecad-mCh	head 24	cell 2	head 24cell 2	15	89.265	753.014	322.689	154.263	2317.635	72.391	1
apkc_mutant_Ecad-mCh	Ecad-mCh	head 24	cell 2	head 24cell 2	16	89.265	728.432	291.456	192.222	2356.267	72.391	1
apkc_mutant_Ecad-mCh	Ecad-mCh	head 24	cell 2	head 24cell 2	17	91.21	692.19	279.831	196.645	2187.131	73.973	1
apkc_mutant_Ecad-mCh	Ecad-mCh	head 24	cell 2	head 24cell 2	18	64.625	608.559	241.623	186.803	1920.344	52.361	1
apkc_mutant_Ecad-mCh	Ecad-mCh	head 24	cell 2	head 24cell 2	19	18.155	707.916	285.021	267.249	2172.38	14.584	1
apkc_mutant_Ecad-mCh	Ecad-mCh	head 24	cell 3	head 24cell 3	1	106.123	190.224	33.534	140.208	366.432	86.097	1
apkc_mutant_Ecad-mCh	Ecad-mCh	head 24	cell 3	head 24cell 3	2	106.123	199.573	41.532	140.31	561.741	86.097	1
apkc_mutant_Ecad-mCh	Ecad-mCh	head 24	cell 3	head 24cell 3	3	106.123	219.097	57.181	141.428	532.413	86.097	1
apkc_mutant_Ecad-mCh	Ecad-mCh	head 24	cell 3	head 24cell 3	4	106.123	247.36	80.769	146.514	760.094	86.097	1
apkc_mutant_Ecad-mCh	Ecad-mCh	head 24	cell 3	head 24cell 3	5	106.123	290.924	125.455	133.25	970.663	86.097	1
apkc_mutant_Ecad-mCh	Ecad-mCh	head 24	cell 3	head 24cell 3	6	106.123	326.606	169.934	140.281	1285.151	86.097	1
apkc_mutant_Ecad-mCh	Ecad-mCh	head 24	cell 3	head 24cell 3	7	105.042	394.741	223.727	143.981	1497.838	85.218	1
apkc_mutant_Ecad-mCh	Ecad-mCh	head 24	cell 3	head 24cell 3	8	105.042	591.35	391.406	147.511	2969.8	85.218	1
apkc_mutant_Ecad-mCh	Ecad-mCh	head 24	cell 3	head 24cell 3	9	105.042	704.69	471.483	146.949	3541.045	85.218	1
apkc_mutant_Ecad-mCh	Ecad-mCh	head 24	cell 3	head 24cell 3	10	105.042	727.881	476.982	161.753	3620.414	85.218	1
apkc_mutant_Ecad-mCh	Ecad-mCh	head 24	cell 3	head 24cell 3	11	105.042	755.449	434.048	162.832	3484.116	85.218	1
apkc_mutant_Ecad-mCh	Ecad-mCh	head 24	cell 3	head 24cell 3	12	105.042	782.577	411.686	183.231	3655.702	85.218	1
apkc_mutant_Ecad-mCh	Ecad-mCh	head 24	cell 3	head 24cell 3	13	105.042	794.644	411.448	159.491	3283.563	85.218	1
apkc_mutant_Ecad-mCh	Ecad-mCh	head 24	cell 3	head 24cell 3	14	105.042	833.202	432.416	170.626	3374.434	85.218	1
apkc_mutant_Ecad-mCh	Ecad-mCh	head 24	cell 3	head 24cell 3	15	104.826	873.037	429.228	158.749	3811.348	85.043	1
apkc_mutant_Ecad-mCh	Ecad-mCh	head 24	cell 3	head 24cell 3	16	104.826	896.557	406.708	158.203	3502.483	85.043	1
apkc_mutant_Ecad-mCh	Ecad-mCh	head 24	cell 3	head 24cell 3	17	104.826	907.24	396.882	199.615	3184.616	85.043	1
apkc_mutant_Ecad-mCh	Ecad-mCh	head 24	cell 3	head 24cell 3	18	86.022	903.962	368.17	242.396	2682.725	69.756	1
apkc_mutant_Ecad-mCh	Ecad-mCh	head 24	cell 3	head 24cell 3	19	87.752	906.775	343.096	209.805	2482.924	71.162	1
apkc_mutant_Ecad-mCh	Ecad-mCh	head 24	cell 3	head 24cell 3	20	87.752	834.491	321.856	221.747	3285.144	71.162	1
apkc_mutant_Ecad-mCh	Ecad-mCh	head 25	cell 1	head 25cell 1	1	101.368	209.931	53.472	143.691	632.554	82.232	1
apkc_mutant_Ecad-mCh	Ecad-mCh	head 25	cell 1	head 25cell 1	2	101.368	235.612	80.542	141.976	781.21	82.232	1
apkc_mutant_Ecad-mCh	Ecad-mCh	head 25	cell 1	head 25cell 1	3	101.368	286.889	134.252	144.887	1028.894	82.232	1
apkc_mutant_Ecad-mCh	Ecad-mCh	head 25	cell 1	head 25cell 1	4	101.368	379.752	241.405	143.87	2080.17	82.232	1
apkc_mutant_Ecad-mCh	Ecad-mCh	head 25	cell 1	head 25cell 1	5	100.071	465.406	325.937	142.848	3320.052	81.177	1
apkc_mutant_Ecad-mCh	Ecad-mCh	head 25	cell 1	head 25cell 1	6	100.071	487.376	347.878	148.517	3753.727	81.177	1
[truncated: 1,810 more rows]
