# Supplementary material for: Stepwise polarisation of developing bilayered epidermis is mediated by aPKC and E-cadherin in zebrafish
Source: eLife. 2020 Jan 22;9:e49064. doi: 10.7554/eLife.49064 (PMC6975926; doi:10.7554/eLife.49064)
Supplement: Figure 2—source data 1. [file elife-49064-fig2-data1.csv]

Genotype	Cell name	Area	Mean	Length	Boundary
aPKC sib	h1c1	49.107	313.962	75.348	Non
aPKC sib	h1c1	49.107	318.123	75.346	Non
aPKC sib	h1c1	49.107	449.555	75.355	Non
aPKC sib	h1c1	49.167	493.894	75.44	Non
aPKC sib	h1c1	49.167	558.725	75.44	Non
aPKC sib	h1c1	49.167	611.623	75.44	Non
aPKC sib	h1c1	48.743	724.461	74.774	Non
aPKC sib	h1c1	48.743	758.572	74.774	Non
aPKC sib	h1c1	48.683	819.459	74.673	Non
aPKC sib	h1c1	48.683	822.857	74.672	Non
aPKC sib	h1c2	50.62	274.573	77.674	Non
aPKC sib	h1c2	51.771	448.006	79.428	Non
aPKC sib	h1c2	51.771	576.305	79.428	Non
aPKC sib	h1c2	51.71	756.07	79.329	Non
aPKC sib	h1c2	51.71	955.814	79.342	Non
aPKC sib	h1c2	51.71	1101.758	79.351	Non
aPKC sib	h1c2	51.71	1155.176	79.351	Non
aPKC sib	h1c3	59.582	257.572	91.436	Non
aPKC sib	h1c3	58.734	424.528	90.106	Non
aPKC sib	h1c3	58.553	550.796	89.85	Non
aPKC sib	h1c3	58.31	679.931	89.486	Non
aPKC sib	h1c3	58.189	777.311	89.306	Non
aPKC sib	h1c3	57.887	867.512	88.822	Non
aPKC sib	h1c3	58.008	922.234	89.025	Non
aPKC sib	h1c3	58.008	900.156	89.015	Non
aPKC sib	h1c4	50.923	256.21	78.128	Non
aPKC sib	h1c4	50.62	373.668	77.669	Non
aPKC sib	h1c4	50.62	462.353	77.66	Non
aPKC sib	h1c4	50.62	536.05	77.656	Non
aPKC sib	h1c4	50.318	630.591	77.194	Non
aPKC sib	h1c4	50.318	664.359	77.194	Non
aPKC sib	h1c4	50.257	740.709	77.112	Non
aPKC sib	h1c4	50.318	811.424	77.191	Non
aPKC sib	h1c4	50.257	812.811	77.105	Non
aPKC sib	h1c4	49.652	770.477	76.182	Non
aPKC sib	h2c1	56.554	441.44	86.787	Non
aPKC sib	h2c1	56.554	562.139	86.787	Non
aPKC sib	h2c1	54.738	623.168	83.988	Non
aPKC sib	h2c1	54.738	645.135	83.988	Non
aPKC sib	h2c1	54.314	695.101	83.343	Non
aPKC sib	h2c1	54.314	675.195	83.343	Non
aPKC sib	h2c1	53.951	760.481	82.769	Non
aPKC sib	h2c1	55.162	810.403	84.659	Non
aPKC sib	h2c1	54.253	870.78	83.243	Non
aPKC sib	h2c1	54.314	878.142	83.346	Non
aPKC sib	h2c1	53.406	878.292	81.944	Non
aPKC sib	h2c1	53.345	920.93	81.858	Non
aPKC sib	h2c1	53.527	1024.118	82.121	Non
aPKC sib	h2c1	52.134	984.726	79.979	Non
aPKC sib	h2c2	47.593	558.701	73.023	Non
aPKC sib	h2c2	47.532	713.07	72.919	Non
aPKC sib	h2c2	47.532	715.362	72.919	Non
aPKC sib	h2c2	47.532	735.507	72.919	Non
aPKC sib	h2c2	47.532	783.965	72.919	Non
aPKC sib	h2c2	46.866	859.476	71.901	Non
aPKC sib	h2c2	45.474	960.499	69.764	Non
aPKC sib	h2c2	45.413	1090.142	69.668	Non
aPKC sib	h2c2	45.413	1145.851	69.668	Non
aPKC sib	h2c2	45.413	1094.171	69.668	Non
aPKC sib	h2c2	50.984	1066.809	78.231	Non
aPKC sib	h2c3	51.165	496.724	78.504	Non
aPKC sib	h2c3	51.165	585.659	78.504	Non
aPKC sib	h2c3	51.165	623.472	78.504	Non
aPKC sib	h2c3	50.802	701.167	77.951	Non
aPKC sib	h2c3	50.197	781.298	77.021	Non
aPKC sib	h2c3	50.075	937.951	76.813	Non
aPKC sib	h2c3	50.015	1111.288	76.722	Non
aPKC sib	h2c3	50.015	1105.397	76.722	Non
aPKC sib	h2c3	50.015	1066.176	76.722	Non
aPKC sib	h2c3	49.773	1075.247	76.363	Non
aPKC sib	h2c4	56.615	466.763	86.871	Non
aPKC sib	h2c4	56.554	590.213	86.789	Non
aPKC sib	h2c4	56.554	574.615	86.789	Non
aPKC sib	h2c4	57.099	662.47	87.619	Non
aPKC sib	h2c4	57.099	686.956	87.609	Non
aPKC sib	h2c4	56.918	768.087	87.344	Non
aPKC sib	h2c4	56.918	857.754	87.34	Non
aPKC sib	h2c4	56.009	962.692	85.944	Non
aPKC sib	h2c4	56.009	927.108	85.944	Non
aPKC sib	h2c4	56.009	932.818	85.944	Non
aPKC sib	h2c4	56.009	875.947	85.944	Non
aPKC sib	h2c5	56.736	678.381	87.068	Non
aPKC sib	h2c5	56.736	762.728	87.068	Non
aPKC sib	h2c5	56.736	787.908	87.068	Non
aPKC sib	h2c5	56.736	787.814	87.068	Non
aPKC sib	h2c5	57.099	986.329	87.625	Non
aPKC sib	h2c5	57.765	1136.04	88.634	Non
aPKC sib	h2c5	58.068	1279.179	89.125	Non
aPKC sib	h2c5	58.855	1277.439	90.319	Non
aPKC sib	h2c5	58.855	1230.564	90.319	Non
aPKC sib	h2c5	60.006	1249.72	92.099	Non
aPKC sib	h3c1	52.255	242.836	80.179	Non
aPKC sib	h3c1	52.255	391.662	80.187	Non
aPKC sib	h3c1	52.255	507.624	80.187	Non
aPKC sib	h3c1	52.255	507.624	80.187	Non
aPKC sib	h3c1	52.316	643.627	80.272	Non
aPKC sib	h3c1	51.408	779.394	78.879	Non
aPKC sib	h3c2	55.101	356.548	84.552	Non
aPKC sib	h3c2	55.101	448.807	84.552	Non
aPKC sib	h3c2	55.101	568.34	84.552	Non
aPKC sib	h3c2	55.041	643.683	84.465	Non
aPKC sib	h3c2	53.89	599.129	82.683	Non
aPKC sib	h3c3	57.281	262.708	87.891	Non
aPKC sib	h3c3	57.281	430.684	87.891	Non
aPKC sib	h3c3	57.947	575.656	88.931	Non
aPKC sib	h3c3	57.947	775.485	88.931	Non
aPKC sib	h3c3	57.705	782.539	88.539	Non
aPKC sib	h3c3	57.705	902.126	88.539	Non
aPKC sib	h3c4	58.31	206.611	89.471	Non
aPKC sib	h3c4	58.31	335.554	89.471	Non
aPKC sib	h3c4	58.31	448.022	89.471	Non
aPKC sib	h3c4	58.31	530.993	89.471	Non
aPKC sib	h3c4	57.705	667.212	88.56	Non
aPKC sib	h3c4	57.705	667.212	88.56	Non
aPKC sib	h3c4	57.705	783.16	88.56	Non
aPKC sib	h3c5	46.019	1274.844	70.587	Non
aPKC sib	h3c5	50.923	1037.258	78.129	Non
aPKC sib	h3c5	50.923	1037.258	78.129	Non
aPKC sib	h3c5	50.257	848.767	77.11	Non
aPKC sib	h3c5	50.257	743.022	77.11	Non
aPKC sib	h3c5	50.742	634.258	77.848	Non
aPKC sib	h4c1	47.351	413.534	72.639	Non
aPKC sib	h4c1	47.653	500.38	73.121	Non
aPKC sib	h4c1	47.653	529.181	73.121	Non
aPKC sib	h4c1	47.653	561.145	73.121	Non
aPKC sib	h4c1	47.532	685.336	72.921	Non
aPKC sib	h4c1	47.532	706.082	72.947	Non
aPKC sib	h4c1	47.108	899.371	72.284	Non
aPKC sib	h4c1	48.32	951.545	74.126	Non
aPKC sib	h4c1	48.864	985.877	74.975	Non
aPKC sib	h4c1	48.864	933.863	74.968	Non
aPKC sib	h4c1	48.804	812.671	74.882	Non
aPKC sib	h4c2	54.556	423.403	83.712	Non
aPKC sib	h4c2	54.556	496.63	83.712	Non
aPKC sib	h4c2	54.556	514.843	83.712	Non
aPKC sib	h4c2	54.556	543.872	83.712	Non
aPKC sib	h4c2	54.435	587.141	83.533	Non
aPKC sib	h4c2	54.435	599.319	83.533	Non
aPKC sib	h4c2	54.435	599.319	83.533	Non
aPKC sib	h4c2	54.859	664.612	84.177	Non
aPKC sib	h4c2	55.222	702.119	84.742	Non
aPKC sib	h4c2	55.041	728.204	84.457	Non
aPKC sib	h4c3	51.408	256.239	78.866	Non
aPKC sib	h4c3	51.408	361.272	78.866	Non
aPKC sib	h4c3	51.408	363.194	78.866	Non
aPKC sib	h4c3	51.408	397.532	78.866	Non
aPKC sib	h4c3	51.468	512.21	78.951	Non
aPKC sib	h4c3	51.468	545.41	78.951	Non
aPKC sib	h4c3	51.468	545.41	78.951	Non
aPKC sib	h4c3	52.013	638.324	79.803	Non
aPKC sib	h4c3	52.134	702.719	79.991	Non
aPKC sib	h4c3	52.134	658.724	79.991	Non
aPKC sib	h4c4	59.219	194.113	90.877	Non
aPKC sib	h4c4	59.037	323.772	90.591	Non
aPKC sib	h4c4	59.037	338.465	90.591	Non
aPKC sib	h4c4	58.008	404.545	89.007	Non
aPKC sib	h4c4	58.008	464.271	89.007	Non
aPKC sib	h4c4	59.098	545.372	90.688	Non
aPKC sib	h4c4	61.641	589.899	94.606	Non
aPKC sib	h4c4	61.52	637.702	94.404	Non
aPKC sib	h4c4	61.52	597.817	94.404	Non
aPKC sib	h5c1	43.778	312.674	67.149	Non
aPKC sib	h5c1	43.536	380.052	66.772	Non
aPKC sib	h5c1	42.749	438.222	65.572	Non
aPKC sib	h5c1	42.628	479.279	65.385	Non
aPKC sib	h5c1	42.628	502.324	65.385	Non
aPKC sib	h5c1	42.143	659.125	64.645	Non
aPKC sib	h5c1	42.143	734.095	64.651	Non
aPKC sib	h5c1	42.143	768.97	64.659	Non
aPKC sib	h5c2	49.47	348.576	75.898	Non
aPKC sib	h5c2	49.47	439.438	75.898	Non
aPKC sib	h5c2	49.47	492.559	75.898	Non
aPKC sib	h5c2	49.47	525.254	75.898	Non
aPKC sib	h5c2	49.47	554.396	75.898	Non
aPKC sib	h5c2	49.773	580.248	76.363	Non
aPKC sib	h5c2	49.773	598.46	76.363	Non
aPKC sib	h5c2	49.773	646.46	76.363	Non
aPKC sib	h5c3	48.562	403.375	74.5	Non
aPKC sib	h5c3	48.562	450.048	74.5	Non
aPKC sib	h5c3	48.562	482.547	74.5	Non
aPKC sib	h5c3	48.562	518.128	74.5	Non
aPKC sib	h5c3	48.683	632.03	74.687	Non
aPKC sib	h5c3	48.683	738.697	74.687	Non
aPKC sib	h5c3	48.743	815.81	74.775	Non
aPKC sib	h5c3	48.804	853.58	74.874	Non
aPKC sib	h5c4	53.951	265.765	82.79	Non
aPKC sib	h5c4	53.951	410.39	82.79	Non
aPKC sib	h5c4	53.951	466.302	82.79	Non
aPKC sib	h5c4	53.89	540.295	82.673	Non
aPKC sib	h5c4	53.951	586.768	82.776	Non
aPKC sib	h5c4	53.951	642.385	82.776	Non
aPKC sib	h5c4	51.892	856.889	79.614	Non
aPKC sib	h5c4	53.042	769.044	81.379	Non
aPKC sib	h5c4	50.742	814.797	77.85	Non
aPKC sib	h6c1	49.47	436.297	75.9	Non
aPKC sib	h6c1	50.62	507.226	77.669	Non
aPKC sib	h6c1	51.165	523.275	78.494	Non
aPKC sib	h6c1	51.165	568.355	78.494	Non
aPKC sib	h6c1	51.831	587.814	79.53	Non
aPKC sib	h6c1	51.831	630.657	79.53	Non
aPKC sib	h6c1	51.831	710.871	79.53	Non
aPKC sib	h6c1	51.831	741.333	79.53	Non
aPKC sib	h6c1	52.013	758.508	79.799	Non
aPKC sib	h6c2	52.437	370.207	80.454	Non
aPKC sib	h6c2	52.437	420.273	80.454	Non
aPKC sib	h6c2	52.376	533.137	80.346	Non
aPKC sib	h6c2	52.376	586.002	80.346	Non
aPKC sib	h6c2	52.376	672.818	80.346	Non
aPKC sib	h6c2	52.376	757.501	80.346	Non
aPKC sib	h6c2	52.376	745.355	80.346	Non
aPKC sib	h6c3	51.771	533.39	79.428	Non
aPKC sib	h6c3	51.771	566.497	79.428	Non
aPKC sib	h6c3	51.771	630.743	79.428	Non
aPKC sib	h6c3	52.134	710.361	79.987	Non
aPKC sib	h6c3	52.498	832.403	80.546	Non
aPKC sib	h6c3	52.558	925.862	80.636	Non
aPKC sib	h6c3	52.558	969.385	80.636	Non
aPKC sib	h6c3	52.558	915.894	80.636	Non
aPKC sib	h6c4	51.65	347.285	79.242	Non
aPKC sib	h6c4	51.65	416.641	79.242	Non
aPKC sib	h6c4	51.408	453.199	78.895	Non
aPKC sib	h6c4	51.347	530.691	78.786	Non
aPKC sib	h6c4	49.954	621.685	76.637	Non
aPKC sib	h6c4	49.954	694.807	76.637	Non
aPKC sib	h6c4	46.2	857.916	70.884	Non
aPKC sib	h6c4	44.081	817.462	67.619	Non
aPKC sib	h7c1	50.197	274.965	77.015	Non
aPKC sib	h7c1	50.257	351.728	77.095	Non
aPKC sib	h7c1	49.712	407.182	76.26	Non
aPKC sib	h7c1	49.712	487.613	76.26	Non
aPKC sib	h7c1	49.167	552.893	75.433	Non
aPKC sib	h7c1	49.349	548.065	75.71	Non
aPKC sib	h7c1	49.349	585.551	75.71	Non
aPKC sib	h7c1	48.198	605.951	73.95	Non
aPKC sib	h7c1	47.169	600.567	72.363	Non
aPKC sib	h7c1	45.595	595.122	69.942	Non
aPKC sib	h7c1	44.263	601.902	67.903	Non
aPKC sib	h7c2	57.342	253.556	88.004	Non
aPKC sib	h7c2	56.009	324.704	85.938	Non
aPKC sib	h7c2	56.009	356.484	85.938	Non
aPKC sib	h7c2	55.041	450.215	84.45	Non
aPKC sib	h7c2	54.617	599.684	83.812	Non
aPKC sib	h7c2	52.921	670.293	81.196	Non
aPKC sib	h7c2	52.982	726.149	81.293	Non
aPKC sib	h7c2	52.8	766.023	81.027	Non
aPKC sib	h7c2	53.042	726.825	81.39	Non
aPKC sib	h7c2	46.564	714.462	71.442	Non
aPKC sib	h7c2	48.743	723.606	74.794	Non
aPKC sib	h8c4	50.863	481.271	78.033	Non
aPKC sib	h8c4	50.863	496.732	78.033	Non
aPKC sib	h8c4	50.197	542.506	77.026	Non
aPKC sib	h8c4	50.197	547.056	77.026	Non
aPKC sib	h8c4	49.591	533.727	76.08	Non
aPKC sib	h8c4	49.591	512.808	76.087	Non
aPKC sib	h8c4	50.197	543.313	77.021	Non
aPKC sib	h8c4	50.197	571.778	77.021	Non
aPKC sib	h8c4	50.197	566.476	77.021	Non
aPKC sib	h8c4	52.498	564.62	80.559	Non
aPKC sib	h8c4	52.498	523.954	80.559	Non
aPKC sib	h9c1	43.657	202.214	66.979	Non
aPKC sib	h9c1	43.657	271.995	66.979	Non
aPKC sib	h9c1	42.749	397.347	65.577	Non
aPKC sib	h9c1	43.294	483.98	66.408	Non
aPKC sib	h9c1	43.294	556.155	66.408	Non
aPKC sib	h9c1	43.294	620.185	66.408	Non
aPKC sib	h9c1	43.294	670.727	66.408	Non
aPKC sib	h9c1	46.079	787.475	70.698	Non
aPKC sib	h9c1	46.079	787.475	70.698	Non
aPKC sib	h9c1	46.079	879.136	70.698	Non
aPKC sib	h9c2	51.165	253.911	78.499	Non
aPKC sib	h9c2	51.165	359.997	78.499	Non
aPKC sib	h9c2	51.165	453.715	78.499	Non
aPKC sib	h9c2	51.165	522.527	78.499	Non
aPKC sib	h9c2	50.802	644.641	77.941	Non
aPKC sib	h9c2	50.802	706.054	77.941	Non
aPKC sib	h9c2	50.802	785.589	77.941	Non
aPKC sib	h9c2	49.228	1078.919	75.542	Non
aPKC sib	h9c2	49.228	1054.983	75.542	Non
aPKC sib	h9c2	49.228	975.726	75.542	Non
aPKC sib	h9c3	45.171	275.999	69.313	Non
aPKC sib	h9c3	45.171	392.48	69.313	Non
aPKC sib	h9c3	45.171	512.681	69.313	Non
aPKC sib	h9c3	45.171	584.784	69.313	Non
aPKC sib	h9c3	45.171	625.981	69.313	Non
aPKC sib	h9c3	45.353	830.713	69.575	Non
aPKC sib	h9c3	45.353	907.573	69.575	Non
aPKC sib	h9c3	45.353	1015.93	69.575	Non
aPKC sib	h9c3	44.808	1142.812	68.729	Non
aPKC sib	h9c3	44.808	1088.377	68.729	Non
aPKC sib	h9c4	56.615	387.684	86.88	Non
aPKC sib	h9c4	56.615	495.967	86.88	Non
aPKC sib	h9c4	56.615	552.148	86.88	Non
aPKC sib	h9c4	56.615	591.246	86.88	Non
aPKC sib	h9c4	57.342	665.771	88	Non
aPKC sib	h9c4	57.342	720.612	88	Non
aPKC sib	h9c4	57.342	790.33	88	Non
aPKC sib	h9c4	57.342	856.752	88	Non
aPKC sib	h9c4	56.736	873.022	87.061	Non
aPKC sib	h9c4	56.736	893.607	87.061	Non
aPKC sib	h10c1	61.277	263.856	94.028	Non
aPKC sib	h10c1	61.277	369.092	94.028	Non
aPKC sib	h10c1	60.975	478.022	93.556	Non
aPKC sib	h10c1	60.975	541.297	93.556	Non
aPKC sib	h10c1	60.975	621.938	93.556	Non
aPKC sib	h10c1	60.975	655.815	93.556	Non
aPKC sib	h10c1	61.217	896.099	93.955	Non
aPKC sib	h10c1	61.217	968.26	93.955	Non
aPKC sib	h10c1	58.674	944.834	90.037	Non
aPKC sib	h10c1	58.674	870.994	90.037	Non
aPKC sib	h10c2	65.032	400.299	99.788	Non
aPKC sib	h10c2	65.032	506	99.788	Non
aPKC sib	h10c2	65.032	548.102	99.788	Non
aPKC sib	h10c2	65.032	574.705	99.788	Non
aPKC sib	h10c2	65.698	682.207	100.843	Non
aPKC sib	h10c2	65.698	719.624	100.843	Non
aPKC sib	h10c2	62.428	894.94	95.798	Non
aPKC sib	h10c2	62.428	919.228	95.798	Non
aPKC sib	h10c3	53.951	331.447	82.776	Non
aPKC sib	h10c3	53.951	417.703	82.776	Non
aPKC sib	h10c3	53.951	465.682	82.776	Non
aPKC sib	h10c3	53.406	577.433	81.969	Non
aPKC sib	h10c3	53.406	672.968	81.969	Non
aPKC sib	h10c3	53.406	758.899	81.969	Non
aPKC sib	h10c3	53.406	765.44	81.969	Non
aPKC sib	h10c3	53.406	756.641	81.969	Non
aPKC sib	h10c3	52.921	683.49	81.208	Non
aPKC sib	h10c4	67.272	303.868	103.229	Non
aPKC sib	h10c4	67.272	385.918	103.229	Non
aPKC sib	h10c4	67.514	445.539	103.611	Non
aPKC sib	h10c4	67.756	525.634	103.988	Non
aPKC sib	h10c4	67.272	651.972	103.26	Non
aPKC sib	h10c4	67.272	716.967	103.26	Non
aPKC sib	h10c4	67.272	746.731	103.26	Non
aPKC sib	h10c4	67.211	799.878	103.141	Non
aPKC sib	h10c4	67.211	812.292	103.141	Non
aPKC sib	h11c1	56.312	375.283	86.41	Non
aPKC sib	h11c1	56.312	501.262	86.41	Non
aPKC sib	h11c1	56.312	542.67	86.41	Non
aPKC sib	h11c1	56.312	552.414	86.41	Non
aPKC sib	h11c1	56.373	710.743	86.518	Non
aPKC sib	h11c1	56.373	752.165	86.518	Non
aPKC sib	h11c1	56.191	832.355	86.225	Non
aPKC sib	h11c1	56.191	798.858	86.225	Non
aPKC sib	h11c2	50.923	501.776	78.146	Non
aPKC sib	h11c2	50.923	604.806	78.146	Non
aPKC sib	h11c2	51.347	747.765	78.771	Non
aPKC sib	h11c2	51.347	842.579	78.771	Non
aPKC sib	h11c2	51.347	916.424	78.771	Non
aPKC sib	h11c2	51.347	975.419	78.771	Non
aPKC sib	h11c2	51.347	990.082	78.771	Non
aPKC sib	h11c2	51.347	967.505	78.771	Non
aPKC sib	h11c3	45.716	461.92	70.12	Non
aPKC sib	h11c3	46.14	492.47	70.773	Non
aPKC sib	h11c3	46.14	495.349	70.773	Non
aPKC sib	h11c3	45.776	633.266	70.229	Non
aPKC sib	h11c3	45.776	678.565	70.229	Non
aPKC sib	h11c3	45.776	698.086	70.229	Non
aPKC sib	h11c3	45.595	815.888	69.938	Non
aPKC sib	h11c3	45.595	796.735	69.938	Non
aPKC sib	h11c4	52.619	478.999	80.737	Non
aPKC sib	h11c4	52.619	531.929	80.737	Non
aPKC sib	h11c4	52.619	528.206	80.737	Non
aPKC sib	h11c4	52.8	606.168	81.024	Non
aPKC sib	h11c4	52.8	652.708	81.024	Non
aPKC sib	h11c4	52.8	688.166	81.024	Non
aPKC sib	h11c4	51.529	736.833	79.07	Non
aPKC sib	h11c4	51.529	764.574	79.07	Non
aPKC sib	h11c4	48.925	752.61	75.067	Non
aPKC sib	h11c4	48.925	731.095	75.067	Non
aPKC sib	h11c4	46.624	813.164	71.533	Non
aPKC sib	h11c4	46.624	784.294	71.533	Non
aPKC sib	h12c1	65.94	372.979	101.206	Non
aPKC sib	h12c1	65.94	437.168	101.206	Non
aPKC sib	h12c1	65.94	478.261	101.206	Non
aPKC sib	h12c1	65.94	530.698	101.206	Non
aPKC sib	h12c1	65.94	600.889	101.206	Non
aPKC sib	h12c1	65.516	797.692	100.556	Non
aPKC sib	h12c1	65.516	831.278	100.556	Non
aPKC sib	h12c1	65.516	808.878	100.556	Non
aPKC sib	h12c1	65.516	753.395	100.556	Non
aPKC sib	h12c2	56.312	450.435	86.408	Non
aPKC sib	h12c2	56.312	600.759	86.408	Non
aPKC sib	h12c2	56.312	662.883	86.408	Non
aPKC sib	h12c2	56.191	762.675	86.223	Non
aPKC sib	h12c2	56.191	778.063	86.223	Non
aPKC sib	h12c2	56.191	763.826	86.223	Non
aPKC sib	h12c2	56.191	774.676	86.223	Non
aPKC sib	h12c2	56.191	757.939	86.223	Non
aPKC sib	h12c2	57.402	897.058	88.069	Non
aPKC sib	h12c2	57.402	883.183	88.069	Non
aPKC sib	h12c3	45.05	460.363	69.128	Non
aPKC sib	h12c3	45.05	526.076	69.128	Non
aPKC sib	h12c3	45.05	584.12	69.128	Non
aPKC sib	h12c3	45.474	698.794	69.758	Non
aPKC sib	h12c3	45.474	748.673	69.758	Non
aPKC sib	h12c3	45.474	768.262	69.758	Non
aPKC sib	h12c3	45.474	753.931	69.758	Non
aPKC sib	h12c3	45.474	691.266	69.758	Non
aPKC sib	h12c4	53.89	422.829	82.699	Non
aPKC sib	h12c4	53.89	545.38	82.699	Non
aPKC sib	h12c4	53.89	686.562	82.699	Non
aPKC sib	h12c4	53.89	753.539	82.699	Non
aPKC sib	h12c4	53.89	810.873	82.699	Non
aPKC sib	h12c4	53.89	845.675	82.699	Non
aPKC sib	h12c4	53.89	895.022	82.699	Non
aPKC sib	h12c4	53.587	1040.421	82.226	Non
aPKC sib	h12c4	53.587	999.389	82.226	Non
aPKC sib	h12c4	53.587	908.942	82.226	Non
aPKC sib	h12c4	53.587	783.993	82.226	Non
aPKC sib	h12c5	48.441	428.373	74.311	Non
aPKC sib	h12c5	48.441	574.515	74.311	Non
aPKC sib	h12c5	48.441	651.754	74.311	Non
aPKC sib	h12c5	48.441	694.115	74.311	Non
aPKC sib	h12c5	48.441	728.846	74.311	Non
aPKC sib	h12c5	48.38	754.255	74.217	Non
aPKC sib	h12c5	48.38	809.806	74.217	Non
aPKC sib	h12c5	48.38	854.18	74.217	Non
aPKC sib	h12c5	48.38	861.004	74.217	Non
aPKC sib	h13c1	64.91	298.388	99.623	Non
aPKC sib	h13c1	64.91	360.229	99.623	Non
aPKC sib	h13c1	64.91	390.633	99.623	Non
aPKC sib	h13c1	64.91	401.227	99.623	Non
aPKC sib	h13c1	64.85	599.389	99.537	Non
aPKC sib	h13c1	64.85	642.742	99.537	Non
aPKC sib	h13c1	64.85	648.092	99.537	Non
aPKC sib	h13c1	64.426	759.763	98.885	Non
aPKC sib	h13c1	64.426	773.463	98.885	Non
aPKC sib	h13c1	64.426	792.369	98.885	Non
aPKC sib	h13c1	64.426	791.32	98.885	Non
aPKC sib	h13c1	64.426	791.571	98.885	Non
aPKC sib	h13c1	64.426	782.172	98.885	Non
aPKC sib	h13c2	62.307	346.23	95.644	Non
aPKC sib	h13c2	62.307	448.399	95.644	Non
aPKC sib	h13c2	62.307	506.917	95.644	Non
aPKC sib	h13c2	62.307	571.351	95.644	Non
aPKC sib	h13c2	61.52	746.593	94.401	Non
aPKC sib	h13c2	61.52	782.269	94.401	Non
aPKC sib	h13c2	61.52	827.478	94.401	Non
aPKC sib	h13c2	61.52	855.714	94.401	Non
aPKC sib	h13c2	61.52	877.964	94.401	Non
aPKC sib	h13c3	61.217	369.129	93.962	Non
aPKC sib	h13c3	61.217	425.906	93.962	Non
aPKC sib	h13c3	61.217	457.766	93.962	Non
aPKC sib	h13c3	61.217	452.884	93.962	Non
aPKC sib	h13c3	61.217	463.986	93.962	Non
aPKC sib	h13c3	61.217	498.662	93.962	Non
aPKC sib	h13c3	62.307	666.309	95.625	Non
aPKC sib	h13c3	62.307	691.615	95.625	Non
aPKC sib	h13c3	62.307	707.766	95.625	Non
aPKC sib	h13c3	62.307	723.215	95.625	Non
aPKC sib	h13c3	55.888	916.857	85.762	Non
aPKC sib	h13c3	55.888	894.238	85.762	Non
aPKC sib	h13c3	55.888	812.643	85.762	Non
aPKC sib	h13c3	55.888	736.221	85.762	Non
aPKC sib	h14c1	42.991	284.041	65.941	Non
aPKC sib	h14c1	43.475	450.554	66.68	Non
aPKC sib	h14c1	43.475	477.366	66.68	Non
aPKC sib	h14c1	43.475	564.203	66.68	Non
aPKC sib	h14c1	43.475	573.708	66.68	Non
aPKC sib	h14c1	45.292	721.525	69.457	Non
aPKC sib	h14c1	44.929	807.194	68.923	Non
aPKC sib	h14c1	45.05	880.292	69.11	Non
aPKC sib	h14c1	45.05	896.957	69.11	Non
aPKC sib	h14c1	44.929	948.372	68.922	Non
aPKC sib	h14c1	44.929	927.145	68.922	Non
aPKC sib	h14c1	44.929	871.407	68.922	Non
aPKC sib	h14c2	52.376	220.573	80.356	Non
aPKC sib	h14c2	52.376	304.936	80.356	Non
aPKC sib	h14c2	52.376	448.057	80.356	Non
aPKC sib	h14c2	52.376	454.56	80.356	Non
aPKC sib	h14c2	53.285	514.896	81.773	Non
aPKC sib	h14c2	53.285	547.292	81.773	Non
aPKC sib	h14c2	53.285	570.416	81.773	Non
aPKC sib	h14c2	53.285	655.226	81.773	Non
aPKC sib	h14c2	51.831	875.339	79.537	Non
aPKC sib	h14c2	51.831	901.502	79.537	Non
aPKC sib	h14c2	51.831	893.088	79.537	Non
aPKC sib	h14c2	51.044	772.186	78.322	Non
aPKC sib	h14c3	45.595	255.781	69.944	Non
aPKC sib	h14c3	45.595	355.463	69.944	Non
aPKC sib	h14c3	45.595	372.052	69.944	Non
aPKC sib	h14c3	45.595	440.043	69.944	Non
aPKC sib	h14c3	45.595	519.054	69.944	Non
aPKC sib	h14c3	45.534	601.686	69.859	Non
aPKC sib	h14c3	45.534	688.652	69.859	Non
aPKC sib	h14c3	48.501	679.974	74.421	Non
aPKC sib	h14c3	48.501	712.489	74.421	Non
aPKC sib	h14c3	45.655	706.983	70.047	Non
aPKC sib	h14c3	45.655	682.406	70.047	Non
aPKC sib	h14c4	47.23	287.38	72.459	Non
aPKC sib	h14c4	47.23	384.836	72.459	Non
aPKC sib	h14c4	47.23	394.362	72.459	Non
aPKC sib	h14c4	47.23	432.733	72.459	Non
aPKC sib	h14c4	47.956	533.629	73.582	Non
aPKC sib	h14c4	49.046	609.196	75.245	Non
aPKC sib	h14c4	49.046	700.729	75.245	Non
aPKC sib	h14c4	47.593	818.357	73.017	Non
aPKC sib	h14c4	47.593	804.337	73.017	Non
aPKC sib	h14c4	47.593	746.127	73.017	Non
aPKC sib	h14c4	41.962	702.228	64.362	Non
aPKC sib	h14c4	41.962	757.227	64.362	Non
aPKC sib	h15c1	44.868	296.097	68.83	Non
aPKC sib	h15c1	44.868	339.987	68.83	Non
aPKC sib	h15c1	44.384	494.459	68.082	Non
aPKC sib	h15c1	44.384	506.901	68.082	Non
aPKC sib	h15c1	44.384	572.522	68.082	Non
aPKC sib	h15c1	43.415	762.793	66.6	Non
aPKC sib	h15c1	43.415	807.408	66.6	Non
aPKC sib	h15c1	43.415	856.108	66.6	Non
aPKC sib	h15c1	43.415	884.592	66.6	Non
aPKC sib	h15c1	45.595	925.065	69.96	Non
aPKC sib	h15c1	45.595	888.572	69.96	Non
aPKC sib	h15c1	45.595	829.796	69.96	Non
aPKC sib	h15c1	46.321	738.754	71.072	Non
aPKC sib	h15c2	37.118	427.628	56.922	Non
aPKC sib	h15c2	37.118	479.842	56.922	Non
aPKC sib	h15c2	37.118	579.249	56.922	Non
aPKC sib	h15c2	37.118	631.35	56.922	Non
aPKC sib	h15c2	39.116	699.808	59.998	Non
aPKC sib	h15c2	39.116	796.571	59.998	Non
aPKC sib	h15c2	39.116	875.025	59.998	Non
aPKC sib	h15c2	39.116	947.214	59.998	Non
aPKC sib	h15c2	39.116	949.229	59.998	Non
aPKC sib	h15c2	39.116	969.831	59.998	Non
aPKC sib	h15c2	39.116	946.761	59.998	Non
aPKC sib	h15c2	36.088	1040.962	55.358	Non
aPKC sib	h15c2	36.088	1052.872	55.358	Non
aPKC sib	h15c2	36.088	1033.256	55.358	Non
aPKC sib	h15c2	32.031	1049.37	49.114	Non
aPKC sib	h15c2	32.031	1035.297	49.114	Non
aPKC sib	h15c3	50.742	323.338	77.851	Non
aPKC sib	h15c3	50.742	382.255	77.851	Non
aPKC sib	h15c3	50.742	498.349	77.851	Non
aPKC sib	h15c3	50.742	579.251	77.851	Non
aPKC sib	h15c3	50.681	703.15	77.749	Non
aPKC sib	h15c3	50.681	770.314	77.749	Non
aPKC sib	h15c3	50.136	921.2	76.915	Non
aPKC sib	h15c3	50.136	979.551	76.915	Non
aPKC sib	h15c3	50.136	953.352	76.915	Non
aPKC sib	h15c3	50.136	888.572	76.915	Non
aPKC sib	h15c3	48.198	994.274	73.948	Non
aPKC sib	h15c3	48.198	977.431	73.948	Non
aPKC sib	h15c3	48.198	982.008	73.948	Non
aPKC sib	h15c3	44.565	953.557	68.359	Non
aPKC sib	h15c3	44.565	973.939	68.359	Non
aPKC sib	h15c4	56.312	329.155	86.397	Non
aPKC sib	h15c4	58.31	316.045	89.481	Non
aPKC sib	h15c4	58.31	394.137	89.481	Non
aPKC sib	h15c4	58.31	461.19	89.481	Non
aPKC sib	h15c4	58.31	498.215	89.481	Non
aPKC sib	h15c4	56.131	716.696	86.127	Non
aPKC sib	h15c4	56.131	777.016	86.127	Non
aPKC sib	h15c4	56.131	807.344	86.127	Non
aPKC sib	h15c4	56.131	807.517	86.127	Non
aPKC sib	h15c4	56.131	820.512	86.127	Non
aPKC sib	h15c4	58.25	883.493	89.378	Non
aPKC sib	h15c4	58.25	932.033	89.378	Non
aPKC sib	h15c4	58.613	1013.959	89.95	Non
aPKC sib	h15c4	58.613	981.968	89.95	Non
aPKC sib	h15c4	58.674	925.923	90.048	Non
aPKC sib	h15c4	58.674	904.322	90.048	Non
aPKC sib	h15c4	58.674	835.417	90.048	Non
aPKC sib	h15c5	41.962	439.434	64.377	Non
aPKC sib	h15c5	41.962	528.464	64.377	Non
aPKC sib	h15c5	41.962	620.106	64.377	Non
aPKC sib	h15c5	41.962	715.111	64.377	Non
aPKC sib	h15c5	41.962	780.765	64.377	Non
aPKC sib	h15c5	41.962	844.727	64.377	Non
aPKC sib	h15c5	41.962	925.097	64.377	Non
aPKC sib	h15c5	41.962	970.915	64.377	Non
aPKC sib	h15c5	40.751	1035.999	62.495	Non
aPKC sib	h15c5	40.751	990.323	62.495	Non
aPKC sib	h15c5	40.751	988.103	62.495	Non
aPKC sib	h15c5	40.751	903.331	62.495	Non
aPKC sib	h15c5	40.751	903.331	62.495	Non
aPKC sib	h15c5	37.299	1063.645	57.218	Non
aPKC sib	h15c5	37.299	1077.93	57.218	Non
aPKC sib	h16c1	48.38	305.808	74.225	Non
aPKC sib	h16c1	48.38	404.294	74.225	Non
aPKC sib	h16c1	48.38	508.337	74.225	Non
aPKC sib	h16c1	48.38	561.02	74.225	Non
aPKC sib	h16c1	48.38	605.918	74.225	Non
aPKC sib	h16c1	48.38	603.072	74.225	Non
aPKC sib	h16c1	48.501	696.401	74.407	Non
aPKC sib	h16c1	48.501	720.113	74.407	Non
aPKC sib	h16c1	48.501	741.395	74.407	Non
aPKC sib	h16c1	48.501	756.206	74.407	Non
aPKC sib	h16c1	48.501	761.461	74.407	Non
aPKC sib	h16c1	48.501	724.332	74.407	Non
aPKC sib	h16c1	46.14	761.334	70.796	Non
aPKC sib	h16c1	45.171	733.396	69.298	Non
aPKC sib	h16c1	42.083	729.525	64.553	Non
aPKC sib	h16c2	47.775	391.064	73.288	Non
aPKC sib	h16c2	47.775	499.769	73.288	Non
aPKC sib	h16c2	47.775	575.051	73.288	Non
aPKC sib	h16c2	47.775	666.537	73.288	Non
aPKC sib	h16c2	47.775	774.666	73.288	Non
aPKC sib	h16c2	47.775	859.841	73.288	Non
aPKC sib	h16c2	47.775	932.585	73.288	Non
aPKC sib	h16c2	47.775	971.25	73.288	Non
aPKC sib	h16c2	47.775	996.516	73.288	Non
aPKC sib	h16c2	47.775	1002.115	73.288	Non
aPKC sib	h16c2	46.442	999.499	71.246	Non
aPKC sib	h16c2	46.442	940.548	71.246	Non
aPKC sib	h16c3	44.929	430.957	68.923	Non
aPKC sib	h16c3	44.929	575.907	68.923	Non
aPKC sib	h16c3	44.929	728.303	68.923	Non
aPKC sib	h16c3	44.929	803.278	68.923	Non
aPKC sib	h16c3	44.929	867.232	68.923	Non
aPKC sib	h16c3	44.989	991.062	69.024	Non
aPKC sib	h16c3	44.989	1059.965	69.024	Non
aPKC sib	h16c3	44.989	1082.757	69.024	Non
aPKC sib	h16c3	44.989	1108.884	69.024	Non
aPKC sib	h16c3	44.989	1110.876	69.024	Non
aPKC sib	h16c3	44.989	1075.004	69.024	Non
aPKC sib	h16c3	44.686	1023.782	68.548	Non
aPKC sib	h16c3	44.686	987.477	68.548	Non
aPKC sib	h16c4	63.154	380.493	96.909	Non
aPKC sib	h16c4	63.154	480.319	96.909	Non
aPKC sib	h16c4	63.094	665.771	96.826	Non
aPKC sib	h16c4	63.094	695.821	96.826	Non
aPKC sib	h16c4	62.973	620.479	96.645	Non
aPKC sib	h16c4	62.973	653.698	96.645	Non
aPKC sib	h16c4	62.973	748.994	96.645	Non
aPKC sib	h16c4	62.186	946.327	95.447	Non
aPKC sib	h16c4	62.186	982.718	95.447	Non
aPKC sib	h16c4	62.186	963.808	95.447	Non
aPKC sib	h16c4	62.186	907.201	95.447	Non
aPKC sib	h16c4	62.186	896.472	95.447	Non
aPKC sib	h16c4	62.186	833.85	95.447	Non
aPKC sib	h16c4	62.186	777.547	95.447	Non
aPKC sib	h16c5	55.101	281.072	84.55	Non
aPKC sib	h16c5	55.101	343.342	84.55	Non
aPKC sib	h16c5	55.101	423.107	84.55	Non
aPKC sib	h16c5	55.101	504.068	84.55	Non
aPKC sib	h16c5	55.101	542.217	84.55	Non
aPKC sib	h16c5	55.888	597.935	85.751	Non
aPKC sib	h16c5	55.888	631.771	85.751	Non
aPKC sib	h16c5	55.888	636.539	85.751	Non
aPKC sib	h16c5	55.888	635.46	85.751	Non
aPKC sib	h16c5	55.888	594.059	85.751	Non
aPKC sib	h17c1	63.336	123.7	97.195	Non
aPKC sib	h17c1	63.336	159.285	97.195	Non
aPKC sib	h17c1	65.032	200.239	99.81	Non
aPKC sib	h17c1	65.032	215.684	99.81	Non
aPKC sib	h17c1	65.032	215.401	99.81	Non
aPKC sib	h17c1	65.032	216.189	99.81	Non
aPKC sib	h17c1	65.032	234.359	99.8	Non
aPKC sib	h17c1	64.971	277.964	99.709	Non
aPKC sib	h17c1	64.971	273.578	99.709	Non
aPKC sib	h17c1	64.971	263.881	99.709	Non
aPKC sib	h17c1	62.307	318.082	95.629	Non
aPKC sib	h17c1	62.307	313.836	95.629	Non
aPKC sib	h17c1	62.307	277.544	95.629	Non
aPKC sib	h17c1	62.307	244.014	95.629	Non
aPKC sib	h17c1	44.202	258.627	67.798	Non
aPKC sib	h17c2	46.503	133.937	71.338	Non
aPKC sib	h17c2	46.503	181.607	71.338	Non
aPKC sib	h17c2	46.261	240.014	70.966	Non
aPKC sib	h17c2	45.776	257.661	70.229	Non
aPKC sib	h17c2	45.776	234.079	70.229	Non
aPKC sib	h17c2	46.019	259.876	70.584	Non
aPKC sib	h17c2	43.112	293.822	66.125	Non
aPKC sib	h17c2	43.112	293.871	66.125	Non
aPKC sib	h17c2	43.112	277.111	66.125	Non
aPKC sib	h17c2	44.444	298.249	68.187	Non
aPKC sib	h17c2	44.444	294.356	68.187	Non
aPKC sib	h17c2	44.444	289.487	68.187	Non
aPKC sib	h17c2	44.747	361.664	68.641	Non
aPKC sib	h17c2	44.747	357.858	68.641	Non
aPKC sib	h17c2	44.747	349.893	68.641	Non
aPKC sib	h17c2	38.631	289.515	59.259	Non
aPKC sib	h17c2	38.631	267.042	59.259	Non
aPKC sib	h17c3	52.679	172.694	80.846	Non
aPKC sib	h17c3	52.679	215.794	80.846	Non
aPKC sib	h17c3	52.679	251.354	80.846	Non
aPKC sib	h17c3	52.498	268.767	80.557	Non
aPKC sib	h17c3	52.498	247.744	80.557	Non
aPKC sib	h17c3	52.498	243.346	80.557	Non
aPKC sib	h17c3	52.498	225.57	80.557	Non
aPKC sib	h17c3	52.013	224.703	79.802	Non
aPKC sib	h17c3	52.013	257.16	79.799	Non
aPKC sib	h17c3	52.013	247.735	79.799	Non
aPKC sib	h17c3	52.316	272.396	80.269	Non
aPKC sib	h17c3	52.316	278.853	80.269	Non
aPKC sib	h17c3	52.558	318.096	80.651	Non
aPKC sib	h17c3	52.558	297.241	80.651	Non
aPKC sib	h17c3	52.558	286.433	80.651	Non
aPKC sib	h17c3	52.558	273.692	80.651	Non
aPKC sib	h17c3	52.558	267.866	80.651	Non
aPKC sib	h17c3	52.558	258.599	80.651	Non
aPKC sib	h17c3	31.85	283.229	48.814	Non
aPKC sib	h17c4	38.752	142.623	59.434	Non
aPKC sib	h17c4	38.752	171.687	59.434	Non
aPKC sib	h17c4	38.752	177.384	59.434	Non
aPKC sib	h17c4	39.54	204.914	60.641	Non
aPKC sib	h17c4	39.54	199.302	60.641	Non
aPKC sib	h17c4	39.419	216.094	60.455	Non
aPKC sib	h17c4	39.419	212.418	60.455	Non
aPKC sib	h17c4	39.419	203.012	60.455	Non
aPKC sib	h17c4	39.782	284.077	61.025	Non
aPKC sib	h17c4	39.782	277.308	61.025	Non
aPKC sib	h17c4	39.782	258.204	61.025	Non
aPKC sib	h17c4	38.934	275.452	59.715	Non
aPKC sib	h17c4	38.934	253.587	59.715	Non
aPKC sib	h17c4	38.934	242.365	59.715	Non
aPKC sib	h17c4	38.934	239.737	59.715	Non
aPKC sib	h17c4	38.934	227.333	59.715	Non
aPKC sib	h17c4	38.934	206.194	59.715	Non
aPKC sib	h18c1	57.402	201.472	88.092	Non
aPKC sib	h18c1	57.402	303.243	88.092	Non
aPKC sib	h18c1	57.523	393.204	88.257	Non
aPKC sib	h18c1	57.523	442.22	88.257	Non
aPKC sib	h18c1	57.523	481.041	88.257	Non
aPKC sib	h18c1	57.523	528.5	88.257	Non
aPKC sib	h18c1	57.523	580.804	88.257	Non
aPKC sib	h18c1	58.371	696.28	89.566	Non
aPKC sib	h18c1	58.371	642.112	89.566	Non
aPKC sib	h18c2	52.558	156.872	80.633	Non
aPKC sib	h18c2	52.558	231.312	80.633	Non
aPKC sib	h18c2	52.558	309.553	80.633	Non
aPKC sib	h18c2	52.558	341.379	80.633	Non
aPKC sib	h18c2	52.558	360.541	80.633	Non
aPKC sib	h18c2	52.558	369.84	80.633	Non
aPKC sib	h18c2	51.589	476.342	79.144	Non
aPKC sib	h18c2	51.589	491.227	79.144	Non
aPKC sib	h18c2	51.589	471.685	79.144	Non
aPKC sib	h18c2	48.077	509.05	73.752	Non
aPKC sib	h18c2	48.077	495.421	73.752	Non
aPKC sib	h18c3	49.773	174.568	76.372	Non
aPKC sib	h18c3	49.773	247.423	76.372	Non
aPKC sib	h18c3	49.591	338.29	76.092	Non
aPKC sib	h18c3	49.652	360.404	76.165	Non
aPKC sib	h18c3	49.47	366.108	75.903	Non
aPKC sib	h18c3	49.47	345.334	75.903	Non
aPKC sib	h18c3	49.47	346.778	75.903	Non
aPKC sib	h18c3	48.198	486.84	73.946	Non
aPKC sib	h18c3	48.198	515.198	73.946	Non
aPKC sib	h18c3	48.198	506.156	73.946	Non
aPKC sib	h18c3	48.198	478.593	73.946	Non
aPKC sib	h18c4	51.953	222.322	79.718	Non
aPKC sib	h18c4	51.771	275.023	79.432	Non
aPKC sib	h18c4	51.771	287.571	79.432	Non
aPKC sib	h18c4	52.134	302.765	79.987	Non
aPKC sib	h18c4	52.013	319.832	79.802	Non
aPKC sib	h18c4	51.892	364.819	79.63	Non
aPKC sib	h18c4	49.47	401.032	75.902	Non
aPKC sib	h18c4	49.47	399.699	75.902	Non
aPKC sib	h18c4	54.253	473.406	83.249	Non
aPKC sib	h18c4	54.253	469.6	83.249	Non
aPKC sib	h18c4	54.253	421.763	83.249	Non
aPKC sib	h19c1	48.138	153.28	73.85	Non
aPKC sib	h19c1	48.138	184.669	73.85	Non
aPKC sib	h19c1	48.138	228.79	73.85	Non
aPKC sib	h19c1	48.138	251.536	73.85	Non
aPKC sib	h19c1	48.138	279.297	73.85	Non
aPKC sib	h19c1	48.138	292.041	73.85	Non
aPKC sib	h19c1	46.927	323.14	72.011	Non
aPKC sib	h19c1	46.927	322.11	72.011	Non
aPKC sib	h19c1	46.927	317.812	72.011	Non
aPKC sib	h19c1	48.743	359.444	74.784	Non
aPKC sib	h19c1	48.743	327.417	74.784	Non
aPKC sib	h19c1	48.743	285.974	74.784	Non
aPKC sib	h19c1	48.743	258.118	74.784	Non
aPKC sib	h19c1	42.022	269.725	64.46	Non
aPKC sib	h19c2	49.349	175.431	75.705	Non
aPKC sib	h19c2	49.349	221.798	75.705	Non
aPKC sib	h19c2	49.349	260.399	75.705	Non
aPKC sib	h19c2	49.349	296.162	75.705	Non
aPKC sib	h19c2	49.349	325.842	75.705	Non
aPKC sib	h19c2	49.288	354.003	75.621	Non
aPKC sib	h19c2	48.804	392.952	74.879	Non
aPKC sib	h19c2	48.804	391.792	74.879	Non
aPKC sib	h19c2	49.349	391.846	75.722	Non
aPKC sib	h19c2	49.349	374.097	75.722	Non
aPKC sib	h19c2	49.349	327.108	75.722	Non
aPKC sib	h19c3	49.349	198.748	75.722	Non
aPKC sib	h19c3	55.586	241.142	85.29	Non
aPKC sib	h19c3	55.586	271.666	85.29	Non
aPKC sib	h19c3	55.586	282.626	85.29	Non
aPKC sib	h19c3	55.767	287.281	85.576	Non
aPKC sib	h19c3	55.767	316.197	85.576	Non
aPKC sib	h19c3	55.767	364.391	85.576	Non
aPKC sib	h19c3	54.556	361.15	83.713	Non
aPKC sib	h19c3	54.556	369.144	83.713	Non
aPKC sib	h19c3	54.556	351.04	83.713	Non
aPKC sib	h19c3	54.556	313.361	83.713	Non
aPKC sib	h19c3	54.556	295.76	83.713	Non
aPKC sib	h19c3	42.87	160.333	65.764	Non
aPKC sib	h19c4	42.87	198.1	65.764	Non
aPKC sib	h19c4	44.565	234.137	68.369	Non
aPKC sib	h19c4	44.565	235.52	68.369	Non
aPKC sib	h19c4	44.565	229.624	68.369	Non
aPKC sib	h19c4	44.141	261.948	67.726	Non
aPKC sib	h19c4	44.141	253.81	67.726	Non
aPKC sib	h19c4	44.141	255.454	67.726	Non
aPKC sib	h19c4	44.141	242.328	67.726	Non
aPKC sib	h19c4	44.141	230.299	67.726	Non
aPKC sib	h19c4	44.141	224.201	67.726	Non
aPKC sib	h19c4	44.141	223.458	67.726	Non
aPKC sib	h19c4	41.114	246.025	63.062	Non
aPKC sib	h19c4	41.114	242.512	63.062	Non
aPKC sib	h19c4	41.114	238.352	63.062	Non
aPKC sib	h19c4	41.114	231.606	63.062	Non
aPKC sib	h19c4	41.114	224.387	63.062	Non
aPKC sib	h20c1	60.975	190.274	93.576	Non
aPKC sib	h20c1	61.338	296.324	94.146	Non
aPKC sib	h20c1	61.338	313.253	94.139	Non
aPKC sib	h20c1	61.096	345.732	93.768	Non
aPKC sib	h20c1	61.096	352.545	93.768	Non
aPKC sib	h20c1	61.277	403.529	94.039	Non
aPKC sib	h20c1	61.277	437.81	94.039	Non
aPKC sib	h20c1	61.277	439.107	94.039	Non
aPKC sib	h20c1	61.277	458.466	94.039	Non
aPKC sib	h20c1	61.277	456.135	94.039	Non
aPKC sib	h20c1	61.277	450.802	94.039	Non
aPKC sib	h20c1	61.277	435.611	94.039	Non
aPKC sib	h20c2	51.408	177.447	78.876	Non
aPKC sib	h20c2	51.408	205.544	78.876	Non
aPKC sib	h20c2	51.044	243.605	78.309	Non
aPKC sib	h20c2	51.044	260.091	78.309	Non
aPKC sib	h20c2	51.044	321.285	78.315	Non
aPKC sib	h20c2	51.044	306.489	78.315	Non
aPKC sib	h20c2	51.044	306.582	78.315	Non
aPKC sib	h20c2	50.742	359.051	77.858	Non
aPKC sib	h20c2	50.742	386.801	77.858	Non
aPKC sib	h20c2	50.742	429.385	77.858	Non
aPKC sib	h20c2	50.318	514.061	77.206	Non
aPKC sib	h20c2	50.318	538.239	77.206	Non
aPKC sib	h20c2	50.318	526.284	77.206	Non
aPKC sib	h20c2	50.318	520.919	77.206	Non
aPKC sib	h20c2	48.622	561.19	74.598	Non
aPKC sib	h20c2	48.622	506.9	74.598	Non
aPKC sib	h20c3	53.587	172.313	82.223	Non
aPKC sib	h20c3	53.587	219.364	82.223	Non
aPKC sib	h20c3	53.587	242.888	82.223	Non
aPKC sib	h20c3	53.587	242.946	82.223	Non
aPKC sib	h20c3	53.709	257.769	82.427	Non
aPKC sib	h20c3	53.709	258.984	82.427	Non
aPKC sib	h20c3	53.587	334.808	82.221	Non
aPKC sib	h20c3	53.587	343.407	82.221	Non
aPKC sib	h20c3	53.042	347.127	81.386	Non
aPKC sib	h20c3	53.042	348.824	81.386	Non
aPKC sib	h20c3	52.861	372.765	81.095	Non
aPKC sib	h20c3	52.861	378.17	81.095	Non
aPKC sib	h20c3	52.861	380.693	81.095	Non
aPKC sib	h20c3	52.861	389.177	81.095	Non
aPKC sib	h20c3	53.042	413.427	81.384	Non
aPKC sib	h20c3	53.042	426.073	81.384	Non
aPKC sib	h20c4	37.42	165.507	57.377	Non
aPKC sib	h20c4	37.42	219.102	57.377	Non
aPKC sib	h20c4	37.42	223.845	57.377	Non
aPKC sib	h20c4	37.239	306.531	57.113	Non
aPKC sib	h20c4	37.239	322.428	57.113	Non
aPKC sib	h20c4	37.239	337.578	57.113	Non
aPKC sib	h20c4	37.239	355.111	57.113	Non
aPKC sib	h20c4	37.299	367.856	57.196	Non
aPKC sib	h20c4	37.299	405.633	57.196	Non
aPKC sib	h20c4	37.299	415.54	57.196	Non
aPKC sib	h20c4	38.874	405.61	59.622	Non
aPKC sib	h20c4	38.874	438.364	59.622	Non
aPKC sib	h20c4	38.874	435.219	59.622	Non
aPKC sib	h20c4	38.874	431.535	59.622	Non
aPKC sib	h20c4	38.874	403.033	59.622	Non
aPKC sib	h20c4	38.874	378.775	59.622	Non
aPKC sib	h21c1	40.266	243.555	61.768	Non
aPKC sib	h21c1	40.266	292.279	61.768	Non
aPKC sib	h21c1	40.266	321.599	61.768	Non
aPKC sib	h21c1	40.266	334.756	61.768	Non
aPKC sib	h21c1	40.085	393.542	61.49	Non
aPKC sib	h21c1	40.085	435.963	61.49	Non
aPKC sib	h21c1	40.085	495.58	61.49	Non
aPKC sib	h21c1	40.085	511.571	61.49	Non
aPKC sib	h21c1	39.782	555.801	61.027	Non
aPKC sib	h21c1	39.782	542.484	61.027	Non
aPKC sib	h21c1	39.782	498.793	61.027	Non
aPKC sib	h21c1	39.782	450.065	61.027	Non
aPKC sib	h21c2	50.62	212.734	77.66	Non
aPKC sib	h21c2	50.62	272.549	77.66	Non
aPKC sib	h21c2	50.681	327.478	77.745	Non
aPKC sib	h21c2	50.56	381.821	77.578	Non
aPKC sib	h21c2	50.56	411.25	77.578	Non
aPKC sib	h21c2	50.863	484.353	78.042	Non
aPKC sib	h21c2	50.863	511.524	78.042	Non
aPKC sib	h21c2	50.863	513.135	78.042	Non
aPKC sib	h21c2	50.863	512.021	78.042	Non
aPKC sib	h21c2	51.286	541.813	78.697	Non
aPKC sib	h21c2	51.286	538.589	78.697	Non
aPKC sib	h21c2	51.286	514.212	78.697	Non
aPKC sib	h21c3	54.253	152.523	83.239	Non
aPKC sib	h21c3	54.253	223.118	83.239	Non
aPKC sib	h21c3	55.041	262.382	84.464	Non
aPKC sib	h21c3	55.041	283.313	84.464	Non
aPKC sib	h21c3	55.041	283.847	84.464	Non
aPKC sib	h21c3	55.041	313.22	84.462	Non
aPKC sib	h21c3	55.101	359.222	84.559	Non
aPKC sib	h21c3	55.101	385.93	84.559	Non
aPKC sib	h21c3	55.162	403.287	84.65	Non
aPKC sib	h21c3	55.041	423.835	84.466	Non
aPKC sib	h21c3	55.041	429.634	84.466	Non
aPKC sib	h21c3	55.041	436.287	84.466	Non
aPKC sib	h21c3	55.041	438.191	84.466	Non
aPKC sib	h21c3	55.041	414.886	84.466	Non
aPKC sib	h21c4	39.842	140.124	61.12	Non
aPKC sib	h21c4	39.842	212.112	61.12	Non
aPKC sib	h21c4	39.842	253.79	61.12	Non
aPKC sib	h21c4	39.842	280.532	61.12	Non
aPKC sib	h21c4	39.842	294.304	61.12	Non
aPKC sib	h21c4	41.235	332.525	63.241	Non
aPKC sib	h21c4	41.235	360.235	63.241	Non
aPKC sib	h21c4	41.235	371.837	63.241	Non
aPKC sib	h21c4	41.235	380.746	63.241	Non
aPKC sib	h21c4	41.235	386.155	63.241	Non
aPKC sib	h21c4	41.235	402.236	63.241	Non
aPKC sib	h21c4	41.235	438.702	63.241	Non
aPKC sib	h21c4	41.235	463.103	63.241	Non
aPKC sib	h21c4	41.235	464.692	63.241	Non
aPKC sib	h21c4	41.235	452.776	63.241	Non
aPKC sib	h21c4	38.208	441.42	58.594	Non
aPKC sib	h21c4	38.208	414.308	58.594	Non
aPKC sib	h21c5	48.259	164.564	74.03	Non
aPKC sib	h21c5	48.259	223.364	74.03	Non
aPKC sib	h21c5	48.138	293.743	73.861	Non
aPKC sib	h21c5	48.138	315.568	73.861	Non
aPKC sib	h21c5	48.138	348.564	73.861	Non
aPKC sib	h21c5	48.138	383.086	73.861	Non
aPKC sib	h21c5	48.138	423.049	73.861	Non
aPKC sib	h21c5	48.138	441.428	73.861	Non
aPKC sib	h21c5	48.259	476.822	74.047	Non
aPKC sib	h21c5	48.259	480.986	74.047	Non
aPKC sib	h21c5	48.259	460.034	74.047	Non
aPKC sib	h21c5	48.259	418.35	74.047	Non
aPKC sib	h22c1	46.321	185.241	71.066	Non
aPKC sib	h22c1	46.321	236.364	71.066	Non
aPKC sib	h22c1	46.321	332.51	71.066	Non
aPKC sib	h22c1	46.321	395.651	71.066	Non
aPKC sib	h22c1	47.169	466.2	72.351	Non
aPKC sib	h22c1	47.169	482.406	72.351	Non
aPKC sib	h22c1	47.169	551.949	72.363	Non
aPKC sib	h22c1	47.29	611.702	72.545	Non
aPKC sib	h22c1	47.29	641.704	72.545	Non
aPKC sib	h22c1	47.29	633.537	72.545	Non
aPKC sib	h22c1	47.29	651.054	72.549	Non
aPKC sib	h22c1	47.411	665.87	72.728	Non
aPKC sib	h22c1	47.411	623.361	72.728	Non
aPKC sib	h22c1	47.411	586.979	72.728	Non
aPKC sib	h22c2	39.903	236.656	61.204	Non
aPKC sib	h22c2	39.903	338.662	61.204	Non
aPKC sib	h22c2	39.903	396.371	61.204	Non
aPKC sib	h22c2	39.721	521.845	60.937	Non
aPKC sib	h22c2	39.721	537.649	60.937	Non
aPKC sib	h22c2	39.721	583.005	60.944	Non
aPKC sib	h22c2	39.721	593.278	60.944	Non
aPKC sib	h22c2	39.963	615.775	61.277	Non
aPKC sib	h22c2	39.963	590.2	61.277	Non
aPKC sib	h22c2	39.963	616.876	61.277	Non
aPKC sib	h22c2	39.54	718.547	60.647	Non
aPKC sib	h22c2	39.54	673.49	60.647	Non
aPKC sib	h22c2	39.54	637.269	60.647	Non
aPKC sib	h22c2	39.54	594.331	60.647	Non
aPKC sib	h22c2	40.085	557.64	61.483	Non
aPKC sib	h22c2	42.809	547.871	65.666	Non
aPKC sib	h22c2	42.809	524.256	65.666	Non
aPKC sib	h22c3	41.175	284.309	63.163	Non
aPKC sib	h22c3	41.175	357.367	63.163	Non
aPKC sib	h22c3	40.872	465.14	62.699	Non
aPKC sib	h22c3	40.872	485.253	62.699	Non
aPKC sib	h22c3	40.872	536.888	62.694	Non
aPKC sib	h22c3	40.872	554.594	62.694	Non
aPKC sib	h22c3	40.872	558.734	62.694	Non
aPKC sib	h22c3	41.175	521.589	63.16	Non
aPKC sib	h22c3	41.175	542.937	63.16	Non
aPKC sib	h22c3	41.175	551.277	63.16	Non
aPKC sib	h22c3	41.175	526.918	63.16	Non
aPKC sib	h22c3	43.354	516.683	66.505	Non
aPKC sib	h22c3	43.354	509.232	66.505	Non
aPKC sib	h22c4	54.072	241.537	82.958	Non
aPKC sib	h22c4	54.072	330.705	82.958	Non
aPKC sib	h22c4	54.132	412.414	83.052	Non
aPKC sib	h22c4	54.132	403.401	83.052	Non
aPKC sib	h22c4	54.738	409.208	84	Non
aPKC sib	h22c4	54.738	439.16	84	Non
aPKC sib	h22c4	55.101	490.808	84.542	Non
aPKC sib	h22c4	55.101	527.194	84.542	Non
aPKC sib	h22c4	55.101	549.972	84.542	Non
aPKC sib	h22c4	55.101	509.026	84.542	Non
aPKC sib	h22c4	55.101	442.579	84.542	Non
aPKC sib	h23c1	46.902	279.254	76.171	Non
aPKC sib	h23c1	46.902	327.425	76.171	Non
aPKC sib	h23c1	46.902	370.247	76.171	Non
aPKC sib	h23c1	47.874	470.1	77.786	Non
aPKC sib	h23c1	47.874	483.572	77.786	Non
aPKC sib	h23c1	47.874	444.368	77.786	Non
aPKC sib	h23c2	55.169	153.509	89.624	Non
aPKC sib	h23c2	55.169	175.825	89.624	Non
aPKC sib	h23c2	55.169	209.674	89.624	Non
aPKC sib	h23c2	55.169	242.143	89.624	Non
aPKC sib	h23c2	55.547	301.265	90.227	Non
aPKC sib	h23c2	55.547	344.437	90.227	Non
aPKC sib	h23c2	55.547	382.235	90.227	Non
aPKC sib	h23c2	55.547	398.93	90.227	Non
aPKC sib	h23c2	58.735	412.342	95.408	Non
aPKC sib	h23c3	59.113	129.933	96.046	Non
aPKC sib	h23c3	59.113	162.833	96.046	Non
aPKC sib	h23c3	59.113	201.312	96.046	Non
aPKC sib	h23c3	58.897	254.253	95.687	Non
aPKC sib	h23c3	58.897	294.082	95.687	Non
aPKC sib	h23c3	58.897	339.057	95.687	Non
aPKC sib	h23c3	58.897	376.863	95.687	Non
aPKC sib	h23c3	58.897	370.82	95.687	Non
aPKC sib	h23c3	58.897	333.049	95.687	Non
aPKC sib	h23c4	47.118	130.87	76.547	Non
aPKC sib	h23c4	47.118	153.345	76.547	Non
aPKC sib	h23c4	47.118	190.06	76.547	Non
aPKC sib	h23c4	47.118	223.231	76.547	Non
aPKC sib	h23c4	47.118	260.324	76.547	Non
aPKC sib	h23c4	46.523	332.592	75.553	Non
aPKC sib	h23c4	46.523	387.956	75.553	Non
aPKC sib	h23c4	46.523	438.999	75.553	Non
aPKC sib	h23c4	46.523	445.904	75.553	Non
aPKC sib	h23c4	46.523	401.702	75.553	Non
aPKC sib	h23c4	48.955	407.049	79.52	Non
aPKC sib	h24c1	47.01	314.08	76.362	Non
aPKC sib	h24c1	47.01	312.135	76.362	Non
aPKC sib	h24c1	47.55	298.998	77.229	Non
aPKC sib	h24c1	47.55	321.302	77.229	Non
aPKC sib	h24c1	47.55	331.197	77.229	Non
aPKC sib	h24c1	46.794	384.098	76.006	Non
aPKC sib	h24c1	46.794	374.232	76.006	Non
aPKC sib	h24c1	46.794	360.877	76.006	Non
aPKC sib	h24c1	46.794	345.017	76.006	Non
aPKC sib	h24c1	46.794	337.64	76.006	Non
aPKC sib	h24c1	46.632	347.637	75.745	Non
aPKC sib	h24c1	46.632	349.335	75.745	Non
aPKC sib	h24c1	46.632	334.522	75.745	Non
aPKC sib	h24c2	43.011	189.001	69.859	Non
aPKC sib	h24c2	43.011	229.744	69.859	Non
aPKC sib	h24c2	43.011	268.135	69.859	Non
aPKC sib	h24c2	43.011	296.068	69.859	Non
aPKC sib	h24c2	43.011	324.773	69.859	Non
aPKC sib	h24c2	43.011	344.469	69.859	Non
aPKC sib	h24c2	43.011	354.591	69.859	Non
aPKC sib	h24c2	43.011	366.095	69.859	Non
aPKC sib	h24c2	43.011	372.729	69.859	Non
aPKC sib	h24c2	42.417	469.959	68.902	Non
aPKC sib	h24c2	42.417	473.289	68.902	Non
aPKC sib	h24c2	41.931	541.166	68.084	Non
aPKC sib	h24c2	41.931	554.846	68.084	Non
aPKC sib	h24c2	41.931	546.897	68.084	Non
aPKC sib	h24c2	41.931	521.856	68.084	Non
aPKC sib	h24c2	41.931	475.693	68.084	Non
aPKC sib	h24c3	57.979	197.413	94.203	Non
aPKC sib	h24c3	57.979	225.672	94.203	Non
aPKC sib	h24c3	57.979	244.052	94.203	Non
aPKC sib	h24c3	57.979	261.071	94.203	Non
aPKC sib	h24c3	57.979	271.462	94.203	Non
aPKC sib	h24c3	57.979	290.107	94.203	Non
aPKC sib	h24c3	57.979	309.109	94.203	Non
aPKC sib	h24c3	57.979	342.159	94.203	Non
aPKC sib	h24c3	57.979	364.141	94.203	Non
aPKC sib	h24c3	57.979	366.764	94.203	Non
aPKC sib	h24c3	57.979	365.896	94.203	Non
aPKC sib	h24c3	57.979	367.931	94.203	Non
aPKC sib	h24c4	47.01	139.966	76.356	Non
aPKC sib	h24c4	47.01	152.806	76.356	Non
aPKC sib	h24c4	47.01	170.164	76.356	Non
aPKC sib	h24c4	47.01	199.94	76.356	Non
aPKC sib	h24c4	47.01	221.546	76.356	Non
aPKC sib	h24c4	47.01	236.195	76.356	Non
aPKC sib	h24c4	47.01	256.702	76.356	Non
aPKC sib	h24c4	47.01	280.865	76.356	Non
aPKC sib	h24c4	47.01	288.222	76.356	Non
aPKC sib	h24c4	47.01	285.462	76.356	Non
aPKC sib	h24c4	47.01	279.341	76.356	Non
aPKC sib	h25c1	45.659	204.896	74.145	Non
aPKC sib	h25c1	45.659	265.344	74.145	Non
aPKC sib	h25c1	45.659	280.939	74.145	Non
aPKC sib	h25c1	45.659	293.907	74.145	Non
aPKC sib	h25c1	45.659	333.754	74.145	Non
aPKC sib	h25c1	45.659	386.677	74.145	Non
aPKC sib	h25c1	45.659	419.811	74.145	Non
aPKC sib	h25c2	52.089	168.306	84.615	Non
aPKC sib	h25c2	52.089	215.882	84.615	Non
aPKC sib	h25c2	52.089	229.287	84.615	Non
aPKC sib	h25c2	52.089	241.402	84.615	Non
aPKC sib	h25c2	52.089	263.783	84.615	Non
aPKC sib	h25c2	52.089	293.402	84.615	Non
aPKC sib	h25c2	52.089	317.316	84.615	Non
aPKC sib	h25c2	52.089	319.766	84.615	Non
aPKC sib	h25c2	52.089	302.846	84.615	Non
aPKC sib	h25c4	53.332	161.837	86.628	Non
aPKC sib	h25c4	53.332	233.086	86.628	Non
aPKC sib	h25c4	53.332	255.979	86.628	Non
aPKC sib	h25c4	53.332	271.956	86.628	Non
aPKC sib	h25c4	53.332	313.326	86.628	Non
aPKC sib	h25c4	53.332	354.762	86.628	Non
aPKC sib	h25c4	53.332	373.337	86.628	Non
aPKC sib	h25c4	53.332	340.831	86.628	Non
aPKC sib	h25c4	53.332	287.159	86.628	Non
aPKC sib	h25c5	54.521	213.35	88.567	Non
aPKC sib	h25c5	54.521	227.472	88.567	Non
aPKC sib	h25c5	54.521	242.889	88.567	Non
aPKC sib	h25c5	54.521	274.155	88.567	Non
aPKC sib	h25c5	54.521	308.935	88.567	Non
aPKC sib	h25c5	54.521	338.652	88.567	Non
aPKC sib	h25c5	54.521	335.924	88.567	Non
aPKC sib	h26c1	64.571	141.036	104.918	Non
aPKC sib	h26c1	64.571	177.078	104.918	Non
aPKC sib	h26c1	64.571	226.732	104.918	Non
aPKC sib	h26c1	61.545	250.73	100.001	Non
aPKC sib	h26c1	61.545	293.654	100.001	Non
aPKC sib	h26c1	61.545	317.281	100.001	Non
aPKC sib	h26c1	61.545	370.308	100.001	Non
aPKC sib	h26c1	61.869	406.798	100.513	Non
aPKC sib	h26c1	61.869	394.985	100.513	Non
aPKC sib	h26c2	48.036	168.183	78.028	Non
aPKC sib	h26c2	48.036	212.801	78.028	Non
aPKC sib	h26c2	48.036	236.245	78.028	Non
aPKC sib	h26c2	48.036	266.762	78.028	Non
aPKC sib	h26c2	48.036	294.226	78.028	Non
aPKC sib	h26c2	48.036	323.136	78.028	Non
aPKC sib	h26c2	48.036	313.618	78.028	Non
aPKC sib	h26c3	49.387	136.115	80.217	Non
aPKC sib	h26c3	49.387	188.204	80.217	Non
aPKC sib	h26c3	49.387	208.132	80.217	Non
aPKC sib	h26c3	49.387	249.109	80.217	Non
aPKC sib	h26c3	49.387	276.18	80.217	Non
aPKC sib	h26c3	49.766	328.632	80.847	Non
aPKC sib	h26c3	49.766	354.628	80.847	Non
aPKC sib	h26c3	49.766	347.398	80.847	Non
aPKC sib	h26c3	49.766	318.809	80.847	Non
aPKC sib	h26c3	49.766	268.753	80.847	Non
aPKC sib	h27c1	51.873	167.872	84.262	Non
aPKC sib	h27c1	51.873	215.631	84.262	Non
aPKC sib	h27c1	51.873	258.799	84.262	Non
aPKC sib	h27c1	51.873	305.725	84.262	Non
aPKC sib	h27c1	50.414	427.606	81.908	Non
aPKC sib	h27c1	50.414	495.8	81.908	Non
aPKC sib	h27c1	50.414	505.763	81.908	Non
aPKC sib	h27c2	46.469	223.237	75.465	Non
aPKC sib	h27c2	46.469	277.68	75.465	Non
aPKC sib	h27c2	46.469	301.169	75.465	Non
aPKC sib	h27c2	46.469	313.117	75.465	Non
aPKC sib	h27c2	46.469	323.622	75.465	Non
aPKC sib	h27c2	41.931	406.998	68.091	Non
aPKC sib	h27c2	41.931	390.078	68.091	Non
aPKC sib	h27c2	41.931	324.271	68.091	Non
aPKC sib	h27c2	41.931	270.653	68.091	Non
aPKC sib	h27c3	56.79	179.198	92.27	Non
aPKC sib	h27c3	56.79	251.574	92.27	Non
aPKC sib	h27c3	56.196	270.636	91.294	Non
aPKC sib	h27c3	56.196	301.801	91.294	Non
aPKC sib	h27c3	56.196	342.581	91.294	Non
aPKC sib	h27c3	56.196	390.684	91.294	Non
aPKC sib	h27c3	51.224	574.721	83.223	Non
aPKC sib	h27c3	51.224	524.286	83.223	Non
aPKC sib	h27c3	51.224	453.755	83.223	Non
aPKC sib	h27c4	62.464	207.172	101.497	Non
aPKC sib	h27c4	62.464	265.87	101.497	Non
aPKC sib	h27c4	62.464	284.984	101.497	Non
aPKC sib	h27c4	62.464	306.756	101.497	Non
aPKC sib	h27c4	58.735	356.466	95.421	Non
aPKC sib	h27c4	59.924	457.694	97.366	Non
aPKC sib	h27c4	59.924	477.461	97.366	Non
aPKC sib	h27c4	59.924	433.457	97.366	Non
aPKC sib	h27c4	57.654	417.039	93.659	Non
aPKC sib	h28c1	56.952	204.171	92.517	Non
aPKC sib	h28c1	56.952	225.748	92.517	Non
aPKC sib	h28c1	56.952	258.639	92.517	Non
aPKC sib	h28c1	56.952	297.602	92.517	Non
aPKC sib	h28c1	56.952	330.472	92.517	Non
aPKC sib	h28c1	56.952	352.604	92.517	Non
aPKC sib	h28c1	56.952	342.978	92.517	Non
aPKC sib	h28c1	56.952	306.446	92.517	Non
aPKC sib	h28c1	52.413	303.729	85.133	Non
aPKC sib	h28c1	52.413	286.61	85.133	Non
aPKC sib	h28c2	61.329	154.213	99.639	Non
aPKC sib	h28c2	61.329	169.679	99.639	Non
aPKC sib	h28c2	61.329	188.219	99.639	Non
aPKC sib	h28c2	60.572	238.066	98.407	Non
aPKC sib	h28c2	60.572	270.274	98.407	Non
aPKC sib	h28c2	60.572	288.041	98.407	Non
aPKC sib	h28c2	60.302	315.694	97.949	Non
aPKC sib	h28c2	52.143	309.466	84.698	Non
aPKC sib	h28c2	52.143	301.255	84.698	Non
aPKC sib	h28c3	50.468	164.439	81.986	Non
aPKC sib	h28c3	50.468	209.979	81.986	Non
aPKC sib	h28c3	50.468	236.573	81.986	Non
aPKC sib	h28c3	50.468	258.054	81.986	Non
aPKC sib	h28c3	50.468	286.909	81.986	Non
aPKC sib	h28c3	50.468	325.172	81.986	Non
aPKC sib	h28c3	50.468	338.514	81.986	Non
aPKC sib	h28c3	51.116	323.373	83.038	Non
aPKC sib	h28c3	51.116	296.628	83.038	Non
aPKC sib	h28c3	51.116	244.755	83.038	Non
aPKC sib	h29c1	47.334	173.164	76.887	Non
aPKC sib	h29c1	47.334	217.178	76.887	Non
aPKC sib	h29c1	47.334	249.937	76.887	Non
aPKC sib	h29c1	47.334	288.038	76.887	Non
aPKC sib	h29c1	47.334	318.479	76.887	Non
aPKC sib	h29c1	47.334	327.141	76.887	Non
aPKC sib	h29c1	44.902	369.729	72.919	Non
aPKC sib	h29c1	44.902	356.739	72.919	Non
aPKC sib	h29c2	51.116	198.595	83.04	Non
aPKC sib	h29c2	51.116	243.203	83.04	Non
aPKC sib	h29c2	51.116	288.023	83.04	Non
aPKC sib	h29c2	51.116	315.346	83.04	Non
aPKC sib	h29c2	51.116	323.222	83.04	Non
aPKC sib	h29c2	51.116	313.829	83.04	Non
aPKC sib	h29c3	59.276	123.621	96.305	Non
aPKC sib	h29c3	59.276	158.786	96.305	Non
aPKC sib	h29c3	59.276	197.299	96.305	Non
aPKC sib	h29c3	59.276	244.55	96.305	Non
aPKC sib	h29c3	59.276	295.939	96.305	Non
aPKC sib	h29c3	59.276	315.96	96.305	Non
aPKC sib	h29c3	59.276	314.909	96.305	Non
aPKC sib	h29c3	59.276	291.616	96.305	Non
aPKC sib	h29c4	50.846	123.654	82.581	Non
aPKC sib	h29c4	50.846	155.079	82.581	Non
aPKC sib	h29c4	50.846	190.354	82.581	Non
aPKC sib	h29c4	52.035	236.366	84.535	Non
aPKC sib	h29c4	52.035	272.148	84.535	Non
aPKC sib	h29c4	52.035	283.086	84.535	Non
aPKC sib	h29c4	52.035	277.182	84.535	Non
aPKC sib	h29c4	52.035	264.865	84.535	Non
aPKC sib	h30c1	57.222	170.517	92.98	Non
aPKC sib	h30c1	57.222	222.399	92.98	Non
aPKC sib	h30c1	57.222	285.66	92.98	Non
aPKC sib	h30c1	57.222	338.795	92.98	Non
aPKC sib	h30c1	57.222	355.251	92.98	Non
aPKC sib	h30c1	57.222	335.747	92.98	Non
aPKC sib	h30c1	57.222	301.706	92.98	Non
aPKC sib	h30c2	70.893	140.658	115.193	Non
aPKC sib	h30c2	70.785	187.618	115.038	Non
aPKC sib	h30c2	70.785	233.518	115.038	Non
aPKC sib	h30c2	70.785	265.191	115.038	Non
aPKC sib	h30c2	70.785	268.256	115.038	Non
aPKC sib	h30c2	70.785	255.367	115.038	Non
aPKC sib	h30c2	70.785	239.648	115.038	Non
aPKC sib	h30c3	56.358	139.942	91.555	Non
aPKC sib	h30c3	56.358	174.404	91.555	Non
aPKC sib	h30c3	56.358	211.938	91.555	Non
aPKC sib	h30c3	59.005	289.144	95.861	Non
aPKC sib	h30c3	59.005	315.479	95.861	Non
aPKC sib	h30c3	41.985	324.006	68.179	Non
aPKC sib	h30c3	41.985	336.249	68.179	Non
aPKC sib	h31c1	50.468	301.532	81.973	Non
aPKC sib	h31c1	50.468	405.21	81.973	Non
aPKC sib	h31c1	50.468	493.28	81.973	Non
aPKC sib	h31c1	50.63	696.842	82.237	Non
aPKC sib	h31c1	50.63	775.558	82.237	Non
aPKC sib	h31c1	50.63	680.586	82.237	Non
aPKC sib	h31c2	43.498	259.47	70.641	Non
aPKC sib	h31c2	43.498	371.495	70.641	Non
aPKC sib	h31c2	43.498	465.355	70.641	Non
aPKC sib	h31c2	43.498	557.815	70.641	Non
aPKC sib	h31c2	43.498	617.455	70.641	Non
aPKC sib	h31c2	43.498	540.552	70.641	Non
aPKC sib	h31c3	52.305	162.302	84.95	Non
aPKC sib	h31c3	52.305	214.93	84.95	Non
aPKC sib	h31c3	52.251	287.724	84.884	Non
aPKC sib	h31c3	52.251	337.709	84.884	Non
aPKC sib	h31c3	52.251	416.365	84.884	Non
aPKC sib	h31c3	52.251	501.25	84.884	Non
aPKC sib	h31c3	52.251	541.616	84.884	Non
aPKC sib	h31c3	52.251	536.654	84.884	Non
aPKC sib	h31c3	52.251	495.816	84.884	Non
aPKC sib	h31c4	41.39	187.544	67.206	Non
aPKC sib	h31c4	41.39	241.705	67.206	Non
aPKC sib	h31c4	41.39	307.43	67.206	Non
aPKC sib	h31c4	41.39	368.364	67.206	Non
aPKC sib	h31c4	40.688	478.245	66.077	Non
aPKC sib	h31c4	40.688	578.285	66.077	Non
aPKC sib	h31c4	40.688	619.496	66.077	Non
aPKC sib	h31c4	40.688	617.096	66.077	Non
aPKC sib	h31c4	41.336	591.363	67.135	Non
aPKC sib	h31c4	41.336	538.495	67.135	Non
aPKC sib	h31c5	51.332	178.564	83.384	Non
aPKC sib	h31c5	51.332	235.715	83.384	Non
aPKC sib	h31c5	51.332	290.503	83.384	Non
aPKC sib	h31c5	51.332	330.257	83.384	Non
aPKC sib	h31c5	51.332	388.89	83.384	Non
aPKC sib	h31c5	51.224	519.807	83.219	Non
aPKC sib	h31c5	51.224	545.053	83.219	Non
aPKC sib	h31c5	51.224	536.138	83.219	Non
aPKC sib	h31c5	51.224	490.221	83.219	Non
aPKC sib	h32c1	59.492	168.422	96.642	Non
aPKC sib	h32c1	59.492	208.362	96.642	Non
aPKC sib	h32c1	59.492	240.694	96.642	Non
aPKC sib	h32c1	59.167	287.768	96.119	Non
aPKC sib	h32c1	59.167	329.323	96.119	Non
aPKC sib	h32c1	59.167	365.562	96.119	Non
aPKC sib	h32c1	59.167	381.523	96.119	Non
aPKC sib	h32c1	59.167	373.71	96.119	Non
aPKC sib	h32c1	41.768	358.507	67.825	Non
aPKC sib	h32c2	60.734	175.81	98.679	Non
aPKC sib	h32c2	60.734	226.278	98.679	Non
aPKC sib	h32c2	60.734	259.995	98.679	Non
aPKC sib	h32c2	60.734	273.944	98.679	Non
aPKC sib	h32c2	60.734	293.446	98.679	Non
aPKC sib	h32c2	60.734	312.783	98.679	Non
aPKC sib	h32c2	60.951	324.106	99.037	Non
aPKC sib	h32c2	60.951	308.801	99.037	Non
aPKC sib	h32c2	42.039	278.802	68.273	Non
aPKC sib	h32c2	42.039	256.511	68.273	Non
aPKC mut	h1c1	45.474	221.386	69.76	Non
aPKC mut	h1c1	44.989	306.148	69.014	Non
aPKC mut	h1c1	44.989	408.339	69.011	Non
aPKC mut	h1c1	44.989	416.658	69.011	Non
aPKC mut	h1c1	44.444	467.53	68.17	Non
aPKC mut	h1c1	45.413	495.413	69.645	Non
aPKC mut	h1c1	45.231	519.584	69.388	Non
aPKC mut	h1c1	44.384	551.269	68.092	Non
aPKC mut	h1c1	44.384	588.51	68.084	Non
aPKC mut	h1c1	44.686	617.009	68.541	Non
aPKC mut	h1c2	57.099	205.682	87.606	Non
aPKC mut	h1c2	57.099	254.839	87.606	Non
aPKC mut	h1c2	57.039	342.83	87.522	Non
aPKC mut	h1c2	57.039	370.819	87.522	Non
aPKC mut	h1c2	57.342	417.225	87.971	Non
aPKC mut	h1c2	57.402	436.908	88.083	Non
aPKC mut	h1c2	57.342	433.8	87.992	Non
aPKC mut	h1c2	58.129	508.828	89.194	Non
aPKC mut	h1c2	58.129	525.877	89.194	Non
aPKC mut	h1c2	58.31	572.459	89.474	Non
aPKC mut	h1c2	52.921	630.049	81.202	Non
aPKC mut	h1c3	40.63	159.278	62.314	Non
aPKC mut	h1c3	40.63	225.124	62.314	Non
aPKC mut	h1c3	40.63	310.467	62.314	Non
aPKC mut	h1c3	40.206	352.954	61.659	Non
aPKC mut	h1c3	40.206	378.094	61.659	Non
aPKC mut	h1c3	40.206	400.005	61.659	Non
aPKC mut	h1c3	42.022	470.57	64.475	Non
aPKC mut	h1c3	42.022	519.542	64.475	Non
aPKC mut	h1c3	41.356	585.476	63.45	Non
aPKC mut	h1c4	43.475	208.836	66.688	Non
aPKC mut	h1c4	43.475	294.696	66.688	Non
aPKC mut	h1c4	43.233	327.152	66.317	Non
aPKC mut	h1c4	43.233	345.061	66.317	Non
aPKC mut	h1c4	44.02	369.654	67.521	Non
aPKC mut	h1c4	44.02	384.285	67.53	Non
aPKC mut	h1c4	44.02	395.951	67.53	Non
aPKC mut	h1c4	44.444	405.342	68.182	Non
aPKC mut	h1c4	44.444	454.517	68.18	Non
aPKC mut	h1c4	45.171	515.473	69.286	Non
aPKC mut	h1c5	42.386	259.928	65.03	Non
aPKC mut	h1c5	42.446	334.724	65.11	Non
aPKC mut	h1c5	42.446	370.994	65.11	Non
aPKC mut	h1c5	42.446	376.048	65.11	Non
aPKC mut	h1c5	42.446	378.543	65.11	Non
aPKC mut	h1c5	41.659	433.673	63.907	Non
aPKC mut	h1c5	41.114	581.323	63.056	Non
aPKC mut	h1c5	41.114	552.192	63.066	Non
aPKC mut	h2c1	40.569	238.226	62.231	Non
aPKC mut	h2c1	40.569	260.567	62.231	Non
aPKC mut	h2c1	40.569	297.774	62.231	Non
aPKC mut	h2c1	40.751	319.022	62.518	Non
aPKC mut	h2c1	40.751	327.01	62.518	Non
aPKC mut	h2c1	40.508	353.927	62.125	Non
aPKC mut	h2c1	41.053	382.985	62.976	Non
aPKC mut	h2c1	40.932	401.715	62.791	Non
aPKC mut	h2c1	40.932	420.235	62.787	Non
aPKC mut	h2c1	40.811	456.023	62.596	Non
aPKC mut	h2c1	40.811	463.953	62.602	Non
aPKC mut	h2c1	40.932	473.208	62.789	Non
aPKC mut	h2c1	41.901	459.933	64.281	Non
aPKC mut	h2c1	36.452	447.803	55.902	Non
aPKC mut	h2c1	36.452	467.813	55.902	Non
aPKC mut	h2c1	36.452	441.244	55.902	Non
aPKC mut	h2c2	43.475	269.728	66.689	Non
aPKC mut	h2c2	43.475	299.999	66.689	Non
aPKC mut	h2c2	43.475	348.407	66.689	Non
aPKC mut	h2c2	43.475	383.28	66.687	Non
aPKC mut	h2c2	44.626	439.948	68.459	Non
aPKC mut	h2c2	44.626	466.025	68.459	Non
aPKC mut	h2c2	44.626	498.372	68.449	Non
aPKC mut	h2c2	44.686	514.948	68.551	Non
aPKC mut	h2c2	44.626	510.685	68.463	Non
aPKC mut	h2c2	44.626	512.905	68.463	Non
aPKC mut	h2c2	43.778	513.573	67.166	Non
aPKC mut	h2c2	43.536	491.349	66.791	Non
aPKC mut	h2c2	43.354	542.073	66.492	Non
aPKC mut	h2c2	35.18	585.959	53.952	Non
aPKC mut	h2c2	35.18	568.042	53.952	Non
aPKC mut	h2c3	44.989	214.757	69.009	Non
aPKC mut	h2c3	44.989	253.41	69.009	Non
aPKC mut	h2c3	44.989	304.005	69.009	Non
aPKC mut	h2c3	44.989	313.268	69.009	Non
aPKC mut	h2c3	44.929	380.737	68.916	Non
aPKC mut	h2c3	44.929	438.546	68.919	Non
aPKC mut	h2c3	44.929	469.931	68.919	Non
aPKC mut	h2c3	44.929	487.037	68.919	Non
aPKC mut	h2c3	44.929	499.524	68.919	Non
aPKC mut	h2c3	44.929	467.803	68.919	Non
aPKC mut	h2c3	41.901	435.948	64.274	Non
aPKC mut	h2c4	45.655	211.801	70.026	Non
aPKC mut	h2c4	45.655	267.037	70.026	Non
aPKC mut	h2c4	45.655	322.64	70.026	Non
aPKC mut	h2c4	45.595	354.849	69.961	Non
aPKC mut	h2c4	45.655	390.735	70.049	Non
aPKC mut	h2c4	45.776	446.479	70.221	Non
aPKC mut	h2c4	45.776	449.978	70.221	Non
aPKC mut	h2c4	45.776	442.983	70.221	Non
aPKC mut	h2c4	45.776	425.521	70.221	Non
aPKC mut	h2c4	45.776	397.111	70.221	Non
aPKC mut	h2c5	43.112	353.329	66.14	Non
aPKC mut	h2c5	43.112	394.742	66.14	Non
aPKC mut	h2c5	42.809	466.123	65.683	Non
aPKC mut	h2c5	42.809	429.504	65.683	Non
aPKC mut	h2c5	42.809	392.899	65.683	Non
aPKC mut	h2c5	42.809	364.904	65.683	Non
aPKC mut	h2c5	42.809	482.611	65.672	Non
aPKC mut	h2c5	42.809	459.742	65.672	Non
aPKC mut	h2c5	42.809	433.776	65.672	Non
aPKC mut	h2c5	41.114	398.383	63.07	Non
aPKC mut	h2c5	39.116	457.527	59.996	Non
aPKC mut	h2c5	39.116	451.652	59.996	Non
aPKC mut	h2c5	39.54	464.03	60.652	Non
aPKC mut	h2c5	38.874	435.56	59.622	Non
aPKC mut	h2c5	38.389	425.01	58.89	Non
aPKC mut	h2c5	36.209	420.05	55.525	Non
aPKC mut	h2c5	33.061	470.45	50.7	Non
aPKC mut	h2c5	33	436.484	50.598	Non
aPKC mut	h3c1	49.349	365.82	75.718	Non
aPKC mut	h3c1	49.349	387.602	75.718	Non
aPKC mut	h3c1	49.47	433.367	75.901	Non
aPKC mut	h3c1	48.38	556.832	74.227	Non
aPKC mut	h3c1	47.653	662.57	73.097	Non
aPKC mut	h3c1	47.653	698.22	73.097	Non
aPKC mut	h3c1	47.653	788.666	73.097	Non
aPKC mut	h3c1	47.653	863.669	73.097	Non
aPKC mut	h3c1	47.23	957.04	72.466	Non
aPKC mut	h3c2	54.556	422.015	83.702	Non
aPKC mut	h3c2	54.556	430.613	83.702	Non
aPKC mut	h3c2	53.951	467.265	82.784	Non
aPKC mut	h3c2	53.951	532.124	82.784	Non
aPKC mut	h3c2	53.466	643.931	82.047	Non
aPKC mut	h3c2	53.466	693.281	82.047	Non
aPKC mut	h3c2	53.466	788.691	82.031	Non
aPKC mut	h3c2	53.466	775.124	82.031	Non
aPKC mut	h3c3	54.556	422.015	83.702	Non
aPKC mut	h3c3	54.556	430.613	83.702	Non
aPKC mut	h3c3	53.951	467.265	82.784	Non
aPKC mut	h3c3	53.951	532.124	82.784	Non
aPKC mut	h3c3	53.466	643.931	82.047	Non
aPKC mut	h3c3	53.466	693.281	82.047	Non
aPKC mut	h3c3	53.466	788.691	82.031	Non
aPKC mut	h3c3	53.466	775.124	82.031	Non
aPKC mut	h3c4	46.2	261.972	70.873	Non
aPKC mut	h3c4	46.2	297.592	70.873	Non
aPKC mut	h3c4	46.2	333.496	70.873	Non
aPKC mut	h3c4	46.2	341.931	70.873	Non
aPKC mut	h3c4	47.048	427.632	72.174	Non
aPKC mut	h3c4	47.532	498.413	72.934	Non
aPKC mut	h3c4	47.532	579.595	72.934	Non
aPKC mut	h3c4	47.532	633.322	72.915	Non
aPKC mut	h3c4	47.532	687.14	72.915	Non
aPKC mut	h3c5	46.806	293.662	71.814	Non
aPKC mut	h3c5	46.806	364.718	71.814	Non
aPKC mut	h3c5	46.806	389.098	71.814	Non
aPKC mut	h3c5	46.806	400.899	71.814	Non
aPKC mut	h3c5	46.806	406.598	71.814	Non
aPKC mut	h3c5	45.655	469.851	70.034	Non
aPKC mut	h3c5	45.655	471.787	70.034	Non
aPKC mut	h3c5	45.655	499.71	70.034	Non
aPKC mut	h3c5	45.655	502.334	70.034	Non
aPKC mut	h3c5	45.655	506.957	70.034	Non
aPKC mut	h4c1	46.806	284.394	71.797	Non
aPKC mut	h4c1	46.806	425.797	71.797	Non
aPKC mut	h4c1	45.231	476.985	69.377	Non
aPKC mut	h4c1	45.474	586.445	69.772	Non
aPKC mut	h4c1	45.837	605.908	70.316	Non
aPKC mut	h4c1	45.837	529.827	70.306	Non
aPKC mut	h4c1	46.2	535.302	70.869	Non
aPKC mut	h4c1	45.595	654.853	69.941	Non
aPKC mut	h4c1	45.413	723.531	69.664	Non
aPKC mut	h4c1	42.507	768.599	65.197	Non
aPKC mut	h4c1	40.206	765.042	61.674	Non
aPKC mut	h4c1	40.206	725.091	61.674	Non
aPKC mut	h4c1	39.782	684.319	61.021	Non
aPKC mut	h4c2	33.303	466.848	51.063	Non
aPKC mut	h4c2	33.303	462.193	51.063	Non
aPKC mut	h4c2	34.211	487.391	52.459	Non
aPKC mut	h4c2	34.393	600.54	52.742	Non
aPKC mut	h4c2	33.969	580.558	52.095	Non
aPKC mut	h4c2	34.09	554.072	52.278	Non
aPKC mut	h4c2	34.635	605.417	53.11	Non
aPKC mut	h4c2	34.03	640.077	52.159	Non
aPKC mut	h4c2	34.03	684.582	52.181	Non
aPKC mut	h4c2	34.03	676.513	52.181	Non
aPKC mut	h4c2	34.332	653.16	52.649	Non
aPKC mut	h4c2	33.061	572.389	50.695	Non
aPKC mut	h4c3	41.78	219.73	64.092	Non
aPKC mut	h4c3	41.841	316.585	64.172	Non
aPKC mut	h4c3	41.719	382.764	63.993	Non
aPKC mut	h4c3	41.719	383.05	63.993	Non
aPKC mut	h4c3	41.78	451.926	64.079	Non
aPKC mut	h4c3	41.78	476.483	64.079	Non
aPKC mut	h4c3	41.78	503.404	64.079	Non
aPKC mut	h4c3	41.538	564.284	63.717	Non
aPKC mut	h4c3	41.538	565.733	63.717	Non
aPKC mut	h4c3	41.538	558.148	63.717	Non
aPKC mut	h4c3	41.962	549.569	64.358	Non
aPKC mut	h4c3	41.962	538.14	64.358	Non
aPKC mut	h4c3	42.446	497.113	65.123	Non
aPKC mut	h4c3	42.446	492.315	65.123	Non
aPKC mut	h4c3	42.022	520.388	64.452	Non
aPKC mut	h4c3	42.022	492.263	64.452	Non
aPKC mut	h4c4	40.387	164.336	61.941	Non
aPKC mut	h4c4	40.387	239.575	61.941	Non
aPKC mut	h4c4	40.387	350.637	61.947	Non
aPKC mut	h4c4	40.387	328.937	61.945	Non
aPKC mut	h4c4	40.387	301.103	61.945	Non
aPKC mut	h4c4	40.508	354.365	62.132	Non
aPKC mut	h4c4	40.508	353.586	62.132	Non
aPKC mut	h4c4	40.508	319.662	62.132	Non
aPKC mut	h4c4	41.114	325.561	63.043	Non
aPKC mut	h4c4	41.114	325.323	63.043	Non
aPKC mut	h4c4	41.114	315.677	63.043	Non
aPKC mut	h4c4	41.417	352.049	63.522	Non
aPKC mut	h4c4	42.446	347.881	65.102	Non
aPKC mut	h4c4	42.446	354.705	65.102	Non
aPKC mut	h4c4	41.538	390.305	63.707	Non
aPKC mut	h4c4	30.094	375.52	46.132	Non
aPKC mut	h4c5	40.932	195.08	62.784	Non
aPKC mut	h4c5	40.993	262.441	62.883	Non
aPKC mut	h4c5	40.993	292.33	62.883	Non
aPKC mut	h4c5	40.811	323.814	62.595	Non
aPKC mut	h4c5	40.811	308.553	62.595	Non
aPKC mut	h4c5	42.628	308.327	65.359	Non
aPKC mut	h4c5	43.415	342.341	66.605	Non
aPKC mut	h4c5	42.386	374.018	65.017	Non
aPKC mut	h4c5	43.052	394.288	66.045	Non
aPKC mut	h4c5	43.294	393.468	66.404	Non
aPKC mut	h4c5	43.778	403.552	67.157	Non
aPKC mut	h4c5	43.778	383.332	67.157	Non
aPKC mut	h4c5	41.175	435.376	63.159	Non
aPKC mut	h4c5	39.176	476.13	60.091	Non
aPKC mut	h4c5	33.485	420.595	51.351	Non
aPKC mut	h4c5	33.485	424.007	51.351	Non
aPKC mut	h5c1	43.294	225.629	66.406	Non
aPKC mut	h5c1	42.991	310.792	65.949	Non
aPKC mut	h5c1	42.991	341.783	65.949	Non
aPKC mut	h5c1	42.991	352.531	65.942	Non
aPKC mut	h5c1	42.022	408.3	64.479	Non
aPKC mut	h5c1	41.901	465.689	64.275	Non
aPKC mut	h5c1	41.659	518.816	63.9	Non
aPKC mut	h5c1	41.841	565.526	64.178	Non
aPKC mut	h5c1	41.962	537.158	64.353	Non
aPKC mut	h5c1	41.841	530.556	64.188	Non
aPKC mut	h5c1	41.841	497.864	64.188	Non
aPKC mut	h5c1	41.901	493.648	64.259	Non
aPKC mut	h5c1	40.63	552.436	62.332	Non
aPKC mut	h5c1	39.721	549.875	60.919	Non
aPKC mut	h5c1	38.147	565.909	58.501	Non
aPKC mut	h5c1	37.663	552.107	57.769	Non
aPKC mut	h5c1	36.936	518.547	56.644	Non
aPKC mut	h5c1	33.121	578.433	50.784	Non
aPKC mut	h5c1	33.121	503.8	50.784	Non
aPKC mut	h5c2	36.452	352.267	55.901	Non
aPKC mut	h5c2	36.452	442.331	55.901	Non
aPKC mut	h5c2	36.452	490.686	55.901	Non
aPKC mut	h5c2	36.452	516.924	55.901	Non
aPKC mut	h5c2	36.452	523.464	55.901	Non
aPKC mut	h5c2	37.118	570.329	56.928	Non
aPKC mut	h5c2	37.481	720.638	57.485	Non
aPKC mut	h5c2	37.723	723.966	57.86	Non
aPKC mut	h5c2	37.844	708.329	58.039	Non
aPKC mut	h5c2	37.844	672.751	58.039	Non
aPKC mut	h5c2	37.602	662.649	57.674	Non
aPKC mut	h5c2	37.299	666.235	57.205	Non
aPKC mut	h5c2	37.299	683.056	57.205	Non
aPKC mut	h5c2	36.512	759.77	55.995	Non
aPKC mut	h5c2	32.092	688.421	49.208	Non
aPKC mut	h5c2	31.85	684.286	48.842	Non
aPKC mut	h5c2	27.853	645.307	42.689	Non
aPKC mut	h5c3	47.108	228.023	72.267	Non
aPKC mut	h5c3	47.108	312.509	72.267	Non
aPKC mut	h5c3	47.108	379.87	72.267	Non
aPKC mut	h5c3	47.108	398.217	72.267	Non
aPKC mut	h5c3	47.411	424.34	72.737	Non
aPKC mut	h5c3	47.108	469.608	72.261	Non
aPKC mut	h5c3	47.593	551.727	73.014	Non
aPKC mut	h5c3	47.956	613.316	73.59	Non
aPKC mut	h5c3	47.956	635.048	73.59	Non
aPKC mut	h5c3	47.956	627.598	73.59	Non
aPKC mut	h5c3	47.956	581.426	73.59	Non
aPKC mut	h5c3	45.353	584.911	69.571	Non
aPKC mut	h5c3	45.05	606.127	69.118	Non
aPKC mut	h5c3	44.384	548.007	68.09	Non
aPKC mut	h5c3	44.141	580.296	67.715	Non
aPKC mut	h5c3	44.202	556.424	67.801	Non
aPKC mut	h5c3	43.778	594.962	67.158	Non
aPKC mut	h5c3	44.141	565.197	67.715	Non
aPKC mut	h5c3	32.213	458.712	49.401	Non
aPKC mut	h5c4	42.628	441.296	65.381	Non
aPKC mut	h5c4	42.628	466.853	65.381	Non
aPKC mut	h5c4	42.567	517.453	65.307	Non
aPKC mut	h5c4	42.567	489.01	65.307	Non
aPKC mut	h5c4	43.778	506.003	67.161	Non
aPKC mut	h5c4	43.475	564.571	66.681	Non
aPKC mut	h5c4	43.778	497.951	67.156	Non
aPKC mut	h5c4	42.809	524.301	65.672	Non
aPKC mut	h5c4	42.204	591.307	64.74	Non
aPKC mut	h5c4	42.204	564.37	64.74	Non
aPKC mut	h5c4	42.204	522.247	64.74	Non
aPKC mut	h5c4	37.844	525.797	58.032	Non
aPKC mut	h5c4	37.844	532.051	58.032	Non
aPKC mut	h5c4	37.844	538.53	58.032	Non
aPKC mut	h5c4	37.844	500.232	58.032	Non
aPKC mut	h5c4	33.969	462.902	52.092	Non
aPKC mut	h6c1	41.901	391.544	64.27	Non
aPKC mut	h6c1	41.901	451.969	64.27	Non
aPKC mut	h6c1	41.901	482.997	64.27	Non
aPKC mut	h6c1	41.356	512.454	63.436	Non
aPKC mut	h6c1	41.235	625.956	63.245	Non
aPKC mut	h6c1	41.175	688.41	63.15	Non
aPKC mut	h6c1	38.389	842.616	58.868	Non
aPKC mut	h6c1	39.237	871.669	60.184	Non
aPKC mut	h6c1	36.875	1011.995	56.55	Non
aPKC mut	h6c1	35.604	1043.188	54.604	Non
aPKC mut	h6c2	50.378	419.565	77.295	Non
aPKC mut	h6c2	50.378	464.143	77.295	Non
aPKC mut	h6c2	50.318	500.083	77.191	Non
aPKC mut	h6c2	50.197	552.403	77.007	Non
aPKC mut	h6c2	49.954	610.765	76.644	Non
aPKC mut	h6c2	50.499	735.905	77.517	Non
aPKC mut	h6c2	50.499	829.999	77.517	Non
aPKC mut	h6c2	49.47	1005.326	75.896	Non
aPKC mut	h6c3	49.288	418.072	75.624	Non
aPKC mut	h6c3	48.864	453.271	74.979	Non
aPKC mut	h6c3	48.804	467.799	74.872	Non
aPKC mut	h6c3	48.804	457.78	74.872	Non
aPKC mut	h6c3	48.077	557.241	73.763	Non
aPKC mut	h6c3	48.017	660.824	73.671	Non
aPKC mut	h6c3	48.017	718.745	73.671	Non
aPKC mut	h6c3	48.017	760.669	73.671	Non
aPKC mut	h6c3	48.017	819.999	73.671	Non
aPKC mut	h6c3	47.351	978.716	72.634	Non
aPKC mut	h6c3	44.141	938.204	67.727	Non
aPKC mut	h6c3	40.932	952.921	62.781	Non
aPKC mut	h6c4	50.015	285.45	76.726	Non
aPKC mut	h6c4	48.683	377.238	74.684	Non
aPKC mut	h6c4	48.683	404.097	74.684	Non
aPKC mut	h6c4	48.562	446.952	74.519	Non
aPKC mut	h6c4	48.562	436.836	74.519	Non
aPKC mut	h6c4	48.743	509.669	74.784	Non
aPKC mut	h6c4	48.743	574.46	74.784	Non
aPKC mut	h6c4	48.864	689.254	74.974	Non
aPKC mut	h6c4	48.864	827.353	74.974	Non
aPKC mut	h6c4	49.833	981.877	76.47	Non
aPKC mut	h6c4	50.863	1003.26	78.047	Non
aPKC mut	h6c5	48.622	420.523	74.601	Non
aPKC mut	h6c5	48.622	462.388	74.601	Non
aPKC mut	h6c5	48.622	438.972	74.601	Non
aPKC mut	h6c5	48.38	532.897	74.221	Non
aPKC mut	h6c5	48.32	555.815	74.129	Non
aPKC mut	h6c5	48.259	639.513	74.047	Non
aPKC mut	h6c5	49.409	737.276	75.82	Non
aPKC mut	h6c5	49.409	864.259	75.82	Non
aPKC mut	h6c5	49.409	880.094	75.82	Non
aPKC mut	h6c5	49.409	891.99	75.82	Non
aPKC mut	h6c5	49.409	844.785	75.82	Non
aPKC mut	h7c1	39.963	345.791	61.299	Non
aPKC mut	h7c1	39.963	411.136	61.299	Non
aPKC mut	h7c1	39.963	446.212	61.299	Non
aPKC mut	h7c1	40.448	463.568	62.048	Non
aPKC mut	h7c1	40.448	453.586	62.048	Non
aPKC mut	h7c1	40.69	488.599	62.405	Non
aPKC mut	h7c1	40.69	508.419	62.405	Non
aPKC mut	h7c1	40.69	532.691	62.405	Non
aPKC mut	h7c1	41.417	791.164	63.532	Non
aPKC mut	h7c1	41.417	808.902	63.532	Non
aPKC mut	h7c1	41.417	804.175	63.535	Non
aPKC mut	h7c1	41.417	733.059	63.535	Non
aPKC mut	h7c2	34.938	506.577	53.576	Non
aPKC mut	h7c2	34.635	533.044	53.114	Non
aPKC mut	h7c2	34.635	544.586	53.114	Non
aPKC mut	h7c2	34.635	560.551	53.114	Non
aPKC mut	h7c2	34.635	576.405	53.114	Non
aPKC mut	h7c2	34.756	821.115	53.301	Non
aPKC mut	h7c2	34.756	818.115	53.301	Non
aPKC mut	h7c2	34.756	757.188	53.301	Non
aPKC mut	h7c2	34.756	642.624	53.301	Non
aPKC mut	h7c3	48.743	348.189	74.783	Non
aPKC mut	h7c3	48.743	356.749	74.783	Non
aPKC mut	h7c3	48.743	340.036	74.783	Non
aPKC mut	h7c3	48.743	331.577	74.783	Non
aPKC mut	h7c3	48.804	405.634	74.89	Non
aPKC mut	h7c3	48.743	433.304	74.79	Non
aPKC mut	h7c3	48.743	447.382	74.79	Non
aPKC mut	h7c3	48.743	514.831	74.801	Non
aPKC mut	h7c3	49.046	573.467	75.258	Non
aPKC mut	h7c3	49.046	596.175	75.258	Non
aPKC mut	h7c3	40.206	556.356	61.678	Non
aPKC mut	h7c4	46.866	368.666	71.907	Non
aPKC mut	h7c4	46.866	393.938	71.907	Non
aPKC mut	h7c4	47.593	439.798	73.017	Non
aPKC mut	h7c4	45.474	573.92	69.766	Non
aPKC mut	h7c4	45.655	623.576	70.028	Non
aPKC mut	h7c4	45.655	627.342	70.028	Non
aPKC mut	h7c4	44.747	728.581	68.659	Non
aPKC mut	h7c4	45.534	778.226	69.853	Non
aPKC mut	h7c4	45.474	782.521	69.77	Non
aPKC mut	h7c4	37.723	655.254	57.85	Non
aPKC mut	h7c5	48.562	357.445	74.499	Non
aPKC mut	h7c5	48.562	385.847	74.499	Non
aPKC mut	h7c5	48.562	393.288	74.499	Non
aPKC mut	h7c5	48.562	400.689	74.499	Non
aPKC mut	h7c5	48.562	412.61	74.499	Non
aPKC mut	h7c5	48.441	427.449	74.308	Non
aPKC mut	h7c5	48.441	407.618	74.308	Non
aPKC mut	h7c5	48.441	371.782	74.308	Non
aPKC mut	h7c5	48.501	455.07	74.401	Non
aPKC mut	h7c5	46.866	536.679	71.898	Non
aPKC mut	h7c5	46.866	529.465	71.898	Non
aPKC mut	h7c5	48.138	577.547	73.856	Non
aPKC mut	h7c5	48.138	558.847	73.856	Non
aPKC mut	h7c5	48.198	521.005	73.936	Non
aPKC mut	h8c1	38.51	386.633	59.057	Non
aPKC mut	h8c1	38.51	409.768	59.057	Non
aPKC mut	h8c1	38.268	419.047	58.692	Non
aPKC mut	h8c1	38.268	423.223	58.692	Non
aPKC mut	h8c1	38.268	448.891	58.692	Non
aPKC mut	h8c1	38.268	468.57	58.692	Non
aPKC mut	h8c1	38.631	526.228	59.245	Non
aPKC mut	h8c1	37.844	577.826	58.035	Non
aPKC mut	h8c1	37.844	584.282	58.035	Non
aPKC mut	h8c1	37.844	545.699	58.035	Non
aPKC mut	h8c1	34.03	567.363	52.175	Non
aPKC mut	h8c1	34.151	586.331	52.361	Non
aPKC mut	h8c2	36.573	271.694	56.078	Non
aPKC mut	h8c2	36.573	358.925	56.078	Non
aPKC mut	h8c2	36.573	397.971	56.078	Non
aPKC mut	h8c2	36.573	403.496	56.078	Non
aPKC mut	h8c2	36.573	396.059	56.078	Non
aPKC mut	h8c2	36.573	385.492	56.078	Non
aPKC mut	h8c2	36.754	499.352	56.362	Non
aPKC mut	h8c2	36.754	498.598	56.362	Non
aPKC mut	h8c2	37.178	557.466	57.017	Non
aPKC mut	h8c2	37.239	579.987	57.103	Non
aPKC mut	h8c2	37.299	607.43	57.201	Non
aPKC mut	h8c2	37.299	594.78	57.201	Non
aPKC mut	h8c2	34.514	672.2	52.929	Non
aPKC mut	h8c2	29.428	695.765	45.109	Non
aPKC mut	h8c2	26.461	728.712	40.557	Non
aPKC mut	h8c3	46.624	269.87	71.516	Non
aPKC mut	h8c3	46.624	315.528	71.516	Non
aPKC mut	h8c3	46.624	341.361	71.516	Non
aPKC mut	h8c3	46.624	346.335	71.516	Non
aPKC mut	h8c3	46.624	370.181	71.508	Non
aPKC mut	h8c3	46.442	408.76	71.248	Non
aPKC mut	h8c3	46.442	405.988	71.248	Non
aPKC mut	h8c3	46.624	455.223	71.521	Non
aPKC mut	h8c3	46.442	539.913	71.249	Non
aPKC mut	h8c3	48.683	510.406	74.703	Non
aPKC mut	h8c4	43.415	314.03	66.598	Non
aPKC mut	h8c4	43.657	390.898	66.977	Non
aPKC mut	h8c4	43.657	405.263	66.977	Non
aPKC mut	h8c4	42.143	443.712	64.625	Non
aPKC mut	h8c4	42.022	454.89	64.463	Non
aPKC mut	h8c4	41.598	465.849	63.802	Non
aPKC mut	h8c4	41.659	513.628	63.891	Non
aPKC mut	h8c4	41.659	509.36	63.891	Non
aPKC mut	h8c4	39.6	551.682	60.73	Non
aPKC mut	h8c4	42.325	523.661	64.928	Non
aPKC mut	h8c4	40.024	604.246	61.399	Non
aPKC mut	h8c4	39.479	533.615	60.547	Non
aPKC mut	h8c4	38.51	488.837	59.069	Non
aPKC mut	h8c4	34.817	518.443	53.382	Non
aPKC mut	h8c4	30.336	493.009	46.515	Non
aPKC mut	h9c1	48.683	303.041	74.691	Non
aPKC mut	h9c1	48.683	379.35	74.691	Non
aPKC mut	h9c1	48.683	435.752	74.691	Non
aPKC mut	h9c1	48.683	535.225	74.695	Non
aPKC mut	h9c1	48.683	594.511	74.695	Non
aPKC mut	h9c1	48.683	643.468	74.695	Non
aPKC mut	h9c1	48.683	680.964	74.695	Non
aPKC mut	h9c1	48.683	696.841	74.695	Non
aPKC mut	h9c1	48.683	691.368	74.695	Non
aPKC mut	h9c1	48.683	665.277	74.695	Non
aPKC mut	h9c1	48.683	589.076	74.695	Non
aPKC mut	h9c2	52.498	342.713	80.563	Non
aPKC mut	h9c2	52.498	428.065	80.563	Non
aPKC mut	h9c2	52.498	485.148	80.563	Non
aPKC mut	h9c2	52.498	542.332	80.563	Non
aPKC mut	h9c2	52.498	605.084	80.563	Non
aPKC mut	h9c2	52.498	668.508	80.563	Non
aPKC mut	h9c2	52.498	692.105	80.563	Non
aPKC mut	h9c2	54.314	675.678	83.335	Non
aPKC mut	h9c2	54.314	655.209	83.335	Non
aPKC mut	h9c2	54.314	590.427	83.335	Non
aPKC mut	h9c3	46.442	296.602	71.254	Non
aPKC mut	h9c3	46.442	379.945	71.254	Non
aPKC mut	h9c3	46.442	436.303	71.254	Non
aPKC mut	h9c3	46.442	467.445	71.254	Non
aPKC mut	h9c3	46.442	531.376	71.254	Non
aPKC mut	h9c3	46.442	619.403	71.254	Non
aPKC mut	h9c3	46.442	745.645	71.254	Non
aPKC mut	h9c3	46.442	826.137	71.254	Non
aPKC mut	h9c3	46.442	866.492	71.254	Non
aPKC mut	h9c3	46.442	900.539	71.254	Non
aPKC mut	h9c3	46.442	857.484	71.254	Non
aPKC mut	h9c4	46.019	291.675	70.594	Non
aPKC mut	h9c4	46.019	400.513	70.594	Non
aPKC mut	h9c4	46.019	494.32	70.594	Non
aPKC mut	h9c4	46.019	558.146	70.594	Non
aPKC mut	h9c4	46.019	594.841	70.594	Non
aPKC mut	h9c4	46.019	668.995	70.594	Non
aPKC mut	h9c4	46.019	731.928	70.594	Non
aPKC mut	h9c4	46.019	779.049	70.594	Non
aPKC mut	h9c4	46.019	835.702	70.594	Non
aPKC mut	h9c4	46.019	784.778	70.594	Non
aPKC mut	h9c5	46.745	346.02	71.707	Non
aPKC mut	h9c5	46.745	416.706	71.707	Non
aPKC mut	h9c5	46.745	465.952	71.707	Non
aPKC mut	h9c5	46.745	493.343	71.707	Non
aPKC mut	h9c5	46.745	543.996	71.707	Non
aPKC mut	h9c5	46.745	606.068	71.707	Non
aPKC mut	h9c5	46.745	642.423	71.707	Non
aPKC mut	h9c5	46.745	702.507	71.707	Non
aPKC mut	h9c5	46.745	703.864	71.707	Non
aPKC mut	h10c1	54.314	195.447	83.343	Non
aPKC mut	h10c1	54.314	248.366	83.343	Non
aPKC mut	h10c1	54.314	282.576	83.343	Non
aPKC mut	h10c1	54.314	310.862	83.343	Non
aPKC mut	h10c1	54.314	342.44	83.343	Non
aPKC mut	h10c1	54.314	389.082	83.343	Non
aPKC mut	h10c1	54.193	501.757	83.168	Non
aPKC mut	h10c1	54.193	550.86	83.168	Non
aPKC mut	h10c1	54.193	561.796	83.168	Non
aPKC mut	h10c1	54.193	528.592	83.168	Non
aPKC mut	h10c2	48.743	243.606	74.782	Non
aPKC mut	h10c2	48.743	326.341	74.782	Non
aPKC mut	h10c2	48.743	366.305	74.782	Non
aPKC mut	h10c2	48.743	392.572	74.782	Non
aPKC mut	h10c2	48.743	425.219	74.782	Non
aPKC mut	h10c2	48.743	467.996	74.782	Non
aPKC mut	h10c2	46.503	603.518	71.345	Non
aPKC mut	h10c2	46.503	655.735	71.345	Non
aPKC mut	h10c2	46.503	655.575	71.345	Non
aPKC mut	h10c3	35.059	135.64	53.765	Non
aPKC mut	h10c3	35.059	198.617	53.765	Non
aPKC mut	h10c3	35.059	258.504	53.765	Non
aPKC mut	h10c3	35.059	300.64	53.765	Non
aPKC mut	h10c3	35.059	351.149	53.765	Non
aPKC mut	h10c3	35.059	408.274	53.765	Non
aPKC mut	h10c3	35.059	480.067	53.765	Non
aPKC mut	h10c3	35.059	525.789	53.765	Non
aPKC mut	h10c3	35.846	561.286	54.978	Non
aPKC mut	h10c3	35.846	580.97	54.978	Non
aPKC mut	h10c3	35.846	592.02	54.978	Non
aPKC mut	h10c3	35.846	596.979	54.978	Non
aPKC mut	h10c4	55.101	153.237	84.556	Non
aPKC mut	h10c4	55.101	213.143	84.556	Non
aPKC mut	h10c4	55.101	261.866	84.556	Non
aPKC mut	h10c4	55.101	292.433	84.556	Non
aPKC mut	h10c4	55.101	319.054	84.556	Non
aPKC mut	h10c4	54.859	320.024	84.178	Non
aPKC mut	h10c4	52.8	361.254	81.01	Non
aPKC mut	h10c4	52.8	432.483	81.022	Non
aPKC mut	h10c4	52.8	468.86	81.022	Non
aPKC mut	h10c4	52.8	516.266	81.022	Non
aPKC mut	h10c4	52.8	557.603	81.022	Non
aPKC mut	h10c5	33.485	218.997	51.34	Non
aPKC mut	h10c5	33.485	263.417	51.34	Non
aPKC mut	h10c5	33.485	301.298	51.34	Non
aPKC mut	h10c5	33.485	331.432	51.34	Non
aPKC mut	h10c5	33.485	374.832	51.34	Non
aPKC mut	h10c5	34.453	377.026	52.829	Non
aPKC mut	h10c5	34.453	417.509	52.829	Non
aPKC mut	h10c5	34.453	457.712	52.829	Non
aPKC mut	h10c5	34.453	478.581	52.829	Non
aPKC mut	h10c5	34.393	504.412	52.731	Non
aPKC mut	h10c5	34.393	531.067	52.731	Non
aPKC mut	h10c6	50.439	207.024	77.397	Non
aPKC mut	h10c6	50.439	262.548	77.397	Non
aPKC mut	h10c6	50.439	311.801	77.397	Non
aPKC mut	h10c6	50.439	355.174	77.397	Non
aPKC mut	h10c6	50.439	414.422	77.397	Non
aPKC mut	h10c6	50.439	457.065	77.397	Non
aPKC mut	h10c6	51.226	564.925	78.596	Non
aPKC mut	h10c6	51.226	606.132	78.596	Non
aPKC mut	h10c6	51.226	606.243	78.596	Non
aPKC mut	h10c6	51.226	558.542	78.596	Non
aPKC mut	h10c6	51.226	464.348	78.596	Non
aPKC mut	h11c1	41.719	288.802	63.999	Non
aPKC mut	h11c1	41.719	347.409	63.999	Non
aPKC mut	h11c1	41.719	388.594	63.999	Non
aPKC mut	h11c1	41.719	374.003	63.999	Non
aPKC mut	h11c1	41.538	382.864	63.71	Non
aPKC mut	h11c1	41.538	389.522	63.71	Non
aPKC mut	h11c1	41.538	395.661	63.71	Non
aPKC mut	h11c1	41.538	384.847	63.71	Non
aPKC mut	h11c1	41.659	461.223	63.899	Non
aPKC mut	h11c1	41.356	437.776	63.439	Non
aPKC mut	h11c1	41.356	450.659	63.439	Non
aPKC mut	h11c1	41.356	469.421	63.439	Non
aPKC mut	h11c1	41.356	471.954	63.439	Non
aPKC mut	h11c1	41.356	490.624	63.439	Non
aPKC mut	h11c1	41.356	516.132	63.439	Non
aPKC mut	h11c1	41.719	550.862	63.99	Non
aPKC mut	h11c1	41.719	537.718	63.99	Non
aPKC mut	h11c1	41.719	487.382	63.99	Non
aPKC mut	h11c1	41.719	463.124	63.99	Non
aPKC mut	h11c1	41.719	432.46	63.99	Non
aPKC mut	h11c1	41.175	381.432	63.161	Non
aPKC mut	h11c1	38.268	403.154	58.695	Non
aPKC mut	h11c1	38.268	405.848	58.695	Non
aPKC mut	h11c2	43.294	424.819	66.418	Non
aPKC mut	h11c2	43.294	453.328	66.418	Non
aPKC mut	h11c2	43.294	455.364	66.418	Non
aPKC mut	h11c2	43.294	443.826	66.418	Non
aPKC mut	h11c2	43.294	441.138	66.418	Non
aPKC mut	h11c2	43.536	455.709	66.783	Non
aPKC mut	h11c2	42.809	548.548	65.662	Non
aPKC mut	h11c2	42.809	579.041	65.662	Non
aPKC mut	h11c2	42.809	551.503	65.662	Non
aPKC mut	h11c2	42.809	534.495	65.662	Non
aPKC mut	h11c2	42.809	498.783	65.662	Non
aPKC mut	h11c2	43.173	502.792	66.229	Non
aPKC mut	h11c2	43.173	477.944	66.229	Non
aPKC mut	h11c2	43.657	478.085	66.968	Non
aPKC mut	h11c2	43.657	490.196	66.968	Non
aPKC mut	h11c2	43.657	509.568	66.968	Non
aPKC mut	h11c2	43.657	485.746	66.968	Non
aPKC mut	h11c2	43.657	448.955	66.968	Non
aPKC mut	h11c2	43.657	409.894	66.968	Non
aPKC mut	h11c2	44.141	398.727	67.724	Non
aPKC mut	h11c2	44.141	382.438	67.724	Non
aPKC mut	h11c3	43.052	351.285	66.042	Non
aPKC mut	h11c3	43.052	419.658	66.042	Non
aPKC mut	h11c3	43.052	437.702	66.042	Non
aPKC mut	h11c3	43.052	412.304	66.042	Non
aPKC mut	h11c3	43.052	381.422	66.042	Non
aPKC mut	h11c3	42.93	398.078	65.861	Non
aPKC mut	h11c3	42.93	376.921	65.861	Non
aPKC mut	h11c3	42.93	360.108	65.861	Non
aPKC mut	h11c3	42.93	350.759	65.861	Non
aPKC mut	h11c3	42.93	336.331	65.861	Non
aPKC mut	h11c3	42.93	327.993	65.861	Non
aPKC mut	h11c3	42.93	346.568	65.862	Non
aPKC mut	h11c3	42.93	342.291	65.862	Non
aPKC mut	h11c3	42.87	384.266	65.763	Non
aPKC mut	h11c3	42.87	388.296	65.763	Non
aPKC mut	h11c3	42.87	403.66	65.763	Non
aPKC mut	h11c3	42.87	405.915	65.763	Non
aPKC mut	h11c3	42.87	387.938	65.763	Non
aPKC mut	h11c3	42.87	364.302	65.763	Non
aPKC mut	h11c3	42.87	328.309	65.763	Non
aPKC mut	h11c3	37.844	343.052	58.063	Non
aPKC mut	h11c3	37.844	346.829	58.063	Non
aPKC mut	h11c4	55.041	160.712	84.47	Non
aPKC mut	h11c4	55.041	186.2	84.47	Non
aPKC mut	h11c4	55.041	203.195	84.47	Non
aPKC mut	h11c4	55.041	197.386	84.47	Non
aPKC mut	h11c4	55.041	190.423	84.47	Non
aPKC mut	h11c4	54.92	197.386	84.253	Non
aPKC mut	h11c4	54.92	196.917	84.253	Non
aPKC mut	h11c4	54.92	192.334	84.253	Non
aPKC mut	h11c4	54.92	196.825	84.253	Non
aPKC mut	h11c4	54.92	202.277	84.253	Non
aPKC mut	h11c4	54.92	211.061	84.253	Non
aPKC mut	h11c4	54.92	223.843	84.253	Non
aPKC mut	h11c4	53.224	234.047	81.662	Non
aPKC mut	h11c4	53.224	241.456	81.662	Non
aPKC mut	h11c4	53.224	246.518	81.662	Non
aPKC mut	h11c4	53.224	261.851	81.662	Non
aPKC mut	h11c4	53.224	278.973	81.662	Non
aPKC mut	h11c4	49.288	275.44	75.616	Non
aPKC mut	h11c4	49.288	285.091	75.616	Non
aPKC mut	h11c5	37.663	301.679	57.759	Non
aPKC mut	h11c5	37.663	330.821	57.759	Non
aPKC mut	h11c5	37.602	372.426	57.671	Non
aPKC mut	h11c5	37.602	364.54	57.671	Non
aPKC mut	h11c5	37.602	357.838	57.671	Non
aPKC mut	h11c5	37.602	345.867	57.671	Non
aPKC mut	h11c5	37.905	376.777	58.133	Non
aPKC mut	h11c5	37.905	355.3	58.133	Non
aPKC mut	h11c5	37.905	365.608	58.133	Non
aPKC mut	h11c5	38.329	420.805	58.783	Non
aPKC mut	h11c5	38.329	436.621	58.783	Non
aPKC mut	h11c5	38.329	438.712	58.783	Non
aPKC mut	h11c5	38.329	441.58	58.783	Non
aPKC mut	h11c5	38.329	445.5	58.783	Non
aPKC mut	h11c5	38.329	442.094	58.783	Non
aPKC mut	h11c5	38.329	432.044	58.783	Non
aPKC mut	h11c5	38.51	467.461	59.061	Non
aPKC mut	h11c5	38.51	465.778	59.061	Non
aPKC mut	h11c5	38.51	459.266	59.061	Non
aPKC mut	h11c5	38.51	439.654	59.061	Non
aPKC mut	h11c5	40.569	444.059	62.226	Non
aPKC mut	h11c5	40.569	413.822	62.226	Non
aPKC mut	h11c5	37.299	349.524	57.198	Non
aPKC mut	h11c5	37.299	321.915	57.198	Non
aPKC mut	h11c5	37.299	301.794	57.198	Non
aPKC mut	h11c5	37.299	285.006	57.198	Non
aPKC mut	h12c1	34.453	348.461	52.835	Non
aPKC mut	h12c1	34.453	471.185	52.835	Non
[truncated: 1,357 more rows]
