# Supplementary material for: Stepwise polarisation of developing bilayered epidermis is mediated by aPKC and E-cadherin in zebrafish
Source: eLife. 2020 Jan 22;9:e49064. doi: 10.7554/eLife.49064 (PMC6975926; doi:10.7554/eLife.49064)
Supplement: Figure 2—source data 2. [file elife-49064-fig2-data2.csv]

Genotype	Cell name	Area	Mean	Length	Boundary
aPKC sib	h1c1	48.955	407.049	79.52	Non
aPKC sib	h1c1	48.955	399.348	79.52	Non
aPKC sib	h1c1	48.955	321.565	79.52	Non
aPKC sib	h1c1	48.955	229.416	79.52	Non
aPKC sib	h1c2	48.955	229.416	79.52	Non
aPKC sib	h1c2	43.227	377.953	70.208	Non
aPKC sib	h1c2	43.227	419.552	70.208	Non
aPKC sib	h1c2	41.985	457.195	68.178	Non
aPKC sib	h1c2	41.985	418.006	68.178	Non
aPKC sib	h1c2	41.985	351.852	68.178	Non
aPKC sib	h1c2	41.985	289.428	68.178	Non
aPKC sib	h1c3	42.687	377.03	69.327	Non
aPKC sib	h1c3	42.687	391.683	69.327	Non
aPKC sib	h1c3	43.66	488.126	70.906	Non
aPKC sib	h1c3	43.66	452.883	70.906	Non
aPKC sib	h1c3	43.66	412.986	70.906	Non
aPKC sib	h1c3	43.66	376.507	70.906	Non
aPKC sib	h1c4	27.666	370.817	44.888	Non
aPKC sib	h1c4	29.503	422.922	47.878	Non
aPKC sib	h1c4	30.962	387.2	50.27	Non
aPKC sib	h1c4	34.744	480.42	56.411	Non
aPKC sib	h1c4	34.744	478.666	56.411	Non
aPKC sib	h1c4	34.852	430.094	56.591	Non
aPKC sib	h1c4	34.852	364.146	56.591	Non
aPKC sib	h1c4	34.852	285.387	56.591	Non
aPKC sib	h2c1	39.499	597.199	64.137	Non
aPKC sib	h2c1	39.499	654.935	64.137	Non
aPKC sib	h2c1	39.499	617.65	64.137	Non
aPKC sib	h2c1	39.499	563	64.137	Non
aPKC sib	h2c1	39.499	535.717	64.137	Non
aPKC sib	h2c1	39.499	437.134	64.137	Non
aPKC sib	h2c1	39.499	353.639	64.137	Non
aPKC sib	h2c2	37.284	484.158	60.533	Non
aPKC sib	h2c2	37.284	498.997	60.533	Non
aPKC sib	h2c2	37.284	476.253	60.533	Non
aPKC sib	h2c2	37.284	448.961	60.533	Non
aPKC sib	h2c2	37.284	400.021	60.533	Non
aPKC sib	h2c2	37.284	337.112	60.533	Non
aPKC sib	h2c2	37.284	290.632	60.533	Non
aPKC sib	h2c2	36.527	327.861	59.312	Non
aPKC sib	h2c2	36.527	311.471	59.312	Non
aPKC sib	h2c2	36.527	292.449	59.312	Non
aPKC sib	h2c2	36.527	271.927	59.312	Non
aPKC sib	h2c3	36.257	447.455	58.856	Non
aPKC sib	h2c3	36.257	477.585	58.856	Non
aPKC sib	h2c3	36.257	464.256	58.856	Non
aPKC sib	h2c3	36.257	461.261	58.856	Non
aPKC sib	h2c3	36.257	398.221	58.856	Non
aPKC sib	h2c3	36.257	324.76	58.856	Non
aPKC sib	h2c3	36.257	275.841	58.856	Non
aPKC sib	h2c3	36.257	244.384	58.856	Non
aPKC sib	h2c4	38.634	429.596	62.747	Non
aPKC sib	h2c4	38.634	426.816	62.747	Non
aPKC sib	h2c4	38.634	420.927	62.747	Non
aPKC sib	h2c4	38.634	413.705	62.747	Non
aPKC sib	h2c4	38.634	381.566	62.747	Non
aPKC sib	h2c4	39.607	417.97	64.312	Non
aPKC sib	h2c4	39.607	399.626	64.312	Non
aPKC sib	h2c4	39.607	374.972	64.312	Non
aPKC sib	h2c4	39.607	333.761	64.312	Non
aPKC sib	h2c4	39.607	293.203	64.312	Non
aPKC sib	h2c5	29.773	407.944	48.331	Non
aPKC sib	h2c5	29.773	380.24	48.331	Non
aPKC sib	h2c5	38.797	477.69	63.003	Non
aPKC sib	h2c5	38.797	490.493	63.003	Non
aPKC sib	h2c5	38.797	494.475	63.003	Non
aPKC sib	h2c5	37.824	494.903	61.418	Non
aPKC sib	h2c5	37.824	473.526	61.418	Non
aPKC sib	h2c5	37.824	424.272	61.418	Non
aPKC sib	h2c5	37.824	356.64	61.418	Non
aPKC sib	h2c5	37.824	304.948	61.418	Non
aPKC sib	h3c1	37.446	537.076	60.788	Non
aPKC sib	h3c1	37.446	533.475	60.788	Non
aPKC sib	h3c1	37.446	502.421	60.788	Non
aPKC sib	h3c1	37.446	446.273	60.788	Non
aPKC sib	h3c1	37.446	379.424	60.788	Non
aPKC sib	h3c1	37.446	311.098	60.788	Non
aPKC sib	h3c2	37.662	507.144	61.159	Non
aPKC sib	h3c2	37.662	498.528	61.159	Non
aPKC sib	h3c2	37.662	455.156	61.159	Non
aPKC sib	h3c2	37.662	362.509	61.159	Non
aPKC sib	h3c2	37.662	269.477	61.159	Non
aPKC sib	h3c3	47.01	392.47	76.354	Non
aPKC sib	h3c3	47.01	403.726	76.354	Non
aPKC sib	h3c3	47.01	373.539	76.354	Non
aPKC sib	h3c3	47.01	334.024	76.354	Non
aPKC sib	h3c3	47.01	275.628	76.354	Non
aPKC sib	h3c3	47.01	214.435	76.354	Non
aPKC sib	h3c4	46.632	457.913	75.742	Non
aPKC sib	h3c4	47.658	494.396	77.415	Non
aPKC sib	h3c4	47.658	446.416	77.415	Non
aPKC sib	h3c4	47.658	379.806	77.415	Non
aPKC sib	h3c4	45.551	373.051	73.993	Non
aPKC sib	h3c4	45.551	300.077	73.993	Non
aPKC sib	h3c4	45.551	232.216	73.993	Non
aPKC sib	h3c4	45.551	184.213	73.993	Non
aPKC sib	h4c1	42.309	375.844	68.711	Non
aPKC sib	h4c1	42.309	385.316	68.711	Non
aPKC sib	h4c1	42.309	385.316	68.711	Non
aPKC sib	h4c1	40.526	436.339	65.807	Non
aPKC sib	h4c1	40.526	417.335	65.807	Non
aPKC sib	h4c1	40.526	389.488	65.807	Non
aPKC sib	h4c1	40.526	353.832	65.807	Non
aPKC sib	h4c1	40.526	316.502	65.807	Non
aPKC sib	h4c1	40.526	300.551	65.807	Non
aPKC sib	h4c2	36.203	416.785	58.784	Non
aPKC sib	h4c2	36.203	429.108	58.784	Non
aPKC sib	h4c2	36.203	418.441	58.784	Non
aPKC sib	h4c2	38.256	437.705	62.13	Non
aPKC sib	h4c2	38.256	404.974	62.13	Non
aPKC sib	h4c2	38.256	360.738	62.13	Non
aPKC sib	h4c2	38.256	305.299	62.13	Non
aPKC sib	h4c2	38.256	279.064	62.13	Non
aPKC sib	h4c2	38.256	279.064	62.13	Non
aPKC sib	h4c3	31.448	474.713	51.056	Non
aPKC sib	h4c3	31.448	466.924	51.056	Non
aPKC sib	h4c3	45.281	492.361	73.533	Non
aPKC sib	h4c3	45.281	460.755	73.533	Non
aPKC sib	h4c3	45.281	414.143	73.533	Non
aPKC sib	h4c3	45.281	333.447	73.533	Non
aPKC sib	h4c3	45.281	285.386	73.533	Non
aPKC sib	h4c3	45.281	236.381	73.533	Non
aPKC sib	h4c4	45.227	413.403	73.463	Non
aPKC sib	h4c4	45.227	418.083	73.463	Non
aPKC sib	h4c4	45.227	399.837	73.463	Non
aPKC sib	h4c4	45.227	344.728	73.463	Non
aPKC sib	h4c4	45.227	278.536	73.463	Non
aPKC sib	h4c4	45.227	201.229	73.463	Non
aPKC sib	h5c1	55.493	542.255	90.176	Non
aPKC sib	h5c1	53.926	486.234	87.597	Non
aPKC sib	h5c1	50.738	454.559	82.41	Non
aPKC sib	h5c1	50.738	412.196	82.41	Non
aPKC sib	h5c1	46.74	395.931	75.907	Non
aPKC sib	h5c1	46.74	354.116	75.907	Non
aPKC sib	h5c1	46.74	299.705	75.907	Non
aPKC sib	h5c1	46.74	265.24	75.907	Non
aPKC sib	h5c1	46.74	228.553	75.907	Non
aPKC sib	h5c2	51.657	412.623	83.909	Non
aPKC sib	h5c2	51.657	414.701	83.909	Non
aPKC sib	h5c2	51.657	396.66	83.909	Non
aPKC sib	h5c2	52.251	423.332	84.877	Non
aPKC sib	h5c2	52.251	398.766	84.877	Non
aPKC sib	h5c2	52.251	376.168	84.877	Non
aPKC sib	h5c2	52.251	343.201	84.877	Non
aPKC sib	h5c3	49.928	516.791	81.094	Non
aPKC sib	h5c3	49.928	555.548	81.094	Non
aPKC sib	h5c3	49.928	580.32	81.094	Non
aPKC sib	h5c3	49.928	545.809	81.094	Non
aPKC sib	h5c3	49.928	474.548	81.094	Non
aPKC sib	h5c3	49.928	406.857	81.094	Non
aPKC sib	h5c3	49.928	344.218	81.094	Non
aPKC sib	h5c4	36.365	432.531	59.041	Non
aPKC sib	h5c4	36.365	444.566	59.041	Non
aPKC sib	h5c4	36.365	419.53	59.041	Non
aPKC sib	h5c4	36.365	372.021	59.041	Non
aPKC sib	h5c4	40.526	475.526	65.819	Non
aPKC sib	h5c4	40.526	418.312	65.819	Non
aPKC sib	h5c4	40.526	339.137	65.819	Non
aPKC sib	h5c4	40.526	267.636	65.819	Non
aPKC sib	h5c4	40.526	267.636	65.819	Non
aPKC sib	h6c1	36.041	346.202	58.528	Non
aPKC sib	h6c1	36.041	370.445	58.528	Non
aPKC sib	h6c1	41.822	291.85	67.925	Non
aPKC sib	h6c1	41.822	281.374	67.925	Non
aPKC sib	h6c1	41.822	265.087	67.925	Non
aPKC sib	h6c1	41.822	226.537	67.925	Non
aPKC sib	h6c1	41.822	184.932	67.925	Non
aPKC sib	h6c2	41.174	353.866	66.871	Non
aPKC sib	h6c2	41.174	352.89	66.871	Non
aPKC sib	h6c2	41.174	344.519	66.871	Non
aPKC sib	h6c2	41.174	314.02	66.871	Non
aPKC sib	h6c2	41.174	264.214	66.871	Non
aPKC sib	h6c2	41.174	224.824	66.871	Non
aPKC sib	h6c2	41.174	193.644	66.871	Non
aPKC sib	h6c3	43.606	320.013	70.805	Non
aPKC sib	h6c3	43.606	311.848	70.805	Non
aPKC sib	h6c3	43.606	294.192	70.805	Non
aPKC sib	h6c3	40.201	385.325	65.295	Non
aPKC sib	h6c3	40.201	372.774	65.295	Non
aPKC sib	h6c3	40.201	334.091	65.295	Non
aPKC sib	h6c3	40.201	304.632	65.295	Non
aPKC sib	h6c3	40.201	280.084	65.295	Non
aPKC sib	h6c3	40.201	265.41	65.295	Non
aPKC sib	h6c4	37.77	379.892	61.332	Non
aPKC sib	h6c4	37.77	397.633	61.332	Non
aPKC sib	h6c4	37.77	393.244	61.332	Non
aPKC sib	h6c4	37.77	362.653	61.332	Non
aPKC sib	h6c4	37.77	320.01	61.332	Non
aPKC sib	h6c4	38.797	416.77	63.005	Non
aPKC sib	h6c4	38.797	372.19	63.005	Non
aPKC sib	h6c4	38.797	344.004	63.005	Non
aPKC sib	h6c4	38.797	296.994	63.005	Non
aPKC sib	h6c4	38.797	253.387	63.005	Non
aPKC sib	h7c1	42.579	455.447	69.141	Non
aPKC sib	h7c1	42.579	474.05	69.141	Non
aPKC sib	h7c1	42.579	473.114	69.141	Non
aPKC sib	h7c1	42.579	461.431	69.141	Non
aPKC sib	h7c1	42.579	441.217	69.141	Non
aPKC sib	h7c1	42.579	424.106	69.141	Non
aPKC sib	h7c1	42.579	398.611	69.141	Non
aPKC sib	h7c2	40.147	351.595	65.198	Non
aPKC sib	h7c2	40.147	404.936	65.198	Non
aPKC sib	h7c2	40.147	403.071	65.198	Non
aPKC sib	h7c2	40.147	389.849	65.198	Non
aPKC sib	h7c2	40.147	371.386	65.198	Non
aPKC sib	h7c2	40.147	308.228	65.198	Non
aPKC sib	h7c2	41.66	360.461	67.65	Non
aPKC sib	h7c3	41.66	362.449	67.65	Non
aPKC sib	h7c3	41.66	343.851	67.65	Non
aPKC sib	h7c3	41.66	314.729	67.65	Non
aPKC sib	h7c3	41.66	284.124	67.65	Non
aPKC sib	h7c3	41.66	246.887	67.65	Non
aPKC sib	h7c4	47.712	329.24	77.504	Non
aPKC sib	h7c4	47.712	357.611	77.504	Non
aPKC sib	h7c4	47.712	381.016	77.504	Non
aPKC sib	h7c4	50.144	397.65	81.449	Non
aPKC sib	h7c4	50.144	386.761	81.449	Non
aPKC sib	h7c4	50.144	358.244	81.449	Non
aPKC sib	h7c4	50.144	331.19	81.449	Non
aPKC sib	h7c4	50.144	305.593	81.449	Non
aPKC sib	h7c4	50.144	276.566	81.449	Non
aPKC sib	h7c4	50.144	248.855	81.449	Non
aPKC sib	h7c5	33.015	459.194	53.593	Non
aPKC sib	h7c5	33.015	474.631	53.593	Non
aPKC sib	h7c5	33.015	485.787	53.593	Non
aPKC sib	h7c5	35.446	468.252	57.552	Non
aPKC sib	h7c5	35.446	440.155	57.552	Non
aPKC sib	h7c5	35.446	388.828	57.552	Non
aPKC sib	h7c5	35.446	352.693	57.552	Non
aPKC sib	h7c5	35.446	300.297	57.552	Non
aPKC sib	h7c5	35.446	267.67	57.552	Non
aPKC sib	h8c1	41.985	326.504	68.179	Non
aPKC sib	h8c1	55.439	355.399	90.061	Non
aPKC sib	h8c1	55.439	368.303	90.061	Non
aPKC sib	h8c1	55.439	370.448	90.061	Non
aPKC sib	h8c1	55.439	360.807	90.061	Non
aPKC sib	h8c2	47.928	385.894	77.862	Non
aPKC sib	h8c2	47.928	352.064	77.862	Non
aPKC sib	h8c2	47.928	300.184	77.862	Non
aPKC sib	h8c2	47.928	241.617	77.862	Non
aPKC sib	h8c2	47.928	210.219	77.862	Non
aPKC sib	h8c3	59.6	353.604	96.825	Non
aPKC sib	h8c3	59.6	364.746	96.825	Non
aPKC sib	h8c3	59.6	358.223	96.825	Non
aPKC sib	h8c3	59.6	328.41	96.825	Non
aPKC sib	h8c3	59.6	283.943	96.825	Non
aPKC sib	h8c3	59.6	250.809	96.825	Non
aPKC sib	h9c1	44.146	661.605	71.701	Non
aPKC sib	h9c1	44.146	702.49	71.701	Non
aPKC sib	h9c1	43.443	612.654	70.561	Non
aPKC sib	h9c1	43.443	529.914	70.561	Non
aPKC sib	h9c1	43.443	465.549	70.561	Non
aPKC sib	h9c1	43.443	374.892	70.561	Non
aPKC sib	h9c1	43.443	278.814	70.561	Non
aPKC sib	h9c1	43.443	214.515	70.561	Non
aPKC sib	h9c2	38.688	604.543	62.824	Non
aPKC sib	h9c2	38.688	601.774	62.824	Non
aPKC sib	h9c2	39.553	634.388	64.228	Non
aPKC sib	h9c2	39.553	592.151	64.228	Non
aPKC sib	h9c2	39.553	519.871	64.228	Non
aPKC sib	h9c2	32.421	553.804	52.632	Non
aPKC sib	h9c2	32.421	538.875	52.632	Non
aPKC sib	h9c2	32.421	498.825	52.632	Non
aPKC sib	h9c2	32.421	442.053	52.632	Non
aPKC sib	h9c3	30.205	641.621	49.041	Non
aPKC sib	h9c3	30.205	673.805	49.041	Non
aPKC sib	h9c3	30.205	683.567	49.041	Non
aPKC sib	h9c3	32.421	574.065	52.627	Non
aPKC sib	h9c3	32.421	554.837	52.627	Non
aPKC sib	h9c3	32.421	525.976	52.627	Non
aPKC sib	h9c3	32.421	511.316	52.627	Non
aPKC sib	h9c3	32.421	494.926	52.627	Non
aPKC sib	h9c3	32.421	467.529	52.627	Non
aPKC sib	h9c3	32.421	462.237	52.627	Non
aPKC sib	h9c4	42.687	713.056	69.332	Non
aPKC sib	h9c4	42.687	745.991	69.332	Non
aPKC sib	h9c4	42.687	730.021	69.332	Non
aPKC sib	h9c4	42.687	691.578	69.332	Non
aPKC sib	h9c4	42.687	661.043	69.332	Non
aPKC sib	h9c4	42.687	631.933	69.332	Non
aPKC sib	h9c4	42.687	570.186	69.332	Non
aPKC sib	h9c4	42.687	509.151	69.332	Non
aPKC sib	h10c1	43.984	409.934	71.433	Non
aPKC sib	h10c1	43.984	445.228	71.433	Non
aPKC sib	h10c1	43.984	431.037	71.433	Non
aPKC sib	h10c1	44.47	429.858	72.232	Non
aPKC sib	h10c1	44.47	379.903	72.232	Non
aPKC sib	h10c1	44.47	315.558	72.232	Non
aPKC sib	h10c1	44.47	251.824	72.232	Non
aPKC sib	h10c1	44.47	207.115	72.232	Non
aPKC sib	h10c2	45.335	343.441	73.637	Non
aPKC sib	h10c2	45.335	368.656	73.637	Non
aPKC sib	h10c2	45.335	370.061	73.637	Non
aPKC sib	h10c2	45.335	340.485	73.637	Non
aPKC sib	h10c2	46.902	337.625	76.181	Non
aPKC sib	h10c2	46.902	269.798	76.181	Non
aPKC sib	h10c2	46.902	206.09	76.181	Non
aPKC sib	h10c2	46.902	163.831	76.181	Non
aPKC sib	h10c3	50.738	374.878	82.416	Non
aPKC sib	h10c3	36.959	453.549	60.014	Non
aPKC sib	h10c3	41.606	437.276	67.575	Non
aPKC sib	h10c3	50.036	371.284	81.276	Non
aPKC sib	h10c3	50.036	370.696	81.276	Non
aPKC sib	h10c3	50.036	343.059	81.276	Non
aPKC sib	h10c3	50.036	289.934	81.276	Non
aPKC sib	h10c3	50.036	228.464	81.276	Non
aPKC sib	h10c3	50.036	206.863	81.276	Non
aPKC mut	h1c1	40.58	249.329	65.903	Non
aPKC mut	h1c1	40.58	242.837	65.903	Non
aPKC mut	h1c1	41.552	260.348	67.481	Non
aPKC mut	h1c1	41.552	244.933	67.481	Non
aPKC mut	h1c1	41.552	225.018	67.481	Non
aPKC mut	h1c1	41.552	178.938	67.481	Non
aPKC mut	h1c2	49.657	273.381	80.675	Non
aPKC mut	h1c2	49.657	258.94	80.675	Non
aPKC mut	h1c2	49.657	238.839	80.675	Non
aPKC mut	h1c2	50.684	192.259	82.325	Non
aPKC mut	h1c2	50.684	169.72	82.325	Non
aPKC mut	h1c2	50.684	149.049	82.325	Non
aPKC mut	h1c2	50.684	139.243	82.325	Non
aPKC mut	h1c3	39.769	284.173	64.59	Non
aPKC mut	h1c3	39.769	280.627	64.59	Non
aPKC mut	h1c3	39.769	270.695	64.59	Non
aPKC mut	h1c3	39.769	252.884	64.59	Non
aPKC mut	h1c3	39.769	227.727	64.59	Non
aPKC mut	h1c3	39.769	216.225	64.59	Non
aPKC mut	h1c3	39.769	198.477	64.59	Non
aPKC mut	h1c4	40.904	363.978	66.428	Non
aPKC mut	h1c4	40.904	355.525	66.428	Non
aPKC mut	h1c4	40.904	332.977	66.428	Non
aPKC mut	h1c4	40.904	284.691	66.428	Non
aPKC mut	h2c1	32.637	528.241	52.989	Non
aPKC mut	h2c1	32.637	431.19	52.989	Non
aPKC mut	h2c1	32.637	379.824	52.989	Non
aPKC mut	h2c1	32.637	287.205	52.989	Non
aPKC mut	h2c2	47.766	362.686	77.582	Non
aPKC mut	h2c2	47.766	346.37	77.582	Non
aPKC mut	h2c2	47.766	316.137	77.582	Non
aPKC mut	h2c2	43.389	327.764	70.468	Non
aPKC mut	h2c2	43.389	303.628	70.468	Non
aPKC mut	h2c2	43.389	264.066	70.468	Non
aPKC mut	h2c2	43.389	219.693	70.468	Non
aPKC mut	h2c3	43.227	429.718	70.204	Non
aPKC mut	h2c3	43.227	371.511	70.204	Non
aPKC mut	h2c3	43.227	312.259	70.204	Non
aPKC mut	h2c3	43.227	277.449	70.204	Non
aPKC mut	h2c3	43.227	219.459	70.204	Non
aPKC mut	h2c4	42.471	420.557	68.96	Non
aPKC mut	h2c4	42.471	422.027	68.96	Non
aPKC mut	h2c4	42.471	400.848	68.96	Non
aPKC mut	h2c4	43.173	418.176	70.116	Non
aPKC mut	h2c4	43.173	378.348	70.116	Non
aPKC mut	h2c4	43.173	322.168	70.116	Non
aPKC mut	h2c4	43.173	250.347	70.116	Non
aPKC mut	h3c1	62.41	252.774	101.394	Non
aPKC mut	h3c1	62.41	236.859	101.394	Non
aPKC mut	h3c1	62.41	218.99	101.394	Non
aPKC mut	h3c1	62.41	202.344	101.394	Non
aPKC mut	h3c2	48.523	274.393	78.816	Non
aPKC mut	h3c2	48.523	299.513	78.816	Non
aPKC mut	h3c2	48.523	298.211	78.816	Non
aPKC mut	h3c2	48.523	284.299	78.816	Non
aPKC mut	h3c2	49.387	260.138	80.215	Non
aPKC mut	h3c2	49.387	219.212	80.215	Non
aPKC mut	h3c2	49.387	172.109	80.215	Non
aPKC mut	h4c1	48.361	422.535	78.559	Non
aPKC mut	h4c1	48.361	429.04	78.559	Non
aPKC mut	h4c1	48.361	402.345	78.559	Non
aPKC mut	h4c1	49.225	378.382	79.95	Non
aPKC mut	h4c1	49.225	295.495	79.95	Non
aPKC mut	h4c1	49.225	208.544	79.95	Non
aPKC mut	h4c2	61.707	379.288	100.224	Non
aPKC mut	h4c2	61.707	363.211	100.224	Non
aPKC mut	h4c2	61.707	319.791	100.224	Non
aPKC mut	h4c2	61.707	246.021	100.224	Non
aPKC mut	h4c2	61.707	177.719	100.224	Non
aPKC mut	h4c3	45.605	443.844	74.088	Non
aPKC mut	h4c3	45.605	483.052	74.088	Non
aPKC mut	h4c3	45.605	470.738	74.088	Non
aPKC mut	h4c3	45.605	402.934	74.088	Non
aPKC mut	h4c3	45.605	307.289	74.088	Non
aPKC mut	h4c3	45.605	224.977	74.088	Non
aPKC mut	h4c4	48.685	447.178	79.082	Non
aPKC mut	h4c4	48.685	434.33	79.082	Non
aPKC mut	h4c4	55.439	423.701	90.059	Non
aPKC mut	h4c4	55.439	378.355	90.059	Non
aPKC mut	h4c4	55.439	302.635	90.059	Non
aPKC mut	h4c4	55.439	218.305	90.059	Non
aPKC mut	h4c4	55.439	162.836	90.059	Non
aPKC mut	h4c5	39.067	356.039	63.437	Non
aPKC mut	h4c5	39.067	370.574	63.437	Non
aPKC mut	h4c5	39.067	355.268	63.437	Non
aPKC mut	h4c5	38.688	336.856	62.818	Non
aPKC mut	h4c5	38.688	254.724	62.818	Non
aPKC mut	h4c5	38.688	181.168	62.818	Non
aPKC mut	h5c1	43.065	463.715	69.952	Non
aPKC mut	h5c1	43.065	370.387	69.952	Non
aPKC mut	h5c1	43.065	267.995	69.952	Non
aPKC mut	h5c1	43.065	175.369	69.952	Non
aPKC mut	h5c1	43.065	121.011	69.952	Non
aPKC mut	h5c2	36.149	479.048	58.682	Non
aPKC mut	h5c2	36.149	416.398	58.682	Non
aPKC mut	h5c2	36.149	311.252	58.682	Non
aPKC mut	h5c2	37.23	261.9	60.449	Non
aPKC mut	h5c2	37.23	166.875	60.449	Non
aPKC mut	h5c2	37.23	114.06	60.449	Non
aPKC mut	h5c3	37.986	418.52	61.669	Non
aPKC mut	h5c3	37.986	418.52	61.669	Non
aPKC mut	h5c3	37.986	369.233	61.669	Non
aPKC mut	h5c3	37.986	276.56	61.669	Non
aPKC mut	h5c3	37.986	188.874	61.669	Non
aPKC mut	h5c3	37.986	140.68	61.669	Non
aPKC mut	h5c4	34.906	516.432	56.676	Non
aPKC mut	h5c4	34.906	447.144	56.676	Non
aPKC mut	h5c4	42.417	414.879	68.879	Non
aPKC mut	h5c4	42.417	354.917	68.879	Non
aPKC mut	h5c4	42.417	261.223	68.879	Non
aPKC mut	h5c4	42.417	182.105	68.879	Non
aPKC mut	h5c4	42.417	140.957	68.879	Non
aPKC mut	h6c1	42.255	468.472	68.638	Non
aPKC mut	h6c1	42.255	499.349	68.638	Non
aPKC mut	h6c1	42.255	489.847	68.638	Non
aPKC mut	h6c1	42.255	451.255	68.638	Non
aPKC mut	h6c1	42.255	360.625	68.638	Non
aPKC mut	h6c1	33.771	210.953	54.823	Non
aPKC mut	h6c2	33.285	434.904	54.027	Non
aPKC mut	h6c2	33.285	479.934	54.027	Non
aPKC mut	h6c2	33.285	486.256	54.027	Non
aPKC mut	h6c2	33.285	460.821	54.027	Non
aPKC mut	h6c2	33.285	408.967	54.027	Non
aPKC mut	h6c2	37.662	417.756	61.152	Non
aPKC mut	h6c2	37.662	382.884	61.152	Non
aPKC mut	h6c2	37.662	334.415	61.152	Non
aPKC mut	h6c3	48.307	399.697	78.467	Non
aPKC mut	h6c3	48.307	358.803	78.467	Non
aPKC mut	h6c3	48.307	310.273	78.467	Non
aPKC mut	h6c3	48.307	259.83	78.467	Non
aPKC mut	h6c3	48.307	198.274	78.467	Non
aPKC mut	h6c3	48.307	164.815	78.467	Non
aPKC mut	h6c4	44.038	372.922	71.532	Non
aPKC mut	h6c4	44.038	376.573	71.532	Non
aPKC mut	h6c4	44.038	362.58	71.532	Non
aPKC mut	h6c4	40.093	379.827	65.103	Non
aPKC mut	h6c4	40.093	328.202	65.103	Non
aPKC mut	h6c4	40.093	268.28	65.103	Non
aPKC mut	h6c4	40.093	227.281	65.103	Non
aPKC mut	h6c5	39.121	348.502	63.528	Non
aPKC mut	h6c5	39.121	344.217	63.528	Non
aPKC mut	h6c5	40.634	329.666	65.984	Non
aPKC mut	h6c5	40.634	279.903	65.984	Non
aPKC mut	h6c5	40.634	238.054	65.984	Non
aPKC mut	h6c5	40.634	198.457	65.984	Non
aPKC mut	h7c1	43.714	409.108	70.996	Non
aPKC mut	h7c1	43.714	338.088	70.996	Non
aPKC mut	h7c1	41.282	271.327	67.043	Non
aPKC mut	h7c1	41.282	224.867	67.043	Non
aPKC mut	h7c1	41.282	176.892	67.043	Non
aPKC mut	h7c2	29.719	334.125	48.237	Non
aPKC mut	h7c2	31.88	360.978	51.756	Non
aPKC mut	h7c2	31.88	320.086	51.756	Non
aPKC mut	h7c2	34.15	318.808	55.432	Non
aPKC mut	h7c2	36.203	329.94	58.793	Non
aPKC mut	h7c2	36.203	319.722	58.793	Non
aPKC mut	h7c3	46.091	339.271	74.865	Non
aPKC mut	h7c3	46.091	335.302	74.865	Non
aPKC mut	h7c3	46.091	310.906	74.865	Non
aPKC mut	h7c3	46.091	275.112	74.865	Non
aPKC mut	h7c4	33.825	384.098	54.925	Non
aPKC mut	h7c4	35.284	470.019	57.29	Non
aPKC mut	h7c4	35.284	502.809	57.29	Non
aPKC mut	h7c4	36.311	486.542	58.953	Non
aPKC mut	h7c4	36.311	427.338	58.953	Non
aPKC mut	h7c4	36.311	350.885	58.953	Non
aPKC mut	h7c4	36.311	230.712	58.953	Non
aPKC mut	h7c4	36.311	173.958	58.953	Non
aPKC mut	h7c5	41.498	354.26	67.397	Non
aPKC mut	h7c5	41.498	336.296	67.397	Non
aPKC mut	h7c5	41.498	309.392	67.397	Non
aPKC mut	h7c5	41.498	266.471	67.397	Non
aPKC mut	h7c5	41.498	214.075	67.397	Non
aPKC mut	h7c5	41.498	159.009	67.397	Non
aPKC mut	h8c1	40.039	325.929	65.035	Non
aPKC mut	h8c1	40.039	306.595	65.035	Non
aPKC mut	h8c1	40.039	261.925	65.035	Non
aPKC mut	h8c1	40.039	220.244	65.035	Non
aPKC mut	h8c1	40.039	193.613	65.035	Non
aPKC mut	h8c2	36.041	438.858	58.512	Non
aPKC mut	h8c2	36.041	440.19	58.512	Non
aPKC mut	h8c2	36.041	406.288	58.512	Non
aPKC mut	h8c2	36.041	325.286	58.512	Non
aPKC mut	h8c2	36.041	232.308	58.512	Non
aPKC mut	h8c2	36.041	189.734	58.512	Non
aPKC mut	h8c3	32.475	338.851	52.716	Non
aPKC mut	h8c3	32.475	338.851	52.716	Non
aPKC mut	h8c3	32.475	343.658	52.716	Non
aPKC mut	h8c3	32.475	307.125	52.716	Non
aPKC mut	h8c3	32.475	264.384	52.716	Non
aPKC mut	h8c3	32.475	229.578	52.716	Non
aPKC mut	h8c4	51.657	357.914	83.915	Non
aPKC mut	h8c4	51.657	356.997	83.915	Non
aPKC mut	h8c4	51.657	340.691	83.915	Non
aPKC mut	h8c4	51.657	292.356	83.915	Non
aPKC mut	h8c4	52.305	316.529	84.959	Non
aPKC mut	h8c4	52.305	266.837	84.959	Non
aPKC mut	h8c4	52.305	226.601	84.959	Non
aPKC mut	h8c4	52.305	196.763	84.959	Non
aPKC mut	h8c4	52.305	163.067	84.959	Non
aPKC mut	h8c5	31.61	266.018	51.307	Non
aPKC mut	h8c5	31.61	273.877	51.307	Non
aPKC mut	h8c5	31.61	267.676	51.307	Non
aPKC mut	h8c5	34.852	321.295	56.583	Non
aPKC mut	h8c5	34.852	301.461	56.583	Non
aPKC mut	h8c5	34.852	279.754	56.583	Non
aPKC mut	h8c5	34.852	250.229	56.583	Non
aPKC mut	h8c5	34.852	211.316	56.583	Non
aPKC mut	h8c5	34.852	175.511	56.583	Non
aPKC mut	h9c1	38.797	525.931	62.998	Non
aPKC mut	h9c1	38.797	460.167	62.998	Non
aPKC mut	h9c1	38.797	391.484	62.998	Non
aPKC mut	h9c2	37.554	711.605	60.981	Non
aPKC mut	h9c2	37.554	702.825	60.981	Non
aPKC mut	h9c2	39.121	743.745	63.52	Non
aPKC mut	h9c2	39.121	673.063	63.52	Non
aPKC mut	h9c2	39.121	564.216	63.52	Non
aPKC mut	h9c2	39.121	448.747	63.52	Non
aPKC mut	h9c2	39.121	316.356	63.52	Non
aPKC mut	h9c3	39.985	625.09	64.932	Non
aPKC mut	h9c3	39.985	627.481	64.932	Non
aPKC mut	h9c3	39.985	646.614	64.932	Non
aPKC mut	h9c3	39.985	609.933	64.932	Non
aPKC mut	h9c3	39.985	533.98	64.932	Non
aPKC mut	h9c3	39.985	446.17	64.932	Non
aPKC mut	h9c4	34.798	551.113	56.491	Non
aPKC mut	h9c4	34.798	543.563	56.491	Non
aPKC mut	h9c4	34.798	532.826	56.491	Non
aPKC mut	h9c4	34.798	469.374	56.491	Non
aPKC mut	h9c4	34.798	390.623	56.491	Non
aPKC mut	h9c4	34.798	308.598	56.491	Non
aPKC mut	h9c5	38.094	610.901	61.847	Non
aPKC mut	h9c5	38.094	626.857	61.847	Non
aPKC mut	h9c5	38.094	616.254	61.847	Non
aPKC mut	h9c5	38.094	521.56	61.847	Non
aPKC mut	h9c5	38.094	424.834	61.847	Non
aPKC mut	h9c5	38.094	343.25	61.847	Non
aPKC mut	h9c5	38.094	240.96	61.847	Non
aPKC mut	h9c6	39.283	571.036	63.791	Non
aPKC mut	h9c6	39.283	578.44	63.791	Non
aPKC mut	h9c6	39.283	633.402	63.791	Non
aPKC mut	h9c6	39.283	627.047	63.791	Non
aPKC mut	h9c6	39.283	568.089	63.791	Non
aPKC mut	h9c6	39.283	432.742	63.791	Non
aPKC mut	h9c6	39.283	321.038	63.791	Non
aPKC mut	h9c6	39.283	250.216	63.791	Non
aPKC mut	h10c1	41.768	315.534	67.826	Non
aPKC mut	h10c1	41.768	299.006	67.826	Non
aPKC mut	h10c1	41.768	275.341	67.826	Non
aPKC mut	h10c1	41.768	241.914	67.826	Non
aPKC mut	h10c1	41.768	201.731	67.826	Non
aPKC mut	h10c2	39.823	316.396	64.668	Non
aPKC mut	h10c2	39.823	315.6	64.668	Non
aPKC mut	h10c2	39.823	292.778	64.668	Non
aPKC mut	h10c2	39.823	254.717	64.668	Non
aPKC mut	h10c2	39.823	220.357	64.668	Non
aPKC mut	h10c2	39.823	189.97	64.668	Non
aPKC mut	h10c3	38.202	322.73	62.037	Non
aPKC mut	h10c3	38.202	280.327	62.037	Non
aPKC mut	h10c3	38.202	236.113	62.037	Non
aPKC mut	h10c3	38.202	203.729	62.037	Non
aPKC mut	h10c4	42.093	300.213	68.366	Non
aPKC mut	h10c4	42.093	292.36	68.366	Non
aPKC mut	h10c4	42.093	273.924	68.366	Non
aPKC mut	h10c4	35.663	295.082	57.907	Non
aPKC mut	h10c4	35.663	265.063	57.907	Non
aPKC mut	h10c4	35.663	232.73	57.907	Non
aPKC mut	h10c4	35.663	200.422	57.907	Non
aPKC sib	h11c1	58.129	712.58	89.189	Non
aPKC sib	h11c1	58.129	666.197	89.189	Non
aPKC sib	h11c1	58.129	612.182	89.189	Non
aPKC sib	h11c1	58.25	572.278	89.394	Non
aPKC sib	h11c1	58.25	504.352	89.394	Non
aPKC sib	h11c1	58.25	442.928	89.394	Non
aPKC sib	h11c1	58.25	362.517	89.394	Non
aPKC sib	h11c2	39.237	782.57	60.174	Non
aPKC sib	h11c2	39.237	779.062	60.174	Non
aPKC sib	h11c2	40.811	694.459	62.593	Non
aPKC sib	h11c2	40.811	626.419	62.593	Non
aPKC sib	h11c2	40.811	544.936	62.593	Non
aPKC sib	h11c2	40.811	471.384	62.593	Non
aPKC sib	h11c2	37.36	448.891	57.289	Non
aPKC sib	h11c2	37.36	367.104	57.289	Non
aPKC sib	h11c3	39.055	764.738	59.901	Non
aPKC sib	h11c3	42.87	795.289	65.749	Non
aPKC sib	h11c3	42.87	779.6	65.749	Non
aPKC sib	h11c3	39.6	878.014	60.742	Non
aPKC sib	h11c3	39.6	796.897	60.742	Non
aPKC sib	h11c3	39.6	690.555	60.742	Non
aPKC sib	h11c3	39.6	565.46	60.742	Non
aPKC sib	h11c3	39.6	467.879	60.742	Non
aPKC sib	h11c3	39.6	374.727	60.742	Non
aPKC sib	h11c3	39.6	296.107	60.742	Non
aPKC sib	h11c4	36.754	580.27	56.357	Non
aPKC sib	h11c4	44.565	702.05	68.368	Non
aPKC sib	h11c4	44.565	671.227	68.368	Non
aPKC sib	h11c4	44.565	636.886	68.368	Non
aPKC sib	h11c4	41.235	627.354	63.256	Non
aPKC sib	h11c4	41.235	564.599	63.256	Non
aPKC sib	h11c4	41.235	468.656	63.256	Non
aPKC sib	h11c4	41.235	402.267	63.256	Non
aPKC sib	h11c4	41.235	353.807	63.256	Non
aPKC sib	h11c4	41.235	302.504	63.256	Non
aPKC sib	h11c4	41.235	254.617	63.256	Non
aPKC sib	h11c4	41.235	216.418	63.256	Non
aPKC sib	h12c1	44.747	1120.216	68.648	Non
aPKC sib	h12c1	45.05	1241.823	69.112	Non
aPKC sib	h12c1	45.05	1238.637	69.112	Non
aPKC sib	h12c1	45.05	1084.415	69.112	Non
aPKC sib	h12c1	45.05	903.159	69.112	Non
aPKC sib	h12c1	39.963	739.565	61.297	Non
aPKC sib	h12c1	39.963	583.694	61.297	Non
aPKC sib	h12c1	39.842	521.291	61.118	Non
aPKC sib	h12c2	35.362	945.305	54.221	Non
aPKC sib	h12c2	34.756	1027.278	53.299	Non
aPKC sib	h12c2	34.756	1002.907	53.299	Non
aPKC sib	h12c2	39.297	1058.68	60.275	Non
aPKC sib	h12c2	39.297	920.756	60.275	Non
aPKC sib	h12c2	39.297	805.159	60.275	Non
aPKC sib	h12c2	39.297	647.979	60.275	Non
aPKC sib	h12c2	42.386	703.205	65.001	Non
aPKC sib	h12c2	42.386	580.984	65.001	Non
aPKC sib	h12c2	42.386	482.292	65.001	Non
aPKC sib	h12c2	42.386	378.493	65.001	Non
aPKC sib	h12c2	42.386	329.464	65.001	Non
aPKC sib	h12c3	46.261	1000.832	70.965	Non
aPKC sib	h12c3	46.261	977.3	70.965	Non
aPKC sib	h12c3	50.439	990.594	77.391	Non
aPKC sib	h12c3	40.327	1063.245	61.847	Non
aPKC sib	h12c3	40.508	917.583	62.125	Non
aPKC sib	h12c3	40.508	624.433	62.125	Non
aPKC sib	h12c3	40.508	518.923	62.125	Non
aPKC sib	h12c3	40.508	416.822	62.125	Non
aPKC sib	h12c3	41.78	334.973	64.084	Non
aPKC sib	h12c4	44.868	810.804	68.825	Non
aPKC sib	h12c4	48.743	1031.507	74.789	Non
aPKC sib	h12c4	48.743	1023.434	74.789	Non
aPKC sib	h12c4	48.743	962.197	74.789	Non
aPKC sib	h12c4	48.743	893.188	74.789	Non
aPKC sib	h12c4	48.743	793.228	74.789	Non
aPKC sib	h12c4	48.743	697.087	74.789	Non
aPKC sib	h12c4	48.743	637.147	74.778	Non
aPKC sib	h12c4	48.743	506.559	74.778	Non
aPKC sib	h12c4	48.743	410.402	74.778	Non
aPKC sib	h12c4	48.743	344.552	74.778	Non
aPKC sib	h12c5	42.325	886.206	64.916	Non
aPKC sib	h12c5	46.382	857.139	71.153	Non
aPKC sib	h12c5	38.995	762.79	59.809	Non
aPKC sib	h12c5	38.995	704.741	59.809	Non
aPKC sib	h12c5	38.995	650.663	59.809	Non
aPKC sib	h12c5	38.995	585.795	59.809	Non
aPKC sib	h12c5	38.995	508.827	59.809	Non
aPKC sib	h12c5	38.995	438.323	59.809	Non
aPKC sib	h12c5	38.995	371.619	59.809	Non
aPKC sib	h13c1	33.908	712.986	51.982	Non
aPKC sib	h13c1	29.064	881.874	44.555	Non
aPKC sib	h13c1	35.18	880.33	53.946	Non
aPKC sib	h13c1	35.18	872.192	53.946	Non
aPKC sib	h13c1	34.393	935.22	52.734	Non
aPKC sib	h13c1	34.393	879.631	52.734	Non
aPKC sib	h13c1	34.393	838.288	52.734	Non
aPKC sib	h13c1	32.274	758.73	49.472	Non
aPKC sib	h13c1	32.274	681.876	49.472	Non
aPKC sib	h13c2	43.052	1067.797	66.033	Non
aPKC sib	h13c2	42.809	1094.799	65.675	Non
aPKC sib	h13c2	43.052	1003.01	66.048	Non
aPKC sib	h13c2	43.052	954.209	66.048	Non
aPKC sib	h13c2	43.294	1023.337	66.422	Non
aPKC sib	h13c2	43.294	993.402	66.422	Non
aPKC sib	h13c2	41.78	879.526	64.094	Non
aPKC sib	h13c2	42.386	802.381	65.026	Non
aPKC sib	h13c2	42.386	710.119	65.026	Non
aPKC sib	h13c2	42.386	628.646	65.026	Non
aPKC sib	h13c2	42.386	535.712	65.026	Non
aPKC sib	h13c2	42.386	460.691	65.026	Non
aPKC sib	h13c3	38.329	886.028	58.789	Non
aPKC sib	h13c3	38.329	820.506	58.789	Non
aPKC sib	h13c3	43.173	876.526	66.235	Non
aPKC sib	h13c3	42.991	807.889	65.948	Non
aPKC sib	h13c3	42.991	699.891	65.948	Non
aPKC sib	h13c3	42.991	597.358	65.948	Non
aPKC sib	h13c3	42.991	484.878	65.948	Non
aPKC sib	h13c3	43.233	436.594	66.314	Non
aPKC sib	h13c3	43.233	379.643	66.314	Non
aPKC sib	h13c3	43.233	304.312	66.314	Non
aPKC sib	h13c3	43.233	248.412	66.314	Non
aPKC sib	h13c3	43.233	206.46	66.314	Non
aPKC sib	h13c4	44.989	558.262	69.022	Non
aPKC sib	h13c4	45.837	609.097	70.333	Non
aPKC sib	h13c4	45.837	594.776	70.333	Non
aPKC sib	h13c4	44.565	575.793	68.373	Non
aPKC sib	h13c4	44.565	559.966	68.373	Non
aPKC sib	h13c4	44.565	515.292	68.373	Non
aPKC sib	h13c4	45.292	495.048	69.488	Non
aPKC sib	h13c4	45.292	432.135	69.488	Non
aPKC sib	h13c4	45.292	367.916	69.488	Non
aPKC sib	h13c4	45.292	333.346	69.488	Non
aPKC sib	h13c4	44.929	335.897	68.925	Non
aPKC sib	h13c5	37.844	851.814	58.037	Non
aPKC sib	h13c5	36.33	855.122	55.716	Non
aPKC sib	h13c5	36.33	809.537	55.716	Non
aPKC sib	h13c5	37.36	673.656	57.303	Non
aPKC sib	h13c5	37.36	545.666	57.303	Non
aPKC sib	h13c5	37.36	460.347	57.303	Non
aPKC sib	h13c5	37.36	392.764	57.303	Non
aPKC sib	h13c5	37.36	335.463	57.303	Non
aPKC sib	h13c5	37.36	275.736	57.303	Non
aPKC sib	h13c5	37.36	219.542	57.303	Non
aPKC sib	h14c1	45.05	312.324	69.108	Non
aPKC sib	h14c1	45.05	309.692	69.108	Non
aPKC sib	h14c1	46.019	319.15	70.618	Non
aPKC sib	h14c1	46.019	282.266	70.618	Non
aPKC sib	h14c1	45.292	236.605	69.493	Non
aPKC sib	h14c1	45.292	192.663	69.493	Non
aPKC sib	h14c2	41.477	255.852	63.629	Non
aPKC sib	h14c2	41.477	261.585	63.629	Non
aPKC sib	h14c2	41.477	251.721	63.629	Non
aPKC sib	h14c2	43.778	241.823	67.164	Non
aPKC sib	h14c2	43.778	217.391	67.164	Non
aPKC sib	h14c2	43.415	185.947	66.615	Non
aPKC sib	h14c2	43.415	152.846	66.615	Non
aPKC sib	h14c2	43.415	137.601	66.615	Non
aPKC sib	h14c2	43.415	120.268	66.615	Non
aPKC sib	h15c1	47.714	624.393	73.203	Non
aPKC sib	h15c1	48.077	637.485	73.773	Non
aPKC sib	h15c1	48.864	646.256	74.976	Non
aPKC sib	h15c1	48.925	605.693	75.065	Non
aPKC sib	h15c1	48.925	540.828	75.065	Non
aPKC sib	h15c1	48.925	448.005	75.065	Non
aPKC sib	h15c1	48.925	324.799	75.065	Non
aPKC sib	h15c1	48.925	265.139	75.065	Non
aPKC sib	h15c1	48.925	203.049	75.065	Non
aPKC sib	h15c1	48.925	168.513	75.065	Non
aPKC sib	h15c2	38.329	591.376	58.777	Non
aPKC sib	h15c2	38.752	607.149	59.437	Non
aPKC sib	h15c2	38.752	527.832	59.437	Non
aPKC sib	h15c2	38.752	444.713	59.437	Non
aPKC sib	h15c2	38.752	346.911	59.437	Non
aPKC sib	h15c2	38.752	284.761	59.437	Non
aPKC sib	h15c2	38.752	232.817	59.437	Non
aPKC sib	h15c2	38.752	186.984	59.437	Non
aPKC sib	h15c3	43.052	403.605	66.04	Non
aPKC sib	h15c3	32.879	516.191	50.404	Non
aPKC sib	h15c3	32.879	488.512	50.404	Non
aPKC sib	h15c3	37.541	499.662	57.572	Non
aPKC sib	h15c3	38.631	502.857	59.244	Non
aPKC sib	h15c3	38.631	446.53	59.244	Non
aPKC sib	h15c3	38.631	379.911	59.244	Non
aPKC sib	h15c3	38.631	304.306	59.244	Non
aPKC sib	h15c3	38.026	347.921	58.318	Non
aPKC sib	h15c4	47.775	468.66	73.268	Non
aPKC sib	h15c4	47.835	467.92	73.383	Non
aPKC sib	h15c4	52.134	459.295	79.995	Non
aPKC sib	h15c4	51.71	404.321	79.352	Non
aPKC sib	h15c4	51.408	328.022	78.882	Non
aPKC sib	h15c4	51.408	270.413	78.882	Non
aPKC sib	h15c4	51.408	235.303	78.882	Non
aPKC sib	h15c4	51.408	202.202	78.882	Non
aPKC sib	h15c4	51.408	168.18	78.882	Non
aPKC sib	h15c5	45.05	550.919	69.124	Non
aPKC sib	h15c5	45.05	535.964	69.124	Non
aPKC sib	h15c5	48.622	531.956	74.586	Non
aPKC sib	h15c5	48.622	489.073	74.586	Non
aPKC sib	h15c5	48.622	429.687	74.586	Non
aPKC sib	h15c5	48.622	365.396	74.586	Non
aPKC sib	h15c5	48.622	307.358	74.586	Non
aPKC sib	h15c5	48.622	264.939	74.586	Non
aPKC sib	h15c5	48.622	212.437	74.586	Non
aPKC sib	h16c1	47.835	405.112	73.381	Non
aPKC sib	h16c1	50.499	413.129	77.483	Non
aPKC sib	h16c1	49.288	382.716	75.63	Non
aPKC sib	h16c1	49.288	343.861	75.63	Non
aPKC sib	h16c1	49.288	293.528	75.63	Non
aPKC sib	h16c1	49.288	236.668	75.63	Non
aPKC sib	h16c1	49.288	192.94	75.63	Non
aPKC sib	h16c2	53.527	331.072	82.13	Non
aPKC sib	h16c2	55.283	366.23	84.824	Non
aPKC sib	h16c2	55.283	383.653	84.824	Non
aPKC sib	h16c2	57.584	391.323	88.367	Non
aPKC sib	h16c2	58.068	381.855	89.102	Non
aPKC sib	h16c2	58.068	336.633	89.102	Non
aPKC sib	h16c2	58.068	288.879	89.102	Non
aPKC sib	h16c2	58.068	228.393	89.102	Non
aPKC sib	h16c2	56.797	188.004	87.157	Non
aPKC sib	h16c2	56.797	151.073	87.157	Non
aPKC sib	h16c3	43.536	319.911	66.789	Non
aPKC sib	h16c3	52.8	306.492	81.034	Non
aPKC sib	h16c3	52.8	290.397	81.034	Non
aPKC sib	h16c3	52.8	256.862	81.034	Non
aPKC sib	h16c3	52.8	208.881	81.034	Non
aPKC sib	h16c3	52.8	167.969	81.034	Non
aPKC sib	h16c3	52.8	141.911	81.034	Non
aPKC sib	h17c1	36.633	577.398	56.182	Non
aPKC sib	h17c1	40.751	647.337	62.517	Non
aPKC sib	h17c1	41.538	634.672	63.714	Non
aPKC sib	h17c1	43.052	634.038	66.038	Non
aPKC sib	h17c1	43.052	534.818	66.038	Non
aPKC sib	h17c1	43.354	436.596	66.51	Non
aPKC sib	h17c1	43.354	414.668	66.51	Non
aPKC sib	h17c1	43.354	367.964	66.51	Non
aPKC sib	h17c1	43.354	306.952	66.51	Non
aPKC sib	h17c1	43.354	255.291	66.51	Non
aPKC sib	h17c1	43.354	193.691	66.51	Non
aPKC sib	h17c1	43.354	152.321	66.51	Non
aPKC sib	h17c2	37.481	537.878	57.487	Non
aPKC sib	h17c2	37.965	415.46	58.245	Non
aPKC sib	h17c2	38.874	609.521	59.62	Non
aPKC sib	h17c2	38.874	561.68	59.62	Non
aPKC sib	h17c2	39.116	506.813	59.977	Non
aPKC sib	h17c2	39.116	469.981	59.977	Non
aPKC sib	h17c2	39.116	415.775	59.977	Non
aPKC sib	h17c2	39.116	368.39	59.977	Non
aPKC sib	h17c2	39.116	335.8	59.977	Non
aPKC sib	h17c2	39.116	296.221	59.977	Non
aPKC sib	h17c2	39.116	266.475	59.977	Non
aPKC sib	h17c2	39.116	230.047	59.977	Non
aPKC sib	h17c2	39.116	191.46	59.977	Non
aPKC sib	h17c2	39.116	163.579	59.977	Non
aPKC sib	h17c3	37.178	520.642	57.02	Non
aPKC sib	h17c3	38.995	503.387	59.804	Non
aPKC sib	h17c3	39.237	471.989	60.193	Non
aPKC sib	h17c3	39.237	467.195	60.193	Non
aPKC sib	h17c3	39.237	442.697	60.193	Non
aPKC sib	h17c3	39.358	399.642	60.36	Non
aPKC sib	h17c3	41.538	399.071	63.719	Non
aPKC sib	h17c3	41.719	419.96	63.971	Non
aPKC sib	h17c3	41.719	390.086	63.971	Non
aPKC sib	h17c3	41.719	342.472	63.971	Non
aPKC sib	h17c3	41.719	281.074	63.971	Non
aPKC sib	h17c3	41.719	216.899	63.971	Non
aPKC sib	h17c3	41.719	174.259	63.971	Non
aPKC sib	h17c4	42.386	549.528	65.006	Non
aPKC sib	h17c4	42.386	622.594	65.006	Non
aPKC sib	h17c4	42.386	668.218	65.006	Non
aPKC sib	h17c4	42.022	698.931	64.447	Non
aPKC sib	h17c4	42.022	644.07	64.447	Non
aPKC sib	h17c4	41.78	606.505	64.097	Non
aPKC sib	h17c4	41.78	502.755	64.097	Non
aPKC sib	h17c4	41.78	398.469	64.097	Non
aPKC sib	h17c4	41.78	310.661	64.097	Non
aPKC sib	h17c4	41.78	255.63	64.097	Non
aPKC sib	h17c4	41.78	224.743	64.097	Non
aPKC sib	h17c4	41.78	199.62	64.097	Non
aPKC sib	h17c4	41.78	182.174	64.097	Non
aPKC sib	h17c4	41.78	169.396	64.097	Non
aPKC sib	h18c1	41.719	553.506	63.984	Non
aPKC sib	h18c1	46.019	541.672	70.606	Non
aPKC sib	h18c1	46.019	495.042	70.606	Non
aPKC sib	h18c1	46.019	429.764	70.606	Non
aPKC sib	h18c1	46.019	382.045	70.606	Non
aPKC sib	h18c1	46.019	325.872	70.606	Non
aPKC sib	h18c1	46.019	287.716	70.606	Non
aPKC sib	h18c2	43.597	404.048	66.881	Non
aPKC sib	h18c2	46.987	501.334	72.087	Non
aPKC sib	h18c2	46.987	537.332	72.087	Non
aPKC sib	h18c2	46.987	540.261	72.087	Non
aPKC sib	h18c2	46.987	511.043	72.087	Non
aPKC sib	h18c2	49.167	488.901	75.427	Non
aPKC sib	h18c2	49.167	401.431	75.427	Non
aPKC sib	h18c2	49.167	340.127	75.427	Non
aPKC sib	h18c2	49.167	245.847	75.427	Non
aPKC sib	h18c2	49.167	188.171	75.427	Non
aPKC sib	h18c3	43.899	540.778	67.352	Non
aPKC sib	h18c3	44.02	554.235	67.521	Non
aPKC sib	h18c3	45.05	540.116	69.108	Non
aPKC sib	h18c3	45.05	471.899	69.108	Non
aPKC sib	h18c3	45.05	394.025	69.108	Non
aPKC sib	h18c3	45.05	295.499	69.108	Non
aPKC sib	h18c3	45.05	258.483	69.108	Non
aPKC sib	h18c3	45.05	194.226	69.108	Non
aPKC sib	h18c4	47.835	489.449	73.394	Non
aPKC sib	h18c4	47.835	480.284	73.394	Non
aPKC sib	h18c4	47.835	448.348	73.394	Non
aPKC sib	h18c4	47.835	389.051	73.394	Non
aPKC sib	h18c4	47.835	314.697	73.394	Non
aPKC sib	h18c4	47.835	274.061	73.394	Non
aPKC sib	h18c4	47.835	218.076	73.394	Non
aPKC sib	h18c4	47.835	175.978	73.394	Non
aPKC sib	h18c4	47.835	146.728	73.394	Non
aPKC sib	h18c5	46.261	507.363	70.96	Non
aPKC sib	h18c5	46.261	495.067	70.96	Non
aPKC sib	h18c5	45.353	490.301	69.58	Non
aPKC sib	h18c5	45.353	424.185	69.58	Non
aPKC sib	h18c5	45.353	373.861	69.58	Non
aPKC sib	h18c5	45.353	278.065	69.58	Non
aPKC sib	h18c5	45.353	208.505	69.58	Non
aPKC sib	h18c5	45.353	156.356	69.58	Non
aPKC sib	h18c5	45.353	116.226	69.58	Non
aPKC sib	h19c1	49.773	592.969	76.36	Non
aPKC sib	h19c1	49.894	672.68	76.551	Non
aPKC sib	h19c1	49.894	662.709	76.551	Non
aPKC sib	h19c1	49.894	585.364	76.551	Non
aPKC sib	h19c1	49.894	503.048	76.551	Non
aPKC sib	h19c1	49.894	430.817	76.551	Non
aPKC sib	h19c1	49.894	349.77	76.551	Non
aPKC sib	h19c1	49.894	281.132	76.551	Non
aPKC sib	h19c1	49.894	222.894	76.551	Non
aPKC sib	h19c2	47.048	635.739	72.179	Non
aPKC sib	h19c2	48.32	672.336	74.14	Non
aPKC sib	h19c2	53.466	647.79	82.051	Non
aPKC sib	h19c2	52.982	580.582	81.302	Non
aPKC sib	h19c2	52.982	496.524	81.302	Non
aPKC sib	h19c2	52.982	413.735	81.302	Non
aPKC sib	h19c2	52.982	351.016	81.302	Non
aPKC sib	h19c2	52.982	279.314	81.302	Non
aPKC sib	h19c2	52.982	218.416	81.302	Non
aPKC sib	h19c2	52.982	179.173	81.302	Non
aPKC sib	h19c3	43.839	515.961	67.243	Non
aPKC sib	h19c3	40.327	576.603	61.854	Non
aPKC sib	h19c3	41.598	510.88	63.801	Non
aPKC sib	h19c3	43.536	439.378	66.774	Non
aPKC sib	h19c3	43.536	368.469	66.774	Non
aPKC sib	h19c3	43.536	288.222	66.774	Non
aPKC sib	h19c3	43.536	232.305	66.774	Non
aPKC sib	h19c3	43.536	189.098	66.774	Non
aPKC sib	h19c3	43.536	164.496	66.774	Non
aPKC sib	h19c4	42.507	624.919	65.186	Non
aPKC sib	h19c4	42.507	589.293	65.186	Non
aPKC sib	h19c4	42.507	501.96	65.186	Non
aPKC sib	h19c4	42.809	339.444	65.665	Non
aPKC sib	h19c4	42.809	240.559	65.665	Non
aPKC sib	h19c4	42.809	194.855	65.665	Non
aPKC sib	h19c4	42.809	150.944	65.665	Non
aPKC sib	h19c4	42.809	126.41	65.665	Non
aPKC mut	h12c1	52.013	545.423	79.8	Non
aPKC mut	h12c1	45.292	549.938	69.484	Non
aPKC mut	h12c1	45.11	552.754	69.2	Non
aPKC mut	h12c1	44.505	528.865	68.278	Non
aPKC mut	h12c1	44.505	427.492	68.278	Non
aPKC mut	h12c1	44.505	370.599	68.278	Non
aPKC mut	h12c1	44.505	276.011	68.278	Non
aPKC mut	h12c1	44.505	209.597	68.278	Non
aPKC mut	h12c1	44.505	170.224	68.278	Non
aPKC mut	h12c2	42.325	639.64	64.921	Non
aPKC mut	h12c2	43.354	668.665	66.51	Non
aPKC mut	h12c2	44.626	627.733	68.441	Non
aPKC mut	h12c2	44.384	533.628	68.09	Non
aPKC mut	h12c2	44.384	422.866	68.09	Non
aPKC mut	h12c2	44.384	338.099	68.09	Non
aPKC mut	h12c2	44.384	284.312	68.09	Non
aPKC mut	h12c3	44.929	739.867	68.928	Non
aPKC mut	h12c3	44.929	737.107	68.928	Non
aPKC mut	h12c3	44.929	672.525	68.928	Non
aPKC mut	h12c3	45.595	566.151	69.956	Non
aPKC mut	h12c3	45.595	435.561	69.956	Non
aPKC mut	h12c3	45.595	387.387	69.956	Non
aPKC mut	h12c3	45.595	285.386	69.956	Non
aPKC mut	h12c3	45.595	229.299	69.956	Non
aPKC mut	h12c3	45.595	195.594	69.956	Non
aPKC mut	h12c3	45.595	171.012	69.956	Non
aPKC mut	h12c4	39.721	750.299	60.912	Non
aPKC mut	h12c4	40.206	708.319	61.668	Non
aPKC mut	h12c4	40.993	684.595	62.869	Non
aPKC mut	h12c4	42.083	704.235	64.548	Non
aPKC mut	h12c4	42.083	655.395	64.548	Non
aPKC mut	h12c4	42.083	583.963	64.548	Non
aPKC mut	h12c4	42.083	504.01	64.548	Non
aPKC mut	h12c4	42.083	434.336	64.548	Non
aPKC mut	h12c4	42.083	350.747	64.548	Non
aPKC mut	h12c4	42.083	273.006	64.548	Non
aPKC mut	h12c4	42.083	220.971	64.548	Non
aPKC mut	h12c5	47.29	656.543	72.552	Non
aPKC mut	h12c5	47.29	679.772	72.552	Non
aPKC mut	h12c5	47.29	655.601	72.552	Non
aPKC mut	h12c5	44.384	603.821	68.085	Non
aPKC mut	h12c5	44.384	535.466	68.085	Non
aPKC mut	h12c5	44.384	471.671	68.085	Non
aPKC mut	h12c5	44.384	382.351	68.085	Non
aPKC mut	h12c5	44.384	302.336	68.085	Non
aPKC mut	h12c5	44.384	248.617	68.085	Non
aPKC mut	h12c5	44.384	209.845	68.085	Non
aPKC mut	h12c5	44.384	179.123	68.085	Non
aPKC mut	h12c6	44.747	591.895	68.647	Non
aPKC mut	h12c6	44.747	579.078	68.647	Non
aPKC mut	h12c6	44.323	591.753	67.992	Non
aPKC mut	h12c6	44.141	493.472	67.725	Non
aPKC mut	h12c6	44.141	394.484	67.725	Non
aPKC mut	h12c6	44.141	320.563	67.725	Non
aPKC mut	h12c6	44.141	266.903	67.725	Non
aPKC mut	h12c6	44.141	212.372	67.725	Non
aPKC mut	h12c6	44.141	170.257	67.725	Non
aPKC mut	h12c6	44.141	143.881	67.725	Non
aPKC mut	h13c1	52.376	757.712	80.345	Non
aPKC mut	h13c1	52.437	832.683	80.465	Non
aPKC mut	h13c1	52.437	776.911	80.465	Non
aPKC mut	h13c1	51.771	730.712	79.451	Non
aPKC mut	h13c1	51.771	646.818	79.451	Non
aPKC mut	h13c1	51.771	538.78	79.451	Non
aPKC mut	h13c1	51.771	417.283	79.451	Non
aPKC mut	h13c1	51.771	309.201	79.451	Non
aPKC mut	h13c1	51.771	238.316	79.451	Non
aPKC mut	h13c1	51.771	172.827	79.451	Non
aPKC mut	h13c2	47.29	664.525	72.552	Non
aPKC mut	h13c2	47.29	715.491	72.552	Non
aPKC mut	h13c2	47.29	699.726	72.552	Non
aPKC mut	h13c2	47.29	645.751	72.552	Non
aPKC mut	h13c2	49.712	672.957	76.273	Non
aPKC mut	h13c2	49.712	601.252	76.273	Non
aPKC mut	h13c2	49.712	493.763	76.273	Non
aPKC mut	h13c2	49.712	392.498	76.273	Non
aPKC mut	h13c2	49.712	294.246	76.273	Non
aPKC mut	h13c3	51.408	709.288	78.88	Non
aPKC mut	h13c3	34.756	743.271	53.3	Non
aPKC mut	h13c3	42.143	837.633	64.646	Non
aPKC mut	h13c3	42.143	778.968	64.646	Non
aPKC mut	h13c3	42.143	751.951	64.658	Non
aPKC mut	h13c3	42.143	649.319	64.658	Non
aPKC mut	h13c3	42.143	537.683	64.658	Non
aPKC mut	h13c3	42.143	368.403	64.658	Non
aPKC mut	h13c4	42.143	799.284	64.641	Non
aPKC mut	h13c4	42.143	783.221	64.641	Non
aPKC mut	h13c4	47.472	805.157	72.835	Non
aPKC mut	h13c4	47.472	776.555	72.835	Non
aPKC mut	h13c4	47.472	714.632	72.835	Non
aPKC mut	h13c4	47.472	598.999	72.835	Non
aPKC mut	h13c4	47.472	447.659	72.835	Non
aPKC mut	h13c4	47.472	366.34	72.835	Non
aPKC mut	h13c4	47.472	259.061	72.835	Non
aPKC mut	h14c1	36.754	331.459	56.367	Non
aPKC mut	h14c1	40.751	357.562	62.506	Non
aPKC mut	h14c1	40.751	354.933	62.506	Non
aPKC mut	h14c1	40.751	357.703	62.506	Non
aPKC mut	h14c1	40.751	357.511	62.506	Non
aPKC mut	h14c1	40.751	327.251	62.506	Non
aPKC mut	h14c1	40.751	272.379	62.506	Non
aPKC mut	h14c1	40.751	197.969	62.506	Non
aPKC mut	h14c1	40.751	197.969	62.506	Non
aPKC mut	h14c1	40.751	155.693	62.506	Non
aPKC mut	h14c2	35.483	384.964	54.41	Non
aPKC mut	h14c2	35.483	377.375	54.41	Non
aPKC mut	h14c2	35.483	338.811	54.41	Non
aPKC mut	h14c2	39.176	306.988	60.083	Non
aPKC mut	h14c2	39.176	263.806	60.083	Non
aPKC mut	h14c2	39.176	221.579	60.083	Non
aPKC mut	h14c2	39.176	200.52	60.083	Non
aPKC mut	h14c2	48.017	316.273	73.665	Non
aPKC mut	h14c2	48.017	307.615	73.665	Non
aPKC mut	h14c2	48.017	283.061	73.665	Non
aPKC mut	h14c2	49.349	287.073	75.724	Non
aPKC mut	h14c2	49.349	257.945	75.724	Non
aPKC mut	h14c2	49.349	208.039	75.724	Non
aPKC mut	h14c2	49.349	160.698	75.724	Non
aPKC mut	h14c2	49.349	121.781	75.724	Non
aPKC mut	h14c2	49.349	103.501	75.724	Non
aPKC mut	h14c3	36.028	340.22	55.243	Non
aPKC mut	h14c3	36.028	371.197	55.243	Non
aPKC mut	h14c3	37.299	387.886	57.206	Non
aPKC mut	h14c3	37.299	364.957	57.206	Non
aPKC mut	h14c3	37.299	317.722	57.206	Non
aPKC mut	h14c3	37.299	272.281	57.206	Non
aPKC mut	h14c3	37.299	236.465	57.206	Non
aPKC mut	h14c3	37.118	271.066	56.937	Non
aPKC mut	h14c3	37.118	207.449	56.937	Non
aPKC mut	h14c3	37.118	169.159	56.937	Non
aPKC mut	h14c3	37.118	137.167	56.937	Non
aPKC mut	h14c5	41.598	328.463	63.813	Non
aPKC mut	h14c5	41.598	306.281	63.813	Non
aPKC mut	h14c5	41.598	268.268	63.813	Non
aPKC mut	h14c5	41.598	230.506	63.813	Non
aPKC mut	h14c5	41.598	185.437	63.813	Non
aPKC mut	h14c5	41.598	153.954	63.813	Non
aPKC mut	h14c5	41.598	128.462	63.813	Non
aPKC mut	h15c1	48.32	415.581	74.133	Non
aPKC mut	h15c1	45.292	500.148	69.479	Non
aPKC mut	h15c1	45.292	535.625	69.479	Non
aPKC mut	h15c1	47.411	555.417	72.737	Non
aPKC mut	h15c1	47.411	535.318	72.737	Non
aPKC mut	h15c1	47.411	466.592	72.737	Non
aPKC mut	h15c1	47.411	373.355	72.737	Non
aPKC mut	h15c1	47.411	284.385	72.737	Non
aPKC mut	h15c1	47.411	214.934	72.737	Non
aPKC mut	h15c1	47.411	185.014	72.737	Non
aPKC mut	h15c1	47.411	148.117	72.737	Non
aPKC mut	h15c1	47.411	122.207	72.737	Non
aPKC mut	h15c1	47.411	102.752	72.737	Non
aPKC mut	h15c2	34.514	525.902	52.914	Non
aPKC mut	h15c2	34.514	486.82	52.914	Non
aPKC mut	h15c2	34.514	439.521	52.914	Non
aPKC mut	h15c2	42.264	451.808	64.843	Non
aPKC mut	h15c2	42.264	431.092	64.843	Non
aPKC mut	h15c2	42.264	393.816	64.843	Non
aPKC mut	h15c2	42.264	329.264	64.843	Non
aPKC mut	h15c2	42.264	287.468	64.843	Non
aPKC mut	h15c2	42.264	243.837	64.843	Non
aPKC mut	h15c2	42.264	191.426	64.843	Non
aPKC mut	h15c3	36.815	402.594	56.457	Non
aPKC mut	h15c3	36.815	413.558	56.457	Non
aPKC mut	h15c3	36.815	390.528	56.457	Non
aPKC mut	h15c3	36.815	323.081	56.457	Non
aPKC mut	h15c3	36.815	242.259	56.457	Non
aPKC mut	h15c3	36.815	200.638	56.457	Non
aPKC mut	h15c4	37.784	442.944	57.947	Non
aPKC mut	h15c4	37.239	487.408	57.111	Non
aPKC mut	h15c4	39.419	426.091	60.461	Non
aPKC mut	h15c4	39.419	388.867	60.461	Non
aPKC mut	h15c4	39.419	351.568	60.461	Non
aPKC mut	h15c4	39.419	320.427	60.461	Non
aPKC mut	h15c4	39.419	282.783	60.461	Non
aPKC mut	h16c1	41.114	578.546	63.065	Non
aPKC mut	h16c1	41.114	572.627	63.065	Non
aPKC mut	h16c1	41.114	542.688	63.065	Non
aPKC mut	h16c1	41.114	509.947	63.065	Non
aPKC mut	h16c1	41.114	456.445	63.065	Non
aPKC mut	h16c1	41.114	392.443	63.065	Non
aPKC mut	h16c1	41.114	328.181	63.065	Non
aPKC mut	h16c1	41.114	261.888	63.065	Non
aPKC mut	h16c1	41.114	220.904	63.065	Non
aPKC mut	h16c1	41.114	187.807	63.065	Non
aPKC mut	h16c2	30.82	730.3	47.249	Non
aPKC mut	h16c2	30.82	729.565	47.249	Non
aPKC mut	h16c2	30.82	690.278	47.249	Non
aPKC mut	h16c2	36.875	749.014	56.553	Non
aPKC mut	h16c2	36.875	671.371	56.553	Non
aPKC mut	h16c2	36.875	568.354	56.553	Non
aPKC mut	h16c2	36.875	502.685	56.553	Non
aPKC mut	h16c2	36.875	421.501	56.553	Non
aPKC mut	h16c2	36.875	364.316	56.553	Non
aPKC mut	h16c2	36.875	310.054	56.553	Non
aPKC mut	h16c2	36.875	250.561	56.553	Non
aPKC mut	h16c3	30.82	730.3	47.249	Non
aPKC mut	h16c3	30.82	729.565	47.249	Non
aPKC mut	h16c3	30.82	690.278	47.249	Non
aPKC mut	h16c3	36.875	749.014	56.553	Non
aPKC mut	h16c3	36.875	671.371	56.553	Non
aPKC mut	h16c3	36.875	568.354	56.553	Non
aPKC mut	h16c3	36.875	502.685	56.553	Non
aPKC mut	h16c3	36.875	421.501	56.553	Non
aPKC mut	h16c3	36.875	364.316	56.553	Non
aPKC mut	h16c3	36.875	310.054	56.553	Non
aPKC mut	h16c3	36.875	250.561	56.553	Non
aPKC mut	h16c4	37.602	318.444	57.664	Non
aPKC mut	h16c4	37.602	318.447	57.664	Non
aPKC mut	h16c4	32.94	345.59	50.502	Non
aPKC mut	h16c4	32.94	353.534	50.502	Non
aPKC mut	h16c4	35.907	356.738	55.07	Non
aPKC mut	h16c4	35.907	356.642	55.07	Non
aPKC mut	h16c4	42.93	402.514	65.846	Non
aPKC mut	h16c4	43.475	374.954	66.68	Non
aPKC mut	h16c4	43.475	321.514	66.68	Non
aPKC mut	h16c4	43.475	287.783	66.68	Non
aPKC mut	h16c4	43.475	245.176	66.68	Non
aPKC mut	h16c4	43.475	220.614	66.68	Non
aPKC mut	h16c5	38.874	441.861	59.627	Non
aPKC mut	h16c5	41.235	458.891	63.258	Non
aPKC mut	h16c5	41.235	449.108	63.258	Non
aPKC mut	h16c5	41.235	433.242	63.258	Non
aPKC mut	h16c5	41.235	398.243	63.258	Non
aPKC mut	h16c5	41.235	343.859	63.258	Non
aPKC mut	h16c5	41.235	305.001	63.258	Non
aPKC mut	h16c5	41.235	265.938	63.258	Non
aPKC mut	h16c5	41.235	227.213	63.258	Non
aPKC mut	h16c6	44.141	457.009	67.704	Non
aPKC mut	h16c6	44.141	470.176	67.704	Non
aPKC mut	h16c6	43.597	475.3	66.874	Non
aPKC mut	h16c6	43.597	435.422	66.874	Non
aPKC mut	h16c6	43.597	405.832	66.874	Non
aPKC mut	h16c6	43.597	368.199	66.874	Non
aPKC mut	h16c6	43.597	335.849	66.874	Non
aPKC mut	h16c6	43.597	305.188	66.874	Non
aPKC mut	h16c7	37.905	374.438	58.136	Non
aPKC mut	h16c7	37.905	367.146	58.136	Non
aPKC mut	h16c7	37.905	353.755	58.136	Non
aPKC mut	h16c7	37.602	376.292	57.667	Non
aPKC mut	h16c7	37.602	370.126	57.667	Non
aPKC mut	h16c7	37.602	326.9	57.667	Non
aPKC mut	h16c7	37.602	291.007	57.667	Non
aPKC mut	h16c7	37.602	245.656	57.667	Non
aPKC mut	h16c7	37.602	209.474	57.667	Non
aPKC mut	h17c1	45.231	543.968	69.383	Non
aPKC mut	h17c1	44.323	501.403	67.982	Non
aPKC mut	h17c1	44.323	419.983	67.982	Non
aPKC mut	h17c1	44.323	332.816	67.982	Non
aPKC mut	h17c1	44.323	258.243	67.982	Non
aPKC mut	h17c1	44.323	204.875	67.982	Non
aPKC mut	h17c2	45.958	464.572	70.516	Non
aPKC mut	h17c2	45.958	474.481	70.516	Non
aPKC mut	h17c2	45.958	456.478	70.516	Non
aPKC mut	h17c2	45.958	414.123	70.516	Non
aPKC mut	h17c2	45.958	336.237	70.516	Non
aPKC mut	h17c2	45.958	281.905	70.516	Non
aPKC mut	h17c3	36.209	464.296	55.535	Non
aPKC mut	h17c3	36.391	396.742	55.821	Non
aPKC mut	h17c3	36.391	329.929	55.821	Non
aPKC mut	h17c3	36.391	272.858	55.821	Non
aPKC mut	h17c3	36.391	211.384	55.821	Non
aPKC mut	h17c3	36.391	165.423	55.821	Non
aPKC mut	h17c3	36.391	134.535	55.821	Non
aPKC mut	h17c4	37.42	424.227	57.391	Non
aPKC mut	h17c4	36.815	399.534	56.453	Non
aPKC mut	h17c4	42.809	391.62	65.66	Non
aPKC mut	h17c4	42.809	358.878	65.66	Non
aPKC mut	h17c4	42.809	318.798	65.66	Non
aPKC mut	h17c4	42.809	289.228	65.66	Non
aPKC mut	h18c1	52.437	838.124	80.442	Non
aPKC mut	h18c1	52.437	932.781	80.442	Non
aPKC mut	h18c1	55.586	962.287	85.284	Non
aPKC mut	h18c1	54.859	924.773	84.177	Non
aPKC mut	h18c1	54.859	776.431	84.177	Non
aPKC mut	h18c1	54.859	608.413	84.177	Non
aPKC mut	h18c1	54.859	462.854	84.177	Non
aPKC mut	h18c1	54.859	354.707	84.177	Non
aPKC mut	h18c1	54.859	259.938	84.177	Non
aPKC mut	h18c1	54.859	203.769	84.177	Non
aPKC mut	h18c1	54.859	172.266	84.177	Non
aPKC mut	h18c2	46.261	597.695	70.98	Non
aPKC mut	h18c2	45.897	650.819	70.426	Non
aPKC mut	h18c2	44.808	694.907	68.749	Non
aPKC mut	h18c2	46.019	707.772	70.59	Non
aPKC mut	h18c2	46.019	707.772	70.59	Non
aPKC mut	h18c2	47.472	723.92	72.831	Non
aPKC mut	h18c2	46.079	835.966	70.69	Non
aPKC mut	h18c2	45.595	868.122	69.941	Non
aPKC mut	h18c2	46.019	852.617	70.582	Non
aPKC mut	h18c2	45.353	821.36	69.559	Non
aPKC mut	h18c2	45.353	705.153	69.559	Non
aPKC mut	h18c2	45.353	564.844	69.559	Non
aPKC mut	h18c2	45.353	457.62	69.559	Non
aPKC mut	h18c3	51.71	891.917	79.337	Non
aPKC mut	h18c3	51.71	886.29	79.337	Non
aPKC mut	h18c3	51.71	793.122	79.337	Non
aPKC mut	h18c3	50.378	701.429	77.289	Non
aPKC mut	h18c3	50.378	529.54	77.289	Non
aPKC mut	h18c3	50.378	382.835	77.289	Non
aPKC mut	h18c3	50.378	314.477	77.289	Non
aPKC mut	h18c3	50.378	231.693	77.289	Non
aPKC mut	h18c3	50.378	199.095	77.289	Non
aPKC mut	h18c3	50.378	155.789	77.289	Non
aPKC mut	h18c4	40.993	694.898	62.878	Non
aPKC mut	h18c4	40.993	650.469	62.878	Non
aPKC mut	h18c4	40.993	547.386	62.878	Non
aPKC mut	h18c4	40.993	409.323	62.878	Non
aPKC mut	h18c4	40.993	306.69	62.878	Non
aPKC mut	h18c4	40.993	236.84	62.878	Non
aPKC mut	h18c4	40.993	172.281	62.878	Non
aPKC mut	h19c1	43.475	430.314	66.681	Non
aPKC mut	h19c1	43.475	413.582	66.681	Non
aPKC mut	h19c1	43.475	366.085	66.681	Non
aPKC mut	h19c1	43.475	294.915	66.681	Non
aPKC mut	h19c1	43.475	216.191	66.681	Non
aPKC mut	h19c1	43.475	178.616	66.681	Non
aPKC mut	h19c2	41.053	459.538	62.996	Non
aPKC mut	h19c2	41.053	385.417	62.996	Non
aPKC mut	h19c2	41.053	288.983	62.996	Non
aPKC mut	h19c2	41.053	223.603	62.996	Non
aPKC mut	h19c2	41.053	179.777	62.996	Non
aPKC mut	h19c2	41.053	148.668	62.996	Non
aPKC mut	h19c2	41.053	128.171	62.996	Non
aPKC mut	h19c3	39.237	394.282	60.172	Non
aPKC mut	h19c3	39.237	376.136	60.183	Non
aPKC mut	h19c3	39.237	313.237	60.183	Non
aPKC mut	h19c3	36.694	266.238	56.273	Non
aPKC mut	h19c3	36.694	229.681	56.273	Non
aPKC mut	h19c3	36.694	199.651	56.273	Non
aPKC mut	h19c3	36.694	167.524	56.273	Non
aPKC mut	h19c3	36.694	143.511	56.273	Non
aPKC mut	h19c4	56.918	363.221	87.342	Non
aPKC mut	h19c4	56.918	356.832	87.342	Non
aPKC mut	h19c4	56.918	320.696	87.342	Non
aPKC mut	h19c4	56.918	277.622	87.342	Non
aPKC mut	h19c4	56.918	229.845	87.342	Non
aPKC mut	h19c4	56.918	186.195	87.342	Non
aPKC mut	h19c4	56.918	163.608	87.342	Non
aPKC mut	h19c4	56.918	144.23	87.342	Non
aPKC mut	h19c4	56.918	125.746	87.342	Non
aPKC mut	h19c4	56.918	112.383	87.342	Non
aPKC mut	h20c1	42.628	561.783	65.395	Non
aPKC mut	h20c1	44.02	628.692	67.518	Non
aPKC mut	h20c1	41.659	637.175	63.914	Non
aPKC mut	h20c1	41.659	463.576	63.914	Non
aPKC mut	h20c1	41.659	296.301	63.914	Non
aPKC mut	h20c1	41.659	208.901	63.914	Non
aPKC mut	h20c2	43.96	413.557	67.434	Non
aPKC mut	h20c2	47.835	515.331	73.39	Non
aPKC mut	h20c2	47.835	427.108	73.39	Non
aPKC mut	h20c2	47.835	300.761	73.39	Non
aPKC mut	h20c2	47.835	194.715	73.39	Non
aPKC mut	h20c2	47.835	144.28	73.39	Non
aPKC mut	h20c2	47.835	129.486	73.39	Non
aPKC mut	h20c2	47.835	122.402	73.39	Non
aPKC mut	h20c3	52.134	544.219	79.991	Non
aPKC mut	h20c3	52.134	538.568	79.991	Non
aPKC mut	h20c3	52.195	486.887	80.08	Non
aPKC mut	h20c3	52.074	422.656	79.893	Non
aPKC mut	h20c3	52.074	317.958	79.893	Non
aPKC mut	h20c3	52.074	237.262	79.893	Non
aPKC mut	h20c3	52.074	237.262	79.893	Non
aPKC mut	h20c3	52.074	176.787	79.893	Non
aPKC mut	h20c4	50.499	368.234	77.472	Non
aPKC mut	h20c4	50.499	409.174	77.472	Non
aPKC mut	h20c4	50.499	358.721	77.472	Non
aPKC mut	h20c4	50.499	271.692	77.472	Non
aPKC mut	h20c4	50.499	199.805	77.472	Non
aPKC mut	h20c4	50.499	149.456	77.472	Non
aPKC mut	h20c4	50.499	124.956	77.472	Non
aPKC mut	h20c4	50.499	102.588	77.472	Non
aPKC sib	h20c1	36.149	1472.212	55.428	Non
aPKC sib	h20c1	36.149	1466.845	55.428	Non
aPKC sib	h20c1	36.149	1321.743	55.428	Non
aPKC sib	h20c1	37.36	1010.298	57.299	Non
aPKC sib	h20c1	37.36	768.086	57.299	Non
aPKC sib	h20c1	37.36	659.759	57.299	Non
aPKC sib	h20c2	31.547	1341.197	48.362	Non
aPKC sib	h20c2	38.389	1667.165	58.873	Non
aPKC sib	h20c2	38.389	1667.165	58.873	Non
aPKC sib	h20c2	38.389	1671.85	58.873	Non
aPKC sib	h20c2	36.815	1732.055	56.464	Non
aPKC sib	h20c2	36.815	1488.343	56.464	Non
aPKC sib	h20c2	36.815	1244.596	56.464	Non
aPKC sib	h20c2	36.815	986.025	56.464	Non
aPKC sib	h20c2	36.815	705.498	56.464	Non
aPKC sib	h20c3	32.697	1314.153	50.135	Non
aPKC sib	h20c3	32.697	1498.703	50.135	Non
aPKC sib	h20c3	32.697	1590.908	50.135	Non
aPKC sib	h20c3	33.727	1587.351	51.715	Non
aPKC sib	h20c3	33.727	1495.212	51.715	Non
aPKC sib	h20c3	33.727	1355.354	51.715	Non
aPKC sib	h20c3	33.727	1012.107	51.715	Non
aPKC sib	h20c3	33.727	738.273	51.715	Non
aPKC sib	h20c3	33.727	562.399	51.715	Non
aPKC sib	h20c4	31.244	1169.876	47.894	Non
aPKC sib	h20c4	31.244	1313.789	47.894	Non
aPKC sib	h20c4	31.244	1365.223	47.894	Non
aPKC sib	h20c4	31.244	1313.548	47.894	Non
aPKC sib	h20c4	36.875	1504.569	56.563	Non
aPKC sib	h20c4	36.875	1372.216	56.563	Non
aPKC sib	h20c4	36.875	1219.998	56.563	Non
aPKC sib	h20c4	36.875	957.111	56.563	Non
aPKC sib	h20c4	36.875	756.451	56.563	Non
aPKC sib	h20c5	43.294	1263.062	66.408	Non
aPKC sib	h20c5	43.294	1339.589	66.408	Non
aPKC sib	h20c5	43.294	1302.415	66.408	Non
aPKC sib	h20c5	43.294	1141.275	66.408	Non
aPKC sib	h20c5	43.294	966.33	66.408	Non
aPKC sib	h20c5	45.11	887.494	69.214	Non
aPKC sib	h20c5	45.11	652.817	69.214	Non
aPKC sib	h20c5	45.11	487.197	69.214	Non
aPKC sib	h20c6	41.417	1389.077	63.524	Non
aPKC sib	h20c6	41.417	1120.334	63.524	Non
aPKC sib	h20c6	41.417	890.363	63.524	Non
aPKC sib	h20c6	41.417	683.073	63.524	Non
aPKC sib	h20c6	41.417	465.703	63.524	Non
aPKC sib	h20c6	41.417	348.835	63.524	Non
aPKC sib	h20c7	38.692	1103.535	59.337	Non
aPKC sib	h20c7	38.692	1090.726	59.337	Non
aPKC sib	h20c7	38.692	937.958	59.337	Non
aPKC sib	h20c7	40.448	1014.574	62.04	Non
aPKC sib	h20c7	40.448	935.781	62.04	Non
aPKC sib	h20c7	40.448	810.941	62.04	Non
aPKC sib	h20c7	40.448	670.515	62.04	Non
aPKC sib	h20c7	40.448	584.318	62.04	Non
aPKC sib	h20c7	40.448	532.192	62.04	Non
aPKC sib	h21c1	49.046	1046.815	75.261	Non
aPKC sib	h21c1	50.439	1187.043	77.382	Non
aPKC sib	h21c1	50.439	1113.539	77.382	Non
aPKC sib	h21c1	50.439	994.814	77.382	Non
aPKC sib	h21c1	50.439	802.626	77.382	Non
aPKC sib	h21c1	50.439	634.859	77.382	Non
aPKC sib	h21c2	42.809	1330.38	65.674	Non
aPKC sib	h21c2	42.022	1387.981	64.46	Non
aPKC sib	h21c2	42.022	1024.45	64.46	Non
aPKC sib	h21c2	58.492	959.477	89.758	Non
aPKC sib	h21c2	58.492	745.999	89.758	Non
aPKC sib	h21c2	58.492	651.714	89.758	Non
aPKC sib	h21c2	58.492	504.661	89.758	Non
aPKC sib	h21c2	58.492	418.528	89.758	Non
aPKC sib	h21c3	40.327	1159.487	61.842	Non
aPKC sib	h21c3	40.327	1144.731	61.842	Non
aPKC sib	h21c3	43.899	945.126	67.339	Non
aPKC sib	h21c3	43.597	955.834	66.873	Non
aPKC sib	h21c3	43.597	850.134	66.873	Non
aPKC sib	h21c3	45.655	935.208	70.043	Non
aPKC sib	h21c3	45.655	812.397	70.043	Non
aPKC sib	h21c3	45.655	693.848	70.043	Non
aPKC sib	h21c4	66.485	1032.853	102.046	Non
aPKC sib	h21c4	66.485	1068.372	102.046	Non
aPKC sib	h21c4	66.666	1173.706	102.329	Non
aPKC sib	h21c4	66.666	1042.77	102.329	Non
aPKC sib	h21c4	66.182	891.927	101.57	Non
aPKC sib	h21c4	66.182	721.022	101.57	Non
aPKC sib	h21c4	66.182	514.427	101.57	Non
aPKC sib	h21c4	66.182	399.012	101.57	Non
aPKC sib	h21c4	66.182	307.169	101.57	Non
aPKC sib	h21c4	66.182	231.211	101.57	Non
aPKC sib	h21c5	47.23	1272.818	72.463	Non
aPKC sib	h21c5	47.23	1179.644	72.463	Non
aPKC sib	h21c5	47.23	1033.943	72.463	Non
aPKC sib	h21c5	50.257	895.396	77.09	Non
aPKC sib	h21c5	50.257	662.27	77.09	Non
aPKC sib	h21c5	50.257	528.958	77.09	Non
aPKC sib	h21c5	50.257	415.671	77.09	Non
aPKC sib	h21c5	50.257	339.813	77.09	Non
aPKC sib	h22c1	46.564	966.434	71.432	Non
aPKC sib	h22c1	46.564	922.423	71.432	Non
aPKC sib	h22c1	46.866	880.979	71.892	Non
aPKC sib	h22c1	46.866	743.153	71.892	Non
aPKC sib	h22c1	46.866	620.485	71.892	Non
aPKC sib	h22c1	46.866	531.514	71.892	Non
aPKC sib	h22c2	39.479	1476.01	60.546	Non
aPKC sib	h22c2	39.479	1463.793	60.546	Non
aPKC sib	h22c2	39.479	1310.512	60.546	Non
aPKC sib	h22c2	39.479	1044.634	60.546	Non
aPKC sib	h22c2	39.479	817.277	60.546	Non
aPKC sib	h22c2	39.479	645.943	60.546	Non
aPKC sib	h22c2	39.479	506.874	60.546	Non
aPKC sib	h22c3	48.138	930.25	73.863	Non
aPKC sib	h22c3	52.134	980.579	79.993	Non
aPKC sib	h22c3	52.619	899.114	80.726	Non
aPKC sib	h22c3	55.101	1009.739	84.535	Non
aPKC sib	h22c3	55.101	850.408	84.535	Non
aPKC sib	h22c3	55.343	882.522	84.926	Non
aPKC sib	h22c3	55.343	749.796	84.926	Non
aPKC sib	h22c3	55.343	582.128	84.926	Non
aPKC sib	h22c3	55.343	441.075	84.926	Non
aPKC sib	h22c3	55.343	324.553	84.926	Non
aPKC sib	h22c4	48.804	899.232	74.88	Non
aPKC sib	h22c4	48.804	833.734	74.88	Non
aPKC sib	h22c4	48.804	755.302	74.88	Non
aPKC sib	h22c4	47.351	677.806	72.632	Non
aPKC sib	h22c4	47.351	597.189	72.632	Non
aPKC sib	h22c4	47.351	597.189	72.632	Non
aPKC sib	h22c4	47.351	519.004	72.632	Non
aPKC sib	h22c4	47.351	417.233	72.632	Non
aPKC sib	h22c4	47.351	332.17	72.632	Non
aPKC sib	h22c4	47.351	262.492	72.632	Non
aPKC sib	h23c1	40.872	1194.95	62.689	Non
aPKC sib	h23c1	40.872	1203.217	62.689	Non
aPKC sib	h23c1	40.872	1134.365	62.689	Non
aPKC sib	h23c1	40.872	986.684	62.689	Non
aPKC sib	h23c1	40.872	805.976	62.689	Non
aPKC sib	h23c1	40.872	616.173	62.689	Non
aPKC sib	h23c1	40.872	510.076	62.689	Non
aPKC sib	h23c2	47.108	1160.488	72.268	Non
aPKC sib	h23c2	47.108	1192.854	72.268	Non
aPKC sib	h23c2	47.108	1103.054	72.268	Non
aPKC sib	h23c2	47.956	979.814	73.575	Non
aPKC sib	h23c2	47.956	806.958	73.575	Non
aPKC sib	h23c2	47.956	613.262	73.575	Non
aPKC sib	h23c2	47.956	474.182	73.575	Non
aPKC sib	h23c2	47.956	381.667	73.575	Non
aPKC sib	h23c3	36.028	1234.185	55.246	Non
aPKC sib	h23c3	36.028	1339.599	55.246	Non
aPKC sib	h23c3	36.028	1308.672	55.246	Non
aPKC sib	h23c3	35.785	1223.563	54.872	Non
aPKC sib	h23c3	35.785	1024.555	54.872	Non
aPKC sib	h23c3	35.785	748.665	54.872	Non
aPKC sib	h23c3	35.785	629.897	54.872	Non
aPKC sib	h23c3	35.785	441.135	54.872	Non
aPKC sib	h23c3	35.785	344.797	54.872	Non
aPKC sib	h23c3	35.785	237.315	54.872	Non
aPKC sib	h23c4	56.736	1263.49	87.065	Non
aPKC sib	h23c4	56.736	1211.198	87.065	Non
aPKC sib	h23c4	56.736	1049.227	87.065	Non
aPKC sib	h23c4	56.736	825.965	87.065	Non
aPKC sib	h23c4	56.736	630.419	87.065	Non
aPKC sib	h23c4	56.736	503.534	87.065	Non
aPKC sib	h23c4	56.736	409.823	87.065	Non
aPKC sib	h23c4	56.736	328.615	87.065	Non
aPKC sib	h23c5	39.479	1131.102	60.547	Non
aPKC sib	h23c5	39.479	1168.958	60.547	Non
aPKC sib	h23c5	39.479	1103.479	60.547	Non
aPKC sib	h23c5	39.6	1063.862	60.727	Non
aPKC sib	h23c5	39.6	913.035	60.727	Non
aPKC sib	h23c5	39.6	691.906	60.727	Non
aPKC sib	h23c5	39.6	499.41	60.727	Non
aPKC sib	h23c5	39.6	391.893	60.727	Non
aPKC sib	h23c5	39.6	308.341	60.727	Non
aPKC sib	h24c1	46.624	1311.374	71.533	Non
aPKC sib	h24c1	46.624	1361.442	71.533	Non
aPKC sib	h24c1	46.2	1409.594	70.882	Non
aPKC sib	h24c1	46.2	1314.457	70.882	Non
aPKC sib	h24c1	46.2	1173.554	70.882	Non
aPKC sib	h24c1	46.2	990.596	70.882	Non
aPKC sib	h24c1	46.503	898.053	71.346	Non
aPKC sib	h24c1	46.503	680.486	71.346	Non
aPKC sib	h24c1	46.503	511.639	71.346	Non
aPKC sib	h24c1	46.503	396.792	71.346	Non
aPKC sib	h24c2	40.085	1018.677	61.487	Non
aPKC sib	h24c2	40.085	1010.193	61.487	Non
aPKC sib	h24c2	40.448	1018.848	62.036	Non
aPKC sib	h24c2	40.448	953.254	62.036	Non
aPKC sib	h24c2	41.841	1023.597	64.184	Non
aPKC sib	h24c2	41.841	917.943	64.184	Non
aPKC sib	h24c2	41.841	800.268	64.184	Non
aPKC sib	h24c2	41.841	649.205	64.184	Non
aPKC sib	h24c3	33.242	1241.025	50.967	Non
aPKC sib	h24c3	33.242	1232.024	50.967	Non
aPKC sib	h24c3	33.242	1187.868	50.967	Non
aPKC sib	h24c3	33.242	1106.61	50.967	Non
aPKC sib	h24c3	33.606	1214.877	51.531	Non
aPKC sib	h24c3	33.606	1033.262	51.531	Non
aPKC sib	h24c3	33.606	813.5	51.531	Non
aPKC sib	h24c3	33.606	612.069	51.531	Non
aPKC sib	h24c3	33.606	465.915	51.531	Non
aPKC sib	h24c3	33.606	332.177	51.531	Non
aPKC sib	h24c3	33.606	252.385	51.531	Non
aPKC sib	h24c4	44.263	1516.333	67.905	Non
aPKC sib	h24c4	44.263	1570.684	67.905	Non
aPKC sib	h24c4	44.263	1517.693	67.905	Non
aPKC sib	h24c4	44.263	1397.933	67.905	Non
aPKC sib	h24c4	45.292	1423.38	69.478	Non
aPKC sib	h24c4	45.292	1267.338	69.478	Non
aPKC sib	h24c4	45.292	1114.876	69.478	Non
aPKC sib	h24c4	45.292	964.807	69.478	Non
aPKC sib	h24c4	45.292	813.967	69.478	Non
aPKC sib	h24c4	45.292	667.112	69.478	Non
aPKC sib	h24c4	45.292	522.891	69.478	Non
aPKC sib	h24c4	45.292	425.748	69.478	Non
aPKC mut	h21c1	59.642	902.741	91.527	Non
aPKC mut	h21c1	59.642	878.563	91.527	Non
aPKC mut	h21c1	59.642	812.543	91.527	Non
aPKC mut	h21c1	62.67	668.38	96.186	Non
aPKC mut	h21c1	62.67	485.158	96.186	Non
aPKC mut	h21c1	62.67	356.333	96.186	Non
aPKC mut	h21c2	35.18	759.734	53.941	Non
aPKC mut	h21c2	35.18	771.817	53.941	Non
aPKC mut	h21c2	49.531	723.386	75.978	Non
aPKC mut	h21c2	49.531	660.636	75.978	Non
aPKC mut	h21c2	49.531	528.846	75.978	Non
aPKC mut	h21c2	49.531	428.546	75.978	Non
aPKC mut	h21c2	49.531	338.64	75.978	Non
aPKC mut	h21c2	49.531	282.317	75.978	Non
aPKC mut	h21c3	48.259	848.544	74.049	Non
aPKC mut	h21c3	48.259	819.523	74.049	Non
aPKC mut	h21c3	48.259	736.891	74.049	Non
aPKC mut	h21c3	49.409	859.203	75.791	Non
aPKC mut	h21c3	49.409	818.711	75.791	Non
aPKC mut	h21c3	49.409	748.065	75.791	Non
aPKC mut	h21c3	49.409	653.358	75.791	Non
aPKC mut	h21c3	49.409	520.423	75.791	Non
aPKC mut	h21c3	49.409	400.702	75.791	Non
aPKC mut	h21c3	49.409	287.412	75.791	Non
aPKC mut	h21c3	49.409	210.38	75.791	Non
aPKC mut	h21c4	46.261	582.48	70.961	Non
aPKC mut	h21c4	46.261	562.829	70.961	Non
aPKC mut	h21c4	46.261	522.728	70.961	Non
aPKC mut	h21c4	45.11	748.289	69.195	Non
aPKC mut	h21c4	45.11	673.2	69.195	Non
aPKC mut	h21c4	45.11	570.358	69.195	Non
aPKC mut	h21c4	45.11	466.467	69.195	Non
aPKC mut	h21c4	45.11	357.606	69.195	Non
aPKC mut	h21c4	45.11	262.767	69.195	Non
aPKC mut	h21c4	45.11	208.764	69.195	Non
aPKC mut	h22c1	43.96	741.169	67.423	Non
aPKC mut	h22c1	44.141	771.731	67.71	Non
aPKC mut	h22c1	44.141	799.195	67.717	Non
aPKC mut	h22c1	44.141	700.113	67.717	Non
aPKC mut	h22c1	44.141	547.257	67.717	Non
aPKC mut	h22c1	44.141	401.646	67.717	Non
aPKC mut	h22c1	44.141	334.161	67.717	Non
aPKC mut	h22c2	54.011	941.632	82.854	Non
aPKC mut	h22c2	54.011	987.556	82.854	Non
aPKC mut	h22c2	55.283	936.019	84.833	Non
aPKC mut	h22c2	55.283	775.449	84.833	Non
aPKC mut	h22c2	55.283	631.123	84.833	Non
aPKC mut	h22c2	55.283	507.575	84.833	Non
aPKC mut	h22c2	55.283	374.613	84.833	Non
aPKC mut	h22c2	55.283	273.32	84.833	Non
aPKC mut	h22c3	44.384	859.355	68.089	Non
aPKC mut	h22c3	44.384	895.187	68.089	Non
aPKC mut	h22c3	44.384	850.551	68.089	Non
aPKC mut	h22c3	44.384	787.81	68.089	Non
aPKC mut	h22c3	44.384	603.51	68.089	Non
aPKC mut	h22c3	44.384	437.617	68.089	Non
aPKC mut	h22c3	44.384	286.457	68.089	Non
aPKC mut	h22c3	44.384	228.35	68.089	Non
aPKC mut	h22c4	29.973	870.321	45.958	Non
aPKC mut	h22c4	29.973	854.315	45.958	Non
aPKC mut	h22c4	29.973	794.849	45.958	Non
aPKC mut	h22c4	34.514	693.311	52.921	Non
aPKC mut	h22c4	34.514	569.234	52.921	Non
aPKC mut	h22c4	34.514	418.112	52.921	Non
aPKC mut	h22c4	34.514	347.349	52.921	Non
aPKC mut	h22c5	55.586	558.986	85.302	Non
aPKC mut	h22c5	55.586	574.712	85.302	Non
aPKC mut	h22c5	55.586	546.137	85.302	Non
aPKC mut	h22c5	55.586	499.323	85.302	Non
aPKC mut	h22c5	54.677	439.063	83.914	Non
aPKC mut	h22c5	54.677	332.765	83.914	Non
aPKC mut	h22c5	54.677	251.888	83.914	Non
aPKC mut	h22c5	54.677	182.666	83.914	Non
aPKC mut	h22c5	54.677	153.59	83.914	Non
aPKC mut	h22c6	46.321	894.879	71.062	Non
aPKC mut	h22c6	46.321	933.904	71.062	Non
aPKC mut	h22c6	46.321	907.018	71.062	Non
aPKC mut	h22c6	46.321	751.814	71.07	Non
aPKC mut	h22c6	46.321	512.746	71.07	Non
aPKC mut	h22c6	46.321	308.197	71.07	Non
aPKC mut	h22c6	46.321	231.317	71.07	Non
aPKC mut	h22c6	46.321	182.107	71.07	Non
aPKC mut	h22c6	46.321	154.145	71.07	Non
aPKC sib	h25c1	49.712	1118.211	73.947	Non
aPKC sib	h25c1	49.712	1138.014	73.947	Non
aPKC sib	h25c1	49.409	1125.081	77.014	Non
aPKC sib	h25c1	47.472	1060.95	77.014	Non
aPKC sib	h25c1	49.833	1039.539	77.014	Non
aPKC sib	h25c1	49.591	966.387	77.014	Non
aPKC sib	h25c1	49.349	808.254	77.014	Non
aPKC sib	h25c2	48.622	1161.812	74.582	Non
aPKC sib	h25c2	48.622	1249.49	74.582	Non
aPKC sib	h25c2	48.38	1068.314	74.234	Non
aPKC sib	h25c2	48.38	809.315	74.234	Non
aPKC sib	h25c2	48.38	642.22	74.234	Non
aPKC sib	h25c2	48.38	513.895	74.234	Non
aPKC sib	h25c3	44.263	1134.678	63.537	Non
aPKC sib	h25c3	44.323	1166.968	63.537	Non
aPKC sib	h25c3	44.444	1144.852	63.537	Non
aPKC sib	h25c3	46.927	1131.891	69.862	Non
aPKC sib	h25c3	46.927	932.18	69.862	Non
aPKC sib	h25c3	46.927	686.399	69.862	Non
aPKC sib	h25c4	47.169	1012.098	63.163	Non
aPKC sib	h25c4	47.169	1067.118	66.692	Non
aPKC sib	h25c4	44.02	1230.999	61.767	Non
aPKC sib	h25c4	44.141	1257.922	61.767	Non
aPKC sib	h25c4	44.141	1048.465	61.767	Non
aPKC sib	h25c4	44.141	752.085	61.767	Non
aPKC sib	h25c4	44.141	560.857	61.767	Non
aPKC sib	h25c4	44.141	453.354	61.767	Non
aPKC sib	h26c1	46.14	1016.985	70.779	Non
aPKC sib	h26c1	46.442	1059.03	71.249	Non
aPKC sib	h26c1	46.442	978.618	71.249	Non
aPKC sib	h26c1	46.442	910.838	71.249	Non
aPKC sib	h26c1	46.442	762.846	71.249	Non
aPKC sib	h26c2	47.472	1268.557	72.841	Non
aPKC sib	h26c2	48.501	1061.278	74.423	Non
aPKC sib	h26c2	46.503	894.518	71.342	Non
aPKC sib	h26c2	46.503	760.199	71.342	Non
aPKC sib	h26c3	46.261	1181.928	70.963	Non
aPKC sib	h26c3	46.261	1323.894	70.963	Non
aPKC sib	h26c3	46.261	1131.586	70.963	Non
aPKC sib	h26c3	46.261	988.489	70.963	Non
aPKC sib	h26c3	46.261	756.563	70.963	Non
aPKC sib	h26c4	48.259	1662.488	74.037	Non
aPKC sib	h26c4	47.775	1701.526	73.294	Non
aPKC sib	h26c4	46.806	1468.229	71.814	Non
aPKC sib	h26c4	45.958	1081.887	70.502	Non
aPKC sib	h26c4	45.958	891.868	70.502	Non
aPKC sib	h26c5	48.986	1169.8	75.147	Non
aPKC sib	h26c5	48.864	1115.054	74.951	Non
aPKC sib	h26c5	51.347	944.545	78.794	Non
aPKC sib	h26c5	51.347	845.266	78.794	Non
aPKC sib	h26c5	51.347	784.434	78.783	Non
aPKC sib	h26c5	51.347	666.96	78.783	Non
aPKC sib	h26c5	51.347	541.82	78.783	Non
aPKC sib	h27c1	39.54	1347.902	60.642	Non
aPKC sib	h27c1	39.54	1221.915	60.642	Non
aPKC sib	h27c1	39.54	1105.257	60.642	Non
aPKC sib	h27c1	39.54	875.317	60.642	Non
aPKC sib	h27c1	39.54	638.221	60.642	Non
aPKC sib	h27c2	44.747	1580.241	68.638	Non
aPKC sib	h27c2	44.081	1491.693	67.633	Non
aPKC sib	h27c2	44.989	1239.618	69.022	Non
aPKC sib	h27c2	44.989	876.923	69.022	Non
aPKC sib	h27c2	44.989	731.996	69.022	Non
aPKC sib	h27c2	44.989	627.759	69.022	Non
aPKC sib	h27c3	42.325	1548.191	64.93	Non
aPKC sib	h27c3	42.325	1463.612	64.93	Non
aPKC sib	h27c3	42.325	1071.741	64.93	Non
aPKC sib	h27c3	42.325	727.051	64.93	Non
aPKC sib	h27c4	45.353	1388.629	69.568	Non
aPKC sib	h27c4	45.776	1214.621	70.224	Non
aPKC sib	h27c4	45.776	1047.722	70.224	Non
aPKC sib	h27c4	46.685	957.295	71.633	Non
aPKC sib	h27c4	46.685	665.856	71.633	Non
aPKC sib	h27c4	46.685	517.873	71.633	Non
aPKC sib	h28c1	38.813	584.049	59.521	Non
aPKC sib	h28c1	38.389	543.307	58.875	Non
aPKC sib	h28c1	42.083	665.562	60.271	Non
aPKC sib	h28c1	42.749	600.302	64.55	Non
aPKC sib	h28c1	42.749	471.178	65.574	Non
aPKC sib	h28c2	55.646	684.899	85.4	Non
aPKC sib	h28c2	54.859	708.565	84.172	Non
aPKC sib	h28c2	54.859	542.129	84.172	Non
aPKC sib	h28c2	54.859	405.658	84.172	Non
aPKC sib	h28c2	54.859	283.441	84.172	Non
aPKC sib	h28c3	47.472	738.741	72.82	Non
aPKC sib	h28c3	46.442	763.282	71.255	Non
aPKC sib	h28c3	45.897	680.556	70.405	Non
aPKC sib	h28c3	45.11	613.786	69.202	Non
aPKC sib	h28c3	45.958	525.35	70.504	Non
aPKC sib	h28c3	45.958	362.716	70.504	Non
aPKC sib	h28c4	44.141	945.722	67.72	Non
aPKC sib	h28c4	44.141	790.765	67.72	Non
aPKC sib	h28c4	46.14	600.573	70.779	Non
aPKC sib	h28c4	46.14	491.824	70.779	Non
aPKC sib	h28c4	46.14	400.331	70.779	Non
aPKC sib	h28c5	43.718	1147.296	67.072	Non
aPKC sib	h28c5	44.202	1064.06	67.812	Non
aPKC sib	h28c5	44.444	946.598	68.184	Non
aPKC sib	h28c5	44.444	689.381	68.184	Non
aPKC sib	h28c5	44.444	495.262	68.184	Non
aPKC sib	h29c1	48.259	1098.476	74.041	Non
aPKC sib	h29c1	48.198	1267.585	73.951	Non
aPKC sib	h29c1	48.198	1081.577	73.951	Non
aPKC sib	h29c1	48.198	757.926	73.951	Non
aPKC sib	h29c1	48.138	541.574	73.86	Non
aPKC sib	h29c2	48.259	1397.522	74.053	Non
aPKC sib	h29c2	48.138	1363.409	73.854	Non
aPKC sib	h29c2	50.499	1229.57	77.487	Non
aPKC sib	h29c2	50.499	984.526	77.487	Non
aPKC sib	h29c2	50.499	670.394	77.487	Non
aPKC sib	h29c2	50.499	501.49	77.487	Non
aPKC sib	h29c3	49.652	1299.549	76.171	Non
aPKC sib	h29c3	47.411	1312.973	72.752	Non
aPKC sib	h29c3	47.411	992.879	72.752	Non
aPKC sib	h29c3	47.411	613.564	72.752	Non
aPKC sib	h29c3	47.411	433.622	72.752	Non
aPKC sib	h29c3	47.411	286.802	72.752	Non
aPKC sib	h29c4	55.949	1474.604	85.846	Non
aPKC sib	h29c4	55.949	1212.357	85.846	Non
aPKC sib	h29c4	56.433	1021.469	86.608	Non
aPKC sib	h29c4	56.433	776.478	86.608	Non
aPKC sib	h29c4	56.433	632.511	86.608	Non
aPKC sib	h29c4	56.433	457.063	86.608	Non
aPKC sib	h29c5	44.141	1167.876	67.713	Non
aPKC sib	h29c5	44.141	1226.462	67.713	Non
aPKC sib	h29c5	43.96	1189.008	67.444	Non
aPKC sib	h29c5	43.96	962.244	67.444	Non
aPKC sib	h29c5	43.96	825.823	67.444	Non
aPKC sib	h30c1	38.086	1131.051	58.409	Non
aPKC sib	h30c1	39.479	1114.153	60.552	Non
aPKC sib	h30c1	36.633	1258.245	56.178	Non
aPKC sib	h30c1	36.633	1107.135	56.178	Non
aPKC sib	h30c1	36.633	897.465	56.178	Non
aPKC sib	h30c1	36.633	657.08	56.178	Non
aPKC sib	h30c1	36.633	456.858	56.178	Non
aPKC sib	h30c1	36.633	360.163	56.178	Non
aPKC sib	h30c2	35.18	1272.252	53.946	Non
aPKC sib	h30c2	35.18	1167.776	53.946	Non
aPKC sib	h30c2	42.264	994.243	64.827	Non
aPKC sib	h30c2	42.264	922.489	64.827	Non
aPKC sib	h30c2	42.264	752.811	64.827	Non
aPKC sib	h30c2	42.264	582.442	64.827	Non
aPKC sib	h30c2	42.264	479.876	64.827	Non
aPKC sib	h30c3	38.147	1251.105	58.5	Non
aPKC sib	h30c3	38.147	1331.148	58.5	Non
aPKC sib	h30c3	40.266	1491.145	61.755	Non
aPKC sib	h30c3	40.085	1420.941	61.475	Non
aPKC sib	h30c3	40.085	1135.137	61.475	Non
aPKC sib	h30c3	40.085	914.162	61.475	Non
aPKC sib	h30c3	40.085	686.011	61.475	Non
aPKC sib	h30c3	40.085	533.106	61.475	Non
aPKC sib	h30c4	46.261	1274.866	70.954	Non
aPKC sib	h30c4	46.261	1218.951	70.954	Non
aPKC sib	h30c4	46.14	1189.59	70.769	Non
aPKC sib	h30c4	46.14	866.458	70.769	Non
aPKC sib	h30c4	46.14	681.895	70.769	Non
aPKC sib	h30c4	46.14	491.741	70.769	Non
aPKC sib	h30c5	37.42	1641.916	57.396	Non
aPKC sib	h30c5	37.42	1593.531	57.396	Non
aPKC sib	h30c5	40.448	1491.458	62.025	Non
aPKC sib	h30c5	40.448	1263.268	62.025	Non
aPKC sib	h30c5	40.448	957.18	62.025	Non
aPKC sib	h30c5	40.448	689.617	62.025	Non
aPKC sib	h32c1	47.048	674.782	72.192	Non
aPKC sib	h32c1	47.048	688.607	72.192	Non
aPKC sib	h32c1	47.896	651.446	73.483	Non
aPKC sib	h32c1	47.896	514.859	73.483	Non
aPKC sib	h32c1	47.896	430.478	73.483	Non
aPKC sib	h32c1	47.896	357.47	73.483	Non
aPKC sib	h32c1	47.896	300.947	73.483	Non
aPKC sib	h32c2	35.483	658.591	54.413	Non
aPKC sib	h32c2	34.756	758.889	53.293	Non
aPKC sib	h32c2	35.785	732.986	54.877	Non
aPKC sib	h32c2	35.785	632.24	54.877	Non
aPKC sib	h32c2	35.785	549.168	54.877	Non
aPKC sib	h32c2	35.785	469.561	54.877	Non
aPKC sib	h32c2	35.785	407.26	54.877	Non
aPKC sib	h32c3	40.085	691.758	61.478	Non
aPKC sib	h32c3	40.085	716.083	61.478	Non
aPKC sib	h32c3	39.358	680.366	60.368	Non
aPKC sib	h32c3	39.297	593.389	60.278	Non
aPKC sib	h32c3	39.297	530.104	60.278	Non
aPKC sib	h32c3	38.874	454.84	59.62	Non
aPKC sib	h32c4	43.718	727.261	67.069	Non
aPKC sib	h32c4	43.718	713.367	67.069	Non
aPKC sib	h32c4	43.718	566.066	67.069	Non
aPKC sib	h32c4	43.718	449.43	67.069	Non
aPKC sib	h32c4	43.718	366.263	67.069	Non
aPKC sib	h32c4	43.718	319.478	67.069	Non
aPKC mut	h23c1	52.074	755.502	79.893	Non
aPKC mut	h23c1	54.617	871.658	83.804	Non
aPKC mut	h23c1	53.89	925.865	82.685	Non
aPKC mut	h23c1	53.89	818.003	82.685	Non
aPKC mut	h23c1	54.556	684.858	83.707	Non
aPKC mut	h23c1	54.556	495.035	83.707	Non
aPKC mut	h23c2	49.167	839.104	75.434	Non
aPKC mut	h23c2	48.804	1071.913	74.871	Non
aPKC mut	h23c2	48.804	1096.15	74.871	Non
aPKC mut	h23c2	48.804	942.489	74.871	Non
aPKC mut	h23c2	48.804	714.182	74.871	Non
aPKC mut	h23c2	48.804	523.459	74.871	Non
aPKC mut	h23c2	48.804	377.862	74.871	Non
aPKC mut	h23c3	47.896	959.395	73.488	Non
aPKC mut	h23c3	47.896	939.658	73.488	Non
aPKC mut	h23c3	48.925	811.197	75.076	Non
aPKC mut	h23c3	49.349	673.015	75.713	Non
aPKC mut	h23c3	50.681	707.923	77.757	Non
aPKC mut	h23c3	52.195	505.206	80.088	Non
aPKC mut	h23c3	52.195	432.037	80.088	Non
aPKC mut	h23c4	48.32	840.422	74.137	Non
aPKC mut	h23c4	48.986	815.596	75.157	Non
aPKC mut	h23c4	51.165	754.267	78.496	Non
aPKC mut	h23c4	51.165	676.75	78.496	Non
aPKC mut	h23c4	49.652	605.375	76.168	Non
aPKC mut	h23c4	47.593	577.226	73.008	Non
aPKC mut	h23c4	47.593	453.271	73.008	Non
aPKC mut	h23c4	47.593	344.755	73.008	Non
aPKC mut	h24c1	55.949	666.579	85.839	Non
aPKC mut	h24c1	55.828	627.055	85.664	Non
aPKC mut	h24c1	55.828	470.678	85.664	Non
aPKC mut	h24c1	55.828	324.692	85.664	Non
aPKC mut	h24c2	44.505	537.906	68.28	Non
aPKC mut	h24c2	44.505	575.495	68.28	Non
aPKC mut	h24c2	44.081	640.395	67.617	Non
aPKC mut	h24c2	44.081	616.341	67.617	Non
aPKC mut	h24c2	44.202	502.481	67.811	Non
aPKC mut	h24c2	45.897	487.592	70.403	Non
aPKC mut	h24c3	58.795	557.268	90.22	Non
aPKC mut	h24c3	58.25	524.259	89.394	Non
aPKC mut	h24c3	62.367	468.824	95.721	Non
aPKC mut	h24c3	62.367	361.236	95.721	Non
aPKC mut	h24c4	44.444	681.389	68.165	Non
aPKC mut	h24c4	44.444	652.948	68.165	Non
aPKC mut	h24c4	44.444	557.657	68.165	Non
aPKC mut	h24c4	44.444	479.425	68.165	Non
aPKC mut	h24c4	44.444	408.529	68.165	Non
aPKC mut	h24c4	44.444	302.291	68.165	Non
aPKC mut	h24c4	44.444	231.747	68.165	Non
aPKC mut	h25c1	41.901	1051.779	64.258	Non
aPKC mut	h25c1	42.749	1300.359	65.578	Non
aPKC mut	h25c1	47.048	1444.545	72.168	Non
aPKC mut	h25c1	46.503	1370.249	71.338	Non
aPKC mut	h25c1	49.954	1213.229	76.626	Non
aPKC mut	h25c1	49.954	986.63	76.626	Non
aPKC mut	h25c1	49.954	773.686	76.626	Non
aPKC mut	h25c1	49.954	549.538	76.626	Non
aPKC mut	h25c2	37.118	1099.676	56.922	Non
aPKC mut	h25c2	38.813	1154.616	59.526	Non
aPKC mut	h25c2	38.813	1127.075	59.526	Non
aPKC mut	h25c2	38.813	1033.657	59.526	Non
aPKC mut	h25c2	38.813	893.145	59.526	Non
aPKC mut	h25c2	38.813	645.608	59.526	Non
aPKC mut	h25c3	32.031	1400.582	49.106	Non
aPKC mut	h25c3	35.18	1418.342	53.941	Non
aPKC mut	h25c3	39.842	1296.195	61.116	Non
aPKC mut	h25c3	39.842	1088.722	61.116	Non
aPKC mut	h25c3	39.842	856.53	61.116	Non
aPKC mut	h25c3	39.842	698.06	61.116	Non
aPKC mut	h25c3	39.842	545.102	61.116	Non
aPKC mut	h25c4	43.294	1026.051	66.403	Non
aPKC mut	h25c4	43.839	800.087	67.244	Non
aPKC mut	h25c4	43.415	650.218	66.598	Non
aPKC mut	h25c4	43.415	504.535	66.604	Non
aPKC mut	h25c4	48.259	464.465	74.042	Non
aPKC mut	h25c4	48.259	408.25	74.042	Non
aPKC mut	h26c1	37.36	724.631	57.299	Non
aPKC mut	h26c1	36.936	759.689	56.653	Non
aPKC mut	h26c1	42.264	784.189	64.838	Non
aPKC mut	h26c1	42.264	770.925	64.838	Non
aPKC mut	h26c1	47.532	745.05	72.928	Non
aPKC mut	h26c1	47.532	697.435	72.928	Non
aPKC mut	h26c1	47.532	475.131	72.928	Non
aPKC mut	h26c1	47.532	303.741	72.928	Non
aPKC mut	h26c1	47.532	200.726	72.928	Non
aPKC mut	h26c2	35.301	601.183	54.128	Non
aPKC mut	h26c2	36.694	710.022	56.281	Non
aPKC mut	h26c2	36.088	714.502	55.345	Non
aPKC mut	h26c2	41.538	784.683	63.731	Non
aPKC mut	h26c2	41.659	773.428	63.896	Non
aPKC mut	h26c2	41.659	661.832	63.896	Non
aPKC mut	h26c2	41.659	565.908	63.896	Non
aPKC mut	h26c2	41.659	487.933	63.896	Non
aPKC mut	h26c2	41.659	416.85	63.896	Non
aPKC mut	h26c3	29.912	677.293	45.846	Non
aPKC mut	h26c3	31.426	666.124	48.179	Non
aPKC mut	h26c3	44.323	644.658	67.988	Non
aPKC mut	h26c3	46.685	597.226	71.622	Non
aPKC mut	h26c3	46.14	564.677	70.785	Non
aPKC mut	h26c3	43.294	480.693	66.403	Non
aPKC mut	h26c3	43.294	408.985	66.403	Non
aPKC mut	h26c3	43.294	317.742	66.403	Non
aPKC mut	h26c4	36.573	818.323	56.086	Non
aPKC mut	h26c4	37.42	715.522	57.391	Non
aPKC mut	h26c4	37.42	669.934	57.391	Non
aPKC mut	h26c4	39.963	573.786	61.296	Non
aPKC mut	h26c4	39.963	430.498	61.296	Non
aPKC mut	h27c1	32.455	514.061	49.758	Non
aPKC mut	h27c1	36.875	592.788	56.541	Non
aPKC mut	h27c1	37.844	584.551	58.045	Non
aPKC mut	h27c1	42.083	626.028	64.554	Non
aPKC mut	h27c1	43.112	665.895	66.13	Non
aPKC mut	h27c1	43.112	662.945	66.13	Non
aPKC mut	h27c1	43.112	560.372	66.13	Non
aPKC mut	h27c1	43.112	426.937	66.13	Non
aPKC mut	h27c1	43.112	357.499	66.13	Non
aPKC mut	h27c2	29.852	569.361	45.751	Non
aPKC mut	h27c2	29.852	567.75	45.751	Non
aPKC mut	h27c2	31.668	524.178	48.55	Non
aPKC mut	h27c2	40.448	525.508	62.04	Non
aPKC mut	h27c2	41.901	593.837	64.273	Non
aPKC mut	h27c2	41.901	568.021	64.273	Non
aPKC mut	h27c2	39.419	590.341	60.453	Non
aPKC mut	h27c2	39.419	562.33	60.453	Non
aPKC mut	h27c2	39.419	458.926	60.453	Non
aPKC mut	h27c2	39.419	355.074	60.453	Non
aPKC mut	h27c2	39.419	305.434	60.453	Non
aPKC mut	h27c3	36.573	541.106	56.086	Non
aPKC mut	h27c3	40.63	580.573	62.325	Non
aPKC mut	h27c3	40.63	578.622	62.325	Non
aPKC mut	h27c3	42.022	559.506	64.456	Non
aPKC mut	h27c3	42.022	551.512	64.446	Non
aPKC mut	h27c3	42.507	554.401	65.196	Non
aPKC mut	h27c3	43.112	548.589	66.133	Non
aPKC mut	h27c3	34.877	600.211	53.474	Non
aPKC mut	h27c4	48.986	821.969	75.161	Non
aPKC mut	h27c4	48.986	815.985	75.161	Non
aPKC mut	h27c4	47.048	811.618	72.182	Non
aPKC mut	h27c4	49.409	739.581	75.793	Non
aPKC mut	h27c4	49.409	481.275	75.793	Non
aPKC mut	h27c4	49.409	421.205	75.793	Non
aPKC mut	h27c4	49.591	291.723	76.082	Non
aPKC mut	h28c1	43.778	1274.94	67.151	Non
aPKC mut	h28c1	44.747	1440.118	68.625	Non
aPKC mut	h28c1	47.411	1314.347	72.722	Non
aPKC mut	h28c1	47.411	1134.592	72.722	Non
aPKC mut	h28c1	47.411	696.17	72.722	Non
aPKC mut	h28c1	47.411	442.409	72.722	Non
aPKC mut	h28c2	41.114	1133.027	63.062	Non
aPKC mut	h28c2	41.114	955.811	63.062	Non
aPKC mut	h28c2	41.901	736.95	64.273	Non
aPKC mut	h28c2	42.567	616.035	65.318	Non
aPKC mut	h28c3	42.204	1181.639	64.745	Non
aPKC mut	h28c3	45.716	1193.278	70.139	Non
aPKC mut	h28c3	49.954	1114.05	76.65	Non
aPKC mut	h28c3	49.954	961.346	76.65	Non
aPKC mut	h28c3	49.954	787.795	76.65	Non
aPKC mut	h28c4	32.637	1405.98	50.042	Non
aPKC mut	h28c4	33.666	1415.653	51.625	Non
aPKC mut	h28c4	36.088	1328.309	55.348	Non
aPKC mut	h28c4	36.088	1145.815	55.348	Non
aPKC mut	h28c4	37.663	899.935	57.765	Non
aPKC mut	h28c4	37.663	816.301	57.765	Non
aPKC mut	h28c5	48.077	1457.722	73.768	Non
aPKC mut	h28c5	48.864	1448.065	74.95	Non
aPKC mut	h28c5	52.134	1316.426	79.983	Non
aPKC mut	h28c5	52.619	1138.719	80.73	Non
aPKC mut	h28c5	52.619	940.107	80.73	Non
aPKC mut	h28c5	52.619	652.968	80.73	Non
aPKC mut	h28c5	52.619	493.73	80.73	Non
aPKC mut	h29c1	43.778	1037.279	67.156	Non
aPKC mut	h29c1	43.778	986.356	67.156	Non
aPKC mut	h29c1	43.536	865.545	66.79	Non
aPKC mut	h29c1	44.808	839.808	68.743	Non
aPKC mut	h29c1	44.808	707.495	68.743	Non
aPKC mut	h29c1	44.808	530.736	68.743	Non
aPKC mut	h29c2	46.927	1178.344	71.98	Non
aPKC mut	h29c2	46.927	1035.892	71.98	Non
aPKC mut	h29c2	46.927	729.026	71.98	Non
aPKC mut	h29c2	46.927	529.797	71.98	Non
aPKC mut	h29c3	32.455	722.899	49.766	Non
aPKC mut	h29c3	32.455	664.711	49.766	Non
aPKC mut	h29c3	37.602	800.711	57.676	Non
aPKC mut	h29c3	37.299	733.901	57.207	Non
aPKC mut	h29c3	38.571	640.597	59.161	Non
aPKC mut	h29c3	36.209	564.99	55.516	Non
aPKC mut	h29c4	27.793	758.175	42.6	Non
aPKC mut	h29c4	27.672	735.621	42.407	Non
aPKC mut	h29c4	30.094	615.107	46.127	Non
aPKC mut	h29c4	31.063	488.906	47.617	Non
aPKC mut	h30c1	50.56	846.773	77.576	Non
aPKC mut	h30c1	50.56	835.492	77.576	Non
aPKC mut	h30c1	48.259	840.539	74.039	Non
aPKC mut	h30c1	50.56	846.773	77.576	Non
aPKC mut	h30c1	50.56	835.492	77.576	Non
aPKC mut	h30c1	48.259	840.539	74.039	Non
aPKC mut	h30c1	48.986	711.025	75.158	Non
aPKC mut	h30c1	49.652	586.97	76.176	Non
aPKC mut	h30c1	49.652	438.171	76.176	Non
aPKC mut	h30c2	40.993	909.17	62.868	Non
aPKC mut	h30c2	40.993	881.058	62.868	Non
aPKC mut	h30c2	41.659	746.378	63.917	Non
aPKC mut	h30c2	41.659	597.177	63.917	Non
aPKC mut	h30c2	41.841	561.342	64.178	Non
aPKC mut	h30c2	41.841	516.66	64.178	Non
aPKC mut	h30c2	41.841	451.462	64.178	Non
aPKC mut	h30c3	31.123	717.309	47.72	Non
aPKC mut	h30c3	35.18	810.831	53.943	Non
aPKC mut	h30c3	36.997	929.304	56.743	Non
aPKC mut	h30c3	36.754	956.91	56.373	Non
aPKC mut	h30c3	36.27	977.24	55.633	Non
aPKC mut	h30c3	36.27	891.724	55.633	Non
aPKC mut	h30c3	36.27	727.151	55.633	Non
[truncated: 21 more rows]
