# Supplementary material for: Stepwise polarisation of developing bilayered epidermis is mediated by aPKC and E-cadherin in zebrafish
Source: eLife. 2020 Jan 22;9:e49064. doi: 10.7554/eLife.49064 (PMC6975926; doi:10.7554/eLife.49064)
Supplement: Figure 3—source data 1. [file elife-49064-fig3-data1.csv]

Genotype	Cell name	Mean	Area	Length	Boundary
Penner sib	h10c1	124.499	47.775	73.285	Non
Penner sib	h10c1	164.998	47.775	73.285	Non
Penner sib	h10c1	233.272	49.591	76.079	Non
Penner sib	h10c1	277.644	49.591	76.079	Non
Penner sib	h10c1	330.238	49.591	76.079	Non
Penner sib	h10c1	377.818	49.107	75.324	Non
Penner sib	h10c1	461.435	49.107	75.324	Non
Penner sib	h10c1	565.473	49.833	76.455	Non
Penner sib	h10c1	583.69	49.833	76.455	Non
Penner sib	h10c1	553.783	49.833	76.455	Non
Penner sib	h10c1	561.587	48.017	73.677	Non
Penner sib	h10c1	494.945	48.017	73.677	Non
Penner sib	h10c2	91.014	58.31	89.488	Non
Penner sib	h10c2	154.647	58.31	89.488	Non
Penner sib	h10c2	192.715	58.31	89.488	Non
Penner sib	h10c2	184.848	59.703	91.632	Non
Penner sib	h10c2	233.255	59.703	91.632	Non
Penner sib	h10c2	277.011	59.703	91.632	Non
Penner sib	h10c2	341.692	59.703	91.632	Non
Penner sib	h10c2	465.101	57.705	88.552	Non
Penner sib	h10c2	529.338	57.402	88.086	Non
Penner sib	h10c2	550.896	57.402	88.086	Non
Penner sib	h10c2	532.715	57.402	88.086	Non
Penner sib	h10c3	102.378	48.501	74.423	Non
Penner sib	h10c3	136.192	48.501	74.423	Non
Penner sib	h10c3	194.76	48.501	74.423	Non
Penner sib	h10c3	225.633	50.863	78.045	Non
Penner sib	h10c3	278.939	50.863	78.045	Non
Penner sib	h10c3	317.385	50.863	78.045	Non
Penner sib	h10c3	362.707	50.984	78.225	Non
Penner sib	h10c3	441.6	50.984	78.225	Non
Penner sib	h10c3	466.906	50.984	78.225	Non
Penner sib	h10c3	476.354	50.984	78.225	Non
Penner sib	h10c4	141.508	53.587	82.224	Non
Penner sib	h10c4	202.611	53.587	82.224	Non
Penner sib	h10c4	259.658	53.587	82.224	Non
Penner sib	h10c4	336.007	53.527	82.124	Non
Penner sib	h10c4	430.52	53.527	82.124	Non
Penner sib	h10c4	494.961	53.527	82.124	Non
Penner sib	h10c4	563.596	53.527	82.124	Non
Penner sib	h10c4	673.053	54.435	83.542	Non
Penner sib	h10c4	754.218	54.556	83.706	Non
Penner sib	h10c4	720.821	54.556	83.706	Non
Penner sib	h10c4	665.636	54.556	83.706	Non
Penner sib	h11c1	182.885	47.928	77.853	Non
Penner sib	h11c1	216.232	47.928	77.853	Non
Penner sib	h11c1	231.079	47.55	77.218	Non
Penner sib	h11c1	280.963	47.55	77.218	Non
Penner sib	h11c1	411.083	46.037	74.782	Non
Penner sib	h11c1	417.282	40.796	66.254	Non
Penner sib	h11c2	137.155	46.902	76.181	Non
Penner sib	h11c2	201.06	46.902	76.181	Non
Penner sib	h11c2	212.161	46.902	76.181	Non
Penner sib	h11c2	257.426	46.902	76.181	Non
Penner sib	h11c2	380.425	45.767	74.34	Non
Penner sib	h11c2	403.899	41.768	67.833	Non
Penner sib	h11c3	73.237	47.658	77.409	Non
Penner sib	h11c3	151.988	47.658	77.409	Non
Penner sib	h11c3	173.804	47.658	77.409	Non
Penner sib	h11c3	199.179	47.658	77.409	Non
Penner sib	h11c3	246.218	47.658	77.409	Non
Penner sib	h11c3	331.672	47.28	76.801	Non
Penner sib	h11c3	380.982	45.713	74.242	Non
Penner sib	h11c3	349.447	45.713	74.242	Non
Penner sib	h11c4	141.985	50.576	82.153	Non
Penner sib	h11c4	231.54	52.629	85.499	Non
Penner sib	h11c4	230.356	52.629	85.499	Non
Penner sib	h11c4	249.401	52.629	85.499	Non
Penner sib	h11c4	302.24	52.629	85.499	Non
Penner sib	h11c4	367.156	52.629	85.499	Non
Penner sib	h11c4	397.201	48.144	78.198	Non
Penner sib	h11c4	413.742	48.144	78.198	Non
Penner sib	h12c1	55.703	55.709	90.503	Non
Penner sib	h12c1	105.014	55.709	90.503	Non
Penner sib	h12c1	133.102	55.763	90.598	Non
Penner sib	h12c1	153.652	55.763	90.598	Non
Penner sib	h12c1	218.984	55.763	90.598	Non
Penner sib	h12c1	284.362	55.763	90.58	Non
Penner sib	h12c2	93.42	52.737	85.653	Non
Penner sib	h12c2	135.412	52.737	85.653	Non
Penner sib	h12c2	176	52.737	85.653	Non
Penner sib	h12c2	286.385	51.603	83.834	Non
Penner sib	h12c2	389.501	51.603	83.834	Non
Penner sib	h12c2	362.025	46.199	75.041	Non
Penner sib	h12c3	78.82	60.572	98.415	Non
Penner sib	h12c3	133.965	60.572	98.415	Non
Penner sib	h12c3	190.86	60.572	98.415	Non
Penner sib	h12c3	290.249	60.572	98.415	Non
Penner sib	h12c3	391.475	54.629	88.737	Non
Penner sib	h12c3	276.988	47.28	76.79	Non
Penner sib	h12c4	150.983	48.523	78.842	Non
Penner sib	h12c4	219.441	48.793	79.255	Non
Penner sib	h12c4	273.205	48.793	79.255	Non
Penner sib	h12c4	358.733	45.281	73.545	Non
Penner sib	h12c4	358.115	45.281	73.545	Non
Penner sib	h13c1	141.969	55.655	90.414	Non
Penner sib	h13c1	179.119	55.655	90.414	Non
Penner sib	h13c1	145.68	55.655	90.414	Non
Penner sib	h13c1	134.737	55.979	90.952	Non
Penner sib	h13c1	191.831	55.979	90.952	Non
Penner sib	h13c1	283.165	56.52	91.811	Non
Penner sib	h13c1	280.767	56.52	91.811	Non
Penner sib	h13c1	248.29	55.277	89.806	Non
Penner sib	h13c1	243.306	55.277	89.806	Non
Penner sib	h13c2	97.161	47.874	77.767	Non
Penner sib	h13c2	205.445	47.982	77.941	Non
Penner sib	h13c2	167.416	47.982	77.941	Non
Penner sib	h13c2	151.87	47.982	77.941	Non
Penner sib	h13c2	177.332	47.766	77.574	Non
Penner sib	h13c2	251.639	47.766	77.574	Non
Penner sib	h13c2	366.874	43.822	71.172	Non
Penner sib	h13c2	328.735	43.822	71.172	Non
Penner sib	h13c3	139.681	41.714	67.745	Non
Penner sib	h13c3	141.774	41.714	67.745	Non
Penner sib	h13c3	115.405	41.714	67.745	Non
Penner sib	h13c3	101.588	41.714	67.745	Non
Penner sib	h13c3	124.412	41.714	67.745	Non
Penner sib	h13c3	204.633	43.66	70.906	Non
Penner sib	h13c3	219.679	43.66	70.906	Non
Penner sib	h13c3	239.148	43.66	70.906	Non
Penner sib	h13c3	225.868	43.66	70.906	Non
Penner sib	h13c3	220.019	34.096	55.356	Non
Penner sib	h13c3	240.087	34.096	55.356	Non
Penner sib	h13c4	119.918	52.899	85.943	Non
Penner sib	h13c4	137.502	52.899	85.943	Non
Penner sib	h13c4	126.037	53.548	86.99	Non
Penner sib	h13c4	127.258	53.548	86.99	Non
Penner sib	h13c4	141.332	53.548	86.99	Non
Penner sib	h13c4	169.141	53.548	86.99	Non
Penner sib	h13c4	288.972	55.385	89.972	Non
Penner sib	h13c4	302.412	55.385	89.972	Non
Penner sib	h13c4	303.97	55.385	89.972	Non
Penner sib	h13c4	272.09	55.385	89.972	Non
Penner sib	h13c4	257.243	51.062	82.958	Non
Penner sib	h13c4	244.648	51.062	82.958	Non
Penner sib	h14c1	149.17	56.412	91.64	Non
Penner sib	h14c1	303.089	56.412	91.64	Non
Penner sib	h14c1	279.267	56.412	91.64	Non
Penner sib	h14c1	318.88	54.25	88.124	Non
Penner sib	h14c1	361.357	54.25	88.124	Non
Penner sib	h14c1	485.708	53.98	87.703	Non
Penner sib	h14c2	140.159	57.6	93.582	Non
Penner sib	h14c2	274.998	58.087	94.358	Non
Penner sib	h14c2	251.314	58.087	94.358	Non
Penner sib	h14c2	237.949	58.087	94.358	Non
Penner sib	h14c2	272.154	57.817	93.928	Non
Penner sib	h14c2	353.342	57.817	93.928	Non
Penner sib	h14c3	145.286	63.22	102.716	Non
Penner sib	h14c3	208.862	63.22	102.716	Non
Penner sib	h14c3	156.638	63.22	102.716	Non
Penner sib	h14c3	139.699	63.22	102.716	Non
Penner sib	h14c3	234.423	62.734	101.922	Non
Penner sib	h14c3	330.044	60.626	98.504	Non
Penner sib	h14c4	164.611	58.789	95.511	Non
Penner sib	h14c4	206.783	58.789	95.511	Non
Penner sib	h14c4	200.957	58.789	95.511	Non
Penner sib	h14c4	226.149	58.411	94.894	Non
Penner sib	h14c4	240.716	58.411	94.894	Non
Penner sib	h15c1	149.59	34.312	55.693	Non
Penner sib	h15c1	206.442	34.42	55.874	Non
Penner sib	h15c1	215.144	34.42	55.874	Non
Penner sib	h15c1	225.488	34.96	56.745	Non
Penner sib	h15c1	343.973	34.366	55.799	Non
Penner sib	h15c1	385.264	33.933	55.093	Non
Penner sib	h15c1	409.869	33.339	54.129	Non
Penner sib	h15c2	170.136	47.01	76.345	Non
Penner sib	h15c2	189.08	47.01	76.345	Non
Penner sib	h15c2	170.033	47.064	76.446	Non
Penner sib	h15c2	168.636	47.064	76.446	Non
Penner sib	h15c2	290.622	45.983	74.691	Non
Penner sib	h15c2	378.897	45.983	74.691	Non
Penner sib	h15c2	363.5	43.335	70.396	Non
Penner sib	h15c2	320.842	43.335	70.396	Non
Penner sib	h15c3	74.995	46.794	76.019	Non
Penner sib	h15c3	137.552	46.794	76.019	Non
Penner sib	h15c3	191.225	46.361	75.3	Non
Penner sib	h15c3	160.029	46.361	75.3	Non
Penner sib	h15c3	228.423	47.658	77.409	Non
Penner sib	h15c3	282.271	47.658	77.409	Non
Penner sib	h15c3	310.66	48.415	78.64	Non
Penner sib	h15c3	326.735	48.415	78.64	Non
Penner sib	h15c4	60.937	46.794	76.007	Non
Penner sib	h15c4	116.343	46.794	76.007	Non
Penner sib	h15c4	151.312	46.794	76.007	Non
Penner sib	h15c4	174.361	46.794	76.007	Non
Penner sib	h15c4	302.605	44.848	72.832	Non
Penner sib	h15c4	315.948	44.848	72.832	Non
Penner sib	h15c5	89.883	42.687	69.32	Non
Penner sib	h15c5	159.913	42.687	69.32	Non
Penner sib	h15c5	191.584	42.687	69.32	Non
Penner sib	h15c5	189.854	42.687	69.32	Non
Penner sib	h15c5	245.561	42.687	69.32	Non
Penner sib	h15c5	380.186	41.552	67.477	Non
Penner sib	h15c5	411.972	41.552	67.477	Non
Penner sib	h15c5	375.065	40.364	65.55	Non
Penner sib	h16c1	52.627	44.146	71.7	Non
Penner sib	h16c1	121.744	44.47	72.228	Non
Penner sib	h16c1	149.723	44.038	71.53	Non
Penner sib	h16c1	169.806	44.038	71.53	Non
Penner sib	h16c1	161.383	44.038	71.53	Non
Penner sib	h16c1	187.732	42.147	68.441	Non
Penner sib	h16c1	191.562	42.147	68.441	Non
Penner sib	h16c1	237.435	41.985	68.18	Non
Penner sib	h16c1	320.245	40.201	65.291	Non
Penner sib	h16c2	74.938	44.254	71.871	Non
Penner sib	h16c2	122.639	45.875	74.506	Non
Penner sib	h16c2	131.574	45.119	73.295	Non
Penner sib	h16c2	124.327	45.119	73.295	Non
Penner sib	h16c2	109.806	45.119	73.295	Non
Penner sib	h16c2	131.487	45.983	74.685	Non
Penner sib	h16c2	175.757	45.983	74.685	Non
Penner sib	h16c2	259.362	42.849	69.594	Non
Penner sib	h16c2	265.02	41.174	66.865	Non
Penner sib	h16c3	126.834	50.522	82.063	Non
Penner sib	h16c3	136.637	50.522	82.063	Non
Penner sib	h16c3	123.27	50.522	82.063	Non
Penner sib	h16c3	108.223	50.522	82.063	Non
Penner sib	h16c3	101.081	49.117	79.788	Non
Penner sib	h16c3	154.447	49.117	79.788	Non
Penner sib	h16c3	253.809	48.09	78.102	Non
Penner sib	h16c3	248.166	48.09	78.102	Non
Penner sib	h16c4	119.2	45.929	74.591	Non
Penner sib	h16c4	164.985	45.929	74.591	Non
Penner sib	h16c4	154.057	45.929	74.591	Non
Penner sib	h16c4	148.276	45.767	74.331	Non
Penner sib	h16c4	165.531	45.767	74.331	Non
Penner sib	h16c4	234.661	45.767	74.331	Non
Penner sib	h16c5	70.875	52.791	85.761	Non
Penner sib	h16c5	167.855	53.548	86.996	Non
Penner sib	h16c5	180.399	53.278	86.547	Non
Penner sib	h16c5	189.631	53.278	86.547	Non
Penner sib	h16c5	159.307	53.278	86.547	Non
Penner sib	h16c5	185.056	53.278	86.547	Non
Penner sib	h16c5	317.102	51.441	83.554	Non
Penner sib	h16c5	315.202	51.441	83.554	Non
Penner sib	h17c1	101.708	44.362	72.047	Non
Penner sib	h17c1	113.932	44.362	72.047	Non
Penner sib	h17c1	157.306	44.362	72.047	Non
Penner sib	h17c1	168.209	44.362	72.047	Non
Penner sib	h17c1	167.401	44.092	71.608	Non
Penner sib	h17c1	174.877	43.93	71.335	Non
Penner sib	h17c1	186.961	43.93	71.335	Non
Penner sib	h17c1	270.52	43.876	71.256	Non
Penner sib	h17c1	420.37	44.038	71.525	Non
Penner sib	h17c2	70.156	40.147	65.2	Non
Penner sib	h17c2	84.971	40.147	65.2	Non
Penner sib	h17c2	143.522	41.12	66.786	Non
Penner sib	h17c2	194.661	41.12	66.786	Non
Penner sib	h17c2	188.845	41.12	66.786	Non
Penner sib	h17c2	185.036	41.12	66.786	Non
Penner sib	h17c2	192.863	41.12	66.786	Non
Penner sib	h17c2	215.865	41.12	66.786	Non
Penner sib	h17c2	413.794	40.364	65.546	Non
Penner sib	h17c3	58.349	42.849	69.58	Non
Penner sib	h17c3	78.05	42.849	69.58	Non
Penner sib	h17c3	145.452	42.579	69.151	Non
Penner sib	h17c3	212.176	42.579	69.151	Non
Penner sib	h17c3	223.774	42.579	69.151	Non
Penner sib	h17c3	227.251	42.579	69.151	Non
Penner sib	h17c3	276.783	42.795	69.496	Non
Penner sib	h17c3	334.785	42.795	69.496	Non
Penner sib	h17c3	415.481	42.849	69.59	Non
Penner sib	h17c4	86.808	41.768	67.829	Non
Penner sib	h17c4	165.548	43.173	70.129	Non
Penner sib	h17c4	213.497	43.173	70.129	Non
Penner sib	h17c4	206.711	43.173	70.129	Non
Penner sib	h17c4	220.352	43.552	70.725	Non
Penner sib	h17c4	263.193	43.552	70.725	Non
Penner sib	h17c4	337.715	43.552	70.725	Non
Penner sib	h17c4	547.796	39.067	63.442	Non
Penner sib	h18c1	80.458	40.147	65.188	Non
Penner sib	h18c1	137.881	40.147	65.188	Non
Penner sib	h18c1	193.198	40.958	66.507	Non
Penner sib	h18c1	229.916	40.742	66.167	Non
Penner sib	h18c1	422.884	40.418	65.621	Non
Penner sib	h18c1	439.603	36.959	59.996	Non
Penner sib	h18c2	120.936	46.632	75.748	Non
Penner sib	h18c2	183.684	48.036	78.034	Non
Penner sib	h18c2	215.095	48.036	78.034	Non
Penner sib	h18c2	266.422	47.172	76.615	Non
Penner sib	h18c2	438.144	46.902	76.179	Non
Penner sib	h18c3	97.863	48.523	78.807	Non
Penner sib	h18c3	211.99	48.685	79.078	Non
Penner sib	h18c3	220.196	48.847	79.346	Non
Penner sib	h18c3	284.007	48.199	78.295	Non
Penner sib	h18c3	348.719	48.199	78.295	Non
Penner sib	h18c4	104.296	48.253	78.372	Non
Penner sib	h18c4	172.004	48.253	78.372	Non
Penner sib	h18c4	176.387	48.036	78.017	Non
Penner sib	h18c4	306.621	48.09	78.115	Non
Penner sib	h18c4	462.643	46.253	75.116	Non
Penner sib	h19c1	133.868	54.358	88.312	Non
Penner sib	h19c1	160.138	54.358	88.312	Non
Penner sib	h19c1	176.941	54.358	88.312	Non
Penner sib	h19c1	188.773	54.358	88.312	Non
Penner sib	h19c1	216.837	55.817	90.692	Non
Penner sib	h19c1	226.404	55.817	90.692	Non
Penner sib	h19c1	226.343	55.817	90.692	Non
Penner sib	h19c1	230.967	55.817	90.692	Non
Penner sib	h19c1	236.723	55.817	90.692	Non
Penner sib	h19c1	243.223	55.817	90.692	Non
Penner sib	h19c1	247.048	55.817	90.692	Non
Penner sib	h19c1	248.411	55.817	90.692	Non
Penner sib	h19c2	117.031	49.009	79.601	Non
Penner sib	h19c2	128.552	49.009	79.601	Non
Penner sib	h19c2	139.421	49.009	79.601	Non
Penner sib	h19c2	152.137	49.009	79.601	Non
Penner sib	h19c2	158.996	49.009	79.601	Non
Penner sib	h19c2	165.823	49.009	79.601	Non
Penner sib	h19c2	170.718	49.009	79.601	Non
Penner sib	h19c2	179.033	49.009	79.601	Non
Penner sib	h19c2	191.353	49.009	79.601	Non
Penner sib	h19c2	206.138	49.009	79.601	Non
Penner sib	h19c2	213.853	49.009	79.601	Non
Penner sib	h19c2	216.681	49.009	79.601	Non
Penner sib	h19c3	123.642	47.766	77.572	Non
Penner sib	h19c3	137.907	47.766	77.572	Non
Penner sib	h19c3	155.516	47.766	77.572	Non
Penner sib	h19c3	169.996	47.766	77.572	Non
Penner sib	h19c3	179.478	47.766	77.572	Non
Penner sib	h19c3	186.629	47.766	77.572	Non
Penner sib	h19c3	191.23	47.766	77.572	Non
Penner sib	h19c3	193.478	47.766	77.572	Non
Penner sib	h19c3	198.572	47.766	77.572	Non
Penner sib	h19c4	129.648	48.361	78.551	Non
Penner sib	h19c4	142.36	48.361	78.551	Non
Penner sib	h19c4	154.864	48.361	78.551	Non
Penner sib	h19c4	163.155	48.361	78.551	Non
Penner sib	h19c4	177.094	48.739	79.168	Non
Penner sib	h19c4	181.702	48.739	79.168	Non
Penner sib	h19c4	187.992	48.739	79.168	Non
Penner sib	h19c4	191.907	48.739	79.168	Non
Penner sib	h19c4	198.137	48.739	79.168	Non
Penner sib	h19c4	202.519	48.739	79.168	Non
Penner sib	h19c5	134.176	54.25	88.123	Non
Penner sib	h19c5	154.459	54.25	88.123	Non
Penner sib	h19c5	173.415	54.25	88.123	Non
Penner sib	h19c5	193.898	54.25	88.123	Non
Penner sib	h19c5	212.776	54.25	88.123	Non
Penner sib	h19c5	217.775	54.25	88.123	Non
Penner sib	h19c5	222.297	54.25	88.123	Non
Penner sib	h19c5	227.735	54.845	89.087	Non
Penner sib	h19c5	236.116	54.845	89.087	Non
Penner sib	h19c5	238.839	54.845	89.087	Non
Penner sib	h19c5	239.393	54.845	89.087	Non
Penner sib	h19c5	236.443	54.845	89.087	Non
Penner sib	h19c5	228.586	54.845	89.087	Non
Penner sib	h1c1	194.269	57.22	87.801	Non
Penner sib	h1c1	260.717	57.22	87.801	Non
Penner sib	h1c1	348.499	57.22	87.801	Non
Penner sib	h1c1	433.616	57.099	87.628	Non
Penner sib	h1c1	508.389	57.099	87.628	Non
Penner sib	h1c1	573.879	57.099	87.616	Non
Penner sib	h1c1	629.307	57.099	87.616	Non
Penner sib	h1c1	631.864	57.099	87.616	Non
Penner sib	h1c1	584.016	57.099	87.616	Non
Penner sib	h1c2	183.361	44.202	67.8	Non
Penner sib	h1c2	248.783	44.202	67.8	Non
Penner sib	h1c2	308.904	44.202	67.8	Non
Penner sib	h1c2	363	44.202	67.8	Non
Penner sib	h1c2	424.679	44.202	67.8	Non
Penner sib	h1c2	569.627	43.839	67.243	Non
Penner sib	h1c2	579.316	43.839	67.243	Non
Penner sib	h1c2	675.767	43.839	67.243	Non
Penner sib	h1c3	193.065	51.105	78.421	Non
Penner sib	h1c3	252.98	51.105	78.421	Non
Penner sib	h1c3	304.488	51.105	78.421	Non
Penner sib	h1c3	352.141	51.105	78.421	Non
Penner sib	h1c3	516.832	51.771	79.427	Non
Penner sib	h1c3	606.764	51.771	79.427	Non
Penner sib	h1c3	761.115	50.378	77.291	Non
Penner sib	h1c3	914.679	53.769	82.502	Non
Penner sib	h1c3	1137.657	53.769	82.502	Non
Penner sib	h1c4	243.697	45.534	69.848	Non
Penner sib	h1c4	330.546	45.534	69.848	Non
Penner sib	h1c4	402.027	45.534	69.848	Non
Penner sib	h1c4	470.5	44.808	68.733	Non
Penner sib	h1c4	538.139	44.808	68.733	Non
Penner sib	h1c4	601.299	44.808	68.733	Non
Penner sib	h1c4	814.174	43.354	66.501	Non
Penner sib	h1c4	783.322	43.354	66.501	Non
Penner sib	h1c5	250.594	50.075	76.827	Non
Penner sib	h1c5	328.458	50.075	76.827	Non
Penner sib	h1c5	440.501	50.075	76.827	Non
Penner sib	h1c5	533.359	50.075	76.827	Non
Penner sib	h1c5	631.581	50.499	77.474	Non
Penner sib	h1c5	674.818	50.499	77.474	Non
Penner sib	h1c5	687.326	50.499	77.474	Non
Penner sib	h1c5	663.224	50.499	77.474	Non
Penner sib	h20c1	112.611	46.956	97.016	Non
Penner sib	h20c1	132.199	46.956	97.016	Non
Penner sib	h20c1	151.875	46.956	97.016	Non
Penner sib	h20c1	169.66	46.956	90.418	Non
Penner sib	h20c1	181.539	46.956	95.8	Non
Penner sib	h20c1	187.179	46.956	95.8	Non
Penner sib	h20c1	191.208	46.956	95.8	Non
Penner sib	h20c1	192.701	46.956	84.918	Non
Penner sib	h20c1	194.275	46.956	84.918	Non
Penner sib	h20c1	191.592	46.956	82.692	Non
Penner sib	h20c2	105.598	46.199	82.692	Non
Penner sib	h20c2	120.785	46.199	82.604	Non
Penner sib	h20c2	136.492	46.199	82.604	Non
Penner sib	h20c2	150.68	46.199	90.961	Non
Penner sib	h20c2	159.643	46.199	90.961	Non
Penner sib	h20c2	165.548	46.199	90.961	Non
Penner sib	h20c2	170.19	46.199	89.487	Non
Penner sib	h20c2	173.083	46.199	81.47	Non
Penner sib	h20c2	187.437	45.497	81.47	Non
Penner sib	h20c2	178.472	45.497	81.47	Non
Penner sib	h20c2	169.149	45.497	81.47	Non
Penner sib	h20c3	119.757	59.762	82.789	Non
Penner sib	h20c3	139.021	59.762	82.789	Non
Penner sib	h20c3	154.124	59.762	82.322	Non
Penner sib	h20c3	162.13	59.762	82.322	Non
Penner sib	h20c3	166.164	59.762	82.322	Non
Penner sib	h20c3	170.829	59.762	82.322	Non
Penner sib	h20c3	176.542	59.762	81.776	Non
Penner sib	h20c3	183.977	59.762	96.748	Non
Penner sib	h20c3	192.202	59.762	96.748	Non
Penner sib	h20c3	193.52	59.762	96.748	Non
Penner sib	h20c4	129.844	56.033	96.279	Non
Penner sib	h20c4	148.42	56.033	96.279	Non
Penner sib	h20c4	159.051	56.033	96.279	Non
Penner sib	h20c4	165.306	56.033	78.88	Non
Penner sib	h20c4	169.47	56.033	78.88	Non
Penner sib	h20c4	179.215	55.817	78.88	Non
Penner sib	h20c4	183.278	55.817	79.702	Non
Penner sib	h20c4	188.344	55.817	79.702	Non
Penner sib	h20c4	190.879	55.817	79.702	Non
Penner sib	h21c1	107.887	55.979	79.702	Non
Penner sib	h21c1	116.806	55.979	84.819	Non
Penner sib	h21c1	125.146	55.979	84.819	Non
Penner sib	h21c1	161.319	51.657	84.819	Non
Penner sib	h21c1	167.226	51.657	85.106	Non
Penner sib	h21c1	174.464	51.657	84.997	Non
Penner sib	h21c1	183.649	51.657	82.316	Non
Penner sib	h21c1	203.935	51.657	82.316	Non
Penner sib	h21c1	218.059	51.657	82.316	Non
Penner sib	h21c2	122.873	44.308	82.784	Non
Penner sib	h21c2	143.023	44.308	83.621	Non
Penner sib	h21c2	164.427	44.308	83.621	Non
Penner sib	h21c2	176	44.308	83.621	Non
Penner sib	h21c2	201.23	44.632	83.621	Non
Penner sib	h21c2	214.247	44.632	75.341	Non
Penner sib	h21c2	230.26	44.632	75.341	Non
Penner sib	h21c2	246.705	44.632	79.258	Non
Penner sib	h21c2	254.666	44.632	79.258	Non
Penner sib	h21c2	253.896	44.632	79.258	Non
Penner sib	h21c3	123.224	55.655	79.258	Non
Penner sib	h21c3	147.25	55.655	79.258	Non
Penner sib	h21c3	165.562	55.655	79.258	Non
Penner sib	h21c3	176.367	55.655	70.691	Non
Penner sib	h21c3	184.351	55.655	70.691	Non
Penner sib	h21c3	191.035	55.655	70.691	Non
Penner sib	h21c3	201.602	55.655	70.691	Non
Penner sib	h21c3	209.593	55.655	70.691	Non
Penner sib	h21c3	214.309	55.655	70.691	Non
Penner sib	h21c3	217.185	55.655	70.311	Non
Penner sib	h21c4	131.567	43.822	70.311	Non
Penner sib	h21c4	154.325	43.822	74.585	Non
Penner sib	h21c4	172.758	43.822	74.585	Non
Penner sib	h21c4	189.199	43.822	74.585	Non
Penner sib	h21c4	202.293	43.822	74.585	Non
Penner sib	h21c4	218.351	43.822	74.585	Non
Penner sib	h21c4	237.139	43.822	74.585	Non
Penner sib	h21c4	246.546	43.822	74.585	Non
Penner sib	h21c4	246.317	43.822	87.51	Non
Penner sib	h22c1	132.602	55.925	87.51	Non
Penner sib	h22c1	146.862	55.925	87.51	Non
Penner sib	h22c1	158.473	55.925	87.51	Non
Penner sib	h22c1	176.969	55.925	87.51	Non
Penner sib	h22c1	196.047	55.925	87.91	Non
Penner sib	h22c1	204.742	55.925	87.91	Non
Penner sib	h22c1	204.911	55.925	87.91	Non
Penner sib	h22c2	113.396	51.224	87.91	Non
Penner sib	h22c2	125.033	51.224	85.756	Non
Penner sib	h22c2	134.736	51.224	85.756	Non
Penner sib	h22c2	147.105	51.224	85.756	Non
Penner sib	h22c2	185.749	50.522	85.756	Non
Penner sib	h22c2	198.696	50.522	85.569	Non
Penner sib	h22c2	204.061	50.522	85.012	Non
Penner sib	h22c2	204.171	50.522	78.605	Non
Penner sib	h22c2	198.615	50.522	78.605	Non
Penner sib	h22c2	187.833	50.522	78.605	Non
Penner sib	h22c3	102.951	50.684	78.605	Non
Penner sib	h22c3	112.231	50.684	77.673	Non
Penner sib	h22c3	120.251	50.684	77.673	Non
Penner sib	h22c3	130.124	50.684	77.673	Non
Penner sib	h22c3	140.81	50.684	88.357	Non
Penner sib	h22c3	150.512	50.684	88.357	Non
Penner sib	h22c3	156.79	50.684	88.357	Non
Penner sib	h22c3	164.193	50.684	88.18	Non
Penner sib	h22c3	174.133	50.684	80.91	Non
Penner sib	h22c3	181.652	50.684	80.91	Non
Penner sib	h22c3	181.846	50.684	80.91	Non
Penner sib	h23c1	160.393	45.497	83.432	Non
Penner sib	h23c1	180.43	45.497	83.432	Non
Penner sib	h23c1	184.387	45.497	83.432	Non
Penner sib	h23c1	193.035	45.497	83.432	Non
Penner sib	h23c1	204.602	45.497	82.402	Non
Penner sib	h23c1	202.659	45.497	82.402	Non
Penner sib	h23c2	147.833	56.844	94.694	Non
Penner sib	h23c2	178.99	56.844	94.694	Non
Penner sib	h23c2	202.718	56.844	94.983	Non
Penner sib	h23c2	220.995	56.844	94.983	Non
Penner sib	h23c2	219.214	56.844	94.983	Non
Penner sib	h23c3	150.945	50.036	98.684	Non
Penner sib	h23c3	172.764	50.036	98.684	Non
Penner sib	h23c3	185.892	50.036	98.684	Non
Penner sib	h23c3	187.616	50.036	98.684	Non
Penner sib	h23c3	181.352	49.874	98.598	Non
Penner sib	h23c3	171.472	49.874	98.598	Non
Penner sib	h23c4	135.846	45.065	98.792	Non
Penner sib	h23c4	150.784	45.065	98.792	Non
Penner sib	h23c4	160.716	45.065	97.291	Non
Penner sib	h23c4	168.8	45.065	97.291	Non
Penner sib	h23c4	175.486	45.065	97.291	Non
Penner sib	h23c4	175.951	45.065	94.955	Non
Penner sib	h23c4	286.385	42.363	94.955	Non
Penner sib	h23c4	272.058	42.363	75.068	Non
Penner sib	h23c4	236.118	42.363	75.068	Non
Penner sib	h24c1	119.689	59.87	75.068	Non
Penner sib	h24c1	135.113	59.87	75.068	Non
Penner sib	h24c1	154.785	59.87	70.311	Non
Penner sib	h24c1	172.657	59.87	70.311	Non
Penner sib	h24c1	196.15	62.301	70.311	Non
Penner sib	h24c1	210.591	62.301	63.173	Non
Penner sib	h24c1	214.98	62.301	63.173	Non
Penner sib	h24c1	208.677	62.301	63.173	Non
Penner sib	h24c2	128.607	54.088	64.632	Non
Penner sib	h24c2	146.769	54.088	59.802	Non
Penner sib	h24c2	160.996	54.088	59.802	Non
Penner sib	h24c2	173.515	54.088	65.109	Non
Penner sib	h24c2	184.783	54.088	64.912	Non
Penner sib	h24c2	191.309	54.088	64.912	Non
Penner sib	h24c2	194.174	54.088	64.912	Non
Penner sib	h24c2	194.015	54.088	73.2	Non
Penner sib	h24c2	191.446	54.088	73.2	Non
Penner sib	h24c3	105.047	51.981	73.2	Non
Penner sib	h24c3	113.299	51.981	73.2	Non
Penner sib	h24c3	125.94	51.981	74.029	Non
Penner sib	h24c3	137.338	51.981	74.029	Non
Penner sib	h24c3	146.747	51.981	74.029	Non
Penner sib	h24c3	156.135	51.981	73.016	Non
Penner sib	h24c3	169.993	49.82	73.016	Non
Penner sib	h24c3	173.541	49.82	73.016	Non
Penner sib	h24c3	177.478	49.82	72.168	Non
Penner sib	h24c3	178.054	49.82	72.168	Non
Penner sib	h24c4	106.722	57.33	72.168	Non
Penner sib	h24c4	119.696	57.33	72.168	Non
Penner sib	h24c4	133.895	57.33	64.737	Non
Penner sib	h24c4	145.391	57.33	75.051	Non
Penner sib	h24c4	162.576	55.385	75.051	Non
Penner sib	h24c4	178.909	55.385	75.051	Non
Penner sib	h24c4	185.761	55.385	74.685	Non
Penner sib	h24c4	189.025	55.385	74.685	Non
Penner sib	h24c4	187.82	55.385	70.605	Non
Penner sib	h24c4	184.7	55.385	70.605	Non
Penner sib	h24c4	177.295	55.385	75.616	Non
Penner sib	h24c5	100.195	47.604	75.616	Non
Penner sib	h24c5	111.636	47.604	75.616	Non
Penner sib	h24c5	126.712	47.604	75.616	Non
Penner sib	h24c5	142.414	47.604	73.673	Non
Penner sib	h24c5	154.496	47.604	73.673	Non
Penner sib	h24c5	165.191	47.604	73.673	Non
Penner sib	h24c5	167.981	46.577	70.602	Non
Penner sib	h24c5	173.391	46.577	70.602	Non
Penner sib	h24c5	173.818	46.577	70.517	Non
Penner sib	h24c5	174.606	46.577	70.517	Non
Penner sib	h24c5	171.56	46.577	70.517	Non
Penner sib	h25c1	107.228	52.143	66.046	Non
Penner sib	h25c1	116.248	52.143	68.649	Non
Penner sib	h25c1	126.959	52.143	78.784	Non
Penner sib	h25c1	135.996	52.143	77.748	Non
Penner sib	h25c1	145.522	52.143	77.748	Non
Penner sib	h25c1	157.714	52.143	77.748	Non
Penner sib	h25c1	170.817	52.143	76.549	Non
Penner sib	h25c1	188.378	52.143	76.549	Non
Penner sib	h25c2	106.071	54.845	76.549	Non
Penner sib	h25c2	114.281	54.845	72.176	Non
Penner sib	h25c2	123.092	54.845	72.176	Non
Penner sib	h25c2	134.823	54.845	72.176	Non
Penner sib	h25c2	144.453	54.845	72.176	Non
Penner sib	h25c2	158.837	55.763	72.176	Non
Penner sib	h25c2	171.205	55.763	71.066	Non
Penner sib	h25c2	187.656	55.763	71.066	Non
Penner sib	h25c2	208.271	55.763	71.066	Non
Penner sib	h25c2	221.18	55.763	73.288	Non
Penner sib	h25c3	122.056	42.093	73.288	Non
Penner sib	h25c3	136.416	42.093	73.288	Non
Penner sib	h25c3	160.824	42.093	73.288	Non
Penner sib	h25c3	180.801	42.093	73.288	Non
Penner sib	h25c3	198.731	42.093	73.006	Non
Penner sib	h25c3	221.705	42.093	73.006	Non
Penner sib	h25c3	240.737	42.093	73.006	Non
Penner sib	h25c4	106.448	50.954	82.755	Non
Penner sib	h25c4	115.636	50.954	82.755	Non
Penner sib	h25c4	127.138	50.954	82.755	Non
Penner sib	h25c4	140.301	50.954	82.755	Non
Penner sib	h25c4	151.896	50.954	82.755	Non
Penner sib	h25c4	164.218	50.954	82.755	Non
Penner sib	h25c4	183.117	50.954	82.755	Non
Penner sib	h25c4	205.539	50.954	82.755	Non
Penner sib	h25c5	100.906	46.307	75.217	Non
Penner sib	h25c5	110.674	46.307	75.217	Non
Penner sib	h25c5	122.927	46.307	75.217	Non
Penner sib	h25c5	137.34	46.307	75.217	Non
Penner sib	h25c5	147.717	46.307	75.217	Non
Penner sib	h25c5	158.102	46.307	75.217	Non
Penner sib	h25c5	171.893	46.307	75.217	Non
Penner sib	h25c5	186.28	46.307	75.217	Non
Penner sib	h25c5	213.673	46.307	75.221	Non
Penner sib	h25c5	229.31	46.307	75.221	Non
Penner sib	h25c5	233.055	46.307	75.221	Non
Penner sib	h26c1	112.666	50.468	81.981	Non
Penner sib	h26c1	120.722	50.468	81.981	Non
Penner sib	h26c1	131.915	50.468	81.981	Non
Penner sib	h26c1	141.381	50.468	81.981	Non
Penner sib	h26c1	158.516	50.414	81.893	Non
Penner sib	h26c1	165.738	50.414	81.893	Non
Penner sib	h26c1	175.235	50.414	81.893	Non
Penner sib	h26c1	191.876	50.414	81.893	Non
Penner sib	h26c1	200.232	50.414	81.893	Non
Penner sib	h26c1	204.408	50.414	81.893	Non
Penner sib	h26c1	202.857	50.414	81.893	Non
Penner sib	h26c1	197.949	50.414	81.893	Non
Penner sib	h26c1	188.746	50.414	81.893	Non
Penner sib	h26c2	126.356	50.252	81.639	Non
Penner sib	h26c2	134.257	50.252	81.639	Non
Penner sib	h26c2	141.599	50.252	81.639	Non
Penner sib	h26c2	151.826	50.252	81.639	Non
Penner sib	h26c2	163.162	50.252	81.639	Non
Penner sib	h26c2	172.168	50.252	81.639	Non
Penner sib	h26c2	179.418	50.252	81.639	Non
Penner sib	h26c2	189.693	50.252	81.639	Non
Penner sib	h26c2	193.692	50.252	81.639	Non
Penner sib	h26c2	193.595	50.252	81.639	Non
Penner sib	h26c2	192.116	50.252	81.639	Non
Penner sib	h26c3	144.289	41.606	67.573	Non
Penner sib	h26c3	151.371	41.606	67.573	Non
Penner sib	h26c3	155.081	41.606	67.573	Non
Penner sib	h26c3	158.653	41.606	67.573	Non
Penner sib	h26c3	165.026	41.606	67.573	Non
Penner sib	h26c3	172.959	41.606	67.573	Non
Penner sib	h26c3	181.801	41.606	67.573	Non
Penner sib	h26c3	198.202	41.606	67.573	Non
Penner sib	h26c3	203.48	41.606	67.573	Non
Penner sib	h26c3	200.973	41.606	67.573	Non
Penner sib	h26c4	115.42	45.065	73.201	Non
Penner sib	h26c4	129.866	45.065	73.201	Non
Penner sib	h26c4	140.65	45.065	73.201	Non
Penner sib	h26c4	153.106	45.065	73.201	Non
Penner sib	h26c4	165.463	45.065	73.201	Non
Penner sib	h26c4	179.949	45.065	73.201	Non
Penner sib	h26c4	186.416	45.065	73.201	Non
Penner sib	h26c4	189.878	45.065	73.201	Non
Penner sib	h26c4	189.97	45.065	73.201	Non
Penner sib	h26c4	188.396	45.065	73.201	Non
Penner sib	h26c4	183.36	45.065	73.201	Non
Penner sib	h26c4	180.812	45.065	73.201	Non
Penner sib	h27c1	170.159	50.468	81.986	Non
Penner sib	h27c1	189.297	50.468	81.986	Non
Penner sib	h27c1	205.946	50.468	81.986	Non
Penner sib	h27c1	224.099	50.468	81.986	Non
Penner sib	h27c1	245.055	50.468	81.986	Non
Penner sib	h27c1	260.453	50.468	81.986	Non
Penner sib	h27c2	161.398	52.845	85.832	Non
Penner sib	h27c2	184.948	52.845	85.832	Non
Penner sib	h27c2	202.092	52.845	85.832	Non
Penner sib	h27c2	217.955	52.845	85.832	Non
Penner sib	h27c2	230.884	52.845	85.832	Non
Penner sib	h27c2	237.802	52.845	85.832	Non
Penner sib	h27c2	228.42	52.845	85.832	Non
Penner sib	h27c3	101.26	44.308	71.972	Non
Penner sib	h27c3	113.06	44.308	71.972	Non
Penner sib	h27c3	134.355	44.308	71.972	Non
Penner sib	h27c3	153.662	44.308	71.972	Non
Penner sib	h27c3	168.881	44.308	71.972	Non
Penner sib	h27c3	179.255	44.308	71.972	Non
Penner sib	h27c3	192.116	44.308	71.972	Non
Penner sib	h27c3	207.562	44.308	71.972	Non
Penner sib	h27c3	215.391	44.308	71.972	Non
Penner sib	h27c4	125.035	47.982	77.939	Non
Penner sib	h27c4	144.231	47.982	77.939	Non
Penner sib	h27c4	165.031	47.982	77.939	Non
Penner sib	h27c4	178.459	47.982	77.939	Non
Penner sib	h27c4	188.768	47.982	77.939	Non
Penner sib	h27c4	198.364	47.982	77.939	Non
Penner sib	h27c4	211.364	47.982	77.939	Non
Penner sib	h27c4	221.277	47.982	77.939	Non
Penner sib	h2c1	142.766	63.215	97.016	Non
Penner sib	h2c1	325.581	63.215	97.016	Non
Penner sib	h2c1	456.272	63.215	97.016	Non
Penner sib	h2c1	552.83	58.916	90.418	Non
Penner sib	h2c2	117.638	62.428	95.8	Non
Penner sib	h2c2	253.465	62.428	95.8	Non
Penner sib	h2c2	338.339	62.428	95.8	Non
Penner sib	h2c2	499.83	55.343	84.918	Non
Penner sib	h2c2	348.16	55.343	84.918	Non
Penner sib	h2c3	67.76	53.89	82.692	Non
Penner sib	h2c3	182.16	53.89	82.692	Non
Penner sib	h2c3	370.228	53.83	82.604	Non
Penner sib	h2c3	477.868	53.83	82.604	Non
Penner sib	h2c4	71.117	59.279	90.961	Non
Penner sib	h2c4	179.027	59.279	90.961	Non
Penner sib	h2c4	262.892	59.279	90.961	Non
Penner sib	h2c4	385.28	58.31	89.487	Non
Penner sib	h2c4	991.236	53.103	81.47	Non
Penner sib	h2c4	881.616	53.103	81.47	Non
Penner sib	h2c4	480.246	53.103	81.47	Non
Penner sib	h2c4	238.194	53.103	81.47	Non
Penner sib	h3c1	141.811	53.951	82.789	Non
Penner sib	h3c1	215.223	53.951	82.789	Non
Penner sib	h3c1	329.395	53.648	82.322	Non
Penner sib	h3c1	444.097	53.648	82.322	Non
Penner sib	h3c1	540.397	53.648	82.322	Non
Penner sib	h3c1	570.69	53.648	82.322	Non
Penner sib	h3c1	649.493	53.285	81.776	Non
Penner sib	h3c2	172.69	63.033	96.748	Non
Penner sib	h3c2	260.156	63.033	96.748	Non
Penner sib	h3c2	330.032	63.033	96.748	Non
Penner sib	h3c2	435.96	62.731	96.279	Non
Penner sib	h3c2	538.124	62.731	96.279	Non
Penner sib	h3c2	551.091	62.731	96.279	Non
Penner sib	h3c3	91.619	51.408	78.88	Non
Penner sib	h3c3	153.168	51.408	78.88	Non
Penner sib	h3c3	228.33	51.408	78.88	Non
Penner sib	h3c3	393.89	51.953	79.702	Non
Penner sib	h3c3	550.899	51.953	79.702	Non
Penner sib	h3c3	638.575	51.953	79.702	Non
Penner sib	h3c3	665.436	51.953	79.702	Non
Penner sib	h3c4	144.129	55.283	84.819	Non
Penner sib	h3c4	226.797	55.283	84.819	Non
Penner sib	h3c4	270.191	55.283	84.819	Non
Penner sib	h3c4	395.588	55.464	85.106	Non
Penner sib	h3c4	516.096	55.404	84.997	Non
Penner sib	h3c4	571.469	53.648	82.316	Non
Penner sib	h3c4	570.13	53.648	82.316	Non
Penner sib	h3c4	535.712	53.648	82.316	Non
Penner sib	h4c1	121.747	53.951	82.784	Non
Penner sib	h4c1	176.163	54.496	83.621	Non
Penner sib	h4c1	223.309	54.496	83.621	Non
Penner sib	h4c1	286.856	54.496	83.621	Non
Penner sib	h4c1	348.289	54.496	83.621	Non
Penner sib	h4c1	456.308	49.107	75.341	Non
Penner sib	h4c1	466.559	49.107	75.341	Non
Penner sib	h4c2	112.065	51.65	79.258	Non
Penner sib	h4c2	172.231	51.65	79.258	Non
Penner sib	h4c2	192.464	51.65	79.258	Non
Penner sib	h4c2	240.166	51.65	79.258	Non
Penner sib	h4c2	280.381	51.65	79.258	Non
Penner sib	h4c2	311.102	51.65	79.258	Non
Penner sib	h4c3	118.909	46.079	70.691	Non
Penner sib	h4c3	170.053	46.079	70.691	Non
Penner sib	h4c3	237.905	46.079	70.691	Non
Penner sib	h4c3	304.607	46.079	70.691	Non
Penner sib	h4c3	400.012	46.079	70.691	Non
Penner sib	h4c3	529.856	46.079	70.691	Non
Penner sib	h4c3	603.755	45.837	70.311	Non
Penner sib	h4c3	585.615	45.837	70.311	Non
Penner sib	h4c4	166.999	48.622	74.585	Non
Penner sib	h4c4	213.54	48.622	74.585	Non
Penner sib	h4c4	281.558	48.622	74.585	Non
Penner sib	h4c4	351.89	48.622	74.585	Non
Penner sib	h4c4	435.031	48.622	74.585	Non
Penner sib	h4c4	500.245	48.622	74.585	Non
Penner sib	h4c4	481.425	48.622	74.585	Non
Penner sib	h4c5	107.569	57.039	87.51	Non
Penner sib	h4c5	158.007	57.039	87.51	Non
Penner sib	h4c5	217.331	57.039	87.51	Non
Penner sib	h4c5	275.671	57.039	87.51	Non
Penner sib	h4c5	368.423	57.039	87.51	Non
Penner sib	h4c5	390.761	57.281	87.91	Non
Penner sib	h4c5	463.063	57.281	87.91	Non
Penner sib	h4c5	470.283	57.281	87.91	Non
Penner sib	h4c5	427.625	57.281	87.91	Non
Penner sib	h5c1	105.673	55.888	85.756	Non
Penner sib	h5c1	204.771	55.888	85.756	Non
Penner sib	h5c1	291.442	55.888	85.756	Non
Penner sib	h5c1	373.477	55.888	85.756	Non
Penner sib	h5c1	468.158	55.767	85.569	Non
Penner sib	h5c1	518.479	55.404	85.012	Non
Penner sib	h5c2	138.348	51.226	78.605	Non
Penner sib	h5c2	199.927	51.226	78.605	Non
Penner sib	h5c2	275.145	51.226	78.605	Non
Penner sib	h5c2	333.799	51.226	78.605	Non
Penner sib	h5c2	391.995	50.62	77.673	Non
Penner sib	h5c2	398.962	50.62	77.673	Non
Penner sib	h5c2	360.098	50.62	77.673	Non
Penner sib	h5c3	164.916	57.584	88.357	Non
Penner sib	h5c3	264.349	57.584	88.357	Non
Penner sib	h5c3	340.381	57.584	88.357	Non
Penner sib	h5c3	442.203	57.463	88.18	Non
Penner sib	h5c3	548.876	52.74	80.91	Non
Penner sib	h5c3	549.591	52.74	80.91	Non
Penner sib	h5c3	458.876	52.74	80.91	Non
Penner sib	h5c4	117.135	54.375	83.432	Non
Penner sib	h5c4	211.675	54.375	83.432	Non
Penner sib	h5c4	303.416	54.375	83.432	Non
Penner sib	h5c4	390.46	54.375	83.432	Non
Penner sib	h5c4	521.217	53.709	82.402	Non
Penner sib	h5c4	553.261	53.709	82.402	Non
Penner sib	h6c1	145.031	61.701	94.694	Non
Penner sib	h6c1	242.115	61.701	94.694	Non
Penner sib	h6c1	315.79	61.883	94.983	Non
Penner sib	h6c1	401.789	61.883	94.983	Non
Penner sib	h6c1	482.332	61.883	94.983	Non
Penner sib	h6c2	142.16	64.305	98.684	Non
Penner sib	h6c2	264.871	64.305	98.684	Non
Penner sib	h6c2	358.765	64.305	98.684	Non
Penner sib	h6c2	431.454	64.305	98.684	Non
Penner sib	h6c2	546.749	64.244	98.598	Non
Penner sib	h6c2	582.837	64.244	98.598	Non
Penner sib	h6c3	70.173	64.365	98.792	Non
Penner sib	h6c3	137.239	64.365	98.792	Non
Penner sib	h6c3	237.064	63.397	97.291	Non
Penner sib	h6c3	313.791	63.397	97.291	Non
Penner sib	h6c3	460.265	63.397	97.291	Non
Penner sib	h6c3	611.332	61.883	94.955	Non
Penner sib	h6c3	591.011	61.883	94.955	Non
Penner sib	h6c4	91.613	48.925	75.068	Non
Penner sib	h6c4	172.349	48.925	75.068	Non
Penner sib	h6c4	227.094	48.925	75.068	Non
Penner sib	h6c4	295.579	48.925	75.068	Non
Penner sib	h6c4	533.815	45.837	70.311	Non
Penner sib	h6c4	589.988	45.837	70.311	Non
Penner sib	h6c4	579.387	45.837	70.311	Non
Penner sib	h8c1	338.327	41.175	63.173	Non
Penner sib	h8c1	561.951	41.175	63.173	Non
Penner sib	h8c1	703.99	41.175	63.173	Non
Penner sib	h8c1	851.531	42.143	64.632	Non
Penner sib	h8c1	678.778	38.995	59.802	Non
Penner sib	h8c1	567.985	38.995	59.802	Non
Penner sib	h8c2	250.681	42.446	65.109	Non
Penner sib	h8c2	369.528	42.325	64.912	Non
Penner sib	h8c2	450.087	42.325	64.912	Non
Penner sib	h8c2	524.14	42.325	64.912	Non
Penner sib	h8c3	230.773	47.714	73.2	Non
Penner sib	h8c3	344.623	47.714	73.2	Non
Penner sib	h8c3	502.842	47.714	73.2	Non
Penner sib	h8c3	556.638	47.714	73.2	Non
Penner sib	h8c4	166.857	48.259	74.029	Non
Penner sib	h8c4	318.537	48.259	74.029	Non
Penner sib	h8c4	463.394	48.259	74.029	Non
Penner sib	h8c4	584.75	47.593	73.016	Non
Penner sib	h8c4	754.444	47.593	73.016	Non
Penner sib	h8c4	742.885	47.593	73.016	Non
Penner sib	h8c5	352.464	47.048	72.168	Non
Penner sib	h8c5	589.949	47.048	72.168	Non
Penner sib	h8c5	873.386	47.048	72.168	Non
Penner sib	h8c5	968.617	47.048	72.168	Non
Penner sib	h8c5	868.73	42.204	64.737	Non
Penner sib	h8c6	227.222	48.925	75.051	Non
Penner sib	h8c6	424.936	48.925	75.051	Non
Penner sib	h8c6	623.621	48.925	75.051	Non
Penner sib	h8c6	949.481	48.683	74.685	Non
Penner sib	h8c6	976.288	48.683	74.685	Non
Penner sib	h8c6	869.234	46.019	70.605	Non
Penner sib	h8c6	798.948	46.019	70.605	Non
Penner sib	h9c1	85.532	49.288	75.616	Non
Penner sib	h9c1	136.439	49.288	75.616	Non
Penner sib	h9c1	197.828	49.288	75.616	Non
Penner sib	h9c1	266.004	49.288	75.616	Non
Penner sib	h9c1	414.811	48.017	73.673	Non
Penner sib	h9c1	474.74	48.017	73.673	Non
Penner sib	h9c1	482.619	48.017	73.673	Non
Penner sib	h9c2	123.503	46.019	70.602	Non
Penner sib	h9c2	177.869	46.019	70.602	Non
Penner sib	h9c2	313.185	45.958	70.517	Non
Penner sib	h9c2	405.825	45.958	70.517	Non
Penner sib	h9c2	433.196	45.958	70.517	Non
Penner sib	h9c2	433.897	43.052	66.046	Non
Penner sib	h9c2	335.044	44.747	68.649	Non
Penner sib	h9c3	113.663	51.347	78.784	Non
Penner sib	h9c3	150.215	50.681	77.748	Non
Penner sib	h9c3	225.989	50.681	77.748	Non
Penner sib	h9c3	316.727	50.681	77.748	Non
Penner sib	h9c3	416.677	49.894	76.549	Non
Penner sib	h9c3	490.48	49.894	76.549	Non
Penner sib	h9c3	514.328	49.894	76.549	Non
Penner sib	h9c4	132.369	47.048	72.176	Non
Penner sib	h9c4	199.504	47.048	72.176	Non
Penner sib	h9c4	273.377	47.048	72.176	Non
Penner sib	h9c4	378.145	47.048	72.176	Non
Penner sib	h9c4	449.174	47.048	72.176	Non
Penner sib	h9c4	515.747	46.321	71.066	Non
Penner sib	h9c4	532.796	46.321	71.066	Non
Penner sib	h9c4	501.718	46.321	71.066	Non
Penner sib	h9c5	139.497	47.775	73.288	Non
Penner sib	h9c5	209.905	47.775	73.288	Non
Penner sib	h9c5	282.748	47.775	73.288	Non
Penner sib	h9c5	345.532	47.775	73.288	Non
Penner sib	h9c5	483.146	47.775	73.288	Non
Penner sib	h9c5	674.761	47.593	73.006	Non
Penner sib	h9c5	683.909	47.593	73.006	Non
Penner sib	h9c5	636.317	47.593	73.006	Non
Penner mut	h10c1	64.796	47.388	76.97	Non
Penner mut	h10c1	93.1	47.388	76.97	Non
Penner mut	h10c1	88.255	47.388	76.97	Non
Penner mut	h10c1	90.981	47.55	77.241	Non
Penner mut	h10c1	88.097	48.199	78.287	Non
Penner mut	h10c1	99.12	48.199	78.287	Non
Penner mut	h10c1	154.638	47.064	76.459	Non
Penner mut	h10c1	170.791	47.064	76.459	Non
Penner mut	h10c1	172.6	47.064	76.459	Non
Penner mut	h10c2	103.542	44.038	71.53	Non
Penner mut	h10c2	100.499	44.038	71.53	Non
Penner mut	h10c2	98.599	44.038	71.53	Non
Penner mut	h10c2	91.578	44.416	72.141	Non
Penner mut	h10c2	79.966	44.416	72.141	Non
Penner mut	h10c2	115.59	41.498	67.391	Non
Penner mut	h10c2	140.443	41.606	67.583	Non
Penner mut	h10c2	143.283	41.606	67.583	Non
Penner mut	h10c2	141.922	41.606	67.583	Non
Penner mut	h10c2	142.528	42.579	69.156	Non
Penner mut	h10c2	213.225	43.281	70.289	Non
Penner mut	h10c2	208.74	43.281	70.289	Non
Penner mut	h10c3	67.517	43.498	70.659	Non
Penner mut	h10c3	96.125	43.498	70.659	Non
Penner mut	h10c3	106.006	43.498	70.659	Non
Penner mut	h10c3	102.482	43.498	70.659	Non
Penner mut	h10c3	102.785	43.498	70.659	Non
Penner mut	h10c3	113.488	43.498	70.659	Non
Penner mut	h10c3	129.962	43.498	70.659	Non
Penner mut	h10c3	207.446	43.552	70.741	Non
Penner mut	h10c3	202.236	43.552	70.741	Non
Penner mut	h10c4	106.658	49.333	80.124	Non
Penner mut	h10c4	103.31	49.333	80.124	Non
Penner mut	h10c4	92.925	49.333	80.124	Non
Penner mut	h10c4	83.728	49.333	80.124	Non
Penner mut	h10c4	102.671	48.631	78.993	Non
Penner mut	h10c4	147.264	49.171	79.865	Non
Penner mut	h10c4	165.489	49.171	79.865	Non
Penner mut	h10c4	202.13	46.577	75.645	Non
Penner mut	h10c4	141.559	44.308	71.969	Non
Penner mut	h10c5	84.784	53.602	87.087	Non
Penner mut	h10c5	84.879	53.602	87.087	Non
Penner mut	h10c5	79.474	53.602	87.087	Non
Penner mut	h10c5	74.252	53.602	87.087	Non
Penner mut	h10c5	76.041	53.602	87.087	Non
Penner mut	h10c5	144.532	53.116	86.273	Non
Penner mut	h10c5	179.66	46.577	75.652	Non
Penner mut	h10c5	173.921	46.577	75.652	Non
Penner mut	h11c1	54.743	49.549	80.469	Non
Penner mut	h11c1	88.084	49.549	80.469	Non
Penner mut	h11c1	89.933	51.441	83.556	Non
Penner mut	h11c1	86.806	51.441	83.556	Non
Penner mut	h11c1	105.154	51.657	83.914	Non
Penner mut	h11c1	132.03	51.657	83.914	Non
Penner mut	h11c2	64.063	52.143	84.703	Non
Penner mut	h11c2	109.557	52.143	84.703	Non
Penner mut	h11c2	120.236	52.143	84.703	Non
Penner mut	h11c2	126.355	52.143	84.703	Non
Penner mut	h11c2	150.958	52.143	84.703	Non
Penner mut	h11c2	190.396	49.549	80.48	Non
Penner mut	h11c3	32.907	54.088	87.849	Non
Penner mut	h11c3	54.365	54.088	87.849	Non
Penner mut	h11c3	61.926	54.791	89.021	Non
Penner mut	h11c3	66.996	54.791	89.021	Non
Penner mut	h11c3	87.191	54.791	89.021	Non
Penner mut	h11c3	116.287	54.791	89.021	Non
Penner mut	h11c4	43.896	55.061	89.442	Non
Penner mut	h11c4	74.839	55.061	89.442	Non
Penner mut	h11c4	83.85	55.061	89.442	Non
Penner mut	h11c4	86.799	55.061	89.442	Non
Penner mut	h11c4	104.07	55.061	89.442	Non
Penner mut	h11c4	136.06	55.061	89.442	Non
Penner mut	h11c4	177.669	47.064	76.448	Non
Penner mut	h12c1	99.183	53.494	86.89	Non
Penner mut	h12c1	114.282	53.494	86.89	Non
Penner mut	h12c1	129.609	53.062	86.178	Non
Penner mut	h12c1	155.464	53.062	86.178	Non
Penner mut	h12c1	269.219	51.387	83.457	Non
Penner mut	h12c1	230.325	48.469	78.714	Non
Penner mut	h12c1	211.342	48.469	78.714	Non
Penner mut	h12c2	112.494	46.956	76.266	Non
Penner mut	h12c2	111.385	46.956	76.266	Non
Penner mut	h12c2	117.393	46.956	76.266	Non
Penner mut	h12c2	137.227	46.956	76.266	Non
Penner mut	h12c2	237.887	48.415	78.627	Non
Penner mut	h12c2	229.159	43.011	69.859	Non
Penner mut	h12c2	216.934	43.011	69.859	Non
Penner mut	h12c2	195.332	43.011	69.859	Non
Penner mut	h12c3	95.231	46.415	75.396	Non
Penner mut	h12c3	131.198	46.199	75.04	Non
Penner mut	h12c3	158.053	46.199	75.04	Non
Penner mut	h12c3	191.398	46.253	75.117	Non
Penner mut	h12c3	190.163	46.253	75.117	Non
Penner mut	h12c3	188.627	46.253	75.117	Non
Penner mut	h12c3	193.706	46.469	75.481	Non
Penner mut	h12c3	192.508	46.469	75.481	Non
Penner mut	h12c4	97.97	51.224	83.218	Non
Penner mut	h12c4	118.404	52.467	85.233	Non
Penner mut	h12c4	159.802	52.467	85.233	Non
Penner mut	h12c4	166.482	52.467	85.233	Non
Penner mut	h12c5	94.46	40.147	65.206	Non
Penner mut	h12c5	116.949	40.147	65.206	Non
Penner mut	h12c5	102.997	40.147	65.198	Non
Penner mut	h12c5	218.79	42.579	69.155	Non
Penner mut	h12c5	250.108	42.579	69.155	Non
Penner mut	h12c5	216.722	36.905	59.921	Non
Penner mut	h12c5	209.364	36.905	59.921	Non
Penner mut	h12c5	198.564	36.905	59.921	Non
Penner mut	h13c1	111.346	51.224	83.205	Non
Penner mut	h13c1	130.101	51.224	83.205	Non
Penner mut	h13c1	130.084	51.711	84.008	Non
Penner mut	h13c1	217.413	50.954	82.78	Non
Penner mut	h13c1	396.403	48.793	79.264	Non
Penner mut	h13c1	353.895	46.523	75.561	Non
Penner mut	h13c2	106.425	50.468	81.987	Non
Penner mut	h13c2	131.112	50.468	81.987	Non
Penner mut	h13c2	111.591	50.468	81.987	Non
Penner mut	h13c2	275.195	50.792	82.511	Non
Penner mut	h13c3	124.475	42.903	69.663	Non
Penner mut	h13c3	148.42	42.903	69.663	Non
Penner mut	h13c3	235.698	40.472	65.718	Non
Penner mut	h13c3	224.272	37.824	61.411	Non
Penner mut	h13c4	83.368	42.903	92.446	Non
Penner mut	h13c4	126.952	42.903	92.269	Non
Penner mut	h13c4	185.684	40.472	92.416	Non
Penner mut	h13c4	220.811	37.824	90.324	Non
Penner mut	h13c5	112.803	46.686	75.829	Non
Penner mut	h13c5	132.037	46.686	75.829	Non
Penner mut	h13c5	213.826	44.956	73.023	Non
Penner mut	h13c5	227.015	44.956	73.023	Non
Penner mut	h14c1	93.892	44.47	72.213	Non
Penner mut	h14c1	149.546	45.875	74.502	Non
Penner mut	h14c1	188.194	45.875	74.502	Non
Penner mut	h14c1	240.158	45.875	74.502	Non
Penner mut	h14c1	318.816	45.875	74.502	Non
Penner mut	h14c1	406.884	45.875	74.502	Non
Penner mut	h14c1	504.492	45.875	74.502	Non
Penner mut	h14c2	95.683	47.712	77.499	Non
Penner mut	h14c2	161.151	47.712	77.499	Non
Penner mut	h14c2	158.09	47.712	77.499	Non
Penner mut	h14c2	215.107	47.712	77.499	Non
Penner mut	h14c2	282.023	47.712	77.499	Non
Penner mut	h14c2	332.299	47.712	77.499	Non
Penner mut	h14c3	94.852	43.335	70.388	Non
Penner mut	h14c3	144.317	43.335	70.388	Non
Penner mut	h14c3	169.691	43.335	70.388	Non
Penner mut	h14c3	240.173	43.335	70.388	Non
Penner mut	h14c3	350.399	43.335	70.388	Non
Penner mut	h14c4	112.635	42.903	69.68	Non
Penner mut	h14c4	168.694	42.903	69.68	Non
Penner mut	h14c4	192.434	42.903	69.68	Non
Penner mut	h14c4	260.556	42.903	69.68	Non
Penner mut	h14c4	363.944	43.011	69.85	Non
Penner mut	h15c1	123.107	40.418	65.637	Non
Penner mut	h15c1	197.164	40.418	65.637	Non
Penner mut	h15c1	252.826	41.228	66.956	Non
Penner mut	h15c1	250.024	41.228	66.956	Non
Penner mut	h15c1	295.967	41.39	67.221	Non
Penner mut	h15c1	313.656	41.39	67.221	Non
Penner mut	h15c1	326.799	41.39	67.221	Non
Penner mut	h15c1	451.651	39.499	64.147	Non
Penner mut	h15c1	432.694	39.499	64.147	Non
Penner mut	h15c1	403.981	39.499	64.147	Non
Penner mut	h15c1	358.801	35.284	57.288	Non
Penner mut	h15c1	362.354	31.502	51.14	Non
Penner mut	h15c2	99.095	41.714	67.748	Non
Penner mut	h15c2	186.874	41.714	67.748	Non
Penner mut	h15c2	336.329	41.714	67.748	Non
Penner mut	h15c2	498.05	41.336	67.131	Non
Penner mut	h15c2	477.321	41.336	67.131	Non
Penner mut	h15c2	451.126	41.336	67.131	Non
Penner mut	h15c2	472.656	36.203	58.765	Non
Penner mut	h15c2	460.332	36.203	58.765	Non
Penner mut	h15c2	321.114	32.204	52.28	Non
Penner mut	h15c3	227.825	42.363	68.793	Non
Penner mut	h15c3	253.977	42.363	68.793	Non
Penner mut	h15c3	475.59	42.471	68.969	Non
Penner mut	h15c3	527.504	42.471	68.969	Non
Penner mut	h15c3	399.25	37.23	60.451	Non
Penner mut	h15c3	388.331	37.23	60.451	Non
Penner mut	h15c3	367.83	37.23	60.451	Non
Penner mut	h15c4	178.838	47.28	76.793	Non
Penner mut	h15c4	226.116	46.794	75.995	Non
Penner mut	h15c4	391.998	47.01	76.367	Non
Penner mut	h15c4	390.918	47.01	76.367	Non
Penner mut	h15c4	353.149	47.01	76.367	Non
Penner mut	h15c4	314.707	47.01	76.367	Non
Penner mut	h15c5	143.966	42.525	69.053	Non
Penner mut	h15c5	218.37	42.525	69.053	Non
Penner mut	h15c5	297.5	42.525	69.053	Non
Penner mut	h15c5	415.298	42.525	69.053	Non
Penner mut	h15c5	464.518	42.417	68.865	Non
Penner mut	h15c5	463.497	42.417	68.865	Non
Penner mut	h15c5	449.774	42.417	68.865	Non
Penner mut	h15c5	411.239	42.417	68.865	Non
Penner mut	h16c1	30.007	46.794	76.01	Non
Penner mut	h16c1	106.078	49.874	81.011	Non
Penner mut	h16c1	145.099	49.982	81.197	Non
Penner mut	h16c1	163.478	50.414	81.885	Non
Penner mut	h16c1	154.27	50.414	81.885	Non
Penner mut	h16c1	145.971	50.414	81.885	Non
Penner mut	h16c1	142.209	50.414	81.885	Non
Penner mut	h16c1	154.964	50.414	81.885	Non
Penner mut	h16c1	172.086	50.414	81.885	Non
Penner mut	h16c1	159.894	50.414	81.885	Non
Penner mut	h16c1	165.489	50.414	81.885	Non
Penner mut	h16c1	199.959	50.09	81.364	Non
Penner mut	h16c1	223.257	50.09	81.364	Non
Penner mut	h16c1	273.855	50.144	81.452	Non
Penner mut	h16c1	272.647	50.144	81.452	Non
Penner mut	h16c1	259.791	50.144	81.452	Non
Penner mut	h16c2	79.481	57.114	92.785	Non
Penner mut	h16c2	157.601	57.114	92.785	Non
Penner mut	h16c2	206.047	56.52	91.822	Non
Penner mut	h16c2	282.927	56.52	91.822	Non
Penner mut	h16c2	277.646	56.52	91.822	Non
Penner mut	h16c2	270.119	56.52	91.822	Non
Penner mut	h16c2	273.141	56.52	91.822	Non
Penner mut	h16c2	283.403	56.52	91.822	Non
Penner mut	h16c2	281.036	56.52	91.822	Non
Penner mut	h16c2	266.475	56.52	91.822	Non
Penner mut	h16c2	249.06	56.52	91.822	Non
Penner mut	h16c2	276.744	52.575	85.408	Non
Penner mut	h16c2	286.493	52.575	85.408	Non
Penner mut	h16c3	74.494	55.763	90.584	Non
Penner mut	h16c3	127.752	55.763	90.584	Non
Penner mut	h16c3	204.936	56.952	92.496	Non
Penner mut	h16c3	256.056	56.952	92.496	Non
Penner mut	h16c3	251.802	56.952	92.496	Non
Penner mut	h16c3	242.599	56.952	92.496	Non
Penner mut	h16c3	240.332	56.952	92.496	Non
Penner mut	h16c3	246.061	56.952	92.496	Non
Penner mut	h16c3	250.487	56.952	92.496	Non
Penner mut	h16c3	238.658	56.952	92.496	Non
Penner mut	h16c3	257.803	53.278	86.54	Non
Penner mut	h16c4	90.969	53.656	87.168	Non
Penner mut	h16c4	163.652	53.656	87.168	Non
Penner mut	h16c4	221.899	54.412	88.386	Non
Penner mut	h16c4	280.574	54.412	88.386	Non
Penner mut	h16c4	278.63	54.412	88.386	Non
Penner mut	h16c4	267.819	54.412	88.386	Non
Penner mut	h16c4	272.443	54.412	88.386	Non
Penner mut	h16c4	298.847	54.412	88.386	Non
Penner mut	h16c4	310.089	54.412	88.386	Non
Penner mut	h16c4	297.851	54.412	88.386	Non
Penner mut	h1c1	158.51	60.49	92.819	Non
Penner mut	h1c1	241.669	60.611	93.019	Non
Penner mut	h1c1	369.931	60.732	93.222	Non
Penner mut	h1c1	472.212	60.672	93.115	Non
Penner mut	h1c1	560.197	60.672	93.115	Non
Penner mut	h1c1	639.529	60.672	93.115	Non
Penner mut	h1c1	733.63	60.672	93.115	Non
Penner mut	h1c1	853.631	60.066	92.182	Non
Penner mut	h1c1	863.804	60.066	92.182	Non
Penner mut	h1c2	300.461	41.235	63.242	Non
Penner mut	h1c2	395.31	41.235	63.242	Non
Penner mut	h1c2	489.817	41.235	63.242	Non
Penner mut	h1c2	574.368	41.235	63.242	Non
Penner mut	h1c2	694.501	41.235	63.242	Non
Penner mut	h1c2	794.547	41.235	63.242	Non
Penner mut	h1c2	854.57	41.235	63.242	Non
Penner mut	h1c2	866.916	41.235	63.242	Non
Penner mut	h1c2	935.418	39.237	60.177	Non
Penner mut	h1c2	941.028	39.237	60.177	Non
Penner mut	h1c3	176.71	55.525	85.212	Non
Penner mut	h1c3	238.851	55.525	85.212	Non
Penner mut	h1c3	316.602	55.525	85.212	Non
Penner mut	h1c3	391.804	55.525	85.212	Non
Penner mut	h1c3	553.894	55.404	85.028	Non
Penner mut	h1c3	670.371	55.404	85.028	Non
Penner mut	h1c3	759.359	55.404	85.028	Non
Penner mut	h1c3	740.229	51.347	78.795	Non
Penner mut	h1c3	737.756	51.347	78.795	Non
Penner mut	h1c3	725.827	51.347	78.795	Non
Penner mut	h1c4	141.495	47.532	72.919	Non
Penner mut	h1c4	208.348	47.532	72.919	Non
Penner mut	h1c4	282.201	47.532	72.919	Non
Penner mut	h1c4	339.094	47.532	72.919	Non
Penner mut	h1c4	454.726	46.866	71.907	Non
Penner mut	h1c4	565.826	46.866	71.907	Non
Penner mut	h1c4	655.493	46.866	71.907	Non
Penner mut	h1c4	723.625	46.866	71.907	Non
Penner mut	h1c4	752.357	46.866	71.907	Non
Penner mut	h1c4	747.946	46.866	71.907	Non
Penner mut	h2c1	177.682	47.653	73.093	Non
Penner mut	h2c1	253.394	47.653	73.093	Non
Penner mut	h2c1	398.893	47.472	72.837	Non
Penner mut	h2c1	524.968	47.472	72.837	Non
Penner mut	h2c1	623.203	47.472	72.837	Non
Penner mut	h2c1	750.601	46.806	71.808	Non
Penner mut	h2c1	715.377	46.806	71.808	Non
Penner mut	h2c1	712.176	45.716	70.116	Non
Penner mut	h2c1	647.148	45.716	70.116	Non
Penner mut	h2c2	172.544	48.198	73.94	Non
Penner mut	h2c2	251.019	48.198	73.94	Non
Penner mut	h2c2	333.198	48.198	73.94	Non
Penner mut	h2c2	431.124	48.198	73.94	Non
Penner mut	h2c2	619.433	47.835	73.399	Non
Penner mut	h2c2	712.139	47.835	73.399	Non
Penner mut	h2c2	792.416	47.835	73.399	Non
Penner mut	h2c2	794.128	47.835	73.399	Non
Penner mut	h2c2	748.604	47.835	73.399	Non
Penner mut	h2c3	184.117	46.806	71.791	Non
Penner mut	h2c3	287.475	46.806	71.791	Non
Penner mut	h2c3	393.396	46.806	71.791	Non
Penner mut	h2c3	529.476	46.806	71.791	Non
Penner mut	h2c3	641.431	46.806	71.791	Non
Penner mut	h2c3	736.311	46.806	71.791	Non
Penner mut	h2c3	834.048	46.503	71.336	Non
Penner mut	h2c3	835.856	46.503	71.336	Non
Penner mut	h2c3	919.775	45.231	69.399	Non
Penner mut	h2c3	847.483	45.231	69.399	Non
Penner mut	h2c4	200.176	45.474	69.758	Non
Penner mut	h2c4	294.349	45.474	69.758	Non
Penner mut	h2c4	430.64	45.413	69.67	Non
Penner mut	h2c4	548.654	45.413	69.67	Non
Penner mut	h2c4	698.143	47.653	73.107	Non
Penner mut	h2c4	751.828	47.653	73.107	Non
Penner mut	h2c4	734.096	47.653	73.107	Non
Penner mut	h2c4	669.487	47.653	73.107	Non
Penner mut	h2c5	170.2	44.565	68.361	Non
Penner mut	h2c5	267.593	44.565	68.361	Non
Penner mut	h2c5	368.871	44.565	68.361	Non
Penner mut	h2c5	498.658	45.776	70.247	Non
Penner mut	h2c5	584.392	45.776	70.247	Non
Penner mut	h2c5	735.853	46.079	70.692	Non
Penner mut	h2c5	749.658	46.079	70.692	Non
Penner mut	h2c5	768.835	46.321	71.038	Non
Penner mut	h3c1	111.708	46.806	71.797	Non
Penner mut	h3c1	160.34	46.806	71.797	Non
Penner mut	h3c1	223.873	46.261	70.965	Non
Penner mut	h3c1	295.39	46.261	70.965	Non
Penner mut	h3c1	343.47	46.261	70.965	Non
Penner mut	h3c1	387.76	46.261	70.965	Non
Penner mut	h3c1	466.185	46.2	70.877	Non
Penner mut	h3c1	490.723	46.806	71.792	Non
Penner mut	h3c2	112.319	53.587	82.237	Non
Penner mut	h3c2	164.863	53.587	82.237	Non
Penner mut	h3c2	222.372	53.587	82.237	Non
Penner mut	h3c2	282.606	53.587	82.237	Non
Penner mut	h3c2	345.689	53.587	82.223	Non
Penner mut	h3c2	416.514	53.587	82.223	Non
Penner mut	h3c2	459.352	53.709	82.419	Non
Penner mut	h3c2	465.56	53.709	82.419	Non
Penner mut	h3c3	115.251	65.092	99.899	Non
Penner mut	h3c3	159.006	65.092	99.899	Non
Penner mut	h3c3	214.01	65.092	99.899	Non
Penner mut	h3c3	274.939	65.092	99.899	Non
Penner mut	h3c3	337.24	66.848	102.587	Non
Penner mut	h3c3	378.834	66.848	102.587	Non
Penner mut	h3c3	412.728	66.848	102.587	Non
Penner mut	h3c3	398.472	66.848	102.587	Non
Penner mut	h3c4	175.244	53.648	82.313	Non
Penner mut	h3c4	256.573	53.648	82.313	Non
Penner mut	h3c4	340.971	53.648	82.313	Non
Penner mut	h3c4	444.216	53.769	82.506	Non
Penner mut	h3c4	549.099	53.769	82.506	Non
Penner mut	h3c4	633.064	53.769	82.506	Non
Penner mut	h3c4	663.906	53.769	82.506	Non
Penner mut	h4c1	128.953	57.22	87.807	Non
Penner mut	h4c1	216.177	57.22	87.807	Non
Penner mut	h4c1	309.038	57.22	87.807	Non
Penner mut	h4c2	110.142	51.892	79.621	Non
Penner mut	h4c2	170.968	53.103	81.482	Non
Penner mut	h4c2	213.756	53.103	81.482	Non
Penner mut	h4c2	223.792	53.103	81.482	Non
Penner mut	h4c2	313.252	48.925	75.066	Non
Penner mut	h4c2	317.646	48.925	75.066	Non
Penner mut	h4c3	75.398	49.954	76.652	Non
Penner mut	h4c3	131.225	50.075	76.824	Non
Penner mut	h4c3	251.88	50.075	76.824	Non
Penner mut	h4c3	350.182	47.108	72.276	Non
Penner mut	h4c3	339.216	47.108	72.276	Non
Penner mut	h4c4	106.405	58.795	90.222	Non
Penner mut	h4c4	165.505	58.795	90.222	Non
Penner mut	h4c4	263.052	58.129	89.211	Non
Penner mut	h4c4	302.542	58.129	89.211	Non
Penner mut	h5c1	94.179	46.745	71.707	Non
Penner mut	h5c1	120.801	46.745	71.707	Non
Penner mut	h5c1	163.16	46.745	71.707	Non
Penner mut	h5c1	207.721	46.745	71.707	Non
Penner mut	h5c1	251.884	46.745	71.707	Non
Penner mut	h5c1	308.42	46.745	71.707	Non
Penner mut	h5c1	344.328	46.745	71.707	Non
Penner mut	h5c1	381.946	46.745	71.707	Non
Penner mut	h5c1	401.742	46.745	71.707	Non
Penner mut	h5c2	80.055	53.89	82.691	Non
Penner mut	h5c2	120.562	53.89	82.691	Non
Penner mut	h5c2	149.731	53.89	82.691	Non
Penner mut	h5c2	187.236	54.738	83.993	Non
Penner mut	h5c2	220.421	54.738	83.993	Non
Penner mut	h5c2	251.909	54.738	83.993	Non
Penner mut	h5c2	282.169	54.738	83.993	Non
Penner mut	h5c2	308.207	54.738	83.993	Non
Penner mut	h5c2	329.442	54.738	83.993	Non
Penner mut	h5c3	61.153	59.34	91.069	Non
Penner mut	h5c3	100.783	59.34	91.069	Non
Penner mut	h5c3	126.138	59.34	91.069	Non
Penner mut	h5c3	146.788	59.34	91.069	Non
Penner mut	h5c3	172.455	59.34	91.069	Non
Penner mut	h5c3	202.308	59.34	91.069	Non
Penner mut	h5c3	218.565	59.34	91.069	Non
Penner mut	h5c3	255.145	59.34	91.069	Non
Penner mut	h5c3	273.836	59.34	91.069	Non
Penner mut	h5c3	283.272	59.34	91.069	Non
Penner mut	h5c3	287.361	59.34	91.069	Non
Penner mut	h5c4	74.402	48.017	73.67	Non
Penner mut	h5c4	104.897	48.017	73.67	Non
Penner mut	h5c4	149.394	48.017	73.67	Non
Penner mut	h5c4	192.795	48.017	73.67	Non
Penner mut	h5c4	242.618	48.017	73.67	Non
Penner mut	h5c4	294.005	48.017	73.67	Non
Penner mut	h5c4	350.14	48.017	73.67	Non
Penner mut	h5c4	397.415	48.017	73.67	Non
Penner mut	h5c4	400.549	48.017	73.67	Non
Penner mut	h5c5	90.924	47.169	72.362	Non
Penner mut	h5c5	117.701	47.169	72.362	Non
Penner mut	h5c5	139.621	47.169	72.362	Non
Penner mut	h5c5	170.85	47.169	72.362	Non
Penner mut	h5c5	198.99	47.169	72.362	Non
Penner mut	h5c5	229.773	47.169	72.362	Non
Penner mut	h5c5	271.192	47.169	72.362	Non
Penner mut	h5c5	308.678	47.169	72.362	Non
Penner mut	h6c1	96.915	44.444	68.186	Non
Penner mut	h6c1	141.997	44.444	68.186	Non
Penner mut	h6c1	186.005	44.444	68.186	Non
Penner mut	h6c1	272.834	44.444	68.186	Non
Penner mut	h6c1	329.502	44.444	68.186	Non
Penner mut	h6c1	381.059	44.444	68.186	Non
Penner mut	h6c1	418.623	44.444	68.186	Non
Penner mut	h6c1	430.271	44.444	68.186	Non
Penner mut	h6c1	431.193	44.444	68.186	Non
Penner mut	h6c2	79.468	54.253	83.252	Non
Penner mut	h6c2	122.073	54.253	83.252	Non
Penner mut	h6c2	144.66	54.253	83.252	Non
Penner mut	h6c2	181.92	54.253	83.252	Non
Penner mut	h6c2	260.244	53.285	81.748	Non
Penner mut	h6c2	307.007	53.285	81.748	Non
Penner mut	h6c2	375.617	53.285	81.748	Non
Penner mut	h6c2	415.997	53.285	81.748	Non
Penner mut	h6c2	458.513	53.285	81.748	Non
Penner mut	h6c3	94.866	54.072	82.97	Non
Penner mut	h6c3	114.381	54.072	82.97	Non
Penner mut	h6c3	139.987	54.072	82.97	Non
Penner mut	h6c3	168.017	54.072	82.97	Non
Penner mut	h6c3	191.785	54.072	82.97	Non
Penner mut	h6c3	225.38	54.072	82.97	Non
Penner mut	h6c3	254.906	54.072	82.97	Non
Penner mut	h6c3	285.903	54.072	82.97	Non
Penner mut	h6c3	297.486	54.072	82.97	Non
Penner mut	h6c4	75.491	45.655	70.037	Non
Penner mut	h6c4	127.133	45.655	70.037	Non
Penner mut	h6c4	153.887	45.655	70.037	Non
Penner mut	h6c4	187.228	45.655	70.037	Non
Penner mut	h6c4	235.459	45.655	70.037	Non
Penner mut	h6c4	274.773	45.655	70.037	Non
Penner mut	h6c4	343.476	45.655	70.037	Non
Penner mut	h6c4	380.457	45.655	70.037	Non
Penner mut	h6c4	410.185	45.655	70.037	Non
Penner mut	h6c4	397.842	45.655	70.037	Non
Penner mut	h6c5	99.724	53.345	81.858	Non
Penner mut	h6c5	161.321	53.345	81.858	Non
Penner mut	h6c5	183.702	53.345	81.858	Non
Penner mut	h6c5	235.535	53.345	81.858	Non
Penner mut	h6c5	330.959	54.435	83.524	Non
Penner mut	h6c5	390.762	54.435	83.524	Non
Penner mut	h6c5	469.61	54.435	83.524	Non
Penner mut	h6c5	515.543	54.435	83.524	Non
Penner mut	h6c5	536.486	54.435	83.524	Non
Penner mut	h6c5	514.351	54.435	83.524	Non
Penner mut	h7c1	145.121	61.096	93.772	Non
Penner mut	h7c1	251.667	61.096	93.772	Non
Penner mut	h7c1	353.347	61.096	93.772	Non
Penner mut	h7c1	436.133	61.096	93.772	Non
Penner mut	h7c1	505.8	61.096	93.772	Non
Penner mut	h7c1	515.256	61.096	93.772	Non
Penner mut	h7c2	101.309	60.006	92.087	Non
Penner mut	h7c2	143.599	60.187	92.372	Non
Penner mut	h7c2	209.082	60.187	92.372	Non
Penner mut	h7c2	260.613	60.187	92.372	Non
Penner mut	h7c2	301.725	60.187	92.372	Non
Penner mut	h7c2	312.987	53.042	81.376	Non
Penner mut	h7c2	344.495	53.042	81.376	Non
Penner mut	h7c3	139.633	63.154	96.91	Non
Penner mut	h7c3	199.511	63.154	96.91	Non
Penner mut	h7c3	249.071	63.154	96.91	Non
Penner mut	h7c3	289.277	63.154	96.91	Non
Penner mut	h7c3	301.217	63.154	96.91	Non
Penner mut	h7c3	297.468	63.154	96.91	Non
Penner mut	h7c4	168.379	67.696	103.9	Non
Penner mut	h7c4	223.794	67.696	103.9	Non
Penner mut	h7c4	288.09	67.696	103.9	Non
Penner mut	h7c4	318.048	67.696	103.9	Non
Penner mut	h7c4	350.952	67.696	103.9	Non
Penner mut	h7c4	373.152	67.696	103.9	Non
Penner mut	h7c4	358.031	67.696	103.9	Non
Penner mut	h8c1	72.675	42.567	65.306	Non
Penner mut	h8c1	111.61	42.567	65.306	Non
Penner mut	h8c1	153.229	42.567	65.306	Non
Penner mut	h8c1	201.105	42.567	65.306	Non
Penner mut	h8c1	260.6	42.204	64.745	Non
Penner mut	h8c1	318.342	42.204	64.745	Non
Penner mut	h8c1	325.244	42.204	64.745	Non
Penner mut	h8c1	380.555	42.204	64.745	Non
Penner mut	h8c1	425.317	42.204	64.745	Non
Penner mut	h8c1	448.374	42.204	64.745	Non
Penner mut	h8c1	432.109	42.204	64.745	Non
Penner mut	h8c2	85.593	53.466	82.037	Non
Penner mut	h8c2	128.104	53.466	82.037	Non
Penner mut	h8c2	185.556	53.466	82.037	Non
Penner mut	h8c2	243.719	53.709	82.417	Non
Penner mut	h8c2	274.404	53.709	82.417	Non
Penner mut	h8c2	338.395	53.709	82.417	Non
Penner mut	h8c2	374.809	53.709	82.417	Non
Penner mut	h8c2	394.155	53.709	82.417	Non
Penner mut	h8c2	381.346	53.709	82.417	Non
Penner mut	h8c3	115.469	57.523	88.262	Non
Penner mut	h8c3	170.391	57.523	88.262	Non
Penner mut	h8c3	221.602	57.523	88.262	Non
Penner mut	h8c3	263.88	57.523	88.262	Non
Penner mut	h8c3	315.027	57.523	88.262	Non
Penner mut	h8c3	370.386	57.523	88.262	Non
Penner mut	h8c3	406.979	57.523	88.262	Non
Penner mut	h8c3	495.859	53.648	82.316	Non
Penner mut	h8c3	431.263	53.648	82.316	Non
Penner mut	h8c3	364.591	53.648	82.316	Non
Penner mut	h8c4	146.619	54.92	84.259	Non
Penner mut	h8c4	192.613	54.92	84.259	Non
Penner mut	h8c4	249.87	54.92	84.259	Non
Penner mut	h8c4	257.389	54.92	84.259	Non
Penner mut	h8c4	312.781	54.92	84.259	Non
Penner mut	h8c4	402.881	53.951	82.786	Non
Penner mut	h8c4	420.001	53.951	82.786	Non
Penner mut	h8c4	392.134	53.951	82.786	Non
Penner mut	h8c5	114.061	57.342	87.986	Non
Penner mut	h8c5	158.705	57.342	87.986	Non
Penner mut	h8c5	199.17	57.342	87.986	Non
Penner mut	h8c5	236.301	57.342	87.986	Non
Penner mut	h8c5	304.44	57.402	88.096	Non
Penner mut	h8c5	345.391	57.402	88.096	Non
Penner mut	h8c5	402.27	57.402	88.096	Non
Penner mut	h8c5	423.642	57.402	88.096	Non
Penner mut	h8c5	407.69	57.402	88.096	Non
Penner mut	h8c6	121.004	52.013	79.791	Non
Penner mut	h8c6	163.593	52.013	79.791	Non
Penner mut	h8c6	217.699	52.013	79.791	Non
Penner mut	h8c6	264.228	52.013	79.791	Non
Penner mut	h8c6	283.057	52.013	79.791	Non
Penner mut	h8c6	301.5	52.013	79.791	Non
Penner mut	h8c6	297.629	52.013	79.791	Non
Penner mut	h9c1	146.916	62.301	101.219	Non
Penner mut	h9c1	144.681	62.301	101.219	Non
Penner mut	h9c1	170.603	62.301	101.215	Non
Penner mut	h9c1	198.872	62.301	101.215	Non
Penner mut	h9c1	231.115	62.301	101.215	Non
Penner mut	h9c1	306.426	56.736	92.171	Non
Penner mut	h9c1	247.29	57.114	92.804	Non
Penner mut	h9c2	157.855	48.955	79.53	Non
Penner mut	h9c2	231.091	48.955	79.53	Non
Penner mut	h9c2	246.609	48.955	79.53	Non
Penner mut	h9c2	273.789	49.063	79.703	Non
Penner mut	h9c2	292.024	45.605	74.074	Non
Penner mut	h9c3	170.754	51.062	82.949	Non
Penner mut	h9c3	218.517	51.062	82.949	Non
Penner mut	h9c3	234.627	51.062	82.949	Non
Penner mut	h9c3	273.111	51.062	82.949	Non
Penner mut	h9c3	371.794	48.901	79.445	Non
Penner mut	h9c4	153.135	45.929	74.601	Non
Penner mut	h9c4	190.812	45.929	74.601	Non
Penner mut	h9c4	205.836	45.335	73.621	Non
Penner mut	h9c4	245.289	45.173	73.373	Non
Penner mut	h9c4	285.103	43.335	70.38	Non
Penner mut	h9c4	317.729	43.335	70.38	Non
Penner mut	h17c1	118.775	41.066	66.69	Non
Penner mut	h17c1	146.48	41.066	66.69	Non
Penner mut	h17c1	168.339	41.066	66.69	Non
Penner mut	h17c1	185.57	41.174	66.864	Non
Penner mut	h17c1	199.341	41.174	66.864	Non
Penner mut	h17c1	216.817	41.174	66.864	Non
Penner mut	h17c1	220.538	41.174	66.864	Non
Penner mut	h17c1	217.013	41.174	66.864	Non
Penner mut	h17c2	106.724	50.792	82.496	Non
Penner mut	h17c2	131.752	50.792	82.496	Non
Penner mut	h17c2	158.252	50.792	82.496	Non
Penner mut	h17c2	175.218	50.792	82.496	Non
Penner mut	h17c2	191.569	50.792	82.496	Non
Penner mut	h17c2	208.881	50.792	82.496	Non
Penner mut	h17c2	215.16	50.792	82.496	Non
Penner mut	h17c2	217.953	50.792	82.496	Non
Penner mut	h17c2	215.989	50.792	82.496	Non
Penner mut	h17c3	96.213	58.465	94.98	Non
Penner mut	h17c3	110.708	58.465	94.98	Non
Penner mut	h17c3	129.004	58.465	94.98	Non
Penner mut	h17c3	145.104	58.465	94.98	Non
Penner mut	h17c3	163.69	58.465	94.98	Non
Penner mut	h17c3	191.589	58.465	94.98	Non
Penner mut	h17c3	205.59	58.465	94.98	Non
Penner mut	h17c3	207.398	58.465	94.98	Non
Penner mut	h17c3	203.753	58.465	94.98	Non
Penner mut	h17c3	197.057	58.465	94.98	Non
Penner mut	h17c3	190.255	58.465	94.98	Non
Penner mut	h17c4	116.677	52.251	84.887	Non
Penner mut	h17c4	131.467	52.251	84.887	Non
Penner mut	h17c4	141.352	52.251	84.887	Non
Penner mut	h17c4	151.171	52.251	84.887	Non
Penner mut	h17c4	164.242	52.251	84.887	Non
Penner mut	h17c4	172.925	52.251	84.887	Non
Penner mut	h17c4	181.361	54.899	89.192	Non
Penner mut	h17c4	180.585	54.899	89.192	Non
Penner mut	h17c4	176.051	54.899	89.192	Non
Penner mut	h18c1	110.129	49.603	80.567	Non
Penner mut	h18c1	130.16	49.603	80.567	Non
Penner mut	h18c1	154.345	49.603	80.567	Non
Penner mut	h18c1	173.955	49.603	80.567	Non
Penner mut	h18c1	188.584	49.603	80.567	Non
Penner mut	h18c1	205.573	49.603	80.567	Non
Penner mut	h18c1	222.227	49.603	80.567	Non
Penner mut	h18c1	232.586	49.603	80.567	Non
Penner mut	h18c1	243.289	49.603	80.567	Non
Penner mut	h18c1	273.574	48.685	79.084	Non
Penner mut	h18c1	280.253	48.685	79.084	Non
Penner mut	h18c1	283.207	48.685	79.084	Non
Penner mut	h18c2	123.805	50.792	82.491	Non
Penner mut	h18c2	139.588	50.792	82.491	Non
Penner mut	h18c2	153.528	50.792	82.491	Non
Penner mut	h18c2	166.875	50.792	82.491	Non
Penner mut	h18c2	178.151	50.792	82.491	Non
Penner mut	h18c2	188.167	50.576	82.135	Non
Penner mut	h18c2	195.448	50.576	82.135	Non
Penner mut	h18c2	206.932	50.576	82.135	Non
Penner mut	h18c2	227.008	50.576	82.135	Non
Penner mut	h18c2	241.992	50.576	82.135	Non
Penner mut	h18c2	248.591	50.576	82.135	Non
Penner mut	h18c2	250.319	50.576	82.135	Non
Penner mut	h18c2	248.917	50.576	82.135	Non
Penner mut	h18c3	130.504	50.63	82.246	Non
Penner mut	h18c3	147.609	50.63	82.246	Non
Penner mut	h18c3	159.793	50.63	82.246	Non
Penner mut	h18c3	193.017	49.387	80.22	Non
Penner mut	h18c3	209.083	49.387	80.22	Non
Penner mut	h18c3	220.769	49.387	80.22	Non
Penner mut	h18c3	231.753	49.387	80.22	Non
Penner mut	h18c3	245.664	49.387	80.22	Non
Penner mut	h18c3	264.566	49.387	80.22	Non
Penner mut	h18c3	280.516	49.387	80.22	Non
Penner mut	h18c4	133.226	45.065	73.188	Non
Penner mut	h18c4	152.694	45.065	73.188	Non
Penner mut	h18c4	176.11	45.065	73.188	Non
Penner mut	h18c4	194.758	45.065	73.188	Non
Penner mut	h18c4	206.694	45.065	73.188	Non
Penner mut	h18c4	218.466	45.065	73.188	Non
Penner mut	h18c4	237.176	45.065	73.188	Non
Penner mut	h18c4	261.749	45.065	73.188	Non
Penner mut	h18c4	281.492	45.065	73.188	Non
Penner mut	h18c4	287.983	45.065	73.188	Non
Penner mut	h18c4	280.957	45.065	73.188	Non
Penner mut	h19c1	109.009	58.627	95.247	Non
Penner mut	h19c1	124.452	58.627	95.247	Non
Penner mut	h19c1	142.389	58.627	95.247	Non
Penner mut	h19c1	155.198	58.627	95.247	Non
Penner mut	h19c1	164.474	58.627	95.247	Non
Penner mut	h19c1	174.905	58.627	95.247	Non
Penner mut	h19c1	174.905	58.627	95.247	Non
Penner mut	h19c1	184.553	58.627	95.247	Non
Penner mut	h19c2	121.01	61.653	100.164	Non
Penner mut	h19c2	140.647	61.653	100.164	Non
Penner mut	h19c2	157.287	61.653	100.164	Non
Penner mut	h19c2	166.993	61.653	100.164	Non
Penner mut	h19c2	177.275	61.653	100.164	Non
Penner mut	h19c2	185.216	61.653	100.164	Non
Penner mut	h19c2	186.444	61.653	100.164	Non
Penner mut	h19c2	181.692	61.653	100.164	Non
Penner mut	h19c3	109.704	60.951	99.035	Non
Penner mut	h19c3	126.642	60.951	99.035	Non
Penner mut	h19c3	141.696	60.951	99.035	Non
Penner mut	h19c3	154.687	60.951	99.035	Non
Penner mut	h19c3	169.936	60.951	99.035	Non
Penner mut	h19c3	186.169	60.951	99.035	Non
Penner mut	h19c3	194.986	60.951	99.035	Non
Penner mut	h19c3	196.343	60.951	99.035	Non
Penner mut	h20c1	92.121	60.086	97.619	Non
Penner mut	h20c1	97.952	60.086	97.619	Non
Penner mut	h20c1	105.327	60.086	97.619	Non
Penner mut	h20c1	112.661	60.086	97.619	Non
Penner mut	h20c1	116.18	60.572	98.416	Non
Penner mut	h20c1	122.736	60.572	98.416	Non
Penner mut	h20c1	128.331	60.572	98.416	Non
Penner mut	h20c1	129.891	60.572	98.416	Non
Penner mut	h20c1	132.738	60.572	98.416	Non
Penner mut	h20c1	135.511	60.572	98.416	Non
Penner mut	h20c1	137.102	60.572	98.416	Non
Penner mut	h20c2	100.043	57.546	93.49	Non
Penner mut	h20c2	109.703	57.546	93.49	Non
Penner mut	h20c2	123.086	57.546	93.49	Non
Penner mut	h20c2	135.481	57.546	93.49	Non
Penner mut	h20c2	146.15	57.546	93.49	Non
Penner mut	h20c2	162.22	57.168	92.885	Non
Penner mut	h20c2	168.547	57.168	92.885	Non
Penner mut	h20c2	168.422	57.168	92.885	Non
Penner mut	h20c2	167.318	57.168	92.885	Non
Penner mut	h20c2	166.082	57.168	92.885	Non
Penner mut	h20c2	167.476	57.168	92.885	Non
Penner mut	h20c2	168.187	57.168	92.885	Non
Penner mut	h20c3	92.768	49.333	80.147	Non
Penner mut	h20c3	98.611	49.333	80.147	Non
Penner mut	h20c3	107.375	49.333	80.147	Non
Penner mut	h20c3	114.426	49.333	80.147	Non
Penner mut	h20c3	125.016	49.333	80.147	Non
Penner mut	h20c3	135.953	49.333	80.147	Non
Penner mut	h20c3	141.562	49.333	80.147	Non
Penner mut	h20c3	144.443	49.333	80.147	Non
Penner mut	h20c3	146.968	49.333	80.147	Non
Penner mut	h20c3	148.222	49.333	80.147	Non
Penner mut	h20c3	150.148	49.333	80.147	Non
Penner mut	h21c1	108.862	49.657	80.657	Non
Penner mut	h21c1	120.358	49.657	80.657	Non
Penner mut	h21c1	138.255	49.657	80.657	Non
Penner mut	h21c1	153.826	49.657	80.657	Non
Penner mut	h21c1	164.56	49.657	80.657	Non
Penner mut	h21c1	176.582	49.495	80.394	Non
Penner mut	h21c1	183.743	49.495	80.394	Non
Penner mut	h21c1	190.207	49.495	80.394	Non
Penner mut	h21c2	109.368	46.091	74.868	Non
Penner mut	h21c2	121.101	46.091	74.868	Non
Penner mut	h21c2	137.187	46.091	74.868	Non
Penner mut	h21c2	156.242	46.091	74.868	Non
Penner mut	h21c2	173.863	46.091	74.868	Non
Penner mut	h21c2	199.483	46.523	75.564	Non
Penner mut	h21c2	210.508	46.523	75.564	Non
Penner mut	h21c2	221.654	46.523	75.564	Non
Penner mut	h21c2	223.958	46.523	75.564	Non
Penner mut	h21c2	220.429	46.523	75.564	Non
Penner mut	h21c3	121.401	53.602	87.096	Non
Penner mut	h21c3	134.964	53.602	87.096	Non
Penner mut	h21c3	150.468	53.602	87.096	Non
Penner mut	h21c3	163.32	53.602	87.096	Non
Penner mut	h21c3	175.213	53.602	87.096	Non
Penner mut	h21c3	188.173	53.548	86.979	Non
Penner mut	h21c3	193.985	53.548	86.979	Non
Penner mut	h21c3	201.589	53.548	86.979	Non
Penner mut	h21c4	110.207	40.958	66.519	Non
Penner mut	h21c4	126.307	40.958	66.519	Non
Penner mut	h21c4	144.342	40.958	66.519	Non
Penner mut	h21c4	164.821	40.958	66.519	Non
Penner mut	h21c4	179.278	40.958	66.519	Non
Penner mut	h21c4	188.295	40.958	66.519	Non
Penner mut	h21c4	193.759	40.958	66.519	Non
Penner mut	h21c4	196.944	40.958	66.519	Non
Penner mut	h21c4	197.458	40.958	66.519	Non
Penner mut	h22c1	113.476	48.144	78.195	Non
Penner mut	h22c1	122.162	48.144	78.195	Non
Penner mut	h22c1	135.864	48.144	78.195	Non
Penner mut	h22c1	148.797	48.144	78.195	Non
Penner mut	h22c1	163.56	48.144	78.195	Non
Penner mut	h22c1	177.001	48.144	78.195	Non
Penner mut	h22c1	198.452	48.955	79.525	Non
Penner mut	h22c1	213.51	48.955	79.525	Non
Penner mut	h22c1	219.174	48.955	79.525	Non
Penner mut	h22c1	215.682	48.955	79.525	Non
Penner mut	h22c2	114.324	44.956	73.032	Non
Penner mut	h22c2	125.703	44.956	73.032	Non
Penner mut	h22c2	141.351	44.956	73.032	Non
Penner mut	h22c2	157.577	44.956	73.032	Non
Penner mut	h22c2	177.303	44.956	73.032	Non
Penner mut	h22c2	192.053	44.956	73.032	Non
Penner mut	h22c2	207.45	44.956	73.032	Non
Penner mut	h22c2	216.682	44.956	73.032	Non
Penner mut	h22c2	217.371	44.956	73.032	Non
Penner mut	h22c2	208.387	44.956	73.032	Non
Penner mut	h22c3	91.574	47.118	76.535	Non
Penner mut	h22c3	94.503	47.118	76.535	Non
Penner mut	h22c3	100.718	47.118	76.535	Non
Penner mut	h22c3	108.166	47.118	76.535	Non
Penner mut	h22c3	116.689	47.118	76.535	Non
Penner mut	h22c3	130.671	47.82	77.672	Non
Penner mut	h22c3	142.462	47.82	77.672	Non
Penner mut	h22c3	156.266	47.82	77.672	Non
Penner mut	h22c3	168.694	47.82	77.672	Non
Penner mut	h22c3	179.979	47.82	77.672	Non
Penner mut	h22c3	185.956	47.82	77.672	Non
Penner mut	h22c3	189.864	47.82	77.672	Non
Penner mut	h22c3	190.322	47.82	77.672	Non
Penner mut	h22c3	184.492	47.82	77.672	Non
Penner mut	h22c4	112.608	46.145	74.944	Non
Penner mut	h22c4	126.895	46.145	74.944	Non
Penner mut	h22c4	140.611	46.145	74.944	Non
Penner mut	h22c4	152.586	46.145	74.944	Non
Penner mut	h22c4	164.126	46.145	74.944	Non
Penner mut	h22c4	177.066	46.145	74.944	Non
Penner mut	h22c4	189.725	46.145	74.944	Non
Penner mut	h22c4	198.985	47.55	77.233	Non
Penner mut	h22c4	202.822	47.55	77.233	Non
Penner mut	h22c4	199.016	47.55	77.233	Non
Penner mut	h22c4	191.22	47.55	77.233	Non
Penner mut	h23c1	119.717	47.226	76.715	Non
Penner mut	h23c1	129.624	47.226	76.715	Non
Penner mut	h23c1	141.398	47.226	76.715	Non
Penner mut	h23c1	153.397	47.226	76.715	Non
Penner mut	h23c1	161.503	47.226	76.715	Non
Penner mut	h23c1	167.164	47.226	76.715	Non
Penner mut	h23c1	170.57	47.226	76.715	Non
Penner mut	h23c1	169.766	47.226	76.715	Non
Penner mut	h23c1	167.36	47.226	76.715	Non
Penner mut	h23c2	179.277	50.846	82.596	Non
Penner mut	h23c2	194.767	50.846	82.596	Non
Penner mut	h23c2	199.943	50.846	82.596	Non
Penner mut	h23c2	200.312	50.846	82.596	Non
Penner mut	h23c2	196.568	50.846	82.596	Non
Penner mut	h23c2	190.511	50.846	82.596	Non
Penner mut	h23c2	183.187	50.846	82.596	Non
Penner mut	h23c3	145.608	53.872	87.511	Non
Penner mut	h23c3	165.556	53.872	87.511	Non
Penner mut	h23c3	185.808	53.872	87.511	Non
Penner mut	h23c3	197.366	53.872	87.511	Non
Penner mut	h23c3	208.499	53.872	87.511	Non
Penner mut	h23c3	217.763	53.872	87.511	Non
Penner mut	h23c3	217.898	53.872	87.511	Non
Penner mut	h23c3	215.533	53.872	87.511	Non
Penner mut	h23c3	209.035	53.872	87.511	Non
Penner mut	h23c4	117.495	43.93	71.357	Non
Penner mut	h23c4	135.17	43.93	71.357	Non
Penner mut	h23c4	163.105	43.93	71.357	Non
Penner mut	h23c4	191.789	43.93	71.357	Non
Penner mut	h23c4	203.071	43.93	71.357	Non
Penner mut	h23c4	216.793	43.93	71.357	Non
Penner mut	h23c4	261.268	44.254	71.876	Non
Penner mut	h23c4	274.305	44.254	71.876	Non
Penner mut	h23c4	268.65	44.254	71.876	Non
Penner mut	h23c4	255.243	44.254	71.876	Non
Penner mut	h23c4	233.907	44.254	71.876	Non
Penner mut	h24c1	114.871	50.198	81.548	Non
Penner mut	h24c1	134.294	50.198	81.548	Non
Penner mut	h24c1	151.67	50.198	81.548	Non
Penner mut	h24c1	167.726	50.198	81.548	Non
Penner mut	h24c1	179.892	50.198	81.548	Non
Penner mut	h24c1	192.337	50.198	81.548	Non
Penner mut	h24c1	210.84	47.442	77.057	Non
Penner mut	h24c1	207.865	47.442	77.057	Non
Penner mut	h24c1	200.66	47.442	77.057	Non
Penner mut	h24c2	109.634	54.899	89.168	Non
Penner mut	h24c2	126.397	54.899	89.168	Non
Penner mut	h24c2	144.503	54.899	89.168	Non
Penner mut	h24c2	157.981	54.899	89.168	Non
Penner mut	h24c2	171.652	54.845	89.085	Non
Penner mut	h24c2	180.186	54.845	89.085	Non
Penner mut	h24c2	189.03	54.845	89.085	Non
Penner mut	h24c2	198.212	53.98	87.7	Non
Penner mut	h24c2	202.184	53.98	87.7	Non
Penner mut	h24c3	106.903	56.844	92.354	Non
Penner mut	h24c3	123.541	56.844	92.354	Non
Penner mut	h24c3	138.59	56.844	92.354	Non
Penner mut	h24c3	149.574	55.115	89.538	Non
Penner mut	h24c3	152.619	55.115	89.538	Non
Penner mut	h24c3	157.339	55.115	89.538	Non
Penner mut	h24c3	160.967	55.115	89.538	Non
Penner mut	h24c3	167.551	55.115	89.538	Non
Penner mut	h24c3	171.029	55.115	89.538	Non
Penner mut	h24c3	172.481	55.115	89.538	Non
Penner mut	h24c3	170.865	55.115	89.538	Non
Penner mut	h24c4	104.541	51.17	83.132	Non
Penner mut	h24c4	117.929	51.17	83.132	Non
Penner mut	h24c4	126.973	51.17	83.132	Non
Penner mut	h24c4	152.941	51.603	83.815	Non
Penner mut	h24c4	160.441	51.603	83.815	Non
Penner mut	h24c4	167.53	51.603	83.815	Non
Penner mut	h24c4	167.811	51.603	83.815	Non
Penner mut	h24c4	167.506	53.008	86.124	Non
Penner mut	h24c4	168.083	53.008	86.124	Non
Penner mut	h24c4	166.655	53.008	86.124	Non
Penner mut	h24c4	162.34	53.008	86.124	Non
Penner mut	h24c5	121.765	44.632	72.497	Non
Penner mut	h24c5	133.631	44.632	72.497	Non
Penner mut	h24c5	146.993	44.632	72.497	Non
Penner mut	h24c5	158.327	44.632	72.497	Non
Penner mut	h24c5	172.963	44.308	71.979	Non
Penner mut	h24c5	179.089	44.308	71.979	Non
Penner mut	h24c5	180.766	44.308	71.979	Non
Penner mut	h25c1	170.567	43.66	70.912	Non
Penner mut	h25c1	187.159	43.66	70.912	Non
Penner mut	h25c1	195.352	43.66	70.912	Non
Penner mut	h25c1	206.563	43.66	70.912	Non
Penner mut	h25c1	213.696	43.66	70.912	Non
Penner mut	h25c1	215.673	43.66	70.912	Non
Penner mut	h25c1	212.715	43.66	70.912	Non
Penner mut	h25c2	129.929	45.767	74.344	Non
Penner mut	h25c2	139.539	45.767	74.344	Non
Penner mut	h25c2	147.662	45.767	74.344	Non
Penner mut	h25c2	158.616	45.767	74.344	Non
Penner mut	h25c2	171.404	45.767	74.344	Non
Penner mut	h25c2	178.75	45.767	74.344	Non
Penner mut	h25c2	190.708	45.767	74.344	Non
Penner mut	h25c2	199.873	45.767	74.344	Non
Penner mut	h25c2	197.184	45.767	74.344	Non
Penner mut	h25c3	101.275	50.684	82.325	Non
Penner mut	h25c3	109.963	50.684	82.325	Non
Penner mut	h25c3	118.781	50.684	82.325	Non
Penner mut	h25c3	130.236	50.684	82.325	Non
Penner mut	h25c3	142.833	50.684	82.325	Non
Penner mut	h25c3	154.719	50.684	82.325	Non
Penner mut	h25c3	164.174	50.684	82.325	Non
Penner mut	h25c3	173.799	50.684	82.325	Non
Penner mut	h25c3	184.347	50.684	82.325	Non
Penner mut	h25c3	191.597	50.684	82.325	Non
Penner mut	h25c3	194.447	52.089	84.625	Non
Penner mut	h25c3	187.889	52.089	84.625	Non
Penner mut	h25c4	119.677	58.303	94.713	Non
Penner mut	h25c4	127.506	58.303	94.713	Non
Penner mut	h25c4	136.811	58.303	94.713	Non
Penner mut	h25c4	150.255	58.303	94.713	Non
Penner mut	h25c4	166.676	58.303	94.713	Non
Penner mut	h25c4	178.954	58.303	94.713	Non
Penner mut	h25c4	188.807	58.303	94.713	Non
Penner mut	h25c4	199.655	58.303	94.713	Non
Penner mut	h25c4	210.556	58.303	94.713	Non
Penner mut	h25c4	210.312	58.303	94.713	Non
Penner mut	h25c4	207.408	58.303	94.713	Non
Penner mut	h25c4	199.109	58.303	94.713	Non
