# Supplementary material for: Stepwise polarisation of developing bilayered epidermis is mediated by aPKC and E-cadherin in zebrafish
Source: eLife. 2020 Jan 22;9:e49064. doi: 10.7554/eLife.49064 (PMC6975926; doi:10.7554/eLife.49064)
Supplement: Figure 3—source data 2. [file elife-49064-fig3-data2.csv]

Genotype	Cell name	Ecad levels	Area	Length	Boundary
Penner sib	h10c1	322.189	40.201	65.28	Non
Penner sib	h10c1	365.76	38.202	62.032	Non
Penner sib	h10c1	595.221	45.605	74.087	Non
Penner sib	h10c1	661.187	45.605	74.087	Non
Penner sib	h10c1	587.637	45.821	74.428	Non
Penner sib	h10c1	290.894	45.821	74.428	Non
Penner sib	h10c1	203.421	45.821	74.428	Non
Penner sib	h10c2	603.635	33.825	54.916	Non
Penner sib	h10c2	585.122	33.825	54.916	Non
Penner sib	h10c2	494.764	33.825	54.916	Non
Penner sib	h10c2	344.053	33.825	54.916	Non
Penner sib	h10c2	185.817	33.825	54.916	Non
Penner sib	h10c3	658.692	41.39	67.214	Non
Penner sib	h10c3	680.102	41.39	67.214	Non
Penner sib	h10c3	569.235	41.012	66.602	Non
Penner sib	h10c3	287.628	41.012	66.602	Non
Penner sib	h10c3	70.588	41.012	66.602	Non
Penner sib	h10c4	551.508	27.936	45.346	Non
Penner sib	h10c4	766.569	30.151	48.936	Non
Penner sib	h10c4	737.605	31.232	50.709	Non
Penner sib	h10c4	712.601	31.232	50.709	Non
Penner sib	h10c4	661.19	30.799	49.993	Non
Penner sib	h10c4	436.264	30.637	49.721	Non
Penner sib	h10c4	134.578	30.637	49.721	Non
Penner sib	h10c5	527.953	40.418	65.633	Non
Penner sib	h10c5	551.242	43.714	70.982	Non
Penner sib	h10c5	495.819	44.038	71.527	Non
Penner sib	h10c5	423.153	44.038	71.527	Non
Penner sib	h10c5	281.586	44.038	71.527	Non
Penner sib	h11c1	817.399	32.799	53.248	Non
Penner sib	h11c1	833.523	35.068	56.934	Non
Penner sib	h11c1	693.558	35.068	56.934	Non
Penner sib	h11c1	505.019	35.068	56.934	Non
Penner sib	h11c1	243.559	35.068	56.934	Non
Penner sib	h11c2	728.874	41.012	66.609	Non
Penner sib	h11c2	718.261	41.012	66.609	Non
Penner sib	h11c2	696.046	41.714	67.74	Non
Penner sib	h11c2	604.855	41.714	67.74	Non
Penner sib	h11c2	396.616	41.12	66.788	Non
Penner sib	h11c2	258.847	41.12	66.788	Non
Penner sib	h11c3	685.6	42.903	69.678	Non
Penner sib	h11c3	735.388	42.471	68.968	Non
Penner sib	h11c3	879.912	43.768	71.06	Non
Penner sib	h11c3	690.876	43.768	71.06	Non
Penner sib	h11c3	250.286	43.768	71.06	Non
Penner sib	h11c4	1011.179	42.525	69.072	Non
Penner sib	h11c4	939.438	42.525	69.072	Non
Penner sib	h11c4	617.761	42.525	69.072	Non
Penner sib	h11c4	303.345	42.525	69.072	Non
Penner sib	h11c4	126.168	42.525	69.072	Non
Penner sib	h11c5	755.735	50.522	82.068	Non
Penner sib	h11c5	700.834	50.846	82.591	Non
Penner sib	h11c5	608.937	51.332	83.387	Non
Penner sib	h11c5	385.345	51.332	83.387	Non
Penner sib	h11c5	198.439	51.332	83.387	Non
Penner sib	h12c1	360.461	40.742	66.157	Non
Penner sib	h12c1	355.777	40.742	66.157	Non
Penner sib	h12c1	360.062	43.93	71.338	Non
Penner sib	h12c1	386.855	43.444	70.549	Non
Penner sib	h12c1	363.147	44.092	71.607	Non
Penner sib	h12c1	296.223	44.092	71.607	Non
Penner sib	h12c1	208.096	44.092	71.607	Non
Penner sib	h12c1	133.867	44.092	71.607	Non
Penner sib	h12c2	324.131	44.362	72.051	Non
Penner sib	h12c2	402.88	44.308	71.953	Non
Penner sib	h12c2	385.923	44.308	71.953	Non
Penner sib	h12c2	352.718	43.389	70.463	Non
Penner sib	h12c2	345.975	43.389	70.463	Non
Penner sib	h12c2	401.477	45.335	73.64	Non
Penner sib	h12c2	270.966	45.335	73.64	Non
Penner sib	h12c2	186.559	45.335	73.64	Non
Penner sib	h12c3	329.992	40.958	66.51	Non
Penner sib	h12c3	300.96	40.958	66.51	Non
Penner sib	h12c3	338.103	47.442	77.047	Non
Penner sib	h12c3	317.734	47.442	77.047	Non
Penner sib	h12c3	256.906	47.442	77.047	Non
Penner sib	h12c3	193.271	47.226	76.71	Non
Penner sib	h12c3	115.514	47.226	76.71	Non
Penner sib	h12c3	57.955	47.226	76.71	Non
Penner sib	h12c4	390.59	33.663	54.662	Non
Penner sib	h12c4	486.763	29.611	48.055	Non
Penner sib	h12c4	464.064	29.611	48.055	Non
Penner sib	h12c4	429.632	29.611	48.055	Non
Penner sib	h12c4	454.776	31.178	50.608	Non
Penner sib	h12c4	425.433	31.178	50.608	Non
Penner sib	h12c4	352.041	31.286	50.792	Non
Penner sib	h12c4	267.867	31.286	50.792	Non
Penner sib	h12c4	150.424	31.286	50.792	Non
Penner sib	h12c5	335.499	23.235	37.696	Non
Penner sib	h12c5	357.717	29.611	48.062	Non
Penner sib	h12c5	379.561	28.098	45.611	Non
Penner sib	h12c5	494.676	30.799	49.998	Non
Penner sib	h12c5	478.645	30.799	49.998	Non
Penner sib	h12c5	473.34	30.637	49.735	Non
Penner sib	h12c5	321.386	30.637	49.735	Non
Penner sib	h12c5	239.484	30.637	49.735	Non
Penner sib	h12c5	164.262	30.637	49.735	Non
Penner sib	h12c5	127.695	30.637	49.735	Non
Penner sib	h13c1	661.603	36.257	58.879	Non
Penner sib	h13c1	832.076	38.31	62.215	Non
Penner sib	h13c1	833.96	38.797	62.987	Non
Penner sib	h13c1	508.11	38.797	62.987	Non
Penner sib	h13c1	245.967	38.797	62.987	Non
Penner sib	h13c2	538.505	33.501	54.39	Non
Penner sib	h13c2	779.917	35.014	56.843	Non
Penner sib	h13c2	778.115	34.528	56.06	Non
Penner sib	h13c2	634.555	34.528	56.06	Non
Penner sib	h13c2	536.969	34.96	56.753	Non
Penner sib	h13c2	361.572	34.96	56.753	Non
Penner sib	h13c3	548.119	45.119	73.268	Non
Penner sib	h13c3	542.491	48.415	78.635	Non
Penner sib	h13c3	717.682	45.929	74.598	Non
Penner sib	h13c3	719.59	45.119	73.286	Non
Penner sib	h13c3	606.847	45.065	73.193	Non
Penner sib	h13c3	284.458	45.065	73.193	Non
Penner sib	h13c4	416.586	42.255	68.624	Non
Penner sib	h13c4	583.406	45.551	73.992	Non
Penner sib	h13c4	557.784	45.497	73.883	Non
Penner sib	h13c4	499.846	45.227	73.448	Non
Penner sib	h13c4	482.001	44.902	72.928	Non
Penner sib	h13c4	398.305	45.659	74.163	Non
Penner sib	h13c4	367.471	25.936	42.095	Non
Penner sib	h13c5	399.916	45.713	74.247	Non
Penner sib	h13c5	580.788	42.579	69.156	Non
Penner sib	h13c5	605.259	42.579	69.156	Non
Penner sib	h13c5	537.673	44.47	72.218	Non
Penner sib	h13c5	413.475	44.47	72.218	Non
Penner sib	h13c5	259.919	44.47	72.218	Non
Penner sib	h13c5	135.252	44.47	72.218	Non
Penner sib	h13c6	643.008	44.848	72.819	Non
Penner sib	h13c6	729.543	44.74	72.654	Non
Penner sib	h13c6	572.283	44.74	72.654	Non
Penner sib	h13c6	376.267	45.281	73.56	Non
Penner sib	h13c6	223.089	45.281	73.56	Non
Penner sib	h13c6	114.498	45.281	73.56	Non
Penner sib	h14c1	532.233	30.259	49.123	Non
Penner sib	h14c1	516.839	30.259	49.123	Non
Penner sib	h14c1	687.874	34.582	56.149	Non
Penner sib	h14c1	682.358	34.42	55.879	Non
Penner sib	h14c1	579.193	36.149	58.695	Non
Penner sib	h14c1	311.163	36.149	58.695	Non
Penner sib	h14c1	244.472	34.366	55.8	Non
Penner sib	h14c2	549.122	33.879	55.008	Non
Penner sib	h14c2	643.553	33.879	55.008	Non
Penner sib	h14c2	651.464	37.824	61.424	Non
Penner sib	h14c2	637.865	37.824	61.424	Non
Penner sib	h14c2	542.997	37.878	61.505	Non
Penner sib	h14c2	345.153	37.878	61.505	Non
Penner sib	h14c2	261.075	37.878	61.505	Non
Penner sib	h14c3	469.77	44.524	72.318	Non
Penner sib	h14c3	592.948	45.119	73.275	Non
Penner sib	h14c3	670.191	45.173	73.375	Non
Penner sib	h14c3	644.262	45.173	73.375	Non
Penner sib	h14c3	412.926	45.173	73.375	Non
Penner sib	h14c3	144.117	45.173	73.375	Non
Penner sib	h14c3	84.145	45.173	73.375	Non
Penner sib	h14c3	42.623	45.173	73.375	Non
Penner sib	h14c4	516.308	33.231	53.947	Non
Penner sib	h14c4	550.176	33.231	53.947	Non
Penner sib	h14c4	719.744	35.987	58.428	Non
Penner sib	h14c4	522.743	35.987	58.428	Non
Penner sib	h14c4	404.505	35.987	58.428	Non
Penner sib	h14c4	248.716	35.987	58.428	Non
Penner sib	h14c4	104.109	35.987	58.428	Non
Penner sib	h14c5	403.132	32.366	52.548	Non
Penner sib	h14c5	458.747	36.689	59.57	Non
Penner sib	h14c5	511.656	36.851	59.839	Non
Penner sib	h14c5	551.548	35.717	57.995	Non
Penner sib	h14c5	365.316	35.717	57.995	Non
Penner sib	h14c5	257.388	35.717	57.995	Non
Penner sib	h14c5	160.455	35.717	57.995	Non
Penner sib	h15c1	548.275	33.501	54.405	Non
Penner sib	h15c1	571.412	34.582	56.137	Non
Penner sib	h15c1	542.864	34.582	56.137	Non
Penner sib	h15c1	504.262	34.582	56.137	Non
Penner sib	h15c1	477.887	34.582	56.137	Non
Penner sib	h15c1	503.189	36.905	59.923	Non
Penner sib	h15c1	487.59	36.905	59.923	Non
Penner sib	h15c1	464.826	36.905	59.923	Non
Penner sib	h15c1	441.301	36.905	59.923	Non
Penner sib	h15c1	357.268	36.905	59.923	Non
Penner sib	h15c1	254.885	36.905	59.923	Non
Penner sib	h15c1	235.352	36.905	59.923	Non
Penner sib	h15c2	408.856	40.31	65.465	Non
Penner sib	h15c2	531.167	39.823	64.661	Non
Penner sib	h15c2	497.435	39.823	64.661	Non
Penner sib	h15c2	498.94	41.066	66.703	Non
Penner sib	h15c2	483.672	41.066	66.703	Non
Penner sib	h15c2	430.769	41.066	66.703	Non
Penner sib	h15c2	442.872	40.688	66.083	Non
Penner sib	h15c2	401.871	40.688	66.083	Non
Penner sib	h15c2	354.753	40.688	66.083	Non
Penner sib	h15c2	245.678	40.688	66.083	Non
Penner sib	h15c2	150.806	40.688	66.083	Non
Penner sib	h15c2	134.332	40.688	66.083	Non
Penner sib	h15c3	480.583	36.149	58.692	Non
Penner sib	h15c3	569.577	36.203	58.777	Non
Penner sib	h15c3	560.422	36.203	58.777	Non
Penner sib	h15c3	542.987	36.203	58.777	Non
Penner sib	h15c3	567.333	35.555	57.716	Non
Penner sib	h15c3	518.122	34.042	55.272	Non
Penner sib	h15c3	482.535	34.042	55.272	Non
Penner sib	h15c3	440.783	34.042	55.272	Non
Penner sib	h15c3	365.595	34.042	55.272	Non
Penner sib	h15c3	251.389	34.042	55.272	Non
Penner sib	h15c3	156.5	34.042	55.272	Non
Penner sib	h15c3	145.506	34.042	55.272	Non
Penner sib	h16c1	689.186	41.444	67.312	Non
Penner sib	h16c1	939.501	43.444	70.546	Non
Penner sib	h16c1	831.388	45.065	73.202	Non
Penner sib	h16c1	255.937	45.065	73.202	Non
Penner sib	h16c1	57.016	45.065	73.202	Non
Penner sib	h16c2	631.846	40.039	65.005	Non
Penner sib	h16c2	844.735	38.364	62.303	Non
Penner sib	h16c2	640.225	39.499	64.15	Non
Penner sib	h16c2	452.668	39.499	64.15	Non
Penner sib	h16c2	388.424	39.499	64.15	Non
Penner sib	h16c2	329.711	39.499	64.15	Non
Penner sib	h16c2	247.659	39.499	64.15	Non
Penner sib	h16c3	657.45	36.905	59.927	Non
Penner sib	h16c3	756.809	36.527	59.309	Non
Penner sib	h16c3	590.558	38.634	62.728	Non
Penner sib	h16c3	445.759	37.986	61.67	Non
Penner sib	h16c3	366.151	37.986	61.67	Non
Penner sib	h16c3	301.945	37.986	61.67	Non
Penner sib	h16c4	615.042	39.607	64.33	Non
Penner sib	h16c4	769.495	42.525	69.065	Non
Penner sib	h16c4	765.763	43.173	70.119	Non
Penner sib	h16c4	447.028	43.173	70.119	Non
Penner sib	h16c4	309.778	43.173	70.119	Non
Penner sib	h17c1	652.485	44.74	72.663	Non
Penner sib	h17c1	658.125	44.74	72.663	Non
Penner sib	h17c1	518.057	45.821	74.428	Non
Penner sib	h17c1	435.582	46.307	75.224	Non
Penner sib	h17c1	318.595	46.307	75.224	Non
Penner sib	h17c1	256.954	46.307	75.224	Non
Penner sib	h17c1	231.27	46.307	75.224	Non
Penner sib	h17c2	669.288	37.77	61.335	Non
Penner sib	h17c2	625.34	40.85	66.34	Non
Penner sib	h17c2	549.999	40.255	65.37	Non
Penner sib	h17c2	386.239	40.255	65.37	Non
Penner sib	h17c2	320.9	40.201	65.284	Non
Penner sib	h17c2	284.6	40.201	65.284	Non
Penner sib	h17c2	240.464	40.201	65.284	Non
Penner sib	h17c2	159.559	40.201	65.284	Non
Penner sib	h17c2	79.249	40.201	65.284	Non
Penner sib	h17c3	561.002	34.204	55.533	Non
Penner sib	h17c3	505.07	36.203	58.782	Non
Penner sib	h17c3	509.372	37.121	60.276	Non
Penner sib	h17c3	423.536	37.121	60.276	Non
Penner sib	h17c3	311.511	37.121	60.276	Non
Penner sib	h17c3	233.375	37.121	60.276	Non
Penner sib	h17c3	212.203	37.121	60.276	Non
Penner sib	h17c3	176.378	37.121	60.276	Non
Penner sib	h17c3	125.475	37.121	60.276	Non
Penner sib	h17c4	612.886	37.716	61.251	Non
Penner sib	h17c4	595.338	37.5	60.902	Non
Penner sib	h17c4	429.176	36.527	59.309	Non
Penner sib	h17c4	326.351	35.068	56.936	Non
Penner sib	h17c4	257.433	35.068	56.936	Non
Penner sib	h17c4	224.254	35.068	56.936	Non
Penner sib	h17c4	213.536	35.068	56.936	Non
Penner sib	h18c1	405.21	43.011	69.868	Non
Penner sib	h18c1	405.674	43.011	69.868	Non
Penner sib	h18c1	367.571	43.011	69.868	Non
Penner sib	h18c1	322.875	43.011	69.868	Non
Penner sib	h18c1	270.441	43.714	70.995	Non
Penner sib	h18c1	219.648	43.714	70.995	Non
Penner sib	h18c1	187.617	43.714	70.995	Non
Penner sib	h18c1	171.977	43.714	70.995	Non
Penner sib	h18c2	347.74	31.718	51.486	Non
Penner sib	h18c2	371.558	31.718	51.486	Non
Penner sib	h18c2	365.477	31.718	51.486	Non
Penner sib	h18c2	429.595	33.825	54.92	Non
Penner sib	h18c2	399.45	33.825	54.92	Non
Penner sib	h18c2	339.59	33.825	54.92	Non
Penner sib	h18c2	273.809	33.825	54.92	Non
Penner sib	h18c2	219.703	33.825	54.92	Non
Penner sib	h18c2	188.15	33.825	54.92	Non
Penner sib	h18c3	330.403	34.798	56.493	Non
Penner sib	h18c3	367.742	34.798	56.493	Non
Penner sib	h18c3	368.019	34.798	56.493	Non
Penner sib	h18c3	355.732	34.798	56.493	Non
Penner sib	h18c3	325.772	34.798	56.493	Non
Penner sib	h18c3	289.885	34.798	56.493	Non
Penner sib	h18c3	255.236	34.798	56.493	Non
Penner sib	h18c4	346.854	36.851	59.846	Non
Penner sib	h18c4	336.203	36.851	59.846	Non
Penner sib	h18c4	307.148	36.851	59.846	Non
Penner sib	h18c4	258.237	36.851	59.846	Non
Penner sib	h18c4	219.656	36.851	59.846	Non
Penner sib	h18c4	188.643	36.851	59.846	Non
Penner sib	h18c4	158.628	36.851	59.846	Non
Penner sib	h18c4	135.978	36.851	59.846	Non
Penner sib	h18c5	354.822	36.851	59.825	Non
Penner sib	h18c5	344.85	36.851	59.825	Non
Penner sib	h18c5	307.537	36.851	59.825	Non
Penner sib	h18c5	255.519	36.851	59.825	Non
Penner sib	h18c5	211.189	36.851	59.825	Non
Penner sib	h18c5	178.088	36.851	59.825	Non
Penner sib	h18c5	142.717	36.851	59.825	Non
Penner sib	h18c5	122.11	36.851	59.825	Non
Penner sib	h18c5	109.826	36.851	59.825	Non
Penner sib	h18c6	375.568	32.042	52.014	Non
Penner sib	h18c6	384.062	32.042	52.014	Non
Penner sib	h18c6	365.191	32.042	52.014	Non
Penner sib	h18c6	332.019	32.042	52.014	Non
Penner sib	h18c6	293.359	32.042	52.014	Non
Penner sib	h18c6	248.71	32.042	52.014	Non
Penner sib	h18c6	209.11	32.042	52.014	Non
Penner sib	h18c6	180.982	32.042	52.014	Non
Penner sib	h18c6	159.452	32.042	52.014	Non
Penner sib	h19c1	442.568	34.258	55.611	Non
Penner sib	h19c1	469.469	34.258	55.611	Non
Penner sib	h19c1	465.218	34.258	55.611	Non
Penner sib	h19c1	419.647	34.258	55.611	Non
Penner sib	h19c1	370.893	34.258	55.611	Non
Penner sib	h19c1	333.875	34.258	55.611	Non
Penner sib	h19c1	296.341	34.258	55.611	Non
Penner sib	h19c1	253.206	34.258	55.611	Non
Penner sib	h19c1	213.526	34.258	55.611	Non
Penner sib	h19c2	354.613	31.772	51.574	Non
Penner sib	h19c2	379.006	31.772	51.574	Non
Penner sib	h19c2	379.025	34.528	56.049	Non
Penner sib	h19c2	359.623	34.528	56.049	Non
Penner sib	h19c2	336.413	34.528	56.049	Non
Penner sib	h19c2	295.56	34.528	56.049	Non
Penner sib	h19c2	328.651	35.23	57.203	Non
Penner sib	h19c2	289.747	35.23	57.203	Non
Penner sib	h19c2	245.443	35.23	57.203	Non
Penner sib	h19c2	196.452	35.23	57.203	Non
Penner sib	h19c2	159.523	35.23	57.203	Non
Penner sib	h19c3	352.023	38.472	62.458	Non
Penner sib	h19c3	345.052	38.472	62.458	Non
Penner sib	h19c3	317.664	38.472	62.458	Non
Penner sib	h19c3	345.836	36.959	60.03	Non
Penner sib	h19c3	322.149	36.959	60.03	Non
Penner sib	h19c3	293.461	36.959	60.03	Non
Penner sib	h19c3	284.717	39.931	64.85	Non
Penner sib	h19c3	254.015	39.931	64.85	Non
Penner sib	h19c3	231.956	39.931	64.85	Non
Penner sib	h19c3	208.835	39.931	64.85	Non
Penner sib	h19c3	187.372	39.931	64.85	Non
Penner sib	h19c3	169.728	39.931	64.85	Non
Penner sib	h19c4	342.96	42.471	68.967	Non
Penner sib	h19c4	354.624	42.471	68.967	Non
Penner sib	h19c4	348.318	42.471	68.967	Non
Penner sib	h19c4	332.298	42.471	68.967	Non
Penner sib	h19c4	292.86	42.471	68.967	Non
Penner sib	h19c4	243.811	42.471	68.967	Non
Penner sib	h19c4	211.219	42.471	68.967	Non
Penner sib	h19c4	184.955	42.471	68.967	Non
Penner sib	h19c4	161.156	42.471	68.967	Non
Penner sib	h19c4	145.531	42.471	68.967	Non
Penner sib	h19c4	139.201	42.471	68.967	Non
Penner sib	h20c1	269.677	35.122	57.022	Non
Penner sib	h20c1	245.769	35.122	57.022	Non
Penner sib	h20c1	223.039	35.122	57.022	Non
Penner sib	h20c1	194.326	35.122	57.022	Non
Penner sib	h20c1	176.337	36.365	59.051	Non
Penner sib	h20c1	158.402	36.365	59.051	Non
Penner sib	h20c1	143.566	36.365	59.051	Non
Penner sib	h20c1	129.156	36.365	59.051	Non
Penner sib	h20c2	227.342	40.039	65.012	Non
Penner sib	h20c2	215.333	40.039	65.012	Non
Penner sib	h20c2	197.639	40.039	65.012	Non
Penner sib	h20c2	177.525	40.039	65.012	Non
Penner sib	h20c2	161.415	40.039	65.012	Non
Penner sib	h20c2	170.422	36.365	59.043	Non
Penner sib	h20c2	158.98	36.365	59.043	Non
Penner sib	h20c2	144.825	36.365	59.043	Non
Penner sib	h20c2	132.645	36.365	59.043	Non
Penner sib	h20c2	123.582	36.365	59.043	Non
Penner sib	h20c3	247.415	31.34	50.876	Non
Penner sib	h20c3	247.003	31.34	50.876	Non
Penner sib	h20c3	239.657	31.34	50.876	Non
Penner sib	h20c3	224.527	31.34	50.876	Non
Penner sib	h20c3	204.106	31.34	50.876	Non
Penner sib	h20c3	177.267	31.34	50.876	Non
Penner sib	h20c3	152.467	31.34	50.876	Non
Penner sib	h20c3	136.314	31.34	50.876	Non
Penner sib	h20c4	284.007	35.068	56.941	Non
Penner sib	h20c4	281.042	35.068	56.941	Non
Penner sib	h20c4	279.473	35.068	56.941	Non
Penner sib	h20c4	282.1	35.068	56.941	Non
Penner sib	h20c4	276.566	35.068	56.941	Non
Penner sib	h20c4	274.938	38.526	62.554	Non
Penner sib	h20c4	263.285	38.526	62.554	Non
Penner sib	h20c4	242.208	38.526	62.554	Non
Penner sib	h20c4	222.236	38.526	62.554	Non
Penner sib	h20c4	198.576	38.526	62.554	Non
Penner sib	h20c4	169.336	38.526	62.554	Non
Penner sib	h20c4	148.262	38.526	62.554	Non
Penner sib	h20c4	135.259	38.526	62.554	Non
Penner sib	h20c5	243.545	37.824	61.423	Non
Penner sib	h20c5	242.008	37.824	61.423	Non
Penner sib	h20c5	231.763	37.824	61.423	Non
Penner sib	h20c5	222.634	38.04	61.779	Non
Penner sib	h20c5	198.98	38.04	61.779	Non
Penner sib	h20c5	181.876	38.04	61.779	Non
Penner sib	h20c5	163.549	38.04	61.779	Non
Penner sib	h20c5	147.989	38.04	61.779	Non
Penner sib	h20c5	146.026	39.067	63.436	Non
Penner sib	h20c5	134.397	39.067	63.436	Non
Penner sib	h20c6	240.55	39.553	64.228	Non
Penner sib	h20c6	238.965	39.553	64.228	Non
Penner sib	h20c6	223.942	39.553	64.228	Non
Penner sib	h20c6	209.567	39.499	64.141	Non
Penner sib	h20c6	181.571	39.499	64.141	Non
Penner sib	h20c6	162.752	39.499	64.141	Non
Penner sib	h20c6	152.303	39.499	64.141	Non
Penner sib	h20c6	141.693	39.499	64.141	Non
Penner sib	h20c6	131.428	39.499	64.141	Non
Penner sib	h20c6	121.639	39.499	64.141	Non
Penner sib	h20c6	113.21	39.499	64.141	Non
Penner sib	h21c1	377.803	35.176	57.114	Non
Penner sib	h21c1	387.812	35.176	57.114	Non
Penner sib	h21c1	388.196	35.176	57.114	Non
Penner sib	h21c1	376.666	35.176	57.114	Non
Penner sib	h21c1	371.554	35.176	57.092	Non
Penner sib	h21c1	306.018	35.176	57.092	Non
Penner sib	h21c1	244.281	35.176	57.092	Non
Penner sib	h21c1	202.919	35.176	57.092	Non
Penner sib	h21c1	173.001	35.176	57.092	Non
Penner sib	h21c1	157.226	35.176	57.092	Non
Penner sib	h21c2	332.662	36.527	59.305	Non
Penner sib	h21c2	368.4	36.527	59.305	Non
Penner sib	h21c2	375.533	36.527	59.305	Non
Penner sib	h21c2	379.629	36.527	59.305	Non
Penner sib	h21c2	400.617	36.203	58.786	Non
Penner sib	h21c2	351.502	36.203	58.786	Non
Penner sib	h21c2	339.988	38.688	62.829	Non
Penner sib	h21c2	306.283	38.688	62.829	Non
Penner sib	h21c2	266.263	38.688	62.829	Non
Penner sib	h21c2	227.628	38.688	62.829	Non
Penner sib	h21c2	196.963	38.688	62.829	Non
Penner sib	h21c2	178.567	38.688	62.829	Non
Penner sib	h21c2	159.75	38.688	62.829	Non
Penner sib	h21c3	325.322	48.036	78.027	Non
Penner sib	h21c3	335.444	48.036	78.027	Non
Penner sib	h21c3	323.082	48.036	78.027	Non
Penner sib	h21c3	337.517	46.253	75.13	Non
Penner sib	h21c3	296.486	46.253	75.13	Non
Penner sib	h21c3	244.131	46.253	75.13	Non
Penner sib	h21c3	210.431	46.253	75.13	Non
Penner sib	h21c3	191.335	46.253	75.13	Non
Penner sib	h21c3	170.796	46.253	75.13	Non
Penner sib	h21c4	254.371	42.633	69.233	Non
Penner sib	h21c4	237.269	42.633	69.233	Non
Penner sib	h21c4	208.459	42.633	69.233	Non
Penner sib	h21c4	182.322	44.362	72.045	Non
Penner sib	h21c4	166.587	44.362	72.045	Non
Penner sib	h21c4	158.3	44.362	72.045	Non
Penner sib	h21c4	148.788	44.362	72.045	Non
Penner sib	h21c5	328.508	36.095	58.606	Non
Penner sib	h21c5	346.526	36.095	58.606	Non
Penner sib	h21c5	344.804	36.095	58.606	Non
Penner sib	h21c5	364.848	38.634	62.748	Non
Penner sib	h21c5	341.874	38.634	62.748	Non
Penner sib	h21c5	302.21	38.634	62.748	Non
Penner sib	h21c5	249.401	38.634	62.748	Non
Penner sib	h21c5	187.896	38.634	62.748	Non
Penner sib	h21c5	150.753	38.634	62.748	Non
Penner sib	h21c5	131.599	38.634	62.748	Non
Penner sib	h21c6	287.524	40.85	66.336	Non
Penner sib	h21c6	303.857	40.85	66.336	Non
Penner sib	h21c6	402.986	38.743	62.915	Non
Penner sib	h21c6	412.146	38.743	62.915	Non
Penner sib	h21c6	406.14	38.743	62.915	Non
Penner sib	h21c6	369.557	38.743	62.915	Non
Penner sib	h21c6	345.28	38.094	61.873	Non
Penner sib	h21c6	294.988	38.094	61.873	Non
Penner sib	h21c6	238.329	38.094	61.873	Non
Penner sib	h21c6	191.554	38.094	61.873	Non
Penner sib	h21c6	174.046	38.094	61.873	Non
Penner sib	h22c1	290.661	40.904	66.424	Non
Penner sib	h22c1	307.343	40.904	66.424	Non
Penner sib	h22c1	304.785	40.904	66.424	Non
Penner sib	h22c1	320.198	41.985	68.199	Non
Penner sib	h22c1	291.561	41.985	68.199	Non
Penner sib	h22c1	256.497	41.985	68.199	Non
Penner sib	h22c1	214.006	41.985	68.199	Non
Penner sib	h22c1	174.063	41.985	68.199	Non
Penner sib	h22c1	145.448	41.985	68.199	Non
Penner sib	h22c1	132.14	41.985	68.199	Non
Penner sib	h22c1	122.159	41.985	68.199	Non
Penner sib	h22c2	228.368	30.529	49.557	Non
Penner sib	h22c2	227.372	30.529	49.557	Non
Penner sib	h22c2	219.423	30.529	49.557	Non
Penner sib	h22c2	206.055	30.529	49.557	Non
Penner sib	h22c2	243.442	33.447	54.302	Non
Penner sib	h22c2	218.474	33.447	54.302	Non
Penner sib	h22c2	185.579	33.447	54.302	Non
Penner sib	h22c2	152.38	33.447	54.302	Non
Penner sib	h22c3	252.252	35.176	57.109	Non
Penner sib	h22c3	245.981	35.176	57.109	Non
Penner sib	h22c3	222.447	35.176	57.109	Non
Penner sib	h22c3	225.393	41.498	67.385	Non
Penner sib	h22c3	219.512	41.498	67.385	Non
Penner sib	h22c3	201.37	41.498	67.385	Non
Penner sib	h22c3	177.039	41.498	67.385	Non
Penner sib	h22c3	158.023	41.498	67.385	Non
Penner sib	h22c3	145.961	41.498	67.385	Non
Penner sib	h22c4	250.475	37.392	60.722	Non
Penner sib	h22c4	262.09	37.392	60.722	Non
Penner sib	h22c4	252.531	37.392	60.722	Non
Penner sib	h22c4	245.174	39.931	64.846	Non
Penner sib	h22c4	234.324	39.931	64.846	Non
Penner sib	h22c4	216.385	39.931	64.846	Non
Penner sib	h22c4	192.856	39.931	64.846	Non
Penner sib	h22c4	169.979	39.931	64.846	Non
Penner sib	h22c4	158.009	39.931	64.846	Non
Penner sib	h22c4	145.431	39.931	64.846	Non
Penner sib	h22c5	254.823	38.688	62.83	Non
Penner sib	h22c5	234.865	38.688	62.83	Non
Penner sib	h22c5	208.294	38.688	62.83	Non
Penner sib	h22c5	184.474	38.688	62.83	Non
Penner sib	h22c5	160.177	38.688	62.83	Non
Penner sib	h22c5	140.566	38.688	62.83	Non
Penner sib	h22c5	129.842	38.688	62.83	Non
Penner sib	h22c6	251.343	33.933	55.088	Non
Penner sib	h22c6	259.437	33.933	55.088	Non
Penner sib	h22c6	258.022	33.933	55.088	Non
Penner sib	h22c6	255.127	38.04	61.763	Non
Penner sib	h22c6	252.15	38.04	61.763	Non
Penner sib	h22c6	237.472	38.04	61.763	Non
Penner sib	h22c6	223.94	37.662	61.168	Non
Penner sib	h22c6	200.555	37.662	61.168	Non
Penner sib	h22c6	173.2	37.662	61.168	Non
Penner sib	h22c6	147.281	37.662	61.168	Non
Penner sib	h22c6	133.394	37.662	61.168	Non
Penner sib	h23c1	271.716	38.58	62.649	Non
Penner sib	h23c1	214.993	38.58	62.649	Non
Penner sib	h23c1	183.484	38.58	62.649	Non
Penner sib	h23c1	165.131	38.58	62.649	Non
Penner sib	h23c1	151.751	38.58	62.649	Non
Penner sib	h23c2	282.255	39.769	64.59	Non
Penner sib	h23c2	281.72	39.769	64.59	Non
Penner sib	h23c2	256.221	39.769	64.59	Non
Penner sib	h23c2	200.613	39.823	64.671	Non
Penner sib	h23c2	186.388	39.823	64.671	Non
Penner sib	h23c2	174.981	39.823	64.671	Non
Penner sib	h23c2	160.062	39.823	64.671	Non
Penner sib	h23c3	266.347	37.608	61.07	Non
Penner sib	h23c3	288.842	37.608	61.07	Non
Penner sib	h23c3	288.241	37.608	61.07	Non
Penner sib	h23c3	265.422	37.608	61.07	Non
Penner sib	h23c3	238.841	37.608	61.07	Non
Penner sib	h23c3	208.365	37.608	61.07	Non
Penner sib	h23c3	180.4	37.608	61.07	Non
Penner sib	h23c4	253.773	31.664	51.397	Non
Penner sib	h23c4	253.758	31.664	51.397	Non
Penner sib	h23c4	246.457	31.664	51.397	Non
Penner sib	h23c4	220.024	35.068	56.92	Non
Penner sib	h23c4	205.777	35.068	56.92	Non
Penner sib	h23c4	183.722	35.068	56.92	Non
Penner sib	h23c4	169.339	35.068	56.92	Non
Penner sib	h23c4	157.063	35.068	56.92	Non
Penner sib	h23c5	249.931	28.746	46.654	Non
Penner sib	h23c5	244.233	28.746	46.654	Non
Penner sib	h23c5	228.816	28.746	46.654	Non
Penner sib	h23c5	240.12	31.934	51.84	Non
Penner sib	h23c5	213.927	31.934	51.84	Non
Penner sib	h23c5	179.146	31.934	51.84	Non
Penner sib	h23c5	151.214	31.934	51.84	Non
Penner sib	h23c5	127.82	31.934	51.84	Non
Penner sib	h23c6	246.067	31.448	51.042	Non
Penner sib	h23c6	245.344	31.448	51.042	Non
Penner sib	h23c6	231.347	31.448	51.042	Non
Penner sib	h23c6	197.967	39.391	63.944	Non
Penner sib	h23c6	193.56	39.391	63.944	Non
Penner sib	h23c6	175.86	39.391	63.944	Non
Penner sib	h23c6	153.385	39.391	63.944	Non
Penner sib	h23c6	132.965	39.391	63.944	Non
Penner sib	h23c6	121.171	39.391	63.944	Non
Penner sib	h24c1	269.846	40.85	66.349	Non
Penner sib	h24c1	266.446	40.85	66.349	Non
Penner sib	h24c1	237.915	40.85	66.349	Non
Penner sib	h24c1	201.02	40.85	66.349	Non
Penner sib	h24c1	194.478	41.444	67.299	Non
Penner sib	h24c1	173.266	41.444	67.299	Non
Penner sib	h24c1	150.013	41.444	67.299	Non
Penner sib	h24c1	128.806	41.444	67.299	Non
Penner sib	h24c1	114.543	41.444	67.299	Non
Penner sib	h24c2	202.268	38.743	62.913	Non
Penner sib	h24c2	216.634	38.743	62.913	Non
Penner sib	h24c2	210.535	42.093	68.357	Non
Penner sib	h24c2	215.065	42.093	68.357	Non
Penner sib	h24c2	214.389	42.093	68.357	Non
Penner sib	h24c2	251.231	44.524	72.327	Non
Penner sib	h24c2	241.378	44.524	72.327	Non
Penner sib	h24c2	213.187	44.524	72.327	Non
Penner sib	h24c2	178.677	44.524	72.327	Non
Penner sib	h24c2	153.416	44.524	72.327	Non
Penner sib	h24c2	136.553	44.524	72.327	Non
Penner sib	h24c2	125.972	44.524	72.327	Non
Penner sib	h24c3	227.034	40.039	65.005	Non
Penner sib	h24c3	225.759	40.039	65.005	Non
Penner sib	h24c3	215.355	40.039	65.005	Non
Penner sib	h24c3	226.288	44.632	72.491	Non
Penner sib	h24c3	205.039	44.632	72.491	Non
Penner sib	h24c3	181.489	44.632	72.491	Non
Penner sib	h24c3	160.066	44.632	72.491	Non
Penner sib	h24c3	140.01	44.632	72.491	Non
Penner sib	h24c3	127.929	44.632	72.491	Non
Penner sib	h24c4	218.089	42.471	68.971	Non
Penner sib	h24c4	216.309	42.471	68.971	Non
Penner sib	h24c4	210.346	42.471	68.971	Non
Penner sib	h24c4	198.355	42.471	68.971	Non
Penner sib	h24c4	177.64	42.471	68.971	Non
Penner sib	h24c4	158.044	42.471	68.971	Non
Penner sib	h24c4	145.212	42.471	68.971	Non
Penner sib	h24c4	132.168	42.471	68.971	Non
Penner sib	h24c4	121.838	42.471	68.971	Non
Penner sib	h25c1	326.728	35.338	57.379	Non
Penner sib	h25c1	351.597	35.338	57.379	Non
Penner sib	h25c1	358.143	35.338	57.379	Non
Penner sib	h25c1	349.061	35.338	57.379	Non
Penner sib	h25c1	325.54	37.662	61.161	Non
Penner sib	h25c1	273.387	37.662	61.161	Non
Penner sib	h25c1	229.025	37.662	61.161	Non
Penner sib	h25c1	204.604	37.662	61.161	Non
Penner sib	h25c1	182.902	37.662	61.161	Non
Penner sib	h25c2	342.865	33.069	53.687	Non
Penner sib	h25c2	343.807	33.069	53.687	Non
Penner sib	h25c2	321.652	33.069	53.687	Non
Penner sib	h25c2	353.48	32.366	52.535	Non
Penner sib	h25c2	341.329	32.366	52.535	Non
Penner sib	h25c2	300.621	32.366	52.535	Non
Penner sib	h25c2	257.676	32.366	52.535	Non
Penner sib	h25c2	224.637	32.366	52.535	Non
Penner sib	h25c2	201.12	32.366	52.535	Non
Penner sib	h25c3	275.078	34.15	55.446	Non
Penner sib	h25c3	293.7	34.15	55.446	Non
Penner sib	h25c3	289.587	36.905	59.93	Non
Penner sib	h25c3	277.092	36.905	59.93	Non
Penner sib	h25c3	277.304	36.689	59.564	Non
Penner sib	h25c3	245.135	36.689	59.564	Non
Penner sib	h25c3	214.997	36.689	59.564	Non
Penner sib	h25c3	193.489	36.689	59.564	Non
Penner sib	h25c3	175.799	36.689	59.564	Non
Penner sib	h25c4	303.961	34.42	55.885	Non
Penner sib	h25c4	292.031	34.42	55.885	Non
Penner sib	h25c4	274.324	34.42	55.885	Non
Penner sib	h25c4	246.532	34.42	55.885	Non
Penner sib	h25c4	196.9	37.284	60.539	Non
Penner sib	h25c4	168.793	37.284	60.539	Non
Penner sib	h25c4	147.62	37.284	60.539	Non
Penner sib	h25c4	129.364	37.284	60.539	Non
Penner sib	h25c4	113.772	37.284	60.539	Non
Penner sib	h25c4	106.352	37.284	60.539	Non
Penner sib	h25c5	285.896	36.905	59.92	Non
Penner sib	h25c5	302.635	36.905	59.92	Non
Penner sib	h25c5	272.196	38.634	62.747	Non
Penner sib	h25c5	268.786	38.634	62.747	Non
Penner sib	h25c5	252.142	38.634	62.747	Non
Penner sib	h25c5	220.592	38.634	62.747	Non
Penner sib	h25c5	187.206	38.634	62.747	Non
Penner sib	h25c5	165.025	38.634	62.747	Non
Penner sib	h25c5	144.001	38.634	62.747	Non
Penner sib	h25c5	124.12	38.634	62.747	Non
Penner sib	h25c6	238.708	35.392	57.464	Non
Penner sib	h25c6	252.463	35.392	57.464	Non
Penner sib	h25c6	252.89	35.392	57.464	Non
Penner sib	h25c6	254.139	34.906	56.686	Non
Penner sib	h25c6	232.749	34.906	56.686	Non
Penner sib	h25c6	202.313	34.906	56.686	Non
Penner sib	h25c6	180.036	34.906	56.686	Non
Penner sib	h25c6	161.845	34.906	56.686	Non
Penner sib	h26c1	236.379	37.824	61.416	Non
Penner sib	h26c1	258.279	37.824	61.416	Non
Penner sib	h26c1	261.035	37.824	61.416	Non
Penner sib	h26c1	271.847	38.851	63.078	Non
Penner sib	h26c1	262.997	38.851	63.078	Non
Penner sib	h26c1	251.27	38.851	63.078	Non
Penner sib	h26c1	240.365	38.851	63.078	Non
Penner sib	h26c1	222.381	38.851	63.078	Non
Penner sib	h26c1	209.717	38.851	63.078	Non
Penner sib	h26c2	264.611	36.797	59.754	Non
Penner sib	h26c2	279.838	36.797	59.754	Non
Penner sib	h26c2	283.89	36.797	59.754	Non
Penner sib	h26c2	279.844	36.797	59.754	Non
Penner sib	h26c2	265.292	36.797	59.754	Non
Penner sib	h26c2	233.668	36.797	59.754	Non
Penner sib	h26c2	208.678	42.525	69.066	Non
Penner sib	h26c2	185.974	42.525	69.066	Non
Penner sib	h26c2	161.428	42.525	69.066	Non
Penner sib	h26c2	150.298	42.525	69.066	Non
Penner sib	h26c2	141.888	42.525	69.066	Non
Penner sib	h26c3	275.423	39.013	63.354	Non
Penner sib	h26c3	278.284	39.013	63.354	Non
Penner sib	h26c3	273.238	39.013	63.354	Non
Penner sib	h26c3	263.327	39.013	63.354	Non
Penner sib	h26c3	242.042	39.013	63.354	Non
Penner sib	h26c3	192.52	39.013	63.354	Non
Penner sib	h26c3	164.855	39.013	63.354	Non
Penner sib	h26c3	141.456	39.013	63.354	Non
Penner sib	h26c4	249.662	42.417	68.884	Non
Penner sib	h26c4	265.4	42.417	68.884	Non
Penner sib	h26c4	266.297	42.417	68.884	Non
Penner sib	h26c4	253.597	42.417	68.884	Non
Penner sib	h26c4	237.951	42.417	68.884	Non
Penner sib	h26c4	219.499	42.417	68.884	Non
Penner sib	h26c4	199.537	42.417	68.884	Non
Penner sib	h26c4	174.142	42.417	68.884	Non
Penner sib	h26c4	162.757	42.417	68.884	Non
Penner sib	h26c4	152.879	42.417	68.884	Non
Penner sib	h26c5	300.417	35.068	56.935	Non
Penner sib	h26c5	306.36	35.068	56.935	Non
Penner sib	h26c5	296.917	35.068	56.935	Non
Penner sib	h26c5	277.414	35.068	56.935	Non
Penner sib	h26c5	258.973	35.068	56.935	Non
Penner sib	h26c5	230.209	35.068	56.935	Non
Penner sib	h26c5	200.222	35.068	56.935	Non
Penner sib	h26c5	185.905	35.068	56.935	Non
Penner sib	h26c5	173.343	35.068	56.935	Non
Penner sib	h26c5	161.718	35.068	56.935	Non
Penner sib	h3c1	882.047	39.782	61.026	Non
Penner sib	h3c1	901.282	39.782	61.026	Non
Penner sib	h3c1	817.168	39.782	61.026	Non
Penner sib	h3c1	888.481	40.024	61.384	Non
Penner sib	h3c1	665.077	40.024	61.384	Non
Penner sib	h3c1	409.905	40.024	61.384	Non
Penner sib	h3c1	239.614	40.024	61.384	Non
Penner sib	h3c1	148.394	40.024	61.384	Non
Penner sib	h3c1	97.8	40.024	61.384	Non
Penner sib	h3c1	72.916	40.024	61.384	Non
Penner sib	h3c2	891.779	38.571	59.146	Non
Penner sib	h3c2	1152.495	37.784	57.942	Non
Penner sib	h3c2	1312.553	40.327	61.859	Non
Penner sib	h3c2	1366.669	40.327	61.859	Non
Penner sib	h3c2	1307.578	40.327	61.859	Non
Penner sib	h3c2	1118.7	40.327	61.859	Non
Penner sib	h3c2	1253.098	41.053	62.97	Non
Penner sib	h3c2	925.839	41.053	62.97	Non
Penner sib	h3c2	578.783	41.053	62.97	Non
Penner sib	h3c2	337.002	41.053	62.97	Non
Penner sib	h3c2	215.135	41.053	62.97	Non
Penner sib	h3c2	155.418	41.053	62.97	Non
Penner sib	h3c2	93.278	41.053	62.97	Non
Penner sib	h3c3	1018.003	38.995	59.815	Non
Penner sib	h3c3	1284.11	38.995	59.815	Non
Penner sib	h3c3	1160.053	42.083	64.55	Non
Penner sib	h3c3	1245.996	42.083	64.55	Non
Penner sib	h3c3	1244.659	42.083	64.55	Non
Penner sib	h3c3	1028.969	42.083	64.55	Non
Penner sib	h3c3	666.043	42.083	64.55	Non
Penner sib	h3c3	378.447	42.083	64.55	Non
Penner sib	h3c3	240.253	42.083	64.55	Non
Penner sib	h3c3	165	42.083	64.55	Non
Penner sib	h3c3	104.897	42.083	64.55	Non
Penner sib	h3c4	731.109	49.167	75.427	Non
Penner sib	h3c4	946.997	48.864	74.964	Non
Penner sib	h3c4	1032.236	48.864	74.964	Non
Penner sib	h3c4	1046.02	48.864	74.964	Non
Penner sib	h3c4	1242.078	47.411	72.729	Non
Penner sib	h3c4	1171.419	47.411	72.729	Non
Penner sib	h3c4	1000.157	47.108	72.273	Non
Penner sib	h3c4	643.934	47.108	72.273	Non
Penner sib	h3c4	411.085	47.108	72.273	Non
Penner sib	h3c4	286.38	47.108	72.273	Non
Penner sib	h3c4	201.117	47.108	72.273	Non
Penner sib	h3c4	152.13	47.108	72.273	Non
Penner sib	h3c5	1091.795	48.441	74.328	Non
Penner sib	h3c5	1291.223	51.226	78.593	Non
Penner sib	h3c5	1350.117	51.226	78.593	Non
Penner sib	h3c5	1536.826	48.804	74.886	Non
Penner sib	h3c5	1482.692	48.986	75.152	Non
Penner sib	h3c5	1181.665	48.986	75.152	Non
Penner sib	h3c5	729.426	48.986	75.152	Non
Penner sib	h3c5	417.332	48.986	75.152	Non
Penner sib	h3c5	282.027	48.986	75.152	Non
Penner sib	h3c5	196.608	48.986	75.152	Non
Penner sib	h3c6	830.138	42.688	65.489	Non
Penner sib	h3c6	1101.65	42.628	65.39	Non
Penner sib	h3c6	1147.91	42.628	65.39	Non
Penner sib	h3c6	1144.271	44.626	68.454	Non
Penner sib	h3c6	1233.808	45.171	69.298	Non
Penner sib	h3c6	1052.595	45.171	69.298	Non
Penner sib	h3c6	731.593	45.171	69.298	Non
Penner sib	h3c6	461.929	45.171	69.298	Non
Penner sib	h3c6	307.005	45.171	69.298	Non
Penner sib	h3c6	237.198	45.171	69.298	Non
Penner sib	h3c6	165.731	45.171	69.298	Non
Penner sib	h4c1	746.946	48.683	74.682	Non
Penner sib	h4c1	849.634	48.925	75.08	Non
Penner sib	h4c1	1100.714	51.347	78.77	Non
Penner sib	h4c1	925.761	51.347	78.77	Non
Penner sib	h4c1	650.251	51.347	78.77	Non
Penner sib	h4c1	413.888	51.347	78.77	Non
Penner sib	h4c1	274.707	51.347	78.77	Non
Penner sib	h4c1	178.015	51.347	78.77	Non
Penner sib	h4c1	117.197	51.347	78.77	Non
Penner sib	h4c1	71.591	51.347	78.77	Non
Penner sib	h4c2	593.077	41.053	62.968	Non
Penner sib	h4c2	658.578	41.053	62.968	Non
Penner sib	h4c2	749.925	41.053	62.968	Non
Penner sib	h4c2	884.256	40.327	61.861	Non
Penner sib	h4c2	784.612	40.327	61.861	Non
Penner sib	h4c2	576.999	40.327	61.861	Non
Penner sib	h4c2	381.447	40.327	61.861	Non
Penner sib	h4c2	241.717	40.327	61.861	Non
Penner sib	h4c2	168.923	40.327	61.861	Non
Penner sib	h4c2	113.08	40.327	61.861	Non
Penner sib	h4c3	785.728	50.378	77.29	Non
Penner sib	h4c3	898.948	50.378	77.29	Non
Penner sib	h4c3	1071.618	51.831	79.528	Non
Penner sib	h4c3	973.863	51.831	79.528	Non
Penner sib	h4c3	823.551	51.831	79.528	Non
Penner sib	h4c3	672.849	51.831	79.528	Non
Penner sib	h4c3	519.889	51.831	79.528	Non
Penner sib	h4c3	383.235	51.831	79.528	Non
Penner sib	h4c3	254.561	51.831	79.528	Non
Penner sib	h4c3	161.452	51.831	79.528	Non
Penner sib	h4c4	897.848	38.813	59.53	Non
Penner sib	h4c4	1071.342	38.813	59.53	Non
Penner sib	h4c4	1132.676	38.813	59.53	Non
Penner sib	h4c4	986.881	38.813	59.53	Non
Penner sib	h4c4	763.693	38.752	59.433	Non
Penner sib	h4c4	478.734	38.752	59.433	Non
Penner sib	h4c4	311.036	38.752	59.433	Non
Penner sib	h4c4	203.595	38.752	59.433	Non
Penner sib	h4c4	126.651	38.752	59.433	Non
Penner sib	h4c4	77.345	38.752	59.433	Non
Penner sib	h5c1	748.402	48.986	75.153	Non
Penner sib	h5c1	834.01	45.171	69.296	Non
Penner sib	h5c1	757.107	45.171	69.296	Non
Penner sib	h5c1	698.133	42.507	65.204	Non
Penner sib	h5c1	583.432	42.507	65.204	Non
Penner sib	h5c1	413.115	42.507	65.204	Non
Penner sib	h5c1	235.24	42.507	65.204	Non
Penner sib	h5c1	124.06	42.507	65.204	Non
Penner sib	h5c1	89.176	42.507	65.204	Non
Penner sib	h5c2	596.6	53.103	81.49	Non
Penner sib	h5c2	666.443	53.103	81.49	Non
Penner sib	h5c2	831.461	51.953	79.715	Non
Penner sib	h5c2	745.567	52.498	80.542	Non
Penner sib	h5c2	636.729	52.498	80.542	Non
Penner sib	h5c2	544.443	52.498	80.542	Non
Penner sib	h5c2	453.542	52.498	80.542	Non
Penner sib	h5c2	332.376	52.498	80.542	Non
Penner sib	h5c2	187.596	52.498	80.542	Non
Penner sib	h5c2	130.31	52.498	80.542	Non
Penner sib	h5c3	743.26	41.962	64.362	Non
Penner sib	h5c3	902.904	41.962	64.362	Non
Penner sib	h5c3	956.511	41.962	64.362	Non
Penner sib	h5c3	899.878	41.962	64.362	Non
Penner sib	h5c3	822.441	41.962	64.362	Non
Penner sib	h5c3	724.938	41.962	64.362	Non
Penner sib	h5c3	535.433	41.962	64.362	Non
Penner sib	h5c3	305.417	41.962	64.362	Non
Penner sib	h5c3	221.259	41.962	64.362	Non
Penner sib	h5c4	775.647	47.23	72.448	Non
Penner sib	h5c4	936.585	50.136	76.935	Non
Penner sib	h5c4	980.847	50.136	76.935	Non
Penner sib	h5c4	830.506	50.136	76.935	Non
Penner sib	h5c4	700.551	50.318	77.188	Non
Penner sib	h5c4	551.301	50.318	77.188	Non
Penner sib	h5c4	393.397	50.318	77.188	Non
Penner sib	h5c4	205.604	50.318	77.188	Non
Penner sib	h5c4	89.513	50.318	77.188	Non
Penner sib	h5c5	819.195	38.026	58.32	Non
Penner sib	h5c5	968.75	37.663	57.766	Non
Penner sib	h5c5	1020.581	37.663	57.766	Non
Penner sib	h5c5	925.525	37.663	57.766	Non
Penner sib	h5c5	729.463	37.663	57.766	Non
Penner sib	h5c5	560.618	37.663	57.766	Non
Penner sib	h5c5	401.021	37.663	57.766	Non
Penner sib	h5c5	235.643	37.663	57.766	Non
Penner sib	h5c5	112.409	37.663	57.766	Non
Penner sib	h5c5	78.98	37.663	57.766	Non
Penner sib	h5c6	802.549	43.657	66.967	Non
Penner sib	h5c6	901.017	45.05	69.104	Non
Penner sib	h5c6	1014.652	44.808	68.743	Non
Penner sib	h5c6	902.093	44.808	68.743	Non
Penner sib	h5c6	748.846	44.808	68.743	Non
Penner sib	h5c6	626.617	44.808	68.743	Non
Penner sib	h5c6	469.377	44.808	68.743	Non
Penner sib	h5c6	288.43	44.808	68.743	Non
Penner sib	h5c6	165.289	44.808	68.743	Non
Penner sib	h5c6	126.107	44.808	68.743	Non
Penner sib	h6c1	663.843	37.784	57.958	Non
Penner sib	h6c1	990.433	38.995	59.816	Non
Penner sib	h6c1	1174.99	38.995	59.816	Non
Penner sib	h6c1	1146.723	38.995	59.816	Non
Penner sib	h6c1	1085.132	38.995	59.816	Non
Penner sib	h6c1	827.692	38.995	59.816	Non
Penner sib	h6c1	647.824	38.995	59.816	Non
Penner sib	h6c1	486.218	38.995	59.816	Non
Penner sib	h6c1	315.89	38.995	59.816	Non
Penner sib	h6c1	214.636	38.995	59.816	Non
Penner sib	h6c2	893.539	47.532	72.926	Non
Penner sib	h6c2	1047.694	47.532	72.926	Non
Penner sib	h6c2	1199.465	51.892	79.625	Non
Penner sib	h6c2	1122.752	47.29	72.555	Non
Penner sib	h6c2	1128.117	47.29	72.555	Non
Penner sib	h6c2	1015.369	47.29	72.555	Non
Penner sib	h6c2	812.029	47.29	72.555	Non
Penner sib	h6c2	623.239	47.29	72.555	Non
Penner sib	h6c2	433.818	47.29	72.555	Non
Penner sib	h6c2	277.307	47.29	72.555	Non
Penner sib	h6c2	180.342	47.29	72.555	Non
Penner sib	h6c2	114.643	47.29	72.555	Non
Penner sib	h6c3	910.625	41.598	63.81	Non
Penner sib	h6c3	1169.145	41.598	63.81	Non
Penner sib	h6c3	1297.437	41.598	63.81	Non
Penner sib	h6c3	1330.68	41.598	63.81	Non
Penner sib	h6c3	1249.766	41.598	63.81	Non
Penner sib	h6c3	1117.136	41.598	63.81	Non
Penner sib	h6c3	911.78	41.598	63.81	Non
Penner sib	h6c3	644.594	41.598	63.81	Non
Penner sib	h6c3	362.171	41.598	63.81	Non
Penner sib	h6c3	214.03	41.598	63.81	Non
Penner sib	h6c3	155.556	41.598	63.81	Non
Penner sib	h6c4	919.72	43.415	66.59	Non
Penner sib	h6c4	1077.342	46.685	71.625	Non
Penner sib	h6c4	1191.654	45.897	70.407	Non
Penner sib	h6c4	1433.869	45.897	70.407	Non
Penner sib	h6c4	1426.252	45.897	70.407	Non
Penner sib	h6c4	1265.765	45.897	70.407	Non
Penner sib	h6c4	961.66	45.897	70.407	Non
Penner sib	h6c4	645.117	45.897	70.407	Non
Penner sib	h6c4	372.489	45.897	70.407	Non
Penner sib	h6c4	236.615	45.897	70.407	Non
Penner sib	h6c4	161.482	45.897	70.407	Non
Penner sib	h6c5	1084.007	46.2	70.873	Non
Penner sib	h6c5	1280.885	46.2	70.873	Non
Penner sib	h6c5	1325.303	46.2	70.873	Non
Penner sib	h6c5	1201.7	46.2	70.873	Non
Penner sib	h6c5	1225.623	45.231	69.381	Non
Penner sib	h6c5	988.024	45.171	69.297	Non
Penner sib	h6c5	697.091	45.171	69.297	Non
Penner sib	h6c5	435.372	45.171	69.297	Non
Penner sib	h6c5	256.59	45.171	69.297	Non
Penner sib	h6c5	161.058	45.171	69.297	Non
Penner sib	h6c5	117.794	45.171	69.297	Non
Penner sib	h6c6	1009.955	36.391	55.814	Non
Penner sib	h6c6	1192.707	36.391	55.814	Non
Penner sib	h6c6	1204.031	36.391	55.814	Non
Penner sib	h6c6	1331.497	35.846	54.97	Non
Penner sib	h6c6	1169.327	35.846	54.97	Non
Penner sib	h6c6	954.392	35.846	54.97	Non
Penner sib	h6c6	716.74	35.846	54.97	Non
Penner sib	h6c6	479.592	35.846	54.97	Non
Penner sib	h6c6	297.627	35.846	54.97	Non
Penner sib	h6c6	188.467	35.846	54.97	Non
Penner sib	h6c6	133.317	35.846	54.97	Non
Penner sib	h7c1	845.272	39.721	60.927	Non
Penner sib	h7c1	972.919	39.721	60.927	Non
Penner sib	h7c1	882.157	39.721	60.927	Non
Penner sib	h7c1	655.281	39.721	60.927	Non
Penner sib	h7c1	405.926	39.721	60.927	Non
Penner sib	h7c1	246.674	39.721	60.927	Non
Penner sib	h7c1	138.389	39.721	60.927	Non
Penner sib	h7c1	85.552	39.721	60.927	Non
Penner sib	h7c2	936.567	34.756	53.296	Non
Penner sib	h7c2	1223.507	36.512	55.974	Non
Penner sib	h7c2	1265.83	36.512	55.974	Non
Penner sib	h7c2	1133.795	36.512	55.974	Non
Penner sib	h7c2	905.129	36.633	56.173	Non
Penner sib	h7c2	604.804	36.633	56.173	Non
Penner sib	h7c2	332.354	36.633	56.173	Non
Penner sib	h7c2	200.947	36.633	56.173	Non
Penner sib	h7c2	127.633	36.633	56.173	Non
Penner sib	h7c3	982.186	47.775	73.307	Non
Penner sib	h7c3	1305.899	46.745	71.691	Non
Penner sib	h7c3	1546.126	44.141	67.704	Non
Penner sib	h7c3	1241.199	44.141	67.704	Non
Penner sib	h7c3	789.616	44.141	67.704	Non
Penner sib	h7c3	405.193	44.141	67.704	Non
Penner sib	h7c3	230.966	44.141	67.704	Non
Penner sib	h7c3	136.265	44.141	67.704	Non
Penner sib	h7c4	1013.103	40.69	62.412	Non
Penner sib	h7c4	1167.664	40.69	62.412	Non
Penner sib	h7c4	1250.396	39.479	60.552	Non
Penner sib	h7c4	734.264	39.479	60.552	Non
Penner sib	h7c4	331.403	39.479	60.552	Non
Penner sib	h7c4	177.855	39.479	60.552	Non
Penner sib	h7c5	1160.676	40.872	62.686	Non
Penner sib	h7c5	1074.08	40.872	62.686	Non
Penner sib	h7c5	814.576	40.872	62.686	Non
Penner sib	h7c5	494.349	40.872	62.686	Non
Penner sib	h7c5	305.162	40.872	62.686	Non
Penner sib	h7c5	174.777	40.872	62.686	Non
Penner sib	h7c6	1505.518	35.725	54.791	Non
Penner sib	h7c6	1411.216	35.725	54.791	Non
Penner sib	h7c6	1113.283	35.725	54.791	Non
Penner sib	h7c6	901.074	38.086	58.403	Non
Penner sib	h7c6	711.177	38.086	58.403	Non
Penner sib	h7c6	542.946	38.086	58.403	Non
Penner sib	h7c6	423.109	38.086	58.403	Non
Penner sib	h7c6	302.825	38.086	58.403	Non
Penner sib	h7c7	1284.501	40.145	61.578	Non
Penner sib	h7c7	1400.624	40.145	61.578	Non
Penner sib	h7c7	1467.757	40.751	62.503	Non
Penner sib	h7c7	1509.471	40.751	62.503	Non
Penner sib	h7c7	1535.236	40.69	62.412	Non
Penner sib	h7c7	1187.485	40.69	62.412	Non
Penner sib	h7c7	898.429	40.69	62.412	Non
Penner sib	h7c7	602.006	40.69	62.412	Non
Penner sib	h7c7	407.391	40.69	62.412	Non
Penner sib	h7c8	1446.462	33.787	51.82	Non
Penner sib	h7c8	1655.775	33.787	51.82	Non
Penner sib	h7c8	1625.111	33.787	51.82	Non
Penner sib	h7c8	1464.32	33.787	51.82	Non
Penner sib	h7c8	1178.609	33.787	51.82	Non
Penner sib	h7c8	947.541	33.787	51.82	Non
Penner sib	h7c8	721.544	33.787	51.82	Non
Penner sib	h7c8	570.783	33.787	51.82	Non
Penner sib	h7c8	427.872	33.787	51.82	Non
Penner sib	h8c1	532.011	41.841	64.183	Non
Penner sib	h8c1	509.843	41.841	64.183	Non
Penner sib	h8c1	467.269	41.841	64.183	Non
Penner sib	h8c1	317.562	43.96	67.436	Non
Penner sib	h8c1	253.943	43.96	67.436	Non
Penner sib	h8c1	198.254	43.96	67.436	Non
Penner sib	h8c1	161.155	43.96	67.436	Non
Penner sib	h8c1	140.236	43.96	67.436	Non
Penner sib	h8c2	575.669	37.057	56.833	Non
Penner sib	h8c2	556.515	40.69	62.4	Non
Penner sib	h8c2	620.605	42.991	65.948	Non
Penner sib	h8c2	867.465	42.325	64.927	Non
Penner sib	h8c2	770.019	42.325	64.927	Non
Penner sib	h8c2	529.56	42.325	64.927	Non
Penner sib	h8c2	311.336	42.325	64.927	Non
Penner sib	h8c2	217.234	42.325	64.927	Non
Penner sib	h8c2	149.912	42.325	64.927	Non
Penner sib	h8c3	608.981	36.633	56.185	Non
Penner sib	h8c3	605.843	36.633	56.185	Non
Penner sib	h8c3	564.113	36.633	56.185	Non
Penner sib	h8c3	954.503	36.209	55.543	Non
Penner sib	h8c3	671.429	36.209	55.543	Non
Penner sib	h8c3	478.927	36.209	55.543	Non
Penner sib	h8c3	362.598	36.209	55.543	Non
Penner sib	h8c3	243.681	36.209	55.543	Non
Penner sib	h8c4	905.888	36.209	55.524	Non
Penner sib	h8c4	919.843	38.692	59.335	Non
Penner sib	h8c4	998.16	38.692	59.335	Non
Penner sib	h8c4	1283.844	38.874	59.62	Non
Penner sib	h8c4	1169.857	38.874	59.62	Non
Penner sib	h8c4	840.334	38.874	59.62	Non
Penner sib	h8c4	608.838	38.874	59.62	Non
Penner sib	h8c4	457.6	38.874	59.62	Non
Penner sib	h8c4	340.622	38.874	59.62	Non
Penner sib	h8c5	811.222	39.963	61.299	Non
Penner sib	h8c5	904.334	39.963	61.299	Non
Penner sib	h8c5	1027.548	40.448	62.035	Non
Penner sib	h8c5	971.06	40.448	62.035	Non
Penner sib	h8c5	767.752	40.448	62.035	Non
Penner sib	h8c5	592.339	40.448	62.035	Non
Penner sib	h8c5	432.527	40.448	62.035	Non
Penner sib	h8c5	315.874	40.448	62.035	Non
Penner sib	h8c6	792.365	40.085	61.486	Non
Penner sib	h8c6	980.663	40.024	61.378	Non
Penner sib	h8c6	934.566	41.659	63.906	Non
Penner sib	h8c6	799.386	41.659	63.906	Non
Penner sib	h8c6	610.45	41.659	63.906	Non
Penner sib	h8c6	422.344	41.659	63.906	Non
Penner sib	h8c6	259.572	41.659	63.906	Non
Penner sib	h8c6	186.514	41.659	63.906	Non
Penner sib	h8c6	145.372	41.659	63.906	Non
Penner sib	h9c1	861.219	33.242	50.973	Non
Penner sib	h9c1	919.924	33.242	50.973	Non
Penner sib	h9c1	937.072	33.242	50.973	Non
Penner sib	h9c1	996.348	34.393	52.733	Non
Penner sib	h9c1	1003.625	34.574	53.012	Non
Penner sib	h9c1	963.991	34.574	53.012	Non
Penner sib	h9c1	888.571	34.574	53.012	Non
Penner sib	h9c1	929.299	36.452	55.916	Non
Penner sib	h9c1	770.004	36.452	55.916	Non
Penner sib	h9c1	648.113	36.452	55.916	Non
Penner sib	h9c1	461.702	36.452	55.916	Non
Penner sib	h9c1	309.9	36.452	55.916	Non
Penner sib	h9c1	214.056	36.452	55.916	Non
Penner sib	h9c2	682.831	41.538	63.723	Non
Penner sib	h9c2	866.451	41.538	63.702	Non
Penner sib	h9c2	912.419	41.538	63.702	Non
Penner sib	h9c2	929.669	41.538	63.702	Non
Penner sib	h9c2	955.674	45.231	69.393	Non
Penner sib	h9c2	979.93	45.231	69.393	Non
Penner sib	h9c2	872.471	45.231	69.393	Non
Penner sib	h9c2	727.337	45.231	69.393	Non
Penner sib	h9c2	554.762	45.231	69.393	Non
Penner sib	h9c2	411.337	45.231	69.393	Non
Penner sib	h9c2	283.707	45.231	69.393	Non
Penner sib	h9c2	157.646	45.231	69.393	Non
Penner sib	h9c2	95.174	45.231	69.393	Non
Penner sib	h9c3	1028.379	33.727	51.712	Non
Penner sib	h9c3	1081.372	33.727	51.712	Non
Penner sib	h9c3	1071.721	33.727	51.712	Non
Penner sib	h9c3	967.475	41.114	63.056	Non
Penner sib	h9c3	991.472	41.114	63.056	Non
Penner sib	h9c3	1091.531	40.751	62.504	Non
Penner sib	h9c3	1114.091	40.751	62.504	Non
Penner sib	h9c3	1071.331	41.053	62.97	Non
Penner sib	h9c3	1203.966	38.874	59.615	Non
Penner sib	h9c3	1004.669	38.874	59.615	Non
Penner sib	h9c3	788.238	38.874	59.615	Non
Penner sib	h9c3	571.729	38.874	59.615	Non
Penner sib	h9c3	436.644	38.874	59.615	Non
Penner sib	h9c3	342.829	38.874	59.615	Non
Penner sib	h9c3	238.146	38.874	59.615	Non
Penner sib	h9c3	177.699	38.874	59.615	Non
Penner sib	h9c4	754.328	38.51	59.064	Non
Penner sib	h9c4	773.347	38.51	59.064	Non
Penner sib	h9c4	839.495	38.51	59.064	Non
Penner sib	h9c4	955.353	39.479	60.539	Non
Penner sib	h9c4	945.748	39.479	60.539	Non
Penner sib	h9c4	905.182	39.479	60.539	Non
Penner sib	h9c4	748.847	39.479	60.539	Non
Penner sib	h9c4	641.758	39.479	60.539	Non
Penner sib	h9c4	511.252	39.479	60.539	Non
Penner sib	h9c4	374.597	39.479	60.539	Non
Penner sib	h9c4	296.688	39.479	60.539	Non
Penner sib	h9c5	1007.851	25.371	38.872	Non
Penner sib	h9c5	1462.923	23.554	36.086	Non
Penner sib	h9c5	1169.843	34.151	52.375	Non
Penner sib	h9c5	1171.349	34.151	52.375	Non
Penner sib	h9c5	1093.528	34.151	52.375	Non
Penner sib	h9c5	955.517	36.088	55.347	Non
Penner sib	h9c5	836.758	36.088	55.347	Non
Penner sib	h9c5	723.648	36.088	55.347	Non
Penner sib	h9c5	567.802	36.088	55.347	Non
Penner sib	h9c5	489.57	36.088	55.347	Non
Penner sib	h9c5	400.42	36.088	55.347	Non
Penner sib	h9c5	451.785	35.846	54.969	Non
Penner sib	h9c5	381.976	35.846	54.969	Non
Penner sib	h9c5	297.392	35.846	54.969	Non
Penner mut	h10c1	298.29	33.771	54.826	Non
Penner mut	h10c1	414.581	37.986	61.679	Non
Penner mut	h10c1	371.056	38.31	62.215	Non
Penner mut	h10c1	196.564	38.31	62.215	Non
Penner mut	h10c1	59.829	38.31	62.215	Non
Penner mut	h10c2	307.398	36.527	59.308	Non
Penner mut	h10c2	411.88	37.662	61.166	Non
Penner mut	h10c2	275.837	37.662	61.166	Non
Penner mut	h10c2	112.543	37.662	61.166	Non
Penner mut	h10c2	34.818	37.662	61.166	Non
Penner mut	h10c3	249.344	32.475	52.718	Non
Penner mut	h10c3	331.119	39.337	63.885	Non
Penner mut	h10c3	401.175	37.121	60.277	Non
Penner mut	h10c3	262.374	37.121	60.277	Non
Penner mut	h10c3	123.493	37.121	60.277	Non
Penner mut	h10c3	41.874	37.121	60.277	Non
Penner mut	h10c4	416.458	37.121	60.284	Non
Penner mut	h10c4	345.659	38.202	62.041	Non
Penner mut	h10c4	251.792	38.202	62.041	Non
Penner mut	h10c4	165.743	38.202	62.041	Non
Penner mut	h10c4	109.765	38.202	62.041	Non
Penner mut	h10c4	74.515	38.202	62.041	Non
Penner mut	h10c5	303.568	40.31	65.448	Non
Penner mut	h10c5	325.197	48.523	78.811	Non
Penner mut	h10c5	395.739	46.037	74.772	Non
Penner mut	h10c5	286.839	46.037	74.772	Non
Penner mut	h10c5	112.054	46.037	74.772	Non
Penner mut	h10c6	253.28	34.96	56.752	Non
Penner mut	h10c6	305.828	36.527	59.313	Non
Penner mut	h10c6	344.951	38.418	62.386	Non
Penner mut	h10c6	274.401	38.418	62.386	Non
Penner mut	h10c6	134.1	38.418	62.386	Non
Penner mut	h10c6	60.446	38.418	62.386	Non
Penner mut	h11c1	247.966	37.176	60.368	Non
Penner mut	h11c1	309.3	40.364	65.558	Non
Penner mut	h11c1	401.629	43.011	69.863	Non
Penner mut	h11c1	298.976	42.957	69.767	Non
Penner mut	h11c1	107.523	42.957	69.767	Non
Penner mut	h11c1	57.653	42.957	69.767	Non
Penner mut	h11c2	191.901	43.065	69.938	Non
Penner mut	h11c2	319.733	44.632	72.493	Non
Penner mut	h11c2	354.395	44.632	72.493	Non
Penner mut	h11c2	212.852	43.498	70.641	Non
Penner mut	h11c2	130.129	43.498	70.641	Non
Penner mut	h11c2	74.467	43.498	70.641	Non
Penner mut	h11c3	281.556	29.665	48.147	Non
Penner mut	h11c3	295.387	30.313	49.202	Non
Penner mut	h11c3	393.824	39.391	63.967	Non
Penner mut	h11c3	353.934	40.742	66.154	Non
Penner mut	h11c3	216.647	40.742	66.154	Non
Penner mut	h11c3	146.822	40.742	66.154	Non
Penner mut	h11c3	92.995	40.742	66.154	Non
Penner mut	h11c4	352.303	41.552	67.491	Non
Penner mut	h11c4	452.561	45.443	73.801	Non
Penner mut	h11c4	477.361	47.442	77.076	Non
Penner mut	h11c4	305.722	47.442	77.076	Non
Penner mut	h11c4	119.417	47.442	77.076	Non
Penner mut	h11c4	78.356	47.442	77.076	Non
Penner mut	h11c5	210.592	42.147	68.441	Non
Penner mut	h11c5	293.723	44.254	71.873	Non
Penner mut	h11c5	320.984	44.578	72.415	Non
Penner mut	h11c5	154.975	44.578	72.415	Non
Penner mut	h11c5	70.412	44.578	72.415	Non
Penner mut	h12c1	291.582	37.446	60.806	Non
Penner mut	h12c1	302.422	39.283	63.79	Non
Penner mut	h12c1	331.993	38.797	62.999	Non
Penner mut	h12c1	334.082	38.797	62.999	Non
Penner mut	h12c1	356.569	38.797	62.999	Non
Penner mut	h12c1	360.55	38.797	62.999	Non
Penner mut	h12c1	305.924	38.797	62.999	Non
Penner mut	h12c1	166.403	38.797	62.999	Non
Penner mut	h12c1	99.29	38.797	62.999	Non
Penner mut	h12c2	198.26	28.26	45.879	Non
Penner mut	h12c2	183.751	37.067	60.202	Non
Penner mut	h12c2	229.661	39.499	64.139	Non
Penner mut	h12c2	309.601	40.201	65.288	Non
Penner mut	h12c2	334.385	40.201	65.288	Non
Penner mut	h12c2	356.13	42.201	68.531	Non
Penner mut	h12c2	285.474	43.768	71.083	Non
Penner mut	h12c2	142.348	43.768	71.083	Non
Penner mut	h12c2	49.153	43.768	71.083	Non
Penner mut	h12c3	290.615	41.444	67.313	Non
Penner mut	h12c3	282.171	41.444	67.313	Non
Penner mut	h12c3	231.344	43.173	70.124	Non
Penner mut	h12c3	234.153	43.173	70.124	Non
Penner mut	h12c3	266.684	44.362	72.055	Non
Penner mut	h12c3	255.766	44.362	72.055	Non
Penner mut	h12c3	318.364	43.389	70.461	Non
Penner mut	h12c3	216.594	43.389	70.461	Non
Penner mut	h12c3	122.432	43.389	70.461	Non
Penner mut	h12c4	225.288	41.822	67.924	Non
Penner mut	h12c4	235.075	41.822	67.924	Non
Penner mut	h12c4	337.252	40.58	65.907	Non
Penner mut	h12c4	330.312	40.58	65.907	Non
Penner mut	h12c4	310.183	40.58	65.907	Non
Penner mut	h12c4	268.881	40.58	65.907	Non
Penner mut	h12c4	184.53	40.58	65.907	Non
Penner mut	h12c4	126.483	40.58	65.907	Non
Penner mut	h12c4	75.532	40.58	65.907	Non
Penner mut	h12c4	46.978	40.58	65.907	Non
Penner mut	h13c1	354.198	42.255	68.616	Non
Penner mut	h13c1	433.297	42.255	68.618	Non
Penner mut	h13c1	456.498	42.363	68.792	Non
Penner mut	h13c1	547.103	41.498	67.39	Non
Penner mut	h13c1	447.723	41.444	67.302	Non
Penner mut	h13c1	194.292	41.444	67.302	Non
Penner mut	h13c1	117.868	41.444	67.302	Non
Penner mut	h13c2	407.169	35.717	57.989	Non
Penner mut	h13c2	398.748	35.717	57.989	Non
Penner mut	h13c2	605.11	38.256	62.129	Non
Penner mut	h13c2	504.091	38.256	62.129	Non
Penner mut	h13c2	240.783	38.256	62.129	Non
Penner mut	h13c3	372.461	45.119	73.279	Non
Penner mut	h13c3	379.866	45.119	73.279	Non
Penner mut	h13c3	416.208	46.632	75.742	Non
Penner mut	h13c3	252.859	46.577	75.65	Non
Penner mut	h13c3	56.975	46.577	75.65	Non
Penner mut	h13c4	221.145	43.822	71.18	Non
Penner mut	h13c4	403.222	45.821	74.423	Non
Penner mut	h13c4	425.361	45.281	73.556	Non
Penner mut	h13c4	396.684	43.335	70.386	Non
Penner mut	h13c4	239.923	43.335	70.386	Non
Penner mut	h13c4	121.525	43.335	70.386	Non
Penner mut	h14c1	704.086	25.18	40.853	Non
Penner mut	h14c1	764.028	28.746	46.661	Non
Penner mut	h14c1	960.118	30.799	49.988	Non
Penner mut	h14c1	997.318	30.799	49.993	Non
Penner mut	h14c1	772.45	30.799	49.993	Non
Penner mut	h14c1	670.44	30.799	49.993	Non
Penner mut	h14c1	442.725	30.799	49.993	Non
Penner mut	h14c1	243.122	30.799	49.993	Non
Penner mut	h14c1	104.929	30.799	49.993	Non
Penner mut	h14c2	640.477	34.042	55.27	Non
Penner mut	h14c2	762.602	36.635	59.482	Non
Penner mut	h14c2	793.945	38.418	62.392	Non
Penner mut	h14c2	595.791	37.662	61.167	Non
Penner mut	h14c2	606.088	36.581	59.404	Non
Penner mut	h14c2	537.379	36.581	59.404	Non
Penner mut	h14c2	420.232	36.581	59.404	Non
Penner mut	h14c3	703.044	42.201	68.53	Non
Penner mut	h14c3	795.979	42.201	68.53	Non
Penner mut	h14c3	828.296	46.253	75.119	Non
Penner mut	h14c3	809.734	46.253	75.119	Non
Penner mut	h14c3	764.078	46.253	75.119	Non
Penner mut	h14c3	756.131	45.929	74.59	Non
Penner mut	h14c3	615.045	45.929	74.59	Non
Penner mut	h14c3	325.785	45.929	74.59	Non
Penner mut	h14c3	248.913	45.929	74.59	Non
Penner mut	h14c4	531.003	34.15	55.446	Non
Penner mut	h14c4	705.444	35.933	58.342	Non
Penner mut	h14c4	911.769	34.96	56.77	Non
Penner mut	h14c4	878.988	34.96	56.77	Non
Penner mut	h14c4	830.527	34.636	56.23	Non
Penner mut	h14c4	804.746	34.69	56.335	Non
Penner mut	h14c4	607.833	34.69	56.335	Non
Penner mut	h14c4	528.121	34.69	56.335	Non
Penner mut	h14c4	390.015	34.69	56.335	Non
Penner mut	h14c4	265.861	34.69	56.335	Non
Penner mut	h14c4	160.509	34.69	56.335	Non
Penner mut	h14c5	762.362	41.498	67.405	Non
Penner mut	h14c5	742.101	41.498	67.405	Non
Penner mut	h14c5	676.945	43.281	70.293	Non
Penner mut	h14c5	765.98	41.931	68.109	Non
Penner mut	h14c5	695.673	41.931	68.109	Non
Penner mut	h14c5	548.369	41.931	68.109	Non
Penner mut	h14c5	459.544	41.985	68.187	Non
Penner mut	h14c5	323.476	41.822	67.92	Non
Penner mut	h14c5	283.623	41.822	67.92	Non
Penner mut	h14c5	238.717	41.822	67.92	Non
Penner mut	h14c5	183.862	41.822	67.92	Non
Penner mut	h15c1	383.468	36.365	59.051	Non
Penner mut	h15c1	557.594	38.797	62.988	Non
Penner mut	h15c1	574.927	38.797	62.988	Non
Penner mut	h15c1	732.252	41.174	66.877	Non
Penner mut	h15c1	844.395	41.174	66.873	Non
Penner mut	h15c1	724.985	41.066	66.703	Non
Penner mut	h15c1	429.423	41.066	66.703	Non
Penner mut	h15c1	194.799	41.066	66.703	Non
Penner mut	h15c1	127.748	41.066	66.703	Non
Penner mut	h15c2	665.195	37.176	60.35	Non
Penner mut	h15c2	836.506	36.635	59.481	Non
Penner mut	h15c2	814.169	36.527	59.312	Non
Penner mut	h15c2	463.612	36.527	59.312	Non
Penner mut	h15c2	220.968	36.527	59.312	Non
Penner mut	h15c2	134.559	36.527	59.312	Non
Penner mut	h15c3	521.174	42.633	69.249	Non
Penner mut	h15c3	553.124	42.309	68.712	Non
Penner mut	h15c3	536.158	41.066	66.684	Non
Penner mut	h15c3	272.035	41.066	66.684	Non
Penner mut	h15c3	149.127	41.066	66.684	Non
Penner mut	h15c4	497.205	34.204	55.535	Non
Penner mut	h15c4	544.069	34.204	55.535	Non
Penner mut	h15c4	607.066	34.582	56.147	Non
Penner mut	h15c4	725.081	34.312	55.7	Non
Penner mut	h15c4	753.857	35.663	57.917	Non
Penner mut	h15c4	670.047	35.663	57.917	Non
Penner mut	h15c4	413.93	35.663	57.917	Non
Penner mut	h15c4	273.075	35.663	57.917	Non
Penner mut	h15c5	582.656	38.851	63.087	Non
Penner mut	h15c5	671.82	38.851	63.087	Non
Penner mut	h15c5	759.008	39.499	64.134	Non
Penner mut	h15c5	742.373	39.661	64.412	Non
Penner mut	h15c5	647.768	39.661	64.412	Non
Penner mut	h15c5	512.505	39.661	64.412	Non
Penner mut	h15c5	361.929	39.661	64.412	Non
Penner mut	h15c5	231.757	39.661	64.412	Non
Penner mut	h15c5	127.788	39.661	64.412	Non
Penner mut	h16c2	509.447	34.582	56.145	Non
Penner mut	h16c2	692.853	37.013	60.093	Non
Penner mut	h16c2	665.667	36.959	60.004	Non
Penner mut	h16c2	466.082	36.959	60.004	Non
Penner mut	h16c2	277.333	39.823	64.674	Non
Penner mut	h16c2	131.028	39.823	64.674	Non
Penner mut	h16c2	50.388	39.823	64.674	Non
Penner mut	h16c3	506.481	33.555	54.479	Non
Penner mut	h16c3	706.758	36.797	59.751	Non
Penner mut	h16c3	738.667	37.716	61.252	Non
Penner mut	h16c3	524.573	37.716	61.252	Non
Penner mut	h16c3	153.927	37.716	61.252	Non
Penner mut	h16c3	32.635	37.716	61.252	Non
Penner mut	h16c4	341.516	30.691	49.81	Non
Penner mut	h16c4	526.554	33.933	55.1	Non
Penner mut	h16c4	577.357	35.5	57.64	Non
Penner mut	h16c4	439.715	36.365	59.054	Non
Penner mut	h16c4	314.123	36.257	58.873	Non
Penner mut	h16c4	173.329	36.257	58.873	Non
Penner mut	h16c4	81.755	36.257	58.873	Non
Penner mut	h17c1	271.971	40.742	66.154	Non
Penner mut	h17c1	267.268	40.742	66.154	Non
Penner mut	h17c1	241.689	40.742	66.154	Non
Penner mut	h17c1	241.868	39.499	64.158	Non
Penner mut	h17c1	206.439	39.499	64.158	Non
Penner mut	h17c1	167.987	39.499	64.158	Non
Penner mut	h17c1	139.485	39.499	64.158	Non
Penner mut	h17c1	123.5	39.499	64.158	Non
Penner mut	h17c2	248.524	41.606	67.577	Non
Penner mut	h17c2	246.784	41.606	67.577	Non
Penner mut	h17c2	240.302	41.606	67.577	Non
Penner mut	h17c2	225.677	41.606	67.577	Non
Penner mut	h17c2	208.082	41.606	67.577	Non
Penner mut	h17c2	209.612	45.497	73.884	Non
Penner mut	h17c2	187.776	45.497	73.884	Non
Penner mut	h17c2	163.23	45.497	73.884	Non
Penner mut	h17c2	142.964	45.497	73.884	Non
Penner mut	h17c3	239.569	55.925	90.879	Non
Penner mut	h17c3	239.569	55.925	90.879	Non
Penner mut	h17c3	228.857	55.925	90.879	Non
Penner mut	h17c3	232.901	54.25	88.132	Non
Penner mut	h17c3	209.625	54.25	88.132	Non
Penner mut	h17c3	183.716	54.25	88.132	Non
Penner mut	h17c3	164.114	54.25	88.132	Non
Penner mut	h17c3	148.752	54.25	88.132	Non
Penner mut	h17c3	136.643	54.25	88.132	Non
Penner mut	h17c3	122.958	54.25	88.132	Non
Penner mut	h17c4	253.951	39.391	63.97	Non
Penner mut	h17c4	275.985	39.391	63.97	Non
Penner mut	h17c4	281.546	39.391	63.97	Non
Penner mut	h17c4	280.596	40.31	65.459	Non
Penner mut	h17c4	261.433	40.31	65.459	Non
Penner mut	h17c4	230.199	40.31	65.459	Non
Penner mut	h17c4	220.749	40.147	65.208	Non
Penner mut	h17c4	193.912	40.147	65.208	Non
Penner mut	h17c4	169.963	40.147	65.208	Non
Penner mut	h17c4	146.268	40.147	65.208	Non
Penner mut	h17c4	129.658	40.147	65.208	Non
Penner mut	h18c1	602.576	37.878	61.51	Non
Penner mut	h18c1	586.733	37.878	61.51	Non
Penner mut	h18c1	528.776	37.878	61.51	Non
Penner mut	h18c1	466.955	37.878	61.51	Non
Penner mut	h18c1	402.877	38.094	61.858	Non
Penner mut	h18c1	308.875	38.094	61.858	Non
Penner mut	h18c1	243.047	38.094	61.858	Non
Penner mut	h18c1	208.184	38.094	61.858	Non
Penner mut	h18c1	179.255	38.094	61.858	Non
Penner mut	h18c1	155.242	38.094	61.858	Non
Penner mut	h18c2	367.578	38.202	62.026	Non
Penner mut	h18c2	354.695	38.202	62.026	Non
Penner mut	h18c2	324.889	38.202	62.026	Non
Penner mut	h18c2	278.428	38.202	62.026	Non
Penner mut	h18c2	238.389	38.202	62.026	Non
Penner mut	h18c2	243.821	43.335	70.379	Non
Penner mut	h18c2	229.059	43.335	70.379	Non
Penner mut	h18c2	213.965	43.335	70.379	Non
Penner mut	h18c2	198.722	43.335	70.379	Non
Penner mut	h18c3	390.075	45.767	74.33	Non
Penner mut	h18c3	411.948	45.767	74.33	Non
Penner mut	h18c3	413.185	45.767	74.33	Non
Penner mut	h18c3	393.271	45.767	74.33	Non
Penner mut	h18c3	397.443	42.147	68.441	Non
Penner mut	h18c3	350.623	42.147	68.441	Non
Penner mut	h18c3	316.456	42.147	68.441	Non
Penner mut	h18c3	291.95	42.147	68.441	Non
Penner mut	h18c3	269.234	42.147	68.441	Non
Penner mut	h18c3	253.983	42.147	68.441	Non
Penner mut	h18c4	409.057	40.688	66.083	Non
Penner mut	h18c4	399.701	40.688	66.083	Non
Penner mut	h18c4	385.845	40.688	66.083	Non
Penner mut	h18c4	368.063	40.688	66.083	Non
Penner mut	h18c4	328.98	40.688	66.083	Non
Penner mut	h18c4	286.129	40.688	66.083	Non
Penner mut	h18c4	257.167	40.688	66.083	Non
Penner mut	h18c4	231.152	40.688	66.083	Non
Penner mut	h18c5	480.386	40.31	65.456	Non
Penner mut	h18c5	573.625	40.31	65.456	Non
Penner mut	h18c5	600.025	40.31	65.456	Non
Penner mut	h18c5	599.509	40.31	65.456	Non
Penner mut	h18c5	563.815	40.31	65.456	Non
Penner mut	h18c5	477.969	40.31	65.456	Non
Penner mut	h18c5	400.207	40.31	65.456	Non
Penner mut	h18c5	357.52	40.31	65.456	Non
Penner mut	h18c5	326.189	40.31	65.456	Non
Penner mut	h18c5	290.235	40.31	65.456	Non
Penner mut	h18c6	225.317	55.493	90.156	Non
Penner mut	h18c6	219.74	55.493	90.156	Non
Penner mut	h18c6	192.44	55.493	90.156	Non
Penner mut	h18c6	175.163	55.115	89.538	Non
Penner mut	h18c6	160.004	55.115	89.538	Non
Penner mut	h18c6	146.059	55.115	89.538	Non
Penner mut	h18c6	132.923	55.115	89.538	Non
Penner mut	h19c1	190.959	42.687	69.336	Non
Penner mut	h19c1	191.934	42.687	69.336	Non
Penner mut	h19c1	178.671	42.687	69.336	Non
Penner mut	h19c1	162.46	42.687	69.336	Non
Penner mut	h19c2	174.021	44.956	73.031	Non
Penner mut	h19c2	165.457	44.956	73.031	Non
Penner mut	h19c2	155.815	44.956	73.031	Non
Penner mut	h19c2	142.18	44.956	73.031	Non
Penner mut	h19c2	128.062	44.956	73.031	Non
Penner mut	h19c2	118.134	44.956	73.031	Non
Penner mut	h20c1	181.264	37.824	61.424	Non
Penner mut	h20c1	192.005	37.824	61.424	Non
Penner mut	h20c1	198.123	37.824	61.424	Non
Penner mut	h20c1	201.828	37.824	61.424	Non
Penner mut	h20c1	202.457	37.824	61.424	Non
Penner mut	h20c1	205.834	37.824	61.424	Non
Penner mut	h20c1	208.358	37.824	61.424	Non
Penner mut	h20c1	207.954	37.824	61.424	Non
Penner mut	h20c1	190.245	47.01	76.358	Non
Penner mut	h20c1	182.121	47.01	76.358	Non
Penner mut	h20c1	169.96	47.01	76.358	Non
Penner mut	h20c2	156.51	47.874	77.767	Non
Penner mut	h20c2	159.106	47.874	77.767	Non
Penner mut	h20c2	162.832	47.874	77.767	Non
Penner mut	h20c2	168.596	47.874	77.767	Non
Penner mut	h20c2	171.145	47.874	77.767	Non
Penner mut	h20c2	171.925	47.874	77.767	Non
Penner mut	h20c2	166.252	47.874	77.767	Non
Penner mut	h20c3	187.795	53.872	87.512	Non
Penner mut	h20c3	199.204	53.872	87.512	Non
Penner mut	h20c3	208.62	53.872	87.512	Non
Penner mut	h20c3	224.4	53.17	86.359	Non
Penner mut	h20c3	204.99	53.17	86.359	Non
Penner mut	h20c3	188.978	53.17	86.359	Non
Penner mut	h20c3	164.802	53.17	86.359	Non
Penner mut	h20c3	141.911	53.17	86.359	Non
Penner mut	h20c3	126.655	53.17	86.359	Non
Penner mut	h21c1	246.295	40.742	66.165	Non
Penner mut	h21c1	268.866	40.742	66.165	Non
Penner mut	h21c1	287.854	40.742	66.165	Non
Penner mut	h21c1	286.066	40.742	66.165	Non
Penner mut	h21c1	265.236	40.742	66.165	Non
Penner mut	h21c1	242.765	40.742	66.165	Non
Penner mut	h21c1	218.599	40.742	66.165	Non
Penner mut	h21c1	192.629	40.742	66.165	Non
Penner mut	h21c1	166.646	40.742	66.165	Non
Penner mut	h21c1	148.281	40.742	66.165	Non
Penner mut	h21c2	252.276	44.956	73.027	Non
Penner mut	h21c2	254.733	44.956	73.027	Non
Penner mut	h21c2	249.593	44.956	73.027	Non
Penner mut	h21c2	239.29	44.956	73.027	Non
Penner mut	h21c2	292.365	38.256	62.117	Non
Penner mut	h21c2	282.141	38.256	62.117	Non
Penner mut	h21c2	266.235	38.256	62.117	Non
Penner mut	h21c2	244.842	38.256	62.117	Non
Penner mut	h21c2	239.63	40.688	66.075	Non
Penner mut	h21c2	198.039	40.688	66.075	Non
Penner mut	h21c2	171.289	40.688	66.075	Non
Penner mut	h21c3	238.865	39.499	64.143	Non
Penner mut	h21c3	259.649	39.499	64.143	Non
Penner mut	h21c3	262.803	39.499	64.143	Non
Penner mut	h21c3	258.051	39.499	64.143	Non
Penner mut	h21c3	237.679	39.499	64.143	Non
Penner mut	h21c3	201.196	39.499	64.143	Non
Penner mut	h21c3	173.263	39.499	64.143	Non
Penner mut	h21c4	197.268	36.473	59.23	Non
Penner mut	h21c4	200.938	36.473	59.23	Non
Penner mut	h21c4	203.439	36.473	59.23	Non
Penner mut	h21c4	201.404	36.473	59.23	Non
Penner mut	h21c4	195.623	36.473	59.23	Non
Penner mut	h21c4	184.287	36.473	59.23	Non
Penner mut	h21c4	170.395	36.473	59.23	Non
Penner mut	h21c5	244.145	46.037	74.792	Non
Penner mut	h21c5	242.737	46.037	74.792	Non
Penner mut	h21c5	230.558	46.037	74.792	Non
Penner mut	h21c5	216.236	46.037	74.792	Non
Penner mut	h21c5	214.434	45.713	74.253	Non
Penner mut	h21c5	199.592	45.713	74.253	Non
Penner mut	h21c5	176.652	45.713	74.253	Non
Penner mut	h22c1	322.243	34.366	55.793	Non
Penner mut	h22c1	332.215	34.366	55.793	Non
Penner mut	h22c1	328.598	34.366	55.793	Non
Penner mut	h22c1	369.37	36.851	59.823	Non
Penner mut	h22c1	362.381	36.851	59.823	Non
Penner mut	h22c1	342.31	36.851	59.823	Non
Penner mut	h22c1	318.92	36.851	59.823	Non
Penner mut	h22c1	276.504	36.851	59.823	Non
Penner mut	h22c1	226.873	36.851	59.823	Non
Penner mut	h22c1	197.738	36.851	59.823	Non
Penner mut	h22c1	175.528	36.851	59.823	Non
Penner mut	h22c1	155.411	36.851	59.823	Non
Penner mut	h22c1	140.094	36.851	59.823	Non
Penner mut	h22c2	287.024	45.659	74.18	Non
Penner mut	h22c2	280.414	45.659	74.18	Non
Penner mut	h22c2	271.49	45.659	74.18	Non
Penner mut	h22c2	257.424	45.659	74.18	Non
Penner mut	h22c2	240.41	45.659	74.18	Non
Penner mut	h22c2	214.326	45.659	74.18	Non
Penner mut	h22c2	192.304	45.659	74.18	Non
Penner mut	h22c2	173.04	45.659	74.18	Non
Penner mut	h22c2	153.163	45.659	74.18	Non
Penner mut	h22c2	138.084	45.659	74.18	Non
Penner mut	h22c3	271.333	40.093	65.104	Non
Penner mut	h22c3	264.805	40.093	65.104	Non
Penner mut	h22c3	250.436	40.093	65.104	Non
Penner mut	h22c3	226.494	40.093	65.104	Non
Penner mut	h22c3	205.8	40.093	65.104	Non
Penner mut	h22c3	186.401	40.093	65.104	Non
Penner mut	h22c3	164.087	40.093	65.104	Non
Penner mut	h22c3	142.719	40.093	65.104	Non
Penner mut	h22c3	126.751	40.093	65.104	Non
Penner mut	h22c4	291.68	37.662	61.165	Non
Penner mut	h22c4	299.317	37.662	61.165	Non
Penner mut	h22c4	297.734	37.662	61.165	Non
Penner mut	h22c4	281.232	38.959	63.263	Non
Penner mut	h22c4	266.003	38.959	63.263	Non
Penner mut	h22c4	238.819	38.959	63.263	Non
Penner mut	h22c4	214.552	38.959	63.263	Non
Penner mut	h22c4	192.032	38.959	63.263	Non
Penner mut	h22c4	167.103	38.959	63.263	Non
Penner mut	h22c4	146.262	38.959	63.263	Non
Penner mut	h23c1	243.827	45.173	73.366	Non
Penner mut	h23c1	256.197	45.173	73.366	Non
Penner mut	h23c1	252.848	45.173	73.366	Non
Penner mut	h23c1	228.633	45.173	73.366	Non
Penner mut	h23c1	195.784	45.173	73.366	Non
Penner mut	h23c1	165.026	45.173	73.366	Non
Penner mut	h23c1	138.468	45.173	73.366	Non
Penner mut	h23c1	119.33	45.173	73.366	Non
Penner mut	h23c1	108.48	45.173	73.366	Non
Penner mut	h23c2	247.1	38.526	62.562	Non
Penner mut	h23c2	247.22	38.526	62.562	Non
Penner mut	h23c2	238.951	38.526	62.562	Non
Penner mut	h23c2	226.712	44.146	71.691	Non
Penner mut	h23c2	207.914	44.146	71.691	Non
Penner mut	h23c2	191.298	44.146	71.691	Non
Penner mut	h23c2	169.729	44.146	71.691	Non
Penner mut	h23c2	151.252	44.146	71.691	Non
Penner mut	h23c2	136.286	44.146	71.691	Non
Penner mut	h23c3	238.628	37.608	61.068	Non
Penner mut	h23c3	238.844	37.608	61.068	Non
Penner mut	h23c3	234.201	37.608	61.068	Non
Penner mut	h23c3	219.848	37.608	61.068	Non
Penner mut	h23c3	197.041	37.608	61.068	Non
Penner mut	h23c3	172.186	37.608	61.068	Non
Penner mut	h23c3	152.535	37.608	61.068	Non
Penner mut	h23c3	139.526	37.608	61.068	Non
Penner mut	h23c3	128.763	37.608	61.068	Non
Penner mut	h23c3	120.474	37.608	61.068	Non
Penner mut	h23c3	114.153	37.608	61.068	Non
Penner mut	h23c4	210.145	35.014	56.845	Non
Penner mut	h23c4	218.552	35.014	56.845	Non
Penner mut	h23c4	222.339	35.014	56.856	Non
Penner mut	h23c4	219.729	35.014	56.856	Non
Penner mut	h23c4	215.137	35.014	56.856	Non
Penner mut	h23c4	202.13	35.014	56.856	Non
Penner mut	h23c4	178.521	35.014	56.856	Non
Penner mut	h23c4	155.91	35.014	56.856	Non
Penner mut	h23c4	137.747	35.014	56.856	Non
Penner mut	h23c4	126.546	35.014	56.856	Non
Penner mut	h24c1	253.416	36.257	58.867	Non
Penner mut	h24c1	257.189	36.257	58.867	Non
Penner mut	h24c1	250.914	36.257	58.867	Non
Penner mut	h24c1	236.391	36.257	58.867	Non
Penner mut	h24c1	233.163	36.743	59.649	Non
Penner mut	h24c1	208.415	36.743	59.649	Non
Penner mut	h24c1	174.366	36.743	59.649	Non
Penner mut	h24c1	144.023	36.743	59.649	Non
Penner mut	h24c1	119.989	36.743	59.649	Non
Penner mut	h24c2	245.841	37.716	61.247	Non
Penner mut	h24c2	275.778	37.716	61.247	Non
Penner mut	h24c2	292.09	37.716	61.247	Non
Penner mut	h24c2	298.953	37.716	61.247	Non
Penner mut	h24c2	279.611	37.716	61.247	Non
Penner mut	h24c2	241.916	37.716	61.247	Non
Penner mut	h24c2	204.943	37.716	61.247	Non
Penner mut	h24c2	171.582	37.716	61.247	Non
Penner mut	h24c2	141.082	39.553	64.239	Non
Penner mut	h24c2	121.645	39.553	64.239	Non
Penner mut	h24c2	111.572	39.553	64.239	Non
Penner mut	h24c3	231.639	34.258	55.624	Non
Penner mut	h24c3	241.034	34.258	55.624	Non
Penner mut	h24c3	244.884	34.258	55.624	Non
Penner mut	h24c3	228.751	34.258	55.624	Non
Penner mut	h24c3	222.137	35.122	57.027	Non
Penner mut	h24c3	201.261	35.122	57.027	Non
Penner mut	h24c3	179.74	35.122	57.027	Non
Penner mut	h24c3	158.46	35.122	57.027	Non
Penner mut	h24c3	139.853	35.122	57.027	Non
Penner mut	h24c3	128.051	35.122	57.027	Non
Penner mut	h24c3	120.089	35.122	57.027	Non
Penner mut	h24c4	218.921	33.771	54.83	Non
Penner mut	h24c4	230.029	33.771	54.83	Non
Penner mut	h24c4	242.834	33.771	54.83	Non
Penner mut	h24c4	270.342	35.879	58.259	Non
Penner mut	h24c4	272.948	35.879	58.259	Non
Penner mut	h24c4	250.989	35.879	58.259	Non
Penner mut	h24c4	213.515	35.879	58.259	Non
Penner mut	h24c4	172.146	35.879	58.259	Non
Penner mut	h24c4	139.065	35.879	58.259	Non
Penner mut	h24c4	121.342	35.879	58.259	Non
Penner mut	h24c4	110.797	35.879	58.259	Non
Penner mut	h24c4	102.818	35.879	58.259	Non
Penner mut	h24c5	240.768	33.555	54.477	Non
Penner mut	h24c5	242.485	33.555	54.477	Non
Penner mut	h24c5	230.897	33.555	54.477	Non
Penner mut	h24c5	211.144	33.555	54.477	Non
Penner mut	h24c5	211.946	35.392	57.46	Non
Penner mut	h24c5	182.81	35.392	57.46	Non
Penner mut	h24c5	155.868	35.392	57.46	Non
Penner mut	h24c5	134.949	35.392	57.46	Non
Penner mut	h24c5	123.223	35.392	57.46	Non
Penner mut	h24c5	115.528	35.392	57.46	Non
Penner mut	h24c5	107.97	35.392	57.46	Non
Penner mut	h24c5	100.717	35.392	57.46	Non
Penner mut	h25c1	133.558	51.441	83.556	Non
Penner mut	h25c1	144.537	51.441	83.556	Non
Penner mut	h25c1	153.973	51.441	83.556	Non
Penner mut	h25c1	160.554	51.441	83.556	Non
Penner mut	h25c1	162.46	51.441	83.556	Non
Penner mut	h25c1	167.763	51.441	83.556	Non
Penner mut	h25c1	179.524	47.928	77.842	Non
Penner mut	h25c1	190.18	47.928	77.842	Non
Penner mut	h25c1	190.006	47.928	77.842	Non
Penner mut	h25c2	291.083	37.23	60.471	Non
Penner mut	h25c2	294.954	37.23	60.471	Non
Penner mut	h25c2	286.705	37.23	60.471	Non
Penner mut	h25c2	261.093	37.23	60.471	Non
Penner mut	h25c2	248.547	37.986	61.691	Non
Penner mut	h25c2	208.355	37.986	61.691	Non
Penner mut	h25c2	173.604	37.986	61.691	Non
Penner mut	h25c2	150.352	37.986	61.691	Non
Penner mut	h25c3	240.587	38.526	62.553	Non
Penner mut	h25c3	245.391	38.526	62.553	Non
Penner mut	h25c3	242.958	38.526	62.553	Non
Penner mut	h25c3	235.168	41.877	68.009	Non
Penner mut	h25c3	222.882	41.877	68.009	Non
Penner mut	h25c3	205.767	41.877	68.009	Non
Penner mut	h25c3	180.08	41.877	68.009	Non
Penner mut	h25c3	157.885	41.877	68.009	Non
Penner mut	h25c3	142.943	41.877	68.009	Non
Penner mut	h25c4	249.354	33.988	55.176	Non
Penner mut	h25c4	260.059	33.988	55.176	Non
Penner mut	h25c4	258.555	33.988	55.176	Non
Penner mut	h25c4	238.855	33.988	55.176	Non
Penner mut	h25c4	210.888	33.988	55.176	Non
Penner mut	h25c4	186.319	33.988	55.176	Non
Penner mut	h25c4	172.221	33.988	55.176	Non
Penner mut	h25c5	254.215	36.797	59.759	Non
Penner mut	h25c5	261.928	36.797	59.759	Non
Penner mut	h25c5	251.647	36.797	59.759	Non
Penner mut	h25c5	236.753	36.797	59.759	Non
Penner mut	h25c5	219.583	36.797	59.759	Non
Penner mut	h25c5	197.407	36.797	59.759	Non
Penner mut	h25c5	170.124	36.797	59.759	Non
Penner mut	h25c5	146.55	36.797	59.759	Non
Penner mut	h3c1	618.128	43.112	66.148	Non
Penner mut	h3c1	683.725	43.112	66.148	Non
Penner mut	h3c1	705.545	43.112	66.148	Non
Penner mut	h3c1	899.58	44.323	68.005	Non
Penner mut	h3c1	887.057	44.323	68.005	Non
Penner mut	h3c1	818.597	44.02	67.538	Non
Penner mut	h3c1	676.599	44.02	67.538	Non
Penner mut	h3c1	472.958	44.02	67.538	Non
Penner mut	h3c1	294.108	44.02	67.538	Non
Penner mut	h3c1	186.987	44.02	67.538	Non
Penner mut	h3c1	116.715	44.02	67.538	Non
Penner mut	h3c2	597.01	44.505	68.27	Non
Penner mut	h3c2	786.384	44.505	68.27	Non
Penner mut	h3c2	920.878	46.14	70.781	Non
Penner mut	h3c2	969.662	46.14	70.781	Non
Penner mut	h3c2	918.143	46.14	70.781	Non
Penner mut	h3c2	949.958	47.048	72.191	Non
Penner mut	h3c2	852.793	47.048	72.191	Non
Penner mut	h3c2	783.872	46.442	71.246	Non
Penner mut	h3c2	576.007	46.442	71.246	Non
Penner mut	h3c2	368.922	46.442	71.246	Non
Penner mut	h3c2	227.778	46.442	71.246	Non
Penner mut	h3c2	129.574	46.442	71.246	Non
Penner mut	h3c2	80.773	46.442	71.246	Non
Penner mut	h3c3	750.882	47.472	72.83	Non
Penner mut	h3c3	853.04	47.472	72.83	Non
Penner mut	h3c3	984.332	47.29	72.55	Non
Penner mut	h3c3	957.056	47.29	72.55	Non
Penner mut	h3c3	849.93	47.29	72.55	Non
Penner mut	h3c3	762.465	47.532	72.918	Non
Penner mut	h3c3	642.494	47.532	72.918	Non
Penner mut	h3c3	468.645	47.532	72.918	Non
Penner mut	h3c3	316.65	47.532	72.918	Non
Penner mut	h3c3	213.351	47.532	72.918	Non
Penner mut	h3c3	134.336	47.532	72.918	Non
Penner mut	h3c4	930.415	45.11	69.198	Non
Penner mut	h3c4	1010.895	45.11	69.198	Non
Penner mut	h3c4	1075.144	45.11	69.198	Non
Penner mut	h3c4	1098.806	45.11	69.198	Non
Penner mut	h3c4	1076.424	45.11	69.198	Non
Penner mut	h3c4	951.208	45.413	69.665	Non
Penner mut	h3c4	1021.033	45.413	69.658	Non
Penner mut	h3c4	750.41	45.413	69.658	Non
Penner mut	h3c4	512.088	45.413	69.658	Non
Penner mut	h3c4	294.31	45.413	69.658	Non
Penner mut	h3c4	174	45.413	69.658	Non
Penner mut	h3c4	112.802	45.413	69.658	Non
Penner mut	h3c4	72.181	45.413	69.658	Non
Penner mut	h3c4	48.51	45.413	69.658	Non
Penner mut	h4c1	498.282	36.633	56.18	Non
Penner mut	h4c1	672.064	37.844	58.035	Non
Penner mut	h4c1	714.734	39.419	60.459	Non
Penner mut	h4c1	657.638	39.419	60.459	Non
Penner mut	h4c1	458.89	39.297	60.281	Non
Penner mut	h4c1	204.906	39.297	60.281	Non
Penner mut	h4c1	91.301	39.297	60.281	Non
Penner mut	h4c1	51	39.297	60.281	Non
Penner mut	h4c2	637.828	37.844	58.041	Non
Penner mut	h4c2	742.46	37.844	58.041	Non
Penner mut	h4c2	890.751	40.387	61.927	Non
Penner mut	h4c2	780.243	40.387	61.927	Non
Penner mut	h4c2	533.088	40.387	61.927	Non
Penner mut	h4c2	265.266	40.387	61.927	Non
Penner mut	h4c2	121.688	40.387	61.927	Non
Penner mut	h4c2	57.89	40.387	61.927	Non
Penner mut	h4c3	700.71	42.567	65.303	Non
Penner mut	h4c3	751.039	42.567	65.303	Non
Penner mut	h4c3	979.464	33.908	52.006	Non
Penner mut	h4c3	946.39	33.908	52.006	Non
Penner mut	h4c3	711.681	33.908	52.006	Non
Penner mut	h4c3	345.37	33.908	52.006	Non
Penner mut	h4c3	151.192	33.908	52.006	Non
Penner mut	h4c3	86.364	33.908	52.006	Non
Penner mut	h4c4	795.247	41.417	63.517	Non
Penner mut	h4c4	925.604	41.417	63.517	Non
Penner mut	h4c4	1075.435	44.747	68.639	Non
Penner mut	h4c4	858.466	44.747	68.639	Non
Penner mut	h4c4	429.573	44.747	68.639	Non
Penner mut	h4c4	174.615	44.747	68.639	Non
Penner mut	h4c4	70.56	44.747	68.639	Non
Penner mut	h4c4	30.198	44.747	68.639	Non
Penner mut	h4c5	693.158	49.409	75.815	Non
Penner mut	h4c5	662.259	49.409	75.815	Non
Penner mut	h4c5	529.145	49.409	75.815	Non
Penner mut	h4c5	327.529	49.409	75.815	Non
Penner mut	h4c5	214.371	49.409	75.815	Non
Penner mut	h4c5	127.181	49.409	75.815	Non
Penner mut	h4c5	59.404	49.409	75.815	Non
Penner mut	h4c5	20.537	49.409	75.815	Non
Penner mut	h5c1	558.332	46.745	71.715	Non
Penner mut	h5c1	594.304	46.382	71.168	Non
Penner mut	h5c1	727.699	46.382	71.168	Non
Penner mut	h5c1	903.06	48.259	74.049	Non
Penner mut	h5c1	986.392	48.259	74.049	Non
Penner mut	h5c1	942.246	48.259	74.049	Non
Penner mut	h5c1	857.336	48.259	74.049	Non
Penner mut	h5c1	687.295	48.259	74.049	Non
Penner mut	h5c1	468.019	48.259	74.049	Non
Penner mut	h5c1	376.011	48.259	74.049	Non
Penner mut	h5c1	261.456	48.259	74.049	Non
Penner mut	h5c1	184.163	48.259	74.049	Non
Penner mut	h5c1	141.143	48.259	74.049	Non
Penner mut	h5c1	95.83	48.259	74.049	Non
Penner mut	h5c2	526.42	49.349	75.713	Non
Penner mut	h5c2	634.561	51.408	78.872	Non
Penner mut	h5c2	609.144	51.408	78.872	Non
Penner mut	h5c2	642.671	51.589	79.149	Non
Penner mut	h5c2	607.683	51.589	79.149	Non
Penner mut	h5c2	658.689	51.468	78.962	Non
Penner mut	h5c2	451.41	51.468	78.962	Non
Penner mut	h5c2	359.165	51.468	78.962	Non
Penner mut	h5c2	247.897	51.468	78.962	Non
Penner mut	h5c2	169.975	51.468	78.962	Non
Penner mut	h5c2	124.914	51.468	78.962	Non
Penner mut	h5c2	79.282	51.468	78.962	Non
Penner mut	h5c2	57.154	51.468	78.962	Non
Penner mut	h5c3	714.969	39.782	61.008	Non
Penner mut	h5c3	768.221	39.54	60.642	Non
Penner mut	h5c3	786.038	39.54	60.642	Non
Penner mut	h5c3	753.466	39.54	60.642	Non
Penner mut	h5c3	578.07	39.54	60.642	Non
Penner mut	h5c3	387.237	39.54	60.642	Non
Penner mut	h5c3	269.862	39.54	60.642	Non
Penner mut	h5c3	161.464	39.54	60.642	Non
Penner mut	h5c3	114.716	39.54	60.642	Non
Penner mut	h5c3	82.385	39.54	60.642	Non
Penner mut	h5c4	697.703	46.745	71.722	Non
Penner mut	h5c4	769.635	46.745	71.722	Non
Penner mut	h5c4	796.988	46.745	71.722	Non
Penner mut	h5c4	1160.82	39.903	61.221	Non
Penner mut	h5c4	1040.46	39.903	61.221	Non
Penner mut	h5c4	882.133	39.903	61.221	Non
Penner mut	h5c4	601.798	39.903	61.221	Non
Penner mut	h5c4	371.867	39.903	61.221	Non
Penner mut	h5c4	255.309	39.903	61.221	Non
Penner mut	h5c4	148.395	39.903	61.221	Non
Penner mut	h5c4	118.354	39.903	61.221	Non
Penner mut	h5c4	89.239	39.903	61.221	Non
Penner mut	h5c5	684.886	35.785	54.886	Non
Penner mut	h5c5	857.737	35.725	54.783	Non
Penner mut	h5c5	939.423	35.725	54.783	Non
Penner mut	h5c5	1133.053	36.028	55.249	Non
Penner mut	h5c5	1032.138	36.028	55.249	Non
Penner mut	h5c5	911.307	36.936	56.645	Non
Penner mut	h5c5	689.345	36.936	56.645	Non
Penner mut	h5c5	412.268	36.936	56.645	Non
Penner mut	h5c5	240.427	36.936	56.645	Non
Penner mut	h5c5	162.043	36.936	56.645	Non
Penner mut	h5c5	107.48	36.936	56.645	Non
Penner mut	h6c1	797.396	45.897	70.412	Non
Penner mut	h6c1	1023.274	45.897	70.412	Non
Penner mut	h6c1	1152.284	45.897	70.412	Non
Penner mut	h6c1	1203.599	45.897	70.412	Non
Penner mut	h6c1	1154.457	45.897	70.412	Non
Penner mut	h6c1	1011.822	45.897	70.412	Non
Penner mut	h6c1	726.298	45.897	70.412	Non
Penner mut	h6c1	831.549	46.079	70.679	Non
Penner mut	h6c1	524.588	46.079	70.679	Non
Penner mut	h6c1	336.627	46.079	70.679	Non
Penner mut	h6c1	206.734	46.079	70.679	Non
Penner mut	h6c1	118.436	46.079	70.679	Non
Penner mut	h6c1	80.359	46.079	70.679	Non
Penner mut	h6c2	581.794	43.294	66.418	Non
Penner mut	h6c2	748.132	43.415	66.604	Non
Penner mut	h6c2	797.486	43.415	66.604	Non
Penner mut	h6c2	831.164	43.415	66.604	Non
Penner mut	h6c2	906.928	44.263	67.907	Non
Penner mut	h6c2	870.817	44.263	67.907	Non
Penner mut	h6c2	677.559	44.263	67.907	Non
Penner mut	h6c2	426.598	44.263	67.907	Non
Penner mut	h6c2	263.193	44.263	67.907	Non
Penner mut	h6c2	177.579	44.263	67.907	Non
Penner mut	h6c2	114.535	44.263	67.907	Non
Penner mut	h6c2	78.743	44.263	67.907	Non
Penner mut	h6c3	450.104	45.353	69.567	Non
Penner mut	h6c3	510.606	45.353	69.567	Non
Penner mut	h6c3	595.159	45.353	69.567	Non
Penner mut	h6c3	716.445	46.866	71.897	Non
Penner mut	h6c3	764.369	46.866	71.897	Non
Penner mut	h6c3	809.896	46.866	71.897	Non
Penner mut	h6c3	843.975	46.866	71.897	Non
Penner mut	h6c3	706.971	46.866	71.897	Non
Penner mut	h6c3	568.444	46.866	71.897	Non
Penner mut	h6c3	450.39	46.866	71.897	Non
Penner mut	h6c3	318.638	46.866	71.897	Non
Penner mut	h6c3	224.714	46.866	71.897	Non
Penner mut	h6c3	157.23	46.866	71.897	Non
Penner mut	h6c4	568.041	53.042	81.378	Non
Penner mut	h6c4	650.667	53.042	81.378	Non
Penner mut	h6c4	768.997	54.072	82.952	Non
Penner mut	h6c4	891.47	54.072	82.952	Non
Penner mut	h6c4	992.153	53.345	81.865	Non
Penner mut	h6c4	1075.762	53.345	81.865	Non
Penner mut	h6c4	1155.066	53.345	81.865	Non
Penner mut	h6c4	1203.762	53.345	81.865	Non
Penner mut	h6c4	973.507	53.345	81.865	Non
Penner mut	h6c4	671.945	53.345	81.865	Non
Penner mut	h6c4	481.228	52.861	81.106	Non
Penner mut	h6c4	313.727	52.861	81.106	Non
Penner mut	h6c4	194.372	52.861	81.106	Non
Penner mut	h6c4	127.104	52.861	81.106	Non
Penner mut	h6c4	96.508	52.861	81.106	Non
Penner mut	h6c4	66.611	52.861	81.106	Non
Penner mut	h6c5	807.234	43.778	67.15	Non
Penner mut	h6c5	944	43.778	67.15	Non
Penner mut	h6c5	1021.597	43.778	67.15	Non
Penner mut	h6c5	1086.703	43.778	67.15	Non
Penner mut	h6c5	1205.653	44.747	68.641	Non
Penner mut	h6c5	1440.473	44.747	68.641	Non
Penner mut	h6c5	1492.57	44.747	68.641	Non
Penner mut	h6c5	1464.498	44.747	68.641	Non
Penner mut	h6c5	1339.725	44.747	68.641	Non
Penner mut	h6c5	1025.397	44.747	68.641	Non
Penner mut	h6c5	765.592	44.747	68.641	Non
Penner mut	h6c5	539.055	44.747	68.641	Non
Penner mut	h6c5	411.034	44.747	68.641	Non
Penner mut	h6c5	270.625	44.747	68.641	Non
Penner mut	h6c5	201.758	44.747	68.641	Non
Penner mut	h6c6	919.91	37.36	57.297	Non
Penner mut	h6c6	961.761	38.147	58.507	Non
Penner mut	h6c6	1002.007	38.147	58.507	Non
Penner mut	h6c6	1049.224	41.538	63.714	Non
Penner mut	h6c6	1053.264	41.296	63.352	Non
Penner mut	h6c6	976.845	41.296	63.352	Non
Penner mut	h6c6	835.529	42.446	65.104	Non
Penner mut	h6c6	678.724	42.446	65.104	Non
Penner mut	h6c6	620.804	41.175	63.152	Non
Penner mut	h6c6	477.233	41.175	63.152	Non
Penner mut	h6c6	427.069	41.175	63.152	Non
Penner mut	h6c6	384.71	41.175	63.152	Non
Penner mut	h6c6	340.6	41.175	63.152	Non
Penner mut	h6c6	276.683	41.175	63.152	Non
Penner mut	h6c6	214.136	41.175	63.152	Non
Penner mut	h6c6	147.463	41.175	63.152	Non
Penner mut	h6c6	107.6	41.175	63.152	Non
Penner mut	h7c1	616.169	42.567	65.292	Non
Penner mut	h7c1	757.842	42.567	65.285	Non
Penner mut	h7c1	829.844	44.384	68.085	Non
Penner mut	h7c1	781.75	44.384	68.085	Non
Penner mut	h7c1	947.803	45.474	69.761	Non
Penner mut	h7c1	884.968	45.474	69.761	Non
Penner mut	h7c1	766.575	45.474	69.761	Non
Penner mut	h7c1	646.644	45.474	69.761	Non
Penner mut	h7c1	476.671	45.474	69.761	Non
Penner mut	h7c1	340.51	45.474	69.761	Non
Penner mut	h7c1	217.097	45.474	69.761	Non
Penner mut	h7c1	128.233	45.474	69.761	Non
Penner mut	h7c2	790.595	44.202	67.809	Non
Penner mut	h7c2	840.047	44.202	67.809	Non
Penner mut	h7c2	835.253	44.202	67.809	Non
Penner mut	h7c2	824.384	43.597	66.878	Non
Penner mut	h7c2	740.301	43.597	66.878	Non
Penner mut	h7c2	632.953	43.597	66.878	Non
Penner mut	h7c2	527.472	43.597	66.878	Non
Penner mut	h7c2	447.426	43.597	66.878	Non
Penner mut	h7c2	338.771	43.597	66.878	Non
Penner mut	h7c2	225.016	43.597	66.878	Non
Penner mut	h7c2	154.323	43.597	66.878	Non
Penner mut	h7c2	88.453	43.597	66.878	Non
Penner mut	h7c3	569.678	46.685	71.599	Non
Penner mut	h7c3	667.639	46.685	71.599	Non
Penner mut	h7c3	622.391	50.802	77.95	Non
Penner mut	h7c3	629.445	50.802	77.95	Non
Penner mut	h7c3	608.468	50.802	77.95	Non
Penner mut	h7c3	548.923	50.802	77.95	Non
Penner mut	h7c3	460.534	50.802	77.95	Non
Penner mut	h7c3	361.895	50.802	77.95	Non
Penner mut	h7c3	268.286	50.802	77.95	Non
Penner mut	h7c3	192.782	50.802	77.95	Non
Penner mut	h7c3	129.336	50.802	77.95	Non
Penner mut	h7c4	815.706	38.329	58.79	Non
Penner mut	h7c4	919.796	38.329	58.79	Non
Penner mut	h7c4	1060.796	40.387	61.936	Non
Penner mut	h7c4	1160.148	40.387	61.936	Non
Penner mut	h7c4	1299.587	40.387	61.936	Non
Penner mut	h7c4	1239.719	40.387	61.936	Non
Penner mut	h7c4	1273.952	40.266	61.752	Non
Penner mut	h7c4	1060.919	40.266	61.752	Non
Penner mut	h7c4	742.032	40.266	61.752	Non
Penner mut	h7c4	450.507	40.266	61.752	Non
Penner mut	h7c4	296.903	40.266	61.752	Non
Penner mut	h7c4	187.282	40.266	61.752	Non
Penner mut	h7c4	115.506	40.266	61.752	Non
Penner mut	h7c6	718.539	44.808	68.733	Non
Penner mut	h7c6	833.298	44.808	68.733	Non
Penner mut	h7c6	858.257	46.927	71.983	Non
Penner mut	h7c6	987.869	46.927	71.983	Non
Penner mut	h7c6	1256.581	44.444	68.185	Non
Penner mut	h7c6	1212.481	44.444	68.185	Non
Penner mut	h7c6	1047.724	44.444	68.185	Non
Penner mut	h7c6	884.967	44.686	68.552	Non
Penner mut	h7c6	645.878	44.686	68.552	Non
Penner mut	h7c6	457.525	44.686	68.552	Non
Penner mut	h7c6	285.887	44.686	68.552	Non
Penner mut	h7c6	187.436	44.686	68.552	Non
Penner mut	h7c6	118.833	44.686	68.552	Non
[truncated: 100 more rows]
