# Supplementary material for: Stepwise polarisation of developing bilayered epidermis is mediated by aPKC and E-cadherin in zebrafish
Source: eLife. 2020 Jan 22;9:e49064. doi: 10.7554/eLife.49064 (PMC6975926; doi:10.7554/eLife.49064)
Supplement: Figure 4—figure supplement 2—source data 1. [file elife-49064-fig4-figsupp2-data1.csv]

Genotype	Boundary	Cell name	Area	Mean	Min	Max	Length
Ctrl MO C-C	Clone- Clone	h1b1	13.725	218.161	106.195	841.408	22.228
Ctrl MO C-C	Clone- Clone	h1b1	13.725	263.864	111.471	919.97	22.228
Ctrl MO C-C	Clone- Clone	h1b1	13.725	321.285	115.113	952.927	22.228
Ctrl MO C-C	Clone- Clone	h1b1	13.725	389.369	107.905	1501.861	22.228
Ctrl MO C-C	Clone- Clone	h1b1	13.725	429.618	121.287	1663.575	22.228
Ctrl MO C-C	Clone- Clone	h1b1	13.725	451.129	120.646	1617.165	22.228
Ctrl MO C-C	Clone- Clone	h1b1	13.725	481.159	126.872	1628.054	22.228
Ctrl MO C-C	Clone- Clone	h1b1	13.725	509.866	153.224	1647.837	22.228
Ctrl MO C-C	Clone- Clone	h1b1	13.725	448.263	147.813	1703.98	22.228
Ctrl MO C-C	Clone- Clone
Ctrl MO C-C	Clone- Clone	h1b2	9.78	172.337	104.2	352.039	15.815
Ctrl MO C-C	Clone- Clone	h1b2	9.78	201.272	109.095	516.314	15.815
Ctrl MO C-C	Clone- Clone	h1b2	9.78	228.477	101.774	772.982	15.815
Ctrl MO C-C	Clone- Clone	h1b2	9.78	285.976	106.513	1066.581	15.815
Ctrl MO C-C	Clone- Clone	h1b2	9.78	325.142	111.548	1610.3	15.815
Ctrl MO C-C	Clone- Clone	h1b2	9.78	327.86	114.881	1423.913	15.815
Ctrl MO C-C	Clone- Clone	h1b2	9.78	341.117	130.503	1191.771	15.815
Ctrl MO C-C	Clone- Clone	h1b2	9.78	387.644	119.36	1504.625	15.815
Ctrl MO C-C	Clone- Clone
Ctrl MO C-C	Clone- Clone	h1b3	9.51	179.824	102.735	346.166	15.375
Ctrl MO C-C	Clone- Clone	h1b3	9.51	214.344	102.566	478.469	15.375
Ctrl MO C-C	Clone- Clone	h1b3	9.51	257.076	111.169	650.027	15.375
Ctrl MO C-C	Clone- Clone	h1b3	9.51	311.527	115.961	975.193	15.375
Ctrl MO C-C	Clone- Clone	h1b3	9.51	371.214	112.901	1280.772	15.375
Ctrl MO C-C	Clone- Clone	h1b3	9.51	394.228	120.226	1523.738	15.375
Ctrl MO C-C	Clone- Clone	h1b3	9.51	379.002	120.255	1323.565	15.375
Ctrl MO C-C	Clone- Clone	h1b3	9.51	343.855	133.216	1229.685	15.375
Ctrl MO C-C	Clone- Clone	h1b3	9.51	287.962	117.602	1033.475	15.375
Ctrl MO C-C	Clone- Clone
Ctrl MO C-C	Clone- Clone	h2b1	9.348	238.204	109.833	591.674	15.112
Ctrl MO C-C	Clone- Clone	h2b1	9.348	318.73	119.717	989.426	15.112
Ctrl MO C-C	Clone- Clone	h2b1	9.348	384.846	123.857	1662.078	15.112
Ctrl MO C-C	Clone- Clone	h2b1	9.348	424.295	146.627	1803.621	15.112
Ctrl MO C-C	Clone- Clone	h2b1	9.348	427.764	131.117	1324.885	15.112
Ctrl MO C-C	Clone- Clone	h2b1	9.348	373.595	154.096	1023.503	15.112
Ctrl MO C-C	Clone- Clone
Ctrl MO C-C	Clone- Clone	h2b2	9.294	232.582	108.341	551.021	15.024
Ctrl MO C-C	Clone- Clone	h2b2	9.294	306.397	114.956	1040.214	15.024
Ctrl MO C-C	Clone- Clone	h2b2	9.294	367.45	130.92	1605.029	15.024
Ctrl MO C-C	Clone- Clone	h2b2	9.294	426.828	132.849	2008.052	15.024
Ctrl MO C-C	Clone- Clone	h2b2	9.294	492.744	145.13	2969.188	15.024
Ctrl MO C-C	Clone- Clone	h2b2	9.294	446.605	138.225	3906.558	15.024
Ctrl MO C-C	Clone- Clone
Ctrl MO C-C	Clone- Clone	h2b3	7.673	277.169	130.05	747.196	12.388
Ctrl MO C-C	Clone- Clone	h2b3	7.673	376.185	152.215	1392.131	12.388
Ctrl MO C-C	Clone- Clone	h2b3	7.673	452.52	175.186	1784.07	12.388
Ctrl MO C-C	Clone- Clone	h2b3	7.673	527.464	206.848	1984.525	12.388
Ctrl MO C-C	Clone- Clone	h2b3	7.673	620.309	189.442	1884.14	12.388
Ctrl MO C-C	Clone- Clone	h2b3	7.673	604.977	179.136	2248.1	12.388
Ctrl MO C-C	Clone- Clone
Ctrl MO C-C	Clone- Clone	h2b4	8.862	208.524	104.898	459.736	14.32
Ctrl MO C-C	Clone- Clone	h2b4	8.862	276.461	112.786	888.09	14.32
Ctrl MO C-C	Clone- Clone	h2b4	8.862	344.195	119.759	1239.191	14.32
Ctrl MO C-C	Clone- Clone	h2b4	8.862	407.43	129.082	1280.978	14.32
Ctrl MO C-C	Clone- Clone	h2b4	8.862	473.454	125.315	1306.677	14.32
Ctrl MO C-C	Clone- Clone	h2b4	8.862	476.853	131.231	2144.815	14.32
Ctrl MO C-C	Clone- Clone	h3b1	9.78	191.966	102.1	689.366	15.815
Ctrl MO C-C	Clone- Clone	h3b1	9.78	221.96	105.321	840.258	15.815
Ctrl MO C-C	Clone- Clone	h3b1	9.78	251.301	111.978	1009.372	15.815
Ctrl MO C-C	Clone- Clone	h3b1	9.78	272.597	107.788	1137.844	15.815
Ctrl MO C-C	Clone- Clone	h3b1	9.78	308.051	116.931	1302.552	15.815
Ctrl MO C-C	Clone- Clone	h3b1	9.78	360.266	122.639	1609.149	15.815
Ctrl MO C-C	Clone- Clone	h3b1	9.78	408.97	139.381	1707.59	15.815
Ctrl MO C-C	Clone- Clone	h3b1	9.78	423.403	137.979	1667.63	15.815
Ctrl MO C-C	Clone- Clone	h3b1	9.78	426.396	139.807	1401.098	15.815
Ctrl MO C-C	Clone- Clone	h4b1	8.7	184.062	99.392	648.102	14.057
Ctrl MO C-C	Clone- Clone	h4b1	8.7	198.611	98.546	675.672	14.057
Ctrl MO C-C	Clone- Clone	h4b1	8.7	211.541	97.86	648.057	14.057
Ctrl MO C-C	Clone- Clone	h4b1	8.7	223.197	98.497	1013.181	14.057
Ctrl MO C-C	Clone- Clone	h4b1	8.7	238.458	97.29	1117.689	14.057
Ctrl MO C-C	Clone- Clone	h4b1	8.7	246.634	99.445	840.582	14.057
Ctrl MO C-C	Clone- Clone	h4b1	8.7	248.054	104.921	819.751	14.057
Ctrl MO C-C	Clone- Clone	h4b1	8.7	245.574	109.705	797.977	14.057
Ctrl MO C-C	Clone- Clone	h4b1	8.7	240.624	111.586	728.606	14.057
Ctrl MO C-C	Clone- Clone
Ctrl MO C-C	Clone- Clone	h4b2	10.05	141.115	96.321	418.636	16.254
Ctrl MO C-C	Clone- Clone	h4b2	10.05	162.555	98.944	643.16	16.254
Ctrl MO C-C	Clone- Clone	h4b2	10.05	181.816	99.902	908.993	16.254
Ctrl MO C-C	Clone- Clone	h4b2	10.05	192.911	96.224	714.237	16.254
Ctrl MO C-C	Clone- Clone	h4b2	10.05	195.319	100.098	658.008	16.254
Ctrl MO C-C	Clone- Clone	h4b2	10.05	199.318	100.644	486.568	16.254
Ctrl MO C-C	Clone- Clone	h4b2	10.05	204.219	103.956	519.67	16.254
Ctrl MO C-C	Clone- Clone	h4b2	10.05	200.296	100.525	742.48	16.254
Ctrl MO C-C	Clone- Clone	h4b2	10.05	199.357	104.492	891.787	16.254
Ctrl MO C-C	Clone- Clone	h4b2	10.05	197.835	110.319	995.905	16.254
Ctrl MO C-C	Clone- Clone	h4b2	10.05	201.952	104.552	982.828	16.254
Ctrl MO C-C	Clone- Clone	h5b1	9.51	372.884	115.621	1108.489	15.375
Ctrl MO C-C	Clone- Clone	h5b1	9.51	389.475	124.079	1478.224	15.375
Ctrl MO C-C	Clone- Clone	h5b1	9.51	393.982	135.419	1877.426	15.375
Ctrl MO C-C	Clone- Clone	h5b1	9.51	385.938	120.714	1852.905	15.375
Ctrl MO C-C	Clone- Clone	h5b1	9.51	380.375	132.079	1829.215	15.375
Ctrl MO C-C	Clone- Clone	h5b1	9.51	341.828	123.827	1688.727	15.375
Ctrl MO C-C	Clone- Clone	h5b1	9.51	310.319	113.893	1595.257	15.375
Ctrl MO C-C	Clone- Clone
Ctrl MO C-C	Clone- Clone	h5b2	8.591	191.592	101.956	685.599	13.882
Ctrl MO C-C	Clone- Clone	h5b2	8.591	254.039	102.927	1249.519	13.882
Ctrl MO C-C	Clone- Clone	h5b2	8.591	278.077	101.832	1595.001	13.882
Ctrl MO C-C	Clone- Clone	h5b2	8.591	279.599	105.878	1197.839	13.882
Ctrl MO C-C	Clone- Clone	h5b2	8.591	281.748	103.492	1246.975	13.882
Ctrl MO C-C	Clone- Clone	h5b2	8.591	280.457	108.127	1329.121	13.882
Ctrl MO C-C	Clone- Clone	h5b2	8.591	265.715	103.405	1534.063	13.882
Ctrl MO C-C	Clone- Clone	h5b2	8.591	252.057	107.689	1218.777	13.882
Ctrl MO C-C	Clone- Clone	h5b2	8.591	244.523	111.918	894.028	13.882
Ctrl MO C-C	Clone- Clone	h5b2	8.591	239.078	110.307	729.169	13.882
Ctrl MO C-C	Clone- Clone	h5b2	8.591	243.271	109.4	700.4	13.882
Ctrl MO C-C	Clone- Clone	h5b2	8.591	251.234	110.183	992.269	13.882
Ctrl MO C-C	Clone- Clone
Ctrl MO C-C	Clone- Clone	h5b3	6.106	266.548	101.445	620.764	9.84
Ctrl MO C-C	Clone- Clone	h5b3	6.106	290.887	106.714	903.72	9.84
Ctrl MO C-C	Clone- Clone	h5b3	6.106	275.232	107.954	1352.16	9.84
Ctrl MO C-C	Clone- Clone	h5b3	6.052	372.539	134.924	1407.488	9.752
Ctrl MO C-C	Clone- Clone	h5b3	6.052	359.561	134.624	1436.072	9.752
Ctrl MO C-C	Clone- Clone	h5b3	6.052	322.241	126.569	1689.949	9.752
Ctrl MO C-C	Clone- Clone	h5b3	6.052	291.532	116.46	1113.477	9.752
Ctrl MO C-C	Clone- Clone	h5b3	6.052	273.916	118.576	1149.238	9.752
Ctrl MO C-C	Clone- Clone	h5b3	6.052	378.641	129.006	1315.61	9.752
Ctrl MO C-C	Clone- Clone	h5b3	6.052	400.147	132.741	1007.069	9.752
Ctrl MO C-C	Clone- Clone	h5b3	6.052	432.595	168.131	1015.548	9.752
Ctrl MO C-C	Clone- Clone	h5b3	6.052	466.905	160.02	1063.149	9.752
Ctrl MO C-C	Clone- Clone	h5b3	6.052	476.441	186.82	1267.706	9.752
Ctrl MO C-C	Clone- Clone	h5b3	6.052	462.987	157.875	1362.266	9.752
Ctrl MO N-C	Non Clone- Clone	h1b1	10.158	237.586	103.809	563.44	16.43
Ctrl MO N-C	Non Clone- Clone	h1b1	10.158	270.398	103.124	781.668	16.43
Ctrl MO N-C	Non Clone- Clone	h1b1	10.158	305.532	102.454	1124.583	16.43
Ctrl MO N-C	Non Clone- Clone	h1b1	10.158	304.398	103.803	1532.407	16.43
Ctrl MO N-C	Non Clone- Clone	h1b1	10.266	327.987	111.393	1284.356	16.605
Ctrl MO N-C	Non Clone- Clone	h1b1	10.266	356.225	125.418	968.726	16.605
Ctrl MO N-C	Non Clone- Clone	h1b1	10.266	375.627	128.598	1096.224	16.605
Ctrl MO N-C	Non Clone- Clone	h1b1	10.266	396.348	120.098	982.758	16.605
Ctrl MO N-C	Non Clone- Clone	h1b1	10.266	418.939	123.443	1479.434	16.605
Ctrl MO N-C	Non Clone- Clone
Ctrl MO N-C	Non Clone- Clone	h1b2	11.131	179.016	106.995	385.207	18.011
Ctrl MO N-C	Non Clone- Clone	h1b2	11.131	207.775	105.494	641.208	18.011
Ctrl MO N-C	Non Clone- Clone	h1b2	11.131	251.111	106.64	892.435	18.011
Ctrl MO N-C	Non Clone- Clone	h1b2	11.131	318.377	111.409	1198.107	18.011
Ctrl MO N-C	Non Clone- Clone	h1b2	11.131	369.655	127.083	1316.375	18.011
Ctrl MO N-C	Non Clone- Clone	h1b2	11.131	385.765	134.882	1437.151	18.011
Ctrl MO N-C	Non Clone- Clone	h1b2	11.131	395.551	140.053	1357.378	18.011
Ctrl MO N-C	Non Clone- Clone	h1b2	11.131	438.02	136.363	1630.721	18.011
Ctrl MO N-C	Non Clone- Clone	h1b2	11.131	494.917	139.012	1552.014	18.011
Ctrl MO N-C	Non Clone- Clone	h1b2	11.131	508.867	143.321	1748.642	18.011
Ctrl MO N-C	Non Clone- Clone
Ctrl MO N-C	Non Clone- Clone	h1b3	8.321	170.592	103.03	391.869	13.442
Ctrl MO N-C	Non Clone- Clone	h1b3	8.321	200.486	106.318	456.688	13.442
Ctrl MO N-C	Non Clone- Clone	h1b3	8.321	243	106.42	658.487	13.442
Ctrl MO N-C	Non Clone- Clone	h1b3	8.321	305.582	105.882	867.365	13.442
Ctrl MO N-C	Non Clone- Clone	h1b3	8.321	339.318	105.696	1231.597	13.442
Ctrl MO N-C	Non Clone- Clone	h1b3	8.321	332.909	119.716	1716.147	13.442
Ctrl MO N-C	Non Clone- Clone	h1b3	8.321	315.599	114.258	1780.822	13.442
Ctrl MO N-C	Non Clone- Clone	h1b3	8.321	283.855	116.348	1117.189	13.442
Ctrl MO N-C	Non Clone- Clone	h1b3	8.321	250.232	110.536	883.85	13.442
Ctrl MO N-C	Non Clone- Clone
Ctrl MO N-C	Non Clone- Clone	h1b4	5.728	207.724	108.414	423.826	9.225
Ctrl MO N-C	Non Clone- Clone	h1b4	5.728	243.507	115.714	510.033	9.225
Ctrl MO N-C	Non Clone- Clone	h1b4	5.728	293.349	122.288	694.631	9.225
Ctrl MO N-C	Non Clone- Clone	h1b4	5.728	363.455	133.368	1020.724	9.225
Ctrl MO N-C	Non Clone- Clone	h1b4	5.728	416.841	166.425	1205.139	9.225
Ctrl MO N-C	Non Clone- Clone	h1b4	5.728	428.81	148.539	1408.443	9.225
Ctrl MO N-C	Non Clone- Clone	h1b4	5.728	429.947	161.859	1613.115	9.225
Ctrl MO N-C	Non Clone- Clone	h1b4	5.728	409.005	146.946	1228.067	9.225
Ctrl MO N-C	Non Clone- Clone
Ctrl MO N-C	Non Clone- Clone	h1b5	8.808	192.46	112.072	340.73	14.233
Ctrl MO N-C	Non Clone- Clone	h1b5	8.808	229.764	117.587	434.593	14.233
Ctrl MO N-C	Non Clone- Clone	h1b5	8.808	278.196	128.457	603.635	14.233
Ctrl MO N-C	Non Clone- Clone	h1b5	8.808	357.572	125.294	961.659	14.233
Ctrl MO N-C	Non Clone- Clone	h1b5	8.808	418.726	154.269	1520.847	14.233
Ctrl MO N-C	Non Clone- Clone	h1b5	8.808	424.577	149.558	1343.53	14.233
Ctrl MO N-C	Non Clone- Clone	h1b5	8.808	414.338	151.062	1532.662	14.233
Ctrl MO N-C	Non Clone- Clone	h1b5	8.808	419.123	150.139	1087.121	14.233
Ctrl MO N-C	Non Clone- Clone	h1b5	8.808	434.357	167.212	1549.052	14.233
Ctrl MO N-C	Non Clone- Clone
Ctrl MO N-C	Non Clone- Clone	h1b6	6.268	181.406	109.164	360.477	10.104
Ctrl MO N-C	Non Clone- Clone	h1b6	6.268	217.522	104.61	487.859	10.104
Ctrl MO N-C	Non Clone- Clone	h1b6	6.268	285.598	104.942	845.106	10.104
Ctrl MO N-C	Non Clone- Clone	h1b6	6.268	351.518	113.642	1145.442	10.104
Ctrl MO N-C	Non Clone- Clone	h1b6	6.268	374.066	130.896	1251.69	10.104
Ctrl MO N-C	Non Clone- Clone	h1b6	6.268	379.6	144.335	1207.658	10.104
Ctrl MO N-C	Non Clone- Clone	h1b6	6.268	364.035	152.221	1432.075	10.104
Ctrl MO N-C	Non Clone- Clone	h1b6	6.484	388.76	113.753	1414.926	10.455
Ctrl MO N-C	Non Clone- Clone	h1b6	6.484	395.351	136.576	1380.74	10.455
Ctrl MO N-C	Non Clone- Clone
Ctrl MO N-C	Non Clone- Clone	h1b7	13.4	146.422	93.828	291.853	21.701
Ctrl MO N-C	Non Clone- Clone	h1b7	13.4	161.377	99.261	410.724	21.701
Ctrl MO N-C	Non Clone- Clone	h1b7	13.4	188.261	98.123	552.708	21.701
Ctrl MO N-C	Non Clone- Clone	h1b7	13.346	309.176	105.228	875.228	21.613
Ctrl MO N-C	Non Clone- Clone	h1b7	13.346	329.58	125.112	1112.728	21.613
Ctrl MO N-C	Non Clone- Clone	h1b7	13.346	316.382	111.87	1351.577	21.613
Ctrl MO N-C	Non Clone- Clone	h1b7	13.346	282.33	107.583	1633.812	21.613
Ctrl MO N-C	Non Clone- Clone	h1b7	13.346	286.311	109.125	1172.956	21.613
Ctrl MO N-C	Non Clone- Clone	h1b7	13.346	324.669	109.722	1220.918	21.613
Ctrl MO N-C	Non Clone- Clone	h1b7	13.346	368.495	106.422	1454.11	21.613
Ctrl MO N-C	Non Clone- Clone
Ctrl MO N-C	Non Clone- Clone	h1b8	9.834	166.624	106.944	319.048	15.902
Ctrl MO N-C	Non Clone- Clone	h1b8	9.834	212.672	104.155	507.801	15.902
Ctrl MO N-C	Non Clone- Clone	h1b8	9.834	282.768	108.372	727.412	15.902
Ctrl MO N-C	Non Clone- Clone	h1b8	9.834	356.169	119.031	1054.166	15.902
Ctrl MO N-C	Non Clone- Clone	h1b8	9.834	395.287	123.875	1319.374	15.902
Ctrl MO N-C	Non Clone- Clone	h1b8	9.834	433.93	168.45	1287.419	15.902
Ctrl MO N-C	Non Clone- Clone	h1b8	9.834	456.631	178.666	1324.274	15.902
Ctrl MO N-C	Non Clone- Clone	h1b8	9.834	456.026	148.252	1894.246	15.902
Ctrl MO N-C	Non Clone- Clone	h2b1	11.455	223.051	107.446	773.277	18.536
Ctrl MO N-C	Non Clone- Clone	h2b1	11.455	275.046	111.303	1406.513	18.536
Ctrl MO N-C	Non Clone- Clone	h2b1	11.455	306.981	115.165	1674.194	18.536
Ctrl MO N-C	Non Clone- Clone	h2b1	11.455	330.659	117.745	1537.124	18.536
Ctrl MO N-C	Non Clone- Clone	h2b1	11.455	364.252	128.451	1673.569	18.536
Ctrl MO N-C	Non Clone- Clone	h2b1	11.455	389.892	137.641	1698.235	18.536
Ctrl MO N-C	Non Clone- Clone
Ctrl MO N-C	Non Clone- Clone	h2b2	7.457	281.595	129.893	677.309	12.037
Ctrl MO N-C	Non Clone- Clone	h2b2	7.457	358.931	179.071	889.883	12.037
Ctrl MO N-C	Non Clone- Clone	h2b2	7.457	398.779	189.184	913.299	12.037
Ctrl MO N-C	Non Clone- Clone	h2b2	7.457	435.421	186.797	988.322	12.037
Ctrl MO N-C	Non Clone- Clone	h2b2	7.457	501.011	163.419	1473.599	12.037
Ctrl MO N-C	Non Clone- Clone	h2b2	7.457	506.294	185.975	1111.262	12.037
Ctrl MO N-C	Non Clone- Clone
Ctrl MO N-C	Non Clone- Clone	h2b3	8.808	280.794	115.829	1191.171	14.233
Ctrl MO N-C	Non Clone- Clone	h2b3	8.808	359.589	119.253	1812.886	14.233
Ctrl MO N-C	Non Clone- Clone	h2b3	8.808	394.763	130.605	2077.673	14.233
Ctrl MO N-C	Non Clone- Clone	h2b3	8.808	416.752	149.339	1831.695	14.233
Ctrl MO N-C	Non Clone- Clone	h2b3	8.808	444.675	167.825	2327.048	14.233
Ctrl MO N-C	Non Clone- Clone	h2b3	8.808	478.317	160.957	3431.495	14.233
Ctrl MO N-C	Non Clone- Clone
Ctrl MO N-C	Non Clone- Clone	h2b4	8.321	252.737	121.264	572.418	13.44
Ctrl MO N-C	Non Clone- Clone	h2b4	8.321	324.301	132.279	968.052	13.44
Ctrl MO N-C	Non Clone- Clone	h2b4	8.321	377.138	136.983	1508.907	13.44
Ctrl MO N-C	Non Clone- Clone	h2b4	8.321	411.223	144.093	1580.484	13.44
Ctrl MO N-C	Non Clone- Clone	h2b4	8.321	473.844	175.77	1125.502	13.44
Ctrl MO N-C	Non Clone- Clone	h2b4	8.321	469.76	189.499	1163.243	13.44
Ctrl MO N-C	Non Clone- Clone
Ctrl MO N-C	Non Clone- Clone	h2b5	9.294	243.366	114.994	575.715	15.024
Ctrl MO N-C	Non Clone- Clone	h2b5	9.294	327.848	121.577	1165.734	15.024
Ctrl MO N-C	Non Clone- Clone	h2b5	9.294	403.173	135.978	1768.954	15.024
Ctrl MO N-C	Non Clone- Clone	h2b5	9.294	467.01	155.502	2172.429	15.024
Ctrl MO N-C	Non Clone- Clone	h2b5	9.294	530.689	172.135	1596.208	15.024
Ctrl MO N-C	Non Clone- Clone	h2b5	9.294	522.319	157.057	1845.529	15.024
Ctrl MO N-C	Non Clone- Clone	h2b5	9.294	454.117	153.663	1749.156	15.024
Ctrl MO N-C	Non Clone- Clone
Ctrl MO N-C	Non Clone- Clone	h2b6	8.7	203.276	117.469	545.965	14.057
Ctrl MO N-C	Non Clone- Clone	h2b6	8.7	274.519	133.2	989.437	14.057
Ctrl MO N-C	Non Clone- Clone	h2b6	8.7	347.454	131.504	1860.797	14.057
Ctrl MO N-C	Non Clone- Clone	h2b6	8.7	423.44	153.679	2628.433	14.057
Ctrl MO N-C	Non Clone- Clone	h2b6	8.7	509.328	194.667	2871.155	14.057
Ctrl MO N-C	Non Clone- Clone	h2b6	8.7	548.653	188.762	3917.085	14.057
Ctrl MO N-C	Non Clone- Clone	h2b6	8.7	499.821	190.648	2887.106	14.057
Ctrl MO N-C	Non Clone- Clone
Ctrl MO N-C	Non Clone- Clone	h2b7	11.131	205.75	107.477	848.043	18.011
Ctrl MO N-C	Non Clone- Clone	h2b7	11.131	255.125	113.041	1435.194	18.011
Ctrl MO N-C	Non Clone- Clone	h2b7	11.131	315.853	121.771	2427.161	18.011
Ctrl MO N-C	Non Clone- Clone	h2b7	11.131	372.778	140.959	2314.01	18.011
Ctrl MO N-C	Non Clone- Clone	h2b7	11.131	391.961	138.934	1533.398	18.011
Ctrl MO N-C	Non Clone- Clone	h2b7	11.131	385.626	118.528	1390.336	18.011
Ctrl MO N-C	Non Clone- Clone
Ctrl MO N-C	Non Clone- Clone	h2b8	12.428	215.297	103.881	732.192	20.12
Ctrl MO N-C	Non Clone- Clone	h2b8	12.428	273.174	117.038	1123.943	20.12
Ctrl MO N-C	Non Clone- Clone	h2b8	12.428	331.475	120.593	1648.351	20.12
Ctrl MO N-C	Non Clone- Clone	h2b8	12.428	373.923	143.954	1811.967	20.12
Ctrl MO N-C	Non Clone- Clone	h2b8	12.428	387.563	141.118	1553.43	20.12
Ctrl MO N-C	Non Clone- Clone	h2b8	12.428	379.778	129.883	2241.428	20.12
Ctrl MO N-C	Non Clone- Clone	h3b1	12.59	163.58	101.109	452.822	20.383
Ctrl MO N-C	Non Clone- Clone	h3b1	12.59	173.704	101.259	493.624	20.383
Ctrl MO N-C	Non Clone- Clone	h3b1	12.59	189.684	104.167	517.595	20.383
Ctrl MO N-C	Non Clone- Clone	h3b1	12.59	224.043	108.536	533.293	20.383
Ctrl MO N-C	Non Clone- Clone	h3b1	12.59	257.503	109.756	704.696	20.383
Ctrl MO N-C	Non Clone- Clone	h3b1	12.59	278.085	122.663	843.516	20.383
Ctrl MO N-C	Non Clone- Clone	h3b1	12.59	296.455	123.811	988.449	20.383
Ctrl MO N-C	Non Clone- Clone	h3b1	12.59	320.194	125.058	1125.842	20.383
Ctrl MO N-C	Non Clone- Clone	h3b1	12.59	310.971	119.892	1558.892	20.383
Ctrl MO N-C	Non Clone- Clone	h3b1	12.59	299.353	114.575	1266.514	20.383
Ctrl MO N-C	Non Clone- Clone	h3b1	12.59	281.874	113.257	1119.72	20.383
Ctrl MO N-C	Non Clone- Clone
Ctrl MO N-C	Non Clone- Clone	h3b2	10.699	164.93	94.62	659.835	17.308
Ctrl MO N-C	Non Clone- Clone	h3b2	10.699	198.15	98.555	929.157	17.308
Ctrl MO N-C	Non Clone- Clone	h3b2	10.699	216.374	99.041	1134.64	17.308
Ctrl MO N-C	Non Clone- Clone	h3b2	10.699	235.312	99.802	1175.614	17.308
Ctrl MO N-C	Non Clone- Clone	h3b2	10.699	245.295	95.813	1216.328	17.308
Ctrl MO N-C	Non Clone- Clone	h3b2	10.699	269.16	98.308	1239.468	17.308
Ctrl MO N-C	Non Clone- Clone	h3b2	10.699	287.398	96.25	1365.562	17.308
Ctrl MO N-C	Non Clone- Clone	h3b2	10.699	310.086	101.203	1613.461	17.308
Ctrl MO N-C	Non Clone- Clone	h3b2	10.699	344.85	97.61	1594.393	17.308
Ctrl MO N-C	Non Clone- Clone	h3b2	10.699	368.737	101.746	1958.987	17.308
Ctrl MO N-C	Non Clone- Clone	h3b2	10.699	382.456	101.028	2517.108	17.308
Ctrl MO N-C	Non Clone- Clone
Ctrl MO N-C	Non Clone- Clone	h3b3	10.05	185.348	100.852	651.174	16.254
Ctrl MO N-C	Non Clone- Clone	h3b3	10.05	225.189	103.346	897.886	16.254
Ctrl MO N-C	Non Clone- Clone	h3b3	10.05	237.817	104.633	1081.14	16.254
Ctrl MO N-C	Non Clone- Clone	h3b3	10.05	241.318	102.009	1342.606	16.254
Ctrl MO N-C	Non Clone- Clone	h3b3	10.05	241.642	104.333	1235.793	16.254
Ctrl MO N-C	Non Clone- Clone	h3b3	10.05	251.329	107.679	1295.651	16.254
Ctrl MO N-C	Non Clone- Clone	h3b3	10.321	290.246	105.507	997.077	16.693
Ctrl MO N-C	Non Clone- Clone	h3b3	10.321	314.382	105.547	1143.995	16.693
Ctrl MO N-C	Non Clone- Clone	h3b3	10.321	327.535	108.179	1261.138	16.693
Ctrl MO N-C	Non Clone- Clone	h3b3	10.321	323.69	110.835	1389.39	16.693
Ctrl MO N-C	Non Clone- Clone	h3b3	10.321	318.236	117.053	1227.767	16.693
Ctrl MO N-C	Non Clone- Clone	h3b3	10.321	313.855	115.978	1300.116	16.693
Ctrl MO N-C	Non Clone- Clone
Ctrl MO N-C	Non Clone- Clone	h3b4	10.699	190.461	95.863	1062.158	17.308
Ctrl MO N-C	Non Clone- Clone	h3b4	10.699	187.046	98.859	954.995	17.308
Ctrl MO N-C	Non Clone- Clone	h3b4	10.699	192.025	99.025	1183.234	17.308
Ctrl MO N-C	Non Clone- Clone	h3b4	10.699	205.453	99.899	1032.351	17.308
Ctrl MO N-C	Non Clone- Clone	h3b4	10.699	213.687	99.227	858.019	17.308
Ctrl MO N-C	Non Clone- Clone	h3b4	10.699	207.233	100.449	710.867	17.308
Ctrl MO N-C	Non Clone- Clone	h3b4	10.699	212.952	98.834	613.695	17.308
Ctrl MO N-C	Non Clone- Clone	h3b4	10.699	223.377	98.153	824.103	17.308
Ctrl MO N-C	Non Clone- Clone	h3b4	10.699	229.657	103.638	875.4	17.308
Ctrl MO N-C	Non Clone- Clone	h3b4	10.699	230.64	99.536	903.236	17.308
Ctrl MO N-C	Non Clone- Clone
Ctrl MO N-C	Non Clone- Clone	h3b5	12.752	177.671	98.034	653.293	20.647
Ctrl MO N-C	Non Clone- Clone	h3b5	12.752	198.591	98.22	705.434	20.647
Ctrl MO N-C	Non Clone- Clone	h3b5	12.752	221.731	98.957	771.956	20.647
Ctrl MO N-C	Non Clone- Clone	h3b5	12.752	240.373	100.18	921.581	20.647
Ctrl MO N-C	Non Clone- Clone	h3b5	12.752	268.247	104.77	955.148	20.647
Ctrl MO N-C	Non Clone- Clone	h3b5	12.752	287.35	100.466	1235.537	20.647
Ctrl MO N-C	Non Clone- Clone	h3b5	12.752	302.765	106	1211.177	20.647
Ctrl MO N-C	Non Clone- Clone	h3b5	12.752	319.907	108.819	1231.517	20.647
Ctrl MO N-C	Non Clone- Clone	h3b5	12.752	343.8	112.452	1298.896	20.647
Ctrl MO N-C	Non Clone- Clone	h3b5	12.752	343.547	116.571	1270.212	20.647
Ctrl MO N-C	Non Clone- Clone	h3b5	12.752	340.381	116.96	1395.469	20.647
Ctrl MO N-C	Non Clone- Clone
Ctrl MO N-C	Non Clone- Clone	h3b6	7.241	179.394	101.681	833.051	11.685
Ctrl MO N-C	Non Clone- Clone	h3b6	7.241	196.578	101.88	691.257	11.685
Ctrl MO N-C	Non Clone- Clone	h3b6	7.241	213.124	109.615	796.952	11.685
Ctrl MO N-C	Non Clone- Clone	h3b6	7.241	232.329	112.814	643.36	11.685
Ctrl MO N-C	Non Clone- Clone	h3b6	7.241	272.136	118.46	921.807	11.685
Ctrl MO N-C	Non Clone- Clone	h3b6	7.241	331.512	115.319	1036.998	11.685
Ctrl MO N-C	Non Clone- Clone	h3b6	7.241	373.62	117.162	1188.341	11.685
Ctrl MO N-C	Non Clone- Clone	h3b6	7.241	383.674	129.759	1498.832	11.685
Ctrl MO N-C	Non Clone- Clone
Ctrl MO N-C	Non Clone- Clone	h3b7	10.212	185.38	100.57	1019.247	16.517
Ctrl MO N-C	Non Clone- Clone	h3b7	10.212	220.014	100.637	962.591	16.517
Ctrl MO N-C	Non Clone- Clone	h3b7	10.212	263.49	100.77	1123.941	16.517
Ctrl MO N-C	Non Clone- Clone	h3b7	10.212	293.158	114.618	1146.129	16.517
Ctrl MO N-C	Non Clone- Clone	h3b7	10.212	307.444	128.652	1562.805	16.517
Ctrl MO N-C	Non Clone- Clone	h3b7	10.212	320.059	114.729	1717.46	16.517
Ctrl MO N-C	Non Clone- Clone	h3b7	10.212	339.908	123.937	1252.781	16.517
Ctrl MO N-C	Non Clone- Clone	h3b7	10.212	318.725	106.216	1252.889	16.517
Ctrl MO N-C	Non Clone- Clone	h4b1	8.754	124.065	100.025	258.506	14.145
Ctrl MO N-C	Non Clone- Clone	h4b1	8.754	133.772	99.454	297.433	14.145
Ctrl MO N-C	Non Clone- Clone	h4b1	8.754	147.338	101.036	506.597	14.145
Ctrl MO N-C	Non Clone- Clone	h4b1	8.754	160.323	98.735	709.124	14.145
Ctrl MO N-C	Non Clone- Clone	h4b1	8.754	171.601	98.792	726.14	14.145
Ctrl MO N-C	Non Clone- Clone	h4b1	8.754	182.304	100.399	1087.918	14.145
Ctrl MO N-C	Non Clone- Clone	h4b1	8.754	198.229	103.883	1059.04	14.145
Ctrl MO N-C	Non Clone- Clone	h4b1	8.754	208.622	101.258	868.183	14.145
Ctrl MO N-C	Non Clone- Clone
Ctrl MO N-C	Non Clone- Clone	h4b2	8.375	204.442	104.306	659.646	13.53
Ctrl MO N-C	Non Clone- Clone	h4b2	8.375	231.104	103.034	785.014	13.53
Ctrl MO N-C	Non Clone- Clone	h4b2	8.375	240.672	103.544	829.326	13.53
Ctrl MO N-C	Non Clone- Clone	h4b2	8.375	251.622	114.231	890.62	13.53
Ctrl MO N-C	Non Clone- Clone	h4b2	8.375	254.602	106.227	893.202	13.53
Ctrl MO N-C	Non Clone- Clone	h4b2	8.375	254.482	102.159	796.786	13.53
Ctrl MO N-C	Non Clone- Clone	h4b2	8.375	265.312	107.634	870.457	13.53
Ctrl MO N-C	Non Clone- Clone	h4b2	8.375	275.829	105.35	907.106	13.53
Ctrl MO N-C	Non Clone- Clone	h4b2	8.375	287.506	99.508	995.487	13.53
Ctrl MO N-C	Non Clone- Clone
Ctrl MO N-C	Non Clone- Clone	h4b3	8.375	139.113	97.508	503.611	13.53
Ctrl MO N-C	Non Clone- Clone	h4b3	8.375	145.292	100.126	552.409	13.53
Ctrl MO N-C	Non Clone- Clone	h4b3	8.375	155.713	99.304	584.838	13.53
Ctrl MO N-C	Non Clone- Clone	h4b3	8.375	168.47	101.576	487.947	13.53
Ctrl MO N-C	Non Clone- Clone	h4b3	8.375	183.808	103.955	537.253	13.53
Ctrl MO N-C	Non Clone- Clone	h4b3	8.375	196.011	105.099	604.03	13.53
Ctrl MO N-C	Non Clone- Clone	h4b3	8.375	210.34	103.372	684.152	13.53
Ctrl MO N-C	Non Clone- Clone	h4b3	8.375	233.453	110.424	601.879	13.53
Ctrl MO N-C	Non Clone- Clone	h4b3	8.375	250.036	113.244	665.427	13.53
Ctrl MO N-C	Non Clone- Clone
Ctrl MO N-C	Non Clone- Clone	h4b4	10.483	306.395	99.097	1987.2	16.955
Ctrl MO N-C	Non Clone- Clone	h4b4	10.483	321.631	97.391	2206.445	16.955
Ctrl MO N-C	Non Clone- Clone	h4b4	10.483	316.393	101.986	1150.031	16.955
Ctrl MO N-C	Non Clone- Clone	h4b4	10.483	303.207	106.262	1082.301	16.955
Ctrl MO N-C	Non Clone- Clone	h4b4	10.483	286.815	103.585	980.578	16.955
Ctrl MO N-C	Non Clone- Clone	h4b4	10.483	280.229	106.846	882.449	16.955
Ctrl MO N-C	Non Clone- Clone	h4b4	10.483	260.344	107.991	712.229	16.955
Ctrl MO N-C	Non Clone- Clone	h5b4	8.375	265.856	106.997	702.298	13.53
Ctrl MO N-C	Non Clone- Clone	h5b4	8.375	328.239	116.585	816.967	13.53
Ctrl MO N-C	Non Clone- Clone	h5b4	8.375	348.38	120.529	899.308	13.53
Ctrl MO N-C	Non Clone- Clone	h5b4	8.375	361.524	120.88	1021.412	13.53
Ctrl MO N-C	Non Clone- Clone	h5b4	8.375	366.823	124.917	1059.932	13.53
Ctrl MO N-C	Non Clone- Clone	h5b4	8.375	352.985	121.568	913.531	13.53
Ctrl MO N-C	Non Clone- Clone	h5b4	8.808	389.449	114.728	1865.288	14.233
Ctrl MO N-C	Non Clone- Clone	h5b4	8.808	370.53	113.778	1636.911	14.233
Ctrl MO N-C	Non Clone- Clone	h5b4	8.808	350.28	111.708	1579.69	14.233
Ctrl MO N-C	Non Clone- Clone	h5b4	8.808	316.799	116.318	1340.492	14.233
Ctrl MO N-C	Non Clone- Clone	h5b4	8.808	291.253	108.621	993.243	14.233
Ctrl MO N-C	Non Clone- Clone	h5b4	8.808	282.873	124.197	977.926	14.233
Ctrl MO N-C	Non Clone- Clone	h5b4	8.808	284.964	111.413	967.697	14.233
Ctrl MO N-C	Non Clone- Clone
Ctrl MO N-C	Non Clone- Clone	h5b5	16.318	245.236	103.212	610.281	26.445
Ctrl MO N-C	Non Clone- Clone	h5b5	16.318	249.877	104.097	663.14	26.445
Ctrl MO N-C	Non Clone- Clone	h5b5	16.318	249.769	111.503	736.242	26.445
Ctrl MO N-C	Non Clone- Clone	h5b5	16.318	250.818	106.724	900.076	26.445
Ctrl MO N-C	Non Clone- Clone	h5b5	16.318	253.208	105.525	851.262	26.445
Ctrl MO N-C	Non Clone- Clone	h5b5	16.318	282.959	115.59	825.131	26.445
Ctrl MO N-C	Non Clone- Clone	h5b5	16.318	287.662	114.614	921.985	26.445
Ctrl MO N-C	Non Clone- Clone	h5b5	16.318	283.552	93.955	1042.385	26.445
Ctrl MO N-C	Non Clone- Clone	h5b5	16.318	277.369	117.009	824.56	26.445
Ctrl MO N-C	Non Clone- Clone	h5b5	16.318	267.575	105.712	848.639	26.445
Ctrl MO N-C	Non Clone- Clone	h5b5	16.643	282.239	121.03	771.657	26.973
Ctrl MO N-C	Non Clone- Clone	h5b5	16.643	294.507	124.043	863.254	26.973
Ctrl MO N-C	Non Clone- Clone	h5b5	16.643	320.433	120.081	950.362	26.973
Ctrl MO N-C	Non Clone- Clone	h5b5	16.643	352.845	122.049	1465.065	26.973
Ctrl MO N-C	Non Clone- Clone
Ctrl MO N-C	Non Clone- Clone	h5b6	6.7	197.097	105.124	1017.782	10.807
Ctrl MO N-C	Non Clone- Clone	h5b6	6.7	245.243	101.429	1530.293	10.807
Ctrl MO N-C	Non Clone- Clone	h5b6	6.7	278.096	106.131	1806.898	10.807
Ctrl MO N-C	Non Clone- Clone	h5b6	6.7	289.318	111.799	1711.445	10.807
Ctrl MO N-C	Non Clone- Clone	h5b6	6.7	304.698	118.548	1401.517	10.807
Ctrl MO N-C	Non Clone- Clone	h5b6	6.7	321.753	129.017	1136.443	10.807
Ctrl MO N-C	Non Clone- Clone	h5b6	6.7	337.607	120.122	1126.13	10.807
Ctrl MO N-C	Non Clone- Clone	h5b6	6.7	350.17	114.348	1108.114	10.807
Ctrl MO N-C	Non Clone- Clone	h5b6	6.7	371.257	122.803	960.104	10.807
Ctrl MO N-C	Non Clone- Clone	h5b6	6.7	389.188	130.185	1257.754	10.807
Ctrl MO N-C	Non Clone- Clone	h5b6	6.7	387.009	122.952	1151.309	10.807
Ctrl MO N-C	Non Clone- Clone
Ctrl MO N-C	Non Clone- Clone	h5b7	12.536	286.169	119.275	1010.829	20.295
Ctrl MO N-C	Non Clone- Clone	h5b7	12.536	326.758	130.451	1498.058	20.295
Ctrl MO N-C	Non Clone- Clone	h5b7	12.536	336.757	138.491	1925.007	20.295
Ctrl MO N-C	Non Clone- Clone	h5b7	12.536	334.048	125.492	1721.601	20.295
Ctrl MO N-C	Non Clone- Clone	h5b7	12.536	314.109	127.188	1591.054	20.295
Ctrl MO N-C	Non Clone- Clone	h5b7	12.536	283.638	123.563	1318.377	20.295
Ctrl MO N-C	Non Clone- Clone	h5b7	11.563	343.055	124.722	1463.423	18.714
Ctrl MO N-C	Non Clone- Clone	h5b7	11.563	406.462	126.279	1703.355	18.714
Ctrl MO N-C	Non Clone- Clone	h5b7	11.563	487.225	114.564	2586.16	18.714
Ctrl MO N-C	Non Clone- Clone	h5b7	11.563	496.377	113.777	2926.67	18.714
Ctrl MO N-C	Non Clone- Clone	h5b7	11.563	441.252	131.611	2563.321	18.714
Ctrl MO N-C	Non Clone- Clone
Ctrl MO N-C	Non Clone- Clone	h5b8	9.996	300.053	100.294	1492.346	16.166
Ctrl MO N-C	Non Clone- Clone	h5b8	9.996	338.428	121.486	1417.617	16.166
Ctrl MO N-C	Non Clone- Clone	h5b8	9.996	364.613	130.849	1688.15	16.166
Ctrl MO N-C	Non Clone- Clone	h5b8	9.996	390.543	122.702	1466.524	16.166
Ctrl MO N-C	Non Clone- Clone	h5b8	9.996	387.393	117.793	1317.067	16.166
Ctrl MO N-C	Non Clone- Clone	h5b8	9.996	379.442	119.417	1290.839	16.166
Ctrl MO N-C	Non Clone- Clone	h5b8	9.996	358.997	122.475	1385.6	16.166
Ctrl MO N-C	Non Clone- Clone	h5b8	9.996	341.331	128.478	1524.229	16.166
Ctrl MO N-C	Non Clone- Clone	h5b8	9.996	342.917	122.888	1561.596	16.166
Ctrl MO N-C	Non Clone- Clone	h5b8	9.996	357.371	120.008	1496.648	16.166
Ctrl MO N-C	Non Clone- Clone
Ctrl MO N-C	Non Clone- Clone	h5b9	9.402	269.226	115.221	698.568	15.2
Ctrl MO N-C	Non Clone- Clone	h5b9	9.402	289.198	113.649	608.443	15.2
Ctrl MO N-C	Non Clone- Clone	h5b9	9.402	298.056	125.421	710.687	15.2
Ctrl MO N-C	Non Clone- Clone	h5b9	9.402	283.759	121.169	803.88	15.2
Ctrl MO N-C	Non Clone- Clone	h5b9	9.402	289.31	116.533	1028.141	15.2
Ctrl MO N-C	Non Clone- Clone	h5b9	9.402	287.747	110.909	1153.444	15.2
Ctrl MO N-C	Non Clone- Clone	h5b9	9.402	291.202	102.145	1427.053	15.2
Ctrl MO N-C	Non Clone- Clone	h5b9	9.402	295.727	115.814	1290.958	15.2
Ctrl MO N-C	Non Clone- Clone	h5b9	9.402	296.625	117.591	1135.585	15.2
Ctrl MO N-C	Non Clone- Clone	h5b9	9.402	304.777	116.6	948.491	15.2
Ctrl MO N-C	Non Clone- Clone	h5b9	9.402	310.124	119.233	754.861	15.2
Ctrl MO N-C	Non Clone- Clone
Ctrl MO N-C	Non Clone- Clone	h5b10	7.727	253.502	122.668	951.33	12.469
Ctrl MO N-C	Non Clone- Clone	h5b10	7.727	282.2	112.89	1163.128	12.469
Ctrl MO N-C	Non Clone- Clone	h5b10	7.727	327.367	127.494	1275.484	12.469
Ctrl MO N-C	Non Clone- Clone	h5b10	7.727	349.806	142.575	1288.146	12.469
Ctrl MO N-C	Non Clone- Clone	h5b10	7.727	348.734	133.089	1398.367	12.469
Ctrl MO N-C	Non Clone- Clone	h5b10	7.727	341.487	127.385	1324.121	12.469
Ctrl MO N-C	Non Clone- Clone	h5b10	7.727	340.687	131.701	1149.554	12.469
Ctrl MO N-C	Non Clone- Clone	h5b10	6.97	369.63	122.057	1017.434	11.246
Ctrl MO N-C	Non Clone- Clone	h5b10	6.97	370.623	151.969	981.203	11.246
Ctrl MO N-C	Non Clone- Clone	h5b10	6.97	363.567	164.757	1243.791	11.246
Ctrl MO N-C	Non Clone- Clone	h5b10	6.97	347.435	133.064	1302.129	11.246
Ctrl MO N-C	Non Clone- Clone
Ctrl MO N-C	Non Clone- Clone	h5b11	9.294	283.327	104.879	1276.82	15.024
Ctrl MO N-C	Non Clone- Clone	h5b11	9.294	309.139	106.233	1624.857	15.024
Ctrl MO N-C	Non Clone- Clone	h5b11	9.294	311.581	121.51	1376.658	15.024
Ctrl MO N-C	Non Clone- Clone	h5b11	9.294	307.594	105.445	1434.425	15.024
Ctrl MO N-C	Non Clone- Clone	h5b11	9.294	308.781	123.598	1624.477	15.024
Ctrl MO N-C	Non Clone- Clone	h5b11	9.294	297.246	123.305	1725.401	15.024
Ctrl MO N-C	Non Clone- Clone	h5b11	9.294	274.962	115.583	1396.95	15.024
Ctrl MO N-C	Non Clone- Clone	h5b11	9.294	265.785	111.153	1096.74	15.024
Ctrl MO N-C	Non Clone- Clone	h5b11	9.294	255.051	106.944	887.111	15.024
Ctrl MO N-C	Non Clone- Clone	h5b11	9.294	250.919	117.365	747.883	15.024
Ctrl MO N-C	Non Clone- Clone	h5b11	9.294	252.778	115.18	714.062	15.024
Ctrl MO N-C	Non Clone- Clone
Ctrl MO N-C	Non Clone- Clone	h5b12	7.457	322.189	123.919	1828.723	12.036
Ctrl MO N-C	Non Clone- Clone	h5b12	7.457	329.173	117.09	1997.52	12.036
Ctrl MO N-C	Non Clone- Clone	h5b12	7.457	330.839	129.189	2068.882	12.036
Ctrl MO N-C	Non Clone- Clone	h5b12	7.457	340.414	125.964	1754.433	12.036
Ctrl MO N-C	Non Clone- Clone	h5b12	7.457	349.834	124.776	1604.59	12.036
Ctrl MO N-C	Non Clone- Clone	h5b12	7.457	349.444	118.611	1366.177	12.036
Ctrl MO N-C	Non Clone- Clone	h5b12	7.457	343.01	133.358	1163.037	12.036
Ctrl MO N-C	Non Clone- Clone	h5b12	7.457	341.758	117.422	961.862	12.036
Ctrl MO N-C	Non Clone- Clone	h5b12	7.457	349.187	128.154	1197.029	12.036
Ctrl MO N-C	Non Clone- Clone	h5b12	7.457	350.547	118.909	1038.176	12.036
Ctrl MO N-C	Non Clone- Clone	h5b12	7.457	349.146	126.446	850.718	12.036
Ctrl MO N-C	Non Clone- Clone
Ctrl MO N-C	Non Clone- Clone	h5b13	10.753	318.701	111.562	1507.744	17.396
Ctrl MO N-C	Non Clone- Clone	h5b13	10.753	332.924	102.483	1612.854	17.396
Ctrl MO N-C	Non Clone- Clone	h5b13	10.753	336.52	111.309	1497.786	17.396
Ctrl MO N-C	Non Clone- Clone	h5b13	10.753	338.275	111.887	1293.678	17.396
Ctrl MO N-C	Non Clone- Clone	h5b13	10.753	325.378	115.641	1136.877	17.396
Ctrl MO N-C	Non Clone- Clone	h5b13	10.753	317.647	114.999	1075.09	17.396
Ctrl MO N-C	Non Clone- Clone	h5b13	10.753	308.261	116.113	1140.1	17.396
Ctrl MO N-C	Non Clone- Clone	h5b13	10.753	298.866	113.559	1168.091	17.396
Ctrl MO N-C	Non Clone- Clone	h5b13	10.753	285.365	106.529	1016.102	17.396
Ctrl MO N-C	Non Clone- Clone	h5b13	10.753	276.868	117.486	1065.442	17.396
Ctrl MO N-C	Non Clone- Clone	h5b13	10.753	268.383	116.614	1157.554	17.396
Ctrl MO N-C	Non Clone- Clone	h5b13	10.753	267.073	114.287	1172.773	17.396
Ctrl MO N-C	Non Clone- Clone	h5b13	10.753	277.102	121.695	1207.025	17.396
Ctrl MO N-C	Non Clone- Clone	h5b13	10.753	302.068	113.152	1263.014	17.396
Ctrl MO N-N	Non Clone- Non Clone	h1b1	12.374	179.481	99.542	492.963	20.03
Ctrl MO N-N	Non Clone- Non Clone	h1b1	12.374	225.012	104.914	797.373	20.03
Ctrl MO N-N	Non Clone- Non Clone	h1b1	12.374	266.584	101.905	1106.898	20.03
Ctrl MO N-N	Non Clone- Non Clone	h1b1	12.374	289.933	107.397	1043.57	20.03
Ctrl MO N-N	Non Clone- Non Clone	h1b1	12.374	302.843	112.903	1094.143	20.03
Ctrl MO N-N	Non Clone- Non Clone	h1b1	12.374	295.563	112.607	1185.088	20.03
Ctrl MO N-N	Non Clone- Non Clone	h1b1	12.374	286.699	122.621	705.158	20.03
Ctrl MO N-N	Non Clone- Non Clone	h1b1	12.374	287.562	112.397	883.857	20.03
Ctrl MO N-N	Non Clone- Non Clone	h1b1	12.374	287.695	116.764	1038.066	20.03
Ctrl MO N-N	Non Clone- Non Clone
Ctrl MO N-N	Non Clone- Non Clone	h1b2	11.779	186.96	102.408	458.75	19.065
Ctrl MO N-N	Non Clone- Non Clone	h1b2	11.779	231.976	101.706	677.643	19.065
Ctrl MO N-N	Non Clone- Non Clone	h1b2	11.779	276.601	98.374	883.906	19.065
Ctrl MO N-N	Non Clone- Non Clone	h1b2	11.347	340.854	122.727	1785.444	18.362
Ctrl MO N-N	Non Clone- Non Clone	h1b2	11.347	320.026	108.774	2157.301	18.362
Ctrl MO N-N	Non Clone- Non Clone	h1b2	11.347	281.089	119.131	1949.628	18.362
Ctrl MO N-N	Non Clone- Non Clone	h1b2	11.347	272.52	131.625	1426.74	18.362
Ctrl MO N-N	Non Clone- Non Clone	h1b2	11.347	288.653	119.692	1702.429	18.362
Ctrl MO N-N	Non Clone- Non Clone	h1b2	11.347	329.66	130.61	1697.381	18.362
Ctrl MO N-N	Non Clone- Non Clone
Ctrl MO N-N	Non Clone- Non Clone	h1b3	4.917	180.316	108.294	293.057	7.907
Ctrl MO N-N	Non Clone- Non Clone	h1b3	4.917	233.145	122.775	436.507	7.907
Ctrl MO N-N	Non Clone- Non Clone	h1b3	4.917	321.167	124.308	748.795	7.907
Ctrl MO N-N	Non Clone- Non Clone	h1b3	4.917	389.504	141.92	947.097	7.907
Ctrl MO N-N	Non Clone- Non Clone	h1b3	4.917	407.926	165.13	1036.529	7.907
Ctrl MO N-N	Non Clone- Non Clone	h1b3	4.917	434.149	192.418	1668.732	7.907
Ctrl MO N-N	Non Clone- Non Clone	h1b3	4.917	474.839	153.409	1616.77	7.907
Ctrl MO N-N	Non Clone- Non Clone	h1b3	4.917	496.604	206.189	1220.916	7.907
Ctrl MO N-N	Non Clone- Non Clone	h1b3	4.917	502.575	199.823	1286.751	7.907
Ctrl MO N-N	Non Clone- Non Clone
Ctrl MO N-N	Non Clone- Non Clone	h1b4	12.698	260.86	118.484	589.956	20.559
Ctrl MO N-N	Non Clone- Non Clone	h1b4	12.698	367.988	113.464	861.962	20.559
Ctrl MO N-N	Non Clone- Non Clone	h1b4	12.698	452.115	144.56	1087.245	20.559
Ctrl MO N-N	Non Clone- Non Clone	h1b4	12.698	483.181	146.92	1234.917	20.559
Ctrl MO N-N	Non Clone- Non Clone	h1b4	12.698	481.326	175.763	1349.868	20.559
Ctrl MO N-N	Non Clone- Non Clone	h1b4	12.698	488.972	160.523	1290.044	20.559
Ctrl MO N-N	Non Clone- Non Clone	h1b4	12.698	507.477	138.821	1639.781	20.559
Ctrl MO N-N	Non Clone- Non Clone	h1b4	12.698	513.081	167.493	2071.531	20.559
Ctrl MO N-N	Non Clone- Non Clone	h1b4	12.698	486.398	140.601	2120.918	20.559
Ctrl MO N-N	Non Clone- Non Clone
Ctrl MO N-N	Non Clone- Non Clone	h1b5	10.591	218.572	102.705	609.376	17.132
Ctrl MO N-N	Non Clone- Non Clone	h1b5	10.591	280.886	105.767	991.445	17.132
Ctrl MO N-N	Non Clone- Non Clone	h1b5	10.591	339.462	103.346	1583.28	17.132
Ctrl MO N-N	Non Clone- Non Clone	h1b5	10.591	353.967	118.558	1333.678	17.132
Ctrl MO N-N	Non Clone- Non Clone	h1b5	10.591	360.568	112.433	1223.302	17.132
Ctrl MO N-N	Non Clone- Non Clone	h1b5	10.591	364.867	127.752	1364.767	17.132
Ctrl MO N-N	Non Clone- Non Clone	h1b5	10.591	348.03	126.378	1096.565	17.132
Ctrl MO N-N	Non Clone- Non Clone	h1b5	10.591	343.021	120.414	1158.956	17.132
Ctrl MO N-N	Non Clone- Non Clone	h1b5	10.591	340.824	124.774	1194.416	17.132
Ctrl MO N-N	Non Clone- Non Clone	h1b5	10.591	343.861	112.225	990.883	17.132
Ctrl MO N-N	Non Clone- Non Clone
Ctrl MO N-N	Non Clone- Non Clone	h1b6	11.563	164.586	97.964	335.88	18.714
Ctrl MO N-N	Non Clone- Non Clone	h1b6	11.563	188.811	100.214	446.155	18.714
Ctrl MO N-N	Non Clone- Non Clone	h1b6	11.563	227.337	98.491	592.035	18.714
Ctrl MO N-N	Non Clone- Non Clone	h1b6	11.563	267.94	104.412	732.855	18.714
Ctrl MO N-N	Non Clone- Non Clone	h1b6	11.563	282.061	107.802	863.646	18.714
Ctrl MO N-N	Non Clone- Non Clone	h1b6	11.563	282.499	105.389	872.471	18.714
Ctrl MO N-N	Non Clone- Non Clone	h1b6	11.563	289.272	113.145	891.444	18.714
Ctrl MO N-N	Non Clone- Non Clone	h1b6	11.563	321.629	127.115	1467.219	18.714
Ctrl MO N-N	Non Clone- Non Clone	h1b6	11.563	344.579	133.67	2348.983	18.714
Ctrl MO N-N	Non Clone- Non Clone	h1b6	11.563	354.86	124.351	2577.029	18.714
Ctrl MO N-N	Non Clone- Non Clone	h2b1	6.214	212.198	106.179	734.614	10.016
Ctrl MO N-N	Non Clone- Non Clone	h2b1	6.214	266.976	110.535	1450.323	10.016
Ctrl MO N-N	Non Clone- Non Clone	h2b1	6.214	311.202	134.648	1833.561	10.016
Ctrl MO N-N	Non Clone- Non Clone	h2b1	6.214	365.614	135.015	2318.366	10.016
Ctrl MO N-N	Non Clone- Non Clone	h2b1	6.214	459.061	183.195	1669.327	10.016
Ctrl MO N-N	Non Clone- Non Clone
Ctrl MO N-N	Non Clone- Non Clone	h2b2	6.97	285.576	117.431	622.487	11.246
Ctrl MO N-N	Non Clone- Non Clone	h2b2	6.97	383.499	153.583	1065.037	11.246
Ctrl MO N-N	Non Clone- Non Clone	h2b2	6.97	446.814	174.479	1352.578	11.246
Ctrl MO N-N	Non Clone- Non Clone	h2b2	6.97	472.23	179.806	1587.345	11.246
Ctrl MO N-N	Non Clone- Non Clone	h2b2	6.97	465.992	151.711	1220.818	11.246
Ctrl MO N-N	Non Clone- Non Clone	h2b2	6.97	425.973	137.129	1180.07	11.246
Ctrl MO N-N	Non Clone- Non Clone
Ctrl MO N-N	Non Clone- Non Clone	h2b3	8.916	272.934	118.215	752.92	14.409
Ctrl MO N-N	Non Clone- Non Clone	h2b3	8.916	352.529	113.167	1186.952	14.409
Ctrl MO N-N	Non Clone- Non Clone	h2b3	8.916	407.674	137.536	1340.989	14.409
Ctrl MO N-N	Non Clone- Non Clone	h2b3	8.916	450.724	148.158	1919.65	14.409
Ctrl MO N-N	Non Clone- Non Clone	h2b3	8.916	489.05	141.365	2943.432	14.409
Ctrl MO N-N	Non Clone- Non Clone	h2b3	8.916	469.774	137.025	2488.671	14.409
Ctrl MO N-N	Non Clone- Non Clone
Ctrl MO N-N	Non Clone- Non Clone	h2b4	7.349	305.195	125.44	728.686	11.861
Ctrl MO N-N	Non Clone- Non Clone	h2b4	7.349	380.783	133.686	975.288	11.861
Ctrl MO N-N	Non Clone- Non Clone	h2b4	7.349	428.277	156.52	1168.956	11.861
Ctrl MO N-N	Non Clone- Non Clone	h2b4	7.349	486.269	166.778	1432.875	11.861
Ctrl MO N-N	Non Clone- Non Clone	h2b4	7.349	586.662	198.366	1843.918	11.861
Ctrl MO N-N	Non Clone- Non Clone	h2b4	7.349	635.578	155.385	2372.058	11.861
Ctrl MO N-N	Non Clone- Non Clone
Ctrl MO N-N	Non Clone- Non Clone	h2b5	6.754	253.359	112.421	678.717	10.894
Ctrl MO N-N	Non Clone- Non Clone	h2b5	6.754	280.744	116.416	1067.649	10.894
Ctrl MO N-N	Non Clone- Non Clone	h2b5	6.754	288.855	133.161	1197.366	10.894
Ctrl MO N-N	Non Clone- Non Clone	h2b5	6.754	299.121	121.588	1046.832	10.894
Ctrl MO N-N	Non Clone- Non Clone	h2b5	6.7	508.742	138.566	1582.356	10.807
Ctrl MO N-N	Non Clone- Non Clone	h2b5	6.7	546.873	163.598	2815.093	10.807
Ctrl MO N-N	Non Clone- Non Clone	h2b5	6.7	497.861	134.526	3654.215	10.807
Ctrl MO N-N	Non Clone- Non Clone
Ctrl MO N-N	Non Clone- Non Clone	h2b6	9.294	192.872	110.571	400.623	15.024
Ctrl MO N-N	Non Clone- Non Clone	h2b6	9.294	252.092	114.712	497.494	15.024
Ctrl MO N-N	Non Clone- Non Clone	h2b6	9.294	312.379	133.834	755.252	15.024
Ctrl MO N-N	Non Clone- Non Clone	h2b6	9.294	377.862	136.455	1047.948	15.024
Ctrl MO N-N	Non Clone- Non Clone	h2b6	9.294	460.193	141.833	1376.001	15.024
Ctrl MO N-N	Non Clone- Non Clone	h2b6	9.294	520.402	144.023	1672.977	15.024
Ctrl MO N-N	Non Clone- Non Clone
Ctrl MO N-N	Non Clone- Non Clone	h2b7	9.186	229.437	97.59	997.388	14.848
Ctrl MO N-N	Non Clone- Non Clone	h2b7	9.186	294.05	118.392	1920.914	14.848
Ctrl MO N-N	Non Clone- Non Clone	h2b7	9.186	370.704	113.002	2857.943	14.848
Ctrl MO N-N	Non Clone- Non Clone	h2b7	9.186	442.098	148.333	2382.072	14.848
Ctrl MO N-N	Non Clone- Non Clone	h2b7	9.186	476.748	158.737	2364.374	14.848
Ctrl MO N-N	Non Clone- Non Clone	h2b7	9.186	475.285	140.856	2069.03	14.848
Ctrl MO N-N	Non Clone- Non Clone
Ctrl MO N-N	Non Clone- Non Clone	h2b8	3.134	263.435	116.629	634.968	5.008
Ctrl MO N-N	Non Clone- Non Clone	h2b8	3.134	343.226	129.088	936.066	5.008
Ctrl MO N-N	Non Clone- Non Clone	h2b8	3.134	460.642	164.218	1555.418	5.008
Ctrl MO N-N	Non Clone- Non Clone	h2b8	3.134	597.88	222.585	2231.028	5.008
Ctrl MO N-N	Non Clone- Non Clone	h2b8	3.134	689.922	254.164	2126.951	5.008
Ctrl MO N-N	Non Clone- Non Clone	h3b1	8.862	301.385	121.109	1358.514	14.321
Ctrl MO N-N	Non Clone- Non Clone	h3b1	8.862	328.318	119.786	1366.303	14.321
Ctrl MO N-N	Non Clone- Non Clone	h3b1	8.862	370.209	143.761	1308.255	14.321
Ctrl MO N-N	Non Clone- Non Clone	h3b1	8.862	384.319	136.172	1167.305	14.321
Ctrl MO N-N	Non Clone- Non Clone	h3b1	8.862	386.549	135.18	1322.404	14.321
Ctrl MO N-N	Non Clone- Non Clone	h3b1	8.862	367.452	151.407	1068.349	14.321
Ctrl MO N-N	Non Clone- Non Clone	h3b1	8.862	319.408	119.551	920.834	14.321
Ctrl MO N-N	Non Clone- Non Clone	h3b1	8.862	271.759	130.546	886.945	14.321
Ctrl MO N-N	Non Clone- Non Clone
Ctrl MO N-N	Non Clone- Non Clone	h3b2	10.969	202.445	100.865	642.112	17.747
Ctrl MO N-N	Non Clone- Non Clone	h3b2	10.969	209.033	103.175	618.677	17.747
Ctrl MO N-N	Non Clone- Non Clone	h3b2	10.969	226.924	101.841	839.295	17.747
Ctrl MO N-N	Non Clone- Non Clone	h3b2	10.969	246.589	110.473	1132.35	17.747
Ctrl MO N-N	Non Clone- Non Clone	h3b2	10.969	267.14	109.165	1181.405	17.747
Ctrl MO N-N	Non Clone- Non Clone	h3b2	10.969	292.062	111.45	1181.116	17.747
Ctrl MO N-N	Non Clone- Non Clone	h3b2	10.969	310.199	115.196	995.418	17.747
Ctrl MO N-N	Non Clone- Non Clone	h3b2	10.969	322.375	121.399	1094.531	17.747
Ctrl MO N-N	Non Clone- Non Clone
Ctrl MO N-N	Non Clone- Non Clone	h3b3	9.942	224.496	100.312	1075.005	16.078
Ctrl MO N-N	Non Clone- Non Clone	h3b3	9.942	253.205	105.74	1422.529	16.078
Ctrl MO N-N	Non Clone- Non Clone	h3b3	9.942	293.052	117.956	1600.813	16.078
Ctrl MO N-N	Non Clone- Non Clone	h3b3	9.942	337.949	129.1	1437.989	16.078
Ctrl MO N-N	Non Clone- Non Clone	h3b3	9.942	373.986	116.666	1073.192	16.078
Ctrl MO N-N	Non Clone- Non Clone	h3b3	9.942	409.065	154.148	1550.483	16.078
Ctrl MO N-N	Non Clone- Non Clone	h3b3	9.942	416.714	141.625	1521.848	16.078
Ctrl MO N-N	Non Clone- Non Clone	h3b3	9.942	372.378	136.695	1210.338	16.078
Ctrl MO N-N	Non Clone- Non Clone	h3b3	9.942	324.529	126.182	1299.849	16.078
Ctrl MO N-N	Non Clone- Non Clone	h4b1	11.779	248.768	110.915	847.92	19.065
Ctrl MO N-N	Non Clone- Non Clone	h4b1	11.779	305.607	121.42	1420.897	19.065
Ctrl MO N-N	Non Clone- Non Clone	h4b1	11.779	322.919	124.477	1389.602	19.065
Ctrl MO N-N	Non Clone- Non Clone	h4b1	11.779	352.191	123.438	1220.933	19.065
Ctrl MO N-N	Non Clone- Non Clone	h4b1	11.779	369.908	128.853	1338.003	19.065
Ctrl MO N-N	Non Clone- Non Clone	h4b1	11.779	378.13	125.671	1075.635	19.065
Ctrl MO N-N	Non Clone- Non Clone	h4b1	11.779	354.267	124.157	1128.524	19.065
Ctrl MO N-N	Non Clone- Non Clone	h4b1	11.779	328.362	108.662	1024.336	19.065
Ctrl MO N-N	Non Clone- Non Clone
Ctrl MO N-N	Non Clone- Non Clone	h4b2	8.591	176.079	106.286	432.432	13.882
Ctrl MO N-N	Non Clone- Non Clone	h4b2	8.591	228.791	107.675	759.87	13.882
Ctrl MO N-N	Non Clone- Non Clone	h4b2	8.591	270.41	118.895	1198.249	13.882
Ctrl MO N-N	Non Clone- Non Clone	h4b2	8.591	293.238	124.504	1499.661	13.882
Ctrl MO N-N	Non Clone- Non Clone	h4b2	8.591	302.929	106.567	1131.502	13.882
Ctrl MO N-N	Non Clone- Non Clone	h4b2	8.591	293.392	126.85	852.728	13.882
Ctrl MO N-N	Non Clone- Non Clone	h4b2	8.591	296.516	124.344	1112.119	13.882
Ctrl MO N-N	Non Clone- Non Clone
Ctrl MO N-N	Non Clone- Non Clone	h4b3	7.024	189.638	101.288	475.773	11.334
Ctrl MO N-N	Non Clone- Non Clone	h4b3	7.024	243.117	108.678	760.675	11.334
Ctrl MO N-N	Non Clone- Non Clone	h4b3	7.024	275.817	106.86	847.477	11.334
Ctrl MO N-N	Non Clone- Non Clone	h4b3	7.024	309.961	117.26	1185.797	11.334
Ctrl MO N-N	Non Clone- Non Clone	h4b3	7.024	350.078	126.391	937.987	11.334
Ctrl MO N-N	Non Clone- Non Clone	h4b3	7.024	392.952	147.959	1018.733	11.334
Ctrl MO N-N	Non Clone- Non Clone	h4b3	7.024	392.905	160.514	1337.963	11.334
Ctrl MO N-N	Non Clone- Non Clone	h4b3	7.024	341.831	127.612	1977.591	11.334
Ctrl MO N-N	Non Clone- Non Clone	h4b3	7.024	289.605	121.881	2175.327	11.334
Ctrl MO N-N	Non Clone- Non Clone
Ctrl MO N-N	Non Clone- Non Clone	h4b4	10.483	214.702	103.065	615.128	16.957
Ctrl MO N-N	Non Clone- Non Clone	h4b4	10.483	253.531	104.559	1104.39	16.957
Ctrl MO N-N	Non Clone- Non Clone	h4b4	10.483	281.946	105.755	1651.862	16.957
Ctrl MO N-N	Non Clone- Non Clone	h4b4	10.483	341.836	111.138	1499.427	16.957
Ctrl MO N-N	Non Clone- Non Clone	h4b4	10.483	385.8	121.972	1307.966	16.957
Ctrl MO N-N	Non Clone- Non Clone	h4b4	10.483	372.515	130.616	1270.796	16.957
Ctrl MO N-N	Non Clone- Non Clone	h4b4	10.483	305.188	131.412	1268.543	16.957
Ctrl MO N-N	Non Clone- Non Clone	h4b4	10.483	240.42	109.776	1089.836	16.957
Ctrl MO N-N	Non Clone- Non Clone
Ctrl MO N-N	Non Clone- Non Clone	h4b5	11.942	149.512	96.933	500.831	19.329
Ctrl MO N-N	Non Clone- Non Clone	h4b5	11.942	168.697	98.606	864.633	19.329
Ctrl MO N-N	Non Clone- Non Clone	h4b5	11.942	184.168	98.62	641.666	19.329
Ctrl MO N-N	Non Clone- Non Clone	h4b5	11.942	203.593	99.029	646.09	19.329
Ctrl MO N-N	Non Clone- Non Clone	h4b5	11.942	225.826	104.727	973.913	19.329
Ctrl MO N-N	Non Clone- Non Clone	h4b5	11.942	244.555	98.653	1279.184	19.329
Ctrl MO N-N	Non Clone- Non Clone	h4b5	11.942	263.098	101.619	1398.635	19.329
Ctrl MO N-N	Non Clone- Non Clone	h4b5	11.942	274.104	107.532	1549.237	19.329
Ctrl MO N-N	Non Clone- Non Clone	h4b5	11.942	283.191	99.965	1615.934	19.329
Ctrl MO N-N	Non Clone- Non Clone	h5b1	8.051	261.3	108.94	1718.381	13.003
Ctrl MO N-N	Non Clone- Non Clone	h5b1	8.051	274.544	105.681	1661.292	13.003
Ctrl MO N-N	Non Clone- Non Clone	h5b1	8.051	282.876	108.471	1395.008	13.003
Ctrl MO N-N	Non Clone- Non Clone	h5b1	8.051	294.283	108.153	1162.482	13.003
Ctrl MO N-N	Non Clone- Non Clone	h5b1	8.051	296.725	110.403	1180.13	13.003
Ctrl MO N-N	Non Clone- Non Clone	h5b1	8.051	309.356	115.804	1101.841	13.003
Ctrl MO N-N	Non Clone- Non Clone	h5b1	8.051	329.867	119.579	1096.858	13.003
Ctrl MO N-N	Non Clone- Non Clone	h5b1	8.051	339.449	133.582	1242.813	13.003
Ctrl MO N-N	Non Clone- Non Clone	h5b1	8.051	337.628	124.5	1018.677	13.003
Ctrl MO N-N	Non Clone- Non Clone	h5b1	8.051	332.092	141.036	1092.25	13.003
Ctrl MO N-N	Non Clone- Non Clone	h5b1	8.051	317.751	140.082	1008.09	13.003
Ctrl MO N-N	Non Clone- Non Clone
Ctrl MO N-N	Non Clone- Non Clone	h5b2	8.916	292.473	111.427	1044.669	14.409
Ctrl MO N-N	Non Clone- Non Clone	h5b2	8.916	344.611	111.775	1140.096	14.409
Ctrl MO N-N	Non Clone- Non Clone	h5b2	8.916	368.897	137.617	1372.849	14.409
Ctrl MO N-N	Non Clone- Non Clone	h5b2	8.916	377.98	141.194	1797.224	14.409
Ctrl MO N-N	Non Clone- Non Clone	h5b2	8.916	384.62	146.42	1816.849	14.409
Ctrl MO N-N	Non Clone- Non Clone	h5b2	8.916	383.696	127.156	1678.037	14.409
Ctrl MO N-N	Non Clone- Non Clone	h5b2	8.916	381.998	129.238	1373.842	14.409
Ctrl MO N-N	Non Clone- Non Clone	h5b2	8.916	382.94	146.363	1078.334	14.409
Ctrl MO N-N	Non Clone- Non Clone	h5b2	8.916	381.359	139.088	994.484	14.409
Ctrl MO N-N	Non Clone- Non Clone	h5b2	8.916	393.151	135.582	1066.524	14.409
Ctrl MO N-N	Non Clone- Non Clone	h5b2	8.916	406.347	118.854	1315.915	14.409
Ctrl MO N-N	Non Clone- Non Clone	h5b2	8.916	403.897	144.366	1502.589	14.409
Ctrl MO N-N	Non Clone- Non Clone
Ctrl MO N-N	Non Clone- Non Clone	h5b3	16.048	252.581	108.501	597.005	26.006
Ctrl MO N-N	Non Clone- Non Clone	h5b3	16.048	258.359	106.357	736.614	26.006
Ctrl MO N-N	Non Clone- Non Clone	h5b3	16.048	262.835	106.629	941.977	26.006
Ctrl MO N-N	Non Clone- Non Clone	h5b3	16.048	260.645	108.279	1412.818	26.006
Ctrl MO N-N	Non Clone- Non Clone	h5b3	16.048	255.164	103.046	1470.272	26.006
Ctrl MO N-N	Non Clone- Non Clone	h5b3	16.048	246.792	106.269	1186.708	26.006
Ctrl MO N-N	Non Clone- Non Clone	h5b3	16.048	236.738	104.216	869.024	26.006
Ctrl MO N-N	Non Clone- Non Clone	h5b3	16.643	296.271	126.528	1016.106	26.973
Ctrl MO N-N	Non Clone- Non Clone	h5b3	16.643	320.009	123.796	872.311	26.973
Ctrl MO N-N	Non Clone- Non Clone	h5b3	16.643	324.824	137.695	825.63	26.973
Ctrl MO N-N	Non Clone- Non Clone	h5b3	16.643	326.816	130.083	803.525	26.973
Ctrl MO N-N	Non Clone- Non Clone	h5b3	16.643	334.532	128.866	1008.52	26.973
Ctrl MO N-N	Non Clone- Non Clone	h5b3	16.643	343.824	128.706	1392.786	26.973
Ctrl MO N-N	Non Clone- Non Clone	h5b3	16.643	347.612	134.313	1721.794	26.973
Ctrl MO N-N	Non Clone- Non Clone
Ctrl MO N-N	Non Clone- Non Clone	h5b4	11.293	323.691	122.95	956.743	18.275
Ctrl MO N-N	Non Clone- Non Clone	h5b4	11.293	365.741	116.865	1258.964	18.275
Ctrl MO N-N	Non Clone- Non Clone	h5b4	11.293	373.986	126.739	1543.002	18.275
Ctrl MO N-N	Non Clone- Non Clone	h5b4	11.293	376.619	148.024	1290.184	18.275
Ctrl MO N-N	Non Clone- Non Clone	h5b4	11.293	388.811	130.721	1459.653	18.275
Ctrl MO N-N	Non Clone- Non Clone	h5b4	11.293	413.375	140.115	1622.42	18.275
Ctrl MO N-N	Non Clone- Non Clone	h5b4	11.293	442.954	158.09	1878.356	18.275
Ctrl MO N-N	Non Clone- Non Clone	h5b4	11.293	456.893	132.446	1883.031	18.275
Ctrl MO N-N	Non Clone- Non Clone	h5b4	11.293	448.613	146.452	1676.335	18.275
Ctrl MO N-N	Non Clone- Non Clone	h5b4	11.293	405.702	148.591	1431.97	18.275
Ctrl MO N-N	Non Clone- Non Clone	h5b4	11.293	366.619	130.721	1893.384	18.275
Ecad MO C-C	Clone- Clone	h1b1	14.319	226.505	108.586	642.338	23.195
Ecad MO C-C	Clone- Clone	h1b1	14.319	228.32	110.744	864.238	23.195
Ecad MO C-C	Clone- Clone	h1b1	14.319	233.035	110.869	993.716	23.195
Ecad MO C-C	Clone- Clone	h1b1	14.319	245.464	120.255	847.142	23.195
Ecad MO C-C	Clone- Clone	h1b1	14.319	282.22	130.309	860.505	23.195
Ecad MO C-C	Clone- Clone	h1b1	14.319	308.145	134.738	941.407	23.195
Ecad MO C-C	Clone- Clone
Ecad MO C-C	Clone- Clone	h1b2	4.377	135.463	99.624	283.356	7.029
Ecad MO C-C	Clone- Clone	h1b2	4.377	157.872	100.075	520.145	7.029
Ecad MO C-C	Clone- Clone	h1b2	4.377	160.953	105.231	524.726	7.029
Ecad MO C-C	Clone- Clone	h1b2	4.377	163.869	101.072	440.584	7.029
Ecad MO C-C	Clone- Clone	h1b2	4.377	181.32	105.36	465.541	7.029
Ecad MO C-C	Clone- Clone	h1b2	4.377	216.63	111.395	552.022	7.029
Ecad MO C-C	Clone- Clone
Ecad MO C-C	Clone- Clone	h1b3	6.592	153.116	98.807	367.379	10.631
Ecad MO C-C	Clone- Clone	h1b3	6.592	199.716	109.953	488.741	10.631
Ecad MO C-C	Clone- Clone	h1b3	6.592	250.428	105.425	801.454	10.631
Ecad MO C-C	Clone- Clone	h1b3	6.592	261.745	121.331	768.528	10.631
Ecad MO C-C	Clone- Clone	h1b3	6.592	249.411	119.163	775.37	10.631
Ecad MO C-C	Clone- Clone	h1b3	6.592	243.619	128.94	600.09	10.631
Ecad MO C-C	Clone- Clone
Ecad MO C-C	Clone- Clone	h1b4	10.321	191.979	104.072	546.05	16.693
Ecad MO C-C	Clone- Clone	h1b4	10.321	222.716	109.983	974.091	16.693
Ecad MO C-C	Clone- Clone	h1b4	10.321	244.632	124.637	1086.922	16.693
Ecad MO C-C	Clone- Clone	h1b4	10.321	265.126	124.858	804.658	16.693
Ecad MO C-C	Clone- Clone	h1b4	10.321	291.207	135.684	1707.025	16.693
Ecad MO C-C	Clone- Clone	h1b4	10.321	342.337	125.767	2418.39	16.693
Ecad MO C-C	Clone- Clone
Ecad MO C-C	Clone- Clone	h1b5	7.619	132.824	98.404	271.513	12.3
Ecad MO C-C	Clone- Clone	h1b5	7.619	159.054	101.465	496.654	12.3
Ecad MO C-C	Clone- Clone	h1b5	7.619	183.538	103.922	640.79	12.3
Ecad MO C-C	Clone- Clone	h1b5	7.619	206.159	105.312	626.899	12.3
Ecad MO C-C	Clone- Clone	h1b5	7.619	232.666	107.621	697.647	12.3
Ecad MO C-C	Clone- Clone	h1b5	7.619	265.175	122.684	900.617	12.3
Ecad MO C-C	Clone- Clone
Ecad MO C-C	Clone- Clone	h1b6	11.617	145.121	100.253	299.522	18.802
Ecad MO C-C	Clone- Clone	h1b6	11.617	179.999	100.207	534.228	18.802
Ecad MO C-C	Clone- Clone	h1b6	11.617	222.492	107.268	1224.531	18.802
Ecad MO C-C	Clone- Clone	h1b6	11.617	242.979	99.212	1420.95	18.802
Ecad MO C-C	Clone- Clone	h1b6	11.617	258.673	125.465	1004.362	18.802
Ecad MO C-C	Clone- Clone	h1b6	11.617	280.98	125.617	1038.173	18.802
Ecad MO C-C	Clone- Clone	h1b6	11.617	315.755	131.339	1574.442	18.802
Ecad MO C-C	Clone- Clone	h1b6	11.617	336.093	146.001	1983.175	18.802
Ecad MO C-C	Clone- Clone
Ecad MO C-C	Clone- Clone	h1b7	9.672	146.933	100.803	307.733	15.637
Ecad MO C-C	Clone- Clone	h1b7	9.672	176.661	101.611	528.464	15.637
Ecad MO C-C	Clone- Clone	h1b7	9.672	177.617	104.314	594.068	15.637
Ecad MO C-C	Clone- Clone	h1b7	9.672	174.988	97.405	479.169	15.637
Ecad MO C-C	Clone- Clone	h1b7	9.672	183.557	108.645	461.996	15.637
Ecad MO C-C	Clone- Clone	h1b7	9.348	289.018	107.826	950.083	15.112
Ecad MO C-C	Clone- Clone	h1b7	9.348	320.587	118.332	1024.746	15.112
Ecad MO C-C	Clone- Clone	h1b7	9.348	304.912	126.467	1082.163	15.112
Ecad MO C-C	Clone- Clone
Ecad MO C-C	Clone- Clone	h1b8	12.374	159.248	100.271	358.297	20.032
Ecad MO C-C	Clone- Clone	h1b8	12.374	195.112	94.139	789.566	20.032
Ecad MO C-C	Clone- Clone	h1b8	12.374	209.203	102.525	873.851	20.032
Ecad MO C-C	Clone- Clone	h1b8	12.374	222.281	102.001	877.593	20.032
Ecad MO C-C	Clone- Clone	h1b8	12.374	224.306	103.993	688.397	20.032
Ecad MO C-C	Clone- Clone	h1b8	12.374	229.434	112.514	903.825	20.032
Ecad MO C-C	Clone- Clone	h1b8	12.374	256.35	100.003	1112.996	20.032
Ecad MO C-C	Clone- Clone	h1b8	12.374	285.164	106.865	1377.063	20.032
Ecad MO C-C	Clone- Clone	h2b1	9.24	207.984	104.459	505.043	14.936
Ecad MO C-C	Clone- Clone	h2b1	9.24	286.488	113.277	821.441	14.936
Ecad MO C-C	Clone- Clone	h2b1	9.24	349.663	128.986	1474.188	14.936
Ecad MO C-C	Clone- Clone	h2b1	9.24	398.362	121.703	1223.422	14.936
Ecad MO C-C	Clone- Clone	h2b1	9.24	438.711	144.496	1567.827	14.936
Ecad MO C-C	Clone- Clone
Ecad MO C-C	Clone- Clone	h2b2	4.485	199.303	106.687	463.991	7.204
Ecad MO C-C	Clone- Clone	h2b2	4.485	272.633	122.652	851.641	7.204
Ecad MO C-C	Clone- Clone	h2b2	4.485	340.65	156.746	1556.816	7.204
Ecad MO C-C	Clone- Clone	h2b2	4.485	394.081	151.67	2079.416	7.204
Ecad MO C-C	Clone- Clone	h2b2	4.485	460.999	144.42	1547.616	7.204
Ecad MO C-C	Clone- Clone
Ecad MO C-C	Clone- Clone	h2b3	12.644	196.767	105.584	442.696	20.471
Ecad MO C-C	Clone- Clone	h2b3	12.644	266.452	116.704	801.19	20.471
Ecad MO C-C	Clone- Clone	h2b3	12.644	324.106	144.805	1161.405	20.471
Ecad MO C-C	Clone- Clone	h2b3	12.644	408.158	167.443	1317.908	20.471
Ecad MO C-C	Clone- Clone	h2b3	12.644	463.725	160.12	2024.975	20.471
Ecad MO C-C	Clone- Clone
Ecad MO C-C	Clone- Clone	h2b4	6.646	216.102	110.664	550.397	10.719
Ecad MO C-C	Clone- Clone	h2b4	6.646	290.252	121.485	1173.178	10.719
Ecad MO C-C	Clone- Clone	h2b4	6.646	342.187	155.105	1464.227	10.719
Ecad MO C-C	Clone- Clone	h2b4	6.646	366.865	147.532	803.459	10.719
Ecad MO C-C	Clone- Clone	h2b4	6.646	351.927	148.862	1056.347	10.719
Ecad MO C-C	Clone- Clone
Ecad MO C-C	Clone- Clone	h2b5	7.187	215.17	106.166	498.883	11.597
Ecad MO C-C	Clone- Clone	h2b5	7.187	276.224	108.065	1014.208	11.597
Ecad MO C-C	Clone- Clone	h2b5	7.187	299.146	127.191	1035.429	11.597
Ecad MO C-C	Clone- Clone	h2b5	7.187	343.798	145.728	990.872	11.597
Ecad MO C-C	Clone- Clone	h2b5	7.187	402.792	162.23	1417.242	11.597
Ecad MO C-C	Clone- Clone
Ecad MO C-C	Clone- Clone	h2b6	7.457	184.877	113.039	398.13	12.037
Ecad MO C-C	Clone- Clone	h2b6	7.457	237.788	112.231	543.949	12.037
Ecad MO C-C	Clone- Clone	h2b6	7.457	280.147	139.884	630.955	12.037
Ecad MO C-C	Clone- Clone	h2b6	7.457	312.434	130.239	683.37	12.037
Ecad MO C-C	Clone- Clone	h2b6	7.457	336.183	141.58	744.146	12.037
Ecad MO C-C	Clone- Clone	h2b6	7.457	393.716	137.212	1286.357	12.037
Ecad MO C-C	Clone- Clone
Ecad MO C-C	Clone- Clone	h2b7	9.78	210.844	110.758	564.764	15.815
Ecad MO C-C	Clone- Clone	h2b7	9.78	278.303	120.766	1113.362	15.815
Ecad MO C-C	Clone- Clone	h2b7	9.78	338.998	135.533	1654.276	15.815
Ecad MO C-C	Clone- Clone	h2b7	9.78	390.932	157.244	1635.902	15.815
Ecad MO C-C	Clone- Clone	h2b7	9.78	414.843	127.278	1019.636	15.815
Ecad MO C-C	Clone- Clone
Ecad MO C-C	Clone- Clone	h2b8	8.213	204.42	107.535	465.49	13.267
Ecad MO C-C	Clone- Clone	h2b8	8.213	257.054	108.081	792.552	13.267
Ecad MO C-C	Clone- Clone	h2b8	8.213	297.066	120.209	1087.22	13.267
Ecad MO C-C	Clone- Clone	h2b8	8.213	408.044	161.986	1487.26	13.267
Ecad MO C-C	Clone- Clone	h2b8	8.213	488.338	145.653	1506.658	13.267
Ecad MO C-C	Clone- Clone	h2b8	8.213	466.376	152.601	1495.909	13.267
Ecad MO C-C	Clone- Clone	h3b1	8.537	213.926	108.315	837.549	13.794
Ecad MO C-C	Clone- Clone	h3b1	8.537	225.812	113.009	698.933	13.794
Ecad MO C-C	Clone- Clone	h3b1	8.537	231.666	112.444	1111.41	13.794
Ecad MO C-C	Clone- Clone	h3b1	8.537	235.478	122.403	1042.133	13.794
Ecad MO C-C	Clone- Clone	h3b1	8.537	232.765	116.297	787.514	13.794
Ecad MO C-C	Clone- Clone	h3b1	8.537	236.061	97.367	764.788	13.794
Ecad MO C-C	Clone- Clone	h3b1	8.537	247.706	118.48	736.954	13.794
Ecad MO C-C	Clone- Clone
Ecad MO C-C	Clone- Clone	h3b2	4.593	214.386	116.513	641.576	7.38
Ecad MO C-C	Clone- Clone	h3b2	4.593	242.301	109.976	567.089	7.38
Ecad MO C-C	Clone- Clone	h3b2	4.593	266.626	120.632	822.062	7.38
Ecad MO C-C	Clone- Clone	h3b2	4.593	291.522	123.058	842.722	7.38
Ecad MO C-C	Clone- Clone	h3b2	4.593	324.914	148.388	857.357	7.38
Ecad MO C-C	Clone- Clone
Ecad MO C-C	Clone- Clone	h3b3	9.78	176.989	109.33	417.501	15.815
Ecad MO C-C	Clone- Clone	h3b3	9.78	201.839	102.394	471.37	15.815
Ecad MO C-C	Clone- Clone	h3b3	9.78	227.342	94.757	544.561	15.815
Ecad MO C-C	Clone- Clone	h3b3	9.78	244.994	104.316	883.693	15.815
Ecad MO C-C	Clone- Clone	h3b3	9.78	272.059	121.828	952.046	15.815
Ecad MO C-C	Clone- Clone	h3b3	9.78	296.214	127.985	2093.562	15.815
Ecad MO C-C	Clone- Clone	h3b3	9.78	307.793	112.349	2776.028	15.815
Ecad MO C-C	Clone- Clone
Ecad MO C-C	Clone- Clone	h3b4	12.212	192.227	107.084	433.877	19.768
Ecad MO C-C	Clone- Clone	h3b4	12.212	207.163	107.074	531.49	19.768
Ecad MO C-C	Clone- Clone	h3b4	12.212	214.429	115.531	700.551	19.768
Ecad MO C-C	Clone- Clone	h3b4	12.212	224.943	110.384	765.749	19.768
Ecad MO C-C	Clone- Clone	h3b4	12.212	251.467	104.068	1016.213	19.768
Ecad MO C-C	Clone- Clone	h3b4	12.212	269.664	109.079	1332.645	19.768
Ecad MO C-C	Clone- Clone
Ecad MO C-C	Clone- Clone	h3b5	7.295	171.586	97.365	595.368	11.773
Ecad MO C-C	Clone- Clone	h3b5	7.295	187.989	102.614	542.34	11.773
Ecad MO C-C	Clone- Clone	h3b5	7.295	195.774	112.893	502.22	11.773
Ecad MO C-C	Clone- Clone	h3b5	7.295	198.258	114.385	443.518	11.773
Ecad MO C-C	Clone- Clone	h3b5	7.295	197.431	111.015	444.477	11.773
Ecad MO C-C	Clone- Clone	h3b5	7.295	192.374	115.112	514.659	11.773
Ecad MO C-C	Clone- Clone	h3b5	7.295	188.058	111.671	478.883	11.773
Ecad MO C-C	Clone- Clone	h3b5	7.295	182.658	108.924	504.194	11.773
Ecad MO C-C	Clone- Clone
Ecad MO C-C	Clone- Clone	h3b6	11.023	167.918	98.181	398.44	17.835
Ecad MO C-C	Clone- Clone	h3b6	11.023	197.852	104.299	580.766	17.835
Ecad MO C-C	Clone- Clone	h3b6	11.023	218.275	111.541	603.434	17.835
Ecad MO C-C	Clone- Clone	h3b6	11.023	232.449	111.566	694.462	17.835
Ecad MO C-C	Clone- Clone	h3b6	11.023	237.623	115.59	764.85	17.835
Ecad MO C-C	Clone- Clone	h3b6	11.023	242.216	124.071	626.551	17.835
Ecad MO C-C	Clone- Clone	h3b6	11.023	246.059	124.984	711.223	17.835
Ecad MO C-C	Clone- Clone	h3b6	11.023	249.484	117.7	748.53	17.835
Ecad MO C-C	Clone- Clone	h4b1	10.645	171.707	97.905	618.342	17.219
Ecad MO C-C	Clone- Clone	h4b1	10.645	182.953	99.443	670.235	17.219
Ecad MO C-C	Clone- Clone	h4b1	10.645	190.119	101.328	678.966	17.219
Ecad MO C-C	Clone- Clone	h4b1	10.645	193.253	100.725	664.636	17.219
Ecad MO C-C	Clone- Clone	h4b1	10.645	200.381	109.33	763.193	17.219
Ecad MO C-C	Clone- Clone	h4b1	10.645	202.987	104.025	748.655	17.219
Ecad MO C-C	Clone- Clone	h4b1	10.645	220.403	114.722	680.058	17.219
Ecad MO C-C	Clone- Clone	h4b1	10.645	246.451	107.403	724.126	17.219
Ecad MO C-C	Clone- Clone
Ecad MO C-C	Clone- Clone	h4b2	6.214	174.685	97.907	541.743	10.016
Ecad MO C-C	Clone- Clone	h4b2	6.214	196.628	102.146	651.652	10.016
Ecad MO C-C	Clone- Clone	h4b2	6.214	204.416	101.367	748.791	10.016
Ecad MO C-C	Clone- Clone	h4b2	6.214	203.554	100.279	723.073	10.016
Ecad MO C-C	Clone- Clone	h4b2	6.214	205.953	106.775	835.601	10.016
Ecad MO C-C	Clone- Clone	h4b2	6.214	212.674	107.53	652.861	10.016
Ecad MO C-C	Clone- Clone	h4b2	6.214	231.476	117.172	568.544	10.016
Ecad MO C-C	Clone- Clone	h4b2	6.214	260.37	115.158	819.529	10.016
Ecad MO C-C	Clone- Clone
Ecad MO C-C	Clone- Clone	h4b3	14.103	168.257	99.444	730.81	22.843
Ecad MO C-C	Clone- Clone	h4b3	14.103	184.437	100.163	418.692	22.843
Ecad MO C-C	Clone- Clone	h4b3	14.103	203.086	100.585	585.949	22.843
Ecad MO C-C	Clone- Clone	h4b3	14.103	214.787	107.169	814.003	22.843
Ecad MO C-C	Clone- Clone	h4b3	14.103	222.954	105.566	959.618	22.843
Ecad MO C-C	Clone- Clone	h4b3	14.103	229.645	109.07	843.636	22.843
Ecad MO C-C	Clone- Clone	h4b3	14.103	244.726	114.73	700.787	22.843
Ecad MO C-C	Clone- Clone	h4b3	14.103	257.589	112.087	786.839	22.843
Ecad MO C-C	Clone- Clone	h5b1	9.78	139.598	98.83	332.098	15.815
Ecad MO C-C	Clone- Clone	h5b1	9.78	142.682	101.108	383.906	15.815
Ecad MO C-C	Clone- Clone	h5b1	9.78	145.101	96.834	309.74	15.815
Ecad MO C-C	Clone- Clone	h5b1	9.78	150.04	100.174	337.645	15.815
Ecad MO C-C	Clone- Clone	h5b1	9.78	157.028	103.425	371.28	15.815
Ecad MO C-C	Clone- Clone	h5b1	9.78	160.519	99.5	452.079	15.815
Ecad MO C-C	Clone- Clone	h5b1	9.78	161.013	100.596	371.035	15.815
Ecad MO C-C	Clone- Clone	h5b1	9.78	168.506	101.195	651.656	15.815
Ecad MO C-C	Clone- Clone	h5b1	9.78	162.645	97.348	689.179	15.815
Ecad MO C-C	Clone- Clone
Ecad MO C-C	Clone- Clone	h5b2	10.375	134.426	97.894	309.237	16.781
Ecad MO C-C	Clone- Clone	h5b2	10.375	141.195	100.107	319.716	16.781
Ecad MO C-C	Clone- Clone	h5b2	10.375	149.12	97.963	636.626	16.781
Ecad MO C-C	Clone- Clone	h5b2	10.375	155.751	101.6	863.455	16.781
Ecad MO C-C	Clone- Clone	h5b2	10.375	158.205	102.361	591.128	16.781
Ecad MO C-C	Clone- Clone	h5b2	10.375	170.399	99.709	1392.58	16.781
Ecad MO C-C	Clone- Clone	h5b2	10.375	191.464	102.12	2611.758	16.781
Ecad MO C-C	Clone- Clone
Ecad MO C-C	Clone- Clone	h5b3	9.348	116.134	94.511	208.958	15.112
Ecad MO C-C	Clone- Clone	h5b3	9.348	123.124	94.431	240.221	15.112
Ecad MO C-C	Clone- Clone	h5b3	9.348	129.746	96.104	273.679	15.112
Ecad MO C-C	Clone- Clone	h5b3	9.348	143.146	95.288	525.912	15.112
Ecad MO C-C	Clone- Clone	h5b3	9.348	156.433	96.699	747.787	15.112
Ecad MO C-C	Clone- Clone	h5b3	9.348	174.262	104.371	917.447	15.112
Ecad MO C-C	Clone- Clone	h5b3	9.348	190.962	100.442	1197.215	15.112
Ecad MO C-C	Clone- Clone
Ecad MO C-C	Clone- Clone	h5b4	12.266	140.106	95.463	310.158	19.856
Ecad MO C-C	Clone- Clone	h5b4	12.266	140.509	95.427	327.381	19.856
Ecad MO C-C	Clone- Clone	h5b4	12.266	140.533	98.869	439.322	19.856
Ecad MO C-C	Clone- Clone	h5b4	12.266	142.87	97.878	493.355	19.856
Ecad MO C-C	Clone- Clone	h5b4	12.266	148.898	100.497	406.548	19.856
Ecad MO C-C	Clone- Clone	h5b4	12.266	158.262	101.787	635.992	19.856
Ecad MO C-C	Clone- Clone	h5b4	12.266	177.591	102.685	1078.418	19.856
Ecad MO C-C	Clone- Clone	h5b4	12.266	186.607	100.881	791.273	19.856
Ecad MO C-C	Clone- Clone
Ecad MO C-C	Clone- Clone	h5b5	5.511	126.146	97.038	360.799	8.874
Ecad MO C-C	Clone- Clone	h5b5	5.511	131.132	98.947	318.972	8.874
Ecad MO C-C	Clone- Clone	h5b5	5.511	134.626	98.249	441.457	8.874
Ecad MO C-C	Clone- Clone	h5b5	5.511	136.942	101.003	259.648	8.874
Ecad MO C-C	Clone- Clone	h5b5	5.511	139.478	104.568	221.52	8.874
Ecad MO C-C	Clone- Clone	h5b5	5.511	159.312	107.047	292.065	8.874
Ecad MO C-C	Clone- Clone	h5b5	5.511	177.208	105.292	395.671	8.874
Ecad MO C-C	Clone- Clone	h5b5	5.511	188.76	106.956	531.047	8.874
Ecad MO C-C	Clone- Clone
Ecad MO C-C	Clone- Clone	h5b6	8.105	120.317	96.707	211.27	13.091
Ecad MO C-C	Clone- Clone	h5b6	8.105	129.026	95.937	251.489	13.091
Ecad MO C-C	Clone- Clone	h5b6	8.105	139.087	98.503	431.544	13.091
Ecad MO C-C	Clone- Clone	h5b6	8.105	148.355	99.064	416.476	13.091
Ecad MO C-C	Clone- Clone	h5b6	8.105	154.641	94.865	550.834	13.091
Ecad MO C-C	Clone- Clone	h5b6	8.105	161.009	92.228	657.149	13.091
Ecad MO N-C	Non Clone- Clone	h1b1	12.536	146.628	99.728	324.361	20.295
Ecad MO N-C	Non Clone- Clone	h1b1	12.536	186.092	98.404	473.58	20.295
Ecad MO N-C	Non Clone- Clone	h1b1	12.536	218.913	99.392	782.823	20.295
Ecad MO N-C	Non Clone- Clone	h1b1	12.536	231.333	110.443	748.292	20.295
Ecad MO N-C	Non Clone- Clone	h1b1	12.536	247.004	120.598	640.531	20.295
Ecad MO N-C	Non Clone- Clone	h1b1	12.536	280.501	104.556	1057.233	20.295
Ecad MO N-C	Non Clone- Clone	h1b1	12.536	345.427	116.403	2048.366	20.295
Ecad MO N-C	Non Clone- Clone
Ecad MO N-C	Non Clone- Clone	h1b2	6.592	189.241	109.694	413.413	10.631
Ecad MO N-C	Non Clone- Clone	h1b2	6.592	238.675	111.386	934.053	10.631
Ecad MO N-C	Non Clone- Clone	h1b2	6.592	262.46	126.219	1095.375	10.631
Ecad MO N-C	Non Clone- Clone	h1b2	6.592	278.598	130.408	1214.744	10.631
Ecad MO N-C	Non Clone- Clone	h1b2	6.592	303.195	118.284	1048.291	10.631
Ecad MO N-C	Non Clone- Clone	h1b2	6.592	342.223	120.343	735.47	10.631
Ecad MO N-C	Non Clone- Clone	h1b2	6.592	344.057	118.419	1214.58	10.631
Ecad MO N-C	Non Clone- Clone
Ecad MO N-C	Non Clone- Clone	h1b3	11.293	178.992	98.47	559.277	18.275
Ecad MO N-C	Non Clone- Clone	h1b3	11.293	218.585	101.742	717.925	18.275
Ecad MO N-C	Non Clone- Clone	h1b3	11.293	217.256	100.497	541.132	18.275
Ecad MO N-C	Non Clone- Clone	h1b3	11.293	210.376	103.987	800.534	18.275
Ecad MO N-C	Non Clone- Clone	h1b3	11.293	209.7	101.867	1109.893	18.275
Ecad MO N-C	Non Clone- Clone	h1b3	11.293	216.888	98.087	1034.47	18.275
Ecad MO N-C	Non Clone- Clone	h1b3	11.293	222.623	101.216	1018.677	18.275
Ecad MO N-C	Non Clone- Clone	h1b3	11.293	245.323	105.479	1126.752	18.275
Ecad MO N-C	Non Clone- Clone	h1b3	11.293	262.687	107.318	1307.016	18.275
Ecad MO N-C	Non Clone- Clone	h1b3	11.293	285.196	113.327	1308.859	18.275
Ecad MO N-C	Non Clone- Clone
Ecad MO N-C	Non Clone- Clone	h1b4	6.214	172.327	99.566	329.226	10.016
Ecad MO N-C	Non Clone- Clone	h1b4	6.214	231.907	103.134	574.878	10.016
Ecad MO N-C	Non Clone- Clone	h1b4	6.214	261.143	110.395	940.505	10.016
Ecad MO N-C	Non Clone- Clone	h1b4	6.214	240.94	112.103	767.127	10.016
Ecad MO N-C	Non Clone- Clone	h1b4	6.214	213.983	112.021	527.882	10.016
Ecad MO N-C	Non Clone- Clone	h1b4	6.214	202.939	113.72	489.039	10.016
Ecad MO N-C	Non Clone- Clone	h1b4	6.214	215.886	120.695	620.922	10.016
Ecad MO N-C	Non Clone- Clone	h1b4	6.214	239.028	110.604	639.439	10.016
Ecad MO N-C	Non Clone- Clone
Ecad MO N-C	Non Clone- Clone	h1b5	12.86	176.689	102.898	403.75	20.823
Ecad MO N-C	Non Clone- Clone	h1b5	12.86	221.852	103.79	709.54	20.823
Ecad MO N-C	Non Clone- Clone	h1b5	12.86	230.444	109.073	823.591	20.823
Ecad MO N-C	Non Clone- Clone	h1b5	12.86	221.245	96.38	866.344	20.823
Ecad MO N-C	Non Clone- Clone	h1b5	12.86	302.77	113.976	948.764	20.823
Ecad MO N-C	Non Clone- Clone	h1b5	12.86	347.724	117.056	2358.655	20.823
Ecad MO N-C	Non Clone- Clone	h1b5	12.86	409.335	119.957	4095	20.823
Ecad MO N-C	Non Clone- Clone	h1b5	12.86	450.647	120.585	4066.387	20.823
Ecad MO N-C	Non Clone- Clone	h1b5	12.86	445.864	113.087	2895.143	20.823
Ecad MO N-C	Non Clone- Clone
Ecad MO N-C	Non Clone- Clone	h1b6	8.537	128.216	99.374	218.208	13.794
Ecad MO N-C	Non Clone- Clone	h1b6	8.537	155.613	100.358	336.919	13.794
Ecad MO N-C	Non Clone- Clone	h1b6	8.537	208.182	103.335	759.831	13.794
Ecad MO N-C	Non Clone- Clone	h1b6	8.537	245.719	103.754	1100.807	13.794
Ecad MO N-C	Non Clone- Clone	h1b6	8.537	250.199	102.294	963.247	13.794
Ecad MO N-C	Non Clone- Clone	h1b6	8.537	247.044	99.349	728.664	13.794
Ecad MO N-C	Non Clone- Clone	h1b6	8.537	251.744	118.279	574.157	13.794
Ecad MO N-C	Non Clone- Clone	h1b6	8.537	268.516	133.804	591.632	13.794
Ecad MO N-C	Non Clone- Clone	h1b6	8.537	295.635	130.05	699.543	13.794
Ecad MO N-C	Non Clone- Clone
Ecad MO N-C	Non Clone- Clone	h1b7	2.432	125.326	100.342	230.925	3.866
Ecad MO N-C	Non Clone- Clone	h1b7	2.432	138.694	101.101	245.463	3.866
Ecad MO N-C	Non Clone- Clone	h1b7	2.432	171.702	100.744	380.295	3.866
Ecad MO N-C	Non Clone- Clone	h1b7	2.432	216.334	109.615	751.359	3.866
Ecad MO N-C	Non Clone- Clone	h1b7	2.432	227.277	107.559	782.752	3.866
Ecad MO N-C	Non Clone- Clone	h1b7	2.432	240.608	103.629	771.846	3.866
Ecad MO N-C	Non Clone- Clone	h1b7	2.432	246.593	113.119	655.377	3.866
Ecad MO N-C	Non Clone- Clone	h1b7	2.432	298.198	121.638	764.024	3.866
Ecad MO N-C	Non Clone- Clone	h1b7	2.432	338.962	127	927.764	3.866
Ecad MO N-C	Non Clone- Clone
Ecad MO N-C	Non Clone- Clone	h1b8	7.943	191.702	102.656	436.421	12.827
Ecad MO N-C	Non Clone- Clone	h1b8	7.943	248.037	112.832	697.328	12.827
Ecad MO N-C	Non Clone- Clone	h1b8	7.943	265.405	112.053	872.517	12.827
Ecad MO N-C	Non Clone- Clone	h1b8	7.943	263.875	110.132	1034.555	12.827
Ecad MO N-C	Non Clone- Clone	h1b8	7.943	257.34	112.635	1093.665	12.827
Ecad MO N-C	Non Clone- Clone	h1b8	7.943	265.424	123.244	927.842	12.827
Ecad MO N-C	Non Clone- Clone	h1b8	7.943	298.539	116.402	1311.313	12.827
Ecad MO N-C	Non Clone- Clone	h1b8	7.943	335.798	132.993	1018.187	12.827
Ecad MO N-C	Non Clone- Clone	h1b8	7.943	354.567	127.676	1088.184	12.827
Ecad MO N-C	Non Clone- Clone
Ecad MO N-C	Non Clone- Clone	h1b9	9.132	269.77	105.13	668.08	14.76
Ecad MO N-C	Non Clone- Clone	h1b9	9.132	261.342	118.608	969.694	14.76
Ecad MO N-C	Non Clone- Clone	h1b9	9.132	249.27	123.206	976.846	14.76
Ecad MO N-C	Non Clone- Clone	h1b9	9.132	240.528	133.012	562.196	14.76
Ecad MO N-C	Non Clone- Clone	h1b9	9.132	256.004	125.366	570.538	14.76
Ecad MO N-C	Non Clone- Clone	h1b9	9.132	315.698	137.44	772.942	14.76
Ecad MO N-C	Non Clone- Clone	h1b9	9.132	359.009	145.839	986.105	14.76
Ecad MO N-C	Non Clone- Clone	h1b9	9.132	362.887	134.702	1067.459	14.76
Ecad MO N-C	Non Clone- Clone
Ecad MO N-C	Non Clone- Clone	h1b10	8.862	172.802	101.956	374.957	14.321
Ecad MO N-C	Non Clone- Clone	h1b10	8.862	210.326	101.114	752.071	14.321
Ecad MO N-C	Non Clone- Clone	h1b10	8.862	230.685	107.594	893.798	14.321
Ecad MO N-C	Non Clone- Clone	h1b10	8.862	244.459	107.627	781.111	14.321
Ecad MO N-C	Non Clone- Clone	h1b10	8.862	269.179	115.605	827.671	14.321
Ecad MO N-C	Non Clone- Clone	h1b10	8.862	315.515	125.54	1015.744	14.321
Ecad MO N-C	Non Clone- Clone	h1b10	8.862	377.693	121.986	1313.213	14.321
Ecad MO N-C	Non Clone- Clone	h1b10	8.862	388.931	117.223	1142.6	14.321
Ecad MO N-C	Non Clone- Clone
Ecad MO N-C	Non Clone- Clone	h1b11	10.537	170.317	105.412	355.925	17.045
Ecad MO N-C	Non Clone- Clone	h1b11	10.537	227.056	107.312	776.024	17.045
Ecad MO N-C	Non Clone- Clone	h1b11	10.537	250.927	109.156	918.635	17.045
Ecad MO N-C	Non Clone- Clone	h1b11	10.537	247.557	105.708	775.382	17.045
Ecad MO N-C	Non Clone- Clone	h1b11	10.537	235.547	108.104	675.68	17.045
Ecad MO N-C	Non Clone- Clone	h1b11	10.537	223.826	113.503	566.327	17.045
Ecad MO N-C	Non Clone- Clone	h1b11	10.537	246.195	117.947	863.631	17.045
Ecad MO N-C	Non Clone- Clone	h1b11	10.537	306.973	124.384	1251.812	17.045
Ecad MO N-C	Non Clone- Clone
Ecad MO N-C	Non Clone- Clone	h1b12	7.511	142.778	100.834	258.802	12.125
Ecad MO N-C	Non Clone- Clone	h1b12	7.511	180.398	106.974	399.453	12.125
Ecad MO N-C	Non Clone- Clone	h1b12	7.511	216.973	112.992	552.463	12.125
Ecad MO N-C	Non Clone- Clone	h1b12	7.511	217.179	117.361	550.175	12.125
Ecad MO N-C	Non Clone- Clone	h1b12	7.511	218.393	120.212	644.728	12.125
Ecad MO N-C	Non Clone- Clone	h1b12	7.511	235.709	118.184	579.416	12.125
Ecad MO N-C	Non Clone- Clone	h1b12	7.511	280.426	132.557	639.26	12.125
Ecad MO N-C	Non Clone- Clone	h1b12	7.511	342.562	123.507	957.03	12.125
Ecad MO N-C	Non Clone- Clone
Ecad MO N-C	Non Clone- Clone	h1b13	5.133	176.975	99.085	360.641	8.259
Ecad MO N-C	Non Clone- Clone	h1b13	5.133	232.024	107.584	687.696	8.259
Ecad MO N-C	Non Clone- Clone	h1b13	5.133	278.108	114.488	791.821	8.259
Ecad MO N-C	Non Clone- Clone	h1b13	5.133	321.407	129.199	787.531	8.259
Ecad MO N-C	Non Clone- Clone	h1b13	5.133	364.688	133.499	979.534	8.259
Ecad MO N-C	Non Clone- Clone	h1b13	5.133	427.642	130.714	1242.311	8.259
Ecad MO N-C	Non Clone- Clone	h1b13	5.133	422.427	135.913	1430.052	8.259
Ecad MO N-C	Non Clone- Clone	h1b13	5.133	406.197	125.653	1767.037	8.259
Ecad MO N-C	Non Clone- Clone
Ecad MO N-C	Non Clone- Clone	h1b14	6.97	259.767	122.161	812.072	11.183
Ecad MO N-C	Non Clone- Clone	h1b14	6.97	274.797	137.803	868.782	11.183
Ecad MO N-C	Non Clone- Clone	h1b14	6.97	291.798	133.462	633.542	11.183
Ecad MO N-C	Non Clone- Clone	h1b14	6.97	336.826	139.403	908	11.183
Ecad MO N-C	Non Clone- Clone	h1b14	6.97	422.688	143.292	1929.976	11.183
Ecad MO N-C	Non Clone- Clone	h1b14	6.97	448.384	148.29	2040.342	11.183
Ecad MO N-C	Non Clone- Clone
Ecad MO N-C	Non Clone- Clone	h1b15	5.836	179.717	104.293	485.457	9.401
Ecad MO N-C	Non Clone- Clone	h1b15	5.836	249.061	112.676	645.296	9.401
Ecad MO N-C	Non Clone- Clone	h1b15	5.836	282.147	129.751	639.923	9.401
Ecad MO N-C	Non Clone- Clone	h1b15	5.836	285.875	119.149	824.66	9.401
Ecad MO N-C	Non Clone- Clone	h1b15	5.836	281.264	129.975	929.091	9.401
Ecad MO N-C	Non Clone- Clone	h1b15	5.836	306.201	145.056	906.655	9.401
Ecad MO N-C	Non Clone- Clone	h1b15	5.836	343.482	128.122	1008.335	9.401
Ecad MO N-C	Non Clone- Clone	h2b1	14.859	221.858	110.194	775.364	24.073
Ecad MO N-C	Non Clone- Clone	h2b1	14.859	277.575	110.743	948.287	24.073
Ecad MO N-C	Non Clone- Clone	h2b1	14.859	337.114	121.073	984.302	24.073
Ecad MO N-C	Non Clone- Clone	h2b1	14.859	395.537	142.183	1221.421	24.073
Ecad MO N-C	Non Clone- Clone	h2b1	14.859	432.016	141.759	1668.16	24.073
Ecad MO N-C	Non Clone- Clone
Ecad MO N-C	Non Clone- Clone	h2b2	5.511	257.621	111.283	885.858	8.874
Ecad MO N-C	Non Clone- Clone	h2b2	5.511	317.069	125.832	1454.347	8.874
Ecad MO N-C	Non Clone- Clone	h2b2	5.511	363.838	150.077	1158.236	8.874
Ecad MO N-C	Non Clone- Clone
Ecad MO N-C	Non Clone- Clone	h2b3	7.889	219.387	119.652	507.688	12.74
Ecad MO N-C	Non Clone- Clone	h2b3	7.889	299.697	131.669	993.2	12.74
Ecad MO N-C	Non Clone- Clone	h2b3	7.889	385.694	174.098	1556.777	12.74
Ecad MO N-C	Non Clone- Clone	h2b3	7.889	497.701	212.63	1145.516	12.74
Ecad MO N-C	Non Clone- Clone
Ecad MO N-C	Non Clone- Clone	h2b4	8.267	234.729	128.763	497.868	13.355
Ecad MO N-C	Non Clone- Clone	h2b4	8.267	333.391	138.678	1131.58	13.355
Ecad MO N-C	Non Clone- Clone	h2b4	8.267	411.874	133.498	1475.678	13.355
Ecad MO N-C	Non Clone- Clone	h2b4	8.267	501.82	180.613	1801.872	13.355
Ecad MO N-C	Non Clone- Clone
Ecad MO N-C	Non Clone- Clone	h2b5	5.133	196.843	109.69	554.031	8.259
Ecad MO N-C	Non Clone- Clone	h2b5	5.133	262.192	117.685	601.782	8.259
Ecad MO N-C	Non Clone- Clone	h2b5	5.133	301.193	119.59	1052.214	8.259
Ecad MO N-C	Non Clone- Clone	h2b5	5.133	364.459	179.106	810.244	8.259
Ecad MO N-C	Non Clone- Clone	h2b5	5.133	417.596	165.338	1001.338	8.259
Ecad MO N-C	Non Clone- Clone	h2b5	5.133	477.592	170.468	1813.834	8.259
Ecad MO N-C	Non Clone- Clone
Ecad MO N-C	Non Clone- Clone	h2b6	13.13	183.705	102.815	439.783	21.262
Ecad MO N-C	Non Clone- Clone	h2b6	13.13	234.281	106.911	895.962	21.262
Ecad MO N-C	Non Clone- Clone	h2b6	13.13	266.818	110.907	1172.766	21.262
Ecad MO N-C	Non Clone- Clone	h2b6	13.13	277.12	123.334	1137.414	21.262
Ecad MO N-C	Non Clone- Clone	h2b6	13.13	298.35	129.391	1082.404	21.262
Ecad MO N-C	Non Clone- Clone
Ecad MO N-C	Non Clone- Clone	h2b7	8.105	200.257	101.991	504.082	13.091
Ecad MO N-C	Non Clone- Clone	h2b7	8.105	252.299	104.268	939.249	13.091
Ecad MO N-C	Non Clone- Clone	h2b7	8.105	274.416	119.267	1139.245	13.091
Ecad MO N-C	Non Clone- Clone	h2b7	8.105	253.485	118.651	1128.698	13.091
Ecad MO N-C	Non Clone- Clone	h2b7	8.105	292.279	123.189	1031.379	13.091
Ecad MO N-C	Non Clone- Clone	h2b7	8.105	371.001	126.282	1867.843	13.091
Ecad MO N-C	Non Clone- Clone
Ecad MO N-C	Non Clone- Clone	h2b8	8.645	243.521	119.919	687.738	13.97
Ecad MO N-C	Non Clone- Clone	h2b8	8.645	265.154	111.719	601.041	13.97
Ecad MO N-C	Non Clone- Clone	h2b8	8.645	271.756	134.929	579.701	13.97
Ecad MO N-C	Non Clone- Clone	h2b8	8.645	330.821	147.861	1072.675	13.97
Ecad MO N-C	Non Clone- Clone	h2b8	8.645	438.555	153.878	1962.664	13.97
Ecad MO N-C	Non Clone- Clone
Ecad MO N-C	Non Clone- Clone	h2b9	8.483	264.175	134.75	679.475	13.706
Ecad MO N-C	Non Clone- Clone	h2b9	8.483	303.837	170.68	618.518	13.706
Ecad MO N-C	Non Clone- Clone	h2b9	8.483	362.365	159.328	1072.837	13.706
Ecad MO N-C	Non Clone- Clone	h2b9	8.483	416.181	141.311	1598.648	13.706
Ecad MO N-C	Non Clone- Clone	h2b9	8.483	490.751	144.423	2069.997	13.706
Ecad MO N-C	Non Clone- Clone	h3b1	6.214	153.187	101.2	261.778	10.016
Ecad MO N-C	Non Clone- Clone	h3b1	6.214	179.443	102.822	338.244	10.016
Ecad MO N-C	Non Clone- Clone	h3b1	6.214	197.053	104.491	436.418	10.016
Ecad MO N-C	Non Clone- Clone	h3b1	6.214	210.826	105.932	591.292	10.016
Ecad MO N-C	Non Clone- Clone	h3b1	6.214	207.457	104.766	607.513	10.016
Ecad MO N-C	Non Clone- Clone	h3b1	6.214	191.723	107.326	557.02	10.016
Ecad MO N-C	Non Clone- Clone	h3b1	6.43	296.361	118.454	1352.939	10.367
Ecad MO N-C	Non Clone- Clone	h3b1	6.43	275.12	118.47	1257.014	10.367
Ecad MO N-C	Non Clone- Clone	h3b1	6.43	267.276	127.594	1355.976	10.367
Ecad MO N-C	Non Clone- Clone	h3b1	6.43	256.885	116.365	1234.824	10.367
Ecad MO N-C	Non Clone- Clone	h3b1	6.43	256.121	119.69	1128.699	10.367
Ecad MO N-C	Non Clone- Clone	h3b1	6.43	261.937	124.169	1071.224	10.367
Ecad MO N-C	Non Clone- Clone
Ecad MO N-C	Non Clone- Clone	h3b2	10.483	220.045	106.538	574.085	16.957
Ecad MO N-C	Non Clone- Clone	h3b2	10.483	261.664	107.116	883.471	16.957
Ecad MO N-C	Non Clone- Clone	h3b2	10.483	303.751	114.783	1372.406	16.957
Ecad MO N-C	Non Clone- Clone	h3b2	10.483	332.825	126.105	1689.067	16.957
Ecad MO N-C	Non Clone- Clone	h3b2	10.483	345.478	122.649	1600.817	16.957
Ecad MO N-C	Non Clone- Clone	h3b2	10.483	335.608	123.609	1275.738	16.957
Ecad MO N-C	Non Clone- Clone	h3b2	10.483	323.618	119.306	1277.666	16.957
Ecad MO N-C	Non Clone- Clone	h3b2	10.483	323.16	132.135	1373.136	16.957
Ecad MO N-C	Non Clone- Clone	h3b2	10.483	325.106	126.174	1174.316	16.957
Ecad MO N-C	Non Clone- Clone
Ecad MO N-C	Non Clone- Clone	h3b3	4.809	222.646	108.236	527.595	7.732
Ecad MO N-C	Non Clone- Clone	h3b3	4.809	267.028	123.017	689.595	7.732
Ecad MO N-C	Non Clone- Clone	h3b3	4.809	318.208	137.168	879.093	7.732
Ecad MO N-C	Non Clone- Clone	h3b3	4.809	386.096	129.087	1552.124	7.732
Ecad MO N-C	Non Clone- Clone	h3b3	4.809	450.687	158.758	1876.242	7.732
Ecad MO N-C	Non Clone- Clone	h3b3	4.809	487.076	166.207	1840.263	7.732
Ecad MO N-C	Non Clone- Clone	h3b3	4.809	517.644	174.02	1835.982	7.732
Ecad MO N-C	Non Clone- Clone	h3b3	4.809	549.188	154.256	2196.532	7.732
Ecad MO N-C	Non Clone- Clone	h3b3	4.809	545.747	142.861	2331.022	7.732
Ecad MO N-C	Non Clone- Clone
Ecad MO N-C	Non Clone- Clone	h3b4	9.942	242.403	121.092	534.754	16.078
Ecad MO N-C	Non Clone- Clone	h3b4	9.942	288.702	125.906	877.483	16.078
Ecad MO N-C	Non Clone- Clone	h3b4	9.942	310.156	136.543	1311.778	16.078
Ecad MO N-C	Non Clone- Clone	h3b4	9.942	328.565	118.786	1548.565	16.078
Ecad MO N-C	Non Clone- Clone	h3b4	10.266	386.052	156.797	1569.874	16.605
Ecad MO N-C	Non Clone- Clone	h3b4	10.266	411.787	162.894	1384.385	16.605
Ecad MO N-C	Non Clone- Clone	h3b4	10.266	417.502	180.597	1020.036	16.605
Ecad MO N-C	Non Clone- Clone	h3b4	10.266	435.705	182.635	1218.581	16.605
Ecad MO N-C	Non Clone- Clone	h3b4	10.266	468.504	174.023	1627.574	16.605
Ecad MO N-C	Non Clone- Clone	h3b4	10.266	515.791	164.325	1314.041	16.605
Ecad MO N-C	Non Clone- Clone	h3b4	10.266	499.848	166.981	1886.557	16.605
Ecad MO N-C	Non Clone- Clone
Ecad MO N-C	Non Clone- Clone	h3b5	11.509	181.877	102.599	523.388	18.626
Ecad MO N-C	Non Clone- Clone	h3b5	11.509	210.852	105.123	874.972	18.626
Ecad MO N-C	Non Clone- Clone	h3b5	11.509	236.751	109.869	1293.109	18.626
Ecad MO N-C	Non Clone- Clone	h3b5	11.509	256.963	118.59	1617.371	18.626
Ecad MO N-C	Non Clone- Clone	h3b5	11.509	276.431	136.487	1245.24	18.626
Ecad MO N-C	Non Clone- Clone	h3b5	11.509	295.67	111.434	928.132	18.626
Ecad MO N-C	Non Clone- Clone	h3b5	11.509	313.925	112.22	811.612	18.626
Ecad MO N-C	Non Clone- Clone	h3b5	11.509	353.105	140.956	1404.771	18.626
Ecad MO N-C	Non Clone- Clone	h3b5	11.509	415.823	146.756	2197.15	18.626
Ecad MO N-C	Non Clone- Clone	h3b5	11.509	445.518	152.764	2034.05	18.626
Ecad MO N-C	Non Clone- Clone
Ecad MO N-C	Non Clone- Clone	h3b6	4.431	212.37	110.421	547.306	7.117
Ecad MO N-C	Non Clone- Clone	h3b6	4.431	266.456	122.395	973.133	7.117
Ecad MO N-C	Non Clone- Clone	h3b6	4.431	314.563	127.664	1564.165	7.117
Ecad MO N-C	Non Clone- Clone	h3b6	4.431	344.061	121.407	1877.619	7.117
Ecad MO N-C	Non Clone- Clone	h3b6	4.431	346.961	129.919	1776.759	7.117
Ecad MO N-C	Non Clone- Clone	h3b6	4.431	330.437	127.472	1413.372	7.117
Ecad MO N-C	Non Clone- Clone	h3b6	4.431	321.702	123.162	1292.644	7.117
Ecad MO N-C	Non Clone- Clone	h3b6	4.431	319.723	137.979	834.849	7.117
Ecad MO N-C	Non Clone- Clone
Ecad MO N-C	Non Clone- Clone	h3b7	11.725	206.536	106.498	476.187	18.978
Ecad MO N-C	Non Clone- Clone	h3b7	11.725	242.254	112.297	596.859	18.978
Ecad MO N-C	Non Clone- Clone	h3b7	11.725	259.873	109.491	553.84	18.978
Ecad MO N-C	Non Clone- Clone	h3b7	11.725	264.429	107.489	845.919	18.978
Ecad MO N-C	Non Clone- Clone	h3b7	11.671	373.497	133.417	1638.536	18.89
Ecad MO N-C	Non Clone- Clone	h3b7	11.671	422.524	151.955	2383.505	18.89
Ecad MO N-C	Non Clone- Clone	h3b7	11.671	471.678	166.461	2844.43	18.89
Ecad MO N-C	Non Clone- Clone	h3b7	11.671	564.003	154.522	4003.924	18.89
Ecad MO N-C	Non Clone- Clone	h3b7	11.671	635.331	197.395	3820.792	18.89
Ecad MO N-C	Non Clone- Clone	h3b7	11.671	583.702	150.041	3117.667	18.89
Ecad MO N-C	Non Clone- Clone
Ecad MO N-C	Non Clone- Clone	h3b8	12.212	202.077	115.113	385.514	19.768
Ecad MO N-C	Non Clone- Clone	h3b8	12.212	248.739	113.594	637.238	19.768
Ecad MO N-C	Non Clone- Clone	h3b8	12.212	304.129	114.417	929.906	19.768
Ecad MO N-C	Non Clone- Clone	h3b8	12.212	333.043	129.327	1153.119	19.768
Ecad MO N-C	Non Clone- Clone	h3b8	12.212	363.026	130.604	1949.056	19.768
Ecad MO N-C	Non Clone- Clone	h3b8	12.212	396.157	139.78	1017.337	19.768
Ecad MO N-C	Non Clone- Clone	h3b8	12.212	402.69	147.305	1302.741	19.768
Ecad MO N-C	Non Clone- Clone	h3b8	12.212	399.621	154.636	1290.271	19.768
Ecad MO N-C	Non Clone- Clone
Ecad MO N-C	Non Clone- Clone	h3b9	7.565	214.644	110.777	635.093	12.212
Ecad MO N-C	Non Clone- Clone	h3b9	7.565	262.536	104.148	896.992	12.212
Ecad MO N-C	Non Clone- Clone	h3b9	7.565	280.977	118.43	1110.414	12.212
Ecad MO N-C	Non Clone- Clone	h3b9	7.565	297.095	121.118	1061.206	12.212
Ecad MO N-C	Non Clone- Clone	h3b9	7.565	297.877	139.108	766.155	12.212
Ecad MO N-C	Non Clone- Clone	h3b9	7.565	301.065	122.387	742.038	12.212
Ecad MO N-C	Non Clone- Clone	h3b9	7.565	298.718	121.032	901.605	12.212
Ecad MO N-C	Non Clone- Clone
Ecad MO N-C	Non Clone- Clone	h3b10	4.323	163.226	103.272	311.685	6.941
Ecad MO N-C	Non Clone- Clone	h3b10	4.323	184.583	111.603	425.309	6.941
Ecad MO N-C	Non Clone- Clone	h3b10	4.323	230.931	121.003	680.561	6.941
Ecad MO N-C	Non Clone- Clone	h3b10	4.323	276.686	132.022	814.525	6.941
Ecad MO N-C	Non Clone- Clone	h3b10	4.323	350.93	135.626	1097.346	6.941
Ecad MO N-C	Non Clone- Clone	h3b10	4.323	462.606	153.172	1475.801	6.941
Ecad MO N-C	Non Clone- Clone	h3b10	4.323	502.337	149.997	1629.799	6.941
Ecad MO N-C	Non Clone- Clone	h3b10	4.323	513.744	170.718	1853.026	6.941
Ecad MO N-C	Non Clone- Clone
Ecad MO N-C	Non Clone- Clone	h3b11	13.022	144.662	100.215	341.916	21.086
Ecad MO N-C	Non Clone- Clone	h3b11	13.022	160.858	101.015	404.67	21.086
Ecad MO N-C	Non Clone- Clone	h3b11	13.022	176.374	100.346	417.108	21.086
Ecad MO N-C	Non Clone- Clone	h3b11	13.022	185.625	100.459	486.54	21.086
Ecad MO N-C	Non Clone- Clone	h3b11	13.022	202.268	108.247	518.649	21.086
Ecad MO N-C	Non Clone- Clone	h3b11	13.022	224.513	111.635	795.578	21.086
Ecad MO N-C	Non Clone- Clone	h3b11	13.022	239.7	119.282	915.746	21.086
Ecad MO N-C	Non Clone- Clone	h3b11	13.022	261.355	104.978	937.783	21.086
Ecad MO N-C	Non Clone- Clone	h3b11	13.022	281.568	114.942	887.899	21.086
Ecad MO N-C	Non Clone- Clone
Ecad MO N-C	Non Clone- Clone	h3b12	2.594	241.244	117.354	768.248	4.112
Ecad MO N-C	Non Clone- Clone	h3b12	2.594	297.459	115.367	766.751	4.112
Ecad MO N-C	Non Clone- Clone	h3b12	2.594	332.303	130.132	1067.081	4.112
Ecad MO N-C	Non Clone- Clone	h3b12	2.594	384.185	136.484	1604.737	4.112
Ecad MO N-C	Non Clone- Clone	h3b12	2.594	419.438	146.454	1298.103	4.112
Ecad MO N-C	Non Clone- Clone	h3b12	2.594	413.52	138.02	1032.743	4.112
Ecad MO N-C	Non Clone- Clone	h3b12	2.594	379.492	128.68	1094.253	4.112
Ecad MO N-C	Non Clone- Clone	h4b1	11.455	198.112	102.071	1061.694	18.538
Ecad MO N-C	Non Clone- Clone	h4b1	11.455	220.413	103.711	1041.294	18.538
Ecad MO N-C	Non Clone- Clone	h4b1	11.455	244.865	107.419	733.285	18.538
Ecad MO N-C	Non Clone- Clone	h4b1	11.455	249.971	113.848	637.69	18.538
Ecad MO N-C	Non Clone- Clone
Ecad MO N-C	Non Clone- Clone	h4b2	12.59	249.44	111.867	717.318	20.383
Ecad MO N-C	Non Clone- Clone	h4b2	12.59	274.088	113.679	671.222	20.383
Ecad MO N-C	Non Clone- Clone	h4b2	12.59	282.13	117.071	783.03	20.383
Ecad MO N-C	Non Clone- Clone	h4b2	12.59	285.298	114.207	1178.66	20.383
Ecad MO N-C	Non Clone- Clone	h4b2	12.59	295.21	122.362	1481.702	20.383
Ecad MO N-C	Non Clone- Clone	h4b2	12.59	298.721	120.84	1463.904	20.383
Ecad MO N-C	Non Clone- Clone
Ecad MO N-C	Non Clone- Clone	h4b3	12.59	157.314	96.976	532.063	20.383
Ecad MO N-C	Non Clone- Clone	h4b3	12.59	185.709	99.492	793.722	20.383
Ecad MO N-C	Non Clone- Clone	h4b3	12.59	214.211	98.433	1198.466	20.383
Ecad MO N-C	Non Clone- Clone	h4b3	12.59	235.099	105.225	1692.239	20.383
Ecad MO N-C	Non Clone- Clone	h4b3	12.59	246.69	105.566	1729.788	20.383
Ecad MO N-C	Non Clone- Clone	h4b3	12.59	270.212	109.321	1687.784	20.383
Ecad MO N-C	Non Clone- Clone	h4b3	12.59	286.555	107.82	1486.326	20.383
Ecad MO N-C	Non Clone- Clone	h4b3	12.59	283.651	107.688	1358.228	20.383
Ecad MO N-C	Non Clone- Clone
Ecad MO N-C	Non Clone- Clone	h4b4	10.645	171.374	100.826	450.547	17.22
Ecad MO N-C	Non Clone- Clone	h4b4	10.645	188.919	100.14	447.863	17.22
Ecad MO N-C	Non Clone- Clone	h4b4	10.645	202.159	101.473	618.489	17.22
Ecad MO N-C	Non Clone- Clone	h4b4	10.645	210.463	101.704	655.555	17.22
Ecad MO N-C	Non Clone- Clone	h4b4	10.645	227.856	113.135	1170.334	17.22
Ecad MO N-C	Non Clone- Clone	h4b4	10.645	243.566	113.504	1580.137	17.22
Ecad MO N-C	Non Clone- Clone	h4b4	10.645	238.941	106.072	944.944	17.22
Ecad MO N-C	Non Clone- Clone
Ecad MO N-C	Non Clone- Clone	h4b5	6.16	171.491	107.503	572.798	9.928
Ecad MO N-C	Non Clone- Clone	h4b5	6.16	195.7	103.088	528.028	9.928
Ecad MO N-C	Non Clone- Clone	h4b5	6.16	207.513	104.77	675.86	9.928
Ecad MO N-C	Non Clone- Clone	h4b5	6.16	209.152	112.699	739.056	9.928
Ecad MO N-C	Non Clone- Clone	h4b5	6.16	211.78	112.223	794.818	9.928
Ecad MO N-C	Non Clone- Clone	h4b5	6.16	215.709	105.392	614.105	9.928
Ecad MO N-C	Non Clone- Clone	h4b5	6.16	231.574	112.399	699.344	9.928
Ecad MO N-C	Non Clone- Clone
Ecad MO N-C	Non Clone- Clone	h4b6	16.48	176.421	99.129	577.21	26.709
Ecad MO N-C	Non Clone- Clone	h4b6	16.48	197.96	102.125	667.121	26.709
Ecad MO N-C	Non Clone- Clone	h4b6	16.48	217.651	98.236	764.414	26.709
Ecad MO N-C	Non Clone- Clone	h4b6	16.48	231.432	103.896	816.932	26.709
Ecad MO N-C	Non Clone- Clone	h4b6	16.48	262.487	107.674	939.428	26.709
Ecad MO N-C	Non Clone- Clone	h4b6	16.48	289.096	116.535	1202.044	26.709
Ecad MO N-C	Non Clone- Clone	h4b6	16.48	296.764	121.972	1116.665	26.709
Ecad MO N-C	Non Clone- Clone
Ecad MO N-C	Non Clone- Clone	h4b7	11.401	164.592	96.491	636.352	18.45
Ecad MO N-C	Non Clone- Clone	h4b7	11.401	174.391	98.127	713.712	18.45
Ecad MO N-C	Non Clone- Clone	h4b7	11.401	181.891	95.433	680.271	18.45
Ecad MO N-C	Non Clone- Clone	h4b7	11.401	201.96	95.972	669.79	18.45
Ecad MO N-C	Non Clone- Clone	h4b7	11.401	230.312	96.939	637.169	18.45
Ecad MO N-C	Non Clone- Clone	h4b7	11.401	230.312	96.939	637.169	18.45
Ecad MO N-C	Non Clone- Clone	h4b7	11.401	252.707	97.644	702.207	18.45
Ecad MO N-C	Non Clone- Clone	h4b7	11.401	265.969	98.102	762.489	18.45
Ecad MO N-C	Non Clone- Clone	h4b7	11.401	258.791	104.972	747.686	18.45
Ecad MO N-C	Non Clone- Clone	h5b1	6.268	142.538	98.667	355.567	10.104
Ecad MO N-C	Non Clone- Clone	h5b1	6.268	150.539	101.25	587.513	10.104
Ecad MO N-C	Non Clone- Clone	h5b1	6.268	157.288	99.107	749.66	10.104
Ecad MO N-C	Non Clone- Clone	h5b1	6.268	159.55	100.315	360.888	10.104
Ecad MO N-C	Non Clone- Clone	h5b1	6.268	165.258	97.941	600.517	10.104
Ecad MO N-C	Non Clone- Clone	h5b1	6.268	165.907	97.033	546.319	10.104
Ecad MO N-C	Non Clone- Clone
Ecad MO N-C	Non Clone- Clone	h5b2	6.16	182.334	100.537	653.5	9.928
Ecad MO N-C	Non Clone- Clone	h5b2	6.16	201.096	102.003	886.226	9.928
Ecad MO N-C	Non Clone- Clone	h5b2	6.16	211.128	103.161	773.117	9.928
Ecad MO N-C	Non Clone- Clone	h5b2	6.16	223.187	106.17	943.142	9.928
Ecad MO N-C	Non Clone- Clone	h5b2	6.16	237.468	103.173	1105.407	9.928
Ecad MO N-C	Non Clone- Clone	h5b2	6.16	250.836	102.593	1321.608	9.928
Ecad MO N-C	Non Clone- Clone	h5b2	6.16	259.384	98.515	2230.929	9.928
Ecad MO N-C	Non Clone- Clone
Ecad MO N-C	Non Clone- Clone	h5b3	13.076	171.668	102.048	344.248	21.174
Ecad MO N-C	Non Clone- Clone	h5b3	13.076	183.876	102.17	487.172	21.174
Ecad MO N-C	Non Clone- Clone	h5b3	13.076	198.58	105.361	633.425	21.174
Ecad MO N-C	Non Clone- Clone	h5b3	13.076	222.473	106.791	1105.343	21.174
Ecad MO N-C	Non Clone- Clone	h5b3	13.076	221.333	108.778	719.7	21.174
Ecad MO N-C	Non Clone- Clone
Ecad MO N-C	Non Clone- Clone	h5b4	10.375	154.009	97.327	427.046	16.781
Ecad MO N-C	Non Clone- Clone	h5b4	10.375	159.338	98.503	472.54	16.781
Ecad MO N-C	Non Clone- Clone	h5b4	10.375	166.078	98.884	416.803	16.781
Ecad MO N-C	Non Clone- Clone	h5b4	10.375	181.907	101.14	605.989	16.781
Ecad MO N-C	Non Clone- Clone	h5b4	10.375	203.222	97.311	698.152	16.781
Ecad MO N-C	Non Clone- Clone	h5b4	10.375	251.609	107.02	1557.046	16.781
Ecad MO N-C	Non Clone- Clone	h5b4	10.375	285.542	102.999	2513.157	16.781
Ecad MO N-C	Non Clone- Clone	h5b4	10.375	270.865	105.597	1498.075	16.781
Ecad MO N-C	Non Clone- Clone
Ecad MO N-C	Non Clone- Clone	h5b5	7.457	154.519	96.143	546.802	12.037
Ecad MO N-C	Non Clone- Clone	h5b5	7.457	165.793	98.354	589.818	12.037
Ecad MO N-C	Non Clone- Clone	h5b5	7.457	168.824	97.659	655.228	12.037
Ecad MO N-C	Non Clone- Clone	h5b5	7.457	166.498	97.942	561.418	12.037
Ecad MO N-C	Non Clone- Clone	h5b5	7.457	168.52	101.057	579.056	12.037
Ecad MO N-C	Non Clone- Clone	h5b5	7.457	171.649	100.328	587.215	12.037
Ecad MO N-C	Non Clone- Clone
Ecad MO N-C	Non Clone- Clone	h5b6	15.076	146.385	86.245	442.128	24.425
Ecad MO N-C	Non Clone- Clone	h5b6	15.076	161.565	98.949	607.694	24.425
Ecad MO N-C	Non Clone- Clone	h5b6	15.076	172.313	96.274	680.537	24.425
Ecad MO N-C	Non Clone- Clone	h5b6	15.076	176.933	98.042	513.295	24.425
Ecad MO N-C	Non Clone- Clone	h5b6	15.076	179.074	101.653	407.641	24.425
Ecad MO N-C	Non Clone- Clone	h5b6	15.076	182.515	107.904	520.912	24.425
Ecad MO N-C	Non Clone- Clone	h5b6	15.076	188.678	102.748	568.105	24.425
Ecad MO N-C	Non Clone- Clone	h5b6	15.076	200.312	107.172	750.612	24.425
Ecad MO N-C	Non Clone- Clone
Ecad MO N-C	Non Clone- Clone	h5b7	9.618	154.574	99.902	420.483	15.551
Ecad MO N-C	Non Clone- Clone	h5b7	9.618	149.383	100.509	395.287	15.551
Ecad MO N-C	Non Clone- Clone	h5b7	9.618	150.251	100.97	414.058	15.551
Ecad MO N-C	Non Clone- Clone	h5b7	9.618	154.124	100.789	350.32	15.551
Ecad MO N-C	Non Clone- Clone	h5b7	9.618	161.781	100.645	447.966	15.551
Ecad MO N-C	Non Clone- Clone	h5b7	9.618	170.401	101.145	603.413	15.551
Ecad MO N-C	Non Clone- Clone	h5b7	9.618	171.769	102.077	514.303	15.551
Ecad MO N-N	Non Clone- Non Clone	h1b1	12.806	238.797	101.049	1206.316	20.735
Ecad MO N-N	Non Clone- Non Clone	h1b1	12.806	255.741	104.449	1477.529	20.735
Ecad MO N-N	Non Clone- Non Clone	h1b1	12.806	269.888	104.004	1417.333	20.735
Ecad MO N-N	Non Clone- Non Clone	h1b1	12.806	286.175	106.074	1633.194	20.735
Ecad MO N-N	Non Clone- Non Clone	h1b1	12.806	304.069	135.128	1579.889	20.735
Ecad MO N-N	Non Clone- Non Clone	h1b1	12.806	303.871	135.079	1182.909	20.735
Ecad MO N-N	Non Clone- Non Clone	h1b1	12.806	306.091	135.248	1217.717	20.735
Ecad MO N-N	Non Clone- Non Clone
Ecad MO N-N	Non Clone- Non Clone	h1b2	7.889	155.137	100.136	582.899	12.739
Ecad MO N-N	Non Clone- Non Clone	h1b2	7.889	162.829	101.993	763.884	12.739
Ecad MO N-N	Non Clone- Non Clone	h1b2	7.889	167.644	101.778	655.508	12.739
Ecad MO N-N	Non Clone- Non Clone	h1b2	7.889	165.838	104.439	738.195	12.739
Ecad MO N-N	Non Clone- Non Clone	h1b2	7.889	169.73	105.039	633.972	12.739
Ecad MO N-N	Non Clone- Non Clone	h1b2	7.889	186.139	102.317	643.13	12.739
Ecad MO N-N	Non Clone- Non Clone	h1b2	7.889	204.006	109.078	580.032	12.739
Ecad MO N-N	Non Clone- Non Clone
Ecad MO N-N	Non Clone- Non Clone	h1b3	2.972	165.829	99.471	417.074	4.744
Ecad MO N-N	Non Clone- Non Clone	h1b3	2.972	217.704	103.833	728.418	4.744
Ecad MO N-N	Non Clone- Non Clone	h1b3	2.972	222.131	116.195	890.163	4.744
Ecad MO N-N	Non Clone- Non Clone	h1b3	2.972	222.955	117.482	756.915	4.744
Ecad MO N-N	Non Clone- Non Clone	h1b3	2.972	229.181	124.28	682.867	4.744
Ecad MO N-N	Non Clone- Non Clone	h1b3	2.972	227.306	120.263	501.049	4.744
Ecad MO N-N	Non Clone- Non Clone	h1b3	2.972	262.966	141.677	640.547	4.744
Ecad MO N-N	Non Clone- Non Clone
Ecad MO N-N	Non Clone- Non Clone	h1b4	11.671	137.472	96.076	368.127	18.89
Ecad MO N-N	Non Clone- Non Clone	h1b4	11.671	148.413	98.925	486.034	18.89
Ecad MO N-N	Non Clone- Non Clone	h1b4	11.671	159.825	97.795	686.135	18.89
Ecad MO N-N	Non Clone- Non Clone	h1b4	11.671	165.327	99.718	619.135	18.89
Ecad MO N-N	Non Clone- Non Clone	h1b4	11.671	167.26	101.462	687.135	18.89
Ecad MO N-N	Non Clone- Non Clone	h1b4	11.671	173.68	100.886	757.875	18.89
Ecad MO N-N	Non Clone- Non Clone	h1b4	11.671	185.19	102.345	719.237	18.89
Ecad MO N-N	Non Clone- Non Clone	h1b4	11.671	189.015	102.64	676.973	18.89
Ecad MO N-N	Non Clone- Non Clone	h1b4	11.671	199.087	103.81	857.712	18.89
Ecad MO N-N	Non Clone- Non Clone
Ecad MO N-N	Non Clone- Non Clone	h1b5	11.563	211.15	108.804	528.491	18.714
Ecad MO N-N	Non Clone- Non Clone	h1b5	11.563	305.545	112.263	858.774	18.714
Ecad MO N-N	Non Clone- Non Clone	h1b5	11.563	349.536	118.826	1092.29	18.714
Ecad MO N-N	Non Clone- Non Clone	h1b5	11.563	333.9	116.478	1636.667	18.714
Ecad MO N-N	Non Clone- Non Clone	h1b5	11.563	303.296	114.946	1417.607	18.714
Ecad MO N-N	Non Clone- Non Clone	h1b5	11.563	267.024	106.906	1329.337	18.714
Ecad MO N-N	Non Clone- Non Clone	h1b5	11.942	388.143	114.17	1352.858	19.32
Ecad MO N-N	Non Clone- Non Clone	h1b5	11.942	416.175	115.454	1416.145	19.32
Ecad MO N-N	Non Clone- Non Clone	h1b5	11.942	405.297	140.21	1841.668	19.32
Ecad MO N-N	Non Clone- Non Clone	h1b5	11.942	373.31	139.75	1981.654	19.32
Ecad MO N-N	Non Clone- Non Clone	h1b5	11.942	338.347	133.797	2057.173	19.32
Ecad MO N-N	Non Clone- Non Clone	h1b5	11.942	293.112	124.045	1155.26	19.32
Ecad MO N-N	Non Clone- Non Clone
Ecad MO N-N	Non Clone- Non Clone	h1b6	10.807	290.004	102.61	1204.831	17.484
Ecad MO N-N	Non Clone- Non Clone	h1b6	10.807	337.557	102.591	1564.63	17.484
Ecad MO N-N	Non Clone- Non Clone	h1b6	10.807	337.285	109.694	1352.471	17.484
Ecad MO N-N	Non Clone- Non Clone	h1b6	10.807	307.542	109.443	1128.302	17.484
Ecad MO N-N	Non Clone- Non Clone	h1b6	10.807	265.454	110.004	877.539	17.484
Ecad MO N-N	Non Clone- Non Clone	h1b6	10.807	233.98	106.945	849.597	17.484
Ecad MO N-N	Non Clone- Non Clone	h1b6	10.807	354.449	129.826	1182.768	17.484
Ecad MO N-N	Non Clone- Non Clone	h1b6	10.807	333.93	130.462	1363.644	17.484
Ecad MO N-N	Non Clone- Non Clone	h1b6	10.807	322.718	122.578	1358.525	17.484
Ecad MO N-N	Non Clone- Non Clone	h1b6	10.807	314	136.312	1254.15	17.484
Ecad MO N-N	Non Clone- Non Clone
Ecad MO N-N	Non Clone- Non Clone	h1b7	12.482	177.271	96.386	446.819	20.201
Ecad MO N-N	Non Clone- Non Clone	h1b7	12.482	238.128	98.408	678.745	20.201
Ecad MO N-N	Non Clone- Non Clone	h1b7	12.482	266.222	101.067	795.652	20.201
Ecad MO N-N	Non Clone- Non Clone	h1b7	12.482	258.763	102.146	867.662	20.201
Ecad MO N-N	Non Clone- Non Clone	h1b7	12.482	255.669	106.657	690.792	20.201
Ecad MO N-N	Non Clone- Non Clone	h1b7	12.482	264.33	106.677	687.818	20.201
Ecad MO N-N	Non Clone- Non Clone	h1b7	12.482	305.093	121.907	898.261	20.201
Ecad MO N-N	Non Clone- Non Clone	h1b7	12.482	350.48	129.81	1235.294	20.201
Ecad MO N-N	Non Clone- Non Clone	h1b7	12.482	379.234	124.066	1064.182	20.201
Ecad MO N-N	Non Clone- Non Clone	h1b7	12.482	389.615	128.297	1249.918	20.201
Ecad MO N-N	Non Clone- Non Clone
Ecad MO N-N	Non Clone- Non Clone	h1b8	5.782	280.881	103.547	985.65	9.313
Ecad MO N-N	Non Clone- Non Clone	h1b8	5.782	308.973	117.683	1493.143	9.313
Ecad MO N-N	Non Clone- Non Clone	h1b8	5.782	312.931	119.785	1438.214	9.313
Ecad MO N-N	Non Clone- Non Clone	h1b8	5.782	322.097	126.376	1327.321	9.313
Ecad MO N-N	Non Clone- Non Clone	h1b8	5.782	350.128	136.165	1356.804	9.313
Ecad MO N-N	Non Clone- Non Clone	h1b8	5.782	446.318	163.756	1664.647	9.313
Ecad MO N-N	Non Clone- Non Clone	h1b8	5.782	497.724	137.843	2229.242	9.313
Ecad MO N-N	Non Clone- Non Clone
Ecad MO N-N	Non Clone- Non Clone	h1b9	11.563	319.709	93.998	2295.689	18.714
Ecad MO N-N	Non Clone- Non Clone	h1b9	11.563	327.693	97.275	1287.932	18.714
Ecad MO N-N	Non Clone- Non Clone	h1b9	11.563	299.434	100.832	819.673	18.714
Ecad MO N-N	Non Clone- Non Clone	h1b9	11.563	276.297	100.378	940.507	18.714
Ecad MO N-N	Non Clone- Non Clone	h1b9	11.077	310.176	119.822	1413.692	17.922
Ecad MO N-N	Non Clone- Non Clone	h1b9	11.077	297.507	117.766	1104.814	17.922
Ecad MO N-N	Non Clone- Non Clone	h1b9	11.077	290.166	113.899	1168.954	17.922
Ecad MO N-N	Non Clone- Non Clone	h1b9	11.077	293.578	104.108	1344.757	17.922
Ecad MO N-N	Non Clone- Non Clone	h1b9	11.077	304.696	113.006	1294.469	17.922
Ecad MO N-N	Non Clone- Non Clone	h1b9	11.077	316.172	121.367	1206.017	17.922
Ecad MO N-N	Non Clone- Non Clone	h1b9	11.077	328.181	115.249	1563.078	17.922
Ecad MO N-N	Non Clone- Non Clone	h1b9	11.077	334.268	118.172	1477.586	17.922
Ecad MO N-N	Non Clone- Non Clone
Ecad MO N-N	Non Clone- Non Clone	h1b10	13.887	262.591	96.805	876.485	22.492
Ecad MO N-N	Non Clone- Non Clone	h1b10	13.887	304.181	106.95	956.496	22.492
Ecad MO N-N	Non Clone- Non Clone	h1b10	13.887	318.982	119.275	1038.644	22.492
Ecad MO N-N	Non Clone- Non Clone	h1b10	13.887	315.102	109.667	905.347	22.492
Ecad MO N-N	Non Clone- Non Clone	h1b10	13.887	311.048	115.727	938.204	22.492
Ecad MO N-N	Non Clone- Non Clone	h1b10	13.887	317.87	106.973	1077.688	22.492
Ecad MO N-N	Non Clone- Non Clone	h1b10	13.887	309.313	118.086	1452.105	22.492
Ecad MO N-N	Non Clone- Non Clone	h1b10	14.103	374.645	123.565	1573.5	22.843
Ecad MO N-N	Non Clone- Non Clone	h1b10	14.103	384.314	135.929	1750.746	22.843
Ecad MO N-N	Non Clone- Non Clone	h1b10	14.103	387.068	134.544	1580.418	22.843
Ecad MO N-N	Non Clone- Non Clone	h1b10	14.103	379.014	141.524	1303.619	22.843
Ecad MO N-N	Non Clone- Non Clone	h1b10	14.103	370.477	127.807	1517.167	22.843
Ecad MO N-N	Non Clone- Non Clone
Ecad MO N-N	Non Clone- Non Clone	h1b11	14.913	229.588	101.131	812.258	24.161
Ecad MO N-N	Non Clone- Non Clone	h1b11	14.913	254.391	97.184	882.052	24.161
Ecad MO N-N	Non Clone- Non Clone	h1b11	14.913	262.774	106.564	1075.441	24.161
Ecad MO N-N	Non Clone- Non Clone	h1b11	14.913	263.417	101.621	1123.375	24.161
Ecad MO N-N	Non Clone- Non Clone	h1b11	13.995	290.576	114.154	1026.589	22.667
Ecad MO N-N	Non Clone- Non Clone	h1b11	13.995	305.064	117.163	1192.491	22.667
Ecad MO N-N	Non Clone- Non Clone	h1b11	13.995	332.699	123.071	1795.387	22.667
Ecad MO N-N	Non Clone- Non Clone	h1b11	13.995	368.927	129.531	2501.793	22.667
Ecad MO N-N	Non Clone- Non Clone	h1b11	13.995	397.499	135.496	2553.972	22.667
Ecad MO N-N	Non Clone- Non Clone	h1b11	13.995	414.856	126.819	1380.982	22.667
Ecad MO N-N	Non Clone- Non Clone	h1b11	13.995	431.965	145.069	1280.145	22.667
Ecad MO N-N	Non Clone- Non Clone	h1b11	13.995	431.095	141.739	1300.126	22.667
Ecad MO N-N	Non Clone- Non Clone
Ecad MO N-N	Non Clone- Non Clone	h1b12	10.645	250.84	102.934	974.015	17.22
Ecad MO N-N	Non Clone- Non Clone	h1b12	10.645	286.947	113.647	1134.063	17.22
Ecad MO N-N	Non Clone- Non Clone	h1b12	10.645	314.47	121.324	1406.961	17.22
Ecad MO N-N	Non Clone- Non Clone	h1b12	10.645	347.962	127.522	1419.75	17.22
Ecad MO N-N	Non Clone- Non Clone	h1b12	10.645	383.898	131.95	1064.492	17.22
Ecad MO N-N	Non Clone- Non Clone	h1b12	10.645	378.316	141.414	1223.905	17.22
Ecad MO N-N	Non Clone- Non Clone	h1b12	10.645	331.735	129.165	1085.439	17.22
Ecad MO N-N	Non Clone- Non Clone	h1b12	10.645	292.163	109.422	1102.142	17.22
Ecad MO N-N	Non Clone- Non Clone	h2b1	7.187	311.561	138.658	847.63	11.597
Ecad MO N-N	Non Clone- Non Clone	h2b1	7.187	397.313	166.858	1521.205	11.597
Ecad MO N-N	Non Clone- Non Clone	h2b1	7.187	551.696	222.357	2359.483	11.597
Ecad MO N-N	Non Clone- Non Clone	h2b1	7.187	656.283	219.051	1972.779	11.597
Ecad MO N-N	Non Clone- Non Clone	h2b1	7.187	566.096	221.634	1774.405	11.597
Ecad MO N-N	Non Clone- Non Clone
Ecad MO N-N	Non Clone- Non Clone	h2b2	5.511	380.546	135.621	1593.348	8.874
Ecad MO N-N	Non Clone- Non Clone	h2b2	5.511	535.823	191.286	2524.853	8.874
Ecad MO N-N	Non Clone- Non Clone	h2b2	5.511	756.203	261.349	2764.725	8.874
Ecad MO N-N	Non Clone- Non Clone	h2b2	5.511	853.608	257.76	2146.354	8.874
Ecad MO N-N	Non Clone- Non Clone	h2b2	5.511	722.873	235.259	1676.606	8.874
Ecad MO N-N	Non Clone- Non Clone
Ecad MO N-N	Non Clone- Non Clone	h2b3	6.214	337.663	144.868	1213.334	10.013
Ecad MO N-N	Non Clone- Non Clone	h2b3	6.214	445.95	153.8	2088.427	10.013
Ecad MO N-N	Non Clone- Non Clone	h2b3	6.214	597.623	156.821	1790.126	10.013
Ecad MO N-N	Non Clone- Non Clone	h2b3	6.214	596.155	166.499	1462.546	10.013
Ecad MO N-N	Non Clone- Non Clone	h2b3	6.214	437.941	190.588	1024.659	10.013
Ecad MO N-N	Non Clone- Non Clone
Ecad MO N-N	Non Clone- Non Clone	h2b4	5.998	319.641	126.723	917.447	9.664
Ecad MO N-N	Non Clone- Non Clone	h2b4	5.998	410.385	150.957	1210.491	9.664
Ecad MO N-N	Non Clone- Non Clone	h2b4	5.998	526.003	167.459	1656.697	9.664
Ecad MO N-N	Non Clone- Non Clone	h2b4	5.998	643.029	202.139	2099.933	9.664
Ecad MO N-N	Non Clone- Non Clone	h2b4	5.998	656.846	213.759	1973.254	9.664
Ecad MO N-N	Non Clone- Non Clone	h2b4	5.998	545.843	179.949	2052.732	9.664
Ecad MO N-N	Non Clone- Non Clone
Ecad MO N-N	Non Clone- Non Clone	h2b5	8.051	350.825	124.195	1311.896	13.003
Ecad MO N-N	Non Clone- Non Clone	h2b5	8.051	448.874	124.663	2143.416	13.003
Ecad MO N-N	Non Clone- Non Clone	h2b5	8.051	568.025	174.229	2166.595	13.003
Ecad MO N-N	Non Clone- Non Clone	h2b5	8.051	660.23	188.215	2274.514	13.003
Ecad MO N-N	Non Clone- Non Clone	h2b5	8.051	658.678	185.228	2740.663	13.003
Ecad MO N-N	Non Clone- Non Clone
Ecad MO N-N	Non Clone- Non Clone	h2b6	11.725	283.685	0	1104.079	18.977
Ecad MO N-N	Non Clone- Non Clone	h2b6	11.725	378.232	0	1871.921	18.977
Ecad MO N-N	Non Clone- Non Clone	h2b6	11.725	507.898	0	1438.561	18.977
Ecad MO N-N	Non Clone- Non Clone	h2b6	11.725	605.013	0	1813.082	18.977
Ecad MO N-N	Non Clone- Non Clone	h2b6	11.725	599.79	0	2271.899	18.977
Ecad MO N-N	Non Clone- Non Clone	h2b6	11.725	401.638	0	1248.942	18.977
Ecad MO N-N	Non Clone- Non Clone	h3b1	11.185	224.421	107.901	556.651	18.099
Ecad MO N-N	Non Clone- Non Clone	h3b1	11.185	272.67	107.872	898.77	18.099
Ecad MO N-N	Non Clone- Non Clone	h3b1	11.185	308.038	106.645	1347.063	18.099
Ecad MO N-N	Non Clone- Non Clone	h3b1	11.185	298.705	112.262	1611.74	18.099
Ecad MO N-N	Non Clone- Non Clone	h3b1	10.969	332.064	128.396	1565.375	17.747
Ecad MO N-N	Non Clone- Non Clone	h3b1	10.969	347.821	136.63	1440.623	17.747
Ecad MO N-N	Non Clone- Non Clone	h3b1	10.969	340.225	138.777	1999.61	17.747
Ecad MO N-N	Non Clone- Non Clone	h3b1	10.969	338.729	131.309	2636.293	17.747
Ecad MO N-N	Non Clone- Non Clone	h3b1	10.969	464.101	140.787	3311.909	17.747
Ecad MO N-N	Non Clone- Non Clone	h3b1	10.969	515.247	158.425	2237.597	17.747
Ecad MO N-N	Non Clone- Non Clone	h3b1	10.969	538.843	165.121	2253.541	17.747
Ecad MO N-N	Non Clone- Non Clone
Ecad MO N-N	Non Clone- Non Clone	h3b2	10.375	221.096	103.764	578.237	16.781
Ecad MO N-N	Non Clone- Non Clone	h3b2	10.375	278.852	102.166	889.277	16.781
Ecad MO N-N	Non Clone- Non Clone	h3b2	10.375	334.169	102.595	1413.051	16.781
Ecad MO N-N	Non Clone- Non Clone	h3b2	10.375	365.074	99.872	1607.758	16.781
Ecad MO N-N	Non Clone- Non Clone	h3b2	10.321	538.787	131.365	2134.393	16.693
Ecad MO N-N	Non Clone- Non Clone	h3b2	10.321	569.569	119.753	2570.202	16.693
Ecad MO N-N	Non Clone- Non Clone	h3b2	10.321	534.945	135.942	2328.638	16.693
Ecad MO N-N	Non Clone- Non Clone	h3b2	10.321	511.585	122.691	2148.141	16.693
Ecad MO N-N	Non Clone- Non Clone	h3b2	10.321	470.089	130.322	1768.143	16.693
Ecad MO N-N	Non Clone- Non Clone	h3b2	10.321	443.284	118.047	3142.108	16.693
Ecad MO N-N	Non Clone- Non Clone	h3b2	10.321	434.827	117.072	3802.612	16.693
Ecad MO N-N	Non Clone- Non Clone	h3b2	10.321	426.252	117.31	2851.448	16.693
Ecad MO N-N	Non Clone- Non Clone
Ecad MO N-N	Non Clone- Non Clone	h3b3	12.158	269.452	110.695	593.532	19.68
Ecad MO N-N	Non Clone- Non Clone	h3b3	12.158	339.259	119.28	798.879	19.68
Ecad MO N-N	Non Clone- Non Clone	h3b3	12.158	383.276	121.294	1210.955	19.68
Ecad MO N-N	Non Clone- Non Clone	h3b3	12.32	278.421	114.393	1365.383	19.944
Ecad MO N-N	Non Clone- Non Clone	h3b3	12.32	355.913	124.034	1356.108	19.944
Ecad MO N-N	Non Clone- Non Clone	h3b3	12.32	412.476	129.075	1779.501	19.944
Ecad MO N-N	Non Clone- Non Clone	h3b3	12.32	454.656	117.09	1563.605	19.944
Ecad MO N-N	Non Clone- Non Clone	h3b3	12.32	495.953	139.133	2067.502	19.944
Ecad MO N-N	Non Clone- Non Clone	h3b3	12.32	537.455	155.872	1826.675	19.944
Ecad MO N-N	Non Clone- Non Clone	h3b3	12.32	546.695	154.228	1728.058	19.944
Ecad MO N-N	Non Clone- Non Clone
Ecad MO N-N	Non Clone- Non Clone	h3b4	9.402	227.278	112.092	627.298	15.2
Ecad MO N-N	Non Clone- Non Clone	h3b4	9.402	291.553	127.717	799.894	15.2
Ecad MO N-N	Non Clone- Non Clone	h3b4	9.402	356.563	123.171	1121.832	15.2
Ecad MO N-N	Non Clone- Non Clone	h3b4	9.402	397.42	132.109	1436.339	15.2
Ecad MO N-N	Non Clone- Non Clone	h3b4	9.402	414.508	153.249	1143.988	15.2
Ecad MO N-N	Non Clone- Non Clone	h3b4	9.402	417.474	146.774	1298.947	15.2
Ecad MO N-N	Non Clone- Non Clone	h3b4	9.402	422.837	118.559	1363.034	15.2
Ecad MO N-N	Non Clone- Non Clone	h3b4	9.402	417.53	142.765	1452.796	15.2
Ecad MO N-N	Non Clone- Non Clone	h3b4	9.402	404.362	107.777	1106.555	15.2
Ecad MO N-N	Non Clone- Non Clone	h3b4	9.402	383.684	139.496	1653.711	15.2
Ecad MO N-N	Non Clone- Non Clone
Ecad MO N-N	Non Clone- Non Clone	h3b5	7.349	229.776	121.418	466.576	11.861
Ecad MO N-N	Non Clone- Non Clone	h3b5	7.349	286.039	119.597	629.159	11.861
Ecad MO N-N	Non Clone- Non Clone	h3b5	7.349	334.565	123.973	748.697	11.861
Ecad MO N-N	Non Clone- Non Clone	h3b5	7.349	355.149	138.07	797.618	11.861
Ecad MO N-N	Non Clone- Non Clone	h3b5	7.349	378.397	143.078	981.877	11.861
Ecad MO N-N	Non Clone- Non Clone	h3b5	7.349	385.489	159.207	987.748	11.861
Ecad MO N-N	Non Clone- Non Clone	h3b5	7.349	382.474	175.636	988.694	11.861
Ecad MO N-N	Non Clone- Non Clone	h3b5	7.349	385.713	154.367	941.022	11.861
Ecad MO N-N	Non Clone- Non Clone	h3b5	7.349	393.984	137.242	859.565	11.861
Ecad MO N-N	Non Clone- Non Clone	h3b5	7.349	404.611	143.77	837.72	11.861
Ecad MO N-N	Non Clone- Non Clone	h3b5	7.349	405.009	154.964	995.444	11.861
Ecad MO N-N	Non Clone- Non Clone	h3b5	7.349	402.858	158.093	978.272	11.861
Ecad MO N-N	Non Clone- Non Clone	h3b5	7.349	404.749	166.453	1061.328	11.861
Ecad MO N-N	Non Clone- Non Clone	h3b5	7.349	419.326	158.173	1432.323	11.861
Ecad MO N-N	Non Clone- Non Clone	h4b11	9.942	206.936	97.123	613.332	16.078
Ecad MO N-N	Non Clone- Non Clone	h4b11	9.942	230.906	103.922	785.101	16.078
Ecad MO N-N	Non Clone- Non Clone	h4b11	9.942	248.115	104.052	1068.709	16.078
Ecad MO N-N	Non Clone- Non Clone	h4b11	9.942	252.755	103.97	1071.894	16.078
Ecad MO N-N	Non Clone- Non Clone	h4b11	9.942	247.356	101.618	957.563	16.078
Ecad MO N-N	Non Clone- Non Clone	h4b11	9.942	245.421	102.991	983.01	16.078
Ecad MO N-N	Non Clone- Non Clone	h4b11	9.942	244.807	105.927	868.901	16.078
Ecad MO N-N	Non Clone- Non Clone
Ecad MO N-N	Non Clone- Non Clone	h4b12	6.808	221.475	105.204	631.101	10.982
Ecad MO N-N	Non Clone- Non Clone	h4b12	6.808	249.699	109.637	832.916	10.982
Ecad MO N-N	Non Clone- Non Clone	h4b12	6.808	255.859	104.679	976.468	10.982
Ecad MO N-N	Non Clone- Non Clone	h4b12	6.808	260.783	102.924	1023.194	10.982
Ecad MO N-N	Non Clone- Non Clone	h4b12	6.808	264.613	108.716	1021.877	10.982
Ecad MO N-N	Non Clone- Non Clone	h4b12	6.808	287.832	120.922	868.239	10.982
Ecad MO N-N	Non Clone- Non Clone	h4b12	6.808	316.032	118.643	832.001	10.982
Ecad MO N-N	Non Clone- Non Clone	h4b12	5.836	479.831	129.003	1875.206	9.401
Ecad MO N-N	Non Clone- Non Clone	h4b12	5.836	427.506	125.056	1135.829	9.401
Ecad MO N-N	Non Clone- Non Clone
Ecad MO N-N	Non Clone- Non Clone	h4b13	13.4	222.478	89.735	754.132	21.701
Ecad MO N-N	Non Clone- Non Clone	h4b13	13.4	252.29	100.608	1134.801	21.701
Ecad MO N-N	Non Clone- Non Clone	h4b13	13.4	269.705	102.089	1678.603	21.701
Ecad MO N-N	Non Clone- Non Clone	h4b13	13.4	270.201	104.204	1398.664	21.701
Ecad MO N-N	Non Clone- Non Clone	h4b13	13.4	270.433	105.761	948.976	21.701
Ecad MO N-N	Non Clone- Non Clone	h4b13	13.4	266.344	109.687	1037.779	21.701
Ecad MO N-N	Non Clone- Non Clone	h4b13	13.4	263.755	112.622	1079.588	21.701
Ecad MO N-N	Non Clone- Non Clone	h4b13	13.4	260.147	102.442	1318.739	21.701
Ecad MO N-N	Non Clone- Non Clone	h4b13	13.4	251.981	101.281	983.974	21.701
