# Supplementary material for: Stepwise polarisation of developing bilayered epidermis is mediated by aPKC and E-cadherin in zebrafish
Source: eLife. 2020 Jan 22;9:e49064. doi: 10.7554/eLife.49064 (PMC6975926; doi:10.7554/eLife.49064)
Supplement: Figure 4—figure supplement 2—source data 2. [file elife-49064-fig4-figsupp2-data2.csv]

Genotype	Boundary	Cell name	Area	Mean	Min	Max	Length
Ctrl MO CO	Complete Overlap	h1b1	10.266	610.013	194.834	2404.204	16.605
Ctrl MO CO	Complete Overlap	h1b1	10.266	609.151	181.115	2904.443	16.605
Ctrl MO CO	Complete Overlap	h1b1	10.266	531.413	156.282	2213.909	16.605
Ctrl MO CO	Complete Overlap	h1b1	10.266	425.23	181.127	1770.431	16.605
Ctrl MO CO	Complete Overlap	h1b1	10.266	321.832	140.821	818.907	16.605
Ctrl MO CO	Complete Overlap	h1b1	10.266	281.214	120.618	788.849	16.605
Ctrl MO CO	Complete Overlap	h1b1	10.266	250.798	108.886	756.244	16.605
Ctrl MO CO	Complete Overlap	h1b1	10.266	221.164	103.232	606.317	16.605
Ctrl MO CO	Complete Overlap
Ctrl MO CO	Complete Overlap	h1b2	10.321	640.511	173.446	3958.276	16.693
Ctrl MO CO	Complete Overlap	h1b2	10.321	577.521	169.392	2475.474	16.693
Ctrl MO CO	Complete Overlap	h1b2	10.321	458.239	172.514	1567.802	16.693
Ctrl MO CO	Complete Overlap	h1b2	10.321	370.587	169.327	2954.591	16.693
Ctrl MO CO	Complete Overlap	h1b2	10.321	324.755	146.544	2881.506	16.693
Ctrl MO CO	Complete Overlap	h1b2	10.321	265.036	133.299	1364.954	16.693
Ctrl MO CO	Complete Overlap	h1b2	10.321	220.333	109.56	673.046	16.693
Ctrl MO CO	Complete Overlap
Ctrl MO CO	Complete Overlap	h1b3	10.699	474.351	139.917	3477.593	17.308
Ctrl MO CO	Complete Overlap	h1b3	10.699	423.245	125.854	2686.37	17.308
Ctrl MO CO	Complete Overlap	h1b3	10.699	344.908	138.838	2173.562	17.308
Ctrl MO CO	Complete Overlap	h1b3	10.699	270.579	121.027	878.623	17.308
Ctrl MO CO	Complete Overlap	h1b3	10.699	206.563	109.386	515.476	17.308
Ctrl MO CO	Complete Overlap
Ctrl MO CO	Complete Overlap	h1b4	9.456	634.517	152.656	3465.793	15.287
Ctrl MO CO	Complete Overlap	h1b4	9.456	616.765	186.189	1914.882	15.287
Ctrl MO CO	Complete Overlap	h1b4	9.456	529.921	197.38	1644.897	15.287
Ctrl MO CO	Complete Overlap	h1b4	9.456	432.722	149.066	1284.853	15.287
Ctrl MO CO	Complete Overlap	h1b4	9.456	336.712	166.011	1068.96	15.287
Ctrl MO CO	Complete Overlap	h1b4	9.456	293.357	136.014	1017.649	15.287
Ctrl MO CO	Complete Overlap	h1b4	9.456	267.043	127.635	666.52	15.287
Ctrl MO CO	Complete Overlap
Ctrl MO CO	Complete Overlap	h1b5	4.971	520.545	198.701	2063.868	7.995
Ctrl MO CO	Complete Overlap	h1b5	4.971	585.293	217.364	2130.317	7.995
Ctrl MO CO	Complete Overlap	h1b5	4.971	586.388	194.419	1415.176	7.995
Ctrl MO CO	Complete Overlap	h1b5	4.971	514.837	225.374	1099.854	7.995
Ctrl MO CO	Complete Overlap	h1b5	4.971	380.691	179.348	868.712	7.995
Ctrl MO CO	Complete Overlap	h1b5	4.971	309.475	168.947	597.934	7.995
Ctrl MO CO	Complete Overlap	h1b5	4.971	263.505	128.99	567.19	7.995
Ctrl MO CO	Complete Overlap
Ctrl MO CO	Complete Overlap	h1b6	12.914	658.686	159.388	4095	20.91
Ctrl MO CO	Complete Overlap	h1b6	12.914	601.458	180.887	2724.126	20.91
Ctrl MO CO	Complete Overlap	h1b6	12.914	482.942	150.6	3727.746	20.91
Ctrl MO CO	Complete Overlap	h1b6	12.914	365.641	132.085	3007.227	20.91
Ctrl MO CO	Complete Overlap	h1b6	12.914	281.416	120.557	1133.72	20.91
Ctrl MO CO	Complete Overlap	h1b6	12.914	217.457	114.083	1343.133	20.91
Ctrl MO CO	Complete Overlap	h2b1	9.78	513.204	166.922	3147.989	15.815
Ctrl MO CO	Complete Overlap	h2b1	9.78	449.635	172.354	2518.712	15.815
Ctrl MO CO	Complete Overlap	h2b1	9.78	357.942	174.487	1244.926	15.815
Ctrl MO CO	Complete Overlap	h2b1	9.78	313.632	148.761	1054.575	15.815
Ctrl MO CO	Complete Overlap
Ctrl MO CO	Complete Overlap	h2b2	6.808	741.156	200.416	4026.151	10.982
Ctrl MO CO	Complete Overlap	h2b2	6.808	703.252	243.738	1948.321	10.982
Ctrl MO CO	Complete Overlap	h2b2	6.808	604.607	196.268	1283.3	10.982
Ctrl MO CO	Complete Overlap	h2b2	6.808	478.972	181.887	1435.018	10.982
Ctrl MO CO	Complete Overlap	h2b2	6.808	416.526	171.045	1711.246	10.982
Ctrl MO CO	Complete Overlap	h2b2	6.808	336.477	149.613	1381.337	10.982
Ctrl MO CO	Complete Overlap
Ctrl MO CO	Complete Overlap	h2b3	7.565	678.985	213.779	3988.323	12.212
Ctrl MO CO	Complete Overlap	h2b3	7.565	668.028	194.071	3676.064	12.212
Ctrl MO CO	Complete Overlap	h2b3	7.565	563.809	199.854	1718.563	12.212
Ctrl MO CO	Complete Overlap	h2b3	7.565	481.404	192.87	1101.768	12.212
Ctrl MO CO	Complete Overlap	h2b3	7.565	392.894	171.236	1265.656	12.212
Ctrl MO CO	Complete Overlap
Ctrl MO CO	Complete Overlap	h2b4	9.348	734.858	176.058	2956.086	15.112
Ctrl MO CO	Complete Overlap	h2b4	9.348	675.581	210.321	2663.253	15.112
Ctrl MO CO	Complete Overlap	h2b4	9.348	547.502	183.182	1974.594	15.112
Ctrl MO CO	Complete Overlap	h2b4	9.348	457.572	160.774	1118.028	15.112
Ctrl MO CO	Complete Overlap	h2b4	9.348	379.034	174.363	950.614	15.112
Ctrl MO CO	Complete Overlap
Ctrl MO CO	Complete Overlap	h2b5	12.428	534.901	148.976	3323.281	20.117
Ctrl MO CO	Complete Overlap	h2b5	12.428	577.263	147.443	2066.607	20.117
Ctrl MO CO	Complete Overlap	h2b5	12.428	540.733	160.49	1406.101	20.117
Ctrl MO CO	Complete Overlap	h2b5	12.428	476.32	155.293	1164.713	20.117
Ctrl MO CO	Complete Overlap	h2b5	12.428	400.813	153.927	1091.551	20.117
Ctrl MO CO	Complete Overlap	h2b5	12.428	335.868	136.239	1564.101	20.117
Ctrl MO CO	Complete Overlap
Ctrl MO CO	Complete Overlap	h2b6	7.511	533.728	147.489	3178.502	12.125
Ctrl MO CO	Complete Overlap	h2b6	7.511	528.53	176.12	2004.197	12.125
Ctrl MO CO	Complete Overlap	h2b6	7.511	460.755	156.954	1493.101	12.125
Ctrl MO CO	Complete Overlap	h2b6	7.511	401.76	164.45	982.576	12.125
Ctrl MO CO	Complete Overlap	h2b6	7.511	353.053	136.253	1157.855	12.125
Ctrl MO CO	Complete Overlap	h2b6	7.511	316.393	142.83	1256.176	12.125
Ctrl MO CO	Complete Overlap	h3b1	8.97	402.02	119.321	2064.746	14.497
Ctrl MO CO	Complete Overlap	h3b1	8.97	342.705	123.77	1351.992	14.497
Ctrl MO CO	Complete Overlap	h3b1	9.942	455.897	155.338	1384.382	16.078
Ctrl MO CO	Complete Overlap	h3b1	9.942	443.27	165.647	2502.633	16.078
Ctrl MO CO	Complete Overlap	h3b1	9.942	406.331	153.884	2296.268	16.078
Ctrl MO CO	Complete Overlap	h3b1	9.942	346.984	127.26	1298.992	16.078
Ctrl MO CO	Complete Overlap	h3b1	12.212	344.461	110.804	1583.253	19.768
Ctrl MO CO	Complete Overlap	h3b1	12.212	296.775	110.149	1243.203	19.768
Ctrl MO CO	Complete Overlap	h3b1	12.212	258.463	110.75	764.368	19.768
Ctrl MO CO	Complete Overlap	h3b1	12.212	227.577	111.533	817.513	19.768
Ctrl MO CO	Complete Overlap
Ctrl MO CO	Complete Overlap	h3b2	15.13	392.556	152.494	1997.552	24.512
Ctrl MO CO	Complete Overlap	h3b2	15.13	326.168	136.473	1540.407	24.512
Ctrl MO CO	Complete Overlap	h3b2	15.13	278.562	110.327	1076.729	24.512
Ctrl MO CO	Complete Overlap	h3b2	15.13	249.703	109.953	1843.955	24.512
Ctrl MO CO	Complete Overlap	h3b2	15.13	222.516	104.155	1406.991	24.512
Ctrl MO CO	Complete Overlap	h3b2	15.13	196.422	104.723	821.447	24.512
Ctrl MO CO	Complete Overlap	h3b2	15.13	179.199	99.093	638.806	24.512
Ctrl MO CO	Complete Overlap
Ctrl MO CO	Complete Overlap	h3b3	5.89	322.208	129.252	1043.809	9.489
Ctrl MO CO	Complete Overlap	h3b3	5.89	279.515	128.118	1316.568	9.489
Ctrl MO CO	Complete Overlap	h3b3	5.89	252.47	115.303	1157.655	9.489
Ctrl MO CO	Complete Overlap	h3b3	5.89	224.686	112.038	678.317	9.489
Ctrl MO CO	Complete Overlap
Ctrl MO CO	Complete Overlap	h3b4	6.754	291.747	125.253	958.953	10.894
Ctrl MO CO	Complete Overlap	h3b4	6.754	260.186	109.618	648.772	10.894
Ctrl MO CO	Complete Overlap	h3b4	6.754	245.536	100.781	931.557	10.894
Ctrl MO CO	Complete Overlap	h3b4	6.754	234.815	101.485	849.302	10.894
Ctrl MO CO	Complete Overlap	h3b4	6.754	221.574	99.87	1609.093	10.894
Ctrl MO CO	Complete Overlap	h3b4	6.754	205.272	100.153	1668.282	10.894
Ctrl MO CO	Complete Overlap	h4b1	12.698	364.671	119.925	1707.011	20.559
Ctrl MO CO	Complete Overlap	h4b1	12.698	424.426	133.201	2104.244	20.559
Ctrl MO CO	Complete Overlap	h4b1	12.698	438.661	123.628	2206.34	20.559
Ctrl MO CO	Complete Overlap	h4b1	12.698	405.288	129.639	1643.298	20.559
Ctrl MO CO	Complete Overlap	h4b1	12.698	337.643	114.355	2161.891	20.559
Ctrl MO CO	Complete Overlap	h4b1	12.698	254.069	114.14	1071.606	20.559
Ctrl MO CO	Complete Overlap	h4b1	12.698	207.593	111.569	812.532	20.559
Ctrl MO CO	Complete Overlap
Ctrl MO CO	Complete Overlap	h4b2	6.16	429.128	167.972	1839.618	9.928
Ctrl MO CO	Complete Overlap	h4b2	6.16	407.16	162.808	1824.642	9.928
Ctrl MO CO	Complete Overlap	h4b2	6.16	367.037	129.666	1255.401	9.928
Ctrl MO CO	Complete Overlap	h4b2	6.16	310.827	125.756	1183.912	9.928
Ctrl MO CO	Complete Overlap	h4b2	6.16	237.133	122.446	917.096	9.928
Ctrl MO CO	Complete Overlap	h4b2	6.16	194.335	119.579	539.784	9.928
Ctrl MO CO	Complete Overlap	h4b2	6.16	157.04	103.464	349.951	9.928
Ctrl MO CO	Complete Overlap	h4b2	6.16	136.232	102.699	221.703	9.928
Ctrl MO CO	Complete Overlap
Ctrl MO CO	Complete Overlap	h4b3	8.591	403.712	149.326	973.783	13.882
Ctrl MO CO	Complete Overlap	h4b3	8.591	366.256	143.972	825.81	13.882
Ctrl MO CO	Complete Overlap	h4b3	8.591	322.655	149.464	701.527	13.882
Ctrl MO CO	Complete Overlap	h4b3	8.591	268.706	133.537	711.144	13.882
Ctrl MO CO	Complete Overlap	h4b3	8.591	238.572	124.682	755.106	13.882
Ctrl MO CO	Complete Overlap	h4b3	8.591	206.217	113.417	510.056	13.882
Ctrl MO CO	Complete Overlap	h5b1	7.078	513.751	150.996	2936.968	11.422
Ctrl MO CO	Complete Overlap	h5b1	7.078	545.192	156.453	2658.151	11.422
Ctrl MO CO	Complete Overlap	h5b1	7.078	547.755	190.998	1728.178	11.422
Ctrl MO CO	Complete Overlap	h5b1	7.078	529.021	177.677	1029.673	11.422
Ctrl MO CO	Complete Overlap	h5b1	7.078	512.451	158.841	1130.917	11.422
Ctrl MO CO	Complete Overlap	h5b1	7.078	489.104	157.269	1769.725	11.422
Ctrl MO CO	Complete Overlap	h5b1	7.078	461.17	160.658	1566.813	11.422
Ctrl MO CO	Complete Overlap	h5b1	7.078	414.086	120.787	1773.66	11.422
Ctrl MO CO	Complete Overlap	h5b1	7.078	345.471	145.41	1872.198	11.422
Ctrl MO CO	Complete Overlap	h5b1	7.078	271.944	126.864	1216.07	11.422
Ctrl MO CO	Complete Overlap	h5b1	7.078	226.399	111.666	515.212	11.422
Ctrl MO CO	Complete Overlap	h5b1	7.078	199.797	109.065	387.419	11.422
Ctrl MO CO	Complete Overlap
Ctrl MO CO	Complete Overlap	h5b2	7.997	423.899	124.037	1338.086	12.908
Ctrl MO CO	Complete Overlap	h5b2	7.997	422.556	135.54	1635.852	12.908
Ctrl MO CO	Complete Overlap	h5b2	7.997	420.029	118.184	1389.793	12.908
Ctrl MO CO	Complete Overlap	h5b2	7.997	406.156	122.893	1231.409	12.908
Ctrl MO CO	Complete Overlap	h5b2	7.997	378.578	117.77	1992.032	12.908
Ctrl MO CO	Complete Overlap	h5b2	7.997	338.927	106.353	2154.644	12.908
Ctrl MO CO	Complete Overlap	h5b2	7.997	279.564	118.135	1302.742	12.908
Ctrl MO CO	Complete Overlap	h5b2	7.997	230.082	113.172	621.003	12.908
Ctrl MO CO	Complete Overlap	h5b2	7.997	185.603	109.044	351.645	12.908
Ctrl MO CO	Complete Overlap
Ctrl MO CO	Complete Overlap	h5b3	3.674	628.37	247.384	1650.178	5.887
Ctrl MO CO	Complete Overlap	h5b3	3.674	562.351	239.201	1408.321	5.887
Ctrl MO CO	Complete Overlap	h5b3	3.674	477.979	192.243	1388.907	5.887
Ctrl MO CO	Complete Overlap	h5b3	3.674	376.95	170.215	706.823	5.887
Ctrl MO CO	Complete Overlap	h5b3	3.674	273.514	131.334	574.286	5.887
Ctrl MO CO	Complete Overlap	h5b3	3.674	207.956	119.504	406.244	5.887
Ctrl MO CO	Complete Overlap
Ctrl MO CO	Complete Overlap	h5b4	13.4	470.521	147.408	1832.12	21.701
Ctrl MO CO	Complete Overlap	h5b4	13.4	479.886	160.897	2036.183	21.701
Ctrl MO CO	Complete Overlap	h5b4	13.4	466.926	159.53	2376.822	21.701
Ctrl MO CO	Complete Overlap	h5b4	13.4	441.779	125.344	1746.727	21.701
Ctrl MO CO	Complete Overlap	h5b4	13.4	401.011	151.309	1121.308	21.701
Ctrl MO CO	Complete Overlap	h5b4	13.4	338.189	116.498	1790.683	21.701
Ctrl MO CO	Complete Overlap	h5b4	13.4	272.97	116.21	1183.657	21.701
Ctrl MO CO	Complete Overlap	h5b4	13.4	227.513	98.739	643.124	21.701
Ctrl MO CO	Complete Overlap	h5b4	13.4	198.616	109.605	503.439	21.701
Ctrl MO CO	Complete Overlap
Ctrl MO CO	Complete Overlap	h5b5	5.133	448.805	132.203	2353.418	8.259
Ctrl MO CO	Complete Overlap	h5b5	5.133	488.26	145.96	3028.222	8.259
Ctrl MO CO	Complete Overlap	h5b5	5.133	500.633	196.217	2405.145	8.259
Ctrl MO CO	Complete Overlap	h5b5	5.133	450.164	172.144	1258.32	8.259
Ctrl MO CO	Complete Overlap	h5b5	5.133	385.453	180.378	772.002	8.259
Ctrl MO CO	Complete Overlap	h5b5	5.133	318.755	135.986	576.703	8.259
Ctrl MO CO	Complete Overlap	h5b5	5.133	252.999	155.01	428.353	8.259
Ctrl MO CO	Complete Overlap	h5b5	5.133	203.146	134.023	338	8.259
Ctrl MO CO	Complete Overlap
Ctrl MO CO	Complete Overlap	h5b6	7.781	444.804	140.109	1377.22	12.564
Ctrl MO CO	Complete Overlap	h5b6	7.781	410.436	125.104	1937.346	12.564
Ctrl MO CO	Complete Overlap	h5b6	7.781	361.6	134.258	1585.329	12.564
Ctrl MO CO	Complete Overlap	h5b6	7.781	302.651	130.647	955.202	12.564
Ctrl MO CO	Complete Overlap	h5b6	7.781	234.667	112.084	660.274	12.564
Ctrl MO CO	Complete Overlap	h5b6	7.781	179.68	94.052	404.984	12.564
Ctrl MO CO	Complete Overlap	h5b6	7.781	154.017	102.579	354.849	12.564
Ctrl MO CO	Complete Overlap
Ctrl MO CO	Complete Overlap	h5b7	9.402	477.089	165.635	1570.259	15.2
Ctrl MO CO	Complete Overlap	h5b7	9.402	497.368	144.46	1894.544	15.2
Ctrl MO CO	Complete Overlap	h5b7	9.402	487.024	151.159	1613.632	15.2
Ctrl MO CO	Complete Overlap	h5b7	9.402	464.976	144.553	1330.617	15.2
Ctrl MO CO	Complete Overlap	h5b7	9.402	433.997	146.9	1216.27	15.2
Ctrl MO CO	Complete Overlap	h5b7	9.402	406.649	132.093	1475.826	15.2
Ctrl MO CO	Complete Overlap	h5b7	9.402	360.109	127.074	1461.861	15.2
Ctrl MO CO	Complete Overlap	h5b7	9.402	312.892	126.341	919.168	15.2
Ctrl MO CO	Complete Overlap	h5b7	9.402	281.681	123.861	908.246	15.2
Ctrl MO CO	Complete Overlap	h5b7	9.402	237.778	110.584	900.536	15.2
Ctrl MO CO	Complete Overlap
Ctrl MO CO	Complete Overlap	h5b8	8.645	500.264	176.912	1871.964	13.97
Ctrl MO CO	Complete Overlap	h5b8	8.645	466.07	147.843	2471.811	13.97
Ctrl MO CO	Complete Overlap	h5b8	8.645	436.487	143.622	2293.792	13.97
Ctrl MO CO	Complete Overlap	h5b8	8.645	394.228	131.076	1450.192	13.97
Ctrl MO CO	Complete Overlap	h5b8	8.645	358.271	114.677	1512.891	13.97
Ctrl MO CO	Complete Overlap	h5b8	8.645	313.764	107.394	1732.726	13.97
Ctrl MO CO	Complete Overlap	h5b8	8.645	258.293	103.106	1502.508	13.97
Ctrl MO CO	Complete Overlap	h5b8	8.645	225.932	101.712	1204.054	13.97
Ctrl MO CO	Complete Overlap
Ctrl MO CO	Complete Overlap	h5b9	7.078	618.035	123.304	3429.212	11.422
Ctrl MO CO	Complete Overlap	h5b9	7.078	601.579	148.272	3175.917	11.422
Ctrl MO CO	Complete Overlap	h5b9	7.078	577.944	169.281	2538.973	11.422
Ctrl MO CO	Complete Overlap	h5b9	7.078	499.088	154.232	1584.381	11.422
Ctrl MO CO	Complete Overlap	h5b9	7.078	411.222	171.066	1343.525	11.422
Ctrl MO CO	Complete Overlap	h5b9	7.078	328.654	130.802	1123.874	11.422
Ctrl MO CO	Complete Overlap	h5b9	7.078	287.433	114.654	1090.253	11.422
Ctrl MO CO	Complete Overlap	h5b9	7.078	250.441	108.299	1403.145	11.422
Ctrl MO CO	Complete Overlap
Ctrl MO CO	Complete Overlap	h5b10	7.943	479.892	135.735	1802.404	12.827
Ctrl MO CO	Complete Overlap	h5b10	7.943	482.572	156.247	1258.661	12.827
Ctrl MO CO	Complete Overlap	h5b10	7.943	436.022	163.676	1559.249	12.827
Ctrl MO CO	Complete Overlap	h5b10	7.943	374.625	157.385	1182.975	12.827
Ctrl MO CO	Complete Overlap	h5b10	7.943	320.498	140.225	1053.778	12.827
Ctrl MO CO	Complete Overlap	h5b10	7.943	277.819	120.258	943.731	12.827
Ctrl MO CO	Complete Overlap	h5b10	7.943	248.09	118.528	759.883	12.827
Ctrl MO CO	Complete Overlap
Ctrl MO CO	Complete Overlap	h5b11	7.403	544.325	139.631	1985.525	11.949
Ctrl MO CO	Complete Overlap	h5b11	7.403	484.943	115.535	1641.497	11.949
Ctrl MO CO	Complete Overlap	h5b11	7.403	431.924	130.09	1095.58	11.949
Ctrl MO CO	Complete Overlap	h5b11	7.403	363.444	120.894	906.16	11.949
Ctrl MO CO	Complete Overlap	h5b11	7.403	318.35	129.986	766.982	11.949
Ctrl MO CO	Complete Overlap	h5b11	7.403	283.341	133.414	632.339	11.949
Ctrl MO CO	Complete Overlap	h5b11	7.403	260.791	115.052	691.877	11.949
Ctrl MO CO	Complete Overlap	h5b11	7.403	243.412	124.309	614.785	11.949
Ctrl MO PO	Partial Overlap	h1b1	12.86	552.456	123.247	1691.908	20.823
Ctrl MO PO	Partial Overlap	h1b1	12.86	536.836	142.559	1721.178	20.823
Ctrl MO PO	Partial Overlap	h1b1	12.86	478.954	158.53	1700.218	20.823
Ctrl MO PO	Partial Overlap	h1b1	12.86	393.703	153.052	1828.959	20.823
Ctrl MO PO	Partial Overlap	h1b1	12.86	308.66	133.007	1358.571	20.823
Ctrl MO PO	Partial Overlap	h1b1	12.86	279.847	130.351	924.44	20.823
Ctrl MO PO	Partial Overlap
Ctrl MO PO	Partial Overlap	h1b2	13.509	560.248	110.814	3420.965	21.877
Ctrl MO PO	Partial Overlap	h1b2	13.509	596.378	111.556	3173.124	21.877
Ctrl MO PO	Partial Overlap	h1b2	13.509	571.244	124.053	2295.369	21.877
Ctrl MO PO	Partial Overlap	h1b2	13.509	529.644	119.119	2117.507	21.877
Ctrl MO PO	Partial Overlap	h1b2	13.509	472.134	122.254	2029.711	21.877
Ctrl MO PO	Partial Overlap	h1b2	13.509	401.367	119.378	1454.821	21.877
Ctrl MO PO	Partial Overlap	h1b2	13.509	333.109	131.326	2212.216	21.877
Ctrl MO PO	Partial Overlap	h1b2	13.509	293.261	121.647	1837.323	21.877
Ctrl MO PO	Partial Overlap
Ctrl MO PO	Partial Overlap	h1b3	11.779	576.1	142.011	2201.042	19.065
Ctrl MO PO	Partial Overlap	h1b3	11.779	651.903	151.762	2517.879	19.065
Ctrl MO PO	Partial Overlap	h1b3	11.779	630.306	197.362	2788.239	19.065
Ctrl MO PO	Partial Overlap	h1b3	11.779	491.93	170.356	1355.936	19.065
Ctrl MO PO	Partial Overlap	h1b3	11.779	400.136	161.086	960.116	19.065
Ctrl MO PO	Partial Overlap	h1b3	11.779	352.305	155.105	915.738	19.065
Ctrl MO PO	Partial Overlap	h1b3	11.779	315.656	134.294	1141.174	19.065
Ctrl MO PO	Partial Overlap
Ctrl MO PO	Partial Overlap	h1b4	8.754	465.821	152.17	1495.967	14.145
Ctrl MO PO	Partial Overlap	h1b4	8.754	528.229	157.455	1439.96	14.145
Ctrl MO PO	Partial Overlap	h1b4	8.754	515.767	201.062	1463.411	14.145
Ctrl MO PO	Partial Overlap	h1b4	8.754	460.974	155.752	1152.081	14.145
Ctrl MO PO	Partial Overlap	h1b4	8.754	378.346	185.49	1004.778	14.145
Ctrl MO PO	Partial Overlap	h1b4	8.754	306.884	153.282	990.288	14.145
Ctrl MO PO	Partial Overlap	h2b1	6.7	510.44	158.261	4095	10.807
Ctrl MO PO	Partial Overlap	h2b1	6.7	527.237	144.334	4095	10.807
Ctrl MO PO	Partial Overlap	h2b1	6.7	509.091	134.572	3456.948	10.807
Ctrl MO PO	Partial Overlap	h2b1	6.7	440.926	145.31	1451.684	10.807
Ctrl MO PO	Partial Overlap
Ctrl MO PO	Partial Overlap	h2b2	7.727	553.879	167.007	2446.157	12.465
Ctrl MO PO	Partial Overlap	h2b2	7.727	584.508	161.038	2292.112	12.465
Ctrl MO PO	Partial Overlap	h2b2	7.727	570.097	179.681	1584.44	12.465
Ctrl MO PO	Partial Overlap	h2b2	7.727	507.698	174.592	1288.778	12.465
Ctrl MO PO	Partial Overlap	h2b2	7.727	455.807	168.683	1425.873	12.465
Ctrl MO PO	Partial Overlap	h2b2	7.727	382.991	158.127	2016.481	12.465
Ctrl MO PO	Partial Overlap
Ctrl MO PO	Partial Overlap	h2b3	6.97	620.043	147.853	3808.083	11.246
Ctrl MO PO	Partial Overlap	h2b3	6.97	559.41	154.682	2996.318	11.246
Ctrl MO PO	Partial Overlap	h2b3	6.97	466.383	165.758	1546.676	11.246
Ctrl MO PO	Partial Overlap	h2b3	6.97	404.395	154.698	1150.268	11.246
Ctrl MO PO	Partial Overlap	h2b3	6.97	349.307	151.871	1158.88	11.246
Ctrl MO PO	Partial Overlap	h2b3	6.97	292.87	127.259	720.312	11.246
Ctrl MO PO	Partial Overlap	h2b3	6.97	228.32	130.391	722.282	11.246
Ctrl MO PO	Partial Overlap
Ctrl MO PO	Partial Overlap	h2b4	8.483	606.729	172.566	2021.353	13.706
Ctrl MO PO	Partial Overlap	h2b4	8.483	520.657	181.517	1223.761	13.706
Ctrl MO PO	Partial Overlap	h2b4	8.483	455.495	192.532	1037.657	13.706
Ctrl MO PO	Partial Overlap	h2b4	8.483	380.764	199.624	1120.188	13.706
Ctrl MO PO	Partial Overlap	h2b4	8.483	326.38	154.405	834.848	13.706
Ctrl MO PO	Partial Overlap	h2b4	8.483	279.666	131.273	1190.505	13.706
Ctrl MO PO	Partial Overlap
Ctrl MO PO	Partial Overlap	h2b5	5.403	471.4	160.029	3344.132	8.698
Ctrl MO PO	Partial Overlap	h2b5	5.403	446.47	159.198	3503.235	8.698
Ctrl MO PO	Partial Overlap	h2b5	5.403	402.112	149.748	2877.421	8.698
Ctrl MO PO	Partial Overlap	h2b5	5.403	350.566	166.719	1394.871	8.698
Ctrl MO PO	Partial Overlap	h2b5	5.403	301.422	144.96	1010.243	8.698
Ctrl MO PO	Partial Overlap	h2b5	5.403	242.418	126.106	575.782	8.698
Ctrl MO PO	Partial Overlap	h3b1	7.889	293.19	119.514	753.354	12.738
Ctrl MO PO	Partial Overlap	h3b1	7.889	244.591	117.697	1021.324	12.738
Ctrl MO PO	Partial Overlap	h3b1	7.889	205.322	104.721	785.985	12.738
Ctrl MO PO	Partial Overlap	h3b1	7.889	177.588	110.031	434.79	12.738
Ctrl MO PO	Partial Overlap	h3b1	7.889	167.89	104.845	405.799	12.738
Ctrl MO PO	Partial Overlap
Ctrl MO PO	Partial Overlap	h3b2	10.104	660.343	177.88	2024.857	16.342
Ctrl MO PO	Partial Overlap	h3b2	10.104	610.956	214.953	1860.509	16.342
Ctrl MO PO	Partial Overlap	h3b2	10.104	505.969	179.584	1381.153	16.342
Ctrl MO PO	Partial Overlap	h3b2	10.104	365.042	157.48	1640.795	16.342
Ctrl MO PO	Partial Overlap	h3b2	10.104	269.397	119.116	1144.999	16.342
Ctrl MO PO	Partial Overlap	h3b2	10.104	216.556	106.536	625.313	16.342
Ctrl MO PO	Partial Overlap	h4b1	5.836	408.561	143.294	1460.63	9.401
Ctrl MO PO	Partial Overlap	h4b1	5.836	385.638	130.375	1306.609	9.401
Ctrl MO PO	Partial Overlap	h4b1	5.836	355.623	134.53	1141.134	9.401
Ctrl MO PO	Partial Overlap	h4b1	5.836	324.815	131.809	838.672	9.401
Ctrl MO PO	Partial Overlap	h4b1	5.836	279.504	114.457	803.205	9.401
Ctrl MO PO	Partial Overlap	h4b1	5.836	251.459	122.514	721.728	9.401
Ctrl MO PO	Partial Overlap	h4b1	5.836	230.996	119.358	663.145	9.401
Ctrl MO PO	Partial Overlap	h5b1	11.023	351.901	138.872	1230.971	17.835
Ctrl MO PO	Partial Overlap	h5b1	11.023	325.004	138.478	1394.312	17.835
Ctrl MO PO	Partial Overlap	h5b1	11.023	305.274	109.58	1757.5	17.835
Ctrl MO PO	Partial Overlap	h5b1	11.023	290.11	113.161	1582.59	17.835
Ctrl MO PO	Partial Overlap	h5b1	11.023	276.084	109.774	984.55	17.835
Ctrl MO PO	Partial Overlap	h5b1	11.023	254.481	107.662	875.436	17.835
Ctrl MO PO	Partial Overlap	h5b1	11.023	235.43	111.263	1009.25	17.835
Ctrl MO PO	Partial Overlap	h5b1	11.023	218.177	106.433	1682.699	17.835
Ctrl MO PO	Partial Overlap
Ctrl MO PO	Partial Overlap	h5b2	5.998	488.409	195.645	1428.006	9.664
Ctrl MO PO	Partial Overlap	h5b2	5.998	497.443	184.296	1818.689	9.664
Ctrl MO PO	Partial Overlap	h5b2	5.998	483.588	170.953	1831.678	9.664
Ctrl MO PO	Partial Overlap	h5b2	5.998	436.146	187.236	1197.693	9.664
Ctrl MO PO	Partial Overlap	h5b2	5.998	378.999	179.426	960.348	9.664
Ctrl MO PO	Partial Overlap	h5b2	5.998	320.914	157.057	799.005	9.664
Ctrl MO PO	Partial Overlap	h5b2	5.998	250.76	146.608	534.453	9.664
Ctrl MO PO	Partial Overlap	h5b2	5.998	215.708	129.256	439.697	9.664
Ctrl MO PO	Partial Overlap	h5b2	5.998	191.501	119.531	363.125	9.664
Ctrl MO PO	Partial Overlap	h5b2	5.998	170.739	108.641	311.853	9.664
Ctrl MO PO	Partial Overlap
Ctrl MO PO	Partial Overlap	h5b3	7.835	393.097	115.565	936.904	12.652
Ctrl MO PO	Partial Overlap	h5b3	7.835	420.01	148.175	1071.59	12.652
Ctrl MO PO	Partial Overlap	h5b3	7.835	460.507	149.588	1271.075	12.652
Ctrl MO PO	Partial Overlap	h5b3	7.835	499.208	143.378	1355.234	12.652
Ctrl MO PO	Partial Overlap	h5b3	7.835	510.534	153.273	1305.852	12.652
Ctrl MO PO	Partial Overlap	h5b3	7.835	511.825	135.423	1326.558	12.652
Ctrl MO PO	Partial Overlap	h5b3	7.835	475.778	112.133	1617.009	12.652
Ctrl MO PO	Partial Overlap	h5b3	7.835	383.706	126.713	1351.568	12.652
Ctrl MO PO	Partial Overlap	h5b3	7.835	285.125	118.846	883.064	12.652
Ctrl MO PO	Partial Overlap	h5b3	7.835	229.608	104.667	693.694	12.652
Ctrl MO PO	Partial Overlap	h5b3	7.835	186.362	111.064	407.832	12.652
Ctrl MO PO	Partial Overlap
Ctrl MO PO	Partial Overlap	h5b4	12.968	371.441	115.993	1557.691	20.998
Ctrl MO PO	Partial Overlap	h5b4	12.968	371.06	115.866	1280.639	20.998
Ctrl MO PO	Partial Overlap	h5b4	12.968	353.847	129.212	1054.945	20.998
Ctrl MO PO	Partial Overlap	h5b4	12.968	311.635	123.989	1014.486	20.998
Ctrl MO PO	Partial Overlap	h5b4	13.4	314.682	118.642	2529.098	21.701
Ctrl MO PO	Partial Overlap	h5b4	13.4	289.368	115.755	2513.179	21.701
Ctrl MO PO	Partial Overlap	h5b4	13.4	247.921	111.868	1317.155	21.701
Ctrl MO PO	Partial Overlap	h5b4	13.4	200.522	101.976	767.01	21.701
Ctrl MO PO	Partial Overlap	h5b4	13.4	175.993	101.226	474.041	21.701
Ctrl MO PO	Partial Overlap	h5b4	13.4	162.433	101.257	447.941	21.701
Ctrl MO PO	Partial Overlap	h5b4	13.4	153.617	95.881	416.749	21.701
Ctrl MO NO	No Overlap	h1b1	7.241	820.808	171.401	3375.794	11.685
Ctrl MO NO	No Overlap	h1b1	7.241	790.947	193.975	3191.083	11.685
Ctrl MO NO	No Overlap	h1b1	7.241	643.825	161.679	2085.459	11.685
Ctrl MO NO	No Overlap	h1b1	7.241	433.53	135.08	1265.415	11.685
Ctrl MO NO	No Overlap	h1b1	7.241	257.154	132.991	547.498	11.685
Ctrl MO NO	No Overlap	h1b1	7.241	200.4	121.399	369.125	11.685
Ctrl MO NO	No Overlap
Ctrl MO NO	No Overlap	h1b2	8.267	804.984	289.131	3735.8	13.354
Ctrl MO NO	No Overlap	h1b2	8.267	793.549	311.994	4020.688	13.354
Ctrl MO NO	No Overlap	h1b2	8.267	680.519	253.201	2952.494	13.354
Ctrl MO NO	No Overlap	h1b2	8.267	514.541	213.367	1216.308	13.354
Ctrl MO NO	No Overlap	h1b2	8.267	367.476	169.47	770.13	13.354
Ctrl MO NO	No Overlap	h1b2	8.267	255.563	123.18	795.81	13.354
Ctrl MO NO	No Overlap	h1b2	8.267	207.847	114.606	585.465	13.354
Ctrl MO NO	No Overlap
Ctrl MO NO	No Overlap	h1b3	10.158	459.797	136.512	2596.662	16.43
Ctrl MO NO	No Overlap	h1b3	10.158	448.567	151.038	1995.226	16.43
Ctrl MO NO	No Overlap	h1b3	10.158	421.345	135.782	1657.3	16.43
Ctrl MO NO	No Overlap	h1b3	10.158	365.671	124.543	1409.747	16.43
Ctrl MO NO	No Overlap	h1b3	10.158	306.228	125.466	811.092	16.43
Ctrl MO NO	No Overlap	h1b3	10.158	272.017	137.543	565.078	16.43
Ctrl MO NO	No Overlap	h1b3	10.158	240.367	138.271	738.36	16.43
Ctrl MO NO	No Overlap	h1b3	10.158	210.338	119.594	754.045	16.43
Ctrl MO NO	No Overlap
Ctrl MO NO	No Overlap	h1b4	10.915	444.451	113.525	1758.3	17.66
Ctrl MO NO	No Overlap	h1b4	10.915	463.367	127.849	1516.921	17.66
Ctrl MO NO	No Overlap	h1b4	10.915	461.246	127.125	1623.059	17.66
Ctrl MO NO	No Overlap	h1b4	10.915	420.251	128.806	2134.479	17.66
Ctrl MO NO	No Overlap	h1b4	10.915	377.874	110.942	2076.978	17.66
Ctrl MO NO	No Overlap	h1b4	10.915	324.188	137.365	1313.371	17.66
Ctrl MO NO	No Overlap
Ctrl MO NO	No Overlap	h1b5	8.916	590.363	145.345	2068.473	14.409
Ctrl MO NO	No Overlap	h1b5	8.916	466.463	155.208	1354.751	14.409
Ctrl MO NO	No Overlap	h1b5	8.916	350.417	132.748	1329.919	14.409
Ctrl MO NO	No Overlap	h1b5	8.916	247.6	113.775	638.577	14.409
Ctrl MO NO	No Overlap	h1b5	8.916	206.981	110.336	526.549	14.409
Ctrl MO NO	No Overlap	h1b5	8.916	183.176	108.109	446.908	14.409
Ctrl MO NO	No Overlap	h1b5	8.916	158.226	102.314	371.227	14.409
Ctrl MO NO	No Overlap	h2b1	7.187	752.151	199.035	3455.286	11.586
Ctrl MO NO	No Overlap	h2b1	7.187	685.656	206.062	2378.917	11.586
Ctrl MO NO	No Overlap	h2b1	7.187	576.686	234.821	1757.061	11.586
Ctrl MO NO	No Overlap	h2b1	7.187	477.271	196.96	1530.366	11.586
Ctrl MO NO	No Overlap	h2b1	7.187	376.122	174.087	1470.426	11.586
Ctrl MO NO	No Overlap	h2b1	7.187	326.41	139.423	1344.173	11.586
Ctrl MO NO	No Overlap	h2b1	7.187	289.236	123.276	1017.309	11.586
Ctrl MO NO	No Overlap
Ctrl MO NO	No Overlap	h2b2	9.456	734.015	186.643	4095	15.287
Ctrl MO NO	No Overlap	h2b2	9.456	641.672	173.149	4017.052	15.287
Ctrl MO NO	No Overlap	h2b2	9.456	509.825	157.702	2162.901	15.287
Ctrl MO NO	No Overlap	h2b2	9.456	386.008	160.037	1246.012	15.287
Ctrl MO NO	No Overlap	h2b2	9.456	281.087	120.65	1161.889	15.287
Ctrl MO NO	No Overlap	h2b2	9.456	219.942	115.92	825.854	15.287
Ctrl MO NO	No Overlap
Ctrl MO NO	No Overlap	h2b3	8.97	541.53	135.961	2843.013	14.497
Ctrl MO NO	No Overlap	h2b3	8.97	560.038	145.111	2945.336	14.497
Ctrl MO NO	No Overlap	h2b3	8.97	523.346	152.893	1843.322	14.497
Ctrl MO NO	No Overlap	h2b3	8.97	471.447	146.578	1312.041	14.497
Ctrl MO NO	No Overlap	h2b3	8.97	400.707	147.775	917.163	14.497
Ctrl MO NO	No Overlap	h2b3	8.916	491.177	166.024	2040.918	14.409
Ctrl MO NO	No Overlap	h2b3	8.916	394.878	144.368	1132.459	14.409
Ctrl MO NO	No Overlap	h2b3	8.916	305.265	127.82	1369.89	14.409
Ctrl MO NO	No Overlap	h2b3	8.916	261.073	141.438	2304.981	14.409
Ctrl MO NO	No Overlap
Ctrl MO NO	No Overlap	h2b4	9.132	672.622	160.513	2652.778	14.76
Ctrl MO NO	No Overlap	h2b4	9.132	623.606	163.678	2231.111	14.76
Ctrl MO NO	No Overlap	h2b4	9.132	553.404	187.101	2463.856	14.76
Ctrl MO NO	No Overlap	h2b4	9.132	467.399	208.598	1861.942	14.76
Ctrl MO NO	No Overlap	h2b4	9.132	362.224	181.048	921.462	14.76
Ctrl MO NO	No Overlap	h2b4	9.132	305.654	155.652	971.025	14.76
Ctrl MO NO	No Overlap
Ctrl MO NO	No Overlap	h2b5	9.618	562.96	155.543	2231.941	15.551
Ctrl MO NO	No Overlap	h2b5	9.618	495.68	175.664	1711.377	15.551
Ctrl MO NO	No Overlap	h2b5	9.618	408.908	146.099	1191.4	15.551
Ctrl MO NO	No Overlap	h2b5	9.618	306.052	133.72	751.587	15.551
Ctrl MO NO	No Overlap	h2b5	9.618	237.44	114.354	568.14	15.551
Ctrl MO NO	No Overlap	h2b5	9.618	205.259	117.578	513.448	15.551
Ctrl MO NO	No Overlap
Ctrl MO NO	No Overlap	h2b6	10.158	553.567	150.265	4095	16.389
Ctrl MO NO	No Overlap	h2b6	10.158	567.833	147.995	4095	16.389
Ctrl MO NO	No Overlap	h2b6	10.158	543.395	154.933	4095	16.389
Ctrl MO NO	No Overlap	h2b6	10.158	477.351	164.483	2834.109	16.389
Ctrl MO NO	No Overlap	h2b6	10.158	373.136	146.228	1170.889	16.389
Ctrl MO NO	No Overlap	h2b6	10.158	297.757	129.668	819.881	16.389
Ctrl MO NO	No Overlap	h2b6	10.158	258.607	125.611	702.138	16.389
Ctrl MO NO	No Overlap	h3b1	10.645	471.64	129.378	1789.482	17.22
Ctrl MO NO	No Overlap	h3b1	10.645	457.615	136.208	1734.408	17.22
Ctrl MO NO	No Overlap	h3b1	10.645	429.902	143.788	1544.178	17.22
Ctrl MO NO	No Overlap	h3b1	10.645	390.64	151.406	1427.126	17.22
Ctrl MO NO	No Overlap	h3b1	10.645	307	134.079	1220.19	17.22
Ctrl MO NO	No Overlap	h3b1	10.645	227.995	123.631	1039.106	17.22
Ctrl MO NO	No Overlap
Ctrl MO NO	No Overlap	h3b2	11.401	371.165	108.893	1283.004	18.45
Ctrl MO NO	No Overlap	h3b2	11.401	378.808	116.803	1349.341	18.45
Ctrl MO NO	No Overlap	h3b2	11.401	313.713	120.628	1269.697	18.45
Ctrl MO NO	No Overlap	h3b2	11.401	242.924	121.912	831.857	18.45
Ctrl MO NO	No Overlap	h3b2	11.401	188.115	108.041	345.067	18.45
Ctrl MO NO	No Overlap	h3b2	11.401	158.774	107.712	296.226	18.45
Ctrl MO NO	No Overlap
Ctrl MO NO	No Overlap	h3b3	6.646	480.074	142.088	1165.232	10.719
Ctrl MO NO	No Overlap	h3b3	6.646	409.918	117.465	1153.721	10.719
Ctrl MO NO	No Overlap	h3b3	6.646	329.024	138.812	821.053	10.719
Ctrl MO NO	No Overlap	h3b3	6.646	247.658	116.642	829	10.719
Ctrl MO NO	No Overlap	h4b1	9.078	455.464	143.72	2539.129	14.672
Ctrl MO NO	No Overlap	h4b1	9.078	385.972	118.276	1449.161	14.672
Ctrl MO NO	No Overlap	h4b1	9.078	307.743	136.866	908.464	14.672
Ctrl MO NO	No Overlap	h4b1	9.078	266.385	120.017	687.736	14.672
Ctrl MO NO	No Overlap	h4b1	9.078	234.855	122.494	515.639	14.672
Ctrl MO NO	No Overlap	h4b1	9.078	201.082	110.247	399.443	14.672
Ctrl MO NO	No Overlap
Ctrl MO NO	No Overlap	h4b2	6.214	363.771	136.049	1074.076	10.006
Ctrl MO NO	No Overlap	h4b2	6.214	297.007	120.981	995.848	10.006
Ctrl MO NO	No Overlap	h4b2	6.214	251.112	117.69	865.76	10.006
Ctrl MO NO	No Overlap	h4b2	6.214	229.677	115.48	809.454	10.006
Ctrl MO NO	No Overlap	h4b2	6.214	211.616	114.446	545.581	10.006
Ctrl MO NO	No Overlap	h4b2	6.214	194.116	110.985	474.81	10.006
Ctrl MO NO	No Overlap
Ctrl MO NO	No Overlap	h4b3	9.51	449.525	147.173	1169.643	15.375
Ctrl MO NO	No Overlap	h4b3	9.51	412.216	152.109	1317.846	15.375
Ctrl MO NO	No Overlap	h4b3	9.51	332.898	124.908	929.844	15.375
Ctrl MO NO	No Overlap	h4b3	9.51	271.959	128.562	703.822	15.375
Ctrl MO NO	No Overlap	h4b3	9.51	211.857	119.659	416.995	15.375
Ctrl MO NO	No Overlap	h4b3	9.51	169.495	105.032	399.518	15.375
Ctrl MO NO	No Overlap	h4b3	9.51	143.107	99.7	280.777	15.375
Ctrl MO NO	No Overlap
Ctrl MO NO	No Overlap	h4b4	10.158	365.185	145.725	1102.658	16.43
Ctrl MO NO	No Overlap	h4b4	10.158	342.205	129.885	1353.953	16.43
Ctrl MO NO	No Overlap	h4b4	10.158	276.648	119.375	997.652	16.43
Ctrl MO NO	No Overlap	h4b4	10.158	202.664	107.357	633.846	16.43
Ctrl MO NO	No Overlap	h4b4	10.158	170.231	98.781	351.938	16.43
Ctrl MO NO	No Overlap	h5b1	10.158	530.287	180.898	2059.45	16.43
Ctrl MO NO	No Overlap	h5b1	10.158	500.1	152.085	2066.656	16.43
Ctrl MO NO	No Overlap	h5b1	10.158	450.277	152.624	1754.794	16.43
Ctrl MO NO	No Overlap	h5b1	10.158	403.175	137.03	1428.671	16.43
Ctrl MO NO	No Overlap	h5b1	10.158	327.941	137.053	1025.07	16.43
Ctrl MO NO	No Overlap	h5b1	10.158	258.021	137.859	421.397	16.43
Ctrl MO NO	No Overlap	h5b1	10.158	207.186	120.698	366.958	16.43
Ctrl MO NO	No Overlap	h5b1	10.158	168.795	109.298	297.478	16.43
Ctrl MO NO	No Overlap
Ctrl MO NO	No Overlap	h5b2	10.645	559.532	154.8	2507.568	17.217
Ctrl MO NO	No Overlap	h5b2	10.645	523.295	170.495	2291.782	17.217
Ctrl MO NO	No Overlap	h5b2	10.645	481.247	145.922	1604.37	17.217
Ctrl MO NO	No Overlap	h5b2	10.645	415.436	155.461	1588.649	17.217
Ctrl MO NO	No Overlap	h5b2	10.645	359.697	123.825	1399.161	17.217
Ctrl MO NO	No Overlap	h5b2	10.645	309.601	110.893	1092.556	17.217
Ctrl MO NO	No Overlap	h5b2	10.645	263.075	104.195	842.705	17.217
Ctrl MO NO	No Overlap	h5b2	10.645	199.984	105.034	484.701	17.217
Ctrl MO NO	No Overlap
Ctrl MO NO	No Overlap	h5b3	7.349	566.716	140.57	1827.625	11.861
Ctrl MO NO	No Overlap	h5b3	7.349	542.147	136.042	2084.098	11.861
Ctrl MO NO	No Overlap	h5b3	7.349	500.644	136.797	1850.213	11.861
Ctrl MO NO	No Overlap	h5b3	7.349	437.07	131.677	1312.347	11.861
Ctrl MO NO	No Overlap	h5b3	7.349	347.689	120.405	1125.27	11.861
Ctrl MO NO	No Overlap	h5b3	7.349	277.795	135.472	981.654	11.861
Ctrl MO NO	No Overlap	h5b3	7.349	220.103	122.831	483.377	11.861
Ctrl MO NO	No Overlap	h5b3	7.349	177.905	109.766	350.4	11.861
Ctrl MO NO	No Overlap	h5b3	7.349	154.124	104.638	281.449	11.861
Ctrl MO NO	No Overlap
Ctrl MO NO	No Overlap	h5b4	8.429	528.602	179.384	1669.178	13.618
Ctrl MO NO	No Overlap	h5b4	8.429	464.099	140.491	1758.942	13.618
Ctrl MO NO	No Overlap	h5b4	8.429	401.966	122.522	1423.305	13.618
Ctrl MO NO	No Overlap	h5b4	8.429	350.376	122.875	1135.366	13.618
Ctrl MO NO	No Overlap	h5b4	8.429	291.05	118.889	885.639	13.618
Ctrl MO NO	No Overlap	h5b4	8.429	230.247	111.664	533.636	13.618
Ctrl MO NO	No Overlap	h5b4	8.429	191.413	106.235	419.239	13.618
Ctrl MO NO	No Overlap
Ctrl MO NO	No Overlap	h5b5	6.484	464.808	140.742	1077.052	10.455
Ctrl MO NO	No Overlap	h5b5	6.484	421.736	132.641	938.954	10.455
Ctrl MO NO	No Overlap	h5b5	6.484	364.919	140.163	800.668	10.455
Ctrl MO NO	No Overlap	h5b5	6.484	317.319	136.51	749.935	10.455
Ctrl MO NO	No Overlap	h5b5	6.484	271.041	142.963	1262.498	10.455
Ctrl MO NO	No Overlap	h5b5	6.484	242.852	127.481	2125.947	10.455
Ctrl MO NO	No Overlap	h5b5	6.484	220.051	114.876	1938.513	10.455
Ctrl MO NO	No Overlap	h5b5	6.484	194.798	112.566	897.103	10.455
Ecad MO CO	Complete Overlap	h1b1	7.781	533.139	179.644	1972.784	12.564
Ecad MO CO	Complete Overlap	h1b1	7.781	461.566	162.422	1188.174	12.564
Ecad MO CO	Complete Overlap	h1b1	7.781	367.006	157.35	968.896	12.564
Ecad MO CO	Complete Overlap	h1b1	7.781	299.263	137.578	892.677	12.564
Ecad MO CO	Complete Overlap	h1b1	7.781	249.994	113.572	811.759	12.564
Ecad MO CO	Complete Overlap	h1b1	7.781	217.102	110.331	662.853	12.564
Ecad MO CO	Complete Overlap
Ecad MO CO	Complete Overlap	h1b2	6.7	437.178	149.349	1179.505	10.807
Ecad MO CO	Complete Overlap	h1b2	6.7	347.127	136.602	1006.823	10.807
Ecad MO CO	Complete Overlap	h1b2	6.7	294.917	123.299	1004.654	10.807
Ecad MO CO	Complete Overlap	h1b2	6.7	263.341	115.99	1139.045	10.807
Ecad MO CO	Complete Overlap	h1b2	6.7	238.742	103.317	1369.554	10.807
Ecad MO CO	Complete Overlap
Ecad MO CO	Complete Overlap	h1b3	4.539	438.797	201.522	1521.592	7.292
Ecad MO CO	Complete Overlap	h1b3	4.539	362.189	135.694	1062.471	7.292
Ecad MO CO	Complete Overlap	h1b3	4.539	273.586	124.549	612.562	7.292
Ecad MO CO	Complete Overlap	h1b3	4.539	219.717	121.351	421.895	7.292
Ecad MO CO	Complete Overlap	h1b3	4.539	184.037	106.617	322.987	7.292
Ecad MO CO	Complete Overlap	h1b3	4.539	162.687	108.31	286.554	7.292
Ecad MO CO	Complete Overlap
Ecad MO CO	Complete Overlap	h1b4	6.592	383.004	149.898	1226.302	10.631
Ecad MO CO	Complete Overlap	h1b4	6.592	328.584	126.202	1038.569	10.631
Ecad MO CO	Complete Overlap	h1b4	6.592	297.277	114.092	1243.453	10.631
Ecad MO CO	Complete Overlap	h1b4	6.592	247.633	114.115	1282.425	10.631
Ecad MO CO	Complete Overlap	h1b4	6.592	213.956	106.63	1086.418	10.631
Ecad MO CO	Complete Overlap	h1b4	6.592	197.854	100.991	930.834	10.631
Ecad MO CO	Complete Overlap	h1b4	6.592	186.898	100.283	649.99	10.631
Ecad MO CO	Complete Overlap
Ecad MO CO	Complete Overlap	h1b5	4.269	572.3	225.571	1279.67	6.853
Ecad MO CO	Complete Overlap	h1b5	4.269	422.864	200.822	767.084	6.853
Ecad MO CO	Complete Overlap	h1b5	4.269	318.151	164.66	555.056	6.853
Ecad MO CO	Complete Overlap	h1b5	4.269	247.667	132.761	414.527	6.853
Ecad MO CO	Complete Overlap	h1b5	4.269	204.47	129.539	343.897	6.853
Ecad MO CO	Complete Overlap	h1b5	4.269	184.898	122.234	289.725	6.853
Ecad MO CO	Complete Overlap
Ecad MO CO	Complete Overlap	h1b6	6.214	481.923	191.463	1316.508	10.016
Ecad MO CO	Complete Overlap	h1b6	6.214	426.737	179.448	942.936	10.016
Ecad MO CO	Complete Overlap	h1b6	6.214	350.641	163.073	953.338	10.016
Ecad MO CO	Complete Overlap	h1b6	6.214	289.42	136.331	775.99	10.016
Ecad MO CO	Complete Overlap	h1b6	6.214	237.826	127.107	537.008	10.016
Ecad MO CO	Complete Overlap	h1b6	6.214	201.508	115.375	395.965	10.016
Ecad MO CO	Complete Overlap
Ecad MO CO	Complete Overlap	h1b7	9.78	577.646	147.958	1400.561	15.815
Ecad MO CO	Complete Overlap	h1b7	9.78	461.195	152.424	1003.163	15.815
Ecad MO CO	Complete Overlap	h1b7	9.78	345.264	155.707	739.53	15.815
Ecad MO CO	Complete Overlap	h1b7	9.78	259.381	140.164	454.951	15.815
Ecad MO CO	Complete Overlap	h1b7	9.78	207.991	132.264	348.238	15.815
Ecad MO CO	Complete Overlap	h1b7	9.78	169.722	110.185	289.865	15.815
Ecad MO CO	Complete Overlap
Ecad MO CO	Complete Overlap	h1b8	7.673	507.994	174.297	1183.24	12.388
Ecad MO CO	Complete Overlap	h1b8	7.673	356.526	181.175	1075.647	12.388
Ecad MO CO	Complete Overlap	h1b8	7.673	263.737	138.815	765.368	12.388
Ecad MO CO	Complete Overlap	h1b8	7.673	218.248	122.267	1300.368	12.388
Ecad MO CO	Complete Overlap	h1b8	7.673	191.897	123.254	1517.87	12.388
Ecad MO CO	Complete Overlap	h1b8	7.673	164.933	107.39	1007.219	12.388
Ecad MO CO	Complete Overlap
Ecad MO CO	Complete Overlap	h1b9	9.564	635.064	175.727	1529.813	15.463
Ecad MO CO	Complete Overlap	h1b9	9.564	410.486	161.969	833.396	15.463
Ecad MO CO	Complete Overlap	h1b9	9.564	307.264	120.411	576.045	15.463
Ecad MO CO	Complete Overlap	h1b9	9.564	257.748	143.892	463.181	15.463
Ecad MO CO	Complete Overlap	h1b9	9.564	200.369	126.928	346.006	15.463
Ecad MO CO	Complete Overlap	h1b9	9.564	167.994	107.842	351.224	15.463
Ecad MO CO	Complete Overlap
Ecad MO CO	Complete Overlap	h1b10	8.916	479.762	141.051	1474.343	14.409
Ecad MO CO	Complete Overlap	h1b10	8.916	379.574	152.639	1178.624	14.409
Ecad MO CO	Complete Overlap	h1b10	8.916	298.407	137.401	790.47	14.409
Ecad MO CO	Complete Overlap	h1b10	8.916	239.723	113.926	566.867	14.409
Ecad MO CO	Complete Overlap	h1b10	8.916	205.84	112.374	469.551	14.409
Ecad MO CO	Complete Overlap	h1b10	8.916	190.093	105.844	460.884	14.409
Ecad MO CO	Complete Overlap
Ecad MO CO	Complete Overlap	h1b11	7.024	545.466	154.643	1448.464	11.334
Ecad MO CO	Complete Overlap	h1b11	7.024	401.12	153.521	1063.351	11.334
Ecad MO CO	Complete Overlap	h1b11	7.024	298.071	120.7	586.903	11.334
Ecad MO CO	Complete Overlap	h1b11	7.024	232.278	118.024	444.373	11.334
Ecad MO CO	Complete Overlap	h1b11	7.024	197.478	118.021	315.856	11.334
Ecad MO CO	Complete Overlap
Ecad MO CO	Complete Overlap	h1b12	8.916	477.595	185.948	1391.65	14.409
Ecad MO CO	Complete Overlap	h1b12	8.916	445.429	137.839	1202.536	14.409
Ecad MO CO	Complete Overlap	h1b12	8.916	414.242	165.588	968.678	14.409
Ecad MO CO	Complete Overlap	h1b12	8.916	359.955	138.12	714.849	14.409
Ecad MO CO	Complete Overlap	h1b12	8.916	313.319	119.277	1201.853	14.409
Ecad MO CO	Complete Overlap	h1b12	8.916	288.902	121.501	1301.262	14.409
Ecad MO CO	Complete Overlap	h1b12	8.916	261.683	121.777	929.37	14.409
Ecad MO CO	Complete Overlap	h2b1	9.726	727.965	195.003	3847.593	15.727
Ecad MO CO	Complete Overlap	h2b1	9.726	423.138	171.635	1001.891	15.727
Ecad MO CO	Complete Overlap	h2b1	9.726	286.166	126.183	1412.88	15.727
Ecad MO CO	Complete Overlap	h2b1	9.726	239.787	117.591	951.975	15.727
Ecad MO CO	Complete Overlap
Ecad MO CO	Complete Overlap	h2b2	9.942	717.725	161.168	3136.901	16.078
Ecad MO CO	Complete Overlap	h2b2	9.942	584.769	159.962	2138.896	16.078
Ecad MO CO	Complete Overlap	h2b2	9.942	365.398	141.807	909.806	16.078
Ecad MO CO	Complete Overlap	h2b2	9.942	254.769	108.865	712.081	16.078
Ecad MO CO	Complete Overlap	h2b2	9.942	204.787	106.096	569.343	16.078
Ecad MO CO	Complete Overlap
Ecad MO CO	Complete Overlap	h2b3	9.834	582.217	194.94	1705.48	15.902
Ecad MO CO	Complete Overlap	h2b3	9.834	653.018	212.728	2873.453	15.902
Ecad MO CO	Complete Overlap	h2b3	9.834	575.864	217.801	2579.465	15.902
Ecad MO CO	Complete Overlap	h2b3	9.834	423.874	178.779	2007.94	15.902
Ecad MO CO	Complete Overlap	h2b3	9.834	311.838	147.091	1641.128	15.902
Ecad MO CO	Complete Overlap
Ecad MO CO	Complete Overlap	h2b4	8.213	761.373	172.556	3081.817	13.267
Ecad MO CO	Complete Overlap	h2b4	8.213	554.294	134.813	1654.013	13.267
Ecad MO CO	Complete Overlap	h2b4	8.213	382.953	156.08	1118.068	13.267
Ecad MO CO	Complete Overlap	h2b4	8.213	284.54	124.978	958.038	13.267
Ecad MO CO	Complete Overlap
Ecad MO CO	Complete Overlap	h2b5	8.375	706.324	185.425	2450.066	13.527
Ecad MO CO	Complete Overlap	h2b5	8.375	448.722	159.544	1367.841	13.527
Ecad MO CO	Complete Overlap	h2b5	8.375	274.03	138.245	1814.253	13.527
Ecad MO CO	Complete Overlap	h2b5	8.375	186.967	103.302	588.531	13.527
Ecad MO CO	Complete Overlap
Ecad MO CO	Complete Overlap	h2b6	7.997	959.572	267.652	2837.279	12.915
Ecad MO CO	Complete Overlap	h2b6	7.997	552.735	178.658	1565.045	12.915
Ecad MO CO	Complete Overlap	h2b6	7.997	306.238	133.809	862.502	12.915
Ecad MO CO	Complete Overlap	h2b6	7.997	209.519	109.742	455.542	12.915
Ecad MO CO	Complete Overlap
Ecad MO CO	Complete Overlap	h3b1	14.859	497.208	113.614	3867.396	24.073
Ecad MO CO	Complete Overlap	h3b1	14.859	484.84	113.258	3402.178	24.073
Ecad MO CO	Complete Overlap	h3b1	15.454	438.891	134.425	1979.497	25.04
Ecad MO CO	Complete Overlap	h3b1	15.454	396.601	127.714	1675.957	25.04
Ecad MO CO	Complete Overlap	h3b1	15.454	348.245	109.923	1706.555	25.04
Ecad MO CO	Complete Overlap	h3b1	15.454	276.646	115.458	1133.303	25.04
Ecad MO CO	Complete Overlap	h3b1	15.454	204.303	96.434	589.49	25.04
Ecad MO CO	Complete Overlap
Ecad MO CO	Complete Overlap	h3b2	8.105	548.883	156.643	4095	13.091
Ecad MO CO	Complete Overlap	h3b2	8.105	519.871	147.311	4095	13.091
Ecad MO CO	Complete Overlap	h3b2	8.105	392.198	153.55	1531.098	13.091
Ecad MO CO	Complete Overlap	h3b2	8.105	299.262	141.815	858.536	13.091
Ecad MO CO	Complete Overlap	h3b2	8.105	238.835	112.309	860.525	13.091
Ecad MO CO	Complete Overlap	h3b2	8.105	189.51	109.412	557.852	13.091
Ecad MO CO	Complete Overlap	h3b2	8.105	152.448	101.927	286.48	13.091
Ecad MO CO	Complete Overlap
Ecad MO CO	Complete Overlap	h3b3	9.402	464.864	149.198	1372.728	15.199
Ecad MO CO	Complete Overlap	h3b3	9.402	486.692	166.347	1492.808	15.199
Ecad MO CO	Complete Overlap	h3b3	9.402	464.637	139.825	1328.325	15.199
Ecad MO CO	Complete Overlap	h3b3	9.402	423.085	141.525	1415.358	15.199
Ecad MO CO	Complete Overlap	h3b3	9.402	360.525	123.428	2678.681	15.199
Ecad MO CO	Complete Overlap	h3b3	9.402	297.772	110.359	3577.78	15.199
Ecad MO CO	Complete Overlap	h3b3	9.402	251.626	108.362	1693.714	15.199
Ecad MO CO	Complete Overlap
Ecad MO CO	Complete Overlap	h3b4	16.534	545.826	177.141	2308.79	26.797
Ecad MO CO	Complete Overlap	h3b4	16.534	598.574	167.031	2578.601	26.797
Ecad MO CO	Complete Overlap	h3b4	16.534	576.686	148.17	2347.028	26.797
Ecad MO CO	Complete Overlap	h3b4	16.534	481.46	136.004	2386.551	26.797
Ecad MO CO	Complete Overlap	h3b4	16.534	391.68	120.243	1267.401	26.797
Ecad MO CO	Complete Overlap	h3b4	16.534	317.467	130.772	1647.542	26.797
Ecad MO CO	Complete Overlap	h3b4	16.534	247.677	108.431	1756.638	26.797
Ecad MO CO	Complete Overlap	h3b4	16.534	196.835	107.223	1126.296	26.797
Ecad MO CO	Complete Overlap
Ecad MO CO	Complete Overlap	h3b5	16.534	576.686	148.17	2347.028	26.797
Ecad MO CO	Complete Overlap	h3b5	16.534	481.46	136.004	2386.551	26.797
Ecad MO CO	Complete Overlap	h3b5	16.534	391.68	120.243	1267.401	26.797
Ecad MO CO	Complete Overlap	h3b5	16.534	317.467	130.772	1647.542	26.797
Ecad MO CO	Complete Overlap	h3b5	16.534	247.677	108.431	1756.638	26.797
Ecad MO CO	Complete Overlap
Ecad MO CO	Complete Overlap	h3b6	3.836	470.321	147.54	1712.762	6.15
Ecad MO CO	Complete Overlap	h3b6	3.836	405.15	132.895	1834.761	6.15
Ecad MO CO	Complete Overlap	h3b6	3.836	323.355	133.219	1059.923	6.15
Ecad MO CO	Complete Overlap	h3b6	3.836	240.028	116.482	503.118	6.15
Ecad MO CO	Complete Overlap	h3b6	3.836	182.16	106.61	335.504	6.15
Ecad MO CO	Complete Overlap	h3b6	3.836	158.777	106.44	351.051	6.15
Ecad MO CO	Complete Overlap
Ecad MO CO	Complete Overlap	h3b7	8.591	455.774	139.453	1336.955	13.879
Ecad MO CO	Complete Overlap	h3b7	8.591	428.494	124.081	1485.517	13.879
Ecad MO CO	Complete Overlap	h3b7	8.591	352.508	125.375	1114.455	13.879
Ecad MO CO	Complete Overlap	h3b7	8.591	270.613	141.625	564.34	13.879
Ecad MO CO	Complete Overlap	h3b7	8.591	213.771	119.512	393.704	13.879
Ecad MO CO	Complete Overlap	h3b7	8.591	172.879	99.956	262.581	13.879
Ecad MO CO	Complete Overlap	h3b7	8.591	149.545	102.987	241.712	13.879
Ecad MO CO	Complete Overlap
Ecad MO CO	Complete Overlap	h3b8	6.97	438.065	106.388	1742.559	11.246
Ecad MO CO	Complete Overlap	h3b8	6.97	343.452	122.498	1432.517	11.246
Ecad MO CO	Complete Overlap	h3b8	6.97	266.945	115.956	782.756	11.246
Ecad MO CO	Complete Overlap	h3b8	6.97	214.243	113.212	501.804	11.246
Ecad MO CO	Complete Overlap	h3b8	6.97	177.252	110.692	376.494	11.246
Ecad MO CO	Complete Overlap
Ecad MO CO	Complete Overlap	h3b9	7.511	400.451	145.236	1448.02	12.124
Ecad MO CO	Complete Overlap	h3b9	7.511	319.651	137.144	1061.729	12.124
Ecad MO CO	Complete Overlap	h3b9	7.511	263.708	137.415	742.443	12.124
Ecad MO CO	Complete Overlap	h3b9	7.511	226.576	131.253	526.545	12.124
Ecad MO CO	Complete Overlap	h3b9	7.511	198.383	112.216	353.715	12.124
Ecad MO CO	Complete Overlap	h3b9	7.511	173.445	100.038	394.807	12.124
Ecad MO CO	Complete Overlap	h3b9	7.511	153.52	103.288	287.623	12.124
Ecad MO CO	Complete Overlap
Ecad MO CO	Complete Overlap	h3b10	11.347	382.658	135.92	2028.724	18.362
Ecad MO CO	Complete Overlap	h3b10	11.347	382.057	134.209	1223.554	18.362
Ecad MO CO	Complete Overlap	h3b10	11.347	369.195	130.118	1938.718	18.362
Ecad MO CO	Complete Overlap	h3b10	11.347	360.256	141.4	2653.625	18.362
Ecad MO CO	Complete Overlap	h3b10	11.347	334.89	120.766	2820.773	18.362
Ecad MO CO	Complete Overlap	h3b10	11.347	288.372	121.697	3509.877	18.362
Ecad MO CO	Complete Overlap	h3b10	11.347	239.024	102.825	1450.546	18.362
Ecad MO CO	Complete Overlap	h3b10	11.347	200.56	105.075	715.589	18.362
Ecad MO CO	Complete Overlap
Ecad MO CO	Complete Overlap	h3b11	13.076	522.721	137.143	1287.045	21.174
Ecad MO CO	Complete Overlap	h3b11	13.076	422.813	150.054	1039.904	21.174
Ecad MO CO	Complete Overlap	h3b11	13.076	351.746	138.867	1460.825	21.174
Ecad MO CO	Complete Overlap	h3b11	13.076	305.033	126.05	1955.438	21.174
Ecad MO CO	Complete Overlap	h3b11	13.076	259.833	123.664	2075.777	21.174
Ecad MO CO	Complete Overlap	h3b11	13.076	218.783	103.593	1873.4	21.174
Ecad MO CO	Complete Overlap	h3b11	13.076	180.437	104.984	923.054	21.174
Ecad MO CO	Complete Overlap
Ecad MO CO	Complete Overlap	h3b12	6.7	647.702	173.14	2313.599	10.806
Ecad MO CO	Complete Overlap	h3b12	6.7	538.423	154.062	2297.346	10.806
Ecad MO CO	Complete Overlap	h3b12	6.7	396.204	133.277	1243.949	10.806
Ecad MO CO	Complete Overlap	h3b12	6.7	287.669	133.455	650.72	10.806
Ecad MO CO	Complete Overlap	h3b12	6.7	209.886	106.443	437.538	10.806
Ecad MO CO	Complete Overlap	h3b12	6.7	166.567	107.623	307.985	10.806
Ecad MO CO	Complete Overlap	h4b1	11.725	293.959	110.576	2420.091	18.977
Ecad MO CO	Complete Overlap	h4b1	11.725	271.206	114.354	2028.223	18.977
Ecad MO CO	Complete Overlap	h4b1	11.725	229.958	99.659	960.672	18.977
Ecad MO CO	Complete Overlap	h4b1	11.725	189.94	106.03	518.753	18.977
Ecad MO CO	Complete Overlap	h4b1	11.725	165.366	108.92	302.95	18.977
Ecad MO CO	Complete Overlap
Ecad MO CO	Complete Overlap	h4b2	6.16	261.035	107.274	1945.618	9.928
Ecad MO CO	Complete Overlap	h4b2	6.16	245.522	106.721	1389.145	9.928
Ecad MO CO	Complete Overlap	h4b2	6.16	197.791	116.507	500.765	9.928
Ecad MO CO	Complete Overlap	h4b2	6.16	166.588	108.764	315.771	9.928
Ecad MO CO	Complete Overlap
Ecad MO CO	Complete Overlap	h4b3	15.238	257.187	104.175	1373.793	24.688
Ecad MO CO	Complete Overlap	h4b3	15.238	243.012	108.568	1117.388	24.688
Ecad MO CO	Complete Overlap	h4b3	12.05	298.633	115.733	955.038	19.505
Ecad MO CO	Complete Overlap	h4b3	12.05	284.34	119.971	769.491	19.505
Ecad MO CO	Complete Overlap	h4b3	12.05	233.858	112.719	484.208	19.505
Ecad MO CO	Complete Overlap	h4b3	12.05	190.76	108.288	616.942	19.505
Ecad MO CO	Complete Overlap
Ecad MO CO	Complete Overlap	h4b4	5.674	246.49	124.099	572.411	9.137
Ecad MO CO	Complete Overlap	h4b4	5.674	212.406	107.717	604.443	9.137
Ecad MO CO	Complete Overlap	h4b4	5.674	186.532	107.419	455.71	9.137
Ecad MO CO	Complete Overlap	h4b4	5.674	155.781	91.897	318.039	9.137
Ecad MO CO	Complete Overlap
Ecad MO CO	Complete Overlap	h5b1	8.429	151.006	101.799	470.362	13.618
Ecad MO CO	Complete Overlap	h5b1	8.429	151.219	98.777	397.667	13.618
Ecad MO CO	Complete Overlap	h5b1	8.429	150.01	101.06	400.346	13.618
Ecad MO CO	Complete Overlap	h5b1	8.429	148.372	96.388	434.896	13.618
Ecad MO CO	Complete Overlap	h5b1	8.429	142.745	98.308	395.519	13.618
Ecad MO CO	Complete Overlap	h5b1	8.429	137.238	100.996	311.343	13.618
Ecad MO CO	Complete Overlap
Ecad MO CO	Complete Overlap	h5b2	8.862	193.702	99.402	1798.792	14.321
Ecad MO CO	Complete Overlap	h5b2	8.862	185.025	99.156	2865.322	14.321
Ecad MO CO	Complete Overlap	h5b2	8.862	181.925	95.605	3856.428	14.321
Ecad MO CO	Complete Overlap	h5b2	8.862	182.397	98.181	4095	14.321
Ecad MO CO	Complete Overlap	h5b2	8.862	163.89	97.646	3332.81	14.321
Ecad MO CO	Complete Overlap	h5b2	8.862	152.912	95.247	1258.834	14.321
Ecad MO CO	Complete Overlap
Ecad MO CO	Complete Overlap	h5b3	10.321	132.55	97.972	311.791	16.693
Ecad MO CO	Complete Overlap	h5b3	10.321	133.263	98.799	290.464	16.693
Ecad MO CO	Complete Overlap	h5b3	10.321	138.595	97.104	365.922	16.693
Ecad MO CO	Complete Overlap	h5b3	10.321	139.07	96.456	311.743	16.693
Ecad MO CO	Complete Overlap	h5b3	10.321	138.526	99.132	327.896	16.693
Ecad MO CO	Complete Overlap	h5b3	10.321	137.884	98.93	303.538	16.693
Ecad MO CO	Complete Overlap
Ecad MO CO	Complete Overlap	h5b4	8.862	174.614	100.399	2632.923	14.321
Ecad MO CO	Complete Overlap	h5b4	8.862	160.811	98.032	1085.411	14.321
Ecad MO CO	Complete Overlap	h5b4	8.862	150.696	100.863	506.366	14.321
Ecad MO CO	Complete Overlap	h5b4	8.862	142.879	100.464	424.655	14.321
Ecad MO CO	Complete Overlap	h5b4	8.862	139.979	99.316	343.59	14.321
Ecad MO CO	Complete Overlap	h5b4	8.862	138.178	95.939	337.741	14.321
Ecad MO CO	Complete Overlap	h5b4	8.862	137.143	98.079	309.715	14.321
Ecad MO CO	Complete Overlap	h5b4	8.862	139.761	99.223	375.16	14.321
Ecad MO CO	Complete Overlap	h5b4	8.862	138.112	99.459	421.156	14.321
Ecad MO CO	Complete Overlap	h5b4	8.862	139.421	98.498	439.48	14.321
Ecad MO CO	Complete Overlap
Ecad MO CO	Complete Overlap	h5b5	8.862	193.702	99.402	1798.792	14.321
Ecad MO CO	Complete Overlap	h5b5	8.862	185.025	99.156	2865.322	14.321
Ecad MO CO	Complete Overlap	h5b5	8.862	181.925	95.605	3856.428	14.321
Ecad MO CO	Complete Overlap	h5b5	8.862	182.397	98.181	4095	14.321
Ecad MO CO	Complete Overlap	h5b5	8.862	163.89	97.646	3332.81	14.321
Ecad MO CO	Complete Overlap	h5b5	8.862	152.912	95.247	1258.834	14.321
Ecad MO CO	Complete Overlap
Ecad MO CO	Complete Overlap	h5b6	10.321	132.55	97.972	311.791	16.693
Ecad MO CO	Complete Overlap	h5b6	10.321	133.263	98.799	290.464	16.693
Ecad MO CO	Complete Overlap	h5b6	10.321	138.595	97.104	365.922	16.693
Ecad MO CO	Complete Overlap	h5b6	10.321	139.07	96.456	311.743	16.693
Ecad MO CO	Complete Overlap	h5b6	10.321	138.526	99.132	327.896	16.693
Ecad MO CO	Complete Overlap	h5b6	10.321	137.884	98.93	303.538	16.693
Ecad MO CO	Complete Overlap
Ecad MO CO	Complete Overlap	h5b7	8.862	174.614	100.399	2632.923	14.321
Ecad MO CO	Complete Overlap	h5b7	8.862	160.811	98.032	1085.411	14.321
Ecad MO CO	Complete Overlap	h5b7	8.862	150.696	100.863	506.366	14.321
Ecad MO CO	Complete Overlap	h5b7	8.862	142.879	100.464	424.655	14.321
Ecad MO CO	Complete Overlap	h5b7	8.862	139.979	99.316	343.59	14.321
Ecad MO CO	Complete Overlap	h5b7	8.862	138.178	95.939	337.741	14.321
Ecad MO CO	Complete Overlap	h5b7	8.862	137.143	98.079	309.715	14.321
Ecad MO CO	Complete Overlap	h5b7	8.862	139.761	99.223	375.16	14.321
Ecad MO CO	Complete Overlap	h5b7	8.862	138.112	99.459	421.156	14.321
Ecad MO CO	Complete Overlap	h5b7	8.862	139.421	98.498	439.48	14.321
Ecad MO PO	Partial Overlap	h1b1	5.403	439.453	178.48	1529.346	8.698
Ecad MO PO	Partial Overlap	h1b1	5.403	336.225	156.212	1054.617	8.698
Ecad MO PO	Partial Overlap	h1b1	5.403	267.605	145.396	546.477	8.698
Ecad MO PO	Partial Overlap	h1b1	5.403	227.304	125.977	391.217	8.698
Ecad MO PO	Partial Overlap	h1b1	5.403	203.738	118.662	451.405	8.698
Ecad MO PO	Partial Overlap	h1b1	5.403	192.477	117.632	538.12	8.698
Ecad MO PO	Partial Overlap
Ecad MO PO	Partial Overlap	h1b2	7.619	585.11	155.919	2509.642	12.3
Ecad MO PO	Partial Overlap	h1b2	7.619	634.08	159.957	3001.65	12.3
Ecad MO PO	Partial Overlap	h1b2	7.619	624.028	174.19	2150.035	12.3
Ecad MO PO	Partial Overlap	h1b2	7.619	578.824	156.065	1854.675	12.3
Ecad MO PO	Partial Overlap	h1b2	7.619	508.726	171.576	1338.826	12.3
Ecad MO PO	Partial Overlap	h1b2	7.619	410.434	162.395	1392.692	12.3
Ecad MO PO	Partial Overlap	h1b2	7.619	333.281	141.086	1159.085	12.3
Ecad MO PO	Partial Overlap	h1b2	7.619	281.027	134.231	827.258	12.3
Ecad MO PO	Partial Overlap	h1b2	7.619	237.867	141.803	544.247	12.3
Ecad MO PO	Partial Overlap
Ecad MO PO	Partial Overlap	h1b3	11.185	402.406	141.003	1474.373	18.099
Ecad MO PO	Partial Overlap	h1b3	11.185	351.339	132.548	1373.227	18.099
Ecad MO PO	Partial Overlap	h1b3	11.185	306.873	149.174	1403.396	18.099
Ecad MO PO	Partial Overlap	h1b3	11.185	282.029	137.787	1385.772	18.099
Ecad MO PO	Partial Overlap	h1b3	11.185	249.29	123.383	1196.688	18.099
Ecad MO PO	Partial Overlap	h1b3	11.185	219.956	114.656	641.302	18.099
Ecad MO PO	Partial Overlap
Ecad MO PO	Partial Overlap	h1b4	7.511	509.378	142.02	1680.186	12.125
Ecad MO PO	Partial Overlap	h1b4	7.511	479.843	127.431	1356.82	12.125
Ecad MO PO	Partial Overlap	h1b4	7.511	442.27	145.229	964.983	12.125
Ecad MO PO	Partial Overlap	h1b4	7.511	387.805	140.327	1001.531	12.125
Ecad MO PO	Partial Overlap	h1b4	7.511	335.409	122.348	970.01	12.125
Ecad MO PO	Partial Overlap	h1b4	7.511	283.664	115.903	1110.243	12.125
Ecad MO PO	Partial Overlap	h1b4	7.511	239.743	97.541	1015.869	12.125
Ecad MO PO	Partial Overlap	h1b4	7.511	216.177	105.041	866.578	12.125
Ecad MO PO	Partial Overlap	h1b4	7.511	182.907	102.481	671.159	12.125
Ecad MO PO	Partial Overlap
Ecad MO PO	Partial Overlap	h1b5	7.078	514.26	185.418	1612.869	11.422
Ecad MO PO	Partial Overlap	h1b5	7.078	445.786	152.021	1082.899	11.422
Ecad MO PO	Partial Overlap	h1b5	7.078	331.796	156.013	881.277	11.422
Ecad MO PO	Partial Overlap	h1b5	7.078	257.039	128.507	569.363	11.422
Ecad MO PO	Partial Overlap	h1b5	7.078	212.037	114.762	553.966	11.422
Ecad MO PO	Partial Overlap	h1b5	7.078	181.454	118.589	301.713	11.422
Ecad MO PO	Partial Overlap	h2b1	9.402	881.421	296.627	2022.836	15.171
Ecad MO PO	Partial Overlap	h2b1	9.402	650.408	275.005	1428.411	15.171
Ecad MO PO	Partial Overlap	h2b1	9.402	433.401	178.72	1206.541	15.171
Ecad MO PO	Partial Overlap	h2b1	9.402	294.051	154.8	724.852	15.171
Ecad MO PO	Partial Overlap
Ecad MO PO	Partial Overlap	h2b2	10.483	726.237	180.994	1893.644	16.957
Ecad MO PO	Partial Overlap	h2b2	10.483	457.348	198.126	1016.836	16.957
Ecad MO PO	Partial Overlap	h2b2	10.483	328.966	152.876	1664.567	16.957
Ecad MO PO	Partial Overlap	h2b2	10.483	263.445	112.687	1492.146	16.957
Ecad MO PO	Partial Overlap
Ecad MO PO	Partial Overlap	h2b3	11.563	719.299	142.598	2782.37	18.714
Ecad MO PO	Partial Overlap	h2b3	11.563	513.992	162.938	1094.128	18.714
Ecad MO PO	Partial Overlap	h2b3	11.563	331.013	151.837	1125.377	18.714
Ecad MO PO	Partial Overlap	h2b3	11.563	273.168	124.363	1193.688	18.714
Ecad MO PO	Partial Overlap	h2b3	11.563	240.642	112.79	1417.869	18.714
Ecad MO PO	Partial Overlap	h3b1	13.671	298.637	105.358	1670.609	22.14
Ecad MO PO	Partial Overlap	h3b1	13.671	371.572	114.722	1855.516	22.14
Ecad MO PO	Partial Overlap	h3b1	13.671	436.096	112.221	1815.287	22.14
Ecad MO PO	Partial Overlap	h3b1	13.671	449.86	119.959	1923.378	22.14
Ecad MO PO	Partial Overlap	h3b1	13.671	414.485	126.547	3505.415	22.14
Ecad MO PO	Partial Overlap	h3b1	13.671	365.035	126.553	3577.828	22.14
Ecad MO PO	Partial Overlap	h3b1	13.671	302.613	112.96	1643.221	22.14
Ecad MO PO	Partial Overlap
Ecad MO PO	Partial Overlap	h3b2	8.7	824.439	243.081	2788.061	14.057
Ecad MO PO	Partial Overlap	h3b2	8.7	852.919	258.552	3195.227	14.057
Ecad MO PO	Partial Overlap	h3b2	8.7	739.478	263.287	2404.164	14.057
Ecad MO PO	Partial Overlap	h3b2	8.7	573.752	164.379	1822.071	14.057
Ecad MO PO	Partial Overlap	h3b2	8.7	426.658	169.906	1378.706	14.057
Ecad MO PO	Partial Overlap	h3b2	8.7	306.658	151.689	798.515	14.057
Ecad MO PO	Partial Overlap	h3b2	8.7	226.903	121.334	592.277	14.057
Ecad MO PO	Partial Overlap	h3b2	8.7	174.001	106.469	526.879	14.057
Ecad MO PO	Partial Overlap
Ecad MO PO	Partial Overlap	h3b3	10.807	756.386	174.433	3879.975	17.484
Ecad MO PO	Partial Overlap	h3b3	10.807	714.996	169.903	3664.274	17.484
Ecad MO PO	Partial Overlap	h3b3	10.375	630.119	159.591	2036.456	16.781
Ecad MO PO	Partial Overlap	h3b3	10.375	454.09	132.587	1787.099	16.781
Ecad MO PO	Partial Overlap	h3b3	10.375	317.925	118.656	1184.318	16.781
Ecad MO PO	Partial Overlap	h3b3	10.375	253.17	119.545	695.881	16.781
Ecad MO PO	Partial Overlap	h3b3	10.375	209.917	99.067	487.29	16.781
Ecad MO PO	Partial Overlap	h3b3	10.375	181.124	106.751	403.07	16.781
Ecad MO PO	Partial Overlap
Ecad MO PO	Partial Overlap	h3b4	8.97	533.037	212.998	2033.5	14.494
Ecad MO PO	Partial Overlap	h3b4	8.97	489.107	167.948	1803.465	14.494
Ecad MO PO	Partial Overlap	h3b4	8.97	397.522	152.008	1321.876	14.494
Ecad MO PO	Partial Overlap	h3b4	8.97	297.902	134.449	800.997	14.494
Ecad MO PO	Partial Overlap	h3b4	8.97	243.857	123.739	517.329	14.494
Ecad MO PO	Partial Overlap	h3b4	8.97	202.891	104.888	426.967	14.494
Ecad MO PO	Partial Overlap	h3b4	8.97	170.591	108.629	291.439	14.494
Ecad MO PO	Partial Overlap
Ecad MO PO	Partial Overlap	h3b4	3.89	743.39	216.152	3020.946	6.238
Ecad MO PO	Partial Overlap	h3b4	3.89	703.116	218.148	1993.536	6.238
Ecad MO PO	Partial Overlap	h3b4	3.89	558.053	214.241	1233.952	6.238
Ecad MO PO	Partial Overlap	h3b4	3.89	444.352	223.399	802.927	6.238
Ecad MO PO	Partial Overlap	h3b4	3.89	333.609	144.458	589.907	6.238
Ecad MO PO	Partial Overlap	h3b4	3.89	236.763	154.945	379.241	6.238
Ecad MO PO	Partial Overlap	h3b4	3.89	174.133	117.002	283.068	6.238
Ecad MO PO	Partial Overlap
Ecad MO PO	Partial Overlap	h3b5	7.727	801.663	192.648	2146.548	12.476
Ecad MO PO	Partial Overlap	h3b5	7.727	705.932	203.802	2309.795	12.476
Ecad MO PO	Partial Overlap	h3b5	7.727	525.463	214.068	2387.588	12.476
Ecad MO PO	Partial Overlap	h3b5	7.727	398.631	175.883	2189.983	12.476
Ecad MO PO	Partial Overlap	h3b5	7.727	315.019	143.65	1003.564	12.476
Ecad MO PO	Partial Overlap	h3b5	7.727	253.523	122.218	533.119	12.476
Ecad MO PO	Partial Overlap	h3b5	7.727	215.922	118.484	589.225	12.476
Ecad MO PO	Partial Overlap	h3b5	7.727	209.091	105.661	929.421	12.476
Ecad MO PO	Partial Overlap
Ecad MO PO	Partial Overlap	h4b1	12.158	252.42	105.649	1665.408	19.68
Ecad MO PO	Partial Overlap	h4b1	12.158	247.961	102.246	1238.447	19.68
Ecad MO PO	Partial Overlap	h4b1	12.158	228.994	97.229	1650.013	19.68
Ecad MO PO	Partial Overlap	h4b1	12.158	202.736	103.994	969.1	19.68
Ecad MO PO	Partial Overlap	h4b1	12.158	171.147	100.512	669.824	19.68
Ecad MO PO	Partial Overlap	h4b1	12.158	149.963	96.784	394.584	19.68
Ecad MO PO	Partial Overlap
Ecad MO PO	Partial Overlap	h4b2	10.104	365.689	133.562	4084.374	16.342
Ecad MO PO	Partial Overlap	h4b2	10.104	315.896	105.726	3994.01	16.342
Ecad MO PO	Partial Overlap	h4b2	10.104	250.729	109.136	1428.927	16.342
Ecad MO PO	Partial Overlap	h4b2	10.104	210.655	108.885	932.121	16.342
Ecad MO PO	Partial Overlap	h4b2	10.104	186.382	105.506	539.47	16.342
Ecad MO PO	Partial Overlap
Ecad MO PO	Partial Overlap	h4b3	15.508	251.412	108.331	1483.597	25.128
Ecad MO PO	Partial Overlap	h4b3	15.508	277.662	109.306	1887.589	25.128
Ecad MO PO	Partial Overlap	h4b3	15.508	285.544	110.446	2406.306	25.128
Ecad MO PO	Partial Overlap	h4b3	15.508	270.662	100.068	1444.093	25.128
Ecad MO PO	Partial Overlap	h4b3	15.508	243.588	106.908	976.769	25.128
Ecad MO PO	Partial Overlap	h4b3	15.508	212.76	103.762	887.708	25.128
Ecad MO PO	Partial Overlap	h5b1	4.701	184.954	100.452	900.373	7.556
Ecad MO PO	Partial Overlap	h5b1	4.701	184.993	100.066	623.543	7.556
Ecad MO PO	Partial Overlap	h5b1	4.701	177.432	101.171	520.114	7.556
Ecad MO PO	Partial Overlap	h5b1	4.701	168.806	100.374	624.347	7.556
Ecad MO PO	Partial Overlap	h5b1	4.701	160.987	91.311	710.467	7.556
Ecad MO PO	Partial Overlap	h5b1	4.701	148.881	100.511	573.736	7.556
Ecad MO PO	Partial Overlap	h5b1	4.701	140.519	94.974	302.661	7.556
Ecad MO PO	Partial Overlap
Ecad MO PO	Partial Overlap	h5b2	7.889	148.694	99.246	443.468	12.739
Ecad MO PO	Partial Overlap	h5b2	7.889	151.904	99.793	530.997	12.739
Ecad MO PO	Partial Overlap	h5b2	7.889	148.336	97.61	447.365	12.739
Ecad MO PO	Partial Overlap	h5b2	7.889	142.913	99.182	294.01	12.739
Ecad MO PO	Partial Overlap	h5b2	7.889	140.697	98.426	349.332	12.739
Ecad MO PO	Partial Overlap	h5b2	7.889	138.857	100.603	365.368	12.739
Ecad MO PO	Partial Overlap
Ecad MO PO	Partial Overlap	h5b3	10.104	232.261	105.597	689.239	16.342
Ecad MO PO	Partial Overlap	h5b3	10.104	224.509	105.325	837.212	16.342
Ecad MO PO	Partial Overlap	h5b3	10.104	215.412	104.732	869.439	16.342
Ecad MO PO	Partial Overlap	h5b3	10.104	200.71	101.78	921.266	16.342
Ecad MO PO	Partial Overlap	h5b3	10.104	175.493	96.978	488.631	16.342
Ecad MO PO	Partial Overlap	h5b3	10.104	163.732	99.952	378.702	16.342
Ecad MO PO	Partial Overlap
Ecad MO PO	Partial Overlap	h5b4	10.05	312.921	115.655	927.24	16.254
Ecad MO PO	Partial Overlap	h5b4	10.05	292.543	113.225	851.411	16.254
Ecad MO PO	Partial Overlap	h5b4	10.05	251.916	123.944	694.38	16.254
Ecad MO PO	Partial Overlap	h5b4	10.05	199.002	105.732	446.411	16.254
Ecad MO PO	Partial Overlap	h5b4	10.05	162.091	107.802	300.036	16.254
Ecad MO PO	Partial Overlap	h5b4	10.05	149.352	103.923	322.845	16.254
Ecad MO PO	Partial Overlap
Ecad MO PO	Partial Overlap	h5b5	4.053	351.08	139.385	1162.817	6.502
Ecad MO PO	Partial Overlap	h5b5	4.053	367.48	153.564	758.423	6.502
Ecad MO PO	Partial Overlap	h5b5	4.053	353.792	166.294	658.617	6.502
Ecad MO PO	Partial Overlap	h5b5	4.053	304.144	142.97	774.733	6.502
Ecad MO PO	Partial Overlap	h5b5	4.053	242.235	124.963	623.927	6.502
Ecad MO PO	Partial Overlap	h5b5	4.053	211.779	120.149	477.578	6.502
Ecad MO PO	Partial Overlap	h5b5	4.053	186.34	116.945	428.318	6.502
Ecad MO PO	Partial Overlap
Ecad MO PO	Partial Overlap	h5b6	6.268	165.084	103.789	450.234	10.104
Ecad MO PO	Partial Overlap	h5b6	6.268	155.253	101.054	320.564	10.104
Ecad MO PO	Partial Overlap	h5b6	6.268	143.768	94.693	309.684	10.104
Ecad MO PO	Partial Overlap	h5b6	6.268	135.885	101.208	280.04	10.104
Ecad MO PO	Partial Overlap	h5b6	6.268	130.401	97.916	214.041	10.104
Ecad MO NO	No Overlap	h1b1	10.861	599.332	204.753	1547.545	17.572
Ecad MO NO	No Overlap	h1b1	10.861	517.362	200.011	1440.36	17.572
Ecad MO NO	No Overlap	h1b1	10.861	398.732	154.729	1088.746	17.572
Ecad MO NO	No Overlap	h1b1	10.861	333.511	139.877	894.217	17.572
Ecad MO NO	No Overlap	h1b1	10.861	281.086	128.603	633.387	17.572
Ecad MO NO	No Overlap	h1b1	10.861	232.657	124.45	504.763	17.572
Ecad MO NO	No Overlap	h1b1	10.861	194.41	105.351	425.77	17.572
Ecad MO NO	No Overlap
Ecad MO NO	No Overlap	h1b2	6.646	628.255	170.716	2219.899	10.719
Ecad MO NO	No Overlap	h1b2	6.646	593.508	142.171	2211.046	10.719
Ecad MO NO	No Overlap	h1b2	6.646	553.17	155.736	2070.268	10.719
Ecad MO NO	No Overlap	h1b2	6.646	454.5	139.371	1543.738	10.719
Ecad MO NO	No Overlap	h1b2	6.646	343.894	158.107	860.103	10.719
Ecad MO NO	No Overlap	h1b2	6.646	293.227	138.255	739.92	10.719
Ecad MO NO	No Overlap	h1b2	6.646	266.514	134.492	807.316	10.719
Ecad MO NO	No Overlap
Ecad MO NO	No Overlap	h1b3	8.105	485.477	133.221	2123.206	13.084
Ecad MO NO	No Overlap	h1b3	8.105	462.87	138.968	2008.791	13.084
Ecad MO NO	No Overlap	h1b3	8.105	398.884	129.946	1250.585	13.084
Ecad MO NO	No Overlap	h1b3	8.105	364.897	132.875	1127.163	13.084
Ecad MO NO	No Overlap	h1b3	8.105	337.332	131.492	1165.162	13.084
Ecad MO NO	No Overlap
Ecad MO NO	No Overlap	h1b4	8.267	718.526	182.926	1765.522	13.354
Ecad MO NO	No Overlap	h1b4	8.267	660.972	207.308	1631.72	13.354
Ecad MO NO	No Overlap	h1b4	8.267	566.991	188.86	1345.524	13.354
Ecad MO NO	No Overlap	h1b4	8.267	459.482	188.47	1351.679	13.354
Ecad MO NO	No Overlap	h1b4	8.267	341.733	158.874	1386.551	13.354
Ecad MO NO	No Overlap	h1b4	8.267	263.251	123.883	1087.818	13.354
Ecad MO NO	No Overlap
Ecad MO NO	No Overlap	h1b5	8.591	705.354	186.169	1936.699	13.882
Ecad MO NO	No Overlap	h1b5	8.591	713.331	217.492	2009.868	13.882
Ecad MO NO	No Overlap	h1b5	8.591	709.554	213.962	2003.862	13.882
Ecad MO NO	No Overlap	h1b5	8.591	679.605	182.481	1978.64	13.882
Ecad MO NO	No Overlap	h1b5	8.591	594.575	196.188	1511.16	13.882
Ecad MO NO	No Overlap	h1b5	8.591	524.927	179.898	1265.907	13.882
Ecad MO NO	No Overlap	h1b5	8.591	447.293	178.377	1154.088	13.882
Ecad MO NO	No Overlap	h1b5	8.591	360.095	151.678	1030.968	13.882
Ecad MO NO	No Overlap	h1b5	8.591	281.535	133.985	876.982	13.882
Ecad MO NO	No Overlap
Ecad MO NO	No Overlap	h1b6	4.701	609.238	0	1386.228	7.556
Ecad MO NO	No Overlap	h1b6	4.701	607.392	0	1644.974	7.556
Ecad MO NO	No Overlap	h1b6	4.701	569.873	0	2117.439	7.556
Ecad MO NO	No Overlap	h2b1	12.104	866.487	306.636	3778.802	19.592
Ecad MO NO	No Overlap	h2b1	12.104	1006.048	369.372	3510.739	19.592
Ecad MO NO	No Overlap	h2b1	12.104	843.058	321.263	2769.895	19.592
Ecad MO NO	No Overlap	h2b1	12.104	556.321	225.799	4002.375	19.592
Ecad MO NO	No Overlap	h2b1	12.104	417.604	146.936	4095	19.592
Ecad MO NO	No Overlap	h2b1	12.104	302.199	134.019	1692.997	19.592
Ecad MO NO	No Overlap
Ecad MO NO	No Overlap	h2b2	9.51	1006.999	254.824	4093.911	15.375
Ecad MO NO	No Overlap	h2b2	9.51	971.052	240.256	3757.152	15.375
Ecad MO NO	No Overlap	h2b2	9.51	630.578	267.864	1926.784	15.375
Ecad MO NO	No Overlap	h2b2	9.51	352.776	152.246	1007.12	15.375
Ecad MO NO	No Overlap
Ecad MO NO	No Overlap	h2b3	12.158	757.682	182.224	3252.553	19.68
Ecad MO NO	No Overlap	h2b3	12.158	762.614	190.223	2594.421	19.68
Ecad MO NO	No Overlap	h2b3	12.158	637.954	198.121	2350.743	19.68
Ecad MO NO	No Overlap	h2b3	12.158	388.618	153.676	1444.468	19.68
Ecad MO NO	No Overlap	h2b3	12.158	251.698	127.609	653.181	19.68
Ecad MO NO	No Overlap
Ecad MO NO	No Overlap	h2b4	8.808	921.794	174.397	4087.167	14.233
Ecad MO NO	No Overlap	h2b4	8.808	829.293	211.625	2692.36	14.233
Ecad MO NO	No Overlap	h2b4	8.808	510.06	207.481	3072.19	14.233
Ecad MO NO	No Overlap	h2b4	8.808	329.885	134.265	1739.329	14.233
Ecad MO NO	No Overlap	h2b4	8.808	243.334	121.293	867.464	14.233
Ecad MO NO	No Overlap
Ecad MO NO	No Overlap	h2b5	7.295	703.519	260.496	1663.33	11.773
Ecad MO NO	No Overlap	h2b5	7.295	577.481	272.75	1373.212	11.773
Ecad MO NO	No Overlap	h2b5	7.295	484.218	201.093	1966.075	11.773
Ecad MO NO	No Overlap	h2b5	7.295	366.092	146.28	2339.541	11.773
Ecad MO NO	No Overlap
Ecad MO NO	No Overlap	h2b6	6.214	1041.802	250.801	4095	10.016
Ecad MO NO	No Overlap	h2b6	6.214	831.549	277.732	3639.612	10.016
Ecad MO NO	No Overlap	h2b6	6.214	465.054	199.208	849.333	10.016
Ecad MO NO	No Overlap	h2b6	6.214	300.172	151.105	617.678	10.016
Ecad MO NO	No Overlap	h3b1	9.024	709.49	207.335	1880.923	14.585
Ecad MO NO	No Overlap	h3b1	9.024	744.778	229.903	2033.364	14.585
Ecad MO NO	No Overlap	h3b1	9.024	709.974	222.406	2382.675	14.585
Ecad MO NO	No Overlap	h3b1	9.024	630.186	190.797	2418.14	14.585
Ecad MO NO	No Overlap	h3b1	9.024	516.847	206.518	2070.767	14.585
Ecad MO NO	No Overlap	h3b1	9.024	375.772	144.321	861.873	14.585
Ecad MO NO	No Overlap	h3b1	9.024	293.676	139.595	1245.248	14.585
Ecad MO NO	No Overlap	h3b1	9.024	263.431	134.332	1153.386	14.585
Ecad MO NO	No Overlap	h3b1	9.024	245.03	115.72	957.679	14.585
Ecad MO NO	No Overlap
Ecad MO NO	No Overlap	h3b2	9.888	597.794	168.348	2979.065	15.99
Ecad MO NO	No Overlap	h3b2	9.888	639.741	213.51	2083.944	15.99
Ecad MO NO	No Overlap	h3b2	9.888	623.085	205.537	1782.638	15.99
Ecad MO NO	No Overlap	h3b2	9.888	551.259	212.413	1505.506	15.99
Ecad MO NO	No Overlap	h3b2	9.888	455.401	184.17	1058.933	15.99
Ecad MO NO	No Overlap	h3b2	9.888	371.39	165.931	1226.854	15.99
Ecad MO NO	No Overlap	h3b2	9.888	318.299	147.294	1146.289	15.99
Ecad MO NO	No Overlap	h3b2	9.888	274.588	122.722	927.95	15.99
Ecad MO NO	No Overlap	h3b2	9.888	223.945	100.78	1051.901	15.99
Ecad MO NO	No Overlap
Ecad MO NO	No Overlap	h3b3	9.726	700.626	196.131	4095	15.727
Ecad MO NO	No Overlap	h3b3	9.726	693.509	193.842	4080.521	15.727
Ecad MO NO	No Overlap	h3b3	9.726	577.527	208.717	1767.23	15.727
Ecad MO NO	No Overlap	h3b3	9.726	443.783	185.142	1413.226	15.727
Ecad MO NO	No Overlap	h3b3	9.726	353.907	154.043	1334.049	15.727
Ecad MO NO	No Overlap	h3b3	9.726	287.985	129.15	875.72	15.727
Ecad MO NO	No Overlap
Ecad MO NO	No Overlap	h3b4	8.105	571.382	187.089	1419.036	13.084
Ecad MO NO	No Overlap	h3b4	8.105	444.361	189.776	1149.463	13.084
Ecad MO NO	No Overlap	h3b4	8.105	330.795	149.457	1108.373	13.084
Ecad MO NO	No Overlap	h3b4	8.105	259.675	136.882	798.959	13.084
Ecad MO NO	No Overlap	h3b4	8.105	208.712	113.814	420.997	13.084
Ecad MO NO	No Overlap	h3b4	8.105	172.315	111.036	358.45	13.084
Ecad MO NO	No Overlap	h3b4	8.105	154.232	105.126	365.583	13.084
Ecad MO NO	No Overlap	h4b1	15.4	335.276	107.855	2230.684	24.952
Ecad MO NO	No Overlap	h4b1	15.4	291.43	110.722	1489.672	24.952
Ecad MO NO	No Overlap	h4b1	15.4	246.87	109.802	708.737	24.952
Ecad MO NO	No Overlap	h4b1	15.4	215.123	111.404	1189.594	24.952
Ecad MO NO	No Overlap	h4b1	15.4	190.742	107.022	1990.496	24.952
Ecad MO NO	No Overlap	h4b1	15.4	171.321	99.239	2440.059	24.952
Ecad MO NO	No Overlap
Ecad MO NO	No Overlap	h4b2	10.753	335.901	99.195	2363.437	17.396
Ecad MO NO	No Overlap	h4b2	10.753	316.838	107.637	1034.129	17.396
Ecad MO NO	No Overlap	h4b2	10.753	270.203	108.94	918.398	17.396
Ecad MO NO	No Overlap	h4b2	10.753	219.723	106.01	781.86	17.396
Ecad MO NO	No Overlap	h4b2	10.753	184.982	103.627	536.235	17.396
Ecad MO NO	No Overlap
Ecad MO NO	No Overlap	h4b3	13.563	355.076	125.596	1698.795	21.965
Ecad MO NO	No Overlap	h4b3	13.563	369.036	122.994	2619.973	21.965
Ecad MO NO	No Overlap	h4b3	13.563	367.033	142.178	3834.606	21.965
Ecad MO NO	No Overlap	h4b3	13.563	341.095	130.589	3954.771	21.965
Ecad MO NO	No Overlap	h4b3	13.563	294.452	122.229	2602.118	21.965
Ecad MO NO	No Overlap
Ecad MO NO	No Overlap	h4b4	12.644	326.868	116.991	1382.969	20.471
Ecad MO NO	No Overlap	h4b4	12.644	292.373	124.114	1309.384	20.471
Ecad MO NO	No Overlap	h4b4	12.644	227.625	110.101	977.475	20.471
Ecad MO NO	No Overlap	h4b4	12.644	181.52	106.842	656.165	20.471
Ecad MO NO	No Overlap	h5b1	7.078	277.373	115.147	891.314	11.422
Ecad MO NO	No Overlap	h5b1	7.078	278.472	106.805	1312.949	11.422
Ecad MO NO	No Overlap	h5b1	7.078	266.807	112.913	1405.387	11.422
Ecad MO NO	No Overlap	h5b1	7.078	222.755	112.461	1005.786	11.422
Ecad MO NO	No Overlap	h5b1	7.078	187.356	108.289	461.584	11.422
Ecad MO NO	No Overlap	h5b1	7.078	175.676	111.764	423.834	11.422
Ecad MO NO	No Overlap
Ecad MO NO	No Overlap	h5b2	9.618	178.252	104.696	409.764	15.551
Ecad MO NO	No Overlap	h5b2	9.618	172.783	100.324	438.595	15.551
Ecad MO NO	No Overlap	h5b2	9.618	167.829	100.812	473.531	15.551
Ecad MO NO	No Overlap	h5b2	9.618	162.306	100.987	493.713	15.551
Ecad MO NO	No Overlap	h5b2	9.618	157.074	99.229	624.842	15.551
Ecad MO NO	No Overlap	h5b2	9.618	150.914	97.793	1181.634	15.551
Ecad MO NO	No Overlap
Ecad MO NO	No Overlap	h5b3	7.403	214.13	112.594	539.548	11.902
Ecad MO NO	No Overlap	h5b3	7.403	214.688	108.863	566.675	11.902
Ecad MO NO	No Overlap	h5b3	7.403	211.515	107.23	454.196	11.902
Ecad MO NO	No Overlap	h5b3	7.403	206.069	114.056	489.259	11.902
Ecad MO NO	No Overlap	h5b3	7.403	199.46	112.571	735.158	11.902
Ecad MO NO	No Overlap	h5b3	7.403	188.5	105.271	803.681	11.902
Ecad MO NO	No Overlap	h5b3	7.403	176.898	101.027	489.457	11.902
Ecad MO NO	No Overlap
Ecad MO NO	No Overlap	h5b4	11.833	414.821	116.096	2634.381	19.153
Ecad MO NO	No Overlap	h5b4	11.833	414.243	109.353	2025.894	19.153
Ecad MO NO	No Overlap	h5b4	11.833	389.368	112.476	1396.754	19.153
Ecad MO NO	No Overlap	h5b4	11.833	351.602	106.581	1572.739	19.153
Ecad MO NO	No Overlap	h5b4	11.833	284.893	102.689	1410.391	19.153
Ecad MO NO	No Overlap	h5b4	11.833	223.597	105.328	745.853	19.153
Ecad MO NO	No Overlap	h5b4	11.833	191.586	104.963	585.483	19.153
Ecad MO NO	No Overlap
Ecad MO NO	No Overlap	h5b5	6.484	428.291	123.264	1210.573	10.455
Ecad MO NO	No Overlap	h5b5	6.484	420.708	134.643	1213.175	10.455
Ecad MO NO	No Overlap	h5b5	6.484	387.401	141.216	1334.4	10.455
Ecad MO NO	No Overlap	h5b5	6.484	370.471	137.984	1064.378	10.455
Ecad MO NO	No Overlap	h5b5	6.484	342.336	127.344	1006.432	10.455
Ecad MO NO	No Overlap	h5b5	6.484	307.694	131.718	955.799	10.455
Ecad MO NO	No Overlap	h5b5	6.484	282.114	101.493	904.888	10.455
Ecad MO NO	No Overlap	h5b5	6.484	258.471	108.486	934.236	10.455
Ecad MO NO	No Overlap
Ecad MO NO	No Overlap	h5b6	7.024	393.966	121.435	1759.69	11.334
Ecad MO NO	No Overlap	h5b6	7.024	330.559	110.096	980.662	11.334
Ecad MO NO	No Overlap	h5b6	7.024	293.08	121.944	978.337	11.334
Ecad MO NO	No Overlap	h5b6	7.024	261.81	119.553	881.516	11.334
Ecad MO NO	No Overlap	h5b6	7.024	235.623	112.306	1005.819	11.334
Ecad MO NO	No Overlap	h5b6	7.024	213.985	108.846	883.861	11.334
Ecad MO NO	No Overlap	h5b6	7.024	189.566	102.381	772.804	11.334
Ecad MO NO	No Overlap
Ecad MO NO	No Overlap	h5b7	9.888	321.762	125.077	1573.447	15.99
Ecad MO NO	No Overlap	h5b7	9.888	317.834	117.912	1703.146	15.99
Ecad MO NO	No Overlap	h5b7	9.888	294.771	114.316	1319.339	15.99
Ecad MO NO	No Overlap	h5b7	9.888	258.256	107.161	1143.089	15.99
Ecad MO NO	No Overlap	h5b7	9.888	212.755	102.558	630.044	15.99
Ecad MO NO	No Overlap	h5b7	9.888	184.218	108.126	505.427	15.99
Ecad MO NO	No Overlap	h5b7	9.888	153.65	102.717	411.838	15.99
Ecad MO CO	Complete Overlap	h3b2	5.511	311.403	154.91	1040.752	8.874
Ecad MO CO	Complete Overlap	h3b2	5.511	278.719	132.882	723.149	8.874
Ecad MO CO	Complete Overlap	h3b2	5.511	267.108	131.6	948.969	8.874
Ecad MO CO	Complete Overlap	h3b2	5.511	249.687	126.296	1165.032	8.874
Ecad MO CO	Complete Overlap
Ecad MO CO	Complete Overlap	h3b3	9.834	328.369	120.986	1600.313	15.902
Ecad MO CO	Complete Overlap	h3b3	9.834	319.058	124.614	2625.086	15.902
Ecad MO CO	Complete Overlap	h3b3	9.834	319.229	108.237	3876.882	15.902
Ecad MO CO	Complete Overlap	h3b3	9.834	277.345	113.978	3895.932	15.902
Ecad MO CO	Complete Overlap	h3b3	9.834	217.141	116.344	1764.978	15.902
Ecad MO CO	Complete Overlap	h3b3	9.834	182.308	109.671	697.824	15.902
Ecad MO CO	Complete Overlap
Ecad MO CO	Complete Overlap	h3b4	7.997	289.216	125.209	777.686	12.915
Ecad MO CO	Complete Overlap	h3b4	7.997	263.771	123.662	1096.694	12.915
Ecad MO CO	Complete Overlap	h3b4	7.997	243.66	110.804	1492.22	12.915
Ecad MO CO	Complete Overlap	h3b4	7.997	229.692	104.775	2238.926	12.915
Ecad MO CO	Complete Overlap	h3b4	7.997	207.802	101.686	1577.318	12.915
Ecad MO CO	Complete Overlap
Ecad MO CO	Complete Overlap	h3b5	8.267	359.903	131.794	1349.341	13.355
Ecad MO CO	Complete Overlap	h3b5	8.267	317.615	130.92	1836.109	13.355
Ecad MO CO	Complete Overlap	h3b5	8.267	264.906	119.359	1113.413	13.355
Ecad MO CO	Complete Overlap	h3b5	8.267	216.201	116.955	694.526	13.355
Ecad MO CO	Complete Overlap
Ecad MO CO	Complete Overlap	h4b1	4.215	588.898	183.532	3716.107	6.762
Ecad MO CO	Complete Overlap	h4b1	4.215	490.958	182.465	1145.934	6.762
Ecad MO CO	Complete Overlap	h4b1	4.215	394.79	168.824	969.027	6.762
Ecad MO CO	Complete Overlap	h4b1	4.215	304.068	132.352	572.367	6.762
Ecad MO CO	Complete Overlap	h4b1	4.215	244.091	128.818	543.198	6.762
Ecad MO CO	Complete Overlap
Ecad MO CO	Complete Overlap	h4b2	3.674	590.978	232.64	4081.588	5.887
Ecad MO CO	Complete Overlap	h4b2	3.674	393.66	190.672	1101.981	5.887
Ecad MO CO	Complete Overlap	h4b2	3.674	294.194	171.866	520.017	5.887
Ecad MO CO	Complete Overlap	h4b2	3.674	227.888	134.298	395.691	5.887
Ecad MO CO	Complete Overlap	h4b2	3.674	186.359	120.85	342.366	5.887
Ecad MO CO	Complete Overlap
Ecad MO CO	Complete Overlap	h4b3	9.186	541.387	134.363	1949.541	14.848
Ecad MO CO	Complete Overlap	h4b3	9.186	468.149	139.448	2590.495	14.848
Ecad MO CO	Complete Overlap	h4b3	9.186	406.44	148.485	2171.642	14.848
Ecad MO CO	Complete Overlap	h4b3	9.186	327.669	130.738	958.046	14.848
Ecad MO CO	Complete Overlap	h4b3	9.186	271.288	129.368	747.26	14.848
Ecad MO CO	Complete Overlap	h4b3	9.186	259.569	113.07	834.559	14.848
Ecad MO CO	Complete Overlap
Ecad MO CO	Complete Overlap	h4b4	6.484	590.727	151.231	4091.101	10.455
Ecad MO CO	Complete Overlap	h4b4	6.484	661.641	176.456	3282.144	10.455
Ecad MO CO	Complete Overlap	h4b4	6.484	569.595	190.302	2496.952	10.455
Ecad MO CO	Complete Overlap	h4b4	6.484	452.202	179.602	1233.751	10.455
Ecad MO CO	Complete Overlap	h4b4	6.484	393.674	153.244	1520.197	10.455
Ecad MO CO	Complete Overlap	h4b4	6.484	350.352	129.327	2161.797	10.455
Ecad MO CO	Complete Overlap
Ecad MO CO	Complete Overlap	h4b5	10.375	576.044	151.813	3562.304	16.781
Ecad MO CO	Complete Overlap	h4b5	10.375	508.55	155.526	3009.641	16.781
Ecad MO CO	Complete Overlap	h4b5	10.375	413.875	138.049	1422.128	16.781
Ecad MO CO	Complete Overlap	h4b5	10.375	336.415	128.391	2205.696	16.781
Ecad MO CO	Complete Overlap	h4b5	10.375	295.939	114.552	3774.136	16.781
Ecad MO CO	Complete Overlap
Ecad MO CO	Complete Overlap	h4b6	5.349	528.113	148.887	3586.203	8.61
Ecad MO CO	Complete Overlap	h4b6	5.349	520.396	201.761	3175.892	8.61
Ecad MO CO	Complete Overlap	h4b6	5.349	483.772	198.91	1497.701	8.61
Ecad MO CO	Complete Overlap	h4b6	5.349	429.958	193.978	1258.799	8.61
Ecad MO CO	Complete Overlap	h4b6	5.349	379.541	174.979	1298.817	8.61
Ecad MO CO	Complete Overlap
Ecad MO CO	Complete Overlap	h4b7	5.187	452.511	136.354	1274.251	8.347
Ecad MO CO	Complete Overlap	h4b7	5.187	425.503	176.756	1166.948	8.347
Ecad MO CO	Complete Overlap	h4b7	5.187	372.011	146.687	1268.97	8.347
Ecad MO CO	Complete Overlap	h4b7	5.187	323.049	137.263	1384.878	8.347
Ecad MO CO	Complete Overlap	h4b7	5.187	269.249	125.562	754.76	8.347
Ecad MO CO	Complete Overlap	h4b7	5.187	217.015	110.176	574.794	8.347
Ecad MO CO	Complete Overlap	h4b7	5.187	186.837	112.183	544.334	8.347
Ecad MO CO	Complete Overlap
Ecad MO CO	Complete Overlap	h4b8	8.267	396.311	168.223	1404.023	13.312
Ecad MO CO	Complete Overlap	h4b8	8.267	371.225	169.976	1521.681	13.312
Ecad MO CO	Complete Overlap	h4b8	8.267	343.328	155.132	1963.344	13.312
Ecad MO CO	Complete Overlap	h4b8	8.267	319.789	131.919	1536.579	13.312
Ecad MO CO	Complete Overlap	h4b8	8.267	286.483	123.447	1339.466	13.312
Ecad MO CO	Complete Overlap	h4b8	8.267	253.123	106.672	1063.558	13.312
Ecad MO CO	Complete Overlap	h4b8	8.267	220.82	104.147	1541.924	13.312
Ecad MO CO	Complete Overlap
Ecad MO CO	Complete Overlap	h4b9	9.618	443.42	164.804	1590.331	15.488
Ecad MO CO	Complete Overlap	h4b9	9.618	395.667	135.495	1234.209	15.488
Ecad MO CO	Complete Overlap	h4b9	9.618	336.831	118.597	1586.576	15.488
Ecad MO CO	Complete Overlap	h4b9	9.618	306.344	110.496	3214.288	15.488
Ecad MO CO	Complete Overlap	h4b9	9.618	293.227	105.105	3612.651	15.488
Ecad MO CO	Complete Overlap	h4b9	9.618	281.366	108.194	2951.776	15.488
Ecad MO CO	Complete Overlap	h4b9	9.618	250.592	98.148	1253.076	15.488
Ecad MO CO	Complete Overlap
Ecad MO CO	Complete Overlap	h4b10	6.106	506.111	134.571	1858.061	9.827
Ecad MO CO	Complete Overlap	h4b10	6.106	452.464	164.207	1687.079	9.827
Ecad MO CO	Complete Overlap	h4b10	6.106	379.257	137.086	1166.922	9.827
Ecad MO CO	Complete Overlap	h4b10	6.106	287.057	128.197	853.303	9.827
Ecad MO CO	Complete Overlap	h4b10	6.106	236.87	123.848	975.06	9.827
Ecad MO CO	Complete Overlap	h4b10	6.106	204.44	115.881	1157.305	9.827
Ecad MO CO	Complete Overlap
Ecad MO CO	Complete Overlap	h4b11	9.402	413.2	170.909	1125.236	15.199
Ecad MO CO	Complete Overlap	h4b11	9.402	397.236	152.44	1449.658	15.199
Ecad MO CO	Complete Overlap	h4b11	9.402	368.521	147.664	1709.833	15.199
Ecad MO CO	Complete Overlap	h4b11	9.402	333.666	132.86	1217.471	15.199
Ecad MO CO	Complete Overlap	h4b11	9.402	281.384	108.041	1073.346	15.199
Ecad MO CO	Complete Overlap	h4b11	9.402	235.274	107.245	830.026	15.199
Ecad MO CO	Complete Overlap	h4b11	9.402	202.771	100.715	679.525	15.199
Ecad MO CO	Complete Overlap	h5b1	9.186	385.479	118.901	4095	14.848
Ecad MO CO	Complete Overlap	h5b1	9.186	385.479	118.901	4095	14.848
Ecad MO CO	Complete Overlap	h5b1	9.186	349.551	128.387	4059.476	14.848
Ecad MO CO	Complete Overlap	h5b1	9.186	245.548	123.905	821.186	14.848
Ecad MO CO	Complete Overlap	h5b1	11.023	322.488	124.212	1394.417	17.835
Ecad MO CO	Complete Overlap	h5b1	11.023	277.048	119.412	1976.089	17.835
Ecad MO CO	Complete Overlap	h5b1	11.023	237.723	118.422	1261.49	17.835
Ecad MO CO	Complete Overlap	h5b1	11.023	200.174	111.529	465.9	17.835
Ecad MO CO	Complete Overlap	h5b1	11.023	185.657	113.579	397.057	17.835
Ecad MO CO	Complete Overlap	h5b1	11.023	179.563	102.072	351.677	17.835
Ecad MO CO	Complete Overlap
Ecad MO CO	Complete Overlap	h5b2	11.509	301.878	103.946	1472.305	18.624
Ecad MO CO	Complete Overlap	h5b2	11.509	317.066	113.037	2487.425	18.624
Ecad MO CO	Complete Overlap	h5b2	10.321	329.433	131.15	2793.404	16.693
Ecad MO CO	Complete Overlap	h5b2	10.321	336.076	116.625	1294.096	16.693
Ecad MO CO	Complete Overlap	h5b2	10.321	320.877	115.493	1407.987	16.693
Ecad MO CO	Complete Overlap	h5b2	10.321	281.17	132.889	1099.692	16.693
Ecad MO CO	Complete Overlap	h5b2	10.321	235.236	118.498	667.32	16.693
Ecad MO CO	Complete Overlap	h5b2	10.321	217.127	120.146	729.3	16.693
Ecad MO CO	Complete Overlap
Ecad MO CO	Complete Overlap	h5b3	11.779	302.747	124.058	1703.376	19.065
Ecad MO CO	Complete Overlap	h5b3	11.779	317.715	128.864	3266.202	19.065
Ecad MO CO	Complete Overlap	h5b3	11.779	306.805	127.161	2903.224	19.065
Ecad MO CO	Complete Overlap	h5b3	11.779	281.166	116.718	1531.764	19.065
Ecad MO CO	Complete Overlap	h5b3	11.779	228.847	115.482	927.582	19.065
Ecad MO CO	Complete Overlap	h5b3	11.779	203.691	114.794	686.84	19.065
Ecad MO CO	Complete Overlap	h5b3	11.779	192.543	107.108	811.09	19.065
Ecad MO CO	Complete Overlap
Ecad MO CO	Complete Overlap	h6b1	12.32	230.502	94.675	1268.417	19.944
Ecad MO CO	Complete Overlap	h6b1	12.32	232.347	102.283	934.662	19.944
Ecad MO CO	Complete Overlap	h6b1	12.32	214.467	101.721	933.166	19.944
Ecad MO CO	Complete Overlap	h6b1	12.32	176.846	104.191	846.088	19.944
Ecad MO CO	Complete Overlap	h6b1	12.32	152.911	101.942	414.712	19.944
Ecad MO CO	Complete Overlap	h6b1	12.32	139.061	98.602	291.213	19.944
Ecad MO CO	Complete Overlap
Ecad MO CO	Complete Overlap	h6b2	10.537	212.534	105.016	2122.092	17.045
Ecad MO CO	Complete Overlap	h6b2	10.537	234.458	101.555	2727.979	17.045
Ecad MO CO	Complete Overlap	h6b2	10.537	225.614	105.4	2738.242	17.045
Ecad MO CO	Complete Overlap	h6b2	10.537	197.428	97.082	630.31	17.045
Ecad MO CO	Complete Overlap	h6b2	10.537	189.264	98.604	846.082	17.045
Ecad MO CO	Complete Overlap	h6b2	10.537	180.597	101.263	1152.607	17.045
Ecad MO CO	Complete Overlap	h6b2	10.537	166.954	100.082	717.071	17.045
Ecad MO CO	Complete Overlap
Ecad MO CO	Complete Overlap	h6b3	12.104	180.377	98.462	1265.939	19.592
Ecad MO CO	Complete Overlap	h6b3	12.104	204.001	102.132	1930.206	19.592
Ecad MO CO	Complete Overlap	h6b3	12.104	203.921	103.908	1428.47	19.592
Ecad MO CO	Complete Overlap	h6b3	12.104	196.083	102.627	1442.004	19.592
Ecad MO CO	Complete Overlap	h6b3	12.104	193.633	107.902	765.587	19.592
Ecad MO CO	Complete Overlap	h6b3	12.104	191.314	109.355	1143.271	19.592
Ecad MO CO	Complete Overlap	h7b1	7.997	325.054	134.059	795.28	12.915
Ecad MO CO	Complete Overlap	h7b1	7.997	249.82	130.675	488.701	12.915
Ecad MO CO	Complete Overlap	h7b1	7.997	219.737	130.478	464.158	12.915
Ecad MO CO	Complete Overlap	h7b1	7.997	195.934	116.732	381.74	12.915
Ecad MO CO	Complete Overlap	h7b1	7.997	171.629	110.448	304.057	12.915
Ecad MO CO	Complete Overlap	h7b1	7.997	158.837	107.306	308.14	12.915
Ecad MO CO	Complete Overlap
Ecad MO CO	Complete Overlap	h7b2	8.267	520.779	162.983	2436.309	13.354
Ecad MO CO	Complete Overlap	h7b2	8.267	510.744	147.659	4002.668	13.354
Ecad MO CO	Complete Overlap	h7b2	8.267	459.895	141.368	4089.669	13.354
Ecad MO CO	Complete Overlap	h7b2	8.267	373.953	130.92	2520.98	13.354
Ecad MO CO	Complete Overlap	h7b2	8.267	328.059	116.257	2572.532	13.354
Ecad MO CO	Complete Overlap	h7b2	8.267	288.295	112.657	2943.248	13.354
Ecad MO CO	Complete Overlap	h7b2	8.267	248.347	113.653	2812.659	13.354
Ecad MO CO	Complete Overlap
Ecad MO CO	Complete Overlap	h7b3	7.024	580.692	180.515	3557.235	11.334
Ecad MO CO	Complete Overlap	h7b3	7.024	525.351	189.2	1983.341	11.334
Ecad MO CO	Complete Overlap	h7b3	7.024	466.227	188.584	2260.431	11.334
Ecad MO CO	Complete Overlap	h7b3	7.024	434.732	155.266	2403.198	11.334
Ecad MO CO	Complete Overlap	h7b3	7.024	387.389	153.559	1831.783	11.334
Ecad MO CO	Complete Overlap	h7b3	7.024	340.713	155.463	1779.79	11.334
Ecad MO CO	Complete Overlap	h7b3	7.024	303.534	133.285	751.954	11.334
Ecad MO CO	Complete Overlap
Ecad MO CO	Complete Overlap	h7b4	5.998	431.249	166.92	2175.941	9.664
Ecad MO CO	Complete Overlap	h7b4	5.998	421.813	148.779	1917.35	9.664
Ecad MO CO	Complete Overlap	h7b4	5.998	394.141	171.363	1787.87	9.664
Ecad MO CO	Complete Overlap	h7b4	5.998	354.867	161.253	1064.398	9.664
Ecad MO CO	Complete Overlap	h7b4	5.998	307.865	146.221	801.136	9.664
Ecad MO CO	Complete Overlap	h7b4	5.998	266.177	126.151	775.425	9.664
Ecad MO CO	Complete Overlap	h7b4	5.998	231.115	122.104	596.876	9.664
Ecad MO CO	Complete Overlap	h7b4	5.998	211.598	119.678	558.04	9.664
Ecad MO CO	Complete Overlap	h8b1	6.646	275.867	134.716	774.914	10.719
Ecad MO CO	Complete Overlap	h8b1	6.646	242.868	135.191	603.885	10.719
Ecad MO CO	Complete Overlap	h8b1	6.646	227.99	107.444	585.058	10.719
Ecad MO CO	Complete Overlap	h8b1	6.646	214.937	110.916	565.616	10.719
Ecad MO CO	Complete Overlap	h8b1	6.646	197.37	109.344	441.654	10.719
Ecad MO CO	Complete Overlap	h8b1	6.646	169.109	105.348	373.323	10.719
Ecad MO CO	Complete Overlap
Ecad MO CO	Complete Overlap	h8b2	5.728	243.583	102.271	695.271	9.225
Ecad MO CO	Complete Overlap	h8b2	5.728	225.658	111.392	487.67	9.225
Ecad MO CO	Complete Overlap	h8b2	5.728	185.321	114.907	477.751	9.225
Ecad MO CO	Complete Overlap	h8b2	5.728	161.323	103.588	278.694	9.225
Ecad MO CO	Complete Overlap	h8b2	5.728	145.119	100.469	248.428	9.225
Ecad MO CO	Complete Overlap
Ecad MO CO	Complete Overlap	h8b3	5.403	304.734	116.833	4091.456	8.698
Ecad MO CO	Complete Overlap	h8b3	5.403	242.446	113.791	1220.98	8.698
Ecad MO CO	Complete Overlap	h8b3	5.403	200.606	102.878	841.317	8.698
Ecad MO CO	Complete Overlap	h8b3	5.403	169.932	95.997	406.653	8.698
Ecad MO CO	Complete Overlap	h8b3	5.403	155.414	104.277	348.403	8.698
Ecad MO CO	Complete Overlap
Ecad MO CO	Complete Overlap	h8b4	6.646	209.195	105.319	700.497	10.719
Ecad MO CO	Complete Overlap	h8b4	6.646	203.506	110.629	655.804	10.719
Ecad MO CO	Complete Overlap	h8b4	6.646	193.631	105.789	583.985	10.719
Ecad MO CO	Complete Overlap	h8b4	6.646	175.716	104.344	591.224	10.719
Ecad MO CO	Complete Overlap	h8b4	6.646	165.373	99.942	1044.42	10.719
Ecad MO CO	Complete Overlap
Ecad MO CO	Complete Overlap	h8b5	9.564	237.719	119.621	733.13	15.463
Ecad MO CO	Complete Overlap	h8b5	9.564	210.514	111.161	498.06	15.463
Ecad MO CO	Complete Overlap	h8b5	9.564	204.819	103.58	647.46	15.463
Ecad MO CO	Complete Overlap	h8b5	9.564	206.186	97.684	706.949	15.463
Ecad MO CO	Complete Overlap	h8b5	9.564	196.203	100.027	596.851	15.463
Ecad MO CO	Complete Overlap
Ecad MO CO	Complete Overlap	h8b6	6.538	290.589	123.249	1013.604	10.543
Ecad MO CO	Complete Overlap	h8b6	6.538	262.704	123.525	640.44	10.543
Ecad MO CO	Complete Overlap	h8b6	6.538	222.744	117.463	726.727	10.543
Ecad MO CO	Complete Overlap	h8b6	6.538	200.054	114.721	500.22	10.543
Ecad MO CO	Complete Overlap	h8b6	6.538	180.583	107.269	340.125	10.543
Ecad MO CO	Complete Overlap
Ecad MO CO	Complete Overlap	h8b7	10.645	377.687	139.287	1439.204	17.22
Ecad MO CO	Complete Overlap	h8b7	10.645	363.228	139.644	1438.658	17.22
Ecad MO CO	Complete Overlap	h8b7	10.645	276.517	114.839	770.886	17.22
Ecad MO CO	Complete Overlap	h8b7	10.645	195.448	110.246	357.962	17.22
Ecad MO CO	Complete Overlap	h8b7	10.645	169.358	107.244	333.656	17.22
Ecad MO PO	Partial Overlap	h1b1	12.104	476.266	110.441	3969.673	19.593
Ecad MO PO	Partial Overlap	h1b1	12.158	465.132	109.754	2082.216	19.68
Ecad MO PO	Partial Overlap	h1b1	12.158	392.835	105.756	1444.804	19.68
Ecad MO PO	Partial Overlap	h1b1	12.158	317.562	99.049	1287.156	19.68
Ecad MO PO	Partial Overlap	h1b1	12.158	245.269	102.821	1199.11	19.68
Ecad MO PO	Partial Overlap	h1b1	12.158	204.149	100.525	766.989	19.68
Ecad MO PO	Partial Overlap	h1b1	12.158	183.016	104.138	657.198	19.68
Ecad MO PO	Partial Overlap
Ecad MO PO	Partial Overlap	h1b2	8.97	463.723	137.918	1955.135	14.497
Ecad MO PO	Partial Overlap	h1b2	8.97	484.003	141.52	2536.046	14.497
Ecad MO PO	Partial Overlap	h1b2	8.97	425.622	160.76	2640.093	14.497
Ecad MO PO	Partial Overlap	h1b2	8.97	367.066	146.604	1776.357	14.497
Ecad MO PO	Partial Overlap	h1b2	8.97	280.627	128.619	809.112	14.497
Ecad MO PO	Partial Overlap
Ecad MO PO	Partial Overlap	h1b3	16.48	448.623	112.001	2110.59	26.709
Ecad MO PO	Partial Overlap	h1b3	16.48	423.417	118.917	1668.646	26.709
Ecad MO PO	Partial Overlap	h1b3	16.48	380.36	111.406	1358.577	26.709
Ecad MO PO	Partial Overlap	h1b3	18.318	427.837	142.507	3357.801	29.696
Ecad MO PO	Partial Overlap	h1b3	18.318	412.609	122.63	3021.832	29.696
Ecad MO PO	Partial Overlap	h1b3	18.318	374.222	120.815	1567.797	29.696
Ecad MO PO	Partial Overlap	h1b3	18.318	328.827	114.853	1751.134	29.696
Ecad MO PO	Partial Overlap	h1b3	18.318	289.783	105.758	1993.77	29.696
Ecad MO PO	Partial Overlap
Ecad MO PO	Partial Overlap	h1b4	13.995	452.396	136.878	2969.585	22.668
Ecad MO PO	Partial Overlap	h1b4	13.995	461.211	100.431	2153.09	22.668
Ecad MO PO	Partial Overlap	h1b4	13.995	454.075	120.209	2500.67	22.668
Ecad MO PO	Partial Overlap	h1b4	13.995	429.954	113.782	4045.44	22.668
Ecad MO PO	Partial Overlap	h1b4	13.995	382.783	101.651	4095	22.668
Ecad MO PO	Partial Overlap	h1b4	13.995	310.004	94.294	3751.957	22.668
Ecad MO PO	Partial Overlap	h1b4	13.995	246.044	97.382	1247.848	22.668
Ecad MO PO	Partial Overlap
Ecad MO PO	Partial Overlap	h1b5	8.916	364.571	116.787	1624.141	14.409
Ecad MO PO	Partial Overlap	h1b5	8.916	384.333	110.96	2256.178	14.409
Ecad MO PO	Partial Overlap	h1b5	8.916	401.1	134.003	2503.224	14.409
Ecad MO PO	Partial Overlap	h1b5	8.916	375.628	125.347	1313.717	14.409
Ecad MO PO	Partial Overlap	h1b5	8.916	337.342	131.84	1282.242	14.409
Ecad MO PO	Partial Overlap	h1b5	8.916	311.701	124.436	1257.709	14.409
Ecad MO PO	Partial Overlap	h1b5	8.916	279.69	116.145	1213.775	14.409
Ecad MO PO	Partial Overlap
Ecad MO PO	Partial Overlap
Ecad MO PO	Partial Overlap	h2b1	6.97	330.407	109.737	4095	11.246
Ecad MO PO	Partial Overlap	h2b1	6.97	341.495	120.822	3331.917	11.246
Ecad MO PO	Partial Overlap	h2b1	6.97	291.867	114.368	930.451	11.246
Ecad MO PO	Partial Overlap	h2b1	6.97	238.709	123.879	631.19	11.246
Ecad MO PO	Partial Overlap	h2b1	6.97	199.347	110.003	644.718	11.246
Ecad MO PO	Partial Overlap
Ecad MO PO	Partial Overlap	h2b2	11.779	426.957	120.478	2277.968	19.06
Ecad MO PO	Partial Overlap	h2b2	11.779	406.699	150.098	1060.113	19.06
Ecad MO PO	Partial Overlap	h2b2	11.779	351.008	148.787	813.245	19.06
Ecad MO PO	Partial Overlap	h2b2	11.779	309.416	118.035	911.713	19.06
Ecad MO PO	Partial Overlap	h2b2	11.779	291.676	128.35	1038.248	19.06
Ecad MO PO	Partial Overlap	h2b2	11.779	289.143	121.902	1179.733	19.06
Ecad MO PO	Partial Overlap
Ecad MO PO	Partial Overlap	h2b3	6.16	390.689	128.002	1314.99	9.928
Ecad MO PO	Partial Overlap	h2b3	6.16	391.895	124.994	1686.53	9.928
Ecad MO PO	Partial Overlap	h2b3	6.16	379.872	138.968	1807.912	9.928
Ecad MO PO	Partial Overlap	h2b3	6.16	351.624	127.989	2786.094	9.928
Ecad MO PO	Partial Overlap	h2b3	6.16	313.841	129.033	2199.95	9.928
Ecad MO PO	Partial Overlap	h2b3	6.16	285.199	120.978	1147.871	9.928
Ecad MO PO	Partial Overlap
Ecad MO PO	Partial Overlap	h2b4	9.564	359.212	125.645	1953.7	15.463
Ecad MO PO	Partial Overlap	h2b4	9.564	281.269	121.083	968.996	15.463
Ecad MO PO	Partial Overlap	h2b4	9.564	249.512	119.349	1867.048	15.463
Ecad MO PO	Partial Overlap	h2b4	9.564	238.403	112.036	3287.606	15.463
Ecad MO PO	Partial Overlap
Ecad MO PO	Partial Overlap	h2b5	10.321	341.738	126.576	1752.14	16.693
Ecad MO PO	Partial Overlap	h2b5	10.321	297.574	123.37	945.49	16.693
Ecad MO PO	Partial Overlap	h2b5	10.321	234.248	119.37	486.411	16.693
Ecad MO PO	Partial Overlap	h2b5	10.321	208.877	119.652	512.673	16.693
Ecad MO PO	Partial Overlap	h2b5	10.321	191.281	105.714	431.324	16.693
Ecad MO PO	Partial Overlap
Ecad MO PO	Partial Overlap	h2b6	6.43	304.877	113.604	1246.945	10.367
Ecad MO PO	Partial Overlap	h2b6	6.43	326.339	113.591	1583.739	10.367
Ecad MO PO	Partial Overlap	h2b6	6.43	288.649	131.546	1129.499	10.367
Ecad MO PO	Partial Overlap	h2b6	6.43	231.008	128.541	1055.754	10.367
Ecad MO PO	Partial Overlap	h2b6	6.43	210.646	114.149	2534.123	10.367
Ecad MO PO	Partial Overlap	h3b1	12.428	338.105	123.657	1722.284	20.12
Ecad MO PO	Partial Overlap	h3b1	12.428	296.447	132.475	1012.536	20.12
Ecad MO PO	Partial Overlap	h3b1	12.428	248.813	126.588	520.638	20.12
Ecad MO PO	Partial Overlap	h3b1	12.428	216.286	108.539	858.319	20.12
Ecad MO PO	Partial Overlap	h3b1	12.428	203.701	109.037	1239.605	20.12
Ecad MO PO	Partial Overlap
Ecad MO PO	Partial Overlap	h3b2	6.7	416.753	151.779	2033.731	10.807
Ecad MO PO	Partial Overlap	h3b2	6.7	402.611	170.041	1604.438	10.807
Ecad MO PO	Partial Overlap	h3b2	6.7	365.697	162.486	1749.62	10.807
Ecad MO PO	Partial Overlap	h3b2	6.7	354.556	143.437	2313.031	10.807
Ecad MO PO	Partial Overlap
Ecad MO PO	Partial Overlap	h3b3	9.672	291.931	105.194	1295.62	15.639
Ecad MO PO	Partial Overlap	h3b3	9.672	265.299	110.552	815.866	15.639
Ecad MO PO	Partial Overlap	h3b3	9.672	234.317	107.902	995.655	15.639
Ecad MO PO	Partial Overlap	h3b3	9.672	219.332	106.116	965.238	15.639
Ecad MO PO	Partial Overlap	h3b3	9.672	209.612	102.441	767.292	15.639
Ecad MO PO	Partial Overlap
Ecad MO PO	Partial Overlap	h3b4	13.4	449.82	114.439	3171.964	21.701
Ecad MO PO	Partial Overlap	h3b4	13.4	403.702	118.734	3062.834	21.701
Ecad MO PO	Partial Overlap	h3b4	13.4	315.366	117.538	1531.018	21.701
Ecad MO PO	Partial Overlap	h3b4	13.4	242.873	111.196	921.447	21.701
Ecad MO PO	Partial Overlap	h3b4	13.4	187.538	104.22	514.281	21.701
Ecad MO PO	Partial Overlap
Ecad MO PO	Partial Overlap	h3b5	15.292	441.524	123.386	1534.468	24.776
Ecad MO PO	Partial Overlap	h3b5	15.292	383.11	139.699	1411.903	24.776
Ecad MO PO	Partial Overlap	h3b5	15.292	310.462	131.794	1133.152	24.776
Ecad MO PO	Partial Overlap	h3b5	15.292	264.063	118.973	1092.046	24.776
Ecad MO PO	Partial Overlap	h3b5	15.292	232.155	120.085	1036.934	24.776
Ecad MO PO	Partial Overlap	h4b1	9.456	642.652	189.959	3161.564	15.287
Ecad MO PO	Partial Overlap	h4b1	9.456	601.929	200.069	2750.754	15.287
Ecad MO PO	Partial Overlap	h4b1	9.456	508.684	207.594	1759.148	15.287
Ecad MO PO	Partial Overlap	h4b1	9.456	377.549	148.822	964.627	15.287
Ecad MO PO	Partial Overlap	h4b1	9.456	294.898	144.65	684.809	15.287
Ecad MO PO	Partial Overlap	h4b1	9.456	242.785	122.419	515.766	15.287
Ecad MO PO	Partial Overlap
Ecad MO PO	Partial Overlap	h4b2	8.591	568.192	149.6	2380.066	13.881
Ecad MO PO	Partial Overlap	h4b2	8.591	492.793	156.036	1758.865	13.881
Ecad MO PO	Partial Overlap	h4b2	8.591	394.566	140.495	1511.083	13.881
Ecad MO PO	Partial Overlap	h4b2	8.591	303.74	142.687	1662.621	13.881
Ecad MO PO	Partial Overlap	h4b2	8.591	229.79	117.364	1120.158	13.881
Ecad MO PO	Partial Overlap	h4b2	8.591	189.411	111.448	579.058	13.881
Ecad MO PO	Partial Overlap
Ecad MO PO	Partial Overlap	h4b3	7.997	503.928	140.152	1676.673	12.915
Ecad MO PO	Partial Overlap	h4b3	7.997	473.047	151.105	1491.529	12.915
Ecad MO PO	Partial Overlap	h4b3	7.997	408.558	134.827	1526.303	12.915
Ecad MO PO	Partial Overlap	h4b3	7.997	325.281	168.341	1036.049	12.915
Ecad MO PO	Partial Overlap	h4b3	7.997	258.673	134.525	613.01	12.915
Ecad MO PO	Partial Overlap	h4b3	7.997	222.667	119.639	762.729	12.915
Ecad MO PO	Partial Overlap
Ecad MO PO	Partial Overlap	h4b4	6.43	706.599	187.196	3518.084	10.367
Ecad MO PO	Partial Overlap	h4b4	6.43	736.73	194.196	2934.082	10.367
Ecad MO PO	Partial Overlap	h4b4	6.43	641.421	196.026	1658.363	10.367
Ecad MO PO	Partial Overlap	h4b4	6.43	516.771	198.228	1149.322	10.367
Ecad MO PO	Partial Overlap	h4b4	6.43	391.261	169.279	856.767	10.367
Ecad MO PO	Partial Overlap	h4b4	6.43	301.781	138.726	587.901	10.367
Ecad MO PO	Partial Overlap
Ecad MO PO	Partial Overlap	h4b5	7.619	856.929	280.626	3648.744	12.3
Ecad MO PO	Partial Overlap	h4b5	7.619	820.968	294.985	3534.698	12.3
Ecad MO PO	Partial Overlap	h4b5	7.619	752.394	307.139	3322.983	12.3
Ecad MO PO	Partial Overlap	h4b5	7.619	647.11	229.301	4018.058	12.3
Ecad MO PO	Partial Overlap	h4b5	7.619	515.189	149.447	3730.509	12.3
Ecad MO PO	Partial Overlap	h4b5	7.619	383.24	122.617	1407.364	12.3
Ecad MO PO	Partial Overlap
Ecad MO PO	Partial Overlap	h4b6	8.375	573.601	131.727	4095	13.53
Ecad MO PO	Partial Overlap	h4b6	8.375	505.207	144.221	3495.058	13.53
Ecad MO PO	Partial Overlap	h4b6	8.375	413.265	142.333	3261.617	13.53
Ecad MO PO	Partial Overlap	h4b6	8.375	322.563	150.865	2767.992	13.53
Ecad MO PO	Partial Overlap	h4b6	8.375	243.095	118.689	965.273	13.53
Ecad MO PO	Partial Overlap
Ecad MO PO	Partial Overlap	h4b7	4.485	795.128	181.864	4055.021	7.204
Ecad MO PO	Partial Overlap	h4b7	4.485	696.378	163.727	2201.368	7.204
Ecad MO PO	Partial Overlap	h4b7	4.485	586.438	171.532	1476.909	7.204
Ecad MO PO	Partial Overlap	h4b7	4.485	493.986	177.391	1302.268	7.204
Ecad MO PO	Partial Overlap	h4b7	4.485	389.546	159.889	846.846	7.204
Ecad MO PO	Partial Overlap	h5b4	10.375	531.656	164.295	2366.608	16.781
Ecad MO PO	Partial Overlap	h5b4	10.375	550.287	178.56	3058.218	16.781
Ecad MO PO	Partial Overlap	h5b4	10.375	533.454	168.605	2903.836	16.781
Ecad MO PO	Partial Overlap	h5b4	10.375	449.491	162.903	1899.572	16.781
Ecad MO PO	Partial Overlap	h5b4	10.375	354.291	150.801	1563.787	16.781
Ecad MO PO	Partial Overlap	h5b4	10.375	270.403	116.173	766.719	16.781
Ecad MO PO	Partial Overlap	h5b4	10.375	217.507	110.876	660.158	16.781
Ecad MO PO	Partial Overlap	h5b4	10.375	200.179	108.918	612.101	16.781
Ecad MO PO	Partial Overlap
Ecad MO PO	Partial Overlap	h5b5	9.024	364.186	124.046	1341.444	14.584
Ecad MO PO	Partial Overlap	h5b5	9.024	314.861	142.83	1479.205	14.584
Ecad MO PO	Partial Overlap	h5b5	9.024	274.028	135.605	861.31	14.584
Ecad MO PO	Partial Overlap	h5b5	9.024	260.726	121.268	582.904	14.584
Ecad MO PO	Partial Overlap	h5b5	9.024	271.067	118.273	927.589	14.584
Ecad MO PO	Partial Overlap
Ecad MO PO	Partial Overlap	h5b6	7.727	344.315	130.226	2205.922	12.475
Ecad MO PO	Partial Overlap	h5b6	7.727	324.823	129.895	1801.621	12.475
Ecad MO PO	Partial Overlap	h5b6	7.727	303.122	132.441	1684.226	12.475
Ecad MO PO	Partial Overlap	h5b6	7.727	262.443	120.844	636.846	12.475
Ecad MO PO	Partial Overlap	h5b6	7.727	215.787	117.744	571.553	12.475
Ecad MO PO	Partial Overlap
Ecad MO PO	Partial Overlap	h5b7	9.564	484.449	168.608	3864.605	15.463
Ecad MO PO	Partial Overlap	h5b7	9.564	432.124	176.86	4028.397	15.463
Ecad MO PO	Partial Overlap	h5b7	9.564	354.066	157.906	2115.612	15.463
Ecad MO PO	Partial Overlap	h5b7	9.564	276.839	129.38	738.101	15.463
Ecad MO PO	Partial Overlap	h5b7	9.564	233.907	126.12	593.264	15.463
Ecad MO PO	Partial Overlap	h5b7	9.564	225.645	119.711	694.974	15.463
Ecad MO PO	Partial Overlap
Ecad MO PO	Partial Overlap	h5b8	10.429	521.82	120.986	3654.187	16.869
Ecad MO PO	Partial Overlap	h5b8	10.429	452.27	113.758	1724.404	16.869
Ecad MO PO	Partial Overlap	h5b8	10.429	357.087	107.424	1328.011	16.869
Ecad MO PO	Partial Overlap	h5b8	10.429	292.104	104.529	1943.162	16.869
Ecad MO PO	Partial Overlap	h5b8	10.429	262.399	101.931	2289.888	16.869
Ecad MO PO	Partial Overlap	h5b8	10.429	238.405	102.058	1037.054	16.869
Ecad MO PO	Partial Overlap
Ecad MO PO	Partial Overlap	h5b9	9.564	527.523	137.489	2954.299	15.463
Ecad MO PO	Partial Overlap	h5b9	9.564	576.135	126.617	2447.322	15.463
Ecad MO PO	Partial Overlap	h5b9	9.564	566.335	154.844	1370.387	15.463
Ecad MO PO	Partial Overlap	h5b9	9.564	512.008	158.209	1261.471	15.463
Ecad MO PO	Partial Overlap	h5b9	9.564	456.407	166.681	1060.843	15.463
Ecad MO PO	Partial Overlap	h5b9	9.564	412.187	136.436	934.498	15.463
Ecad MO PO	Partial Overlap	h5b9	9.564	356.186	141.669	725.164	15.463
Ecad MO PO	Partial Overlap	h5b9	9.564	315.54	139.988	621.469	15.463
Ecad MO PO	Partial Overlap
Ecad MO PO	Partial Overlap	h5b10	11.725	452.809	125.864	2510.183	18.977
Ecad MO PO	Partial Overlap	h5b10	11.725	383.775	144.858	1771.997	18.977
Ecad MO PO	Partial Overlap	h5b10	11.725	314.854	125.81	1625.531	18.977
Ecad MO PO	Partial Overlap	h5b10	11.725	259.414	128.716	622.726	18.977
Ecad MO PO	Partial Overlap	h5b10	11.725	223.691	108.876	635.599	18.977
Ecad MO PO	Partial Overlap	h5b10	11.725	211.321	117.492	680.768	18.977
Ecad MO PO	Partial Overlap
Ecad MO PO	Partial Overlap	h5b11	10.158	516.975	140.845	2696.218	16.429
Ecad MO PO	Partial Overlap	h5b11	10.158	456.65	159.742	1923.195	16.429
Ecad MO PO	Partial Overlap	h5b11	10.158	379.18	141.129	1557.125	16.429
Ecad MO PO	Partial Overlap	h5b11	10.158	352.977	133.739	1687.606	16.429
Ecad MO PO	Partial Overlap	h5b11	10.158	347.188	132.729	1657.345	16.429
Ecad MO PO	Partial Overlap	h5b11	10.158	321.839	115.351	1939.252	16.429
Ecad MO PO	Partial Overlap
Ecad MO PO	Partial Overlap	h5b12	7.835	611.808	187.975	2319.828	12.652
Ecad MO PO	Partial Overlap	h5b12	7.835	636.961	206.644	2829.8	12.652
Ecad MO PO	Partial Overlap	h5b12	7.835	619.18	229.829	2163.731	12.652
Ecad MO PO	Partial Overlap	h5b12	7.835	479.585	186.661	1060.507	12.652
Ecad MO PO	Partial Overlap	h5b12	7.835	310.652	159.828	584.122	12.652
Ecad MO PO	Partial Overlap	h5b12	7.835	251.924	136.174	670.14	12.652
Ecad MO PO	Partial Overlap	h6b1	3.62	343.257	145.777	1422.222	5.799
Ecad MO PO	Partial Overlap	h6b1	3.62	334.075	145.262	975.957	5.799
Ecad MO PO	Partial Overlap	h6b1	3.62	290.241	151.314	597.102	5.799
Ecad MO PO	Partial Overlap	h6b1	3.62	238.826	134.662	468.631	5.799
Ecad MO PO	Partial Overlap	h6b1	3.62	220.235	135.199	533.176	5.799
Ecad MO PO	Partial Overlap	h6b1	3.62	217.422	124.696	763.422	5.799
Ecad MO PO	Partial Overlap
Ecad MO PO	Partial Overlap	h6b2	9.132	383.587	131.876	1459.987	14.76
Ecad MO PO	Partial Overlap	h6b2	9.132	335.303	150.173	1052.57	14.76
Ecad MO PO	Partial Overlap	h6b2	9.132	272.722	139.154	698.431	14.76
Ecad MO PO	Partial Overlap	h6b2	9.132	234.982	123.225	449.769	14.76
Ecad MO PO	Partial Overlap	h6b2	9.132	227.833	120.087	728.015	14.76
Ecad MO PO	Partial Overlap
Ecad MO PO	Partial Overlap	h6b3	7.889	340.275	110.82	1580.459	12.74
Ecad MO PO	Partial Overlap	h6b3	7.889	291.458	121.792	1009.171	12.74
Ecad MO PO	Partial Overlap	h6b3	7.889	231.661	108.374	669.091	12.74
Ecad MO PO	Partial Overlap	h6b3	7.889	186.927	105.367	359.912	12.74
Ecad MO PO	Partial Overlap	h6b3	7.889	173.651	103.358	410.224	12.74
Ecad MO PO	Partial Overlap
Ecad MO PO	Partial Overlap	h6b4	8.97	276.939	128.254	1423.499	14.497
Ecad MO PO	Partial Overlap	h6b4	8.97	250.156	109.735	974.574	14.497
Ecad MO PO	Partial Overlap	h6b4	8.97	218.126	107.537	1167.08	14.497
Ecad MO PO	Partial Overlap	h6b4	8.97	183.359	104.477	843.773	14.497
Ecad MO PO	Partial Overlap	h6b4	8.97	164.427	104.891	625.849	14.497
Ecad MO PO	Partial Overlap
Ecad MO PO	Partial Overlap	h6b5	7.133	339.629	115.266	3636.868	11.509
Ecad MO PO	Partial Overlap	h6b5	7.133	308.662	127.627	1309.322	11.509
Ecad MO PO	Partial Overlap	h6b5	7.133	247	119.083	757.83	11.509
Ecad MO PO	Partial Overlap	h6b5	7.133	209.926	113.757	513.393	11.509
Ecad MO PO	Partial Overlap	h6b5	7.133	190.669	101.62	710.516	11.509
Ecad MO PO	Partial Overlap
Ecad MO PO	Partial Overlap	h6b6	5.998	247.615	122.532	601.768	9.664
Ecad MO PO	Partial Overlap	h6b6	5.998	224.803	120.774	484.909	9.664
Ecad MO PO	Partial Overlap	h6b6	5.998	195.223	110.907	465.617	9.664
Ecad MO PO	Partial Overlap	h6b6	5.998	165.387	103.878	416.59	9.664
Ecad MO PO	Partial Overlap	h6b6	5.998	142.259	102.255	390.209	9.664
Ecad MO PO	Partial Overlap	h6b6	5.998	129.535	99.475	216.876	9.664
Ecad MO PO	Partial Overlap
Ecad MO PO	Partial Overlap	h6b7	6.322	327.087	106.442	1397.266	10.192
Ecad MO PO	Partial Overlap	h6b7	6.322	282.874	113.542	1407.602	10.192
Ecad MO PO	Partial Overlap	h6b7	6.322	227.313	114.143	1341.483	10.192
Ecad MO PO	Partial Overlap	h6b7	6.322	198.225	109.249	1513.182	10.192
Ecad MO PO	Partial Overlap	h6b7	6.322	166.726	104.127	576.232	10.192
Ecad MO PO	Partial Overlap
Ecad MO PO	Partial Overlap	h6b8	5.511	390.245	109.819	1605.799	8.874
Ecad MO PO	Partial Overlap	h6b8	5.511	351.046	122.029	1927.233	8.874
Ecad MO PO	Partial Overlap	h6b8	5.511	281.377	121.28	1009.026	8.874
Ecad MO PO	Partial Overlap	h6b8	5.511	221.734	122.118	841.99	8.874
Ecad MO PO	Partial Overlap	h6b8	5.511	190.868	115.217	418.902	8.874
Ecad MO PO	Partial Overlap	h7b1	12.05	554.877	171.969	1906.343	19.504
Ecad MO PO	Partial Overlap	h7b1	12.05	476.677	154.734	1789.302	19.504
Ecad MO PO	Partial Overlap	h7b1	12.05	388.395	143.888	1415.271	19.504
Ecad MO PO	Partial Overlap	h7b1	12.05	317.273	129.312	873.144	19.504
Ecad MO PO	Partial Overlap	h7b1	12.05	279.386	123.229	568.37	19.504
Ecad MO PO	Partial Overlap	h7b1	12.05	248.652	135.081	453.089	19.504
Ecad MO PO	Partial Overlap	h7b1	12.05	210.605	119.621	425.697	19.504
Ecad MO PO	Partial Overlap
Ecad MO PO	Partial Overlap	h7b2	8.97	464.63	149.157	2215.049	14.497
Ecad MO PO	Partial Overlap	h7b2	8.97	458.265	188.941	2727.529	14.497
Ecad MO PO	Partial Overlap	h7b2	8.97	456.051	175.402	1963.874	14.497
Ecad MO PO	Partial Overlap	h7b2	8.97	435.696	136.064	1950.872	14.497
Ecad MO PO	Partial Overlap	h7b2	8.97	405.366	123.158	1877.72	14.497
Ecad MO PO	Partial Overlap	h7b2	8.97	369.2	114.154	1656.84	14.497
Ecad MO PO	Partial Overlap	h7b2	8.97	320.123	107.154	1322.822	14.497
Ecad MO PO	Partial Overlap	h7b2	8.97	270.3	100.345	1434.407	14.497
Ecad MO PO	Partial Overlap
Ecad MO PO	Partial Overlap	h7b3	7.187	708.175	203.951	2245.457	11.597
Ecad MO PO	Partial Overlap	h7b3	7.187	618.687	228.181	1916.65	11.597
Ecad MO PO	Partial Overlap	h7b3	7.187	526.868	228.661	1275.002	11.597
Ecad MO PO	Partial Overlap	h7b3	7.187	418.668	206.297	1380.024	11.597
Ecad MO PO	Partial Overlap	h7b3	7.187	332.004	172.621	1174.712	11.597
Ecad MO PO	Partial Overlap	h7b3	7.187	267.417	142.792	697.462	11.597
Ecad MO PO	Partial Overlap
Ecad MO PO	Partial Overlap	h7b4	10.212	757.84	218.841	3874.476	16.517
Ecad MO PO	Partial Overlap	h7b4	10.212	739.469	251.722	4095	16.517
Ecad MO PO	Partial Overlap	h7b4	10.212	683.362	231.738	4095	16.517
Ecad MO PO	Partial Overlap	h7b4	10.212	617.054	230.044	2457.138	16.517
Ecad MO PO	Partial Overlap	h7b4	10.212	573.412	195.173	1665.716	16.517
Ecad MO PO	Partial Overlap	h7b4	10.212	530.024	208.144	1762.144	16.517
Ecad MO PO	Partial Overlap	h7b4	10.212	474.797	154.627	1404.209	16.517
Ecad MO PO	Partial Overlap
Ecad MO PO	Partial Overlap	h7b5	9.672	563.608	167.506	4094.824	15.639
Ecad MO PO	Partial Overlap	h7b5	9.672	501.706	164.98	2586.488	15.639
Ecad MO PO	Partial Overlap	h7b5	9.672	429.967	162.911	1538.172	15.639
Ecad MO PO	Partial Overlap	h7b5	9.672	395.883	150.674	1152.709	15.639
Ecad MO PO	Partial Overlap	h7b5	9.672	374.946	145.273	1230.027	15.639
Ecad MO PO	Partial Overlap
Ecad MO PO	Partial Overlap	h7b6	9.618	668.417	206.454	2493.494	15.551
Ecad MO PO	Partial Overlap	h7b6	9.618	582.973	198.479	2588.466	15.551
Ecad MO PO	Partial Overlap	h7b6	9.618	441.96	163.011	1350.526	15.551
Ecad MO PO	Partial Overlap	h7b6	9.618	349.731	151.814	886.636	15.551
Ecad MO PO	Partial Overlap	h7b6	9.618	300.254	137.571	706.778	15.551
Ecad MO PO	Partial Overlap	h7b6	9.618	287.176	126.602	816.934	15.551
Ecad MO PO	Partial Overlap
Ecad MO PO	Partial Overlap	h7b7	7.673	475.73	131.095	1934.16	12.388
Ecad MO PO	Partial Overlap	h7b7	7.673	406.344	132.402	1346.013	12.388
Ecad MO PO	Partial Overlap	h7b7	7.673	324.101	129.532	1050.937	12.388
Ecad MO PO	Partial Overlap	h7b7	7.673	265.56	111.806	1087.176	12.388
Ecad MO PO	Partial Overlap	h7b7	7.673	229.736	115.014	845.848	12.388
Ecad MO PO	Partial Overlap
Ecad MO PO	Partial Overlap	h7b8	9.402	545.13	158.824	3675.385	15.2
Ecad MO PO	Partial Overlap	h7b8	9.402	496.235	160.08	1954.86	15.2
Ecad MO PO	Partial Overlap	h7b8	9.402	438.014	166.36	1430.095	15.2
Ecad MO PO	Partial Overlap	h7b8	9.402	398.351	154.104	1871.426	15.2
Ecad MO PO	Partial Overlap	h7b8	9.402	377.499	138.025	1947.533	15.2
Ecad MO PO	Partial Overlap
Ecad MO PO	Partial Overlap	h7b9	8.213	630.941	290.429	1857.765	13.267
Ecad MO PO	Partial Overlap	h7b9	8.213	623.18	283.986	2311.456	13.267
Ecad MO PO	Partial Overlap	h7b9	8.213	623.307	266.777	2923.207	13.267
Ecad MO PO	Partial Overlap	h7b9	8.213	610.519	226.755	3226.151	13.267
Ecad MO PO	Partial Overlap	h7b9	8.213	579.268	190.534	1728.341	13.267
Ecad MO PO	Partial Overlap	h7b9	8.213	543.74	164.935	1863.298	13.267
Ecad MO PO	Partial Overlap	h7b9	8.213	543.74	164.935	1863.298	13.267
Ecad MO PO	Partial Overlap	h8b1	9.024	405.577	123.487	1244.787	14.585
Ecad MO PO	Partial Overlap	h8b1	9.024	456.034	131.141	1298.557	14.585
Ecad MO PO	Partial Overlap	h8b1	9.024	383.157	134.647	921.402	14.585
Ecad MO PO	Partial Overlap	h8b1	9.024	271.337	124.606	584.262	14.585
Ecad MO PO	Partial Overlap	h8b1	9.024	196.701	110.141	412.023	14.585
Ecad MO PO	Partial Overlap	h8b1	9.024	161.808	103.741	297.7	14.585
Ecad MO PO	Partial Overlap
Ecad MO PO	Partial Overlap	h8b2	9.348	442.582	116.479	1858.71	15.111
Ecad MO PO	Partial Overlap	h8b2	9.348	460.803	117.97	3310.764	15.111
Ecad MO PO	Partial Overlap	h8b2	9.348	372.689	152.219	2570.19	15.111
Ecad MO PO	Partial Overlap	h8b2	9.348	288.948	116.865	844.301	15.111
Ecad MO PO	Partial Overlap	h8b2	9.348	257.291	122.021	850.877	15.111
Ecad MO PO	Partial Overlap	h8b2	9.348	226.952	114.519	539.97	15.111
Ecad MO PO	Partial Overlap	h8b2	9.348	202.814	108.835	403.236	15.111
Ecad MO PO	Partial Overlap
Ecad MO PO	Partial Overlap	h8b3	7.349	414.239	135.302	1031.904	11.853
Ecad MO PO	Partial Overlap	h8b3	7.349	426.664	129.583	1268.202	11.853
Ecad MO PO	Partial Overlap	h8b3	7.349	382.569	128.709	953.028	11.853
Ecad MO PO	Partial Overlap	h8b3	7.349	336.275	121.136	1174.071	11.853
Ecad MO PO	Partial Overlap	h8b3	7.349	309.763	114.859	1172.631	11.853
Ecad MO PO	Partial Overlap	h8b3	7.349	286.421	117.244	1090.282	11.853
Ecad MO PO	Partial Overlap	h8b3	7.349	262.901	120.724	878.654	11.853
Ecad MO PO	Partial Overlap	h8b3	7.349	234.693	115.077	999.414	11.853
Ecad MO PO	Partial Overlap
Ecad MO PO	Partial Overlap	h8b4	7.024	444.869	175.402	1306.953	11.333
Ecad MO PO	Partial Overlap	h8b4	7.024	435.008	165.531	1507.18	11.333
Ecad MO PO	Partial Overlap	h8b4	7.024	417.603	154.4	1437.567	11.333
Ecad MO PO	Partial Overlap	h8b4	7.024	393.724	156.581	1550.809	11.333
Ecad MO PO	Partial Overlap	h8b4	7.024	370.172	152.235	1298.664	11.333
Ecad MO PO	Partial Overlap	h8b4	7.024	335.471	131.318	1387.224	11.333
Ecad MO PO	Partial Overlap	h8b4	7.024	303.098	121.904	1471.45	11.333
Ecad MO PO	Partial Overlap	h8b4	7.024	277.47	111.83	1289.082	11.333
Ecad MO PO	Partial Overlap
Ecad MO PO	Partial Overlap	h8b5	8.051	396.234	177.647	935.534	13.002
Ecad MO PO	Partial Overlap	h8b5	8.051	339.158	140.089	803.602	13.002
Ecad MO PO	Partial Overlap	h8b5	8.051	250.896	116.919	520.668	13.002
Ecad MO PO	Partial Overlap	h8b5	8.051	187.449	115.533	405.306	13.002
Ecad MO PO	Partial Overlap	h8b5	8.051	165.488	101.381	391.861	13.002
Ecad MO PO	Partial Overlap	h8b5	8.051	147.488	98.009	340.932	13.002
Ecad MO PO	Partial Overlap
Ecad MO NO	No Overlap	h1b1	11.833	551.738	139.864	2080.634	19.153
Ecad MO NO	No Overlap	h1b1	11.833	610.404	133.118	3099.716	19.153
Ecad MO NO	No Overlap	h1b1	11.833	643.041	134.669	3570.801	19.153
Ecad MO NO	No Overlap	h1b1	11.833	665.579	151.229	4076.188	19.153
Ecad MO NO	No Overlap	h1b1	11.833	608.978	142.729	3924.274	19.153
Ecad MO NO	No Overlap	h1b1	11.833	513.258	130.17	2016.562	19.153
Ecad MO NO	No Overlap	h1b1	11.833	446.322	130.595	1432.907	19.153
Ecad MO NO	No Overlap	h1b1	11.833	360.212	141.851	1242.377	19.153
Ecad MO NO	No Overlap	h1b1	11.833	282.336	129.88	842.666	19.153
Ecad MO NO	No Overlap
Ecad MO NO	No Overlap	h1b2	6.7	810.875	207.165	3859.743	10.806
Ecad MO NO	No Overlap	h1b2	6.7	872.104	254.492	3253.643	10.806
Ecad MO NO	No Overlap	h1b2	6.7	883.474	226.916	3742.528	10.806
Ecad MO NO	No Overlap	h1b2	6.7	831.543	173.403	3997.746	10.806
Ecad MO NO	No Overlap	h1b2	6.7	715.354	187.154	3709.431	10.806
Ecad MO NO	No Overlap	h1b2	6.7	599.539	190.202	2387.582	10.806
Ecad MO NO	No Overlap	h1b2	6.7	439.066	171.996	1900.578	10.806
Ecad MO NO	No Overlap	h1b2	6.7	314.852	153.18	1230.139	10.806
Ecad MO NO	No Overlap	h1b2	6.7	228.174	124.42	507.711	10.806
Ecad MO NO	No Overlap
Ecad MO NO	No Overlap	h1b3	8.645	544.96	128.492	1515.355	13.969
Ecad MO NO	No Overlap	h1b3	8.645	549.623	115.572	2050.246	13.969
Ecad MO NO	No Overlap	h1b3	8.645	540.711	122.856	2517.838	13.969
Ecad MO NO	No Overlap	h1b3	8.645	528.744	120.198	1930.044	13.969
Ecad MO NO	No Overlap	h1b3	8.916	513.573	120.054	1708.033	14.409
Ecad MO NO	No Overlap	h1b3	8.916	423.758	100.74	1155.313	14.409
Ecad MO NO	No Overlap	h1b3	8.916	367.102	119.946	899.146	14.409
Ecad MO NO	No Overlap	h1b3	8.916	303.21	110.942	610.987	14.409
Ecad MO NO	No Overlap	h1b3	8.916	245.43	126.371	607.406	14.409
Ecad MO NO	No Overlap	h1b3	8.916	205.353	109.493	684.058	14.409
Ecad MO NO	No Overlap
Ecad MO NO	No Overlap	h1b4	7.727	738.914	164.593	3074.27	12.476
Ecad MO NO	No Overlap	h1b4	7.727	652.971	183.566	2378.738	12.476
Ecad MO NO	No Overlap	h1b4	7.727	616.347	175.011	2707.256	12.476
Ecad MO NO	No Overlap	h1b4	7.727	583.427	173.242	2061.336	12.476
Ecad MO NO	No Overlap	h1b4	7.727	532.989	199.215	1643.453	12.476
Ecad MO NO	No Overlap	h1b4	7.727	501.658	188.741	1777.597	12.476
Ecad MO NO	No Overlap	h1b4	7.727	479.738	192.028	1893.606	12.476
Ecad MO NO	No Overlap	h1b4	7.727	429.51	167.211	1826.319	12.476
Ecad MO NO	No Overlap	h1b4	7.727	352.309	134.293	1019.849	12.476
Ecad MO NO	No Overlap	h1b4	7.727	274.101	120.638	933.151	12.476
Ecad MO NO	No Overlap
Ecad MO NO	No Overlap	h1b5	7.565	679.407	179.615	2865.585	12.212
Ecad MO NO	No Overlap	h1b5	7.565	648.84	210.511	1580.499	12.212
Ecad MO NO	No Overlap	h1b5	7.565	478.696	184.267	1091.202	12.212
Ecad MO NO	No Overlap	h1b5	7.565	332.962	160.342	593.291	12.212
Ecad MO NO	No Overlap	h1b5	7.565	281.223	160.905	548.005	12.212
Ecad MO NO	No Overlap	h1b5	7.565	231.548	136.389	467.152	12.212
Ecad MO NO	No Overlap	h1b5	7.565	202.429	111.218	460.662	12.212
Ecad MO NO	No Overlap
Ecad MO NO	No Overlap	h1b6	9.456	637.74	125.537	3082.27	15.287
Ecad MO NO	No Overlap	h1b6	9.456	630.608	114.439	3307.802	15.287
Ecad MO NO	No Overlap	h1b6	9.456	573.007	128.693	2820.981	15.287
Ecad MO NO	No Overlap	h1b6	8.321	579.542	125.666	4026.707	13.442
Ecad MO NO	No Overlap	h1b6	8.321	503.453	120.634	1584.624	13.442
Ecad MO NO	No Overlap	h1b6	8.321	439.718	119.822	1403.3	13.442
Ecad MO NO	No Overlap	h1b6	8.321	350.505	110.246	1023.088	13.442
Ecad MO NO	No Overlap	h1b6	8.321	287.348	105.835	1039.282	13.442
Ecad MO NO	No Overlap	h1b6	8.321	232.956	113.956	1131.313	13.442
Ecad MO NO	No Overlap	h1b6	8.321	195.913	113.761	769.271	13.442
Ecad MO NO	No Overlap
Ecad MO NO	No Overlap	h1b7	9.78	561.071	108.318	3511.239	15.815
Ecad MO NO	No Overlap	h1b7	9.78	581.746	103.542	4093.957	15.815
Ecad MO NO	No Overlap	h1b7	9.78	528.938	129.823	3992.359	15.815
Ecad MO NO	No Overlap	h1b7	9.78	439.524	128.969	1725.215	15.815
Ecad MO NO	No Overlap	h1b7	9.348	649.918	165.696	2084.527	15.111
Ecad MO NO	No Overlap	h1b7	9.348	511.629	201.574	1629.214	15.111
Ecad MO NO	No Overlap	h1b7	9.348	370.847	157.051	703.051	15.111
Ecad MO NO	No Overlap	h1b7	9.348	267.043	115.249	574.365	15.111
Ecad MO NO	No Overlap
Ecad MO NO	No Overlap	h1b8	9.348	556.694	141.338	1544.474	15.112
Ecad MO NO	No Overlap	h1b8	9.348	525.621	145.496	1802.063	15.112
Ecad MO NO	No Overlap	h1b8	9.348	468.795	162.765	2337.698	15.112
Ecad MO NO	No Overlap	h1b8	9.348	412.471	155.037	2022.848	15.112
Ecad MO NO	No Overlap	h1b8	9.348	347.505	148.406	1490.718	15.112
Ecad MO NO	No Overlap	h1b8	9.348	266.704	115.72	760.989	15.112
Ecad MO NO	No Overlap	h1b8	9.348	202.91	111.829	439.061	15.112
Ecad MO NO	No Overlap	h2b1	11.077	419.217	167.241	1341.745	17.923
Ecad MO NO	No Overlap	h2b1	11.077	373.663	153.103	2098.094	17.923
Ecad MO NO	No Overlap	h2b1	11.077	320.922	135.174	1163.942	17.923
Ecad MO NO	No Overlap	h2b1	11.077	256.606	119.143	1183.214	17.923
Ecad MO NO	No Overlap	h2b1	11.077	215.595	114.287	1354.409	17.923
Ecad MO NO	No Overlap	h2b1	11.077	195.002	106.823	628.845	17.923
Ecad MO NO	No Overlap
Ecad MO NO	No Overlap	h2b2	12.212	469.677	144.775	4095	19.768
Ecad MO NO	No Overlap	h2b2	12.212	372.303	108.76	1083.544	19.768
Ecad MO NO	No Overlap	h2b2	12.212	305.807	145.787	912.796	19.768
Ecad MO NO	No Overlap	h2b2	12.212	246.111	124.875	568.408	19.768
Ecad MO NO	No Overlap	h2b2	12.212	218.224	110.643	454.613	19.768
Ecad MO NO	No Overlap	h2b2	12.212	209.93	103.75	959.562	19.768
Ecad MO NO	No Overlap
Ecad MO NO	No Overlap	h2b3	8.808	411.392	165.771	2088.165	14.233
Ecad MO NO	No Overlap	h2b3	8.808	448.948	176.341	3002.576	14.233
Ecad MO NO	No Overlap	h2b3	8.808	392.972	152.132	1675.733	14.233
Ecad MO NO	No Overlap	h2b3	8.808	323.834	141.657	819.271	14.233
Ecad MO NO	No Overlap	h2b3	8.808	264.965	121.787	678.433	14.233
Ecad MO NO	No Overlap	h2b3	8.808	241.148	131.305	667.79	14.233
Ecad MO NO	No Overlap
Ecad MO NO	No Overlap	h2b4	7.781	566.265	125.854	1777.045	12.564
Ecad MO NO	No Overlap	h2b4	7.781	406.882	151.293	1222.557	12.564
Ecad MO NO	No Overlap	h2b4	7.781	313.767	125.771	768.205	12.564
Ecad MO NO	No Overlap	h2b4	7.781	243.897	126.087	585.818	12.564
Ecad MO NO	No Overlap	h2b4	7.781	197.088	99.929	478.062	12.564
Ecad MO NO	No Overlap	h2b4	7.781	181.259	103.696	511.296	12.564
Ecad MO NO	No Overlap
Ecad MO NO	No Overlap	h2b5	6.754	648.594	186.34	3282.718	10.894
Ecad MO NO	No Overlap	h2b5	6.754	642.624	183.146	3503.504	10.894
Ecad MO NO	No Overlap	h2b5	6.754	517.831	182.046	1795.886	10.894
Ecad MO NO	No Overlap	h2b5	6.754	394.074	154.857	1893.511	10.894
Ecad MO NO	No Overlap	h2b5	6.754	272.093	130.74	1569.635	10.894
Ecad MO NO	No Overlap	h2b5	6.754	213.919	114.62	627.867	10.894
Ecad MO NO	No Overlap	h2b5	6.754	169.317	99.888	421.936	10.894
Ecad MO NO	No Overlap
Ecad MO NO	No Overlap	h2b6	12.32	560.213	166.548	2212.979	19.944
Ecad MO NO	No Overlap	h2b6	12.32	520.062	141.906	2627.194	19.944
Ecad MO NO	No Overlap	h2b6	12.32	387.389	145.468	1978.43	19.944
Ecad MO NO	No Overlap	h2b6	12.32	282.337	126.568	798.934	19.944
Ecad MO NO	No Overlap	h2b6	12.32	204.438	105.748	492.74	19.944
Ecad MO NO	No Overlap	h2b6	12.32	159.587	107.583	370.158	19.944
Ecad MO NO	No Overlap	h2b6	12.32	140.421	100.993	263.59	19.944
Ecad MO NO	No Overlap
Ecad MO NO	No Overlap	h2b7	6.268	657.648	178.709	2693.834	10.104
Ecad MO NO	No Overlap	h2b7	6.268	591.17	190.368	2523.742	10.104
Ecad MO NO	No Overlap	h2b7	6.268	428.666	173.588	1121.863	10.104
Ecad MO NO	No Overlap	h2b7	6.268	320.546	141.707	1036.89	10.104
Ecad MO NO	No Overlap	h2b7	6.268	233.593	119.041	493.623	10.104
Ecad MO NO	No Overlap	h3b1	10.212	450.149	147.149	1885.274	16.517
Ecad MO NO	No Overlap	h3b1	10.212	421.308	141.992	1152.227	16.517
Ecad MO NO	No Overlap	h3b1	10.212	366.551	130.513	1734.857	16.517
Ecad MO NO	No Overlap	h3b1	10.212	302.743	114.986	2105.933	16.517
Ecad MO NO	No Overlap	h3b1	10.212	262.391	116.065	1649.034	16.517
Ecad MO NO	No Overlap
Ecad MO NO	No Overlap	h3b2	10.429	432.653	126.222	3281.817	16.869
Ecad MO NO	No Overlap	h3b2	10.429	357.05	133.856	2508.394	16.869
Ecad MO NO	No Overlap	h3b2	10.429	272.519	127.296	770.408	16.869
Ecad MO NO	No Overlap	h3b2	10.429	221.371	117.447	594.071	16.869
Ecad MO NO	No Overlap	h3b2	10.429	196.669	116.382	660.898	16.869
Ecad MO NO	No Overlap	h3b2	10.429	178.162	112.068	522.64	16.869
Ecad MO NO	No Overlap
Ecad MO NO	No Overlap	h3b3	8.321	441.43	122.779	3239.249	13.442
Ecad MO NO	No Overlap	h3b3	8.321	380.656	111.401	1879.746	13.442
Ecad MO NO	No Overlap	h3b3	8.321	299.218	111.586	1017.504	13.442
Ecad MO NO	No Overlap	h3b3	8.321	233.031	110.032	654.671	13.442
Ecad MO NO	No Overlap	h3b3	8.321	201.826	108.4	493.753	13.442
Ecad MO NO	No Overlap	h3b3	8.321	175.669	101.364	469.651	13.442
Ecad MO NO	No Overlap
Ecad MO NO	No Overlap	h3b4	10.537	326.044	132.338	2135.802	17.045
Ecad MO NO	No Overlap	h3b4	10.537	315.822	131.573	3245.701	17.045
Ecad MO NO	No Overlap	h3b4	10.537	290.36	123.7	3428.763	17.045
Ecad MO NO	No Overlap	h3b4	10.537	249.631	114.662	1622.816	17.045
Ecad MO NO	No Overlap	h3b4	10.537	224.358	112.268	715.04	17.045
Ecad MO NO	No Overlap	h4b1	6.754	753.62	246.811	2104.823	10.894
Ecad MO NO	No Overlap	h4b1	6.754	667.136	223.672	3449.164	10.894
Ecad MO NO	No Overlap	h4b1	6.754	505.673	165.896	3261.317	10.894
Ecad MO NO	No Overlap	h4b1	7.241	518.152	157.172	1252.585	11.685
Ecad MO NO	No Overlap	h4b1	7.241	487.781	131.85	1303.845	11.685
Ecad MO NO	No Overlap	h4b1	7.241	401.613	127.087	1721.201	11.685
Ecad MO NO	No Overlap	h4b1	7.241	320.326	127.054	2850.797	11.685
Ecad MO NO	No Overlap
Ecad MO NO	No Overlap	h4b2	7.403	758.18	188.58	3796.323	11.949
Ecad MO NO	No Overlap	h4b2	7.403	698.309	187.271	2972.392	11.949
Ecad MO NO	No Overlap	h4b2	7.403	571.662	210.16	2057.626	11.949
Ecad MO NO	No Overlap	h4b2	7.403	452.83	183.96	3372.901	11.949
Ecad MO NO	No Overlap	h4b2	7.403	348.446	165.849	3927.246	11.949
Ecad MO NO	No Overlap	h4b2	7.403	274.533	137.847	2269.845	11.949
Ecad MO NO	No Overlap
Ecad MO NO	No Overlap	h4b3	6.7	942.212	202.707	3788.207	10.807
Ecad MO NO	No Overlap	h4b3	6.7	962.102	280.308	2772.197	10.807
Ecad MO NO	No Overlap	h4b3	6.7	871.662	343.277	1923.781	10.807
Ecad MO NO	No Overlap	h4b3	6.7	695.189	261.915	1719.227	10.807
Ecad MO NO	No Overlap	h4b3	6.7	560.344	237.451	1618.426	10.807
Ecad MO NO	No Overlap	h4b3	6.7	458.896	201.105	1326.265	10.807
Ecad MO NO	No Overlap	h4b3	6.7	380.554	169.769	970.809	10.807
Ecad MO NO	No Overlap
Ecad MO NO	No Overlap	h4b4	8.754	730.825	263.714	2378.907	14.145
Ecad MO NO	No Overlap	h4b4	8.754	617.623	213.063	2631.575	14.145
Ecad MO NO	No Overlap	h4b4	8.754	539.762	201.022	2144.201	14.145
Ecad MO NO	No Overlap	h4b4	8.754	423.973	165.494	1662.127	14.145
Ecad MO NO	No Overlap	h4b4	8.754	338.305	149.531	1441.907	14.145
Ecad MO NO	No Overlap	h4b4	8.754	287.882	125.4	1175.826	14.145
Ecad MO NO	No Overlap	h4b4	8.754	263.467	118.876	1299.146	14.145
Ecad MO NO	No Overlap
Ecad MO NO	No Overlap	h4b5	6.916	908.187	269.624	2631.941	11.158
Ecad MO NO	No Overlap	h4b5	6.916	906.752	236.092	2555.866	11.158
Ecad MO NO	No Overlap	h4b5	6.916	853.835	272.315	2649.42	11.158
Ecad MO NO	No Overlap	h4b5	6.916	785.896	216.437	2632.755	11.158
Ecad MO NO	No Overlap	h4b5	6.916	599.089	227.85	2140.955	11.158
Ecad MO NO	No Overlap	h4b5	6.916	408.338	172.049	1356.609	11.158
Ecad MO NO	No Overlap	h4b5	6.916	303.019	138.168	812.507	11.158
Ecad MO NO	No Overlap
Ecad MO NO	No Overlap	h4b6	7.619	894.377	210.924	3411.675	12.289
Ecad MO NO	No Overlap	h4b6	7.619	830.055	268.45	2361.006	12.289
Ecad MO NO	No Overlap	h4b6	7.619	671.315	188.674	2341.682	12.289
Ecad MO NO	No Overlap	h4b6	7.619	504.409	154.164	1458.456	12.289
Ecad MO NO	No Overlap	h4b6	7.619	368.106	118.841	956.283	12.289
Ecad MO NO	No Overlap	h4b6	7.619	253.212	112.69	696.756	12.289
Ecad MO NO	No Overlap
Ecad MO NO	No Overlap	h4b7	8.375	746.903	286.439	3114.866	13.53
Ecad MO NO	No Overlap	h4b7	8.375	713.706	226.577	2824.269	13.53
Ecad MO NO	No Overlap	h4b7	8.375	610.291	257.533	2188.131	13.53
Ecad MO NO	No Overlap	h4b7	8.375	505.607	216.682	1550.106	13.53
Ecad MO NO	No Overlap	h4b7	8.375	393.311	153.194	1079.112	13.53
Ecad MO NO	No Overlap	h4b7	8.375	310.456	139.12	976.226	13.53
Ecad MO NO	No Overlap
Ecad MO NO	No Overlap	h4b8	8.754	789.266	219.198	3910.999	14.145
Ecad MO NO	No Overlap	h4b8	8.754	787.794	227.163	3903.212	14.145
Ecad MO NO	No Overlap	h4b8	8.754	740.495	213	3600.76	14.145
Ecad MO NO	No Overlap	h4b8	8.754	644.545	196.707	2121.5	14.145
Ecad MO NO	No Overlap	h4b8	8.754	546.359	180.174	1585.49	14.145
Ecad MO NO	No Overlap	h4b8	8.754	487.667	146.655	1178.79	14.145
Ecad MO NO	No Overlap
Ecad MO NO	No Overlap	h4b9	6.916	543.385	163.175	1645.431	11.158
Ecad MO NO	No Overlap	h4b9	6.916	560.75	162.04	1865.098	11.158
Ecad MO NO	No Overlap	h4b9	6.916	495.365	176.851	1240.309	11.158
Ecad MO NO	No Overlap	h4b9	6.916	431.987	162.577	1016.773	11.158
Ecad MO NO	No Overlap	h4b9	6.916	381.455	162.233	961.761	11.158
Ecad MO NO	No Overlap	h4b9	6.916	340.334	128.35	1003.271	11.158
Ecad MO NO	No Overlap	h4b9	6.916	276.645	139.426	918.124	11.158
Ecad MO NO	No Overlap
Ecad MO NO	No Overlap	h4b10	10.861	696.235	150.754	2960.886	17.572
Ecad MO NO	No Overlap	h4b10	10.861	739.895	163.949	3587.003	17.572
Ecad MO NO	No Overlap	h4b10	10.861	727.674	193.176	3425.184	17.572
Ecad MO NO	No Overlap	h4b10	10.861	640.363	165.681	3242.106	17.572
Ecad MO NO	No Overlap	h4b10	10.861	503.634	168.694	3122.043	17.572
Ecad MO NO	No Overlap	h4b10	10.861	405.836	142.193	1877.038	17.572
Ecad MO NO	No Overlap	h4b10	10.861	346.496	133.24	2302.093	17.572
Ecad MO NO	No Overlap
Ecad MO NO	No Overlap	h4b11	7.078	915.616	211.534	3687.435	11.422
Ecad MO NO	No Overlap	h4b11	7.078	801.647	221.113	2245.762	11.422
Ecad MO NO	No Overlap	h4b11	7.078	674.137	205.038	1946.218	11.422
Ecad MO NO	No Overlap	h4b11	7.078	496.256	168.864	1564.316	11.422
Ecad MO NO	No Overlap	h4b11	7.078	330.811	140.596	785.248	11.422
Ecad MO NO	No Overlap	h4b11	7.078	247.039	133.761	449.693	11.422
Ecad MO NO	No Overlap	h5b13	6.322	814.83	238.385	2623.368	10.192
Ecad MO NO	No Overlap	h5b13	6.322	755.78	280.981	2005.899	10.192
Ecad MO NO	No Overlap	h5b13	6.322	597.561	181.706	1573.301	10.192
Ecad MO NO	No Overlap	h5b13	6.322	419.526	146.994	990.698	10.192
Ecad MO NO	No Overlap	h5b13	6.322	313.4	125.218	838.75	10.192
[truncated: 215 more rows]
