# Supplementary material for: Stepwise polarisation of developing bilayered epidermis is mediated by aPKC and E-cadherin in zebrafish
Source: eLife. 2020 Jan 22;9:e49064. doi: 10.7554/eLife.49064 (PMC6975926; doi:10.7554/eLife.49064)
Supplement: Figure 4—figure supplement 2—source data 3. [file elife-49064-fig4-figsupp2-data3.csv]

Genotype	Boundary	Cell name	Area	Mean	Min	Max	Length
Ctrl MO CO	Complete Overlap	h1b1	11.077	262.163	107.133	577.625	17.923
Ctrl MO CO	Complete Overlap	h1b1	11.077	278.763	116.105	610.203	17.923
Ctrl MO CO	Complete Overlap	h1b1	11.077	284.921	112.605	817.858	17.923
Ctrl MO CO	Complete Overlap	h1b1	11.077	265.802	108.797	907.498	17.923
Ctrl MO CO	Complete Overlap	h1b1	11.077	250.741	105.973	861.913	17.923
Ctrl MO CO	Complete Overlap	h1b1	11.077	243.071	103.873	872.291	17.923
Ctrl MO CO	Complete Overlap	h1b1	11.077	235.487	115.382	927.153	17.923
Ctrl MO CO	Complete Overlap	h1b1	11.077	231.229	110.526	909.281	17.923
Ctrl MO CO	Complete Overlap	h1b1	11.077	242.021	108.506	1610.995	17.923
Ctrl MO CO	Complete Overlap
Ctrl MO CO	Complete Overlap	h1b2	14.103	256.342	107.341	811.156	22.843
Ctrl MO CO	Complete Overlap	h1b2	14.103	276.655	107.771	893.914	22.843
Ctrl MO CO	Complete Overlap	h1b2	14.103	272.473	113.531	897.55	22.843
Ctrl MO CO	Complete Overlap	h1b2	14.103	264.641	107.26	821.851	22.843
Ctrl MO CO	Complete Overlap	h1b2	14.103	262.604	115.45	894.471	22.843
Ctrl MO CO	Complete Overlap	h1b2	14.103	270.299	119.076	904.408	22.843
Ctrl MO CO	Complete Overlap	h1b2	14.103	279.111	108.38	930.335	22.843
Ctrl MO CO	Complete Overlap	h1b2	14.103	290.987	119.195	965.748	22.843
Ctrl MO CO	Complete Overlap	h1b2	14.103	314.639	118.054	991.065	22.843
Ctrl MO CO	Complete Overlap	h1b2	14.103	347.914	126.413	1377.577	22.843
Ctrl MO CO	Complete Overlap	h1b2	14.103	372.65	133.136	1811.244	22.843
Ctrl MO CO	Complete Overlap	h1b2	14.103	373.849	134.388	1475.831	22.843
Ctrl MO CO	Complete Overlap
Ctrl MO CO	Complete Overlap	h2b1	9.888	283.249	112.521	923.395	15.99
Ctrl MO CO	Complete Overlap	h2b1	9.888	301.749	119.446	1009.467	15.99
Ctrl MO CO	Complete Overlap	h2b1	9.888	320.518	114.642	1091.634	15.99
Ctrl MO CO	Complete Overlap	h2b1	9.888	336.446	112.773	1068.866	15.99
Ctrl MO CO	Complete Overlap	h2b1	9.888	345.9	119.298	1092.779	15.99
Ctrl MO CO	Complete Overlap	h2b1	9.888	365.285	118.508	1506.211	15.99
Ctrl MO CO	Complete Overlap	h2b1	9.888	380.894	119.046	1365.271	15.99
Ctrl MO CO	Complete Overlap	h2b1	9.888	401.285	137.167	1264.276	15.99
Ctrl MO CO	Complete Overlap	h2b1	9.888	388.423	126.225	1221.643	15.99
Ctrl MO CO	Complete Overlap
Ctrl MO CO	Complete Overlap	h2b2	5.89	188.685	103.453	858.814	9.489
Ctrl MO CO	Complete Overlap	h2b2	5.89	237.586	102.936	1143.398	9.489
Ctrl MO CO	Complete Overlap	h2b2	5.89	261.153	106.825	1169.269	9.489
Ctrl MO CO	Complete Overlap	h2b2	5.89	270.04	102.264	980.47	9.489
Ctrl MO CO	Complete Overlap	h2b2	5.89	269.291	104.983	887.733	9.489
Ctrl MO CO	Complete Overlap	h2b2	5.944	379.699	127.135	837.31	9.577
Ctrl MO CO	Complete Overlap	h2b2	5.944	360.567	115.972	882.621	9.577
Ctrl MO CO	Complete Overlap	h2b2	5.944	329.308	127.19	819.429	9.577
Ctrl MO CO	Complete Overlap	h2b2	5.944	309.97	136.083	782.91	9.577
Ctrl MO CO	Complete Overlap	h2b2	5.944	292.553	118.671	866.821	9.577
Ctrl MO CO	Complete Overlap	h2b2	5.944	289.094	115.295	905.371	9.577
Ctrl MO CO	Complete Overlap	h2b2	5.89	333.201	139.635	734.041	9.489
Ctrl MO CO	Complete Overlap	h2b2	5.89	341.322	138.8	853.049	9.489
Ctrl MO CO	Complete Overlap	h2b2	5.89	352.177	137.318	1336.35	9.489
Ctrl MO CO	Complete Overlap	h2b2	5.89	374.256	145.504	1779.475	9.489
Ctrl MO CO	Complete Overlap
Ctrl MO CO	Complete Overlap	h2b3	11.563	230.079	97.824	633.029	18.714
Ctrl MO CO	Complete Overlap	h2b3	11.563	234.447	97.605	772.544	18.714
Ctrl MO CO	Complete Overlap	h2b3	11.563	218.783	98.783	862.672	18.714
Ctrl MO CO	Complete Overlap	h2b3	10.699	349.342	125.68	1106.161	17.308
Ctrl MO CO	Complete Overlap	h2b3	10.699	339.174	120.225	909.437	17.308
Ctrl MO CO	Complete Overlap	h2b3	10.699	332.953	123.354	872.346	17.308
Ctrl MO CO	Complete Overlap	h2b3	10.699	321.148	118.006	833.438	17.308
Ctrl MO CO	Complete Overlap	h2b3	10.699	309.558	138.435	893.827	17.308
Ctrl MO CO	Complete Overlap	h2b3	10.699	294.835	131.751	894.022	17.308
Ctrl MO CO	Complete Overlap	h3b1	12.914	239.714	106.628	721.227	20.91
Ctrl MO CO	Complete Overlap	h3b1	12.914	292.26	106.47	1195.827	20.91
Ctrl MO CO	Complete Overlap	h3b1	12.914	326.017	114.396	1324.007	20.91
Ctrl MO CO	Complete Overlap	h3b1	12.914	348.604	119.546	1573.931	20.91
Ctrl MO CO	Complete Overlap	h3b1	12.914	363.257	127.529	1358.496	20.91
Ctrl MO CO	Complete Overlap	h3b1	12.914	385.64	122.619	1896.031	20.91
Ctrl MO CO	Complete Overlap	h3b1	12.914	377.154	130.685	1480.398	20.91
Ctrl MO CO	Complete Overlap
Ctrl MO CO	Complete Overlap	h3b2	12.752	240.998	109.876	984.208	20.647
Ctrl MO CO	Complete Overlap	h3b2	12.752	314.8	117.035	1566.523	20.647
Ctrl MO CO	Complete Overlap	h3b2	12.752	382.278	122.254	1940.588	20.647
Ctrl MO CO	Complete Overlap	h3b2	12.752	444.893	132.804	2425.257	20.647
Ctrl MO CO	Complete Overlap	h3b2	12.752	473.273	141.751	2675.987	20.647
Ctrl MO CO	Complete Overlap	h3b2	12.752	465.456	147.84	1475.486	20.647
Ctrl MO CO	Complete Overlap	h3b2	12.752	407.699	157.372	2398.219	20.647
Ctrl MO CO	Complete Overlap	h3b2	12.752	379.608	143.829	3750.334	20.647
Ctrl MO CO	Complete Overlap
Ctrl MO CO	Complete Overlap	h3b3	6.7	181.02	0	431.156	10.807
Ctrl MO CO	Complete Overlap	h3b3	6.7	210.474	0	549.15	10.807
Ctrl MO CO	Complete Overlap	h3b3	6.7	242.727	0	729.867	10.807
Ctrl MO CO	Complete Overlap	h3b3	6.7	277.213	0	888.859	10.807
Ctrl MO CO	Complete Overlap	h3b3	6.7	315.998	0	910.851	10.807
Ctrl MO CO	Complete Overlap	h3b3	6.7	386.258	0	784.625	10.807
Ctrl MO CO	Complete Overlap	h3b3	6.7	438.55	0	1007.779	10.807
Ctrl MO CO	Complete Overlap
Ctrl MO CO	Complete Overlap	h3b4	9.24	195.672	104.656	545.406	14.936
Ctrl MO CO	Complete Overlap	h3b4	9.24	224.553	110.633	921.063	14.936
Ctrl MO CO	Complete Overlap	h3b4	9.24	251.228	111.245	1323.213	14.936
Ctrl MO CO	Complete Overlap	h3b4	9.24	289.586	132.026	1458.46	14.936
Ctrl MO CO	Complete Overlap	h3b4	9.24	330.847	130.378	1310.661	14.936
Ctrl MO CO	Complete Overlap	h3b4	9.24	407.398	134.11	1404.719	14.936
Ctrl MO CO	Complete Overlap	h3b4	9.24	425.552	141.731	1438.098	14.936
Ctrl MO CO	Complete Overlap	h3b4	9.24	367.584	158.992	2672.491	14.936
Ctrl MO CO	Complete Overlap
Ctrl MO CO	Complete Overlap	h3b5	9.294	210.978	104.857	582.797	15.024
Ctrl MO CO	Complete Overlap	h3b5	9.294	227.028	99.832	720.879	15.024
Ctrl MO CO	Complete Overlap	h3b5	9.294	281.818	105.76	1288.344	15.024
Ctrl MO CO	Complete Overlap	h3b5	9.294	320.456	110.157	1399.297	15.024
Ctrl MO CO	Complete Overlap	h3b5	9.294	320.006	110.828	1539.837	15.024
Ctrl MO CO	Complete Overlap	h3b5	9.294	309.037	106.594	1544.762	15.024
Ctrl MO CO	Complete Overlap	h3b5	9.294	293.561	116.177	1486.06	15.024
Ctrl MO CO	Complete Overlap	h3b5	9.294	289.257	131.318	1403.438	15.024
Ctrl MO CO	Complete Overlap	h3b5	9.294	307.476	123.667	1322.383	15.024
Ctrl MO CO	Complete Overlap	h4b1	9.942	379.984	115.352	2397	16.078
Ctrl MO CO	Complete Overlap	h4b1	9.942	400.375	121.91	2835.703	16.078
Ctrl MO CO	Complete Overlap	h4b1	9.942	435.668	127.145	2966.002	16.078
Ctrl MO CO	Complete Overlap	h4b1	9.942	500.172	146.137	3259.777	16.078
Ctrl MO CO	Complete Overlap	h4b1	9.942	579.973	161.773	3335.616	16.078
Ctrl MO CO	Complete Overlap	h4b1	9.942	635.464	177.521	2101.98	16.078
Ctrl MO CO	Complete Overlap	h4b1	9.942	631.324	148.612	1787.546	16.078
Ctrl MO CO	Complete Overlap
Ctrl MO CO	Complete Overlap	h4b2	8.537	490.631	149.302	1803.004	13.794
Ctrl MO CO	Complete Overlap	h4b2	8.537	564.618	169.905	2469.496	13.794
Ctrl MO CO	Complete Overlap	h4b2	8.537	638.098	187.525	3155.381	13.794
Ctrl MO CO	Complete Overlap	h4b2	8.537	689.117	184.982	3635.821	13.794
Ctrl MO CO	Complete Overlap	h4b2	8.537	727.772	209.782	2928.532	13.794
Ctrl MO CO	Complete Overlap	h4b2	8.537	832.217	232.48	2472.492	13.794
Ctrl MO CO	Complete Overlap	h4b2	8.537	915.089	250.598	4095	13.794
Ctrl MO CO	Complete Overlap
Ctrl MO CO	Complete Overlap	h4b3	8.7	276.945	104.493	1586.61	14.033
Ctrl MO CO	Complete Overlap	h4b3	8.7	289.461	111.542	2223.383	14.033
Ctrl MO CO	Complete Overlap	h4b3	8.7	288.411	118.54	2937.926	14.033
Ctrl MO CO	Complete Overlap	h4b3	8.7	301.237	112.483	2976.237	14.033
Ctrl MO CO	Complete Overlap	h4b3	8.7	327.806	115.804	2212.12	14.033
Ctrl MO CO	Complete Overlap
Ctrl MO CO	Complete Overlap	h4b4	7.673	474.871	142.173	1230.963	12.388
Ctrl MO CO	Complete Overlap	h4b4	7.673	543.064	172.878	1566.551	12.388
Ctrl MO CO	Complete Overlap	h4b4	7.673	582.092	186.646	1828.618	12.388
Ctrl MO CO	Complete Overlap	h4b4	7.673	565.367	213.938	1725.286	12.388
Ctrl MO CO	Complete Overlap	h4b4	7.673	508.73	181.515	1286.921	12.388
Ctrl MO CO	Complete Overlap	h4b4	7.673	580.375	201.516	1797.804	12.388
Ctrl MO CO	Complete Overlap	h4b4	7.673	683.344	208.089	3148.638	12.388
Ctrl MO CO	Complete Overlap
Ctrl MO CO	Complete Overlap	h4b5	3.458	543.03	123.824	2155.498	5.535
Ctrl MO CO	Complete Overlap	h4b5	3.458	554.658	158.552	2696.351	5.535
Ctrl MO CO	Complete Overlap	h4b5	3.458	581.038	183.007	2456.856	5.535
Ctrl MO CO	Complete Overlap	h4b5	3.458	622.1	188.868	1560.371	5.535
Ctrl MO CO	Complete Overlap	h4b5	3.458	677.977	197.934	1725.837	5.535
Ctrl MO CO	Complete Overlap	h4b5	3.458	560.847	227.297	1229.48	5.535
Ctrl MO CO	Complete Overlap	h4b5	3.458	374.113	221.268	1019.379	5.535
Ctrl MO CO	Complete Overlap
Ctrl MO CO	Complete Overlap	h4b6	8.429	294.542	107.403	1111.785	13.618
Ctrl MO CO	Complete Overlap	h4b6	8.429	276.993	109.698	811.767	13.618
Ctrl MO CO	Complete Overlap	h4b6	8.429	255.495	98.657	1288.466	13.618
Ctrl MO CO	Complete Overlap	h4b6	8.754	582.544	149.344	2426.079	14.145
Ctrl MO CO	Complete Overlap	h4b6	8.754	671.094	193.041	2033.617	14.145
Ctrl MO CO	Complete Overlap	h4b6	8.754	746.441	121.492	1999.618	14.145
Ctrl MO CO	Complete Overlap	h4b6	8.754	724.966	173.855	1856.788	14.145
Ctrl MO CO	Complete Overlap	h4b6	8.754	574.31	177.416	2027.483	14.145
Ctrl MO CO	Complete Overlap
Ctrl MO CO	Complete Overlap	h4b7	5.944	267.608	117.903	965.073	9.577
Ctrl MO CO	Complete Overlap	h4b7	5.944	266.289	122.58	1156.967	9.577
Ctrl MO CO	Complete Overlap	h4b7	5.944	285.53	125.796	1165.881	9.577
Ctrl MO CO	Complete Overlap	h4b7	4.917	690.939	214.027	1749.831	7.907
Ctrl MO CO	Complete Overlap	h4b7	4.917	762.611	198.161	2078.468	7.907
Ctrl MO CO	Complete Overlap	h4b7	4.917	583.522	230.882	1901.584	7.907
Ctrl MO CO	Complete Overlap	h5b1	8.97	296.906	111.205	982.565	14.497
Ctrl MO CO	Complete Overlap	h5b1	8.97	332.782	119.766	1777.531	14.497
Ctrl MO CO	Complete Overlap	h5b1	8.97	312.654	112.236	1799.613	14.497
Ctrl MO CO	Complete Overlap	h5b1	8.97	314.391	133.692	1396.957	14.497
Ctrl MO CO	Complete Overlap	h5b1	8.97	346.338	111.204	1002.192	14.497
Ctrl MO CO	Complete Overlap	h5b1	8.97	386.429	105.905	1263.062	14.497
Ctrl MO CO	Complete Overlap	h5b1	8.97	444.67	103.357	1943.138	14.497
Ctrl MO CO	Complete Overlap	h6b1	11.023	356.384	116.305	931.651	17.835
Ctrl MO CO	Complete Overlap	h6b1	11.023	412.937	109.414	1058.07	17.835
Ctrl MO CO	Complete Overlap	h6b1	11.023	407.074	140.272	1030.773	17.835
Ctrl MO CO	Complete Overlap	h6b1	11.023	376.893	132.426	984.538	17.835
Ctrl MO CO	Complete Overlap	h6b1	11.023	375.915	118.449	925.012	17.835
Ctrl MO CO	Complete Overlap	h6b1	11.023	393.123	152.98	1019.089	17.835
Ctrl MO CO	Complete Overlap	h6b1	11.023	418.453	172.898	1695.696	17.835
Ctrl MO CO	Complete Overlap	h6b1	11.023	479.949	184.35	3962.342	17.835
Ctrl MO CO	Complete Overlap	h6b1	11.023	500.782	147.352	3798.574	17.835
Ctrl MO CO	Complete Overlap	h6b1	11.023	459.942	152.44	3680.309	17.835
Ctrl MO CO	Complete Overlap
Ctrl MO CO	Complete Overlap	h6b2	1.459	294.655	127.032	546.306	2.284
Ctrl MO CO	Complete Overlap	h6b2	1.459	357.195	119.959	888.749	2.284
Ctrl MO CO	Complete Overlap	h6b2	1.459	352.46	139.989	994.819	2.284
Ctrl MO CO	Complete Overlap	h6b2	1.459	311.949	142.698	1027.204	2.284
Ctrl MO CO	Complete Overlap	h6b2	1.945	501.808	190.627	1100.49	3.075
Ctrl MO CO	Complete Overlap	h6b2	1.945	611.471	327.363	1693.703	3.075
Ctrl MO CO	Complete Overlap	h6b2	1.945	738.385	352.586	2873.021	3.075
Ctrl MO CO	Complete Overlap	h6b2	1.945	823.873	313.365	2738.383	3.075
Ctrl MO CO	Complete Overlap	h6b2	1.945	660.998	291.503	1768.889	3.075
Ctrl MO CO	Complete Overlap
Ctrl MO CO	Complete Overlap	h6b3	6.214	372.285	125.32	1111.035	10.016
Ctrl MO CO	Complete Overlap	h6b3	6.214	365.533	132.342	1072.461	10.016
Ctrl MO CO	Complete Overlap	h6b3	6.214	281.108	112.302	923.84	10.016
Ctrl MO CO	Complete Overlap	h6b3	5.62	390.16	150.158	952.147	9.049
Ctrl MO CO	Complete Overlap	h6b3	5.62	547.212	194.934	1611.909	9.049
Ctrl MO CO	Complete Overlap	h6b3	5.62	604.202	209.696	2213.991	9.049
Ctrl MO CO	Complete Overlap	h6b3	5.62	637.498	196.61	2850.763	9.049
Ctrl MO CO	Complete Overlap	h6b3	5.62	671.884	188.697	2109.351	9.049
Ctrl MO CO	Complete Overlap	h6b3	5.62	636.635	215.835	1970.17	9.049
Ctrl MO CO	Complete Overlap	h7b1	12.806	209.926	106.259	594.383	20.735
Ctrl MO CO	Complete Overlap	h7b1	12.806	232.097	103.516	737.126	20.735
Ctrl MO CO	Complete Overlap	h7b1	12.806	249.589	102.109	805.109	20.735
Ctrl MO CO	Complete Overlap	h7b1	12.806	261.441	109.543	881.707	20.735
Ctrl MO CO	Complete Overlap	h7b1	12.806	280.761	108.027	904.416	20.735
Ctrl MO CO	Complete Overlap	h7b1	12.806	295.878	110.631	874.425	20.735
Ctrl MO CO	Complete Overlap	h7b1	12.806	313.853	104.354	874.962	20.735
Ctrl MO CO	Complete Overlap	h7b1	12.806	332.093	115.349	990.927	20.735
Ctrl MO CO	Complete Overlap	h7b1	12.806	340.579	126.257	1237.643	20.735
Ctrl MO CO	Complete Overlap
Ctrl MO CO	Complete Overlap	h8b1	8.321	223.434	108.913	444.522	13.442
Ctrl MO CO	Complete Overlap	h8b1	8.321	307.552	118.273	893.605	13.442
Ctrl MO CO	Complete Overlap	h8b1	8.321	365.425	124.837	1619.934	13.442
Ctrl MO CO	Complete Overlap	h8b1	8.321	367.575	139.017	1543.052	13.442
Ctrl MO CO	Complete Overlap	h8b1	8.321	369.802	140.154	1313.109	13.442
Ctrl MO CO	Complete Overlap	h8b1	8.321	366.202	140.058	1352.159	13.442
Ctrl MO CO	Complete Overlap	h8b1	8.321	357.292	137.353	1033.939	13.442
Ctrl MO CO	Complete Overlap	h8b1	8.321	356.493	151.473	974.631	13.442
Ctrl MO CO	Complete Overlap	h8b1	8.321	364.596	133.16	1086.132	13.442
Ctrl MO CO	Complete Overlap
Ctrl MO CO	Complete Overlap	h8b2	7.889	218.671	102.395	525.107	12.74
Ctrl MO CO	Complete Overlap	h8b2	7.889	289.51	111.408	858.366	12.74
Ctrl MO CO	Complete Overlap	h8b2	7.889	334.317	118.195	1064.025	12.74
Ctrl MO CO	Complete Overlap	h8b2	7.889	335.152	124.023	1074.369	12.74
Ctrl MO CO	Complete Overlap	h8b2	7.889	330.673	135.336	870.978	12.74
Ctrl MO CO	Complete Overlap	h8b2	7.889	332.219	137.319	1106.231	12.74
Ctrl MO CO	Complete Overlap	h8b2	7.889	330.961	136.628	1035.229	12.74
Ctrl MO CO	Complete Overlap
Ctrl MO CO	Complete Overlap	h8b3	10.375	166.989	97.103	558.947	16.781
Ctrl MO CO	Complete Overlap	h8b3	10.375	202.69	100.355	731.573	16.781
Ctrl MO CO	Complete Overlap	h8b3	10.375	234.604	102.454	1205.408	16.781
Ctrl MO CO	Complete Overlap	h8b3	10.375	235.15	103.235	1344.896	16.781
Ctrl MO CO	Complete Overlap	h8b3	10.375	218.126	102.433	1077.509	16.781
Ctrl MO CO	Complete Overlap	h8b3	10.375	215.59	104.483	972.081	16.781
Ctrl MO CO	Complete Overlap	h8b3	10.375	225.996	106.29	1222.175	16.781
Ctrl MO PO	Partial Overlap	h1b1	12.914	270.612	105.263	726.72	20.91
Ctrl MO PO	Partial Overlap	h1b1	12.914	309.617	106.244	871.77	20.91
Ctrl MO PO	Partial Overlap	h1b1	12.914	317.695	116.223	840.557	20.91
Ctrl MO PO	Partial Overlap	h1b1	12.914	306.689	119.774	967.444	20.91
Ctrl MO PO	Partial Overlap	h1b1	12.914	300.459	127.577	1358.668	20.91
Ctrl MO PO	Partial Overlap	h1b1	12.914	285.222	97.534	851.556	20.91
Ctrl MO PO	Partial Overlap	h1b1	12.914	268.662	108.078	843.754	20.91
Ctrl MO PO	Partial Overlap	h1b1	12.914	254.592	107.807	826.274	20.91
Ctrl MO PO	Partial Overlap	h1b1	12.914	233.782	103.004	759.673	20.91
Ctrl MO PO	Partial Overlap	h1b1	12.914	208.764	106.026	665.133	20.91
Ctrl MO PO	Partial Overlap	h1b1	12.914	190.551	103.377	563.102	20.91
Ctrl MO PO	Partial Overlap
Ctrl MO PO	Partial Overlap	h1b2	9.186	295.127	111.84	772.347	14.848
Ctrl MO PO	Partial Overlap	h1b2	9.186	303.89	118.689	1038.71	14.848
Ctrl MO PO	Partial Overlap	h1b2	9.186	288.282	107.064	1061.733	14.848
Ctrl MO PO	Partial Overlap	h1b2	9.186	258.923	109.84	985.102	14.848
Ctrl MO PO	Partial Overlap	h1b2	9.186	255.362	109.001	926.784	14.848
Ctrl MO PO	Partial Overlap	h1b2	9.186	259.27	114.303	975.271	14.848
Ctrl MO PO	Partial Overlap	h1b2	9.186	268.423	119.176	959.273	14.848
Ctrl MO PO	Partial Overlap	h1b2	9.186	282.554	117.157	1131.152	14.848
Ctrl MO PO	Partial Overlap	h1b2	9.186	314.272	113.173	1160.357	14.848
Ctrl MO PO	Partial Overlap	h1b2	9.186	335.225	114.112	1185.77	14.848
Ctrl MO PO	Partial Overlap	h1b2	9.186	350.164	123.156	1403.315	14.848
Ctrl MO PO	Partial Overlap	h1b2	9.186	360.794	130.22	2095.235	14.848
Ctrl MO PO	Partial Overlap	h1b2	9.186	360.639	117.884	1533.196	14.848
Ctrl MO PO	Partial Overlap
Ctrl MO PO	Partial Overlap	h2b1	5.674	364.066	148.04	1033.916	9.137
Ctrl MO PO	Partial Overlap	h2b1	5.674	357.449	147.162	945.718	9.137
Ctrl MO PO	Partial Overlap	h2b1	5.674	348.955	139.033	782.508	9.137
Ctrl MO PO	Partial Overlap	h2b1	5.674	359.411	166.704	858.484	9.137
Ctrl MO PO	Partial Overlap	h2b1	5.674	360.577	155.436	930.236	9.137
Ctrl MO PO	Partial Overlap	h2b1	5.674	366.127	151.485	1328.589	9.137
Ctrl MO PO	Partial Overlap
Ctrl MO PO	Partial Overlap	h2b2	3.458	326.065	112.65	1459.973	5.535
Ctrl MO PO	Partial Overlap	h2b2	3.458	370.054	136.096	1572.463	5.535
Ctrl MO PO	Partial Overlap	h2b2	3.458	367.142	148.378	1475.205	5.535
Ctrl MO PO	Partial Overlap	h2b2	3.458	336.808	121.063	1336.317	5.535
Ctrl MO PO	Partial Overlap	h2b2	3.458	314.126	114.343	1140.086	5.535
Ctrl MO PO	Partial Overlap	h2b2	3.458	316.663	120.496	1228.216	5.535
Ctrl MO PO	Partial Overlap	h2b2	3.458	325.363	130.021	1261.511	5.535
Ctrl MO PO	Partial Overlap	h2b2	3.458	333.501	137.274	852.919	5.535
Ctrl MO PO	Partial Overlap	h2b2	3.458	360.449	139.218	780.847	5.535
Ctrl MO PO	Partial Overlap	h2b2	3.458	372.679	152.843	740.74	5.535
Ctrl MO PO	Partial Overlap	h2b2	3.458	359.879	145.259	634.253	5.535
Ctrl MO PO	Partial Overlap	h3b1	10.429	230.698	104.164	705.238	16.869
Ctrl MO PO	Partial Overlap	h3b1	10.429	254.802	107.679	751.697	16.869
Ctrl MO PO	Partial Overlap	h3b1	10.429	294.6	103.068	1445.961	16.869
Ctrl MO PO	Partial Overlap	h3b1	10.429	286.979	126.217	1368.553	16.869
Ctrl MO PO	Partial Overlap	h3b1	10.429	286.876	116.233	1186.158	16.869
Ctrl MO PO	Partial Overlap	h3b1	10.375	480.178	119.005	1572.572	16.781
Ctrl MO PO	Partial Overlap	h3b1	10.375	568.769	135.299	2223.788	16.781
Ctrl MO PO	Partial Overlap	h3b1	10.375	563.791	147.577	2487.583	16.781
Ctrl MO PO	Partial Overlap
Ctrl MO PO	Partial Overlap	h3b2	6.592	279.784	103.616	942.363	10.631
Ctrl MO PO	Partial Overlap	h3b2	6.592	347.485	110.721	1444.772	10.631
Ctrl MO PO	Partial Overlap	h3b2	6.592	406.679	105.852	1741.793	10.631
Ctrl MO PO	Partial Overlap	h3b2	6.592	460.016	112.89	1824.15	10.631
Ctrl MO PO	Partial Overlap	h3b2	6.592	519.71	124.439	1713.162	10.631
Ctrl MO PO	Partial Overlap	h3b2	6.592	603.402	139.535	1727.973	10.631
Ctrl MO PO	Partial Overlap	h3b2	6.592	576.234	139.011	1934.93	10.631
Ctrl MO PO	Partial Overlap
Ctrl MO PO	Partial Overlap	h3b3	7.511	233.645	104.04	880.277	12.125
Ctrl MO PO	Partial Overlap	h3b3	7.511	287.882	107.606	1489.444	12.125
Ctrl MO PO	Partial Overlap	h3b3	7.511	319.432	103.152	2174.602	12.125
Ctrl MO PO	Partial Overlap	h3b3	7.511	338.219	118.155	1644.173	12.125
Ctrl MO PO	Partial Overlap	h3b3	7.511	353.863	135.286	1573.21	12.125
Ctrl MO PO	Partial Overlap	h3b3	7.511	377.476	133.676	1585.98	12.125
Ctrl MO PO	Partial Overlap	h3b3	7.511	399.002	150.826	1326.278	12.125
Ctrl MO PO	Partial Overlap	h3b3	7.511	395.56	143.021	1206.55	12.125
Ctrl MO PO	Partial Overlap
Ctrl MO PO	Partial Overlap	h4b1	8.808	415.513	135.205	1186.878	14.233
Ctrl MO PO	Partial Overlap	h4b1	8.808	439.537	146.45	1130.962	14.233
Ctrl MO PO	Partial Overlap	h4b1	8.808	529.428	170.027	1859.46	14.233
Ctrl MO PO	Partial Overlap	h4b1	8.808	627.532	198.649	1716.72	14.233
Ctrl MO PO	Partial Overlap	h4b1	8.808	542.566	208.491	1502.718	14.233
Ctrl MO PO	Partial Overlap	h4b1	8.808	363.927	159.889	1171.92	14.233
Ctrl MO PO	Partial Overlap
Ctrl MO PO	Partial Overlap	h4b2	6.754	396.089	133.026	973.381	10.894
Ctrl MO PO	Partial Overlap	h4b2	6.754	397.264	147.436	1102.494	10.894
Ctrl MO PO	Partial Overlap	h4b2	6.754	379.913	152.22	826.495	10.894
Ctrl MO PO	Partial Overlap	h4b2	6.754	446.152	175.703	1247.49	10.894
Ctrl MO PO	Partial Overlap	h4b2	6.754	482.781	175.639	1569.816	10.894
Ctrl MO PO	Partial Overlap	h4b2	6.754	374.774	174.107	939.348	10.894
Ctrl MO PO	Partial Overlap	h4b2	6.754	265.016	140.889	1143.433	10.894
Ctrl MO PO	Partial Overlap
Ctrl MO PO	Partial Overlap	h4b3	8.375	332.537	123.439	792.464	13.53
Ctrl MO PO	Partial Overlap	h4b3	8.375	327.017	133.777	1371.805	13.53
Ctrl MO PO	Partial Overlap	h4b3	8.375	329.031	133.604	1977.436	13.53
Ctrl MO PO	Partial Overlap	h4b3	8.375	358.717	119.893	1687.33	13.53
Ctrl MO PO	Partial Overlap	h4b3	8.375	400.29	150.882	1247.68	13.53
Ctrl MO PO	Partial Overlap	h4b3	8.375	435.225	159.694	1199.125	13.53
Ctrl MO PO	Partial Overlap	h4b3	8.375	436.018	170.307	1309.295	13.53
Ctrl MO PO	Partial Overlap	h5b2	15.508	226.139	99.062	878.048	25.128
Ctrl MO PO	Partial Overlap	h5b2	15.508	282.694	107.11	1871.956	25.128
Ctrl MO PO	Partial Overlap	h5b2	15.508	307.476	108.06	1984.607	25.128
Ctrl MO PO	Partial Overlap	h5b2	15.508	347.376	122.652	1800.899	25.128
Ctrl MO PO	Partial Overlap	h5b2	15.508	418.745	151.081	3840.731	25.128
Ctrl MO PO	Partial Overlap	h5b2	15.508	448.612	155.588	2570.68	25.128
Ctrl MO PO	Partial Overlap
Ctrl MO PO	Partial Overlap	h5b3	8.7	244.885	106.619	834.76	14.057
Ctrl MO PO	Partial Overlap	h5b3	8.7	297.178	124.176	1032.732	14.057
Ctrl MO PO	Partial Overlap	h5b3	8.7	344.318	139.434	1113.333	14.057
Ctrl MO PO	Partial Overlap	h5b3	8.7	438.36	147.242	1658.257	14.057
Ctrl MO PO	Partial Overlap	h5b3	8.7	563.502	152.514	3502.36	14.057
Ctrl MO PO	Partial Overlap
Ctrl MO PO	Partial Overlap	h5b4	11.942	247.68	100.456	890.453	19.329
Ctrl MO PO	Partial Overlap	h5b4	11.942	283.711	109.365	955.88	19.329
Ctrl MO PO	Partial Overlap	h5b4	11.942	328.624	115.571	1353.654	19.329
Ctrl MO PO	Partial Overlap	h5b4	11.942	380.496	117.477	1411.321	19.329
Ctrl MO PO	Partial Overlap	h5b4	11.942	414.437	129.436	1739.125	19.329
Ctrl MO PO	Partial Overlap	h5b4	11.942	436.88	131.661	1993.232	19.329
Ctrl MO PO	Partial Overlap	h6b1	10.699	281.159	122.35	696.776	17.308
Ctrl MO PO	Partial Overlap	h6b1	10.699	292.979	106.134	838.534	17.308
Ctrl MO PO	Partial Overlap	h6b1	10.699	283.124	115.22	841.666	17.308
Ctrl MO PO	Partial Overlap	h6b1	11.347	319.051	127.32	1058.02	18.362
Ctrl MO PO	Partial Overlap	h6b1	11.347	383.97	127.036	1081.961	18.362
Ctrl MO PO	Partial Overlap	h6b1	11.347	476.244	157.385	1604.989	18.362
Ctrl MO PO	Partial Overlap	h6b1	11.347	586.277	158.425	2226.569	18.362
Ctrl MO PO	Partial Overlap	h6b1	11.347	569.204	164.951	2215.599	18.362
Ctrl MO PO	Partial Overlap
Ctrl MO PO	Partial Overlap	h6b2	9.348	324.107	108.879	2467.982	15.101
Ctrl MO PO	Partial Overlap	h6b2	9.348	392.067	131.396	1932.011	15.101
Ctrl MO PO	Partial Overlap	h6b2	9.348	440.538	128.726	1954.689	15.101
Ctrl MO PO	Partial Overlap	h6b2	9.348	449.419	137.383	1187.28	15.101
Ctrl MO PO	Partial Overlap	h6b2	9.348	438.138	129.301	1174.023	15.101
Ctrl MO PO	Partial Overlap	h6b2	9.348	436.957	115.199	1289.358	15.101
Ctrl MO PO	Partial Overlap	h6b2	9.348	438.292	118.394	2179.596	15.101
Ctrl MO PO	Partial Overlap
Ctrl MO PO	Partial Overlap	h6b3	14.427	207.912	96.315	744.346	23.37
Ctrl MO PO	Partial Overlap	h6b3	14.427	227.67	104.692	731.803	23.37
Ctrl MO PO	Partial Overlap	h6b3	14.265	379.213	111.395	1614.219	23.107
Ctrl MO PO	Partial Overlap	h6b3	14.265	354.646	113.319	2531.104	23.107
Ctrl MO PO	Partial Overlap	h6b3	14.265	359.696	113.589	1983.559	23.107
Ctrl MO PO	Partial Overlap	h6b3	14.265	392.572	112.984	2995.241	23.107
Ctrl MO PO	Partial Overlap	h6b3	13.941	601.945	157.18	2581.025	22.58
Ctrl MO PO	Partial Overlap	h6b3	13.941	562.66	176.982	2934.188	22.58
Ctrl MO PO	Partial Overlap	h6b3	13.941	488.219	122.252	1649.699	22.58
Ctrl MO PO	Partial Overlap
Ctrl MO PO	Partial Overlap	h6b4	7.673	241.816	92.799	908.259	12.388
Ctrl MO PO	Partial Overlap	h6b4	7.673	288.684	108.116	1018.05	12.388
Ctrl MO PO	Partial Overlap	h6b4	7.673	337.255	104.731	995.779	12.388
Ctrl MO PO	Partial Overlap	h6b4	7.673	360.457	115.678	1259.473	12.388
Ctrl MO PO	Partial Overlap	h6b4	7.673	323.557	116.666	794.397	12.388
Ctrl MO PO	Partial Overlap	h6b4	7.673	278.51	125.472	725.758	12.388
Ctrl MO PO	Partial Overlap	h6b4	7.673	236.593	111.104	531.38	12.388
Ctrl MO PO	Partial Overlap	h6b4	7.673	208.652	107.168	478.315	12.388
Ctrl MO PO	Partial Overlap
Ctrl MO PO	Partial Overlap	h7b1	9.78	183.416	102.808	419.582	15.815
Ctrl MO PO	Partial Overlap	h7b1	9.78	191.714	105.265	443.166	15.815
Ctrl MO PO	Partial Overlap	h7b1	9.78	199.659	105.554	550.505	15.815
Ctrl MO PO	Partial Overlap	h7b1	9.78	201.82	107.22	571.091	15.815
Ctrl MO PO	Partial Overlap	h7b1	9.78	214.151	112.312	640.504	15.815
Ctrl MO PO	Partial Overlap	h7b1	9.78	216.454	112.134	593.111	15.815
Ctrl MO PO	Partial Overlap	h7b1	9.78	234.592	118.833	760.701	15.815
Ctrl MO PO	Partial Overlap	h7b1	9.78	249.934	122.471	638.04	15.815
Ctrl MO PO	Partial Overlap	h7b1	9.78	267.798	120.19	1111.481	15.815
Ctrl MO PO	Partial Overlap	h7b1	9.78	313.337	125.838	1612.9	15.815
Ctrl MO PO	Partial Overlap	h7b1	9.78	352.64	135.211	1829.235	15.815
Ctrl MO PO	Partial Overlap
Ctrl MO PO	Partial Overlap	h7b2	2.215	246.237	129.345	747.333	3.511
Ctrl MO PO	Partial Overlap	h7b2	2.215	278.792	130.792	1025.046	3.511
Ctrl MO PO	Partial Overlap	h7b2	2.215	285.756	125.071	972.766	3.511
Ctrl MO PO	Partial Overlap	h7b2	2.215	281.311	110.723	832.31	3.511
Ctrl MO PO	Partial Overlap	h7b2	2.215	270.27	125.224	717.754	3.511
Ctrl MO PO	Partial Overlap	h7b2	2.215	265.502	128.164	696.113	3.511
Ctrl MO PO	Partial Overlap
Ctrl MO PO	Partial Overlap	h7b3	8.105	215.323	103.907	712.859	13.091
Ctrl MO PO	Partial Overlap	h7b3	8.105	233.73	103.664	979.58	13.091
Ctrl MO PO	Partial Overlap	h7b3	8.105	242.255	117.001	950.342	13.091
Ctrl MO PO	Partial Overlap	h7b3	8.105	256.836	115.472	825.175	13.091
Ctrl MO PO	Partial Overlap	h7b3	8.105	265.124	122.008	906.488	13.091
Ctrl MO PO	Partial Overlap	h7b3	8.105	280.909	119.21	801.766	13.091
Ctrl MO PO	Partial Overlap	h7b3	8.105	299.315	121.297	988.435	13.091
Ctrl MO PO	Partial Overlap	h7b3	8.105	298.116	124.893	731.466	13.091
Ctrl MO PO	Partial Overlap	h7b3	8.105	310.147	133.266	783.066	13.091
Ctrl MO PO	Partial Overlap	h7b3	8.105	321.923	124.227	805.405	13.091
Ctrl MO PO	Partial Overlap
Ctrl MO PO	Partial Overlap	h7b4	9.348	291.336	122.007	1222.686	15.112
Ctrl MO PO	Partial Overlap	h7b4	9.348	314.896	130.022	1145.374	15.112
Ctrl MO PO	Partial Overlap	h7b4	9.348	334.62	132.205	1023.706	15.112
Ctrl MO PO	Partial Overlap	h7b4	9.348	357.189	134.965	906.803	15.112
Ctrl MO PO	Partial Overlap	h7b4	9.348	384.279	145.916	976.788	15.112
Ctrl MO PO	Partial Overlap	h7b4	9.348	391.667	144.317	1011.485	15.112
Ctrl MO PO	Partial Overlap	h7b4	9.348	411.026	142.67	1317.266	15.112
Ctrl MO PO	Partial Overlap
Ctrl MO PO	Partial Overlap	h8b1	8.862	163.835	103.219	440.52	14.321
Ctrl MO PO	Partial Overlap	h8b1	8.862	199.924	102.137	719.758	14.321
Ctrl MO PO	Partial Overlap	h8b1	8.862	234.562	107.386	1054.755	14.321
Ctrl MO PO	Partial Overlap	h8b1	8.862	248.535	105.46	975.793	14.321
Ctrl MO PO	Partial Overlap	h8b1	8.862	256.482	117.527	978.407	14.321
Ctrl MO PO	Partial Overlap	h8b1	8.862	297.893	131.435	848.909	14.321
Ctrl MO PO	Partial Overlap	h8b1	8.862	328.095	138.039	907.941	14.321
Ctrl MO PO	Partial Overlap	h8b1	8.862	339.158	136.334	1028.938	14.321
Ctrl MO PO	Partial Overlap	h8b1	8.862	332.76	137.753	1091.879	14.321
Ctrl MO PO	Partial Overlap
Ctrl MO PO	Partial Overlap	h8b2	8.213	266.728	103.79	812.401	13.267
Ctrl MO PO	Partial Overlap	h8b2	8.213	302.602	121.459	1453.015	13.267
Ctrl MO PO	Partial Overlap	h8b2	8.213	301.416	122.215	1136.931	13.267
Ctrl MO PO	Partial Overlap	h8b2	8.213	307.154	134.548	962.161	13.267
Ctrl MO PO	Partial Overlap	h8b2	8.213	326.16	127.139	822.072	13.267
Ctrl MO PO	Partial Overlap	h8b2	8.213	364.842	132.173	985.843	13.267
Ctrl MO PO	Partial Overlap	h8b2	8.213	438.876	159.473	1261.332	13.267
Ctrl MO PO	Partial Overlap	h8b2	8.213	484.391	161.288	1542.276	13.267
Ctrl MO PO	Partial Overlap	h8b2	8.213	449.526	145.301	1791.756	13.267
Ctrl MO PO	Partial Overlap
Ctrl MO PO	Partial Overlap	h8b3	8.916	199.419	98.394	742.833	14.398
Ctrl MO PO	Partial Overlap	h8b3	8.916	258.9	102.792	1429.636	14.398
Ctrl MO PO	Partial Overlap	h8b3	8.916	303.756	110.593	1741.403	14.398
Ctrl MO PO	Partial Overlap	h8b3	8.916	318.082	107.122	1720.45	14.398
Ctrl MO PO	Partial Overlap	h8b3	8.916	347.684	117.483	1896.237	14.398
Ctrl MO PO	Partial Overlap	h8b3	8.916	355.318	122.264	1602.384	14.398
Ctrl MO PO	Partial Overlap	h8b3	8.916	344.478	140.452	1131.395	14.398
Ctrl MO PO	Partial Overlap	h8b3	8.916	359.323	138.245	1322.831	14.398
Ctrl MO NO	No Overlap	h1b1	4.215	216.113	97.8	460.529	6.765
Ctrl MO NO	No Overlap	h1b1	4.215	212.603	101.551	517.966	6.765
Ctrl MO NO	No Overlap	h1b1	4.215	197.297	101.149	511.234	6.765
Ctrl MO NO	No Overlap	h1b1	4.215	199.822	99.225	444.315	6.765
Ctrl MO NO	No Overlap	h1b1	4.215	203.439	100.202	476.159	6.765
Ctrl MO NO	No Overlap	h1b1	4.215	214.79	100.46	529.56	6.765
Ctrl MO NO	No Overlap	h1b1	4.215	226.799	99.122	698.611	6.765
Ctrl MO NO	No Overlap	h1b1	4.215	251.162	100.063	780.211	6.765
Ctrl MO NO	No Overlap
Ctrl MO NO	No Overlap	h1b2	10.321	221.272	100.544	647.624	16.693
Ctrl MO NO	No Overlap	h1b2	10.321	248.058	103.395	836.533	16.693
Ctrl MO NO	No Overlap	h1b2	10.321	262.384	106.589	1042.967	16.693
Ctrl MO NO	No Overlap	h1b2	10.321	273.534	106.417	1385.735	16.693
Ctrl MO NO	No Overlap	h1b2	10.321	272.216	107.19	1275.692	16.693
Ctrl MO NO	No Overlap	h1b2	10.321	269.19	112.43	1086.735	16.693
Ctrl MO NO	No Overlap	h1b2	10.321	267.415	106.37	1020.918	16.693
Ctrl MO NO	No Overlap	h1b2	10.321	269.428	113.696	992.768	16.693
Ctrl MO NO	No Overlap	h1b2	10.321	286.225	113.608	1430.521	16.693
Ctrl MO NO	No Overlap	h1b2	10.321	310.781	104.529	1760.161	16.693
Ctrl MO NO	No Overlap	h1b2	10.321	342.981	117.074	2634.215	16.693
Ctrl MO NO	No Overlap	h1b2	10.321	359.473	116.529	3195.488	16.693
Ctrl MO NO	No Overlap
Ctrl MO NO	No Overlap	h1b3	9.294	187.955	101.286	514.716	15.024
Ctrl MO NO	No Overlap	h1b3	9.294	196.26	97.562	561.62	15.024
Ctrl MO NO	No Overlap	h1b3	9.294	197.318	100.966	559.736	15.024
Ctrl MO NO	No Overlap	h1b3	9.294	199.229	105.313	693.035	15.024
Ctrl MO NO	No Overlap	h1b3	9.294	196.061	101.773	709.014	15.024
Ctrl MO NO	No Overlap	h1b3	9.294	192.427	104.517	629.208	15.024
Ctrl MO NO	No Overlap	h1b3	9.294	185.546	101.738	576.842	15.024
Ctrl MO NO	No Overlap	h1b3	9.294	182.528	102.409	766.684	15.024
Ctrl MO NO	No Overlap	h1b3	9.294	179.157	104.194	479.13	15.024
Ctrl MO NO	No Overlap	h1b3	9.294	179.756	100.124	587.826	15.024
Ctrl MO NO	No Overlap	h1b3	9.294	194.221	101.128	620.606	15.024
Ctrl MO NO	No Overlap	h1b3	9.294	209.535	105.732	762.94	15.024
Ctrl MO NO	No Overlap	h1b3	9.294	232.674	105.375	1294.387	15.024
Ctrl MO NO	No Overlap	h1b3	9.294	247.952	106.11	1019.259	15.024
Ctrl MO NO	No Overlap	h1b3	9.294	246.267	106.102	1176.132	15.024
Ctrl MO NO	No Overlap	h1b3	9.294	234.02	102.967	927.748	15.024
Ctrl MO NO	No Overlap
Ctrl MO NO	No Overlap	h1b4	9.186	270.196	111.363	1011.55	14.848
Ctrl MO NO	No Overlap	h1b4	9.186	279.163	113.129	997.249	14.848
Ctrl MO NO	No Overlap	h1b4	9.186	278.401	114.235	1107.72	14.848
Ctrl MO NO	No Overlap	h1b4	9.186	284.005	113.681	1130.74	14.848
Ctrl MO NO	No Overlap	h1b4	9.186	290.631	115.669	1066.453	14.848
Ctrl MO NO	No Overlap	h1b4	9.186	309.608	119.149	1293.797	14.848
Ctrl MO NO	No Overlap	h1b4	9.186	332.792	119.45	1647.737	14.848
Ctrl MO NO	No Overlap	h1b4	9.186	338.215	119.581	1884.708	14.848
Ctrl MO NO	No Overlap	h1b4	9.186	332.515	127.076	2547.036	14.848
Ctrl MO NO	No Overlap	h1b4	9.186	321.362	134.153	2894.343	14.848
Ctrl MO NO	No Overlap	h1b4	9.186	319.815	128.299	1055.287	14.848
Ctrl MO NO	No Overlap
Ctrl MO NO	No Overlap	h1b5	9.564	302.834	111.414	1150.099	15.463
Ctrl MO NO	No Overlap	h1b5	9.564	343.769	120.715	1603.261	15.463
Ctrl MO NO	No Overlap	h1b5	9.564	384.416	133.94	1536.76	15.463
Ctrl MO NO	No Overlap	h1b5	9.564	389.376	149.38	1360.661	15.463
Ctrl MO NO	No Overlap	h1b5	9.564	368.645	124.848	1175.938	15.463
Ctrl MO NO	No Overlap	h1b5	9.564	363.439	143.181	1090.339	15.463
Ctrl MO NO	No Overlap	h1b5	9.564	368.531	130.144	1440.846	15.463
Ctrl MO NO	No Overlap	h1b5	9.564	376.747	130.404	1995.457	15.463
Ctrl MO NO	No Overlap	h1b5	9.564	376.999	143.751	2824.559	15.463
Ctrl MO NO	No Overlap
Ctrl MO NO	No Overlap	h1b6	12.428	337.104	117.95	1358.655	20.12
Ctrl MO NO	No Overlap	h1b6	12.428	387.076	129.033	1900.878	20.12
Ctrl MO NO	No Overlap	h1b6	12.428	425.227	132.991	2354.482	20.12
Ctrl MO NO	No Overlap	h1b6	12.428	439.54	148.122	2185.206	20.12
Ctrl MO NO	No Overlap	h1b6	12.428	449.61	164.315	1829.848	20.12
Ctrl MO NO	No Overlap	h1b6	12.428	438.545	141.124	2166.946	20.12
Ctrl MO NO	No Overlap	h1b6	12.428	416.303	131.955	1464.67	20.12
Ctrl MO NO	No Overlap	h2b1	4.755	303.393	106.784	1265.71	7.644
Ctrl MO NO	No Overlap	h2b1	4.755	323.508	106.857	1317.459	7.644
Ctrl MO NO	No Overlap	h2b1	4.755	306.905	121.751	736.423	7.644
Ctrl MO NO	No Overlap	h2b1	4.755	279.912	128.282	679.966	7.644
Ctrl MO NO	No Overlap	h2b1	4.755	282.286	133.489	703.532	7.644
Ctrl MO NO	No Overlap	h2b1	4.755	296.625	150.615	718.169	7.644
Ctrl MO NO	No Overlap	h2b1	4.755	306.824	154.48	966.75	7.644
Ctrl MO NO	No Overlap	h2b1	4.755	314.383	148.516	917.051	7.644
Ctrl MO NO	No Overlap	h2b1	4.755	301.474	136.108	769.978	7.644
Ctrl MO NO	No Overlap
Ctrl MO NO	No Overlap	h2b2	5.836	299.894	111.158	807.668	9.401
Ctrl MO NO	No Overlap	h2b2	5.836	351.204	111.133	1560.549	9.401
Ctrl MO NO	No Overlap	h2b2	5.836	343.556	125.485	1985.217	9.401
Ctrl MO NO	No Overlap	h2b2	5.836	307.016	123.639	1832.358	9.401
Ctrl MO NO	No Overlap	h2b2	5.944	503.006	176.431	2114.747	9.577
Ctrl MO NO	No Overlap	h2b2	5.944	559.434	176.893	1982.108	9.577
Ctrl MO NO	No Overlap	h2b2	5.944	563.201	170.685	1487.503	9.577
Ctrl MO NO	No Overlap	h2b2	5.944	542.098	146.398	1685.248	9.577
Ctrl MO NO	No Overlap	h2b2	5.944	527.854	159.945	1587.27	9.577
Ctrl MO NO	No Overlap
Ctrl MO NO	No Overlap	h2b3	10.266	321.641	117.199	824.957	16.605
Ctrl MO NO	No Overlap	h2b3	10.266	413.775	120.805	1292.64	16.605
Ctrl MO NO	No Overlap	h2b3	10.266	448.662	129.732	1541.167	16.605
Ctrl MO NO	No Overlap	h2b3	10.266	416.233	132.897	1358.516	16.605
Ctrl MO NO	No Overlap	h2b3	10.266	347.758	139.702	1261.815	16.605
Ctrl MO NO	No Overlap	h2b3	10.266	360.139	136.872	1339.81	16.605
Ctrl MO NO	No Overlap	h2b3	10.266	377.577	143.104	917.579	16.605
Ctrl MO NO	No Overlap	h2b3	10.266	393.477	156.943	1122.842	16.605
Ctrl MO NO	No Overlap
Ctrl MO NO	No Overlap	h2b4	9.51	286.905	122.857	803.939	15.375
Ctrl MO NO	No Overlap	h2b4	9.51	381.107	125.705	1709.829	15.375
Ctrl MO NO	No Overlap	h2b4	9.51	464.441	154.04	2244.678	15.375
Ctrl MO NO	No Overlap	h2b4	9.51	478.259	133.295	2301.642	15.375
Ctrl MO NO	No Overlap	h2b4	9.51	487.773	134.494	2331.342	15.375
Ctrl MO NO	No Overlap	h2b4	9.51	456.969	139.403	2118.552	15.375
Ctrl MO NO	No Overlap	h2b4	9.51	379.516	152.375	1112.381	15.375
Ctrl MO NO	No Overlap	h2b4	9.51	329.914	148.343	1139.66	15.375
Ctrl MO NO	No Overlap
Ctrl MO NO	No Overlap	h2b5	6.862	429.214	160.517	1417.771	11.07
Ctrl MO NO	No Overlap	h2b5	6.862	433.113	151.709	1228.117	11.07
Ctrl MO NO	No Overlap	h2b5	6.862	404.05	136.162	1276.102	11.07
Ctrl MO NO	No Overlap	h2b5	6.862	383.478	118.869	1623.674	11.07
Ctrl MO NO	No Overlap	h2b5	6.862	370.544	114.451	1717.863	11.07
Ctrl MO NO	No Overlap
Ctrl MO NO	No Overlap	h2b6	7.565	244.553	110.391	965.931	12.212
Ctrl MO NO	No Overlap	h2b6	7.565	336.447	111.257	1728.898	12.212
Ctrl MO NO	No Overlap	h2b6	7.565	408.786	134.368	2016.377	12.212
Ctrl MO NO	No Overlap	h2b6	7.565	435.648	120.411	2025.094	12.212
Ctrl MO NO	No Overlap	h2b6	7.565	449.023	146.553	1381.273	12.212
Ctrl MO NO	No Overlap	h2b6	7.565	425.231	139.463	1040.327	12.212
Ctrl MO NO	No Overlap	h2b6	7.565	383.391	154.986	1133.943	12.212
Ctrl MO NO	No Overlap	h2b6	7.565	327.745	123.678	1151.736	12.212
Ctrl MO NO	No Overlap	h3b1	11.023	203.542	101.573	548.633	17.835
Ctrl MO NO	No Overlap	h3b1	11.023	227.338	103.58	642.29	17.835
Ctrl MO NO	No Overlap	h3b1	11.023	291.031	96.713	1275.339	17.835
Ctrl MO NO	No Overlap	h3b1	11.023	335.009	106.813	1568.244	17.835
Ctrl MO NO	No Overlap	h3b1	11.023	355.539	113.093	1990.142	17.835
Ctrl MO NO	No Overlap	h3b1	11.023	361.078	125.258	1611.177	17.835
Ctrl MO NO	No Overlap	h3b1	11.023	351.435	125.601	1142.771	17.835
Ctrl MO NO	No Overlap	h3b1	11.023	357.257	140.457	1726.028	17.835
Ctrl MO NO	No Overlap	h3b1	11.023	338.4	137.985	1758.867	17.835
Ctrl MO NO	No Overlap
Ctrl MO NO	No Overlap	h3b2	15.13	222.672	106.11	871.673	24.513
Ctrl MO NO	No Overlap	h3b2	15.13	283.919	103.112	1373.701	24.513
Ctrl MO NO	No Overlap	h3b2	15.13	311.403	118.743	1506.498	24.513
Ctrl MO NO	No Overlap	h3b2	15.13	325.271	133.625	1232.544	24.513
Ctrl MO NO	No Overlap	h3b2	15.13	348.424	147.359	1034.323	24.513
Ctrl MO NO	No Overlap	h3b2	15.13	382.687	122.035	1283.97	24.513
Ctrl MO NO	No Overlap	h3b2	15.13	404.564	118.829	1687.502	24.513
Ctrl MO NO	No Overlap	h3b2	15.13	373.925	114.334	2199.067	24.513
Ctrl MO NO	No Overlap
Ctrl MO NO	No Overlap	h3b3	16.805	220.616	103.819	643.079	27.236
Ctrl MO NO	No Overlap	h3b3	16.805	275.816	110.178	1138.232	27.236
Ctrl MO NO	No Overlap	h3b3	16.805	318.742	117.893	1755.496	27.236
Ctrl MO NO	No Overlap	h3b3	16.805	349.132	132.797	1877.296	27.236
Ctrl MO NO	No Overlap	h3b3	16.805	379.543	123.231	1803.29	27.236
Ctrl MO NO	No Overlap	h3b3	16.805	423.184	132.647	1545.798	27.236
Ctrl MO NO	No Overlap	h3b3	16.805	425.12	146.557	2189.712	27.236
Ctrl MO NO	No Overlap	h3b3	16.805	375.45	140.097	1555.688	27.236
Ctrl MO NO	No Overlap	h3b3	16.805	237.989	103.346	780.343	27.236
Ctrl MO NO	No Overlap
Ctrl MO NO	No Overlap	h3b4	15.832	218.589	102.896	529.416	25.655
Ctrl MO NO	No Overlap	h3b4	15.832	244.63	102.126	573.215	25.655
Ctrl MO NO	No Overlap	h3b4	15.832	311.128	109.127	957.308	25.655
Ctrl MO NO	No Overlap	h3b4	15.832	344.316	115.772	1588.555	25.655
Ctrl MO NO	No Overlap	h3b4	15.832	356.97	119.024	1718.805	25.655
Ctrl MO NO	No Overlap	h3b4	15.832	344.734	126.748	1437.828	25.655
Ctrl MO NO	No Overlap	h3b4	15.832	306.947	124.079	1358.223	25.655
Ctrl MO NO	No Overlap	h3b4	15.832	294.901	123.361	1170.932	25.655
Ctrl MO NO	No Overlap	h3b4	15.832	293.162	119.436	1277.649	25.655
Ctrl MO NO	No Overlap	h3b4	15.832	276.364	111.003	1751.007	25.655
Ctrl MO NO	No Overlap
Ctrl MO NO	No Overlap	h3b5	7.727	264.708	104.289	1079.071	12.476
Ctrl MO NO	No Overlap	h3b5	7.727	339.184	108.515	1647.127	12.476
Ctrl MO NO	No Overlap	h3b5	7.727	377.409	112.088	2246.954	12.476
Ctrl MO NO	No Overlap	h3b5	7.727	395.448	119.077	2214.701	12.476
Ctrl MO NO	No Overlap	h3b5	7.727	406.013	121.058	1863.687	12.476
Ctrl MO NO	No Overlap	h3b5	7.727	386.373	116.724	1365.38	12.476
Ctrl MO NO	No Overlap	h3b5	7.727	362.011	122.479	1393.788	12.476
Ctrl MO NO	No Overlap	h3b5	7.727	330.768	114.415	1415.943	12.476
Ctrl MO NO	No Overlap	h3b5	7.727	315.85	122.248	1969.361	12.476
Ctrl MO NO	No Overlap	h3b5	7.727	318.698	126.229	1294.092	12.476
Ctrl MO NO	No Overlap
Ctrl MO NO	No Overlap	h4b1	12.86	310.909	114.528	1226.77	20.823
Ctrl MO NO	No Overlap	h4b1	12.86	334.237	116.979	1326.791	20.823
Ctrl MO NO	No Overlap	h4b1	12.86	364.847	123.727	1437.42	20.823
Ctrl MO NO	No Overlap	h4b1	12.86	393.586	136.525	1351.022	20.823
Ctrl MO NO	No Overlap	h4b1	12.86	407.659	127.01	1076.803	20.823
Ctrl MO NO	No Overlap	h4b1	12.86	433.117	123.436	1605.232	20.823
Ctrl MO NO	No Overlap
Ctrl MO NO	No Overlap	h4b2	9.51	316.234	122.059	977.712	15.375
Ctrl MO NO	No Overlap	h4b2	9.51	432.636	126.021	1986.465	15.375
Ctrl MO NO	No Overlap	h4b2	9.51	429.337	134.608	1871.45	15.375
Ctrl MO NO	No Overlap	h4b2	9.51	438.556	137.194	1391.464	15.375
Ctrl MO NO	No Overlap	h4b2	9.51	454.399	149.626	2080.177	15.375
Ctrl MO NO	No Overlap	h4b2	9.51	466.725	168.171	1621.491	15.375
Ctrl MO NO	No Overlap	h4b2	9.51	499.998	169.049	1262.078	15.375
Ctrl MO NO	No Overlap
Ctrl MO NO	No Overlap	h4b3	8.7	280.395	127.404	649.047	14.057
Ctrl MO NO	No Overlap	h4b3	8.7	401.85	136.931	1311.227	14.057
Ctrl MO NO	No Overlap	h4b3	8.7	415.761	174.764	1302.945	14.057
Ctrl MO NO	No Overlap	h4b3	8.7	385.178	156.621	1575.741	14.057
Ctrl MO NO	No Overlap	h4b3	8.7	362.066	156.248	2073.861	14.057
Ctrl MO NO	No Overlap	h4b3	8.7	377.359	170.618	2175.007	14.057
Ctrl MO NO	No Overlap	h4b3	8.7	411.306	144.914	2152.737	14.057
Ctrl MO NO	No Overlap
Ctrl MO NO	No Overlap	h4b4	8.808	289.22	117.327	1023.76	14.233
Ctrl MO NO	No Overlap	h4b4	8.808	399.175	120.183	1934.096	14.233
Ctrl MO NO	No Overlap	h4b4	8.808	422.92	142.21	2320.444	14.233
Ctrl MO NO	No Overlap	h4b4	8.808	447.599	161.707	2515.487	14.233
Ctrl MO NO	No Overlap	h4b4	8.808	456.269	171.655	1935.449	14.233
Ctrl MO NO	No Overlap	h4b4	8.808	474.421	180.858	1270.359	14.233
Ctrl MO NO	No Overlap	h4b4	8.808	526.623	202.588	2112.139	14.233
Ctrl MO NO	No Overlap
Ctrl MO NO	No Overlap	h4b5	9.996	369.15	107.82	1551.307	16.166
Ctrl MO NO	No Overlap	h4b5	9.996	361.824	111.539	1835.996	16.166
Ctrl MO NO	No Overlap	h4b5	9.996	329.885	119.05	1605.142	16.166
Ctrl MO NO	No Overlap	h4b5	9.996	321.674	126.77	1148.93	16.166
Ctrl MO NO	No Overlap	h4b5	9.996	308.733	134.166	1081.524	16.166
Ctrl MO NO	No Overlap	h4b5	9.996	304.973	148.144	1172.799	16.166
Ctrl MO NO	No Overlap	h4b5	9.996	317.385	139.078	903.321	16.166
Ctrl MO NO	No Overlap
Ctrl MO NO	No Overlap	h4b6	8.321	303.633	136.037	1296.193	13.442
Ctrl MO NO	No Overlap	h4b6	8.321	355.449	163.779	1603.107	13.442
Ctrl MO NO	No Overlap	h4b6	8.321	386.283	149.646	1166.041	13.442
Ctrl MO NO	No Overlap	h4b6	8.321	386.92	158.076	1410.877	13.442
Ctrl MO NO	No Overlap	h4b6	8.321	387.427	143.908	1120.693	13.442
Ctrl MO NO	No Overlap	h4b6	8.321	373.873	147.667	1562.984	13.442
Ctrl MO NO	No Overlap
Ctrl MO NO	No Overlap	h4b7	7.997	348.51	105.721	2283.454	12.915
Ctrl MO NO	No Overlap	h4b7	7.997	384.194	118.616	2580.54	12.915
Ctrl MO NO	No Overlap	h4b7	7.997	413.202	138.904	2826.635	12.915
Ctrl MO NO	No Overlap	h4b7	7.997	472.645	152.635	2081.816	12.915
Ctrl MO NO	No Overlap	h4b7	7.997	592.818	149.119	2156.962	12.915
Ctrl MO NO	No Overlap	h4b7	7.997	601.881	160.16	1679.706	12.915
Ctrl MO NO	No Overlap	h4b7	8.537	667.966	265.216	1691.752	13.794
Ctrl MO NO	No Overlap	h5b1	10.158	325.63	116.3	906.945	16.43
Ctrl MO NO	No Overlap	h5b1	10.158	345.935	123.154	1278.594	16.43
Ctrl MO NO	No Overlap	h5b1	10.158	360.34	124.647	2562.847	16.43
Ctrl MO NO	No Overlap	h5b1	10.158	416.458	144.725	3907.896	16.43
Ctrl MO NO	No Overlap	h5b1	10.158	441.263	162.558	2013.353	16.43
Ctrl MO NO	No Overlap	h5b1	10.158	422.57	159.742	1429.451	16.43
Ctrl MO NO	No Overlap
Ctrl MO NO	No Overlap	h5b2	6.16	242.887	102.836	634.121	9.928
Ctrl MO NO	No Overlap	h5b2	6.16	331.793	115.529	1103.502	9.928
Ctrl MO NO	No Overlap	h5b2	6.16	425.616	120.086	1155.363	9.928
Ctrl MO NO	No Overlap	h5b2	6.16	426.256	125.907	1130.32	9.928
Ctrl MO NO	No Overlap	h5b2	6.16	329.284	126.651	801.326	9.928
Ctrl MO NO	No Overlap
Ctrl MO NO	No Overlap	h5b3	11.779	341.417	125.343	960.935	19.065
Ctrl MO NO	No Overlap	h5b3	11.779	441.742	133.301	1345.929	19.065
Ctrl MO NO	No Overlap	h5b3	11.779	541.395	165.862	2264.793	19.065
Ctrl MO NO	No Overlap	h5b3	11.779	479.821	155.117	1709.585	19.065
Ctrl MO NO	No Overlap	h5b3	11.779	325.641	127.652	854.999	19.065
Ctrl MO NO	No Overlap
Ctrl MO NO	No Overlap	h5b4	8.97	301.347	116.652	719.583	14.497
Ctrl MO NO	No Overlap	h5b4	8.97	355.831	149.5	810.434	14.497
Ctrl MO NO	No Overlap	h5b4	8.97	435.416	171.405	1172.109	14.497
Ctrl MO NO	No Overlap	h5b4	8.97	517.152	155.652	1752.031	14.497
Ctrl MO NO	No Overlap	h5b4	8.97	528.107	173.309	2313.002	14.497
Ctrl MO NO	No Overlap
Ctrl MO NO	No Overlap	h5b5	12.482	228.499	100.622	805.295	20.207
Ctrl MO NO	No Overlap	h5b5	12.482	265.939	111.766	736.509	20.207
Ctrl MO NO	No Overlap	h5b5	12.482	272.725	108.08	755.457	20.207
Ctrl MO NO	No Overlap	h5b5	12.482	292.361	116.553	919.293	20.207
Ctrl MO NO	No Overlap	h5b5	12.482	315.28	110.536	1379.977	20.207
Ctrl MO NO	No Overlap	h5b5	12.482	336.794	129.338	1374.205	20.207
Ctrl MO NO	No Overlap	h5b5	12.482	336.947	132.083	1652.921	20.207
Ctrl MO NO	No Overlap
Ctrl MO NO	No Overlap	h5b6	5.025	311.995	114.071	1329.786	8.083
Ctrl MO NO	No Overlap	h5b6	5.025	387.897	122.831	2023.91	8.083
Ctrl MO NO	No Overlap	h5b6	5.025	415.498	147.066	1275.569	8.083
Ctrl MO NO	No Overlap	h5b6	5.025	453.772	139.888	1848.316	8.083
Ctrl MO NO	No Overlap	h5b6	5.025	482.177	153.009	2839.708	8.083
Ctrl MO NO	No Overlap	h5b6	5.025	451.676	178.522	1968.127	8.083
Ctrl MO NO	No Overlap	h5b6	5.025	438.535	146.604	2515.708	8.083
Ctrl MO NO	No Overlap
Ctrl MO NO	No Overlap	h5b7	8.916	340.395	129.297	1062.78	14.409
Ctrl MO NO	No Overlap	h5b7	8.916	390.191	145.38	1494.249	14.409
Ctrl MO NO	No Overlap	h5b7	8.916	433.849	135.175	1300.132	14.409
Ctrl MO NO	No Overlap	h5b7	8.916	440.767	140.078	1034.045	14.409
Ctrl MO NO	No Overlap	h5b7	8.916	425.57	156.609	1156.486	14.409
Ctrl MO NO	No Overlap	h5b7	8.916	389.801	139.368	2157.243	14.409
Ctrl MO NO	No Overlap	h6b1	12.806	480.781	135.546	2343.808	20.735
Ctrl MO NO	No Overlap	h6b1	12.806	496.61	131.235	1816.168	20.735
Ctrl MO NO	No Overlap	h6b1	12.806	502.708	153.339	1855.018	20.735
Ctrl MO NO	No Overlap	h6b1	12.806	497.727	166.336	1563.195	20.735
Ctrl MO NO	No Overlap	h6b1	12.806	535.392	181.072	2447.197	20.735
Ctrl MO NO	No Overlap	h6b1	12.806	579.792	195.318	2754.759	20.735
Ctrl MO NO	No Overlap	h6b1	12.806	559.213	176.635	2142.193	20.735
Ctrl MO NO	No Overlap	h6b1	12.806	478.311	124.483	3619.703	20.735
Ctrl MO NO	No Overlap
Ctrl MO NO	No Overlap	h6b2	18.588	335.588	95.331	946.847	30.136
Ctrl MO NO	No Overlap	h6b2	18.588	363.211	129.355	1331.556	30.136
Ctrl MO NO	No Overlap	h6b2	18.588	362.078	123.168	1576.189	30.136
Ctrl MO NO	No Overlap	h6b2	18.588	337.899	138.189	1103.613	30.136
Ctrl MO NO	No Overlap	h6b2	18.588	288.011	111.419	927.124	30.136
Ctrl MO NO	No Overlap	h6b2	18.588	225.558	110.652	755.852	30.136
Ctrl MO NO	No Overlap	h6b2	18.588	219.068	113.745	1797.931	30.136
Ctrl MO NO	No Overlap
Ctrl MO NO	No Overlap	h6b3	8.754	217.537	100.879	621.685	14.145
Ctrl MO NO	No Overlap	h6b3	8.754	252.17	104.765	781.995	14.145
Ctrl MO NO	No Overlap	h6b3	8.754	253.523	105.323	917.992	14.145
Ctrl MO NO	No Overlap	h6b3	8.754	251.081	107.524	941.871	14.145
Ctrl MO NO	No Overlap	h6b3	8.754	255.681	114.649	873.176	14.145
Ctrl MO NO	No Overlap	h6b3	8.754	278.088	116.408	864.275	14.145
Ctrl MO NO	No Overlap	h6b3	8.754	314.492	118.739	1112.637	14.145
Ctrl MO NO	No Overlap	h6b3	8.754	340.298	133.037	967.948	14.145
Ctrl MO NO	No Overlap
Ctrl MO NO	No Overlap	h6b4	9.078	347.952	125.888	863.108	14.672
Ctrl MO NO	No Overlap	h6b4	9.078	406.993	116.449	1309.101	14.672
Ctrl MO NO	No Overlap	h6b4	9.078	397.666	136.327	1161.817	14.672
Ctrl MO NO	No Overlap	h6b4	9.078	397.169	137.696	1725.303	14.672
Ctrl MO NO	No Overlap	h6b4	9.078	419.188	132.482	2020.099	14.672
Ctrl MO NO	No Overlap	h6b4	8.105	544.209	185.352	1431.486	13.091
Ctrl MO NO	No Overlap	h6b4	8.105	588.67	219.35	2339.17	13.091
Ctrl MO NO	No Overlap	h6b4	8.105	651.928	199.615	3290.497	13.091
Ctrl MO NO	No Overlap	h6b4	8.105	644.667	175.984	2746.114	13.091
Ctrl MO NO	No Overlap
Ctrl MO NO	No Overlap
Ctrl MO NO	No Overlap
Ctrl MO NO	No Overlap
Ctrl MO NO	No Overlap
Ctrl MO NO	No Overlap
Ctrl MO NO	No Overlap
Ctrl MO NO	No Overlap
Ctrl MO NO	No Overlap
Ctrl MO NO	No Overlap
Ctrl MO NO	No Overlap
Ctrl MO NO	No Overlap
Ctrl MO NO	No Overlap
Ctrl MO NO	No Overlap
Ctrl MO NO	No Overlap
Ctrl MO NO	No Overlap
Ctrl MO NO	No Overlap	h7b1	9.186	249.603	108.078	668.792	14.848
Ctrl MO NO	No Overlap	h7b1	9.186	279.693	114.419	943.604	14.848
Ctrl MO NO	No Overlap	h7b1	9.186	304.851	124.018	1190.898	14.848
Ctrl MO NO	No Overlap	h7b1	9.186	329.193	103.736	1087.098	14.848
Ctrl MO NO	No Overlap	h7b1	9.186	360.974	143.981	1199.802	14.848
Ctrl MO NO	No Overlap	h7b1	9.186	390.099	140.384	1045.668	14.848
Ctrl MO NO	No Overlap	h7b1	9.186	404.385	137.47	1003.704	14.848
Ctrl MO NO	No Overlap	h7b1	9.186	396.076	163.608	1103.535	14.848
Ctrl MO NO	No Overlap	h7b1	9.186	384.44	157.018	830.057	14.848
Ctrl MO NO	No Overlap
Ctrl MO NO	No Overlap	h7b2	14.211	332.558	123.551	900.878	23.019
Ctrl MO NO	No Overlap	h7b2	14.211	374.114	122.35	1131.15	23.019
Ctrl MO NO	No Overlap	h7b2	14.211	398.401	124.329	1081.635	23.019
Ctrl MO NO	No Overlap	h7b2	14.211	426.695	127.761	1104.834	23.019
Ctrl MO NO	No Overlap	h7b2	14.211	448.129	123.761	1130.323	23.019
Ctrl MO NO	No Overlap	h7b2	14.211	468.628	140.29	1511.39	23.019
Ctrl MO NO	No Overlap	h7b2	14.211	474.728	160.116	1623.676	23.019
Ctrl MO NO	No Overlap
Ctrl MO NO	No Overlap	h7b3	10.699	243.982	110.358	672.541	17.308
Ctrl MO NO	No Overlap	h7b3	10.699	261.022	107.523	768.65	17.308
Ctrl MO NO	No Overlap	h7b3	10.699	280.281	122.484	703.841	17.308
Ctrl MO NO	No Overlap	h7b3	10.699	297.76	118.7	741.137	17.308
Ctrl MO NO	No Overlap	h7b3	10.699	318.582	119.894	794.149	17.308
Ctrl MO NO	No Overlap	h7b3	10.699	342.245	126.13	909.932	17.308
Ctrl MO NO	No Overlap	h7b3	10.699	370.158	127.358	1468.084	17.308
Ctrl MO NO	No Overlap	h7b3	10.699	389.229	130.308	1940.925	17.308
Ctrl MO NO	No Overlap
Ctrl MO NO	No Overlap	h7b4	8.7	227.235	109.51	653.091	14.057
Ctrl MO NO	No Overlap	h7b4	8.7	270.481	123.585	831.187	14.057
Ctrl MO NO	No Overlap	h7b4	8.7	299.449	119.24	912.437	14.057
Ctrl MO NO	No Overlap	h7b4	8.7	317.446	124.402	894.253	14.057
Ctrl MO NO	No Overlap	h7b4	8.7	335.884	130.664	1120.529	14.057
Ctrl MO NO	No Overlap	h7b4	8.7	352.403	136.086	1083.684	14.057
Ctrl MO NO	No Overlap	h7b4	8.7	364.241	156.347	1075.324	14.057
Ctrl MO NO	No Overlap
Ctrl MO NO	No Overlap	h7b5	10.537	196.495	105.876	970.175	17.045
Ctrl MO NO	No Overlap	h7b5	10.537	212.784	104.629	1093.052	17.045
Ctrl MO NO	No Overlap	h7b5	10.537	232.678	106.106	1142.423	17.045
Ctrl MO NO	No Overlap	h7b5	10.537	241.957	109.759	957.315	17.045
Ctrl MO NO	No Overlap	h7b5	10.537	260.001	111.962	865.316	17.045
Ctrl MO NO	No Overlap	h7b5	10.537	285.286	115.17	1140.278	17.045
Ctrl MO NO	No Overlap	h7b5	10.537	323.791	101.891	1149.244	17.045
Ctrl MO NO	No Overlap	h7b5	10.537	346.402	127.94	1245.575	17.045
Ctrl MO NO	No Overlap	h7b5	10.537	363.614	107.734	1287.135	17.045
Ctrl MO NO	No Overlap	h7b5	10.537	334.929	118.657	1329.141	17.045
Ctrl MO NO	No Overlap	h8b1	5.674	298.55	100.12	2629.87	9.137
Ctrl MO NO	No Overlap	h8b1	5.674	311.288	109.263	2758.657	9.137
Ctrl MO NO	No Overlap	h8b1	5.674	302.752	108.416	2295.501	9.137
Ctrl MO NO	No Overlap	h8b1	5.674	307.999	106.2	2068.647	9.137
Ctrl MO NO	No Overlap	h8b1	5.674	316.507	119.278	1612.562	9.137
Ctrl MO NO	No Overlap	h8b1	5.674	322.52	123.579	1346.173	9.137
Ctrl MO NO	No Overlap
Ctrl MO NO	No Overlap	h8b2	10.753	266.737	108.782	926.989	17.396
Ctrl MO NO	No Overlap	h8b2	10.753	309.078	104.245	1246.662	17.396
Ctrl MO NO	No Overlap	h8b2	10.753	332.334	113.46	1283.939	17.396
Ctrl MO NO	No Overlap	h8b2	10.753	353.181	112.852	1190.512	17.396
Ctrl MO NO	No Overlap	h8b2	10.753	382.503	115.544	1174.883	17.396
Ctrl MO NO	No Overlap	h8b2	10.753	391.66	113.236	1273.732	17.396
Ctrl MO NO	No Overlap	h8b2	10.753	403.873	117.805	1525.346	17.396
Ctrl MO NO	No Overlap	h8b2	10.753	391.97	125.184	1428.628	17.396
Ctrl MO NO	No Overlap	h8b2	10.753	376.236	126.543	1632.922	17.396
Ctrl MO NO	No Overlap	h8b2	10.753	398.679	132.365	2988.974	17.396
Ctrl MO NO	No Overlap
Ctrl MO NO	No Overlap	h8b3	10.321	188.332	103.105	558.264	16.693
Ctrl MO NO	No Overlap	h8b3	10.321	228.084	106.316	727.237	16.693
Ctrl MO NO	No Overlap	h8b3	10.321	265.463	113.102	1204.456	16.693
Ctrl MO NO	No Overlap	h8b3	10.321	285.487	116.601	868.504	16.693
Ctrl MO NO	No Overlap	h8b3	10.321	309.439	96.458	1176.12	16.693
Ctrl MO NO	No Overlap	h8b3	10.321	315.778	111.191	980.685	16.693
Ctrl MO NO	No Overlap	h8b3	10.321	338.488	115.371	985.042	16.693
Ctrl MO NO	No Overlap	h8b3	10.321	353.581	129.028	1103.443	16.693
Ctrl MO NO	No Overlap
Ctrl MO NO	No Overlap	h8b4	11.131	228.393	106.506	715.72	18.011
Ctrl MO NO	No Overlap	h8b4	11.131	293.85	105.187	1355.954	18.011
Ctrl MO NO	No Overlap	h8b4	11.131	362.431	110.811	2576.665	18.011
Ctrl MO NO	No Overlap	h8b4	11.131	381.983	117.789	2373.83	18.011
Ctrl MO NO	No Overlap	h8b4	11.077	484.408	147.15	1772.046	17.923
Ctrl MO NO	No Overlap	h8b4	11.077	480.448	128.37	1476.724	17.923
Ctrl MO NO	No Overlap	h8b4	11.077	506.702	150.358	1489.443	17.923
Ctrl MO NO	No Overlap	h8b4	11.077	534.894	148.844	1769.504	17.923
Ctrl MO NO	No Overlap	h8b4	11.077	570.15	170.295	1791.289	17.923
Ctrl MO NO	No Overlap	h8b4	11.077	576.276	176.274	2570.751	17.923
Ctrl MO NO	No Overlap	h8b4	11.077	503.142	138.277	2624.95	17.923
Ctrl MO NO	No Overlap
Ctrl MO NO	No Overlap	h8b5	6.646	243.316	105.746	659.902	10.719
Ctrl MO NO	No Overlap	h8b5	6.646	302.998	116.334	977.689	10.719
Ctrl MO NO	No Overlap	h8b5	6.646	331.777	119.672	1563.569	10.719
Ctrl MO NO	No Overlap	h8b5	6.7	412.001	126.329	2073.371	10.807
Ctrl MO NO	No Overlap	h8b5	6.7	419.626	120.513	1777.587	10.807
Ctrl MO NO	No Overlap	h8b5	6.7	462.676	132.008	1702.543	10.807
Ctrl MO NO	No Overlap	h8b5	6.7	472.414	137.813	1932.129	10.807
Ctrl MO NO	No Overlap	h8b5	6.7	440.079	129.341	1775.446	10.807
Ctrl MO NO	No Overlap	h8b5	6.7	394.731	143.056	1422.519	10.807
Ctrl MO NO	No Overlap
Ctrl MO NO	No Overlap	h8b6	10.915	286.858	103.145	1335.11	17.66
Ctrl MO NO	No Overlap	h8b6	10.915	347.54	118.264	1916.486	17.66
Ctrl MO NO	No Overlap	h8b6	10.915	374.142	125.071	2361.386	17.66
Ctrl MO NO	No Overlap	h8b6	10.915	378.666	128.835	1906.79	17.66
Ctrl MO NO	No Overlap	h8b6	10.915	388.529	123.56	2341.339	17.66
Ctrl MO NO	No Overlap	h8b6	10.915	395.953	135.391	2134.816	17.66
Ctrl MO NO	No Overlap	h8b6	10.915	401.045	149.764	1336.59	17.66
Ctrl MO NO	No Overlap	h8b6	10.915	401.246	162.77	1077.372	17.66
Ctrl MO NO	No Overlap	h8b6	10.915	409.878	140.947	1499.144	17.66
Ctrl MO NO	No Overlap	h8b6	10.915	431.531	127.683	1264.311	17.66
Ctrl MO NO	No Overlap	h8b6	10.915	456.73	171.308	1493.707	17.66
Ecad MO CO	Complete Overlap	h1b1	17.399	185.706	96.909	526.316	28.203
Ecad MO CO	Complete Overlap	h1b1	17.399	208.507	97.68	630.557	28.203
Ecad MO CO	Complete Overlap	h1b1	17.399	223.938	100.414	619.097	28.203
Ecad MO CO	Complete Overlap	h1b1	17.399	226.878	99.619	660.667	28.203
Ecad MO CO	Complete Overlap	h1b1	17.399	223.558	99.27	791.546	28.203
Ecad MO CO	Complete Overlap	h1b1	17.399	224.643	99.262	1096.682	28.203
Ecad MO CO	Complete Overlap	h1b1	17.399	220.593	101.973	884.993	28.203
Ecad MO CO	Complete Overlap	h1b1	17.399	217.837	107.94	684.709	28.203
Ecad MO CO	Complete Overlap
Ecad MO CO	Complete Overlap	h1b2	5.998	156.026	99.203	415.784	9.664
Ecad MO CO	Complete Overlap	h1b2	5.998	174.189	100.626	618.973	9.664
Ecad MO CO	Complete Overlap	h1b2	5.998	180.718	98.922	561.55	9.664
Ecad MO CO	Complete Overlap	h1b2	5.998	187.074	105.33	606.267	9.664
Ecad MO CO	Complete Overlap	h1b2	5.998	194.641	102.669	480.553	9.664
Ecad MO CO	Complete Overlap	h1b2	5.998	204.873	99.509	428.654	9.664
Ecad MO CO	Complete Overlap	h1b2	5.998	214.116	103.266	672.017	9.664
Ecad MO CO	Complete Overlap	h1b2	5.998	214.876	105.313	779.984	9.664
Ecad MO CO	Complete Overlap
Ecad MO CO	Complete Overlap	h1b3	9.186	196.187	99.952	484.237	14.848
Ecad MO CO	Complete Overlap	h1b3	9.186	228.577	100.743	645.989	14.848
Ecad MO CO	Complete Overlap	h1b3	9.186	278.44	99.102	751.46	14.848
Ecad MO CO	Complete Overlap	h1b3	9.186	286.179	100.963	1085.772	14.848
Ecad MO CO	Complete Overlap	h1b3	9.186	281.434	115.87	1319.98	14.848
Ecad MO CO	Complete Overlap	h1b3	9.186	278.837	107.759	1102.553	14.848
Ecad MO CO	Complete Overlap	h1b3	9.186	244.942	101.339	988.945	14.848
Ecad MO CO	Complete Overlap	h1b3	9.186	220.544	108.978	803.004	14.848
Ecad MO CO	Complete Overlap	h1b3	9.186	203.201	113.858	592.538	14.848
Ecad MO CO	Complete Overlap	h2b1	10.158	200.001	95.355	779.308	16.43
Ecad MO CO	Complete Overlap	h2b1	10.158	240.858	102.416	1344.706	16.43
Ecad MO CO	Complete Overlap	h2b1	10.158	282.222	104.953	1385.974	16.43
Ecad MO CO	Complete Overlap	h2b1	10.158	290.057	106.538	1837.821	16.43
Ecad MO CO	Complete Overlap	h2b1	10.158	274.313	108.999	1384.695	16.43
Ecad MO CO	Complete Overlap
Ecad MO CO	Complete Overlap	h2b2	17.129	179.5	99.56	476.41	27.763
Ecad MO CO	Complete Overlap	h2b2	17.129	222.713	108.148	777.643	27.763
Ecad MO CO	Complete Overlap	h2b2	17.129	280.117	113.833	975.32	27.763
Ecad MO CO	Complete Overlap	h2b2	17.129	322.225	120.416	1284.153	27.763
Ecad MO CO	Complete Overlap	h2b2	17.129	373.13	133.186	1379.885	27.763
Ecad MO CO	Complete Overlap	h2b2	17.129	436.953	125.977	1484.356	27.763
Ecad MO CO	Complete Overlap	h2b2	17.129	442.881	139.932	1822.368	27.763
Ecad MO CO	Complete Overlap	h2b2	17.129	393.437	138.331	2676.049	27.763
Ecad MO CO	Complete Overlap
Ecad MO CO	Complete Overlap	h2b3	11.239	235.64	96.187	697.162	18.187
Ecad MO CO	Complete Overlap	h2b3	11.239	294.753	104.222	752.826	18.187
Ecad MO CO	Complete Overlap	h2b3	11.239	308.211	113.303	993.104	18.187
Ecad MO CO	Complete Overlap	h2b3	11.239	306.57	110.999	946.537	18.187
Ecad MO CO	Complete Overlap	h2b3	11.239	309.447	123.269	1034.806	18.187
Ecad MO CO	Complete Overlap	h2b3	11.239	300.213	125.741	1083.387	18.187
Ecad MO CO	Complete Overlap
Ecad MO CO	Complete Overlap	h2b4	11.023	285.099	102.983	757.478	17.835
Ecad MO CO	Complete Overlap	h2b4	11.023	342.271	101.372	958.577	17.835
Ecad MO CO	Complete Overlap	h2b4	11.023	373.782	102.923	1470.111	17.835
Ecad MO CO	Complete Overlap	h2b4	11.023	381.999	108.584	1864.759	17.835
Ecad MO CO	Complete Overlap	h2b4	11.023	431.872	120.241	2057.543	17.835
Ecad MO CO	Complete Overlap	h2b4	11.023	467.618	117.858	1691.816	17.835
Ecad MO PO	Partial Overlap	h3b5	7.727	315.019	143.65	1003.564	12.476
Ecad MO PO	Partial Overlap	h3b5	7.727	253.523	122.218	533.119	12.476
Ecad MO PO	Partial Overlap	h3b5	7.727	215.922	118.484	589.225	12.476
Ecad MO PO	Partial Overlap	h3b5	7.727	209.091	105.661	929.421	12.476
Ecad MO PO	Partial Overlap
Ecad MO PO	Partial Overlap	h4b1	12.158	252.42	105.649	1665.408	19.68
Ecad MO PO	Partial Overlap	h4b1	12.158	247.961	102.246	1238.447	19.68
Ecad MO PO	Partial Overlap	h4b1	12.158	228.994	97.229	1650.013	19.68
Ecad MO PO	Partial Overlap	h4b1	12.158	202.736	103.994	969.1	19.68
Ecad MO PO	Partial Overlap	h4b1	12.158	171.147	100.512	669.824	19.68
Ecad MO PO	Partial Overlap	h4b1	12.158	149.963	96.784	394.584	19.68
Ecad MO PO	Partial Overlap
Ecad MO PO	Partial Overlap	h4b2	10.104	365.689	133.562	4084.374	16.342
Ecad MO PO	Partial Overlap	h4b2	10.104	315.896	105.726	3994.01	16.342
Ecad MO PO	Partial Overlap	h4b2	10.104	250.729	109.136	1428.927	16.342
Ecad MO PO	Partial Overlap	h4b2	10.104	210.655	108.885	932.121	16.342
Ecad MO PO	Partial Overlap	h4b2	10.104	186.382	105.506	539.47	16.342
Ecad MO PO	Partial Overlap
Ecad MO PO	Partial Overlap	h4b3	15.508	251.412	108.331	1483.597	25.128
Ecad MO PO	Partial Overlap	h4b3	15.508	277.662	109.306	1887.589	25.128
Ecad MO PO	Partial Overlap	h4b3	15.508	285.544	110.446	2406.306	25.128
Ecad MO PO	Partial Overlap	h4b3	15.508	270.662	100.068	1444.093	25.128
Ecad MO PO	Partial Overlap	h4b3	15.508	243.588	106.908	976.769	25.128
Ecad MO PO	Partial Overlap	h4b3	15.508	212.76	103.762	887.708	25.128
Ecad MO PO	Partial Overlap	h5b1	4.701	184.954	100.452	900.373	7.556
Ecad MO PO	Partial Overlap	h5b1	4.701	184.993	100.066	623.543	7.556
Ecad MO PO	Partial Overlap	h5b1	4.701	177.432	101.171	520.114	7.556
Ecad MO PO	Partial Overlap	h5b1	4.701	168.806	100.374	624.347	7.556
Ecad MO PO	Partial Overlap	h5b1	4.701	160.987	91.311	710.467	7.556
Ecad MO PO	Partial Overlap	h5b1	4.701	148.881	100.511	573.736	7.556
Ecad MO PO	Partial Overlap	h5b1	4.701	140.519	94.974	302.661	7.556
Ecad MO PO	Partial Overlap
Ecad MO PO	Partial Overlap	h5b2	7.889	148.694	99.246	443.468	12.739
Ecad MO PO	Partial Overlap	h5b2	7.889	151.904	99.793	530.997	12.739
Ecad MO PO	Partial Overlap	h5b2	7.889	148.336	97.61	447.365	12.739
Ecad MO PO	Partial Overlap	h5b2	7.889	142.913	99.182	294.01	12.739
Ecad MO PO	Partial Overlap	h5b2	7.889	140.697	98.426	349.332	12.739
Ecad MO PO	Partial Overlap	h5b2	7.889	138.857	100.603	365.368	12.739
Ecad MO PO	Partial Overlap
Ecad MO PO	Partial Overlap	h5b3	10.104	232.261	105.597	689.239	16.342
Ecad MO PO	Partial Overlap	h5b3	10.104	224.509	105.325	837.212	16.342
Ecad MO PO	Partial Overlap	h5b3	10.104	215.412	104.732	869.439	16.342
Ecad MO PO	Partial Overlap	h5b3	10.104	200.71	101.78	921.266	16.342
Ecad MO PO	Partial Overlap	h5b3	10.104	175.493	96.978	488.631	16.342
Ecad MO PO	Partial Overlap	h5b3	10.104	163.732	99.952	378.702	16.342
Ecad MO PO	Partial Overlap
Ecad MO PO	Partial Overlap	h5b4	10.05	312.921	115.655	927.24	16.254
Ecad MO PO	Partial Overlap	h5b4	10.05	292.543	113.225	851.411	16.254
Ecad MO PO	Partial Overlap	h5b4	10.05	251.916	123.944	694.38	16.254
Ecad MO PO	Partial Overlap	h5b4	10.05	199.002	105.732	446.411	16.254
Ecad MO PO	Partial Overlap	h5b4	10.05	162.091	107.802	300.036	16.254
Ecad MO PO	Partial Overlap	h5b4	10.05	149.352	103.923	322.845	16.254
Ecad MO PO	Partial Overlap
Ecad MO PO	Partial Overlap	h5b5	4.053	351.08	139.385	1162.817	6.502
Ecad MO PO	Partial Overlap	h5b5	4.053	367.48	153.564	758.423	6.502
Ecad MO PO	Partial Overlap	h5b5	4.053	353.792	166.294	658.617	6.502
Ecad MO PO	Partial Overlap	h5b5	4.053	304.144	142.97	774.733	6.502
Ecad MO PO	Partial Overlap	h5b5	4.053	242.235	124.963	623.927	6.502
Ecad MO PO	Partial Overlap	h5b5	4.053	211.779	120.149	477.578	6.502
Ecad MO PO	Partial Overlap	h5b5	4.053	186.34	116.945	428.318	6.502
Ecad MO PO	Partial Overlap
Ecad MO PO	Partial Overlap	h5b6	6.268	165.084	103.789	450.234	10.104
Ecad MO PO	Partial Overlap	h5b6	6.268	155.253	101.054	320.564	10.104
Ecad MO PO	Partial Overlap	h5b6	6.268	143.768	94.693	309.684	10.104
Ecad MO PO	Partial Overlap	h5b6	6.268	135.885	101.208	280.04	10.104
Ecad MO PO	Partial Overlap	h5b6	6.268	130.401	97.916	214.041	10.104
Ecad MO NO	No Overlap	h1b1	10.861	599.332	204.753	1547.545	17.572
Ecad MO NO	No Overlap	h1b1	10.861	517.362	200.011	1440.36	17.572
Ecad MO NO	No Overlap	h1b1	10.861	398.732	154.729	1088.746	17.572
Ecad MO NO	No Overlap	h1b1	10.861	333.511	139.877	894.217	17.572
Ecad MO NO	No Overlap	h1b1	10.861	281.086	128.603	633.387	17.572
Ecad MO NO	No Overlap	h1b1	10.861	232.657	124.45	504.763	17.572
Ecad MO NO	No Overlap	h1b1	10.861	194.41	105.351	425.77	17.572
Ecad MO NO	No Overlap
Ecad MO NO	No Overlap	h1b2	6.646	628.255	170.716	2219.899	10.719
Ecad MO NO	No Overlap	h1b2	6.646	593.508	142.171	2211.046	10.719
Ecad MO NO	No Overlap	h1b2	6.646	553.17	155.736	2070.268	10.719
Ecad MO NO	No Overlap	h1b2	6.646	454.5	139.371	1543.738	10.719
Ecad MO NO	No Overlap	h1b2	6.646	343.894	158.107	860.103	10.719
Ecad MO NO	No Overlap	h1b2	6.646	293.227	138.255	739.92	10.719
Ecad MO NO	No Overlap	h1b2	6.646	266.514	134.492	807.316	10.719
Ecad MO NO	No Overlap
Ecad MO NO	No Overlap	h1b3	8.105	485.477	133.221	2123.206	13.084
Ecad MO NO	No Overlap	h1b3	8.105	462.87	138.968	2008.791	13.084
Ecad MO NO	No Overlap	h1b3	8.105	398.884	129.946	1250.585	13.084
Ecad MO NO	No Overlap	h1b3	8.105	364.897	132.875	1127.163	13.084
Ecad MO NO	No Overlap	h1b3	8.105	337.332	131.492	1165.162	13.084
Ecad MO NO	No Overlap
Ecad MO NO	No Overlap	h1b4	8.267	718.526	182.926	1765.522	13.354
Ecad MO NO	No Overlap	h1b4	8.267	660.972	207.308	1631.72	13.354
Ecad MO NO	No Overlap	h1b4	8.267	566.991	188.86	1345.524	13.354
Ecad MO NO	No Overlap	h1b4	8.267	459.482	188.47	1351.679	13.354
Ecad MO NO	No Overlap	h1b4	8.267	341.733	158.874	1386.551	13.354
Ecad MO NO	No Overlap	h1b4	8.267	263.251	123.883	1087.818	13.354
Ecad MO NO	No Overlap
Ecad MO NO	No Overlap	h1b5	8.591	705.354	186.169	1936.699	13.882
Ecad MO NO	No Overlap	h1b5	8.591	713.331	217.492	2009.868	13.882
Ecad MO NO	No Overlap	h1b5	8.591	709.554	213.962	2003.862	13.882
Ecad MO NO	No Overlap	h1b5	8.591	679.605	182.481	1978.64	13.882
Ecad MO NO	No Overlap	h1b5	8.591	594.575	196.188	1511.16	13.882
Ecad MO NO	No Overlap	h1b5	8.591	524.927	179.898	1265.907	13.882
Ecad MO NO	No Overlap	h1b5	8.591	447.293	178.377	1154.088	13.882
Ecad MO NO	No Overlap	h1b5	8.591	360.095	151.678	1030.968	13.882
Ecad MO NO	No Overlap	h1b5	8.591	281.535	133.985	876.982	13.882
Ecad MO NO	No Overlap
Ecad MO NO	No Overlap	h1b6	4.701	609.238	0	1386.228	7.556
Ecad MO NO	No Overlap	h1b6	4.701	607.392	0	1644.974	7.556
Ecad MO NO	No Overlap	h1b6	4.701	569.873	0	2117.439	7.556
Ecad MO NO	No Overlap	h2b1	12.104	866.487	306.636	3778.802	19.592
Ecad MO NO	No Overlap	h2b1	12.104	1006.048	369.372	3510.739	19.592
Ecad MO NO	No Overlap	h2b1	12.104	843.058	321.263	2769.895	19.592
Ecad MO NO	No Overlap	h2b1	12.104	556.321	225.799	4002.375	19.592
Ecad MO NO	No Overlap	h2b1	12.104	417.604	146.936	4095	19.592
Ecad MO NO	No Overlap	h2b1	12.104	302.199	134.019	1692.997	19.592
Ecad MO NO	No Overlap
Ecad MO NO	No Overlap	h2b2	9.51	1006.999	254.824	4093.911	15.375
Ecad MO NO	No Overlap	h2b2	9.51	971.052	240.256	3757.152	15.375
Ecad MO NO	No Overlap	h2b2	9.51	630.578	267.864	1926.784	15.375
Ecad MO NO	No Overlap	h2b2	9.51	352.776	152.246	1007.12	15.375
Ecad MO NO	No Overlap
Ecad MO NO	No Overlap	h2b3	12.158	757.682	182.224	3252.553	19.68
Ecad MO NO	No Overlap	h2b3	12.158	762.614	190.223	2594.421	19.68
Ecad MO NO	No Overlap	h2b3	12.158	637.954	198.121	2350.743	19.68
Ecad MO NO	No Overlap	h2b3	12.158	388.618	153.676	1444.468	19.68
Ecad MO NO	No Overlap	h2b3	12.158	251.698	127.609	653.181	19.68
Ecad MO NO	No Overlap
Ecad MO NO	No Overlap	h2b4	8.808	921.794	174.397	4087.167	14.233
Ecad MO NO	No Overlap	h2b4	8.808	829.293	211.625	2692.36	14.233
Ecad MO NO	No Overlap	h2b4	8.808	510.06	207.481	3072.19	14.233
Ecad MO NO	No Overlap	h2b4	8.808	329.885	134.265	1739.329	14.233
Ecad MO NO	No Overlap	h2b4	8.808	243.334	121.293	867.464	14.233
Ecad MO NO	No Overlap
Ecad MO NO	No Overlap	h2b5	7.295	703.519	260.496	1663.33	11.773
Ecad MO NO	No Overlap	h2b5	7.295	577.481	272.75	1373.212	11.773
Ecad MO NO	No Overlap	h2b5	7.295	484.218	201.093	1966.075	11.773
Ecad MO NO	No Overlap	h2b5	7.295	366.092	146.28	2339.541	11.773
Ecad MO NO	No Overlap
Ecad MO NO	No Overlap	h2b6	6.214	1041.802	250.801	4095	10.016
Ecad MO NO	No Overlap	h2b6	6.214	831.549	277.732	3639.612	10.016
Ecad MO NO	No Overlap	h2b6	6.214	465.054	199.208	849.333	10.016
Ecad MO NO	No Overlap	h2b6	6.214	300.172	151.105	617.678	10.016
Ecad MO NO	No Overlap	h3b1	9.024	709.49	207.335	1880.923	14.585
Ecad MO NO	No Overlap	h3b1	9.024	744.778	229.903	2033.364	14.585
Ecad MO NO	No Overlap	h3b1	9.024	709.974	222.406	2382.675	14.585
Ecad MO NO	No Overlap	h3b1	9.024	630.186	190.797	2418.14	14.585
Ecad MO NO	No Overlap	h3b1	9.024	516.847	206.518	2070.767	14.585
Ecad MO NO	No Overlap	h3b1	9.024	375.772	144.321	861.873	14.585
Ecad MO NO	No Overlap	h3b1	9.024	293.676	139.595	1245.248	14.585
Ecad MO NO	No Overlap	h3b1	9.024	263.431	134.332	1153.386	14.585
Ecad MO NO	No Overlap	h3b1	9.024	245.03	115.72	957.679	14.585
Ecad MO NO	No Overlap
Ecad MO NO	No Overlap	h3b2	9.888	597.794	168.348	2979.065	15.99
Ecad MO NO	No Overlap	h3b2	9.888	639.741	213.51	2083.944	15.99
Ecad MO NO	No Overlap	h3b2	9.888	623.085	205.537	1782.638	15.99
Ecad MO NO	No Overlap	h3b2	9.888	551.259	212.413	1505.506	15.99
Ecad MO NO	No Overlap	h3b2	9.888	455.401	184.17	1058.933	15.99
Ecad MO NO	No Overlap	h3b2	9.888	371.39	165.931	1226.854	15.99
Ecad MO NO	No Overlap	h3b2	9.888	318.299	147.294	1146.289	15.99
Ecad MO NO	No Overlap	h3b2	9.888	274.588	122.722	927.95	15.99
Ecad MO NO	No Overlap	h3b2	9.888	223.945	100.78	1051.901	15.99
Ecad MO NO	No Overlap
Ecad MO NO	No Overlap	h3b3	9.726	700.626	196.131	4095	15.727
Ecad MO NO	No Overlap	h3b3	9.726	693.509	193.842	4080.521	15.727
Ecad MO NO	No Overlap	h3b3	9.726	577.527	208.717	1767.23	15.727
Ecad MO NO	No Overlap	h3b3	9.726	443.783	185.142	1413.226	15.727
Ecad MO NO	No Overlap	h3b3	9.726	353.907	154.043	1334.049	15.727
Ecad MO NO	No Overlap	h3b3	9.726	287.985	129.15	875.72	15.727
Ecad MO NO	No Overlap
Ecad MO NO	No Overlap	h3b4	8.105	571.382	187.089	1419.036	13.084
Ecad MO NO	No Overlap	h3b4	8.105	444.361	189.776	1149.463	13.084
Ecad MO NO	No Overlap	h3b4	8.105	330.795	149.457	1108.373	13.084
Ecad MO NO	No Overlap	h3b4	8.105	259.675	136.882	798.959	13.084
Ecad MO NO	No Overlap	h3b4	8.105	208.712	113.814	420.997	13.084
Ecad MO NO	No Overlap	h3b4	8.105	172.315	111.036	358.45	13.084
Ecad MO NO	No Overlap	h3b4	8.105	154.232	105.126	365.583	13.084
Ecad MO NO	No Overlap	h4b1	15.4	335.276	107.855	2230.684	24.952
Ecad MO NO	No Overlap	h4b1	15.4	291.43	110.722	1489.672	24.952
Ecad MO NO	No Overlap	h4b1	15.4	246.87	109.802	708.737	24.952
Ecad MO NO	No Overlap	h4b1	15.4	215.123	111.404	1189.594	24.952
Ecad MO NO	No Overlap	h4b1	15.4	190.742	107.022	1990.496	24.952
Ecad MO NO	No Overlap	h4b1	15.4	171.321	99.239	2440.059	24.952
Ecad MO NO	No Overlap
Ecad MO NO	No Overlap	h4b2	10.753	335.901	99.195	2363.437	17.396
Ecad MO NO	No Overlap	h4b2	10.753	316.838	107.637	1034.129	17.396
Ecad MO NO	No Overlap	h4b2	10.753	270.203	108.94	918.398	17.396
Ecad MO NO	No Overlap	h4b2	10.753	219.723	106.01	781.86	17.396
Ecad MO NO	No Overlap	h4b2	10.753	184.982	103.627	536.235	17.396
Ecad MO NO	No Overlap
Ecad MO NO	No Overlap	h4b3	13.563	355.076	125.596	1698.795	21.965
Ecad MO NO	No Overlap	h4b3	13.563	369.036	122.994	2619.973	21.965
Ecad MO NO	No Overlap	h4b3	13.563	367.033	142.178	3834.606	21.965
Ecad MO NO	No Overlap	h4b3	13.563	341.095	130.589	3954.771	21.965
Ecad MO NO	No Overlap	h4b3	13.563	294.452	122.229	2602.118	21.965
Ecad MO NO	No Overlap
Ecad MO NO	No Overlap	h4b4	12.644	326.868	116.991	1382.969	20.471
Ecad MO NO	No Overlap	h4b4	12.644	292.373	124.114	1309.384	20.471
Ecad MO NO	No Overlap	h4b4	12.644	227.625	110.101	977.475	20.471
Ecad MO NO	No Overlap	h4b4	12.644	181.52	106.842	656.165	20.471
Ecad MO NO	No Overlap	h5b1	7.078	277.373	115.147	891.314	11.422
Ecad MO NO	No Overlap	h5b1	7.078	278.472	106.805	1312.949	11.422
Ecad MO NO	No Overlap	h5b1	7.078	266.807	112.913	1405.387	11.422
Ecad MO NO	No Overlap	h5b1	7.078	222.755	112.461	1005.786	11.422
Ecad MO NO	No Overlap	h5b1	7.078	187.356	108.289	461.584	11.422
Ecad MO NO	No Overlap	h5b1	7.078	175.676	111.764	423.834	11.422
Ecad MO NO	No Overlap
Ecad MO NO	No Overlap	h5b2	9.618	178.252	104.696	409.764	15.551
Ecad MO NO	No Overlap	h5b2	9.618	172.783	100.324	438.595	15.551
Ecad MO NO	No Overlap	h5b2	9.618	167.829	100.812	473.531	15.551
Ecad MO NO	No Overlap	h5b2	9.618	162.306	100.987	493.713	15.551
Ecad MO NO	No Overlap	h5b2	9.618	157.074	99.229	624.842	15.551
Ecad MO NO	No Overlap	h5b2	9.618	150.914	97.793	1181.634	15.551
Ecad MO NO	No Overlap
Ecad MO NO	No Overlap	h5b3	7.403	214.13	112.594	539.548	11.902
Ecad MO NO	No Overlap	h5b3	7.403	214.688	108.863	566.675	11.902
Ecad MO NO	No Overlap	h5b3	7.403	211.515	107.23	454.196	11.902
Ecad MO NO	No Overlap	h5b3	7.403	206.069	114.056	489.259	11.902
Ecad MO NO	No Overlap	h5b3	7.403	199.46	112.571	735.158	11.902
Ecad MO NO	No Overlap	h5b3	7.403	188.5	105.271	803.681	11.902
Ecad MO NO	No Overlap	h5b3	7.403	176.898	101.027	489.457	11.902
Ecad MO NO	No Overlap
Ecad MO NO	No Overlap	h5b4	11.833	414.821	116.096	2634.381	19.153
Ecad MO NO	No Overlap	h5b4	11.833	414.243	109.353	2025.894	19.153
Ecad MO NO	No Overlap	h5b4	11.833	389.368	112.476	1396.754	19.153
Ecad MO NO	No Overlap	h5b4	11.833	351.602	106.581	1572.739	19.153
Ecad MO NO	No Overlap	h5b4	11.833	284.893	102.689	1410.391	19.153
Ecad MO NO	No Overlap	h5b4	11.833	223.597	105.328	745.853	19.153
Ecad MO NO	No Overlap	h5b4	11.833	191.586	104.963	585.483	19.153
Ecad MO NO	No Overlap
Ecad MO NO	No Overlap	h5b5	6.484	428.291	123.264	1210.573	10.455
Ecad MO NO	No Overlap	h5b5	6.484	420.708	134.643	1213.175	10.455
Ecad MO NO	No Overlap	h5b5	6.484	387.401	141.216	1334.4	10.455
Ecad MO NO	No Overlap	h5b5	6.484	370.471	137.984	1064.378	10.455
Ecad MO NO	No Overlap	h5b5	6.484	342.336	127.344	1006.432	10.455
Ecad MO NO	No Overlap	h5b5	6.484	307.694	131.718	955.799	10.455
Ecad MO NO	No Overlap	h5b5	6.484	282.114	101.493	904.888	10.455
Ecad MO NO	No Overlap	h5b5	6.484	258.471	108.486	934.236	10.455
Ecad MO NO	No Overlap
Ecad MO NO	No Overlap	h5b6	7.024	393.966	121.435	1759.69	11.334
Ecad MO NO	No Overlap	h5b6	7.024	330.559	110.096	980.662	11.334
Ecad MO NO	No Overlap	h5b6	7.024	293.08	121.944	978.337	11.334
Ecad MO NO	No Overlap	h5b6	7.024	261.81	119.553	881.516	11.334
Ecad MO NO	No Overlap	h5b6	7.024	235.623	112.306	1005.819	11.334
Ecad MO NO	No Overlap	h5b6	7.024	213.985	108.846	883.861	11.334
Ecad MO NO	No Overlap	h5b6	7.024	189.566	102.381	772.804	11.334
Ecad MO NO	No Overlap
Ecad MO NO	No Overlap	h5b7	9.888	321.762	125.077	1573.447	15.99
Ecad MO NO	No Overlap	h5b7	9.888	317.834	117.912	1703.146	15.99
Ecad MO NO	No Overlap	h5b7	9.888	294.771	114.316	1319.339	15.99
Ecad MO NO	No Overlap	h5b7	9.888	258.256	107.161	1143.089	15.99
Ecad MO NO	No Overlap	h5b7	9.888	212.755	102.558	630.044	15.99
Ecad MO NO	No Overlap	h5b7	9.888	184.218	108.126	505.427	15.99
Ecad MO NO	No Overlap	h5b7	9.888	153.65	102.717	411.838	15.99
