# Supplementary material for: Stepwise polarisation of developing bilayered epidermis is mediated by aPKC and E-cadherin in zebrafish
Source: eLife. 2020 Jan 22;9:e49064. doi: 10.7554/eLife.49064 (PMC6975926; doi:10.7554/eLife.49064)
Supplement: Figure 4—figure supplement 2—source data 4. [file elife-49064-fig4-figsupp2-data4.csv]

Genotype	Boundary	Cell name	Area	Mean	Min	Max	Length
Ctrl MO C-C	Clone- Clone	h1b1	9.294	414.709	160.17	1218.393	15.024
Ctrl MO C-C	Clone- Clone	h1b1	9.294	410.097	144.736	1009.067	15.024
Ctrl MO C-C	Clone- Clone	h1b1	9.294	375.808	142.977	1553.633	15.024
Ctrl MO C-C	Clone- Clone	h1b1	9.294	350.816	124.979	1790.464	15.024
Ctrl MO C-C	Clone- Clone	h1b1	9.294	326.645	134.572	1224.666	15.024
Ctrl MO C-C	Clone- Clone	h1b1	9.294	297.476	114.553	1165.752	15.024
Ctrl MO C-C	Clone- Clone	h1b1	9.294	269.812	125.192	858.5	15.024
Ctrl MO C-C	Clone- Clone
Ctrl MO C-C	Clone- Clone	h1b2	8.213	538.193	149.689	1594.541	13.267
Ctrl MO C-C	Clone- Clone	h1b2	8.213	505.029	152.48	1492.231	13.267
Ctrl MO C-C	Clone- Clone	h1b2	8.213	454.953	149.123	1408.453	13.267
Ctrl MO C-C	Clone- Clone	h1b2	8.213	385.702	157.448	1028.357	13.267
Ctrl MO C-C	Clone- Clone	h1b2	8.213	327.695	141.066	1026.001	13.267
Ctrl MO C-C	Clone- Clone	h1b2	8.213	291.511	129.714	808.681	13.267
Ctrl MO C-C	Clone- Clone	h1b2	8.213	262.022	118.515	528.114	13.267
Ctrl MO C-C	Clone- Clone
Ctrl MO C-C	Clone- Clone	h1b3	7.295	611.068	198.495	1714.941	11.773
Ctrl MO C-C	Clone- Clone	h1b3	7.295	520.404	204.295	1162.887	11.773
Ctrl MO C-C	Clone- Clone	h1b3	7.295	431.252	203.769	1222.038	11.773
Ctrl MO C-C	Clone- Clone	h1b3	7.295	373.142	177.718	950.908	11.773
Ctrl MO C-C	Clone- Clone	h1b3	7.295	339.854	147.693	1250.194	11.773
Ctrl MO C-C	Clone- Clone	h1b3	7.295	289.988	142.95	1128.016	11.773
Ctrl MO C-C	Clone- Clone	h1b3	7.295	257.049	141.813	894.868	11.773
Ctrl MO C-C	Clone- Clone	h1b3	7.295	229.033	121.888	993.604	11.773
Ctrl MO C-C	Clone- Clone
Ctrl MO C-C	Clone- Clone	h1b4	7.295	543.426	133.322	2394.053	11.773
Ctrl MO C-C	Clone- Clone	h1b4	7.295	586.242	173.189	1931.767	11.773
Ctrl MO C-C	Clone- Clone	h1b4	7.295	610.681	202.528	2245.293	11.773
Ctrl MO C-C	Clone- Clone	h1b4	7.295	605.575	181.665	1982.512	11.773
Ctrl MO C-C	Clone- Clone	h1b4	7.295	539.877	221.349	2014.578	11.773
Ctrl MO C-C	Clone- Clone	h1b4	7.727	559.843	239.343	1696.366	12.476
Ctrl MO C-C	Clone- Clone	h1b4	7.727	506.741	208.535	1616.685	12.476
Ctrl MO C-C	Clone- Clone	h1b4	7.727	419.016	162.645	1370.439	12.476
Ctrl MO C-C	Clone- Clone	h1b4	7.727	340.952	139.532	987.704	12.476
Ctrl MO C-C	Clone- Clone	h1b4	7.727	271.083	132.57	602.035	12.476
Ctrl MO C-C	Clone- Clone	h2b1	6.646	496.191	132.207	1735.493	10.719
Ctrl MO C-C	Clone- Clone	h2b1	6.646	568.847	130.406	1709.434	10.719
Ctrl MO C-C	Clone- Clone	h2b1	6.646	597.994	146.008	1742.189	10.719
Ctrl MO C-C	Clone- Clone	h2b1	6.646	630.87	151.781	1622.409	10.719
Ctrl MO C-C	Clone- Clone	h2b1	6.646	654.47	153.288	2032.979	10.719
Ctrl MO C-C	Clone- Clone	h2b1	6.646	624.309	157.013	2061.346	10.719
Ctrl MO C-C	Clone- Clone	h2b1	6.646	574.694	153.011	1820.078	10.719
Ctrl MO C-C	Clone- Clone	h2b1	6.646	524.412	157.136	1507.048	10.719
Ctrl MO C-C	Clone- Clone	h2b1	6.646	473.673	136.791	1347.51	10.719
Ctrl MO C-C	Clone- Clone	h2b1	5.241	506.387	177.074	1162.008	8.434
Ctrl MO C-C	Clone- Clone	h2b1	5.241	460.469	187.136	1304.631	8.434
Ctrl MO C-C	Clone- Clone	h2b1	5.241	401.668	129.984	1211.583	8.434
Ctrl MO C-C	Clone- Clone
Ctrl MO C-C	Clone- Clone	h2b2	4.593	658.385	174.418	1908.113	7.38
Ctrl MO C-C	Clone- Clone	h2b2	4.593	677.849	181.52	1710.548	7.38
Ctrl MO C-C	Clone- Clone	h2b2	4.593	648.044	206.642	1514.232	7.38
Ctrl MO C-C	Clone- Clone	h2b2	4.593	633.427	193.531	1653.463	7.38
Ctrl MO C-C	Clone- Clone	h2b2	4.593	590.063	195.613	1560.48	7.38
Ctrl MO C-C	Clone- Clone	h2b2	4.593	525.733	207.844	1344.441	7.38
Ctrl MO C-C	Clone- Clone	h2b2	4.593	448.01	180.541	1127.336	7.38
Ctrl MO C-C	Clone- Clone	h2b2	4.593	394.491	171.299	1014.634	7.38
Ctrl MO C-C	Clone- Clone	h2b2	4.593	358.538	143.349	1321.655	7.38
Ctrl MO C-C	Clone- Clone	h2b2	4.593	335.25	124.128	1315.05	7.38
Ctrl MO C-C	Clone- Clone
Ctrl MO C-C	Clone- Clone	h2b3	4.053	671.596	168.129	2068.369	6.502
Ctrl MO C-C	Clone- Clone	h2b3	4.053	725.396	164.56	2935.857	6.502
Ctrl MO C-C	Clone- Clone	h2b3	4.053	631.928	135.941	3156.117	6.502
Ctrl MO C-C	Clone- Clone	h2b3	4.053	486.196	164.257	1917.063	6.502
Ctrl MO C-C	Clone- Clone	h2b3	4.053	306.857	144.783	591.516	6.502
Ctrl MO C-C	Clone- Clone	h2b3	4.053	207.088	128.04	345.011	6.502
Ctrl MO C-C	Clone- Clone
Ctrl MO C-C	Clone- Clone	h2b4	6.16	430.43	135.197	2497.262	9.928
Ctrl MO C-C	Clone- Clone	h2b4	6.16	460.262	131.892	2195.017	9.928
Ctrl MO C-C	Clone- Clone	h2b4	6.16	474.932	133.768	1839.662	9.928
Ctrl MO C-C	Clone- Clone	h2b4	6.16	491.678	129.783	1359.939	9.928
Ctrl MO C-C	Clone- Clone	h2b4	6.16	541.231	144.275	1365.37	9.928
Ctrl MO C-C	Clone- Clone	h2b4	6.16	521.824	172.367	2172.319	9.928
Ctrl MO C-C	Clone- Clone	h2b4	6.16	465.247	179.877	2475.585	9.928
Ctrl MO C-C	Clone- Clone	h2b4	6.16	385.353	140.659	2173.329	9.928
Ctrl MO C-C	Clone- Clone
Ctrl MO C-C	Clone- Clone	h3b1	15.076	549.75	140.233	4095	24.425
Ctrl MO C-C	Clone- Clone	h3b1	15.076	458.793	140.82	1664.626	24.425
Ctrl MO C-C	Clone- Clone	h3b1	15.076	306.231	126.279	668.036	24.425
Ctrl MO C-C	Clone- Clone	h3b1	15.076	233.45	108.518	565.336	24.425
Ctrl MO C-C	Clone- Clone	h3b1	15.076	192.336	103.911	684.389	24.425
Ctrl MO C-C	Clone- Clone	h3b1	15.076	171.405	102.165	629.782	24.425
Ctrl MO C-C	Clone- Clone
Ctrl MO C-C	Clone- Clone	h3b2	14.967	468.35	139.918	2696.052	24.249
Ctrl MO C-C	Clone- Clone	h3b2	14.967	400.612	117.833	1682.476	24.249
Ctrl MO C-C	Clone- Clone	h3b2	14.967	373.495	134.397	1460.88	24.249
Ctrl MO C-C	Clone- Clone	h3b2	14.967	302.154	108.206	888.265	24.249
Ctrl MO C-C	Clone- Clone	h3b2	14.967	257.702	110.532	1137.518	24.249
Ctrl MO C-C	Clone- Clone
Ctrl MO C-C	Clone- Clone	h3b3	7.024	639.739	209.415	1883.797	11.334
Ctrl MO C-C	Clone- Clone	h3b3	7.024	696.682	234.257	2732.375	11.334
Ctrl MO C-C	Clone- Clone	h3b3	7.024	529.523	200.709	1308.051	11.334
Ctrl MO C-C	Clone- Clone	h3b3	7.024	383.005	157.166	733.365	11.334
Ctrl MO C-C	Clone- Clone	h3b3	7.024	287.465	138.052	924.852	11.334
Ctrl MO C-C	Clone- Clone	h3b3	7.024	243.549	120.561	756.355	11.334
Ctrl MO C-C	Clone- Clone
Ctrl MO C-C	Clone- Clone	h3b4	7.673	579.312	180.17	1687.827	12.388
Ctrl MO C-C	Clone- Clone	h3b4	7.673	428.339	139.084	1172.108	12.388
Ctrl MO C-C	Clone- Clone	h3b4	7.673	336.77	113.213	974.38	12.388
Ctrl MO C-C	Clone- Clone	h3b4	7.673	269.554	110.748	978.881	12.388
Ctrl MO C-C	Clone- Clone	h3b4	7.673	239.849	104.003	773.027	12.388
Ctrl MO C-C	Clone- Clone
Ctrl MO C-C	Clone- Clone	h3b5	6.484	468.74	155.077	2175.532	10.455
Ctrl MO C-C	Clone- Clone	h3b5	6.484	372.792	157.372	766.898	10.455
Ctrl MO C-C	Clone- Clone	h3b5	6.484	262.362	132.616	577.531	10.455
Ctrl MO C-C	Clone- Clone	h3b5	6.484	193.682	120.358	359.324	10.455
Ctrl MO C-C	Clone- Clone	h3b5	6.484	169.271	108.97	323.719	10.455
Ctrl MO C-C	Clone- Clone
Ctrl MO C-C	Clone- Clone	h3b6	5.511	385.378	143.74	1727.448	8.874
Ctrl MO C-C	Clone- Clone	h3b6	5.511	417.985	133.354	1225.205	8.874
Ctrl MO C-C	Clone- Clone	h3b6	5.511	423.552	138.3	1626.09	8.874
Ctrl MO C-C	Clone- Clone	h3b6	5.511	400.368	150.299	2186.897	8.874
Ctrl MO C-C	Clone- Clone	h3b6	5.511	338.081	150.707	2278.597	8.874
Ctrl MO C-C	Clone- Clone
Ctrl MO C-C	Clone- Clone	h4b1	8.537	882.23	263.147	2267.375	13.794
Ctrl MO C-C	Clone- Clone	h4b1	8.537	833.734	253.571	2189.854	13.794
Ctrl MO C-C	Clone- Clone	h4b1	8.537	806.308	203.925	2086.833	13.794
Ctrl MO C-C	Clone- Clone	h4b1	8.537	788.294	210.254	2041.062	13.794
Ctrl MO C-C	Clone- Clone	h4b1	8.537	751.669	197.361	2143.558	13.794
Ctrl MO C-C	Clone- Clone	h4b1	8.537	685.943	175.298	2163.793	13.794
Ctrl MO C-C	Clone- Clone	h4b1	8.537	616.639	167.74	1613.493	13.794
Ctrl MO C-C	Clone- Clone	h4b1	8.537	539.744	156.852	1604.078	13.794
Ctrl MO C-C	Clone- Clone	h4b1	8.537	464.404	153.853	1517.522	13.794
Ctrl MO C-C	Clone- Clone	h4b1	8.537	392.138	128.276	1272.776	13.794
Ctrl MO C-C	Clone- Clone
Ctrl MO C-C	Clone- Clone	h4b2	4.809	1123.458	322.169	3003.224	7.732
Ctrl MO C-C	Clone- Clone	h4b2	4.809	1072.288	398.77	3475.333	7.732
Ctrl MO C-C	Clone- Clone	h4b2	4.809	989.547	356.613	3178.749	7.732
Ctrl MO C-C	Clone- Clone	h4b2	4.809	935.115	357.448	3225.939	7.732
Ctrl MO C-C	Clone- Clone	h4b2	4.809	853.702	291.792	2746.647	7.732
Ctrl MO C-C	Clone- Clone	h4b2	4.809	719.465	236.027	2676.483	7.732
Ctrl MO C-C	Clone- Clone	h4b2	4.809	604.163	211.225	2622.38	7.732
Ctrl MO C-C	Clone- Clone	h4b2	4.809	527.224	194.042	2434.701	7.732
Ctrl MO C-C	Clone- Clone	h4b2	4.809	435.686	168.164	1486.259	7.732
Ctrl MO C-C	Clone- Clone	h4b2	4.809	357.681	167.965	932.497	7.732
Ctrl MO C-C	Clone- Clone
Ctrl MO C-C	Clone- Clone	h4b3	6.268	1137.735	333.588	4017.895	10.104
Ctrl MO C-C	Clone- Clone	h4b3	6.268	1041.548	342.938	3609.737	10.104
Ctrl MO C-C	Clone- Clone	h4b3	6.268	1004.828	332.527	3702.927	10.104
Ctrl MO C-C	Clone- Clone	h4b3	6.268	909.651	391.412	2515.32	10.104
Ctrl MO C-C	Clone- Clone	h4b3	6.268	768.002	390.662	1643.475	10.104
Ctrl MO C-C	Clone- Clone	h4b3	6.268	660.002	315.194	1357.587	10.104
Ctrl MO C-C	Clone- Clone	h4b3	6.268	588.541	235.124	1551.414	10.104
Ctrl MO C-C	Clone- Clone	h4b3	6.268	530.344	231.772	1505.409	10.104
Ctrl MO C-C	Clone- Clone
Ctrl MO C-C	Clone- Clone	h4b4	5.349	923.775	372.894	2037.484	8.61
Ctrl MO C-C	Clone- Clone	h4b4	5.349	867.53	391.238	1775.517	8.61
Ctrl MO C-C	Clone- Clone	h4b4	5.349	804.462	292.614	1955.254	8.61
Ctrl MO C-C	Clone- Clone	h4b4	5.349	721.24	323.999	2211.746	8.61
Ctrl MO C-C	Clone- Clone	h4b4	5.349	663.269	291.517	2065.681	8.61
Ctrl MO C-C	Clone- Clone	h4b4	5.349	617.856	239.823	1910.508	8.61
Ctrl MO C-C	Clone- Clone
Ctrl MO C-C	Clone- Clone	h4b5	10.645	920.366	229.97	2894.943	17.22
Ctrl MO C-C	Clone- Clone	h4b5	10.645	861.319	251.586	2396.669	17.22
Ctrl MO C-C	Clone- Clone	h4b5	10.645	760.503	256.089	2913.239	17.22
Ctrl MO C-C	Clone- Clone	h4b5	10.645	725.522	238.644	2818.747	17.22
Ctrl MO C-C	Clone- Clone	h4b5	10.645	648.447	261.285	2943.152	17.22
Ctrl MO C-C	Clone- Clone	h4b5	10.645	541.919	187.153	3238.656	17.22
Ctrl MO C-C	Clone- Clone	h4b5	10.645	468.557	172.913	2626.493	17.22
Ctrl MO C-C	Clone- Clone	h4b5	10.645	407.485	164.321	1857.744	17.22
Ctrl MO C-C	Clone- Clone
Ctrl MO C-C	Clone- Clone	h4b6	8.754	773.052	219.756	1766.778	14.145
Ctrl MO C-C	Clone- Clone	h4b6	8.754	634.166	232.368	1395.403	14.145
Ctrl MO C-C	Clone- Clone	h4b6	8.754	556.879	192.159	1164.548	14.145
Ctrl MO C-C	Clone- Clone	h4b6	8.754	526.826	230.443	1298.649	14.145
Ctrl MO C-C	Clone- Clone	h4b6	8.754	468.986	187.341	1457.015	14.145
Ctrl MO C-C	Clone- Clone	h4b6	8.754	422.703	177.166	1337.972	14.145
Ctrl MO C-C	Clone- Clone	h4b6	8.754	417.227	163.934	1291.476	14.145
Ctrl MO C-C	Clone- Clone	h4b6	8.754	423.181	154.375	1777.741	14.145
Ctrl MO C-C	Clone- Clone
Ctrl MO C-C	Clone- Clone	h4b7	8.916	746.634	256.146	2123.985	14.408
Ctrl MO C-C	Clone- Clone	h4b7	8.916	786.999	273.946	2289.113	14.408
Ctrl MO C-C	Clone- Clone	h4b7	8.916	672.607	203.335	2243.026	14.408
Ctrl MO C-C	Clone- Clone	h4b7	8.916	587.996	179.296	2729.206	14.408
Ctrl MO C-C	Clone- Clone	h4b7	8.916	551.418	143.644	2385.281	14.408
Ctrl MO C-C	Clone- Clone	h4b7	8.916	536.327	147.323	2327.617	14.408
Ctrl MO C-C	Clone- Clone	h4b7	8.916	488.18	151.967	2006.752	14.408
Ctrl MO C-C	Clone- Clone	h4b7	8.916	430.054	122.311	1833.532	14.408
Ctrl MO C-C	Clone- Clone	h4b7	8.916	372.975	113.354	1561.241	14.408
Ctrl MO C-C	Clone- Clone
Ctrl MO C-C	Clone- Clone	h4b8	4.809	848.057	301.778	1819.98	7.731
Ctrl MO C-C	Clone- Clone	h4b8	4.809	879.875	326.765	1806.757	7.731
Ctrl MO C-C	Clone- Clone	h4b8	4.809	810.977	316.202	1702.474	7.731
Ctrl MO C-C	Clone- Clone	h4b8	4.809	772.255	304.334	1554.612	7.731
Ctrl MO C-C	Clone- Clone	h4b8	4.809	671.1	259.136	1202.265	7.731
Ctrl MO C-C	Clone- Clone	h4b8	4.809	529.841	238.347	815.629	7.731
Ctrl MO C-C	Clone- Clone	h4b8	4.809	423.509	246.113	826.057	7.731
Ctrl MO C-C	Clone- Clone	h4b8	4.809	358.923	201.09	1017.606	7.731
Ctrl MO C-C	Clone- Clone	h4b8	4.809	305.973	192.575	744.673	7.731
Ctrl MO C-C	Clone- Clone
Ctrl MO C-C	Clone- Clone	h4b9	8.97	652.006	216.955	2366.845	14.497
Ctrl MO C-C	Clone- Clone	h4b9	8.97	729.103	235.793	2752.101	14.497
Ctrl MO C-C	Clone- Clone	h4b9	8.97	798.241	242.931	3171.768	14.497
Ctrl MO C-C	Clone- Clone	h4b9	8.97	823.74	220.537	2875.428	14.497
Ctrl MO C-C	Clone- Clone	h4b9	8.97	783.364	189.831	2205.18	14.497
Ctrl MO C-C	Clone- Clone	h4b9	8.97	736.255	205.98	2121.636	14.497
Ctrl MO C-C	Clone- Clone	h4b9	8.97	647.562	166.972	1948.493	14.497
Ctrl MO C-C	Clone- Clone	h4b9	8.97	570.898	185.039	1547.177	14.497
Ctrl MO C-C	Clone- Clone	h4b9	8.97	493.05	157.762	1335.12	14.497
Ctrl MO C-C	Clone- Clone	h4b9	8.97	415.898	180.981	1291.489	14.497
Ctrl MO C-C	Clone- Clone
Ctrl MO C-C	Clone- Clone	h4b10	10.969	655.448	185.309	2753.133	17.746
Ctrl MO C-C	Clone- Clone	h4b10	10.969	675.108	192.95	2360.84	17.746
Ctrl MO C-C	Clone- Clone	h4b10	10.969	661.228	211.506	2302.645	17.746
Ctrl MO C-C	Clone- Clone	h4b10	10.969	657.601	201.216	2876.621	17.746
Ctrl MO C-C	Clone- Clone	h4b10	10.969	648.549	228.804	2635.978	17.746
Ctrl MO C-C	Clone- Clone	h4b10	10.969	606.926	199.265	2498.132	17.746
Ctrl MO C-C	Clone- Clone	h4b10	10.969	541.042	197.093	1979.936	17.746
Ctrl MO C-C	Clone- Clone	h4b10	10.969	474.987	174.65	1314.214	17.746
Ctrl MO C-C	Clone- Clone	h4b10	10.969	413.371	158.855	1047.937	17.746
Ctrl MO C-C	Clone- Clone	h4b10	10.969	352.852	161.887	1055.164	17.746
Ctrl MO C-C	Clone- Clone	h4b10	10.969	304.307	139.214	953.115	17.746
Ctrl MO C-C	Clone- Clone	h4b10	10.969	276.074	110.283	1068.053	17.746
Ctrl MO C-C	Clone- Clone	h5b1	10.483	680.376	218.884	1910.955	16.957
Ctrl MO C-C	Clone- Clone	h5b1	10.483	700.968	189.111	1874.144	16.957
Ctrl MO C-C	Clone- Clone	h5b1	10.483	592.662	211.628	1962.286	16.957
Ctrl MO C-C	Clone- Clone	h5b1	10.483	422.816	178.626	1182.751	16.957
Ctrl MO C-C	Clone- Clone	h5b1	10.483	319.358	132.798	1154.492	16.957
Ctrl MO C-C	Clone- Clone	h5b1	10.483	262.344	117.994	1144.569	16.957
Ctrl MO C-C	Clone- Clone	h6b1	6.808	792.215	220.487	1916.117	10.982
Ctrl MO C-C	Clone- Clone	h6b1	6.808	809.092	238.906	2102.698	10.982
Ctrl MO C-C	Clone- Clone	h6b1	6.808	818.011	211.726	2410.501	10.982
Ctrl MO C-C	Clone- Clone	h6b1	6.808	812.461	222.026	2703.21	10.982
Ctrl MO C-C	Clone- Clone	h6b1	6.808	648.333	184.839	2019.136	10.982
Ctrl MO C-C	Clone- Clone	h6b1	6.808	415.521	151.067	762.273	10.982
Ctrl MO C-C	Clone- Clone	h6b1	6.808	262.272	129.974	535.021	10.982
Ctrl MO C-C	Clone- Clone	h6b1	6.808	210.455	129.703	588.014	10.982
Ctrl MO C-C	Clone- Clone
Ctrl MO C-C	Clone- Clone	h6b2	5.89	812.368	242.955	2103.073	9.488
Ctrl MO C-C	Clone- Clone	h6b2	5.89	798.555	211.18	3036.388	9.488
Ctrl MO C-C	Clone- Clone	h6b2	5.89	711.74	192.091	2199.504	9.488
Ctrl MO C-C	Clone- Clone	h6b2	6.484	794.444	280.13	2323.043	10.455
Ctrl MO C-C	Clone- Clone	h6b2	6.484	461.431	249.097	874.903	10.455
Ctrl MO C-C	Clone- Clone	h6b2	6.484	276.49	149.643	428.267	10.455
Ctrl MO C-C	Clone- Clone	h6b2	6.484	220.743	130.558	540.994	10.455
Ctrl MO C-C	Clone- Clone	h7b1	9.294	580.246	146.784	3027.456	15.024
Ctrl MO C-C	Clone- Clone	h7b1	9.294	621.53	155.159	2664.112	15.024
Ctrl MO C-C	Clone- Clone	h7b1	9.294	584.537	150.549	2450.987	15.024
Ctrl MO C-C	Clone- Clone	h7b1	9.294	480.989	163.906	2415.168	15.024
Ctrl MO C-C	Clone- Clone	h7b1	9.294	417.163	160.411	1686.911	15.024
Ctrl MO C-C	Clone- Clone	h7b1	9.294	359.013	141.019	864.045	15.024
Ctrl MO C-C	Clone- Clone	h7b1	9.294	319.129	136.487	1318.321	15.024
Ctrl MO C-C	Clone- Clone	h7b1	9.294	288.958	130.175	1356.531	15.024
Ctrl MO C-C	Clone- Clone
Ctrl MO C-C	Clone- Clone	h8b1	9.024	536.351	187.432	1659.188	14.585
Ctrl MO C-C	Clone- Clone	h8b1	9.024	584.722	181.329	1819.867	14.585
Ctrl MO C-C	Clone- Clone	h8b1	9.024	603.641	177.023	2305.948	14.585
Ctrl MO C-C	Clone- Clone	h8b1	9.024	585.881	173.397	3461.508	14.585
Ctrl MO C-C	Clone- Clone	h8b1	9.024	483.891	170.313	3880.459	14.585
Ctrl MO C-C	Clone- Clone	h8b1	9.024	307.752	140.505	1709.337	14.585
Ctrl MO C-C	Clone- Clone	h8b1	9.024	207.076	114.403	968.596	14.585
Ctrl MO N-C	Non Clone- Clone	h1b1	9.294	551.843	186.166	1630.903	15.024
Ctrl MO N-C	Non Clone- Clone	h1b1	9.294	596.865	194.355	1578.28	15.024
Ctrl MO N-C	Non Clone- Clone	h1b1	9.294	609.004	170.176	1498.912	15.024
Ctrl MO N-C	Non Clone- Clone	h1b1	9.294	590.55	153.846	1865.953	15.024
Ctrl MO N-C	Non Clone- Clone	h1b1	9.294	560.516	168.216	2530.847	15.024
Ctrl MO N-C	Non Clone- Clone	h1b1	9.294	510.55	173.343	2719.615	15.024
Ctrl MO N-C	Non Clone- Clone	h1b1	9.294	449.061	167.205	1994.641	15.024
Ctrl MO N-C	Non Clone- Clone	h1b1	9.294	406.805	165.163	1336.439	15.024
Ctrl MO N-C	Non Clone- Clone	h1b1	9.294	378.636	150.736	1256.59	15.024
Ctrl MO N-C	Non Clone- Clone	h1b1	9.294	359.697	136.998	1284.273	15.024
Ctrl MO N-C	Non Clone- Clone
Ctrl MO N-C	Non Clone- Clone	h1b2	10.375	552.4	117.16	2954.583	16.781
Ctrl MO N-C	Non Clone- Clone	h1b2	10.375	556.076	145.595	3940.464	16.781
Ctrl MO N-C	Non Clone- Clone	h1b2	10.375	538.401	144.938	4094.938	16.781
Ctrl MO N-C	Non Clone- Clone	h1b2	10.375	484.461	138.685	2742.751	16.781
Ctrl MO N-C	Non Clone- Clone	h1b2	10.375	439.643	136.789	1885.159	16.781
Ctrl MO N-C	Non Clone- Clone	h1b2	10.375	398.274	131.801	1456.481	16.781
Ctrl MO N-C	Non Clone- Clone	h1b2	10.375	345.117	124.397	1222.953	16.781
Ctrl MO N-C	Non Clone- Clone	h1b2	10.375	281.866	119.954	732.734	16.781
Ctrl MO N-C	Non Clone- Clone	h1b2	10.375	230.495	116.367	558.907	16.781
Ctrl MO N-C	Non Clone- Clone	h1b2	10.375	204.067	106.219	502.743	16.781
Ctrl MO N-C	Non Clone- Clone
Ctrl MO N-C	Non Clone- Clone	h1b3	10.969	438.51	132.55	2980.427	17.747
Ctrl MO N-C	Non Clone- Clone	h1b3	10.969	419.26	124.976	3853.304	17.747
Ctrl MO N-C	Non Clone- Clone	h1b3	10.969	381.41	124.907	3706.078	17.747
Ctrl MO N-C	Non Clone- Clone	h1b3	10.969	337.815	126.611	1595.816	17.747
Ctrl MO N-C	Non Clone- Clone	h1b3	10.969	287.486	117.301	931.656	17.747
Ctrl MO N-C	Non Clone- Clone	h1b3	10.969	257.805	126.539	631.045	17.747
Ctrl MO N-C	Non Clone- Clone	h1b3	10.969	240.037	136.968	582.549	17.747
Ctrl MO N-C	Non Clone- Clone
Ctrl MO N-C	Non Clone- Clone	h1b4	6.106	510.878	157.629	1148.148	9.84
Ctrl MO N-C	Non Clone- Clone	h1b4	6.106	543.701	160.282	1208.815	9.84
Ctrl MO N-C	Non Clone- Clone	h1b4	6.106	544.013	170.549	1197.613	9.84
Ctrl MO N-C	Non Clone- Clone	h1b4	6.106	460.795	209.463	1007.098	9.84
Ctrl MO N-C	Non Clone- Clone	h1b4	6.106	386.318	144.38	781.545	9.84
Ctrl MO N-C	Non Clone- Clone	h1b4	6.106	351.224	150.53	854.644	9.84
Ctrl MO N-C	Non Clone- Clone	h1b4	6.106	321.265	150.548	1200.518	9.84
Ctrl MO N-C	Non Clone- Clone
Ctrl MO N-C	Non Clone- Clone	h1b5	8.645	429.331	130.895	1881.483	13.97
Ctrl MO N-C	Non Clone- Clone	h1b5	8.645	416.166	159.323	1379.899	13.97
Ctrl MO N-C	Non Clone- Clone	h1b5	8.645	387.998	161.922	981.694	13.97
Ctrl MO N-C	Non Clone- Clone	h1b5	8.645	363.329	152.512	1249.301	13.97
Ctrl MO N-C	Non Clone- Clone	h1b5	8.645	324.449	144.41	1016.141	13.97
Ctrl MO N-C	Non Clone- Clone	h1b5	8.645	273.048	124.214	826.802	13.97
Ctrl MO N-C	Non Clone- Clone	h1b5	8.645	228.643	104.524	540.132	13.97
Ctrl MO N-C	Non Clone- Clone
Ctrl MO N-C	Non Clone- Clone	h1b6	4.971	485.64	190.539	1296.269	7.995
Ctrl MO N-C	Non Clone- Clone	h1b6	4.971	493.07	158.823	1668.857	7.995
Ctrl MO N-C	Non Clone- Clone	h1b6	4.971	485.501	201.111	1865.169	7.995
Ctrl MO N-C	Non Clone- Clone	h1b6	4.971	475.679	193.426	2457.033	7.995
Ctrl MO N-C	Non Clone- Clone	h1b6	4.971	444.442	148.63	2927.812	7.995
Ctrl MO N-C	Non Clone- Clone	h1b6	4.971	388.078	143.957	2682.284	7.995
Ctrl MO N-C	Non Clone- Clone	h1b6	4.971	301.606	129.876	1348.703	7.995
Ctrl MO N-C	Non Clone- Clone
Ctrl MO N-C	Non Clone- Clone	h1b7	8.483	524.377	152.799	1625.133	13.706
Ctrl MO N-C	Non Clone- Clone	h1b7	8.483	534.105	170.58	1445.446	13.706
Ctrl MO N-C	Non Clone- Clone	h1b7	8.483	513.817	157.094	1917.421	13.706
Ctrl MO N-C	Non Clone- Clone	h1b7	9.618	509.895	171.767	1830.07	15.551
Ctrl MO N-C	Non Clone- Clone	h1b7	9.618	433.475	140.558	1464.423	15.551
Ctrl MO N-C	Non Clone- Clone	h1b7	9.618	352.485	131.264	1356.544	15.551
Ctrl MO N-C	Non Clone- Clone	h1b7	9.618	281.364	102.685	1508.548	15.551
Ctrl MO N-C	Non Clone- Clone	h1b7	9.618	233.905	110.011	1369.693	15.551
Ctrl MO N-C	Non Clone- Clone	h1b7	9.618	196.895	107.588	644.339	15.551
Ctrl MO N-C	Non Clone- Clone
Ctrl MO N-C	Non Clone- Clone	h1b8	10.861	463.083	151.639	2137.714	17.572
Ctrl MO N-C	Non Clone- Clone	h1b8	10.861	517.621	164.931	2451.575	17.572
Ctrl MO N-C	Non Clone- Clone	h1b8	10.861	514.292	118.902	2113.714	17.572
Ctrl MO N-C	Non Clone- Clone	h1b8	10.861	439.644	157.162	1886.715	17.572
Ctrl MO N-C	Non Clone- Clone	h1b8	10.861	338.618	146.341	2079.442	17.572
Ctrl MO N-C	Non Clone- Clone	h1b8	10.861	248.218	134.624	1184.729	17.572
Ctrl MO N-C	Non Clone- Clone	h1b8	10.861	199.202	110.11	674.263	17.572
Ctrl MO N-C	Non Clone- Clone
Ctrl MO N-C	Non Clone- Clone	h1b9	8.321	484.995	135.969	1936.542	13.44
Ctrl MO N-C	Non Clone- Clone	h1b9	8.321	470.325	161.157	1857.516	13.44
Ctrl MO N-C	Non Clone- Clone	h1b9	8.321	442.231	168.405	2155.61	13.44
Ctrl MO N-C	Non Clone- Clone	h1b9	8.321	405.975	145.463	2676.08	13.44
Ctrl MO N-C	Non Clone- Clone	h1b9	8.321	348.499	145.207	2448.418	13.44
Ctrl MO N-C	Non Clone- Clone	h1b9	8.321	283.452	117.449	1279.18	13.44
Ctrl MO N-C	Non Clone- Clone	h1b9	8.321	231.88	115.526	572.749	13.44
Ctrl MO N-C	Non Clone- Clone	h1b9	8.321	198.446	107.561	406.036	13.44
Ctrl MO N-C	Non Clone- Clone	h1b9	8.321	170.744	100.184	438.59	13.44
Ctrl MO N-C	Non Clone- Clone	h2b1	8.213	526.898	157.82	1610.842	13.267
Ctrl MO N-C	Non Clone- Clone	h2b1	8.213	529.999	150.67	1682.38	13.267
Ctrl MO N-C	Non Clone- Clone	h2b1	8.213	505.507	168.094	2659.933	13.267
Ctrl MO N-C	Non Clone- Clone	h2b1	8.213	487.541	165.871	3498.858	13.267
Ctrl MO N-C	Non Clone- Clone	h2b1	8.213	474.955	141.027	3874.406	13.267
Ctrl MO N-C	Non Clone- Clone	h2b1	8.213	460.413	141.82	3786.508	13.267
Ctrl MO N-C	Non Clone- Clone	h2b1	8.213	441.743	134.794	1594.996	13.267
Ctrl MO N-C	Non Clone- Clone	h2b1	8.213	425.175	127.836	1282.193	13.267
Ctrl MO N-C	Non Clone- Clone	h2b1	8.213	403.368	126.552	1380.794	13.267
Ctrl MO N-C	Non Clone- Clone
Ctrl MO N-C	Non Clone- Clone	h2b2	9.726	354.918	124.56	2521.413	15.727
Ctrl MO N-C	Non Clone- Clone	h2b2	9.726	348.63	132.594	2857.448	15.727
Ctrl MO N-C	Non Clone- Clone	h2b2	9.726	327.056	118.717	2987.774	15.727
Ctrl MO N-C	Non Clone- Clone	h2b2	5.62	419.424	169.742	1768.145	9.049
Ctrl MO N-C	Non Clone- Clone	h2b2	5.62	478.817	164.464	3499.398	9.049
Ctrl MO N-C	Non Clone- Clone	h2b2	5.62	509.4	203.48	3889.736	9.049
Ctrl MO N-C	Non Clone- Clone	h2b2	5.62	484.627	204.046	2793.749	9.049
Ctrl MO N-C	Non Clone- Clone	h2b2	5.62	390.465	190.138	886.356	9.049
Ctrl MO N-C	Non Clone- Clone	h2b2	5.62	284.153	156.842	562.398	9.049
Ctrl MO N-C	Non Clone- Clone
Ctrl MO N-C	Non Clone- Clone	h2b3	9.078	519.522	159.995	1561.037	14.672
Ctrl MO N-C	Non Clone- Clone	h2b3	9.078	500.949	135.192	1665.598	14.672
Ctrl MO N-C	Non Clone- Clone	h2b3	9.078	486.762	168.415	1959.292	14.672
Ctrl MO N-C	Non Clone- Clone	h2b3	9.078	462.862	162.312	1900.072	14.672
Ctrl MO N-C	Non Clone- Clone	h2b3	9.078	442.228	145.909	1710.983	14.672
Ctrl MO N-C	Non Clone- Clone	h2b3	9.078	425.972	133.401	1522.133	14.672
Ctrl MO N-C	Non Clone- Clone	h2b3	9.078	378.944	122.7	994.685	14.672
Ctrl MO N-C	Non Clone- Clone	h2b3	9.078	306.139	117.331	1730.42	14.672
Ctrl MO N-C	Non Clone- Clone	h2b3	9.078	246.907	114.803	1988.379	14.672
Ctrl MO N-C	Non Clone- Clone	h2b3	9.078	209.775	107.789	1135.541	14.672
Ctrl MO N-C	Non Clone- Clone
Ctrl MO N-C	Non Clone- Clone	h2b4	10.321	473.212	155.368	2045.916	16.693
Ctrl MO N-C	Non Clone- Clone	h2b4	10.321	457.417	140.072	2167.41	16.693
Ctrl MO N-C	Non Clone- Clone	h2b4	10.321	441.958	124.482	2115.916	16.693
Ctrl MO N-C	Non Clone- Clone	h2b4	10.321	404.027	117.456	2039.917	16.693
Ctrl MO N-C	Non Clone- Clone	h2b4	10.321	333.774	111.071	1926.836	16.693
Ctrl MO N-C	Non Clone- Clone	h2b4	10.321	262.388	104.28	1557.053	16.693
Ctrl MO N-C	Non Clone- Clone	h2b4	10.321	213.756	98.707	947.955	16.693
Ctrl MO N-C	Non Clone- Clone	h2b4	10.321	170.197	101.155	496.908	16.693
Ctrl MO N-C	Non Clone- Clone
Ctrl MO N-C	Non Clone- Clone	h2b5	8.537	487.946	172.398	1365.566	13.794
Ctrl MO N-C	Non Clone- Clone	h2b5	8.537	446.34	131.785	1084.714	13.794
Ctrl MO N-C	Non Clone- Clone	h2b5	8.537	409.966	136.663	1045.002	13.794
Ctrl MO N-C	Non Clone- Clone	h2b5	8.537	368.997	129.568	984.532	13.794
Ctrl MO N-C	Non Clone- Clone	h2b5	8.537	307.512	111.571	794.844	13.794
Ctrl MO N-C	Non Clone- Clone	h2b5	8.537	253.866	122.006	642.195	13.794
Ctrl MO N-C	Non Clone- Clone	h2b5	8.537	208.304	104.631	441.839	13.794
Ctrl MO N-C	Non Clone- Clone
Ctrl MO N-C	Non Clone- Clone	h3b1	8.645	680.475	178.892	4095	13.97
Ctrl MO N-C	Non Clone- Clone	h3b1	8.645	636.649	195.899	3899.747	13.97
Ctrl MO N-C	Non Clone- Clone	h3b1	8.645	421.643	171.07	1375.055	13.97
Ctrl MO N-C	Non Clone- Clone	h3b1	8.645	293.034	125.212	950.146	13.97
Ctrl MO N-C	Non Clone- Clone	h3b1	8.645	199.931	99.754	374.65	13.97
Ctrl MO N-C	Non Clone- Clone
Ctrl MO N-C	Non Clone- Clone	h3b2	8.159	499.036	164.324	1262.502	13.179
Ctrl MO N-C	Non Clone- Clone	h3b2	8.159	460.82	193.95	1224.52	13.179
Ctrl MO N-C	Non Clone- Clone	h3b2	8.159	335.343	167.251	1148.836	13.179
Ctrl MO N-C	Non Clone- Clone	h3b2	8.159	221.06	122.391	558.982	13.179
Ctrl MO N-C	Non Clone- Clone	h3b2	8.159	168.845	103.318	335.574	13.179
Ctrl MO N-C	Non Clone- Clone
Ctrl MO N-C	Non Clone- Clone	h3b3	7.403	572.723	142.096	1732.853	11.949
Ctrl MO N-C	Non Clone- Clone	h3b3	7.403	419.392	158.178	1025.835	11.949
Ctrl MO N-C	Non Clone- Clone	h3b3	7.403	258.984	146.609	529.315	11.949
Ctrl MO N-C	Non Clone- Clone	h3b3	7.403	209.283	119.767	429.107	11.949
Ctrl MO N-C	Non Clone- Clone	h3b3	7.403	180.559	110.288	443.594	11.949
Ctrl MO N-C	Non Clone- Clone
Ctrl MO N-C	Non Clone- Clone	h3b4	9.024	701.026	156.723	4095	14.585
Ctrl MO N-C	Non Clone- Clone	h3b4	9.024	592.545	157.905	4050.206	14.585
Ctrl MO N-C	Non Clone- Clone	h3b4	9.024	351.165	144.99	864.971	14.585
Ctrl MO N-C	Non Clone- Clone	h3b4	9.024	264.975	136.443	561.472	14.585
Ctrl MO N-C	Non Clone- Clone	h3b4	9.024	216.676	113.441	510.393	14.585
Ctrl MO N-C	Non Clone- Clone
Ctrl MO N-C	Non Clone- Clone	h3b5	9.78	585.815	164.579	4087.308	15.815
Ctrl MO N-C	Non Clone- Clone	h3b5	9.78	486.668	144.376	1986.201	15.815
Ctrl MO N-C	Non Clone- Clone	h3b5	9.78	331.252	159.099	1292.949	15.815
Ctrl MO N-C	Non Clone- Clone	h3b5	9.78	264.622	116.086	951.38	15.815
Ctrl MO N-C	Non Clone- Clone	h3b5	9.78	232.109	111.335	962.617	15.815
Ctrl MO N-C	Non Clone- Clone
Ctrl MO N-C	Non Clone- Clone	h3b6	7.241	622.53	208.239	1565.736	11.685
Ctrl MO N-C	Non Clone- Clone	h3b6	7.241	474.052	193.986	1335.269	11.685
Ctrl MO N-C	Non Clone- Clone	h3b6	7.241	359	154.995	982.751	11.685
Ctrl MO N-C	Non Clone- Clone	h3b6	7.241	285.317	155.478	777.656	11.685
Ctrl MO N-C	Non Clone- Clone	h3b6	7.241	238.053	131.081	655.685	11.685
Ctrl MO N-C	Non Clone- Clone
Ctrl MO N-C	Non Clone- Clone	h3b7	9.024	561.026	179.418	2753.37	14.585
Ctrl MO N-C	Non Clone- Clone	h3b7	9.024	516.03	164.684	1219.644	14.585
Ctrl MO N-C	Non Clone- Clone	h3b7	9.024	402.926	159.903	778.577	14.585
Ctrl MO N-C	Non Clone- Clone	h3b7	9.024	296.71	156.749	664.906	14.585
Ctrl MO N-C	Non Clone- Clone	h3b7	9.024	248.308	130.922	632.867	14.585
Ctrl MO N-C	Non Clone- Clone	h3b7	9.024	202.772	116.013	652.107	14.585
Ctrl MO N-C	Non Clone- Clone	h4b1	9.132	800.623	186.077	2274.052	14.76
Ctrl MO N-C	Non Clone- Clone	h4b1	9.132	704.976	172.836	1950.47	14.76
Ctrl MO N-C	Non Clone- Clone	h4b1	9.132	544.493	149.129	1361.606	14.76
Ctrl MO N-C	Non Clone- Clone	h4b1	9.132	450.155	168.106	1184.954	14.76
Ctrl MO N-C	Non Clone- Clone	h4b1	9.132	420.246	160.835	1228.404	14.76
Ctrl MO N-C	Non Clone- Clone	h4b1	9.132	353.364	141.809	1024.14	14.76
Ctrl MO N-C	Non Clone- Clone	h4b1	9.132	280.124	140.588	896.186	14.76
Ctrl MO N-C	Non Clone- Clone
Ctrl MO N-C	Non Clone- Clone	h4b2	7.078	727.314	161.522	3737.615	11.422
Ctrl MO N-C	Non Clone- Clone	h4b2	7.078	647.009	190.204	3788.002	11.422
Ctrl MO N-C	Non Clone- Clone	h4b2	7.078	485.798	150.111	1434.031	11.422
Ctrl MO N-C	Non Clone- Clone	h4b2	7.078	393.468	161.814	860.24	11.422
Ctrl MO N-C	Non Clone- Clone	h4b2	7.078	363.941	174.48	783.291	11.422
Ctrl MO N-C	Non Clone- Clone	h4b2	7.078	305.459	161.282	551.525	11.422
Ctrl MO N-C	Non Clone- Clone
Ctrl MO N-C	Non Clone- Clone	h4b3	4.809	757.449	300.95	1679.624	7.732
Ctrl MO N-C	Non Clone- Clone	h4b3	4.809	579.288	260.391	1121.878	7.732
Ctrl MO N-C	Non Clone- Clone	h4b3	4.809	476.787	231.779	996.585	7.732
Ctrl MO N-C	Non Clone- Clone	h4b3	4.809	436.068	220.282	853.521	7.732
Ctrl MO N-C	Non Clone- Clone	h4b3	4.809	369.951	187.026	673.667	7.732
Ctrl MO N-C	Non Clone- Clone	h4b3	4.809	291.725	169.578	482.863	7.732
Ctrl MO N-C	Non Clone- Clone
Ctrl MO N-C	Non Clone- Clone	h4b4	8.321	746.971	162.932	2307.839	13.442
Ctrl MO N-C	Non Clone- Clone	h4b4	8.321	606.599	162	1743.368	13.442
Ctrl MO N-C	Non Clone- Clone	h4b4	8.321	490.08	130.466	1244.591	13.442
Ctrl MO N-C	Non Clone- Clone	h4b4	8.321	454.305	142.926	1125.436	13.442
Ctrl MO N-C	Non Clone- Clone	h4b4	8.321	375.829	142.854	755.268	13.442
Ctrl MO N-C	Non Clone- Clone	h4b4	8.321	287.498	133.684	510.699	13.442
Ctrl MO N-C	Non Clone- Clone	h4b4	8.321	238.515	126.69	408.231	13.442
Ctrl MO N-C	Non Clone- Clone
Ctrl MO N-C	Non Clone- Clone	h4b5	9.726	834.152	213.532	4092.553	15.727
Ctrl MO N-C	Non Clone- Clone	h4b5	9.726	767.229	196.785	4095	15.727
Ctrl MO N-C	Non Clone- Clone	h4b5	9.726	684.696	202.659	4060.823	15.727
Ctrl MO N-C	Non Clone- Clone	h4b5	9.726	645.137	179.908	3751.308	15.727
Ctrl MO N-C	Non Clone- Clone	h4b5	9.726	573.664	196.836	2328.864	15.727
Ctrl MO N-C	Non Clone- Clone	h4b5	9.726	494.125	178.151	1244.696	15.727
Ctrl MO N-C	Non Clone- Clone	h4b5	9.726	430.958	160.459	1380.956	15.727
Ctrl MO N-C	Non Clone- Clone	h4b5	9.726	374.764	131.621	1188.519	15.727
Ctrl MO N-C	Non Clone- Clone	h4b5	9.726	330.773	144.548	1153.842	15.727
Ctrl MO N-C	Non Clone- Clone
Ctrl MO N-C	Non Clone- Clone	h4b6	6.052	910.412	278.312	2579.261	9.752
Ctrl MO N-C	Non Clone- Clone	h4b6	6.052	917.153	337.685	2588.037	9.752
Ctrl MO N-C	Non Clone- Clone	h4b6	6.052	900.489	342.229	2478.42	9.752
Ctrl MO N-C	Non Clone- Clone	h4b6	6.052	890.868	382.509	2298.953	9.752
Ctrl MO N-C	Non Clone- Clone	h4b6	6.052	821.982	325.945	1669.732	9.752
Ctrl MO N-C	Non Clone- Clone	h4b6	6.052	742.08	260.145	1577.494	9.752
Ctrl MO N-C	Non Clone- Clone	h4b6	6.052	644.525	236.358	1353.062	9.752
Ctrl MO N-C	Non Clone- Clone	h4b6	6.052	547.568	242.38	1052.948	9.752
Ctrl MO N-C	Non Clone- Clone	h4b6	6.052	444.267	170.033	794.115	9.752
Ctrl MO N-C	Non Clone- Clone
Ctrl MO N-C	Non Clone- Clone	h4b7	10.212	784.993	169.318	3062.076	16.517
Ctrl MO N-C	Non Clone- Clone	h4b7	10.212	771.705	249.866	3056.032	16.517
Ctrl MO N-C	Non Clone- Clone	h4b7	10.212	714.188	188.261	2344.25	16.517
Ctrl MO N-C	Non Clone- Clone	h4b7	10.212	655.456	218.839	1979.501	16.517
Ctrl MO N-C	Non Clone- Clone	h4b7	10.212	578.787	222.333	2565.7	16.517
Ctrl MO N-C	Non Clone- Clone	h4b7	10.212	505.122	170.757	2662.135	16.517
Ctrl MO N-C	Non Clone- Clone	h4b7	10.212	435.546	131.368	2457.286	16.517
Ctrl MO N-C	Non Clone- Clone	h4b7	10.212	378.272	111.4	1608.287	16.517
Ctrl MO N-C	Non Clone- Clone	h4b7	10.212	332.249	117.966	1362.39	16.517
Ctrl MO N-C	Non Clone- Clone	h5b1	9.132	649.365	200.874	1826.929	14.76
Ctrl MO N-C	Non Clone- Clone	h5b1	9.132	527.757	160.483	1664.037	14.76
Ctrl MO N-C	Non Clone- Clone	h5b1	9.132	374.205	149.94	2190.597	14.76
Ctrl MO N-C	Non Clone- Clone	h5b1	9.132	281.732	132.085	1294.95	14.76
Ctrl MO N-C	Non Clone- Clone
Ctrl MO N-C	Non Clone- Clone	h5b2	6.43	802.994	205.42	4095	10.367
Ctrl MO N-C	Non Clone- Clone	h5b2	6.43	708.093	245.666	1884.111	10.367
Ctrl MO N-C	Non Clone- Clone	h5b2	6.43	496.596	180.08	1428.414	10.367
Ctrl MO N-C	Non Clone- Clone	h5b2	6.43	323.135	141.835	1016.196	10.367
Ctrl MO N-C	Non Clone- Clone
Ctrl MO N-C	Non Clone- Clone	h5b3	4.161	594.496	128.365	1604.487	6.677
Ctrl MO N-C	Non Clone- Clone	h5b3	4.161	553.869	174.81	1471.914	6.677
Ctrl MO N-C	Non Clone- Clone	h5b3	4.161	437.21	189.332	1467.095	6.677
Ctrl MO N-C	Non Clone- Clone	h5b3	4.161	322.878	137.175	876.867	6.677
Ctrl MO N-C	Non Clone- Clone	h5b3	4.161	262.604	122.328	927.585	6.677
Ctrl MO N-C	Non Clone- Clone
Ctrl MO N-C	Non Clone- Clone	h5b4	9.348	551.622	141.753	1655.496	15.111
Ctrl MO N-C	Non Clone- Clone	h5b4	9.348	520.683	145.331	1361.996	15.111
Ctrl MO N-C	Non Clone- Clone	h5b4	9.348	447.25	164.035	1043.087	15.111
Ctrl MO N-C	Non Clone- Clone	h5b4	9.348	352.113	158.563	1275.408	15.111
Ctrl MO N-C	Non Clone- Clone	h5b4	9.348	268.455	132.991	548.361	15.111
Ctrl MO N-C	Non Clone- Clone
Ctrl MO N-C	Non Clone- Clone	h5b5	6.268	523.182	224.943	1455.631	10.103
Ctrl MO N-C	Non Clone- Clone	h5b5	6.268	454.293	202.836	1449.181	10.103
Ctrl MO N-C	Non Clone- Clone	h5b5	6.268	338.776	150.443	1051.416	10.103
Ctrl MO N-C	Non Clone- Clone	h5b5	6.268	289.21	133.474	1835.845	10.103
Ctrl MO N-C	Non Clone- Clone
Ctrl MO N-C	Non Clone- Clone	h5b6	4.647	690.211	202.513	2198.506	7.468
Ctrl MO N-C	Non Clone- Clone	h5b6	4.647	763.327	256.155	1644.962	7.468
Ctrl MO N-C	Non Clone- Clone	h5b6	4.647	726.907	203.408	1951.334	7.468
Ctrl MO N-C	Non Clone- Clone	h5b6	4.647	604.097	204.541	1412.856	7.468
Ctrl MO N-C	Non Clone- Clone	h5b6	4.647	471.97	181.421	1216.658	7.468
Ctrl MO N-C	Non Clone- Clone
Ctrl MO N-C	Non Clone- Clone	h5b7	6.646	701.518	181.827	2648.285	10.708
Ctrl MO N-C	Non Clone- Clone	h5b7	6.646	481.085	192.875	989.691	10.708
Ctrl MO N-C	Non Clone- Clone	h5b7	6.646	369.703	158.891	1704.372	10.708
Ctrl MO N-C	Non Clone- Clone	h5b7	6.646	347.095	125.396	1871.693	10.708
Ctrl MO N-C	Non Clone- Clone	h6b3	7.673	1106.499	382.024	2600.22	12.388
Ctrl MO N-C	Non Clone- Clone	h6b3	7.673	1026.552	318.104	2271.424	12.388
Ctrl MO N-C	Non Clone- Clone	h6b3	7.673	800.117	275.582	1760.899	12.388
Ctrl MO N-C	Non Clone- Clone	h6b3	7.673	521.831	197.658	1323.565	12.388
Ctrl MO N-C	Non Clone- Clone	h6b3	7.673	321.466	181.706	596.742	12.388
Ctrl MO N-C	Non Clone- Clone	h6b3	7.673	230.242	133.445	362.726	12.388
Ctrl MO N-C	Non Clone- Clone
Ctrl MO N-C	Non Clone- Clone	h6b4	6.16	1069.448	381.907	2804.932	9.927
Ctrl MO N-C	Non Clone- Clone	h6b4	6.16	1265.665	385.156	3207.771	9.927
Ctrl MO N-C	Non Clone- Clone	h6b4	6.16	1338.564	346.683	3166.522	9.927
Ctrl MO N-C	Non Clone- Clone	h6b4	6.16	1153.014	238.762	2378.572	9.927
Ctrl MO N-C	Non Clone- Clone	h6b4	6.16	833.142	282.072	2216.103	9.927
Ctrl MO N-C	Non Clone- Clone	h6b4	6.16	514.862	194.021	1526.716	9.927
Ctrl MO N-C	Non Clone- Clone	h6b4	6.16	312.684	150.059	729.001	9.927
Ctrl MO N-C	Non Clone- Clone
Ctrl MO N-C	Non Clone- Clone	h6b5	5.349	1156.022	334.001	2501.886	8.61
Ctrl MO N-C	Non Clone- Clone	h6b5	5.349	1226.936	317.958	3160.55	8.61
Ctrl MO N-C	Non Clone- Clone	h6b5	5.349	1165.186	309.439	2614.003	8.61
Ctrl MO N-C	Non Clone- Clone	h6b5	5.349	960.336	301.848	2658.701	8.61
Ctrl MO N-C	Non Clone- Clone	h6b5	5.349	705.563	211.797	1785.235	8.61
Ctrl MO N-C	Non Clone- Clone	h6b5	5.349	448.139	170.314	1019.066	8.61
Ctrl MO N-C	Non Clone- Clone	h6b5	5.349	295.907	130.971	621.945	8.61
Ctrl MO N-C	Non Clone- Clone
Ctrl MO N-C	Non Clone- Clone	h6b6	5.836	1181.675	359.239	3151.516	9.401
Ctrl MO N-C	Non Clone- Clone	h6b6	5.836	1049.931	322.611	2838.23	9.401
Ctrl MO N-C	Non Clone- Clone	h6b6	5.836	672.472	315.873	1379.762	9.401
Ctrl MO N-C	Non Clone- Clone	h6b6	5.836	370.347	206.915	613.214	9.401
Ctrl MO N-C	Non Clone- Clone	h6b6	5.836	256.359	153.713	418.532	9.401
Ctrl MO N-C	Non Clone- Clone
Ctrl MO N-C	Non Clone- Clone	h6b7	5.782	740.476	180.17	1893.065	9.313
Ctrl MO N-C	Non Clone- Clone	h6b7	5.782	736.355	206.745	1807.632	9.313
Ctrl MO N-C	Non Clone- Clone	h6b7	5.782	753.165	230.153	2246.724	9.313
Ctrl MO N-C	Non Clone- Clone	h6b7	5.782	841.465	195.722	2426.847	9.313
Ctrl MO N-C	Non Clone- Clone	h6b7	5.782	839.234	204.122	2299.078	9.313
Ctrl MO N-C	Non Clone- Clone	h6b7	5.782	709.537	215.245	1701.198	9.313
Ctrl MO N-C	Non Clone- Clone	h6b7	5.782	582.317	191.085	1325.805	9.313
Ctrl MO N-C	Non Clone- Clone
Ctrl MO N-C	Non Clone- Clone	h6b8	7.673	795.646	274.197	2316.122	12.388
Ctrl MO N-C	Non Clone- Clone	h6b8	7.673	770.238	233.59	2512.795	12.388
Ctrl MO N-C	Non Clone- Clone	h6b8	7.673	676.25	210.113	2388.663	12.388
Ctrl MO N-C	Non Clone- Clone	h6b8	7.673	582.069	215.179	1977.014	12.388
Ctrl MO N-C	Non Clone- Clone	h6b8	7.673	475.034	181.004	1177.953	12.388
Ctrl MO N-C	Non Clone- Clone	h6b8	7.673	343.526	150.55	760.408	12.388
Ctrl MO N-C	Non Clone- Clone
Ctrl MO N-C	Non Clone- Clone	h6b9	5.944	946.844	243.143	2791.316	9.577
Ctrl MO N-C	Non Clone- Clone	h6b9	5.944	1033.065	307.087	2212.18	9.577
Ctrl MO N-C	Non Clone- Clone	h6b9	5.944	1037.504	399.638	2200.621	9.577
Ctrl MO N-C	Non Clone- Clone	h6b9	5.944	844.804	342.712	1929.075	9.577
Ctrl MO N-C	Non Clone- Clone	h6b9	5.944	536.748	240.069	1112.353	9.577
Ctrl MO N-C	Non Clone- Clone	h6b9	5.944	322.584	185.35	695.823	9.577
Ctrl MO N-C	Non Clone- Clone	h6b9	5.944	222.276	140.145	376.128	9.577
Ctrl MO N-C	Non Clone- Clone	h7b2	6.43	866.814	308.29	2328.117	10.367
Ctrl MO N-C	Non Clone- Clone	h7b2	6.43	777.036	321.402	2027.218	10.367
Ctrl MO N-C	Non Clone- Clone	h7b2	6.43	595.078	223.67	1598.668	10.367
Ctrl MO N-C	Non Clone- Clone	h7b2	6.43	444.262	179.979	894.876	10.367
Ctrl MO N-C	Non Clone- Clone	h7b2	6.43	345.619	164.265	803.391	10.367
Ctrl MO N-C	Non Clone- Clone	h7b2	6.43	311.96	170.307	1307.422	10.367
Ctrl MO N-C	Non Clone- Clone
Ctrl MO N-C	Non Clone- Clone	h7b3	8.159	531.094	131.843	2469.549	13.175
Ctrl MO N-C	Non Clone- Clone	h7b3	8.159	577.257	141.659	2160.117	13.175
Ctrl MO N-C	Non Clone- Clone	h7b3	8.159	570.966	157.608	2219.339	13.175
Ctrl MO N-C	Non Clone- Clone	h7b3	8.159	525.293	166.9	2541.213	13.175
Ctrl MO N-C	Non Clone- Clone	h7b3	8.159	416.003	133.493	1220.179	13.175
Ctrl MO N-C	Non Clone- Clone	h7b3	8.159	336.009	159.733	792.919	13.175
Ctrl MO N-C	Non Clone- Clone
Ctrl MO N-C	Non Clone- Clone	h7b4	9.186	656.578	158.538	2603.523	14.848
Ctrl MO N-C	Non Clone- Clone	h7b4	9.186	596.671	202.123	2046.806	14.848
Ctrl MO N-C	Non Clone- Clone	h7b4	9.186	490.728	175.531	1245.684	14.848
Ctrl MO N-C	Non Clone- Clone	h7b4	9.186	355.94	153.94	857.91	14.848
Ctrl MO N-C	Non Clone- Clone	h7b4	9.186	295.365	155.351	721.612	14.848
Ctrl MO N-C	Non Clone- Clone	h7b4	9.186	261.507	148.578	772.843	14.848
Ctrl MO N-C	Non Clone- Clone
Ctrl MO N-C	Non Clone- Clone	h7b5	5.403	552.315	166.35	1702.919	8.698
Ctrl MO N-C	Non Clone- Clone	h7b5	5.403	518.193	149.023	1378.267	8.698
Ctrl MO N-C	Non Clone- Clone	h7b5	5.403	426.859	157.288	1237.1	8.698
Ctrl MO N-C	Non Clone- Clone	h7b5	5.403	340.354	132.524	1697.838	8.698
Ctrl MO N-C	Non Clone- Clone	h7b5	5.403	295.942	128.609	2053.654	8.698
Ctrl MO N-C	Non Clone- Clone
Ctrl MO N-C	Non Clone- Clone	h7b6	5.566	654.396	172.104	1770.464	8.962
Ctrl MO N-C	Non Clone- Clone	h7b6	5.566	609.663	182.887	1640.07	8.962
Ctrl MO N-C	Non Clone- Clone	h7b6	5.566	505.469	176.56	1376.75	8.962
Ctrl MO N-C	Non Clone- Clone	h7b6	5.566	369.757	182.116	953.475	8.962
Ctrl MO N-C	Non Clone- Clone	h7b6	5.566	294.471	126.335	720.807	8.962
Ctrl MO N-C	Non Clone- Clone	h7b6	5.566	243.079	118.647	746.6	8.962
Ctrl MO N-C	Non Clone- Clone
Ctrl MO N-C	Non Clone- Clone	h7b7	7.511	387.055	132.116	1130.085	12.125
Ctrl MO N-C	Non Clone- Clone	h7b7	7.511	346.355	116.788	1359.315	12.125
Ctrl MO N-C	Non Clone- Clone	h7b7	7.511	307.34	122.773	1628.667	12.125
Ctrl MO N-C	Non Clone- Clone	h7b7	7.457	392.358	142.534	772.682	12.037
Ctrl MO N-C	Non Clone- Clone	h7b7	7.457	303.522	161.661	731.969	12.037
Ctrl MO N-C	Non Clone- Clone	h7b7	7.457	248.586	125.413	1050.283	12.037
Ctrl MO N-C	Non Clone- Clone
Ctrl MO N-C	Non Clone- Clone	h7b8	8.213	511.22	113.767	2170.848	13.266
Ctrl MO N-C	Non Clone- Clone	h7b8	8.213	513.246	138.779	2172.212	13.266
Ctrl MO N-C	Non Clone- Clone	h7b8	8.213	471.382	145.553	1474.021	13.266
Ctrl MO N-C	Non Clone- Clone	h7b8	8.213	394.198	157.173	1028.192	13.266
Ctrl MO N-C	Non Clone- Clone	h7b8	8.213	287.246	146.595	590.612	13.266
Ctrl MO N-C	Non Clone- Clone
Ctrl MO N-C	Non Clone- Clone	h7b9	7.457	566.225	132.467	1814.627	12.036
Ctrl MO N-C	Non Clone- Clone	h7b9	7.457	498.898	161.348	1927.825	12.036
Ctrl MO N-C	Non Clone- Clone	h7b9	7.457	375.847	162.776	1060.642	12.036
Ctrl MO N-C	Non Clone- Clone	h7b9	7.457	264.202	128.4	568.821	12.036
Ctrl MO N-C	Non Clone- Clone	h7b9	7.457	223.299	125.21	418.907	12.036
Ctrl MO N-C	Non Clone- Clone
Ctrl MO N-C	Non Clone- Clone	h7b10	6.7	609.003	212.595	1679.303	10.807
Ctrl MO N-C	Non Clone- Clone	h7b10	6.7	612.218	200.804	1642.702	10.807
Ctrl MO N-C	Non Clone- Clone	h7b10	6.7	565.659	200.557	1450.231	10.807
Ctrl MO N-C	Non Clone- Clone	h7b10	6.7	462.171	186.857	1194.961	10.807
Ctrl MO N-C	Non Clone- Clone	h7b10	6.7	341.154	154.882	678.15	10.807
Ctrl MO N-C	Non Clone- Clone	h7b10	6.7	277.705	146.965	595.595	10.807
Ctrl MO N-C	Non Clone- Clone	h8b1	8.267	503.591	165.258	1451.008	13.352
Ctrl MO N-C	Non Clone- Clone	h8b1	8.267	513.773	160.593	1786.561	13.352
Ctrl MO N-C	Non Clone- Clone	h8b1	8.267	464.401	139.303	1605.715	13.352
Ctrl MO N-C	Non Clone- Clone	h8b1	8.591	730.368	194.945	2118.547	13.881
Ctrl MO N-C	Non Clone- Clone	h8b1	8.591	702.614	164.084	2103.877	13.881
Ctrl MO N-C	Non Clone- Clone	h8b1	8.591	609.622	159.586	2444.519	13.881
Ctrl MO N-C	Non Clone- Clone	h8b1	8.591	463.45	157.556	1651.214	13.881
Ctrl MO N-C	Non Clone- Clone	h8b1	8.591	295.212	121.577	775.866	13.881
Ctrl MO N-C	Non Clone- Clone	h8b1	8.591	209.291	113.452	414.724	13.881
Ctrl MO N-C	Non Clone- Clone
Ctrl MO N-C	Non Clone- Clone	h8b2	8.213	578.725	166.321	1678.265	13.266
Ctrl MO N-C	Non Clone- Clone	h8b2	8.213	602.163	172.24	1404.43	13.266
Ctrl MO N-C	Non Clone- Clone	h8b2	8.213	561.428	190.877	1322.808	13.266
Ctrl MO N-C	Non Clone- Clone	h8b2	8.213	464.924	208.632	1115.423	13.266
Ctrl MO N-C	Non Clone- Clone	h8b2	8.213	308.364	156.944	666.105	13.266
Ctrl MO N-C	Non Clone- Clone	h8b2	8.213	213.466	120.818	386.75	13.266
Ctrl MO N-C	Non Clone- Clone
Ctrl MO N-C	Non Clone- Clone	h8b3	6.322	694.718	220.04	2706.797	10.188
Ctrl MO N-C	Non Clone- Clone	h8b3	6.322	690.605	217.115	3915.144	10.188
Ctrl MO N-C	Non Clone- Clone	h8b3	6.322	653.584	193.205	3976.412	10.188
Ctrl MO N-C	Non Clone- Clone	h8b3	6.322	542.348	160.966	2788.159	10.188
Ctrl MO N-C	Non Clone- Clone	h8b3	6.322	388.994	146.327	995.309	10.188
Ctrl MO N-C	Non Clone- Clone	h8b3	6.322	276.909	127.315	835.9	10.188
Ctrl MO N-C	Non Clone- Clone
Ctrl MO N-C	Non Clone- Clone	h8b4	7.781	692.288	259.159	1937.883	12.564
Ctrl MO N-C	Non Clone- Clone	h8b4	7.781	713.265	240.943	2106.403	12.564
Ctrl MO N-C	Non Clone- Clone	h8b4	7.781	633.549	218.586	2206.955	12.564
Ctrl MO N-C	Non Clone- Clone	h8b4	7.781	527.317	202.881	1427.988	12.564
Ctrl MO N-C	Non Clone- Clone	h8b4	7.781	404.905	144.81	1121.058	12.564
Ctrl MO N-C	Non Clone- Clone	h8b4	7.781	284.778	120.566	894.126	12.564
Ctrl MO N-C	Non Clone- Clone	h8b4	7.781	211.158	108.556	610.246	12.564
Ctrl MO N-C	Non Clone- Clone
Ctrl MO N-C	Non Clone- Clone	h8b5	3.026	554.603	176.43	2082.494	4.832
Ctrl MO N-C	Non Clone- Clone	h8b5	3.026	583.341	170.742	1359.01	4.832
Ctrl MO N-C	Non Clone- Clone	h8b5	3.026	516.033	161.242	1021.269	4.832
Ctrl MO N-C	Non Clone- Clone	h8b5	3.026	393.135	185.261	654.312	4.832
Ctrl MO N-C	Non Clone- Clone	h8b5	3.026	252.613	162.156	377.899	4.832
Ctrl MO N-C	Non Clone- Clone
Ctrl MO N-C	Non Clone- Clone	h8b6	7.187	789.106	227.122	2134.65	11.597
Ctrl MO N-C	Non Clone- Clone	h8b6	7.187	761.727	233.573	2864.888	11.597
Ctrl MO N-C	Non Clone- Clone	h8b6	7.187	695.504	259.597	3335.198	11.597
Ctrl MO N-C	Non Clone- Clone	h8b6	7.187	567.29	203.54	2216.275	11.597
Ctrl MO N-C	Non Clone- Clone	h8b6	7.187	370.434	163.411	1081.172	11.597
Ctrl MO N-C	Non Clone- Clone	h8b6	7.187	244.565	108.482	719.864	11.597
Ctrl MO N-C	Non Clone- Clone
Ctrl MO N-C	Non Clone- Clone	h8b7	7.133	766.878	191.244	2024.696	11.51
Ctrl MO N-C	Non Clone- Clone	h8b7	7.133	850.543	191.288	2775.261	11.51
Ctrl MO N-C	Non Clone- Clone	h8b7	7.133	905.094	203.928	3830.221	11.51
Ctrl MO N-C	Non Clone- Clone	h8b7	7.133	870.666	182.573	3989.972	11.51
Ctrl MO N-C	Non Clone- Clone	h8b7	7.133	806.971	189.95	2835.162	11.51
Ctrl MO N-C	Non Clone- Clone	h8b7	7.133	667.574	175.836	3035.202	11.51
Ctrl MO N-C	Non Clone- Clone	h8b7	7.133	445.838	171.513	999.881	11.51
Ctrl MO N-C	Non Clone- Clone	h8b7	7.133	273.922	139.809	757.594	11.51
Ctrl MO N-C	Non Clone- Clone
Ctrl MO N-C	Non Clone- Clone	h8b8	5.403	789.004	187.844	3407.961	8.698
Ctrl MO N-C	Non Clone- Clone	h8b8	5.403	736.649	185.093	3064.139	8.698
Ctrl MO N-C	Non Clone- Clone	h8b8	5.403	579.41	159.895	1797.656	8.698
Ctrl MO N-C	Non Clone- Clone	h8b8	5.403	428.803	122.577	1969.281	8.698
Ctrl MO N-C	Non Clone- Clone	h8b8	5.403	337.085	134.747	2162.435	8.698
Ctrl MO N-C	Non Clone- Clone	h8b8	5.403	253.635	114.035	1525.697	8.698
Ctrl MO N-C	Non Clone- Clone	h8b8	5.403	181.696	106.913	375.747	8.698
Ctrl MO N-C	Non Clone- Clone
Ctrl MO N-C	Non Clone- Clone	h8b9	8.808	789.573	195.069	3408.575	14.232
Ctrl MO N-C	Non Clone- Clone	h8b9	8.808	763.684	176.671	3490.368	14.232
Ctrl MO N-C	Non Clone- Clone	h8b9	8.808	626.75	129.913	2073.581	14.232
Ctrl MO N-C	Non Clone- Clone	h8b9	8.808	535.452	125.781	2399.197	14.232
Ctrl MO N-C	Non Clone- Clone	h8b9	8.808	447.538	132.62	2198.496	14.232
Ctrl MO N-C	Non Clone- Clone	h8b9	8.808	366.815	126.237	2033.137	14.232
Ctrl MO N-C	Non Clone- Clone	h8b9	8.808	270.137	114.413	935.973	14.232
Ctrl MO N-N	Non Clone- Non Clone	h2b1	10.807	460.553	143.343	2289.583	17.484
Ctrl MO N-N	Non Clone- Non Clone	h2b1	10.807	455.671	124.894	1716.698	17.484
Ctrl MO N-N	Non Clone- Non Clone	h2b1	10.807	453.114	120.141	2544.914	17.484
Ctrl MO N-N	Non Clone- Non Clone	h2b1	10.807	438.878	122.046	2704.919	17.484
Ctrl MO N-N	Non Clone- Non Clone	h2b1	10.807	402.866	122.775	2211.2	17.484
Ctrl MO N-N	Non Clone- Non Clone	h2b1	10.807	376.721	115.366	2395.842	17.484
Ctrl MO N-N	Non Clone- Non Clone	h2b1	10.807	352.357	119.295	2321.938	17.484
Ctrl MO N-N	Non Clone- Non Clone	h2b1	10.807	326.954	122.003	1759.096	17.484
Ctrl MO N-N	Non Clone- Non Clone
Ctrl MO N-N	Non Clone- Non Clone	h2b2	9.618	600.292	124.744	2491.198	15.551
Ctrl MO N-N	Non Clone- Non Clone	h2b2	9.618	590.44	142.139	1757.762	15.551
Ctrl MO N-N	Non Clone- Non Clone	h2b2	9.618	565.928	135.681	1364.877	15.551
Ctrl MO N-N	Non Clone- Non Clone	h2b2	9.618	528.468	135.419	1307.089	15.551
Ctrl MO N-N	Non Clone- Non Clone	h2b2	9.618	483.253	142.369	1605.166	15.551
Ctrl MO N-N	Non Clone- Non Clone	h2b2	9.618	441.225	128.58	1572.199	15.551
Ctrl MO N-N	Non Clone- Non Clone
Ctrl MO N-N	Non Clone- Non Clone	h2b3	8.645	492.55	154.482	1259.48	13.965
Ctrl MO N-N	Non Clone- Non Clone	h2b3	8.645	483.475	157.016	1090.224	13.965
Ctrl MO N-N	Non Clone- Non Clone	h2b3	8.645	455.745	131.844	1167.979	13.965
Ctrl MO N-N	Non Clone- Non Clone	h2b3	8.645	409.191	124.025	1187.133	13.965
Ctrl MO N-N	Non Clone- Non Clone	h2b3	8.645	363.028	133.86	928.315	13.965
Ctrl MO N-N	Non Clone- Non Clone	h2b3	8.645	311.353	123.579	723.932	13.965
Ctrl MO N-N	Non Clone- Non Clone	h2b3	8.645	253.4	126.033	767.356	13.965
Ctrl MO N-N	Non Clone- Non Clone
Ctrl MO N-N	Non Clone- Non Clone	h2b4	7.295	541.375	193.86	2413.752	11.773
Ctrl MO N-N	Non Clone- Non Clone	h2b4	7.295	504.887	170.717	1917.143	11.773
Ctrl MO N-N	Non Clone- Non Clone	h2b4	7.295	451.496	156.456	1807.103	11.773
Ctrl MO N-N	Non Clone- Non Clone	h2b4	7.295	399.887	145.577	2072.21	11.773
Ctrl MO N-N	Non Clone- Non Clone	h2b4	7.295	348.582	145.702	1896.021	11.773
Ctrl MO N-N	Non Clone- Non Clone	h2b4	7.295	309.117	139.211	1547.256	11.773
Ctrl MO N-N	Non Clone- Non Clone
Ctrl MO N-N	Non Clone- Non Clone	h2b5	8.213	568.47	124.874	2971.479	13.267
Ctrl MO N-N	Non Clone- Non Clone	h2b5	8.213	566.906	153.963	1877.862	13.267
Ctrl MO N-N	Non Clone- Non Clone	h2b5	8.213	549.592	138.756	1284.582	13.267
Ctrl MO N-N	Non Clone- Non Clone	h2b5	8.213	514.491	148.176	1200.36	13.267
Ctrl MO N-N	Non Clone- Non Clone	h2b5	8.213	471.221	144.808	1475.686	13.267
Ctrl MO N-N	Non Clone- Non Clone	h2b5	8.213	429.144	128.831	1662.334	13.267
Ctrl MO N-N	Non Clone- Non Clone
Ctrl MO N-N	Non Clone- Non Clone	h2b6	7.187	554.782	147.462	2060.92	11.597
Ctrl MO N-N	Non Clone- Non Clone	h2b6	7.187	537.882	174.652	1736.889	11.597
Ctrl MO N-N	Non Clone- Non Clone	h2b6	7.187	483.867	161.008	1223.282	11.597
Ctrl MO N-N	Non Clone- Non Clone	h2b6	7.187	409.351	132.83	1026.84	11.597
Ctrl MO N-N	Non Clone- Non Clone	h2b6	7.187	355.268	134.626	825.333	11.597
Ctrl MO N-N	Non Clone- Non Clone	h2b6	7.187	301.131	140.898	577.341	11.597
Ctrl MO N-N	Non Clone- Non Clone	h2b6	7.187	250.703	133.979	530.643	11.597
Ctrl MO N-N	Non Clone- Non Clone	h2b6	7.187	230.729	120.018	553.478	11.597
Ctrl MO N-N	Non Clone- Non Clone
Ctrl MO N-N	Non Clone- Non Clone	h2b7	9.294	399.183	139.212	1929.058	15.024
Ctrl MO N-N	Non Clone- Non Clone	h2b7	9.294	398.021	129.793	2111.021	15.024
Ctrl MO N-N	Non Clone- Non Clone	h2b7	9.294	418.742	151.768	3742.65	15.024
Ctrl MO N-N	Non Clone- Non Clone	h2b7	9.294	417.718	142.832	3871.651	15.024
Ctrl MO N-N	Non Clone- Non Clone	h2b7	9.294	412.218	128.538	3697.984	15.024
Ctrl MO N-N	Non Clone- Non Clone	h2b7	9.294	387.414	152.039	2652.259	15.024
Ctrl MO N-N	Non Clone- Non Clone	h2b7	9.294	358.902	143.738	2623.869	15.024
Ctrl MO N-N	Non Clone- Non Clone	h2b7	9.294	323.537	127.748	2773.913	15.024
Ctrl MO N-N	Non Clone- Non Clone	h3b1	8.537	709.098	148.056	2817.137	13.794
Ctrl MO N-N	Non Clone- Non Clone	h3b1	8.537	546.281	181.881	2453.638	13.794
Ctrl MO N-N	Non Clone- Non Clone	h3b1	8.537	401.255	178.674	1341.696	13.794
Ctrl MO N-N	Non Clone- Non Clone	h3b1	8.537	313.069	151.763	1059.554	13.794
Ctrl MO N-N	Non Clone- Non Clone	h3b1	8.537	266.561	137.444	722.937	13.794
Ctrl MO N-N	Non Clone- Non Clone
Ctrl MO N-N	Non Clone- Non Clone	h3b2	7.403	572.886	161.918	2411.8	11.949
Ctrl MO N-N	Non Clone- Non Clone	h3b2	7.403	537.177	156.293	2757.524	11.949
Ctrl MO N-N	Non Clone- Non Clone	h3b2	7.403	438.712	131.567	1284.337	11.949
Ctrl MO N-N	Non Clone- Non Clone	h3b2	7.403	322.18	130.177	1013.544	11.949
Ctrl MO N-N	Non Clone- Non Clone	h3b2	7.403	252.114	118.525	783.052	11.949
Ctrl MO N-N	Non Clone- Non Clone	h3b2	7.403	189.312	103.864	445.994	11.949
Ctrl MO N-N	Non Clone- Non Clone
Ctrl MO N-N	Non Clone- Non Clone	h3b3	4.917	735.623	236.369	2608.953	7.907
Ctrl MO N-N	Non Clone- Non Clone	h3b3	4.917	609.742	225.037	1503.445	7.907
Ctrl MO N-N	Non Clone- Non Clone	h3b3	4.917	472.18	194.79	1153.002	7.907
Ctrl MO N-N	Non Clone- Non Clone	h3b3	4.917	343.694	187.18	747.71	7.907
Ctrl MO N-N	Non Clone- Non Clone	h3b3	4.917	284.16	154.46	565.117	7.907
Ctrl MO N-N	Non Clone- Non Clone
Ctrl MO N-N	Non Clone- Non Clone	h3b4	7.619	639.756	148.584	3488.978	12.3
Ctrl MO N-N	Non Clone- Non Clone	h3b4	7.619	628.5	226.07	3235.986	12.3
Ctrl MO N-N	Non Clone- Non Clone	h3b4	7.619	571.531	200.245	1521.257	12.3
Ctrl MO N-N	Non Clone- Non Clone	h3b4	7.619	439.957	158.375	1006.871	12.3
Ctrl MO N-N	Non Clone- Non Clone	h3b4	7.619	375.151	150.842	675.674	12.3
Ctrl MO N-N	Non Clone- Non Clone
Ctrl MO N-N	Non Clone- Non Clone	h3b5	10.05	442.536	130.54	1296.752	16.254
Ctrl MO N-N	Non Clone- Non Clone	h3b5	10.05	464.172	141.092	1381.837	16.254
Ctrl MO N-N	Non Clone- Non Clone	h3b5	10.05	449.738	139.17	1842.636	16.254
Ctrl MO N-N	Non Clone- Non Clone	h3b5	10.05	409.411	124.645	2046.082	16.254
Ctrl MO N-N	Non Clone- Non Clone	h3b5	10.05	336.393	132.6	1359.54	16.254
Ctrl MO N-N	Non Clone- Non Clone	h3b5	10.05	296.133	127.792	1012.044	16.254
Ctrl MO N-N	Non Clone- Non Clone	h3b5	10.05	253.77	124.56	623.876	16.254
Ctrl MO N-N	Non Clone- Non Clone
Ctrl MO N-N	Non Clone- Non Clone	h3b6	9.996	610.929	134.598	2862.732	16.166
Ctrl MO N-N	Non Clone- Non Clone	h3b6	9.996	503.848	153.786	1359.872	16.166
Ctrl MO N-N	Non Clone- Non Clone	h3b6	9.996	400.396	149.847	1920.287	16.166
Ctrl MO N-N	Non Clone- Non Clone	h3b6	9.996	328.348	143.86	2356.92	16.166
Ctrl MO N-N	Non Clone- Non Clone	h3b6	9.996	276.066	114.446	2107.289	16.166
Ctrl MO N-N	Non Clone- Non Clone	h3b6	9.996	213.067	109.204	766.918	16.166
Ctrl MO N-N	Non Clone- Non Clone
Ctrl MO N-N	Non Clone- Non Clone	h3b7	8.321	648.121	181	4095	13.442
Ctrl MO N-N	Non Clone- Non Clone	h3b7	8.321	631.453	223.738	2662.941	13.442
Ctrl MO N-N	Non Clone- Non Clone	h3b7	8.321	529.355	167.487	1558.511	13.442
Ctrl MO N-N	Non Clone- Non Clone	h3b7	8.321	408.234	159.54	1074.828	13.442
Ctrl MO N-N	Non Clone- Non Clone	h3b7	8.321	248.155	130.825	491.902	13.442
Ctrl MO N-N	Non Clone- Non Clone	h3b7	8.321	173.396	112.186	317.875	13.442
Ctrl MO N-N	Non Clone- Non Clone	h3b7	8.321	145.784	102.489	262.122	13.442
Ctrl MO N-N	Non Clone- Non Clone
Ctrl MO N-N	Non Clone- Non Clone	h3b8	6.538	483.242	147.709	1519.698	10.543
Ctrl MO N-N	Non Clone- Non Clone	h3b8	6.538	436.016	176.62	1370.877	10.543
Ctrl MO N-N	Non Clone- Non Clone	h3b8	6.538	335.762	147.076	677.992	10.543
Ctrl MO N-N	Non Clone- Non Clone	h3b8	6.538	213.493	116.172	368.325	10.543
Ctrl MO N-N	Non Clone- Non Clone	h3b8	6.538	170.27	107.46	273.944	10.543
Ctrl MO N-N	Non Clone- Non Clone	h3b8	6.538	142.767	103.305	213.413	10.543
Ctrl MO N-N	Non Clone- Non Clone	h4b1	6.484	858.41	229.962	4077.638	10.455
Ctrl MO N-N	Non Clone- Non Clone	h4b1	6.484	822.39	172.036	3905.357	10.455
Ctrl MO N-N	Non Clone- Non Clone	h4b1	6.484	793.119	237.766	3313.852	10.455
Ctrl MO N-N	Non Clone- Non Clone	h4b1	6.484	745.693	197.19	2898.331	10.455
Ctrl MO N-N	Non Clone- Non Clone	h4b1	6.484	643.063	210.937	2869.159	10.455
Ctrl MO N-N	Non Clone- Non Clone	h4b1	6.484	528.09	213.096	2696.335	10.455
Ctrl MO N-N	Non Clone- Non Clone	h4b1	6.484	436.863	172.107	1818.118	10.455
Ctrl MO N-N	Non Clone- Non Clone	h4b1	6.484	351.351	149.539	1155.219	10.455
Ctrl MO N-N	Non Clone- Non Clone	h4b1	6.484	274.037	135.366	702.737	10.455
Ctrl MO N-N	Non Clone- Non Clone
Ctrl MO N-N	Non Clone- Non Clone	h4b2	7.835	827.052	261.996	2704.789	12.652
Ctrl MO N-N	Non Clone- Non Clone	h4b2	7.835	806.795	303.344	2552.702	12.652
Ctrl MO N-N	Non Clone- Non Clone	h4b2	7.835	766.097	236.706	2224.625	12.652
Ctrl MO N-N	Non Clone- Non Clone	h4b2	7.835	724.011	277.862	1884.962	12.652
Ctrl MO N-N	Non Clone- Non Clone	h4b2	7.835	647.081	262.106	2138.542	12.652
Ctrl MO N-N	Non Clone- Non Clone	h4b2	7.835	566.006	192.153	2866.121	12.652
Ctrl MO N-N	Non Clone- Non Clone	h4b2	7.835	492.029	197.894	3099.917	12.652
Ctrl MO N-N	Non Clone- Non Clone	h4b2	7.835	419.608	155.304	3064.943	12.652
Ctrl MO N-N	Non Clone- Non Clone
Ctrl MO N-N	Non Clone- Non Clone	h4b3	6.97	908.362	189.4	4093.949	11.246
Ctrl MO N-N	Non Clone- Non Clone	h4b3	6.97	886.239	143.636	3963.216	11.246
Ctrl MO N-N	Non Clone- Non Clone	h4b3	6.97	848.253	148.173	3493.346	11.246
Ctrl MO N-N	Non Clone- Non Clone	h4b3	6.97	783.154	180.119	3431.86	11.246
Ctrl MO N-N	Non Clone- Non Clone	h4b3	6.97	671.086	154.26	3498.452	11.246
Ctrl MO N-N	Non Clone- Non Clone	h4b3	6.97	534.92	159.865	2508.005	11.246
Ctrl MO N-N	Non Clone- Non Clone	h4b3	6.97	430.085	180.863	1453.816	11.246
Ctrl MO N-N	Non Clone- Non Clone	h4b3	6.97	341.2	144.66	983.959	11.246
Ctrl MO N-N	Non Clone- Non Clone	h4b3	6.97	272.902	131.143	674.027	11.246
Ctrl MO N-N	Non Clone- Non Clone
Ctrl MO N-N	Non Clone- Non Clone	h4b4	10.375	715.4	188.276	3050.958	16.781
Ctrl MO N-N	Non Clone- Non Clone	h4b4	10.375	815.471	234.605	3898.601	16.781
Ctrl MO N-N	Non Clone- Non Clone	h4b4	10.375	777.155	231.408	3090.563	16.781
Ctrl MO N-N	Non Clone- Non Clone	h4b4	10.375	660.512	166.136	2144.218	16.781
Ctrl MO N-N	Non Clone- Non Clone	h4b4	10.375	581.921	187.647	1791.761	16.781
Ctrl MO N-N	Non Clone- Non Clone	h4b4	10.375	545.621	182.693	1792.69	16.781
Ctrl MO N-N	Non Clone- Non Clone	h4b4	10.375	497.024	176.078	1704.796	16.781
Ctrl MO N-N	Non Clone- Non Clone	h4b4	10.375	428.735	151.501	1471.631	16.781
Ctrl MO N-N	Non Clone- Non Clone	h4b4	10.375	351.738	134.735	1504.383	16.781
Ctrl MO N-N	Non Clone- Non Clone	h4b4	10.375	299.133	133.486	1365.744	16.781
Ctrl MO N-N	Non Clone- Non Clone
Ctrl MO N-N	Non Clone- Non Clone	h4b5	7.673	824.001	221.567	3806.613	12.388
Ctrl MO N-N	Non Clone- Non Clone	h4b5	7.673	856.52	265.871	2540.907	12.388
Ctrl MO N-N	Non Clone- Non Clone	h4b5	7.673	827.175	248.305	2994.767	12.388
Ctrl MO N-N	Non Clone- Non Clone	h4b5	7.673	811.089	235.096	3028.604	12.388
Ctrl MO N-N	Non Clone- Non Clone	h4b5	7.673	770.835	212.93	2268.476	12.388
Ctrl MO N-N	Non Clone- Non Clone	h4b5	7.673	684.356	206.824	1781.226	12.388
Ctrl MO N-N	Non Clone- Non Clone	h4b5	7.673	562.376	196.126	1137.878	12.388
Ctrl MO N-N	Non Clone- Non Clone	h4b5	7.673	462.127	192.01	994.375	12.388
Ctrl MO N-N	Non Clone- Non Clone	h4b5	7.673	359.234	158.762	793.559	12.388
Ctrl MO N-N	Non Clone- Non Clone
Ctrl MO N-N	Non Clone- Non Clone	h4b6	11.833	851.201	154.253	3070.387	19.153
Ctrl MO N-N	Non Clone- Non Clone	h4b6	11.833	802.151	161.069	2767.164	19.153
Ctrl MO N-N	Non Clone- Non Clone	h4b6	11.833	764.063	209.284	2666.444	19.153
Ctrl MO N-N	Non Clone- Non Clone	h4b6	11.833	718.323	216.051	2659.814	19.153
Ctrl MO N-N	Non Clone- Non Clone	h4b6	11.833	640.917	228.219	2154.906	19.153
Ctrl MO N-N	Non Clone- Non Clone	h4b6	11.833	555.336	190.645	2204.046	19.153
Ctrl MO N-N	Non Clone- Non Clone	h4b6	11.833	497.077	150.319	2066.757	19.153
Ctrl MO N-N	Non Clone- Non Clone	h4b6	11.833	439.277	134.894	1409.591	19.153
Ctrl MO N-N	Non Clone- Non Clone	h4b6	11.833	380.91	139.902	1664.822	19.153
Ctrl MO N-N	Non Clone- Non Clone	h4b6	11.833	332.972	128.461	1370.31	19.153
Ctrl MO N-N	Non Clone- Non Clone
Ctrl MO N-N	Non Clone- Non Clone	h4b7	5.025	737.837	285.11	2233.938	8.083
Ctrl MO N-N	Non Clone- Non Clone	h4b7	5.025	714.939	260.376	2476.567	8.083
Ctrl MO N-N	Non Clone- Non Clone	h4b7	5.025	689.277	269.178	2343.16	8.083
Ctrl MO N-N	Non Clone- Non Clone	h4b7	5.025	655.264	248.258	2169.382	8.083
Ctrl MO N-N	Non Clone- Non Clone	h4b7	5.025	602.8	227.754	1608.732	8.083
Ctrl MO N-N	Non Clone- Non Clone	h4b7	5.025	528.505	168.195	1503.39	8.083
Ctrl MO N-N	Non Clone- Non Clone	h4b7	5.025	488.326	179.89	1348.603	8.083
Ctrl MO N-N	Non Clone- Non Clone	h4b7	5.025	408.085	164.57	1272.02	8.083
Ctrl MO N-N	Non Clone- Non Clone	h4b7	5.025	344.596	149.735	892.562	8.083
Ctrl MO N-N	Non Clone- Non Clone	h5b1	6.97	635.913	165.694	2174.158	11.246
Ctrl MO N-N	Non Clone- Non Clone	h5b1	6.97	493.459	165.173	1394.408	11.246
Ctrl MO N-N	Non Clone- Non Clone	h5b1	6.97	310.868	160.345	668.197	11.246
Ctrl MO N-N	Non Clone- Non Clone	h5b1	6.97	217.098	129.632	512.529	11.246
Ctrl MO N-N	Non Clone- Non Clone
Ctrl MO N-N	Non Clone- Non Clone	h5b2	8.591	578.312	162.324	1706.691	13.88
Ctrl MO N-N	Non Clone- Non Clone	h5b2	8.591	554.009	149.774	1416.342	13.88
Ctrl MO N-N	Non Clone- Non Clone	h5b2	8.591	469.748	163.256	1552.668	13.88
Ctrl MO N-N	Non Clone- Non Clone	h5b2	8.591	336.323	119.726	1239.494	13.88
Ctrl MO N-N	Non Clone- Non Clone
Ctrl MO N-N	Non Clone- Non Clone	h5b3	7.241	525.857	166.314	1247.553	11.685
Ctrl MO N-N	Non Clone- Non Clone	h5b3	7.241	399.094	140.554	1067.264	11.685
Ctrl MO N-N	Non Clone- Non Clone	h5b3	7.241	263.847	122.482	664.321	11.685
Ctrl MO N-N	Non Clone- Non Clone	h5b3	7.241	193.234	102.37	718.537	11.685
Ctrl MO N-N	Non Clone- Non Clone
Ctrl MO N-N	Non Clone- Non Clone	h5b4	8.645	525.551	170.742	1782.095	13.97
Ctrl MO N-N	Non Clone- Non Clone	h5b4	8.645	438.029	150.534	1685.383	13.97
Ctrl MO N-N	Non Clone- Non Clone	h5b4	8.645	340.666	110.305	1874.648	13.97
Ctrl MO N-N	Non Clone- Non Clone	h5b4	8.645	262.629	103.265	1774.985	13.97
Ctrl MO N-N	Non Clone- Non Clone	h5b4	8.645	205.394	103.946	902.305	13.97
Ctrl MO N-N	Non Clone- Non Clone
Ctrl MO N-N	Non Clone- Non Clone	h5b5	7.349	478.98	168.225	1428.688	11.861
Ctrl MO N-N	Non Clone- Non Clone	h5b5	7.349	502.803	131.033	2191.051	11.861
Ctrl MO N-N	Non Clone- Non Clone	h5b5	7.349	464.516	134.116	1288.933	11.861
Ctrl MO N-N	Non Clone- Non Clone	h5b5	7.349	307	141.568	661.827	11.861
Ctrl MO N-N	Non Clone- Non Clone	h5b5	7.349	214.344	114.607	437.945	11.861
Ctrl MO N-N	Non Clone- Non Clone
Ctrl MO N-N	Non Clone- Non Clone	h5b6	8.105	638.752	166.296	2418.944	13.091
Ctrl MO N-N	Non Clone- Non Clone	h5b6	8.105	578.012	203.104	1512.587	13.091
Ctrl MO N-N	Non Clone- Non Clone	h5b6	8.105	465.239	158.495	2113.334	13.091
Ctrl MO N-N	Non Clone- Non Clone	h5b6	8.105	340.942	152.255	1108.356	13.091
Ctrl MO N-N	Non Clone- Non Clone	h5b6	8.105	244.486	125.191	647.98	13.091
Ctrl MO N-N	Non Clone- Non Clone	h5b6	8.105	210.611	101.112	1303.882	13.091
Ctrl MO N-N	Non Clone- Non Clone
Ctrl MO N-N	Non Clone- Non Clone	h5b7	7.889	617.112	179.296	2424.287	12.74
Ctrl MO N-N	Non Clone- Non Clone	h5b7	7.889	484.815	171.074	1261.658	12.74
Ctrl MO N-N	Non Clone- Non Clone	h5b7	7.889	319.233	144.558	660.154	12.74
Ctrl MO N-N	Non Clone- Non Clone	h5b7	7.889	240.691	143.881	574.642	12.74
Ctrl MO N-N	Non Clone- Non Clone	h5b7	7.889	191.816	109.937	524.119	12.74
Ctrl MO N-N	Non Clone- Non Clone	h5b7	7.889	175.142	113.383	587.751	12.74
Ctrl MO N-N	Non Clone- Non Clone
Ctrl MO N-N	Non Clone- Non Clone	h5b8	11.131	567.845	148.008	1898.309	18.011
Ctrl MO N-N	Non Clone- Non Clone	h5b8	11.131	562.73	144.051	2238.776	18.011
Ctrl MO N-N	Non Clone- Non Clone	h5b8	11.131	412.113	173.589	1753.051	18.011
Ctrl MO N-N	Non Clone- Non Clone	h5b8	11.131	256.66	128.422	585.17	18.011
Ctrl MO N-N	Non Clone- Non Clone	h5b8	11.131	181.131	114.768	311.523	18.011
Ctrl MO N-N	Non Clone- Non Clone	h6b1	7.457	719.492	265.537	1447.637	12.037
Ctrl MO N-N	Non Clone- Non Clone	h6b1	7.457	634.892	229.13	1592.537	12.037
Ctrl MO N-N	Non Clone- Non Clone	h6b1	7.457	463.468	195.008	1225.507	12.037
Ctrl MO N-N	Non Clone- Non Clone	h6b1	7.457	324.562	137.294	766.599	12.037
Ctrl MO N-N	Non Clone- Non Clone	h6b1	7.457	268.547	127.133	708.846	12.037
Ctrl MO N-N	Non Clone- Non Clone	h6b1	7.457	235.194	132.509	545.603	12.037
Ctrl MO N-N	Non Clone- Non Clone
Ctrl MO N-N	Non Clone- Non Clone	h6b2	5.295	977.498	285.272	3283.075	8.522
Ctrl MO N-N	Non Clone- Non Clone	h6b2	5.295	1239.251	312.97	3085.988	8.522
Ctrl MO N-N	Non Clone- Non Clone	h6b2	5.295	1344.882	337.601	2819.873	8.522
Ctrl MO N-N	Non Clone- Non Clone	h6b2	5.295	1323.291	308.544	3395.226	8.522
Ctrl MO N-N	Non Clone- Non Clone	h6b2	5.295	1234.574	195.411	3479.285	8.522
Ctrl MO N-N	Non Clone- Non Clone	h6b2	5.295	1037.975	209.91	2798.498	8.522
Ctrl MO N-N	Non Clone- Non Clone	h6b2	5.295	743.482	185.846	2023.852	8.522
Ctrl MO N-N	Non Clone- Non Clone	h6b2	5.295	470.535	171.629	1075.967	8.522
Ctrl MO N-N	Non Clone- Non Clone
Ctrl MO N-N	Non Clone- Non Clone	h6b3	9.24	771.33	183.405	2285.903	14.936
Ctrl MO N-N	Non Clone- Non Clone	h6b3	9.24	782.174	195	2140.552	14.936
Ctrl MO N-N	Non Clone- Non Clone	h6b3	9.24	576.794	192.098	1775.923	14.936
Ctrl MO N-N	Non Clone- Non Clone	h6b3	9.24	375.102	134.093	1398.572	14.936
Ctrl MO N-N	Non Clone- Non Clone	h6b3	9.24	267.178	115.131	813.193	14.936
Ctrl MO N-N	Non Clone- Non Clone	h6b3	9.24	215.989	113.423	525.65	14.936
Ctrl MO N-N	Non Clone- Non Clone
Ctrl MO N-N	Non Clone- Non Clone	h6b4	7.727	958.075	196.608	2249.973	12.476
Ctrl MO N-N	Non Clone- Non Clone	h6b4	7.727	1067.927	245.985	2076.161	12.476
Ctrl MO N-N	Non Clone- Non Clone	h6b4	7.727	980.57	230.213	2017.99	12.476
Ctrl MO N-N	Non Clone- Non Clone	h6b4	7.727	718.025	193.808	1725.41	12.476
Ctrl MO N-N	Non Clone- Non Clone	h6b4	7.727	505.113	186.744	1579.129	12.476
Ctrl MO N-N	Non Clone- Non Clone	h6b4	7.727	371.545	126.756	1004.791	12.476
Ctrl MO N-N	Non Clone- Non Clone	h6b4	7.727	255.414	119.01	705.797	12.476
Ctrl MO N-N	Non Clone- Non Clone
Ctrl MO N-N	Non Clone- Non Clone	h6b5	8.754	1145.715	224.686	2730.474	14.145
Ctrl MO N-N	Non Clone- Non Clone	h6b5	8.754	944.899	247.681	2312.547	14.145
Ctrl MO N-N	Non Clone- Non Clone	h6b5	8.754	722.097	237.385	2172.69	14.145
Ctrl MO N-N	Non Clone- Non Clone	h6b5	8.754	513.418	153.114	1847.225	14.145
Ctrl MO N-N	Non Clone- Non Clone	h6b5	8.754	347.748	143.624	1037.61	14.145
Ctrl MO N-N	Non Clone- Non Clone	h6b5	8.754	265.042	135.832	873.581	14.145
Ctrl MO N-N	Non Clone- Non Clone
Ctrl MO N-N	Non Clone- Non Clone	h6b6	8.375	861.626	249.029	2614.562	13.522
Ctrl MO N-N	Non Clone- Non Clone	h6b6	8.375	869.128	232.323	2368.561	13.522
Ctrl MO N-N	Non Clone- Non Clone	h6b6	8.375	789.263	216.306	2390.731	13.522
Ctrl MO N-N	Non Clone- Non Clone	h6b6	8.375	628.184	138.116	2689.043	13.522
Ctrl MO N-N	Non Clone- Non Clone	h6b6	8.375	433.432	144.807	997.228	13.522
Ctrl MO N-N	Non Clone- Non Clone	h6b6	8.375	293.442	143.662	601.85	13.522
Ctrl MO N-N	Non Clone- Non Clone	h6b6	8.375	236.346	132.901	641.354	13.522
Ctrl MO N-N	Non Clone- Non Clone
Ctrl MO N-N	Non Clone- Non Clone	h6b7	4.755	749.386	228.396	2133.925	7.644
Ctrl MO N-N	Non Clone- Non Clone	h6b7	4.755	811.229	191.225	1904.259	7.644
Ctrl MO N-N	Non Clone- Non Clone	h6b7	4.755	699.943	207.041	1789.473	7.644
Ctrl MO N-N	Non Clone- Non Clone	h6b7	6.484	757.801	178.913	2582.074	10.455
Ctrl MO N-N	Non Clone- Non Clone	h6b7	6.484	551.448	185.014	1406.295	10.455
Ctrl MO N-N	Non Clone- Non Clone	h6b7	6.484	348.446	133.254	865.404	10.455
Ctrl MO N-N	Non Clone- Non Clone	h6b7	6.484	252.985	119.184	779.071	10.455
Ctrl MO N-N	Non Clone- Non Clone	h7b1	10.483	620.93	153.04	2594.492	16.954
Ctrl MO N-N	Non Clone- Non Clone	h7b1	10.483	559.483	172.394	1919.463	16.954
Ctrl MO N-N	Non Clone- Non Clone	h7b1	10.483	418.535	165.923	1337.881	16.954
Ctrl MO N-N	Non Clone- Non Clone	h7b1	10.483	322.538	144.12	825.557	16.954
Ctrl MO N-N	Non Clone- Non Clone	h7b1	10.483	252.992	122.275	879.846	16.954
Ctrl MO N-N	Non Clone- Non Clone	h7b1	10.483	224.917	129.878	813.257	16.954
Ctrl MO N-N	Non Clone- Non Clone	h7b1	10.483	203.519	115.037	687.072	16.954
Ctrl MO N-N	Non Clone- Non Clone
Ctrl MO N-N	Non Clone- Non Clone	h7b2	8.645	600.569	190.71	2168.086	13.97
Ctrl MO N-N	Non Clone- Non Clone	h7b2	8.645	474.83	199.36	1284.971	13.97
Ctrl MO N-N	Non Clone- Non Clone	h7b2	8.645	371.846	153.869	931.128	13.97
Ctrl MO N-N	Non Clone- Non Clone	h7b2	8.645	289.74	140.866	1049.132	13.97
Ctrl MO N-N	Non Clone- Non Clone	h7b2	8.645	245.094	128.534	923.449	13.97
Ctrl MO N-N	Non Clone- Non Clone
Ctrl MO N-N	Non Clone- Non Clone	h7b3	8.862	670.725	143.182	2577.42	14.321
Ctrl MO N-N	Non Clone- Non Clone	h7b3	8.862	667.414	155.856	2387.283	14.321
Ctrl MO N-N	Non Clone- Non Clone	h7b3	8.862	574.526	201.109	2128.697	14.321
Ctrl MO N-N	Non Clone- Non Clone	h7b3	8.862	441.086	202.665	1029.144	14.321
Ctrl MO N-N	Non Clone- Non Clone	h7b3	8.862	361.326	182.047	982.428	14.321
Ctrl MO N-N	Non Clone- Non Clone	h7b3	8.862	318.97	146.975	1571.148	14.321
Ctrl MO N-N	Non Clone- Non Clone	h7b3	8.862	283.227	142.288	1534.73	14.321
Ctrl MO N-N	Non Clone- Non Clone
Ctrl MO N-N	Non Clone- Non Clone	h7b4	10.212	643.952	121.845	3414.97	16.517
Ctrl MO N-N	Non Clone- Non Clone	h7b4	10.212	472.232	136.766	1578.17	16.517
Ctrl MO N-N	Non Clone- Non Clone	h7b4	10.212	338.125	134.458	1058.554	16.517
Ctrl MO N-N	Non Clone- Non Clone	h7b4	10.212	243.6	115.09	741.266	16.517
Ctrl MO N-N	Non Clone- Non Clone	h7b4	10.212	209.37	119.924	560.977	16.517
Ctrl MO N-N	Non Clone- Non Clone
Ctrl MO N-N	Non Clone- Non Clone	h7b5	5.836	668.732	202.946	1697.166	9.401
Ctrl MO N-N	Non Clone- Non Clone	h7b5	5.836	484.873	220.916	991.857	9.401
Ctrl MO N-N	Non Clone- Non Clone	h7b5	5.836	369.258	177.121	805.46	9.401
Ctrl MO N-N	Non Clone- Non Clone	h7b5	5.836	291.488	137.561	722.927	9.401
Ctrl MO N-N	Non Clone- Non Clone	h7b5	5.836	254.529	141.183	589.793	9.401
Ctrl MO N-N	Non Clone- Non Clone
Ctrl MO N-N	Non Clone- Non Clone	h7b6	13.13	802.653	163.993	2976.127	21.262
Ctrl MO N-N	Non Clone- Non Clone	h7b6	13.13	767.382	157.879	3543.184	21.262
Ctrl MO N-N	Non Clone- Non Clone	h7b6	13.13	631.591	170.516	2682.18	21.262
Ctrl MO N-N	Non Clone- Non Clone	h7b6	13.13	425.307	152.288	1409.628	21.262
Ctrl MO N-N	Non Clone- Non Clone	h7b6	13.13	290.327	137.813	822.264	21.262
Ctrl MO N-N	Non Clone- Non Clone	h7b6	13.13	204.369	118.39	417.441	21.262
Ctrl MO N-N	Non Clone- Non Clone	h7b6	13.13	174.006	106.685	444.596	21.262
Ctrl MO N-N	Non Clone- Non Clone
Ctrl MO N-N	Non Clone- Non Clone	h7b7	7.024	594.587	155.706	1704.052	11.334
Ctrl MO N-N	Non Clone- Non Clone	h7b7	7.024	482.887	157.719	1953.504	11.334
Ctrl MO N-N	Non Clone- Non Clone	h7b7	7.024	349.785	158.754	997.536	11.334
Ctrl MO N-N	Non Clone- Non Clone	h7b7	7.024	264.527	146.21	572.994	11.334
Ctrl MO N-N	Non Clone- Non Clone	h7b7	7.024	198.799	119.59	369.406	11.334
Ctrl MO N-N	Non Clone- Non Clone	h7b7	7.024	169.706	101.439	258.448	11.334
Ctrl MO N-N	Non Clone- Non Clone
Ctrl MO N-N	Non Clone- Non Clone	h7b8	9.996	614.33	163.342	2345.324	16.166
Ctrl MO N-N	Non Clone- Non Clone	h7b8	9.996	497.975	150.387	1882.443	16.166
Ctrl MO N-N	Non Clone- Non Clone	h7b8	9.996	322.963	136.011	858.476	16.166
Ctrl MO N-N	Non Clone- Non Clone	h7b8	9.996	239.463	123.431	490.037	16.166
Ctrl MO N-N	Non Clone- Non Clone	h7b8	9.996	185.634	101.972	334.573	16.166
Ctrl MO N-N	Non Clone- Non Clone	h7b8	9.996	151.712	104.055	243.997	16.166
Ctrl MO N-N	Non Clone- Non Clone	h8b1	7.619	711.691	166.512	2563.179	12.3
Ctrl MO N-N	Non Clone- Non Clone	h8b1	7.619	615.114	162.928	2316.712	12.3
Ctrl MO N-N	Non Clone- Non Clone	h8b1	7.619	473.606	151.445	2518.892	12.3
Ctrl MO N-N	Non Clone- Non Clone	h8b1	7.619	400.055	151.613	2389.67	12.3
Ctrl MO N-N	Non Clone- Non Clone	h8b1	7.619	301.966	129.21	1350.876	12.3
Ctrl MO N-N	Non Clone- Non Clone	h8b1	7.619	221.402	117.401	646.877	12.3
Ctrl MO N-N	Non Clone- Non Clone
Ctrl MO N-N	Non Clone- Non Clone	h8b2	10.158	606.866	143.457	2250.107	16.426
Ctrl MO N-N	Non Clone- Non Clone	h8b2	10.158	636.783	146.318	1728.964	16.426
Ctrl MO N-N	Non Clone- Non Clone	h8b2	10.158	617.242	151.325	2522.211	16.426
Ctrl MO N-N	Non Clone- Non Clone	h8b2	10.158	558.584	139.945	2600.156	16.426
Ctrl MO N-N	Non Clone- Non Clone	h8b2	9.834	569.529	185.793	1295.761	15.899
Ctrl MO N-N	Non Clone- Non Clone	h8b2	9.834	359.91	168.398	665.095	15.899
Ctrl MO N-N	Non Clone- Non Clone	h8b2	9.834	233.224	123.92	390.11	15.899
Ctrl MO N-N	Non Clone- Non Clone	h8b2	9.834	170.019	114.901	276.708	15.899
Ctrl MO N-N	Non Clone- Non Clone
Ctrl MO N-N	Non Clone- Non Clone	h8b3	10.591	794.292	206.939	2312.62	17.132
Ctrl MO N-N	Non Clone- Non Clone	h8b3	10.591	703.524	179.603	1859.31	17.132
Ctrl MO N-N	Non Clone- Non Clone	h8b3	10.591	566.158	176.163	1675.847	17.132
Ctrl MO N-N	Non Clone- Non Clone	h8b3	10.591	397.884	184.09	1036.891	17.132
Ctrl MO N-N	Non Clone- Non Clone	h8b3	10.591	344.265	162.779	2104.922	17.132
Ctrl MO N-N	Non Clone- Non Clone
Ctrl MO N-N	Non Clone- Non Clone	h8b4	7.457	625.374	183.706	1584.459	12.037
Ctrl MO N-N	Non Clone- Non Clone	h8b4	7.457	582.513	163.851	1761.238	12.037
Ctrl MO N-N	Non Clone- Non Clone	h8b4	7.457	508.522	167.193	2961.135	12.037
Ctrl MO N-N	Non Clone- Non Clone	h8b4	7.457	457.012	153.228	3953.74	12.037
Ctrl MO N-N	Non Clone- Non Clone	h8b4	7.457	383.778	152.341	3899.649	12.037
Ctrl MO N-N	Non Clone- Non Clone	h8b4	7.457	286.184	139.038	1384.422	12.037
Ctrl MO N-N	Non Clone- Non Clone
Ctrl MO N-N	Non Clone- Non Clone	h8b5	9.726	645.216	184.849	2931.493	15.645
Ctrl MO N-N	Non Clone- Non Clone	h8b5	9.726	638.122	176.547	2010.667	15.645
Ctrl MO N-N	Non Clone- Non Clone	h8b5	9.726	680.578	205.964	1817.686	15.645
Ctrl MO N-N	Non Clone- Non Clone	h8b5	9.726	760.61	241.156	1632.963	15.645
Ctrl MO N-N	Non Clone- Non Clone	h8b5	9.726	763.065	235.947	2214.804	15.645
Ctrl MO N-N	Non Clone- Non Clone	h8b5	9.726	583.408	218.999	1154.549	15.645
Ctrl MO N-N	Non Clone- Non Clone	h8b5	9.726	357.708	152.63	1064.671	15.645
Ctrl MO N-N	Non Clone- Non Clone
Ctrl MO N-N	Non Clone- Non Clone	h8b6	7.457	642.251	117.501	2234.722	12.037
Ctrl MO N-N	Non Clone- Non Clone	h8b6	7.457	633.926	135.488	1575.971	12.037
Ctrl MO N-N	Non Clone- Non Clone	h8b6	7.457	587.908	144.298	1497.229	12.037
Ctrl MO N-N	Non Clone- Non Clone	h8b6	7.457	478.956	143.877	1139.479	12.037
Ctrl MO N-N	Non Clone- Non Clone	h8b6	7.457	304.087	145.629	577.776	12.037
Ctrl MO N-N	Non Clone- Non Clone	h8b6	7.457	207.875	117.857	344.046	12.037
Ctrl MO N-N	Non Clone- Non Clone	h8b6	7.457	157.119	96.666	301.863	12.037
Ecad MO C-C	Clone- Clone	h1b1	10.753	417.313	121.276	4052.878	17.396
Ecad MO C-C	Clone- Clone	h1b1	10.753	373.059	116.945	3070.497	17.396
Ecad MO C-C	Clone- Clone	h1b1	10.753	296.646	118.901	1530.952	17.396
Ecad MO C-C	Clone- Clone	h1b1	10.753	226.157	100.525	1364.678	17.396
Ecad MO C-C	Clone- Clone	h1b1	10.753	186.045	104.403	696.438	17.396
Ecad MO C-C	Clone- Clone	h1b1	10.753	163.495	102.817	426.671	17.396
Ecad MO C-C	Clone- Clone
Ecad MO C-C	Clone- Clone	h1b2	13.238	265.39	108.815	2107.626	21.438
Ecad MO C-C	Clone- Clone	h1b2	13.238	273.801	101.213	2451.592	21.438
Ecad MO C-C	Clone- Clone	h1b2	13.238	257.82	113.451	1362.637	21.438
Ecad MO C-C	Clone- Clone	h1b2	13.238	239.92	93.993	804.595	21.438
Ecad MO C-C	Clone- Clone	h1b2	13.238	211.152	107.124	578.429	21.438
Ecad MO C-C	Clone- Clone	h1b2	13.238	176.767	101.849	398.753	21.438
Ecad MO C-C	Clone- Clone	h1b2	13.238	147.665	102.134	270.912	21.438
Ecad MO C-C	Clone- Clone
Ecad MO C-C	Clone- Clone	h1b3	9.294	433.658	132.343	1862.928	15.024
Ecad MO C-C	Clone- Clone	h1b3	9.294	445.372	125.565	1617.39	15.024
Ecad MO C-C	Clone- Clone	h1b3	9.294	414.859	130.323	1658.624	15.024
Ecad MO C-C	Clone- Clone	h1b3	9.294	356.835	147.449	1604.909	15.024
Ecad MO C-C	Clone- Clone	h1b3	9.294	304.52	134.759	1007.803	15.024
Ecad MO C-C	Clone- Clone	h1b3	9.294	272.308	121.618	773.968	15.024
Ecad MO C-C	Clone- Clone	h1b3	9.294	239.427	118.9	1061.648	15.024
Ecad MO C-C	Clone- Clone
Ecad MO C-C	Clone- Clone
Ecad MO C-C	Clone- Clone	h2b1	7.943	316.496	126.64	1729.718	12.827
Ecad MO C-C	Clone- Clone	h2b1	7.943	333.253	129.768	1301.864	12.827
Ecad MO C-C	Clone- Clone	h2b1	7.943	326.824	122.756	1203.074	12.827
Ecad MO C-C	Clone- Clone	h2b1	7.943	303.919	116.558	1117.627	12.827
Ecad MO C-C	Clone- Clone	h2b1	7.943	269.07	118.971	929.094	12.827
Ecad MO C-C	Clone- Clone	h2b1	7.943	226.289	110.106	680.336	12.827
Ecad MO C-C	Clone- Clone
Ecad MO C-C	Clone- Clone	h2b2	12.968	392.24	126.331	1691.5	20.998
Ecad MO C-C	Clone- Clone	h2b2	12.968	324.347	122.633	2489.686	20.998
Ecad MO C-C	Clone- Clone	h2b2	12.968	268.775	117.639	3194.167	20.998
Ecad MO C-C	Clone- Clone	h2b2	12.968	205.866	103.77	1522.786	20.998
Ecad MO C-C	Clone- Clone	h2b2	12.968	158.962	93.717	719.502	20.998
Ecad MO C-C	Clone- Clone	h2b2	12.968	140.693	97.996	587.122	20.998
Ecad MO C-C	Clone- Clone
Ecad MO C-C	Clone- Clone	h2b3	8.051	271.834	115.605	827.463	13.003
Ecad MO C-C	Clone- Clone	h2b3	8.051	252.043	112.637	800.822	13.003
Ecad MO C-C	Clone- Clone	h2b3	8.051	231.726	100.26	940.105	13.003
Ecad MO C-C	Clone- Clone	h2b3	8.051	196.031	108.093	577.147	13.003
Ecad MO C-C	Clone- Clone	h2b3	8.051	161.567	99.297	548.371	13.003
Ecad MO C-C	Clone- Clone	h2b3	8.051	147.648	99.08	386.924	13.003
Ecad MO C-C	Clone- Clone
Ecad MO C-C	Clone- Clone	h2b4	7.565	395.361	117.795	3149.535	12.179
Ecad MO C-C	Clone- Clone	h2b4	7.565	413.09	123.119	4095	12.179
Ecad MO C-C	Clone- Clone	h2b4	7.565	384.227	115.448	4070.701	12.179
Ecad MO C-C	Clone- Clone	h2b4	7.565	296.478	114.588	1855.383	12.179
Ecad MO C-C	Clone- Clone	h2b4	7.565	212.477	104.914	846.518	12.179
Ecad MO C-C	Clone- Clone	h2b4	7.565	165.915	102.06	328.192	12.179
Ecad MO C-C	Clone- Clone
Ecad MO C-C	Clone- Clone	h2b5	7.889	275.084	106.014	1762.751	12.74
Ecad MO C-C	Clone- Clone	h2b5	7.889	271.849	105.293	1976.498	12.74
Ecad MO C-C	Clone- Clone	h2b5	7.889	249.939	101.692	2831.176	12.74
Ecad MO C-C	Clone- Clone	h2b5	7.889	224.234	104.146	1791.529	12.74
Ecad MO C-C	Clone- Clone	h2b5	7.889	185.172	102.486	823.778	12.74
Ecad MO C-C	Clone- Clone
Ecad MO C-C	Clone- Clone	h2b6	7.511	259.09	117.004	883.01	12.125
Ecad MO C-C	Clone- Clone	h2b6	7.511	234.07	106.444	1295.478	12.125
Ecad MO C-C	Clone- Clone	h2b6	7.511	207.057	101.544	1253.723	12.125
Ecad MO C-C	Clone- Clone	h2b6	7.511	176.061	98.406	800.599	12.125
Ecad MO C-C	Clone- Clone	h2b6	7.511	155.012	97.433	394.45	12.125
Ecad MO C-C	Clone- Clone	h2b6	7.511	145.312	98.736	337.186	12.125
Ecad MO C-C	Clone- Clone
Ecad MO C-C	Clone- Clone	h2b7	14.589	318.85	103.756	3082.215	23.634
Ecad MO C-C	Clone- Clone	h2b7	14.589	239.806	111.09	1243.675	23.634
Ecad MO C-C	Clone- Clone	h2b7	14.589	193.484	105.353	968.026	23.634
Ecad MO C-C	Clone- Clone	h2b7	14.589	158.223	99.519	360.741	23.634
Ecad MO C-C	Clone- Clone	h2b7	14.589	134.354	100.464	279.44	23.634
Ecad MO C-C	Clone- Clone	h2b7	14.589	123.551	96.788	199.634	23.634
Ecad MO C-C	Clone- Clone
Ecad MO C-C	Clone- Clone	h2b8	12.266	278.397	114.974	1808.351	19.856
Ecad MO C-C	Clone- Clone	h2b8	12.266	218.24	110.276	708.937	19.856
Ecad MO C-C	Clone- Clone	h2b8	12.266	182.897	101.858	866.816	19.856
Ecad MO C-C	Clone- Clone	h2b8	12.266	157.716	99.617	483.966	19.856
Ecad MO C-C	Clone- Clone	h2b8	12.266	136.078	95.394	346.819	19.856
Ecad MO C-C	Clone- Clone
Ecad MO C-C	Clone- Clone	h2b9	10.375	258.704	115.295	1013.64	16.781
Ecad MO C-C	Clone- Clone	h2b9	10.375	244.63	111.283	1012.699	16.781
Ecad MO C-C	Clone- Clone	h2b9	10.375	219.693	105.946	746.214	16.781
Ecad MO C-C	Clone- Clone	h2b9	10.375	189.004	101.112	561.385	16.781
Ecad MO C-C	Clone- Clone	h2b9	10.375	168.212	100.476	493.417	16.781
Ecad MO C-C	Clone- Clone	h2b9	10.375	156.807	99.641	332.326	16.781
Ecad MO C-C	Clone- Clone
Ecad MO C-C	Clone- Clone	h2b10	8.591	216.313	109.686	511.891	13.882
Ecad MO C-C	Clone- Clone	h2b10	8.591	188.374	105.986	379.969	13.882
Ecad MO C-C	Clone- Clone	h2b10	10.321	219.854	100.348	620.94	16.693
Ecad MO C-C	Clone- Clone	h2b10	10.321	188.629	98.011	478.58	16.693
Ecad MO C-C	Clone- Clone	h2b10	10.321	162.195	99.279	373.612	16.693
Ecad MO C-C	Clone- Clone	h2b10	10.321	150.916	99.586	522.43	16.693
Ecad MO C-C	Clone- Clone	h2b10	10.321	144.259	98.672	772.879	16.693
Ecad MO C-C	Clone- Clone	h3b1	8.7	291.879	130.922	1063.47	14.057
Ecad MO C-C	Clone- Clone	h3b1	8.7	289.877	122.281	1375.097	14.057
Ecad MO C-C	Clone- Clone	h3b1	8.7	274.498	116.257	1542.633	14.057
Ecad MO C-C	Clone- Clone	h3b1	8.7	261.254	109.893	1609.835	14.057
Ecad MO C-C	Clone- Clone	h3b1	8.7	233.334	116.352	1633.751	14.057
Ecad MO C-C	Clone- Clone	h3b1	8.7	193.265	107.385	809.783	14.057
Ecad MO C-C	Clone- Clone
Ecad MO C-C	Clone- Clone	h3b2	5.511	360.373	157.271	2317.84	8.874
Ecad MO C-C	Clone- Clone	h3b2	5.511	311.403	154.91	1040.752	8.874
Ecad MO C-C	Clone- Clone	h3b2	5.511	278.719	132.882	723.149	8.874
Ecad MO C-C	Clone- Clone	h3b2	5.511	267.108	131.6	948.969	8.874
Ecad MO C-C	Clone- Clone	h3b2	5.511	249.687	126.296	1165.032	8.874
Ecad MO C-C	Clone- Clone
Ecad MO C-C	Clone- Clone	h3b3	9.834	328.369	120.986	1600.313	15.902
Ecad MO C-C	Clone- Clone	h3b3	9.834	319.058	124.614	2625.086	15.902
Ecad MO C-C	Clone- Clone	h3b3	9.834	319.229	108.237	3876.882	15.902
Ecad MO C-C	Clone- Clone	h3b3	9.834	277.345	113.978	3895.932	15.902
Ecad MO C-C	Clone- Clone	h3b3	9.834	217.141	116.344	1764.978	15.902
Ecad MO C-C	Clone- Clone	h3b3	9.834	182.308	109.671	697.824	15.902
Ecad MO C-C	Clone- Clone
Ecad MO C-C	Clone- Clone	h3b4	7.997	289.216	125.209	777.686	12.915
Ecad MO C-C	Clone- Clone	h3b4	7.997	263.771	123.662	1096.694	12.915
Ecad MO C-C	Clone- Clone	h3b4	7.997	243.66	110.804	1492.22	12.915
Ecad MO C-C	Clone- Clone	h3b4	7.997	229.692	104.775	2238.926	12.915
Ecad MO C-C	Clone- Clone	h3b4	7.997	207.802	101.686	1577.318	12.915
Ecad MO C-C	Clone- Clone
Ecad MO C-C	Clone- Clone	h3b5	8.267	359.903	131.794	1349.341	13.355
Ecad MO C-C	Clone- Clone	h3b5	8.267	317.615	130.92	1836.109	13.355
Ecad MO C-C	Clone- Clone	h3b5	8.267	264.906	119.359	1113.413	13.355
Ecad MO C-C	Clone- Clone	h3b5	8.267	216.201	116.955	694.526	13.355
Ecad MO C-C	Clone- Clone
Ecad MO C-C	Clone- Clone	h4b1	4.215	588.898	183.532	3716.107	6.762
Ecad MO C-C	Clone- Clone	h4b1	4.215	490.958	182.465	1145.934	6.762
Ecad MO C-C	Clone- Clone	h4b1	4.215	394.79	168.824	969.027	6.762
Ecad MO C-C	Clone- Clone	h4b1	4.215	304.068	132.352	572.367	6.762
Ecad MO C-C	Clone- Clone	h4b1	4.215	244.091	128.818	543.198	6.762
Ecad MO C-C	Clone- Clone
Ecad MO C-C	Clone- Clone	h4b2	3.674	590.978	232.64	4081.588	5.887
Ecad MO C-C	Clone- Clone	h4b2	3.674	393.66	190.672	1101.981	5.887
Ecad MO C-C	Clone- Clone	h4b2	3.674	294.194	171.866	520.017	5.887
Ecad MO C-C	Clone- Clone	h4b2	3.674	227.888	134.298	395.691	5.887
Ecad MO C-C	Clone- Clone	h4b2	3.674	186.359	120.85	342.366	5.887
Ecad MO C-C	Clone- Clone
Ecad MO C-C	Clone- Clone	h4b3	9.186	541.387	134.363	1949.541	14.848
Ecad MO C-C	Clone- Clone	h4b3	9.186	468.149	139.448	2590.495	14.848
Ecad MO C-C	Clone- Clone	h4b3	9.186	406.44	148.485	2171.642	14.848
Ecad MO C-C	Clone- Clone	h4b3	9.186	327.669	130.738	958.046	14.848
Ecad MO C-C	Clone- Clone	h4b3	9.186	271.288	129.368	747.26	14.848
Ecad MO C-C	Clone- Clone	h4b3	9.186	259.569	113.07	834.559	14.848
Ecad MO C-C	Clone- Clone
Ecad MO C-C	Clone- Clone	h4b4	6.484	590.727	151.231	4091.101	10.455
Ecad MO C-C	Clone- Clone	h4b4	6.484	661.641	176.456	3282.144	10.455
Ecad MO C-C	Clone- Clone	h4b4	6.484	569.595	190.302	2496.952	10.455
Ecad MO C-C	Clone- Clone	h4b4	6.484	452.202	179.602	1233.751	10.455
Ecad MO C-C	Clone- Clone	h4b4	6.484	393.674	153.244	1520.197	10.455
Ecad MO C-C	Clone- Clone	h4b4	6.484	350.352	129.327	2161.797	10.455
Ecad MO C-C	Clone- Clone
Ecad MO C-C	Clone- Clone	h4b5	10.375	576.044	151.813	3562.304	16.781
Ecad MO C-C	Clone- Clone	h4b5	10.375	508.55	155.526	3009.641	16.781
Ecad MO C-C	Clone- Clone	h4b5	10.375	413.875	138.049	1422.128	16.781
Ecad MO C-C	Clone- Clone	h4b5	10.375	336.415	128.391	2205.696	16.781
Ecad MO C-C	Clone- Clone	h4b5	10.375	295.939	114.552	3774.136	16.781
Ecad MO C-C	Clone- Clone
Ecad MO C-C	Clone- Clone	h4b6	5.349	528.113	148.887	3586.203	8.61
Ecad MO C-C	Clone- Clone	h4b6	5.349	520.396	201.761	3175.892	8.61
Ecad MO C-C	Clone- Clone	h4b6	5.349	483.772	198.91	1497.701	8.61
Ecad MO C-C	Clone- Clone	h4b6	5.349	429.958	193.978	1258.799	8.61
Ecad MO C-C	Clone- Clone	h4b6	5.349	379.541	174.979	1298.817	8.61
Ecad MO C-C	Clone- Clone
Ecad MO C-C	Clone- Clone	h4b7	5.187	452.511	136.354	1274.251	8.347
Ecad MO C-C	Clone- Clone	h4b7	5.187	425.503	176.756	1166.948	8.347
Ecad MO C-C	Clone- Clone	h4b7	5.187	372.011	146.687	1268.97	8.347
Ecad MO C-C	Clone- Clone	h4b7	5.187	323.049	137.263	1384.878	8.347
Ecad MO C-C	Clone- Clone	h4b7	5.187	269.249	125.562	754.76	8.347
Ecad MO C-C	Clone- Clone	h4b7	5.187	217.015	110.176	574.794	8.347
Ecad MO C-C	Clone- Clone	h4b7	5.187	186.837	112.183	544.334	8.347
Ecad MO C-C	Clone- Clone
Ecad MO C-C	Clone- Clone	h4b8	8.267	396.311	168.223	1404.023	13.312
Ecad MO C-C	Clone- Clone	h4b8	8.267	371.225	169.976	1521.681	13.312
Ecad MO C-C	Clone- Clone	h4b8	8.267	343.328	155.132	1963.344	13.312
Ecad MO C-C	Clone- Clone	h4b8	8.267	319.789	131.919	1536.579	13.312
Ecad MO C-C	Clone- Clone	h4b8	8.267	286.483	123.447	1339.466	13.312
Ecad MO C-C	Clone- Clone	h4b8	8.267	253.123	106.672	1063.558	13.312
Ecad MO C-C	Clone- Clone	h4b8	8.267	220.82	104.147	1541.924	13.312
Ecad MO C-C	Clone- Clone
Ecad MO C-C	Clone- Clone	h4b9	9.618	443.42	164.804	1590.331	15.488
Ecad MO C-C	Clone- Clone	h4b9	9.618	395.667	135.495	1234.209	15.488
Ecad MO C-C	Clone- Clone	h4b9	9.618	336.831	118.597	1586.576	15.488
Ecad MO C-C	Clone- Clone	h4b9	9.618	306.344	110.496	3214.288	15.488
Ecad MO C-C	Clone- Clone	h4b9	9.618	293.227	105.105	3612.651	15.488
Ecad MO C-C	Clone- Clone	h4b9	9.618	281.366	108.194	2951.776	15.488
Ecad MO C-C	Clone- Clone	h4b9	9.618	250.592	98.148	1253.076	15.488
Ecad MO C-C	Clone- Clone
Ecad MO C-C	Clone- Clone	h4b10	6.106	506.111	134.571	1858.061	9.827
Ecad MO C-C	Clone- Clone	h4b10	6.106	452.464	164.207	1687.079	9.827
Ecad MO C-C	Clone- Clone	h4b10	6.106	379.257	137.086	1166.922	9.827
Ecad MO C-C	Clone- Clone	h4b10	6.106	287.057	128.197	853.303	9.827
Ecad MO C-C	Clone- Clone	h4b10	6.106	236.87	123.848	975.06	9.827
Ecad MO C-C	Clone- Clone	h4b10	6.106	204.44	115.881	1157.305	9.827
Ecad MO C-C	Clone- Clone
Ecad MO C-C	Clone- Clone	h4b11	9.402	413.2	170.909	1125.236	15.199
Ecad MO C-C	Clone- Clone	h4b11	9.402	397.236	152.44	1449.658	15.199
Ecad MO C-C	Clone- Clone	h4b11	9.402	368.521	147.664	1709.833	15.199
Ecad MO C-C	Clone- Clone	h4b11	9.402	333.666	132.86	1217.471	15.199
Ecad MO C-C	Clone- Clone	h4b11	9.402	281.384	108.041	1073.346	15.199
Ecad MO C-C	Clone- Clone	h4b11	9.402	235.274	107.245	830.026	15.199
Ecad MO C-C	Clone- Clone	h4b11	9.402	202.771	100.715	679.525	15.199
Ecad MO C-C	Clone- Clone	h5b1	9.186	385.479	118.901	4095	14.848
Ecad MO C-C	Clone- Clone	h5b1	9.186	385.479	118.901	4095	14.848
Ecad MO C-C	Clone- Clone	h5b1	9.186	349.551	128.387	4059.476	14.848
Ecad MO C-C	Clone- Clone	h5b1	9.186	245.548	123.905	821.186	14.848
Ecad MO C-C	Clone- Clone	h5b1	11.023	322.488	124.212	1394.417	17.835
Ecad MO C-C	Clone- Clone	h5b1	11.023	277.048	119.412	1976.089	17.835
Ecad MO C-C	Clone- Clone	h5b1	11.023	237.723	118.422	1261.49	17.835
Ecad MO C-C	Clone- Clone	h5b1	11.023	200.174	111.529	465.9	17.835
Ecad MO C-C	Clone- Clone	h5b1	11.023	185.657	113.579	397.057	17.835
Ecad MO C-C	Clone- Clone	h5b1	11.023	179.563	102.072	351.677	17.835
Ecad MO C-C	Clone- Clone
Ecad MO C-C	Clone- Clone	h5b2	11.509	301.878	103.946	1472.305	18.624
Ecad MO C-C	Clone- Clone	h5b2	11.509	317.066	113.037	2487.425	18.624
Ecad MO C-C	Clone- Clone	h5b2	10.321	329.433	131.15	2793.404	16.693
Ecad MO C-C	Clone- Clone	h5b2	10.321	336.076	116.625	1294.096	16.693
Ecad MO C-C	Clone- Clone	h5b2	10.321	320.877	115.493	1407.987	16.693
Ecad MO C-C	Clone- Clone	h5b2	10.321	281.17	132.889	1099.692	16.693
Ecad MO C-C	Clone- Clone	h5b2	10.321	235.236	118.498	667.32	16.693
Ecad MO C-C	Clone- Clone	h5b2	10.321	217.127	120.146	729.3	16.693
Ecad MO C-C	Clone- Clone
Ecad MO C-C	Clone- Clone	h5b3	11.779	302.747	124.058	1703.376	19.065
Ecad MO C-C	Clone- Clone	h5b3	11.779	317.715	128.864	3266.202	19.065
Ecad MO C-C	Clone- Clone	h5b3	11.779	306.805	127.161	2903.224	19.065
Ecad MO C-C	Clone- Clone	h5b3	11.779	281.166	116.718	1531.764	19.065
Ecad MO C-C	Clone- Clone	h5b3	11.779	228.847	115.482	927.582	19.065
Ecad MO C-C	Clone- Clone	h5b3	11.779	203.691	114.794	686.84	19.065
Ecad MO C-C	Clone- Clone	h5b3	11.779	192.543	107.108	811.09	19.065
Ecad MO C-C	Clone- Clone
Ecad MO C-C	Clone- Clone	h6b1	12.32	230.502	94.675	1268.417	19.944
Ecad MO C-C	Clone- Clone	h6b1	12.32	232.347	102.283	934.662	19.944
Ecad MO C-C	Clone- Clone	h6b1	12.32	214.467	101.721	933.166	19.944
Ecad MO C-C	Clone- Clone	h6b1	12.32	176.846	104.191	846.088	19.944
Ecad MO C-C	Clone- Clone	h6b1	12.32	152.911	101.942	414.712	19.944
Ecad MO C-C	Clone- Clone	h6b1	12.32	139.061	98.602	291.213	19.944
Ecad MO C-C	Clone- Clone
Ecad MO C-C	Clone- Clone	h6b2	10.537	212.534	105.016	2122.092	17.045
Ecad MO C-C	Clone- Clone	h6b2	10.537	234.458	101.555	2727.979	17.045
Ecad MO C-C	Clone- Clone	h6b2	10.537	225.614	105.4	2738.242	17.045
Ecad MO C-C	Clone- Clone	h6b2	10.537	197.428	97.082	630.31	17.045
Ecad MO C-C	Clone- Clone	h6b2	10.537	189.264	98.604	846.082	17.045
Ecad MO C-C	Clone- Clone	h6b2	10.537	180.597	101.263	1152.607	17.045
Ecad MO C-C	Clone- Clone	h6b2	10.537	166.954	100.082	717.071	17.045
Ecad MO C-C	Clone- Clone
Ecad MO C-C	Clone- Clone	h6b3	12.104	180.377	98.462	1265.939	19.592
Ecad MO C-C	Clone- Clone	h6b3	12.104	204.001	102.132	1930.206	19.592
Ecad MO C-C	Clone- Clone	h6b3	12.104	203.921	103.908	1428.47	19.592
Ecad MO C-C	Clone- Clone	h6b3	12.104	196.083	102.627	1442.004	19.592
Ecad MO C-C	Clone- Clone	h6b3	12.104	193.633	107.902	765.587	19.592
Ecad MO C-C	Clone- Clone	h6b3	12.104	191.314	109.355	1143.271	19.592
Ecad MO C-C	Clone- Clone	h7b1	7.997	325.054	134.059	795.28	12.915
Ecad MO C-C	Clone- Clone	h7b1	7.997	249.82	130.675	488.701	12.915
Ecad MO C-C	Clone- Clone	h7b1	7.997	219.737	130.478	464.158	12.915
Ecad MO C-C	Clone- Clone	h7b1	7.997	195.934	116.732	381.74	12.915
Ecad MO C-C	Clone- Clone	h7b1	7.997	171.629	110.448	304.057	12.915
Ecad MO C-C	Clone- Clone	h7b1	7.997	158.837	107.306	308.14	12.915
Ecad MO C-C	Clone- Clone
Ecad MO C-C	Clone- Clone	h7b2	8.267	520.779	162.983	2436.309	13.354
Ecad MO C-C	Clone- Clone	h7b2	8.267	510.744	147.659	4002.668	13.354
Ecad MO C-C	Clone- Clone	h7b2	8.267	459.895	141.368	4089.669	13.354
Ecad MO C-C	Clone- Clone	h7b2	8.267	373.953	130.92	2520.98	13.354
Ecad MO C-C	Clone- Clone	h7b2	8.267	328.059	116.257	2572.532	13.354
Ecad MO C-C	Clone- Clone	h7b2	8.267	288.295	112.657	2943.248	13.354
Ecad MO C-C	Clone- Clone	h7b2	8.267	248.347	113.653	2812.659	13.354
Ecad MO C-C	Clone- Clone
Ecad MO C-C	Clone- Clone	h7b3	7.024	580.692	180.515	3557.235	11.334
Ecad MO C-C	Clone- Clone	h7b3	7.024	525.351	189.2	1983.341	11.334
Ecad MO C-C	Clone- Clone	h7b3	7.024	466.227	188.584	2260.431	11.334
Ecad MO C-C	Clone- Clone	h7b3	7.024	434.732	155.266	2403.198	11.334
Ecad MO C-C	Clone- Clone	h7b3	7.024	387.389	153.559	1831.783	11.334
Ecad MO C-C	Clone- Clone	h7b3	7.024	340.713	155.463	1779.79	11.334
Ecad MO C-C	Clone- Clone	h7b3	7.024	303.534	133.285	751.954	11.334
Ecad MO C-C	Clone- Clone
Ecad MO C-C	Clone- Clone	h7b4	5.998	431.249	166.92	2175.941	9.664
Ecad MO C-C	Clone- Clone	h7b4	5.998	421.813	148.779	1917.35	9.664
Ecad MO C-C	Clone- Clone	h7b4	5.998	394.141	171.363	1787.87	9.664
Ecad MO C-C	Clone- Clone	h7b4	5.998	354.867	161.253	1064.398	9.664
Ecad MO C-C	Clone- Clone	h7b4	5.998	307.865	146.221	801.136	9.664
Ecad MO C-C	Clone- Clone	h7b4	5.998	266.177	126.151	775.425	9.664
Ecad MO C-C	Clone- Clone	h7b4	5.998	231.115	122.104	596.876	9.664
Ecad MO C-C	Clone- Clone	h7b4	5.998	211.598	119.678	558.04	9.664
Ecad MO C-C	Clone- Clone	h8b1	6.646	275.867	134.716	774.914	10.719
Ecad MO C-C	Clone- Clone	h8b1	6.646	242.868	135.191	603.885	10.719
Ecad MO C-C	Clone- Clone	h8b1	6.646	227.99	107.444	585.058	10.719
Ecad MO C-C	Clone- Clone	h8b1	6.646	214.937	110.916	565.616	10.719
Ecad MO C-C	Clone- Clone	h8b1	6.646	197.37	109.344	441.654	10.719
Ecad MO C-C	Clone- Clone	h8b1	6.646	169.109	105.348	373.323	10.719
Ecad MO C-C	Clone- Clone
Ecad MO C-C	Clone- Clone	h8b2	5.728	243.583	102.271	695.271	9.225
Ecad MO C-C	Clone- Clone	h8b2	5.728	225.658	111.392	487.67	9.225
Ecad MO C-C	Clone- Clone	h8b2	5.728	185.321	114.907	477.751	9.225
Ecad MO C-C	Clone- Clone	h8b2	5.728	161.323	103.588	278.694	9.225
Ecad MO C-C	Clone- Clone	h8b2	5.728	145.119	100.469	248.428	9.225
Ecad MO C-C	Clone- Clone
Ecad MO C-C	Clone- Clone	h8b3	5.403	304.734	116.833	4091.456	8.698
Ecad MO C-C	Clone- Clone	h8b3	5.403	242.446	113.791	1220.98	8.698
Ecad MO C-C	Clone- Clone	h8b3	5.403	200.606	102.878	841.317	8.698
Ecad MO C-C	Clone- Clone	h8b3	5.403	169.932	95.997	406.653	8.698
Ecad MO C-C	Clone- Clone	h8b3	5.403	155.414	104.277	348.403	8.698
Ecad MO C-C	Clone- Clone
Ecad MO C-C	Clone- Clone	h8b4	6.646	209.195	105.319	700.497	10.719
Ecad MO C-C	Clone- Clone	h8b4	6.646	203.506	110.629	655.804	10.719
Ecad MO C-C	Clone- Clone	h8b4	6.646	193.631	105.789	583.985	10.719
Ecad MO C-C	Clone- Clone	h8b4	6.646	175.716	104.344	591.224	10.719
Ecad MO C-C	Clone- Clone	h8b4	6.646	165.373	99.942	1044.42	10.719
Ecad MO C-C	Clone- Clone
Ecad MO C-C	Clone- Clone	h8b5	9.564	237.719	119.621	733.13	15.463
Ecad MO C-C	Clone- Clone	h8b5	9.564	210.514	111.161	498.06	15.463
Ecad MO C-C	Clone- Clone	h8b5	9.564	204.819	103.58	647.46	15.463
Ecad MO C-C	Clone- Clone	h8b5	9.564	206.186	97.684	706.949	15.463
Ecad MO C-C	Clone- Clone	h8b5	9.564	196.203	100.027	596.851	15.463
Ecad MO C-C	Clone- Clone
Ecad MO C-C	Clone- Clone	h8b6	6.538	290.589	123.249	1013.604	10.543
Ecad MO C-C	Clone- Clone	h8b6	6.538	262.704	123.525	640.44	10.543
Ecad MO C-C	Clone- Clone	h8b6	6.538	222.744	117.463	726.727	10.543
Ecad MO C-C	Clone- Clone	h8b6	6.538	200.054	114.721	500.22	10.543
Ecad MO C-C	Clone- Clone	h8b6	6.538	180.583	107.269	340.125	10.543
Ecad MO C-C	Clone- Clone
Ecad MO C-C	Clone- Clone	h8b7	10.645	377.687	139.287	1439.204	17.22
Ecad MO C-C	Clone- Clone	h8b7	10.645	363.228	139.644	1438.658	17.22
Ecad MO C-C	Clone- Clone	h8b7	10.645	276.517	114.839	770.886	17.22
Ecad MO C-C	Clone- Clone	h8b7	10.645	195.448	110.246	357.962	17.22
Ecad MO C-C	Clone- Clone	h8b7	10.645	169.358	107.244	333.656	17.22
Ecad MO N-C	Non Clone- Clone	h1b1	12.104	476.266	110.441	3969.673	19.593
Ecad MO N-C	Non Clone- Clone	h1b1	12.158	465.132	109.754	2082.216	19.68
Ecad MO N-C	Non Clone- Clone	h1b1	12.158	392.835	105.756	1444.804	19.68
Ecad MO N-C	Non Clone- Clone	h1b1	12.158	317.562	99.049	1287.156	19.68
Ecad MO N-C	Non Clone- Clone	h1b1	12.158	245.269	102.821	1199.11	19.68
Ecad MO N-C	Non Clone- Clone	h1b1	12.158	204.149	100.525	766.989	19.68
Ecad MO N-C	Non Clone- Clone	h1b1	12.158	183.016	104.138	657.198	19.68
Ecad MO N-C	Non Clone- Clone
Ecad MO N-C	Non Clone- Clone	h1b2	8.97	463.723	137.918	1955.135	14.497
Ecad MO N-C	Non Clone- Clone	h1b2	8.97	484.003	141.52	2536.046	14.497
Ecad MO N-C	Non Clone- Clone	h1b2	8.97	425.622	160.76	2640.093	14.497
Ecad MO N-C	Non Clone- Clone	h1b2	8.97	367.066	146.604	1776.357	14.497
Ecad MO N-C	Non Clone- Clone	h1b2	8.97	280.627	128.619	809.112	14.497
Ecad MO N-C	Non Clone- Clone
Ecad MO N-C	Non Clone- Clone	h1b3	16.48	448.623	112.001	2110.59	26.709
Ecad MO N-C	Non Clone- Clone	h1b3	16.48	423.417	118.917	1668.646	26.709
Ecad MO N-C	Non Clone- Clone	h1b3	16.48	380.36	111.406	1358.577	26.709
Ecad MO N-C	Non Clone- Clone	h1b3	18.318	427.837	142.507	3357.801	29.696
Ecad MO N-C	Non Clone- Clone	h1b3	18.318	412.609	122.63	3021.832	29.696
Ecad MO N-C	Non Clone- Clone	h1b3	18.318	374.222	120.815	1567.797	29.696
Ecad MO N-C	Non Clone- Clone	h1b3	18.318	328.827	114.853	1751.134	29.696
Ecad MO N-C	Non Clone- Clone	h1b3	18.318	289.783	105.758	1993.77	29.696
Ecad MO N-C	Non Clone- Clone
Ecad MO N-C	Non Clone- Clone	h1b4	13.995	452.396	136.878	2969.585	22.668
Ecad MO N-C	Non Clone- Clone	h1b4	13.995	461.211	100.431	2153.09	22.668
Ecad MO N-C	Non Clone- Clone	h1b4	13.995	454.075	120.209	2500.67	22.668
Ecad MO N-C	Non Clone- Clone	h1b4	13.995	429.954	113.782	4045.44	22.668
Ecad MO N-C	Non Clone- Clone	h1b4	13.995	382.783	101.651	4095	22.668
Ecad MO N-C	Non Clone- Clone	h1b4	13.995	310.004	94.294	3751.957	22.668
Ecad MO N-C	Non Clone- Clone	h1b4	13.995	246.044	97.382	1247.848	22.668
Ecad MO N-C	Non Clone- Clone
Ecad MO N-C	Non Clone- Clone	h1b5	8.916	364.571	116.787	1624.141	14.409
Ecad MO N-C	Non Clone- Clone	h1b5	8.916	384.333	110.96	2256.178	14.409
Ecad MO N-C	Non Clone- Clone	h1b5	8.916	401.1	134.003	2503.224	14.409
Ecad MO N-C	Non Clone- Clone	h1b5	8.916	375.628	125.347	1313.717	14.409
Ecad MO N-C	Non Clone- Clone	h1b5	8.916	337.342	131.84	1282.242	14.409
Ecad MO N-C	Non Clone- Clone	h1b5	8.916	311.701	124.436	1257.709	14.409
Ecad MO N-C	Non Clone- Clone	h1b5	8.916	279.69	116.145	1213.775	14.409
Ecad MO N-C	Non Clone- Clone
Ecad MO N-C	Non Clone- Clone
Ecad MO N-C	Non Clone- Clone	h2b1	6.97	330.407	109.737	4095	11.246
Ecad MO N-C	Non Clone- Clone	h2b1	6.97	341.495	120.822	3331.917	11.246
Ecad MO N-C	Non Clone- Clone	h2b1	6.97	291.867	114.368	930.451	11.246
Ecad MO N-C	Non Clone- Clone	h2b1	6.97	238.709	123.879	631.19	11.246
Ecad MO N-C	Non Clone- Clone	h2b1	6.97	199.347	110.003	644.718	11.246
Ecad MO N-C	Non Clone- Clone
Ecad MO N-C	Non Clone- Clone	h2b2	11.779	426.957	120.478	2277.968	19.06
Ecad MO N-C	Non Clone- Clone	h2b2	11.779	406.699	150.098	1060.113	19.06
Ecad MO N-C	Non Clone- Clone	h2b2	11.779	351.008	148.787	813.245	19.06
Ecad MO N-C	Non Clone- Clone	h2b2	11.779	309.416	118.035	911.713	19.06
Ecad MO N-C	Non Clone- Clone	h2b2	11.779	291.676	128.35	1038.248	19.06
Ecad MO N-C	Non Clone- Clone	h2b2	11.779	289.143	121.902	1179.733	19.06
Ecad MO N-C	Non Clone- Clone
Ecad MO N-C	Non Clone- Clone	h2b3	6.16	390.689	128.002	1314.99	9.928
Ecad MO N-C	Non Clone- Clone	h2b3	6.16	391.895	124.994	1686.53	9.928
Ecad MO N-C	Non Clone- Clone	h2b3	6.16	379.872	138.968	1807.912	9.928
Ecad MO N-C	Non Clone- Clone	h2b3	6.16	351.624	127.989	2786.094	9.928
Ecad MO N-C	Non Clone- Clone	h2b3	6.16	313.841	129.033	2199.95	9.928
Ecad MO N-C	Non Clone- Clone	h2b3	6.16	285.199	120.978	1147.871	9.928
Ecad MO N-C	Non Clone- Clone
Ecad MO N-C	Non Clone- Clone	h2b4	9.564	359.212	125.645	1953.7	15.463
Ecad MO N-C	Non Clone- Clone	h2b4	9.564	281.269	121.083	968.996	15.463
Ecad MO N-C	Non Clone- Clone	h2b4	9.564	249.512	119.349	1867.048	15.463
Ecad MO N-C	Non Clone- Clone	h2b4	9.564	238.403	112.036	3287.606	15.463
Ecad MO N-C	Non Clone- Clone
Ecad MO N-C	Non Clone- Clone	h2b5	10.321	341.738	126.576	1752.14	16.693
Ecad MO N-C	Non Clone- Clone	h2b5	10.321	297.574	123.37	945.49	16.693
Ecad MO N-C	Non Clone- Clone	h2b5	10.321	234.248	119.37	486.411	16.693
Ecad MO N-C	Non Clone- Clone	h2b5	10.321	208.877	119.652	512.673	16.693
Ecad MO N-C	Non Clone- Clone	h2b5	10.321	191.281	105.714	431.324	16.693
Ecad MO N-C	Non Clone- Clone
Ecad MO N-C	Non Clone- Clone	h2b6	6.43	304.877	113.604	1246.945	10.367
Ecad MO N-C	Non Clone- Clone	h2b6	6.43	326.339	113.591	1583.739	10.367
Ecad MO N-C	Non Clone- Clone	h2b6	6.43	288.649	131.546	1129.499	10.367
Ecad MO N-C	Non Clone- Clone	h2b6	6.43	231.008	128.541	1055.754	10.367
Ecad MO N-C	Non Clone- Clone	h2b6	6.43	210.646	114.149	2534.123	10.367
Ecad MO N-C	Non Clone- Clone	h3b1	12.428	338.105	123.657	1722.284	20.12
Ecad MO N-C	Non Clone- Clone	h3b1	12.428	296.447	132.475	1012.536	20.12
Ecad MO N-C	Non Clone- Clone	h3b1	12.428	248.813	126.588	520.638	20.12
Ecad MO N-C	Non Clone- Clone	h3b1	12.428	216.286	108.539	858.319	20.12
Ecad MO N-C	Non Clone- Clone	h3b1	12.428	203.701	109.037	1239.605	20.12
Ecad MO N-C	Non Clone- Clone
Ecad MO N-C	Non Clone- Clone	h3b2	6.7	416.753	151.779	2033.731	10.807
Ecad MO N-C	Non Clone- Clone	h3b2	6.7	402.611	170.041	1604.438	10.807
Ecad MO N-C	Non Clone- Clone	h3b2	6.7	365.697	162.486	1749.62	10.807
Ecad MO N-C	Non Clone- Clone	h3b2	6.7	354.556	143.437	2313.031	10.807
Ecad MO N-C	Non Clone- Clone
Ecad MO N-C	Non Clone- Clone	h3b3	9.672	291.931	105.194	1295.62	15.639
Ecad MO N-C	Non Clone- Clone	h3b3	9.672	265.299	110.552	815.866	15.639
Ecad MO N-C	Non Clone- Clone	h3b3	9.672	234.317	107.902	995.655	15.639
Ecad MO N-C	Non Clone- Clone	h3b3	9.672	219.332	106.116	965.238	15.639
Ecad MO N-C	Non Clone- Clone	h3b3	9.672	209.612	102.441	767.292	15.639
Ecad MO N-C	Non Clone- Clone
Ecad MO N-C	Non Clone- Clone	h3b4	13.4	449.82	114.439	3171.964	21.701
Ecad MO N-C	Non Clone- Clone	h3b4	13.4	403.702	118.734	3062.834	21.701
Ecad MO N-C	Non Clone- Clone	h3b4	13.4	315.366	117.538	1531.018	21.701
Ecad MO N-C	Non Clone- Clone	h3b4	13.4	242.873	111.196	921.447	21.701
Ecad MO N-C	Non Clone- Clone	h3b4	13.4	187.538	104.22	514.281	21.701
Ecad MO N-C	Non Clone- Clone
Ecad MO N-C	Non Clone- Clone	h3b5	15.292	441.524	123.386	1534.468	24.776
Ecad MO N-C	Non Clone- Clone	h3b5	15.292	383.11	139.699	1411.903	24.776
Ecad MO N-C	Non Clone- Clone	h3b5	15.292	310.462	131.794	1133.152	24.776
Ecad MO N-C	Non Clone- Clone	h3b5	15.292	264.063	118.973	1092.046	24.776
Ecad MO N-C	Non Clone- Clone	h3b5	15.292	232.155	120.085	1036.934	24.776
Ecad MO N-C	Non Clone- Clone	h4b1	9.456	642.652	189.959	3161.564	15.287
Ecad MO N-C	Non Clone- Clone	h4b1	9.456	601.929	200.069	2750.754	15.287
Ecad MO N-C	Non Clone- Clone	h4b1	9.456	508.684	207.594	1759.148	15.287
Ecad MO N-C	Non Clone- Clone	h4b1	9.456	377.549	148.822	964.627	15.287
Ecad MO N-C	Non Clone- Clone	h4b1	9.456	294.898	144.65	684.809	15.287
Ecad MO N-C	Non Clone- Clone	h4b1	9.456	242.785	122.419	515.766	15.287
Ecad MO N-C	Non Clone- Clone
Ecad MO N-C	Non Clone- Clone	h4b2	8.591	568.192	149.6	2380.066	13.881
Ecad MO N-C	Non Clone- Clone	h4b2	8.591	492.793	156.036	1758.865	13.881
Ecad MO N-C	Non Clone- Clone	h4b2	8.591	394.566	140.495	1511.083	13.881
Ecad MO N-C	Non Clone- Clone	h4b2	8.591	303.74	142.687	1662.621	13.881
Ecad MO N-C	Non Clone- Clone	h4b2	8.591	229.79	117.364	1120.158	13.881
Ecad MO N-C	Non Clone- Clone	h4b2	8.591	189.411	111.448	579.058	13.881
Ecad MO N-C	Non Clone- Clone
Ecad MO N-C	Non Clone- Clone	h4b3	7.997	503.928	140.152	1676.673	12.915
Ecad MO N-C	Non Clone- Clone	h4b3	7.997	473.047	151.105	1491.529	12.915
Ecad MO N-C	Non Clone- Clone	h4b3	7.997	408.558	134.827	1526.303	12.915
Ecad MO N-C	Non Clone- Clone	h4b3	7.997	325.281	168.341	1036.049	12.915
Ecad MO N-C	Non Clone- Clone	h4b3	7.997	258.673	134.525	613.01	12.915
Ecad MO N-C	Non Clone- Clone	h4b3	7.997	222.667	119.639	762.729	12.915
Ecad MO N-C	Non Clone- Clone
Ecad MO N-C	Non Clone- Clone	h4b4	6.43	706.599	187.196	3518.084	10.367
Ecad MO N-C	Non Clone- Clone	h4b4	6.43	736.73	194.196	2934.082	10.367
Ecad MO N-C	Non Clone- Clone	h4b4	6.43	641.421	196.026	1658.363	10.367
Ecad MO N-C	Non Clone- Clone	h4b4	6.43	516.771	198.228	1149.322	10.367
Ecad MO N-C	Non Clone- Clone	h4b4	6.43	391.261	169.279	856.767	10.367
Ecad MO N-C	Non Clone- Clone	h4b4	6.43	301.781	138.726	587.901	10.367
Ecad MO N-C	Non Clone- Clone
Ecad MO N-C	Non Clone- Clone	h4b5	7.619	856.929	280.626	3648.744	12.3
Ecad MO N-C	Non Clone- Clone	h4b5	7.619	820.968	294.985	3534.698	12.3
Ecad MO N-C	Non Clone- Clone	h4b5	7.619	752.394	307.139	3322.983	12.3
Ecad MO N-C	Non Clone- Clone	h4b5	7.619	647.11	229.301	4018.058	12.3
Ecad MO N-C	Non Clone- Clone	h4b5	7.619	515.189	149.447	3730.509	12.3
Ecad MO N-C	Non Clone- Clone	h4b5	7.619	383.24	122.617	1407.364	12.3
Ecad MO N-C	Non Clone- Clone
Ecad MO N-C	Non Clone- Clone	h4b6	8.375	573.601	131.727	4095	13.53
Ecad MO N-C	Non Clone- Clone	h4b6	8.375	505.207	144.221	3495.058	13.53
Ecad MO N-C	Non Clone- Clone	h4b6	8.375	413.265	142.333	3261.617	13.53
Ecad MO N-C	Non Clone- Clone	h4b6	8.375	322.563	150.865	2767.992	13.53
Ecad MO N-C	Non Clone- Clone	h4b6	8.375	243.095	118.689	965.273	13.53
Ecad MO N-C	Non Clone- Clone
Ecad MO N-C	Non Clone- Clone	h4b7	4.485	795.128	181.864	4055.021	7.204
Ecad MO N-C	Non Clone- Clone	h4b7	4.485	696.378	163.727	2201.368	7.204
Ecad MO N-C	Non Clone- Clone	h4b7	4.485	586.438	171.532	1476.909	7.204
Ecad MO N-C	Non Clone- Clone	h4b7	4.485	493.986	177.391	1302.268	7.204
Ecad MO N-C	Non Clone- Clone	h4b7	4.485	389.546	159.889	846.846	7.204
Ecad MO N-C	Non Clone- Clone	h5b4	10.375	531.656	164.295	2366.608	16.781
Ecad MO N-C	Non Clone- Clone	h5b4	10.375	550.287	178.56	3058.218	16.781
Ecad MO N-C	Non Clone- Clone	h5b4	10.375	533.454	168.605	2903.836	16.781
Ecad MO N-C	Non Clone- Clone	h5b4	10.375	449.491	162.903	1899.572	16.781
Ecad MO N-C	Non Clone- Clone	h5b4	10.375	354.291	150.801	1563.787	16.781
Ecad MO N-C	Non Clone- Clone	h5b4	10.375	270.403	116.173	766.719	16.781
Ecad MO N-C	Non Clone- Clone	h5b4	10.375	217.507	110.876	660.158	16.781
Ecad MO N-C	Non Clone- Clone	h5b4	10.375	200.179	108.918	612.101	16.781
Ecad MO N-C	Non Clone- Clone
Ecad MO N-C	Non Clone- Clone	h5b5	9.024	364.186	124.046	1341.444	14.584
Ecad MO N-C	Non Clone- Clone	h5b5	9.024	314.861	142.83	1479.205	14.584
Ecad MO N-C	Non Clone- Clone	h5b5	9.024	274.028	135.605	861.31	14.584
Ecad MO N-C	Non Clone- Clone	h5b5	9.024	260.726	121.268	582.904	14.584
Ecad MO N-C	Non Clone- Clone	h5b5	9.024	271.067	118.273	927.589	14.584
Ecad MO N-C	Non Clone- Clone
Ecad MO N-C	Non Clone- Clone	h5b6	7.727	344.315	130.226	2205.922	12.475
Ecad MO N-C	Non Clone- Clone	h5b6	7.727	324.823	129.895	1801.621	12.475
Ecad MO N-C	Non Clone- Clone	h5b6	7.727	303.122	132.441	1684.226	12.475
Ecad MO N-C	Non Clone- Clone	h5b6	7.727	262.443	120.844	636.846	12.475
Ecad MO N-C	Non Clone- Clone	h5b6	7.727	215.787	117.744	571.553	12.475
Ecad MO N-C	Non Clone- Clone
Ecad MO N-C	Non Clone- Clone	h5b7	9.564	484.449	168.608	3864.605	15.463
Ecad MO N-C	Non Clone- Clone	h5b7	9.564	432.124	176.86	4028.397	15.463
Ecad MO N-C	Non Clone- Clone	h5b7	9.564	354.066	157.906	2115.612	15.463
Ecad MO N-C	Non Clone- Clone	h5b7	9.564	276.839	129.38	738.101	15.463
Ecad MO N-C	Non Clone- Clone	h5b7	9.564	233.907	126.12	593.264	15.463
Ecad MO N-C	Non Clone- Clone	h5b7	9.564	225.645	119.711	694.974	15.463
Ecad MO N-C	Non Clone- Clone
Ecad MO N-C	Non Clone- Clone	h5b8	10.429	521.82	120.986	3654.187	16.869
Ecad MO N-C	Non Clone- Clone	h5b8	10.429	452.27	113.758	1724.404	16.869
Ecad MO N-C	Non Clone- Clone	h5b8	10.429	357.087	107.424	1328.011	16.869
Ecad MO N-C	Non Clone- Clone	h5b8	10.429	292.104	104.529	1943.162	16.869
Ecad MO N-C	Non Clone- Clone	h5b8	10.429	262.399	101.931	2289.888	16.869
Ecad MO N-C	Non Clone- Clone	h5b8	10.429	238.405	102.058	1037.054	16.869
Ecad MO N-C	Non Clone- Clone
Ecad MO N-C	Non Clone- Clone	h5b9	9.564	527.523	137.489	2954.299	15.463
Ecad MO N-C	Non Clone- Clone	h5b9	9.564	576.135	126.617	2447.322	15.463
Ecad MO N-C	Non Clone- Clone	h5b9	9.564	566.335	154.844	1370.387	15.463
Ecad MO N-C	Non Clone- Clone	h5b9	9.564	512.008	158.209	1261.471	15.463
Ecad MO N-C	Non Clone- Clone	h5b9	9.564	456.407	166.681	1060.843	15.463
Ecad MO N-C	Non Clone- Clone	h5b9	9.564	412.187	136.436	934.498	15.463
Ecad MO N-C	Non Clone- Clone	h5b9	9.564	356.186	141.669	725.164	15.463
Ecad MO N-C	Non Clone- Clone	h5b9	9.564	315.54	139.988	621.469	15.463
Ecad MO N-C	Non Clone- Clone
Ecad MO N-C	Non Clone- Clone	h5b10	11.725	452.809	125.864	2510.183	18.977
Ecad MO N-C	Non Clone- Clone	h5b10	11.725	383.775	144.858	1771.997	18.977
Ecad MO N-C	Non Clone- Clone	h5b10	11.725	314.854	125.81	1625.531	18.977
Ecad MO N-C	Non Clone- Clone	h5b10	11.725	259.414	128.716	622.726	18.977
Ecad MO N-C	Non Clone- Clone	h5b10	11.725	223.691	108.876	635.599	18.977
Ecad MO N-C	Non Clone- Clone	h5b10	11.725	211.321	117.492	680.768	18.977
Ecad MO N-C	Non Clone- Clone
Ecad MO N-C	Non Clone- Clone	h5b11	10.158	516.975	140.845	2696.218	16.429
Ecad MO N-C	Non Clone- Clone	h5b11	10.158	456.65	159.742	1923.195	16.429
Ecad MO N-C	Non Clone- Clone	h5b11	10.158	379.18	141.129	1557.125	16.429
Ecad MO N-C	Non Clone- Clone	h5b11	10.158	352.977	133.739	1687.606	16.429
Ecad MO N-C	Non Clone- Clone	h5b11	10.158	347.188	132.729	1657.345	16.429
Ecad MO N-C	Non Clone- Clone	h5b11	10.158	321.839	115.351	1939.252	16.429
Ecad MO N-C	Non Clone- Clone
Ecad MO N-C	Non Clone- Clone	h5b12	7.835	611.808	187.975	2319.828	12.652
Ecad MO N-C	Non Clone- Clone	h5b12	7.835	636.961	206.644	2829.8	12.652
Ecad MO N-C	Non Clone- Clone	h5b12	7.835	619.18	229.829	2163.731	12.652
Ecad MO N-C	Non Clone- Clone	h5b12	7.835	479.585	186.661	1060.507	12.652
Ecad MO N-C	Non Clone- Clone	h5b12	7.835	310.652	159.828	584.122	12.652
Ecad MO N-C	Non Clone- Clone	h5b12	7.835	251.924	136.174	670.14	12.652
Ecad MO N-C	Non Clone- Clone	h6b1	3.62	343.257	145.777	1422.222	5.799
Ecad MO N-C	Non Clone- Clone	h6b1	3.62	334.075	145.262	975.957	5.799
Ecad MO N-C	Non Clone- Clone	h6b1	3.62	290.241	151.314	597.102	5.799
Ecad MO N-C	Non Clone- Clone	h6b1	3.62	238.826	134.662	468.631	5.799
Ecad MO N-C	Non Clone- Clone	h6b1	3.62	220.235	135.199	533.176	5.799
Ecad MO N-C	Non Clone- Clone	h6b1	3.62	217.422	124.696	763.422	5.799
Ecad MO N-C	Non Clone- Clone
Ecad MO N-C	Non Clone- Clone	h6b2	9.132	383.587	131.876	1459.987	14.76
Ecad MO N-C	Non Clone- Clone	h6b2	9.132	335.303	150.173	1052.57	14.76
Ecad MO N-C	Non Clone- Clone	h6b2	9.132	272.722	139.154	698.431	14.76
Ecad MO N-C	Non Clone- Clone	h6b2	9.132	234.982	123.225	449.769	14.76
Ecad MO N-C	Non Clone- Clone	h6b2	9.132	227.833	120.087	728.015	14.76
Ecad MO N-C	Non Clone- Clone
Ecad MO N-C	Non Clone- Clone	h6b3	7.889	340.275	110.82	1580.459	12.74
Ecad MO N-C	Non Clone- Clone	h6b3	7.889	291.458	121.792	1009.171	12.74
Ecad MO N-C	Non Clone- Clone	h6b3	7.889	231.661	108.374	669.091	12.74
Ecad MO N-C	Non Clone- Clone	h6b3	7.889	186.927	105.367	359.912	12.74
Ecad MO N-C	Non Clone- Clone	h6b3	7.889	173.651	103.358	410.224	12.74
Ecad MO N-C	Non Clone- Clone
Ecad MO N-C	Non Clone- Clone	h6b4	8.97	276.939	128.254	1423.499	14.497
Ecad MO N-C	Non Clone- Clone	h6b4	8.97	250.156	109.735	974.574	14.497
Ecad MO N-C	Non Clone- Clone	h6b4	8.97	218.126	107.537	1167.08	14.497
Ecad MO N-C	Non Clone- Clone	h6b4	8.97	183.359	104.477	843.773	14.497
Ecad MO N-C	Non Clone- Clone	h6b4	8.97	164.427	104.891	625.849	14.497
Ecad MO N-C	Non Clone- Clone
Ecad MO N-C	Non Clone- Clone	h6b5	7.133	339.629	115.266	3636.868	11.509
Ecad MO N-C	Non Clone- Clone	h6b5	7.133	308.662	127.627	1309.322	11.509
Ecad MO N-C	Non Clone- Clone	h6b5	7.133	247	119.083	757.83	11.509
Ecad MO N-C	Non Clone- Clone	h6b5	7.133	209.926	113.757	513.393	11.509
Ecad MO N-C	Non Clone- Clone	h6b5	7.133	190.669	101.62	710.516	11.509
Ecad MO N-C	Non Clone- Clone
Ecad MO N-C	Non Clone- Clone	h6b6	5.998	247.615	122.532	601.768	9.664
Ecad MO N-C	Non Clone- Clone	h6b6	5.998	224.803	120.774	484.909	9.664
Ecad MO N-C	Non Clone- Clone	h6b6	5.998	195.223	110.907	465.617	9.664
Ecad MO N-C	Non Clone- Clone	h6b6	5.998	165.387	103.878	416.59	9.664
Ecad MO N-C	Non Clone- Clone	h6b6	5.998	142.259	102.255	390.209	9.664
Ecad MO N-C	Non Clone- Clone	h6b6	5.998	129.535	99.475	216.876	9.664
Ecad MO N-C	Non Clone- Clone
Ecad MO N-C	Non Clone- Clone	h6b7	6.322	327.087	106.442	1397.266	10.192
Ecad MO N-C	Non Clone- Clone	h6b7	6.322	282.874	113.542	1407.602	10.192
Ecad MO N-C	Non Clone- Clone	h6b7	6.322	227.313	114.143	1341.483	10.192
Ecad MO N-C	Non Clone- Clone	h6b7	6.322	198.225	109.249	1513.182	10.192
Ecad MO N-C	Non Clone- Clone	h6b7	6.322	166.726	104.127	576.232	10.192
Ecad MO N-C	Non Clone- Clone
Ecad MO N-C	Non Clone- Clone	h6b8	5.511	390.245	109.819	1605.799	8.874
Ecad MO N-C	Non Clone- Clone	h6b8	5.511	351.046	122.029	1927.233	8.874
Ecad MO N-C	Non Clone- Clone	h6b8	5.511	281.377	121.28	1009.026	8.874
Ecad MO N-C	Non Clone- Clone	h6b8	5.511	221.734	122.118	841.99	8.874
Ecad MO N-C	Non Clone- Clone	h6b8	5.511	190.868	115.217	418.902	8.874
Ecad MO N-C	Non Clone- Clone	h7b1	12.05	554.877	171.969	1906.343	19.504
Ecad MO N-C	Non Clone- Clone	h7b1	12.05	476.677	154.734	1789.302	19.504
Ecad MO N-C	Non Clone- Clone	h7b1	12.05	388.395	143.888	1415.271	19.504
Ecad MO N-C	Non Clone- Clone	h7b1	12.05	317.273	129.312	873.144	19.504
Ecad MO N-C	Non Clone- Clone	h7b1	12.05	279.386	123.229	568.37	19.504
Ecad MO N-C	Non Clone- Clone	h7b1	12.05	248.652	135.081	453.089	19.504
Ecad MO N-C	Non Clone- Clone	h7b1	12.05	210.605	119.621	425.697	19.504
Ecad MO N-C	Non Clone- Clone
Ecad MO N-C	Non Clone- Clone	h7b2	8.97	464.63	149.157	2215.049	14.497
Ecad MO N-C	Non Clone- Clone	h7b2	8.97	458.265	188.941	2727.529	14.497
Ecad MO N-C	Non Clone- Clone	h7b2	8.97	456.051	175.402	1963.874	14.497
Ecad MO N-C	Non Clone- Clone	h7b2	8.97	435.696	136.064	1950.872	14.497
Ecad MO N-C	Non Clone- Clone	h7b2	8.97	405.366	123.158	1877.72	14.497
Ecad MO N-C	Non Clone- Clone	h7b2	8.97	369.2	114.154	1656.84	14.497
Ecad MO N-C	Non Clone- Clone	h7b2	8.97	320.123	107.154	1322.822	14.497
Ecad MO N-C	Non Clone- Clone	h7b2	8.97	270.3	100.345	1434.407	14.497
Ecad MO N-C	Non Clone- Clone
Ecad MO N-C	Non Clone- Clone	h7b3	7.187	708.175	203.951	2245.457	11.597
Ecad MO N-C	Non Clone- Clone	h7b3	7.187	618.687	228.181	1916.65	11.597
Ecad MO N-C	Non Clone- Clone	h7b3	7.187	526.868	228.661	1275.002	11.597
Ecad MO N-C	Non Clone- Clone	h7b3	7.187	418.668	206.297	1380.024	11.597
Ecad MO N-C	Non Clone- Clone	h7b3	7.187	332.004	172.621	1174.712	11.597
Ecad MO N-C	Non Clone- Clone	h7b3	7.187	267.417	142.792	697.462	11.597
Ecad MO N-C	Non Clone- Clone
Ecad MO N-C	Non Clone- Clone	h7b4	10.212	757.84	218.841	3874.476	16.517
Ecad MO N-C	Non Clone- Clone	h7b4	10.212	739.469	251.722	4095	16.517
Ecad MO N-C	Non Clone- Clone	h7b4	10.212	683.362	231.738	4095	16.517
Ecad MO N-C	Non Clone- Clone	h7b4	10.212	617.054	230.044	2457.138	16.517
Ecad MO N-C	Non Clone- Clone	h7b4	10.212	573.412	195.173	1665.716	16.517
Ecad MO N-C	Non Clone- Clone	h7b4	10.212	530.024	208.144	1762.144	16.517
Ecad MO N-C	Non Clone- Clone	h7b4	10.212	474.797	154.627	1404.209	16.517
Ecad MO N-C	Non Clone- Clone
Ecad MO N-C	Non Clone- Clone	h7b5	9.672	563.608	167.506	4094.824	15.639
Ecad MO N-C	Non Clone- Clone	h7b5	9.672	501.706	164.98	2586.488	15.639
Ecad MO N-C	Non Clone- Clone	h7b5	9.672	429.967	162.911	1538.172	15.639
Ecad MO N-C	Non Clone- Clone	h7b5	9.672	395.883	150.674	1152.709	15.639
Ecad MO N-C	Non Clone- Clone	h7b5	9.672	374.946	145.273	1230.027	15.639
Ecad MO N-C	Non Clone- Clone
Ecad MO N-C	Non Clone- Clone	h7b6	9.618	668.417	206.454	2493.494	15.551
Ecad MO N-C	Non Clone- Clone	h7b6	9.618	582.973	198.479	2588.466	15.551
Ecad MO N-C	Non Clone- Clone	h7b6	9.618	441.96	163.011	1350.526	15.551
Ecad MO N-C	Non Clone- Clone	h7b6	9.618	349.731	151.814	886.636	15.551
Ecad MO N-C	Non Clone- Clone	h7b6	9.618	300.254	137.571	706.778	15.551
Ecad MO N-C	Non Clone- Clone	h7b6	9.618	287.176	126.602	816.934	15.551
Ecad MO N-C	Non Clone- Clone
Ecad MO N-C	Non Clone- Clone	h7b7	7.673	475.73	131.095	1934.16	12.388
Ecad MO N-C	Non Clone- Clone	h7b7	7.673	406.344	132.402	1346.013	12.388
Ecad MO N-C	Non Clone- Clone	h7b7	7.673	324.101	129.532	1050.937	12.388
Ecad MO N-C	Non Clone- Clone	h7b7	7.673	265.56	111.806	1087.176	12.388
Ecad MO N-C	Non Clone- Clone	h7b7	7.673	229.736	115.014	845.848	12.388
Ecad MO N-C	Non Clone- Clone
Ecad MO N-C	Non Clone- Clone	h7b8	9.402	545.13	158.824	3675.385	15.2
Ecad MO N-C	Non Clone- Clone	h7b8	9.402	496.235	160.08	1954.86	15.2
Ecad MO N-C	Non Clone- Clone	h7b8	9.402	438.014	166.36	1430.095	15.2
Ecad MO N-C	Non Clone- Clone	h7b8	9.402	398.351	154.104	1871.426	15.2
Ecad MO N-C	Non Clone- Clone	h7b8	9.402	377.499	138.025	1947.533	15.2
Ecad MO N-C	Non Clone- Clone
Ecad MO N-C	Non Clone- Clone	h7b9	8.213	630.941	290.429	1857.765	13.267
Ecad MO N-C	Non Clone- Clone	h7b9	8.213	623.18	283.986	2311.456	13.267
Ecad MO N-C	Non Clone- Clone	h7b9	8.213	623.307	266.777	2923.207	13.267
Ecad MO N-C	Non Clone- Clone	h7b9	8.213	610.519	226.755	3226.151	13.267
Ecad MO N-C	Non Clone- Clone	h7b9	8.213	579.268	190.534	1728.341	13.267
Ecad MO N-C	Non Clone- Clone	h7b9	8.213	543.74	164.935	1863.298	13.267
Ecad MO N-C	Non Clone- Clone	h7b9	8.213	543.74	164.935	1863.298	13.267
Ecad MO N-C	Non Clone- Clone	h8b1	9.024	405.577	123.487	1244.787	14.585
Ecad MO N-C	Non Clone- Clone	h8b1	9.024	456.034	131.141	1298.557	14.585
Ecad MO N-C	Non Clone- Clone	h8b1	9.024	383.157	134.647	921.402	14.585
Ecad MO N-C	Non Clone- Clone	h8b1	9.024	271.337	124.606	584.262	14.585
Ecad MO N-C	Non Clone- Clone	h8b1	9.024	196.701	110.141	412.023	14.585
Ecad MO N-C	Non Clone- Clone	h8b1	9.024	161.808	103.741	297.7	14.585
Ecad MO N-C	Non Clone- Clone
Ecad MO N-C	Non Clone- Clone	h8b2	9.348	442.582	116.479	1858.71	15.111
Ecad MO N-C	Non Clone- Clone	h8b2	9.348	460.803	117.97	3310.764	15.111
Ecad MO N-C	Non Clone- Clone	h8b2	9.348	372.689	152.219	2570.19	15.111
Ecad MO N-C	Non Clone- Clone	h8b2	9.348	288.948	116.865	844.301	15.111
Ecad MO N-C	Non Clone- Clone	h8b2	9.348	257.291	122.021	850.877	15.111
Ecad MO N-C	Non Clone- Clone	h8b2	9.348	226.952	114.519	539.97	15.111
Ecad MO N-C	Non Clone- Clone	h8b2	9.348	202.814	108.835	403.236	15.111
Ecad MO N-C	Non Clone- Clone
Ecad MO N-C	Non Clone- Clone	h8b3	7.349	414.239	135.302	1031.904	11.853
Ecad MO N-C	Non Clone- Clone	h8b3	7.349	426.664	129.583	1268.202	11.853
Ecad MO N-C	Non Clone- Clone	h8b3	7.349	382.569	128.709	953.028	11.853
Ecad MO N-C	Non Clone- Clone	h8b3	7.349	336.275	121.136	1174.071	11.853
Ecad MO N-C	Non Clone- Clone	h8b3	7.349	309.763	114.859	1172.631	11.853
Ecad MO N-C	Non Clone- Clone	h8b3	7.349	286.421	117.244	1090.282	11.853
Ecad MO N-C	Non Clone- Clone	h8b3	7.349	262.901	120.724	878.654	11.853
Ecad MO N-C	Non Clone- Clone	h8b3	7.349	234.693	115.077	999.414	11.853
Ecad MO N-C	Non Clone- Clone
Ecad MO N-C	Non Clone- Clone	h8b4	7.024	444.869	175.402	1306.953	11.333
Ecad MO N-C	Non Clone- Clone	h8b4	7.024	435.008	165.531	1507.18	11.333
Ecad MO N-C	Non Clone- Clone	h8b4	7.024	417.603	154.4	1437.567	11.333
Ecad MO N-C	Non Clone- Clone	h8b4	7.024	393.724	156.581	1550.809	11.333
Ecad MO N-C	Non Clone- Clone	h8b4	7.024	370.172	152.235	1298.664	11.333
Ecad MO N-C	Non Clone- Clone	h8b4	7.024	335.471	131.318	1387.224	11.333
Ecad MO N-C	Non Clone- Clone	h8b4	7.024	303.098	121.904	1471.45	11.333
Ecad MO N-C	Non Clone- Clone	h8b4	7.024	277.47	111.83	1289.082	11.333
Ecad MO N-C	Non Clone- Clone
Ecad MO N-C	Non Clone- Clone	h8b5	8.051	396.234	177.647	935.534	13.002
Ecad MO N-C	Non Clone- Clone	h8b5	8.051	339.158	140.089	803.602	13.002
Ecad MO N-C	Non Clone- Clone	h8b5	8.051	250.896	116.919	520.668	13.002
Ecad MO N-C	Non Clone- Clone	h8b5	8.051	187.449	115.533	405.306	13.002
Ecad MO N-C	Non Clone- Clone	h8b5	8.051	165.488	101.381	391.861	13.002
Ecad MO N-C	Non Clone- Clone	h8b5	8.051	147.488	98.009	340.932	13.002
Ecad MO N-C	Non Clone- Clone
Ecad MO N-N	Non Clone- Non Clone	h1b1	11.833	551.738	139.864	2080.634	19.153
Ecad MO N-N	Non Clone- Non Clone	h1b1	11.833	610.404	133.118	3099.716	19.153
Ecad MO N-N	Non Clone- Non Clone	h1b1	11.833	643.041	134.669	3570.801	19.153
Ecad MO N-N	Non Clone- Non Clone	h1b1	11.833	665.579	151.229	4076.188	19.153
Ecad MO N-N	Non Clone- Non Clone	h1b1	11.833	608.978	142.729	3924.274	19.153
Ecad MO N-N	Non Clone- Non Clone	h1b1	11.833	513.258	130.17	2016.562	19.153
Ecad MO N-N	Non Clone- Non Clone	h1b1	11.833	446.322	130.595	1432.907	19.153
Ecad MO N-N	Non Clone- Non Clone	h1b1	11.833	360.212	141.851	1242.377	19.153
Ecad MO N-N	Non Clone- Non Clone	h1b1	11.833	282.336	129.88	842.666	19.153
Ecad MO N-N	Non Clone- Non Clone
Ecad MO N-N	Non Clone- Non Clone	h1b2	6.7	810.875	207.165	3859.743	10.806
Ecad MO N-N	Non Clone- Non Clone	h1b2	6.7	872.104	254.492	3253.643	10.806
Ecad MO N-N	Non Clone- Non Clone	h1b2	6.7	883.474	226.916	3742.528	10.806
Ecad MO N-N	Non Clone- Non Clone	h1b2	6.7	831.543	173.403	3997.746	10.806
Ecad MO N-N	Non Clone- Non Clone	h1b2	6.7	715.354	187.154	3709.431	10.806
Ecad MO N-N	Non Clone- Non Clone	h1b2	6.7	599.539	190.202	2387.582	10.806
Ecad MO N-N	Non Clone- Non Clone	h1b2	6.7	439.066	171.996	1900.578	10.806
Ecad MO N-N	Non Clone- Non Clone	h1b2	6.7	314.852	153.18	1230.139	10.806
Ecad MO N-N	Non Clone- Non Clone	h1b2	6.7	228.174	124.42	507.711	10.806
Ecad MO N-N	Non Clone- Non Clone
Ecad MO N-N	Non Clone- Non Clone	h1b3	8.645	544.96	128.492	1515.355	13.969
Ecad MO N-N	Non Clone- Non Clone	h1b3	8.645	549.623	115.572	2050.246	13.969
Ecad MO N-N	Non Clone- Non Clone	h1b3	8.645	540.711	122.856	2517.838	13.969
Ecad MO N-N	Non Clone- Non Clone	h1b3	8.645	528.744	120.198	1930.044	13.969
Ecad MO N-N	Non Clone- Non Clone	h1b3	8.916	513.573	120.054	1708.033	14.409
Ecad MO N-N	Non Clone- Non Clone	h1b3	8.916	423.758	100.74	1155.313	14.409
Ecad MO N-N	Non Clone- Non Clone	h1b3	8.916	367.102	119.946	899.146	14.409
Ecad MO N-N	Non Clone- Non Clone	h1b3	8.916	303.21	110.942	610.987	14.409
Ecad MO N-N	Non Clone- Non Clone	h1b3	8.916	245.43	126.371	607.406	14.409
Ecad MO N-N	Non Clone- Non Clone	h1b3	8.916	205.353	109.493	684.058	14.409
Ecad MO N-N	Non Clone- Non Clone
Ecad MO N-N	Non Clone- Non Clone	h1b4	7.727	738.914	164.593	3074.27	12.476
Ecad MO N-N	Non Clone- Non Clone	h1b4	7.727	652.971	183.566	2378.738	12.476
Ecad MO N-N	Non Clone- Non Clone	h1b4	7.727	616.347	175.011	2707.256	12.476
Ecad MO N-N	Non Clone- Non Clone	h1b4	7.727	583.427	173.242	2061.336	12.476
Ecad MO N-N	Non Clone- Non Clone	h1b4	7.727	532.989	199.215	1643.453	12.476
Ecad MO N-N	Non Clone- Non Clone	h1b4	7.727	501.658	188.741	1777.597	12.476
Ecad MO N-N	Non Clone- Non Clone	h1b4	7.727	479.738	192.028	1893.606	12.476
Ecad MO N-N	Non Clone- Non Clone	h1b4	7.727	429.51	167.211	1826.319	12.476
Ecad MO N-N	Non Clone- Non Clone	h1b4	7.727	352.309	134.293	1019.849	12.476
Ecad MO N-N	Non Clone- Non Clone	h1b4	7.727	274.101	120.638	933.151	12.476
Ecad MO N-N	Non Clone- Non Clone
Ecad MO N-N	Non Clone- Non Clone	h1b5	7.565	679.407	179.615	2865.585	12.212
Ecad MO N-N	Non Clone- Non Clone	h1b5	7.565	648.84	210.511	1580.499	12.212
Ecad MO N-N	Non Clone- Non Clone	h1b5	7.565	478.696	184.267	1091.202	12.212
Ecad MO N-N	Non Clone- Non Clone	h1b5	7.565	332.962	160.342	593.291	12.212
Ecad MO N-N	Non Clone- Non Clone	h1b5	7.565	281.223	160.905	548.005	12.212
Ecad MO N-N	Non Clone- Non Clone	h1b5	7.565	231.548	136.389	467.152	12.212
Ecad MO N-N	Non Clone- Non Clone	h1b5	7.565	202.429	111.218	460.662	12.212
Ecad MO N-N	Non Clone- Non Clone
Ecad MO N-N	Non Clone- Non Clone	h1b6	9.456	637.74	125.537	3082.27	15.287
Ecad MO N-N	Non Clone- Non Clone	h1b6	9.456	630.608	114.439	3307.802	15.287
Ecad MO N-N	Non Clone- Non Clone	h1b6	9.456	573.007	128.693	2820.981	15.287
Ecad MO N-N	Non Clone- Non Clone	h1b6	8.321	579.542	125.666	4026.707	13.442
Ecad MO N-N	Non Clone- Non Clone	h1b6	8.321	503.453	120.634	1584.624	13.442
Ecad MO N-N	Non Clone- Non Clone	h1b6	8.321	439.718	119.822	1403.3	13.442
Ecad MO N-N	Non Clone- Non Clone	h1b6	8.321	350.505	110.246	1023.088	13.442
Ecad MO N-N	Non Clone- Non Clone	h1b6	8.321	287.348	105.835	1039.282	13.442
Ecad MO N-N	Non Clone- Non Clone	h1b6	8.321	232.956	113.956	1131.313	13.442
Ecad MO N-N	Non Clone- Non Clone	h1b6	8.321	195.913	113.761	769.271	13.442
Ecad MO N-N	Non Clone- Non Clone
Ecad MO N-N	Non Clone- Non Clone	h1b7	9.78	561.071	108.318	3511.239	15.815
Ecad MO N-N	Non Clone- Non Clone	h1b7	9.78	581.746	103.542	4093.957	15.815
Ecad MO N-N	Non Clone- Non Clone	h1b7	9.78	528.938	129.823	3992.359	15.815
Ecad MO N-N	Non Clone- Non Clone	h1b7	9.78	439.524	128.969	1725.215	15.815
Ecad MO N-N	Non Clone- Non Clone	h1b7	9.348	649.918	165.696	2084.527	15.111
Ecad MO N-N	Non Clone- Non Clone	h1b7	9.348	511.629	201.574	1629.214	15.111
Ecad MO N-N	Non Clone- Non Clone	h1b7	9.348	370.847	157.051	703.051	15.111
Ecad MO N-N	Non Clone- Non Clone	h1b7	9.348	267.043	115.249	574.365	15.111
Ecad MO N-N	Non Clone- Non Clone
Ecad MO N-N	Non Clone- Non Clone	h1b8	9.348	556.694	141.338	1544.474	15.112
Ecad MO N-N	Non Clone- Non Clone	h1b8	9.348	525.621	145.496	1802.063	15.112
Ecad MO N-N	Non Clone- Non Clone	h1b8	9.348	468.795	162.765	2337.698	15.112
Ecad MO N-N	Non Clone- Non Clone	h1b8	9.348	412.471	155.037	2022.848	15.112
Ecad MO N-N	Non Clone- Non Clone	h1b8	9.348	347.505	148.406	1490.718	15.112
Ecad MO N-N	Non Clone- Non Clone	h1b8	9.348	266.704	115.72	760.989	15.112
Ecad MO N-N	Non Clone- Non Clone	h1b8	9.348	202.91	111.829	439.061	15.112
Ecad MO N-N	Non Clone- Non Clone	h2b1	11.077	419.217	167.241	1341.745	17.923
Ecad MO N-N	Non Clone- Non Clone	h2b1	11.077	373.663	153.103	2098.094	17.923
Ecad MO N-N	Non Clone- Non Clone	h2b1	11.077	320.922	135.174	1163.942	17.923
Ecad MO N-N	Non Clone- Non Clone	h2b1	11.077	256.606	119.143	1183.214	17.923
Ecad MO N-N	Non Clone- Non Clone	h2b1	11.077	215.595	114.287	1354.409	17.923
Ecad MO N-N	Non Clone- Non Clone	h2b1	11.077	195.002	106.823	628.845	17.923
Ecad MO N-N	Non Clone- Non Clone
Ecad MO N-N	Non Clone- Non Clone	h2b2	12.212	469.677	144.775	4095	19.768
Ecad MO N-N	Non Clone- Non Clone	h2b2	12.212	372.303	108.76	1083.544	19.768
Ecad MO N-N	Non Clone- Non Clone	h2b2	12.212	305.807	145.787	912.796	19.768
Ecad MO N-N	Non Clone- Non Clone	h2b2	12.212	246.111	124.875	568.408	19.768
Ecad MO N-N	Non Clone- Non Clone	h2b2	12.212	218.224	110.643	454.613	19.768
Ecad MO N-N	Non Clone- Non Clone	h2b2	12.212	209.93	103.75	959.562	19.768
Ecad MO N-N	Non Clone- Non Clone
Ecad MO N-N	Non Clone- Non Clone	h2b3	8.808	411.392	165.771	2088.165	14.233
Ecad MO N-N	Non Clone- Non Clone	h2b3	8.808	448.948	176.341	3002.576	14.233
Ecad MO N-N	Non Clone- Non Clone	h2b3	8.808	392.972	152.132	1675.733	14.233
Ecad MO N-N	Non Clone- Non Clone	h2b3	8.808	323.834	141.657	819.271	14.233
Ecad MO N-N	Non Clone- Non Clone	h2b3	8.808	264.965	121.787	678.433	14.233
Ecad MO N-N	Non Clone- Non Clone	h2b3	8.808	241.148	131.305	667.79	14.233
Ecad MO N-N	Non Clone- Non Clone
Ecad MO N-N	Non Clone- Non Clone	h2b4	7.781	566.265	125.854	1777.045	12.564
Ecad MO N-N	Non Clone- Non Clone	h2b4	7.781	406.882	151.293	1222.557	12.564
Ecad MO N-N	Non Clone- Non Clone	h2b4	7.781	313.767	125.771	768.205	12.564
Ecad MO N-N	Non Clone- Non Clone	h2b4	7.781	243.897	126.087	585.818	12.564
Ecad MO N-N	Non Clone- Non Clone	h2b4	7.781	197.088	99.929	478.062	12.564
Ecad MO N-N	Non Clone- Non Clone	h2b4	7.781	181.259	103.696	511.296	12.564
Ecad MO N-N	Non Clone- Non Clone
Ecad MO N-N	Non Clone- Non Clone	h2b5	6.754	648.594	186.34	3282.718	10.894
Ecad MO N-N	Non Clone- Non Clone	h2b5	6.754	642.624	183.146	3503.504	10.894
Ecad MO N-N	Non Clone- Non Clone	h2b5	6.754	517.831	182.046	1795.886	10.894
Ecad MO N-N	Non Clone- Non Clone	h2b5	6.754	394.074	154.857	1893.511	10.894
Ecad MO N-N	Non Clone- Non Clone	h2b5	6.754	272.093	130.74	1569.635	10.894
Ecad MO N-N	Non Clone- Non Clone	h2b5	6.754	213.919	114.62	627.867	10.894
Ecad MO N-N	Non Clone- Non Clone	h2b5	6.754	169.317	99.888	421.936	10.894
Ecad MO N-N	Non Clone- Non Clone
Ecad MO N-N	Non Clone- Non Clone	h2b6	12.32	560.213	166.548	2212.979	19.944
Ecad MO N-N	Non Clone- Non Clone	h2b6	12.32	520.062	141.906	2627.194	19.944
Ecad MO N-N	Non Clone- Non Clone	h2b6	12.32	387.389	145.468	1978.43	19.944
Ecad MO N-N	Non Clone- Non Clone	h2b6	12.32	282.337	126.568	798.934	19.944
Ecad MO N-N	Non Clone- Non Clone	h2b6	12.32	204.438	105.748	492.74	19.944
Ecad MO N-N	Non Clone- Non Clone	h2b6	12.32	159.587	107.583	370.158	19.944
Ecad MO N-N	Non Clone- Non Clone	h2b6	12.32	140.421	100.993	263.59	19.944
Ecad MO N-N	Non Clone- Non Clone
Ecad MO N-N	Non Clone- Non Clone	h2b7	6.268	657.648	178.709	2693.834	10.104
Ecad MO N-N	Non Clone- Non Clone	h2b7	6.268	591.17	190.368	2523.742	10.104
Ecad MO N-N	Non Clone- Non Clone	h2b7	6.268	428.666	173.588	1121.863	10.104
Ecad MO N-N	Non Clone- Non Clone	h2b7	6.268	320.546	141.707	1036.89	10.104
Ecad MO N-N	Non Clone- Non Clone	h2b7	6.268	233.593	119.041	493.623	10.104
Ecad MO N-N	Non Clone- Non Clone	h3b1	10.212	450.149	147.149	1885.274	16.517
Ecad MO N-N	Non Clone- Non Clone	h3b1	10.212	421.308	141.992	1152.227	16.517
Ecad MO N-N	Non Clone- Non Clone	h3b1	10.212	366.551	130.513	1734.857	16.517
Ecad MO N-N	Non Clone- Non Clone	h3b1	10.212	302.743	114.986	2105.933	16.517
Ecad MO N-N	Non Clone- Non Clone	h3b1	10.212	262.391	116.065	1649.034	16.517
Ecad MO N-N	Non Clone- Non Clone
Ecad MO N-N	Non Clone- Non Clone	h3b2	10.429	432.653	126.222	3281.817	16.869
Ecad MO N-N	Non Clone- Non Clone	h3b2	10.429	357.05	133.856	2508.394	16.869
Ecad MO N-N	Non Clone- Non Clone	h3b2	10.429	272.519	127.296	770.408	16.869
Ecad MO N-N	Non Clone- Non Clone	h3b2	10.429	221.371	117.447	594.071	16.869
Ecad MO N-N	Non Clone- Non Clone	h3b2	10.429	196.669	116.382	660.898	16.869
Ecad MO N-N	Non Clone- Non Clone	h3b2	10.429	178.162	112.068	522.64	16.869
Ecad MO N-N	Non Clone- Non Clone
Ecad MO N-N	Non Clone- Non Clone	h3b3	8.321	441.43	122.779	3239.249	13.442
Ecad MO N-N	Non Clone- Non Clone	h3b3	8.321	380.656	111.401	1879.746	13.442
Ecad MO N-N	Non Clone- Non Clone	h3b3	8.321	299.218	111.586	1017.504	13.442
Ecad MO N-N	Non Clone- Non Clone	h3b3	8.321	233.031	110.032	654.671	13.442
Ecad MO N-N	Non Clone- Non Clone	h3b3	8.321	201.826	108.4	493.753	13.442
Ecad MO N-N	Non Clone- Non Clone	h3b3	8.321	175.669	101.364	469.651	13.442
Ecad MO N-N	Non Clone- Non Clone
Ecad MO N-N	Non Clone- Non Clone	h3b4	10.537	326.044	132.338	2135.802	17.045
Ecad MO N-N	Non Clone- Non Clone	h3b4	10.537	315.822	131.573	3245.701	17.045
Ecad MO N-N	Non Clone- Non Clone	h3b4	10.537	290.36	123.7	3428.763	17.045
Ecad MO N-N	Non Clone- Non Clone	h3b4	10.537	249.631	114.662	1622.816	17.045
Ecad MO N-N	Non Clone- Non Clone	h3b4	10.537	224.358	112.268	715.04	17.045
Ecad MO N-N	Non Clone- Non Clone	h4b1	6.754	753.62	246.811	2104.823	10.894
Ecad MO N-N	Non Clone- Non Clone	h4b1	6.754	667.136	223.672	3449.164	10.894
Ecad MO N-N	Non Clone- Non Clone	h4b1	6.754	505.673	165.896	3261.317	10.894
Ecad MO N-N	Non Clone- Non Clone	h4b1	7.241	518.152	157.172	1252.585	11.685
Ecad MO N-N	Non Clone- Non Clone	h4b1	7.241	487.781	131.85	1303.845	11.685
Ecad MO N-N	Non Clone- Non Clone	h4b1	7.241	401.613	127.087	1721.201	11.685
Ecad MO N-N	Non Clone- Non Clone	h4b1	7.241	320.326	127.054	2850.797	11.685
Ecad MO N-N	Non Clone- Non Clone
Ecad MO N-N	Non Clone- Non Clone	h4b2	7.403	758.18	188.58	3796.323	11.949
Ecad MO N-N	Non Clone- Non Clone	h4b2	7.403	698.309	187.271	2972.392	11.949
Ecad MO N-N	Non Clone- Non Clone	h4b2	7.403	571.662	210.16	2057.626	11.949
Ecad MO N-N	Non Clone- Non Clone	h4b2	7.403	452.83	183.96	3372.901	11.949
Ecad MO N-N	Non Clone- Non Clone	h4b2	7.403	348.446	165.849	3927.246	11.949
Ecad MO N-N	Non Clone- Non Clone	h4b2	7.403	274.533	137.847	2269.845	11.949
Ecad MO N-N	Non Clone- Non Clone
Ecad MO N-N	Non Clone- Non Clone	h4b3	6.7	942.212	202.707	3788.207	10.807
Ecad MO N-N	Non Clone- Non Clone	h4b3	6.7	962.102	280.308	2772.197	10.807
Ecad MO N-N	Non Clone- Non Clone	h4b3	6.7	871.662	343.277	1923.781	10.807
Ecad MO N-N	Non Clone- Non Clone	h4b3	6.7	695.189	261.915	1719.227	10.807
Ecad MO N-N	Non Clone- Non Clone	h4b3	6.7	560.344	237.451	1618.426	10.807
Ecad MO N-N	Non Clone- Non Clone	h4b3	6.7	458.896	201.105	1326.265	10.807
Ecad MO N-N	Non Clone- Non Clone	h4b3	6.7	380.554	169.769	970.809	10.807
Ecad MO N-N	Non Clone- Non Clone
Ecad MO N-N	Non Clone- Non Clone	h4b4	8.754	730.825	263.714	2378.907	14.145
Ecad MO N-N	Non Clone- Non Clone	h4b4	8.754	617.623	213.063	2631.575	14.145
Ecad MO N-N	Non Clone- Non Clone	h4b4	8.754	539.762	201.022	2144.201	14.145
Ecad MO N-N	Non Clone- Non Clone	h4b4	8.754	423.973	165.494	1662.127	14.145
Ecad MO N-N	Non Clone- Non Clone	h4b4	8.754	338.305	149.531	1441.907	14.145
Ecad MO N-N	Non Clone- Non Clone	h4b4	8.754	287.882	125.4	1175.826	14.145
Ecad MO N-N	Non Clone- Non Clone	h4b4	8.754	263.467	118.876	1299.146	14.145
Ecad MO N-N	Non Clone- Non Clone
Ecad MO N-N	Non Clone- Non Clone	h4b5	6.916	908.187	269.624	2631.941	11.158
Ecad MO N-N	Non Clone- Non Clone	h4b5	6.916	906.752	236.092	2555.866	11.158
Ecad MO N-N	Non Clone- Non Clone	h4b5	6.916	853.835	272.315	2649.42	11.158
Ecad MO N-N	Non Clone- Non Clone	h4b5	6.916	785.896	216.437	2632.755	11.158
Ecad MO N-N	Non Clone- Non Clone	h4b5	6.916	599.089	227.85	2140.955	11.158
Ecad MO N-N	Non Clone- Non Clone	h4b5	6.916	408.338	172.049	1356.609	11.158
Ecad MO N-N	Non Clone- Non Clone	h4b5	6.916	303.019	138.168	812.507	11.158
Ecad MO N-N	Non Clone- Non Clone
Ecad MO N-N	Non Clone- Non Clone	h4b6	7.619	894.377	210.924	3411.675	12.289
Ecad MO N-N	Non Clone- Non Clone	h4b6	7.619	830.055	268.45	2361.006	12.289
Ecad MO N-N	Non Clone- Non Clone	h4b6	7.619	671.315	188.674	2341.682	12.289
Ecad MO N-N	Non Clone- Non Clone	h4b6	7.619	504.409	154.164	1458.456	12.289
Ecad MO N-N	Non Clone- Non Clone	h4b6	7.619	368.106	118.841	956.283	12.289
Ecad MO N-N	Non Clone- Non Clone	h4b6	7.619	253.212	112.69	696.756	12.289
Ecad MO N-N	Non Clone- Non Clone
Ecad MO N-N	Non Clone- Non Clone	h4b7	8.375	746.903	286.439	3114.866	13.53
Ecad MO N-N	Non Clone- Non Clone	h4b7	8.375	713.706	226.577	2824.269	13.53
Ecad MO N-N	Non Clone- Non Clone	h4b7	8.375	610.291	257.533	2188.131	13.53
Ecad MO N-N	Non Clone- Non Clone	h4b7	8.375	505.607	216.682	1550.106	13.53
Ecad MO N-N	Non Clone- Non Clone	h4b7	8.375	393.311	153.194	1079.112	13.53
Ecad MO N-N	Non Clone- Non Clone	h4b7	8.375	310.456	139.12	976.226	13.53
Ecad MO N-N	Non Clone- Non Clone
Ecad MO N-N	Non Clone- Non Clone	h4b8	8.754	789.266	219.198	3910.999	14.145
Ecad MO N-N	Non Clone- Non Clone	h4b8	8.754	787.794	227.163	3903.212	14.145
Ecad MO N-N	Non Clone- Non Clone	h4b8	8.754	740.495	213	3600.76	14.145
Ecad MO N-N	Non Clone- Non Clone	h4b8	8.754	644.545	196.707	2121.5	14.145
Ecad MO N-N	Non Clone- Non Clone	h4b8	8.754	546.359	180.174	1585.49	14.145
Ecad MO N-N	Non Clone- Non Clone	h4b8	8.754	487.667	146.655	1178.79	14.145
Ecad MO N-N	Non Clone- Non Clone
Ecad MO N-N	Non Clone- Non Clone	h4b9	6.916	543.385	163.175	1645.431	11.158
Ecad MO N-N	Non Clone- Non Clone	h4b9	6.916	560.75	162.04	1865.098	11.158
Ecad MO N-N	Non Clone- Non Clone	h4b9	6.916	495.365	176.851	1240.309	11.158
Ecad MO N-N	Non Clone- Non Clone	h4b9	6.916	431.987	162.577	1016.773	11.158
Ecad MO N-N	Non Clone- Non Clone	h4b9	6.916	381.455	162.233	961.761	11.158
Ecad MO N-N	Non Clone- Non Clone	h4b9	6.916	340.334	128.35	1003.271	11.158
Ecad MO N-N	Non Clone- Non Clone	h4b9	6.916	276.645	139.426	918.124	11.158
Ecad MO N-N	Non Clone- Non Clone
Ecad MO N-N	Non Clone- Non Clone	h4b10	10.861	696.235	150.754	2960.886	17.572
Ecad MO N-N	Non Clone- Non Clone	h4b10	10.861	739.895	163.949	3587.003	17.572
Ecad MO N-N	Non Clone- Non Clone	h4b10	10.861	727.674	193.176	3425.184	17.572
Ecad MO N-N	Non Clone- Non Clone	h4b10	10.861	640.363	165.681	3242.106	17.572
Ecad MO N-N	Non Clone- Non Clone	h4b10	10.861	503.634	168.694	3122.043	17.572
Ecad MO N-N	Non Clone- Non Clone	h4b10	10.861	405.836	142.193	1877.038	17.572
Ecad MO N-N	Non Clone- Non Clone	h4b10	10.861	346.496	133.24	2302.093	17.572
Ecad MO N-N	Non Clone- Non Clone
Ecad MO N-N	Non Clone- Non Clone	h4b11	7.078	915.616	211.534	3687.435	11.422
Ecad MO N-N	Non Clone- Non Clone	h4b11	7.078	801.647	221.113	2245.762	11.422
Ecad MO N-N	Non Clone- Non Clone	h4b11	7.078	674.137	205.038	1946.218	11.422
Ecad MO N-N	Non Clone- Non Clone	h4b11	7.078	496.256	168.864	1564.316	11.422
Ecad MO N-N	Non Clone- Non Clone	h4b11	7.078	330.811	140.596	785.248	11.422
Ecad MO N-N	Non Clone- Non Clone	h4b11	7.078	247.039	133.761	449.693	11.422
Ecad MO N-N	Non Clone- Non Clone	h5b13	6.322	814.83	238.385	2623.368	10.192
Ecad MO N-N	Non Clone- Non Clone	h5b13	6.322	755.78	280.981	2005.899	10.192
Ecad MO N-N	Non Clone- Non Clone	h5b13	6.322	597.561	181.706	1573.301	10.192
Ecad MO N-N	Non Clone- Non Clone	h5b13	6.322	419.526	146.994	990.698	10.192
Ecad MO N-N	Non Clone- Non Clone	h5b13	6.322	313.4	125.218	838.75	10.192
[truncated: 215 more rows]
