# Supplementary material for: Stepwise polarisation of developing bilayered epidermis is mediated by aPKC and E-cadherin in zebrafish
Source: eLife. 2020 Jan 22;9:e49064. doi: 10.7554/eLife.49064 (PMC6975926; doi:10.7554/eLife.49064)
Supplement: Figure 4—figure supplement 2—source data 5. [file elife-49064-fig4-figsupp2-data5.csv]

Genotype	Boundary	Cell name	Area	Mean	Min	Max	Length
Ctrl MO C-C	Clone-Clone	h1b1	9.402	296.14	24.162	986.416	15.2
Ctrl MO C-C	Clone-Clone	h1b1	9.402	394.243	79.145	1961.483	15.2
Ctrl MO C-C	Clone-Clone	h1b1	9.402	571.073	83.102	1743.762	15.2
Ctrl MO C-C	Clone-Clone	h1b1	9.402	709.073	90.341	3710.522	15.2
Ctrl MO C-C	Clone-Clone	h1b1	9.402	731.598	149.045	3700.387	15.2
Ctrl MO C-C	Clone-Clone	h1b1	9.402	699.522	100.223	3236.162	15.2
Ctrl MO C-C	Clone-Clone	h1b2	5.349	225.704	28.175	549.767	8.61
Ctrl MO C-C	Clone-Clone	h1b2	5.349	363.741	80.382	967.481	8.61
Ctrl MO C-C	Clone-Clone	h1b2	5.349	534.08	145.093	1233.188	8.61
Ctrl MO C-C	Clone-Clone	h1b2	5.349	555.65	162.823	1476.152	8.61
Ctrl MO C-C	Clone-Clone	h1b3	8.645	208.598	9.35	620.869	13.969
Ctrl MO C-C	Clone-Clone	h1b3	8.645	344.455	20.744	1290.743	13.969
Ctrl MO C-C	Clone-Clone	h1b3	8.645	429.573	112.043	2116.416	13.969
Ctrl MO C-C	Clone-Clone	h1b3	9.24	593.472	79.103	2205.673	14.935
Ctrl MO C-C	Clone-Clone	h1b3	9.24	551.512	82.107	2637.188	14.935
Ctrl MO C-C	Clone-Clone	h1b3	9.24	447.239	71.443	1362.213	14.935
Ctrl MO C-C	Clone-Clone	h1b4	12.914	190.889	18.532	762.416	20.91
Ctrl MO C-C	Clone-Clone	h1b4	12.914	290.486	16.329	1965.002	20.91
Ctrl MO C-C	Clone-Clone	h1b4	12.914	309.035	30.47	1855	20.91
Ctrl MO C-C	Clone-Clone	h1b4	12.32	582.192	87.656	2581.817	19.944
Ctrl MO C-C	Clone-Clone	h1b4	12.32	622.802	109.42	2035.901	19.944
Ctrl MO C-C	Clone-Clone	h1b4	12.32	506.886	111.788	1647.759	19.944
Ctrl MO C-C	Clone-Clone	h1b5	5.836	255.064	48.064	816.052	9.401
Ctrl MO C-C	Clone-Clone	h1b5	5.836	508.722	105.979	1949.795	9.401
Ctrl MO C-C	Clone-Clone	h1b5	5.836	670.49	116.239	2087.754	9.401
Ctrl MO C-C	Clone-Clone	h1b5	5.836	703.663	122.503	2358.074	9.401
Ctrl MO C-C	Clone-Clone	h1b5	5.836	666.468	118.616	1604.144	9.401
Ctrl MO C-C	Clone-Clone	h1b6	11.617	159.837	14.357	627.664	18.802
Ctrl MO C-C	Clone-Clone	h1b6	11.617	297.511	44.275	1521.179	18.802
Ctrl MO C-C	Clone-Clone	h1b6	11.617	400.27	69.966	1479.8	18.802
Ctrl MO C-C	Clone-Clone	h1b6	11.617	493.217	71.753	1429.608	18.802
Ctrl MO C-C	Clone-Clone	h1b6	11.617	579.458	127.712	2301.626	18.802
Ctrl MO C-C	Clone-Clone	h1b6	11.617	505.028	71	2729.39	18.802
Ctrl MO C-C	Clone-Clone	h1b6	11.617	321.356	46.311	1489.684	18.802
Ctrl MO C-C	Clone-Clone	h1b7	11.293	326.848	50.043	968.293	18.275
Ctrl MO C-C	Clone-Clone	h1b7	11.293	454.774	52.862	1782.443	18.275
Ctrl MO C-C	Clone-Clone	h1b7	11.293	533.447	88.063	1843.955	18.275
Ctrl MO C-C	Clone-Clone	h1b7	11.293	518.454	123.269	1741.62	18.275
Ctrl MO C-C	Clone-Clone	h1b7	11.293	474.018	105.313	2810.223	18.275
Ctrl MO C-C	Clone-Clone	h1b8	6.916	263	1.935	943.242	11.158
Ctrl MO C-C	Clone-Clone	h1b8	6.916	309.226	29.34	1803.902	11.158
Ctrl MO C-C	Clone-Clone	h1b8	6.916	366.737	31.124	1969.831	11.158
Ctrl MO C-C	Clone-Clone	h1b8	6.916	347.105	34.921	1711.932	11.158
Ctrl MO C-C	Clone-Clone	h1b8	6.916	268.492	33.241	1301.055	11.158
Ctrl MO N-C	Non Clone- Clone	h1b1	10.104	154.22	8.016	569.239	16.342
Ctrl MO N-C	Non Clone- Clone	h1b1	10.104	175.792	6.346	1493.005	16.342
Ctrl MO N-C	Non Clone- Clone	h1b1	10.104	185.26	5.557	1279.655	16.342
Ctrl MO N-C	Non Clone- Clone	h1b1	9.186	381.465	63.669	957.685	14.848
Ctrl MO N-C	Non Clone- Clone	h1b1	9.186	354.821	56.104	1275.622	14.848
Ctrl MO N-C	Non Clone- Clone	h1b1	9.186	321.463	83.743	1274.268	14.848
Ctrl MO N-C	Non Clone- Clone	h1b10	8.862	280.574	23.192	1055.778	14.321
Ctrl MO N-C	Non Clone- Clone	h1b10	8.862	413.222	73.164	1897.35	14.321
Ctrl MO N-C	Non Clone- Clone	h1b10	8.862	540.019	101.929	2985.551	14.321
Ctrl MO N-C	Non Clone- Clone	h1b10	8.862	482.649	110.384	1750.648	14.321
Ctrl MO N-C	Non Clone- Clone	h1b10	8.862	407.444	135.198	1338.826	14.321
Ctrl MO N-C	Non Clone- Clone	h1b10	8.862	277.593	69.651	843.532	14.321
Ctrl MO N-C	Non Clone- Clone	h1b11	7.997	184.722	10.965	621.935	12.915
Ctrl MO N-C	Non Clone- Clone	h1b11	7.997	340.888	68.722	1499.657	12.915
Ctrl MO N-C	Non Clone- Clone	h1b11	7.997	516.808	134.858	1754.487	12.915
Ctrl MO N-C	Non Clone- Clone	h1b11	7.997	541.687	84.322	1792.297	12.915
Ctrl MO N-C	Non Clone- Clone	h1b11	7.997	540.397	120.454	1991.931	12.915
Ctrl MO N-C	Non Clone- Clone	h1b11	7.997	460.209	47.745	2497.178	12.915
Ctrl MO N-C	Non Clone- Clone	h1b12	11.888	194.165	12.15	635.757	19.241
Ctrl MO N-C	Non Clone- Clone	h1b12	11.888	353.424	40.022	1358.638	19.241
Ctrl MO N-C	Non Clone- Clone	h1b12	11.888	446.722	74.842	1972.46	19.241
Ctrl MO N-C	Non Clone- Clone	h1b12	11.833	569.754	123.226	1924.034	19.153
Ctrl MO N-C	Non Clone- Clone	h1b12	11.833	460.61	84.832	1462.217	19.153
Ctrl MO N-C	Non Clone- Clone	h1b13	13.238	157.629	12.948	574.123	21.438
Ctrl MO N-C	Non Clone- Clone	h1b13	13.238	294.883	22.833	1037.859	21.438
Ctrl MO N-C	Non Clone- Clone	h1b13	13.238	478.372	49.351	1975.948	21.438
Ctrl MO N-C	Non Clone- Clone	h1b13	13.238	471.788	71.776	2284.591	21.438
Ctrl MO N-C	Non Clone- Clone	h1b13	13.238	383.276	37.954	1621.955	21.438
Ctrl MO N-C	Non Clone- Clone	h1b13	13.238	272.328	32.548	1270.921	21.438
Ctrl MO N-C	Non Clone- Clone	h1b14	5.457	115.727	10.651	350.99	8.786
Ctrl MO N-C	Non Clone- Clone	h1b14	5.457	266.029	9.164	828.523	8.786
Ctrl MO N-C	Non Clone- Clone	h1b14	5.457	416.672	64.552	1159.227	8.786
Ctrl MO N-C	Non Clone- Clone	h1b14	5.457	486.424	138.126	1393.193	8.786
Ctrl MO N-C	Non Clone- Clone	h1b14	5.457	555.953	123.688	1458.557	8.786
Ctrl MO N-C	Non Clone- Clone	h1b14	5.457	669.208	190.79	1482.865	8.786
Ctrl MO N-C	Non Clone- Clone	h1b14	5.457	685.217	163.456	3028.698	8.786
Ctrl MO N-C	Non Clone- Clone	h1b15	10.915	83.372	1.407	361.562	17.66
Ctrl MO N-C	Non Clone- Clone	h1b15	10.915	215.58	27.104	656.691	17.66
Ctrl MO N-C	Non Clone- Clone	h1b15	10.915	364.838	26.617	1321.41	17.66
Ctrl MO N-C	Non Clone- Clone	h1b15	10.915	444.106	97.454	1600.873	17.66
Ctrl MO N-C	Non Clone- Clone	h1b15	10.915	524.762	120.568	1872.857	17.66
Ctrl MO N-C	Non Clone- Clone	h1b15	10.915	616.275	132.367	2905.298	17.66
Ctrl MO N-C	Non Clone- Clone	h1b15	10.915	632.7	73.413	4074.287	17.66
Ctrl MO N-C	Non Clone- Clone	h1b16	8.808	171.94	12.462	434.419	14.233
Ctrl MO N-C	Non Clone- Clone	h1b16	8.808	363.025	21.53	1418.796	14.233
Ctrl MO N-C	Non Clone- Clone	h1b16	8.808	431.637	36.998	1710.943	14.233
Ctrl MO N-C	Non Clone- Clone	h1b16	8.808	499.188	52.331	1794.856	14.233
Ctrl MO N-C	Non Clone- Clone	h1b16	8.808	583.263	46.924	1715.737	14.233
Ctrl MO N-C	Non Clone- Clone	h1b16	8.808	638.478	74.754	2732.847	14.233
Ctrl MO N-C	Non Clone- Clone	h1b16	8.808	575.3	120.445	1913.724	14.233
Ctrl MO N-C	Non Clone- Clone	h1b16	8.808	481.515	114.295	1601.128	14.233
Ctrl MO N-C	Non Clone- Clone	h1b17	13.4	137.959	15.483	502.203	21.692
Ctrl MO N-C	Non Clone- Clone	h1b17	13.4	330.617	39.049	895.843	21.692
Ctrl MO N-C	Non Clone- Clone	h1b17	13.4	362.14	27.124	1961.42	21.692
Ctrl MO N-C	Non Clone- Clone	h1b17	13.4	368.692	35.455	2639.173	21.692
Ctrl MO N-C	Non Clone- Clone	h1b17	13.4	384.636	41.249	2842.624	21.692
Ctrl MO N-C	Non Clone- Clone	h1b17	13.13	629.499	63.833	3851.871	21.235
Ctrl MO N-C	Non Clone- Clone	h1b17	13.13	577.288	53.719	2796.823	21.235
Ctrl MO N-C	Non Clone- Clone	h1b17	13.13	500.652	54.497	3018.511	21.235
Ctrl MO N-C	Non Clone- Clone	h1b18	6.484	132.886	6.247	414.76	10.455
Ctrl MO N-C	Non Clone- Clone	h1b18	6.484	345.98	54.807	1160.133	10.455
Ctrl MO N-C	Non Clone- Clone	h1b18	6.484	380.462	46.854	1365.389	10.455
Ctrl MO N-C	Non Clone- Clone	h1b18	6.484	378.437	54.106	1119.758	10.455
Ctrl MO N-C	Non Clone- Clone	h1b18	6.484	370.93	63.115	961.606	10.455
Ctrl MO N-C	Non Clone- Clone	h1b18	6.484	384.277	44.312	1420.046	10.455
Ctrl MO N-C	Non Clone- Clone	h1b19	10.321	98.341	0.299	330.373	16.693
Ctrl MO N-C	Non Clone- Clone	h1b19	10.321	231.729	31.839	1340.972	16.693
Ctrl MO N-C	Non Clone- Clone	h1b19	10.321	350.741	39.406	1651.14	16.693
Ctrl MO N-C	Non Clone- Clone	h1b19	10.321	405.301	79.752	1692.926	16.693
Ctrl MO N-C	Non Clone- Clone	h1b19	10.321	390.794	119.118	1339.819	16.693
Ctrl MO N-C	Non Clone- Clone	h1b2	8.862	335.21	46.848	1340.829	14.321
Ctrl MO N-C	Non Clone- Clone	h1b2	8.862	399.629	97.593	1614.245	14.321
Ctrl MO N-C	Non Clone- Clone	h1b2	8.862	492.849	80.65	1616.233	14.321
Ctrl MO N-C	Non Clone- Clone	h1b2	8.862	465.084	84.526	1985.414	14.321
Ctrl MO N-C	Non Clone- Clone	h1b2	8.862	416.79	69.685	1429.142	14.321
Ctrl MO N-C	Non Clone- Clone	h1b2	8.862	313.464	41.573	936.364	14.321
Ctrl MO N-C	Non Clone- Clone	h1b20	4.377	191.086	19.327	465.273	7.029
Ctrl MO N-C	Non Clone- Clone	h1b20	4.377	375.261	67.047	1226.081	7.029
Ctrl MO N-C	Non Clone- Clone	h1b20	4.377	551.424	78.385	1467.963	7.029
Ctrl MO N-C	Non Clone- Clone	h1b20	4.377	550.745	123.855	1791.111	7.029
Ctrl MO N-C	Non Clone- Clone	h1b20	4.377	446.608	103.407	2514.779	7.029
Ctrl MO N-C	Non Clone- Clone	h1b21	8.916	214.23	19.467	569.223	14.409
Ctrl MO N-C	Non Clone- Clone	h1b21	8.916	317.714	36.547	1431.296	14.409
Ctrl MO N-C	Non Clone- Clone	h1b21	8.916	510.096	86.914	1401.851	14.409
Ctrl MO N-C	Non Clone- Clone	h1b21	8.916	589.461	94.763	2305.02	14.409
Ctrl MO N-C	Non Clone- Clone	h1b21	8.916	548.382	130.821	2427.533	14.409
Ctrl MO N-C	Non Clone- Clone	h1b3	8.862	146.684	1.572	821.695	14.321
Ctrl MO N-C	Non Clone- Clone	h1b3	8.051	365.056	74.873	1727.645	13.003
Ctrl MO N-C	Non Clone- Clone	h1b3	8.051	281.181	33.87	1897.599	13.003
Ctrl MO N-C	Non Clone- Clone	h1b3	8.591	438.729	116.201	3534.892	13.882
Ctrl MO N-C	Non Clone- Clone	h1b3	8.591	399.883	79.18	2247.862	13.882
Ctrl MO N-C	Non Clone- Clone	h1b4	6.214	284.344	18.592	1345.32	10.016
Ctrl MO N-C	Non Clone- Clone	h1b4	6.214	361.208	50.681	1270.257	10.016
Ctrl MO N-C	Non Clone- Clone	h1b4	6.214	373.027	60.812	1383.416	10.016
Ctrl MO N-C	Non Clone- Clone	h1b4	6.214	374.962	78.33	944.522	10.016
Ctrl MO N-C	Non Clone- Clone	h1b4	6.214	323.618	32.538	1032.632	10.016
Ctrl MO N-C	Non Clone- Clone	h1b4	6.214	250.398	29.775	957.921	10.016
Ctrl MO N-C	Non Clone- Clone	h1b5	4.809	162.073	7.951	501.369	7.732
Ctrl MO N-C	Non Clone- Clone	h1b5	4.809	240.171	25.591	785.822	7.732
Ctrl MO N-C	Non Clone- Clone	h1b5	4.809	344.865	54.035	1745.893	7.732
Ctrl MO N-C	Non Clone- Clone	h1b5	4.593	547.264	145.589	1602.036	7.38
Ctrl MO N-C	Non Clone- Clone	h1b5	4.593	501.525	108.204	1193.367	7.38
Ctrl MO N-C	Non Clone- Clone	h1b5	4.593	397.891	116.664	1543.51	7.38
Ctrl MO N-C	Non Clone- Clone	h1b6	11.779	288.456	19.26	1487.206	19.065
Ctrl MO N-C	Non Clone- Clone	h1b6	11.779	451.946	37.032	1886.274	19.065
Ctrl MO N-C	Non Clone- Clone	h1b6	11.779	476.243	70.66	1463.734	19.065
Ctrl MO N-C	Non Clone- Clone	h1b6	11.779	453.687	60.979	1662.848	19.065
Ctrl MO N-C	Non Clone- Clone	h1b6	11.779	388.113	46.248	1101.718	19.065
Ctrl MO N-C	Non Clone- Clone	h1b7	3.026	128.108	11.171	332.995	4.832
Ctrl MO N-C	Non Clone- Clone	h1b7	3.026	326.758	49.366	1044.298	4.832
Ctrl MO N-C	Non Clone- Clone	h1b7	3.026	538.748	100.249	1356.505	4.832
Ctrl MO N-C	Non Clone- Clone	h1b7	3.026	570.185	144.924	1162.505	4.832
Ctrl MO N-C	Non Clone- Clone	h1b7	3.026	585.001	153.623	1506.218	4.832
Ctrl MO N-C	Non Clone- Clone	h1b7	3.026	574.957	124.138	2273.42	4.832
Ctrl MO N-C	Non Clone- Clone	h1b8	17.615	222.765	32.817	689.287	28.554
Ctrl MO N-C	Non Clone- Clone	h1b8	17.615	377.533	59.028	1261.908	28.554
Ctrl MO N-C	Non Clone- Clone	h1b8	17.615	401.748	63.181	2087.896	28.554
Ctrl MO N-C	Non Clone- Clone	h1b8	17.615	393.296	47.792	2258.767	28.554
Ctrl MO N-C	Non Clone- Clone	h1b8	17.615	392.64	28.911	2397.932	28.554
Ctrl MO N-C	Non Clone- Clone	h1b8	17.615	395.242	44.861	1876.646	28.554
Ctrl MO N-C	Non Clone- Clone	h1b9	6.862	321.982	26.92	761.124	11.07
Ctrl MO N-C	Non Clone- Clone	h1b9	6.862	411.547	38.835	1843.39	11.07
Ctrl MO N-C	Non Clone- Clone	h1b9	6.862	567.713	50.166	3054.412	11.07
Ctrl MO N-C	Non Clone- Clone	h1b9	6.862	639.543	65.681	3817.287	11.07
Ctrl MO N-C	Non Clone- Clone	h1b9	6.862	634.468	53.033	2778.747	11.07
Ctrl MO N-N	Non Clone- Non Clone	h1b1	12.86	207.592	5.459	795.996	20.822
Ctrl MO N-N	Non Clone- Non Clone	h1b1	12.86	301.599	16.183	1605.276	20.822
Ctrl MO N-N	Non Clone- Non Clone	h1b1	12.86	380.879	48.986	1690.414	20.822
Ctrl MO N-N	Non Clone- Non Clone	h1b1	12.536	474.924	78.654	1592.101	20.295
Ctrl MO N-N	Non Clone- Non Clone	h1b1	12.536	469.934	84.017	2649.866	20.295
Ctrl MO N-N	Non Clone- Non Clone	h1b1	12.536	365.166	77.592	2984.045	20.295
Ctrl MO N-N	Non Clone- Non Clone	h1b2	7.295	231.929	25.183	950.321	11.773
Ctrl MO N-N	Non Clone- Non Clone	h1b2	7.295	389.316	78.998	2513.855	11.773
Ctrl MO N-N	Non Clone- Non Clone	h1b2	7.295	439.649	86.721	1895.554	11.773
Ctrl MO N-N	Non Clone- Non Clone	h1b2	7.295	464.556	109.497	1621.627	11.773
Ctrl MO N-N	Non Clone- Non Clone	h1b2	7.295	505.308	70.459	2258.697	11.773
Ctrl MO N-N	Non Clone- Non Clone	h1b3	10.807	148.53	14.528	756.892	17.484
Ctrl MO N-N	Non Clone- Non Clone	h1b3	10.807	292.924	36.095	888.262	17.484
Ctrl MO N-N	Non Clone- Non Clone	h1b3	10.807	468.275	87.805	1508.774	17.484
Ctrl MO N-N	Non Clone- Non Clone	h1b3	10.807	611.18	86.409	1956.218	17.484
Ctrl MO N-N	Non Clone- Non Clone	h1b3	10.807	649.936	132.92	2217.159	17.484
Ctrl MO N-N	Non Clone- Non Clone	h1b3	10.807	600.183	82.68	1975.024	17.484
Ctrl MO N-N	Non Clone- Non Clone	h1b4	8.375	149.793	17.44	434.82	13.53
Ctrl MO N-N	Non Clone- Non Clone	h1b4	8.375	301.892	34.966	824.803	13.53
Ctrl MO N-N	Non Clone- Non Clone	h1b4	8.375	449.648	95.152	1344.588	13.53
Ctrl MO N-N	Non Clone- Non Clone	h1b4	8.375	488.332	137.322	1717.544	13.53
Ctrl MO N-N	Non Clone- Non Clone	h1b4	8.375	481.962	105.05	1683.06	13.53
Ctrl MO N-N	Non Clone- Non Clone	h1b4	8.375	440.266	83.038	1440.992	13.53
Ctrl MO N-N	Non Clone- Non Clone	h1b5	7.511	130.328	0.795	481.234	12.124
Ctrl MO N-N	Non Clone- Non Clone	h1b5	7.511	121.309	4.917	573.694	12.124
Ctrl MO N-N	Non Clone- Non Clone	h1b5	7.511	160.81	23.577	742.676	12.124
Ctrl MO N-N	Non Clone- Non Clone	h1b5	7.511	409.652	73.879	1530.131	12.124
Ctrl MO N-N	Non Clone- Non Clone	h1b5	7.511	349.394	58.543	1157.087	12.124
Ctrl MO N-N	Non Clone- Non Clone	h1b5	7.511	325.797	69.24	1335.871	12.124
Ctrl MO N-N	Non Clone- Non Clone	h1b5	7.511	377.719	69.13	1350.298	12.124
Ctrl MO N-N	Non Clone- Non Clone	h1b6	10.807	221.746	19.665	828.862	17.476
Ctrl MO N-N	Non Clone- Non Clone	h1b6	10.807	283.786	23.165	1494.224	17.476
Ctrl MO N-N	Non Clone- Non Clone	h1b6	10.807	270.405	57.839	2134.781	17.476
Ctrl MO N-N	Non Clone- Non Clone	h1b6	10.807	266.118	41.158	1495.026	17.476
Ctrl MO N-N	Non Clone- Non Clone	h1b6	10.807	310.555	53.902	1140.217	17.476
Ctrl MO N-N	Non Clone- Non Clone	h1b6	10.807	372.879	50.841	3526.11	17.476
Ctrl MO N-N	Non Clone- Non Clone	h1b7	8.754	132.828	4.543	416.758	14.142
Ctrl MO N-N	Non Clone- Non Clone	h1b7	8.754	289.353	27.292	843.611	14.142
Ctrl MO N-N	Non Clone- Non Clone	h1b7	8.754	350.516	70.118	1133.916	14.142
Ctrl MO N-N	Non Clone- Non Clone	h1b7	8.754	401.919	79.563	1455.158	14.142
Ctrl MO N-N	Non Clone- Non Clone	h1b7	8.754	487.335	87.897	2005.605	14.142
Ctrl MO N-N	Non Clone- Non Clone	h1b7	8.754	551.383	143.099	1759.108	14.142
Ctrl MO N-N	Non Clone- Non Clone	h1b7	8.754	532.307	106.654	1800.049	14.142
Ctrl MO N-N	Non Clone- Non Clone	h1b7	8.754	483.175	83.278	2405.198	14.142
Ctrl MO C-C	Clone-Clone	h8b1	8.916	120.088	14.237	411.519	14.409
Ctrl MO C-C	Clone-Clone	h8b1	8.916	254.815	55.757	789.518	14.409
Ctrl MO C-C	Clone-Clone	h8b1	8.916	333.993	68.903	944.617	14.409
Ctrl MO C-C	Clone-Clone	h8b1	8.916	379.77	119.98	1240.147	14.409
Ctrl MO C-C	Clone-Clone	h8b1	8.916	360.328	87.079	1064.585	14.409
Ctrl MO C-C	Clone-Clone	h8b1	10.05	522.653	119.126	1947.587	16.254
Ctrl MO C-C	Clone-Clone	h8b1	10.05	463.498	117.231	1975.075	16.254
Ctrl MO C-C	Clone-Clone	h8b1	10.05	391.692	101.681	1802.702	16.254
Ctrl MO C-C	Clone-Clone	h8b10	8.429	256.262	29.744	777.104	13.618
Ctrl MO C-C	Clone-Clone	h8b10	8.429	326.694	41.836	1700.862	13.618
Ctrl MO C-C	Clone-Clone	h8b10	8.429	362.329	50.662	2372.101	13.618
Ctrl MO C-C	Clone-Clone	h8b10	8.429	422.913	75.722	1908.212	13.618
Ctrl MO C-C	Clone-Clone	h8b10	8.429	512.266	47.959	1696.843	13.618
Ctrl MO C-C	Clone-Clone	h8b10	8.429	517.911	77.372	1609.976	13.618
Ctrl MO C-C	Clone-Clone	h8b10	8.429	475.426	61.826	2164.505	13.618
Ctrl MO C-C	Clone-Clone	h8b11	6.808	212.359	3.663	701.438	10.982
Ctrl MO C-C	Clone-Clone	h8b11	6.808	258.905	34.103	1067.024	10.982
Ctrl MO C-C	Clone-Clone	h8b11	6.808	307.62	34.607	1601.989	10.982
Ctrl MO C-C	Clone-Clone	h8b11	6.808	366.405	52.704	1780.442	10.982
Ctrl MO C-C	Clone-Clone	h8b11	6.808	504.254	56.875	1604.956	10.982
Ctrl MO C-C	Clone-Clone	h8b11	6.808	541.175	77.017	1734.628	10.982
Ctrl MO C-C	Clone-Clone	h8b11	6.808	515.63	66.814	1653.297	10.982
Ctrl MO C-C	Clone-Clone	h8b11	6.808	438.498	35.846	1627.411	10.982
Ctrl MO C-C	Clone-Clone	h8b12	9.348	99.271	2.271	395.04	15.112
Ctrl MO C-C	Clone-Clone	h8b12	9.348	251.973	10.942	752.295	15.112
Ctrl MO C-C	Clone-Clone	h8b12	9.348	326.367	24.337	1099.382	15.112
Ctrl MO C-C	Clone-Clone	h8b12	9.348	399.407	37.935	1279.159	15.112
Ctrl MO C-C	Clone-Clone	h8b12	9.348	488.19	41.586	2092.018	15.112
Ctrl MO C-C	Clone-Clone	h8b12	9.348	470.967	64.48	1761.705	15.112
Ctrl MO C-C	Clone-Clone	h8b12	9.24	700.433	82.168	1979.474	14.936
Ctrl MO C-C	Clone-Clone	h8b12	9.24	677.582	77.699	2531.435	14.936
Ctrl MO C-C	Clone-Clone	h8b12	9.24	554.688	62.784	2702.076	14.936
Ctrl MO C-C	Clone-Clone	h8b12	9.24	312.033	55.354	1161.313	14.936
Ctrl MO C-C	Clone-Clone	h8b2	10.158	200.823	22.358	613.681	16.429
Ctrl MO C-C	Clone-Clone	h8b2	10.158	368.343	50.638	1029.818	16.429
Ctrl MO C-C	Clone-Clone	h8b2	10.158	446.311	54.364	1289.2	16.429
Ctrl MO C-C	Clone-Clone	h8b2	10.158	529.088	46.327	1598.067	16.429
Ctrl MO C-C	Clone-Clone	h8b2	10.158	565.653	114.897	1793.557	16.429
Ctrl MO C-C	Clone-Clone	h8b2	10.158	380.87	21.807	1195.721	16.429
Ctrl MO C-C	Clone-Clone	h8b2	10.158	289.796	12.687	2891.292	16.429
Ctrl MO C-C	Clone-Clone	h8b3	12.158	203.4	14.652	660.601	19.68
Ctrl MO C-C	Clone-Clone	h8b3	12.158	338.206	30.086	1131.561	19.68
Ctrl MO C-C	Clone-Clone	h8b3	12.158	386.974	54.253	1456.046	19.68
Ctrl MO C-C	Clone-Clone	h8b3	12.158	465.741	67.16	1597.188	19.68
Ctrl MO C-C	Clone-Clone	h8b3	12.158	559.952	69.538	2085.759	19.68
Ctrl MO C-C	Clone-Clone	h8b3	12.158	654.097	95.762	2288.353	19.68
Ctrl MO C-C	Clone-Clone	h8b3	12.158	588.983	93.076	2544.903	19.68
Ctrl MO C-C	Clone-Clone	h8b4	7.619	255.918	34.263	756.159	12.297
Ctrl MO C-C	Clone-Clone	h8b4	7.619	422.35	88.329	1490.545	12.297
Ctrl MO C-C	Clone-Clone	h8b4	7.619	487.423	100.79	1785.763	12.297
Ctrl MO C-C	Clone-Clone	h8b4	7.619	588.614	110.816	1964.036	12.297
Ctrl MO C-C	Clone-Clone	h8b4	7.619	721.133	146.72	2039.452	12.297
Ctrl MO C-C	Clone-Clone	h8b4	7.619	595.6	179.495	1571.592	12.297
Ctrl MO C-C	Clone-Clone	h8b4	7.619	438.938	109.183	2060.153	12.297
Ctrl MO C-C	Clone-Clone	h8b4	7.619	330.428	69.328	2016.948	12.297
Ctrl MO C-C	Clone-Clone	h8b5	8.051	238.335	14.713	717.107	13.003
Ctrl MO C-C	Clone-Clone	h8b5	8.051	374.366	56.66	1607.485	13.003
Ctrl MO C-C	Clone-Clone	h8b5	8.051	437.583	81.145	1699.524	13.003
Ctrl MO C-C	Clone-Clone	h8b5	8.051	473.925	46.988	1850.803	13.003
Ctrl MO C-C	Clone-Clone	h8b5	8.051	516.702	56.384	2562.654	13.003
Ctrl MO C-C	Clone-Clone	h8b5	8.051	431.979	77.428	2513.669	13.003
Ctrl MO C-C	Clone-Clone	h8b5	8.051	378.802	104.707	1235.663	13.003
Ctrl MO C-C	Clone-Clone	h8b6	9.564	509.391	82.926	1514.019	15.463
Ctrl MO C-C	Clone-Clone	h8b6	9.564	568.238	114.339	1674.683	15.463
Ctrl MO C-C	Clone-Clone	h8b6	9.564	606.343	85.21	2093.012	15.463
Ctrl MO C-C	Clone-Clone	h8b6	9.564	649.703	73.355	1975.755	15.463
Ctrl MO C-C	Clone-Clone	h8b6	9.564	499.745	69.434	1536.757	15.463
Ctrl MO C-C	Clone-Clone	h8b6	9.564	379.085	49.688	1719.012	15.463
Ctrl MO C-C	Clone-Clone	h8b7	8.375	326.52	50.016	719.324	13.53
Ctrl MO C-C	Clone-Clone	h8b7	8.375	460.58	55.844	1114.201	13.53
Ctrl MO C-C	Clone-Clone	h8b7	8.375	525.167	80.929	2281.059	13.53
Ctrl MO C-C	Clone-Clone	h8b7	8.375	583.594	122.237	2677.679	13.53
Ctrl MO C-C	Clone-Clone	h8b7	8.375	678.177	150.161	2078.601	13.53
Ctrl MO C-C	Clone-Clone	h8b7	8.375	710.743	152.19	2399.605	13.53
Ctrl MO C-C	Clone-Clone	h8b7	8.375	559.871	142.916	1961.393	13.53
Ctrl MO C-C	Clone-Clone	h8b8	8.808	255.731	17.402	755.12	14.233
Ctrl MO C-C	Clone-Clone	h8b8	8.808	354.365	37.051	1632.941	14.233
Ctrl MO C-C	Clone-Clone	h8b8	8.808	390.059	51.322	1662.9	14.233
Ctrl MO C-C	Clone-Clone	h8b8	8.808	420.251	67.613	2068.753	14.233
Ctrl MO C-C	Clone-Clone	h8b8	8.808	482.167	49.92	2030.365	14.233
Ctrl MO C-C	Clone-Clone	h8b8	8.808	586.59	112.315	2081.428	14.233
Ctrl MO C-C	Clone-Clone	h8b8	8.808	546.463	77.539	2317.131	14.233
Ctrl MO C-C	Clone-Clone	h8b9	5.403	191.311	0	549.37	8.698
Ctrl MO C-C	Clone-Clone	h8b9	5.403	316.757	4.077	1033.749	8.698
Ctrl MO C-C	Clone-Clone	h8b9	5.403	353.239	6.976	1019.11	8.698
Ctrl MO C-C	Clone-Clone	h8b9	5.403	382.79	17.971	1387.133	8.698
Ctrl MO C-C	Clone-Clone	h8b9	5.403	412.396	21.176	1618.2	8.698
Ctrl MO C-C	Clone-Clone	h8b9	5.403	468.436	56.354	2714.908	8.698
Ctrl MO C-C	Clone-Clone	h8b9	5.403	414.012	27.847	1877.759	8.698
Ctrl MO N-C	Non Clone- Clone	h8b1	9.24	280.793	25.676	983.69	14.936
Ctrl MO N-C	Non Clone- Clone	h8b1	9.24	344.8	62.611	1475.954	14.936
Ctrl MO N-C	Non Clone- Clone	h8b1	9.24	442.047	51.453	2087.202	14.936
Ctrl MO N-C	Non Clone- Clone	h8b1	9.24	557.426	55.33	1934.408	14.936
Ctrl MO N-C	Non Clone- Clone	h8b1	9.24	576.134	66.693	2004.635	14.936
Ctrl MO N-C	Non Clone- Clone	h8b1	9.24	560.417	47.993	1887.409	14.936
Ctrl MO N-C	Non Clone- Clone	h8b1	9.24	529.775	63.32	2268.662	14.936
Ctrl MO N-C	Non Clone- Clone	h8b2	13.292	166.039	1.338	540.352	21.525
Ctrl MO N-C	Non Clone- Clone	h8b2	13.292	258.957	12.278	1282.149	21.525
Ctrl MO N-C	Non Clone- Clone	h8b2	13.292	284.53	34.468	1266.698	21.525
Ctrl MO N-C	Non Clone- Clone	h8b2	13.292	293.176	43.531	1643.939	21.525
Ctrl MO N-C	Non Clone- Clone	h8b2	13.292	308.706	32.592	1804.805	21.525
Ctrl MO N-C	Non Clone- Clone	h8b2	13.509	474.827	105.025	1907.412	21.877
Ctrl MO N-C	Non Clone- Clone	h8b2	13.509	420.33	24.129	1958.65	21.877
Ctrl MO N-C	Non Clone- Clone	h8b2	13.509	386.009	44.528	1768.933	21.877
Ctrl MO N-C	Non Clone- Clone	h8b2	13.509	364.21	36.373	2008.581	21.877
Ctrl MO N-C	Non Clone- Clone	h8b3	10.807	341.911	35.322	1004.429	17.484
Ctrl MO N-C	Non Clone- Clone	h8b3	10.807	419.1	40.524	1229.931	17.484
Ctrl MO N-C	Non Clone- Clone	h8b3	10.807	471.169	63.197	1561.204	17.484
Ctrl MO N-C	Non Clone- Clone	h8b3	10.807	497.798	68.46	2227.521	17.484
Ctrl MO N-C	Non Clone- Clone	h8b3	10.807	662.164	44.634	2346.379	17.484
Ctrl MO N-C	Non Clone- Clone	h8b3	10.807	705.644	124.061	1969.93	17.484
Ctrl MO N-C	Non Clone- Clone	h8b3	10.807	633.078	106.245	1883.9	17.484
Ctrl MO N-C	Non Clone- Clone	h8b4	10.537	272.04	24.787	1099.315	17.045
Ctrl MO N-C	Non Clone- Clone	h8b4	10.537	269.4	28.231	1587.231	17.045
Ctrl MO N-C	Non Clone- Clone	h8b4	10.537	266.085	23.909	1548.407	17.045
Ctrl MO N-C	Non Clone- Clone	h8b4	10.537	256.493	27.196	1206.945	17.045
Ctrl MO N-C	Non Clone- Clone	h8b4	10.537	262.943	24.339	1309.444	17.045
Ctrl MO N-C	Non Clone- Clone	h8b4	10.537	273.05	23.129	1324.887	17.045
Ctrl MO N-C	Non Clone- Clone	h8b4	10.537	266.787	32.726	1136.35	17.045
Ctrl MO N-C	Non Clone- Clone	h8b5	7.835	283.549	0.191	1008.641	12.652
Ctrl MO N-C	Non Clone- Clone	h8b5	7.835	327.346	11.698	1534.177	12.652
Ctrl MO N-C	Non Clone- Clone	h8b5	7.835	356.814	10.194	1887.114	12.652
Ctrl MO N-C	Non Clone- Clone	h8b5	7.835	464.582	20.462	2146.402	12.652
Ctrl MO N-C	Non Clone- Clone	h8b5	7.835	468.876	53.909	2689.869	12.652
Ctrl MO N-C	Non Clone- Clone	h8b5	7.835	437.248	52.652	2407.832	12.652
Ctrl MO N-C	Non Clone- Clone	h8b5	7.835	401.227	16.935	1492.001	12.652
Ctrl MO N-C	Non Clone- Clone	h8b6	8.429	251.481	19.146	874.434	13.618
Ctrl MO N-C	Non Clone- Clone	h8b6	8.429	306.465	40.27	1294.578	13.618
Ctrl MO N-C	Non Clone- Clone	h8b6	8.429	352.116	51.615	2127.714	13.618
Ctrl MO N-C	Non Clone- Clone	h8b6	8.429	424.555	36.519	2104.963	13.618
Ctrl MO N-C	Non Clone- Clone	h8b6	8.429	443.874	20.6	1838.317	13.618
Ctrl MO N-C	Non Clone- Clone	h8b6	8.429	448.524	28.7	2122.383	13.618
Ctrl MO N-C	Non Clone- Clone	h8b6	8.429	420.844	23.195	1601.953	13.618
Ctrl MO N-C	Non Clone- Clone	h8b6	8.429	315.265	29.519	1263.094	13.618
Ctrl MO N-C	Non Clone- Clone	h8b6	8.429	224.703	20.266	1413.739	13.618
Ctrl MO N-C	Non Clone- Clone	h8b7	13.671	194.491	0.278	821.137	22.14
Ctrl MO N-C	Non Clone- Clone	h8b7	13.671	262.17	4.17	1200.71	22.14
Ctrl MO N-C	Non Clone- Clone	h8b7	13.671	304.496	10.176	1699.803	22.14
Ctrl MO N-C	Non Clone- Clone	h8b7	13.671	374.132	16.139	1979.255	22.14
Ctrl MO N-C	Non Clone- Clone	h8b7	13.671	398.566	13.975	2029.935	22.14
Ctrl MO N-C	Non Clone- Clone	h8b7	13.671	399.255	47.977	2185.102	22.14
Ctrl MO N-C	Non Clone- Clone	h8b7	13.671	412.899	36.165	2414.768	22.14
Ctrl MO N-C	Non Clone- Clone	h8b7	13.671	433.384	33.955	1891.579	22.14
Ctrl MO N-C	Non Clone- Clone	h8b7	13.671	364.385	3.987	1686.314	22.14
Ctrl MO N-N	Non Clone- Non Clone	h8b1	7.619	308.528	53.06	1035.164	12.3
Ctrl MO N-N	Non Clone- Non Clone	h8b1	7.619	372.874	3.673	1427.821	12.3
Ctrl MO N-N	Non Clone- Non Clone	h8b1	7.619	415.493	2.911	1693.507	12.3
Ctrl MO N-N	Non Clone- Non Clone	h8b1	7.619	393.702	1.656	1337.004	12.3
Ctrl MO N-N	Non Clone- Non Clone	h8b1	7.619	408.941	0.824	2014.612	12.3
Ctrl MO N-N	Non Clone- Non Clone	h8b1	7.619	406.852	0.034	2218.047	12.3
Ctrl MO N-N	Non Clone- Non Clone	h8b2	10.699	243.933	16.148	791.979	17.308
Ctrl MO N-N	Non Clone- Non Clone	h8b2	10.699	303.654	39.481	993.662	17.308
Ctrl MO N-N	Non Clone- Non Clone	h8b2	10.699	363.788	52.251	1357.227	17.308
Ctrl MO N-N	Non Clone- Non Clone	h8b2	10.699	404.661	38.809	1777.606	17.308
Ctrl MO N-N	Non Clone- Non Clone	h8b2	10.699	380.534	42.082	1604.845	17.308
Ctrl MO N-N	Non Clone- Non Clone	h8b2	10.699	315.821	19.484	1329.679	17.308
Ctrl MO N-N	Non Clone- Non Clone	h8b2	10.699	297.433	39.663	1717.819	17.308
Ctrl MO N-N	Non Clone- Non Clone	h8b2	10.915	454.354	43.575	1590.623	17.66
Ctrl MO N-N	Non Clone- Non Clone	h8b2	10.915	370.368	42.194	1567.579	17.66
Ctrl MO N-N	Non Clone- Non Clone	h8b3	9.078	170.907	2.241	1020.702	14.672
Ctrl MO N-N	Non Clone- Non Clone	h8b3	9.078	261.912	1.169	1569.409	14.672
Ctrl MO N-N	Non Clone- Non Clone	h8b3	9.078	331.974	0	1412.735	14.672
Ctrl MO N-N	Non Clone- Non Clone	h8b3	9.078	372.41	0.002	1605.935	14.672
Ctrl MO N-N	Non Clone- Non Clone	h8b3	9.078	394.649	1.202	1288.362	14.672
Ctrl MO N-N	Non Clone- Non Clone	h8b3	9.078	402.284	0.277	1422.305	14.672
Ctrl MO N-N	Non Clone- Non Clone	h8b3	9.078	421.583	3.347	1329.045	14.672
Ctrl MO N-N	Non Clone- Non Clone	h8b3	9.078	401.874	0.47	1706.821	14.672
Ctrl MO N-N	Non Clone- Non Clone	h8b3	9.078	317.271	3.913	1679.939	14.672
Ecad MO C-C	Clone-Clone	h8b1	5.62	118.033	10.475	374.961	9.049
Ecad MO C-C	Clone-Clone	h8b1	5.133	131.721	18.765	491.561	8.259
Ecad MO C-C	Clone-Clone	h8b1	5.133	150.424	22.501	480.953	8.259
Ecad MO C-C	Clone-Clone	h8b1	5.133	162.302	15.997	996.185	8.259
Ecad MO C-C	Clone-Clone	h8b1	5.133	154.783	11.483	752.379	8.259
Ecad MO C-C	Clone-Clone	h8b2	7.673	104.884	13.081	354.638	12.388
Ecad MO C-C	Clone-Clone	h8b2	7.673	140.991	13.75	402.699	12.388
Ecad MO C-C	Clone-Clone	h8b2	7.673	152.087	12.054	458.11	12.388
Ecad MO C-C	Clone-Clone	h8b2	8.429	191.771	8.03	557.147	13.617
Ecad MO C-C	Clone-Clone	h8b2	8.429	186.459	9.239	605.834	13.617
Ecad MO C-C	Clone-Clone	h8b2	8.429	165.268	11.703	567.147	13.617
Ecad MO C-C	Clone-Clone	h8b2	8.429	150.287	18.755	633.193	13.617
Ecad MO C-C	Clone-Clone	h8b2	8.429	131.342	3.982	407.619	13.617
Ecad MO C-C	Clone-Clone	h8b3	10.915	114.138	2.045	483.245	17.66
Ecad MO C-C	Clone-Clone	h8b3	10.915	132.966	13.397	422.127	17.66
Ecad MO C-C	Clone-Clone	h8b3	10.915	155.14	19.966	426.415	17.66
Ecad MO C-C	Clone-Clone	h8b3	10.915	168.778	25.277	472.194	17.66
Ecad MO C-C	Clone-Clone	h8b3	10.915	171.697	12.163	1007.069	17.66
Ecad MO C-C	Clone-Clone	h8b3	10.915	166.535	13.093	1095.983	17.66
Ecad MO C-C	Clone-Clone	h8b3	17.021	168.766	11.046	917.377	27.587
Ecad MO C-C	Clone-Clone	h8b3	17.021	155.216	0.868	733.837	27.587
Ecad MO C-C	Clone-Clone	h8b4	11.077	128.148	4.263	1763.658	17.923
Ecad MO C-C	Clone-Clone	h8b4	11.077	144.468	6.58	1498.247	17.923
Ecad MO C-C	Clone-Clone	h8b4	11.077	170.152	8.555	1651.878	17.923
Ecad MO C-C	Clone-Clone	h8b4	11.077	199.991	14.62	3543.705	17.923
Ecad MO C-C	Clone-Clone	h8b4	11.077	177.527	14.488	1860.506	17.923
Ecad MO C-C	Clone-Clone	h8b5	7.295	100.094	4.672	375.941	11.773
Ecad MO C-C	Clone-Clone	h8b5	7.295	125.31	5.247	751.277	11.773
Ecad MO C-C	Clone-Clone	h8b5	7.295	128.34	7.456	753.162	11.773
Ecad MO C-C	Clone-Clone	h8b5	7.295	115.127	7.112	601.354	11.773
Ecad MO C-C	Clone-Clone	h8b5	7.295	110.966	2.029	415.485	11.773
Ecad MO C-C	Clone-Clone	h8b5	7.295	109.73	4.294	405.737	11.773
Ecad MO C-C	Clone-Clone	h8b5	7.295	125.299	0.339	762.367	11.773
Ecad MO C-C	Clone-Clone	h8b6	7.565	83.724	0.115	310.758	12.212
Ecad MO C-C	Clone-Clone	h8b6	7.565	100.851	0.011	303.927	12.212
Ecad MO C-C	Clone-Clone	h8b6	7.565	99.949	2.494	316.286	12.212
Ecad MO C-C	Clone-Clone	h8b6	7.565	109.531	8.033	326.844	12.212
Ecad MO C-C	Clone-Clone	h8b6	7.565	132.777	8.058	508.427	12.212
Ecad MO C-C	Clone-Clone	h8b6	7.565	162.856	17.873	771.864	12.212
Ecad MO N-C	Non Clone- Clone	h8b1	14.103	98.663	3.794	394.365	22.835
Ecad MO N-C	Non Clone- Clone	h8b1	14.103	172.538	14.702	517.781	22.835
Ecad MO N-C	Non Clone- Clone	h8b1	14.103	221.681	29.433	671.086	22.835
Ecad MO N-C	Non Clone- Clone	h8b1	13.346	291.061	48.082	1889.321	21.577
Ecad MO N-C	Non Clone- Clone	h8b1	13.346	353.44	67.018	2431.311	21.577
Ecad MO N-C	Non Clone- Clone	h8b1	13.022	375.895	48.001	2283.766	21.052
Ecad MO N-C	Non Clone- Clone	h8b1	13.022	242.09	20.336	1138.005	21.052
Ecad MO N-C	Non Clone- Clone	h8b2	9.564	186.029	8.841	547.749	15.463
Ecad MO N-C	Non Clone- Clone	h8b2	9.564	223.614	8.871	655.882	15.463
Ecad MO N-C	Non Clone- Clone	h8b2	9.564	242.929	22.778	725.683	15.463
Ecad MO N-C	Non Clone- Clone	h8b2	9.564	267.015	47.78	1677.611	15.463
Ecad MO N-C	Non Clone- Clone	h8b2	9.564	283.999	23.623	2347.038	15.463
Ecad MO N-C	Non Clone- Clone	h8b2	9.564	266.889	29.448	1420.175	15.463
Ecad MO N-C	Non Clone- Clone	h8b3	15.184	144.704	2.901	671.668	24.6
Ecad MO N-C	Non Clone- Clone	h8b3	15.184	181.86	4.758	989.53	24.6
Ecad MO N-C	Non Clone- Clone	h8b3	14.481	296.056	26.362	1186.902	23.458
Ecad MO N-C	Non Clone- Clone	h8b3	14.481	336.161	34.946	2209.588	23.458
Ecad MO N-C	Non Clone- Clone	h8b3	14.481	342.616	41.913	3700.913	23.458
Ecad MO N-C	Non Clone- Clone	h8b3	14.481	241.883	34.266	1979.158	23.458
Ecad MO N-C	Non Clone- Clone	h8b4	16.264	137.862	3.418	602.157	26.357
Ecad MO N-C	Non Clone- Clone	h8b4	16.264	195.698	14.573	811.74	26.357
Ecad MO N-C	Non Clone- Clone	h8b4	16.264	224.636	18.212	1401.627	26.357
Ecad MO N-C	Non Clone- Clone	h8b4	16.264	247.741	20.345	1435.116	26.357
Ecad MO N-C	Non Clone- Clone	h8b4	16.264	249.087	13.229	1300.746	26.357
Ecad MO N-C	Non Clone- Clone	h8b4	16.264	255.683	22.535	1257.04	26.357
Ecad MO N-C	Non Clone- Clone	h8b5	6.16	254.998	33.358	779.213	9.928
Ecad MO N-C	Non Clone- Clone	h8b5	6.16	305.991	35.513	854.435	9.928
Ecad MO N-C	Non Clone- Clone	h8b5	6.16	353.243	37.542	1444.907	9.928
Ecad MO N-C	Non Clone- Clone	h8b5	6.16	375.302	57.98	1313.13	9.928
Ecad MO N-C	Non Clone- Clone	h8b5	6.16	293.658	46.137	949.404	9.928
Ecad MO N-C	Non Clone- Clone	h8b6	10.591	288.517	32.999	782.83	17.132
Ecad MO N-C	Non Clone- Clone	h8b6	10.591	318.839	34.174	860.575	17.132
Ecad MO N-C	Non Clone- Clone	h8b6	10.591	328.764	67.758	1411.243	17.132
Ecad MO N-C	Non Clone- Clone	h8b6	10.591	325.339	56.847	3230.216	17.132
Ecad MO N-C	Non Clone- Clone	h8b6	10.591	288.93	57.646	1820.794	17.132
Ecad MO N-N	Non Clone- Non Clone	h8b1	6.376	234.927	0.685	733.214	10.279
Ecad MO N-N	Non Clone- Non Clone	h8b1	6.376	335.571	1.67E-06	1190.038	10.279
Ecad MO N-N	Non Clone- Non Clone	h8b1	6.376	397.79	2.922	1851.291	10.279
Ecad MO N-N	Non Clone- Non Clone	h8b1	6.376	442.438	1.758	1908.618	10.279
Ecad MO N-N	Non Clone- Non Clone	h8b1	6.376	402.172	0.602	2223.891	10.279
Ecad MO N-N	Non Clone- Non Clone	h8b2	7.511	330.705	10.674	787.181	12.124
Ecad MO N-N	Non Clone- Non Clone	h8b2	7.511	442.836	99.208	1261.797	12.124
Ecad MO N-N	Non Clone- Non Clone	h8b2	7.511	512.7	106.922	1698.412	12.124
Ecad MO N-N	Non Clone- Non Clone	h8b2	7.511	513.369	89.821	1943.041	12.124
Ecad MO N-N	Non Clone- Non Clone	h8b2	7.511	315.236	48.295	1702.331	12.124
Ecad MO N-N	Non Clone- Non Clone	h8b3	9.78	222.739	40.235	645.238	15.815
Ecad MO N-N	Non Clone- Non Clone	h8b3	9.78	321.298	42.439	1078.422	15.815
Ecad MO N-N	Non Clone- Non Clone	h8b3	9.78	373.668	72.044	1766.408	15.815
Ecad MO N-N	Non Clone- Non Clone	h8b3	9.78	408.496	42.912	3036.591	15.815
Ecad MO N-N	Non Clone- Non Clone	h8b3	9.78	432.316	75.97	1408.675	15.815
Ecad MO N-N	Non Clone- Non Clone	h8b3	9.78	412.011	60.903	1877.256	15.815
Ecad MO N-N	Non Clone- Non Clone	h8b4	9.132	156.463	12.01	521.744	14.76
Ecad MO N-N	Non Clone- Non Clone	h8b4	9.132	198.424	15.569	672.767	14.76
Ecad MO N-N	Non Clone- Non Clone	h8b4	9.132	221.647	11.632	1087.592	14.76
Ecad MO N-N	Non Clone- Non Clone	h8b4	9.132	260.618	24.228	1422.313	14.76
Ecad MO N-N	Non Clone- Non Clone	h8b4	9.132	289.634	39.456	1216.24	14.76
Ecad MO N-N	Non Clone- Non Clone	h8b4	9.132	220.239	15.325	821.025	14.76
Ecad MO N-N	Non Clone- Non Clone	h8b5	11.293	133.106	10.207	397.036	18.275
Ecad MO N-N	Non Clone- Non Clone	h8b5	11.293	194.614	14.725	644.673	18.275
Ecad MO N-N	Non Clone- Non Clone	h8b5	11.293	226.096	28.643	806.22	18.275
Ecad MO N-N	Non Clone- Non Clone	h8b5	11.293	252.548	14.153	1149.551	18.275
Ecad MO N-N	Non Clone- Non Clone	h8b5	11.293	274.062	18.902	1225.838	18.275
Ecad MO N-N	Non Clone- Non Clone	h8b5	11.293	307.377	32.952	2347.478	18.275
