# Supplementary material for: Stepwise polarisation of developing bilayered epidermis is mediated by aPKC and E-cadherin in zebrafish
Source: eLife. 2020 Jan 22;9:e49064. doi: 10.7554/eLife.49064 (PMC6975926; doi:10.7554/eLife.49064)
Supplement: Figure 4—figure supplement 2—source data 6. [file elife-49064-fig4-figsupp2-data6.csv]

Genotype	Boundary	Cell name	Area	Mean	Min	Max	Length
Ctrl MO CO	Complete Overlap	h1b1	6.484	386.413	72.976	2000.202	10.455
Ctrl MO CO	Complete Overlap	h1b1	6.484	249.502	31.059	1228.901	10.455
Ctrl MO CO	Complete Overlap	h1b1	6.484	143.312	5.98	785.461	10.455
Ctrl MO CO	Complete Overlap	h1b1	6.484	82.527	1.314	370.277	10.455
Ctrl MO CO	Complete Overlap	h1b1	6.484	52.064	0.462	298.003	10.455
Ctrl MO CO	Complete Overlap
Ctrl MO CO	Complete Overlap	h1b2	5.295	377.416	61.845	2284.986	8.513
Ctrl MO CO	Complete Overlap	h1b2	5.295	214.657	40.927	584.466	8.513
Ctrl MO CO	Complete Overlap	h1b2	5.295	107.3	5.35	337.678	8.513
Ctrl MO CO	Complete Overlap	h1b2	5.295	77.166	5.29	831.447	8.513
Ctrl MO CO	Complete Overlap
Ctrl MO CO	Complete Overlap	h1b3	8.97	503.148	76.014	2164.28	14.497
Ctrl MO CO	Complete Overlap	h1b3	8.97	350.147	43.217	1175.294	14.497
Ctrl MO CO	Complete Overlap	h1b3	8.97	186.193	37.159	615.158	14.497
Ctrl MO CO	Complete Overlap	h1b3	8.97	86.137	2.598	279.777	14.497
Ctrl MO CO	Complete Overlap
Ctrl MO CO	Complete Overlap	h1b4	10.699	461.902	35.447	4095	17.308
Ctrl MO CO	Complete Overlap	h1b4	10.699	400.196	42.715	4095	17.308
Ctrl MO CO	Complete Overlap	h1b4	10.699	268.048	24.458	2726.34	17.308
Ctrl MO CO	Complete Overlap	h1b4	10.699	142.587	12.927	1089.107	17.308
Ctrl MO CO	Complete Overlap	h1b4	10.699	65.607	0.114	264.341	17.308
Ctrl MO CO	Complete Overlap
Ctrl MO CO	Complete Overlap	h1b5	9.942	387.665	20.298	4089.026	16.078
Ctrl MO CO	Complete Overlap	h1b5	9.942	371.066	37.443	2885.533	16.078
Ctrl MO CO	Complete Overlap	h1b5	9.942	266.571	24.973	1121.691	16.078
Ctrl MO CO	Complete Overlap	h1b5	9.942	180.718	5.998	1779.268	16.078
Ctrl MO CO	Complete Overlap	h1b5	9.942	123.816	5.192	2365.231	16.078
Ctrl MO CO	Complete Overlap	h1b5	9.942	102.207	0.015	3550.438	16.078
Ctrl MO CO	Complete Overlap
Ctrl MO CO	Complete Overlap	h1b6	7.187	726.135	96.123	4081.844	11.597
Ctrl MO CO	Complete Overlap	h1b6	7.187	607.488	82.622	2963.535	11.597
Ctrl MO CO	Complete Overlap	h1b6	7.187	448.276	85.364	2008.723	11.597
Ctrl MO CO	Complete Overlap	h1b6	7.187	332.393	52.921	1332.58	11.597
Ctrl MO CO	Complete Overlap	h1b6	7.187	279.402	34.479	4047.747	11.597
Ctrl MO CO	Complete Overlap	h1b6	7.187	245.464	20.543	4095	11.597
Ctrl MO CO	Complete Overlap
Ctrl MO CO	Complete Overlap	h1b7	10.05	548.479	94.017	4095	16.253
Ctrl MO CO	Complete Overlap	h1b7	10.05	415.044	47.613	3230.278	16.253
Ctrl MO CO	Complete Overlap	h1b7	10.05	337.269	19.78	3463.568	16.253
Ctrl MO CO	Complete Overlap	h1b7	10.05	264.607	5.199	2092.853	16.253
Ctrl MO CO	Complete Overlap
Ctrl MO CO	Complete Overlap	h1b8	11.401	522.533	71.182	4074.014	18.45
Ctrl MO CO	Complete Overlap	h1b8	11.401	504.514	74.2	4095	18.45
Ctrl MO CO	Complete Overlap	h1b8	11.401	380.25	87.858	2704.583	18.45
Ctrl MO CO	Complete Overlap	h1b8	11.401	321.108	39.635	3891.263	18.45
Ctrl MO CO	Complete Overlap	h1b8	11.401	327.347	30.173	4095	18.45
Ctrl MO CO	Complete Overlap	h1b8	11.401	287.849	10.354	4095	18.45
Ctrl MO CO	Complete Overlap
Ctrl MO CO	Complete Overlap	h1b9	10.645	620.638	92.348	4095	17.22
Ctrl MO CO	Complete Overlap	h1b9	10.645	527.859	52.94	2187.24	17.22
Ctrl MO CO	Complete Overlap	h1b9	10.645	455.503	44.831	2013.836	17.22
Ctrl MO CO	Complete Overlap	h1b9	10.645	391.477	26.487	2134.23	17.22
Ctrl MO CO	Complete Overlap	h1b9	10.645	313.382	20.08	1980.154	17.22
Ctrl MO CO	Complete Overlap	h1b9	10.645	237.81	13.821	1428.585	17.22
Ctrl MO CO	Complete Overlap
Ctrl MO CO	Complete Overlap	h1b10	8.754	603.189	129.032	3621.86	14.145
Ctrl MO CO	Complete Overlap	h1b10	8.754	484.906	68.516	2437.793	14.145
Ctrl MO CO	Complete Overlap	h1b10	8.754	346.168	52.821	2991.434	14.145
Ctrl MO CO	Complete Overlap	h1b10	8.754	225.691	19.845	1847.812	14.145
Ctrl MO CO	Complete Overlap	h1b10	8.754	129.754	1.851	1112.871	14.145
Ctrl MO CO	Complete Overlap
Ctrl MO CO	Complete Overlap	h1b11	10.969	507.681	86.993	3132.906	17.747
Ctrl MO CO	Complete Overlap	h1b11	10.969	352.787	41.184	1858.146	17.747
Ctrl MO CO	Complete Overlap	h1b11	10.969	239.53	31.313	841.313	17.747
Ctrl MO CO	Complete Overlap	h1b11	10.969	167.972	10.633	1268.892	17.747
Ctrl MO CO	Complete Overlap	h1b11	10.969	111.305	3.116	674.221	17.747
Ctrl MO CO	Complete Overlap
Ctrl MO CO	Complete Overlap	h1b12	7.889	650.77	77.515	3981.496	12.74
Ctrl MO CO	Complete Overlap	h1b12	7.889	304.338	17.976	1108.773	12.74
Ctrl MO CO	Complete Overlap	h1b12	7.889	205.497	37.802	625.406	12.74
Ctrl MO CO	Complete Overlap	h1b12	7.889	126.218	14.193	452.787	12.74
Ctrl MO CO	Complete Overlap	h1b12	7.889	76.893	3.067	226.149	12.74
Ctrl MO CO	Complete Overlap	h8b1	11.996	461.064	53.971	2562.24	19.417
Ctrl MO CO	Complete Overlap	h8b1	11.996	341.365	54.744	1326.892	19.417
Ctrl MO CO	Complete Overlap	h8b1	11.996	205.821	25.352	1611.242	19.417
Ctrl MO CO	Complete Overlap	h8b1	11.996	134.673	4.055	2198.518	19.417
Ctrl MO CO	Complete Overlap	h8b1	11.996	85.967	3.317	585.68	19.417
Ctrl MO CO	Complete Overlap
Ctrl MO CO	Complete Overlap	h8b2	11.779	480.596	49.031	2741.029	19.065
Ctrl MO CO	Complete Overlap	h8b2	11.779	444.29	28.512	2501.612	19.065
Ctrl MO CO	Complete Overlap	h8b2	11.779	307.662	45.214	1325.408	19.065
Ctrl MO CO	Complete Overlap	h8b2	11.779	185.411	10.594	1490.979	19.065
Ctrl MO CO	Complete Overlap	h8b2	11.779	136.011	3.082	2547.381	19.065
Ctrl MO CO	Complete Overlap
Ctrl MO CO	Complete Overlap	h8b3	10.104	529.766	126.536	3228.153	16.342
Ctrl MO CO	Complete Overlap	h8b3	10.104	452.805	93.294	2217.733	16.342
Ctrl MO CO	Complete Overlap	h8b3	10.104	381.145	38.99	4093.719	16.342
Ctrl MO CO	Complete Overlap	h8b3	10.104	305.9	18.427	4094.91	16.342
Ctrl MO CO	Complete Overlap	h8b3	10.104	154.562	14.418	1050.108	16.342
Ctrl MO CO	Complete Overlap
Ctrl MO CO	Complete Overlap	h8b4	11.563	441.576	60.939	2670.018	18.714
Ctrl MO CO	Complete Overlap	h8b4	11.563	396.542	53.922	1697.478	18.714
Ctrl MO CO	Complete Overlap	h8b4	11.563	282.732	25.514	1359.676	18.714
Ctrl MO CO	Complete Overlap	h8b4	11.563	199.341	4.642	1217.055	18.714
Ctrl MO CO	Complete Overlap	h8b4	11.563	207.405	1.706	3551.872	18.714
Ctrl MO CO	Complete Overlap	h8b4	11.563	232.124	6.45	4095	18.714
Ctrl MO CO	Complete Overlap
Ctrl MO CO	Complete Overlap	h8b5	6.916	464.764	87.009	3056.607	11.158
Ctrl MO CO	Complete Overlap	h8b5	6.916	423.601	54.676	2672.274	11.158
Ctrl MO CO	Complete Overlap	h8b5	6.916	279.775	45.056	921.179	11.158
Ctrl MO CO	Complete Overlap	h8b5	6.916	251.22	25.506	2941.691	11.158
Ctrl MO CO	Complete Overlap	h8b5	6.916	237.786	17.768	2443.561	11.158
Ctrl MO CO	Complete Overlap
Ctrl MO CO	Complete Overlap	h8b6	6.376	499.371	41.674	1440.292	10.279
Ctrl MO CO	Complete Overlap	h8b6	6.376	451.418	80.71	1704.934	10.279
Ctrl MO CO	Complete Overlap	h8b6	6.376	391.045	87.131	2726.695	10.279
Ctrl MO CO	Complete Overlap	h8b6	6.376	428.851	30.22	3735.1	10.279
Ctrl MO CO	Complete Overlap	h8b6	6.376	390.436	21.384	3893.34	10.279
Ctrl MO CO	Complete Overlap
Ctrl MO CO	Complete Overlap	h8b7	7.187	560.71	65.431	4088.516	11.597
Ctrl MO CO	Complete Overlap	h8b7	7.187	402.546	49.244	2644.075	11.597
Ctrl MO CO	Complete Overlap	h8b7	7.187	203.402	35.083	834.65	11.597
Ctrl MO CO	Complete Overlap	h8b7	7.187	163.003	10.15	546.341	11.597
Ctrl MO CO	Complete Overlap	h8b7	7.187	130.89	0.962	451.06	11.597
Ctrl MO CO	Complete Overlap
Ctrl MO CO	Complete Overlap	h8b8	9.402	431.703	46.464	3310.82	15.199
Ctrl MO CO	Complete Overlap	h8b8	9.402	398.436	26.422	2238.671	15.199
Ctrl MO CO	Complete Overlap	h8b8	9.402	348.797	34.167	3965.724	15.199
Ctrl MO CO	Complete Overlap	h8b8	9.402	228.958	21.334	1092.282	15.199
Ctrl MO CO	Complete Overlap	h8b8	9.402	186.448	21.581	761.356	15.199
Ctrl MO PO	Partial Overlap	h8b1	5.403	356.942	51.486	2862.694	8.698
Ctrl MO PO	Partial Overlap	h8b1	5.403	214.558	27.156	1079.29	8.698
Ctrl MO PO	Partial Overlap	h8b1	5.403	163.468	22.235	428.936	8.698
Ctrl MO PO	Partial Overlap	h8b1	5.403	153.397	18.797	589.752	8.698
Ctrl MO PO	Partial Overlap	h8b1	5.403	163.224	5.774	733.569	8.698
Ctrl MO PO	Partial Overlap
Ctrl MO PO	Partial Overlap	h8b2	6.376	514.996	32.69	2805.921	10.279
Ctrl MO PO	Partial Overlap	h8b2	6.376	590.062	118.57	3529.996	10.279
Ctrl MO PO	Partial Overlap	h8b2	6.376	578.048	83.687	4087.916	10.279
Ctrl MO PO	Partial Overlap	h8b2	6.376	370.752	31.318	1248.757	10.279
Ctrl MO PO	Partial Overlap	h8b2	6.376	224.362	39.439	949.032	10.279
Ctrl MO PO	Partial Overlap	h8b2	6.376	158.926	34.376	559.094	10.279
Ctrl MO PO	Partial Overlap	h8b2	6.376	118.944	20.758	426.906	10.279
Ctrl MO NO	No Overlap	h8b1	10.483	409.937	80.883	2699.437	16.957
Ctrl MO NO	No Overlap	h8b1	10.483	398.858	42.475	1599.242	16.957
Ctrl MO NO	No Overlap	h8b1	10.483	349.395	28.667	1446.18	16.957
Ctrl MO NO	No Overlap	h8b1	10.483	306.335	12.189	2091.2	16.957
Ctrl MO NO	No Overlap	h8b1	10.483	220.534	8.084	1699.265	16.957
Ctrl MO NO	No Overlap	h8b1	10.483	118.466	1.983	1046.166	16.957
Ctrl MO NO	No Overlap
Ctrl MO NO	No Overlap	h8b2	11.185	443.151	77.647	1828.764	18.099
Ctrl MO NO	No Overlap	h8b2	11.185	408.466	50.797	3723.325	18.099
Ctrl MO NO	No Overlap	h8b2	11.185	370.106	42.095	3592.856	18.099
Ctrl MO NO	No Overlap	h8b2	11.185	317.092	19.405	2628.555	18.099
Ctrl MO NO	No Overlap	h8b2	11.185	247.476	19.063	1316.654	18.099
Ctrl MO NO	No Overlap	h8b2	11.185	186.145	6.761	1029.869	18.099
Ctrl MO NO	No Overlap	h8b2	11.185	135.576	3.421	1538.563	18.099
Ctrl MO NO	No Overlap
Ctrl MO NO	No Overlap	h8b3	8.754	440.576	47.049	3999.483	14.145
Ctrl MO NO	No Overlap	h8b3	8.754	379.596	34.235	3177.27	14.145
Ctrl MO NO	No Overlap	h8b3	8.754	308.26	23.882	2022.154	14.145
Ctrl MO NO	No Overlap	h8b3	8.754	246.127	9.533	1158.347	14.145
Ctrl MO NO	No Overlap	h8b3	8.754	145.01	5.608	1159.354	14.145
Ctrl MO NO	No Overlap	h8b3	8.754	88.16	0.243	2096.694	14.145
Ctrl MO NO	No Overlap	h8b3	8.754	70.255	0.004	2445.646	14.145
Ecad MO CO	Complete Overlap	h8b1	13.076	194.68	22.782	889.679	21.171
Ecad MO CO	Complete Overlap	h8b1	13.076	187.567	16.318	1325.461	21.171
Ecad MO CO	Complete Overlap	h8b1	13.076	174.441	3.346	979.348	21.171
Ecad MO CO	Complete Overlap	h8b1	13.076	169.861	5.1	837.812	21.171
Ecad MO CO	Complete Overlap	h8b1	13.076	168.424	2.699	744.255	21.171
Ecad MO CO	Complete Overlap	h8b1	13.076	165.879	4.322	956.782	21.171
Ecad MO CO	Complete Overlap
Ecad MO CO	Complete Overlap	h8b2	12.32	181.435	17.776	777.724	19.944
Ecad MO CO	Complete Overlap	h8b2	12.32	176.968	10.315	904.263	19.944
Ecad MO CO	Complete Overlap	h8b2	12.32	172.094	1.37	771.298	19.944
Ecad MO CO	Complete Overlap	h8b2	12.32	156.505	7.118	796.587	19.944
Ecad MO CO	Complete Overlap	h8b2	13.509	189.437	16.836	1662.16	21.877
Ecad MO CO	Complete Overlap	h8b2	13.509	133.071	2.145	858.211	21.877
Ecad MO CO	Complete Overlap	h8b2	13.509	111.988	1.752	442.649	21.877
Ecad MO CO	Complete Overlap	h8b2	13.509	86.352	1.158	472.73	21.877
Ecad MO CO	Complete Overlap	h8b2	13.509	66.992	0.197	373.687	21.877
Ecad MO CO	Complete Overlap
Ecad MO CO	Complete Overlap	h8b3	7.835	151.515	6.036	816.642	12.652
Ecad MO CO	Complete Overlap	h8b3	7.835	103.297	1.529	392.384	12.652
Ecad MO CO	Complete Overlap	h8b3	7.835	66.514	2.066	415.648	12.652
Ecad MO CO	Complete Overlap	h8b3	7.835	44.847	0.083	217.964	12.652
Ecad MO CO	Complete Overlap	h8b3	7.835	37.771	0.022	239.171	12.652
Ecad MO CO	Complete Overlap	h8b3	7.835	30.649	0	268.092	12.652
Ecad MO CO	Complete Overlap
Ecad MO CO	Complete Overlap	h8b4	8.537	165.234	3.283	1751.257	13.794
Ecad MO CO	Complete Overlap	h8b4	8.537	140.613	0.373	1049.101	13.794
Ecad MO CO	Complete Overlap	h8b4	8.537	79.318	1.173	416.667	13.794
Ecad MO CO	Complete Overlap	h8b4	8.537	65.163	0.285	341.331	13.794
Ecad MO CO	Complete Overlap	h8b4	8.537	51.873	0.142	272.456	13.794
Ecad MO CO	Complete Overlap
Ecad MO CO	Complete Overlap	h8b5	6.754	166.801	30.957	659.434	10.894
Ecad MO CO	Complete Overlap	h8b5	6.754	156.406	15.228	541.465	10.894
Ecad MO CO	Complete Overlap	h8b5	6.754	134.734	9.716	796.87	10.894
Ecad MO CO	Complete Overlap	h8b5	6.754	110.525	1.786	770.966	10.894
Ecad MO CO	Complete Overlap	h8b5	6.754	95.131	1.728	490.493	10.894
Ecad MO CO	Complete Overlap	h8b5	6.754	77.436	1.795	355.804	10.894
Ecad MO CO	Complete Overlap	h8b5	6.754	53.51	0.145	261.195	10.894
Ecad MO CO	Complete Overlap
Ecad MO CO	Complete Overlap	h8b6	10.645	141.27	2.689	538.767	17.22
Ecad MO CO	Complete Overlap	h8b6	10.645	148.852	3.897	911.409	17.22
Ecad MO CO	Complete Overlap	h8b6	10.645	114.552	6.004	622.304	17.22
Ecad MO CO	Complete Overlap	h8b6	10.645	89.64	3.031	317.831	17.22
Ecad MO CO	Complete Overlap	h8b6	10.645	78.349	3.526	316.336	17.22
Ecad MO CO	Complete Overlap	h8b6	10.645	69.752	2.229	308.218	17.22
Ecad MO CO	Complete Overlap	h8b6	10.645	61.138	1.46	315.17	17.22
Ecad MO CO	Complete Overlap	h8b6	10.645	59.401	0.025	420.733	17.22
Ecad MO CO	Complete Overlap
Ecad MO CO	Complete Overlap	h8b7	10.645	166.272	15.748	679.62	17.22
Ecad MO CO	Complete Overlap	h8b7	10.645	153.888	4.307	697.133	17.22
Ecad MO CO	Complete Overlap	h8b7	10.645	140.217	5.91	973.665	17.22
Ecad MO CO	Complete Overlap	h8b7	10.645	124.048	3.774	653.673	17.22
Ecad MO CO	Complete Overlap	h8b7	10.645	110.127	10.184	477.937	17.22
Ecad MO CO	Complete Overlap	h8b7	10.645	96.994	5.716	465.009	17.22
Ecad MO CO	Complete Overlap
Ecad MO CO	Complete Overlap	h8b8	9.348	140.381	6.996	650.802	15.112
Ecad MO CO	Complete Overlap	h8b8	9.348	175.132	3.346	1141.495	15.112
Ecad MO CO	Complete Overlap	h8b8	9.348	163.926	6.092	771.662	15.112
Ecad MO CO	Complete Overlap	h8b8	9.348	138.742	6.581	586.022	15.112
Ecad MO CO	Complete Overlap	h8b8	9.348	104.803	13.592	574.903	15.112
Ecad MO CO	Complete Overlap	h8b8	9.348	89.403	5.539	479.206	15.112
Ecad MO PO	Partial Overlap	h8b1	8.645	319.738	48.532	2369.244	13.97
Ecad MO PO	Partial Overlap	h8b1	8.645	266.577	34.207	1958.281	13.97
Ecad MO PO	Partial Overlap	h8b1	8.645	190.768	4.014	1097.002	13.97
Ecad MO PO	Partial Overlap	h8b1	8.645	121.895	1.408	735.412	13.97
Ecad MO PO	Partial Overlap
Ecad MO PO	Partial Overlap	h8b2	9.132	417.632	47.142	3301.765	14.76
Ecad MO PO	Partial Overlap	h8b2	9.132	379.192	46.197	2003.552	14.76
Ecad MO PO	Partial Overlap	h8b2	9.132	273.006	11.179	1214.425	14.76
Ecad MO PO	Partial Overlap	h8b2	9.132	195.096	10.05	1154.388	14.76
Ecad MO PO	Partial Overlap	h8b2	9.132	146.885	10.392	1972.942	14.76
Ecad MO PO	Partial Overlap	h8b2	9.132	95.104	2.711	1242.51	14.76
Ecad MO PO	Partial Overlap
Ecad MO PO	Partial Overlap	h8b3	10.321	405.458	27.052	2065.454	16.693
Ecad MO PO	Partial Overlap	h8b3	10.321	356.765	41.748	1759.557	16.693
Ecad MO PO	Partial Overlap	h8b3	11.131	358.286	44.921	3216.925	18.011
Ecad MO PO	Partial Overlap	h8b3	11.131	271.738	37.779	1016.848	18.011
Ecad MO PO	Partial Overlap	h8b3	11.131	216.266	31.056	1613.334	18.011
Ecad MO PO	Partial Overlap	h8b3	11.131	185.198	24.163	1873.825	18.011
Ecad MO PO	Partial Overlap	h8b3	11.131	169.252	7.663	1975.123	18.011
Ecad MO PO	Partial Overlap
Ecad MO PO	Partial Overlap	h8b4	10.699	520.934	58.158	2483.771	17.308
Ecad MO PO	Partial Overlap	h8b4	10.699	476.627	71.069	4071.975	17.308
Ecad MO PO	Partial Overlap	h8b4	10.699	328.948	45.042	2695.664	17.308
Ecad MO PO	Partial Overlap	h8b4	10.699	245.249	13.961	2401.222	17.308
Ecad MO PO	Partial Overlap	h8b4	10.699	197.131	19.444	1399.733	17.308
Ecad MO PO	Partial Overlap	h8b4	10.699	150.827	5.046	582.898	17.308
Ecad MO PO	Partial Overlap
Ecad MO PO	Partial Overlap	h8b5	18.966	382.116	10.963	1999.739	30.75
Ecad MO PO	Partial Overlap	h8b5	18.966	387.771	19.863	3098.475	30.75
Ecad MO PO	Partial Overlap	h8b5	18.966	384.502	19.961	3399.476	30.75
Ecad MO PO	Partial Overlap	h8b5	18.966	353.124	27.055	3577.486	30.75
Ecad MO PO	Partial Overlap	h8b5	18.966	243.803	10.959	2425.718	30.75
Ecad MO PO	Partial Overlap	h8b5	18.966	146.501	3.335	644.533	30.75
Ecad MO PO	Partial Overlap	h8b5	18.966	114.963	0.722	3663.782	30.75
Ecad MO PO	Partial Overlap
Ecad MO PO	Partial Overlap	h8b6	12.482	402.77	53.29	2894.124	20.207
Ecad MO PO	Partial Overlap	h8b6	12.482	396.31	59.284	2390.547	20.207
Ecad MO PO	Partial Overlap	h8b6	12.482	291.583	29.268	1122.864	20.207
Ecad MO PO	Partial Overlap	h8b6	12.482	235.079	29.513	904.347	20.207
Ecad MO PO	Partial Overlap
Ecad MO PO	Partial Overlap	h8b9	13.563	323.429	15.88	4095	21.965
Ecad MO PO	Partial Overlap	h8b9	13.563	308.842	16.509	4095	21.965
Ecad MO PO	Partial Overlap	h8b9	13.563	284.024	17.603	3581.533	21.965
Ecad MO PO	Partial Overlap	h8b9	13.563	237.914	24.034	1662.88	21.965
Ecad MO PO	Partial Overlap	h8b9	13.563	184.865	4.603	1811.249	21.965
Ecad MO PO	Partial Overlap	h8b9	13.563	151.352	5.896	1043.291	21.965
Ecad MO PO	Partial Overlap
Ecad MO PO	Partial Overlap	h8b10	10.212	433.773	14.887	2981.996	16.507
Ecad MO PO	Partial Overlap	h8b10	10.212	401.201	53.098	1424.977	16.507
Ecad MO PO	Partial Overlap	h8b10	10.212	362.144	16.883	1351.373	16.507
Ecad MO PO	Partial Overlap	h8b10	10.212	297.157	13.915	2127.807	16.507
Ecad MO PO	Partial Overlap	h8b10	10.212	276.866	8.333	1337.729	16.507
Ecad MO PO	Partial Overlap	h8b10	10.212	262.883	1.325	1349.709	16.507
Ecad MO PO	Partial Overlap	h8b10	10.212	237.013	6.044	1496.741	16.507
Ecad MO NO	No Overlap	h8b1	8.862	586.585	78.286	3041.286	14.32
Ecad MO NO	No Overlap	h8b1	8.862	514.818	37.586	1597.403	14.32
Ecad MO NO	No Overlap	h8b1	8.862	387.079	34.76	1759.597	14.32
Ecad MO NO	No Overlap	h8b1	8.862	291.456	14.617	1535.26	14.32
Ecad MO NO	No Overlap	h8b1	8.862	200.96	21.359	847.893	14.32
Ecad MO NO	No Overlap
Ecad MO NO	No Overlap	h8b2	11.293	563.18	92.112	4046.257	18.275
Ecad MO NO	No Overlap	h8b2	11.293	595.063	54.626	4094.674	18.275
Ecad MO NO	No Overlap	h8b2	11.293	517.453	25.478	3115.357	18.275
Ecad MO NO	No Overlap	h8b2	11.293	458.816	62.982	2439.473	18.275
Ecad MO NO	No Overlap	h8b2	11.293	379.731	31.098	1407.234	18.275
Ecad MO NO	No Overlap	h8b2	11.293	295.782	29.652	2972.769	18.275
Ecad MO NO	No Overlap	h8b2	11.293	238.046	8.074	3248.674	18.275
Ecad MO NO	No Overlap
Ecad MO NO	No Overlap	h8b3	15.238	392.673	33.216	3144.562	24.688
Ecad MO NO	No Overlap	h8b3	15.238	401.487	25.786	3626.365	24.688
Ecad MO NO	No Overlap	h8b3	15.238	332.393	30.606	4095	24.688
Ecad MO NO	No Overlap	h8b3	15.238	263.33	13.911	4094.821	24.688
Ecad MO NO	No Overlap	h8b3	15.238	210.571	22.452	3812.269	24.688
Ecad MO NO	No Overlap
Ecad MO NO	No Overlap	h8b4	6.43	448.665	43.672	3843.666	10.367
Ecad MO NO	No Overlap	h8b4	6.43	304.594	16.969	2164.64	10.367
Ecad MO NO	No Overlap	h8b4	6.43	239.569	9.588	3113.92	10.367
Ecad MO NO	No Overlap	h8b4	6.43	197.906	3.784	2216.926	10.367
Ecad MO NO	No Overlap	h8b4	6.43	191.064	0.906	3540.825	10.367
