# Supplementary material for: Stepwise polarisation of developing bilayered epidermis is mediated by aPKC and E-cadherin in zebrafish
Source: eLife. 2020 Jan 22;9:e49064. doi: 10.7554/eLife.49064 (PMC6975926; doi:10.7554/eLife.49064)
Supplement: Figure 4—figure supplement 2—source data 7. [file elife-49064-fig4-figsupp2-data7.csv]

Genotype	Boundary	Cell name	Area	Mean	Min	Max	Length
Ctrl MO CO	Complete Overlap	h2b1	6.106	405.144	51.938	1084.676	9.84
Ctrl MO CO	Complete Overlap	h2b1	6.106	629.467	169.989	1905.726	9.84
Ctrl MO CO	Complete Overlap	h2b1	6.106	695.385	158.869	2183.572	9.84
Ctrl MO CO	Complete Overlap	h2b1	6.106	727.531	155.587	2343.696	9.84
Ctrl MO CO	Complete Overlap	h2b1	6.106	681.232	120.083	2403.676	9.84
Ctrl MO CO	Complete Overlap	h2b1	6.106	556.974	82.917	1713.448	9.84
Ctrl MO CO	Complete Overlap
Ctrl MO CO	Complete Overlap	h2b2	8.754	561.374	119.523	1909.252	14.145
Ctrl MO CO	Complete Overlap	h2b2	8.754	552.91	136.873	2003.99	14.145
Ctrl MO CO	Complete Overlap	h2b2	8.754	511.533	136.789	2196.758	14.145
Ctrl MO CO	Complete Overlap	h2b2	7.781	699.134	166.378	2095.409	12.564
Ctrl MO CO	Complete Overlap	h2b2	7.781	623.05	203.387	1802.289	12.564
Ctrl MO CO	Complete Overlap	h2b2	7.781	559.184	130.671	1581.216	12.564
Ctrl MO CO	Complete Overlap
Ctrl MO CO	Complete Overlap	h2b3	3.674	408.84	29.501	1244.797	5.887
Ctrl MO CO	Complete Overlap	h2b3	3.674	516.589	38.647	1720.667	5.887
Ctrl MO CO	Complete Overlap	h2b3	3.674	647.79	87.397	2037.078	5.887
Ctrl MO CO	Complete Overlap	h2b3	3.674	652.338	119.983	1766.825	5.887
Ctrl MO CO	Complete Overlap	h2b3	3.674	580.075	140.964	2310.622	5.887
Ctrl MO CO	Complete Overlap	h2b3	3.674	565.176	127.251	1742.092	5.887
Ctrl MO CO	Complete Overlap
Ctrl MO CO	Complete Overlap	h2b4	12.644	220.814	19.177	1100.215	20.471
Ctrl MO CO	Complete Overlap	h2b4	12.644	282.072	12.826	1700.817	20.471
Ctrl MO CO	Complete Overlap	h2b4	12.644	336.484	35.346	1686.973	20.471
Ctrl MO CO	Complete Overlap	h2b4	12.59	458.856	76.338	1579.104	20.383
Ctrl MO CO	Complete Overlap	h2b4	12.59	535.368	91.085	2009.148	20.383
Ctrl MO CO	Complete Overlap	h2b4	12.59	551.44	86.986	2140.66	20.383
Ctrl MO CO	Complete Overlap
Ctrl MO CO	Complete Overlap	h2b5	7.565	142.94	2.136	580.428	12.183
Ctrl MO CO	Complete Overlap	h2b5	7.565	212.701	18.244	815.219	12.183
Ctrl MO CO	Complete Overlap	h2b5	7.565	296.818	39.671	1158.622	12.183
Ctrl MO CO	Complete Overlap	h2b5	7.565	408.378	43.95	1491.228	12.183
Ctrl MO CO	Complete Overlap	h2b5	7.565	487.457	52.841	2048.094	12.183
Ctrl MO CO	Complete Overlap	h2b5	7.565	423.64	53.418	3042.845	12.183
Ctrl MO CO	Complete Overlap	h2b5	7.565	313.868	49.71	2318.063	12.183
Ctrl MO CO	Complete Overlap
Ctrl MO CO	Complete Overlap	h2b6	10.861	97.69	7.533	450.269	17.572
Ctrl MO CO	Complete Overlap	h2b6	10.861	248.924	12.113	849.198	17.572
Ctrl MO CO	Complete Overlap	h2b6	10.861	323.992	36.195	1063.083	17.572
Ctrl MO CO	Complete Overlap	h2b6	10.861	370.599	56.102	1317.323	17.572
Ctrl MO CO	Complete Overlap	h2b6	10.861	367.403	54.86	1401.027	17.572
Ctrl MO CO	Complete Overlap	h2b6	11.293	598.029	119.506	1577.914	18.275
Ctrl MO CO	Complete Overlap	h2b6	11.293	570.026	116.099	1707.169	18.275
Ctrl MO CO	Complete Overlap	h2b6	11.293	489.118	103.132	1461.553	18.275
Ctrl MO CO	Complete Overlap
Ctrl MO CO	Complete Overlap	h2b7	7.403	140.612	10.578	509.938	11.949
Ctrl MO CO	Complete Overlap	h2b7	7.403	257.699	21.222	789.852	11.949
Ctrl MO CO	Complete Overlap	h2b7	7.403	292.051	35.586	1127.691	11.949
Ctrl MO CO	Complete Overlap	h2b7	7.403	319.14	27.459	1406.028	11.949
Ctrl MO CO	Complete Overlap	h2b7	7.997	540.038	103.878	1690.323	12.915
Ctrl MO CO	Complete Overlap	h2b7	7.997	470.21	110.054	1393.54	12.915
Ctrl MO CO	Complete Overlap
Ctrl MO CO	Complete Overlap	h2b8	7.295	384.333	44.083	1271.693	11.773
Ctrl MO CO	Complete Overlap	h2b8	7.295	478.43	70.069	1727.134	11.773
Ctrl MO CO	Complete Overlap	h2b8	7.295	613.189	126.387	2638.452	11.773
Ctrl MO CO	Complete Overlap	h2b8	7.295	756.474	38.444	2870.723	11.773
Ctrl MO CO	Complete Overlap	h2b8	7.295	830.423	183.017	4095	11.773
Ctrl MO CO	Complete Overlap	h2b8	7.295	726.83	134.542	3655.306	11.773
Ctrl MO CO	Complete Overlap
Ctrl MO CO	Complete Overlap	h2b9	12.158	254.665	28.894	1209.393	19.673
Ctrl MO CO	Complete Overlap	h2b9	12.158	331.244	44.351	1335.068	19.673
Ctrl MO CO	Complete Overlap	h2b9	12.158	436.161	102.295	1799.36	19.673
Ctrl MO CO	Complete Overlap	h2b9	12.158	522.409	94.207	2349.804	19.673
Ctrl MO CO	Complete Overlap	h2b9	12.05	665.191	76.02	2762.04	19.494
Ctrl MO CO	Complete Overlap	h2b9	12.05	627.205	128.393	2410.554	19.494
Ctrl MO CO	Complete Overlap	h2b9	12.05	569.72	86.442	2246.558	19.494
Ctrl MO CO	Complete Overlap	h2b9	12.05	514.775	52.724	2499.876	19.494
Ctrl MO CO	Complete Overlap	h2b9	12.05	423.652	26.055	2160.949	19.494
Ctrl MO CO	Complete Overlap
Ctrl MO CO	Complete Overlap	h2b10	13.941	94.004	1.151	352.068	22.571
Ctrl MO CO	Complete Overlap	h2b10	13.941	149.019	5.594	482.83	22.571
Ctrl MO CO	Complete Overlap	h2b10	13.941	245.626	1.579	843.478	22.571
Ctrl MO CO	Complete Overlap	h2b10	13.941	295.94	6.72	1389.752	22.571
Ctrl MO CO	Complete Overlap	h2b10	13.941	288.305	46.489	1251.692	22.571
Ctrl MO CO	Complete Overlap	h2b10	14.319	558.387	88.084	2120.959	23.191
Ctrl MO CO	Complete Overlap	h2b10	14.319	561.944	97.851	1973.991	23.191
Ctrl MO CO	Complete Overlap	h2b10	14.319	463.831	89.952	2439.317	23.191
Ctrl MO CO	Complete Overlap
Ctrl MO CO	Complete Overlap	h2b11	5.674	190.049	13.695	509.802	9.137
Ctrl MO CO	Complete Overlap	h2b11	5.674	298.625	20.013	1080.104	9.137
Ctrl MO CO	Complete Overlap	h2b11	5.674	438.146	43.439	1873.113	9.137
Ctrl MO CO	Complete Overlap	h2b11	5.674	472.789	105.134	1580.245	9.137
Ctrl MO CO	Complete Overlap	h2b11	5.674	503.843	90.758	1859.916	9.137
Ctrl MO CO	Complete Overlap	h2b11	5.674	456.783	82.88	1474.287	9.137
Ctrl MO CO	Complete Overlap	h2b11	5.674	325.846	60.055	1103.722	9.137
Ctrl MO CO	Complete Overlap
Ctrl MO CO	Complete Overlap	h2b12	9.132	146.878	5.687	570.343	14.76
Ctrl MO CO	Complete Overlap	h2b12	9.132	265.423	14.914	763.277	14.76
Ctrl MO CO	Complete Overlap	h2b12	9.132	345.043	32.385	1659.944	14.76
Ctrl MO CO	Complete Overlap	h2b12	9.132	369.32	35.131	1919.413	14.76
Ctrl MO CO	Complete Overlap	h2b12	9.132	420.598	59.192	1569.583	14.76
Ctrl MO CO	Complete Overlap	h2b12	9.132	467.439	80.751	2398.444	14.76
Ctrl MO CO	Complete Overlap	h2b12	9.132	416.474	81.207	1662.89	14.76
Ctrl MO CO	Complete Overlap
Ctrl MO CO	Complete Overlap	h2b13	4.431	85.097	0.322	224.696	7.116
Ctrl MO CO	Complete Overlap	h2b13	4.431	176.649	13.707	586.41	7.116
Ctrl MO CO	Complete Overlap	h2b13	4.431	281.274	55.324	1500.169	7.116
Ctrl MO CO	Complete Overlap	h2b13	4.431	332.071	54.094	1727.065	7.116
Ctrl MO CO	Complete Overlap	h2b13	4.431	420.512	101.627	1455.678	7.116
Ctrl MO CO	Complete Overlap	h2b13	4.431	590.079	148.788	1534.478	7.116
Ctrl MO CO	Complete Overlap	h3b1	12.698	489.895	50.044	2480.182	20.559
Ctrl MO CO	Complete Overlap	h3b1	12.698	440.339	56.873	2286.776	20.559
Ctrl MO CO	Complete Overlap	h3b1	12.698	374.062	46.83	1804.008	20.559
Ctrl MO CO	Complete Overlap	h3b1	12.698	253.813	41.199	1204.419	20.559
Ctrl MO CO	Complete Overlap	h3b1	12.698	175.107	3.185	2004.52	20.559
Ctrl MO CO	Complete Overlap
Ctrl MO CO	Complete Overlap	h3b2	16.643	315.836	20.586	894.952	26.972
Ctrl MO CO	Complete Overlap	h3b2	16.643	298.305	16.764	1335.489	26.972
Ctrl MO CO	Complete Overlap	h3b2	16.643	258.589	9.135	1370.685	26.972
Ctrl MO CO	Complete Overlap	h3b2	16.643	170.433	0.587	716.848	26.972
Ctrl MO CO	Complete Overlap	h3b2	16.643	102.719	0.049	634.493	26.972
Ctrl MO CO	Complete Overlap
Ctrl MO CO	Complete Overlap	h3b3	4.377	300.968	50.202	1635.072	7.029
Ctrl MO CO	Complete Overlap	h3b3	4.377	262.898	31.439	1901.462	7.029
Ctrl MO CO	Complete Overlap	h3b3	4.377	222.557	14.983	1534.228	7.029
Ctrl MO CO	Complete Overlap	h3b3	4.377	146.207	11.788	494.996	7.029
Ctrl MO CO	Complete Overlap	h3b4	7.943	165.478	3.697	920.151	12.827
Ctrl MO CO	Complete Overlap	h3b4	7.943	155.147	10.256	1247.877	12.827
Ctrl MO CO	Complete Overlap	h3b4	7.727	346.05	43.053	1321.873	12.476
Ctrl MO CO	Complete Overlap	h3b4	7.727	384.98	43.786	1455.711	12.476
Ctrl MO CO	Complete Overlap	h3b4	7.727	308.034	24.86	888.995	12.476
Ctrl MO CO	Complete Overlap
Ctrl MO CO	Complete Overlap	h3b5	5.241	182.808	11.396	660.588	8.434
Ctrl MO CO	Complete Overlap	h3b5	5.241	240.203	6.86	1163.124	8.434
Ctrl MO CO	Complete Overlap	h3b5	5.241	261.452	16.958	1243.217	8.434
Ctrl MO CO	Complete Overlap	h3b5	5.241	314.16	28.021	968.855	8.434
Ctrl MO CO	Complete Overlap	h3b5	5.241	383.073	2.236	1011.167	8.434
Ctrl MO CO	Complete Overlap	h4b1	16.156	243.92	13.351	904.555	26.182
Ctrl MO CO	Complete Overlap	h4b1	16.156	389.908	31.755	1508.188	26.182
Ctrl MO CO	Complete Overlap	h4b1	16.156	461.767	53.546	1471.079	26.182
Ctrl MO CO	Complete Overlap	h4b1	16.156	498.438	71.578	1624.873	26.182
Ctrl MO CO	Complete Overlap	h4b1	16.156	490.388	48.041	2979.014	26.182
Ctrl MO CO	Complete Overlap	h4b1	16.156	327.148	15.716	1400.108	26.182
Ctrl MO CO	Complete Overlap	h4b1	16.156	184.406	19.58	1010.982	26.182
Ctrl MO CO	Complete Overlap
Ctrl MO CO	Complete Overlap	h4b2	6.592	457.078	71.168	1506.346	10.631
Ctrl MO CO	Complete Overlap	h4b2	6.592	545.769	117.686	1781.261	10.631
Ctrl MO CO	Complete Overlap	h4b2	6.592	568.371	105.082	2325.924	10.631
Ctrl MO CO	Complete Overlap	h4b2	6.592	563.325	69.316	2111.511	10.631
Ctrl MO CO	Complete Overlap	h4b2	6.592	417.349	71.302	3018.415	10.631
Ctrl MO CO	Complete Overlap
Ctrl MO CO	Complete Overlap	h4b3	8.105	260.025	16.483	972.737	13.09
Ctrl MO CO	Complete Overlap	h4b3	8.105	372.508	51.31	2080.338	13.09
Ctrl MO CO	Complete Overlap	h4b3	8.105	375.081	41.806	1978.191	13.09
Ctrl MO CO	Complete Overlap	h4b3	8.429	535.523	135.071	1514.341	13.616
Ctrl MO CO	Complete Overlap	h4b3	8.429	501.038	64.823	1472.136	13.616
Ctrl MO CO	Complete Overlap	h4b3	8.429	333.04	34.67	1162.59	13.616
Ctrl MO CO	Complete Overlap	h5b1	9.996	205.506	6.147	788.044	16.166
Ctrl MO CO	Complete Overlap	h5b1	9.996	297.361	37.978	1191.377	16.166
Ctrl MO CO	Complete Overlap	h5b1	9.996	432.929	24.642	1570.99	16.166
Ctrl MO CO	Complete Overlap	h5b1	9.996	549.135	32.542	1667.964	16.166
Ctrl MO CO	Complete Overlap	h5b1	9.996	568.219	50.685	2007.142	16.166
Ctrl MO CO	Complete Overlap	h5b1	9.996	580.708	96.75	2924.281	16.166
Ctrl MO CO	Complete Overlap	h5b1	9.996	556.09	82.214	2758.501	16.166
Ctrl MO CO	Complete Overlap
Ctrl MO CO	Complete Overlap	h5b2	8.213	275.43	38.383	1290.081	13.263
Ctrl MO CO	Complete Overlap	h5b2	8.213	415.345	22.75	1575.376	13.263
Ctrl MO CO	Complete Overlap	h5b2	8.213	548.022	85.736	2292.895	13.263
Ctrl MO CO	Complete Overlap	h5b2	8.213	624.054	121.633	2195.814	13.263
Ctrl MO CO	Complete Overlap	h5b2	8.213	559.619	98.567	2424.758	13.263
Ctrl MO CO	Complete Overlap
Ctrl MO CO	Complete Overlap	h5b3	8.213	275.43	38.383	1290.081	13.263
Ctrl MO CO	Complete Overlap	h5b3	8.213	415.345	22.75	1575.376	13.263
Ctrl MO CO	Complete Overlap	h5b3	8.213	548.022	85.736	2292.895	13.263
Ctrl MO CO	Complete Overlap	h5b3	8.213	624.054	121.633	2195.814	13.263
Ctrl MO CO	Complete Overlap	h5b3	8.213	559.619	98.567	2424.758	13.263
Ctrl MO CO	Complete Overlap	h5b3	8.375	198.087	7.195	649.839	13.53
Ctrl MO CO	Complete Overlap	h5b3	8.375	276.874	10.763	966.226	13.53
Ctrl MO CO	Complete Overlap	h5b3	8.375	341.223	33.828	1358.566	13.53
Ctrl MO CO	Complete Overlap	h5b3	8.375	382.418	38.12	1727.863	13.53
Ctrl MO CO	Complete Overlap	h5b3	8.321	385.364	58.892	1587.335	13.442
Ctrl MO CO	Complete Overlap	h5b3	8.321	475.537	72.421	1863.997	13.442
Ctrl MO CO	Complete Overlap	h5b3	8.321	489.499	46.947	1593.123	13.442
Ctrl MO CO	Complete Overlap
Ctrl MO CO	Complete Overlap	h5b4	11.347	174.278	13.135	826.488	18.362
Ctrl MO CO	Complete Overlap	h5b4	11.347	269.078	3.47	1867.557	18.362
Ctrl MO CO	Complete Overlap	h5b4	11.347	360.754	30.744	2460.772	18.362
Ctrl MO CO	Complete Overlap	h5b4	11.347	464.524	49.356	3089.558	18.362
Ctrl MO CO	Complete Overlap	h5b4	11.347	523.889	67.729	2409.938	18.362
Ctrl MO CO	Complete Overlap	h5b4	11.347	505.808	83.52	1805.63	18.362
Ctrl MO CO	Complete Overlap	h5b4	11.347	486.893	81.718	2095.193	18.362
Ctrl MO CO	Complete Overlap
Ctrl MO CO	Complete Overlap	h5b5	6.808	406.835	95.773	1172.143	10.982
Ctrl MO CO	Complete Overlap	h5b5	6.808	536.527	119.365	1639.973	10.982
Ctrl MO CO	Complete Overlap	h5b5	6.808	732.876	182.517	2255.276	10.982
Ctrl MO CO	Complete Overlap	h5b5	6.808	759.152	155.953	1805.589	10.982
Ctrl MO CO	Complete Overlap	h5b5	6.808	689.022	153.985	2007.39	10.982
Ctrl MO CO	Complete Overlap	h5b5	6.808	641.202	153.494	1669.484	10.982
Ctrl MO CO	Complete Overlap	h5b5	6.808	552.166	66.654	1608.682	10.982
Ctrl MO CO	Complete Overlap
Ctrl MO CO	Complete Overlap	h5b6	9.618	366.908	67.095	1021.321	15.551
Ctrl MO CO	Complete Overlap	h5b6	9.618	518.963	116.87	1355.87	15.551
Ctrl MO CO	Complete Overlap	h5b6	9.618	598.097	175.767	2461.299	15.551
Ctrl MO CO	Complete Overlap	h5b6	8.7	694.081	76.634	3939.535	14.057
Ctrl MO CO	Complete Overlap	h5b6	8.7	688.124	105.093	3837.088	14.057
Ctrl MO CO	Complete Overlap	h5b6	8.7	531.525	79.986	2108.759	14.057
Ctrl MO CO	Complete Overlap
Ctrl MO CO	Complete Overlap	h5b7	9.402	200.577	31.264	554.402	15.199
Ctrl MO CO	Complete Overlap	h5b7	9.402	339.574	69.359	1003.214	15.199
Ctrl MO CO	Complete Overlap	h5b7	9.402	465.191	81.031	1629.619	15.199
Ctrl MO CO	Complete Overlap	h5b7	9.402	526.053	67.477	2124.908	15.199
Ctrl MO CO	Complete Overlap	h5b7	9.24	534.802	70.623	2023.194	14.936
Ctrl MO CO	Complete Overlap	h5b7	9.24	552.281	107.072	2211.406	14.936
Ctrl MO CO	Complete Overlap	h5b7	9.24	499.756	118.546	1449.46	14.936
Ctrl MO CO	Complete Overlap	h5b7	9.24	417.286	90.199	1747.375	14.936
Ctrl MO CO	Complete Overlap
Ctrl MO CO	Complete Overlap	h5b8	12.968	148.971	13.15	523.142	20.998
Ctrl MO CO	Complete Overlap	h5b8	12.968	229.451	28.03	680.359	20.998
Ctrl MO CO	Complete Overlap	h5b8	12.968	324.238	55.134	982.487	20.998
Ctrl MO CO	Complete Overlap	h5b8	12.968	493.521	85.766	2713.495	20.998
Ctrl MO CO	Complete Overlap	h5b8	12.968	756.279	95.739	2622.935	20.998
Ctrl MO CO	Complete Overlap	h5b8	12.968	760.34	106.302	3081.703	20.998
Ctrl MO CO	Complete Overlap	h5b8	12.968	681.181	113.918	2507.253	20.998
Ctrl MO CO	Complete Overlap	h5b8	12.968	545.404	86.602	3078.104	20.998
Ctrl MO CO	Complete Overlap
Ctrl MO CO	Complete Overlap	h5b9	9.942	294.976	17.416	1012.708	16.078
Ctrl MO CO	Complete Overlap	h5b9	9.942	433.166	30.459	1680.849	16.078
Ctrl MO CO	Complete Overlap	h5b9	9.942	581.897	56.822	2780.519	16.078
Ctrl MO CO	Complete Overlap	h5b9	9.942	666.863	84.392	3934.333	16.078
Ctrl MO CO	Complete Overlap	h5b9	9.888	862.797	95.131	3667.831	15.99
Ctrl MO CO	Complete Overlap	h5b9	9.888	750.804	67.019	3606.114	15.99
Ctrl MO CO	Complete Overlap
Ctrl MO CO	Complete Overlap	h5b10	12.86	189.103	12.401	628.273	20.822
Ctrl MO CO	Complete Overlap	h5b10	12.86	291.898	27.518	957.019	20.822
Ctrl MO CO	Complete Overlap	h5b10	12.86	413.825	34.118	1521.22	20.822
Ctrl MO CO	Complete Overlap	h5b10	12.86	529.577	49.505	3047.644	20.822
Ctrl MO CO	Complete Overlap	h5b10	12.86	525.714	88.704	2129.781	20.822
Ctrl MO CO	Complete Overlap	h5b10	12.86	496.656	40.411	2470.892	20.822
Ctrl MO CO	Complete Overlap	h5b10	12.86	439.925	64.198	1753.171	20.822
Ctrl MO CO	Complete Overlap	h5b10	12.86	365.636	26.001	3125.375	20.822
Ctrl MO CO	Complete Overlap
Ctrl MO CO	Complete Overlap	h5b11	9.348	156.982	4.944	585.681	15.112
Ctrl MO CO	Complete Overlap	h5b11	9.348	255.715	33.888	813.834	15.112
Ctrl MO CO	Complete Overlap	h5b11	9.348	365.227	25.578	1463.311	15.112
Ctrl MO CO	Complete Overlap	h5b11	9.348	485.273	79.909	2263.032	15.112
Ctrl MO CO	Complete Overlap	h5b11	9.348	607.336	93.374	1767.297	15.112
Ctrl MO CO	Complete Overlap	h5b11	9.348	603.865	79.147	1872.367	15.112
Ctrl MO CO	Complete Overlap	h5b11	9.348	537.943	108.625	1888.588	15.112
Ctrl MO CO	Complete Overlap	h5b11	9.348	377.655	55.15	1670.692	15.112
Ctrl MO CO	Complete Overlap
Ctrl MO CO	Complete Overlap	h5b12	11.293	263.928	32.536	1104.072	18.275
Ctrl MO CO	Complete Overlap	h5b12	11.293	347.283	41.347	1476.725	18.275
Ctrl MO CO	Complete Overlap	h5b12	11.293	423.189	40.741	1529.051	18.275
Ctrl MO CO	Complete Overlap	h5b12	11.293	522.942	57.727	3849.07	18.275
Ctrl MO CO	Complete Overlap	h5b12	11.293	530.702	67.931	4061.769	18.275
Ctrl MO CO	Complete Overlap	h5b12	11.293	512.886	87.453	3539.666	18.275
Ctrl MO CO	Complete Overlap	h5b12	11.293	427.135	23.718	2353.654	18.275
Ctrl MO CO	Complete Overlap
Ctrl MO CO	Complete Overlap	h5b13	9.618	318.591	19.779	1261.924	15.551
Ctrl MO CO	Complete Overlap	h5b13	9.618	426.152	19.393	2813.667	15.551
Ctrl MO CO	Complete Overlap	h5b13	9.618	563.618	28.19	3499.863	15.551
Ctrl MO CO	Complete Overlap	h5b13	9.618	723.607	65.065	3885.217	15.551
Ctrl MO CO	Complete Overlap	h5b13	9.618	687.432	46.954	3530.978	15.551
Ctrl MO CO	Complete Overlap	h5b13	9.618	554.286	57.896	3333.692	15.551
Ctrl MO CO	Complete Overlap	h5b13	9.618	428.942	75.122	4007.145	15.551
Ctrl MO CO	Complete Overlap
Ctrl MO CO	Complete Overlap	h5b14	4.593	269.083	38.012	913.599	7.371
Ctrl MO CO	Complete Overlap	h5b14	4.593	390.946	80.926	1162.761	7.371
Ctrl MO CO	Complete Overlap	h5b14	4.593	482.279	127.626	1827.773	7.371
Ctrl MO CO	Complete Overlap	h5b14	4.593	436.407	140.618	1297.475	7.371
Ctrl MO CO	Complete Overlap	h5b14	4.593	427.505	132.073	1243.681	7.371
Ctrl MO CO	Complete Overlap
Ctrl MO CO	Complete Overlap	h5b15	9.618	238.141	20.331	718.657	15.551
Ctrl MO CO	Complete Overlap	h5b15	9.618	368.441	44.533	1467.019	15.551
Ctrl MO CO	Complete Overlap	h5b15	9.618	503.796	93.349	2619.682	15.551
Ctrl MO CO	Complete Overlap	h5b15	9.618	615.486	130.129	2625.939	15.551
Ctrl MO CO	Complete Overlap	h5b15	9.618	571.736	92.455	2564.548	15.551
Ctrl MO CO	Complete Overlap	h5b15	9.618	439.341	85.252	2553.701	15.551
Ctrl MO CO	Complete Overlap	h5b15	9.618	321.157	18.255	1616.356	15.551
Ctrl MO CO	Complete Overlap	h6b1	9.348	483.73	32.408	1830.824	15.112
Ctrl MO CO	Complete Overlap	h6b1	9.348	551.526	54.22	2274.644	15.112
Ctrl MO CO	Complete Overlap	h6b1	9.348	617.134	86.208	2326.672	15.112
Ctrl MO CO	Complete Overlap	h6b1	9.348	600.277	158.394	1946.174	15.112
Ctrl MO CO	Complete Overlap	h6b1	9.348	435.962	71.884	1597.461	15.112
Ctrl MO CO	Complete Overlap
Ctrl MO CO	Complete Overlap	h6b2	9.996	440.874	89.265	2135.701	16.166
Ctrl MO CO	Complete Overlap	h6b2	9.996	547.057	99.764	2554.799	16.166
Ctrl MO CO	Complete Overlap	h6b2	9.996	700.461	138.451	2375.599	16.166
Ctrl MO CO	Complete Overlap	h6b2	9.996	772.262	91.29	3582.299	16.166
Ctrl MO CO	Complete Overlap	h6b2	9.996	590.674	84.029	2197.732	16.166
Ctrl MO CO	Complete Overlap	h6b2	9.996	442.126	28.216	3052.466	16.166
Ctrl MO CO	Complete Overlap
Ctrl MO CO	Complete Overlap	h6b3	12.698	375.188	49.324	1616.894	20.559
Ctrl MO CO	Complete Overlap	h6b3	12.698	422.129	45.821	1754.18	20.559
Ctrl MO CO	Complete Overlap	h6b3	12.698	484.026	50.922	1941.973	20.559
Ctrl MO CO	Complete Overlap	h6b3	12.698	543.699	63.391	1980.481	20.559
Ctrl MO CO	Complete Overlap	h6b3	12.698	541.725	57.657	2419.332	20.559
Ctrl MO CO	Complete Overlap	h6b3	12.698	470.068	21.296	2377.919	20.559
Ctrl MO CO	Complete Overlap	h6b3	12.698	380.205	28.203	2412.189	20.559
Ctrl MO CO	Complete Overlap
Ctrl MO CO	Complete Overlap	h6b4	6.484	345.205	38.969	1177.996	10.455
Ctrl MO CO	Complete Overlap	h6b4	6.484	451.416	43.867	1675.537	10.455
Ctrl MO CO	Complete Overlap	h6b4	6.484	586.459	74.35	2050.826	10.455
Ctrl MO CO	Complete Overlap	h6b4	6.484	677.115	77.865	2055.215	10.455
Ctrl MO CO	Complete Overlap	h6b4	6.484	617.879	47.054	2522.656	10.455
Ctrl MO CO	Complete Overlap
Ctrl MO CO	Complete Overlap	h6b5	7.241	467.444	69.599	2304.491	11.685
Ctrl MO CO	Complete Overlap	h6b5	7.241	568.76	90.028	2299.308	11.685
Ctrl MO CO	Complete Overlap	h6b5	7.241	633.641	125.579	2083.293	11.685
Ctrl MO CO	Complete Overlap	h6b5	7.241	606.874	102.23	2378.594	11.685
Ctrl MO CO	Complete Overlap	h6b5	7.241	516.357	62.294	1689.979	11.685
Ctrl MO CO	Complete Overlap	h6b5	7.241	385.563	49.529	1493.988	11.685
Ctrl MO CO	Complete Overlap
Ctrl MO CO	Complete Overlap	h6b6	7.187	277.059	61.609	949.447	11.597
Ctrl MO CO	Complete Overlap	h6b6	7.187	463.952	80.246	1432.073	11.597
Ctrl MO CO	Complete Overlap	h6b6	7.187	504.556	68.85	1457.756	11.597
Ctrl MO CO	Complete Overlap	h6b6	7.187	519.486	107.892	2297.887	11.597
Ctrl MO CO	Complete Overlap	h6b6	7.187	478.284	116.566	1739.635	11.597
Ctrl MO CO	Complete Overlap	h6b6	7.187	370.91	52.162	2228.992	11.597
Ctrl MO CO	Complete Overlap
Ctrl MO CO	Complete Overlap	h6b7	8.267	220.047	19.851	871.199	13.354
Ctrl MO CO	Complete Overlap	h6b7	8.267	337.868	36.16	1416.664	13.354
Ctrl MO CO	Complete Overlap	h6b7	8.267	373.209	81.2	1334.859	13.354
Ctrl MO CO	Complete Overlap	h6b7	8.267	383.874	37.646	1666.287	13.354
Ctrl MO CO	Complete Overlap	h6b7	8.267	363.635	41.307	2011.59	13.354
Ctrl MO CO	Complete Overlap
Ctrl MO CO	Complete Overlap	h6b8	7.727	169.252	7.676	455.185	12.476
Ctrl MO CO	Complete Overlap	h6b8	7.727	372.559	42.487	1342.675	12.476
Ctrl MO CO	Complete Overlap	h6b8	7.727	584.032	122.435	1671.553	12.476
Ctrl MO CO	Complete Overlap	h6b8	7.727	632.165	163.128	2311.339	12.476
Ctrl MO CO	Complete Overlap	h6b8	7.727	513.401	109.118	1826.028	12.476
Ctrl MO CO	Complete Overlap
Ctrl MO CO	Complete Overlap	h6b9	7.889	618.82	89.062	3424.323	12.7
Ctrl MO CO	Complete Overlap	h6b9	7.889	587.497	80.014	2472.789	12.7
Ctrl MO CO	Complete Overlap	h6b9	7.889	479.929	43.845	1336.351	12.7
Ctrl MO CO	Complete Overlap
Ctrl MO CO	Complete Overlap	h6b10	4.755	442.565	85.538	1246.463	7.644
Ctrl MO CO	Complete Overlap	h6b10	4.755	592.904	88.405	2117.962	7.644
Ctrl MO CO	Complete Overlap	h6b10	4.755	566.673	78.699	2093.268	7.644
Ctrl MO CO	Complete Overlap	h6b10	4.755	395.851	52.77	1930.316	7.644
Ctrl MO CO	Complete Overlap
Ctrl MO CO	Complete Overlap	h6b11	10.05	342.223	27.012	1326.956	16.254
Ctrl MO CO	Complete Overlap	h6b11	10.05	548.588	109.295	1964.472	16.254
Ctrl MO CO	Complete Overlap	h6b11	10.05	613.19	129.922	1754.652	16.254
Ctrl MO CO	Complete Overlap	h6b11	10.05	638.249	124.102	2906.724	16.254
Ctrl MO CO	Complete Overlap	h6b11	10.05	515.423	75.517	2715.968	16.254
Ctrl MO CO	Complete Overlap
Ctrl MO CO	Complete Overlap	h6b12	9.618	217.094	25.751	816.104	15.551
Ctrl MO CO	Complete Overlap	h6b12	9.618	337.993	44.255	1393.553	15.551
Ctrl MO CO	Complete Overlap	h6b12	9.618	392.836	47.963	1395.743	15.551
Ctrl MO CO	Complete Overlap	h6b12	9.618	428.818	50.688	1419.519	15.551
Ctrl MO CO	Complete Overlap	h6b12	9.618	410.518	45.325	1609.385	15.551
Ctrl MO CO	Complete Overlap
Ctrl MO CO	Complete Overlap	h6b13	7.997	400.579	61.659	1531.299	12.915
Ctrl MO CO	Complete Overlap	h6b13	7.997	451.338	57.348	1969.042	12.915
Ctrl MO CO	Complete Overlap	h6b13	7.997	496.578	52.087	1814.358	12.915
Ctrl MO CO	Complete Overlap	h6b13	7.997	514.443	94.753	4070.368	12.915
Ctrl MO CO	Complete Overlap
Ctrl MO CO	Complete Overlap	h6b14	10.266	284.686	18.363	1014.02	16.605
Ctrl MO CO	Complete Overlap	h6b14	10.266	366.041	37.27	1270.988	16.605
Ctrl MO CO	Complete Overlap	h6b14	10.266	460.492	63.099	1701.037	16.605
Ctrl MO CO	Complete Overlap	h6b14	10.266	503.306	70.748	2314.044	16.605
Ctrl MO CO	Complete Overlap	h6b14	10.266	390.082	86.312	1806.727	16.605
Ctrl MO CO	Complete Overlap
Ctrl MO CO	Complete Overlap	h6b15	7.403	279.983	30.385	1005.309	11.949
Ctrl MO CO	Complete Overlap	h6b15	7.403	361.338	22.972	1293.411	11.949
Ctrl MO CO	Complete Overlap	h6b15	7.403	423.587	36.414	1540.533	11.949
Ctrl MO CO	Complete Overlap	h6b15	7.403	474.685	64.059	2323.021	11.949
Ctrl MO CO	Complete Overlap	h6b15	7.403	444.278	58.037	2199.866	11.949
Ctrl MO CO	Complete Overlap	h6b15	7.403	438.379	55.088	1771.215	11.949
Ctrl MO CO	Complete Overlap
Ctrl MO CO	Complete Overlap	h6b16	8.916	345.082	29.834	1117.065	14.409
Ctrl MO CO	Complete Overlap	h6b16	8.916	402.506	49.133	1498.511	14.409
Ctrl MO CO	Complete Overlap	h6b16	8.916	382.804	42.912	1833.302	14.409
Ctrl MO CO	Complete Overlap	h6b16	8.916	343.323	29.401	1539.578	14.409
Ctrl MO CO	Complete Overlap	h6b16	8.916	332.594	32.388	1566.889	14.409
Ctrl MO CO	Complete Overlap	h6b16	8.916	284.124	21.428	1524.531	14.409
Ctrl MO CO	Complete Overlap
Ctrl MO CO	Complete Overlap	h6b17	10.429	244.679	16.976	1001.142	16.868
Ctrl MO CO	Complete Overlap	h6b17	10.429	314.802	25.252	1299.543	16.868
Ctrl MO CO	Complete Overlap	h6b17	10.429	366.842	33.709	1934.853	16.868
Ctrl MO CO	Complete Overlap	h6b17	10.429	362.131	32.446	1928.193	16.868
Ctrl MO CO	Complete Overlap	h6b17	10.429	317.257	34.21	1093.671	16.868
Ctrl MO CO	Complete Overlap	h6b17	10.429	315.159	31.182	1371.919	16.868
Ctrl MO CO	Complete Overlap	h6b17	10.429	308.022	28.931	2511.816	16.868
Ctrl MO CO	Complete Overlap	h7b1	7.781	209.536	5.416	837.117	12.564
Ctrl MO CO	Complete Overlap	h7b1	7.781	395.896	25.059	3255.175	12.564
Ctrl MO CO	Complete Overlap	h7b1	7.781	442.916	35.43	2802.152	12.564
Ctrl MO CO	Complete Overlap	h7b1	7.781	423.187	25.911	2087.542	12.564
Ctrl MO CO	Complete Overlap	h7b1	7.781	442.244	48.952	2815.864	12.564
Ctrl MO CO	Complete Overlap
Ctrl MO CO	Complete Overlap	h7b2	4.539	223.1	23.08	777.286	7.292
Ctrl MO CO	Complete Overlap	h7b2	4.539	329.781	31.673	1483.786	7.292
Ctrl MO CO	Complete Overlap	h7b2	4.539	336.75	35.784	1223.724	7.292
Ctrl MO CO	Complete Overlap	h7b2	4.539	407.847	69.335	1319.907	7.292
Ctrl MO CO	Complete Overlap	h7b2	4.539	375.643	63.699	1812.547	7.292
Ctrl MO PO	Partial Overlap	h2b1	13.725	149.959	6.676	615.712	22.228
Ctrl MO PO	Partial Overlap	h2b1	13.725	240.701	8.705	815.929	22.228
Ctrl MO PO	Partial Overlap	h2b1	13.725	296.645	28.411	1524.571	22.228
Ctrl MO PO	Partial Overlap	h2b1	13.725	315.565	31.591	1661.463	22.228
Ctrl MO PO	Partial Overlap	h2b1	13.725	319.199	34.627	1943.05	22.228
Ctrl MO PO	Partial Overlap	h2b1	13.725	318.819	23.464	1333.216	22.228
Ctrl MO PO	Partial Overlap	h2b1	13.725	324.912	57.888	1639.537	22.228
Ctrl MO PO	Partial Overlap
Ctrl MO PO	Partial Overlap	h2b2	9.996	284.574	52.251	756.112	16.166
Ctrl MO PO	Partial Overlap	h2b2	9.996	441.34	66.767	1465.135	16.166
Ctrl MO PO	Partial Overlap	h2b2	9.996	548.072	90.11	2187.798	16.166
Ctrl MO PO	Partial Overlap	h2b2	9.996	597.054	81.472	2160.812	16.166
Ctrl MO PO	Partial Overlap	h2b2	9.996	595.038	110.049	2060.643	16.166
Ctrl MO PO	Partial Overlap	h2b2	9.996	565.156	81.919	1750.942	16.166
Ctrl MO PO	Partial Overlap	h2b2	9.996	417.272	63.68	1218.753	16.166
Ctrl MO PO	Partial Overlap	h3b1	6.7	361.254	43.189	921.759	10.807
Ctrl MO PO	Partial Overlap	h3b1	6.7	236.472	26.557	644.097	10.807
Ctrl MO PO	Partial Overlap	h3b1	6.7	174.445	12.079	521.328	10.807
Ctrl MO PO	Partial Overlap	h3b1	6.7	96.469	4.25	495.216	10.807
Ctrl MO PO	Partial Overlap	h3b1	6.7	56.831	0	251.625	10.807
Ctrl MO PO	Partial Overlap	h4b1	12.428	450.729	57.174	2449.295	20.114
Ctrl MO PO	Partial Overlap	h4b1	12.428	514.153	29.122	2417.981	20.114
Ctrl MO PO	Partial Overlap	h4b1	12.428	460.095	38.59	1344.783	20.114
Ctrl MO PO	Partial Overlap	h4b1	12.428	280.088	36.413	2630.739	20.114
Ctrl MO PO	Partial Overlap
Ctrl MO PO	Partial Overlap	h4b2	11.833	169.581	11.191	731.291	19.153
Ctrl MO PO	Partial Overlap	h4b2	11.833	322.656	43.207	1751.045	19.153
Ctrl MO PO	Partial Overlap	h4b2	11.833	425.645	31.036	3205.391	19.153
Ctrl MO PO	Partial Overlap	h4b2	11.833	459.668	71.754	2495.062	19.153
Ctrl MO PO	Partial Overlap	h4b2	11.833	414.46	50.711	1603.911	19.153
Ctrl MO PO	Partial Overlap	h4b2	11.833	288.323	8.618	2476.721	19.153
Ctrl MO PO	Partial Overlap	h4b2	11.833	200.292	2.287	1744.882	19.153
Ctrl MO PO	Partial Overlap	h5b1	9.564	252.177	12.657	740.514	15.463
Ctrl MO PO	Partial Overlap	h5b1	9.564	353.141	11.733	1117.477	15.463
Ctrl MO PO	Partial Overlap	h5b1	9.564	476.1	33.264	1599.64	15.463
Ctrl MO PO	Partial Overlap	h5b1	9.564	844.448	119.473	2289.93	15.463
Ctrl MO PO	Partial Overlap	h5b1	9.564	895.814	140.668	2796.799	15.463
Ctrl MO PO	Partial Overlap	h5b1	9.564	753.628	150.97	2636.421	15.463
Ctrl MO PO	Partial Overlap	h5b1	9.564	538.867	95.57	2245.675	15.463
Ctrl MO PO	Partial Overlap
Ctrl MO PO	Partial Overlap	h5b2	11.023	244.242	22.176	699.962	17.835
Ctrl MO PO	Partial Overlap	h5b2	11.023	363.932	36.475	1275.733	17.835
Ctrl MO PO	Partial Overlap	h5b2	11.023	493.725	48.677	2439.358	17.835
Ctrl MO PO	Partial Overlap	h5b2	11.023	596.975	11.228	2617.617	17.835
Ctrl MO PO	Partial Overlap	h5b2	11.023	456.036	42.225	4057.235	17.835
Ctrl MO PO	Partial Overlap	h5b2	10.645	603.343	152.646	2218.26	17.22
Ctrl MO PO	Partial Overlap	h5b2	10.645	537.202	151.496	1740.099	17.22
Ctrl MO PO	Partial Overlap	h5b2	10.645	510.926	144.23	1801.308	17.22
Ctrl MO PO	Partial Overlap	h5b2	10.645	500.119	65.256	1692.747	17.22
Ctrl MO PO	Partial Overlap	h6b1	11.942	168.908	8.93	767.15	19.329
Ctrl MO PO	Partial Overlap	h6b1	11.942	253.321	15.313	1504.358	19.329
Ctrl MO PO	Partial Overlap	h6b1	11.942	337.068	26.62	2061.064	19.329
Ctrl MO PO	Partial Overlap	h6b1	11.942	399.248	26.83	2005.391	19.329
Ctrl MO PO	Partial Overlap	h6b1	11.942	352.707	37.985	1860.792	19.329
Ctrl MO PO	Partial Overlap	h6b1	11.942	345.629	41.124	1756.063	19.329
Ctrl MO PO	Partial Overlap	h6b1	11.942	335.479	51.377	2525.36	19.329
Ctrl MO PO	Partial Overlap
Ctrl MO PO	Partial Overlap	h6b2	9.456	372.847	54.086	1295.751	15.287
Ctrl MO PO	Partial Overlap	h6b2	9.456	485.937	53.625	2219.232	15.287
Ctrl MO PO	Partial Overlap	h6b2	9.456	561.557	55.524	2200.451	15.287
Ctrl MO PO	Partial Overlap	h6b2	9.456	541.841	66.092	2298.091	15.287
Ctrl MO PO	Partial Overlap	h6b2	9.456	473.768	95.054	2635.583	15.287
Ctrl MO PO	Partial Overlap	h6b2	9.456	405.991	81.264	2847.156	15.287
Ctrl MO PO	Partial Overlap	h6b2	9.456	283.133	44.707	1273.225	15.287
Ctrl MO PO	Partial Overlap	h7b1	4.539	223.1	23.08	777.286	7.292
Ctrl MO PO	Partial Overlap	h7b1	4.539	329.781	31.673	1483.786	7.292
Ctrl MO PO	Partial Overlap	h7b1	4.539	336.75	35.784	1223.724	7.292
Ctrl MO PO	Partial Overlap	h7b1	4.539	407.847	69.335	1319.907	7.292
Ctrl MO PO	Partial Overlap	h7b1	4.539	375.643	63.699	1812.547	7.292
Ctrl MO NO	No Overlap	h2b1	6.052	174.42	5.537	708.165	9.752
Ctrl MO NO	No Overlap	h2b1	6.052	242.177	14.486	840.281	9.752
Ctrl MO NO	No Overlap	h2b1	6.052	361.959	32.521	1398.993	9.752
Ctrl MO NO	No Overlap	h2b1	6.052	487.218	35.926	2230.88	9.752
Ctrl MO NO	No Overlap	h2b1	6.052	520.015	75.352	2648.536	9.752
Ctrl MO NO	No Overlap	h2b1	6.052	477.678	50.938	2351.795	9.752
Ctrl MO NO	No Overlap	h2b1	6.052	440.683	27.9	1402.21	9.752
Ctrl MO NO	No Overlap	h2b1	6.052	430.075	10.62	1803.812	9.752
Ctrl MO NO	No Overlap
Ctrl MO NO	No Overlap	h2b2	4.485	258.698	11.006	1074.426	7.204
Ctrl MO NO	No Overlap	h2b2	4.485	355.311	27.909	1323.376	7.204
Ctrl MO NO	No Overlap	h2b2	4.485	414.402	32.316	1254.334	7.204
Ctrl MO NO	No Overlap	h2b2	4.485	422.563	113.988	1321.487	7.204
Ctrl MO NO	No Overlap	h2b2	4.485	422.002	113.34	1440.405	7.204
Ctrl MO NO	No Overlap	h2b2	4.485	439.006	80.318	2306.944	7.204
Ctrl MO NO	No Overlap
Ctrl MO NO	No Overlap	h2b3	8.591	272.776	16.235	945.766	13.882
Ctrl MO NO	No Overlap	h2b3	8.591	301.679	19.366	1379.954	13.882
Ctrl MO NO	No Overlap	h2b3	8.591	292.088	32.311	2394.08	13.882
Ctrl MO NO	No Overlap	h2b3	8.591	315.962	41.51	2394.061	13.882
Ctrl MO NO	No Overlap	h2b3	7.457	596.952	107.392	2005.774	12.037
Ctrl MO NO	No Overlap	h2b3	7.457	593.406	139.764	1973.807	12.037
Ctrl MO NO	No Overlap	h2b3	7.457	535.147	62.346	2356.395	12.037
Ctrl MO NO	No Overlap	h2b3	7.457	426.14	57.621	2603.22	12.037
Ctrl MO NO	No Overlap
Ctrl MO NO	No Overlap	h2b4	5.566	313.745	15.368	1177.739	8.962
Ctrl MO NO	No Overlap	h2b4	5.566	345.63	20.29	1273.876	8.962
Ctrl MO NO	No Overlap	h2b4	5.566	368.549	26.72	1566.327	8.962
Ctrl MO NO	No Overlap	h2b4	5.728	498.324	94.365	1784.275	9.225
Ctrl MO NO	No Overlap	h2b4	5.728	497.023	129.033	1437.357	9.225
Ctrl MO NO	No Overlap	h2b4	5.728	476.943	99.397	1821.468	9.225
Ctrl MO NO	No Overlap	h2b4	5.728	461.752	114.16	1756.074	9.225
Ctrl MO NO	No Overlap	h2b4	5.728	460.794	123.638	1318.154	9.225
Ctrl MO NO	No Overlap	h2b4	5.728	428.222	48.632	2220.771	9.225
Ctrl MO NO	No Overlap
Ctrl MO NO	No Overlap	h2b5	8.375	309.786	33.167	863.099	13.53
Ctrl MO NO	No Overlap	h2b5	8.375	372.74	64.062	1161.288	13.53
Ctrl MO NO	No Overlap	h2b5	8.375	459.108	73.062	2146.834	13.53
Ctrl MO NO	No Overlap	h2b5	8.375	541.147	67.138	2338.822	13.53
Ctrl MO NO	No Overlap	h2b5	8.375	524.483	90.44	2439.478	13.53
Ctrl MO NO	No Overlap	h2b5	8.375	490.282	98.952	2337.801	13.53
Ctrl MO NO	No Overlap	h2b5	8.375	463.981	120.599	1997.522	13.53
Ctrl MO NO	No Overlap
Ctrl MO NO	No Overlap	h2b6	6.214	229.597	20.134	1010.63	10.008
Ctrl MO NO	No Overlap	h2b6	6.214	307.753	25.558	1659.767	10.008
Ctrl MO NO	No Overlap	h2b6	6.214	319.928	20.155	1938.867	10.008
Ctrl MO NO	No Overlap	h2b6	6.106	375.058	39.71	1857.078	9.833
Ctrl MO NO	No Overlap	h2b6	6.106	332.895	60.04	1336.176	9.833
Ctrl MO NO	No Overlap	h2b6	6.106	309.548	53.734	1409.328	9.833
Ctrl MO NO	No Overlap	h2b6	6.7	635.239	78.904	2274.556	10.804
Ctrl MO NO	No Overlap	h2b6	6.7	562.785	84.929	2020.962	10.804
Ctrl MO NO	No Overlap	h2b6	6.7	480.888	99.962	1620	10.804
Ctrl MO NO	No Overlap	h2b6	6.7	422.996	101.938	1342.229	10.804
Ctrl MO NO	No Overlap	h2b6	6.7	359.914	50.463	1345.525	10.804
Ctrl MO NO	No Overlap	h3b1	5.241	182.808	11.396	660.588	8.434
Ctrl MO NO	No Overlap	h3b1	5.241	240.203	6.86	1163.124	8.434
Ctrl MO NO	No Overlap	h3b1	5.241	261.452	16.958	1243.217	8.434
Ctrl MO NO	No Overlap	h3b1	5.241	314.16	28.021	968.855	8.434
Ctrl MO NO	No Overlap	h3b1	5.241	383.073	2.236	1011.167	8.434
Ctrl MO NO	No Overlap
Ctrl MO NO	No Overlap	h3b2	9.456	106.765	1.711	651.249	15.287
Ctrl MO NO	No Overlap	h3b2	9.456	229.135	15.116	1332.321	15.287
Ctrl MO NO	No Overlap	h3b2	9.456	362.254	16.095	1472.281	15.287
Ctrl MO NO	No Overlap	h3b2	9.456	398.86	38.659	1363.779	15.287
Ctrl MO NO	No Overlap	h3b2	9.456	406.262	60.051	1461.407	15.287
Ctrl MO NO	No Overlap	h3b2	9.456	324.786	34.146	1451.845	15.287
Ctrl MO NO	No Overlap
Ctrl MO NO	No Overlap	h3b3	9.348	92.477	1.381	434.079	15.112
Ctrl MO NO	No Overlap	h3b3	9.348	212.607	4.707	1107.61	15.112
Ctrl MO NO	No Overlap	h3b3	9.348	305.624	20.308	1742.83	15.112
Ctrl MO NO	No Overlap	h3b3	9.348	316.857	11.867	1358.95	15.112
Ctrl MO NO	No Overlap	h3b3	9.348	315.327	26.081	1019.379	15.112
Ctrl MO NO	No Overlap	h3b3	9.348	256.04	10.596	1088.867	15.112
Ctrl MO NO	No Overlap	h3b4	9.456	106.765	1.711	651.249	15.287
Ctrl MO NO	No Overlap	h3b4	9.456	229.135	15.116	1332.321	15.287
Ctrl MO NO	No Overlap	h3b4	9.456	362.254	16.095	1472.281	15.287
Ctrl MO NO	No Overlap	h3b4	9.456	398.86	38.659	1363.779	15.287
Ctrl MO NO	No Overlap	h3b4	9.456	406.262	60.051	1461.407	15.287
Ctrl MO NO	No Overlap	h3b4	9.456	324.786	34.146	1451.845	15.287
Ctrl MO NO	No Overlap
Ctrl MO NO	No Overlap	h3b5	9.456	106.765	1.711	651.249	15.287
Ctrl MO NO	No Overlap	h3b5	9.456	229.135	15.116	1332.321	15.287
Ctrl MO NO	No Overlap	h3b5	9.456	362.254	16.095	1472.281	15.287
Ctrl MO NO	No Overlap	h3b5	9.456	398.86	38.659	1363.779	15.287
Ctrl MO NO	No Overlap	h3b5	9.456	406.262	60.051	1461.407	15.287
Ctrl MO NO	No Overlap	h3b5	9.456	324.786	34.146	1451.845	15.287
Ctrl MO NO	No Overlap	h4b1	11.131	149.517	4.775	649.961	18.011
Ctrl MO NO	No Overlap	h4b1	11.131	269.739	27.03	884.13	18.011
Ctrl MO NO	No Overlap	h4b1	11.131	340.487	54.46	1005.182	18.011
Ctrl MO NO	No Overlap	h4b1	11.131	380.936	75.473	1190.017	18.011
Ctrl MO NO	No Overlap	h4b1	11.131	511.05	90.733	1906.284	18.011
Ctrl MO NO	No Overlap	h4b1	11.131	556.944	78.698	3885.158	18.011
Ctrl MO NO	No Overlap	h4b1	11.131	334.021	32.819	2257.235	18.011
Ctrl MO NO	No Overlap	h4b1	11.131	230.653	17.123	1842.089	18.011
Ctrl MO NO	No Overlap
Ctrl MO NO	No Overlap	h4b2	13.563	129.813	0	560.306	21.965
Ctrl MO NO	No Overlap	h4b2	13.563	180.12	0.507	669.109	21.965
Ctrl MO NO	No Overlap	h4b2	13.563	197.23	0.653	1081.871	21.965
Ctrl MO NO	No Overlap	h4b2	13.563	206.173	1.929	1144.776	21.965
Ctrl MO NO	No Overlap	h4b2	13.887	330.393	12.218	1556.947	22.492
Ctrl MO NO	No Overlap	h4b2	13.887	410.703	47.143	3979.226	22.492
Ctrl MO NO	No Overlap	h4b2	13.887	447.443	58.607	4094.972	22.492
Ctrl MO NO	No Overlap	h4b2	13.887	400.146	49.299	3380.025	22.492
Ctrl MO NO	No Overlap	h5b1	10.969	330.476	15.579	1020.034	17.747
Ctrl MO NO	No Overlap	h5b1	10.969	432.82	48.293	2100.485	17.747
Ctrl MO NO	No Overlap	h5b1	10.969	496.766	30.344	2626.249	17.747
Ctrl MO NO	No Overlap	h5b1	10.969	501.341	47.015	1928.228	17.747
Ctrl MO NO	No Overlap	h5b1	10.969	488.942	86.043	2264.577	17.747
Ctrl MO NO	No Overlap	h5b1	10.969	437.448	52.963	2221.319	17.747
Ctrl MO NO	No Overlap	h5b1	10.969	368.293	45.959	2125.289	17.747
Ctrl MO NO	No Overlap	h6b1	8.645	297.955	14.079	934.304	13.969
Ctrl MO NO	No Overlap	h6b1	8.645	407.397	46.733	1350.792	13.969
Ctrl MO NO	No Overlap	h6b1	8.645	541.352	57.001	1566.016	13.969
Ctrl MO NO	No Overlap	h6b1	8.645	512.944	81.309	1647.559	13.969
Ctrl MO NO	No Overlap	h6b1	8.645	385.699	34.719	1122.601	13.969
Ctrl MO NO	No Overlap
Ctrl MO NO	No Overlap	h6b2	9.996	324.175	28.243	1140.97	16.166
Ctrl MO NO	No Overlap	h6b2	9.996	379.268	38.626	1930.119	16.166
Ctrl MO NO	No Overlap	h6b2	9.996	390.711	34.564	1593.243	16.166
Ctrl MO NO	No Overlap	h6b2	9.996	379.078	43.382	1883.823	16.166
Ctrl MO NO	No Overlap	h6b2	9.996	370.898	34.944	2363.252	16.166
Ctrl MO NO	No Overlap	h6b2	9.996	373.241	37.394	1653.382	16.166
Ctrl MO NO	No Overlap
Ctrl MO NO	No Overlap	h6b3	5.836	304.915	18.764	747.061	9.401
Ctrl MO NO	No Overlap	h6b3	5.836	362.623	68.526	1172.605	9.401
Ctrl MO NO	No Overlap	h6b3	5.836	405.255	69.297	1564.017	9.401
Ctrl MO NO	No Overlap	h6b3	5.836	415.374	52.313	1098.934	9.401
Ctrl MO NO	No Overlap	h6b3	5.836	405.223	36.597	1251.189	9.401
Ctrl MO NO	No Overlap
Ctrl MO NO	No Overlap	h6b4	8.429	336.377	41.91	1134.011	13.618
Ctrl MO NO	No Overlap	h6b4	8.429	402.598	45.56	1392.799	13.618
Ctrl MO NO	No Overlap	h6b4	8.429	523.159	38.201	2405.302	13.618
Ctrl MO NO	No Overlap	h6b4	8.429	638.308	40.539	3097.97	13.618
Ctrl MO NO	No Overlap	h6b4	8.429	664.886	43.008	2021.859	13.618
Ctrl MO NO	No Overlap	h6b4	8.429	563.692	81.635	1459.806	13.618
Ctrl MO NO	No Overlap
Ctrl MO NO	No Overlap	h6b5	9.51	384.484	27.697	1157.891	15.375
Ctrl MO NO	No Overlap	h6b5	9.51	524.106	39.082	2198.304	15.375
Ctrl MO NO	No Overlap	h6b5	9.51	642.909	91.084	2748.461	15.375
Ctrl MO NO	No Overlap	h6b5	9.51	653.76	95.884	2635.806	15.375
Ctrl MO NO	No Overlap	h6b5	9.51	534.952	131.769	2662.154	15.375
Ctrl MO NO	No Overlap	h6b5	9.51	418.463	75.984	2915.989	15.375
Ctrl MO NO	No Overlap
Ctrl MO NO	No Overlap	h6b6	7.673	276.542	26.32	1069.477	12.388
Ctrl MO NO	No Overlap	h6b6	7.673	320.879	34.685	1475.991	12.388
Ctrl MO NO	No Overlap	h6b6	7.673	303.125	29.19	1697.806	12.388
Ctrl MO NO	No Overlap	h6b6	7.673	298.436	55.551	1237.847	12.388
Ctrl MO NO	No Overlap	h6b6	8.321	468.647	41.099	1748.174	13.442
Ctrl MO NO	No Overlap	h6b6	8.321	400.815	44.55	1684.826	13.442
Ctrl MO NO	No Overlap
Ctrl MO NO	No Overlap	h6b7	14.427	195.517	18.224	827.395	23.37
Ctrl MO NO	No Overlap	h6b7	14.427	296.689	28.544	1105.933	23.37
Ctrl MO NO	No Overlap	h6b7	14.427	440.627	36.763	1686.062	23.37
Ctrl MO NO	No Overlap	h6b7	14.427	570.824	51.06	2330.306	23.37
Ctrl MO NO	No Overlap	h6b7	14.427	643.202	51.893	3074.873	23.37
Ctrl MO NO	No Overlap	h6b7	14.427	605.941	35.954	3528.545	23.37
Ctrl MO NO	No Overlap	h6b7	14.427	493.881	56.071	4092.974	23.37
Ctrl MO NO	No Overlap	h7b1	12.644	342.257	20.231	1369.385	20.471
Ctrl MO NO	No Overlap	h7b1	12.644	575.52	71.608	2241.037	20.471
Ctrl MO NO	No Overlap	h7b1	12.644	597.68	69.479	2124.373	20.471
Ctrl MO NO	No Overlap	h7b1	12.644	557.92	66.74	2114.698	20.471
Ctrl MO NO	No Overlap
Ctrl MO NO	No Overlap	h7b2	10.537	110.069	7.151	299.495	17.045
Ctrl MO NO	No Overlap	h7b2	10.537	318.849	29.101	1143.349	17.045
Ctrl MO NO	No Overlap	h7b2	10.537	649.227	108.321	2620.358	17.045
Ctrl MO NO	No Overlap	h7b2	10.537	690.417	110.25	2797.482	17.045
Ctrl MO NO	No Overlap	h7b2	10.537	677.257	126.982	3889.416	17.045
Ctrl MO NO	No Overlap	h7b2	10.537	532.89	42.206	3130.014	17.045
Ctrl MO NO	No Overlap
Ctrl MO NO	No Overlap	h7b3	3.188	291.134	50.048	1121.438	5.096
Ctrl MO NO	No Overlap	h7b3	3.188	563.977	157.037	2364.952	5.096
Ctrl MO NO	No Overlap	h7b3	3.188	527.231	90.869	2064.917	5.096
Ctrl MO NO	No Overlap	h7b3	3.188	642.487	121.118	1348.458	5.096
Ctrl MO NO	No Overlap	h7b3	3.188	601.644	47.573	1633.069	5.096
Ctrl MO NO	No Overlap
Ctrl MO NO	No Overlap	h7b4	12.212	302.245	48.732	1196.682	19.768
Ctrl MO NO	No Overlap	h7b4	12.212	501.445	96.605	2068.549	19.768
Ctrl MO NO	No Overlap	h7b4	12.212	584.106	94.134	2075.495	19.768
Ctrl MO NO	No Overlap	h7b4	12.212	536.895	43.868	1882.825	19.768
Ctrl MO NO	No Overlap
Ctrl MO NO	No Overlap	h7b5	12.86	133.75	7.575	564.037	20.823
Ctrl MO NO	No Overlap	h7b5	12.86	299.7	42.811	1241.949	20.823
Ctrl MO NO	No Overlap	h7b5	12.86	380.667	16.794	1662.553	20.823
Ctrl MO NO	No Overlap	h7b5	12.86	504.958	68.651	2509.365	20.823
Ctrl MO NO	No Overlap	h7b5	12.86	621.815	69.383	3110.469	20.823
Ctrl MO NO	No Overlap	h7b5	12.86	502.508	54.757	2495.478	20.823
Ecad MO CO	Complete Overlap	h2b2	9.78	498.553	122.499	2748.66	15.815
Ecad MO CO	Complete Overlap	h2b2	9.78	585.267	72.41	1892.882	15.815
Ecad MO CO	Complete Overlap	h2b2	9.78	614.825	123.728	3217.767	15.815
Ecad MO CO	Complete Overlap	h2b2	9.78	590.014	98.897	2418.529	15.815
Ecad MO CO	Complete Overlap	h2b2	9.78	554.94	86.826	4033.131	15.815
Ecad MO CO	Complete Overlap	h2b2	9.78	470.553	60.709	4095	15.815
Ecad MO CO	Complete Overlap	h2b2	9.78	289.235	19.898	1274.596	15.815
Ecad MO CO	Complete Overlap
Ecad MO CO	Complete Overlap	h2b3	5.89	368.388	52.418	1242.835	9.489
Ecad MO CO	Complete Overlap	h2b3	5.89	349.993	24.607	1500.101	9.489
Ecad MO CO	Complete Overlap	h2b3	5.89	260.193	23.932	657.45	9.489
Ecad MO CO	Complete Overlap	h2b3	5.89	179.587	21.162	495.544	9.489
Ecad MO CO	Complete Overlap	h2b3	5.89	111.115	18.648	416.157	9.489
Ecad MO CO	Complete Overlap
Ecad MO CO	Complete Overlap	h2b4	8.862	268.845	48.822	911.4	14.321
Ecad MO CO	Complete Overlap	h2b4	8.862	326.454	68.057	1438.553	14.321
Ecad MO CO	Complete Overlap	h2b4	8.862	329.279	50.968	2063.591	14.321
Ecad MO CO	Complete Overlap	h2b4	7.619	343.943	67.724	1148.194	12.3
Ecad MO CO	Complete Overlap	h2b4	7.619	450.048	47.149	1695.99	12.3
Ecad MO CO	Complete Overlap	h2b4	7.619	477.132	60.439	3026.683	12.3
Ecad MO CO	Complete Overlap
Ecad MO CO	Complete Overlap	h2b5	7.727	222.92	19.33	721.489	12.476
Ecad MO CO	Complete Overlap	h2b5	7.727	208.94	24.041	824.468	12.476
Ecad MO CO	Complete Overlap	h2b5	7.727	223.845	21.781	1010.355	12.476
Ecad MO CO	Complete Overlap	h2b5	7.727	293.709	24.567	1314.53	12.476
Ecad MO CO	Complete Overlap	h2b5	7.727	256.429	42.487	1386.309	12.476
Ecad MO CO	Complete Overlap	h2b5	7.241	300.158	44.841	1662.454	11.685
Ecad MO CO	Complete Overlap	h2b5	7.241	280.766	52.952	1309.357	11.685
Ecad MO CO	Complete Overlap	h2b5	7.241	269.868	35.073	1067.142	11.685
Ecad MO CO	Complete Overlap
Ecad MO CO	Complete Overlap	h2b6	7.673	192.45	27.295	717.617	12.388
Ecad MO CO	Complete Overlap	h2b6	7.673	241.721	15.195	1177.389	12.388
Ecad MO CO	Complete Overlap	h2b6	7.673	233.175	27.357	1143.712	12.388
Ecad MO CO	Complete Overlap	h2b6	7.673	201.033	10.783	852.952	12.388
Ecad MO CO	Complete Overlap	h2b6	6.646	233.357	17.718	824.861	10.719
Ecad MO CO	Complete Overlap	h2b6	6.646	241.078	11.229	667.357	10.719
Ecad MO CO	Complete Overlap	h2b6	6.646	236.797	24.481	1817.436	10.719
Ecad MO CO	Complete Overlap
Ecad MO CO	Complete Overlap	h2b7	2.648	196.199	25.605	476.406	4.217
Ecad MO CO	Complete Overlap	h2b7	2.648	193.945	22.586	480.35	4.217
Ecad MO CO	Complete Overlap	h2b7	2.648	173.671	33.838	591.459	4.217
Ecad MO CO	Complete Overlap	h2b7	2.648	180.189	37.549	776.294	4.217
Ecad MO CO	Complete Overlap	h2b7	2.648	223.176	55.243	737.888	4.217
Ecad MO CO	Complete Overlap	h2b7	2.648	271.24	54.919	1601.731	4.217
Ecad MO CO	Complete Overlap	h3b1	11.725	364.476	72.919	1210.752	18.977
Ecad MO CO	Complete Overlap	h3b1	11.725	402.509	84.363	1086.278	18.977
Ecad MO CO	Complete Overlap	h3b1	11.725	444.299	84.043	1315.157	18.977
Ecad MO CO	Complete Overlap	h3b1	11.725	446.568	65.401	1150.556	18.977
Ecad MO CO	Complete Overlap	h3b1	11.725	398	79.956	1287.183	18.977
Ecad MO CO	Complete Overlap	h3b1	11.293	318.14	5.394	1321.398	18.275
Ecad MO CO	Complete Overlap	h3b1	11.293	270.15	34.446	846.145	18.275
Ecad MO CO	Complete Overlap
Ecad MO CO	Complete Overlap	h3b2	5.566	226.459	39.478	653.653	8.961
Ecad MO CO	Complete Overlap	h3b2	5.566	283.993	65.085	1094.646	8.961
Ecad MO CO	Complete Overlap	h3b2	5.566	293.377	79.351	1165.841	8.961
Ecad MO CO	Complete Overlap	h3b2	5.566	342.046	120.087	904.718	8.962
Ecad MO CO	Complete Overlap	h3b2	5.566	343.707	121.42	938.491	8.962
Ecad MO CO	Complete Overlap	h3b2	5.566	376.928	117.632	1181.897	8.962
Ecad MO CO	Complete Overlap	h3b2	5.566	387.856	61.165	1178.647	8.962
Ecad MO CO	Complete Overlap
Ecad MO CO	Complete Overlap	h3b3	10.321	293.516	39.057	1238.362	16.693
Ecad MO CO	Complete Overlap	h3b3	10.321	321.154	54.552	1369.958	16.693
Ecad MO CO	Complete Overlap	h3b3	10.321	327.168	28.395	1012.811	16.693
Ecad MO CO	Complete Overlap	h3b3	10.321	309.751	53.815	1465.152	16.693
Ecad MO CO	Complete Overlap	h3b3	10.321	305.606	42.962	2494.51	16.693
Ecad MO CO	Complete Overlap	h3b3	10.537	338.069	51.02	1977.985	17.045
Ecad MO CO	Complete Overlap	h3b3	10.537	338.069	51.02	1977.985	17.045
Ecad MO CO	Complete Overlap	h3b3	10.537	333.648	11.557	1599.35	17.045
Ecad MO CO	Complete Overlap	h3b3	10.537	277.439	35.981	1184.044	17.045
Ecad MO CO	Complete Overlap
Ecad MO CO	Complete Overlap	h3b4	9.078	319.706	46.758	947.678	14.672
Ecad MO CO	Complete Overlap	h3b4	9.078	368.346	60.078	1200.691	14.672
Ecad MO CO	Complete Overlap	h3b4	9.078	432.618	52.794	1534.529	14.672
Ecad MO CO	Complete Overlap	h3b4	9.078	505.978	60.365	1944.913	14.672
Ecad MO CO	Complete Overlap	h3b4	9.078	518.391	39.622	1534.239	14.672
Ecad MO CO	Complete Overlap	h3b4	9.078	493.92	97.173	2180.46	14.672
Ecad MO CO	Complete Overlap	h3b4	9.618	437.44	68.194	2822.372	15.533
Ecad MO CO	Complete Overlap	h3b4	9.618	335.826	52.465	1492.787	15.533
Ecad MO CO	Complete Overlap	h3b4	9.618	248.032	19.742	1113.441	15.533
Ecad MO CO	Complete Overlap	h4b1	9.888	362.012	66.346	911.082	15.99
Ecad MO CO	Complete Overlap	h4b1	9.888	458.017	66.75	1361.525	15.99
Ecad MO CO	Complete Overlap	h4b1	9.888	533.164	114.949	1493.55	15.99
Ecad MO CO	Complete Overlap	h4b1	9.888	610.544	95.079	1724.558	15.99
Ecad MO CO	Complete Overlap	h4b1	9.888	619.592	132.036	2079.659	15.99
Ecad MO CO	Complete Overlap	h4b1	9.888	541.414	93.145	1718.94	15.99
Ecad MO CO	Complete Overlap	h4b1	9.888	415.959	55.487	1761.912	15.99
Ecad MO CO	Complete Overlap	h4b1	9.888	297.513	48.52	1937.035	15.99
Ecad MO CO	Complete Overlap	h4b1	9.888	166.735	13.635	775.417	15.99
Ecad MO CO	Complete Overlap
Ecad MO CO	Complete Overlap	h4b2	2.81	268.297	50.263	531.884	4.481
Ecad MO CO	Complete Overlap	h4b2	2.81	328.227	50.39	715.428	4.481
Ecad MO CO	Complete Overlap	h4b2	2.81	340.93	14.483	1074.646	4.481
Ecad MO CO	Complete Overlap	h4b2	3.62	409.673	69.175	1878.39	5.799
Ecad MO CO	Complete Overlap	h4b2	3.62	342.194	38.424	1150.087	5.799
Ecad MO CO	Complete Overlap	h4b2	3.62	589.083	177.778	1407.375	5.799
Ecad MO CO	Complete Overlap	h4b2	3.62	477.443	125.762	1539.174	5.799
Ecad MO CO	Complete Overlap	h4b2	3.62	416.195	83.672	1382.044	5.799
Ecad MO CO	Complete Overlap	h4b2	3.62	291.54	66.148	1370.035	5.799
Ecad MO CO	Complete Overlap
Ecad MO CO	Complete Overlap	h4b3	7.349	463.83	90.621	1574.814	11.86
Ecad MO CO	Complete Overlap	h4b3	7.349	574.98	111.913	2355.476	11.86
Ecad MO CO	Complete Overlap	h4b3	7.349	560.349	70.099	2297.585	11.86
Ecad MO CO	Complete Overlap	h4b3	7.349	480.294	78.857	2954.197	11.86
Ecad MO CO	Complete Overlap	h4b3	7.241	568.197	103.518	3933.052	11.685
Ecad MO CO	Complete Overlap	h4b3	7.241	481.85	100.843	3219.841	11.685
Ecad MO CO	Complete Overlap	h4b3	7.241	349.575	72.527	2078.985	11.685
Ecad MO CO	Complete Overlap	h4b3	7.241	206.313	21.114	1733.224	11.685
Ecad MO CO	Complete Overlap	h4b3	7.241	157.769	9.941	1420.667	11.685
Ecad MO CO	Complete Overlap
Ecad MO CO	Complete Overlap	h4b4	9.672	221.098	4.79	750.884	15.639
Ecad MO CO	Complete Overlap	h4b4	9.672	313.121	16.488	987.104	15.639
Ecad MO CO	Complete Overlap	h4b4	9.672	410.058	24.894	1478.16	15.639
Ecad MO CO	Complete Overlap	h4b4	9.672	416.441	29.602	1651.41	15.639
Ecad MO CO	Complete Overlap	h4b4	9.672	343.101	40.981	1470.508	15.639
Ecad MO CO	Complete Overlap	h4b4	9.672	314.755	25.91	1528.477	15.639
Ecad MO CO	Complete Overlap	h4b4	9.942	383.914	45.518	1695.185	16.078
Ecad MO CO	Complete Overlap	h4b4	9.942	341.278	53.717	1900.119	16.078
Ecad MO CO	Complete Overlap	h4b4	9.672	295.258	49.506	1173.546	15.639
Ecad MO CO	Complete Overlap	h4b4	9.672	205.781	26.76	1285.393	15.639
Ecad MO CO	Complete Overlap
Ecad MO CO	Complete Overlap	h4b5	8.97	215.815	5.777	890.965	14.497
Ecad MO CO	Complete Overlap	h4b5	8.97	309.44	14.017	1583.864	14.497
Ecad MO CO	Complete Overlap	h4b5	8.97	436.091	26.87	2520.585	14.497
Ecad MO CO	Complete Overlap	h4b5	8.97	498.703	33.311	2270.227	14.497
Ecad MO CO	Complete Overlap	h4b5	8.97	522.313	62.662	1948.228	14.497
Ecad MO CO	Complete Overlap	h4b5	8.97	508.825	47.248	1823.891	14.497
Ecad MO CO	Complete Overlap	h4b5	8.916	588.933	57.643	1962.898	14.408
Ecad MO CO	Complete Overlap	h4b5	8.916	615.847	38.437	1682.66	14.408
Ecad MO CO	Complete Overlap	h4b5	8.916	589.787	47.276	3470.173	14.408
Ecad MO CO	Complete Overlap	h4b5	8.916	477.342	67.399	2077.4	14.408
Ecad MO CO	Complete Overlap
Ecad MO CO	Complete Overlap	h4b6	8.159	195.373	16.642	769.74	13.179
Ecad MO CO	Complete Overlap	h4b6	8.159	257.559	12.919	1227.606	13.179
Ecad MO CO	Complete Overlap	h4b6	8.159	317.28	38.915	1769.093	13.179
Ecad MO CO	Complete Overlap	h4b6	8.159	328.49	33.146	1748.637	13.179
Ecad MO CO	Complete Overlap	h4b6	8.159	316.48	41.298	1555.201	13.179
Ecad MO CO	Complete Overlap	h4b6	8.159	308.912	33.186	1303.393	13.179
Ecad MO CO	Complete Overlap	h4b6	8.159	294.168	41.192	1027.472	13.179
Ecad MO CO	Complete Overlap	h4b6	8.159	283.479	45.124	1063.162	13.179
Ecad MO CO	Complete Overlap	h4b6	8.159	244.528	56.919	849.806	13.179
Ecad MO CO	Complete Overlap	h4b6	8.159	215.734	20.375	934.009	13.179
Ecad MO CO	Complete Overlap	h4b6	8.159	196.565	6.204	752.124	13.179
Ecad MO CO	Complete Overlap
Ecad MO CO	Complete Overlap	h4b7	10.429	219.3	8.312	637.934	16.869
Ecad MO CO	Complete Overlap	h4b7	10.429	341.746	53.519	1410.345	16.869
Ecad MO CO	Complete Overlap	h4b7	10.429	441.551	42.615	2291.158	16.869
Ecad MO CO	Complete Overlap	h4b7	10.429	490.051	50.194	2418.302	16.869
Ecad MO CO	Complete Overlap	h4b7	10.429	466.702	72.961	2101.562	16.869
Ecad MO CO	Complete Overlap	h4b7	10.429	416.31	63.275	1417.502	16.869
Ecad MO CO	Complete Overlap	h4b7	11.023	397.412	80.289	1364.587	17.835
Ecad MO CO	Complete Overlap	h4b7	11.023	429.361	51.55	1117.931	17.835
Ecad MO CO	Complete Overlap	h4b7	11.023	330.017	25.498	1186.289	17.835
Ecad MO CO	Complete Overlap	h4b7	11.023	248.429	6.101	1595.586	17.835
Ecad MO CO	Complete Overlap	h5b1	10.645	432.995	64.772	1615.394	17.22
Ecad MO CO	Complete Overlap	h5b1	10.645	492.356	40.766	1874.891	17.22
Ecad MO CO	Complete Overlap	h5b1	10.645	505.613	25.438	2008.085	17.22
Ecad MO CO	Complete Overlap	h5b1	10.645	494.572	69.866	2170.712	17.22
Ecad MO CO	Complete Overlap	h5b1	10.645	467.32	63.328	2171.535	17.22
Ecad MO CO	Complete Overlap	h5b1	10.645	447.752	61.084	1368.687	17.22
Ecad MO CO	Complete Overlap	h5b1	10.537	522.087	61.181	2635.455	17.044
Ecad MO CO	Complete Overlap	h5b1	10.537	535.235	100.934	3529.238	17.044
Ecad MO CO	Complete Overlap	h5b1	10.537	573.921	77.421	2534.349	17.044
Ecad MO CO	Complete Overlap	h5b1	10.537	593.55	102.043	2929.496	17.044
Ecad MO CO	Complete Overlap	h5b1	10.537	428.916	87.618	1596.553	17.044
Ecad MO CO	Complete Overlap
Ecad MO CO	Complete Overlap	h5b2	11.563	375.84	32.239	1511.399	18.703
Ecad MO CO	Complete Overlap	h5b2	11.563	462.52	29.57	2168.686	18.703
Ecad MO CO	Complete Overlap	h5b2	11.563	513.775	69.569	2797.546	18.703
Ecad MO CO	Complete Overlap	h5b2	11.563	545.883	95.535	3228.665	18.703
Ecad MO CO	Complete Overlap	h5b2	11.455	694.315	132.71	2616.063	18.529
Ecad MO CO	Complete Overlap	h5b2	11.455	629.138	163.365	2625.867	18.529
Ecad MO CO	Complete Overlap	h5b2	11.455	601.956	83.788	2835.098	18.529
Ecad MO CO	Complete Overlap	h5b2	11.455	596.613	76.84	2289.629	18.529
Ecad MO CO	Complete Overlap	h5b2	11.455	542.655	23.607	1761.552	18.529
Ecad MO CO	Complete Overlap
Ecad MO CO	Complete Overlap	h5b3	5.674	310.188	38.357	909.57	9.137
Ecad MO CO	Complete Overlap	h5b3	5.674	385.189	42.929	1132.09	9.137
Ecad MO CO	Complete Overlap	h5b3	5.674	451.441	70.619	1634.501	9.137
Ecad MO CO	Complete Overlap	h5b3	5.674	492.054	77.357	1676.557	9.137
Ecad MO CO	Complete Overlap	h5b3	5.674	477.338	96.831	1778.745	9.137
Ecad MO CO	Complete Overlap	h5b3	5.674	503.249	84.832	1943.926	9.137
Ecad MO CO	Complete Overlap	h5b3	5.674	452.654	73.055	1533.395	9.137
Ecad MO CO	Complete Overlap
Ecad MO CO	Complete Overlap	h5b4	5.89	474.698	69.064	1256.049	9.489
Ecad MO CO	Complete Overlap	h5b4	5.89	529.461	68.213	1287.592	9.489
Ecad MO CO	Complete Overlap	h5b4	5.89	531.92	74.305	1376.241	9.489
Ecad MO CO	Complete Overlap	h5b4	5.89	545.343	109.419	1585.197	9.489
Ecad MO CO	Complete Overlap	h5b4	5.89	521.005	60.033	1801.185	9.489
Ecad MO CO	Complete Overlap	h5b4	5.89	538.584	56.404	2179.839	9.489
Ecad MO CO	Complete Overlap	h5b4	5.89	554.66	52.162	2732.886	9.489
Ecad MO CO	Complete Overlap	h5b4	5.89	553.666	55.511	2106.575	9.489
Ecad MO CO	Complete Overlap	h5b4	5.89	530.328	65.715	1906.471	9.489
Ecad MO CO	Complete Overlap
Ecad MO CO	Complete Overlap	h5b5	8.159	387.091	44.588	1675.723	13.179
Ecad MO CO	Complete Overlap	h5b5	8.159	445.345	61.914	1981.101	13.179
Ecad MO CO	Complete Overlap	h5b5	8.159	431.574	71.907	2303.044	13.179
Ecad MO CO	Complete Overlap	h5b5	8.159	404.006	51.45	2461.796	13.179
Ecad MO CO	Complete Overlap	h5b5	7.943	565.553	72.46	1761.806	12.827
Ecad MO CO	Complete Overlap	h5b5	7.943	430.316	89.063	1154.311	12.827
Ecad MO CO	Complete Overlap	h5b5	7.943	362.457	37.075	1305.186	12.827
Ecad MO CO	Complete Overlap	h5b5	8.321	593.259	84.784	1891.304	13.435
Ecad MO CO	Complete Overlap	h5b5	8.321	505.467	67.882	1574.093	13.435
Ecad MO CO	Complete Overlap	h5b5	8.321	370.378	39.819	1527.413	13.435
Ecad MO CO	Complete Overlap	h6b1	10.104	234.786	2.462	619.725	16.342
Ecad MO CO	Complete Overlap	h6b1	10.104	266.717	37.238	756.966	16.342
Ecad MO CO	Complete Overlap	h6b1	10.104	291.851	40.068	1228.597	16.342
Ecad MO CO	Complete Overlap	h6b1	10.104	299.631	37.883	1134.358	16.342
Ecad MO CO	Complete Overlap	h6b1	10.104	301.581	35.972	1161.529	16.342
Ecad MO CO	Complete Overlap	h6b1	10.104	320.947	27.836	1195.419	16.342
Ecad MO CO	Complete Overlap	h6b1	10.104	306.524	48.538	1942.829	16.342
Ecad MO CO	Complete Overlap
Ecad MO CO	Complete Overlap
Ecad MO CO	Complete Overlap	h6b2	10.807	143.086	13.354	476.848	17.484
Ecad MO CO	Complete Overlap	h6b2	10.807	192.619	21.283	587.855	17.484
Ecad MO CO	Complete Overlap	h6b2	10.807	226.523	32.979	730.711	17.484
Ecad MO CO	Complete Overlap	h6b2	10.807	238.533	30.881	666.152	17.484
Ecad MO CO	Complete Overlap	h6b2	10.807	248.467	24.741	788.079	17.484
Ecad MO CO	Complete Overlap	h6b2	10.807	288.044	26.179	1414.682	17.484
Ecad MO CO	Complete Overlap	h6b2	10.807	306.135	52.25	1742.329	17.484
Ecad MO CO	Complete Overlap	h6b2	10.807	340.771	27.057	2150.024	17.484
Ecad MO CO	Complete Overlap	h6b2	10.807	335.644	37.501	2212.509	17.484
Ecad MO CO	Complete Overlap
Ecad MO CO	Complete Overlap	h6b3	10.104	308.793	30.088	888.546	16.342
Ecad MO CO	Complete Overlap	h6b3	10.104	357.075	61.134	1466.717	16.342
Ecad MO CO	Complete Overlap	h6b3	10.104	372.193	34.926	1785.379	16.342
Ecad MO CO	Complete Overlap	h6b3	10.104	368.448	31.856	1928.493	16.342
Ecad MO CO	Complete Overlap	h6b3	10.104	349.349	55.1	1695.509	16.342
Ecad MO CO	Complete Overlap	h6b3	10.104	271.216	25.562	1763.461	16.342
Ecad MO CO	Complete Overlap	h7b1	8.321	409.819	54.303	1220.718	13.442
Ecad MO CO	Complete Overlap	h7b1	8.321	416.166	55.631	1501.567	13.442
Ecad MO CO	Complete Overlap	h7b1	8.321	379.222	90.963	1623.149	13.442
Ecad MO CO	Complete Overlap	h7b1	8.321	349.646	67.611	1611.075	13.442
Ecad MO CO	Complete Overlap	h7b1	8.321	275.147	33.984	1082.614	13.442
Ecad MO CO	Complete Overlap
Ecad MO CO	Complete Overlap	h7b2	7.889	320.244	53.76	848.159	12.739
Ecad MO CO	Complete Overlap	h7b2	7.889	394.937	69.952	862.216	12.739
Ecad MO CO	Complete Overlap	h7b2	7.889	435.985	34.004	1209.905	12.739
Ecad MO CO	Complete Overlap	h7b2	7.889	450.287	60.335	1373.048	12.739
Ecad MO CO	Complete Overlap	h7b2	7.889	358.793	45.983	996.542	12.739
Ecad MO CO	Complete Overlap	h7b2	7.889	313.915	61.409	887.156	12.739
Ecad MO CO	Complete Overlap	h7b2	7.889	276.305	51.05	801.339	12.739
Ecad MO CO	Complete Overlap
Ecad MO CO	Complete Overlap	h7b3	8.321	204.054	20.111	741.847	13.434
Ecad MO CO	Complete Overlap	h7b3	8.321	253.686	30.293	931.189	13.434
Ecad MO CO	Complete Overlap	h7b3	8.321	253.141	39.892	1154.442	13.434
Ecad MO CO	Complete Overlap	h7b3	8.808	491.492	73.707	1712.503	14.232
Ecad MO CO	Complete Overlap	h7b3	8.808	415.593	65.981	1700.563	14.232
Ecad MO CO	Complete Overlap	h7b3	8.808	377.737	39.39	1911.502	14.232
Ecad MO CO	Complete Overlap	h7b3	8.808	331.857	31.196	1987.76	14.232
Ecad MO CO	Complete Overlap
Ecad MO CO	Complete Overlap	h7b4	3.404	323.84	34.173	1670.059	5.447
Ecad MO CO	Complete Overlap	h7b4	3.404	363.738	30.047	2283.651	5.447
Ecad MO CO	Complete Overlap	h7b4	3.404	373.485	54.05	1902.152	5.447
Ecad MO CO	Complete Overlap	h7b4	3.404	324.197	65.253	990.682	5.447
Ecad MO CO	Complete Overlap	h7b4	3.404	251.408	31.598	884.373	5.447
Ecad MO CO	Complete Overlap	h7b4	3.404	192.364	7.406	531.172	5.447
Ecad MO CO	Complete Overlap
Ecad MO CO	Complete Overlap	h7b5	11.833	270.271	24.716	1104.806	19.153
Ecad MO CO	Complete Overlap	h7b5	11.833	334.926	42.835	1242.338	19.153
Ecad MO CO	Complete Overlap	h7b5	11.833	415.972	78.114	1230.6	19.153
Ecad MO CO	Complete Overlap	h7b5	11.833	356.452	62.01	1444.571	19.153
Ecad MO CO	Complete Overlap	h7b5	11.833	281.292	52.029	1214.152	19.153
Ecad MO CO	Complete Overlap	h7b5	11.833	224.237	13.272	1280.545	19.153
Ecad MO CO	Complete Overlap	h7b5	11.833	184.172	19.841	1406.612	19.153
Ecad MO CO	Complete Overlap
Ecad MO CO	Complete Overlap	h7b6	9.132	339.226	52.042	841.874	14.76
Ecad MO CO	Complete Overlap	h7b6	9.132	380.571	45.836	1344.864	14.76
Ecad MO CO	Complete Overlap	h7b6	9.132	417.093	67.057	1597.256	14.76
Ecad MO CO	Complete Overlap	h7b6	9.132	413.177	63.7	1221.415	14.76
Ecad MO CO	Complete Overlap	h7b6	9.132	403.51	53.035	1460.676	14.76
Ecad MO CO	Complete Overlap	h7b6	9.132	366.518	44.913	1617.876	14.76
Ecad MO CO	Complete Overlap
Ecad MO CO	Complete Overlap	h7b7	3.782	344.177	49.174	1126.784	6.062
Ecad MO CO	Complete Overlap	h7b7	3.782	380.362	22.603	1424.346	6.062
Ecad MO CO	Complete Overlap	h7b7	3.782	345.025	57.586	1394.089	6.062
Ecad MO CO	Complete Overlap	h7b7	3.782	310.651	77.666	1013.955	6.062
Ecad MO CO	Complete Overlap	h7b7	3.782	291.632	79.535	977.247	6.062
Ecad MO CO	Complete Overlap	h7b7	3.782	245.79	36.962	1081.483	6.062
Ecad MO CO	Complete Overlap
Ecad MO CO	Complete Overlap	h7b8	11.401	166.787	19.187	504.902	18.45
Ecad MO CO	Complete Overlap	h7b8	11.401	252.535	23.033	868.792	18.45
Ecad MO CO	Complete Overlap	h7b8	11.401	330.778	36.342	1679.617	18.45
Ecad MO CO	Complete Overlap	h7b8	11.401	380.128	76.104	1431.346	18.45
Ecad MO CO	Complete Overlap	h7b8	11.401	334.658	44.869	1290.986	18.45
Ecad MO CO	Complete Overlap	h7b8	11.401	274.421	36.935	977.352	18.45
Ecad MO CO	Complete Overlap	h7b8	11.401	211.407	14.332	869.643	18.45
Ecad MO CO	Complete Overlap
Ecad MO CO	Complete Overlap	h7b9	9.564	244.339	25.114	842.318	15.463
Ecad MO CO	Complete Overlap	h7b9	9.564	342.316	49.899	1118.376	15.463
Ecad MO CO	Complete Overlap	h7b9	9.564	396.792	33.931	1104.752	15.463
Ecad MO CO	Complete Overlap	h7b9	9.564	411.651	29.95	1636.165	15.463
Ecad MO CO	Complete Overlap	h7b9	9.564	408.05	58.417	1078.919	15.463
Ecad MO CO	Complete Overlap	h7b9	9.564	365.573	68.79	937.377	15.463
Ecad MO CO	Complete Overlap	h7b9	9.564	281.175	45.246	1980.019	15.463
Ecad MO CO	Complete Overlap
Ecad MO CO	Complete Overlap	h7b10	5.511	408.728	58.123	1402.39	8.873
Ecad MO CO	Complete Overlap	h7b10	5.511	477.755	83.368	1711.107	8.873
Ecad MO CO	Complete Overlap	h7b10	5.511	484.044	77.876	1389.818	8.873
Ecad MO CO	Complete Overlap	h7b10	5.511	464.589	74.81	1461.356	8.873
Ecad MO CO	Complete Overlap	h7b10	5.511	387.656	61.309	1011.227	8.873
Ecad MO CO	Complete Overlap	h8b1	13.076	194.68	22.782	889.679	21.171
Ecad MO CO	Complete Overlap	h8b1	13.076	187.567	16.318	1325.461	21.171
Ecad MO CO	Complete Overlap	h8b1	13.076	174.441	3.346	979.348	21.171
Ecad MO CO	Complete Overlap	h8b1	13.076	169.861	5.1	837.812	21.171
Ecad MO CO	Complete Overlap	h8b1	13.076	168.424	2.699	744.255	21.171
Ecad MO CO	Complete Overlap	h8b1	13.076	165.879	4.322	956.782	21.171
Ecad MO CO	Complete Overlap
Ecad MO CO	Complete Overlap	h8b2	12.32	181.435	17.776	777.724	19.944
Ecad MO CO	Complete Overlap	h8b2	12.32	176.968	10.315	904.263	19.944
Ecad MO CO	Complete Overlap	h8b2	12.32	172.094	1.37	771.298	19.944
Ecad MO CO	Complete Overlap	h8b2	12.32	156.505	7.118	796.587	19.944
Ecad MO CO	Complete Overlap	h8b2	13.509	189.437	16.836	1662.16	21.877
Ecad MO CO	Complete Overlap	h8b2	13.509	133.071	2.145	858.211	21.877
Ecad MO CO	Complete Overlap	h8b2	13.509	111.988	1.752	442.649	21.877
Ecad MO CO	Complete Overlap	h8b2	13.509	86.352	1.158	472.73	21.877
Ecad MO CO	Complete Overlap	h8b2	13.509	66.992	0.197	373.687	21.877
Ecad MO CO	Complete Overlap
Ecad MO CO	Complete Overlap	h8b3	7.835	151.515	6.036	816.642	12.652
Ecad MO CO	Complete Overlap	h8b3	7.835	103.297	1.529	392.384	12.652
Ecad MO CO	Complete Overlap	h8b3	7.835	66.514	2.066	415.648	12.652
Ecad MO CO	Complete Overlap	h8b3	7.835	44.847	0.083	217.964	12.652
Ecad MO CO	Complete Overlap	h8b3	7.835	37.771	0.022	239.171	12.652
Ecad MO CO	Complete Overlap	h8b3	7.835	30.649	0	268.092	12.652
Ecad MO CO	Complete Overlap
Ecad MO CO	Complete Overlap	h8b4	8.537	165.234	3.283	1751.257	13.794
Ecad MO CO	Complete Overlap	h8b4	8.537	140.613	0.373	1049.101	13.794
Ecad MO CO	Complete Overlap	h8b4	8.537	79.318	1.173	416.667	13.794
Ecad MO CO	Complete Overlap	h8b4	8.537	65.163	0.285	341.331	13.794
Ecad MO CO	Complete Overlap	h8b4	8.537	51.873	0.142	272.456	13.794
Ecad MO CO	Complete Overlap
Ecad MO CO	Complete Overlap	h8b5	6.754	166.801	30.957	659.434	10.894
Ecad MO CO	Complete Overlap	h8b5	6.754	156.406	15.228	541.465	10.894
Ecad MO CO	Complete Overlap	h8b5	6.754	134.734	9.716	796.87	10.894
Ecad MO CO	Complete Overlap	h8b5	6.754	110.525	1.786	770.966	10.894
Ecad MO CO	Complete Overlap	h8b5	6.754	95.131	1.728	490.493	10.894
Ecad MO CO	Complete Overlap	h8b5	6.754	77.436	1.795	355.804	10.894
Ecad MO CO	Complete Overlap	h8b5	6.754	53.51	0.145	261.195	10.894
Ecad MO CO	Complete Overlap
Ecad MO CO	Complete Overlap	h8b6	10.645	141.27	2.689	538.767	17.22
Ecad MO CO	Complete Overlap	h8b6	10.645	148.852	3.897	911.409	17.22
Ecad MO CO	Complete Overlap	h8b6	10.645	114.552	6.004	622.304	17.22
Ecad MO CO	Complete Overlap	h8b6	10.645	89.64	3.031	317.831	17.22
Ecad MO CO	Complete Overlap	h8b6	10.645	78.349	3.526	316.336	17.22
Ecad MO CO	Complete Overlap	h8b6	10.645	69.752	2.229	308.218	17.22
Ecad MO CO	Complete Overlap	h8b6	10.645	61.138	1.46	315.17	17.22
Ecad MO CO	Complete Overlap	h8b6	10.645	59.401	0.025	420.733	17.22
Ecad MO CO	Complete Overlap
Ecad MO CO	Complete Overlap	h8b7	10.645	166.272	15.748	679.62	17.22
Ecad MO CO	Complete Overlap	h8b7	10.645	153.888	4.307	697.133	17.22
Ecad MO CO	Complete Overlap	h8b7	10.645	140.217	5.91	973.665	17.22
Ecad MO CO	Complete Overlap	h8b7	10.645	124.048	3.774	653.673	17.22
Ecad MO CO	Complete Overlap	h8b7	10.645	110.127	10.184	477.937	17.22
Ecad MO CO	Complete Overlap	h8b7	10.645	96.994	5.716	465.009	17.22
Ecad MO CO	Complete Overlap
Ecad MO CO	Complete Overlap	h8b8	9.348	140.381	6.996	650.802	15.112
Ecad MO CO	Complete Overlap	h8b8	9.348	175.132	3.346	1141.495	15.112
Ecad MO CO	Complete Overlap	h8b8	9.348	163.926	6.092	771.662	15.112
Ecad MO CO	Complete Overlap	h8b8	9.348	138.742	6.581	586.022	15.112
Ecad MO CO	Complete Overlap	h8b8	9.348	104.803	13.592	574.903	15.112
Ecad MO CO	Complete Overlap	h8b8	9.348	89.403	5.539	479.206	15.112
Ecad MO PO	Partial Overlap	h2b1	14.913	450.47	28.304	1982.323	24.161
Ecad MO PO	Partial Overlap	h2b1	14.913	488.698	8.122	3779.087	24.161
Ecad MO PO	Partial Overlap	h2b1	14.913	432.575	55.23	3143.215	24.161
Ecad MO PO	Partial Overlap	h2b1	14.913	357.632	11.861	2169.877	24.161
Ecad MO PO	Partial Overlap
Ecad MO PO	Partial Overlap	h2b2	6.214	303.847	44.847	939.842	10.016
Ecad MO PO	Partial Overlap	h2b2	6.214	354.726	37.363	1169.713	10.016
Ecad MO PO	Partial Overlap	h2b2	6.214	383.566	55.693	1594.228	10.016
Ecad MO PO	Partial Overlap	h2b2	6.268	652.26	133.088	2014.655	10.104
Ecad MO PO	Partial Overlap	h2b2	6.268	730.589	76.862	4095	10.104
Ecad MO PO	Partial Overlap	h2b2	6.268	639.366	77.197	3887.45	10.104
Ecad MO PO	Partial Overlap	h2b2	6.268	423.365	27.381	2025.856	10.104
Ecad MO PO	Partial Overlap	h3b1	13.455	318.381	60.693	1178.35	21.789
Ecad MO PO	Partial Overlap	h3b1	13.455	377.184	54.578	1087.53	21.789
Ecad MO PO	Partial Overlap	h3b1	13.455	398.221	73.27	1452.39	21.789
Ecad MO PO	Partial Overlap	h3b1	13.455	396.962	90.024	1512.358	21.789
Ecad MO PO	Partial Overlap	h3b1	13.455	367.592	58.461	2237.456	21.789
Ecad MO PO	Partial Overlap	h3b1	13.455	300.945	43.371	1199.146	21.789
Ecad MO PO	Partial Overlap
Ecad MO PO	Partial Overlap	h3b2	10.483	500.364	126.837	2737.232	16.957
Ecad MO PO	Partial Overlap	h3b2	10.483	421.807	132.851	2251.807	16.957
Ecad MO PO	Partial Overlap	h3b2	10.537	575.651	131.464	2622.953	17.045
Ecad MO PO	Partial Overlap	h3b2	10.537	548.839	72.778	1658.492	17.045
Ecad MO PO	Partial Overlap	h3b2	10.537	522.13	55.312	2462.111	17.045
Ecad MO PO	Partial Overlap	h3b2	10.537	415.619	48.461	2241.64	17.045
Ecad MO PO	Partial Overlap
Ecad MO PO	Partial Overlap	h3b3	10.483	272.432	11.367	886.955	16.957
Ecad MO PO	Partial Overlap	h3b3	10.483	318.051	22.977	997.317	16.957
Ecad MO PO	Partial Overlap	h3b3	10.483	340.592	49.289	1064.731	16.957
Ecad MO PO	Partial Overlap	h3b3	10.483	347.185	35.047	1355.543	16.957
Ecad MO PO	Partial Overlap	h3b3	9.942	444.389	110.214	1174.531	16.078
Ecad MO PO	Partial Overlap	h3b3	9.942	469.03	52.516	1594.709	16.078
Ecad MO PO	Partial Overlap	h3b3	9.942	471.519	85.655	1563.765	16.078
Ecad MO PO	Partial Overlap	h3b3	9.942	410.111	25.371	1305.795	16.078
Ecad MO PO	Partial Overlap	h3b3	9.942	324.733	48.378	1757.022	16.078
Ecad MO PO	Partial Overlap
Ecad MO PO	Partial Overlap	h3b4	11.996	351.995	65.227	1388.055	19.417
Ecad MO PO	Partial Overlap	h3b4	11.996	381.471	78.657	1883.042	19.417
Ecad MO PO	Partial Overlap	h3b4	11.996	414.084	49.014	1332.686	19.417
Ecad MO PO	Partial Overlap	h3b4	11.996	496.637	79.442	2059.52	19.417
Ecad MO PO	Partial Overlap	h3b4	10.591	554.19	65.81	3235.153	17.105
Ecad MO PO	Partial Overlap	h3b4	10.591	530.303	100.278	3641.6	17.105
Ecad MO PO	Partial Overlap	h3b4	10.591	447.451	62.2	1877.015	17.105
Ecad MO PO	Partial Overlap	h4b1	8.537	249.62	3.947	1145.671	13.794
Ecad MO PO	Partial Overlap	h4b1	8.537	277.05	11.608	1140.979	13.794
Ecad MO PO	Partial Overlap	h4b1	8.537	301.586	31.368	1597.776	13.794
Ecad MO PO	Partial Overlap	h4b1	8.537	353.084	53.306	2475.269	13.794
Ecad MO PO	Partial Overlap	h4b1	8.537	410.4	60.012	2034.375	13.794
Ecad MO PO	Partial Overlap	h4b1	8.537	539.254	89.814	1966.816	13.794
Ecad MO PO	Partial Overlap	h4b1	8.537	536.363	94.189	1949.165	13.794
Ecad MO PO	Partial Overlap	h4b1	8.537	437.424	80.535	1736.764	13.794
Ecad MO PO	Partial Overlap
Ecad MO PO	Partial Overlap	h4b2	8.97	566.75	109.089	1931.798	14.497
Ecad MO PO	Partial Overlap	h4b2	8.97	578.527	117.823	1702.346	14.497
Ecad MO PO	Partial Overlap	h4b2	8.97	570.434	134.885	1493.873	14.497
Ecad MO PO	Partial Overlap	h4b2	8.97	576.88	118.67	1591.677	14.497
Ecad MO PO	Partial Overlap	h4b2	8.97	567.004	109.352	2066.236	14.497
Ecad MO PO	Partial Overlap
Ecad MO PO	Partial Overlap	h4b3	6.97	476.076	109.007	1539.884	11.246
Ecad MO PO	Partial Overlap	h4b3	6.97	527.121	108.931	2066.85	11.246
Ecad MO PO	Partial Overlap	h4b3	6.97	581.11	117.891	1951.343	11.246
Ecad MO PO	Partial Overlap	h4b3	6.97	561.116	58.255	1753.795	11.246
Ecad MO PO	Partial Overlap	h4b3	6.484	562.544	87.326	1600.977	10.455
Ecad MO PO	Partial Overlap	h4b3	6.484	430.023	96.047	1776.815	10.455
Ecad MO PO	Partial Overlap	h4b3	6.484	303.8	65.697	1449.178	10.455
Ecad MO PO	Partial Overlap
Ecad MO PO	Partial Overlap	h4b4	12.536	439.628	41.664	1600.785	20.295
Ecad MO PO	Partial Overlap	h4b4	12.536	519.119	56.452	2066.32	20.295
Ecad MO PO	Partial Overlap	h4b4	12.536	591.724	64.72	2420.117	20.295
Ecad MO PO	Partial Overlap	h4b4	12.536	634.145	74.83	2375.784	20.295
Ecad MO PO	Partial Overlap	h4b4	12.536	545.234	89.04	1981.154	20.295
Ecad MO PO	Partial Overlap	h4b4	11.779	736.446	130.375	3535.277	19.065
Ecad MO PO	Partial Overlap	h4b4	11.779	690.294	110.21	3800.881	19.065
Ecad MO PO	Partial Overlap	h4b4	11.779	494.024	102.717	1763.13	19.065
Ecad MO PO	Partial Overlap
Ecad MO PO	Partial Overlap	h4b5	8.159	244.394	18.605	785.262	13.178
Ecad MO PO	Partial Overlap	h4b5	8.159	378.304	41.94	1016.911	13.178
Ecad MO PO	Partial Overlap	h4b5	8.159	486.574	82.453	1230.971	13.178
Ecad MO PO	Partial Overlap	h4b5	8.159	587.18	56.482	1405.337	13.178
Ecad MO PO	Partial Overlap	h4b5	8.159	597.033	86.396	1445.241	13.178
Ecad MO PO	Partial Overlap	h4b5	8.159	581.925	74.975	1429.057	13.178
Ecad MO PO	Partial Overlap	h4b5	8.159	563.655	76.375	1567.461	13.178
Ecad MO PO	Partial Overlap	h4b5	9.078	408.931	57.046	1505.195	14.672
Ecad MO PO	Partial Overlap	h4b5	9.078	296.763	21.607	1026.747	14.672
Ecad MO PO	Partial Overlap	h4b5	9.078	223.937	14.882	884.636	14.672
Ecad MO PO	Partial Overlap	h5b1	6.484	368.899	40.829	1665.371	10.455
Ecad MO PO	Partial Overlap	h5b1	6.484	395.308	79.776	2204.681	10.455
Ecad MO PO	Partial Overlap	h5b1	6.484	434.536	70.564	3073.974	10.455
Ecad MO PO	Partial Overlap	h5b1	6.484	477.547	101.849	1711.047	10.455
Ecad MO PO	Partial Overlap	h5b1	6.484	531.42	112.766	1605.956	10.455
Ecad MO PO	Partial Overlap	h5b1	6.484	523.117	91.662	1484.524	10.455
Ecad MO PO	Partial Overlap	h5b1	6.106	554.774	121.573	1698.229	9.838
Ecad MO PO	Partial Overlap	h5b1	6.106	586.228	85.045	2374.946	9.838
Ecad MO PO	Partial Overlap	h5b1	6.106	700.827	140.828	3775.522	9.838
Ecad MO PO	Partial Overlap
Ecad MO PO	Partial Overlap	h5b2	7.024	295.481	17.011	1772.609	11.333
Ecad MO PO	Partial Overlap	h5b2	7.024	363.738	24.465	2845.45	11.333
Ecad MO PO	Partial Overlap	h5b2	7.024	423.307	62.268	2729.677	11.333
Ecad MO PO	Partial Overlap	h5b2	7.024	500.688	77.663	3309.9	11.333
Ecad MO PO	Partial Overlap	h5b2	7.024	588.523	104.778	2074.262	11.333
Ecad MO PO	Partial Overlap	h5b2	7.024	668.209	143.428	1753.563	11.333
Ecad MO PO	Partial Overlap	h5b2	7.024	672.656	145.561	1817.045	11.333
Ecad MO PO	Partial Overlap	h5b2	7.024	625.212	118.731	2337.753	11.333
Ecad MO PO	Partial Overlap	h5b2	6.376	373.728	38.375	1233.028	10.279
Ecad MO PO	Partial Overlap	h5b2	6.376	406.086	83.331	1614.553	10.279
Ecad MO PO	Partial Overlap	h5b2	6.376	359.593	65.864	1888.664	10.279
Ecad MO PO	Partial Overlap	h5b2	6.376	346.102	50.305	1937.045	10.279
Ecad MO PO	Partial Overlap
Ecad MO PO	Partial Overlap	h5b3	8.105	316.514	7.36	1451.24	13.091
Ecad MO PO	Partial Overlap	h5b3	8.105	379.328	38.637	2051.152	13.091
Ecad MO PO	Partial Overlap	h5b3	8.105	411.932	55.47	2259.172	13.091
Ecad MO PO	Partial Overlap	h5b3	8.105	435.948	62.107	2472.838	13.091
Ecad MO PO	Partial Overlap	h5b3	8.105	487.958	77.976	2635.935	13.091
Ecad MO PO	Partial Overlap	h5b3	8.105	598.202	91.576	1817.196	13.091
Ecad MO PO	Partial Overlap	h5b3	8.105	637.172	93.08	2739.5	13.091
Ecad MO PO	Partial Overlap	h5b3	8.105	595.582	70.295	1639.522	13.091
Ecad MO PO	Partial Overlap	h5b3	8.105	461.278	45.039	2956.724	13.091
Ecad MO PO	Partial Overlap	h6b1	5.025	312.855	49.701	1214.886	8.083
Ecad MO PO	Partial Overlap	h6b1	5.025	361.664	71.799	1348.643	8.083
Ecad MO PO	Partial Overlap	h6b1	5.025	427.516	93.586	1378.988	8.083
Ecad MO PO	Partial Overlap	h6b1	5.025	490.336	119.662	1214.585	8.083
Ecad MO PO	Partial Overlap	h6b1	5.025	489.673	107.471	1355.381	8.083
Ecad MO PO	Partial Overlap	h6b1	5.025	470.989	132.625	1664.134	8.083
Ecad MO PO	Partial Overlap	h6b1	5.025	388.637	55.123	1960.86	8.083
Ecad MO PO	Partial Overlap
Ecad MO PO	Partial Overlap	h6b2	7.133	232.631	1.25	999.036	11.509
Ecad MO PO	Partial Overlap	h6b2	7.133	273.748	0.323	1005.463	11.509
Ecad MO PO	Partial Overlap	h6b2	7.133	294.493	17.55	1108.554	11.509
Ecad MO PO	Partial Overlap	h6b2	7.133	306.47	23.637	1218.188	11.509
Ecad MO PO	Partial Overlap	h6b2	7.133	315.308	52.53	1051.182	11.509
Ecad MO PO	Partial Overlap	h6b2	7.133	311.441	59.457	1176.55	11.509
Ecad MO PO	Partial Overlap	h6b2	7.133	299.915	27.089	1298.396	11.509
Ecad MO PO	Partial Overlap
Ecad MO PO	Partial Overlap	h6b3	8.267	277.329	37.509	815.81	13.355
Ecad MO PO	Partial Overlap	h6b3	8.267	341.793	36.88	845.863	13.355
Ecad MO PO	Partial Overlap	h6b3	8.267	365.914	35.6	859.839	13.355
Ecad MO PO	Partial Overlap	h6b3	8.267	372.98	45.954	945.189	13.355
Ecad MO PO	Partial Overlap	h6b3	8.267	325.092	51.935	943.104	13.355
Ecad MO PO	Partial Overlap	h6b3	8.267	314.057	51.578	876.046	13.355
Ecad MO PO	Partial Overlap	h6b3	8.267	293.935	40.457	1136.16	13.355
Ecad MO PO	Partial Overlap
Ecad MO PO	Partial Overlap	h6b4	10.483	252.749	32.919	866.031	16.957
Ecad MO PO	Partial Overlap	h6b4	10.483	315.798	48.937	971.512	16.957
Ecad MO PO	Partial Overlap	h6b4	10.483	371.675	57.404	1223.607	16.957
Ecad MO PO	Partial Overlap	h6b4	10.483	407.011	87.752	1240.645	16.957
Ecad MO PO	Partial Overlap	h6b4	10.483	448.7	106.958	1432.391	16.957
Ecad MO PO	Partial Overlap	h6b4	10.483	524.272	121.762	3400.751	16.957
Ecad MO PO	Partial Overlap	h6b4	10.483	513.806	71.174	3183.123	16.957
Ecad MO PO	Partial Overlap	h6b4	10.483	461.584	50.85	3954.163	16.957
Ecad MO PO	Partial Overlap
Ecad MO PO	Partial Overlap	h6b5	8.105	446.859	105.05	1933.214	13.091
Ecad MO PO	Partial Overlap	h6b5	8.105	542.295	121.838	2930.625	13.091
Ecad MO PO	Partial Overlap	h6b5	8.105	618.528	103.279	3343.291	13.091
Ecad MO PO	Partial Overlap	h6b5	8.105	765.438	122.914	2603.162	13.091
Ecad MO PO	Partial Overlap	h6b5	8.105	776.867	80.528	3964.1	13.091
Ecad MO PO	Partial Overlap	h6b5	8.105	686.75	110.682	3574.375	13.091
Ecad MO PO	Partial Overlap	h6b5	8.105	497.313	49.23	1731.421	13.091
Ecad MO PO	Partial Overlap	h7b1	9.888	387.46	83.238	1327.479	15.99
Ecad MO PO	Partial Overlap	h7b1	9.888	412.975	102.884	1494.592	15.99
Ecad MO PO	Partial Overlap	h7b1	9.888	365.362	98.534	1178.276	15.99
Ecad MO PO	Partial Overlap	h7b1	8.483	430.571	123.727	1680.938	13.705
Ecad MO PO	Partial Overlap
Ecad MO PO	Partial Overlap	h7b2	10.645	340.18	25.453	1394.64	17.22
Ecad MO PO	Partial Overlap	h7b2	10.645	381.558	38.967	1327.692	17.22
Ecad MO PO	Partial Overlap	h7b2	10.645	353.231	59.846	1586.573	17.22
Ecad MO PO	Partial Overlap	h7b2	10.645	297.626	37.762	1426.567	17.22
Ecad MO PO	Partial Overlap	h7b2	9.996	407.173	36.604	1561.567	16.166
Ecad MO PO	Partial Overlap	h7b2	9.996	458.401	66.601	2016.526	16.166
Ecad MO PO	Partial Overlap
Ecad MO PO	Partial Overlap	h7b3	4.431	271.125	13.52	1254.455	7.117
Ecad MO PO	Partial Overlap	h7b3	4.431	299.279	18.856	1105.587	7.117
Ecad MO PO	Partial Overlap	h7b3	4.431	327.425	68.72	1126.431	7.117
Ecad MO PO	Partial Overlap	h7b3	4.431	410.273	56.402	3861.945	7.117
Ecad MO PO	Partial Overlap	h7b3	4.431	350.689	21.734	2954.527	7.117
Ecad MO PO	Partial Overlap
Ecad MO PO	Partial Overlap	h7b4	7.943	331.941	21.246	1453.587	12.827
Ecad MO PO	Partial Overlap	h7b4	7.943	354.386	45.373	1918.582	12.827
Ecad MO PO	Partial Overlap	h7b4	7.943	358.05	57.414	1431.882	12.827
Ecad MO PO	Partial Overlap	h7b4	7.943	352.797	64.805	1182.254	12.827
Ecad MO PO	Partial Overlap	h7b4	7.943	331.608	53.291	1423.341	12.827
Ecad MO PO	Partial Overlap	h8b1	8.645	319.738	48.532	2369.244	13.97
Ecad MO PO	Partial Overlap	h8b1	8.645	266.577	34.207	1958.281	13.97
Ecad MO PO	Partial Overlap	h8b1	8.645	190.768	4.014	1097.002	13.97
Ecad MO PO	Partial Overlap	h8b1	8.645	121.895	1.408	735.412	13.97
Ecad MO PO	Partial Overlap
Ecad MO PO	Partial Overlap	h8b2	9.132	417.632	47.142	3301.765	14.76
Ecad MO PO	Partial Overlap	h8b2	9.132	379.192	46.197	2003.552	14.76
Ecad MO PO	Partial Overlap	h8b2	9.132	273.006	11.179	1214.425	14.76
Ecad MO PO	Partial Overlap	h8b2	9.132	195.096	10.05	1154.388	14.76
Ecad MO PO	Partial Overlap	h8b2	9.132	146.885	10.392	1972.942	14.76
Ecad MO PO	Partial Overlap	h8b2	9.132	95.104	2.711	1242.51	14.76
Ecad MO PO	Partial Overlap
Ecad MO PO	Partial Overlap	h8b3	10.321	405.458	27.052	2065.454	16.693
Ecad MO PO	Partial Overlap	h8b3	10.321	356.765	41.748	1759.557	16.693
Ecad MO PO	Partial Overlap	h8b3	11.131	358.286	44.921	3216.925	18.011
Ecad MO PO	Partial Overlap	h8b3	11.131	271.738	37.779	1016.848	18.011
Ecad MO PO	Partial Overlap	h8b3	11.131	216.266	31.056	1613.334	18.011
Ecad MO PO	Partial Overlap	h8b3	11.131	185.198	24.163	1873.825	18.011
Ecad MO PO	Partial Overlap	h8b3	11.131	169.252	7.663	1975.123	18.011
Ecad MO PO	Partial Overlap
Ecad MO PO	Partial Overlap	h8b4	10.699	520.934	58.158	2483.771	17.308
Ecad MO PO	Partial Overlap	h8b4	10.699	476.627	71.069	4071.975	17.308
Ecad MO PO	Partial Overlap	h8b4	10.699	328.948	45.042	2695.664	17.308
Ecad MO PO	Partial Overlap	h8b4	10.699	245.249	13.961	2401.222	17.308
Ecad MO PO	Partial Overlap	h8b4	10.699	197.131	19.444	1399.733	17.308
Ecad MO PO	Partial Overlap	h8b4	10.699	150.827	5.046	582.898	17.308
Ecad MO PO	Partial Overlap
Ecad MO PO	Partial Overlap	h8b5	18.966	382.116	10.963	1999.739	30.75
Ecad MO PO	Partial Overlap	h8b5	18.966	387.771	19.863	3098.475	30.75
Ecad MO PO	Partial Overlap	h8b5	18.966	384.502	19.961	3399.476	30.75
Ecad MO PO	Partial Overlap	h8b5	18.966	353.124	27.055	3577.486	30.75
Ecad MO PO	Partial Overlap	h8b5	18.966	243.803	10.959	2425.718	30.75
Ecad MO PO	Partial Overlap	h8b5	18.966	146.501	3.335	644.533	30.75
Ecad MO PO	Partial Overlap	h8b5	18.966	114.963	0.722	3663.782	30.75
Ecad MO PO	Partial Overlap
Ecad MO PO	Partial Overlap	h8b6	12.482	402.77	53.29	2894.124	20.207
Ecad MO PO	Partial Overlap	h8b6	12.482	396.31	59.284	2390.547	20.207
Ecad MO PO	Partial Overlap	h8b6	12.482	291.583	29.268	1122.864	20.207
Ecad MO PO	Partial Overlap	h8b6	12.482	235.079	29.513	904.347	20.207
Ecad MO PO	Partial Overlap
Ecad MO PO	Partial Overlap	h8b9	13.563	323.429	15.88	4095	21.965
Ecad MO PO	Partial Overlap	h8b9	13.563	308.842	16.509	4095	21.965
Ecad MO PO	Partial Overlap	h8b9	13.563	284.024	17.603	3581.533	21.965
Ecad MO PO	Partial Overlap	h8b9	13.563	237.914	24.034	1662.88	21.965
Ecad MO PO	Partial Overlap	h8b9	13.563	184.865	4.603	1811.249	21.965
Ecad MO PO	Partial Overlap	h8b9	13.563	151.352	5.896	1043.291	21.965
Ecad MO PO	Partial Overlap
Ecad MO PO	Partial Overlap	h8b10	10.212	433.773	14.887	2981.996	16.507
Ecad MO PO	Partial Overlap	h8b10	10.212	401.201	53.098	1424.977	16.507
Ecad MO PO	Partial Overlap	h8b10	10.212	362.144	16.883	1351.373	16.507
Ecad MO PO	Partial Overlap	h8b10	10.212	297.157	13.915	2127.807	16.507
Ecad MO PO	Partial Overlap	h8b10	10.212	276.866	8.333	1337.729	16.507
Ecad MO PO	Partial Overlap	h8b10	10.212	262.883	1.325	1349.709	16.507
Ecad MO PO	Partial Overlap	h8b10	10.212	237.013	6.044	1496.741	16.507
Ecad MO NO	No Overlap	h2b1	10.104	335.546	17.955	1263.626	16.342
Ecad MO NO	No Overlap	h2b1	10.104	411.808	31.81	1995.626	16.342
Ecad MO NO	No Overlap	h2b1	10.104	481.59	51.229	3052.444	16.342
Ecad MO NO	No Overlap	h2b1	10.375	595.61	70.139	2959.325	16.781
Ecad MO NO	No Overlap	h2b1	10.375	511.502	48.898	2618.441	16.781
Ecad MO NO	No Overlap	h2b1	10.375	439.852	42.861	4085.015	16.781
Ecad MO NO	No Overlap
Ecad MO NO	No Overlap	h2b2	11.239	300.141	41.497	902.832	18.187
Ecad MO NO	No Overlap	h2b2	11.239	386.536	30.23	1390.04	18.187
Ecad MO NO	No Overlap	h2b2	11.239	455.771	59.628	2072.711	18.187
Ecad MO NO	No Overlap	h2b2	11.239	476.822	73.56	2162.88	18.187
Ecad MO NO	No Overlap	h2b2	11.239	514.022	95.132	4005.294	18.187
Ecad MO NO	No Overlap
Ecad MO NO	No Overlap	h2b3	11.185	226.071	29.235	675.867	18.099
Ecad MO NO	No Overlap	h2b3	11.185	320.361	48.561	888.73	18.099
Ecad MO NO	No Overlap	h2b3	11.185	418.288	46.082	1407.406	18.099
Ecad MO NO	No Overlap	h2b3	11.185	462.824	58.839	1566.191	18.099
Ecad MO NO	No Overlap	h2b3	11.185	433.892	16.877	1975.641	18.099
Ecad MO NO	No Overlap	h2b3	11.185	388.742	13.619	3778.531	18.099
Ecad MO NO	No Overlap
Ecad MO NO	No Overlap	h2b4	6.7	261.154	29.665	672.414	10.802
Ecad MO NO	No Overlap	h2b4	6.7	388.539	49.366	1700.665	10.802
Ecad MO NO	No Overlap	h2b4	6.7	543.542	86.242	2170.366	10.802
Ecad MO NO	No Overlap	h2b4	6.7	604.122	117.106	3687.84	10.802
Ecad MO NO	No Overlap	h2b4	6.7	601.756	98.52	2938.245	10.802
Ecad MO NO	No Overlap	h2b4	6.7	599.163	116.624	3106.417	10.802
Ecad MO NO	No Overlap	h2b4	6.7	536.983	135.124	2617.277	10.802
Ecad MO NO	No Overlap
Ecad MO NO	No Overlap	h2b5	9.024	199.693	9.811	834.415	14.584
Ecad MO NO	No Overlap	h2b5	9.024	289.63	21.078	1029.282	14.584
Ecad MO NO	No Overlap	h2b5	9.024	401.48	29.32	1485.702	14.584
Ecad MO NO	No Overlap	h2b5	9.024	454.666	40.681	1663.368	14.584
Ecad MO NO	No Overlap	h2b5	9.024	424.833	78.467	2642.077	14.584
Ecad MO NO	No Overlap	h2b5	9.186	472.959	53.22	2299.823	14.848
Ecad MO NO	No Overlap	h2b5	9.186	454.327	51.828	2289.262	14.848
Ecad MO NO	No Overlap	h2b5	9.186	353.699	26.253	1463.002	14.848
Ecad MO NO	No Overlap	h2b5	9.186	212.089	3.042	1590.377	14.848
Ecad MO NO	No Overlap
Ecad MO NO	No Overlap	h2b6	9.132	270.1	26.242	1064.203	14.746
Ecad MO NO	No Overlap	h2b6	9.132	393.355	40.661	1903.142	14.746
Ecad MO NO	No Overlap	h2b6	9.132	467.653	77.23	2515.691	14.746
Ecad MO NO	No Overlap	h2b6	9.132	457.686	101.391	1664.144	14.746
Ecad MO NO	No Overlap	h2b6	9.078	523.434	73.583	1686.432	14.653
Ecad MO NO	No Overlap	h2b6	9.078	451.853	31.503	1613.489	14.653
Ecad MO NO	No Overlap	h3b1	9.726	434.223	54.587	1215.921	15.727
Ecad MO NO	No Overlap	h3b1	9.726	459.199	65.723	1371.91	15.727
Ecad MO NO	No Overlap	h3b1	9.726	467.45	25.097	1232.041	15.727
Ecad MO NO	No Overlap	h3b1	9.726	464.725	53.277	1779.525	15.727
Ecad MO NO	No Overlap	h3b1	9.618	626.837	90.503	2066.808	15.551
Ecad MO NO	No Overlap	h3b1	9.618	590.08	25.978	2970.913	15.551
Ecad MO NO	No Overlap
Ecad MO NO	No Overlap	h3b2	9.456	405.899	70.993	1911.964	15.287
Ecad MO NO	No Overlap	h3b2	9.456	423.284	35.336	1716.943	15.287
Ecad MO NO	No Overlap	h3b2	9.456	405.071	78.975	1312.514	15.287
Ecad MO NO	No Overlap	h3b2	9.456	368.822	94.571	1990.254	15.287
Ecad MO NO	No Overlap	h3b2	9.456	261.97	30.521	1835.866	15.287
Ecad MO NO	No Overlap
Ecad MO NO	No Overlap	h3b3	7.619	249.874	34.039	849.194	12.298
Ecad MO NO	No Overlap	h3b3	7.619	272.82	43.317	638.234	12.298
Ecad MO NO	No Overlap	h3b3	7.619	287.187	31.483	952.114	12.298
Ecad MO NO	No Overlap	h3b3	7.619	311.188	43.071	923.751	12.298
Ecad MO NO	No Overlap	h3b3	7.619	322.646	49.342	1314.041	12.298
Ecad MO NO	No Overlap	h3b3	7.619	264.187	45.905	842.942	12.298
Ecad MO NO	No Overlap
Ecad MO NO	No Overlap	h3b4	10.212	460.51	75.454	1238.725	16.517
Ecad MO NO	No Overlap	h3b4	10.212	477.682	114.236	1538.452	16.517
Ecad MO NO	No Overlap	h3b4	10.212	493.874	113.601	1327.659	16.517
Ecad MO NO	No Overlap	h3b4	10.212	513.218	44.543	1458.597	16.517
Ecad MO NO	No Overlap	h3b4	10.212	545.847	85.75	3101.598	16.517
Ecad MO NO	No Overlap	h3b4	10.212	418.806	16.49	3583.428	16.517
Ecad MO NO	No Overlap
Ecad MO NO	No Overlap	h3b5	9.456	503.313	89.756	1347.253	15.287
Ecad MO NO	No Overlap	h3b5	9.456	547.24	86.723	2133.016	15.287
Ecad MO NO	No Overlap	h3b5	9.456	539.635	73.614	1544.77	15.287
Ecad MO NO	No Overlap	h3b5	9.456	515.26	76.437	1357.372	15.287
Ecad MO NO	No Overlap	h3b5	9.51	632.702	55.769	2414.681	15.375
Ecad MO NO	No Overlap	h3b5	9.51	594.985	22.855	2773.602	15.375
Ecad MO NO	No Overlap	h3b5	9.51	542.931	12.145	3083.628	15.375
Ecad MO NO	No Overlap
Ecad MO NO	No Overlap	h3b6	6.214	352.946	11.764	1230.567	10.016
Ecad MO NO	No Overlap	h3b6	6.214	376.925	28.808	1340.799	10.016
Ecad MO NO	No Overlap	h3b6	6.214	421.846	59.586	1849.749	10.016
Ecad MO NO	No Overlap	h3b6	5.89	643.176	126.502	3446.705	9.489
Ecad MO NO	No Overlap	h3b6	5.89	661.524	136.017	3733.209	9.489
Ecad MO NO	No Overlap	h3b6	5.89	633.491	106.806	2763.582	9.489
Ecad MO NO	No Overlap	h3b6	5.89	518.152	67.492	1608.154	9.489
Ecad MO NO	No Overlap	h4b1	8.591	505.937	26.334	2701.595	13.881
Ecad MO NO	No Overlap	h4b1	8.591	559.832	20.369	3413.131	13.881
Ecad MO NO	No Overlap	h4b1	8.591	592.512	22.703	3180.956	13.881
Ecad MO NO	No Overlap	h4b1	8.591	597.393	9.371	3098.614	13.881
Ecad MO NO	No Overlap	h4b1	7.457	685.63	163.865	2235.422	12.03
Ecad MO NO	No Overlap	h4b1	7.457	645.913	96.722	1781.109	12.03
Ecad MO NO	No Overlap	h4b1	7.457	546.27	38.843	1864.792	12.03
Ecad MO NO	No Overlap	h4b1	7.457	383.096	11.372	1192.548	12.03
Ecad MO NO	No Overlap
Ecad MO NO	No Overlap	h4b2	11.671	305.931	33.328	1254.359	18.881
Ecad MO NO	No Overlap	h4b2	11.671	395.559	49.56	2283.272	18.881
Ecad MO NO	No Overlap	h4b2	11.671	418.401	53.055	2581.279	18.881
Ecad MO NO	No Overlap	h4b2	11.509	590.975	55.887	2430.317	18.609
Ecad MO NO	No Overlap	h4b2	11.509	640.647	82.682	2463.472	18.609
Ecad MO NO	No Overlap	h4b2	11.509	657.743	71.406	2416.668	18.609
Ecad MO NO	No Overlap	h4b2	11.509	634.476	94.685	2039.243	18.609
Ecad MO NO	No Overlap	h4b2	11.509	512.222	81.058	2412.027	18.609
Ecad MO NO	No Overlap	h4b2	11.509	340.23	39.769	1858.879	18.609
Ecad MO NO	No Overlap
Ecad MO NO	No Overlap	h4b3	7.024	409.615	72.236	1164.638	11.334
Ecad MO NO	No Overlap	h4b3	7.024	543.896	84.909	1708.83	11.334
Ecad MO NO	No Overlap	h4b3	7.024	624.895	100.942	1706.325	11.334
Ecad MO NO	No Overlap	h4b3	7.024	698.083	130.923	2122.196	11.334
Ecad MO NO	No Overlap	h4b3	7.024	718.447	66.607	2502.065	11.334
Ecad MO NO	No Overlap	h4b3	7.024	757.25	132.355	3286.378	11.334
Ecad MO NO	No Overlap	h4b3	7.024	763.759	121.541	3801.758	11.334
Ecad MO NO	No Overlap	h4b3	7.024	688.726	91.42	3733.401	11.334
Ecad MO NO	No Overlap	h4b3	7.024	554.598	85.383	2716.155	11.334
Ecad MO NO	No Overlap
Ecad MO NO	No Overlap	h4b4	8.267	332.501	51.079	1018.995	13.354
Ecad MO NO	No Overlap	h4b4	8.267	450.261	65.369	1195.373	13.354
Ecad MO NO	No Overlap	h4b4	8.267	510.033	75.697	1372.495	13.354
Ecad MO NO	No Overlap	h4b4	8.267	550.972	89.72	1742.653	13.354
Ecad MO NO	No Overlap	h4b4	8.267	533.183	107.138	2208.675	13.354
Ecad MO NO	No Overlap	h4b4	8.267	481.482	58.163	2321.193	13.354
Ecad MO NO	No Overlap	h4b4	8.7	776.54	33.94	2872.276	14.057
Ecad MO NO	No Overlap	h4b4	8.7	651.742	68.965	2797.767	14.057
Ecad MO NO	No Overlap	h4b4	8.7	472.877	48.714	2784.531	14.057
Ecad MO NO	No Overlap
Ecad MO NO	No Overlap	h4b5	10.861	456.774	50.989	1350.673	17.571
Ecad MO NO	No Overlap	h4b5	10.861	538.593	56.029	1685.494	17.571
Ecad MO NO	No Overlap	h4b5	10.861	674.612	147.819	2305.332	17.571
Ecad MO NO	No Overlap	h4b5	10.861	773.495	128.458	2426.552	17.571
Ecad MO NO	No Overlap	h4b5	10.861	650.65	108.767	2640.588	17.571
Ecad MO NO	No Overlap	h4b5	11.077	681.798	139.577	2332.868	17.923
Ecad MO NO	No Overlap	h4b5	11.077	760.973	102.553	2197.109	17.923
Ecad MO NO	No Overlap	h4b5	11.077	643.653	155.777	1972.966	17.923
Ecad MO NO	No Overlap
Ecad MO NO	No Overlap	h4b6	11.833	370.529	56.637	1202.237	19.153
Ecad MO NO	No Overlap	h4b6	11.833	522.962	78.692	1692.775	19.153
Ecad MO NO	No Overlap	h4b6	11.833	551.936	72.822	1908.225	19.153
Ecad MO NO	No Overlap	h4b6	11.833	559.944	60.619	2059.843	19.153
Ecad MO NO	No Overlap	h4b6	12.482	771.125	118.985	3155.048	20.207
Ecad MO NO	No Overlap	h4b6	12.482	734.767	105.359	4095	20.207
Ecad MO NO	No Overlap	h4b6	12.482	631.365	136.077	3612.992	20.207
Ecad MO NO	No Overlap	h4b6	12.482	459.006	71.856	2042.831	20.207
Ecad MO NO	No Overlap	h4b6	12.482	320.806	58.228	2220.177	20.207
Ecad MO NO	No Overlap
Ecad MO NO	No Overlap	h4b7	7.187	404.075	23.752	1777.359	11.597
Ecad MO NO	No Overlap	h4b7	7.187	448.244	16.278	1900.967	11.597
Ecad MO NO	No Overlap	h4b7	7.187	535.682	46.57	2666.513	11.597
Ecad MO NO	No Overlap	h4b7	7.187	585.848	40.457	2043.146	11.597
Ecad MO NO	No Overlap	h4b7	7.187	580.032	71.37	2056.723	11.597
Ecad MO NO	No Overlap	h4b7	7.187	556.223	126.79	2018.641	11.597
Ecad MO NO	No Overlap	h4b7	7.187	521.285	90.603	2403.01	11.597
Ecad MO NO	No Overlap	h4b7	7.187	454.86	54.782	1865.776	11.597
Ecad MO NO	No Overlap	h4b7	7.187	258.077	20.359	1289.039	11.597
Ecad MO NO	No Overlap
Ecad MO NO	No Overlap	h4b8	8.645	232.037	31.612	723.843	13.97
Ecad MO NO	No Overlap	h4b8	8.645	361.747	74.518	1095.835	13.97
Ecad MO NO	No Overlap	h4b8	8.645	376.478	64.034	1172.256	13.97
Ecad MO NO	No Overlap	h4b8	8.645	375.397	46.518	1294.491	13.97
Ecad MO NO	No Overlap	h4b8	8.645	398.565	96.874	1438.111	13.97
Ecad MO NO	No Overlap	h4b8	8.645	471.862	67.501	2017.257	13.97
Ecad MO NO	No Overlap	h4b8	8.645	529.628	77.609	2600.794	13.97
Ecad MO NO	No Overlap	h4b8	8.645	531.013	48.84	2515.062	13.97
Ecad MO NO	No Overlap	h4b8	8.645	543.21	84.723	2130.244	13.97
Ecad MO NO	No Overlap	h4b8	6.106	638.669	57.565	1919.479	9.84
Ecad MO NO	No Overlap	h4b8	6.106	604.63	102.429	2087.861	9.84
Ecad MO NO	No Overlap	h4b8	6.106	531.328	112.426	2704.324	9.84
Ecad MO NO	No Overlap	h4b8	6.106	388.506	88.421	1387.661	9.84
Ecad MO NO	No Overlap	h5b1	14.697	229.538	0.646	1769.5	23.81
Ecad MO NO	No Overlap	h5b1	14.697	258.749	3.481	2707.924	23.81
Ecad MO NO	No Overlap	h5b1	14.697	256.762	11.321	2786.41	23.81
Ecad MO NO	No Overlap	h5b1	14.697	260.501	25.384	1776.472	23.81
Ecad MO NO	No Overlap	h5b1	13.725	567.44	91.95	2979.236	22.228
Ecad MO NO	No Overlap	h5b1	13.725	495.655	58.594	2217.454	22.228
Ecad MO NO	No Overlap	h5b1	13.725	452.627	87.018	1812.072	22.228
Ecad MO NO	No Overlap	h5b1	13.725	421.229	67.108	2017.189	22.228
Ecad MO NO	No Overlap	h5b1	13.725	392.751	28.501	1448.409	22.228
Ecad MO NO	No Overlap	h5b1	13.725	335.74	52.331	1165.265	22.228
Ecad MO NO	No Overlap
Ecad MO NO	No Overlap	h5b2	10.591	265.045	3.562	816.168	17.132
Ecad MO NO	No Overlap	h5b2	10.591	311.865	31.356	763.313	17.132
Ecad MO NO	No Overlap	h5b2	10.591	351.011	74.411	843.327	17.132
Ecad MO NO	No Overlap	h5b2	10.591	372.813	46.968	932.973	17.132
Ecad MO NO	No Overlap	h5b2	10.591	387.789	43.387	1176.235	17.132
Ecad MO NO	No Overlap	h5b2	10.591	357.083	5.967	1515.236	17.132
Ecad MO NO	No Overlap	h5b2	10.591	374.936	5.524	1386.353	17.132
Ecad MO NO	No Overlap	h5b2	10.591	430.004	2.129	3044.102	17.132
Ecad MO NO	No Overlap
Ecad MO NO	No Overlap	h5b3	8.537	307.899	21.631	1023.818	13.794
Ecad MO NO	No Overlap	h5b3	8.537	365.936	44.925	1374.059	13.794
Ecad MO NO	No Overlap	h5b3	8.537	387.109	49.267	1787.48	13.794
Ecad MO NO	No Overlap	h5b3	8.537	400.213	48.034	2207.624	13.794
Ecad MO NO	No Overlap	h5b3	8.537	391.252	57.517	2181.44	13.794
Ecad MO NO	No Overlap	h5b3	8.537	454.649	20.558	2180.67	13.794
Ecad MO NO	No Overlap	h5b3	8.537	469.854	66.563	1566.398	13.794
Ecad MO NO	No Overlap	h5b3	8.537	481.951	66.16	1825.445	13.794
Ecad MO NO	No Overlap
Ecad MO NO	No Overlap	h5b4	5.782	257.891	1.85	921.839	9.313
Ecad MO NO	No Overlap	h5b4	5.782	284.831	16.984	1222.94	9.313
Ecad MO NO	No Overlap	h5b4	5.782	259.949	12.748	1325.091	9.313
Ecad MO NO	No Overlap	h5b4	5.782	246.216	29.676	1341.104	9.313
Ecad MO NO	No Overlap	h5b4	5.782	233.342	22.057	1229.7	9.313
Ecad MO NO	No Overlap	h5b4	5.782	228.191	31.951	990.533	9.313
Ecad MO NO	No Overlap	h5b4	5.836	457.23	71.955	1243.361	9.401
Ecad MO NO	No Overlap	h5b4	5.836	461.035	100.066	1434.536	9.401
Ecad MO NO	No Overlap	h5b4	5.836	379.102	52.393	1284.263	9.401
Ecad MO NO	No Overlap
Ecad MO NO	No Overlap	h5b5	7.835	270.465	28.084	800.852	12.652
Ecad MO NO	No Overlap	h5b5	7.835	285.43	32.725	993.093	12.652
Ecad MO NO	No Overlap	h5b5	7.835	258.383	13.455	954.821	12.652
Ecad MO NO	No Overlap	h5b5	7.835	224.163	16.07	838.392	12.652
Ecad MO NO	No Overlap	h5b5	7.835	205.043	14.868	726.835	12.652
Ecad MO NO	No Overlap	h6b1	8.051	313.008	9.954	1016.304	13.003
Ecad MO NO	No Overlap	h6b1	8.051	389.078	31.599	1307.616	13.003
Ecad MO NO	No Overlap	h6b1	8.051	490.627	89.931	1269.649	13.003
Ecad MO NO	No Overlap	h6b1	8.051	616.492	88.071	1542.835	13.003
Ecad MO NO	No Overlap	h6b1	8.051	732.138	196.616	2338.452	13.003
Ecad MO NO	No Overlap	h6b1	8.051	697.87	120.114	2127.782	13.003
Ecad MO NO	No Overlap	h6b1	8.051	638.086	143.368	2796.137	13.003
Ecad MO NO	No Overlap	h6b1	8.051	503.84	97.28	3250.392	13.003
Ecad MO NO	No Overlap
Ecad MO NO	No Overlap	h6b2	9.888	291.182	30.719	916.934	15.99
Ecad MO NO	No Overlap	h6b2	9.888	382.092	38.877	1399.443	15.99
Ecad MO NO	No Overlap	h6b2	9.888	450.593	58.07	2165.535	15.99
Ecad MO NO	No Overlap	h6b2	9.888	485.482	77.853	2009.08	15.99
Ecad MO NO	No Overlap	h6b2	10.212	704.554	87.671	2023.212	16.517
Ecad MO NO	No Overlap	h6b2	10.212	741.129	104.076	1881.619	16.517
Ecad MO NO	No Overlap	h6b2	10.212	757.017	140.737	2058.92	16.517
Ecad MO NO	No Overlap	h6b2	10.212	634.656	192.933	1518.514	16.517
Ecad MO NO	No Overlap
Ecad MO NO	No Overlap	h6b3	6.268	386.412	52.544	1326.702	10.104
Ecad MO NO	No Overlap	h6b3	6.268	452.634	84.64	1569.807	10.104
Ecad MO NO	No Overlap	h6b3	6.268	542.042	92.582	1997.472	10.104
Ecad MO NO	No Overlap	h6b3	6.268	613.526	74.965	1897.408	10.104
Ecad MO NO	No Overlap	h6b3	6.268	631.734	81.972	1568.681	10.104
Ecad MO NO	No Overlap	h6b3	6.268	654.767	122.156	2116.433	10.104
Ecad MO NO	No Overlap	h6b3	6.268	596.577	123.879	1848.819	10.104
Ecad MO NO	No Overlap	h6b3	6.268	452.63	48.301	1519.403	10.104
Ecad MO NO	No Overlap
Ecad MO NO	No Overlap	h6b4	11.131	278.065	19.515	997.592	18.011
Ecad MO NO	No Overlap	h6b4	11.131	356.526	34.797	1027.095	18.011
Ecad MO NO	No Overlap	h6b4	11.131	391.503	58.91	1733.354	18.011
Ecad MO NO	No Overlap	h6b4	11.131	400.154	96.032	1848.15	18.011
Ecad MO NO	No Overlap	h6b4	11.131	389.909	80.747	1248.296	18.011
Ecad MO NO	No Overlap	h6b4	11.131	392.003	58.702	1168.974	18.011
Ecad MO NO	No Overlap	h6b4	11.131	423.809	41.615	1593.232	18.011
Ecad MO NO	No Overlap	h6b4	11.131	437.711	47.316	3624.62	18.011
Ecad MO NO	No Overlap	h6b4	11.131	406.044	16.487	1495.594	18.011
Ecad MO NO	No Overlap	h6b4	11.131	352.86	3.353	1749.827	18.011
Ecad MO NO	No Overlap
Ecad MO NO	No Overlap	h6b5	9.672	359.797	22.966	875.685	15.639
Ecad MO NO	No Overlap	h6b5	9.672	395.934	18.188	1126.455	15.639
Ecad MO NO	No Overlap	h6b5	9.672	398.748	22.745	1122.786	15.639
Ecad MO NO	No Overlap	h6b5	9.672	403.227	36.962	1486.137	15.639
Ecad MO NO	No Overlap	h6b5	9.672	354.327	24.978	1437.575	15.639
Ecad MO NO	No Overlap	h6b5	9.672	320.487	9.004	1181.201	15.639
Ecad MO NO	No Overlap	h6b5	9.672	289.885	8.461	1097.147	15.639
Ecad MO NO	No Overlap
Ecad MO NO	No Overlap	h6b6	8.591	299.046	56.949	989.361	13.846
Ecad MO NO	No Overlap	h6b6	8.591	325.843	48.093	1121.532	13.846
Ecad MO NO	No Overlap	h6b6	8.591	362.993	50.503	1237.032	13.846
Ecad MO NO	No Overlap	h6b6	8.591	402.724	66.674	1415.844	13.846
Ecad MO NO	No Overlap	h6b6	8.591	410.059	30.117	1820.588	13.846
Ecad MO NO	No Overlap	h6b6	8.591	387.076	49.102	1780.995	13.846
Ecad MO NO	No Overlap	h6b6	8.591	279.92	30.569	1415.761	13.846
Ecad MO NO	No Overlap
Ecad MO NO	No Overlap	h6b7	7.835	365.526	0	930.208	12.652
Ecad MO NO	No Overlap	h6b7	7.835	460.476	0	1415.613	12.652
Ecad MO NO	No Overlap	h6b7	7.835	555.521	0	1922.099	12.652
Ecad MO NO	No Overlap	h6b7	7.835	599.219	0	1962.509	12.652
Ecad MO NO	No Overlap	h6b7	7.835	648.788	0	2744.114	12.652
Ecad MO NO	No Overlap	h6b7	7.835	677.712	0	4095	12.652
Ecad MO NO	No Overlap	h6b7	7.835	617.004	0	4095	12.652
Ecad MO NO	No Overlap	h6b7	7.835	438.717	0	3627.485	12.652
Ecad MO NO	No Overlap	h7b1	8.754	303.31	47.378	675.449	14.145
Ecad MO NO	No Overlap	h7b1	8.754	441.427	62.015	1456.952	14.145
Ecad MO NO	No Overlap	h7b1	8.754	591.138	104.695	2141.204	14.145
Ecad MO NO	No Overlap	h7b1	8.754	803.39	138.888	3067.841	14.145
Ecad MO NO	No Overlap	h7b1	8.754	699.916	135.587	2746.112	14.145
Ecad MO NO	No Overlap	h7b1	8.754	445.021	89.934	1834.497	14.145
Ecad MO NO	No Overlap
Ecad MO NO	No Overlap	h7b2	9.132	260.386	37.991	782.689	14.76
Ecad MO NO	No Overlap	h7b2	9.132	421.273	85.641	1487.899	14.76
Ecad MO NO	No Overlap	h7b2	9.132	563.921	95.865	2388.156	14.76
Ecad MO NO	No Overlap	h7b2	9.132	623.981	105.759	2457.767	14.76
Ecad MO NO	No Overlap	h7b2	9.132	500.352	100.595	1529.623	14.76
Ecad MO NO	No Overlap	h7b2	9.132	421.321	80.14	2646.385	14.76
Ecad MO NO	No Overlap	h7b2	9.132	322.08	58.748	2893.589	14.76
Ecad MO NO	No Overlap	h7b2	9.132	241.411	42.361	1709.353	14.76
Ecad MO NO	No Overlap
Ecad MO NO	No Overlap	h7b3	8.159	309.217	41.547	805.546	13.179
Ecad MO NO	No Overlap	h7b3	8.159	460.29	58.08	1658.41	13.179
Ecad MO NO	No Overlap	h7b3	8.159	548.605	66.28	2462.873	13.179
Ecad MO NO	No Overlap	h7b3	8.159	527.054	137.83	2207.896	13.179
Ecad MO NO	No Overlap	h7b3	8.159	470.679	95.129	1626.7	13.179
Ecad MO NO	No Overlap	h7b3	8.159	438.557	60.235	1719.732	13.179
Ecad MO NO	No Overlap	h7b3	8.159	352.745	57.563	1413.033	13.179
Ecad MO NO	No Overlap
Ecad MO NO	No Overlap	h7b4	6.538	491.257	110.654	2023.61	10.543
Ecad MO NO	No Overlap	h7b4	6.538	529.798	101.212	1830.733	10.543
Ecad MO NO	No Overlap	h7b4	6.538	584.549	131.04	2047.485	10.543
Ecad MO NO	No Overlap	h7b4	6.538	550.863	145.825	2298.455	10.543
Ecad MO NO	No Overlap	h7b4	6.538	413.867	72.902	1659.77	10.543
Ecad MO NO	No Overlap
Ecad MO NO	No Overlap	h7b5	6.106	379.666	86.326	1114.521	9.84
Ecad MO NO	No Overlap	h7b5	6.106	461.652	75.684	1561.973	9.84
Ecad MO NO	No Overlap	h7b5	6.106	464.634	72.144	1379.213	9.84
Ecad MO NO	No Overlap	h7b5	6.106	376.513	108.575	887.961	9.84
Ecad MO NO	No Overlap	h7b5	6.106	383.445	109.063	1540.789	9.84
Ecad MO NO	No Overlap	h7b5	6.106	354.909	71.647	1573.914	9.84
Ecad MO NO	No Overlap	h7b5	6.106	1337.146	393.547	3134.335	9.84
Ecad MO CO	Complete Overlap	h1b1	20.857	216.655	10.621	822.761	33.825
Ecad MO CO	Complete Overlap	h1b1	20.857	271.713	24.201	1204.317	33.825
Ecad MO CO	Complete Overlap	h1b1	20.857	331.862	32.268	1398.243	33.825
Ecad MO CO	Complete Overlap	h1b1	20.857	342.853	34.324	1111.516	33.825
Ecad MO CO	Complete Overlap	h1b1	20.857	267.349	26.936	1266.511	33.825
Ecad MO CO	Complete Overlap	h1b1	20.857	227.987	13.127	1377.503	33.825
Ecad MO PO	Partial Overlap	h1b1	13.076	314.029	16.168	1354.179	21.174
Ecad MO PO	Partial Overlap	h1b1	13.076	355.997	13.803	1850.244	21.174
Ecad MO PO	Partial Overlap	h1b1	13.076	345.425	29.051	1493.312	21.174
Ecad MO PO	Partial Overlap	h1b1	13.076	291.725	19.361	1599.913	21.174
Ecad MO PO	Partial Overlap	h1b1	13.076	270.083	5.02	2635.768	21.174
Ecad MO PO	Partial Overlap
Ecad MO PO	Partial Overlap	h1b2	14.535	266.669	36.63	932.442	23.546
Ecad MO PO	Partial Overlap	h1b2	14.535	302.901	34.633	992.51	23.546
Ecad MO PO	Partial Overlap	h1b2	14.535	343.698	40.003	1841.574	23.546
Ecad MO PO	Partial Overlap	h1b2	14.535	317.985	32.581	1581.914	23.546
Ecad MO PO	Partial Overlap	h1b2	14.535	287.747	13.926	1289.805	23.546
Ecad MO PO
Ecad MO PO
Ecad MO PO
Ecad MO NO	No Overlap	h1b1	13.022	382.661	9.153	1306.669	21.048
Ecad MO NO	No Overlap	h1b1	13.022	482.2	31.368	2269.312	21.048
Ecad MO NO	No Overlap	h1b1	13.022	528.838	22.472	2394.466	21.048
Ecad MO NO	No Overlap	h1b1	13.022	493.086	79.607	1826.279	21.048
Ecad MO NO	No Overlap	h1b1	13.022	438.489	57.783	1764.336	21.048
Ecad MO NO	No Overlap	h1b1	13.022	350.917	42.321	1283.05	21.048
Ecad MO NO	No Overlap
Ecad MO NO	No Overlap	h1b2	10.104	238.741	37.71	671.759	16.342
Ecad MO NO	No Overlap	h1b2	10.104	275.517	24.803	913.686	16.342
Ecad MO NO	No Overlap	h1b2	10.104	303.602	40.032	960.928	16.342
Ecad MO NO	No Overlap	h1b2	10.104	293.155	43.23	1310.831	16.342
Ecad MO NO	No Overlap	h1b2	10.104	271.398	34.903	1635.563	16.342
Ecad MO NO	No Overlap	h1b2	10.375	285.674	25.286	2101.656	16.781
Ecad MO NO	No Overlap	h1b2	10.375	268.244	13.872	1604.907	16.781
Ecad MO NO	No Overlap
Ecad MO NO	No Overlap	h1b3	11.617	145.025	0	526.063	18.802
Ecad MO NO	No Overlap	h1b3	11.617	225.711	0.679	764.081	18.802
Ecad MO NO	No Overlap	h1b3	11.509	334.098	16.266	1109	18.626
Ecad MO NO	No Overlap	h1b3	11.509	418.978	14.694	1534.105	18.626
Ecad MO NO	No Overlap	h1b3	11.509	405.317	21.283	1320.096	18.626
Ecad MO NO	No Overlap	h1b3	11.996	464.041	89.127	1767.122	19.417
Ecad MO NO	No Overlap	h1b3	11.996	416.326	38.909	1851.789	19.417
