# Supplementary material for: Stepwise polarisation of developing bilayered epidermis is mediated by aPKC and E-cadherin in zebrafish
Source: eLife. 2020 Jan 22;9:e49064. doi: 10.7554/eLife.49064 (PMC6975926; doi:10.7554/eLife.49064)
Supplement: Figure 4—figure supplement 2—source data 8. [file elife-49064-fig4-figsupp2-data8.csv]

Genotype	Boundary	Cell name	Area	Mean	Min	Max	Length
Ctrl MO C-C	Clone-Clone	h2b1	7.349	542.342	77.555	2569.128	11.861
Ctrl MO C-C	Clone-Clone	h2b1	7.349	444.068	52.923	3818.389	11.861
Ctrl MO C-C	Clone-Clone	h2b1	7.349	329.1	58.074	4045.144	11.861
Ctrl MO C-C	Clone-Clone	h2b1	7.349	228.095	36.124	1866.556	11.861
Ctrl MO C-C	Clone-Clone	h2b1	7.349	139.782	15.737	685.532	11.861
Ctrl MO C-C	Clone-Clone	h2b10	9.024	436.241	75.82	2252.624	14.584
Ctrl MO C-C	Clone-Clone	h2b10	9.024	404.756	25.279	1938.057	14.584
Ctrl MO C-C	Clone-Clone	h2b10	9.024	364.146	29.925	1268.715	14.584
Ctrl MO C-C	Clone-Clone	h2b10	9.024	307.847	32.139	1387.145	14.584
Ctrl MO C-C	Clone-Clone	h2b10	11.239	304.425	12.398	1445.942	18.187
Ctrl MO C-C	Clone-Clone	h2b10	11.239	268.511	13.779	1594.605	18.187
Ctrl MO C-C	Clone-Clone	h2b10	11.239	233.968	2.615	1752.789	18.187
Ctrl MO C-C	Clone-Clone	h2b10	11.239	194.577	9.114	1415.634	18.187
Ctrl MO C-C	Clone-Clone	h2b11	5.187	663.548	116.241	2202.112	8.344
Ctrl MO C-C	Clone-Clone	h2b11	5.187	687.22	171.276	1909.377	8.344
Ctrl MO C-C	Clone-Clone	h2b11	5.187	680.986	206.52	3010.528	8.344
Ctrl MO C-C	Clone-Clone	h2b11	5.187	436.994	67.33	1164.605	8.344
Ctrl MO C-C	Clone-Clone	h2b11	5.187	262.227	16.158	762.813	8.344
Ctrl MO C-C	Clone-Clone	h2b11	5.187	188.581	18.578	691.278	8.344
Ctrl MO C-C	Clone-Clone	h2b12	6.268	605.321	99.269	1885.139	10.104
Ctrl MO C-C	Clone-Clone	h2b12	6.268	557.277	149.285	1357.953	10.104
Ctrl MO C-C	Clone-Clone	h2b12	6.268	474.009	116.116	1564.956	10.104
Ctrl MO C-C	Clone-Clone	h2b12	6.268	395.449	112.837	2293.057	10.104
Ctrl MO C-C	Clone-Clone	h2b12	6.268	308.096	29.057	1351.974	10.104
Ctrl MO C-C	Clone-Clone	h2b13	7.024	709.451	154.015	3747.782	11.334
Ctrl MO C-C	Clone-Clone	h2b13	7.024	399.707	56.847	1693.263	11.334
Ctrl MO C-C	Clone-Clone	h2b13	7.024	228.66	6.132	983.738	11.334
Ctrl MO C-C	Clone-Clone	h2b13	7.024	164.863	2.917	725.802	11.334
Ctrl MO C-C	Clone-Clone	h2b13	7.024	122.669	12.653	589.214	11.334
Ctrl MO C-C	Clone-Clone	h2b13	7.024	87.913	1.08	620.581	11.334
Ctrl MO C-C	Clone-Clone	h2b14	9.132	505.525	135.432	1730.802	14.76
Ctrl MO C-C	Clone-Clone	h2b14	9.132	488.527	143.784	1835.284	14.76
Ctrl MO C-C	Clone-Clone	h2b14	9.132	413.028	100.417	1220.701	14.76
Ctrl MO C-C	Clone-Clone	h2b14	9.132	307.797	74.32	1473.686	14.76
Ctrl MO C-C	Clone-Clone	h2b14	9.132	281.343	43.593	1702.385	14.76
Ctrl MO C-C	Clone-Clone	h2b15	11.239	620.152	104.767	4006.651	18.186
Ctrl MO C-C	Clone-Clone	h2b15	11.239	457.986	74.331	1803.136	18.186
Ctrl MO C-C	Clone-Clone	h2b15	11.239	351.527	80.893	1167.893	18.186
Ctrl MO C-C	Clone-Clone	h2b15	11.239	280.999	39.524	1126.323	18.186
Ctrl MO C-C	Clone-Clone	h2b15	11.239	228.894	19.505	1114.132	18.186
Ctrl MO C-C	Clone-Clone	h2b15	11.239	206.484	3.752	4054.558	18.186
Ctrl MO C-C	Clone-Clone	h2b15	11.239	191.734	4.128	4095	18.186
Ctrl MO C-C	Clone-Clone	h2b2	2.81	625.946	133.912	2169.604	4.481
Ctrl MO C-C	Clone-Clone	h2b2	2.81	683.81	222.039	2473.489	4.481
Ctrl MO C-C	Clone-Clone	h2b2	2.81	606.284	47.119	2580.677	4.481
Ctrl MO C-C	Clone-Clone	h2b2	2.81	458.737	54.708	1578.756	4.481
Ctrl MO C-C	Clone-Clone	h2b3	14.103	597.375	102.76	4095	22.843
Ctrl MO C-C	Clone-Clone	h2b3	14.103	510.903	66.31	3425.685	22.843
Ctrl MO C-C	Clone-Clone	h2b3	13.076	461.826	57.131	2656.521	21.174
Ctrl MO C-C	Clone-Clone	h2b3	13.076	305.437	18.662	1705.604	21.174
Ctrl MO C-C	Clone-Clone	h2b3	13.076	132.473	5.181	502.491	21.174
Ctrl MO C-C	Clone-Clone	h2b4	5.133	660.644	211.05	3602.23	8.258
Ctrl MO C-C	Clone-Clone	h2b4	5.133	665.207	114.117	3162.698	8.258
Ctrl MO C-C	Clone-Clone	h2b4	5.133	593.579	119.849	3009.83	8.258
Ctrl MO C-C	Clone-Clone	h2b4	5.133	437.72	80.311	1765.569	8.258
Ctrl MO C-C	Clone-Clone	h2b5	8.213	551.433	120.642	1906.747	13.267
Ctrl MO C-C	Clone-Clone	h2b5	8.213	468.399	98.186	2532.489	13.267
Ctrl MO C-C	Clone-Clone	h2b5	8.213	376.623	74.547	2330.912	13.267
Ctrl MO C-C	Clone-Clone	h2b5	8.213	265.736	43.84	2243.548	13.267
Ctrl MO C-C	Clone-Clone	h2b5	8.213	166.582	20.978	656.811	13.267
Ctrl MO C-C	Clone-Clone	h2b6	6.322	563.011	94.135	3487.302	10.192
Ctrl MO C-C	Clone-Clone	h2b6	6.322	504.737	27.758	2354.194	10.192
Ctrl MO C-C	Clone-Clone	h2b6	6.322	419.069	52.163	1317.64	10.192
Ctrl MO C-C	Clone-Clone	h2b6	6.322	321.509	35.471	2230.33	10.192
Ctrl MO C-C	Clone-Clone	h2b6	6.322	210.71	22.824	1187.907	10.192
Ctrl MO C-C	Clone-Clone	h2b7	7.295	699.452	113.79	2295.552	11.773
Ctrl MO C-C	Clone-Clone	h2b7	7.295	626.806	144.972	2282.828	11.773
Ctrl MO C-C	Clone-Clone	h2b7	7.295	558.834	118.274	2261.361	11.773
Ctrl MO C-C	Clone-Clone	h2b7	7.295	478.336	83.114	1677.939	11.773
Ctrl MO C-C	Clone-Clone	h2b7	7.295	381.825	28.452	2279.96	11.773
Ctrl MO C-C	Clone-Clone	h2b7	7.295	311.228	24.073	1710.752	11.773
Ctrl MO C-C	Clone-Clone	h2b8	8.808	778.838	164.884	4090.397	14.233
Ctrl MO C-C	Clone-Clone	h2b8	8.808	677.952	127.68	4075.605	14.233
Ctrl MO C-C	Clone-Clone	h2b8	8.808	606.722	89.104	2543.011	14.233
Ctrl MO C-C	Clone-Clone	h2b8	8.808	546.338	70.987	1868.936	14.233
Ctrl MO C-C	Clone-Clone	h2b9	2.918	542.966	117.473	3664.83	4.657
Ctrl MO C-C	Clone-Clone	h2b9	2.918	455.384	78.728	1971.146	4.657
Ctrl MO C-C	Clone-Clone	h2b9	2.918	247.553	89.113	568.594	4.657
Ctrl MO C-C	Clone-Clone	h3b1	7.673	48.679	0	214.829	12.388
Ctrl MO C-C	Clone-Clone	h3b1	7.673	105.391	1.037	494.369	12.388
Ctrl MO C-C	Clone-Clone	h3b1	7.673	158.697	4.056	637.091	12.388
Ctrl MO C-C	Clone-Clone	h3b1	8.537	315.695	17.982	1216.147	13.794
Ctrl MO C-C	Clone-Clone	h3b1	8.537	311.58	34.57	998.907	13.794
Ctrl MO C-C	Clone-Clone	h3b1	8.537	272.273	31.275	1023.115	13.794
Ctrl MO C-C	Clone-Clone	h3b2	5.187	414.152	52.169	1135.422	8.346
Ctrl MO C-C	Clone-Clone	h3b2	5.187	256.298	28.228	832.678	8.346
Ctrl MO C-C	Clone-Clone	h3b2	5.187	133.582	9.197	491.995	8.346
Ctrl MO C-C	Clone-Clone	h3b2	5.187	81.171	6.155	303.174	8.346
Ctrl MO C-C	Clone-Clone	h3b2	5.187	42.742	0	188.693	8.346
Ctrl MO C-C	Clone-Clone	h3b3	8.051	300.019	19.422	866.891	13.001
Ctrl MO C-C	Clone-Clone	h3b3	8.051	346.708	40.621	1154.239	13.001
Ctrl MO C-C	Clone-Clone	h3b3	8.051	298.128	9.071	930.297	13.001
Ctrl MO C-C	Clone-Clone	h3b3	8.051	227.791	6.242	820.821	13.001
Ctrl MO C-C	Clone-Clone	h3b3	8.051	123.579	12.893	339.289	13.001
Ctrl MO C-C	Clone-Clone	h3b4	5.241	334.643	53.834	898.338	8.434
Ctrl MO C-C	Clone-Clone	h3b4	5.241	330.187	21.599	1026.286	8.434
Ctrl MO C-C	Clone-Clone	h3b4	5.241	222.909	22.788	901.654	8.434
Ctrl MO C-C	Clone-Clone	h3b4	5.241	150.381	20.076	541.342	8.434
Ctrl MO C-C	Clone-Clone	h3b4	5.241	85.668	3.295	481.074	8.434
Ctrl MO C-C	Clone-Clone	h3b5	7.997	275.176	28.589	944.968	12.915
Ctrl MO C-C	Clone-Clone	h3b5	7.997	241.24	8.289	824.098	12.915
Ctrl MO C-C	Clone-Clone	h3b5	7.997	177.899	20.238	708.333	12.915
Ctrl MO C-C	Clone-Clone	h3b5	7.997	94.302	5.886	441.586	12.915
Ctrl MO C-C	Clone-Clone	h3b5	7.997	44.074	0.019	233.322	12.915
Ctrl MO C-C	Clone-Clone	h4b1	11.077	519.244	58.484	2342.177	17.923
Ctrl MO C-C	Clone-Clone	h4b1	11.077	430.801	34.835	2092.231	17.923
Ctrl MO C-C	Clone-Clone	h4b1	11.077	337.251	28.494	3732.361	17.923
Ctrl MO C-C	Clone-Clone	h4b1	11.077	199.759	2.168	4001.96	17.923
Ctrl MO C-C	Clone-Clone	h4b1	11.077	88.012	0.169	1408.267	17.923
Ctrl MO C-C	Clone-Clone	h4b2	8.808	480.875	70.035	2456.642	14.233
Ctrl MO C-C	Clone-Clone	h4b2	8.808	434.742	39.643	2104.527	14.233
Ctrl MO C-C	Clone-Clone	h4b2	8.808	330.146	26.358	1311.56	14.233
Ctrl MO C-C	Clone-Clone	h4b2	10.537	246.649	31.32	1171.616	17.045
Ctrl MO C-C	Clone-Clone	h4b2	10.537	109.587	7.187	560.336	17.045
Ctrl MO C-C	Clone-Clone	h4b2	10.537	56.786	3.026	196.374	17.045
Ctrl MO C-C	Clone-Clone	h5b1	14.535	599.919	92.7	3956.523	23.546
Ctrl MO C-C	Clone-Clone	h5b1	14.535	432.199	69.444	2970.761	23.546
Ctrl MO C-C	Clone-Clone	h5b1	14.535	328.057	32.849	2097.948	23.546
Ctrl MO C-C	Clone-Clone	h5b1	14.535	278.008	40.493	3249.173	23.546
Ctrl MO C-C	Clone-Clone	h5b1	14.535	232.302	22.203	3083.708	23.546
Ctrl MO C-C	Clone-Clone	h5b10	11.833	547.278	92.488	2640.447	19.153
Ctrl MO C-C	Clone-Clone	h5b10	11.833	543.923	48.464	3034.512	19.153
Ctrl MO C-C	Clone-Clone	h5b10	11.833	454.141	78.259	2773.165	19.153
Ctrl MO C-C	Clone-Clone	h5b10	11.833	307.264	17.612	3632.564	19.153
Ctrl MO C-C	Clone-Clone	h5b10	11.833	169.834	10.699	1215.507	19.153
Ctrl MO C-C	Clone-Clone	h5b11	5.89	555.556	65.32	1982.773	9.489
Ctrl MO C-C	Clone-Clone	h5b11	5.89	420.793	70.83	1549.762	9.489
Ctrl MO C-C	Clone-Clone	h5b11	5.89	215.377	38.707	1017.905	9.489
Ctrl MO C-C	Clone-Clone	h5b11	5.89	117.03	7.063	790.527	9.489
Ctrl MO C-C	Clone-Clone	h5b11	5.89	108.341	8.642	1171.176	9.489
Ctrl MO C-C	Clone-Clone	h5b12	9.132	802.514	23.211	4095	14.76
Ctrl MO C-C	Clone-Clone	h5b12	9.132	649.677	7.503	4091.935	14.76
Ctrl MO C-C	Clone-Clone	h5b12	9.132	410.458	30.782	1190.601	14.76
Ctrl MO C-C	Clone-Clone	h5b12	9.132	238.552	33.013	892.572	14.76
Ctrl MO C-C	Clone-Clone	h5b12	9.132	151.832	3.637	2697.314	14.76
Ctrl MO C-C	Clone-Clone	h5b13	9.348	629.119	74.062	4095	15.112
Ctrl MO C-C	Clone-Clone	h5b13	9.348	582.317	85.501	4095	15.112
Ctrl MO C-C	Clone-Clone	h5b13	9.348	503.669	105.645	3935.077	15.112
Ctrl MO C-C	Clone-Clone	h5b13	9.348	385.985	58.272	1740.619	15.112
Ctrl MO C-C	Clone-Clone	h5b13	9.348	241.039	34.224	1355.536	15.112
Ctrl MO C-C	Clone-Clone	h5b14	6.16	530.296	63.608	2588.05	9.927
Ctrl MO C-C	Clone-Clone	h5b14	6.16	512.775	69.067	2788.323	9.927
Ctrl MO C-C	Clone-Clone	h5b14	6.16	446.673	79.018	2801.305	9.927
Ctrl MO C-C	Clone-Clone	h5b14	6.16	331.801	61.915	1165.14	9.927
Ctrl MO C-C	Clone-Clone	h5b14	6.16	205.966	13.61	591.129	9.927
Ctrl MO C-C	Clone-Clone	h5b15	10.699	551.982	107.455	3420.688	17.308
Ctrl MO C-C	Clone-Clone	h5b15	10.699	493.9	71.096	2015.742	17.308
Ctrl MO C-C	Clone-Clone	h5b15	10.699	364.435	24.761	1398.242	17.308
Ctrl MO C-C	Clone-Clone	h5b15	10.699	200.629	4.711	811.159	17.308
Ctrl MO C-C	Clone-Clone	h5b15	10.699	151.437	7.51	1827.439	17.308
Ctrl MO C-C	Clone-Clone	h5b2	18.642	679.853	144.481	2804.764	30.223
Ctrl MO C-C	Clone-Clone	h5b2	18.642	607.411	68.868	2449.446	30.223
Ctrl MO C-C	Clone-Clone	h5b2	18.642	465.568	67.825	2014.861	30.223
Ctrl MO C-C	Clone-Clone	h5b2	18.642	297.041	26.909	1293.085	30.223
Ctrl MO C-C	Clone-Clone	h5b2	18.642	180.579	13.38	826.067	30.223
Ctrl MO C-C	Clone-Clone	h5b3	9.078	532.862	82.615	2269.711	14.672
Ctrl MO C-C	Clone-Clone	h5b3	9.078	413.692	72.095	2274.87	14.672
Ctrl MO C-C	Clone-Clone	h5b3	9.078	315.963	44.133	3983.357	14.672
Ctrl MO C-C	Clone-Clone	h5b3	9.078	238.226	32.94	4095	14.672
Ctrl MO C-C	Clone-Clone	h5b3	9.078	163.363	9.082	975.162	14.672
Ctrl MO C-C	Clone-Clone	h5b4	10.321	624.593	96.891	3038.483	16.693
Ctrl MO C-C	Clone-Clone	h5b4	10.321	603.943	67.473	3361.028	16.693
Ctrl MO C-C	Clone-Clone	h5b4	10.321	458.725	73.244	1835.515	16.693
Ctrl MO C-C	Clone-Clone	h5b4	10.321	258.576	52.327	1082.965	16.693
Ctrl MO C-C	Clone-Clone	h5b4	10.321	139.535	12.438	859.924	16.693
Ctrl MO C-C	Clone-Clone	h5b5	13.292	527.926	71.318	3734.885	21.525
Ctrl MO C-C	Clone-Clone	h5b5	13.292	409.139	43.735	1908.497	21.525
Ctrl MO C-C	Clone-Clone	h5b5	13.292	336.419	36.243	2205.931	21.525
Ctrl MO C-C	Clone-Clone	h5b5	13.292	243.967	7.503	1550.812	21.525
Ctrl MO C-C	Clone-Clone	h5b5	13.292	184.816	5.999	2315.226	21.525
Ctrl MO C-C	Clone-Clone	h5b6	8.213	340.79	31.415	2574.958	13.267
Ctrl MO C-C	Clone-Clone	h5b6	8.213	303.851	27.394	1837.8	13.267
Ctrl MO C-C	Clone-Clone	h5b6	8.213	248.728	35.675	3310.157	13.267
Ctrl MO C-C	Clone-Clone	h5b6	8.213	226.998	15.572	4095	13.267
Ctrl MO C-C	Clone-Clone	h5b7	7.889	594.069	117.428	2497.901	12.729
Ctrl MO C-C	Clone-Clone	h5b7	7.889	478.402	59.106	3719.322	12.729
Ctrl MO C-C	Clone-Clone	h5b7	7.889	323.779	21.471	3169.276	12.729
Ctrl MO C-C	Clone-Clone	h5b7	7.889	150.277	3.957	648.997	12.729
Ctrl MO C-C	Clone-Clone	h5b8	8.213	670.469	105.514	4081.402	13.267
Ctrl MO C-C	Clone-Clone	h5b8	8.213	555.657	48.035	3527.848	13.267
Ctrl MO C-C	Clone-Clone	h5b8	8.213	375.576	61.942	1616.456	13.267
Ctrl MO C-C	Clone-Clone	h5b8	8.213	216.611	15.066	914.601	13.267
Ctrl MO C-C	Clone-Clone	h5b9	9.942	667.055	150.328	1951.578	16.078
Ctrl MO C-C	Clone-Clone	h5b9	9.942	592.106	86.242	2513.353	16.078
Ctrl MO C-C	Clone-Clone	h5b9	9.942	500.038	72.516	2887.359	16.078
Ctrl MO C-C	Clone-Clone	h5b9	9.942	350.208	34.729	2134.463	16.078
Ctrl MO C-C	Clone-Clone	h5b9	9.942	160.61	10.359	684.338	16.078
Ctrl MO C-C	Clone-Clone	h6b1	6.592	543.542	40.437	2090.078	10.631
Ctrl MO C-C	Clone-Clone	h6b1	6.592	340.062	32.98	1624.214	10.631
Ctrl MO C-C	Clone-Clone	h6b1	6.592	155.527	8.871	693.027	10.631
Ctrl MO C-C	Clone-Clone	h6b1	6.592	120.273	10.86	1496.522	10.631
Ctrl MO C-C	Clone-Clone	h6b1	6.592	93.407	2.14	1987.18	10.631
Ctrl MO C-C	Clone-Clone	h6b1	6.592	61.635	0.143	664.863	10.631
Ctrl MO C-C	Clone-Clone	h6b10	14.265	619.843	67.063	3724.083	23.107
Ctrl MO C-C	Clone-Clone	h6b10	14.265	490.686	55.561	3512.484	23.107
Ctrl MO C-C	Clone-Clone	h6b10	14.265	341.874	30.482	1574.646	23.107
Ctrl MO C-C	Clone-Clone	h6b10	14.265	191.432	15.495	932.543	23.107
Ctrl MO C-C	Clone-Clone	h6b10	14.265	108.081	3.202	1362.895	23.107
Ctrl MO C-C	Clone-Clone	h6b11	6.052	479.856	47.221	3493.542	9.752
Ctrl MO C-C	Clone-Clone	h6b11	6.052	514.547	32.83	3659.26	9.752
Ctrl MO C-C	Clone-Clone	h6b11	6.052	355.937	45.145	3341.825	9.752
Ctrl MO C-C	Clone-Clone	h6b11	6.052	209.888	25.22	1476.416	9.752
Ctrl MO C-C	Clone-Clone	h6b11	6.052	158.66	5.442	1435.214	9.752
Ctrl MO C-C	Clone-Clone	h6b12	12.644	470.267	37.841	1908.329	20.467
Ctrl MO C-C	Clone-Clone	h6b12	12.644	292.703	24.181	1985.326	20.467
Ctrl MO C-C	Clone-Clone	h6b12	12.644	212.465	25.985	1496.142	20.467
Ctrl MO C-C	Clone-Clone	h6b12	12.644	143.303	11.147	820.854	20.467
Ctrl MO C-C	Clone-Clone	h6b12	12.644	149.267	9.24	1449.174	20.467
Ctrl MO C-C	Clone-Clone	h6b12	12.644	175.762	9.391	1306.966	20.467
Ctrl MO C-C	Clone-Clone	h6b12	12.644	146.336	2.899	1202.464	20.467
Ctrl MO C-C	Clone-Clone	h6b13	9.996	592.586	21.5	4095	16.166
Ctrl MO C-C	Clone-Clone	h6b13	9.996	582.996	48	4095	16.166
Ctrl MO C-C	Clone-Clone	h6b13	9.996	506.963	67.401	4095	16.166
Ctrl MO C-C	Clone-Clone	h6b13	9.996	370.525	42.982	2666.454	16.166
Ctrl MO C-C	Clone-Clone	h6b13	9.996	299.087	16.034	3793.839	16.166
Ctrl MO C-C	Clone-Clone	h6b13	9.996	300.613	16.612	4095	16.166
Ctrl MO C-C	Clone-Clone	h6b14	7.241	392.237	75.438	3981.474	11.685
Ctrl MO C-C	Clone-Clone	h6b14	7.241	391.251	68.149	3664.384	11.685
Ctrl MO C-C	Clone-Clone	h6b14	7.241	376.766	27.185	3407.592	11.685
Ctrl MO C-C	Clone-Clone	h6b14	7.241	327.468	12.32	2563.073	11.685
Ctrl MO C-C	Clone-Clone	h6b14	7.241	199.029	7.033	1439.289	11.685
Ctrl MO C-C	Clone-Clone	h6b14	7.241	151.153	8.502	739.309	11.685
Ctrl MO C-C	Clone-Clone	h6b15	8.321	433.863	40.047	1983.146	13.438
Ctrl MO C-C	Clone-Clone	h6b15	8.321	405.191	22.367	1528.479	13.438
Ctrl MO C-C	Clone-Clone	h6b15	8.321	370.303	33.976	2650.806	13.438
Ctrl MO C-C	Clone-Clone	h6b15	8.321	364.455	13.406	3978.404	13.438
Ctrl MO C-C	Clone-Clone	h6b15	8.321	276.676	18.506	1972.471	13.438
Ctrl MO C-C	Clone-Clone	h6b15	8.321	219.102	15.953	1599.13	13.438
Ctrl MO C-C	Clone-Clone	h6b15	8.321	168.201	8.477	785.604	13.438
Ctrl MO C-C	Clone-Clone	h6b16	9.24	520.038	50.4	3855.926	14.89
Ctrl MO C-C	Clone-Clone	h6b16	9.24	492.316	23.066	4095	14.89
Ctrl MO C-C	Clone-Clone	h6b16	9.24	392.346	19.551	4047.268	14.89
Ctrl MO C-C	Clone-Clone	h6b16	9.24	193.016	28.158	1102.296	14.89
Ctrl MO C-C	Clone-Clone	h6b16	9.24	136.579	1.757	553.205	14.89
Ctrl MO C-C	Clone-Clone	h6b16	9.24	117.932	2.502	999.99	14.89
Ctrl MO C-C	Clone-Clone	h6b2	9.618	623.272	94.483	4091.552	15.551
Ctrl MO C-C	Clone-Clone	h6b2	9.618	388.479	37.884	1801.502	15.551
Ctrl MO C-C	Clone-Clone	h6b2	9.618	262.341	32.176	1577.358	15.551
Ctrl MO C-C	Clone-Clone	h6b2	9.618	139.382	11.138	635.423	15.551
Ctrl MO C-C	Clone-Clone	h6b3	6.592	571.719	95.829	4090.5	10.631
Ctrl MO C-C	Clone-Clone	h6b3	6.592	464.406	43.767	1921.2	10.631
Ctrl MO C-C	Clone-Clone	h6b3	6.592	332.68	44.939	1220.735	10.631
Ctrl MO C-C	Clone-Clone	h6b3	6.592	169.873	23.037	474.903	10.631
Ctrl MO C-C	Clone-Clone	h6b3	6.592	92.872	10.453	401.221	10.631
Ctrl MO C-C	Clone-Clone	h6b4	9.888	499.071	64.823	2966.724	15.988
Ctrl MO C-C	Clone-Clone	h6b4	9.888	419.4	40.304	2748.726	15.988
Ctrl MO C-C	Clone-Clone	h6b4	9.888	321.005	26.397	1699.251	15.988
Ctrl MO C-C	Clone-Clone	h6b4	9.888	183.238	15.764	873.47	15.988
Ctrl MO C-C	Clone-Clone	h6b4	9.888	112.946	6.14	1619.553	15.988
Ctrl MO C-C	Clone-Clone	h6b5	10.375	513.596	39.476	4086.312	16.781
Ctrl MO C-C	Clone-Clone	h6b5	10.375	435.711	42.378	4095	16.781
Ctrl MO C-C	Clone-Clone	h6b5	10.375	240.241	16.932	1427.693	16.781
Ctrl MO C-C	Clone-Clone	h6b5	10.375	170.478	6.438	1121.449	16.781
Ctrl MO C-C	Clone-Clone	h6b5	10.375	108.148	2.895	1306.306	16.781
Ctrl MO C-C	Clone-Clone	h6b6	8.862	509.267	129.652	1661.419	14.321
Ctrl MO C-C	Clone-Clone	h6b6	8.862	354.023	34.172	1075.144	14.321
Ctrl MO C-C	Clone-Clone	h6b6	8.862	218.836	24.367	1178.314	14.321
Ctrl MO C-C	Clone-Clone	h6b6	8.862	184.938	3.742	1002.188	14.321
Ctrl MO C-C	Clone-Clone	h6b7	14.049	562.074	62.796	3105.934	22.755
Ctrl MO C-C	Clone-Clone	h6b7	14.049	453.977	49.7	1939.283	22.755
Ctrl MO C-C	Clone-Clone	h6b7	14.049	350.068	29.892	4095	22.755
Ctrl MO C-C	Clone-Clone	h6b7	14.049	354.066	13.361	4095	22.755
Ctrl MO C-C	Clone-Clone	h6b7	14.049	314.382	16.137	4095	22.755
Ctrl MO C-C	Clone-Clone	h6b8	10.537	595.362	85.364	3880.905	17.041
Ctrl MO C-C	Clone-Clone	h6b8	10.537	372.145	37.271	1579.401	17.041
Ctrl MO C-C	Clone-Clone	h6b8	10.537	192.005	5.572	2548.271	17.041
Ctrl MO C-C	Clone-Clone	h6b8	10.537	158.811	9.701	3131.919	17.041
Ctrl MO C-C	Clone-Clone	h6b9	13.076	596.181	86.114	3247.47	21.174
Ctrl MO C-C	Clone-Clone	h6b9	13.076	540.122	61.431	2620.353	21.174
Ctrl MO C-C	Clone-Clone	h6b9	13.076	378.133	36.036	3340.557	21.174
Ctrl MO C-C	Clone-Clone	h6b9	13.076	223.243	4.736	4095	21.174
Ctrl MO C-C	Clone-Clone	h6b9	13.076	183.024	3.404	4095	21.174
Ctrl MO C-C	Clone-Clone	h7b1	8.97	681.766	73.704	4089.916	14.497
Ctrl MO C-C	Clone-Clone	h7b1	8.97	563.309	55.896	3573.522	14.497
Ctrl MO C-C	Clone-Clone	h7b1	8.97	351.984	24.017	1718.865	14.497
Ctrl MO C-C	Clone-Clone	h7b1	8.97	197.846	23.25	872.442	14.497
Ctrl MO C-C	Clone-Clone	h7b1	8.97	129.659	5.299	607.682	14.497
Ctrl MO C-C	Clone-Clone	h6b11	6.052	479.856	47.221	3493.542	9.752
Ctrl MO C-C	Clone-Clone	h6b11	6.052	514.547	32.83	3659.26	9.752
Ctrl MO C-C	Clone-Clone	h6b11	6.052	355.937	45.145	3341.825	9.752
Ctrl MO C-C	Clone-Clone	h6b11	6.052	209.888	25.22	1476.416	9.752
Ctrl MO C-C	Clone-Clone	h6b11	6.052	158.66	5.442	1435.214	9.752
Ctrl MO C-C	Clone-Clone
Ctrl MO C-C	Clone-Clone	h6b12	12.644	470.267	37.841	1908.329	20.467
Ctrl MO C-C	Clone-Clone	h6b12	12.644	292.703	24.181	1985.326	20.467
Ctrl MO C-C	Clone-Clone	h6b12	12.644	212.465	25.985	1496.142	20.467
Ctrl MO C-C	Clone-Clone	h6b12	12.644	143.303	11.147	820.854	20.467
Ctrl MO C-C	Clone-Clone	h6b12	12.644	149.267	9.24	1449.174	20.467
Ctrl MO C-C	Clone-Clone	h6b12	12.644	175.762	9.391	1306.966	20.467
Ctrl MO C-C	Clone-Clone	h6b12	12.644	146.336	2.899	1202.464	20.467
Ctrl MO C-C	Clone-Clone
Ctrl MO C-C	Clone-Clone	h6b13	9.996	592.586	21.5	4095	16.166
Ctrl MO C-C	Clone-Clone	h6b13	9.996	582.996	48	4095	16.166
Ctrl MO C-C	Clone-Clone	h6b13	9.996	506.963	67.401	4095	16.166
Ctrl MO C-C	Clone-Clone	h6b13	9.996	370.525	42.982	2666.454	16.166
Ctrl MO C-C	Clone-Clone	h6b13	9.996	299.087	16.034	3793.839	16.166
Ctrl MO C-C	Clone-Clone	h6b13	9.996	300.613	16.612	4095	16.166
Ctrl MO C-C	Clone-Clone
Ctrl MO C-C	Clone-Clone	h6b14	7.241	392.237	75.438	3981.474	11.685
Ctrl MO C-C	Clone-Clone	h6b14	7.241	391.251	68.149	3664.384	11.685
Ctrl MO C-C	Clone-Clone	h6b14	7.241	376.766	27.185	3407.592	11.685
Ctrl MO C-C	Clone-Clone	h6b14	7.241	327.468	12.32	2563.073	11.685
Ctrl MO C-C	Clone-Clone	h6b14	7.241	199.029	7.033	1439.289	11.685
Ctrl MO C-C	Clone-Clone	h6b14	7.241	151.153	8.502	739.309	11.685
Ctrl MO C-C	Clone-Clone
Ctrl MO C-C	Clone-Clone	h6b15	8.321	433.863	40.047	1983.146	13.438
Ctrl MO C-C	Clone-Clone	h6b15	8.321	405.191	22.367	1528.479	13.438
Ctrl MO C-C	Clone-Clone	h6b15	8.321	370.303	33.976	2650.806	13.438
Ctrl MO C-C	Clone-Clone	h6b15	8.321	364.455	13.406	3978.404	13.438
Ctrl MO C-C	Clone-Clone	h6b15	8.321	276.676	18.506	1972.471	13.438
Ctrl MO C-C	Clone-Clone	h6b15	8.321	219.102	15.953	1599.13	13.438
Ctrl MO C-C	Clone-Clone	h6b15	8.321	168.201	8.477	785.604	13.438
Ctrl MO C-C	Clone-Clone
Ctrl MO C-C	Clone-Clone	h6b16	9.24	520.038	50.4	3855.926	14.89
Ctrl MO C-C	Clone-Clone	h6b16	9.24	492.316	23.066	4095	14.89
Ctrl MO C-C	Clone-Clone	h6b16	9.24	392.346	19.551	4047.268	14.89
Ctrl MO C-C	Clone-Clone	h6b16	9.24	193.016	28.158	1102.296	14.89
Ctrl MO C-C	Clone-Clone	h6b16	9.24	136.579	1.757	553.205	14.89
Ctrl MO C-C	Clone-Clone	h6b16	9.24	117.932	2.502	999.99	14.89
Ctrl MO C-C	Clone-Clone	h7b1	8.97	681.766	73.704	4089.916	14.497
Ctrl MO C-C	Clone-Clone	h7b1	8.97	563.309	55.896	3573.522	14.497
Ctrl MO C-C	Clone-Clone	h7b1	8.97	351.984	24.017	1718.865	14.497
Ctrl MO C-C	Clone-Clone	h7b1	8.97	197.846	23.25	872.442	14.497
Ctrl MO C-C	Clone-Clone	h7b1	8.97	129.659	5.299	607.682	14.497
Ctrl MO N-C	Non Clone- Clone	h2b1	14.643	442.678	55.955	3137.546	23.721
Ctrl MO N-C	Non Clone- Clone	h2b1	14.643	459.431	57.76	1972.944	23.721
Ctrl MO N-C	Non Clone- Clone	h2b1	14.643	453.509	69.643	2969.136	23.721
Ctrl MO N-C	Non Clone- Clone	h2b1	14.643	426.362	29.811	2212.149	23.721
Ctrl MO N-C	Non Clone- Clone	h2b1	7.889	606.716	88.445	3710.09	12.739
Ctrl MO N-C	Non Clone- Clone	h2b1	7.889	412.712	48.608	1831.066	12.739
Ctrl MO N-C	Non Clone- Clone	h2b1	7.889	325.636	53.641	1210.64	12.739
Ctrl MO N-C	Non Clone- Clone	h2b1	7.889	271.766	35.439	1482.424	12.739
Ctrl MO N-C	Non Clone- Clone	h2b2	8.051	270.834	2.181	1025.531	13
Ctrl MO N-C	Non Clone- Clone	h2b2	8.051	172.843	12.775	1036.848	13
Ctrl MO N-C	Non Clone- Clone	h2b2	8.051	170.068	19.601	932.672	13
Ctrl MO N-C	Non Clone- Clone	h2b2	8.051	201.525	16.85	1705.553	13
Ctrl MO N-C	Non Clone- Clone	h2b3	11.293	576.931	108.004	3188.584	18.274
Ctrl MO N-C	Non Clone- Clone	h2b3	11.293	551.899	91.3	2094.127	18.274
Ctrl MO N-C	Non Clone- Clone	h2b3	11.293	502.045	62.902	1780.294	18.274
Ctrl MO N-C	Non Clone- Clone	h2b3	11.293	423.786	24.208	3698.672	18.274
Ctrl MO N-C	Non Clone- Clone	h2b3	11.293	299.343	25.334	1870.548	18.274
Ctrl MO N-C	Non Clone- Clone	h2b3	6.592	64.371	2.162	228.48	10.631
Ctrl MO N-C	Non Clone- Clone	h2b3	6.592	147.505	3.69	618.555	10.631
Ctrl MO N-C	Non Clone- Clone	h2b3	6.592	261.482	15.949	1276.989	10.631
Ctrl MO N-C	Non Clone- Clone	h2b3	6.592	314.111	15.019	1362.005	10.631
Ctrl MO N-C	Non Clone- Clone	h2b3	6.592	302.047	10.421	1491.054	10.631
Ctrl MO N-C	Non Clone- Clone	h2b3	6.592	240.105	6.023	1057.757	10.631
Ctrl MO N-C	Non Clone- Clone	h2b3	6.592	154.005	5.679	709.165	10.631
Ctrl MO N-C	Non Clone- Clone	h2b4	2.864	677.165	185.133	2392.149	4.568
Ctrl MO N-C	Non Clone- Clone	h2b4	2.864	380.122	154.571	726.748	4.568
Ctrl MO N-C	Non Clone- Clone	h2b4	2.864	173.194	33.167	337.195	4.568
Ctrl MO N-C	Non Clone- Clone	h2b4	2.864	139.742	44.797	363.722	4.568
Ctrl MO N-C	Non Clone- Clone	h2b5	8.375	521.97	123.324	1467.297	13.529
Ctrl MO N-C	Non Clone- Clone	h2b5	8.375	456.351	91.342	1577.486	13.529
Ctrl MO N-C	Non Clone- Clone	h2b5	8.375	372.866	85.201	1383.124	13.529
Ctrl MO N-C	Non Clone- Clone	h2b5	8.375	332.547	44.424	3355.678	13.529
Ctrl MO N-C	Non Clone- Clone	h2b5	8.375	376.803	29.738	3793.024	13.529
Ctrl MO N-C	Non Clone- Clone	h2b6	7.619	321.769	44.761	1176.465	12.251
Ctrl MO N-C	Non Clone- Clone	h2b6	7.619	347.511	52.442	1353.951	12.251
Ctrl MO N-C	Non Clone- Clone	h2b6	7.619	353.54	37.647	1654.614	12.251
Ctrl MO N-C	Non Clone- Clone	h2b6	7.619	356.421	50.315	2922.802	12.251
Ctrl MO N-C	Non Clone- Clone	h2b6	7.619	295.54	34.481	1187.281	12.251
Ctrl MO N-C	Non Clone- Clone	h2b6	7.619	260.778	29.115	923.546	12.251
Ctrl MO N-C	Non Clone- Clone	h3b1	10.483	93.235	0.551	405.346	16.954
Ctrl MO N-C	Non Clone- Clone	h3b1	10.483	187.96	4.212	990.183	16.954
Ctrl MO N-C	Non Clone- Clone	h3b1	10.483	287.842	16.668	1362.123	16.954
Ctrl MO N-C	Non Clone- Clone	h3b1	10.483	338.316	18.117	1228.393	16.954
Ctrl MO N-C	Non Clone- Clone	h3b1	10.483	361.222	27.2	1258.933	16.954
Ctrl MO N-C	Non Clone- Clone	h3b1	10.483	278.457	17.251	1478.017	16.954
Ctrl MO N-C	Non Clone- Clone	h3b10	7.403	407.864	58.528	1307.752	11.949
Ctrl MO N-C	Non Clone- Clone	h3b10	7.403	320.093	37.094	861.152	11.949
Ctrl MO N-C	Non Clone- Clone	h3b10	7.403	221.264	16.954	830.31	11.949
Ctrl MO N-C	Non Clone- Clone	h3b10	7.403	122.141	10.937	542.424	11.949
Ctrl MO N-C	Non Clone- Clone	h3b10	7.403	59.326	0.011	213.457	11.949
Ctrl MO N-C	Non Clone- Clone	h3b11	7.295	398.439	58.949	1158.552	11.773
Ctrl MO N-C	Non Clone- Clone	h3b11	7.295	427.383	42.228	1055.446	11.773
Ctrl MO N-C	Non Clone- Clone	h3b11	7.295	371.213	46.66	1048.878	11.773
Ctrl MO N-C	Non Clone- Clone	h3b11	7.295	292.582	15.195	983.106	11.773
Ctrl MO N-C	Non Clone- Clone	h3b11	7.295	184.925	16.025	467.221	11.773
Ctrl MO N-C	Non Clone- Clone	h3b12	7.078	471.013	23.692	2197.482	11.414
Ctrl MO N-C	Non Clone- Clone	h3b12	7.078	254.664	11.695	784.643	11.414
Ctrl MO N-C	Non Clone- Clone	h3b12	7.078	140.689	7.74	463.199	11.414
Ctrl MO N-C	Non Clone- Clone	h3b12	7.078	95.398	9.484	388.577	11.414
Ctrl MO N-C	Non Clone- Clone	h3b12	7.078	58.141	0.442	320.053	11.414
Ctrl MO N-C	Non Clone- Clone	h3b13	5.295	295.499	44.324	1210.562	8.517
Ctrl MO N-C	Non Clone- Clone	h3b13	5.295	274.346	9.547	1257.443	8.517
Ctrl MO N-C	Non Clone- Clone	h3b13	5.295	230.768	5.596	1081.075	8.517
Ctrl MO N-C	Non Clone- Clone	h3b13	5.295	184.707	0.177	826.479	8.517
Ctrl MO N-C	Non Clone- Clone	h3b13	5.295	115.962	0.227	725.665	8.517
Ctrl MO N-C	Non Clone- Clone	h3b13	5.295	65.518	0	390.48	8.517
Ctrl MO N-C	Non Clone- Clone	h3b13	5.295	55.09	0	301.7	8.517
Ctrl MO N-C	Non Clone- Clone	h3b2	10.212	110.791	3.397	514.302	16.517
Ctrl MO N-C	Non Clone- Clone	h3b2	10.212	237.643	14.544	1215.938	16.517
Ctrl MO N-C	Non Clone- Clone	h3b2	10.212	369.159	14.282	1076.367	16.517
Ctrl MO N-C	Non Clone- Clone	h3b2	10.212	367.526	19.51	1099.642	16.517
Ctrl MO N-C	Non Clone- Clone	h3b4	10.266	132.118	6.893	740.897	16.605
Ctrl MO N-C	Non Clone- Clone	h3b4	10.266	240.489	11.615	1936.964	16.605
Ctrl MO N-C	Non Clone- Clone	h3b4	10.321	401.054	63.469	1538.562	16.693
Ctrl MO N-C	Non Clone- Clone	h3b4	10.321	401.445	59.185	1630.295	16.693
Ctrl MO N-C	Non Clone- Clone	h3b4	10.321	297.611	47.517	1679.24	16.693
Ctrl MO N-C	Non Clone- Clone	h3b5	7.943	155.642	1.732	711.63	12.827
Ctrl MO N-C	Non Clone- Clone	h3b5	7.943	283.635	15.533	1966.225	12.827
Ctrl MO N-C	Non Clone- Clone	h3b5	7.943	269.1	2.336	1480.513	12.827
Ctrl MO N-C	Non Clone- Clone	h3b5	7.943	238.186	6.494	1363.661	12.827
Ctrl MO N-C	Non Clone- Clone	h3b6	11.455	65.566	1.794	282.12	18.538
Ctrl MO N-C	Non Clone- Clone	h3b6	11.455	151.163	3.307	517.78	18.538
Ctrl MO N-C	Non Clone- Clone	h3b6	11.455	244.754	14.242	982.541	18.538
Ctrl MO N-C	Non Clone- Clone	h3b6	11.455	268.719	27.479	1133.007	18.538
Ctrl MO N-C	Non Clone- Clone	h3b6	11.455	278.426	16.165	1345.899	18.538
Ctrl MO N-C	Non Clone- Clone	h3b7	5.511	129.488	4.497	604.696	8.874
Ctrl MO N-C	Non Clone- Clone	h3b7	5.511	189.69	1.018	1214.525	8.874
Ctrl MO N-C	Non Clone- Clone	h3b7	5.728	270.825	40.871	821.172	9.225
Ctrl MO N-C	Non Clone- Clone	h3b7	5.728	373.611	26.476	1098.256	9.225
Ctrl MO N-C	Non Clone- Clone	h3b7	5.728	350.388	18.951	1514.271	9.225
Ctrl MO N-C	Non Clone- Clone	h3b7	5.728	294.594	19.21	1783.245	9.225
Ctrl MO N-C	Non Clone- Clone	h3b8	8.483	142.1	0.381	656.163	13.704
Ctrl MO N-C	Non Clone- Clone	h3b8	8.483	236.14	6.933	1595.967	13.704
Ctrl MO N-C	Non Clone- Clone	h3b8	8.483	267.38	11.47	1739.141	13.704
Ctrl MO N-C	Non Clone- Clone	h3b8	8.321	429.693	34.039	2293.986	13.442
Ctrl MO N-C	Non Clone- Clone	h3b8	8.321	341.495	25.561	1531.277	13.442
Ctrl MO N-C	Non Clone- Clone	h3b9	7.889	133.515	2.754	524.335	12.739
Ctrl MO N-C	Non Clone- Clone	h3b9	7.889	243.045	4.722	680.665	12.739
Ctrl MO N-C	Non Clone- Clone	h3b9	7.889	329.063	17.204	1031.955	12.739
Ctrl MO N-C	Non Clone- Clone	h3b9	7.889	340.781	32.233	1153.55	12.739
Ctrl MO N-C	Non Clone- Clone	h3b9	7.889	294.132	22.857	1375.82	12.739
Ctrl MO N-C	Non Clone- Clone	h4b1	11.888	327.842	41.928	3156.891	19.241
Ctrl MO N-C	Non Clone- Clone	h4b1	11.888	351.859	50.05	1758.57	19.241
Ctrl MO N-C	Non Clone- Clone	h4b1	11.888	338.791	56.563	1612.421	19.241
Ctrl MO N-C	Non Clone- Clone	h4b1	11.888	282.543	39.044	1905.691	19.241
Ctrl MO N-C	Non Clone- Clone	h4b1	11.888	175.231	16.705	1047.296	19.241
Ctrl MO N-C	Non Clone- Clone	h4b1	11.888	108.476	6.358	655.605	19.241
Ctrl MO N-C	Non Clone- Clone	h4b10	6.052	302.56	22.545	1575.023	9.752
Ctrl MO N-C	Non Clone- Clone	h4b10	6.052	137.712	15.892	415.088	9.752
Ctrl MO N-C	Non Clone- Clone	h4b10	6.052	80.696	7.486	251.566	9.752
Ctrl MO N-C	Non Clone- Clone	h4b10	6.052	56.555	3.537	181.927	9.752
Ctrl MO N-C	Non Clone- Clone	h4b10	6.052	38.528	0	145.426	9.752
Ctrl MO N-C	Non Clone- Clone	h4b11	10.212	602.52	42.028	2452.644	16.517
Ctrl MO N-C	Non Clone- Clone	h4b11	10.212	485.358	37.665	2525.938	16.517
Ctrl MO N-C	Non Clone- Clone	h4b11	10.212	239.984	31.736	1075.727	16.517
Ctrl MO N-C	Non Clone- Clone	h4b11	10.212	129.424	5.381	1033.353	16.517
Ctrl MO N-C	Non Clone- Clone	h4b11	10.212	93.944	1.374	501.391	16.517
Ctrl MO N-C	Non Clone- Clone	h4b2	13.725	472.546	49.695	3444.069	22.228
Ctrl MO N-C	Non Clone- Clone	h4b2	13.725	400.034	55.679	2838.612	22.228
Ctrl MO N-C	Non Clone- Clone	h4b2	14.265	344.802	45.398	4095	23.106
Ctrl MO N-C	Non Clone- Clone	h4b2	14.265	231.733	28.659	4049.726	23.106
Ctrl MO N-C	Non Clone- Clone	h4b2	14.265	116.185	5.096	501.351	23.106
Ctrl MO N-C	Non Clone- Clone	h4b3	8.483	570.261	64.227	4095	13.706
Ctrl MO N-C	Non Clone- Clone	h4b3	8.483	596.732	84.63	4045.87	13.706
Ctrl MO N-C	Non Clone- Clone	h4b3	8.483	487.221	65.579	2061.985	13.706
Ctrl MO N-C	Non Clone- Clone	h4b3	8.483	291.085	27.409	1595.818	13.706
Ctrl MO N-C	Non Clone- Clone	h4b3	8.483	173.419	13.026	1765.903	13.706
Ctrl MO N-C	Non Clone- Clone	h4b3	8.483	156.83	3.248	4095	13.706
Ctrl MO N-C	Non Clone- Clone	h4b4	10.158	434.917	17.853	3499.488	16.43
Ctrl MO N-C	Non Clone- Clone	h4b4	10.158	297.612	4.288	980.45	16.43
Ctrl MO N-C	Non Clone- Clone	h4b4	10.158	181.468	4.455	1117.536	16.43
Ctrl MO N-C	Non Clone- Clone	h4b4	10.158	124.567	1.477	861.851	16.43
Ctrl MO N-C	Non Clone- Clone	h4b5	4.593	461.364	25.54	4095	7.38
Ctrl MO N-C	Non Clone- Clone	h4b5	4.593	454.55	45.701	4007.796	7.38
Ctrl MO N-C	Non Clone- Clone	h4b5	4.593	345.23	39.039	1287.223	7.38
Ctrl MO N-C	Non Clone- Clone	h4b5	4.593	242.312	36.31	1241.218	7.38
Ctrl MO N-C	Non Clone- Clone	h4b5	4.593	269.239	22.407	3866.234	7.38
Ctrl MO N-C	Non Clone- Clone	h4b6	10.104	509.966	67.516	4095	16.342
Ctrl MO N-C	Non Clone- Clone	h4b6	10.104	417.226	53.02	2051.812	16.342
Ctrl MO N-C	Non Clone- Clone	h4b6	10.104	342.695	31.208	2790.144	16.342
Ctrl MO N-C	Non Clone- Clone	h4b6	10.104	253.406	13.976	1822.32	16.342
Ctrl MO N-C	Non Clone- Clone	h4b6	10.104	217.15	11.14	3697.283	16.342
Ctrl MO N-C	Non Clone- Clone	h4b6	10.104	177.53	7.753	2216.069	16.342
Ctrl MO N-C	Non Clone- Clone	h4b7	11.239	426.158	25.085	3493.283	18.187
Ctrl MO N-C	Non Clone- Clone	h4b7	11.239	367.442	10.091	2811.355	18.187
Ctrl MO N-C	Non Clone- Clone	h4b7	11.239	262.645	5.496	1252.096	18.187
Ctrl MO N-C	Non Clone- Clone	h4b7	11.239	152.918	8.033	603.587	18.187
Ctrl MO N-C	Non Clone- Clone	h4b7	11.239	123.645	6.029	925.181	18.187
Ctrl MO N-C	Non Clone- Clone	h4b8	9.834	551.104	91.575	3699.162	15.902
Ctrl MO N-C	Non Clone- Clone	h4b8	9.834	493.282	42.471	2059.227	15.902
Ctrl MO N-C	Non Clone- Clone	h4b8	9.834	417.624	32.49	2120.011	15.902
Ctrl MO N-C	Non Clone- Clone	h4b8	9.834	362.045	12.385	2034.983	15.902
Ctrl MO N-C	Non Clone- Clone	h4b8	9.834	278.199	20.097	4092.542	15.902
Ctrl MO N-C	Non Clone- Clone	h4b8	9.834	222.819	6.553	4095	15.902
Ctrl MO N-C	Non Clone- Clone	h4b9	7.187	524.037	80.128	4095	11.597
Ctrl MO N-C	Non Clone- Clone	h4b9	7.187	380.124	49.465	4032.917	11.597
Ctrl MO N-C	Non Clone- Clone	h4b9	7.187	159.801	3.138	871.785	11.597
Ctrl MO N-C	Non Clone- Clone	h4b9	7.187	79.896	4.347	288.578	11.597
Ctrl MO N-C	Non Clone- Clone	h4b9	7.187	62.489	0.928	339.419	11.597
Ctrl MO N-C	Non Clone- Clone	h5b1	11.131	631.555	54.488	3784.607	18.011
Ctrl MO N-C	Non Clone- Clone	h5b1	11.131	628.757	102.716	4064.479	18.011
Ctrl MO N-C	Non Clone- Clone	h5b1	11.131	462.61	65.482	4095	18.011
Ctrl MO N-C	Non Clone- Clone	h5b1	11.131	318.968	26.772	4030.859	18.011
Ctrl MO N-C	Non Clone- Clone	h5b1	11.131	318.968	26.772	4030.859	18.011
Ctrl MO N-C	Non Clone- Clone	h5b1	11.131	296.737	3.692	4095	18.011
Ctrl MO N-C	Non Clone- Clone	h5b2	6.916	599.943	89.004	4095	11.158
Ctrl MO N-C	Non Clone- Clone	h5b2	6.916	585.045	125.5	3690.633	11.158
Ctrl MO N-C	Non Clone- Clone	h5b2	6.916	359.846	40.356	1309.945	11.158
Ctrl MO N-C	Non Clone- Clone	h5b2	6.916	180.288	1.593	1180.771	11.158
Ctrl MO N-C	Non Clone- Clone	h5b3	13.455	649.092	43.45	3887.985	21.789
Ctrl MO N-C	Non Clone- Clone	h5b3	13.455	533.068	48.757	1986.037	21.789
Ctrl MO N-C	Non Clone- Clone	h5b3	13.455	454.893	44.338	1811.11	21.789
Ctrl MO N-C	Non Clone- Clone	h5b3	13.455	375.081	11.402	4081.663	21.789
Ctrl MO N-C	Non Clone- Clone	h5b4	5.025	687.131	58.581	4095	8.083
Ctrl MO N-C	Non Clone- Clone	h5b4	5.025	376.315	60.807	3224.241	8.083
Ctrl MO N-C	Non Clone- Clone	h5b4	5.025	220.449	39.378	871.107	8.083
Ctrl MO N-C	Non Clone- Clone	h5b4	5.025	141.768	20.415	382.109	8.083
Ctrl MO N-C	Non Clone- Clone	h5b5	4.539	543.716	129.547	1522.24	7.292
Ctrl MO N-C	Non Clone- Clone	h5b5	4.539	438.117	48.391	1250.437	7.292
Ctrl MO N-C	Non Clone- Clone	h5b5	4.539	335.609	13.982	1159.231	7.292
Ctrl MO N-C	Non Clone- Clone	h5b5	4.539	269.783	67.124	1728.627	7.292
Ctrl MO N-C	Non Clone- Clone	h5b6	7.565	469.616	67.747	2260.436	12.212
Ctrl MO N-C	Non Clone- Clone	h5b6	7.565	327.98	61.43	2263.318	12.212
Ctrl MO N-C	Non Clone- Clone	h5b6	7.565	285.571	48.285	1920.989	12.212
Ctrl MO N-C	Non Clone- Clone	h5b6	7.565	246.027	45.464	1126.113	12.212
Ctrl MO N-C	Non Clone- Clone	h5b7	9.294	653.357	89.681	4081.279	15.024
Ctrl MO N-C	Non Clone- Clone	h5b7	9.294	618.799	57.922	4095	15.024
Ctrl MO N-C	Non Clone- Clone	h5b7	9.294	465.677	37.489	4095	15.024
Ctrl MO N-C	Non Clone- Clone	h5b7	9.294	295.743	2.402	2742.453	15.024
Ctrl MO N-C	Non Clone- Clone	h5b7	9.294	154.18	10.933	832.902	15.024
Ctrl MO N-C	Non Clone- Clone	h5b7	9.294	128.283	8.832	674.304	15.024
Ctrl MO N-C	Non Clone- Clone	h6b1	9.186	418.107	46.858	2108.165	14.848
Ctrl MO N-C	Non Clone- Clone	h6b1	9.186	361.938	34.766	1699.908	14.848
Ctrl MO N-C	Non Clone- Clone	h6b1	9.186	277.443	29.051	1270.71	14.848
Ctrl MO N-C	Non Clone- Clone	h6b1	9.186	239.656	17.056	1467.567	14.848
Ctrl MO N-C	Non Clone- Clone	h6b1	9.186	231.006	4.864	1762.824	14.848
Ctrl MO N-C	Non Clone- Clone	h6b1	9.186	189.732	5.667	1432.524	14.848
Ctrl MO N-C	Non Clone- Clone	h6b10	12.05	578.648	0	4095	19.505
Ctrl MO N-C	Non Clone- Clone	h6b10	12.05	284.032	0	1438.154	19.505
Ctrl MO N-C	Non Clone- Clone	h6b10	12.05	192.753	0	595.97	19.505
Ctrl MO N-C	Non Clone- Clone	h6b10	12.05	112.743	0	614.269	19.505
Ctrl MO N-C	Non Clone- Clone	h6b10	12.05	76.47	0	561.488	19.505
Ctrl MO N-C	Non Clone- Clone	h6b2	11.023	459.904	63.127	3551.533	17.835
Ctrl MO N-C	Non Clone- Clone	h6b2	11.023	409.323	47.68	2172.62	17.835
Ctrl MO N-C	Non Clone- Clone	h6b2	11.023	320.513	24.376	2465.414	17.835
Ctrl MO N-C	Non Clone- Clone	h6b2	11.023	152.144	5.408	1972.334	17.835
Ctrl MO N-C	Non Clone- Clone	h6b2	11.023	114.838	2.937	574.551	17.835
Ctrl MO N-C	Non Clone- Clone	h6b3	7.024	638.19	74.754	3607.917	11.334
Ctrl MO N-C	Non Clone- Clone	h6b3	7.024	557.066	33.721	2902.927	11.334
Ctrl MO N-C	Non Clone- Clone	h6b3	7.024	476.133	41.716	3766.184	11.334
Ctrl MO N-C	Non Clone- Clone	h6b3	7.024	326.561	36.243	3031.398	11.334
Ctrl MO N-C	Non Clone- Clone	h6b3	7.024	202.11	16.113	852.937	11.334
Ctrl MO N-C	Non Clone- Clone	h6b3	7.024	137.008	17.6	772.95	11.334
Ctrl MO N-C	Non Clone- Clone	h6b3	7.024	107.264	2.612	627.374	11.334
Ctrl MO N-C	Non Clone- Clone	h6b4	7.997	593.156	101.56	4006.727	12.915
Ctrl MO N-C	Non Clone- Clone	h6b4	7.997	469.385	85.626	1892.249	12.915
Ctrl MO N-C	Non Clone- Clone	h6b4	7.997	368.148	60.496	3973.569	12.915
Ctrl MO N-C	Non Clone- Clone	h6b4	7.997	344.74	43.324	4095	12.915
Ctrl MO N-C	Non Clone- Clone	h6b4	7.997	316.741	31.195	4095	12.915
Ctrl MO N-C	Non Clone- Clone	h6b5	7.349	428.428	68.172	3711.179	11.861
Ctrl MO N-C	Non Clone- Clone	h6b5	7.349	320.411	42.998	1046.242	11.861
Ctrl MO N-C	Non Clone- Clone	h6b5	7.349	253.619	28.522	1525.774	11.861
Ctrl MO N-C	Non Clone- Clone	h6b5	7.349	246.304	14.588	1952.57	11.861
Ctrl MO N-C	Non Clone- Clone	h6b5	7.349	261.074	8.102	3639.315	11.861
Ctrl MO N-C	Non Clone- Clone	h6b5	7.349	257.452	18.004	4037.706	11.861
Ctrl MO N-C	Non Clone- Clone	h6b6	10.158	493.925	32.543	3770.622	16.429
Ctrl MO N-C	Non Clone- Clone	h6b6	10.158	503.285	53.459	3671.917	16.429
Ctrl MO N-C	Non Clone- Clone	h6b6	10.158	309.449	32.555	3042.382	16.429
Ctrl MO N-C	Non Clone- Clone	h6b6	10.158	186.923	14.879	1421.316	16.429
Ctrl MO N-C	Non Clone- Clone	h6b6	10.158	166.42	4.458	1960.398	16.429
Ctrl MO N-C	Non Clone- Clone	h6b7	6.322	642.511	103.196	4095	10.191
Ctrl MO N-C	Non Clone- Clone	h6b7	6.322	717.482	95.367	4095	10.191
Ctrl MO N-C	Non Clone- Clone	h6b7	6.322	670.996	89.965	3671.642	10.191
Ctrl MO N-C	Non Clone- Clone	h6b7	6.322	489.96	45.893	1955.504	10.191
Ctrl MO N-C	Non Clone- Clone	h6b7	6.322	280.482	32.818	2308.617	10.191
Ctrl MO N-C	Non Clone- Clone	h6b8	6.754	374.021	28.816	1625.653	10.894
Ctrl MO N-C	Non Clone- Clone	h6b8	6.754	281.54	31.179	1142.909	10.894
Ctrl MO N-C	Non Clone- Clone	h6b8	6.754	123.604	13.534	362.481	10.894
Ctrl MO N-C	Non Clone- Clone	h6b8	6.754	81.786	4.382	290.888	10.894
Ctrl MO N-C	Non Clone- Clone	h6b8	6.754	86.443	6.203	370.623	10.894
Ctrl MO N-C	Non Clone- Clone	h6b9	8.105	487.118	26.983	3037.504	13.091
Ctrl MO N-C	Non Clone- Clone	h6b9	8.105	367.707	35.43	1551.048	13.091
Ctrl MO N-C	Non Clone- Clone	h6b9	8.105	258.742	20.925	1825.785	13.091
Ctrl MO N-C	Non Clone- Clone	h6b9	8.105	237.572	8.231	2558.536	13.091
Ctrl MO N-C	Non Clone- Clone	h6b9	8.105	167.491	7.876	1737.106	13.091
Ctrl MO N-C	Non Clone- Clone	h7b1	13.509	416.472	43.556	3985.169	21.877
Ctrl MO N-C	Non Clone- Clone	h7b1	13.509	453.853	56.526	3714.745	21.877
Ctrl MO N-C	Non Clone- Clone	h7b1	13.509	423.991	17.467	4095	21.877
Ctrl MO N-C	Non Clone- Clone	h7b1	13.509	276.447	5.751	3911.318	21.877
Ctrl MO N-C	Non Clone- Clone	h7b1	13.509	218.348	5.088	3444.154	21.877
Ctrl MO N-C	Non Clone- Clone	h7b3	13.022	506.089	44.38	3732.942	21.086
Ctrl MO N-C	Non Clone- Clone	h7b3	13.022	485.7	48.441	3823.208	21.086
Ctrl MO N-C	Non Clone- Clone	h7b3	13.022	414.821	31.854	4095	21.086
Ctrl MO N-C	Non Clone- Clone	h7b3	13.022	310.2	3.869	4095	21.086
Ctrl MO N-C	Non Clone- Clone	h7b3	13.022	180.408	2.539	1325.433	21.086
Ctrl MO N-C	Non Clone- Clone	h7b3	13.022	118.045	4.242	805.44	21.086
Ctrl MO N-C	Non Clone- Clone	h7b4	15.4	408.863	21.024	2860.67	24.952
Ctrl MO N-C	Non Clone- Clone	h7b4	15.4	424.393	25.754	3835.789	24.952
Ctrl MO N-C	Non Clone- Clone	h7b4	15.4	357.47	8.447	3100.846	24.952
Ctrl MO N-C	Non Clone- Clone	h7b4	15.4	258.685	15.781	1531.757	24.952
Ctrl MO N-C	Non Clone- Clone	h7b4	15.4	213.012	1.984	1495.353	24.952
Ctrl MO N-C	Non Clone- Clone	h7b5	9.726	354.088	26.96	2916.237	15.727
Ctrl MO N-C	Non Clone- Clone	h7b5	9.726	200.738	12.242	919.353	15.727
Ctrl MO N-C	Non Clone- Clone	h7b5	9.726	143.776	12.095	559.506	15.727
Ctrl MO N-C	Non Clone- Clone	h7b5	9.726	113.208	5.908	701.617	15.727
Ctrl MO N-C	Non Clone- Clone	h7b5	9.726	93.976	5.682	531.43	15.727
Ctrl MO N-C	Non Clone- Clone	h7b5	9.726	73.531	0.463	482.519	15.727
Ctrl MO N-N	Non Clone- Non Clone	h2b1	7.403	347.038	57.248	1679.879	11.949
Ctrl MO N-N	Non Clone- Non Clone	h2b1	7.403	310.204	43.907	1543.321	11.949
Ctrl MO N-N	Non Clone- Non Clone	h2b1	7.403	269.18	53.792	1075.719	11.949
Ctrl MO N-N	Non Clone- Non Clone	h2b1	7.403	234.056	20.44	888.63	11.949
Ctrl MO N-N	Non Clone- Non Clone	h2b1	7.403	232.941	30.685	2294.523	11.949
Ctrl MO N-N	Non Clone- Non Clone	h2b2	5.566	349.419	64.609	1981.995	8.962
Ctrl MO N-N	Non Clone- Non Clone	h2b2	5.566	339.759	44.31	1553.122	8.962
Ctrl MO N-N	Non Clone- Non Clone	h2b2	5.457	481.171	87.244	1740.975	8.786
Ctrl MO N-N	Non Clone- Non Clone	h2b2	5.457	372.641	5.852	1120.345	8.786
Ctrl MO N-N	Non Clone- Non Clone	h2b2	5.457	336.487	7.563	1726.958	8.786
Ctrl MO N-N	Non Clone- Non Clone	h2b2	5.457	308.515	19.225	2553.65	8.786
Ctrl MO N-N	Non Clone- Non Clone	h2b3	5.079	617.599	89.847	2535.457	8.171
Ctrl MO N-N	Non Clone- Non Clone	h2b3	5.079	542.855	71.294	1577.745	8.171
Ctrl MO N-N	Non Clone- Non Clone	h2b3	5.079	510.966	37.481	4078.302	8.171
Ctrl MO N-N	Non Clone- Non Clone	h2b3	5.079	481.811	16.937	4095	8.171
Ctrl MO N-N	Non Clone- Non Clone	h2b4	8.97	549.929	59.351	2327.695	14.468
Ctrl MO N-N	Non Clone- Non Clone	h2b4	8.97	374.243	72.268	1202.614	14.468
Ctrl MO N-N	Non Clone- Non Clone	h2b4	8.97	280.037	60.982	832.727	14.468
Ctrl MO N-N	Non Clone- Non Clone	h2b4	8.97	218.74	36.638	1220.675	14.468
Ctrl MO N-N	Non Clone- Non Clone	h2b5	8.7	660.919	123.636	4056.882	14.057
Ctrl MO N-N	Non Clone- Non Clone	h2b5	8.7	604.923	95.923	3240.513	14.057
Ctrl MO N-N	Non Clone- Non Clone	h2b5	8.7	535.833	76.562	3525.651	14.057
Ctrl MO N-N	Non Clone- Non Clone	h2b5	8.7	453.873	66.54	2412.154	14.057
Ctrl MO N-N	Non Clone- Non Clone	h2b5	8.7	353.614	53.63	1345.865	14.057
Ctrl MO N-N	Non Clone- Non Clone	h2b5	9.888	298.594	14.61	1041.907	15.99
Ctrl MO N-N	Non Clone- Non Clone	h2b5	9.888	240.338	28.775	765.083	15.99
Ctrl MO N-N	Non Clone- Non Clone	h2b5	9.888	176.826	15.939	1010.496	15.99
Ctrl MO N-N	Non Clone- Non Clone	h2b6	6.16	681.919	164.594	3227.864	9.878
Ctrl MO N-N	Non Clone- Non Clone	h2b6	6.16	665.459	101.997	3502.762	9.878
Ctrl MO N-N	Non Clone- Non Clone	h2b6	6.16	586.509	101.373	2319.001	9.878
Ctrl MO N-N	Non Clone- Non Clone	h2b6	6.16	418.08	78.6	1334.818	9.878
Ctrl MO N-N	Non Clone- Non Clone	h2b6	6.16	246.369	47.472	790.752	9.878
Ctrl MO N-N	Non Clone- Non Clone	h2b7	8.645	384.824	70.703	1190.017	13.969
Ctrl MO N-N	Non Clone- Non Clone	h2b7	8.645	369.442	36.097	1831.806	13.969
Ctrl MO N-N	Non Clone- Non Clone	h2b7	8.645	306.042	6.969	2370.515	13.969
Ctrl MO N-N	Non Clone- Non Clone	h2b7	10.969	366.063	57.357	1658.994	17.747
Ctrl MO N-N	Non Clone- Non Clone	h2b7	10.969	318.07	51.669	1945.405	17.747
Ctrl MO N-N	Non Clone- Non Clone	h2b7	10.969	265.174	29.387	987.017	17.747
Ctrl MO N-N	Non Clone- Non Clone	h2b7	10.969	176.826	5.774	958.216	17.747
Ctrl MO N-N	Non Clone- Non Clone	h2b8	7.997	582.214	84.956	2761.286	12.915
Ctrl MO N-N	Non Clone- Non Clone	h2b8	7.997	444.706	51.162	1542.713	12.915
Ctrl MO N-N	Non Clone- Non Clone	h2b8	7.997	347.875	51.512	1165.153	12.915
Ctrl MO N-N	Non Clone- Non Clone	h2b8	7.997	259.847	31.861	1114.432	12.915
Ctrl MO N-N	Non Clone- Non Clone	h2b8	7.997	213.126	41.794	1544.878	12.915
Ctrl MO N-N	Non Clone- Non Clone	h2b8	7.997	163.485	13.931	1889.802	12.915
Ctrl MO N-N	Non Clone- Non Clone	h2b8	7.997	149.215	6.77	3324.496	12.915
Ctrl MO N-N	Non Clone- Non Clone	h2b9	9.942	487.495	96.095	2253.535	16.078
Ctrl MO N-N	Non Clone- Non Clone	h2b9	9.942	381.091	64.193	1417.663	16.078
Ctrl MO N-N	Non Clone- Non Clone	h2b9	9.942	358.164	48.584	2029.512	16.078
Ctrl MO N-N	Non Clone- Non Clone	h2b9	9.942	331.009	50.899	2008.135	16.078
Ctrl MO N-N	Non Clone- Non Clone	h2b9	9.942	278.28	8.587	2245.091	16.078
Ctrl MO N-N	Non Clone- Non Clone	h2b9	9.942	205.104	12.978	1084.71	16.078
Ctrl MO N-N	Non Clone- Non Clone	h2b9	9.942	153.435	2.585	909.999	16.078
Ctrl MO N-N	Non Clone- Non Clone	h3b1	5.674	141.015	17.788	406.374	9.137
Ctrl MO N-N	Non Clone- Non Clone	h3b1	5.674	224.897	13.95	906.419	9.137
Ctrl MO N-N	Non Clone- Non Clone	h3b1	5.674	276.203	12.786	892.246	9.137
Ctrl MO N-N	Non Clone- Non Clone	h3b1	5.674	297.553	26.041	963.578	9.137
Ctrl MO N-N	Non Clone- Non Clone	h3b1	5.674	236.832	11.225	807.907	9.137
Ctrl MO N-N	Non Clone- Non Clone	h3b2	4.755	115.459	10.392	350.731	7.644
Ctrl MO N-N	Non Clone- Non Clone	h3b2	4.755	222.239	12.479	725.447	7.644
Ctrl MO N-N	Non Clone- Non Clone	h3b2	4.755	288.244	53.11	1077.729	7.644
Ctrl MO N-N	Non Clone- Non Clone	h3b2	4.755	305.593	43.414	1002.659	7.644
Ctrl MO N-N	Non Clone- Non Clone	h3b3	12.212	250.996	8.769	648.709	19.768
Ctrl MO N-N	Non Clone- Non Clone	h3b3	12.212	371.841	39.378	1144.216	19.768
Ctrl MO N-N	Non Clone- Non Clone	h3b3	12.212	359.804	65.657	1241.32	19.768
Ctrl MO N-N	Non Clone- Non Clone	h3b4	10.429	61.184	0.247	271.206	16.869
Ctrl MO N-N	Non Clone- Non Clone	h3b4	10.429	138.093	3.375	542.966	16.869
Ctrl MO N-N	Non Clone- Non Clone	h3b4	10.429	192.053	10.361	734.65	16.869
Ctrl MO N-N	Non Clone- Non Clone	h3b4	10.429	200.176	9.607	897.573	16.869
Ctrl MO N-N	Non Clone- Non Clone	h3b4	10.429	194.962	6.026	1357.547	16.869
Ctrl MO N-N	Non Clone- Non Clone	h3b5	7.565	278.377	17.182	928.844	12.212
Ctrl MO N-N	Non Clone- Non Clone	h3b5	7.565	197.685	15.216	747.933	12.212
Ctrl MO N-N	Non Clone- Non Clone	h3b5	7.565	145.121	21.227	465.486	12.212
Ctrl MO N-N	Non Clone- Non Clone	h3b5	7.565	101.125	6.181	369.791	12.212
Ctrl MO N-N	Non Clone- Non Clone	h3b5	7.565	81.737	2.633	550.771	12.212
Ctrl MO N-N	Non Clone- Non Clone	h4b1	8.051	382.283	29.665	3346.475	13.003
Ctrl MO N-N	Non Clone- Non Clone	h4b1	8.051	268.873	33.918	1234.725	13.003
Ctrl MO N-N	Non Clone- Non Clone	h4b1	8.051	234.903	7.411	3979.935	13.003
Ctrl MO N-N	Non Clone- Non Clone	h4b1	8.051	224.925	24.612	4095	13.003
Ctrl MO N-N	Non Clone- Non Clone	h4b1	8.051	214.337	10.717	4032.893	13.003
Ctrl MO N-N	Non Clone- Non Clone	h4b1	8.051	155.856	9.343	1012.484	13.003
Ctrl MO N-N	Non Clone- Non Clone	h4b2	7.349	461.066	53.517	2437.017	11.861
Ctrl MO N-N	Non Clone- Non Clone	h4b2	7.349	364.351	34.783	2380.445	11.861
Ctrl MO N-N	Non Clone- Non Clone	h4b2	7.349	280.353	16.971	2538.096	11.861
Ctrl MO N-N	Non Clone- Non Clone	h4b2	7.349	171.743	5.707	1013.176	11.861
Ctrl MO N-N	Non Clone- Non Clone	h4b2	7.349	140.066	5.293	1905.428	11.861
Ctrl MO N-N	Non Clone- Non Clone	h4b3	4.701	355.103	57.075	1587.638	7.556
Ctrl MO N-N	Non Clone- Non Clone	h4b3	4.701	376.731	25.97	1232.657	7.556
Ctrl MO N-N	Non Clone- Non Clone	h4b3	4.701	387.883	34.393	1546.734	7.556
Ctrl MO N-N	Non Clone- Non Clone	h4b3	4.701	307.399	47.798	1065.495	7.556
Ctrl MO N-N	Non Clone- Non Clone	h4b3	4.701	256.266	37.832	664.742	7.556
Ctrl MO N-N	Non Clone- Non Clone	h4b3	4.701	225.82	27.195	886.948	7.556
Ctrl MO N-N	Non Clone- Non Clone	h4b4	8.429	472.224	39.764	3241.597	13.618
Ctrl MO N-N	Non Clone- Non Clone	h4b4	8.429	438.375	47.356	1939.958	13.618
Ctrl MO N-N	Non Clone- Non Clone	h4b4	8.429	307.207	38.187	881.996	13.618
Ctrl MO N-N	Non Clone- Non Clone	h4b4	8.429	182.02	21.761	996.634	13.618
Ctrl MO N-N	Non Clone- Non Clone	h4b4	8.429	139.322	3.848	1333.604	13.618
Ctrl MO N-N	Non Clone- Non Clone	h4b4	8.429	123.698	2.565	3074.376	13.618
Ctrl MO N-N	Non Clone- Non Clone	h4b4	8.429	97.506	0	3128.594	13.618
Ctrl MO N-N	Non Clone- Non Clone	h4b5	13.238	356.717	44.757	1586.552	21.438
Ctrl MO N-N	Non Clone- Non Clone	h4b5	13.238	342.705	40.161	2056.804	21.438
Ctrl MO N-N	Non Clone- Non Clone	h4b5	13.238	314.195	39.451	2543.291	21.438
Ctrl MO N-N	Non Clone- Non Clone	h4b5	13.238	249.307	12.875	1738.668	21.438
Ctrl MO N-N	Non Clone- Non Clone	h4b5	13.238	186.21	6.87	3675.145	21.438
Ctrl MO N-N	Non Clone- Non Clone	h4b5	13.238	172.555	2.686	2839.69	21.438
Ctrl MO N-N	Non Clone- Non Clone	h5b1	13.779	556.684	61.462	4041.832	22.316
Ctrl MO N-N	Non Clone- Non Clone	h5b1	13.779	453.416	70.899	2000.324	22.316
Ctrl MO N-N	Non Clone- Non Clone	h5b1	13.779	366.419	23.582	2263.024	22.316
Ctrl MO N-N	Non Clone- Non Clone	h5b1	13.779	297.428	7.726	2123.826	22.316
Ctrl MO N-N	Non Clone- Non Clone	h5b1	13.779	232.226	19.355	2023.516	22.316
Ctrl MO N-N	Non Clone- Non Clone	h5b2	13.509	678.405	102.117	3908.381	21.877
Ctrl MO N-N	Non Clone- Non Clone	h5b2	13.509	554.304	81.086	3996.463	21.877
Ctrl MO N-N	Non Clone- Non Clone	h5b2	13.509	421.896	44.209	4075.327	21.877
Ctrl MO N-N	Non Clone- Non Clone	h5b2	13.509	283.844	23.517	2529.331	21.877
Ctrl MO N-N	Non Clone- Non Clone	h5b2	13.509	160.555	28.303	1069.652	21.877
Ctrl MO N-N	Non Clone- Non Clone	h5b3	7.781	442.017	57.083	2720.466	12.564
Ctrl MO N-N	Non Clone- Non Clone	h5b3	7.781	273.062	27.241	2347.963	12.564
Ctrl MO N-N	Non Clone- Non Clone	h5b3	7.781	141.49	6.499	850.615	12.564
Ctrl MO N-N	Non Clone- Non Clone	h5b3	7.781	117.641	4.366	649.505	12.564
Ctrl MO N-N	Non Clone- Non Clone	h5b3	7.781	93.615	0.512	366.125	12.564
Ctrl MO N-N	Non Clone- Non Clone	h5b4	7.133	595.896	119.663	4095	11.509
Ctrl MO N-N	Non Clone- Non Clone	h5b4	7.133	475.644	48.448	3687.549	11.509
Ctrl MO N-N	Non Clone- Non Clone	h5b4	7.133	242.739	38.68	1317.439	11.509
Ctrl MO N-N	Non Clone- Non Clone	h5b4	7.133	105.661	0.985	655.14	11.509
Ctrl MO N-N	Non Clone- Non Clone	h5b4	7.133	92.324	2.274	648.146	11.509
Ctrl MO N-N	Non Clone- Non Clone	h5b5	5.782	358.164	46.615	1085.62	9.313
Ctrl MO N-N	Non Clone- Non Clone	h5b5	5.782	258.714	26.975	1049.112	9.313
Ctrl MO N-N	Non Clone- Non Clone	h5b5	5.782	158.047	4.657	1389.08	9.313
Ctrl MO N-N	Non Clone- Non Clone	h5b5	5.782	151.713	12.922	1797.856	9.313
Ctrl MO N-N	Non Clone- Non Clone	h6b1	9.78	334.947	32.562	1369.438	15.815
Ctrl MO N-N	Non Clone- Non Clone	h6b1	9.78	282.451	29.724	3776.631	15.815
Ctrl MO N-N	Non Clone- Non Clone	h6b1	9.78	289.108	21.977	4095	15.815
Ctrl MO N-N	Non Clone- Non Clone	h6b1	9.78	235.191	22.194	2817.975	15.815
Ctrl MO N-N	Non Clone- Non Clone	h6b2	11.293	289.079	22.39	1774.844	18.274
Ctrl MO N-N	Non Clone- Non Clone	h6b2	11.293	247.219	18.424	1063.538	18.274
Ctrl MO N-N	Non Clone- Non Clone	h6b2	11.293	202.956	13.104	860.259	18.274
Ctrl MO N-N	Non Clone- Non Clone	h6b2	11.293	206.13	17.476	2223.632	18.274
Ctrl MO N-N	Non Clone- Non Clone	h6b2	11.293	204.244	7.001	3128.925	18.274
Ctrl MO N-N	Non Clone- Non Clone	h6b3	8.051	608.976	122.098	4081.274	13.003
Ctrl MO N-N	Non Clone- Non Clone	h6b3	8.051	522.878	38.225	3945.728	13.003
Ctrl MO N-N	Non Clone- Non Clone	h6b3	8.051	444.87	32.707	3734.536	13.003
Ctrl MO N-N	Non Clone- Non Clone	h6b3	8.051	289.818	15.186	1493.888	13.003
Ctrl MO N-N	Non Clone- Non Clone	h6b3	8.051	172.399	6.42	893.129	13.003
Ctrl MO N-N	Non Clone- Non Clone	h6b4	14.157	450.37	33.603	2961.357	22.931
Ctrl MO N-N	Non Clone- Non Clone	h6b4	14.157	254.416	13.047	3801.631	22.931
Ctrl MO N-N	Non Clone- Non Clone	h6b4	14.157	181.715	15.327	3590.286	22.931
Ctrl MO N-N	Non Clone- Non Clone	h6b4	14.157	107.025	3.161	1125.462	22.931
Ctrl MO N-N	Non Clone- Non Clone	h6b4	14.157	65.628	0.815	492.001	22.931
Ctrl MO N-N	Non Clone- Non Clone	h6b4	14.157	39.991	0	315.158	22.931
Ctrl MO N-N	Non Clone- Non Clone	h6b5	9.942	453.153	68.375	3479.716	16.066
Ctrl MO N-N	Non Clone- Non Clone	h6b5	9.942	394.084	47.179	3924.469	16.066
Ctrl MO N-N	Non Clone- Non Clone	h6b5	9.942	311.87	42.296	2497.136	16.066
Ctrl MO N-N	Non Clone- Non Clone	h6b5	9.942	241.237	27.195	1715.716	16.066
Ctrl MO N-N	Non Clone- Non Clone	h6b5	9.942	208.952	17.89	979.777	16.066
Ctrl MO N-N	Non Clone- Non Clone	h6b5	9.942	172.564	9.94	819.309	16.066
Ctrl MO N-N	Non Clone- Non Clone	h7b1	10.321	525.306	57.456	4093.661	16.693
Ctrl MO N-N	Non Clone- Non Clone	h7b1	10.321	383.524	29.142	1588.892	16.693
Ctrl MO N-N	Non Clone- Non Clone	h7b1	10.321	225.953	14.613	1199.178	16.693
Ctrl MO N-N	Non Clone- Non Clone	h7b1	10.321	118.496	13.49	487.279	16.693
Ctrl MO N-N	Non Clone- Non Clone	h7b1	10.321	76.765	4.991	328.206	16.693
Ctrl MO N-N	Non Clone- Non Clone	h7b2	11.401	585.257	41.382	2562.189	18.437
Ctrl MO N-N	Non Clone- Non Clone	h7b2	11.401	582.309	45.499	3764.05	18.437
Ctrl MO N-N	Non Clone- Non Clone	h7b2	11.401	478.184	27.469	4051.948	18.437
Ctrl MO N-N	Non Clone- Non Clone	h7b2	11.401	330.369	49.026	3519.556	18.437
Ctrl MO N-N	Non Clone- Non Clone	h7b2	11.401	219.494	4.37	1592.898	18.437
Ctrl MO N-N	Non Clone- Non Clone	h7b2	11.401	186.684	11.716	2053.234	18.437
Ctrl MO N-N	Non Clone- Non Clone	h7b3	7.727	715.674	125.532	3172.614	12.476
Ctrl MO N-N	Non Clone- Non Clone	h7b3	7.727	604.962	121.986	2593.006	12.476
Ctrl MO N-N	Non Clone- Non Clone	h7b3	7.727	437.67	74.125	1255.357	12.476
Ctrl MO N-N	Non Clone- Non Clone	h7b3	7.727	321.779	45.725	3534.239	12.476
Ctrl MO N-N	Non Clone- Non Clone	h7b3	7.727	226.103	13.669	3689.328	12.476
Ctrl MO N-N	Non Clone- Non Clone	h7b4	14.589	608.006	46.576	4095	23.634
Ctrl MO N-N	Non Clone- Non Clone	h7b4	14.589	600.805	41.515	3826.101	23.634
Ctrl MO N-N	Non Clone- Non Clone	h7b4	14.589	497.565	32.657	4094.111	23.634
Ctrl MO N-N	Non Clone- Non Clone	h7b4	14.589	361.742	6.046	4095	23.634
Ctrl MO N-N	Non Clone- Non Clone	h7b4	14.589	225.069	16.738	4095	23.634
Ctrl MO N-N	Non Clone- Non Clone	h7b4	14.589	168.602	16.281	2748.5	23.634
Ctrl MO N-N	Non Clone- Non Clone	h7b5	9.294	774.092	82.584	3861.534	15.024
Ctrl MO N-N	Non Clone- Non Clone	h7b5	9.294	700.108	90.735	4077.752	15.024
Ctrl MO N-N	Non Clone- Non Clone	h7b5	9.294	492.811	88.543	2888.427	15.024
Ctrl MO N-N	Non Clone- Non Clone	h7b5	9.294	261.251	30.334	1088.726	15.024
Ctrl MO N-N	Non Clone- Non Clone	h7b5	9.294	123.563	10.312	536.318	15.024
Ctrl MO N-N	Non Clone- Non Clone	h7b6	6.106	854.087	205.919	3724.002	9.84
Ctrl MO N-N	Non Clone- Non Clone	h7b6	6.106	583.921	84.79	3912.623	9.84
Ctrl MO N-N	Non Clone- Non Clone	h7b6	6.106	443.159	32.455	2560.989	9.84
Ctrl MO N-N	Non Clone- Non Clone	h7b6	6.106	292.605	45.642	1611.756	9.84
Ctrl MO N-N	Non Clone- Non Clone	h7b6	6.106	230.01	34.101	1941.887	9.84
Ctrl MO N-N	Non Clone- Non Clone	h7b7	10.158	574.773	29.913	4094.376	16.43
Ctrl MO N-N	Non Clone- Non Clone	h7b7	10.158	495.188	54.134	3687.807	16.43
Ctrl MO N-N	Non Clone- Non Clone	h7b7	10.158	338.989	54.587	2125.34	16.43
Ctrl MO N-N	Non Clone- Non Clone	h7b7	10.158	168.101	17.602	640.127	16.43
Ctrl MO N-N	Non Clone- Non Clone	h7b7	10.158	111.149	4.003	567.868	16.43
Ctrl MO N-N	Non Clone- Non Clone	h7b8	9.672	511.585	22.314	4095	15.639
Ctrl MO N-N	Non Clone- Non Clone	h7b8	9.672	405.224	10.621	3985.849	15.639
Ctrl MO N-N	Non Clone- Non Clone	h7b8	8.375	496.373	56.681	4001.966	13.53
Ctrl MO N-N	Non Clone- Non Clone	h7b8	8.375	365.41	13.526	2328.064	13.53
Ctrl MO N-N	Non Clone- Non Clone	h7b8	8.375	236.608	1.89	889.487	13.53
Ctrl MO N-N	Non Clone- Non Clone	h7b8	8.375	113.879	8.124	427.961	13.53
Ecad MO C-C	Clone-Clone	h2b1	7.457	200.271	28.312	865.52	12.037
Ecad MO C-C	Clone-Clone	h2b1	7.457	143.091	13.016	592.792	12.037
Ecad MO C-C	Clone-Clone	h2b1	7.457	126.883	15.676	811.88	12.037
Ecad MO C-C	Clone-Clone	h2b1	7.457	119.265	0.982	657.048	12.037
Ecad MO C-C	Clone-Clone	h2b1	7.457	116.445	4.056	430.36	12.037
Ecad MO C-C	Clone-Clone	h2b2	9.294	350.494	15.39	4095	15.023
Ecad MO C-C	Clone-Clone	h2b2	9.294	221.343	7.383	1597.014	15.023
Ecad MO C-C	Clone-Clone	h2b2	9.294	146.722	6.425	489.407	15.023
Ecad MO C-C	Clone-Clone	h2b2	9.294	150.497	9.671	740.188	15.023
Ecad MO C-C	Clone-Clone	h2b2	9.294	148.322	15.432	1200.179	15.023
Ecad MO C-C	Clone-Clone	h2b2	9.294	143.23	6.015	1154.794	15.023
Ecad MO C-C	Clone-Clone	h2b3	9.942	328.127	26.438	2479.476	16.078
Ecad MO C-C	Clone-Clone	h2b3	9.942	302.853	33.184	2065.024	16.078
Ecad MO C-C	Clone-Clone	h2b3	9.942	286.076	34.666	1928.547	16.078
Ecad MO C-C	Clone-Clone	h2b3	9.942	316.974	20.25	1893.49	16.078
Ecad MO C-C	Clone-Clone	h2b3	9.942	294.29	15.996	1481.804	16.078
Ecad MO C-C	Clone-Clone	h2b4	10.969	340.957	36.406	3522.113	17.747
Ecad MO C-C	Clone-Clone	h2b4	7.295	238.537	42.931	917.607	11.773
Ecad MO C-C	Clone-Clone	h2b4	7.295	203.263	9.881	832.722	11.773
Ecad MO C-C	Clone-Clone	h2b4	7.295	149.157	8.866	550.674	11.773
Ecad MO C-C	Clone-Clone	h2b4	7.295	147.606	1.615	823.453	11.773
Ecad MO C-C	Clone-Clone	h2b4	6.106	91.195	4.441	516.288	9.84
Ecad MO C-C	Clone-Clone	h2b4	6.106	85.01	2.138	616.922	9.84
Ecad MO C-C	Clone-Clone	h2b5	3.944	359.037	78.666	1251.469	6.326
Ecad MO C-C	Clone-Clone	h2b5	3.944	402.927	74.523	2427.222	6.326
Ecad MO C-C	Clone-Clone	h2b5	3.944	320.7	54.547	1313.731	6.326
Ecad MO C-C	Clone-Clone	h2b5	3.944	263.986	6.088	1239.143	6.326
Ecad MO C-C	Clone-Clone	h2b5	3.944	187.266	11.61	1256.746	6.326
Ecad MO C-C	Clone-Clone	h3b1	8.808	239.685	25.42	1270.033	14.232
Ecad MO C-C	Clone-Clone	h3b1	8.808	217.329	30.816	1840.819	14.232
Ecad MO C-C	Clone-Clone	h3b1	8.808	156.255	17.432	590.326	14.232
Ecad MO C-C	Clone-Clone	h3b1	8.808	134.658	7.714	416.696	14.232
Ecad MO C-C	Clone-Clone	h3b1	8.808	139.991	7.903	532.097	14.232
Ecad MO C-C	Clone-Clone	h3b2	8.754	341.746	80.515	1361.359	14.145
Ecad MO C-C	Clone-Clone	h3b2	8.754	351.356	44.023	1536.403	14.145
Ecad MO C-C	Clone-Clone	h3b2	8.754	326.306	50.873	2630.422	14.145
Ecad MO C-C	Clone-Clone	h3b2	8.754	281.919	37.309	3189.223	14.145
Ecad MO C-C	Clone-Clone	h3b2	8.754	199.221	32.34	1055.984	14.145
Ecad MO C-C	Clone-Clone	h3b3	7.511	318.788	62.569	2038.323	12.123
Ecad MO C-C	Clone-Clone	h3b3	7.511	316.459	68.905	1254.138	12.123
Ecad MO C-C	Clone-Clone	h3b3	7.511	284.014	47.564	1827.953	12.123
Ecad MO C-C	Clone-Clone	h3b3	7.511	242.178	24.148	1381.148	12.123
Ecad MO C-C	Clone-Clone	h3b3	8.267	258.744	23.659	782.89	13.354
Ecad MO C-C	Clone-Clone	h3b3	8.267	180.235	35.611	653.381	13.354
Ecad MO C-C	Clone-Clone	h3b3	8.267	135.857	18.542	978.332	13.354
Ecad MO C-C	Clone-Clone	h3b4	5.295	387.814	44.472	3934.079	8.522
Ecad MO C-C	Clone-Clone	h3b4	5.295	278.892	38.743	1235.084	8.522
Ecad MO C-C	Clone-Clone	h3b4	5.295	234.579	22.634	933.923	8.522
Ecad MO C-C	Clone-Clone	h3b4	5.295	190.109	20.62	1459.345	8.522
Ecad MO C-C	Clone-Clone	h4b1	16.534	259.672	27.604	1903.055	26.797
Ecad MO C-C	Clone-Clone	h4b1	16.534	235.85	13.411	1089.445	26.797
Ecad MO C-C	Clone-Clone	h4b1	16.534	198.821	24.4	1938.109	26.797
Ecad MO C-C	Clone-Clone	h4b1	16.534	161.702	13.471	1666.815	26.797
Ecad MO C-C	Clone-Clone	h4b1	16.534	119.234	0.509	573.827	26.797
Ecad MO C-C	Clone-Clone	h4b1	16.534	108.597	0.799	569.422	26.797
Ecad MO C-C	Clone-Clone	h4b1	16.534	102.528	0	1007.806	26.797
Ecad MO C-C	Clone-Clone	h4b2	3.674	278.755	57.548	1311.805	5.887
Ecad MO C-C	Clone-Clone	h4b2	3.674	315.866	59.165	1367.673	5.887
Ecad MO C-C	Clone-Clone	h4b2	3.674	207.884	48.805	656.943	5.887
Ecad MO C-C	Clone-Clone	h4b2	3.674	172.544	35.766	420.359	5.887
Ecad MO C-C	Clone-Clone	h4b2	5.998	183.271	24.601	668.516	9.664
Ecad MO C-C	Clone-Clone	h4b2	5.998	148.281	13.569	567.14	9.664
Ecad MO C-C	Clone-Clone	h4b2	5.998	143.195	15.218	1208.189	9.664
Ecad MO C-C	Clone-Clone	h4b2	5.998	129.968	4.666	1715.159	9.664
Ecad MO C-C	Clone-Clone	h4b2	5.998	99.756	7.302	609.826	9.664
Ecad MO C-C	Clone-Clone	h4b2	5.998	71.501	2.47	238.732	9.664
Ecad MO C-C	Clone-Clone	h4b3	7.133	218.285	30.811	1045.494	11.509
Ecad MO C-C	Clone-Clone	h4b3	7.133	185.303	8.456	1097.677	11.509
Ecad MO C-C	Clone-Clone	h4b3	7.133	175.529	3.664	1089.149	11.509
Ecad MO C-C	Clone-Clone	h4b3	7.133	172.378	5.112	1024.035	11.509
Ecad MO C-C	Clone-Clone	h4b3	7.133	157.62	13.432	944.08	11.509
Ecad MO C-C	Clone-Clone	h4b3	7.133	137.4	3.868	798.495	11.509
Ecad MO C-C	Clone-Clone	h4b3	7.133	97.577	9.018	360.938	11.509
Ecad MO C-C	Clone-Clone	h4b3	7.133	95.037	1.558	366.589	11.509
Ecad MO C-C	Clone-Clone	h4b4	9.942	187.751	14.753	765.175	16.078
Ecad MO C-C	Clone-Clone	h4b4	9.942	177.857	22.645	1890.129	16.078
Ecad MO C-C	Clone-Clone	h4b4	9.942	160.206	3.161	2305.693	16.078
Ecad MO C-C	Clone-Clone	h4b4	9.942	114.858	3.264	1124.556	16.078
Ecad MO C-C	Clone-Clone	h4b4	9.942	86.347	2.087	530.632	16.078
Ecad MO C-C	Clone-Clone	h4b4	9.942	84.398	1.231	479.345	16.078
Ecad MO C-C	Clone-Clone	h4b5	9.888	292.917	49.974	1543.014	15.989
Ecad MO C-C	Clone-Clone	h4b5	9.888	260.196	34.266	1235.188	15.989
Ecad MO C-C	Clone-Clone	h4b5	9.888	197.061	26.113	1123.79	15.989
Ecad MO C-C	Clone-Clone	h4b5	9.888	237.009	10.151	4095	15.989
Ecad MO C-C	Clone-Clone	h4b5	9.888	252.382	7.756	4095	15.989
Ecad MO C-C	Clone-Clone	h4b5	9.888	249.595	7.951	4095	15.989
Ecad MO C-C	Clone-Clone	h5b1	8.213	475.356	63.897	4095	13.267
Ecad MO C-C	Clone-Clone	h5b1	8.213	347.651	28.65	2285.895	13.267
Ecad MO C-C	Clone-Clone	h5b1	8.213	222.121	17.242	832.91	13.267
Ecad MO C-C	Clone-Clone	h5b1	8.213	140.686	10.31	2581.464	13.267
Ecad MO C-C	Clone-Clone	h5b1	8.213	105.354	2.108	2622.118	13.267
Ecad MO C-C	Clone-Clone	h5b2	8.862	324.485	29.828	1136.6	14.321
Ecad MO C-C	Clone-Clone	h5b2	8.862	293.668	35.319	1679.917	14.321
Ecad MO C-C	Clone-Clone	h5b2	8.862	198.452	15.083	1189.618	14.321
Ecad MO C-C	Clone-Clone	h5b2	8.862	142.299	5.751	1009.402	14.321
Ecad MO C-C	Clone-Clone	h5b3	4.161	366.298	56.954	2209.911	6.677
Ecad MO C-C	Clone-Clone	h5b3	4.161	363.12	53.839	2608.411	6.677
Ecad MO C-C	Clone-Clone	h5b3	4.161	295.686	61.293	916.214	6.677
Ecad MO C-C	Clone-Clone	h5b3	4.161	228.534	36.707	874.879	6.677
Ecad MO C-C	Clone-Clone	h5b3	10.483	226.471	16.985	1166.809	16.957
Ecad MO C-C	Clone-Clone	h5b3	10.483	197.342	2.06	979.736	16.957
Ecad MO C-C	Clone-Clone	h5b3	10.483	186.459	13.214	1069.952	16.957
Ecad MO C-C	Clone-Clone	h5b3	10.483	177.094	14.516	1129.905	16.957
Ecad MO C-C	Clone-Clone	h5b3	10.483	162.299	3.576	808.634	16.957
Ecad MO C-C	Clone-Clone	h5b4	13.184	333.63	32.691	1792.5	21.349
Ecad MO C-C	Clone-Clone	h5b4	13.184	309.21	24.503	1991.727	21.349
Ecad MO C-C	Clone-Clone	h5b4	13.184	269.153	12.032	1878.99	21.349
Ecad MO C-C	Clone-Clone	h5b4	13.184	221.359	21.283	1939.509	21.349
Ecad MO C-C	Clone-Clone	h5b4	13.184	173.377	2.106	955.314	21.349
Ecad MO C-C	Clone-Clone	h6b1	13.779	285.533	35.598	1362.215	22.316
Ecad MO C-C	Clone-Clone	h6b1	13.779	227.852	25.534	1307.122	22.316
Ecad MO C-C	Clone-Clone	h6b1	13.779	154.268	6.471	1271.413	22.316
Ecad MO C-C	Clone-Clone	h6b1	13.779	132.257	2.458	621.23	22.316
Ecad MO C-C	Clone-Clone	h6b1	13.779	128.937	1.475	1096.636	22.316
Ecad MO C-C	Clone-Clone	h6b2	9.348	304.54	23.193	2034.847	15.112
Ecad MO C-C	Clone-Clone	h6b2	9.348	270.214	25.278	1338.041	15.112
Ecad MO C-C	Clone-Clone	h6b2	9.348	240.053	5.283	2171.62	15.112
Ecad MO C-C	Clone-Clone	h6b2	9.348	167.564	17.322	826.721	15.112
Ecad MO C-C	Clone-Clone	h6b2	9.348	128.827	13.06	1262.659	15.112
Ecad MO C-C	Clone-Clone	h6b2	9.348	116.745	4.039	568.101	15.112
Ecad MO C-C	Clone-Clone	h6b2	9.348	104.981	2.214	927.978	15.112
Ecad MO C-C	Clone-Clone	h7b1	6.106	330.439	47.491	1902.563	9.84
Ecad MO C-C	Clone-Clone	h7b1	6.106	307.166	42.36	1250.75	9.84
Ecad MO C-C	Clone-Clone	h7b1	6.106	239.159	23.893	1057.822	9.84
Ecad MO C-C	Clone-Clone	h7b1	6.106	156.252	11.368	494.462	9.84
Ecad MO C-C	Clone-Clone	h7b2	10.158	270.898	33.609	917.19	16.43
Ecad MO C-C	Clone-Clone	h7b2	10.158	244.493	44.56	1776.829	16.43
Ecad MO C-C	Clone-Clone	h7b2	10.158	170.702	26.579	2641.122	16.43
Ecad MO C-C	Clone-Clone	h7b2	10.158	94.355	5.076	726.487	16.43
Ecad MO C-C	Clone-Clone	h7b3	12.536	300.841	8.146	1395.5	20.295
Ecad MO C-C	Clone-Clone	h7b3	13.292	270.405	32.3	1262.585	21.525
Ecad MO C-C	Clone-Clone	h7b3	13.292	199.893	18.075	604.405	21.525
Ecad MO C-C	Clone-Clone	h7b3	13.292	135.62	4.434	696.836	21.525
Ecad MO C-C	Clone-Clone	h7b3	13.292	130.919	2.586	1617.569	21.525
Ecad MO C-C	Clone-Clone	h7b4	12.806	257.056	26.772	2814.091	20.735
Ecad MO C-C	Clone-Clone	h7b4	12.806	199.115	1.526	2035.312	20.735
Ecad MO C-C	Clone-Clone	h7b4	12.806	115.761	2.301	1269.419	20.735
Ecad MO C-C	Clone-Clone	h7b4	12.806	89.984	2.832	575.294	20.735
Ecad MO C-C	Clone-Clone	h7b5	8.321	238.832	21.585	1216.516	13.442
Ecad MO C-C	Clone-Clone	h7b5	8.321	173.465	6.617	1432.464	13.442
Ecad MO C-C	Clone-Clone	h7b5	8.321	86.471	1.194	444.666	13.442
Ecad MO C-C	Clone-Clone	h7b5	8.321	70.235	3.429	396.907	13.442
Ecad MO C-C	Clone-Clone	h7b5	8.321	55.02	0.902	463.55	13.442
Ecad MO C-C	Clone-Clone	h7b6	7.457	302.458	54.307	1919.274	12.037
Ecad MO C-C	Clone-Clone	h7b6	7.457	299.939	35.377	1769.673	12.037
Ecad MO C-C	Clone-Clone	h7b6	7.457	304.505	16.981	1487.021	12.037
Ecad MO C-C	Clone-Clone	h7b6	7.457	331.447	51.425	2273.287	12.037
Ecad MO C-C	Clone-Clone	h7b6	7.457	273.205	22.547	2140.423	12.037
Ecad MO C-C	Clone-Clone	h7b6	7.457	126.061	5.428	505.847	12.037
Ecad MO C-C	Clone-Clone	h7b7	9.888	282.867	26.844	1413.412	15.99
Ecad MO C-C	Clone-Clone	h7b7	9.888	272.294	27.541	1213.097	15.99
Ecad MO C-C	Clone-Clone	h7b7	9.888	259.369	44.328	1309.819	15.99
Ecad MO C-C	Clone-Clone	h7b7	9.888	225.646	20.218	1203.633	15.99
Ecad MO C-C	Clone-Clone	h7b7	9.888	191.315	9.435	1583.819	15.99
Ecad MO C-C	Clone-Clone	h7b8	8.7	176.981	7.638	929.551	14.057
Ecad MO C-C	Clone-Clone	h7b8	8.7	141.006	2.021	616.916	14.057
Ecad MO C-C	Clone-Clone	h7b8	8.7	112.977	2.085	1059.576	14.057
Ecad MO C-C	Clone-Clone	h7b8	8.7	73.988	1.803	668.017	14.057
Ecad MO C-C	Clone-Clone	h7b8	8.7	61.544	1.632	521.897	14.057
Ecad MO C-C	Clone-Clone	h8b1	5.133	131.721	18.765	491.561	8.259
Ecad MO C-C	Clone-Clone	h8b1	5.133	150.424	22.501	480.953	8.259
Ecad MO C-C	Clone-Clone	h8b1	5.133	162.302	15.997	996.185	8.259
Ecad MO C-C	Clone-Clone	h8b1	5.133	154.783	11.483	752.379	8.259
Ecad MO C-C	Clone-Clone	h8b2	7.673	104.884	13.081	354.638	12.388
Ecad MO C-C	Clone-Clone	h8b2	7.673	140.991	13.75	402.699	12.388
Ecad MO C-C	Clone-Clone	h8b2	7.673	152.087	12.054	458.11	12.388
Ecad MO C-C	Clone-Clone	h8b2	8.429	191.771	8.03	557.147	13.617
Ecad MO C-C	Clone-Clone	h8b2	8.429	186.459	9.239	605.834	13.617
Ecad MO C-C	Clone-Clone	h8b2	8.429	165.268	11.703	567.147	13.617
Ecad MO C-C	Clone-Clone	h8b2	8.429	150.287	18.755	633.193	13.617
Ecad MO C-C	Clone-Clone	h8b2	8.429	131.342	3.982	407.619	13.617
Ecad MO C-C	Clone-Clone	h8b3	10.915	114.138	2.045	483.245	17.66
Ecad MO C-C	Clone-Clone	h8b3	10.915	132.966	13.397	422.127	17.66
Ecad MO C-C	Clone-Clone	h8b3	10.915	155.14	19.966	426.415	17.66
Ecad MO C-C	Clone-Clone	h8b3	10.915	168.778	25.277	472.194	17.66
Ecad MO C-C	Clone-Clone	h8b3	10.915	171.697	12.163	1007.069	17.66
Ecad MO C-C	Clone-Clone	h8b3	10.915	166.535	13.093	1095.983	17.66
Ecad MO C-C	Clone-Clone	h8b3	17.021	168.766	11.046	917.377	27.587
Ecad MO C-C	Clone-Clone	h8b3	17.021	155.216	0.868	733.837	27.587
Ecad MO C-C	Clone-Clone	h8b4	11.077	128.148	4.263	1763.658	17.923
Ecad MO C-C	Clone-Clone	h8b4	11.077	144.468	6.58	1498.247	17.923
Ecad MO C-C	Clone-Clone	h8b4	11.077	170.152	8.555	1651.878	17.923
Ecad MO C-C	Clone-Clone	h8b4	11.077	199.991	14.62	3543.705	17.923
Ecad MO C-C	Clone-Clone	h8b4	11.077	177.527	14.488	1860.506	17.923
Ecad MO C-C	Clone-Clone	h8b5	7.295	100.094	4.672	375.941	11.773
Ecad MO C-C	Clone-Clone	h8b5	7.295	125.31	5.247	751.277	11.773
Ecad MO C-C	Clone-Clone	h8b5	7.295	128.34	7.456	753.162	11.773
Ecad MO C-C	Clone-Clone	h8b5	7.295	115.127	7.112	601.354	11.773
Ecad MO C-C	Clone-Clone	h8b5	7.295	110.966	2.029	415.485	11.773
Ecad MO C-C	Clone-Clone	h8b5	7.295	109.73	4.294	405.737	11.773
Ecad MO C-C	Clone-Clone	h8b5	7.295	125.299	0.339	762.367	11.773
Ecad MO C-C	Clone-Clone	h8b6	7.565	83.724	0.115	310.758	12.212
Ecad MO C-C	Clone-Clone	h8b6	7.565	100.851	0.011	303.927	12.212
Ecad MO C-C	Clone-Clone	h8b6	7.565	99.949	2.494	316.286	12.212
Ecad MO C-C	Clone-Clone	h8b6	7.565	109.531	8.033	326.844	12.212
Ecad MO C-C	Clone-Clone	h8b6	7.565	132.777	8.058	508.427	12.212
Ecad MO C-C	Clone-Clone	h8b6	7.565	162.856	17.873	771.864	12.212
Ecad MO N-C	Non Clone- Clone	h2b1	5.944	347.502	28.817	2693.002	9.577
Ecad MO N-C	Non Clone- Clone	h2b1	5.944	285.965	35.481	2814.965	9.577
Ecad MO N-C	Non Clone- Clone	h2b1	5.944	180.03	5.683	1129.557	9.577
Ecad MO N-C	Non Clone- Clone	h2b1	5.944	149.304	14.99	809.683	9.577
Ecad MO N-C	Non Clone- Clone	h2b1	5.944	148.971	14.88	1789.507	9.577
Ecad MO N-C	Non Clone- Clone	h2b10	7.403	350.421	39.715	1463.081	11.949
Ecad MO N-C	Non Clone- Clone	h2b10	7.403	314.785	44.739	1183.14	11.949
Ecad MO N-C	Non Clone- Clone	h2b10	7.403	246.14	9.691	855.13	11.949
Ecad MO N-C	Non Clone- Clone	h2b10	7.403	144.917	13.78	697.051	11.949
Ecad MO N-C	Non Clone- Clone	h2b10	7.403	78.65	3.559	554.031	11.949
Ecad MO N-C	Non Clone- Clone	h2b10	7.403	61.956	0.664	1097.311	11.949
Ecad MO N-C	Non Clone- Clone	h2b2	8.051	466.529	105.426	1982.569	13.003
Ecad MO N-C	Non Clone- Clone	h2b2	8.051	374.071	34.619	2389.421	13.003
Ecad MO N-C	Non Clone- Clone	h2b2	8.051	330.445	31.024	2449.563	13.003
Ecad MO N-C	Non Clone- Clone	h2b2	8.051	278.989	23.885	3163.903	13.003
Ecad MO N-C	Non Clone- Clone	h2b2	8.051	187.015	5.766	1568.41	13.003
Ecad MO N-C	Non Clone- Clone	h2b3	5.457	283.48	31.293	802.021	8.786
Ecad MO N-C	Non Clone- Clone	h2b3	5.457	171.45	29.949	580.295	8.786
Ecad MO N-C	Non Clone- Clone	h2b3	5.457	172.72	26.048	859.453	8.786
Ecad MO N-C	Non Clone- Clone	h2b3	5.457	190.583	14.535	1616.499	8.786
Ecad MO N-C	Non Clone- Clone	h2b4	8.97	166.14	16.787	1319.252	14.497
Ecad MO N-C	Non Clone- Clone	h2b4	8.97	108.23	8.959	434.484	14.497
Ecad MO N-C	Non Clone- Clone	h2b4	8.97	91.898	8.107	599.363	14.497
Ecad MO N-C	Non Clone- Clone	h2b4	8.97	111.297	4.958	1246.854	14.497
Ecad MO N-C	Non Clone- Clone	h2b4	8.97	128.804	6.062	2022.823	14.497
Ecad MO N-C	Non Clone- Clone	h2b5	11.401	192.787	1.401	3252.255	18.45
Ecad MO N-C	Non Clone- Clone	h2b5	11.401	183.658	1.339	1823.115	18.45
Ecad MO N-C	Non Clone- Clone	h2b5	11.401	154.381	4.045	1119.623	18.45
Ecad MO N-C	Non Clone- Clone	h2b5	11.401	126.62	2.766	740.441	18.45
Ecad MO N-C	Non Clone- Clone	h2b5	11.401	96.651	1.732	470.161	18.45
Ecad MO N-C	Non Clone- Clone	h2b5	11.401	84.125	0.164	380.305	18.45
Ecad MO N-C	Non Clone- Clone	h2b6	13.725	406.066	30.78	2207.925	22.228
Ecad MO N-C	Non Clone- Clone	h2b6	13.725	373.026	28.109	2902.292	22.228
Ecad MO N-C	Non Clone- Clone	h2b6	13.725	285.1	8.965	2741.58	22.228
Ecad MO N-C	Non Clone- Clone	h2b6	13.725	200.358	1.583	1537.798	22.228
Ecad MO N-C	Non Clone- Clone	h2b6	13.725	151.15	1.112	1010.157	22.228
Ecad MO N-C	Non Clone- Clone	h2b6	13.725	125.183	1.994	776.275	22.228
Ecad MO N-C	Non Clone- Clone	h2b7	10.699	528.696	61.554	4094.486	17.303
Ecad MO N-C	Non Clone- Clone	h2b7	10.699	454.096	37.819	3822.79	17.303
Ecad MO N-C	Non Clone- Clone	h2b7	10.699	362.278	37.493	3903.68	17.303
Ecad MO N-C	Non Clone- Clone	h2b7	10.699	336.116	40.068	4095	17.303
Ecad MO N-C	Non Clone- Clone	h2b7	10.699	270.006	20.079	2174.319	17.303
Ecad MO N-C	Non Clone- Clone	h2b8	8.7	375.311	21.285	1624.696	14.057
Ecad MO N-C	Non Clone- Clone	h2b8	8.7	265.632	8.341	1069.928	14.057
Ecad MO N-C	Non Clone- Clone	h2b8	8.7	208.505	22.851	882.808	14.057
Ecad MO N-C	Non Clone- Clone	h2b8	10.266	248.628	16.787	1295.382	16.605
Ecad MO N-C	Non Clone- Clone	h2b8	10.266	211.374	5.413	1320.489	16.605
Ecad MO N-C	Non Clone- Clone	h2b8	10.266	175.53	1.624	3529.012	16.605
Ecad MO N-C	Non Clone- Clone	h2b8	10.266	138.574	0.93	3324.289	16.605
Ecad MO N-C	Non Clone- Clone	h2b9	13.184	399.926	14.362	3761.347	21.349
Ecad MO N-C	Non Clone- Clone	h2b9	13.184	364.303	28.285	2569.864	21.349
Ecad MO N-C	Non Clone- Clone	h2b9	13.076	297.258	32.759	1580.603	21.173
Ecad MO N-C	Non Clone- Clone	h2b9	13.076	217.167	26.014	1117.419	21.173
Ecad MO N-C	Non Clone- Clone	h2b9	13.076	128.933	7.681	479.12	21.173
Ecad MO N-C	Non Clone- Clone	h2b9	13.076	98.2	1.641	613.222	21.173
Ecad MO N-C	Non Clone- Clone	h3b1	10.753	336.372	44.618	2498.416	17.396
Ecad MO N-C	Non Clone- Clone	h3b1	10.753	329.874	30.697	2857.553	17.396
Ecad MO N-C	Non Clone- Clone	h3b1	10.753	232.104	9.304	2220.085	17.396
Ecad MO N-C	Non Clone- Clone	h3b1	10.753	141.885	5.719	1033.353	17.396
Ecad MO N-C	Non Clone- Clone	h3b10	10.212	472.063	70.356	3974.466	16.517
Ecad MO N-C	Non Clone- Clone	h3b10	10.212	298.271	14.961	3624.579	16.517
Ecad MO N-C	Non Clone- Clone	h3b10	10.212	141.097	6.527	1047.84	16.517
Ecad MO N-C	Non Clone- Clone	h3b10	10.212	100.127	5.202	501.407	16.517
Ecad MO N-C	Non Clone- Clone	h3b10	10.212	85.931	1.374	738.82	16.517
Ecad MO N-C	Non Clone- Clone	h3b10	10.212	75.203	0.015	850.041	16.517
Ecad MO N-C	Non Clone- Clone	h3b2	6.754	393.684	62.276	1528.338	10.888
Ecad MO N-C	Non Clone- Clone	h3b2	6.754	370.475	53.421	1102.757	10.888
Ecad MO N-C	Non Clone- Clone	h3b2	6.754	301.852	56.341	773.695	10.888
Ecad MO N-C	Non Clone- Clone	h3b2	6.754	171.705	2.935	492.61	10.888
Ecad MO N-C	Non Clone- Clone	h3b2	6.754	126.215	3.92	740.952	10.888
Ecad MO N-C	Non Clone- Clone	h3b3	5.457	334.774	82.527	800.981	8.786
Ecad MO N-C	Non Clone- Clone	h3b3	5.457	327.391	64.707	945.112	8.786
Ecad MO N-C	Non Clone- Clone	h3b3	5.457	298.188	51.61	891.64	8.786
Ecad MO N-C	Non Clone- Clone	h3b3	5.457	234.825	36.142	711.891	8.786
Ecad MO N-C	Non Clone- Clone	h3b3	5.457	214.931	42.306	1385.598	8.786
Ecad MO N-C	Non Clone- Clone	h3b4	4.485	689.697	210.105	2675.926	7.204
Ecad MO N-C	Non Clone- Clone	h3b4	4.485	597.672	193.616	1671.748	7.204
Ecad MO N-C	Non Clone- Clone	h3b4	4.485	513.67	109.152	2553.443	7.204
Ecad MO N-C	Non Clone- Clone	h3b4	4.485	389.398	43.213	4074.508	7.204
Ecad MO N-C	Non Clone- Clone	h3b4	4.485	284.029	69.549	2735.627	7.204
Ecad MO N-C	Non Clone- Clone	h3b4	4.485	238.557	33.683	1173.715	7.204
Ecad MO N-C	Non Clone- Clone	h3b5	5.349	629.084	108.969	4095	8.61
Ecad MO N-C	Non Clone- Clone	h3b5	5.349	467.068	47.653	3769.801	8.61
Ecad MO N-C	Non Clone- Clone	h3b5	5.349	228.326	37.175	797.47	8.61
Ecad MO N-C	Non Clone- Clone	h3b5	5.349	160.975	22.625	633.955	8.61
Ecad MO N-C	Non Clone- Clone	h3b5	5.349	114.255	12.871	468.225	8.61
Ecad MO N-C	Non Clone- Clone	h3b6	5.295	531.938	56.897	4021.625	8.522
Ecad MO N-C	Non Clone- Clone	h3b6	5.295	457.647	86.33	2095.609	8.522
Ecad MO N-C	Non Clone- Clone	h3b6	5.295	325.485	82.159	924.716	8.522
Ecad MO N-C	Non Clone- Clone	h3b6	5.295	223.354	48.895	630.669	8.522
Ecad MO N-C	Non Clone- Clone	h3b6	5.295	146.526	28.812	441.806	8.522
Ecad MO N-C	Non Clone- Clone	h3b6	5.295	122.626	16.436	316.51	8.522
Ecad MO N-C	Non Clone- Clone	h3b6	5.295	104.948	12.199	341.288	8.522
Ecad MO N-C	Non Clone- Clone	h3b7	5.89	410.225	66.244	1293.432	9.489
Ecad MO N-C	Non Clone- Clone	h3b7	5.89	459.489	44.906	2216.236	9.489
Ecad MO N-C	Non Clone- Clone	h3b7	5.89	421.032	43.533	1849.759	9.489
Ecad MO N-C	Non Clone- Clone	h3b7	5.89	345.024	43.328	3586.744	9.489
Ecad MO N-C	Non Clone- Clone	h3b7	5.89	247.017	31.387	3120.198	9.489
Ecad MO N-C	Non Clone- Clone	h3b8	4.863	319.909	73.256	841.115	7.819
Ecad MO N-C	Non Clone- Clone	h3b8	4.863	282.429	47.68	1201.758	7.819
Ecad MO N-C	Non Clone- Clone	h3b8	4.863	253.144	50.672	1230.291	7.819
Ecad MO N-C	Non Clone- Clone	h3b8	4.863	240.223	48.033	1098.012	7.819
Ecad MO N-C	Non Clone- Clone	h3b8	4.863	247.672	38.152	1505.339	7.819
Ecad MO N-C	Non Clone- Clone	h3b8	4.863	222.853	28.075	904.541	7.819
Ecad MO N-C	Non Clone- Clone	h3b8	4.863	171.335	18.101	500.601	7.819
Ecad MO N-C	Non Clone- Clone	h3b9	13.833	296.193	61.516	2283.547	22.404
Ecad MO N-C	Non Clone- Clone	h3b9	13.833	264.62	36.442	1397.615	22.404
Ecad MO N-C	Non Clone- Clone	h3b9	13.833	238.713	17.307	1056.815	22.404
Ecad MO N-C	Non Clone- Clone	h3b9	13.833	239.592	18.413	1997.302	22.404
Ecad MO N-C	Non Clone- Clone	h3b9	13.833	195.39	11.841	981.23	22.404
Ecad MO N-C	Non Clone- Clone	h3b9	13.833	156.106	12.697	617.384	22.404
Ecad MO N-C	Non Clone- Clone	h4b1	14.103	266.327	16.404	1464.654	22.837
Ecad MO N-C	Non Clone- Clone	h4b1	14.103	227.752	5.184	1178.856	22.837
Ecad MO N-C	Non Clone- Clone	h4b1	14.103	195.717	3.571	1659.933	22.837
Ecad MO N-C	Non Clone- Clone	h4b1	14.103	148.483	0.257	2046.976	22.837
Ecad MO N-C	Non Clone- Clone	h4b1	14.103	102.525	0	702.109	22.837
Ecad MO N-C	Non Clone- Clone	h4b1	14.103	102.494	0.015	1098.897	22.837
Ecad MO N-C	Non Clone- Clone	h4b2	6.538	441.892	47.84	1699.981	10.543
Ecad MO N-C	Non Clone- Clone	h4b2	6.538	422.631	38.584	1811.657	10.543
Ecad MO N-C	Non Clone- Clone	h4b2	6.538	280.046	32.781	2340.256	10.543
Ecad MO N-C	Non Clone- Clone	h4b2	6.538	207.323	34.184	1424.717	10.543
Ecad MO N-C	Non Clone- Clone	h4b2	6.538	150.961	10.916	536.46	10.543
Ecad MO N-C	Non Clone- Clone	h4b3	10.537	248.191	34.081	1539.721	17.045
Ecad MO N-C	Non Clone- Clone	h4b3	10.537	226.105	11.739	1895.598	17.045
Ecad MO N-C	Non Clone- Clone	h4b3	10.537	184.02	24.995	1098.518	17.045
Ecad MO N-C	Non Clone- Clone	h4b3	10.537	133.311	8.603	1578.395	17.045
Ecad MO N-C	Non Clone- Clone	h4b3	10.537	110.111	1.366	1625.202	17.045
Ecad MO N-C	Non Clone- Clone	h4b3	10.537	88.584	5.169	644.994	17.045
Ecad MO N-C	Non Clone- Clone	h4b4	9.294	261.727	19.897	940.133	15.024
Ecad MO N-C	Non Clone- Clone	h4b4	9.294	258.802	20.01	876.401	15.024
Ecad MO N-C	Non Clone- Clone	h4b4	9.294	243.646	15.694	1150.345	15.024
Ecad MO N-C	Non Clone- Clone	h4b4	9.294	221.728	18.841	877.542	15.024
Ecad MO N-C	Non Clone- Clone	h4b4	9.294	174.632	12.945	1902.906	15.024
Ecad MO N-C	Non Clone- Clone	h4b4	6.754	159.963	5.462	1086.445	10.894
Ecad MO N-C	Non Clone- Clone	h4b4	6.754	125.03	1.39	714.097	10.894
Ecad MO N-C	Non Clone- Clone	h4b4	6.754	116.239	0.179	2249.83	10.894
Ecad MO N-C	Non Clone- Clone	h4b4	6.754	138.965	0.046	4095	10.894
Ecad MO N-C	Non Clone- Clone	h4b5	13.509	228.21	18.041	1589.011	21.876
Ecad MO N-C	Non Clone- Clone	h4b5	13.509	236.119	12.707	1125.729	21.876
Ecad MO N-C	Non Clone- Clone	h4b5	13.509	229.76	11.067	1920.748	21.876
Ecad MO N-C	Non Clone- Clone	h4b5	13.509	203.946	4.682	1646.612	21.876
Ecad MO N-C	Non Clone- Clone	h4b5	14.427	228.12	21.544	1989.425	23.37
Ecad MO N-C	Non Clone- Clone	h4b5	14.427	204.403	8.08	1186.688	23.37
Ecad MO N-C	Non Clone- Clone	h4b5	14.427	171.796	5.027	797.97	23.37
Ecad MO N-C	Non Clone- Clone	h4b5	14.427	150.329	8.589	2197.641	23.37
Ecad MO N-C	Non Clone- Clone	h4b5	14.427	132.409	0.066	4095	23.37
Ecad MO N-C	Non Clone- Clone	h4b6	7.943	328.367	41.687	3539.796	12.827
Ecad MO N-C	Non Clone- Clone	h4b6	7.943	259.901	23.275	2518.72	12.827
Ecad MO N-C	Non Clone- Clone	h4b6	7.943	162.74	16.485	760.347	12.827
Ecad MO N-C	Non Clone- Clone	h4b6	7.943	93.498	3.845	309.779	12.827
Ecad MO N-C	Non Clone- Clone	h4b6	7.943	74.24	2.615	349.545	12.827
Ecad MO N-C	Non Clone- Clone	h4b6	7.943	75.389	2.923	366.855	12.827
Ecad MO N-C	Non Clone- Clone	h5b1	10.375	256.38	31.931	1294.462	16.781
Ecad MO N-C	Non Clone- Clone	h5b1	10.375	215.951	26.606	2595.192	16.781
Ecad MO N-C	Non Clone- Clone	h5b1	10.375	188.72	6.734	3884.375	16.781
Ecad MO N-C	Non Clone- Clone	h5b1	10.375	135.84	2.719	1883.675	16.781
Ecad MO N-C	Non Clone- Clone	h5b1	10.375	87.007	0	460.604	16.781
Ecad MO N-C	Non Clone- Clone	h5b2	5.836	453.793	74.211	3938.137	9.398
Ecad MO N-C	Non Clone- Clone	h5b2	5.836	443.859	60.552	2681.426	9.398
Ecad MO N-C	Non Clone- Clone	h5b2	5.836	368.112	64.365	1696.517	9.398
Ecad MO N-C	Non Clone- Clone	h5b2	5.836	260.604	49.377	1066.694	9.398
Ecad MO N-C	Non Clone- Clone	h5b2	5.836	154.866	15.145	3237.073	9.398
Ecad MO N-C	Non Clone- Clone	h5b3	8.754	260.992	9.933	1487.339	14.145
Ecad MO N-C	Non Clone- Clone	h5b3	8.754	238.364	12.008	1095.672	14.145
Ecad MO N-C	Non Clone- Clone	h5b3	8.754	207.732	4.343	1830.497	14.145
Ecad MO N-C	Non Clone- Clone	h5b3	8.754	152.831	1.637	1162.667	14.145
Ecad MO N-C	Non Clone- Clone	h5b3	8.754	163.404	0.795	3822.876	14.145
Ecad MO N-C	Non Clone- Clone	h5b3	8.754	156.85	0.802	4069.221	14.145
Ecad MO N-C	Non Clone- Clone	h5b3	8.754	140.754	0.748	3560.149	14.145
Ecad MO N-C	Non Clone- Clone	h5b4	13.887	228.761	9.824	1694.287	22.492
Ecad MO N-C	Non Clone- Clone	h5b4	13.887	241.501	8.742	3287.854	22.492
Ecad MO N-C	Non Clone- Clone	h5b4	13.887	232.597	6.34	2053.012	22.492
Ecad MO N-C	Non Clone- Clone	h5b4	13.887	206.631	16.199	1588.256	22.492
Ecad MO N-C	Non Clone- Clone	h5b4	13.887	174.457	0.897	1224.173	22.492
Ecad MO N-C	Non Clone- Clone	h5b4	13.887	141.567	5.314	578.898	22.492
Ecad MO N-C	Non Clone- Clone	h5b5	9.186	192.974	12.317	784.523	14.848
Ecad MO N-C	Non Clone- Clone	h5b5	9.186	165.71	7.357	678.157	14.848
Ecad MO N-C	Non Clone- Clone	h5b5	9.186	150.619	4.875	689.3	14.848
Ecad MO N-C	Non Clone- Clone	h5b5	11.023	267.626	7.88	2792.8	17.835
Ecad MO N-C	Non Clone- Clone	h5b5	11.023	223.284	3.911	1561.697	17.835
Ecad MO N-C	Non Clone- Clone	h5b5	11.023	168.947	0.123	1803.783	17.835
Ecad MO N-C	Non Clone- Clone	h5b6	6.808	514.355	67.499	4095	10.982
Ecad MO N-C	Non Clone- Clone	h5b6	6.808	315.872	28.291	2342.107	10.982
Ecad MO N-C	Non Clone- Clone	h5b6	6.808	223.267	38.883	1625.181	10.982
Ecad MO N-C	Non Clone- Clone	h5b6	6.808	151.693	21.965	473.268	10.982
Ecad MO N-C	Non Clone- Clone	h5b6	6.808	111.578	19.104	308.546	10.982
Ecad MO N-C	Non Clone- Clone	h5b7	8.051	171.785	20.315	1036.896	13.003
Ecad MO N-C	Non Clone- Clone	h5b7	8.051	201.784	32.043	716.102	13.003
Ecad MO N-C	Non Clone- Clone	h5b7	8.051	186.71	12.793	710.366	13.003
Ecad MO N-C	Non Clone- Clone	h5b7	8.051	151.983	13.286	682.018	13.003
Ecad MO N-C	Non Clone- Clone	h5b7	8.051	120.6	4.886	1093.056	13.003
Ecad MO N-C	Non Clone- Clone	h5b7	8.051	105.802	3.84	1653.878	13.003
Ecad MO N-C	Non Clone- Clone	h5b7	8.051	104.009	0.887	2816.854	13.003
Ecad MO N-C	Non Clone- Clone	h6b1	9.402	271.32	25.956	2847.844	15.2
Ecad MO N-C	Non Clone- Clone	h6b1	9.402	179.103	14.187	1751.141	15.2
Ecad MO N-C	Non Clone- Clone	h6b1	9.402	137.942	5.18	1045.342	15.2
Ecad MO N-C	Non Clone- Clone	h6b1	9.402	127.898	2.259	862.25	15.2
Ecad MO N-C	Non Clone- Clone	h6b2	8.267	277.931	28.175	1709.393	13.355
Ecad MO N-C	Non Clone- Clone	h6b2	8.267	168.497	23.995	763.613	13.355
Ecad MO N-C	Non Clone- Clone	h6b2	8.267	135.387	13.413	957.164	13.355
Ecad MO N-C	Non Clone- Clone	h6b2	8.267	112.533	12.68	537.883	13.355
Ecad MO N-C	Non Clone- Clone	h6b3	10.05	333.712	33.954	1689.345	16.254
Ecad MO N-C	Non Clone- Clone	h6b3	10.05	247.18	16.348	1390.863	16.254
Ecad MO N-C	Non Clone- Clone	h6b3	10.05	144.053	10.686	562.43	16.254
Ecad MO N-C	Non Clone- Clone	h6b3	10.05	140.407	10.522	1132.313	16.254
Ecad MO N-C	Non Clone- Clone	h6b4	12.914	303.194	50.735	1367.965	20.91
Ecad MO N-C	Non Clone- Clone	h6b4	12.914	253.829	5.142	1154.767	20.91
Ecad MO N-C	Non Clone- Clone	h6b4	12.914	190.327	4.332	1093.361	20.91
Ecad MO N-C	Non Clone- Clone	h6b4	12.914	155.95	12.294	845.913	20.91
Ecad MO N-C	Non Clone- Clone	h6b5	7.457	353.369	33.295	1630.527	12.037
Ecad MO N-C	Non Clone- Clone	h6b5	7.457	365.998	37.18	1823.501	12.037
Ecad MO N-C	Non Clone- Clone	h6b5	7.457	338.876	21.549	1996.922	12.037
Ecad MO N-C	Non Clone- Clone	h6b5	7.457	272.492	11.831	986.415	12.037
Ecad MO N-C	Non Clone- Clone	h6b5	7.457	238.757	14.619	1782.241	12.037
Ecad MO N-C	Non Clone- Clone	h6b6	9.132	285.756	34.852	2085.802	14.76
Ecad MO N-C	Non Clone- Clone	h6b6	9.132	309.527	40.838	1230.897	14.76
Ecad MO N-C	Non Clone- Clone	h6b6	9.132	270.73	3.691	1660.42	14.76
Ecad MO N-C	Non Clone- Clone	h6b6	9.132	224.546	16.249	2313.067	14.76
Ecad MO N-C	Non Clone- Clone	h6b7	11.023	332.851	23.646	2525.389	17.835
Ecad MO N-C	Non Clone- Clone	h6b7	11.023	297.423	46.779	4092.042	17.835
Ecad MO N-C	Non Clone- Clone	h6b7	11.023	219.586	8.115	1415.487	17.835
Ecad MO N-C	Non Clone- Clone	h6b7	11.023	154.41	13.298	841.814	17.835
Ecad MO N-C	Non Clone- Clone	h7b1	8.213	430.102	51.356	3467.056	13.267
Ecad MO N-C	Non Clone- Clone	h7b1	8.213	498.323	110.361	1942.791	13.267
Ecad MO N-C	Non Clone- Clone	h7b1	8.213	481.775	96.481	2287.048	13.267
Ecad MO N-C	Non Clone- Clone	h7b1	8.213	355.223	68.831	1308.328	13.267
Ecad MO N-C	Non Clone- Clone	h7b1	8.213	252.037	29.414	957.655	13.267
Ecad MO N-C	Non Clone- Clone	h7b1	8.213	271.126	34.586	2469.927	13.267
Ecad MO N-C	Non Clone- Clone	h7b10	9.24	330.94	19.726	2359.055	14.936
Ecad MO N-C	Non Clone- Clone	h7b10	9.24	353.766	48.672	1651.706	14.936
Ecad MO N-C	Non Clone- Clone	h7b10	9.24	362.239	10.702	2688.893	14.936
Ecad MO N-C	Non Clone- Clone	h7b10	9.24	315.602	6.098	4088.705	14.936
Ecad MO N-C	Non Clone- Clone	h7b10	9.24	155.642	5.648	818.385	14.936
Ecad MO N-C	Non Clone- Clone	h7b10	9.24	104.208	1.513	511.691	14.936
Ecad MO N-C	Non Clone- Clone	h7b11	8.808	225.13	5.406	2907.853	14.223
Ecad MO N-C	Non Clone- Clone	h7b11	8.808	279.309	8.662	4095	14.223
Ecad MO N-C	Non Clone- Clone	h7b11	8.808	224.911	14.771	1303.355	14.223
Ecad MO N-C	Non Clone- Clone	h7b11	8.808	184.24	8.831	2115.38	14.223
Ecad MO N-C	Non Clone- Clone	h7b11	8.808	147.364	3.334	2618.863	14.223
Ecad MO N-C	Non Clone- Clone	h7b2	5.89	399.975	58.001	3727.216	9.489
Ecad MO N-C	Non Clone- Clone	h7b2	5.89	399.975	58.001	3727.216	9.489
Ecad MO N-C	Non Clone- Clone	h7b2	5.89	283.664	46.859	1703.429	9.489
Ecad MO N-C	Non Clone- Clone	h7b2	5.89	200.596	31.348	1434.222	9.489
Ecad MO N-C	Non Clone- Clone	h7b2	5.89	187.76	18.6	1330.177	9.489
Ecad MO N-C	Non Clone- Clone	h7b3	5.728	262.489	40.557	1176.76	9.225
Ecad MO N-C	Non Clone- Clone	h7b3	5.728	234.994	24.813	1093.121	9.225
Ecad MO N-C	Non Clone- Clone	h7b3	5.728	195.764	31.634	842.376	9.225
Ecad MO N-C	Non Clone- Clone	h7b4	11.996	507.522	48.694	4091.801	19.417
Ecad MO N-C	Non Clone- Clone	h7b4	11.996	391.962	53.267	1840.901	19.417
Ecad MO N-C	Non Clone- Clone	h7b4	11.996	269.454	23.759	1425.719	19.417
Ecad MO N-C	Non Clone- Clone	h7b4	11.996	210.086	15.053	2354.792	19.417
Ecad MO N-C	Non Clone- Clone	h7b4	11.996	187.522	15.845	3588.125	19.417
Ecad MO N-C	Non Clone- Clone	h7b5	7.727	381.404	71.532	2723.017	12.475
Ecad MO N-C	Non Clone- Clone	h7b5	7.727	408.086	57.436	2048.868	12.475
Ecad MO N-C	Non Clone- Clone	h7b5	7.727	353.783	32.368	3006.671	12.475
Ecad MO N-C	Non Clone- Clone	h7b5	7.727	232.338	9.648	1081.689	12.475
Ecad MO N-C	Non Clone- Clone	h7b6	4.755	469.714	37.009	3431.86	7.644
Ecad MO N-C	Non Clone- Clone	h7b6	4.755	438.286	56.475	3434.746	7.644
Ecad MO N-C	Non Clone- Clone	h7b6	4.755	283.804	39.919	799.055	7.644
Ecad MO N-C	Non Clone- Clone	h7b6	4.755	160.483	33.513	457.068	7.644
Ecad MO N-C	Non Clone- Clone	h7b7	9.564	364.803	49.456	3419.473	15.463
Ecad MO N-C	Non Clone- Clone	h7b7	9.564	313.881	12.381	1496.637	15.463
Ecad MO N-C	Non Clone- Clone	h7b7	9.564	258.591	40.523	1410.887	15.463
Ecad MO N-C	Non Clone- Clone	h7b7	9.564	205.15	22.516	1399.064	15.463
Ecad MO N-C	Non Clone- Clone	h7b7	9.564	181.529	2.789	3762.266	15.463
Ecad MO N-C	Non Clone- Clone	h7b8	7.997	392.053	73.539	2186.682	12.915
Ecad MO N-C	Non Clone- Clone	h7b8	7.997	382.247	82.586	3437.303	12.915
Ecad MO N-C	Non Clone- Clone	h7b8	7.997	311.241	62.93	1661.325	12.915
Ecad MO N-C	Non Clone- Clone	h7b8	7.997	234.864	38.769	1075.19	12.915
Ecad MO N-C	Non Clone- Clone	h7b8	7.997	233.774	27.728	3933.837	12.915
Ecad MO N-C	Non Clone- Clone	h7b8	7.997	275.22	14.639	4072.311	12.915
Ecad MO N-C	Non Clone- Clone	h7b9	8.754	376.717	50.428	2405.025	14.145
Ecad MO N-C	Non Clone- Clone	h7b9	8.754	382.09	79.871	2406.047	14.145
Ecad MO N-C	Non Clone- Clone	h7b9	8.754	352.398	35.102	1726.054	14.145
Ecad MO N-C	Non Clone- Clone	h7b9	8.754	235.955	29.463	1266.603	14.145
Ecad MO N-C	Non Clone- Clone	h7b9	8.754	126.331	2.033	658.357	14.145
Ecad MO N-C	Non Clone- Clone	h7b9	8.754	119.314	4.408	1897.692	14.145
Ecad MO N-C	Non Clone- Clone	h8b1	14.103	98.663	3.794	394.365	22.835
Ecad MO N-C	Non Clone- Clone	h8b1	14.103	172.538	14.702	517.781	22.835
Ecad MO N-C	Non Clone- Clone	h8b1	14.103	221.681	29.433	671.086	22.835
Ecad MO N-C	Non Clone- Clone	h8b1	13.346	291.061	48.082	1889.321	21.577
Ecad MO N-C	Non Clone- Clone	h8b1	13.346	353.44	67.018	2431.311	21.577
Ecad MO N-C	Non Clone- Clone	h8b1	13.022	375.895	48.001	2283.766	21.052
Ecad MO N-C	Non Clone- Clone	h8b1	13.022	242.09	20.336	1138.005	21.052
Ecad MO N-C	Non Clone- Clone	h8b2	9.564	186.029	8.841	547.749	15.463
Ecad MO N-C	Non Clone- Clone	h8b2	9.564	223.614	8.871	655.882	15.463
Ecad MO N-C	Non Clone- Clone	h8b2	9.564	242.929	22.778	725.683	15.463
Ecad MO N-C	Non Clone- Clone	h8b2	9.564	267.015	47.78	1677.611	15.463
Ecad MO N-C	Non Clone- Clone	h8b2	9.564	283.999	23.623	2347.038	15.463
Ecad MO N-C	Non Clone- Clone	h8b2	9.564	266.889	29.448	1420.175	15.463
Ecad MO N-C	Non Clone- Clone	h8b3	15.184	144.704	2.901	671.668	24.6
Ecad MO N-C	Non Clone- Clone	h8b3	15.184	181.86	4.758	989.53	24.6
Ecad MO N-C	Non Clone- Clone	h8b3	14.481	296.056	26.362	1186.902	23.458
Ecad MO N-C	Non Clone- Clone	h8b3	14.481	336.161	34.946	2209.588	23.458
Ecad MO N-C	Non Clone- Clone	h8b3	14.481	342.616	41.913	3700.913	23.458
Ecad MO N-C	Non Clone- Clone	h8b3	14.481	241.883	34.266	1979.158	23.458
Ecad MO N-C	Non Clone- Clone	h8b4	16.264	137.862	3.418	602.157	26.357
Ecad MO N-C	Non Clone- Clone	h8b4	16.264	195.698	14.573	811.74	26.357
Ecad MO N-C	Non Clone- Clone	h8b4	16.264	224.636	18.212	1401.627	26.357
Ecad MO N-C	Non Clone- Clone	h8b4	16.264	247.741	20.345	1435.116	26.357
Ecad MO N-C	Non Clone- Clone	h8b4	16.264	249.087	13.229	1300.746	26.357
Ecad MO N-C	Non Clone- Clone	h8b4	16.264	255.683	22.535	1257.04	26.357
Ecad MO N-C	Non Clone- Clone	h8b5	6.16	254.998	33.358	779.213	9.928
Ecad MO N-C	Non Clone- Clone	h8b5	6.16	305.991	35.513	854.435	9.928
Ecad MO N-C	Non Clone- Clone	h8b5	6.16	353.243	37.542	1444.907	9.928
Ecad MO N-C	Non Clone- Clone	h8b5	6.16	375.302	57.98	1313.13	9.928
Ecad MO N-C	Non Clone- Clone	h8b5	6.16	293.658	46.137	949.404	9.928
Ecad MO N-C	Non Clone- Clone	h8b6	10.591	288.517	32.999	782.83	17.132
Ecad MO N-C	Non Clone- Clone	h8b6	10.591	318.839	34.174	860.575	17.132
Ecad MO N-C	Non Clone- Clone	h8b6	10.591	328.764	67.758	1411.243	17.132
Ecad MO N-C	Non Clone- Clone	h8b6	10.591	325.339	56.847	3230.216	17.132
Ecad MO N-C	Non Clone- Clone	h8b6	10.591	288.93	57.646	1820.794	17.132
Ecad MO N-N	Non Clone- Non Clone	h2b1	9.834	745.844	129.467	3913.126	15.902
Ecad MO N-N	Non Clone- Non Clone	h2b1	9.834	560.302	108.886	3111.583	15.902
Ecad MO N-N	Non Clone- Non Clone	h2b1	9.834	470.074	63.605	1911.975	15.902
Ecad MO N-N	Non Clone- Non Clone	h2b1	9.834	370.299	27.602	4042.301	15.902
Ecad MO N-N	Non Clone- Non Clone	h2b1	9.834	291.303	8.801	4095	15.902
Ecad MO N-N	Non Clone- Non Clone	h2b1	9.834	154.777	5.051	1890.442	15.902
Ecad MO N-N	Non Clone- Non Clone	h2b2	6.484	673.674	89.827	3397.964	10.455
Ecad MO N-N	Non Clone- Non Clone	h2b2	6.484	646.322	87.529	3694.344	10.455
Ecad MO N-N	Non Clone- Non Clone	h2b2	6.484	485.55	58.318	1781.207	10.455
Ecad MO N-N	Non Clone- Non Clone	h2b2	6.484	354.173	39.787	1512.724	10.455
Ecad MO N-N	Non Clone- Non Clone	h2b2	6.484	253.502	31.3	3538.108	10.455
Ecad MO N-N	Non Clone- Non Clone	h2b2	6.484	194.57	11.829	2768.271	10.455
Ecad MO N-N	Non Clone- Non Clone	h2b3	11.725	665.555	96.854	3562.252	18.977
Ecad MO N-N	Non Clone- Non Clone	h2b3	11.725	494.694	87.028	1719.771	18.977
Ecad MO N-N	Non Clone- Non Clone	h2b3	11.725	348.809	10.377	1837.654	18.977
Ecad MO N-N	Non Clone- Non Clone	h2b3	11.725	328.885	44.478	3166.777	18.977
Ecad MO N-N	Non Clone- Non Clone	h2b4	6.916	911.211	213.722	4095	11.158
Ecad MO N-N	Non Clone- Non Clone	h2b4	6.916	884.79	217.047	2865.007	11.158
Ecad MO N-N	Non Clone- Non Clone	h2b4	6.916	666.403	97.856	2384.156	11.158
Ecad MO N-N	Non Clone- Non Clone	h2b4	6.916	315.624	72.668	1397.919	11.158
Ecad MO N-N	Non Clone- Non Clone	h2b4	6.916	188.444	35.587	816.111	11.158
Ecad MO N-N	Non Clone- Non Clone	h2b5	10.861	503.885	71.994	2560.537	17.52
Ecad MO N-N	Non Clone- Non Clone	h2b5	10.861	390.128	40.317	2219.225	17.52
Ecad MO N-N	Non Clone- Non Clone	h2b5	10.861	257.699	26.557	3027.69	17.52
Ecad MO N-N	Non Clone- Non Clone	h2b5	10.861	172.109	5.943	1215.369	17.52
Ecad MO N-N	Non Clone- Non Clone	h2b5	10.861	111.962	7.773	449.156	17.52
Ecad MO N-N	Non Clone- Non Clone	h3b1	7.673	472.093	7.152	3837.397	12.388
Ecad MO N-N	Non Clone- Non Clone	h3b1	7.673	336.072	15.646	3255.757	12.388
Ecad MO N-N	Non Clone- Non Clone	h3b1	7.673	259.462	17.324	3010.944	12.388
Ecad MO N-N	Non Clone- Non Clone	h3b1	7.673	164.154	8.679	1017.544	12.388
Ecad MO N-N	Non Clone- Non Clone	h3b1	7.673	147.141	9.557	800.598	12.388
Ecad MO N-N	Non Clone- Non Clone	h3b2	9.132	413.884	69.171	1767.041	14.758
Ecad MO N-N	Non Clone- Non Clone	h3b2	9.132	507.686	85.863	2176.088	14.758
Ecad MO N-N	Non Clone- Non Clone	h3b2	9.132	462.457	94.318	1359.297	14.758
Ecad MO N-N	Non Clone- Non Clone	h3b2	9.132	408.081	55.55	1336.986	14.758
Ecad MO N-N	Non Clone- Non Clone	h3b2	9.132	331.227	28.906	1128.721	14.758
Ecad MO N-N	Non Clone- Non Clone	h3b2	9.132	292.697	49.714	1970.335	14.758
Ecad MO N-N	Non Clone- Non Clone	h3b2	9.132	245.348	32.146	1269.662	14.758
Ecad MO N-N	Non Clone- Non Clone	h3b3	8.7	519.994	72.314	3446.026	14.057
Ecad MO N-N	Non Clone- Non Clone	h3b3	8.7	473.038	76.227	2016.792	14.057
Ecad MO N-N	Non Clone- Non Clone	h3b3	8.7	413.061	82.17	1553.32	14.057
Ecad MO N-N	Non Clone- Non Clone	h3b3	8.7	262.104	49.506	743.388	14.057
Ecad MO N-N	Non Clone- Non Clone	h3b3	8.7	166.046	23.922	777.288	14.057
Ecad MO N-N	Non Clone- Non Clone	h3b4	8.321	589.227	112.909	3165.532	13.442
Ecad MO N-N	Non Clone- Non Clone	h3b4	8.321	520.266	49.378	1655.779	13.442
Ecad MO N-N	Non Clone- Non Clone	h3b4	8.321	353.731	55.005	1758.492	13.442
Ecad MO N-N	Non Clone- Non Clone	h3b4	8.321	175.352	30.583	584.097	13.442
Ecad MO N-N	Non Clone- Non Clone	h3b4	8.321	128.561	8.207	356.736	13.442
Ecad MO N-N	Non Clone- Non Clone	h3b4	8.321	99.436	2.848	327.377	13.442
Ecad MO N-N	Non Clone- Non Clone	h3b5	8.591	360.396	102.709	1258.435	13.882
Ecad MO N-N	Non Clone- Non Clone	h3b5	8.591	307.534	42.985	1916.811	13.882
Ecad MO N-N	Non Clone- Non Clone	h3b5	8.591	198.479	4.419	809.295	13.882
Ecad MO N-N	Non Clone- Non Clone	h3b5	8.591	148.302	5.429	614.074	13.882
Ecad MO N-N	Non Clone- Non Clone	h3b5	8.591	112.81	10.931	400.865	13.882
Ecad MO N-N	Non Clone- Non Clone	h3b5	8.591	88.876	6.667	240.802	13.882
Ecad MO N-N	Non Clone- Non Clone	h3b6	10.915	385.337	36.562	1715.439	17.66
Ecad MO N-N	Non Clone- Non Clone	h3b6	10.915	323.603	35.207	2214.073	17.66
Ecad MO N-N	Non Clone- Non Clone	h3b6	10.915	193.182	7.601	1034.324	17.66
Ecad MO N-N	Non Clone- Non Clone	h3b6	10.915	114.942	2.713	549.549	17.66
Ecad MO N-N	Non Clone- Non Clone	h3b6	10.915	96.084	1.647	444.584	17.66
Ecad MO N-N	Non Clone- Non Clone	h3b6	10.915	75.569	2.704	612.605	17.66
Ecad MO N-N	Non Clone- Non Clone	h4b1	9.834	231.098	13.769	1356.353	15.902
Ecad MO N-N	Non Clone- Non Clone	h4b1	9.834	198.019	9.006	988.139	15.902
Ecad MO N-N	Non Clone- Non Clone	h4b1	9.834	141.578	7.923	589.398	15.902
Ecad MO N-N	Non Clone- Non Clone	h4b1	9.834	118.663	9.28	568.937	15.902
Ecad MO N-N	Non Clone- Non Clone	h4b1	9.834	119.751	0.291	461.5	15.902
Ecad MO N-N	Non Clone- Non Clone	h4b1	9.834	114.244	4.023	482.177	15.902
Ecad MO N-N	Non Clone- Non Clone	h4b2	8.862	443.897	85.187	2389.816	14.321
Ecad MO N-N	Non Clone- Non Clone	h4b2	8.862	367.562	38.532	2124.62	14.321
Ecad MO N-N	Non Clone- Non Clone	h4b2	8.862	222.643	22.276	1338.008	14.321
Ecad MO N-N	Non Clone- Non Clone	h4b2	8.862	138.574	3.604	510.697	14.321
Ecad MO N-N	Non Clone- Non Clone	h4b2	8.862	100.461	5.403	710.802	14.321
Ecad MO N-N	Non Clone- Non Clone	h4b2	8.862	90.191	6.982	411.651	14.321
Ecad MO N-N	Non Clone- Non Clone	h4b3	12.05	338.56	36.656	2067.004	19.504
Ecad MO N-N	Non Clone- Non Clone	h4b3	12.05	282.094	52.323	1768.096	19.504
Ecad MO N-N	Non Clone- Non Clone	h4b3	12.05	197.055	23.543	1001.672	19.504
Ecad MO N-N	Non Clone- Non Clone	h4b3	12.05	150.669	10.27	569.24	19.504
Ecad MO N-N	Non Clone- Non Clone	h4b3	12.05	116.957	4.266	775.498	19.504
Ecad MO N-N	Non Clone- Non Clone	h4b3	12.05	98.427	2.77	553.095	19.504
Ecad MO N-N	Non Clone- Non Clone	h4b4	10.212	254.653	31.753	836.7	16.517
Ecad MO N-N	Non Clone- Non Clone	h4b4	10.212	187.035	15.956	869.531	16.517
Ecad MO N-N	Non Clone- Non Clone	h4b4	10.212	156.053	10.448	732.591	16.517
Ecad MO N-N	Non Clone- Non Clone	h4b4	10.212	132.324	4.042	1189.268	16.517
Ecad MO N-N	Non Clone- Non Clone	h4b4	10.212	148.989	3.911	4090.906	16.517
Ecad MO N-N	Non Clone- Non Clone	h4b4	10.212	126.741	0	4095	16.517
Ecad MO N-N	Non Clone- Non Clone	h4b5	14.157	374.442	29.991	3633.526	22.931
Ecad MO N-N	Non Clone- Non Clone	h4b5	14.157	437.473	27.855	3539.012	22.931
Ecad MO N-N	Non Clone- Non Clone	h4b5	14.157	424.855	40.931	3186.074	22.931
Ecad MO N-N	Non Clone- Non Clone	h4b5	14.157	401.188	45.502	1767.505	22.931
Ecad MO N-N	Non Clone- Non Clone	h4b5	14.157	343.867	38.604	2964.938	22.931
Ecad MO N-N	Non Clone- Non Clone	h4b5	14.157	270.384	20.982	1901.097	22.931
Ecad MO N-N	Non Clone- Non Clone	h4b5	14.157	232.895	3.958	1052.285	22.931
Ecad MO N-N	Non Clone- Non Clone	h4b5	14.157	207.16	13.999	1223.523	22.931
Ecad MO N-N	Non Clone- Non Clone	h4b5	14.157	171.237	9.776	1575.886	22.931
Ecad MO N-N	Non Clone- Non Clone	h4b5	14.157	100.101	0.037	610.543	22.931
Ecad MO N-N	Non Clone- Non Clone	h4b6	11.023	328.789	11.494	2708.864	17.835
Ecad MO N-N	Non Clone- Non Clone	h4b6	11.023	329.024	39.029	1902.049	17.835
Ecad MO N-N	Non Clone- Non Clone	h4b6	11.023	278.45	25.71	1387.328	17.835
Ecad MO N-N	Non Clone- Non Clone	h4b6	11.023	205.516	15.321	880.215	17.835
Ecad MO N-N	Non Clone- Non Clone	h4b6	11.023	177.754	7.73	1003.299	17.835
Ecad MO N-N	Non Clone- Non Clone	h4b6	11.023	144.826	1.543	803.019	17.835
Ecad MO N-N	Non Clone- Non Clone	h4b6	11.023	113.889	0	1228.09	17.835
Ecad MO N-N	Non Clone- Non Clone	h4b7	10.429	665.472	77.349	3807.894	16.869
Ecad MO N-N	Non Clone- Non Clone	h4b7	10.429	484.175	64.029	2345.752	16.869
Ecad MO N-N	Non Clone- Non Clone	h4b7	10.429	384.247	49.975	2543.428	16.869
Ecad MO N-N	Non Clone- Non Clone	h4b7	10.429	242.626	31.603	1522.112	16.869
Ecad MO N-N	Non Clone- Non Clone	h4b7	10.429	156.58	16.302	622.784	16.869
Ecad MO N-N	Non Clone- Non Clone	h4b7	10.429	84.17	4.036	409.147	16.869
Ecad MO N-N	Non Clone- Non Clone	h4b7	10.429	63.262	5.173	229.149	16.869
Ecad MO N-N	Non Clone- Non Clone	h5b1	7.565	309.353	43.135	1405.632	12.212
Ecad MO N-N	Non Clone- Non Clone	h5b1	7.565	282.303	23.648	1358.944	12.212
Ecad MO N-N	Non Clone- Non Clone	h5b1	7.565	246.664	15.039	1131.272	12.212
Ecad MO N-N	Non Clone- Non Clone	h5b1	7.565	202.444	13.459	1274.398	12.212
Ecad MO N-N	Non Clone- Non Clone	h5b2	9.186	546.028	69.248	2855.262	14.848
Ecad MO N-N	Non Clone- Non Clone	h5b2	9.186	524.533	127.988	2072.486	14.848
Ecad MO N-N	Non Clone- Non Clone	h5b2	9.186	475.428	101.001	1718.493	14.848
Ecad MO N-N	Non Clone- Non Clone	h5b2	9.186	391.746	62.377	2070.278	14.848
Ecad MO N-N	Non Clone- Non Clone	h5b2	9.186	315.426	47.792	1253.683	14.848
Ecad MO N-N	Non Clone- Non Clone	h5b2	9.186	283.068	34.453	957.275	14.848
Ecad MO N-N	Non Clone- Non Clone	h5b3	8.537	181.004	11.587	973.648	13.794
Ecad MO N-N	Non Clone- Non Clone	h5b3	8.537	127.798	2.522	852.857	13.794
Ecad MO N-N	Non Clone- Non Clone	h5b3	8.537	103.317	0.728	441.425	13.794
Ecad MO N-N	Non Clone- Non Clone	h5b4	8.213	466.102	84.42	2200.615	13.267
Ecad MO N-N	Non Clone- Non Clone	h5b4	8.213	534.469	125.859	1878.24	13.267
Ecad MO N-N	Non Clone- Non Clone	h5b4	8.213	499.79	71.519	3414.849	13.267
Ecad MO N-N	Non Clone- Non Clone	h5b4	8.213	463.823	60.926	1912.681	13.267
Ecad MO N-N	Non Clone- Non Clone	h5b4	8.213	383.123	13.519	1450.224	13.267
Ecad MO N-N	Non Clone- Non Clone	h5b4	8.213	270.763	22.853	957.019	13.267
Ecad MO N-N	Non Clone- Non Clone	h5b4	8.213	159.932	5.763	1094.004	13.267
Ecad MO N-N	Non Clone- Non Clone	h5b5	8.754	509.864	119.683	2029.877	14.145
Ecad MO N-N	Non Clone- Non Clone	h5b5	8.754	469.856	86.843	2338.403	14.145
Ecad MO N-N	Non Clone- Non Clone	h5b5	8.754	391.809	43.495	1725.89	14.145
Ecad MO N-N	Non Clone- Non Clone	h5b5	8.754	311.518	31.457	1647.459	14.145
Ecad MO N-N	Non Clone- Non Clone	h5b5	8.754	237.57	30.266	1111.738	14.145
Ecad MO N-N	Non Clone- Non Clone	h5b5	8.754	208.935	13.514	1077.297	14.145
Ecad MO N-N	Non Clone- Non Clone	h5b6	8.429	372.136	66.59	1460.472	13.618
Ecad MO N-N	Non Clone- Non Clone	h5b6	8.429	324.155	50.819	2050.227	13.618
Ecad MO N-N	Non Clone- Non Clone	h5b6	8.429	277.515	60.537	1407.712	13.618
Ecad MO N-N	Non Clone- Non Clone	h5b6	8.429	240.891	49.041	1222.014	13.618
Ecad MO N-N	Non Clone- Non Clone	h5b6	8.429	210.651	6.686	1277.603	13.618
Ecad MO N-N	Non Clone- Non Clone	h6b1	10.915	349.508	39.251	2711.584	17.66
Ecad MO N-N	Non Clone- Non Clone	h6b1	10.915	366.911	23.416	1593.371	17.66
Ecad MO N-N	Non Clone- Non Clone	h6b1	10.915	328.136	29.699	2395.096	17.66
Ecad MO N-N	Non Clone- Non Clone	h6b1	10.915	193.44	13.118	845.978	17.66
Ecad MO N-N	Non Clone- Non Clone	h6b1	10.915	122.603	4.157	746.418	17.66
Ecad MO N-N	Non Clone- Non Clone	h6b1	10.915	88.979	3.529	366.584	17.66
Ecad MO N-N	Non Clone- Non Clone	h6b2	10.158	578.224	63.716	2055.841	16.43
Ecad MO N-N	Non Clone- Non Clone	h6b2	10.158	490.122	51.224	1422.033	16.43
Ecad MO N-N	Non Clone- Non Clone	h6b2	10.158	382.719	54.993	2840.505	16.43
Ecad MO N-N	Non Clone- Non Clone	h6b2	10.158	269.163	25.129	3380.282	16.43
Ecad MO N-N	Non Clone- Non Clone	h6b2	10.158	143.419	2.271	851.001	16.43
Ecad MO N-N	Non Clone- Non Clone	h6b3	10.429	440.629	62.561	3034.409	16.869
Ecad MO N-N	Non Clone- Non Clone	h6b3	10.429	407.078	47.123	1884.766	16.869
Ecad MO N-N	Non Clone- Non Clone	h6b3	10.429	356.741	39.898	1015.194	16.869
Ecad MO N-N	Non Clone- Non Clone	h6b3	10.429	308.879	33.768	1958.903	16.869
Ecad MO N-N	Non Clone- Non Clone	h6b3	10.429	222.899	9.965	2704.917	16.869
Ecad MO N-N	Non Clone- Non Clone	h6b3	10.429	149.127	11.431	947.293	16.869
Ecad MO N-N	Non Clone- Non Clone	h6b3	10.429	125.17	1.754	654.036	16.869
Ecad MO N-N	Non Clone- Non Clone	h6b4	6.106	496.183	72.969	1564.821	9.84
Ecad MO N-N	Non Clone- Non Clone	h6b4	6.106	513.019	72.075	2181.01	9.84
Ecad MO N-N	Non Clone- Non Clone	h6b4	6.106	422.279	59.195	3857.642	9.84
Ecad MO N-N	Non Clone- Non Clone	h6b4	6.106	249.064	26.541	3192.711	9.84
Ecad MO N-N	Non Clone- Non Clone	h6b4	6.106	166.715	10.124	657.116	9.84
Ecad MO N-N	Non Clone- Non Clone	h6b4	6.106	134.657	10.092	626.388	9.84
Ecad MO N-N	Non Clone- Non Clone	h6b5	8.159	714.673	77.698	3926.445	13.179
Ecad MO N-N	Non Clone- Non Clone	h6b5	8.159	534.635	34.55	3672.724	13.179
Ecad MO N-N	Non Clone- Non Clone	h6b5	8.159	375.349	27.777	3050.958	13.179
Ecad MO N-N	Non Clone- Non Clone	h6b5	8.159	203.933	10.031	1298.094	13.179
Ecad MO N-N	Non Clone- Non Clone	h6b5	8.159	109.96	7.712	439.793	13.179
Ecad MO N-N	Non Clone- Non Clone	h6b5	8.159	63.405	0.453	406.502	13.179
Ecad MO N-N	Non Clone- Non Clone	h6b5	8.159	54.424	0.157	805.935	13.179
Ecad MO N-N	Non Clone- Non Clone	h6b6	7.241	569.119	115.339	2324.469	11.685
Ecad MO N-N	Non Clone- Non Clone	h6b6	7.241	518.366	64.974	2022.203	11.685
Ecad MO N-N	Non Clone- Non Clone	h6b6	7.241	380.864	42.993	1311.542	11.685
Ecad MO N-N	Non Clone- Non Clone	h6b6	7.241	235.328	37.149	733.057	11.685
Ecad MO N-N	Non Clone- Non Clone	h6b6	7.241	118.097	12.183	415.703	11.685
Ecad MO N-N	Non Clone- Non Clone	h7b1	9.618	448.155	75.95	2858.502	15.551
Ecad MO N-N	Non Clone- Non Clone	h7b1	9.618	452.802	87.58	2218.735	15.551
Ecad MO N-N	Non Clone- Non Clone	h7b1	9.618	423.922	62.457	3315.986	15.551
Ecad MO N-N	Non Clone- Non Clone	h7b1	9.618	328.162	42.25	1610.203	15.551
Ecad MO N-N	Non Clone- Non Clone	h7b1	9.618	229.019	46.145	1881.66	15.551
Ecad MO N-N	Non Clone- Non Clone	h7b10	11.509	224.044	19.651	2208.943	18.626
Ecad MO N-N	Non Clone- Non Clone	h7b10	11.509	224.38	12.764	4019.517	18.626
Ecad MO N-N	Non Clone- Non Clone	h7b10	11.509	207.284	3.465	3162.746	18.626
Ecad MO N-N	Non Clone- Non Clone	h7b10	11.509	135.592	3.012	584.288	18.626
Ecad MO N-N	Non Clone- Non Clone	h7b2	14.265	516.801	94.687	3668.031	23.07
Ecad MO N-N	Non Clone- Non Clone	h7b2	14.265	434.964	52.841	3265.764	23.07
Ecad MO N-N	Non Clone- Non Clone	h7b2	14.265	276.583	35.105	1281.237	23.07
Ecad MO N-N	Non Clone- Non Clone	h7b2	14.265	144.824	15.316	425.461	23.07
Ecad MO N-N	Non Clone- Non Clone	h7b3	8.754	368.834	62.72	1482.944	14.145
Ecad MO N-N	Non Clone- Non Clone	h7b3	8.754	309.509	26.99	1474.575	14.145
Ecad MO N-N	Non Clone- Non Clone	h7b3	8.754	261.717	21.606	3032.163	14.145
Ecad MO N-N	Non Clone- Non Clone	h7b3	8.754	254.661	15.629	4095	14.145
Ecad MO N-N	Non Clone- Non Clone	h7b4	9.996	589.708	76.833	4095	16.166
Ecad MO N-N	Non Clone- Non Clone	h7b4	9.996	333.433	68.212	1500.039	16.166
Ecad MO N-N	Non Clone- Non Clone	h7b4	9.996	210.287	43.115	618.808	16.166
Ecad MO N-N	Non Clone- Non Clone	h7b4	9.996	151.74	16.789	499.053	16.166
Ecad MO N-N	Non Clone- Non Clone	h7b5	8.483	440.504	82.55	2101.93	13.706
Ecad MO N-N	Non Clone- Non Clone	h7b5	8.483	332.795	66.208	2232.824	13.706
Ecad MO N-N	Non Clone- Non Clone	h7b5	8.483	268.272	47.566	1636.965	13.706
Ecad MO N-N	Non Clone- Non Clone	h7b5	8.483	200.077	21.964	1641.671	13.706
Ecad MO N-N	Non Clone- Non Clone	h7b5	8.483	179.333	27.294	802.919	13.706
Ecad MO N-N	Non Clone- Non Clone	h7b6	9.078	415.506	64.743	1722.62	14.672
Ecad MO N-N	Non Clone- Non Clone	h7b6	9.078	333.117	42.278	1029.898	14.672
Ecad MO N-N	Non Clone- Non Clone	h7b6	9.078	187.28	15.759	630.746	14.672
Ecad MO N-N	Non Clone- Non Clone	h7b6	9.078	97.038	7.907	395.413	14.672
Ecad MO N-N	Non Clone- Non Clone	h7b6	9.078	84.46	1.282	583.601	14.672
Ecad MO N-N	Non Clone- Non Clone	h7b7	8.591	579.116	74.646	2021.876	13.876
Ecad MO N-N	Non Clone- Non Clone	h7b7	8.591	448.085	39.729	1538.371	13.876
Ecad MO N-N	Non Clone- Non Clone	h7b7	8.591	184.083	36.781	529.397	13.876
Ecad MO N-N	Non Clone- Non Clone	h7b7	8.591	125.353	7.592	456.842	13.876
Ecad MO N-N	Non Clone- Non Clone	h7b7	8.591	98.133	6.669	506.12	13.876
Ecad MO N-N	Non Clone- Non Clone	h7b8	12.536	490.688	64.191	3037.19	20.295
Ecad MO N-N	Non Clone- Non Clone	h7b8	12.536	452.975	63.315	2882.289	20.295
Ecad MO N-N	Non Clone- Non Clone	h7b8	12.536	352.854	54.814	1876.777	20.295
Ecad MO N-N	Non Clone- Non Clone	h7b8	12.536	272.147	19.581	1522.087	20.295
Ecad MO N-N	Non Clone- Non Clone	h7b8	12.536	167.922	8.509	1334.282	20.295
Ecad MO N-N	Non Clone- Non Clone	h7b8	12.536	129.552	8.568	1926.846	20.295
Ecad MO N-N	Non Clone- Non Clone	h7b9	4.863	396.448	34.01	1718.139	7.819
Ecad MO N-N	Non Clone- Non Clone	h7b9	4.863	232.408	33.685	1071.63	7.819
Ecad MO N-N	Non Clone- Non Clone	h7b9	4.863	115.95	7.791	443.419	7.819
Ecad MO N-N	Non Clone- Non Clone	h7b9	4.863	71.685	6.064	437.313	7.819
Ecad MO N-N	Non Clone- Non Clone	h7b9	4.863	56.179	0.65	505.232	7.819
Ecad MO C-C	Clone-Clone	h1b1	6.214	349.969	41.309	3651.226	10.016
Ecad MO C-C	Clone-Clone	h1b1	6.214	198.201	10.899	1850.386	10.016
Ecad MO C-C	Clone-Clone	h1b1	6.214	109.932	4.173	662.454	10.016
Ecad MO C-C	Clone-Clone	h1b1	6.214	83.871	3.079	712.124	10.016
Ecad MO C-C	Clone-Clone	h1b1	6.214	59.007	0.09	739.307	10.016
