# Supplementary material for: Stepwise polarisation of developing bilayered epidermis is mediated by aPKC and E-cadherin in zebrafish
Source: eLife. 2020 Jan 22;9:e49064. doi: 10.7554/eLife.49064 (PMC6975926; doi:10.7554/eLife.49064)
Supplement: Figure 4—source data 1. [file elife-49064-fig4-data1.csv]

Genotype	Boundary	Cell name	Area	Mean	Min	Max	Length
Ctrl MO C-C	Clone- Clone	h1b1	12.644	501.176	18.283	4067.901	20.471
Ctrl MO C-C	Clone- Clone	h1b1	12.644	691.929	22.984	4095	20.471
Ctrl MO C-C	Clone- Clone	h1b1	12.644	780.404	70.096	3794.565	20.471
Ctrl MO C-C	Clone- Clone	h1b1	12.644	680.291	103.052	4045.953	20.471
Ctrl MO C-C	Clone- Clone	h1b1	12.644	589.47	74.072	4095	20.471
Ctrl MO C-C	Clone- Clone	h1b1	12.644	565.009	47.963	4095	20.471
Ctrl MO C-C	Clone- Clone	h1b1	12.752	1389.398	161.538	4095	20.647
Ctrl MO C-C	Clone- Clone	h1b1	12.752	1414.479	282.208	4095	20.647
Ctrl MO C-C	Clone- Clone	h1b1	12.752	1417.291	279.242	4095	20.647
Ctrl MO C-C	Clone- Clone
Ctrl MO C-C	Clone- Clone	h1b2	10.266	517.628	9.444	2580.543	16.605
Ctrl MO C-C	Clone- Clone	h1b2	10.266	625.732	8.639	3072.389	16.605
Ctrl MO C-C	Clone- Clone	h1b2	10.266	608.591	23.482	3103.899	16.605
Ctrl MO C-C	Clone- Clone	h1b2	10.266	776.187	44.166	4036.332	16.605
Ctrl MO C-C	Clone- Clone	h1b2	10.266	1043.251	51.118	4091.316	16.605
Ctrl MO C-C	Clone- Clone	h1b2	10.266	1105.015	113.866	4094.804	16.605
Ctrl MO C-C	Clone- Clone	h1b2	10.266	1139.442	104.314	4094.715	16.605
Ctrl MO C-C	Clone- Clone	h1b2	10.266	1104.803	170.251	4036.757	16.605
Ctrl MO C-C	Clone- Clone
Ctrl MO C-C	Clone- Clone	h1b3	5.403	619.177	31.923	1668.583	8.697
Ctrl MO C-C	Clone- Clone	h1b3	5.403	814.378	76.631	2124.718	8.697
Ctrl MO C-C	Clone- Clone	h1b3	5.403	893.479	77.853	3936.847	8.697
Ctrl MO C-C	Clone- Clone	h1b3	5.403	933.616	93.066	4095	8.697
Ctrl MO C-C	Clone- Clone	h1b3	5.403	950.74	140.887	4095	8.697
Ctrl MO C-C	Clone- Clone	h1b3	5.403	983.066	102.393	4095	8.697
Ctrl MO C-C	Clone- Clone	h1b3	5.403	1045.171	122.468	4095	8.697
Ctrl MO C-C	Clone- Clone	h1b3	5.403	1122.567	160.43	3632.85	8.697
Ctrl MO C-C	Clone- Clone	h1b3	5.403	951.872	139.918	4041.925	8.697
Ctrl MO C-C	Clone- Clone	h1b3	5.403	662.437	60.715	3894.245	8.697
Ctrl MO C-C	Clone- Clone
Ctrl MO C-C	Clone- Clone	h1b4	12.05	506.142	38.781	2706.005	19.505
Ctrl MO C-C	Clone- Clone	h1b4	12.05	608.612	26.55	3267.397	19.505
Ctrl MO C-C	Clone- Clone	h1b4	12.05	755.585	112.811	3427.671	19.505
Ctrl MO C-C	Clone- Clone	h1b4	12.05	896.634	85.036	4077.649	19.505
Ctrl MO C-C	Clone- Clone	h1b4	12.05	880.587	90.192	4095	19.505
Ctrl MO C-C	Clone- Clone	h1b4	11.401	1706.144	218.497	4095	18.45
Ctrl MO C-C	Clone- Clone	h1b4	11.401	1694.902	195.922	4095	18.45
Ctrl MO C-C	Clone- Clone	h1b4	11.401	1462.04	208.016	4094.992	18.45
Ctrl MO C-C	Clone- Clone	h1b4	11.401	1097.49	143.076	4092.712	18.45
Ctrl MO C-C	Clone- Clone
Ctrl MO C-C	Clone- Clone	h1b5	7.943	746.725	45.326	2557.772	12.811
Ctrl MO C-C	Clone- Clone	h1b5	7.943	827.178	56.006	2165.791	12.811
Ctrl MO C-C	Clone- Clone	h1b5	7.943	738.3	109.755	3174.698	12.811
Ctrl MO C-C	Clone- Clone	h1b5	7.943	725.699	72.035	3688.76	12.811
Ctrl MO C-C	Clone- Clone	h1b5	7.943	724.695	88.891	4095	12.811
Ctrl MO C-C	Clone- Clone	h1b5	7.943	770.124	123.741	4024.092	12.811
Ctrl MO C-C	Clone- Clone	h1b5	7.943	930.996	179.414	3817.638	12.811
Ctrl MO C-C	Clone- Clone
Ctrl MO C-C	Clone- Clone	h1b6	5.295	745.931	104.955	3495.615	8.522
Ctrl MO C-C	Clone- Clone	h1b6	5.295	783.761	102.455	4008.211	8.522
Ctrl MO C-C	Clone- Clone	h1b6	5.295	875.406	135.892	4095	8.522
Ctrl MO C-C	Clone- Clone	h1b6	5.295	1238.833	314.993	4095	8.522
Ctrl MO C-C	Clone- Clone	h1b6	5.295	1875.045	209.982	4095	8.522
Ctrl MO C-C	Clone- Clone	h1b6	5.295	1892.417	346.378	4095	8.522
Ctrl MO C-C	Clone- Clone	h1b6	5.295	1590.181	413.948	4027.716	8.522
Ctrl MO C-C	Clone- Clone	h1b6	5.295	1367.792	321.674	4088.121	8.522
Ctrl MO C-C	Clone- Clone
Ctrl MO C-C	Clone- Clone	h1b7	8.429	1347.078	127.773	4095	13.618
Ctrl MO C-C	Clone- Clone	h1b7	8.429	1268.714	145.368	4095	13.618
Ctrl MO C-C	Clone- Clone	h1b7	8.429	1262.011	235.027	4095	13.618
Ctrl MO C-C	Clone- Clone	h1b7	8.429	1559.964	239.12	4095	13.618
Ctrl MO C-C	Clone- Clone	h1b7	8.429	1697.515	268.71	4095	13.618
Ctrl MO C-C	Clone- Clone	h1b7	8.429	1548.559	246.404	4095	13.618
Ctrl MO C-C	Clone- Clone	h1b7	8.429	1197.412	125.867	4095	13.618
Ctrl MO C-C	Clone- Clone	h1b7	8.429	780.99	27.679	4061.828	13.618
Ctrl MO C-C	Clone- Clone
Ctrl MO C-C	Clone- Clone	h1b8	9.024	840.348	17.515	4094.928	14.585
Ctrl MO C-C	Clone- Clone	h1b8	9.024	868.48	23.655	4095	14.585
Ctrl MO C-C	Clone- Clone	h1b8	9.024	986.814	40.947	4095	14.585
Ctrl MO C-C	Clone- Clone	h1b8	9.024	1436.889	95.883	4095	14.585
Ctrl MO C-C	Clone- Clone	h1b8	9.024	1936.629	138.014	4095	14.585
Ctrl MO C-C	Clone- Clone	h1b8	9.024	1944.641	154.744	4095	14.585
Ctrl MO C-C	Clone- Clone	h1b8	9.024	1867.146	148.209	4095	14.585
Ctrl MO C-C	Clone- Clone	h1b8	9.024	1538.65	151.364	4095	14.585
Ctrl MO C-C	Clone- Clone	h1b8	9.024	1251.647	148.062	4095	14.585
Ctrl MO C-C	Clone- Clone
Ctrl MO C-C	Clone- Clone	h1b9	7.078	977.719	19.341	4095	11.422
Ctrl MO C-C	Clone- Clone	h1b9	7.078	1003.446	42.155	4095	11.422
Ctrl MO C-C	Clone- Clone	h1b9	7.078	1047.75	35.901	4095	11.422
Ctrl MO C-C	Clone- Clone	h1b9	7.078	1131.938	69.668	4095	11.422
Ctrl MO C-C	Clone- Clone	h1b9	7.078	998.362	116.721	4095	11.422
Ctrl MO C-C	Clone- Clone	h1b9	6.16	2305.906	367.265	4095	9.928
Ctrl MO C-C	Clone- Clone	h1b9	6.16	2209.815	376.719	4095	9.928
Ctrl MO C-C	Clone- Clone	h1b9	6.16	1789.153	343.291	4095	9.928
Ctrl MO C-C	Clone- Clone	h1b9	6.16	1132.667	153.656	4018.872	9.928
Ctrl MO C-C	Clone- Clone
Ctrl MO C-C	Clone- Clone	h1b10	11.888	1136.669	29.287	4038.119	19.241
Ctrl MO C-C	Clone- Clone	h1b10	11.888	1298.439	103.449	4078.712	19.241
Ctrl MO C-C	Clone- Clone	h1b10	11.888	1728.915	165.666	4095	19.241
Ctrl MO C-C	Clone- Clone	h1b10	11.888	2173.163	213.141	4095	19.241
Ctrl MO C-C	Clone- Clone	h1b10	11.888	2129.697	145.208	4095	19.241
Ctrl MO C-C	Clone- Clone	h1b10	11.888	1893.084	119.418	4095	19.241
Ctrl MO C-C	Clone- Clone	h1b10	13.13	2332.53	191.681	4095	21.262
Ctrl MO C-C	Clone- Clone	h1b10	13.13	1744.417	256.759	4095	21.262
Ctrl MO C-C	Clone- Clone	h1b10	13.13	1066.614	93.054	4095	21.262
Ctrl MO C-C	Clone- Clone
Ctrl MO C-C	Clone- Clone	h1b11	11.779	575.35	19.957	3292.437	19.065
Ctrl MO C-C	Clone- Clone	h1b11	11.779	750.336	10.145	3989.486	19.065
Ctrl MO C-C	Clone- Clone	h1b11	11.779	705.868	9.833	2798.219	19.065
Ctrl MO C-C	Clone- Clone	h1b11	11.779	467.852	34.966	1474.41	19.065
Ctrl MO C-C	Clone- Clone	h1b11	11.779	382.699	37.604	2172.133	19.065
Ctrl MO C-C	Clone- Clone	h1b11	13.4	1072.257	90.815	4095	21.701
Ctrl MO C-C	Clone- Clone	h1b11	13.4	1249.65	70.212	4095	21.701
Ctrl MO C-C	Clone- Clone	h1b11	13.4	1438.462	93.286	4095	21.701
Ctrl MO C-C	Clone- Clone	h1b11	13.4	1424.758	151.497	4095	21.701
Ctrl MO C-C	Clone- Clone	h1b11	13.4	1334.089	113.874	4094.763	21.701
Ctrl MO C-C	Clone- Clone
Ctrl MO C-C	Clone- Clone	h1b12	3.296	916.565	0	4095	5.271
Ctrl MO C-C	Clone- Clone	h1b12	3.296	1127.321	0	4095	5.271
Ctrl MO C-C	Clone- Clone	h1b12	3.296	1251.637	0	4095	5.271
Ctrl MO C-C	Clone- Clone	h1b12	3.296	1739.561	0	4095	5.271
Ctrl MO C-C	Clone- Clone	h1b12	3.296	1869.286	0	4095	5.271
Ctrl MO C-C	Clone- Clone	h1b12	3.296	1775.435	0	4095	5.271
Ctrl MO C-C	Clone- Clone	h1b12	3.296	1282.76	0	3417.91	5.271
Ctrl MO C-C	Clone- Clone
Ctrl MO C-C	Clone- Clone	h1b13	5.295	768.674	0	4046.337	8.522
Ctrl MO C-C	Clone- Clone	h1b13	5.295	795.55	0	4095	8.522
Ctrl MO C-C	Clone- Clone	h1b13	5.295	807.723	0	4095	8.522
Ctrl MO C-C	Clone- Clone	h1b13	5.295	793.425	0	4095	8.522
Ctrl MO C-C	Clone- Clone	h1b13	5.295	839.679	0	4095	8.522
Ctrl MO C-C	Clone- Clone	h1b13	5.295	954.885	0	3159.624	8.522
Ctrl MO C-C	Clone- Clone	h1b13	5.295	832.652	0	3976.554	8.522
Ctrl MO C-C	Clone- Clone
Ctrl MO C-C	Clone- Clone	h1b14	8.483	473.17	1.982	2466.169	13.706
Ctrl MO C-C	Clone- Clone	h1b14	8.483	568.619	5.672	2347.988	13.706
Ctrl MO C-C	Clone- Clone	h1b14	8.483	525.882	4.298	3258.466	13.706
Ctrl MO C-C	Clone- Clone	h1b14	8.483	437.774	38.587	3915.985	13.706
Ctrl MO C-C	Clone- Clone	h1b14	8.483	474.43	36.365	4095	13.706
Ctrl MO C-C	Clone- Clone	h1b14	8.483	527.865	45.926	4095	13.706
Ctrl MO C-C	Clone- Clone	h1b14	8.483	605.436	67.617	4095	13.706
Ctrl MO C-C	Clone- Clone
Ctrl MO C-C	Clone- Clone	h1b15	9.942	457.447	9.475	1683.71	16.078
Ctrl MO C-C	Clone- Clone	h1b15	9.942	560.224	38.926	2469.238	16.078
Ctrl MO C-C	Clone- Clone	h1b15	9.456	757.332	99.339	4039.745	15.287
Ctrl MO C-C	Clone- Clone	h1b15	9.456	793.323	107.767	4095	15.287
Ctrl MO C-C	Clone- Clone	h1b15	9.456	1101.654	207.849	4095	15.287
Ctrl MO C-C	Clone- Clone	h1b15	9.456	1357.209	109.489	4095	15.287
Ctrl MO C-C	Clone- Clone	h1b15	9.456	1695.832	125.148	4095	15.287
Ctrl MO C-C	Clone- Clone	h1b15	9.456	1821.619	120.868	4095	15.287
Ctrl MO C-C	Clone- Clone	h1b15	9.456	1178.562	44.335	4095	15.287
Ctrl MO C-C	Clone- Clone
Ctrl MO C-C	Clone- Clone	h1b16	8.862	517.467	9.008	2523.997	14.321
Ctrl MO C-C	Clone- Clone	h1b16	8.862	715.514	32.57	4002.438	14.321
Ctrl MO C-C	Clone- Clone	h1b16	8.862	730.717	35.403	4095	14.321
Ctrl MO C-C	Clone- Clone	h1b16	8.862	697.367	83.366	4095	14.321
Ctrl MO C-C	Clone- Clone	h1b16	8.862	917.226	114.506	4095	14.321
Ctrl MO C-C	Clone- Clone	h1b16	8.862	1128.532	105.455	4095	14.321
Ctrl MO C-C	Clone- Clone	h1b16	8.862	1351.171	153.094	4095	14.321
Ctrl MO C-C	Clone- Clone	h1b16	8.862	1443.666	115.847	4077.83	14.321
Ctrl MO C-C	Clone- Clone	h1b16	8.862	1191.113	139.054	4069.317	14.321
Ctrl MO C-C	Clone- Clone	h1b16	8.862	996.417	43.582	3466.424	14.321
Ctrl MO C-C	Clone- Clone
Ctrl MO C-C	Clone- Clone	h1b17	10.753	657.342	27.9	2831.649	17.394
Ctrl MO C-C	Clone- Clone	h1b17	10.753	886.665	20.745	4006.79	17.394
Ctrl MO C-C	Clone- Clone	h1b17	10.753	889.594	64.343	4095	17.394
Ctrl MO C-C	Clone- Clone	h1b17	10.753	866.586	49.996	4095	17.394
Ctrl MO C-C	Clone- Clone	h1b17	10.753	1023.297	75.293	4095	17.394
Ctrl MO C-C	Clone- Clone	h1b17	10.753	1090.879	151.985	3384.228	17.394
Ctrl MO C-C	Clone- Clone	h1b17	10.753	1144.028	223.88	4090.834	17.394
Ctrl MO C-C	Clone- Clone	h1b17	10.753	1162.427	134.632	4095	17.394
Ctrl MO C-C	Clone- Clone
Ctrl MO C-C	Clone- Clone	h1b18	11.888	709.9	30.297	4021.561	19.241
Ctrl MO C-C	Clone- Clone	h1b18	11.888	849.693	16.666	4095	19.241
Ctrl MO C-C	Clone- Clone	h1b18	11.888	834.554	68.104	4095	19.241
Ctrl MO C-C	Clone- Clone	h1b18	11.888	985.411	106.675	4094.5	19.241
Ctrl MO C-C	Clone- Clone	h1b18	11.888	1425.901	112.532	4095	19.241
Ctrl MO C-C	Clone- Clone	h1b18	11.888	1529.088	123.521	4078.159	19.241
Ctrl MO C-C	Clone- Clone	h1b18	11.888	1592.924	250.601	4095	19.241
Ctrl MO C-C	Clone- Clone	h1b18	11.888	1693.667	186.208	4095	19.241
Ctrl MO C-C	Clone- Clone
Ctrl MO C-C	Clone- Clone	h1b19	7.727	550.525	8.715	1946.749	12.476
Ctrl MO C-C	Clone- Clone	h1b19	7.727	798.284	38.489	2657.034	12.476
Ctrl MO C-C	Clone- Clone	h1b19	7.727	796.272	27.602	4095	12.476
Ctrl MO C-C	Clone- Clone	h1b19	7.727	688.016	56.86	4085.709	12.476
Ctrl MO C-C	Clone- Clone	h1b19	7.727	845.335	49.886	4088.346	12.476
Ctrl MO C-C	Clone- Clone	h1b19	7.727	1028.081	109.158	4095	12.476
Ctrl MO C-C	Clone- Clone	h1b19	7.727	1191.768	117.892	4095	12.476
Ctrl MO C-C	Clone- Clone	h1b19	7.511	1567.758	145.597	4087.468	12.12
Ctrl MO C-C	Clone- Clone	h1b19	7.511	677.401	74.557	4095	12.12
Ctrl MO C-C	Clone- Clone	h1b19	7.511	418.152	44.393	2222.594	12.12
Ctrl MO C-C	Clone- Clone	h2b1	10.05	596.268	37.37	4095	16.254
Ctrl MO C-C	Clone- Clone	h2b1	10.05	814.238	83.598	4095	16.254
Ctrl MO C-C	Clone- Clone	h2b1	10.05	1105.099	89.945	4095	16.254
Ctrl MO C-C	Clone- Clone	h2b1	10.05	1173.466	179.659	4095	16.254
Ctrl MO C-C	Clone- Clone	h2b1	10.05	1247.244	133.118	4095	16.254
Ctrl MO C-C	Clone- Clone	h2b1	10.05	1243.803	228.047	3856.892	16.254
Ctrl MO C-C	Clone- Clone	h2b1	10.05	1060.829	167.726	3871.282	16.254
Ctrl MO C-C	Clone- Clone
Ctrl MO C-C	Clone- Clone	h2b2	10.321	332.543	8.568	1136.295	16.693
Ctrl MO C-C	Clone- Clone	h2b2	10.321	549.478	16.638	2021.411	16.693
Ctrl MO C-C	Clone- Clone	h2b2	10.321	710.212	42.382	3935.901	16.693
Ctrl MO C-C	Clone- Clone	h2b2	10.321	981.454	82.934	4095	16.693
Ctrl MO C-C	Clone- Clone	h2b2	10.321	1049.818	27.962	4095	16.693
Ctrl MO C-C	Clone- Clone	h2b2	10.321	1062.561	81.091	3895.578	16.693
Ctrl MO C-C	Clone- Clone	h2b2	10.321	1107.784	63.363	4095	16.693
Ctrl MO C-C	Clone- Clone	h2b2	10.321	1001.61	32.567	4090.732	16.693
Ctrl MO C-C	Clone- Clone
Ctrl MO C-C	Clone- Clone	h2b3	3.458	606.932	13.964	2866.103	5.535
Ctrl MO C-C	Clone- Clone	h2b3	3.458	981.317	33.906	4095	5.535
Ctrl MO C-C	Clone- Clone	h2b3	3.458	990.633	130.369	4095	5.535
Ctrl MO C-C	Clone- Clone	h2b3	3.458	1316.034	220.12	4095	5.535
Ctrl MO C-C	Clone- Clone	h2b3	3.458	1452.821	201.658	4095	5.535
Ctrl MO C-C	Clone- Clone	h2b3	3.458	1593.199	247.961	4095	5.535
Ctrl MO C-C	Clone- Clone	h2b3	3.458	1598.966	186.869	4084.855	5.535
Ctrl MO C-C	Clone- Clone	h2b3	3.458	1194.305	156.136	4095	5.535
Ctrl MO C-C	Clone- Clone
Ctrl MO C-C	Clone- Clone	h2b4	2.918	593.032	68.891	2083.498	4.587
Ctrl MO C-C	Clone- Clone	h2b4	2.918	1290.497	220.825	4095	4.587
Ctrl MO C-C	Clone- Clone	h2b4	2.918	1557.661	326.027	4095	4.587
Ctrl MO C-C	Clone- Clone	h2b4	2.918	1663.725	343.599	4095	4.587
Ctrl MO C-C	Clone- Clone	h2b4	2.918	1708.613	402.813	4093.843	4.587
Ctrl MO C-C	Clone- Clone	h2b4	2.918	1620.461	283.435	3858.289	4.587
Ctrl MO C-C	Clone- Clone	h2b4	2.918	1192.786	215.838	4095	4.587
Ctrl MO C-C	Clone- Clone
Ctrl MO C-C	Clone- Clone	h2b5	10.05	552.068	31.763	1711.96	16.254
Ctrl MO C-C	Clone- Clone	h2b5	10.05	997.493	37.721	4031.287	16.254
Ctrl MO C-C	Clone- Clone	h2b5	10.05	1055.877	64.769	4095	16.254
Ctrl MO C-C	Clone- Clone	h2b5	10.05	939.202	92.514	4095	16.254
Ctrl MO C-C	Clone- Clone	h2b5	10.05	900.474	93.634	4095	16.254
Ctrl MO C-C	Clone- Clone	h2b5	9.186	2081.514	344.01	4095	14.848
Ctrl MO C-C	Clone- Clone	h2b5	9.186	2204.906	297.379	4095	14.848
Ctrl MO C-C	Clone- Clone	h2b5	9.186	1962.149	202.383	4095	14.848
Ctrl MO C-C	Clone- Clone	h2b5	9.186	1591.034	123.329	4095	14.848
Ctrl MO C-C	Clone- Clone
Ctrl MO C-C	Clone- Clone	h2b6	6.916	1142.492	95.851	3120.564	11.158
Ctrl MO C-C	Clone- Clone	h2b6	6.916	1241.899	257.651	4095	11.158
Ctrl MO C-C	Clone- Clone	h2b6	6.916	1651.774	281.148	4095	11.158
Ctrl MO C-C	Clone- Clone	h2b6	6.916	1695.348	177.711	4095	11.158
Ctrl MO C-C	Clone- Clone	h2b6	6.916	1565.44	149.885	4095	11.158
Ctrl MO C-C	Clone- Clone	h2b6	6.916	1341.635	223.704	4095	11.158
Ctrl MO C-C	Clone- Clone	h2b6	6.916	958.108	123.096	3414.213	11.158
Ctrl MO C-C	Clone- Clone
Ctrl MO C-C	Clone- Clone	h2b7	7.727	988.969	79.94	2911.72	12.473
Ctrl MO C-C	Clone- Clone	h2b7	7.727	1078.848	132.82	3277.378	12.473
Ctrl MO C-C	Clone- Clone	h2b7	7.727	966.334	118.701	4095	12.473
Ctrl MO C-C	Clone- Clone	h2b7	7.727	847.41	91.393	4095	12.473
Ctrl MO C-C	Clone- Clone	h2b7	7.727	775.533	139.533	4084.697	12.473
Ctrl MO C-C	Clone- Clone	h2b7	7.727	819.092	161.418	3918.789	12.473
Ctrl MO C-C	Clone- Clone	h2b7	7.727	1081.008	190.193	4084.155	12.473
Ctrl MO C-C	Clone- Clone
Ctrl MO C-C	Clone- Clone	h2b8	8.7	832.343	69.27	2597.725	14.057
Ctrl MO C-C	Clone- Clone	h2b8	8.7	1228.783	132.415	4095	14.057
Ctrl MO C-C	Clone- Clone	h2b8	8.7	1200.496	225.668	4095	14.057
Ctrl MO C-C	Clone- Clone	h2b8	8.7	1286.662	192.958	4095	14.057
Ctrl MO C-C	Clone- Clone	h2b8	8.7	1516.982	158.314	4095	14.057
Ctrl MO C-C	Clone- Clone	h2b8	8.7	1793.084	170.431	4095	14.057
Ctrl MO C-C	Clone- Clone	h2b8	8.7	1868.975	193.229	4095	14.057
Ctrl MO C-C	Clone- Clone	h2b8	8.7	1738.085	136.856	4095	14.057
Ctrl MO C-C	Clone- Clone	h2b8	8.7	1647.517	82.681	4095	14.057
Ctrl MO C-C	Clone- Clone	h2b8	8.7	1501.882	40.001	4095	14.057
Ctrl MO C-C	Clone- Clone	h3b1	17.453	472.128	28.766	2243.942	28.291
Ctrl MO C-C	Clone- Clone	h3b1	17.453	693.591	56.089	4094.67	28.291
Ctrl MO C-C	Clone- Clone	h3b1	17.453	850.913	35.126	4095	28.291
Ctrl MO C-C	Clone- Clone	h3b1	17.453	962.635	78.554	4095	28.291
Ctrl MO C-C	Clone- Clone	h3b1	17.453	595.154	39.335	4095	28.291
Ctrl MO C-C	Clone- Clone
Ctrl MO C-C	Clone- Clone	h3b2	12.914	543.54	24.315	2311.314	20.91
Ctrl MO C-C	Clone- Clone	h3b2	12.914	681.559	62.185	3731.874	20.91
Ctrl MO C-C	Clone- Clone	h3b2	12.914	774.447	103.37	4023.274	20.91
Ctrl MO C-C	Clone- Clone	h3b2	12.914	1005.925	116.444	4095	20.91
Ctrl MO C-C	Clone- Clone	h3b2	12.914	1254.768	109.892	4095	20.91
Ctrl MO C-C	Clone- Clone
Ctrl MO C-C	Clone- Clone	h3b3	8.916	1075.395	102.392	4093.719	14.409
Ctrl MO C-C	Clone- Clone	h3b3	8.916	1157.164	127.099	4095	14.409
Ctrl MO C-C	Clone- Clone	h3b3	8.916	1476.446	116.269	4095	14.409
Ctrl MO C-C	Clone- Clone	h3b3	8.916	2152.561	232.714	4095	14.409
Ctrl MO C-C	Clone- Clone	h3b3	8.916	1975.685	296.185	4095	14.409
Ctrl MO C-C	Clone- Clone
Ctrl MO C-C	Clone- Clone	h3b4	11.671	899.888	64.047	3275.569	18.889
Ctrl MO C-C	Clone- Clone	h3b4	11.671	1167.57	102.037	4095	18.889
Ctrl MO C-C	Clone- Clone	h3b4	11.671	1175.884	216.404	4095	18.889
Ctrl MO C-C	Clone- Clone	h3b4	11.671	1363.118	172.204	4095	18.889
Ctrl MO C-C	Clone- Clone	h3b4	11.671	1889.307	168.455	4095	18.889
Ctrl MO C-C	Clone- Clone	h3b4	11.671	1282.459	216.35	4092.781	18.889
Ctrl MO C-C	Clone- Clone	h3b4	11.671	946.586	174.595	4095	18.889
Ctrl MO C-C	Clone- Clone
Ctrl MO C-C	Clone- Clone	h3b5	10.537	1134.294	146.231	3067.914	17.045
Ctrl MO C-C	Clone- Clone	h3b5	10.537	1518.469	260.411	3953.317	17.045
Ctrl MO C-C	Clone- Clone	h3b5	10.537	1825.347	431.672	4095	17.045
Ctrl MO C-C	Clone- Clone	h3b5	10.537	2335.871	531.271	4095	17.045
Ctrl MO C-C	Clone- Clone	h3b5	10.537	2245.188	525.103	4095	17.045
Ctrl MO C-C	Clone- Clone	h4b1	7.781	581.102	38.54	1998.914	12.564
Ctrl MO C-C	Clone- Clone	h4b1	7.781	1225.765	42.752	4066.8	12.564
Ctrl MO C-C	Clone- Clone	h4b1	7.781	1239.302	42.071	4095	12.564
Ctrl MO C-C	Clone- Clone	h4b1	7.781	1154.934	32.617	4095	12.564
Ctrl MO C-C	Clone- Clone	h4b1	7.943	1527.019	182.261	4095	12.827
Ctrl MO C-C	Clone- Clone	h4b1	7.943	1622.089	163.146	4095	12.827
Ctrl MO C-C	Clone- Clone	h4b1	7.943	1545.161	215.682	4095	12.827
Ctrl MO C-C	Clone- Clone	h4b1	7.943	1421.462	196.527	4095	12.827
Ctrl MO C-C	Clone- Clone	h4b1	7.943	1459.758	172.194	4095	12.827
Ctrl MO C-C	Clone- Clone	h4b1	7.943	1456.351	134.263	4095	12.827
Ctrl MO C-C	Clone- Clone	h4b1	7.349	2031.857	473.505	4095	11.861
Ctrl MO C-C	Clone- Clone	h4b1	7.349	1806.872	297.65	4095	11.861
Ctrl MO C-C	Clone- Clone	h4b1	7.349	1284.954	173.654	4095	11.861
Ctrl MO C-C	Clone- Clone
Ctrl MO C-C	Clone- Clone	h4b2	5.511	1109.32	71.119	3684.247	8.866
Ctrl MO C-C	Clone- Clone	h4b2	5.511	1663.1	25.78	4095	8.866
Ctrl MO C-C	Clone- Clone	h4b2	5.511	1618.935	89.526	4095	8.866
Ctrl MO C-C	Clone- Clone	h4b2	5.511	1551.435	108.292	4095	8.866
Ctrl MO C-C	Clone- Clone	h4b2	5.511	1373.433	51.644	4095	8.866
Ctrl MO C-C	Clone- Clone	h4b2	5.511	1093.224	134.634	4095	8.866
Ctrl MO C-C	Clone- Clone	h4b2	5.511	1150.853	102.109	4095	8.866
Ctrl MO C-C	Clone- Clone	h4b2	5.836	2763.143	403.883	4095	9.4
Ctrl MO C-C	Clone- Clone	h4b2	5.836	2742.855	538.037	4095	9.4
Ctrl MO C-C	Clone- Clone	h4b2	5.836	2226.831	533.708	4095	9.4
Ctrl MO C-C	Clone- Clone
Ctrl MO C-C	Clone- Clone	h4b3	7.403	2132.18	374.44	4095	11.949
Ctrl MO C-C	Clone- Clone	h4b3	7.403	2302.801	359.548	4095	11.949
Ctrl MO C-C	Clone- Clone	h4b3	7.403	1729.589	186.809	4095	11.949
Ctrl MO C-C	Clone- Clone	h4b3	7.403	1438.843	233.45	4095	11.949
Ctrl MO C-C	Clone- Clone	h4b3	7.403	993.395	117.213	4095	11.949
Ctrl MO C-C	Clone- Clone
Ctrl MO C-C	Clone- Clone
Ctrl MO C-C	Clone- Clone	h4b1	16.264	524.561	17.55	1908.882	26.358
Ctrl MO C-C	Clone- Clone	h4b1	16.264	973.747	47.713	3954.088	26.358
Ctrl MO C-C	Clone- Clone	h4b1	16.264	933.712	58.439	4095	26.358
Ctrl MO C-C	Clone- Clone	h4b1	16.264	883.624	78.126	4095	26.358
Ctrl MO C-C	Clone- Clone	h4b1	16.264	905.127	61.18	4095	26.358
Ctrl MO C-C	Clone- Clone	h4b1	16.264	931.656	41.795	4095	26.358
Ctrl MO C-C	Clone- Clone	h4b1	16.264	899.802	32.945	4095	26.358
Ctrl MO C-C	Clone- Clone	h4b1	16.156	1690.254	198.941	4095	26.182
Ctrl MO C-C	Clone- Clone	h4b1	16.156	1672.469	264.341	4095	26.182
Ctrl MO C-C	Clone- Clone	h4b1	16.156	1820.228	288.37	4095	26.182
Ctrl MO C-C	Clone- Clone	h4b1	16.156	2019.077	373.524	4095	26.182
Ctrl MO C-C	Clone- Clone	h4b1	16.156	1581.582	255.787	4095	26.182
Ctrl MO C-C	Clone- Clone
Ctrl MO C-C	Clone- Clone	h4b2	5.566	762.45	88.514	3130.24	8.962
Ctrl MO C-C	Clone- Clone	h4b2	5.566	1387.018	213.334	4095	8.962
Ctrl MO C-C	Clone- Clone	h4b2	5.566	1429.574	327.148	4095	8.962
Ctrl MO C-C	Clone- Clone	h4b2	5.566	1459.283	232.07	4095	8.962
Ctrl MO C-C	Clone- Clone	h4b2	5.566	1294.006	154.719	4095	8.962
Ctrl MO C-C	Clone- Clone	h4b2	5.566	940.51	174.121	3063.516	8.962
Ctrl MO C-C	Clone- Clone	h4b2	5.566	818.401	221.857	2449.753	8.962
Ctrl MO C-C	Clone- Clone	h4b2	5.674	2224.86	238.959	4095	9.137
Ctrl MO C-C	Clone- Clone	h4b2	5.674	2281.223	346.584	4095	9.137
Ctrl MO C-C	Clone- Clone	h4b2	5.674	2096.859	255.709	4095	9.137
Ctrl MO C-C	Clone- Clone	h4b2	5.674	1678.544	214.76	4095	9.137
Ctrl MO C-C	Clone- Clone
Ctrl MO C-C	Clone- Clone	h4b3	4.755	804.585	74.865	4023.286	7.644
Ctrl MO C-C	Clone- Clone	h4b3	4.755	1280.091	134.182	4095	7.644
Ctrl MO C-C	Clone- Clone	h4b3	4.755	1347.106	91.362	4095	7.644
Ctrl MO C-C	Clone- Clone	h4b3	4.755	1495.954	288.006	4095	7.644
Ctrl MO C-C	Clone- Clone	h4b3	4.755	1697.77	285.899	4095	7.644
Ctrl MO C-C	Clone- Clone	h4b3	4.755	1704.854	178.526	4095	7.644
Ctrl MO C-C	Clone- Clone	h4b3	4.755	1691.761	391.513	4095	7.644
Ctrl MO C-C	Clone- Clone	h4b3	4.755	1683.838	503.127	4095	7.644
Ctrl MO C-C	Clone- Clone	h4b3	4.755	1623.884	489.46	4095	7.644
Ctrl MO C-C	Clone- Clone	h4b3	4.755	1587.564	355.605	4095	7.644
Ctrl MO C-C	Clone- Clone
Ctrl MO C-C	Clone- Clone	h4b4	12.968	866.137	59.771	3842.005	20.998
Ctrl MO C-C	Clone- Clone	h4b4	12.968	1386.414	184.199	4095	20.998
Ctrl MO C-C	Clone- Clone	h4b4	12.968	1535.076	202.264	4095	20.998
Ctrl MO C-C	Clone- Clone	h4b4	12.968	1728.694	83.064	4095	20.998
Ctrl MO C-C	Clone- Clone	h4b4	12.968	1892.491	141.856	4095	20.998
Ctrl MO C-C	Clone- Clone	h4b4	12.968	1943.205	216.602	4095	20.998
Ctrl MO C-C	Clone- Clone	h4b4	12.968	1640.16	205.013	4095	20.998
Ctrl MO C-C	Clone- Clone	h4b4	12.968	1407.327	230.897	4095	20.998
Ctrl MO C-C	Clone- Clone
Ctrl MO C-C	Clone- Clone	h4b5	6.538	1117.251	10.978	4095	10.543
Ctrl MO C-C	Clone- Clone	h4b5	6.538	1467.912	83.591	4095	10.543
Ctrl MO C-C	Clone- Clone	h4b5	6.538	1441.035	110.518	4095	10.543
Ctrl MO C-C	Clone- Clone	h4b5	6.538	1307.104	122.819	4095	10.543
Ctrl MO C-C	Clone- Clone	h4b5	6.538	1133.883	104.018	4095	10.543
Ctrl MO C-C	Clone- Clone	h4b5	6.538	761.325	112.756	3239.124	10.543
Ctrl MO C-C	Clone- Clone	h4b5	6.538	642.756	134.631	2001.729	10.543
Ctrl MO C-C	Clone- Clone
Ctrl MO C-C	Clone- Clone	h4b6	9.402	1585.191	196.748	4095	15.2
Ctrl MO C-C	Clone- Clone	h4b6	9.402	1614.017	240.34	4095	15.2
Ctrl MO C-C	Clone- Clone	h4b6	9.402	1622.684	170.652	4095	15.2
Ctrl MO C-C	Clone- Clone	h4b6	9.564	2089.311	285.249	4095	15.463
Ctrl MO C-C	Clone- Clone	h4b6	9.564	2131.705	228.205	4095	15.463
Ctrl MO C-C	Clone- Clone	h4b6	9.564	1969.264	338.487	4095	15.463
Ctrl MO C-C	Clone- Clone	h4b6	9.564	1828.535	356.993	4095	15.463
Ctrl MO C-C	Clone- Clone	h4b6	9.564	1604.548	282.546	4095	15.463
Ctrl MO C-C	Clone- Clone
Ctrl MO C-C	Clone- Clone	h4b7	9.618	1432.515	155.97	4095	15.551
Ctrl MO C-C	Clone- Clone	h4b7	9.618	1478.359	148.362	4095	15.551
Ctrl MO C-C	Clone- Clone	h4b7	9.618	1471.201	137.717	4095	15.551
Ctrl MO C-C	Clone- Clone	h4b7	9.618	1427.075	134.357	4095	15.551
Ctrl MO C-C	Clone- Clone	h4b7	9.618	1249.733	59.224	4095	15.551
Ctrl MO C-C	Clone- Clone	h4b7	9.618	1086.002	31.108	4095	15.551
Ctrl MO C-C	Clone- Clone
Ctrl MO C-C	Clone- Clone	h4b8	9.726	836.268	21.609	2986.791	15.727
Ctrl MO C-C	Clone- Clone	h4b8	9.726	1285.701	38.297	4095	15.727
Ctrl MO C-C	Clone- Clone	h4b8	9.726	1162.586	66.336	4095	15.727
Ctrl MO C-C	Clone- Clone	h4b8	9.726	1298.263	110.519	4095	15.727
Ctrl MO C-C	Clone- Clone	h4b8	9.726	1420.313	110.701	4095	15.727
Ctrl MO C-C	Clone- Clone	h4b8	9.726	1614.983	222.122	4095	15.727
Ctrl MO C-C	Clone- Clone	h4b8	9.726	1983.763	310.637	4095	15.727
Ctrl MO C-C	Clone- Clone	h4b8	9.726	1907.597	273.72	4095	15.727
Ctrl MO C-C	Clone- Clone
Ctrl MO C-C	Clone- Clone	h4b9	7.241	811.982	19.523	4095	11.685
Ctrl MO C-C	Clone- Clone	h4b9	7.241	1146.849	39.438	4095	11.685
Ctrl MO C-C	Clone- Clone	h4b9	7.241	1050.499	55.893	4095	11.685
Ctrl MO C-C	Clone- Clone	h4b9	7.241	910.71	112.331	4095	11.685
Ctrl MO C-C	Clone- Clone	h4b9	7.241	802.995	83.788	4095	11.685
Ctrl MO C-C	Clone- Clone
Ctrl MO C-C	Clone- Clone	h4b10	7.781	628.633	24.144	2389.594	12.564
Ctrl MO C-C	Clone- Clone	h4b10	7.781	1139.937	44.405	4095	12.564
Ctrl MO C-C	Clone- Clone	h4b10	7.781	1380.827	44.343	4095	12.564
Ctrl MO C-C	Clone- Clone	h4b10	7.781	1461.097	148.04	4095	12.564
Ctrl MO C-C	Clone- Clone	h4b10	7.781	1562.72	217.656	4095	12.564
Ctrl MO C-C	Clone- Clone	h4b10	7.781	1810.163	163.965	4095	12.564
Ctrl MO C-C	Clone- Clone	h4b10	7.781	2430.666	168.723	4095	12.564
Ctrl MO C-C	Clone- Clone	h4b10	7.781	2598.193	309.085	4095	12.564
Ctrl MO C-C	Clone- Clone	h4b10	7.781	2402.966	411.939	4095	12.564
Ctrl MO C-C	Clone- Clone
Ctrl MO C-C	Clone- Clone	h4b11	3.782	743.029	130.398	2606.603	6.062
Ctrl MO C-C	Clone- Clone	h4b11	3.782	1355.102	143.632	3881.003	6.062
Ctrl MO C-C	Clone- Clone	h4b11	3.782	1798.468	348.025	4095	6.062
Ctrl MO C-C	Clone- Clone	h4b11	3.782	1905.753	509.086	4095	6.062
Ctrl MO C-C	Clone- Clone	h4b11	3.782	2000.161	381.58	4095	6.062
Ctrl MO C-C	Clone- Clone	h4b11	3.782	2191.215	430.293	4095	6.062
Ctrl MO C-C	Clone- Clone	h4b11	3.782	2449.643	565.732	4095	6.062
Ctrl MO C-C	Clone- Clone	h4b11	3.782	2393.045	565.095	4095	6.062
Ctrl MO C-C	Clone- Clone	h4b11	3.782	2118.007	477.664	4095	6.062
Ctrl MO C-C	Clone- Clone
Ctrl MO C-C	Clone- Clone	h4b12	10.537	1090.153	93.953	3718.542	17.045
Ctrl MO C-C	Clone- Clone	h4b12	10.537	1635.647	138.403	4095	17.045
Ctrl MO C-C	Clone- Clone	h4b12	10.537	1907.248	206.011	4095	17.045
Ctrl MO C-C	Clone- Clone	h4b12	10.537	2044.788	271.622	4095	17.045
Ctrl MO C-C	Clone- Clone	h4b12	10.537	2247.297	317.586	4095	17.045
Ctrl MO C-C	Clone- Clone	h4b12	10.537	2293.375	261.446	4095	17.045
Ctrl MO C-C	Clone- Clone	h4b12	10.537	2276.232	330.93	4095	17.045
Ctrl MO C-C	Clone- Clone	h4b12	10.537	2182.973	343.699	4095	17.045
Ctrl MO C-C	Clone- Clone
Ctrl MO C-C	Clone- Clone	h4b13	8.483	953.157	17.748	3059.489	13.706
Ctrl MO C-C	Clone- Clone	h4b13	8.483	1019.835	112.605	4093.971	13.706
Ctrl MO C-C	Clone- Clone	h4b13	8.483	931.179	51.408	4095	13.706
Ctrl MO C-C	Clone- Clone	h4b13	8.483	923.544	89.705	4095	13.706
Ctrl MO C-C	Clone- Clone	h4b13	8.483	1012.56	100.794	4003.176	13.706
Ctrl MO C-C	Clone- Clone	h4b13	8.483	1287.686	277.192	4095	13.706
Ctrl MO C-C	Clone- Clone	h4b13	8.483	1537.682	244.15	4095	13.706
Ctrl MO C-C	Clone- Clone
Ctrl MO C-C	Clone- Clone	h4b14	11.617	1032.841	27.257	3356.172	18.797
Ctrl MO C-C	Clone- Clone	h4b14	11.617	1427.104	82.553	4095	18.797
Ctrl MO C-C	Clone- Clone	h4b14	11.617	1374.76	130.012	4095	18.797
Ctrl MO C-C	Clone- Clone	h4b14	11.617	1441.602	148.095	4095	18.797
Ctrl MO C-C	Clone- Clone	h4b14	11.617	1629.457	273.647	4095	18.797
Ctrl MO C-C	Clone- Clone	h4b14	11.617	1975.863	204.134	4095	18.797
Ctrl MO C-C	Clone- Clone	h4b14	11.617	2067.648	185.865	4095	18.797
Ctrl MO C-C	Clone- Clone	h4b14	11.563	2359.979	164.023	4095	18.71
Ctrl MO C-C	Clone- Clone	h4b14	11.563	2419.926	250.389	4095	18.71
Ctrl MO C-C	Clone- Clone	h4b14	11.563	2252.903	500.873	4095	18.71
Ctrl MO C-C	Clone- Clone	h4b14	11.563	1679.792	239.547	4095	18.71
Ctrl MO C-C	Clone- Clone	h4b14	11.563	854.569	132.994	4093.848	18.71
Ctrl MO C-C	Clone- Clone
Ctrl MO C-C	Clone- Clone	h4b15	10.212	1161.161	106.99	4045.191	16.517
Ctrl MO C-C	Clone- Clone	h4b15	10.212	1373.852	100.28	4095	16.517
Ctrl MO C-C	Clone- Clone	h4b15	10.212	1436.49	114.424	4095	16.517
Ctrl MO C-C	Clone- Clone	h4b15	10.212	1496.752	130.804	4095	16.517
Ctrl MO C-C	Clone- Clone	h4b15	10.212	1520.484	174.982	4095	16.517
Ctrl MO C-C	Clone- Clone	h4b15	10.212	1770.575	127.873	4095	16.517
Ctrl MO C-C	Clone- Clone	h4b15	10.212	1883.894	135.791	4095	16.517
Ctrl MO C-C	Clone- Clone	h4b15	10.212	1983.06	127.731	4095	16.517
Ctrl MO C-C	Clone- Clone	h4b15	10.212	1929.255	119.918	4095	16.517
Ctrl MO C-C	Clone- Clone	h4b15	10.212	1494.376	136.485	4095	16.517
Ctrl MO C-C	Clone- Clone
Ctrl MO C-C	Clone- Clone	h4b16	8.267	1121.979	33.204	4071.978	13.355
Ctrl MO C-C	Clone- Clone	h4b16	8.267	1148.457	105.558	4095	13.355
Ctrl MO C-C	Clone- Clone	h4b16	8.267	979.883	47.92	4095	13.355
Ctrl MO C-C	Clone- Clone	h4b16	8.267	796.447	72.78	4095	13.355
Ctrl MO C-C	Clone- Clone	h4b16	8.267	733.602	82.705	4095	13.355
Ctrl MO C-C	Clone- Clone	h4b16	8.267	831.094	113.6	4095	13.355
Ctrl MO C-C	Clone- Clone	h4b16	8.267	873.559	93.074	4095	13.355
Ctrl MO C-C	Clone- Clone	h4b16	8.267	1090.155	104.875	4095	13.355
Ctrl MO C-C	Clone- Clone	h4b16	8.267	1508.849	156.564	4095	13.355
Ctrl MO C-C	Clone- Clone	h4b16	8.267	1459.373	197.389	4095	13.355
Ctrl MO C-C	Clone- Clone	h4b16	8.267	1015.967	209.815	4092.223	13.355
Ctrl MO N-C	Non Clone- Clone	h1b1	13.725	938.572	36.252	3280.721	22.228
Ctrl MO N-C	Non Clone- Clone	h1b1	13.725	952.565	47.25	4095	22.228
Ctrl MO N-C	Non Clone- Clone	h1b1	13.725	881.536	59.138	4095	22.228
Ctrl MO N-C	Non Clone- Clone	h1b1	13.725	800.703	88.448	4095	22.228
Ctrl MO N-C	Non Clone- Clone	h1b1	13.725	686.745	45.186	4095	22.228
Ctrl MO N-C	Non Clone- Clone	h1b1	13.725	618.639	62.996	4095	22.228
Ctrl MO N-C	Non Clone- Clone	h1b1	13.346	1755.305	246.883	4095	21.602
Ctrl MO N-C	Non Clone- Clone	h1b1	13.346	1480.499	139.275	4095	21.602
Ctrl MO N-C	Non Clone- Clone	h1b1	13.346	1137.346	70.137	4095	21.602
Ctrl MO N-C	Non Clone- Clone	h1b1	13.346	902.805	60.265	4002.146	21.602
Ctrl MO N-C	Non Clone- Clone
Ctrl MO N-C	Non Clone- Clone	h1b2	10.212	624.331	8.742	2749.62	16.517
Ctrl MO N-C	Non Clone- Clone	h1b2	10.212	744.932	0.878	3745.699	16.517
Ctrl MO N-C	Non Clone- Clone	h1b2	10.212	735.022	54.129	4095	16.517
Ctrl MO N-C	Non Clone- Clone	h1b2	10.212	745.006	69.927	4095	16.517
Ctrl MO N-C	Non Clone- Clone	h1b2	10.212	838.931	77.346	4095	16.517
Ctrl MO N-C	Non Clone- Clone	h1b2	10.212	860.395	102.021	4095	16.517
Ctrl MO N-C	Non Clone- Clone	h1b2	10.212	941.73	54.577	4095	16.517
Ctrl MO N-C	Non Clone- Clone	h1b2	10.212	1192.711	82.166	4095	16.517
Ctrl MO N-C	Non Clone- Clone	h1b2	10.212	1360.523	150.566	4095	16.517
Ctrl MO N-C	Non Clone- Clone
Ctrl MO N-C	Non Clone- Clone	h1b3	9.132	770.151	30.357	2892.852	14.708
Ctrl MO N-C	Non Clone- Clone	h1b3	9.132	880.179	30.073	3963.944	14.708
Ctrl MO N-C	Non Clone- Clone	h1b3	9.132	845.415	57.068	4095	14.708
Ctrl MO N-C	Non Clone- Clone	h1b3	9.132	811.679	86.793	4095	14.708
Ctrl MO N-C	Non Clone- Clone	h1b3	9.132	1002.573	109.313	4095	14.708
Ctrl MO N-C	Non Clone- Clone	h1b3	9.132	1179.062	166.887	4095	14.708
Ctrl MO N-C	Non Clone- Clone	h1b3	9.132	1379.478	115.032	4095	14.708
Ctrl MO N-C	Non Clone- Clone	h1b3	9.132	1564.409	247.471	4095	14.708
Ctrl MO N-C	Non Clone- Clone	h1b3	9.132	1332.598	227.067	4095	14.708
Ctrl MO N-C	Non Clone- Clone
Ctrl MO N-C	Non Clone- Clone	h1b4	11.239	705.554	34.155	2217.319	18.187
Ctrl MO N-C	Non Clone- Clone	h1b4	11.239	844.646	6.486	2708.135	18.187
Ctrl MO N-C	Non Clone- Clone	h1b4	11.239	793.712	39.839	2530.314	18.187
Ctrl MO N-C	Non Clone- Clone	h1b4	11.239	771.622	103.168	2676.32	18.187
Ctrl MO N-C	Non Clone- Clone	h1b4	11.239	1073.423	137.691	3963.187	18.187
Ctrl MO N-C	Non Clone- Clone	h1b4	11.239	1190.428	133.558	4095	18.187
Ctrl MO N-C	Non Clone- Clone	h1b4	11.239	1170.7	160.396	4095	18.187
Ctrl MO N-C	Non Clone- Clone	h1b4	11.239	1066.553	170.849	4045.352	18.187
Ctrl MO N-C	Non Clone- Clone	h1b4	11.239	1117.193	121.429	4095	18.187
Ctrl MO N-C	Non Clone- Clone
Ctrl MO N-C	Non Clone- Clone	h1b5	14.751	889.024	33.977	3765.942	23.897
Ctrl MO N-C	Non Clone- Clone	h1b5	14.751	959.974	22.629	4095	23.897
Ctrl MO N-C	Non Clone- Clone	h1b5	14.751	854.803	64.54	4095	23.897
Ctrl MO N-C	Non Clone- Clone	h1b5	14.751	868.229	93.811	4095	23.897
Ctrl MO N-C	Non Clone- Clone	h1b5	14.751	1177.494	124.255	4095	23.897
Ctrl MO N-C	Non Clone- Clone	h1b5	14.751	1266.83	65.158	4095	23.897
Ctrl MO N-C	Non Clone- Clone	h1b5	14.751	1247.639	80.819	4060.807	23.897
Ctrl MO N-C	Non Clone- Clone	h1b5	14.751	1139.915	195.201	4095	23.897
Ctrl MO N-C	Non Clone- Clone	h1b5	14.751	1030.927	75.046	4095	23.897
Ctrl MO N-C	Non Clone- Clone
Ctrl MO N-C	Non Clone- Clone	h1b6	8.321	488.31	5.486	3736.705	13.442
Ctrl MO N-C	Non Clone- Clone	h1b6	8.321	541.661	12.791	3722.064	13.442
Ctrl MO N-C	Non Clone- Clone	h1b6	8.321	628.34	32.854	3989.636	13.442
Ctrl MO N-C	Non Clone- Clone	h1b6	8.321	847.628	44.939	4095	13.442
Ctrl MO N-C	Non Clone- Clone	h1b6	8.321	1238.121	68.588	4017.568	13.442
Ctrl MO N-C	Non Clone- Clone	h1b6	8.321	1264.814	142.677	3870.18	13.442
Ctrl MO N-C	Non Clone- Clone	h1b6	8.321	1189.55	225.196	3835.543	13.442
Ctrl MO N-C	Non Clone- Clone	h1b6	8.321	1047.88	201.216	4074.17	13.442
Ctrl MO N-C	Non Clone- Clone
Ctrl MO N-C	Non Clone- Clone	h1b7	5.728	942.424	66.476	4083.727	9.225
Ctrl MO N-C	Non Clone- Clone	h1b7	5.728	925.215	104.968	4095	9.225
Ctrl MO N-C	Non Clone- Clone	h1b7	5.728	940.195	141.618	4095	9.225
Ctrl MO N-C	Non Clone- Clone	h1b7	5.728	1088.788	111.503	4095	9.225
Ctrl MO N-C	Non Clone- Clone	h1b7	5.728	1445.192	156.311	4095	9.225
Ctrl MO N-C	Non Clone- Clone	h1b7	5.728	1510.283	208.203	4095	9.225
Ctrl MO N-C	Non Clone- Clone	h1b7	5.728	1501.981	412.388	4095	9.225
Ctrl MO N-C	Non Clone- Clone	h1b7	5.728	1677.326	429.959	4095	9.225
Ctrl MO N-C	Non Clone- Clone	h1b7	5.728	1827.495	289.652	4095	9.225
Ctrl MO N-C	Non Clone- Clone
Ctrl MO N-C	Non Clone- Clone	h1b8	8.754	856.486	58.432	3036.885	14.145
Ctrl MO N-C	Non Clone- Clone	h1b8	8.754	992.699	82.695	3305.108	14.145
Ctrl MO N-C	Non Clone- Clone	h1b8	8.754	1159.749	179.524	4095	14.145
Ctrl MO N-C	Non Clone- Clone	h1b8	8.754	1430.074	155.29	4095	14.145
Ctrl MO N-C	Non Clone- Clone	h1b8	8.754	1694.531	296.901	4095	14.145
Ctrl MO N-C	Non Clone- Clone	h1b8	8.754	1669.206	322.455	4095	14.145
Ctrl MO N-C	Non Clone- Clone	h1b8	8.754	1585.702	243.52	4095	14.145
Ctrl MO N-C	Non Clone- Clone	h1b8	8.754	1544.419	174.982	4095	14.145
Ctrl MO N-C	Non Clone- Clone	h1b8	8.754	1328.309	67.482	4095	14.145
Ctrl MO N-C	Non Clone- Clone	h1b8	8.754	1059.597	61.432	4095	14.145
Ctrl MO N-C	Non Clone- Clone
Ctrl MO N-C	Non Clone- Clone	h1b9	5.241	937.801	89.57	3150.877	8.434
Ctrl MO N-C	Non Clone- Clone	h1b9	5.241	1017.167	97.946	4095	8.434
Ctrl MO N-C	Non Clone- Clone	h1b9	5.241	990.084	114.844	4095	8.434
Ctrl MO N-C	Non Clone- Clone	h1b9	5.241	1120.56	206.592	4095	8.434
Ctrl MO N-C	Non Clone- Clone	h1b9	5.241	1316.414	178.863	4095	8.434
Ctrl MO N-C	Non Clone- Clone	h1b9	5.241	1401.617	225.081	4095	8.434
Ctrl MO N-C	Non Clone- Clone	h1b9	5.241	1502.111	179.341	4095	8.434
Ctrl MO N-C	Non Clone- Clone	h1b9	5.241	1356.407	205.392	4006.681	8.434
Ctrl MO N-C	Non Clone- Clone	h1b9	5.241	891.543	122.801	4095	8.434
Ctrl MO N-C	Non Clone- Clone	h1b9	5.241	716.56	70.454	3668.134	8.434
Ctrl MO N-C	Non Clone- Clone
Ctrl MO N-C	Non Clone- Clone	h1b10	13.455	912.019	96.029	4095	21.789
Ctrl MO N-C	Non Clone- Clone	h1b10	13.455	982.833	121.657	4095	21.789
Ctrl MO N-C	Non Clone- Clone	h1b10	13.455	1294.128	187.376	4095	21.789
Ctrl MO N-C	Non Clone- Clone	h1b10	13.455	1672.114	278.444	4095	21.789
Ctrl MO N-C	Non Clone- Clone	h1b10	13.455	1622.354	173.355	4095	21.789
Ctrl MO N-C	Non Clone- Clone	h1b10	13.455	1451.876	178.215	4095	21.789
Ctrl MO N-C	Non Clone- Clone	h1b10	13.455	1258.529	145.92	4095	21.789
Ctrl MO N-C	Non Clone- Clone	h1b10	13.455	1176.691	155.453	4095	21.789
Ctrl MO N-C	Non Clone- Clone	h1b10	13.455	1236.936	80.863	4095	21.789
Ctrl MO N-C	Non Clone- Clone
Ctrl MO N-C	Non Clone- Clone	h1b11	10.807	722.511	13.39	4048.004	17.484
Ctrl MO N-C	Non Clone- Clone	h1b11	10.807	840.752	10.273	4095	17.484
Ctrl MO N-C	Non Clone- Clone	h1b11	10.807	814.982	58.438	4095	17.484
Ctrl MO N-C	Non Clone- Clone	h1b11	10.807	818.711	50.141	4095	17.484
Ctrl MO N-C	Non Clone- Clone	h1b11	10.807	1052.102	91.539	4095	17.484
Ctrl MO N-C	Non Clone- Clone	h1b11	10.807	1161.528	146.299	4095	17.484
Ctrl MO N-C	Non Clone- Clone	h1b11	10.807	1221.941	98.955	4095	17.484
Ctrl MO N-C	Non Clone- Clone	h1b11	10.807	1343.565	144.966	4093.888	17.484
Ctrl MO N-C	Non Clone- Clone	h1b11	10.807	1464.465	162.255	4095	17.484
Ctrl MO N-C	Non Clone- Clone	h1b11	10.807	1325.953	129.627	4095	17.484
Ctrl MO N-C	Non Clone- Clone	h2b1	5.025	763.749	50.248	3322.72	8.083
Ctrl MO N-C	Non Clone- Clone	h2b1	5.025	1109.308	109.974	4095	8.083
Ctrl MO N-C	Non Clone- Clone	h2b1	5.025	1357.36	63.557	4095	8.083
Ctrl MO N-C	Non Clone- Clone	h2b1	5.025	1626.496	119.296	4095	8.083
Ctrl MO N-C	Non Clone- Clone	h2b1	5.025	1832.705	229.074	4095	8.083
Ctrl MO N-C	Non Clone- Clone	h2b1	5.025	1908.768	203.269	4095	8.083
Ctrl MO N-C	Non Clone- Clone	h2b1	5.025	1609.884	220.431	4095	8.083
Ctrl MO N-C	Non Clone- Clone
Ctrl MO N-C	Non Clone- Clone	h2b2	8.916	621.327	15.652	3199.418	14.409
Ctrl MO N-C	Non Clone- Clone	h2b2	8.916	833.442	54.038	4095	14.409
Ctrl MO N-C	Non Clone- Clone	h2b2	8.916	1014.581	104.455	4095	14.409
Ctrl MO N-C	Non Clone- Clone	h2b2	8.916	1204.22	136.151	4095	14.409
Ctrl MO N-C	Non Clone- Clone	h2b2	8.916	1433.303	144.604	4095	14.409
Ctrl MO N-C	Non Clone- Clone	h2b2	8.916	1486.485	165.728	4095	14.409
Ctrl MO N-C	Non Clone- Clone	h2b2	8.916	1366.671	203.846	4034.161	14.409
Ctrl MO N-C	Non Clone- Clone	h2b2	8.916	1029.3	218.805	4095	14.409
Ctrl MO N-C	Non Clone- Clone
Ctrl MO N-C	Non Clone- Clone	h2b3	5.728	271.833	14.779	1086.844	9.225
Ctrl MO N-C	Non Clone- Clone	h2b3	5.728	612.205	23.125	3897.765	9.225
Ctrl MO N-C	Non Clone- Clone	h2b3	5.728	745.751	34.824	4095	9.225
Ctrl MO N-C	Non Clone- Clone	h2b3	5.728	776.122	83.084	4095	9.225
Ctrl MO N-C	Non Clone- Clone	h2b3	5.728	775.299	89.507	4095	9.225
Ctrl MO N-C	Non Clone- Clone	h2b3	5.728	815.685	88.39	3587.793	9.225
Ctrl MO N-C	Non Clone- Clone	h2b3	5.728	756.335	89.234	2697.929	9.225
Ctrl MO N-C	Non Clone- Clone	h2b3	5.728	446.671	34.019	2630.423	9.225
Ctrl MO N-C	Non Clone- Clone
Ctrl MO N-C	Non Clone- Clone	h2b4	7.241	511.7	30.368	1898.203	11.685
Ctrl MO N-C	Non Clone- Clone	h2b4	7.241	748.466	69.15	4093.77	11.685
Ctrl MO N-C	Non Clone- Clone	h2b4	7.241	739.839	88.02	4095	11.685
Ctrl MO N-C	Non Clone- Clone	h2b4	6.97	1216.789	115.564	4088.32	11.246
Ctrl MO N-C	Non Clone- Clone	h2b4	6.97	1168.941	154.771	3924.857	11.246
Ctrl MO N-C	Non Clone- Clone	h2b4	6.97	1173.995	163.22	4095	11.246
Ctrl MO N-C	Non Clone- Clone	h2b4	6.97	1045.807	60.671	4095	11.246
Ctrl MO N-C	Non Clone- Clone	h2b4	6.97	644.291	10.982	3844.498	11.246
Ctrl MO N-C	Non Clone- Clone	h2b4	6.97	524.692	3.484	4095	11.246
Ctrl MO N-C	Non Clone- Clone
Ctrl MO N-C	Non Clone- Clone	h2b5	10.158	642.041	11.558	2717.849	16.43
Ctrl MO N-C	Non Clone- Clone	h2b5	10.158	695.015	23.656	4091.628	16.43
Ctrl MO N-C	Non Clone- Clone	h2b5	10.158	826.069	47.756	4094.113	16.43
Ctrl MO N-C	Non Clone- Clone	h2b5	10.158	985.725	37.352	3982.154	16.43
Ctrl MO N-C	Non Clone- Clone	h2b5	10.158	1113.197	70.728	4095	16.43
Ctrl MO N-C	Non Clone- Clone	h2b5	10.158	927.309	4.275	4095	16.43
Ctrl MO N-C	Non Clone- Clone	h2b5	10.158	554.617	12.605	3558.749	16.43
Ctrl MO N-C	Non Clone- Clone
Ctrl MO N-C	Non Clone- Clone	h2b6	9.294	1204.895	64.697	4095	15.024
Ctrl MO N-C	Non Clone- Clone	h2b6	9.294	1306.89	55.897	4095	15.024
Ctrl MO N-C	Non Clone- Clone	h2b6	9.294	1200.849	118.441	4095	15.024
Ctrl MO N-C	Non Clone- Clone	h2b6	9.294	1006.109	98.887	4095	15.024
Ctrl MO N-C	Non Clone- Clone	h2b6	9.294	873.931	96.294	4046.942	15.024
Ctrl MO N-C	Non Clone- Clone	h2b6	9.294	910.334	112.582	3586.397	15.024
Ctrl MO N-C	Non Clone- Clone	h2b6	9.294	1259.434	125.53	4095	15.024
Ctrl MO N-C	Non Clone- Clone	h2b6	9.294	1275.921	194.531	4095	15.024
Ctrl MO N-C	Non Clone- Clone
Ctrl MO N-C	Non Clone- Clone	h2b7	7.673	515.743	3.686	2175.475	12.388
Ctrl MO N-C	Non Clone- Clone	h2b7	7.673	924.073	9.148	4095	12.388
Ctrl MO N-C	Non Clone- Clone	h2b7	7.673	1032.336	5.493	4095	12.388
Ctrl MO N-C	Non Clone- Clone	h2b7	7.673	1267.187	13.81	4095	12.388
Ctrl MO N-C	Non Clone- Clone	h2b7	7.673	1290.142	18.352	4095	12.388
Ctrl MO N-C	Non Clone- Clone	h2b7	7.673	1102.235	31.381	4095	12.388
Ctrl MO N-C	Non Clone- Clone	h2b7	7.673	827.367	52.197	3661.739	12.388
Ctrl MO N-C	Non Clone- Clone	h2b7	7.673	664.802	76.148	3948.097	12.388
Ctrl MO N-C	Non Clone- Clone	h3b1	12.374	998.829	41.859	3039.803	20.028
Ctrl MO N-C	Non Clone- Clone	h3b1	12.374	1182.109	79.711	4073.912	20.028
Ctrl MO N-C	Non Clone- Clone	h3b1	12.374	1292.717	140.99	4092.527	20.028
Ctrl MO N-C	Non Clone- Clone	h3b1	12.374	1544.647	153.153	4095	20.028
Ctrl MO N-C	Non Clone- Clone	h3b1	12.374	1568.044	176.868	4095	20.028
Ctrl MO N-C	Non Clone- Clone	h3b1	12.374	1131.874	135.542	4030.633	20.028
Ctrl MO N-C	Non Clone- Clone
Ctrl MO N-C	Non Clone- Clone	h3b2	8.051	668.34	26.738	3281.911	13.003
Ctrl MO N-C	Non Clone- Clone	h3b2	8.051	847.053	72.328	4094.045	13.003
Ctrl MO N-C	Non Clone- Clone	h3b2	8.051	1034.39	89.237	4095	13.003
Ctrl MO N-C	Non Clone- Clone	h3b2	8.051	1313.726	124.08	4095	13.003
Ctrl MO N-C	Non Clone- Clone	h3b2	8.051	1139.836	77.071	3885.996	13.003
Ctrl MO N-C	Non Clone- Clone
Ctrl MO N-C	Non Clone- Clone	h3b3	17.885	925.789	30.763	3251.026	28.993
Ctrl MO N-C	Non Clone- Clone	h3b3	17.885	1162.755	85.314	3802.174	28.993
Ctrl MO N-C	Non Clone- Clone	h3b3	17.885	1174.681	112.44	4058.881	28.993
Ctrl MO N-C	Non Clone- Clone	h3b3	17.885	1309.349	86.463	4095	28.993
Ctrl MO N-C	Non Clone- Clone	h3b3	17.885	1582.988	206.034	4095	28.993
Ctrl MO N-C	Non Clone- Clone	h3b3	17.885	1166.12	85.27	4095	28.993
Ctrl MO N-C	Non Clone- Clone
Ctrl MO N-C	Non Clone- Clone	h3b4	15.886	450.429	0	1414.522	25.743
Ctrl MO N-C	Non Clone- Clone	h3b4	15.886	681.989	0	3536.615	25.743
Ctrl MO N-C	Non Clone- Clone	h3b4	15.886	760.847	0	4086.716	25.743
Ctrl MO N-C	Non Clone- Clone	h3b4	15.886	970.44	0	4082.139	25.743
Ctrl MO N-C	Non Clone- Clone	h3b4	15.886	1302.615	0	4095	25.743
Ctrl MO N-C	Non Clone- Clone	h3b4	15.886	956.255	0	3814.956	25.743
Ctrl MO N-C	Non Clone- Clone	h3b4	15.886	745.226	0	3914.396	25.743
Ctrl MO N-C	Non Clone- Clone
Ctrl MO N-C	Non Clone- Clone	h3b5	10.483	867.362	71.409	4095	16.957
Ctrl MO N-C	Non Clone- Clone	h3b5	10.483	975.527	77.239	4095	16.957
Ctrl MO N-C	Non Clone- Clone	h3b5	10.483	1069.204	147.183	4095	16.957
Ctrl MO N-C	Non Clone- Clone	h3b5	10.483	1451.324	198.676	4095	16.957
Ctrl MO N-C	Non Clone- Clone	h3b5	10.483	1362.584	225.356	4095	16.957
Ctrl MO N-C	Non Clone- Clone	h3b5	10.483	1125.99	213.588	4095	16.957
Ctrl MO N-C	Non Clone- Clone
Ctrl MO N-C	Non Clone- Clone	h3b6	7.565	971.81	152.423	3646.467	12.212
Ctrl MO N-C	Non Clone- Clone	h3b6	7.565	1371.327	324.324	4095	12.212
Ctrl MO N-C	Non Clone- Clone	h3b6	7.565	1568.282	364.967	4095	12.212
Ctrl MO N-C	Non Clone- Clone	h3b6	7.565	1982.968	408.326	4095	12.212
Ctrl MO N-C	Non Clone- Clone	h3b6	7.565	2146.806	318.917	4095	12.212
Ctrl MO N-C	Non Clone- Clone	h3b6	7.565	1467.541	149.52	3970.555	12.212
Ctrl MO N-C	Non Clone- Clone	h3b6	7.565	1108.603	215.988	4095	12.212
Ctrl MO N-C	Non Clone- Clone
Ctrl MO N-C	Non Clone- Clone	h3b7	12.482	1198.638	96.159	4095	20.208
Ctrl MO N-C	Non Clone- Clone	h3b7	12.482	1250.275	136.766	4095	20.208
Ctrl MO N-C	Non Clone- Clone	h3b7	12.482	1552.983	148.356	4095	20.208
Ctrl MO N-C	Non Clone- Clone	h3b7	12.482	1884.523	213.485	4095	20.208
Ctrl MO N-C	Non Clone- Clone	h3b7	12.482	1277.957	270.983	4095	20.208
Ctrl MO N-C	Non Clone- Clone	h3b7	12.482	959.522	146.752	4095	20.208
Ctrl MO N-C	Non Clone- Clone
Ctrl MO N-C	Non Clone- Clone	h3b8	10.05	542.535	66.915	3032.348	16.254
Ctrl MO N-C	Non Clone- Clone	h3b8	10.05	816.207	146.99	4019.975	16.254
Ctrl MO N-C	Non Clone- Clone	h3b8	10.05	1344.27	249.104	4090.254	16.254
Ctrl MO N-C	Non Clone- Clone	h3b8	10.05	1580.371	159.018	3995.488	16.254
Ctrl MO N-C	Non Clone- Clone	h3b8	10.05	906.317	99.992	4095	16.254
Ctrl MO N-C	Non Clone- Clone
Ctrl MO N-C	Non Clone- Clone	h3b9	17.939	563.398	55.149	2329.557	29.081
Ctrl MO N-C	Non Clone- Clone	h3b9	17.939	780.958	93.123	3103.671	29.081
Ctrl MO N-C	Non Clone- Clone	h3b9	17.939	892.997	96.98	4048.315	29.081
Ctrl MO N-C	Non Clone- Clone	h3b9	17.939	1077.773	98.396	4095	29.081
Ctrl MO N-C	Non Clone- Clone	h3b9	17.939	1029.426	79.705	4095	29.081
Ctrl MO N-C	Non Clone- Clone	h3b9	17.939	694.488	41.565	4095	29.081
Ctrl MO N-C	Non Clone- Clone
Ctrl MO N-C	Non Clone- Clone	h3b10	20.155	993.956	34.288	4094.944	32.683
Ctrl MO N-C	Non Clone- Clone	h3b10	20.155	1133.215	75.589	4095	32.683
Ctrl MO N-C	Non Clone- Clone	h3b10	20.155	1299.954	89.174	4095	32.683
Ctrl MO N-C	Non Clone- Clone	h3b10	20.155	1558.996	149.436	4095	32.683
Ctrl MO N-C	Non Clone- Clone	h3b10	20.155	1456.668	145.69	4095	32.683
Ctrl MO N-C	Non Clone- Clone	h3b10	20.155	1054.625	100.838	4095	32.683
Ctrl MO N-C	Non Clone- Clone
Ctrl MO N-C	Non Clone- Clone	h3b11	7.835	665.885	59.271	2806.597	12.652
Ctrl MO N-C	Non Clone- Clone	h3b11	7.835	743.929	70.132	2449.748	12.652
Ctrl MO N-C	Non Clone- Clone	h3b11	7.835	878.236	75.167	4088.402	12.652
Ctrl MO N-C	Non Clone- Clone	h3b11	7.835	794.241	49.286	4071.939	12.652
Ctrl MO N-C	Non Clone- Clone	h3b11	7.835	517.811	24.544	3027.283	12.652
Ctrl MO N-C	Non Clone- Clone
Ctrl MO N-C	Non Clone- Clone	h3b12	11.833	629.929	31.806	2040.891	19.153
Ctrl MO N-C	Non Clone- Clone	h3b12	11.833	805.452	6.386	3962.495	19.153
Ctrl MO N-C	Non Clone- Clone	h3b12	11.833	773.75	36.541	4057.608	19.153
Ctrl MO N-C	Non Clone- Clone	h3b12	11.833	871.591	33.099	4095	19.153
Ctrl MO N-C	Non Clone- Clone	h3b12	11.833	1057.863	101.01	4029.458	19.153
Ctrl MO N-C	Non Clone- Clone	h3b12	11.833	843.871	81.397	3954.079	19.153
Ctrl MO N-C	Non Clone- Clone
Ctrl MO N-C	Non Clone- Clone	h3b13	6.052	995.011	83.247	3624.359	9.752
Ctrl MO N-C	Non Clone- Clone	h3b13	6.052	1036.152	185.785	4081.946	9.752
Ctrl MO N-C	Non Clone- Clone	h3b13	6.052	1333.925	293.853	4083.287	9.752
Ctrl MO N-C	Non Clone- Clone	h3b13	6.052	1518.315	226.769	3989.133	9.752
Ctrl MO N-C	Non Clone- Clone	h3b13	6.052	785.813	167.408	4049.27	9.752
Ctrl MO N-C	Non Clone- Clone
Ctrl MO N-C	Non Clone- Clone	h3b14	6.052	365.652	57.334	1923.993	9.752
Ctrl MO N-C	Non Clone- Clone	h3b14	6.052	619.787	119.407	2627.78	9.752
Ctrl MO N-C	Non Clone- Clone	h3b14	6.052	803.248	191.337	2912.853	9.752
Ctrl MO N-C	Non Clone- Clone	h3b14	6.052	1131.415	196.175	4078.122	9.752
Ctrl MO N-C	Non Clone- Clone	h3b14	6.052	1389.36	69.782	4095	9.752
Ctrl MO N-C	Non Clone- Clone	h3b14	6.052	1119.251	69.426	4093.184	9.752
Ctrl MO N-N	Non Clone- Non Clone	h1b1	3.944	795.72	80.617	4095	6.326
Ctrl MO N-N	Non Clone- Non Clone	h1b1	3.944	977.966	141.75	4095	6.326
Ctrl MO N-N	Non Clone- Non Clone	h1b1	3.944	1507.96	138.185	4095	6.326
Ctrl MO N-N	Non Clone- Non Clone	h1b1	3.944	1582.611	117.43	4095	6.326
Ctrl MO N-N	Non Clone- Non Clone	h1b1	3.944	1439.79	83.24	4095	6.326
Ctrl MO N-N	Non Clone- Non Clone	h1b1	3.944	1140.667	208.423	4079.917	6.326
Ctrl MO N-N	Non Clone- Non Clone	h1b1	3.944	582.036	88.711	1656.013	6.326
Ctrl MO N-N	Non Clone- Non Clone
Ctrl MO N-N	Non Clone- Non Clone	h1b2	9.402	632.341	16.229	3364.548	15.2
Ctrl MO N-N	Non Clone- Non Clone	h1b2	9.402	741.4	22.063	4095	15.2
Ctrl MO N-N	Non Clone- Non Clone	h1b2	9.402	850.275	58.041	4095	15.2
Ctrl MO N-N	Non Clone- Non Clone	h1b2	9.402	1209.614	74.594	4095	15.2
Ctrl MO N-N	Non Clone- Non Clone	h1b2	9.402	1563.177	204.342	4095	15.2
Ctrl MO N-N	Non Clone- Non Clone	h1b2	9.402	1571.182	220.527	4095	15.2
Ctrl MO N-N	Non Clone- Non Clone	h1b2	9.402	1497.994	236.302	4095	15.2
Ctrl MO N-N	Non Clone- Non Clone	h1b2	9.402	1439.666	234.355	4095	15.2
Ctrl MO N-N	Non Clone- Non Clone	h1b2	9.402	1260.371	245.485	4055.694	15.2
Ctrl MO N-N	Non Clone- Non Clone
Ctrl MO N-N	Non Clone- Non Clone	h1b3	10.212	612.826	21.54	2651.712	16.517
Ctrl MO N-N	Non Clone- Non Clone	h1b3	10.212	678.038	29.633	3057.966	16.517
Ctrl MO N-N	Non Clone- Non Clone	h1b3	10.212	715.253	89.804	4095	16.517
Ctrl MO N-N	Non Clone- Non Clone	h1b3	10.212	942.508	207.073	4095	16.517
Ctrl MO N-N	Non Clone- Non Clone	h1b3	10.212	1348.469	170.585	4095	16.517
Ctrl MO N-N	Non Clone- Non Clone	h1b3	10.212	1487.581	200.541	4095	16.517
Ctrl MO N-N	Non Clone- Non Clone	h1b3	10.212	1651.728	237.077	4095	16.517
Ctrl MO N-N	Non Clone- Non Clone	h1b3	10.212	1753.431	333.493	4095	16.517
Ctrl MO N-N	Non Clone- Non Clone	h1b3	10.212	1643.03	315.537	4095	16.517
Ctrl MO N-N	Non Clone- Non Clone	h1b3	10.212	1552.911	194.354	4095	16.517
Ctrl MO N-N	Non Clone- Non Clone
Ctrl MO N-N	Non Clone- Non Clone	h1b4	11.509	590.205	20.525	3347.302	18.626
Ctrl MO N-N	Non Clone- Non Clone	h1b4	11.509	596.322	29.866	4095	18.626
Ctrl MO N-N	Non Clone- Non Clone	h1b4	11.509	648.223	35.957	4095	18.626
Ctrl MO N-N	Non Clone- Non Clone	h1b4	11.509	780.029	29.088	4095	18.626
Ctrl MO N-N	Non Clone- Non Clone	h1b4	11.509	1032.871	61.289	4095	18.626
Ctrl MO N-N	Non Clone- Non Clone	h1b4	11.509	1096.93	66.815	4095	18.626
Ctrl MO N-N	Non Clone- Non Clone	h1b4	11.509	1136.566	80.01	4095	18.626
Ctrl MO N-N	Non Clone- Non Clone	h1b4	11.509	1285.263	169.082	4018.282	18.626
Ctrl MO N-N	Non Clone- Non Clone	h1b4	11.509	856.904	61.907	3700.574	18.626
Ctrl MO N-N	Non Clone- Non Clone	h1b4	11.509	768.718	46.499	4094.258	18.626
Ctrl MO N-N	Non Clone- Non Clone
Ctrl MO N-N	Non Clone- Non Clone	h1b5	12.05	613.451	1.88	2680.117	19.504
Ctrl MO N-N	Non Clone- Non Clone	h1b5	12.05	629.49	3.862	4015.295	19.504
Ctrl MO N-N	Non Clone- Non Clone	h1b5	12.05	566.296	9.386	4095	19.504
Ctrl MO N-N	Non Clone- Non Clone	h1b5	12.05	490.164	34.011	4095	19.504
Ctrl MO N-N	Non Clone- Non Clone	h1b5	12.05	442.561	11.965	4095	19.504
Ctrl MO N-N	Non Clone- Non Clone	h1b5	12.05	427.3	46.091	4066.908	19.504
Ctrl MO N-N	Non Clone- Non Clone	h1b5	10.05	1383.369	118.212	4095	16.254
Ctrl MO N-N	Non Clone- Non Clone	h1b5	10.05	1516.706	127.35	4095	16.254
Ctrl MO N-N	Non Clone- Non Clone	h1b5	10.05	1406.273	92.079	4095	16.254
Ctrl MO N-N	Non Clone- Non Clone
Ctrl MO N-N	Non Clone- Non Clone	h1b6	12.59	515.299	4.323	2230.094	20.383
Ctrl MO N-N	Non Clone- Non Clone	h1b6	12.59	452.618	7.377	3933.284	20.383
Ctrl MO N-N	Non Clone- Non Clone	h1b6	12.59	353.007	25.624	4079.458	20.383
Ctrl MO N-N	Non Clone- Non Clone	h1b6	12.59	402.032	7.35	2732.668	20.383
Ctrl MO N-N	Non Clone- Non Clone	h1b6	12.59	649.248	4.429	4095	20.383
Ctrl MO N-N	Non Clone- Non Clone	h1b6	12.59	622.835	17.702	4028.293	20.383
Ctrl MO N-N	Non Clone- Non Clone	h1b6	12.59	543.189	16.048	4093.499	20.383
Ctrl MO N-N	Non Clone- Non Clone	h2b1	9.078	668.279	45.209	2338.994	14.672
Ctrl MO N-N	Non Clone- Non Clone	h2b1	9.078	807.353	48.539	4086.345	14.672
Ctrl MO N-N	Non Clone- Non Clone	h2b1	9.078	918.036	72.004	4095	14.672
Ctrl MO N-N	Non Clone- Non Clone	h2b1	9.078	1060.815	41.067	4095	14.672
Ctrl MO N-N	Non Clone- Non Clone	h2b1	9.078	1262.922	118.057	4095	14.672
Ctrl MO N-N	Non Clone- Non Clone	h2b1	9.078	1587.849	204.323	4095	14.672
Ctrl MO N-N	Non Clone- Non Clone	h2b1	9.078	1646.479	125.792	4095	14.672
Ctrl MO N-N	Non Clone- Non Clone	h2b1	9.078	828.607	98.041	3771.585	14.672
Ctrl MO N-N	Non Clone- Non Clone
Ctrl MO N-N	Non Clone- Non Clone	h2b2	9.078	668.279	45.209	2338.994	14.672
Ctrl MO N-N	Non Clone- Non Clone	h2b2	9.078	807.353	48.539	4086.345	14.672
Ctrl MO N-N	Non Clone- Non Clone	h2b2	9.078	918.036	72.004	4095	14.672
Ctrl MO N-N	Non Clone- Non Clone	h2b2	9.078	1060.815	41.067	4095	14.672
Ctrl MO N-N	Non Clone- Non Clone	h2b2	9.078	1262.922	118.057	4095	14.672
Ctrl MO N-N	Non Clone- Non Clone	h2b2	9.078	1587.849	204.323	4095	14.672
Ctrl MO N-N	Non Clone- Non Clone	h2b2	9.078	1646.479	125.792	4095	14.672
Ctrl MO N-N	Non Clone- Non Clone	h2b2	9.078	828.607	98.041	3771.585	14.672
Ctrl MO N-N	Non Clone- Non Clone	h2b2	9.078	569.035	83.489	4095	14.672
Ctrl MO N-N	Non Clone- Non Clone
Ctrl MO N-N	Non Clone- Non Clone	h2b3	6.43	656.057	40.819	2310.281	10.367
Ctrl MO N-N	Non Clone- Non Clone	h2b3	6.43	1152.763	145.083	4028.789	10.367
Ctrl MO N-N	Non Clone- Non Clone	h2b3	6.43	1011.844	169.363	4095	10.367
Ctrl MO N-N	Non Clone- Non Clone	h2b3	6.43	1063.198	262.728	4095	10.367
Ctrl MO N-N	Non Clone- Non Clone	h2b3	6.43	1222.911	307.233	4095	10.367
Ctrl MO N-N	Non Clone- Non Clone	h2b3	6.43	1546.819	289.22	4095	10.367
Ctrl MO N-N	Non Clone- Non Clone	h2b3	6.43	1891.755	320.072	4095	10.367
Ctrl MO N-N	Non Clone- Non Clone	h2b3	6.43	1612.138	303.403	4082.377	10.367
Ctrl MO N-N	Non Clone- Non Clone
Ctrl MO N-N	Non Clone- Non Clone	h2b4	9.618	666.404	37.257	2149.354	15.551
Ctrl MO N-N	Non Clone- Non Clone	h2b4	9.618	1219.585	62.517	3826.215	15.551
Ctrl MO N-N	Non Clone- Non Clone	h2b4	9.618	1152.745	105.388	4095	15.551
Ctrl MO N-N	Non Clone- Non Clone	h2b4	9.618	1276.455	184.009	4095	15.551
Ctrl MO N-N	Non Clone- Non Clone	h2b4	9.618	1526.545	198.948	4095	15.551
Ctrl MO N-N	Non Clone- Non Clone	h2b4	9.618	1865.236	225.354	4095	15.551
Ctrl MO N-N	Non Clone- Non Clone	h2b4	9.618	2213.973	203.287	4095	15.551
Ctrl MO N-N	Non Clone- Non Clone	h2b4	9.618	2135.384	369.894	4095	15.551
Ctrl MO N-N	Non Clone- Non Clone	h2b4	9.618	1408.278	168.647	4095	15.551
Ctrl MO N-N	Non Clone- Non Clone
Ctrl MO N-N	Non Clone- Non Clone	h2b5	7.457	300.842	22.295	920.552	12.037
Ctrl MO N-N	Non Clone- Non Clone	h2b5	7.457	512.065	15.693	1967.171	12.037
Ctrl MO N-N	Non Clone- Non Clone	h2b5	7.457	708.921	26.402	3733.354	12.037
Ctrl MO N-N	Non Clone- Non Clone	h2b5	7.457	855.961	68.662	4095	12.037
Ctrl MO N-N	Non Clone- Non Clone	h2b5	7.457	974.222	133.575	4095	12.037
Ctrl MO N-N	Non Clone- Non Clone	h2b5	7.457	1209.361	136.937	4095	12.037
Ctrl MO N-N	Non Clone- Non Clone	h2b5	7.457	1615.509	174.161	4095	12.037
Ctrl MO N-N	Non Clone- Non Clone	h2b5	7.457	1523.597	143.882	4040.546	12.037
Ctrl MO N-N	Non Clone- Non Clone	h2b5	7.457	636.649	97.789	2248.976	12.037
Ctrl MO N-N	Non Clone- Non Clone
Ctrl MO N-N	Non Clone- Non Clone	h2b6	12.536	369.383	15.688	1307.418	20.295
Ctrl MO N-N	Non Clone- Non Clone	h2b6	12.536	790.633	23.074	3110.126	20.295
Ctrl MO N-N	Non Clone- Non Clone	h2b6	12.428	1017.981	37.605	3775.258	20.12
Ctrl MO N-N	Non Clone- Non Clone	h2b6	12.428	1241.557	76.786	4095	20.12
Ctrl MO N-N	Non Clone- Non Clone	h2b6	12.428	1477.968	58.598	4095	20.12
Ctrl MO N-N	Non Clone- Non Clone	h2b6	12.428	1715.705	137.192	4095	20.12
Ctrl MO N-N	Non Clone- Non Clone	h2b6	12.428	1780.882	155.557	4095	20.12
Ctrl MO N-N	Non Clone- Non Clone	h2b6	12.428	1287.234	119.921	4095	20.12
Ctrl MO N-N	Non Clone- Non Clone	h2b6	12.428	667.841	96.061	3244.095	20.12
Ctrl MO N-N	Non Clone- Non Clone	h3b1	11.833	1105.586	102.117	4095	19.153
Ctrl MO N-N	Non Clone- Non Clone	h3b1	11.833	1266.793	160.22	4095	19.153
Ctrl MO N-N	Non Clone- Non Clone	h3b1	11.833	1707.828	169.278	4095	19.153
Ctrl MO N-N	Non Clone- Non Clone	h3b1	11.833	2255.586	235.315	4095	19.153
Ctrl MO N-N	Non Clone- Non Clone	h3b1	11.833	1577.29	194.13	4095	19.153
Ctrl MO N-N	Non Clone- Non Clone	h3b1	11.833	1124.117	162.411	4095	19.153
Ctrl MO N-N	Non Clone- Non Clone
Ctrl MO N-N	Non Clone- Non Clone	h3b2	9.672	1064.871	71.444	3407.769	15.639
Ctrl MO N-N	Non Clone- Non Clone	h3b2	9.672	1458.272	99.701	4094.484	15.639
Ctrl MO N-N	Non Clone- Non Clone	h3b2	9.672	1679.347	169.879	4095	15.639
Ctrl MO N-N	Non Clone- Non Clone	h3b2	9.672	1668.499	148.956	4095	15.639
Ctrl MO N-N	Non Clone- Non Clone	h3b2	9.672	1408.86	125.982	4095	15.639
Ctrl MO N-N	Non Clone- Non Clone
Ctrl MO N-N	Non Clone- Non Clone	h3b3	7.673	359.805	38.067	1388.811	12.388
Ctrl MO N-N	Non Clone- Non Clone	h3b3	7.673	786.11	119.808	4095	12.388
Ctrl MO N-N	Non Clone- Non Clone	h3b3	7.673	1185.784	344.508	4095	12.388
Ctrl MO N-N	Non Clone- Non Clone	h3b3	7.673	1614.468	399.698	4095	12.388
Ctrl MO N-N	Non Clone- Non Clone	h3b3	7.673	2080.915	464.86	4095	12.388
Ctrl MO N-N	Non Clone- Non Clone	h3b3	7.673	1666.151	385.837	4095	12.388
Ctrl MO N-N	Non Clone- Non Clone	h4b1	18.101	1122.097	26.296	4021.08	29.345
Ctrl MO N-N	Non Clone- Non Clone	h4b1	18.101	1156.645	15.35	4095	29.345
Ctrl MO N-N	Non Clone- Non Clone	h4b1	18.101	1058.571	26.025	4095	29.345
Ctrl MO N-N	Non Clone- Non Clone	h4b1	18.101	1004.613	32.061	4095	29.345
Ctrl MO N-N	Non Clone- Non Clone	h4b1	18.101	996.061	21.92	4095	29.345
Ctrl MO N-N	Non Clone- Non Clone	h4b1	18.101	850.272	29.539	4095	29.345
Ctrl MO N-N	Non Clone- Non Clone	h4b1	17.561	1669.745	70.893	4095	28.466
Ctrl MO N-N	Non Clone- Non Clone	h4b1	17.561	1513.495	90.36	4095	28.466
Ctrl MO N-N	Non Clone- Non Clone	h4b1	17.561	1394.738	193.788	4095	28.466
Ctrl MO N-N	Non Clone- Non Clone	h4b1	17.561	1598.661	219.192	4095	28.466
Ctrl MO N-N	Non Clone- Non Clone	h4b1	17.561	1947.849	158.018	4095	28.466
Ctrl MO N-N	Non Clone- Non Clone	h4b1	17.561	2038.279	333.723	4095	28.466
Ctrl MO N-N	Non Clone- Non Clone
Ctrl MO N-N	Non Clone- Non Clone	h4b2	10.591	1070.568	13.033	4095	17.132
Ctrl MO N-N	Non Clone- Non Clone	h4b2	10.591	973.022	14.824	4095	17.132
Ctrl MO N-N	Non Clone- Non Clone	h4b2	10.591	942.108	45.208	4095	17.132
Ctrl MO N-N	Non Clone- Non Clone	h4b2	10.591	963.305	25.383	4095	17.132
Ctrl MO N-N	Non Clone- Non Clone	h4b2	10.591	1025.001	49.358	4095	17.132
Ctrl MO N-N	Non Clone- Non Clone	h4b2	10.591	1100.328	37.221	4083.889	17.132
Ctrl MO N-N	Non Clone- Non Clone	h4b2	10.591	1143.311	39.033	4094.253	17.132
Ctrl MO N-N	Non Clone- Non Clone	h4b2	10.591	1139.205	37.463	4092.86	17.132
Ctrl MO N-N	Non Clone- Non Clone	h4b2	10.591	949.539	52.571	4095	17.132
Ctrl MO N-N	Non Clone- Non Clone	h4b2	10.591	680.873	67.203	4095	17.132
Ctrl MO N-N	Non Clone- Non Clone
Ctrl MO N-N	Non Clone- Non Clone	h4b3	7.133	1350.758	99.272	4095	11.509
Ctrl MO N-N	Non Clone- Non Clone	h4b3	7.133	1405.68	151.158	4095	11.509
Ctrl MO N-N	Non Clone- Non Clone	h4b3	7.133	1436.438	152.071	4095	11.509
Ctrl MO N-N	Non Clone- Non Clone	h4b3	7.133	1604.523	159.195	4095	11.509
Ctrl MO N-N	Non Clone- Non Clone	h4b3	7.133	1590.139	129.028	4095	11.509
Ctrl MO N-N	Non Clone- Non Clone	h4b3	7.133	1285.014	170.927	4082.381	11.509
Ctrl MO N-N	Non Clone- Non Clone	h4b3	7.133	1189.162	147.804	4008.76	11.509
Ctrl MO N-N	Non Clone- Non Clone	h4b3	7.133	1197.196	186.909	4032.421	11.509
Ctrl MO N-N	Non Clone- Non Clone	h4b3	7.133	1203.532	196.446	4075.172	11.509
Ctrl MO N-N	Non Clone- Non Clone
Ctrl MO N-N	Non Clone- Non Clone	h4b4	7.133	908.926	30.232	4019.656	11.493
Ctrl MO N-N	Non Clone- Non Clone	h4b4	7.133	1367.365	73.466	4095	11.493
Ctrl MO N-N	Non Clone- Non Clone	h4b4	7.133	1296.463	37.989	4095	11.493
Ctrl MO N-N	Non Clone- Non Clone	h4b4	7.133	1236.567	79.893	4095	11.493
Ctrl MO N-N	Non Clone- Non Clone	h4b4	7.133	1177.734	86.099	4095	11.493
Ctrl MO N-N	Non Clone- Non Clone	h4b4	7.133	1371.17	126.412	4095	11.493
Ctrl MO N-N	Non Clone- Non Clone	h4b4	7.133	1513.61	153.084	4095	11.493
Ctrl MO N-N	Non Clone- Non Clone	h4b4	7.133	1344.844	202.374	4095	11.493
Ctrl MO N-N	Non Clone- Non Clone	h4b4	7.133	1185.334	247.852	4075.411	11.493
Ctrl MO N-N	Non Clone- Non Clone
Ctrl MO N-N	Non Clone- Non Clone	h4b5	9.294	1200.007	175.116	4095	15.024
Ctrl MO N-N	Non Clone- Non Clone	h4b5	9.294	1157.182	203.331	4083.296	15.024
Ctrl MO N-N	Non Clone- Non Clone	h4b5	9.294	1193.751	200.371	4095	15.024
Ctrl MO N-N	Non Clone- Non Clone	h4b5	9.294	1279.761	157.447	4095	15.024
Ctrl MO N-N	Non Clone- Non Clone	h4b5	9.294	1410.012	106.874	4095	15.024
Ctrl MO N-N	Non Clone- Non Clone	h4b5	9.294	1401.788	126.681	4095	15.024
Ctrl MO N-N	Non Clone- Non Clone	h4b5	9.294	1339.746	170.062	4095	15.024
Ctrl MO N-N	Non Clone- Non Clone	h4b5	9.294	1292.508	197.33	4095	15.024
Ctrl MO N-N	Non Clone- Non Clone
Ctrl MO N-N	Non Clone- Non Clone	h4b6	12.32	1478.141	81.569	4095	19.944
Ctrl MO N-N	Non Clone- Non Clone	h4b6	12.32	1408.193	200.07	4095	19.944
Ctrl MO N-N	Non Clone- Non Clone	h4b6	12.32	1384.505	154.062	4095	19.944
Ctrl MO N-N	Non Clone- Non Clone	h4b6	12.32	1330.838	122.409	4095	19.944
Ctrl MO N-N	Non Clone- Non Clone	h4b6	12.32	1290.701	120.862	4095	19.944
Ctrl MO N-N	Non Clone- Non Clone	h4b6	12.32	1256.362	77.306	4095	19.944
Ctrl MO N-N	Non Clone- Non Clone	h4b6	12.32	1219.324	99.743	4095	19.944
Ctrl MO N-N	Non Clone- Non Clone	h4b6	12.32	1291.07	146.678	4095	19.944
Ctrl MO N-N	Non Clone- Non Clone
Ctrl MO N-N	Non Clone- Non Clone	h4b7	10.104	787.522	80.325	2871.105	16.342
Ctrl MO N-N	Non Clone- Non Clone	h4b7	10.104	1249.243	107.996	3971.348	16.342
Ctrl MO N-N	Non Clone- Non Clone	h4b7	10.104	1424.375	116.794	4095	16.342
Ctrl MO N-N	Non Clone- Non Clone	h4b7	10.104	1447.432	197.051	4095	16.342
Ctrl MO N-N	Non Clone- Non Clone	h4b7	10.104	1368.619	174.474	4095	16.342
Ctrl MO N-N	Non Clone- Non Clone	h4b7	9.726	2103.739	360.846	4095	15.724
Ctrl MO N-N	Non Clone- Non Clone	h4b7	9.726	2472.723	569.519	4095	15.724
Ctrl MO N-N	Non Clone- Non Clone	h4b7	9.726	2678.259	358.142	4095	15.724
Ctrl MO N-N	Non Clone- Non Clone	h4b7	9.726	2498.327	294.413	4095	15.724
Ctrl MO N-N	Non Clone- Non Clone
Ctrl MO N-N	Non Clone- Non Clone	h4b8	9.726	1470.301	40.258	4095	15.726
Ctrl MO N-N	Non Clone- Non Clone	h4b8	9.726	1346.433	148.196	4095	15.726
Ctrl MO N-N	Non Clone- Non Clone	h4b8	9.726	1262.114	103.342	4095	15.726
Ctrl MO N-N	Non Clone- Non Clone	h4b8	9.726	1233.075	147.414	4095	15.726
Ctrl MO N-N	Non Clone- Non Clone	h4b8	9.726	1222.343	176.491	4095	15.726
Ctrl MO N-N	Non Clone- Non Clone	h4b8	9.726	1324.266	162.003	4095	15.726
Ctrl MO N-N	Non Clone- Non Clone	h4b8	9.726	1406.198	113.835	4095	15.726
Ctrl MO N-N	Non Clone- Non Clone	h4b8	9.726	1330.021	63.495	4095	15.726
Ecad MO C-C	Clone- Clone	h1b1	9.348	185.656	13.705	1547.166	15.112
Ecad MO C-C	Clone- Clone	h1b1	9.348	320.366	15.931	2714.691	15.112
Ecad MO C-C	Clone- Clone	h1b1	9.348	465.575	39.156	2190.772	15.112
Ecad MO C-C	Clone- Clone	h1b1	9.348	599.484	61.396	2341.444	15.112
Ecad MO C-C	Clone- Clone	h1b1	9.348	777.662	141.87	2948.974	15.112
Ecad MO C-C	Clone- Clone	h1b1	9.348	1056.42	94.983	3174.363	15.112
Ecad MO C-C	Clone- Clone
Ecad MO C-C	Clone- Clone	h1b2	6.43	237.337	15.33	1670.317	10.367
Ecad MO C-C	Clone- Clone	h1b2	6.43	304.182	36.972	3181.557	10.367
Ecad MO C-C	Clone- Clone	h1b2	6.43	374.501	44.586	4031.196	10.367
Ecad MO C-C	Clone- Clone	h1b2	6.43	555.244	51.175	2803.016	10.367
Ecad MO C-C	Clone- Clone	h1b2	6.43	849.406	92.542	4095	10.367
Ecad MO C-C	Clone- Clone	h1b2	6.43	1018.681	121.685	4095	10.367
Ecad MO C-C	Clone- Clone
Ecad MO C-C	Clone- Clone	h1b3	7.619	341.619	7.027	1409.433	12.3
Ecad MO C-C	Clone- Clone	h1b3	7.619	533.5	50.349	1933.985	12.3
Ecad MO C-C	Clone- Clone	h1b3	7.619	718.92	60.896	2540.152	12.3
Ecad MO C-C	Clone- Clone	h1b3	7.619	914.372	63.769	4095	12.3
Ecad MO C-C	Clone- Clone
Ecad MO C-C	Clone- Clone	h1b4	4.053	130.687	9.736	881.468	6.502
Ecad MO C-C	Clone- Clone	h1b4	4.053	183.646	11.081	589.698	6.502
Ecad MO C-C	Clone- Clone	h1b4	4.053	253.96	35.761	1585.715	6.502
Ecad MO C-C	Clone- Clone	h1b4	4.053	270.534	38.102	1420.594	6.502
Ecad MO C-C	Clone- Clone	h1b4	4.053	276.01	39.359	1382.859	6.502
Ecad MO C-C	Clone- Clone
Ecad MO C-C	Clone- Clone	h1b5	6.97	259.884	20.858	1505.666	11.246
Ecad MO C-C	Clone- Clone	h1b5	6.97	465.615	79.028	4095	11.246
Ecad MO C-C	Clone- Clone	h1b5	6.97	541.346	51.724	4095	11.246
Ecad MO C-C	Clone- Clone	h1b5	6.97	558.901	91.852	3048.994	11.246
Ecad MO C-C	Clone- Clone	h1b5	6.97	704.916	102.042	4095	11.246
Ecad MO C-C	Clone- Clone
Ecad MO C-C	Clone- Clone	h1b6	5.403	210.166	11.319	1165.568	8.698
Ecad MO C-C	Clone- Clone	h1b6	5.403	253.006	19.57	1398.075	8.698
Ecad MO C-C	Clone- Clone	h1b6	5.403	322.934	20.617	1939.28	8.698
Ecad MO C-C	Clone- Clone	h1b6	5.403	360.036	39.223	2153.189	8.698
Ecad MO C-C	Clone- Clone	h1b6	5.403	443.43	62.689	1902.722	8.698
Ecad MO C-C	Clone- Clone	h2b1	21.019	146.983	0.793	748.254	34.089
Ecad MO C-C	Clone- Clone	h2b1	21.019	193.688	0.083	861.017	34.089
Ecad MO C-C	Clone- Clone	h2b1	21.019	260.543	0.716	1955.991	34.089
Ecad MO C-C	Clone- Clone	h2b1	21.019	273.942	8.431	2576.857	34.089
Ecad MO C-C	Clone- Clone	h2b1	21.019	327.47	12.547	3495.992	34.089
Ecad MO C-C	Clone- Clone	h2b1	21.019	359.138	8.291	4095	34.089
Ecad MO C-C	Clone- Clone	h2b1	21.019	382.842	9.497	4095	34.089
Ecad MO C-C	Clone- Clone	h2b1	21.019	394.275	8.149	4095	34.089
Ecad MO C-C	Clone- Clone
Ecad MO C-C	Clone- Clone	h2b2	19.182	101.245	0	555.501	31.102
Ecad MO C-C	Clone- Clone	h2b2	19.182	131.333	3.295	624.581	31.102
Ecad MO C-C	Clone- Clone	h2b2	19.182	171.61	1.31	733.088	31.102
Ecad MO C-C	Clone- Clone	h2b2	19.182	177.109	2.832	821.267	31.102
Ecad MO C-C	Clone- Clone	h2b2	19.182	198.949	4.228	1843.346	31.102
Ecad MO C-C	Clone- Clone	h2b2	19.182	205.315	5.157	2925.721	31.102
Ecad MO C-C	Clone- Clone	h2b2	19.182	210.503	0.791	2393.883	31.102
Ecad MO C-C	Clone- Clone
Ecad MO C-C	Clone- Clone	h2b3	14.697	239.329	1.253	1966.661	23.81
Ecad MO C-C	Clone- Clone	h2b3	14.697	243.991	8.746	2212.31	23.81
Ecad MO C-C	Clone- Clone	h2b3	14.697	265.63	7.485	1841.881	23.81
Ecad MO C-C	Clone- Clone	h2b3	14.697	288.395	17.334	4073.402	23.81
Ecad MO C-C	Clone- Clone	h2b3	14.697	339.776	16.105	4095	23.81
Ecad MO C-C	Clone- Clone	h2b3	14.697	304.274	15.705	4095	23.81
Ecad MO C-C	Clone- Clone
Ecad MO C-C	Clone- Clone	h2b4	22.64	231.075	4.319	2371.115	36.725
Ecad MO C-C	Clone- Clone	h2b4	22.64	263.663	7.621	3655.842	36.725
Ecad MO C-C	Clone- Clone	h2b4	22.64	289.436	13.357	3017.284	36.725
Ecad MO C-C	Clone- Clone	h2b4	22.64	299.74	6.553	3463.635	36.725
Ecad MO C-C	Clone- Clone	h2b4	22.64	314.648	18.397	3249.166	36.725
Ecad MO C-C	Clone- Clone	h2b4	22.64	332.98	8.821	4021.025	36.725
Ecad MO C-C	Clone- Clone
Ecad MO C-C	Clone- Clone	h2b5	19.614	290.442	11.933	1329.009	31.805
Ecad MO C-C	Clone- Clone	h2b5	19.614	302.956	2.949	1354.279	31.805
Ecad MO C-C	Clone- Clone	h2b5	19.614	303.258	1.974	1675.572	31.805
Ecad MO C-C	Clone- Clone	h2b5	19.614	322.402	0.955	2838.243	31.805
Ecad MO C-C	Clone- Clone	h2b5	19.614	352.91	4.615	3359.763	31.805
Ecad MO C-C	Clone- Clone	h2b5	19.614	374.638	0.754	2851.628	31.805
Ecad MO C-C	Clone- Clone	h2b5	19.614	343.175	1.593	4094.164	31.805
Ecad MO C-C	Clone- Clone
Ecad MO C-C	Clone- Clone	h2b6	3.134	340.003	14.118	2338.252	5.008
Ecad MO C-C	Clone- Clone	h2b6	3.134	406.662	43.943	3755.362	5.008
Ecad MO C-C	Clone- Clone	h2b6	3.134	565.486	38.607	2581.594	5.008
Ecad MO C-C	Clone- Clone	h2b6	3.134	701.764	76.103	4021.642	5.008
Ecad MO C-C	Clone- Clone	h2b6	3.134	743.286	62.128	4078.31	5.008
Ecad MO C-C	Clone- Clone	h2b6	3.134	690.15	96.708	3959.5	5.008
Ecad MO C-C	Clone- Clone	h2b6	3.134	762.477	88.408	4095	5.008
Ecad MO C-C	Clone- Clone
Ecad MO C-C	Clone- Clone	h2b7	8.159	190.113	2.859	1006.642	13.179
Ecad MO C-C	Clone- Clone	h2b7	8.159	233.277	7.678	1260.666	13.179
Ecad MO C-C	Clone- Clone	h2b7	8.159	264.246	14.912	1388.472	13.179
Ecad MO C-C	Clone- Clone	h2b7	8.159	295.677	9.849	1443.126	13.179
Ecad MO C-C	Clone- Clone	h2b7	8.159	306.664	13.31	2755.272	13.179
Ecad MO C-C	Clone- Clone
Ecad MO C-C	Clone- Clone	h2b8	5.187	239.814	14.204	2564.704	8.347
Ecad MO C-C	Clone- Clone	h2b8	5.187	317.081	19.467	1345.735	8.347
Ecad MO C-C	Clone- Clone	h2b8	5.187	380.174	20.313	1597.014	8.347
Ecad MO C-C	Clone- Clone	h2b8	5.187	485.763	14.985	2933.493	8.347
Ecad MO C-C	Clone- Clone	h2b8	5.187	563.664	9.34	4095	8.347
Ecad MO C-C	Clone- Clone	h2b8	5.187	425.846	1.487	4095	8.347
Ecad MO C-C	Clone- Clone
Ecad MO C-C	Clone- Clone	h2b9	6.322	487.24	16.844	1951.446	10.192
Ecad MO C-C	Clone- Clone	h2b9	6.322	507.67	48.784	3189.518	10.192
Ecad MO C-C	Clone- Clone	h2b9	6.322	545.31	47.021	2492.397	10.192
Ecad MO C-C	Clone- Clone	h2b9	6.322	552.811	49.18	1777.309	10.192
Ecad MO C-C	Clone- Clone	h2b9	6.322	588.582	34.982	2964.545	10.192
Ecad MO C-C	Clone- Clone	h2b9	6.322	588.958	30.275	4095	10.192
Ecad MO C-C	Clone- Clone	h2b9	6.322	341.458	22.001	4095	10.192
Ecad MO C-C	Clone- Clone
Ecad MO C-C	Clone- Clone	h2b10	5.782	157.056	3.379	682.237	9.312
Ecad MO C-C	Clone- Clone	h2b10	5.782	256.256	9.796	1463.127	9.312
Ecad MO C-C	Clone- Clone	h2b10	5.782	340.336	23.961	1634.528	9.312
Ecad MO C-C	Clone- Clone	h2b10	5.782	384.574	37.368	1806.432	9.312
Ecad MO C-C	Clone- Clone	h2b10	5.782	391.061	35.872	2473.702	9.312
Ecad MO C-C	Clone- Clone	h2b10	5.782	381.578	20.827	3370.983	9.312
Ecad MO C-C	Clone- Clone
Ecad MO C-C	Clone- Clone	h2b11	3.35	339.67	17.055	1134.471	5.359
Ecad MO C-C	Clone- Clone	h2b11	3.35	474.536	12.264	2324.359	5.359
Ecad MO C-C	Clone- Clone	h2b11	3.35	505.338	22.734	2277.397	5.359
Ecad MO C-C	Clone- Clone	h2b11	3.35	490.489	19.902	2306.164	5.359
Ecad MO C-C	Clone- Clone	h2b11	3.35	468.659	15.104	3250.547	5.359
Ecad MO C-C	Clone- Clone	h2b11	3.35	356.668	7.246	3071.452	5.359
Ecad MO C-C	Clone- Clone	h2b11	3.35	191.5	0.234	1419.308	5.359
Ecad MO C-C	Clone- Clone	h3b1	6.808	338.05	17.182	2363.363	10.982
Ecad MO C-C	Clone- Clone	h3b1	6.808	405.931	39.853	3436.776	10.982
Ecad MO C-C	Clone- Clone	h3b1	6.808	441.962	42.714	2501.3	10.982
Ecad MO C-C	Clone- Clone	h3b1	6.808	612.371	80.725	3009.62	10.982
Ecad MO C-C	Clone- Clone	h3b1	6.808	676.197	35.924	3917.085	10.982
Ecad MO C-C	Clone- Clone
Ecad MO C-C	Clone- Clone	h3b2	13.941	343.455	24.501	3558.371	22.58
Ecad MO C-C	Clone- Clone	h3b2	13.941	371.692	9.86	3620.6	22.58
Ecad MO C-C	Clone- Clone	h3b2	13.941	439.89	25.228	3405.26	22.58
Ecad MO C-C	Clone- Clone	h3b2	13.941	542.329	76.256	3308.076	22.58
Ecad MO C-C	Clone- Clone	h3b2	13.941	683.741	61.448	4095	22.58
Ecad MO C-C	Clone- Clone	h3b2	13.941	687.616	57.737	4090.24	22.58
Ecad MO C-C	Clone- Clone
Ecad MO C-C	Clone- Clone	h3b3	12.86	319.819	16.727	2306.677	20.822
Ecad MO C-C	Clone- Clone	h3b3	12.86	353.161	58.6	3447.774	20.822
Ecad MO C-C	Clone- Clone	h3b3	12.86	457.716	19.288	3047.186	20.822
Ecad MO C-C	Clone- Clone	h3b3	12.86	681.62	30.551	4040.079	20.822
Ecad MO C-C	Clone- Clone	h3b3	12.86	538.206	12.84	3830.611	20.822
Ecad MO C-C	Clone- Clone
Ecad MO C-C	Clone- Clone	h3b4	8.105	293.346	10.345	1350.304	13.091
Ecad MO C-C	Clone- Clone	h3b4	8.105	358.707	14.211	1272.323	13.091
Ecad MO C-C	Clone- Clone	h3b4	8.105	399.875	31.093	1445.366	13.091
Ecad MO C-C	Clone- Clone	h3b4	8.105	455.831	11.699	3278.662	13.091
Ecad MO C-C	Clone- Clone	h3b4	8.105	534.337	52.625	4050.344	13.091
Ecad MO C-C	Clone- Clone
Ecad MO C-C	Clone- Clone	h3b5	6.754	426.515	67.085	2134.125	10.894
Ecad MO C-C	Clone- Clone	h3b5	6.754	448.739	55.651	2914.513	10.894
Ecad MO C-C	Clone- Clone	h3b5	6.754	597.851	64.873	3794.921	10.894
Ecad MO C-C	Clone- Clone	h3b5	6.754	888.726	79.099	3086.894	10.894
Ecad MO C-C	Clone- Clone	h3b5	6.754	722.335	54.52	3704.207	10.894
Ecad MO C-C	Clone- Clone	h3b5	6.754	534.338	45.596	3716.815	10.894
Ecad MO C-C	Clone- Clone	h4b1	8.537	488.681	39.89	1518.247	13.794
Ecad MO C-C	Clone- Clone	h4b1	8.537	791.835	96.374	4010.642	13.794
Ecad MO C-C	Clone- Clone	h4b1	8.537	864.352	100.011	4095	13.794
Ecad MO C-C	Clone- Clone	h4b1	8.537	862.058	69.145	4095	13.794
Ecad MO C-C	Clone- Clone	h4b1	8.537	714.619	68.798	4095	13.794
Ecad MO C-C	Clone- Clone	h4b1	8.537	530.103	38.025	4094.19	13.794
Ecad MO C-C	Clone- Clone	h4b1	8.537	520.739	38.579	4095	13.794
Ecad MO C-C	Clone- Clone	h4b1	8.537	497.274	37.134	4072.722	13.794
Ecad MO C-C	Clone- Clone
Ecad MO C-C	Clone- Clone	h4b2	8.375	778.384	40.45	2717.901	13.53
Ecad MO C-C	Clone- Clone	h4b2	8.375	866.462	27.896	4095	13.53
Ecad MO C-C	Clone- Clone	h4b2	8.375	822.282	69.163	4095	13.53
Ecad MO C-C	Clone- Clone	h4b2	8.375	780.555	97.427	4095	13.53
Ecad MO C-C	Clone- Clone	h4b2	8.375	714.209	68.787	4087.296	13.53
Ecad MO C-C	Clone- Clone	h4b2	8.375	557.109	40.237	3178.992	13.53
Ecad MO C-C	Clone- Clone
Ecad MO C-C	Clone- Clone	h4b3	12.914	709.062	75.043	4095	20.91
Ecad MO C-C	Clone- Clone	h4b3	12.914	869.974	82.405	4095	20.91
Ecad MO C-C	Clone- Clone	h4b3	12.914	892.471	31.254	3690.602	20.91
Ecad MO C-C	Clone- Clone	h4b3	12.914	720.79	86.623	2743.274	20.91
Ecad MO C-C	Clone- Clone	h4b3	12.914	580.018	79.476	3199.816	20.91
Ecad MO C-C	Clone- Clone	h4b3	12.914	566.358	66.228	3617.892	20.91
Ecad MO C-C	Clone- Clone
Ecad MO C-C	Clone- Clone	h4b4	9.402	758.326	35.697	3232.17	15.2
Ecad MO C-C	Clone- Clone	h4b4	9.402	522.996	40.701	2743.939	15.2
Ecad MO C-C	Clone- Clone	h4b4	9.402	406.864	52.952	2211.187	15.2
Ecad MO C-C	Clone- Clone	h4b4	9.402	355.623	69.147	2047.516	15.2
Ecad MO C-C	Clone- Clone	h4b4	9.402	419.079	68.865	2983.679	15.2
Ecad MO C-C	Clone- Clone	h4b4	9.402	469.115	74.327	3635.958	15.2
Ecad MO C-C	Clone- Clone
Ecad MO C-C	Clone- Clone	h4b5	11.185	415.734	2.113	2536.431	18.099
Ecad MO C-C	Clone- Clone	h4b5	11.185	659.199	19.152	4095	18.099
Ecad MO C-C	Clone- Clone	h4b5	11.185	509.077	44.31	4095	18.099
Ecad MO C-C	Clone- Clone	h4b5	11.185	479.993	34.746	4095	18.099
Ecad MO C-C	Clone- Clone	h4b5	11.185	473.552	19.287	3077.952	18.099
Ecad MO C-C	Clone- Clone	h4b5	11.185	533.272	43.408	3437.188	18.099
Ecad MO C-C	Clone- Clone	h4b5	11.185	557.313	51.99	2430.284	18.099
Ecad MO C-C	Clone- Clone	h4b5	11.185	559.795	22.571	3226.358	18.099
Ecad MO C-C	Clone- Clone
Ecad MO C-C	Clone- Clone	h4b6	7.997	716.268	45.21	4095	12.915
Ecad MO C-C	Clone- Clone	h4b6	7.997	816.22	47.642	4095	12.915
Ecad MO C-C	Clone- Clone	h4b6	7.997	910.156	83.464	4095	12.915
Ecad MO C-C	Clone- Clone	h4b6	7.997	820.721	82.657	4095	12.915
Ecad MO C-C	Clone- Clone	h4b6	7.997	672.583	80.881	3800.245	12.915
Ecad MO C-C	Clone- Clone	h4b6	7.997	605.408	51.532	3540.418	12.915
Ecad MO N-C	Non Clone- Clone	h1b1	12.752	574.541	53.534	2788.196	20.647
Ecad MO N-C	Non Clone- Clone	h1b1	12.752	697.673	141.831	2202.753	20.647
Ecad MO N-C	Non Clone- Clone	h1b1	12.752	852.218	145.648	3287.282	20.647
Ecad MO N-C	Non Clone- Clone	h1b1	12.752	1048.292	173.666	4095	20.647
Ecad MO N-C	Non Clone- Clone	h1b1	12.752	1184.319	66.993	4095	20.647
Ecad MO N-C	Non Clone- Clone	h1b1	12.752	945.246	33.277	3881.69	20.647
Ecad MO N-C	Non Clone- Clone
Ecad MO N-C	Non Clone- Clone	h1b2	8.645	579.704	80.372	3783.537	13.969
Ecad MO N-C	Non Clone- Clone	h1b2	8.645	830.391	61.697	4095	13.969
Ecad MO N-C	Non Clone- Clone	h1b2	8.645	945.98	98.375	4070.569	13.969
Ecad MO N-C	Non Clone- Clone	h1b2	8.645	1030.292	73.461	3801.394	13.969
Ecad MO N-C	Non Clone- Clone	h1b2	8.645	895.301	29.292	4047.794	13.969
Ecad MO N-C	Non Clone- Clone
Ecad MO N-C	Non Clone- Clone	h1b3	17.507	421.576	8.168	4007.75	28.378
Ecad MO N-C	Non Clone- Clone	h1b3	17.507	590.045	33.656	4075.945	28.378
Ecad MO N-C	Non Clone- Clone	h1b3	17.507	722.515	68.797	4095	28.378
Ecad MO N-C	Non Clone- Clone	h1b3	17.507	836.937	44.547	3971.29	28.378
Ecad MO N-C	Non Clone- Clone	h1b3	17.507	892.491	40.048	4095	28.378
Ecad MO N-C	Non Clone- Clone
Ecad MO N-C	Non Clone- Clone	h1b4	9.51	428.837	40.961	1811.405	15.375
Ecad MO N-C	Non Clone- Clone	h1b4	9.51	714.57	87.704	3590.124	15.375
Ecad MO N-C	Non Clone- Clone	h1b4	9.51	1023.114	116.09	4095	15.375
Ecad MO N-C	Non Clone- Clone	h1b4	9.51	1223.758	148.108	4095	15.375
Ecad MO N-C	Non Clone- Clone	h1b4	9.51	1205.045	212.216	4095	15.375
Ecad MO N-C	Non Clone- Clone	h1b4	9.51	1122.711	113.746	4095	15.375
Ecad MO N-C	Non Clone- Clone
Ecad MO N-C	Non Clone- Clone	h1b5	9.132	311.939	33.416	1522.06	14.76
Ecad MO N-C	Non Clone- Clone	h1b5	9.132	493.11	87.63	2051.218	14.76
Ecad MO N-C	Non Clone- Clone	h1b5	9.132	778.444	105.791	3503.797	14.76
Ecad MO N-C	Non Clone- Clone	h1b5	9.132	1079.788	103.573	3818.445	14.76
Ecad MO N-C	Non Clone- Clone	h1b5	9.132	1013.202	130.731	3834.657	14.76
Ecad MO N-C	Non Clone- Clone
Ecad MO N-C	Non Clone- Clone	h1b6	9.942	301.922	30.83	1380.393	16.078
Ecad MO N-C	Non Clone- Clone	h1b6	9.942	421.368	38.928	2361.576	16.078
Ecad MO N-C	Non Clone- Clone	h1b6	9.942	617.358	26.641	4010	16.078
Ecad MO N-C	Non Clone- Clone	h1b6	9.942	890.662	61.733	4095	16.078
Ecad MO N-C	Non Clone- Clone	h1b6	9.942	1019.162	43.657	4095	16.078
Ecad MO N-C	Non Clone- Clone
Ecad MO N-C	Non Clone- Clone	h1b7	12.752	309.065	15.828	1434.367	20.646
Ecad MO N-C	Non Clone- Clone	h1b7	12.752	434.004	16.972	3372.396	20.646
Ecad MO N-C	Non Clone- Clone	h1b7	12.752	560.841	41.405	4019.569	20.646
Ecad MO N-C	Non Clone- Clone	h1b7	12.752	787.502	37.706	4095	20.646
Ecad MO N-C	Non Clone- Clone	h1b7	12.752	1092.809	43.939	4095	20.646
Ecad MO N-C	Non Clone- Clone	h1b7	12.752	971.856	35.199	4072.582	20.646
Ecad MO N-C	Non Clone- Clone
Ecad MO N-C	Non Clone- Clone	h1b8	9.51	409.172	4.412	1930.238	15.375
Ecad MO N-C	Non Clone- Clone	h1b8	9.51	494.191	59.499	2605.751	15.375
Ecad MO N-C	Non Clone- Clone	h1b8	9.51	661.884	80.284	4095	15.375
Ecad MO N-C	Non Clone- Clone	h1b8	9.51	983.36	126.05	4095	15.375
Ecad MO N-C	Non Clone- Clone	h1b8	9.51	1118.512	115.083	4095	15.375
Ecad MO N-C	Non Clone- Clone
Ecad MO N-C	Non Clone- Clone	h1b9	10.753	638.334	35.537	2699.114	17.396
Ecad MO N-C	Non Clone- Clone	h1b9	10.753	553.606	74.141	3094.698	17.396
Ecad MO N-C	Non Clone- Clone	h1b9	10.753	651.014	89.329	4095	17.396
Ecad MO N-C	Non Clone- Clone	h1b9	10.753	869.619	42.069	4095	17.396
Ecad MO N-C	Non Clone- Clone	h1b9	10.753	1090.887	52.156	4095	17.396
Ecad MO N-C	Non Clone- Clone	h1b9	10.753	1065.119	23.183	4095	17.396
Ecad MO N-C	Non Clone- Clone	h1b9	10.753	598.425	13.309	4022.837	17.396
Ecad MO N-C	Non Clone- Clone
Ecad MO N-C	Non Clone- Clone	h1b10	5.349	533.642	46.651	1941.728	8.61
Ecad MO N-C	Non Clone- Clone	h1b10	5.349	506.827	87.813	1759.616	8.61
Ecad MO N-C	Non Clone- Clone	h1b10	5.349	742.201	109.194	1829.463	8.61
Ecad MO N-C	Non Clone- Clone	h1b10	5.349	1043.868	222.255	4095	8.61
Ecad MO N-C	Non Clone- Clone	h1b10	5.349	1064.371	115.039	4095	8.61
Ecad MO N-C	Non Clone- Clone
Ecad MO N-C	Non Clone- Clone	h1b11	11.888	410.268	26.546	1712.74	19.241
Ecad MO N-C	Non Clone- Clone	h1b11	11.888	457.13	24.114	1978.554	19.241
Ecad MO N-C	Non Clone- Clone	h1b11	11.888	524.343	22.247	4095	19.241
Ecad MO N-C	Non Clone- Clone	h1b11	11.888	521.507	21.273	4095	19.241
Ecad MO N-C	Non Clone- Clone	h1b11	11.888	547.426	25.899	4095	19.241
Ecad MO N-C	Non Clone- Clone	h1b11	11.888	641.108	35.257	4095	19.241
Ecad MO N-C	Non Clone- Clone	h1b11	11.888	700.465	13.997	4095	19.241
Ecad MO N-C	Non Clone- Clone
Ecad MO N-C	Non Clone- Clone	h1b12	13.184	483.382	7.925	3373.224	21.35
Ecad MO N-C	Non Clone- Clone	h1b12	13.184	544.985	35.085	4047.712	21.35
Ecad MO N-C	Non Clone- Clone	h1b12	13.184	646.685	49.107	4095	21.35
Ecad MO N-C	Non Clone- Clone	h1b12	13.184	592.211	35.996	4095	21.35
Ecad MO N-C	Non Clone- Clone	h1b12	13.184	538.609	18.87	3789.653	21.35
Ecad MO N-C	Non Clone- Clone	h1b12	13.184	450.866	20.989	3230.574	21.35
Ecad MO N-C	Non Clone- Clone
Ecad MO N-C	Non Clone- Clone	h1b13	10.212	366.616	16.95	3672.655	16.517
Ecad MO N-C	Non Clone- Clone	h1b13	10.212	484.027	25.612	4095	16.517
Ecad MO N-C	Non Clone- Clone	h1b13	10.212	535.054	26.285	4095	16.517
Ecad MO N-C	Non Clone- Clone	h1b13	10.212	486.627	29.612	4095	16.517
Ecad MO N-C	Non Clone- Clone	h1b13	10.212	501.351	31.202	4095	16.517
Ecad MO N-C	Non Clone- Clone
Ecad MO N-C	Non Clone- Clone	h1b14	10.807	215.349	3.016	1060.481	17.484
Ecad MO N-C	Non Clone- Clone	h1b14	10.807	245.521	16.051	2951.559	17.484
Ecad MO N-C	Non Clone- Clone	h1b14	10.807	263.954	10.271	3926.453	17.484
Ecad MO N-C	Non Clone- Clone	h1b14	10.807	243.403	17.518	3518.313	17.484
Ecad MO N-C	Non Clone- Clone	h1b14	10.807	277.994	25.357	2524.412	17.484
Ecad MO N-C	Non Clone- Clone	h1b14	10.807	358.544	12.994	4095	17.484
Ecad MO N-C	Non Clone- Clone
Ecad MO N-C	Non Clone- Clone	h1b15	11.996	210.343	19.808	1462.815	19.417
Ecad MO N-C	Non Clone- Clone	h1b15	11.996	329.527	31.301	1666.736	19.417
Ecad MO N-C	Non Clone- Clone	h1b15	11.996	576.412	48.839	3848.195	19.417
Ecad MO N-C	Non Clone- Clone	h1b15	11.996	835.916	35.204	4095	19.417
Ecad MO N-C	Non Clone- Clone	h1b15	11.996	997.833	40.899	4095	19.417
Ecad MO N-C	Non Clone- Clone	h1b15	11.996	796.952	32.848	4095	19.417
Ecad MO N-C	Non Clone- Clone
Ecad MO N-C	Non Clone- Clone	h1b16	8.862	360.618	44.197	1526.472	14.321
Ecad MO N-C	Non Clone- Clone	h1b16	8.862	294.517	31.433	1438.181	14.321
Ecad MO N-C	Non Clone- Clone	h1b16	8.862	291.016	22.183	1571.392	14.321
Ecad MO N-C	Non Clone- Clone	h1b16	8.862	369.156	31.036	3446.595	14.321
Ecad MO N-C	Non Clone- Clone	h1b16	8.862	544.009	72.324	4063.125	14.321
Ecad MO N-C	Non Clone- Clone
Ecad MO N-C	Non Clone- Clone	h1b17	12.05	421.015	12.621	1552.968	19.505
Ecad MO N-C	Non Clone- Clone	h1b17	12.05	400.522	32.619	1474.113	19.505
Ecad MO N-C	Non Clone- Clone	h1b17	12.05	415.116	29.984	1803.827	19.505
Ecad MO N-C	Non Clone- Clone	h1b17	12.05	440.282	48.42	3828.146	19.505
Ecad MO N-C	Non Clone- Clone	h1b17	12.05	485.08	38.259	3436.684	19.505
Ecad MO N-C	Non Clone- Clone	h1b17	12.05	545.896	80.195	2991.625	19.505
Ecad MO N-C	Non Clone- Clone	h1b17	12.05	733.741	86.153	2731.526	19.505
Ecad MO N-C	Non Clone- Clone
Ecad MO N-C	Non Clone- Clone	h1b18	6.322	245.982	16.042	1505.884	10.192
Ecad MO N-C	Non Clone- Clone	h1b18	6.322	428.383	63.345	4095	10.192
Ecad MO N-C	Non Clone- Clone	h1b18	6.322	491.353	65.183	4095	10.192
Ecad MO N-C	Non Clone- Clone	h1b18	6.322	532.547	114.115	2900.189	10.192
Ecad MO N-C	Non Clone- Clone	h1b18	6.322	722.284	103.721	4095	10.192
Ecad MO N-C	Non Clone- Clone
Ecad MO N-C	Non Clone- Clone	h1b19	12.266	454.3	4.299	2869.335	19.856
Ecad MO N-C	Non Clone- Clone	h1b19	12.266	546.769	47.283	4095	19.856
Ecad MO N-C	Non Clone- Clone	h1b19	12.266	618.84	56.995	4095	19.856
Ecad MO N-C	Non Clone- Clone	h1b19	12.266	650.506	109.092	4068.85	19.856
Ecad MO N-C	Non Clone- Clone	h1b19	12.266	753.214	82.706	4095	19.856
Ecad MO N-C	Non Clone- Clone	h1b19	12.266	909.513	80.624	4095	19.856
Ecad MO N-C	Non Clone- Clone	h1b19	12.266	917.359	54.12	4095	19.856
Ecad MO N-C	Non Clone- Clone	h2b1	22.586	528.698	28.346	3025.196	36.637
Ecad MO N-C	Non Clone- Clone	h2b1	22.586	494.897	24.616	4095	36.637
Ecad MO N-C	Non Clone- Clone	h2b1	22.586	460.086	33.579	4095	36.637
Ecad MO N-C	Non Clone- Clone	h2b1	22.586	420.542	8.939	4095	36.637
Ecad MO N-C	Non Clone- Clone	h2b1	22.586	378.324	10.382	2533.439	36.637
Ecad MO N-C	Non Clone- Clone	h2b1	22.586	355.257	8.038	4095	36.637
Ecad MO N-C	Non Clone- Clone
Ecad MO N-C	Non Clone- Clone	h2b2	8.483	279.8	4.934	1124.623	13.706
Ecad MO N-C	Non Clone- Clone	h2b2	8.483	361.197	3.419	1569.02	13.706
Ecad MO N-C	Non Clone- Clone	h2b2	8.483	469.224	21.086	3304.008	13.706
Ecad MO N-C	Non Clone- Clone	h2b2	8.483	494.434	33.149	3758.806	13.706
Ecad MO N-C	Non Clone- Clone	h2b2	8.483	565.379	29.24	4009.404	13.706
Ecad MO N-C	Non Clone- Clone	h2b2	8.483	553.384	19.115	4030.425	13.706
Ecad MO N-C	Non Clone- Clone	h2b2	8.483	507.722	33.587	3508.691	13.706
Ecad MO N-C	Non Clone- Clone
Ecad MO N-C	Non Clone- Clone	h2b3	18.966	321.155	6.139	1160.047	30.749
Ecad MO N-C	Non Clone- Clone	h2b3	18.966	437.638	8.308	1433.489	30.749
Ecad MO N-C	Non Clone- Clone	h2b3	18.966	534.184	18.054	1780.484	30.749
Ecad MO N-C	Non Clone- Clone	h2b3	18.966	487.376	36.566	2482.398	30.749
Ecad MO N-C	Non Clone- Clone	h2b3	18.966	424.302	24.99	3495.795	30.749
Ecad MO N-C	Non Clone- Clone	h2b3	18.966	434.932	38.605	4052.119	30.749
Ecad MO N-C	Non Clone- Clone	h2b3	18.966	474.38	27.543	4041.729	30.749
Ecad MO N-C	Non Clone- Clone	h2b3	18.966	478.42	13.825	3250.649	30.749
Ecad MO N-C	Non Clone- Clone
Ecad MO N-C	Non Clone- Clone	h2b4	15.832	325.307	11.877	1377.955	25.655
Ecad MO N-C	Non Clone- Clone	h2b4	15.832	358.723	20.454	1999.076	25.655
Ecad MO N-C	Non Clone- Clone	h2b4	15.832	421.314	14.923	3843.198	25.655
Ecad MO N-C	Non Clone- Clone	h2b4	15.832	428.626	9.156	3103.078	25.655
Ecad MO N-C	Non Clone- Clone	h2b4	15.832	428.435	19.553	2527.845	25.655
Ecad MO N-C	Non Clone- Clone	h2b4	15.832	390.963	11.767	2543.474	25.655
Ecad MO N-C	Non Clone- Clone	h2b4	15.832	300.074	3.683	3973.122	25.655
Ecad MO N-C	Non Clone- Clone	h2b4	15.832	269.891	1.425	3060.127	25.655
Ecad MO N-C	Non Clone- Clone
Ecad MO N-C	Non Clone- Clone	h2b5	7.295	236.496	1.61	996.08	11.773
Ecad MO N-C	Non Clone- Clone	h2b5	7.295	324.767	8.628	1964.205	11.773
Ecad MO N-C	Non Clone- Clone	h2b5	7.295	432.661	9.918	3229.026	11.773
Ecad MO N-C	Non Clone- Clone	h2b5	7.295	438.483	47.98	1734.332	11.773
Ecad MO N-C	Non Clone- Clone	h2b5	7.295	435.718	80.731	1342.036	11.773
Ecad MO N-C	Non Clone- Clone	h2b5	7.295	472.591	55.345	1761.14	11.773
Ecad MO N-C	Non Clone- Clone	h2b5	7.295	556.769	60.972	2601.355	11.773
Ecad MO N-C	Non Clone- Clone	h2b5	7.295	658.006	26.782	3811.491	11.773
Ecad MO N-C	Non Clone- Clone	h2b5	7.295	627.787	17.086	4095	11.773
Ecad MO N-C	Non Clone- Clone
Ecad MO N-C	Non Clone- Clone	h2b6	14.103	397.277	16.83	2230.152	22.843
Ecad MO N-C	Non Clone- Clone	h2b6	14.103	395.52	24.2	3238.963	22.843
Ecad MO N-C	Non Clone- Clone	h2b6	14.103	473.379	8.574	2090.34	22.843
Ecad MO N-C	Non Clone- Clone	h2b6	14.103	503.68	37.516	2441.278	22.843
Ecad MO N-C	Non Clone- Clone	h2b6	14.103	559.07	58.651	2714.249	22.843
Ecad MO N-C	Non Clone- Clone	h2b6	14.103	536.661	48.536	3982.521	22.843
Ecad MO N-C	Non Clone- Clone	h2b6	14.103	445.028	9.515	4080.976	22.843
Ecad MO N-C	Non Clone- Clone
Ecad MO N-C	Non Clone- Clone	h3b1	9.402	507.597	9.891	3467.899	15.192
Ecad MO N-C	Non Clone- Clone	h3b1	9.402	583.21	51.1	3337.195	15.192
Ecad MO N-C	Non Clone- Clone	h3b1	9.402	639.645	53.637	2663.497	15.192
Ecad MO N-C	Non Clone- Clone	h3b1	9.402	488.996	53.067	3821.633	15.192
Ecad MO N-C	Non Clone- Clone	h3b1	9.402	441.37	41.237	3517.201	15.192
Ecad MO N-C	Non Clone- Clone
Ecad MO N-C	Non Clone- Clone	h3b2	8.159	496.77	40.089	1613.613	13.179
Ecad MO N-C	Non Clone- Clone	h3b2	8.159	528.322	30.146	2309	13.179
Ecad MO N-C	Non Clone- Clone	h3b2	8.159	479.51	60.619	3296.726	13.179
Ecad MO N-C	Non Clone- Clone	h3b2	8.159	486.056	81.65	2922.552	13.179
Ecad MO N-C	Non Clone- Clone	h3b2	8.159	565.106	53.894	2841.808	13.179
Ecad MO N-C	Non Clone- Clone	h3b2	8.159	497.481	16.092	2073.332	13.179
Ecad MO N-C	Non Clone- Clone	h3b2	8.159	424.188	10.767	2683.855	13.179
Ecad MO N-C	Non Clone- Clone	h4b1	9.726	281.431	12.497	974.28	15.727
Ecad MO N-C	Non Clone- Clone	h4b1	9.726	458.507	12.378	1981.458	15.727
Ecad MO N-C	Non Clone- Clone	h4b1	9.726	510.464	14.715	1835.326	15.727
Ecad MO N-C	Non Clone- Clone	h4b1	9.726	612.221	82.505	2053.384	15.727
Ecad MO N-C	Non Clone- Clone	h4b1	9.726	626.427	55.24	2531.738	15.727
Ecad MO N-C	Non Clone- Clone	h4b1	9.726	765.345	4.444	4095	15.727
Ecad MO N-C	Non Clone- Clone
Ecad MO N-C	Non Clone- Clone	h4b2	5.566	824.103	67.473	4079.081	8.962
Ecad MO N-C	Non Clone- Clone	h4b2	5.566	859.192	118.824	4095	8.962
Ecad MO N-C	Non Clone- Clone	h4b2	5.566	783.536	94.947	4095	8.962
Ecad MO N-C	Non Clone- Clone	h4b2	5.566	647.107	39.842	4095	8.962
Ecad MO N-C	Non Clone- Clone	h4b2	5.566	465.316	34.679	4085.078	8.962
Ecad MO N-C	Non Clone- Clone	h4b2	5.566	486.956	49.686	3478.833	8.962
Ecad MO N-C	Non Clone- Clone
Ecad MO N-C	Non Clone- Clone	h4b3	7.835	526.37	16.287	4034.024	12.652
Ecad MO N-C	Non Clone- Clone	h4b3	7.835	469.97	22.579	4089.314	12.652
Ecad MO N-C	Non Clone- Clone	h4b3	7.835	365.867	22.682	3908.131	12.652
Ecad MO N-C	Non Clone- Clone	h4b3	7.835	301.858	19.852	3267.626	12.652
Ecad MO N-C	Non Clone- Clone	h4b3	7.835	268.603	28.325	2308.571	12.652
Ecad MO N-C	Non Clone- Clone	h4b3	7.835	288.915	8.062	3015.029	12.652
Ecad MO N-C	Non Clone- Clone	h4b3	7.781	1105.48	144.254	4095	12.564
Ecad MO N-C	Non Clone- Clone	h4b3	7.781	1101.056	192.843	4093.7	12.564
Ecad MO N-C	Non Clone- Clone	h4b3	7.781	754.019	66.808	3846.945	12.564
Ecad MO N-C	Non Clone- Clone
Ecad MO N-C	Non Clone- Clone	h4b4	9.51	396.055	4.77	1263.285	15.375
Ecad MO N-C	Non Clone- Clone	h4b4	9.51	561.354	22.555	1597.759	15.375
Ecad MO N-C	Non Clone- Clone	h4b4	9.51	503.837	22.881	1578.637	15.375
Ecad MO N-C	Non Clone- Clone	h4b4	9.51	331.286	9.157	1499.505	15.375
Ecad MO N-C	Non Clone- Clone	h4b4	9.672	570.272	58.92	4094.78	15.639
Ecad MO N-C	Non Clone- Clone	h4b4	9.672	679.075	44.624	4094.361	15.639
Ecad MO N-C	Non Clone- Clone	h4b4	9.672	681.177	40.077	3802.624	15.639
Ecad MO N-C	Non Clone- Clone	h4b4	9.672	682.654	51.631	3907.521	15.639
Ecad MO N-C	Non Clone- Clone
Ecad MO N-C	Non Clone- Clone	h4b5	6.862	602.411	22.146	2474.408	11.07
Ecad MO N-C	Non Clone- Clone	h4b5	6.862	725.754	65.098	4095	11.07
Ecad MO N-C	Non Clone- Clone	h4b5	6.862	690.333	36.658	4095	11.07
Ecad MO N-C	Non Clone- Clone	h4b5	6.862	563.339	34.61	4047.686	11.07
Ecad MO N-C	Non Clone- Clone	h4b5	5.62	958.676	85.742	3350.783	9.049
Ecad MO N-C	Non Clone- Clone	h4b5	5.62	716.079	69.081	3706.924	9.049
Ecad MO N-C	Non Clone- Clone	h4b5	5.62	575.734	26.265	3140.098	9.049
Ecad MO N-C	Non Clone- Clone	h4b5	5.62	472.194	19.429	2982.678	9.049
Ecad MO N-C	Non Clone- Clone
Ecad MO N-C	Non Clone- Clone	h4b6	9.672	905.888	61.689	3608.199	15.639
Ecad MO N-C	Non Clone- Clone	h4b6	9.672	906.705	102.628	4095	15.639
Ecad MO N-C	Non Clone- Clone	h4b6	9.672	890.676	86.961	4095	15.639
Ecad MO N-C	Non Clone- Clone	h4b6	9.672	974.736	127.124	4095	15.639
Ecad MO N-C	Non Clone- Clone	h4b6	9.672	1073.54	144.757	4050.555	15.639
Ecad MO N-C	Non Clone- Clone	h4b6	9.672	1180.674	59.355	4095	15.639
Ecad MO N-C	Non Clone- Clone	h4b6	9.672	1167.58	182.041	4095	15.639
Ecad MO N-C	Non Clone- Clone
Ecad MO N-C	Non Clone- Clone	h4b7	8.754	667.781	17.256	4090.251	14.145
Ecad MO N-C	Non Clone- Clone	h4b7	8.754	735.546	4.87	4095	14.145
Ecad MO N-C	Non Clone- Clone	h4b7	8.754	794.543	13.181	4095	14.145
Ecad MO N-C	Non Clone- Clone	h4b7	8.754	901.836	37.151	4095	14.145
Ecad MO N-C	Non Clone- Clone	h4b7	8.754	931.469	46.037	4013.452	14.145
Ecad MO N-C	Non Clone- Clone	h4b7	8.754	673.84	123.089	2811.802	14.145
Ecad MO N-C	Non Clone- Clone	h4b7	8.754	568.539	69.727	3302.014	14.145
Ecad MO N-C	Non Clone- Clone
Ecad MO N-C	Non Clone- Clone	h4b8	9.726	643.084	18.673	2816.033	15.713
Ecad MO N-C	Non Clone- Clone	h4b8	9.726	768.263	26.765	4095	15.713
Ecad MO N-C	Non Clone- Clone	h4b8	9.726	682.741	54.119	4095	15.713
Ecad MO N-C	Non Clone- Clone	h4b8	9.726	666.686	113.056	4093.539	15.713
Ecad MO N-C	Non Clone- Clone	h4b8	9.726	697.152	67.896	3679.334	15.713
Ecad MO N-C	Non Clone- Clone	h4b8	9.726	892.607	105.546	3476.829	15.713
Ecad MO N-C	Non Clone- Clone	h4b8	9.726	929.305	64.673	3490.662	15.713
Ecad MO N-C	Non Clone- Clone	h4b8	9.726	734.073	125.603	2521.795	15.713
Ecad MO N-C	Non Clone- Clone
Ecad MO N-C	Non Clone- Clone	h4b9	10.645	789.554	105.757	4095	17.22
Ecad MO N-C	Non Clone- Clone	h4b9	10.645	715.471	141.507	4095	17.22
Ecad MO N-C	Non Clone- Clone	h4b9	10.645	675.551	105.245	4095	17.22
Ecad MO N-C	Non Clone- Clone	h4b9	10.375	1095.272	37.525	3638.171	16.781
Ecad MO N-C	Non Clone- Clone	h4b9	10.375	1017.815	56.684	4083.507	16.781
Ecad MO N-C	Non Clone- Clone	h4b9	10.375	705.132	81.729	4018.94	16.781
Ecad MO N-C	Non Clone- Clone
Ecad MO N-C	Non Clone- Clone	h4b10	8.754	440.509	20.934	1804.921	14.145
Ecad MO N-C	Non Clone- Clone	h4b10	8.754	719.558	17.366	2421.926	14.145
Ecad MO N-C	Non Clone- Clone	h4b10	8.754	575.286	38.731	2957.35	14.145
Ecad MO N-C	Non Clone- Clone	h4b10	8.754	543.233	16.945	3366.269	14.145
Ecad MO N-C	Non Clone- Clone	h4b10	8.754	528.489	51.289	4095	14.145
Ecad MO N-C	Non Clone- Clone	h4b10	8.754	634.174	79.084	4095	14.145
Ecad MO N-C	Non Clone- Clone
Ecad MO N-C	Non Clone- Clone	h4b11	6.376	456.56	30.756	1074.043	10.279
Ecad MO N-C	Non Clone- Clone	h4b11	6.376	921.915	124.694	4027.131	10.279
Ecad MO N-C	Non Clone- Clone	h4b11	6.376	1178.661	310.75	4095	10.279
Ecad MO N-C	Non Clone- Clone	h4b11	6.376	1300.268	276.588	4095	10.279
Ecad MO N-C	Non Clone- Clone	h4b11	6.376	1482.399	259.216	4095	10.279
Ecad MO N-C	Non Clone- Clone	h4b11	6.376	1654.709	333.068	4095	10.279
Ecad MO N-C	Non Clone- Clone	h4b11	6.376	1658.033	118.731	4092.542	10.279
Ecad MO N-C	Non Clone- Clone	h4b11	6.376	1226.024	198.302	3706.468	10.279
Ecad MO N-C	Non Clone- Clone	h4b11	6.376	834.134	141.769	3391.457	10.279
Ecad MO N-C	Non Clone- Clone
Ecad MO N-C	Non Clone- Clone	h4b12	6.16	324.096	10.463	994.554	9.925
Ecad MO N-C	Non Clone- Clone	h4b12	6.16	959.799	62.514	4083.704	9.925
Ecad MO N-C	Non Clone- Clone	h4b12	6.16	884.734	52.138	4095	9.925
Ecad MO N-C	Non Clone- Clone	h4b12	6.16	800.365	49.91	4095	9.925
Ecad MO N-C	Non Clone- Clone	h4b12	6.16	692.243	62.241	4095	9.925
Ecad MO N-C	Non Clone- Clone	h4b12	6.16	639.875	18.019	4095	9.925
Ecad MO N-C	Non Clone- Clone	h4b12	6.16	637.919	72.743	3309.623	9.925
Ecad MO N-C	Non Clone- Clone	h4b12	6.16	632.663	65.453	4033.006	9.925
Ecad MO N-C	Non Clone- Clone	h4b12	6.16	634.923	77.58	4073.33	9.925
Ecad MO N-C	Non Clone- Clone
Ecad MO N-C	Non Clone- Clone	h4b13	13.238	584.386	0.596	3914.247	21.438
Ecad MO N-C	Non Clone- Clone	h4b13	13.238	680.003	0.835	4095	21.438
Ecad MO N-C	Non Clone- Clone	h4b13	13.238	625.062	0.29	4095	21.438
Ecad MO N-C	Non Clone- Clone	h4b13	13.238	560.101	0.447	4095	21.438
Ecad MO N-C	Non Clone- Clone	h4b13	13.238	529.951	3.942	4095	21.438
Ecad MO N-C	Non Clone- Clone	h4b13	13.238	491.248	0.086	3949.525	21.438
Ecad MO N-C	Non Clone- Clone	h4b13	13.238	456.306	6.861	3928.656	21.438
Ecad MO N-C	Non Clone- Clone	h4b13	13.238	410.01	0.701	2732.106	21.438
Ecad MO N-C	Non Clone- Clone	h4b13	13.238	399.083	2.747	3035.947	21.438
Ecad MO N-C	Non Clone- Clone
Ecad MO N-C	Non Clone- Clone	h4b14	4.431	499.299	10.12	2793.087	7.117
Ecad MO N-C	Non Clone- Clone	h4b14	4.431	527.024	14.245	3936.077	7.117
Ecad MO N-C	Non Clone- Clone	h4b14	4.431	433.994	6.237	4095	7.117
Ecad MO N-C	Non Clone- Clone	h4b14	4.431	426.328	8.958	4095	7.117
Ecad MO N-C	Non Clone- Clone	h4b14	4.431	442.539	12.577	4095	7.117
Ecad MO N-C	Non Clone- Clone	h4b14	4.431	505.293	24.736	4095	7.117
Ecad MO N-C	Non Clone- Clone	h4b14	4.431	576.982	45.668	4095	7.117
Ecad MO N-C	Non Clone- Clone	h4b14	4.431	749.488	50.639	4023.782	7.117
Ecad MO N-C	Non Clone- Clone	h4b14	4.431	958.728	46.33	4078.413	7.117
Ecad MO N-C	Non Clone- Clone
Ecad MO N-C	Non Clone- Clone	h4b15	5.998	597.3	60.033	1940.018	9.664
Ecad MO N-C	Non Clone- Clone	h4b15	5.998	1040.382	131.681	4071.944	9.664
Ecad MO N-C	Non Clone- Clone	h4b15	5.998	1138.467	64.665	4095	9.664
Ecad MO N-C	Non Clone- Clone	h4b15	5.998	1254.164	104.421	4095	9.664
Ecad MO N-C	Non Clone- Clone	h4b15	5.998	1327.615	126.882	4095	9.664
Ecad MO N-C	Non Clone- Clone	h4b15	5.998	1357.885	97.032	4095	9.664
Ecad MO N-C	Non Clone- Clone	h4b15	5.998	1306.233	102.704	4095	9.664
Ecad MO N-C	Non Clone- Clone	h4b15	5.998	1214.372	87.316	4053.406	9.664
Ecad MO N-C	Non Clone- Clone	h4b15	5.998	1046.004	52.423	3935.97	9.664
Ecad MO N-C	Non Clone- Clone	h4b15	5.998	856.277	135.607	4095	9.664
Ecad MO N-C	Non Clone- Clone
Ecad MO N-C	Non Clone- Clone	h4b16	5.674	584.683	97.241	1492.899	9.137
Ecad MO N-C	Non Clone- Clone	h4b16	5.674	1076.626	101.199	4000.361	9.137
Ecad MO N-C	Non Clone- Clone	h4b16	5.674	1149.602	152.357	4095	9.137
Ecad MO N-C	Non Clone- Clone	h4b16	5.674	1171.187	253.273	4095	9.137
Ecad MO N-C	Non Clone- Clone	h4b16	5.674	1175.063	157.029	4095	9.137
Ecad MO N-C	Non Clone- Clone	h4b16	5.674	1093.332	126.802	4095	9.137
Ecad MO N-C	Non Clone- Clone	h4b16	5.674	947.579	72.226	4095	9.137
Ecad MO N-C	Non Clone- Clone	h4b16	5.674	932.468	140.631	4095	9.137
Ecad MO N-C	Non Clone- Clone	h4b16	5.674	862.87	103.24	3157.585	9.137
Ecad MO N-C	Non Clone- Clone	h4b16	6.322	1123.43	48.769	3685.063	10.192
Ecad MO N-C	Non Clone- Clone	h4b16	6.322	847.558	71.631	4095	10.192
Ecad MO N-C	Non Clone- Clone	h4b16	6.322	674.909	43.907	4095	10.192
Ecad MO N-C	Non Clone- Clone
Ecad MO N-C	Non Clone- Clone	h4b17	11.293	613.387	34.336	4025.147	18.275
Ecad MO N-C	Non Clone- Clone	h4b17	11.293	668.762	74.861	4095	18.275
Ecad MO N-C	Non Clone- Clone	h4b17	11.293	660.772	104.957	4095	18.275
Ecad MO N-C	Non Clone- Clone	h4b17	11.293	533.5	92.826	4095	18.275
Ecad MO N-C	Non Clone- Clone	h4b17	11.293	377.332	59.386	2713.945	18.275
Ecad MO N-C	Non Clone- Clone	h4b17	12.428	678.078	35.394	3956.89	20.119
Ecad MO N-C	Non Clone- Clone	h4b17	12.428	741.997	47.333	3496.259	20.119
Ecad MO N-C	Non Clone- Clone	h4b17	12.428	804.667	77.726	3742.358	20.119
Ecad MO N-C	Non Clone- Clone	h4b17	12.428	815.819	87.556	4095	20.119
Ecad MO N-C	Non Clone- Clone	h4b17	12.428	815.819	87.556	4095	20.119
Ecad MO N-C	Non Clone- Clone	h4b17	12.428	791.428	50.068	4053.235	20.119
Ecad MO N-N	Non Clone- Non Clone	h1b1	7.403	157.369	3.217	1024.959	11.949
Ecad MO N-N	Non Clone- Non Clone	h1b1	7.403	227.372	18.953	1448.651	11.949
Ecad MO N-N	Non Clone- Non Clone	h1b1	7.403	270.677	9.513	1696.878	11.949
Ecad MO N-N	Non Clone- Non Clone	h1b1	7.403	275.657	40.678	1619.587	11.949
Ecad MO N-N	Non Clone- Non Clone	h1b1	7.403	279.472	39.328	1837.8	11.949
Ecad MO N-N	Non Clone- Non Clone	h1b1	7.403	429.711	55.917	2303.267	11.949
Ecad MO N-N	Non Clone- Non Clone	h1b1	7.403	638.565	44.996	4095	11.949
Ecad MO N-N	Non Clone- Non Clone
Ecad MO N-N	Non Clone- Non Clone	h1b2	7.457	514.73	29.343	4090.659	12.036
Ecad MO N-N	Non Clone- Non Clone	h1b2	7.457	549.775	59.066	4095	12.036
Ecad MO N-N	Non Clone- Non Clone	h1b2	7.457	566.325	72.749	4074.77	12.036
Ecad MO N-N	Non Clone- Non Clone	h1b2	7.457	702.181	118.088	3188.348	12.036
Ecad MO N-N	Non Clone- Non Clone	h1b2	7.457	961.996	118.377	4065.081	12.036
Ecad MO N-N	Non Clone- Non Clone	h1b2	7.457	881.967	37.555	4095	12.036
Ecad MO N-N	Non Clone- Non Clone	h1b2	7.457	551.956	38.176	4095	12.036
Ecad MO N-N	Non Clone- Non Clone
Ecad MO N-N	Non Clone- Non Clone	h1b3	8.159	462.959	34.94	3770.915	13.179
Ecad MO N-N	Non Clone- Non Clone	h1b3	8.159	727.22	34.571	4094.757	13.179
Ecad MO N-N	Non Clone- Non Clone	h1b3	8.159	739.798	40.806	4072.462	13.179
Ecad MO N-N	Non Clone- Non Clone	h1b3	8.159	770.043	107.951	2571.612	13.179
Ecad MO N-N	Non Clone- Non Clone	h1b3	8.159	900.372	141.294	3483.588	13.179
Ecad MO N-N	Non Clone- Non Clone	h1b3	8.159	1030.79	85.279	4095	13.179
Ecad MO N-N	Non Clone- Non Clone
Ecad MO N-N	Non Clone- Non Clone	h1b4	8.916	677.201	34	3282.319	14.409
Ecad MO N-N	Non Clone- Non Clone	h1b4	8.916	773.242	58.433	3922.376	14.409
Ecad MO N-N	Non Clone- Non Clone	h1b4	8.916	1233.057	131.135	4015.845	14.409
Ecad MO N-N	Non Clone- Non Clone	h1b4	8.916	1014.893	127.121	3033.304	14.409
Ecad MO N-N	Non Clone- Non Clone	h1b4	8.916	665.032	51.804	2795.987	14.409
Ecad MO N-N	Non Clone- Non Clone	h1b4	8.916	593.261	31.003	2995.995	14.409
Ecad MO N-N	Non Clone- Non Clone	h1b4	8.916	476.376	11.397	4095	14.409
Ecad MO N-N	Non Clone- Non Clone
Ecad MO N-N	Non Clone- Non Clone	h1b5	9.294	709.498	82.955	4095	15.024
Ecad MO N-N	Non Clone- Non Clone	h1b5	9.294	1034.118	156.488	3690.177	15.024
Ecad MO N-N	Non Clone- Non Clone	h1b5	9.294	1402.129	138.281	4095	15.024
Ecad MO N-N	Non Clone- Non Clone	h1b5	9.294	1376.304	183.806	4095	15.024
Ecad MO N-N	Non Clone- Non Clone	h1b5	9.294	1299.285	109.375	4095	15.024
Ecad MO N-N	Non Clone- Non Clone
Ecad MO N-N	Non Clone- Non Clone	h1b6	6.16	952.564	52.247	3038.555	9.928
Ecad MO N-N	Non Clone- Non Clone	h1b6	6.16	757.352	170.868	3175.578	9.928
Ecad MO N-N	Non Clone- Non Clone	h1b6	6.16	1037.84	207.171	3281.998	9.928
Ecad MO N-N	Non Clone- Non Clone	h1b6	6.16	1628.586	355.897	4095	9.928
Ecad MO N-N	Non Clone- Non Clone	h1b6	6.16	1608.854	297.02	4095	9.928
Ecad MO N-N	Non Clone- Non Clone	h1b6	6.16	1287.682	242.222	4095	9.928
Ecad MO N-N	Non Clone- Non Clone
Ecad MO N-N	Non Clone- Non Clone	h1b7	9.456	568.149	10.432	1903.037	15.278
Ecad MO N-N	Non Clone- Non Clone	h1b7	9.456	788.533	36.912	4095	15.278
Ecad MO N-N	Non Clone- Non Clone	h1b7	9.456	1323.429	69.383	4095	15.278
Ecad MO N-N	Non Clone- Non Clone	h1b7	9.456	1283.152	74.276	4095	15.278
Ecad MO N-N	Non Clone- Non Clone	h1b7	9.456	847.544	141.504	3773.026	15.278
Ecad MO N-N	Non Clone- Non Clone	h1b7	9.456	610.024	93.502	4079.665	15.278
Ecad MO N-N	Non Clone- Non Clone
Ecad MO N-N	Non Clone- Non Clone	h1b8	10.699	691.543	16.907	3246.162	17.308
Ecad MO N-N	Non Clone- Non Clone	h1b8	10.699	733.54	46.832	4095	17.308
Ecad MO N-N	Non Clone- Non Clone	h1b8	10.699	1092.378	93.254	4095	17.308
Ecad MO N-N	Non Clone- Non Clone	h1b8	10.699	1345.971	98.746	4074.317	17.308
Ecad MO N-N	Non Clone- Non Clone	h1b8	10.699	1247.256	124.208	4095	17.308
Ecad MO N-N	Non Clone- Non Clone	h1b8	10.699	991.386	159.073	4072.194	17.308
Ecad MO N-N	Non Clone- Non Clone
Ecad MO N-N	Non Clone- Non Clone	h1b9	6.322	725.454	21.031	2946.612	10.192
Ecad MO N-N	Non Clone- Non Clone	h1b9	6.322	646.959	54.945	2748.017	10.192
Ecad MO N-N	Non Clone- Non Clone	h1b9	6.322	648.574	112.036	3933.708	10.192
Ecad MO N-N	Non Clone- Non Clone	h1b9	6.322	815.264	119.051	4095	10.192
Ecad MO N-N	Non Clone- Non Clone	h1b9	6.322	972.996	99.508	4095	10.192
Ecad MO N-N	Non Clone- Non Clone	h1b9	6.322	1204.174	169.412	4025.537	10.192
Ecad MO N-N	Non Clone- Non Clone
Ecad MO N-N	Non Clone- Non Clone	h1b10	8.754	970.58	86.206	4095	14.145
Ecad MO N-N	Non Clone- Non Clone	h1b10	8.754	1168.934	107.779	4095	14.145
Ecad MO N-N	Non Clone- Non Clone	h1b10	8.754	1025.249	151.565	3870.186	14.145
Ecad MO N-N	Non Clone- Non Clone	h1b10	8.754	1001.524	100.381	4079.154	14.145
Ecad MO N-N	Non Clone- Non Clone	h1b10	8.754	935.706	41.042	4085.7	14.145
Ecad MO N-N	Non Clone- Non Clone	h1b10	8.754	537.698	14.435	3699.767	14.145
Ecad MO N-N	Non Clone- Non Clone
Ecad MO N-N	Non Clone- Non Clone	h1b11	10.266	416.874	15.367	3753.415	16.605
Ecad MO N-N	Non Clone- Non Clone	h1b11	10.266	526.825	36.7	3814.358	16.605
Ecad MO N-N	Non Clone- Non Clone	h1b11	10.266	588.122	38.096	2353.82	16.605
Ecad MO N-N	Non Clone- Non Clone	h1b11	10.266	743.531	85.896	3993.205	16.605
Ecad MO N-N	Non Clone- Non Clone	h1b11	10.266	972.257	86.081	4092.187	16.605
Ecad MO N-N	Non Clone- Non Clone	h1b11	10.266	1104.636	95.4	3997.818	16.605
Ecad MO N-N	Non Clone- Non Clone
Ecad MO N-N	Non Clone- Non Clone	h1b12	7.241	691.877	39.477	2524.84	11.685
Ecad MO N-N	Non Clone- Non Clone	h1b12	7.241	602.025	53.465	2880.914	11.685
Ecad MO N-N	Non Clone- Non Clone	h1b12	7.241	520.962	49.383	3494.051	11.685
Ecad MO N-N	Non Clone- Non Clone	h1b12	7.241	528.899	26.183	4046.026	11.685
Ecad MO N-N	Non Clone- Non Clone	h1b12	7.241	589.066	42.574	4095	11.685
Ecad MO N-N	Non Clone- Non Clone	h1b12	7.241	811.967	68.5	4095	11.685
Ecad MO N-N	Non Clone- Non Clone	h3b1	15.022	364.506	0.524	2084.475	24.337
Ecad MO N-N	Non Clone- Non Clone	h3b1	15.022	437.733	2.76	2545.189	24.337
Ecad MO N-N	Non Clone- Non Clone	h3b1	15.022	520.147	11.817	2894.372	24.337
Ecad MO N-N	Non Clone- Non Clone	h3b1	15.022	562.827	10.213	4095	24.337
Ecad MO N-N	Non Clone- Non Clone	h3b1	15.022	543.472	12.895	4095	24.337
Ecad MO N-N	Non Clone- Non Clone
Ecad MO N-N	Non Clone- Non Clone	h3b2	6.592	575.165	25.836	2741.482	10.631
Ecad MO N-N	Non Clone- Non Clone	h3b2	6.592	713.086	84.165	2861.791	10.631
Ecad MO N-N	Non Clone- Non Clone	h3b2	6.592	738.509	90.374	2223.247	10.631
Ecad MO N-N	Non Clone- Non Clone	h3b2	6.592	832.82	227.078	2268.25	10.631
Ecad MO N-N	Non Clone- Non Clone	h3b2	6.592	1056.028	150.94	3471.003	10.631
Ecad MO N-N	Non Clone- Non Clone	h3b2	6.592	1064.573	158.401	4095	10.631
Ecad MO N-N	Non Clone- Non Clone	h3b2	6.592	897.456	123.312	4076.505	10.631
Ecad MO N-N	Non Clone- Non Clone
Ecad MO N-N	Non Clone- Non Clone	h3b3	6.862	611.398	27.741	3862.408	11.07
Ecad MO N-N	Non Clone- Non Clone	h3b3	6.862	615.572	60.959	3700.364	11.07
Ecad MO N-N	Non Clone- Non Clone	h3b3	6.862	692.882	83.159	2823.969	11.07
Ecad MO N-N	Non Clone- Non Clone	h3b3	6.862	994.9	52.152	3937.617	11.07
Ecad MO N-N	Non Clone- Non Clone	h3b3	6.862	951.086	50.541	4095	11.07
Ecad MO N-N	Non Clone- Non Clone	h3b3	6.862	774.339	40.128	4095	11.07
Ecad MO N-N	Non Clone- Non Clone
Ecad MO N-N	Non Clone- Non Clone	h3b4	14.157	386.265	7.929	2017.152	22.931
Ecad MO N-N	Non Clone- Non Clone	h3b4	14.157	428.455	1.139	3166.901	22.931
Ecad MO N-N	Non Clone- Non Clone	h3b4	14.157	468.961	11.234	3995.821	22.931
Ecad MO N-N	Non Clone- Non Clone	h3b4	14.157	484.918	42.359	4095	22.931
Ecad MO N-N	Non Clone- Non Clone	h3b4	14.157	526.409	15.771	4095	22.931
Ecad MO N-N	Non Clone- Non Clone	h3b4	14.157	534.436	17.145	3981.145	22.931
Ecad MO N-N	Non Clone- Non Clone
Ecad MO N-N	Non Clone- Non Clone	h3b5	11.779	515.113	24.421	4036.092	19.065
Ecad MO N-N	Non Clone- Non Clone	h3b5	11.779	590.031	28.925	4068.912	19.065
Ecad MO N-N	Non Clone- Non Clone	h3b5	11.779	711.136	76.059	4095	19.065
Ecad MO N-N	Non Clone- Non Clone	h3b5	11.779	980.893	84.404	4095	19.065
Ecad MO N-N	Non Clone- Non Clone	h3b5	11.779	1182.551	57.945	4095	19.065
Ecad MO N-N	Non Clone- Non Clone	h3b5	11.779	1119.162	91.388	4095	19.065
Ecad MO N-N	Non Clone- Non Clone	h3b5	11.779	932.529	86.289	4073.177	19.065
Ecad MO N-N	Non Clone- Non Clone
Ecad MO N-N	Non Clone- Non Clone	h3b6	6.43	737.27	61.199	4068.205	10.367
Ecad MO N-N	Non Clone- Non Clone	h3b6	6.43	903.553	78.527	4094.385	10.367
Ecad MO N-N	Non Clone- Non Clone	h3b6	6.43	890.407	43.768	3857.444	10.367
Ecad MO N-N	Non Clone- Non Clone	h3b6	6.43	898.774	98.923	3525.009	10.367
Ecad MO N-N	Non Clone- Non Clone	h3b6	6.43	989.218	65.854	4095	10.367
Ecad MO N-N	Non Clone- Non Clone	h3b6	6.43	702.38	15.087	4095	10.367
Ecad MO N-N	Non Clone- Non Clone
Ecad MO N-N	Non Clone- Non Clone	h3b7	13.887	549.322	12.793	1993.556	22.492
Ecad MO N-N	Non Clone- Non Clone	h3b7	13.887	591.657	27.533	2868.922	22.492
Ecad MO N-N	Non Clone- Non Clone	h3b7	13.887	586.854	58.964	2883.951	22.492
Ecad MO N-N	Non Clone- Non Clone	h3b7	13.887	626.753	81.736	2875.845	22.492
Ecad MO N-N	Non Clone- Non Clone	h3b7	13.887	691.446	66.024	4095	22.492
Ecad MO N-N	Non Clone- Non Clone	h3b7	13.887	522.943	38.64	2762.314	22.492
Ecad MO N-N	Non Clone- Non Clone	h4b1	8.916	883.722	12.196	3935.846	14.409
Ecad MO N-N	Non Clone- Non Clone	h4b1	8.916	992.212	17.396	4095	14.409
Ecad MO N-N	Non Clone- Non Clone	h4b1	8.916	901.458	11.064	4095	14.409
Ecad MO N-N	Non Clone- Non Clone	h4b1	8.916	801.442	31.537	4095	14.409
Ecad MO N-N	Non Clone- Non Clone	h4b1	8.916	833.196	36.113	4095	14.409
Ecad MO N-N	Non Clone- Non Clone	h4b1	8.916	946.374	42.395	4095	14.409
Ecad MO N-N	Non Clone- Non Clone	h4b1	8.916	979.321	51.373	4095	14.409
Ecad MO N-N	Non Clone- Non Clone	h4b1	8.916	1025.343	42.095	4094.596	14.409
Ecad MO N-N	Non Clone- Non Clone	h4b1	8.916	944.018	12.55	4076.987	14.409
Ecad MO N-N	Non Clone- Non Clone
Ecad MO N-N	Non Clone- Non Clone	h4b2	8.321	792.818	36.621	4095	13.442
Ecad MO N-N	Non Clone- Non Clone	h4b2	8.321	771.599	11.499	4095	13.442
Ecad MO N-N	Non Clone- Non Clone	h4b2	8.321	814.581	39.196	4095	13.442
Ecad MO N-N	Non Clone- Non Clone	h4b2	8.321	890.443	23.867	3811.043	13.442
Ecad MO N-N	Non Clone- Non Clone	h4b2	8.321	705.009	34.335	3908.897	13.442
Ecad MO N-N	Non Clone- Non Clone	h4b2	8.321	552.17	24.471	3096.173	13.442
Ecad MO N-N	Non Clone- Non Clone
Ecad MO N-N	Non Clone- Non Clone	h4b3	9.186	868.808	80.374	3727.137	14.848
Ecad MO N-N	Non Clone- Non Clone	h4b3	9.186	982.423	82.494	4095	14.848
Ecad MO N-N	Non Clone- Non Clone	h4b3	9.186	980.281	108.429	4095	14.848
Ecad MO N-N	Non Clone- Non Clone	h4b3	9.186	1024.887	151.875	4095	14.848
Ecad MO N-N	Non Clone- Non Clone	h4b3	9.186	1047.714	161.374	4095	14.848
Ecad MO N-N	Non Clone- Non Clone	h4b3	9.186	911.68	92.767	4095	14.848
Ecad MO N-N	Non Clone- Non Clone	h4b3	9.186	798.113	90.386	4095	14.848
Ecad MO N-N	Non Clone- Non Clone	h4b3	9.186	671.379	79.238	3164.506	14.848
