# Supplementary material for: Stepwise polarisation of developing bilayered epidermis is mediated by aPKC and E-cadherin in zebrafish
Source: eLife. 2020 Jan 22;9:e49064. doi: 10.7554/eLife.49064 (PMC6975926; doi:10.7554/eLife.49064)
Supplement: Figure 4—source data 2. [file elife-49064-fig4-data2.csv]

Genotype	Boundary	Cell name	Area	Mean	Min	Max	Length
Ctrl MO CO	Complete Overlap	h1b1	9.348	1889.716	331.228	4095	15.112
Ctrl MO CO	Complete Overlap	h1b1	9.348	1672.046	245.722	4095	15.112
Ctrl MO CO	Complete Overlap	h1b1	9.348	1276.583	126.127	4095	15.112
Ctrl MO CO	Complete Overlap	h1b1	9.348	890.326	90.684	3776.194	15.112
Ctrl MO CO	Complete Overlap	h1b1	9.348	724.711	51.757	4087.585	15.112
Ctrl MO CO	Complete Overlap
Ctrl MO CO	Complete Overlap	h1b2	8.213	1921.262	449.913	4095	13.267
Ctrl MO CO	Complete Overlap	h1b2	8.213	1430.307	276.216	4095	13.267
Ctrl MO CO	Complete Overlap	h1b2	8.213	886.459	174.004	3872.769	13.267
Ctrl MO CO	Complete Overlap	h1b2	8.213	613.795	73.582	4095	13.267
Ctrl MO CO	Complete Overlap	h1b2	8.213	449.223	65.933	4053.158	13.267
Ctrl MO CO	Complete Overlap
Ctrl MO CO	Complete Overlap	h1b3	6.052	1458.315	310.539	3866.8	9.752
Ctrl MO CO	Complete Overlap	h1b3	6.052	1409.08	246.097	4057.574	9.752
Ctrl MO CO	Complete Overlap	h1b3	6.052	1097.363	321.421	3300.22	9.752
Ctrl MO CO	Complete Overlap	h1b3	6.052	716.998	213.709	3711.205	9.752
Ctrl MO CO	Complete Overlap	h1b3	6.052	486.856	83.452	3407.068	9.752
Ctrl MO CO	Complete Overlap
Ctrl MO CO	Complete Overlap	h1b4	7.619	1985.888	299.187	4095	12.3
Ctrl MO CO	Complete Overlap	h1b4	7.619	2187.194	364.948	4095	12.3
Ctrl MO CO	Complete Overlap	h1b4	7.619	1732.281	271.742	4095	12.3
Ctrl MO CO	Complete Overlap	h1b4	7.619	1551.929	283.204	4095	12.3
Ctrl MO CO	Complete Overlap	h1b4	7.619	1219.96	193.531	4094.95	12.3
Ctrl MO CO	Complete Overlap	h1b4	7.619	756.036	156.88	4085.495	12.3
Ctrl MO CO	Complete Overlap
Ctrl MO CO	Complete Overlap	h1b5	4.701	1659.908	287.15	4095	7.556
Ctrl MO CO	Complete Overlap	h1b5	4.701	1590.979	288.747	4095	7.556
Ctrl MO CO	Complete Overlap	h1b5	4.701	1363.684	157.09	4095	7.556
Ctrl MO CO	Complete Overlap	h1b5	4.701	802.123	35.193	3025.029	7.556
Ctrl MO CO	Complete Overlap	h1b5	4.701	480.266	56.505	2912.286	7.556
Ctrl MO CO	Complete Overlap
Ctrl MO CO	Complete Overlap	h1b6	8.375	1208.735	134.926	4095	13.53
Ctrl MO CO	Complete Overlap	h1b6	8.375	1170.538	176.255	4095	13.53
Ctrl MO CO	Complete Overlap	h1b6	8.375	1064.563	126.571	4095	13.53
Ctrl MO CO	Complete Overlap	h1b6	8.375	911.828	101.248	4042.524	13.53
Ctrl MO CO	Complete Overlap	h1b6	8.375	738.984	91.851	4079.766	13.53
Ctrl MO CO	Complete Overlap	h1b6	8.375	472.958	55.444	3412.098	13.53
Ctrl MO CO	Complete Overlap	h1b6	8.375	298.629	64.3	1145.87	13.53
Ctrl MO CO	Complete Overlap
Ctrl MO CO	Complete Overlap	h1b7	9.24	874.102	93.78	4095	14.936
Ctrl MO CO	Complete Overlap	h1b7	9.24	944.57	89.361	4095	14.936
Ctrl MO CO	Complete Overlap	h1b7	9.24	819.323	101.776	4095	14.936
Ctrl MO CO	Complete Overlap	h1b7	9.24	741.069	78.718	4095	14.936
Ctrl MO CO	Complete Overlap	h1b7	9.24	709.406	75.782	4095	14.936
Ctrl MO CO	Complete Overlap	h1b7	9.24	579.275	31.353	3893.48	14.936
Ctrl MO CO	Complete Overlap
Ctrl MO CO	Complete Overlap	h1b8	7.078	1699.407	168.606	4095	11.422
Ctrl MO CO	Complete Overlap	h1b8	7.078	1714.51	149.002	4095	11.422
Ctrl MO CO	Complete Overlap	h1b8	7.078	1421.423	96.621	4092.013	11.422
Ctrl MO CO	Complete Overlap	h1b8	7.078	786.098	109.073	4095	11.422
Ctrl MO CO	Complete Overlap	h1b8	7.078	570.432	89.909	4088.636	11.422
Ctrl MO CO	Complete Overlap	h1b8	7.078	400.931	50.533	2000.897	11.422
Ctrl MO CO	Complete Overlap
Ctrl MO CO	Complete Overlap	h1b9	8.591	1754.214	286.521	4095	13.882
Ctrl MO CO	Complete Overlap	h1b9	8.591	1793.342	314.749	4095	13.882
Ctrl MO CO	Complete Overlap	h1b9	8.591	1453.1	348.405	4095	13.882
Ctrl MO CO	Complete Overlap	h1b9	8.591	712.089	129.135	3921.263	13.882
Ctrl MO CO	Complete Overlap	h1b9	8.591	442.898	68.141	2956.253	13.882
Ctrl MO CO	Complete Overlap
Ctrl MO CO	Complete Overlap	h1b10	8.483	1598.56	263.553	4095	13.706
Ctrl MO CO	Complete Overlap	h1b10	8.483	1708.099	256.377	4095	13.706
Ctrl MO CO	Complete Overlap	h1b10	8.483	1683.274	301.992	4095	13.706
Ctrl MO CO	Complete Overlap	h1b10	8.483	1357.627	191.106	4095	13.706
Ctrl MO CO	Complete Overlap	h1b10	8.483	648.274	118.243	2885.196	13.706
Ctrl MO CO	Complete Overlap	h1b10	8.483	428.183	65.825	1682.507	13.706
Ctrl MO CO	Complete Overlap	h1b10	8.483	288.509	28.191	1011.612	13.706
Ctrl MO CO	Complete Overlap
Ctrl MO CO	Complete Overlap	h1b11	7.511	1641.538	365.913	4095	12.125
Ctrl MO CO	Complete Overlap	h1b11	7.511	2000.949	334.857	4095	12.125
Ctrl MO CO	Complete Overlap	h1b11	7.511	1531.512	206.93	4081.383	12.125
Ctrl MO CO	Complete Overlap	h1b11	7.511	1100.963	299.463	4095	12.125
Ctrl MO CO	Complete Overlap	h1b11	7.511	823.251	163.783	4095	12.125
Ctrl MO CO	Complete Overlap
Ctrl MO CO	Complete Overlap	h1b12	4.917	989.784	238.164	2926.037	7.907
Ctrl MO CO	Complete Overlap	h1b12	4.917	626.064	117.38	2136.596	7.907
Ctrl MO CO	Complete Overlap	h1b12	4.917	436.425	135.98	1994.942	7.907
Ctrl MO CO	Complete Overlap	h1b12	4.917	263.199	65.456	1048.276	7.907
Ctrl MO CO	Complete Overlap
Ctrl MO CO	Complete Overlap	h1b13	2.702	1446.133	119.114	4095	4.305
Ctrl MO CO	Complete Overlap	h1b13	2.702	1162.326	245.369	4095	4.305
Ctrl MO CO	Complete Overlap	h1b13	2.702	879.118	141.619	4095	4.305
Ctrl MO CO	Complete Overlap	h1b13	2.702	652.215	96.185	3400.072	4.305
Ctrl MO CO	Complete Overlap
Ctrl MO CO	Complete Overlap	h1b14	3.188	1445.28	257.259	4095	5.096
Ctrl MO CO	Complete Overlap	h1b14	3.188	1129.166	148.431	4095	5.096
Ctrl MO CO	Complete Overlap	h1b14	3.188	816.866	122.904	3485.67	5.096
Ctrl MO CO	Complete Overlap	h1b14	3.188	552.037	73.829	2296.846	5.096
Ctrl MO CO	Complete Overlap	h1b14	3.188	333.942	65.319	1260.177	5.096
Ctrl MO CO	Complete Overlap
Ctrl MO CO	Complete Overlap	h1b15	9.726	1957.825	295.964	4095	15.727
Ctrl MO CO	Complete Overlap	h1b15	9.726	1993.597	360.812	4095	15.727
Ctrl MO CO	Complete Overlap	h1b15	9.726	1944.524	327.12	4095	15.727
Ctrl MO CO	Complete Overlap	h1b15	9.726	1719.607	293.376	4095	15.727
Ctrl MO CO	Complete Overlap	h1b15	9.726	1348.069	195.698	4094.212	15.727
Ctrl MO CO	Complete Overlap	h1b15	11.077	1013.473	231.592	3026.622	17.923
Ctrl MO CO	Complete Overlap	h1b15	11.077	817.256	145.895	3535.339	17.923
Ctrl MO CO	Complete Overlap	h1b15	11.077	697.148	97.729	3506.26	17.923
Ctrl MO CO	Complete Overlap	h1b15	11.077	570.032	55.875	4095	17.923
Ctrl MO CO	Complete Overlap
Ctrl MO CO	Complete Overlap	h1b16	10.861	2074.523	239.292	4095	17.572
Ctrl MO CO	Complete Overlap	h1b16	10.861	1952.023	191.508	4095	17.572
Ctrl MO CO	Complete Overlap	h1b16	10.861	1537.708	197.999	4095	17.572
Ctrl MO CO	Complete Overlap	h1b16	10.861	878.783	175.009	2605.172	17.572
Ctrl MO CO	Complete Overlap	h1b16	10.861	684.774	151.34	4082.417	17.572
Ctrl MO CO	Complete Overlap	h1b16	10.861	620.152	107.05	4095	17.572
Ctrl MO CO	Complete Overlap
Ctrl MO CO	Complete Overlap	h1b17	5.241	1645.462	264.479	4095	8.434
Ctrl MO CO	Complete Overlap	h1b17	5.241	1036.168	241.358	4095	8.434
Ctrl MO CO	Complete Overlap	h1b17	5.241	839.539	128.194	4095	8.434
Ctrl MO CO	Complete Overlap	h1b17	5.241	660.239	86.732	4086.467	8.434
Ctrl MO CO	Complete Overlap	h1b17	5.241	425.146	45.843	2137.088	8.434
Ctrl MO CO	Complete Overlap
Ctrl MO CO	Complete Overlap	h1b18	12.752	1661.712	127.38	4095	20.647
Ctrl MO CO	Complete Overlap	h1b18	12.752	1594.51	170.086	4095	20.647
Ctrl MO CO	Complete Overlap	h1b18	12.752	1236.625	101.841	4095	20.647
Ctrl MO CO	Complete Overlap	h1b18	12.752	1005.395	112.029	4095	20.647
Ctrl MO CO	Complete Overlap	h1b18	12.752	756.13	76.331	4095	20.647
Ctrl MO CO	Complete Overlap	h1b18	12.752	585.079	32.736	4095	20.647
Ctrl MO CO	Complete Overlap	h1b18	12.752	388.966	12.219	4074.066	20.647
Ctrl MO CO	Complete Overlap
Ctrl MO CO	Complete Overlap	h1b19	7.403	1697.252	269.018	4095	11.949
Ctrl MO CO	Complete Overlap	h1b19	7.403	1150.28	179.138	4008.745	11.949
Ctrl MO CO	Complete Overlap	h1b19	7.403	858.897	155.877	2890.736	11.949
Ctrl MO CO	Complete Overlap	h1b19	7.403	635.301	164.558	3560.244	11.949
Ctrl MO CO	Complete Overlap	h1b19	7.403	445.147	85.393	1791.548	11.949
Ctrl MO CO	Complete Overlap	h1b19	7.403	351.197	32.438	2098.858	11.949
Ctrl MO CO	Complete Overlap	h2b1	9.078	1227.246	263.616	4095	14.672
Ctrl MO CO	Complete Overlap	h2b1	9.078	780.566	144.392	3916.064	14.672
Ctrl MO CO	Complete Overlap	h2b1	9.078	512.084	110.596	3010.836	14.672
Ctrl MO CO	Complete Overlap
Ctrl MO CO	Complete Overlap	h2b2	14.805	2499.426	246.956	4095	23.985
Ctrl MO CO	Complete Overlap	h2b2	14.805	1974.31	283.301	4095	23.985
Ctrl MO CO	Complete Overlap	h2b2	14.805	1584.191	195.058	4095	23.985
Ctrl MO CO	Complete Overlap	h2b2	14.805	1343.663	78.751	4095	23.985
Ctrl MO CO	Complete Overlap	h2b2	14.805	1049.375	102.651	4095	23.985
Ctrl MO CO	Complete Overlap	h2b2	14.805	661.155	67.981	3606.491	23.985
Ctrl MO CO	Complete Overlap
Ctrl MO CO	Complete Overlap	h2b3	13.671	1975.538	131.155	4095	22.14
Ctrl MO CO	Complete Overlap	h2b3	13.671	1534.271	197.205	4095	22.14
Ctrl MO CO	Complete Overlap	h2b3	13.671	1122.334	147.065	4086.942	22.14
Ctrl MO CO	Complete Overlap	h2b3	13.671	731.575	143.771	3890.962	22.14
Ctrl MO CO	Complete Overlap	h2b3	13.671	431.984	36.091	3909.823	22.14
Ctrl MO CO	Complete Overlap
Ctrl MO CO	Complete Overlap	h2b4	5.457	2432.737	383.177	4095	8.786
Ctrl MO CO	Complete Overlap	h2b4	5.457	1791.385	238.751	4095	8.786
Ctrl MO CO	Complete Overlap	h2b4	5.457	1365.352	177.581	4095	8.786
Ctrl MO CO	Complete Overlap	h2b4	5.457	1034.216	219.457	4095	8.786
Ctrl MO CO	Complete Overlap	h2b4	5.457	812.868	189.162	4095	8.786
Ctrl MO CO	Complete Overlap	h2b4	5.457	512.565	102.042	1655.714	8.786
Ctrl MO CO	Complete Overlap
Ctrl MO CO	Complete Overlap	h2b5	7.078	2751.097	337.949	4095	11.42
Ctrl MO CO	Complete Overlap	h2b5	7.078	2646.558	125.74	4095	11.42
Ctrl MO CO	Complete Overlap	h2b5	7.078	2240.095	308.726	4095	11.42
Ctrl MO CO	Complete Overlap	h2b5	7.078	1521.809	369.44	4095	11.42
Ctrl MO CO	Complete Overlap	h2b5	7.078	824.353	273.424	2788.748	11.42
Ctrl MO CO	Complete Overlap	h2b5	7.078	532.304	100.537	2202.106	11.42
Ctrl MO CO	Complete Overlap
Ctrl MO CO	Complete Overlap	h2b6	6.484	1981.873	182.707	4095	10.455
Ctrl MO CO	Complete Overlap	h2b6	6.484	1289.297	182.018	4083.22	10.455
Ctrl MO CO	Complete Overlap	h2b6	6.484	878.562	150.756	3128.577	10.455
Ctrl MO CO	Complete Overlap	h2b6	6.484	605.705	70.266	4095	10.455
Ctrl MO CO	Complete Overlap	h3b1	7.078	2431.958	560.335	4095	11.422
Ctrl MO CO	Complete Overlap	h3b1	7.078	2651.473	384.909	4095	11.422
Ctrl MO CO	Complete Overlap	h3b1	7.078	2315.114	422.009	4095	11.422
Ctrl MO CO	Complete Overlap	h3b1	7.078	1127.788	271.473	3502.539	11.422
Ctrl MO CO	Complete Overlap	h3b1	7.078	678.382	153.961	2870.854	11.422
Ctrl MO CO	Complete Overlap	h3b1	7.078	516.937	66.922	2051.506	11.422
Ctrl MO CO	Complete Overlap
Ctrl MO CO	Complete Overlap	h3b2	7.349	2317.285	259.422	4095	11.861
Ctrl MO CO	Complete Overlap	h3b2	7.349	2552.1	277.532	4095	11.861
Ctrl MO CO	Complete Overlap	h3b2	7.349	1418.255	240.444	4082.936	11.861
Ctrl MO CO	Complete Overlap	h3b2	7.349	607.566	145.927	3349.348	11.861
Ctrl MO CO	Complete Overlap	h3b2	7.349	417.742	105.26	3636.44	11.861
Ctrl MO CO	Complete Overlap
Ctrl MO CO	Complete Overlap	h3b3	4.863	1765.543	143.314	4095	7.819
Ctrl MO CO	Complete Overlap	h3b3	4.863	1246.526	174.815	4095	7.819
Ctrl MO CO	Complete Overlap	h3b3	4.863	821.969	126.84	4095	7.819
Ctrl MO CO	Complete Overlap	h3b3	4.863	614.488	94.424	4095	7.819
Ctrl MO CO	Complete Overlap
Ctrl MO CO	Complete Overlap	h3b4	5.133	2265.536	196.804	4095	8.259
Ctrl MO CO	Complete Overlap	h3b4	5.133	1546.158	394.724	3710.531	8.259
Ctrl MO CO	Complete Overlap	h3b4	5.133	728.589	210.216	2026.663	8.259
Ctrl MO CO	Complete Overlap	h3b4	5.133	475.676	153.611	1978.489	8.259
Ctrl MO CO	Complete Overlap
Ctrl MO CO	Complete Overlap	h3b5	15.184	2107.392	275.276	4095	24.6
Ctrl MO CO	Complete Overlap	h3b5	15.184	2548.845	179.952	4095	24.6
Ctrl MO CO	Complete Overlap	h3b5	15.184	2379.308	175.498	4095	24.6
Ctrl MO CO	Complete Overlap	h3b5	15.184	1493.602	174.606	4095	24.6
Ctrl MO CO	Complete Overlap	h3b5	15.184	958.781	171.379	4095	24.6
Ctrl MO CO	Complete Overlap	h3b5	15.184	477.638	101.582	3117.711	24.6
Ctrl MO CO	Complete Overlap
Ctrl MO CO	Complete Overlap	h3b6	8.267	1716.026	56.779	4095	13.355
Ctrl MO CO	Complete Overlap	h3b6	8.267	1772.852	56.989	4095	13.355
Ctrl MO CO	Complete Overlap	h3b6	8.267	1101.88	45.238	4095	13.355
Ctrl MO CO	Complete Overlap	h3b6	8.267	689.41	76.709	4095	13.355
Ctrl MO CO	Complete Overlap	h3b6	8.267	522.226	47.653	4095	13.355
Ctrl MO CO	Complete Overlap
Ctrl MO CO	Complete Overlap	h3b7	10.969	1313.472	98.21	4095	17.747
Ctrl MO CO	Complete Overlap	h3b7	10.969	1546.859	65.754	4095	17.747
Ctrl MO CO	Complete Overlap	h3b7	10.969	1700.516	67.099	4095	17.747
Ctrl MO CO	Complete Overlap	h3b7	10.969	1467.119	68.041	4095	17.747
Ctrl MO CO	Complete Overlap	h3b7	10.969	662.18	86.119	3590.871	17.747
Ctrl MO CO	Complete Overlap	h3b7	10.969	369.773	30.215	2672.804	17.747
Ctrl MO CO	Complete Overlap	h3b7	10.969	273.403	16.814	2142.398	17.747
Ctrl MO CO	Complete Overlap
Ctrl MO CO	Complete Overlap	h3b8	6.97	1270.036	235.379	4095	11.246
Ctrl MO CO	Complete Overlap	h3b8	6.97	1385.984	240.22	4095	11.246
Ctrl MO CO	Complete Overlap	h3b8	6.97	1424.193	161.205	4095	11.246
Ctrl MO CO	Complete Overlap	h3b8	6.97	956.882	122.845	3706.587	11.246
Ctrl MO CO	Complete Overlap	h3b8	6.97	515.119	93.628	1524.988	11.246
Ctrl MO CO	Complete Overlap	h3b8	6.97	379.872	83.921	1650.104	11.246
Ctrl MO CO	Complete Overlap
Ctrl MO CO	Complete Overlap	h3b9	10.537	1941.315	69.347	4095	17.045
Ctrl MO CO	Complete Overlap	h3b9	10.537	1738.171	93.411	4095	17.045
Ctrl MO CO	Complete Overlap	h3b9	10.537	704.069	103.942	2352.488	17.045
Ctrl MO CO	Complete Overlap	h3b9	10.537	447.619	108.409	3650.713	17.045
Ctrl MO CO	Complete Overlap	h3b9	10.537	386.58	48.476	1977.077	17.045
Ctrl MO CO	Complete Overlap
Ctrl MO CO	Complete Overlap	h3b10	11.347	1244.916	88.555	4095	18.362
Ctrl MO CO	Complete Overlap	h3b10	11.347	1429.944	29.313	4095	18.362
Ctrl MO CO	Complete Overlap	h3b10	11.347	1133.831	118.06	4039.576	18.362
Ctrl MO CO	Complete Overlap	h3b10	11.347	751.779	105.857	3919.362	18.362
Ctrl MO CO	Complete Overlap	h3b10	11.347	625.109	95.785	4095	18.362
Ctrl MO CO	Complete Overlap
Ctrl MO CO	Complete Overlap	h3b11	9.294	1702.092	182.816	4095	15.024
Ctrl MO CO	Complete Overlap	h3b11	9.294	2080.644	176.948	4095	15.024
Ctrl MO CO	Complete Overlap	h3b11	9.294	1413.169	223.175	4087.169	15.024
Ctrl MO CO	Complete Overlap	h3b11	9.294	738.082	66.63	3797.2	15.024
Ctrl MO CO	Complete Overlap	h3b11	9.294	503.683	73.288	3343.23	15.024
Ctrl MO CO	Complete Overlap	h4b1	7.673	2173.352	251.646	4095	12.388
Ctrl MO CO	Complete Overlap	h4b1	7.673	2157.912	393.389	4095	12.388
Ctrl MO CO	Complete Overlap	h4b1	7.673	1826.255	417.471	4095	12.388
Ctrl MO CO	Complete Overlap	h4b1	7.673	1446.455	262.759	4093.482	12.388
Ctrl MO CO	Complete Overlap	h4b1	7.673	939.968	135.951	3626.259	12.388
Ctrl MO CO	Complete Overlap	h4b1	7.673	521.669	61.623	4054.788	12.388
Ctrl MO CO	Complete Overlap
Ctrl MO CO	Complete Overlap	h4b2	10.375	1922.071	285.819	4095	16.778
Ctrl MO CO	Complete Overlap	h4b2	10.375	1696.941	309.56	4095	16.778
Ctrl MO CO	Complete Overlap	h4b2	10.375	1479.477	354.476	4095	16.778
Ctrl MO CO	Complete Overlap	h4b2	10.375	1224.086	245.475	4095	16.778
Ctrl MO CO	Complete Overlap	h4b2	10.375	998.99	114.982	4095	16.778
Ctrl MO CO	Complete Overlap	h4b2	10.375	872.396	23.148	4048.814	16.778
Ctrl MO CO	Complete Overlap	h4b2	10.375	741.416	7.713	4072.786	16.778
Ctrl MO CO	Complete Overlap
Ctrl MO CO	Complete Overlap	h4b3	8.321	2142.416	293.49	4095	13.442
Ctrl MO CO	Complete Overlap	h4b3	8.321	1893.568	294.573	4095	13.442
Ctrl MO CO	Complete Overlap	h4b3	8.321	1632.664	246.201	4095	13.442
Ctrl MO CO	Complete Overlap	h4b3	8.321	1469.84	138.865	4095	13.442
Ctrl MO CO	Complete Overlap	h4b3	8.321	1409.315	159.777	4095	13.442
Ctrl MO CO	Complete Overlap	h4b3	8.321	1237.349	147.255	4095	13.442
Ctrl MO CO	Complete Overlap	h4b3	8.321	937.717	102.751	4042.354	13.442
Ctrl MO CO	Complete Overlap	h4b3	8.321	732.836	60.061	3950.608	13.442
Ctrl MO CO	Complete Overlap
Ctrl MO CO	Complete Overlap	h4b4	9.078	1568.493	208.389	4095	14.672
Ctrl MO CO	Complete Overlap	h4b4	9.078	1668.943	223.895	4095	14.672
Ctrl MO CO	Complete Overlap	h4b4	9.078	1771.273	185.49	4095	14.672
Ctrl MO CO	Complete Overlap	h4b4	9.078	1794.238	172.075	4095	14.672
Ctrl MO CO	Complete Overlap	h4b4	9.078	1700.89	159.61	4095	14.672
Ctrl MO CO	Complete Overlap	h4b4	9.078	1278.623	107.453	4095	14.672
Ctrl MO CO	Complete Overlap	h4b4	9.078	979.132	101.475	4070.454	14.672
Ctrl MO CO	Complete Overlap
Ctrl MO CO	Complete Overlap	h4b5	5.079	1665.801	200.618	4095	8.171
Ctrl MO CO	Complete Overlap	h4b5	5.079	1446.817	301.118	4095	8.171
Ctrl MO CO	Complete Overlap	h4b5	5.079	1159.728	193.288	4095	8.171
Ctrl MO CO	Complete Overlap	h4b5	5.079	942.761	105.084	4095	8.171
Ctrl MO CO	Complete Overlap	h4b5	5.079	755.699	62.283	4095	8.171
Ctrl MO CO	Complete Overlap	h4b5	5.079	482.11	18.731	4095	8.171
Ctrl MO CO	Complete Overlap
Ctrl MO CO	Complete Overlap	h4b6	10.699	2187.955	395.02	4095	17.301
Ctrl MO CO	Complete Overlap	h4b6	10.699	2110.318	363.208	4095	17.301
Ctrl MO CO	Complete Overlap	h4b6	10.699	1472.242	280.223	4095	17.301
Ctrl MO CO	Complete Overlap	h4b6	10.699	708.077	117.083	3591.656	17.301
Ctrl MO CO	Complete Overlap	h4b6	10.699	488.312	53.723	2674.509	17.301
Ctrl MO CO	Complete Overlap	h4b6	10.699	318.219	36.009	1529.381	17.301
Ctrl MO CO	Complete Overlap
Ctrl MO CO	Complete Overlap	h4b7	8.267	2137.743	311.102	4095	13.355
Ctrl MO CO	Complete Overlap	h4b7	8.267	2130.872	482.357	4095	13.355
Ctrl MO CO	Complete Overlap	h4b7	8.267	1842.853	451.342	4095	13.355
Ctrl MO CO	Complete Overlap	h4b7	8.267	1460.995	359.726	4095	13.355
Ctrl MO CO	Complete Overlap	h4b7	8.267	979.414	170.284	4095	13.355
Ctrl MO CO	Complete Overlap	h4b7	8.267	596.032	87.721	4038.11	13.355
Ctrl MO CO	Complete Overlap	h4b7	8.267	436.166	47.907	3304.285	13.355
Ctrl MO CO	Complete Overlap
Ctrl MO CO	Complete Overlap	h4b8	10.753	2664.982	450.158	4095	17.395
Ctrl MO CO	Complete Overlap	h4b8	10.753	2663.56	309.584	4095	17.395
Ctrl MO CO	Complete Overlap	h4b8	10.753	2567.257	220.165	4095	17.395
Ctrl MO CO	Complete Overlap	h4b8	10.753	1738.25	216.907	4095	17.395
Ctrl MO CO	Complete Overlap	h4b8	10.753	710.33	120.902	4095	17.395
Ctrl MO CO	Complete Overlap	h4b8	10.753	420.647	57.477	1841.03	17.395
Ctrl MO CO	Complete Overlap
Ctrl MO CO	Complete Overlap	h4b9	8.321	2143.166	319.513	4095	13.442
Ctrl MO CO	Complete Overlap	h4b9	8.321	2212.572	337.948	4095	13.442
Ctrl MO CO	Complete Overlap	h4b9	8.321	1693.357	299.903	4095	13.442
Ctrl MO CO	Complete Overlap	h4b9	8.321	945.823	215.445	3643.477	13.442
Ctrl MO CO	Complete Overlap	h4b9	8.321	477.557	53.157	2640.51	13.442
Ctrl MO CO	Complete Overlap	h4b9	8.321	373.883	50.061	2941.442	13.442
Ctrl MO CO	Complete Overlap
Ctrl MO CO	Complete Overlap	h4b10	8.159	1935.249	216.262	4095	13.179
Ctrl MO CO	Complete Overlap	h4b10	8.159	1538.001	146.335	4095	13.179
Ctrl MO CO	Complete Overlap	h4b10	8.159	816.6	105.48	3605.112	13.179
Ctrl MO CO	Complete Overlap	h4b10	8.159	589.44	96.572	2648.92	13.179
Ctrl MO CO	Complete Overlap	h4b10	8.159	409.61	45.619	3294.64	13.179
Ctrl MO CO	Complete Overlap
Ctrl MO CO	Complete Overlap	h4b11	7.349	2762.214	650.212	4095	11.861
Ctrl MO CO	Complete Overlap	h4b11	7.349	2523.309	619.261	4095	11.861
Ctrl MO CO	Complete Overlap	h4b11	7.349	2051.489	550.11	4095	11.861
Ctrl MO CO	Complete Overlap	h4b11	7.349	1367.471	352.221	4095	11.861
Ctrl MO CO	Complete Overlap	h4b11	7.349	910.733	226.742	4095	11.861
Ctrl MO CO	Complete Overlap	h4b11	7.349	700.72	182.606	4071.244	11.861
Ctrl MO CO	Complete Overlap
Ctrl MO CO	Complete Overlap	h4b12	5.782	1455.231	91.586	4095	9.313
Ctrl MO CO	Complete Overlap	h4b12	5.782	1057.233	124.456	3284.548	9.313
Ctrl MO CO	Complete Overlap	h4b12	5.782	653.868	93.092	2261.167	9.313
Ctrl MO CO	Complete Overlap	h4b12	5.782	514.614	57.547	2310.543	9.313
Ctrl MO CO	Complete Overlap	h4b12	5.782	443.235	67.667	2476.053	9.313
Ctrl MO PO	Partial Overlap	h1b1	8.645	1331.593	126.594	4095	13.97
Ctrl MO PO	Partial Overlap	h1b1	8.645	1390.935	166.071	4095	13.97
Ctrl MO PO	Partial Overlap	h1b1	8.645	1434.257	281.621	4095	13.97
Ctrl MO PO	Partial Overlap	h1b1	8.645	1373.814	298.076	4095	13.97
Ctrl MO PO	Partial Overlap	h1b1	8.645	1254.462	263.637	4095	13.97
Ctrl MO PO	Partial Overlap
Ctrl MO PO	Partial Overlap	h1b2	5.457	1632.421	245.106	4095	8.768
Ctrl MO PO	Partial Overlap	h1b2	5.457	1811.505	318.056	4095	8.768
Ctrl MO PO	Partial Overlap	h1b2	5.457	1888.663	361.499	4095	8.768
Ctrl MO PO	Partial Overlap	h1b2	5.457	1717.858	270.071	4087.592	8.768
Ctrl MO PO	Partial Overlap	h1b2	11.023	1772.195	352.697	4095	17.835
Ctrl MO PO	Partial Overlap	h1b2	11.023	1287.179	166.67	4095	17.835
Ctrl MO PO	Partial Overlap	h1b2	11.023	983.422	119.928	4095	17.835
Ctrl MO PO	Partial Overlap	h1b2	11.023	773.065	86.501	4095	17.835
Ctrl MO PO	Partial Overlap
Ctrl MO PO	Partial Overlap	h1b3	11.185	2131.066	204.401	4095	18.036
Ctrl MO PO	Partial Overlap	h1b3	11.185	1769.123	192.874	4095	18.036
Ctrl MO PO	Partial Overlap	h1b3	11.185	860.998	183.301	3174.369	18.036
Ctrl MO PO	Partial Overlap	h1b3	11.185	696.639	98.767	4095	18.036
Ctrl MO PO	Partial Overlap	h1b3	11.185	642.528	138.87	4095	18.036
Ctrl MO PO	Partial Overlap	h1b3	11.185	600.38	71.4	4095	18.036
Ctrl MO PO	Partial Overlap
Ctrl MO PO	Partial Overlap	h1b4	9.24	1668.014	161.616	4095	14.936
Ctrl MO PO	Partial Overlap	h1b4	9.24	1392.373	160.54	4095	14.936
Ctrl MO PO	Partial Overlap	h1b4	9.24	916.437	59.068	4034.531	14.936
Ctrl MO PO	Partial Overlap	h1b4	9.24	695.353	42.702	3655.803	14.936
Ctrl MO PO	Partial Overlap	h1b4	9.24	525.024	32.208	2952.522	14.936
Ctrl MO PO	Partial Overlap
Ctrl MO PO	Partial Overlap
Ctrl MO PO	Partial Overlap	h1b5	8.862	1390.27	141.789	4095	14.321
Ctrl MO PO	Partial Overlap	h1b5	8.862	1178.904	172.552	4087.149	14.321
Ctrl MO PO	Partial Overlap	h1b5	8.862	663.424	91.974	3997.18	14.321
Ctrl MO PO	Partial Overlap	h1b5	8.862	533.263	61.523	3857.683	14.321
Ctrl MO PO	Partial Overlap	h1b5	8.862	393.888	20.541	4022.425	14.321
Ctrl MO PO	Partial Overlap	h1b5	8.862	234.656	10.209	1359.128	14.321
Ctrl MO PO	Partial Overlap
Ctrl MO PO	Partial Overlap	h1b6	10.375	1580.761	129.07	4095	16.781
Ctrl MO PO	Partial Overlap	h1b6	10.375	1249.345	90.652	4095	16.781
Ctrl MO PO	Partial Overlap	h1b6	10.375	946.314	66.868	4095	16.781
Ctrl MO PO	Partial Overlap	h1b6	10.375	645.929	64.169	4095	16.781
Ctrl MO PO	Partial Overlap	h1b6	10.375	413.01	17.479	3929.375	16.781
Ctrl MO PO	Partial Overlap
Ctrl MO PO	Partial Overlap	h1b7	5.133	1870.089	408.82	4095	8.259
Ctrl MO PO	Partial Overlap	h1b7	5.133	1894.144	299.406	4095	8.259
Ctrl MO PO	Partial Overlap	h1b7	5.133	1030.49	212.513	3236.4	8.259
Ctrl MO PO	Partial Overlap	h1b7	5.133	763.466	105.629	2080.999	8.259
Ctrl MO PO	Partial Overlap	h1b7	5.133	535.766	69.336	1792.408	8.259
Ctrl MO PO	Partial Overlap	h1b7	5.133	281.953	46.988	1186.381	8.259
Ctrl MO PO	Partial Overlap
Ctrl MO PO	Partial Overlap	h1b8	9.186	1513.49	163.235	4095	14.848
Ctrl MO PO	Partial Overlap	h1b8	9.186	1300.746	171.901	4095	14.848
Ctrl MO PO	Partial Overlap	h1b8	9.186	1054.311	200.383	4095	14.848
Ctrl MO PO	Partial Overlap	h1b8	9.186	844.301	100.334	4095	14.848
Ctrl MO PO	Partial Overlap	h1b8	9.186	702.201	97.363	4059.171	14.848
Ctrl MO PO	Partial Overlap	h1b8	9.186	492.949	73.094	1926.047	14.848
Ctrl MO PO	Partial Overlap
Ctrl MO PO	Partial Overlap	h1b9	8.591	1796.872	179.524	4095	13.882
Ctrl MO PO	Partial Overlap	h1b9	8.591	1556.218	216.971	4095	13.882
Ctrl MO PO	Partial Overlap	h1b9	8.591	1085.486	150.768	4073.016	13.882
Ctrl MO PO	Partial Overlap	h1b9	8.591	721.555	109.02	3878.71	13.882
Ctrl MO PO	Partial Overlap	h1b9	8.591	619.992	83.606	4095	13.882
Ctrl MO PO	Partial Overlap	h1b9	8.591	495.84	52.751	4095	13.882
Ctrl MO PO	Partial Overlap	h2b1	7.349	2353.008	219.633	4095	11.861
Ctrl MO PO	Partial Overlap	h2b1	7.349	2140.525	200.455	4095	11.861
Ctrl MO PO	Partial Overlap	h2b1	7.349	1597.803	246.522	4086.875	11.861
Ctrl MO PO	Partial Overlap	h2b1	7.349	840.27	179.219	2423.231	11.861
Ctrl MO PO	Partial Overlap	h2b1	7.349	401.367	75.143	999.415	11.861
Ctrl MO PO	Partial Overlap
Ctrl MO PO	Partial Overlap	h2b2	11.779	1369.257	182.863	4095	19.065
Ctrl MO PO	Partial Overlap	h2b2	11.779	1335.652	183.233	4095	19.065
Ctrl MO PO	Partial Overlap	h2b2	11.779	1257.323	131.379	4095	19.065
Ctrl MO PO	Partial Overlap	h2b2	11.779	1107.239	142.647	4095	19.065
Ctrl MO PO	Partial Overlap	h2b2	11.779	890.004	60.98	4095	19.065
Ctrl MO PO	Partial Overlap
Ctrl MO PO	Partial Overlap	h2b3	11.563	2017.572	144.662	4095	18.714
Ctrl MO PO	Partial Overlap	h2b3	11.563	1975.67	271.089	4095	18.714
Ctrl MO PO	Partial Overlap	h2b3	11.563	1775.704	251.097	4095	18.714
Ctrl MO PO	Partial Overlap	h2b3	11.563	1632.097	260.433	4095	18.714
Ctrl MO PO	Partial Overlap	h2b3	11.563	1601.238	265.094	4095	18.714
Ctrl MO PO	Partial Overlap	h2b3	11.563	1677.448	167.227	4095	18.714
Ctrl MO PO	Partial Overlap	h2b3	11.563	1479.169	186.849	4095	18.714
Ctrl MO PO	Partial Overlap	h2b3	11.563	1141.16	101.666	4094.462	18.714
Ctrl MO PO	Partial Overlap	h2b3	11.563	732.441	66.061	3755.094	18.714
Ctrl MO PO	Partial Overlap	h3b1	7.457	1814.29	37.272	4095	12.037
Ctrl MO PO	Partial Overlap	h3b1	7.457	1718.095	96.352	4095	12.037
Ctrl MO PO	Partial Overlap	h3b1	7.457	1232.882	173.986	4095	12.037
Ctrl MO PO	Partial Overlap	h3b1	8.051	1710.175	102.028	4095	13.003
Ctrl MO PO	Partial Overlap	h3b1	8.051	1408.036	108.676	4095	13.003
Ctrl MO PO	Partial Overlap	h3b1	8.051	839.035	108.949	4095	13.003
Ctrl MO PO	Partial Overlap	h3b1	8.051	679.022	120.68	4095	13.003
Ctrl MO PO	Partial Overlap
Ctrl MO PO	Partial Overlap	h3b2	6.754	1414.171	219.283	4095	10.894
Ctrl MO PO	Partial Overlap	h3b2	6.754	1839.369	244.332	4095	10.894
Ctrl MO PO	Partial Overlap	h3b2	6.754	1208.993	135.268	4095	10.894
Ctrl MO PO	Partial Overlap	h3b2	6.754	499.135	31.033	1464.472	10.894
Ctrl MO PO	Partial Overlap	h3b2	6.754	324.951	79.612	776.531	10.894
Ctrl MO PO	Partial Overlap	h3b2	6.754	208.313	31.335	587.115	10.894
Ctrl MO PO	Partial Overlap
Ctrl MO PO	Partial Overlap	h3b3	8.267	2325.257	390.688	4095	13.355
Ctrl MO PO	Partial Overlap	h3b3	8.267	2037.178	191.434	4095	13.355
Ctrl MO PO	Partial Overlap	h3b3	8.267	1350.441	283.108	4095	13.355
Ctrl MO PO	Partial Overlap	h3b3	8.267	1065.933	218.031	3473.189	13.355
Ctrl MO PO	Partial Overlap	h3b3	8.267	903.291	87.948	3621.465	13.355
Ctrl MO PO	Partial Overlap
Ctrl MO PO	Partial Overlap	h3b4	11.617	1225.254	101.775	4095	18.802
Ctrl MO PO	Partial Overlap	h3b4	11.617	1405.791	66.575	4095	18.802
Ctrl MO PO	Partial Overlap	h3b4	11.617	1167.901	26.323	4095	18.802
Ctrl MO PO	Partial Overlap	h3b4	11.617	807.346	66.965	3178.082	18.802
Ctrl MO PO	Partial Overlap	h3b4	11.617	503.305	52.759	3006.279	18.802
Ctrl MO PO	Partial Overlap	h3b4	11.617	325.138	39.97	2390.484	18.802
Ctrl MO PO	Partial Overlap
Ctrl MO PO	Partial Overlap	h3b5	15.346	2629.291	331.564	4095	24.864
Ctrl MO PO	Partial Overlap	h3b5	15.346	2484.24	336.845	4095	24.864
Ctrl MO PO	Partial Overlap	h3b5	15.346	1538.711	264.897	4095	24.864
Ctrl MO PO	Partial Overlap	h3b5	15.346	967.275	247.09	4095	24.864
Ctrl MO PO	Partial Overlap	h3b5	15.346	473.889	108.305	3054.699	24.864
Ctrl MO PO	Partial Overlap	h3b5	15.346	211.66	37.312	1413.39	24.864
Ctrl MO PO	Partial Overlap	h4b1	7.241	2734.573	480.365	4095	11.685
Ctrl MO PO	Partial Overlap	h4b1	7.241	2056.139	284.897	4095	11.685
Ctrl MO PO	Partial Overlap	h4b1	7.241	1435.097	102.544	4095	11.685
Ctrl MO PO	Partial Overlap	h4b1	7.241	1085.68	74.757	4046.307	11.685
Ctrl MO PO	Partial Overlap	h4b1	7.241	715.955	31.385	2877.761	11.685
Ctrl MO PO	Partial Overlap	h4b1	7.241	532.1	36.197	3783.57	11.685
Ctrl MO PO	Partial Overlap	h4b1	7.241	317.631	22.025	1537.956	11.685
Ctrl MO PO	Partial Overlap
Ctrl MO PO	Partial Overlap	h4b2	5.187	2312.718	232.751	4095	8.347
Ctrl MO PO	Partial Overlap	h4b2	5.187	1833.972	194.443	4095	8.347
Ctrl MO PO	Partial Overlap	h4b2	5.187	1358.918	198.974	4085.975	8.347
Ctrl MO PO	Partial Overlap	h4b2	5.187	859.678	37.209	3835.946	8.347
Ctrl MO PO	Partial Overlap	h4b2	5.187	552.885	7.21	3090.95	8.347
Ctrl MO PO	Partial Overlap
Ctrl MO PO	Partial Overlap	h4b3	11.725	1962.446	281.152	4095	18.974
Ctrl MO PO	Partial Overlap	h4b3	11.725	1772.326	258.089	4095	18.974
Ctrl MO PO	Partial Overlap	h4b3	11.725	1175.201	67.982	4095	18.974
Ctrl MO PO	Partial Overlap	h4b3	11.725	951.357	93.555	4095	18.974
Ctrl MO PO	Partial Overlap	h4b3	11.725	691.902	54.776	2955.73	18.974
Ctrl MO PO	Partial Overlap	h4b3	11.725	459.287	48.69	3778.386	18.974
Ctrl MO PO	Partial Overlap	h4b3	11.725	261.788	18.848	2706.022	18.974
Ctrl MO PO	Partial Overlap
Ctrl MO PO	Partial Overlap	h4b4	10.05	1455.921	105.102	4095	16.254
Ctrl MO PO	Partial Overlap	h4b4	10.05	1300.027	116.847	4095	16.254
Ctrl MO PO	Partial Overlap	h4b4	10.05	831.703	44.991	4083.54	16.254
Ctrl MO PO	Partial Overlap	h4b4	10.05	670.229	24.254	4095	16.254
Ctrl MO PO	Partial Overlap	h4b4	10.05	581.779	19.402	4095	16.254
Ctrl MO PO	Partial Overlap	h4b4	10.05	555.28	2.751	4095	16.254
Ctrl MO PO	Partial Overlap	h4b4	10.05	388.05	2.096	4095	16.254
Ctrl MO PO	Partial Overlap
Ctrl MO PO	Partial Overlap	h4b5	8.267	978.937	135.916	4095	13.354
Ctrl MO PO	Partial Overlap	h4b5	8.267	1009.957	38.451	4095	13.354
Ctrl MO PO	Partial Overlap	h4b5	8.267	959.739	32.131	4095	13.354
Ctrl MO PO	Partial Overlap	h4b5	8.267	890.242	55.757	4095	13.354
Ctrl MO PO	Partial Overlap	h4b5	8.267	728.502	41.805	4058.408	13.354
Ctrl MO PO	Partial Overlap	h4b5	8.267	672.45	22.275	4095	13.354
Ctrl MO PO	Partial Overlap	h4b5	8.267	685.041	38.369	4095	13.354
Ctrl MO PO	Partial Overlap
Ctrl MO PO	Partial Overlap	h4b6	11.131	1552.054	188.277	4095	18.011
Ctrl MO PO	Partial Overlap	h4b6	11.131	1393.976	216.595	4095	18.011
Ctrl MO PO	Partial Overlap	h4b6	11.131	1219.616	165.913	4095	18.011
Ctrl MO PO	Partial Overlap	h4b6	11.131	1041.733	126.612	4095	18.011
Ctrl MO PO	Partial Overlap	h4b6	11.131	895.318	145.146	4095	18.011
Ctrl MO PO	Partial Overlap	h4b6	11.131	804.873	97.702	4095	18.011
Ctrl MO PO	Partial Overlap	h4b6	11.131	774.551	83.389	4084.914	18.011
Ctrl MO PO	Partial Overlap
Ctrl MO PO	Partial Overlap	h4b7	9.294	1957.224	146.062	4095	15.021
Ctrl MO PO	Partial Overlap	h4b7	9.294	2316.598	83.873	4095	15.021
Ctrl MO PO	Partial Overlap	h4b7	9.294	2203.865	113.094	4095	15.021
Ctrl MO PO	Partial Overlap	h4b7	9.294	1756.822	114.433	4095	15.021
Ctrl MO PO	Partial Overlap	h4b7	9.294	1445.026	79.497	4095	15.021
Ctrl MO PO	Partial Overlap	h4b7	9.294	905.887	37.307	3960.548	15.021
Ctrl MO PO	Partial Overlap	h4b7	9.294	606.437	38.858	3704.509	15.021
Ctrl MO PO	Partial Overlap	h4b7	9.294	349.916	23.485	2842.117	15.021
Ctrl MO NO	No Overlap	h2b1	12.86	1877.133	111.772	4095	20.822
Ctrl MO NO	No Overlap	h2b1	12.86	1593.821	199.025	4095	20.822
Ctrl MO NO	No Overlap	h2b1	12.86	1223.319	145.186	4095	20.822
Ctrl MO NO	No Overlap	h2b1	12.86	1003.529	98.342	4095	20.822
Ctrl MO NO	No Overlap	h2b1	12.86	768.602	66.173	4095	20.822
Ctrl MO NO	No Overlap
Ctrl MO NO	No Overlap	h2b2	14.481	2234.047	348.958	4095	23.458
Ctrl MO NO	No Overlap	h2b2	14.481	2056.255	178.847	4095	23.458
Ctrl MO NO	No Overlap	h2b2	14.481	1576.556	248.408	4095	23.458
Ctrl MO NO	No Overlap	h2b2	14.481	1137.317	154.14	4095	23.458
Ctrl MO NO	No Overlap	h2b2	14.481	685.66	70.387	4095	23.458
Ctrl MO NO	No Overlap	h2b2	14.481	378.226	37.824	2974.551	23.458
Ctrl MO NO	No Overlap
Ctrl MO NO	No Overlap	h2b3	9.834	2037.986	320.664	4095	15.902
Ctrl MO NO	No Overlap	h2b3	9.834	1584.307	400.659	4095	15.902
Ctrl MO NO	No Overlap	h2b3	9.834	1203.71	316.137	4095	15.902
Ctrl MO NO	No Overlap	h2b3	9.834	926.259	192.706	3035.943	15.902
Ctrl MO NO	No Overlap	h2b3	9.834	630.072	139.858	3134.923	15.902
Ctrl MO NO	No Overlap	h2b3	9.834	358.874	68.4	3661.208	15.902
Ctrl MO NO	No Overlap
Ctrl MO NO	No Overlap	h2b4	10.969	2150.286	329.506	4095	17.747
Ctrl MO NO	No Overlap	h2b4	10.969	2452.445	157.79	4095	17.747
Ctrl MO NO	No Overlap	h2b4	10.969	2198.925	187.723	4095	17.747
Ctrl MO NO	No Overlap	h2b4	10.969	1776.277	255.336	4095	17.747
Ctrl MO NO	No Overlap	h2b4	10.969	1116.632	133.064	4072.284	17.747
Ctrl MO NO	No Overlap	h2b4	10.969	517.8	50.078	1972.985	17.747
Ctrl MO NO	No Overlap	h2b4	10.969	274.388	10.528	1219.643	17.747
Ctrl MO NO	No Overlap	h2b4	10.969	228.858	18.222	1059.036	17.747
Ctrl MO NO	No Overlap
Ctrl MO NO	No Overlap	h2b5	6.376	1836.949	385.653	4095	10.279
Ctrl MO NO	No Overlap	h2b5	6.376	1229.85	331.673	3735.16	10.279
Ctrl MO NO	No Overlap	h2b5	6.376	922.042	150.147	3963.467	10.279
Ctrl MO NO	No Overlap	h2b5	6.376	709.15	150.157	4095	10.279
Ctrl MO NO	No Overlap	h2b5	6.376	285.469	39.933	2184.124	10.279
Ctrl MO NO	No Overlap	h3b1	11.131	1078.314	91.53	4095	18.011
Ctrl MO NO	No Overlap	h3b1	11.131	1117.972	66.088	4095	18.011
Ctrl MO NO	No Overlap	h3b1	11.131	909.155	73.256	4095	18.011
Ctrl MO NO	No Overlap	h3b1	11.131	540.292	38.587	3939.205	18.011
Ctrl MO NO	No Overlap	h3b1	11.131	381.488	31.74	4095	18.011
Ctrl MO NO	No Overlap	h3b1	11.131	237.501	26.304	2150.849	18.011
Ctrl MO NO	No Overlap
Ctrl MO NO	No Overlap	h3b2	9.672	1767.783	33.428	4095	15.639
Ctrl MO NO	No Overlap	h3b2	9.672	1162.006	76.398	3587.589	15.639
Ctrl MO NO	No Overlap	h3b2	9.672	622.741	112.118	1605.337	15.639
Ctrl MO NO	No Overlap	h3b2	9.672	312.211	53.929	1275.682	15.639
Ctrl MO NO	No Overlap
Ctrl MO NO	No Overlap	h3b3	13.184	1612.03	55.184	4095	21.347
Ctrl MO NO	No Overlap	h3b3	13.184	1165.7	102.479	3944.751	21.347
Ctrl MO NO	No Overlap	h3b3	13.184	755.116	110.724	3133.774	21.347
Ctrl MO NO	No Overlap	h3b3	13.184	424.982	68.418	2139.222	21.347
Ctrl MO NO	No Overlap	h3b3	13.184	216.733	20.416	1414.436	21.347
Ctrl MO NO	No Overlap
Ctrl MO NO	No Overlap	h3b4	6.754	1349.173	115.99	4095	10.894
Ctrl MO NO	No Overlap	h3b4	6.754	1388.77	83.682	4095	10.894
Ctrl MO NO	No Overlap	h3b4	6.754	1142.779	92.46	4095	10.894
Ctrl MO NO	No Overlap	h3b4	6.754	622.44	113.065	3223.553	10.894
Ctrl MO NO	No Overlap
Ctrl MO NO	No Overlap	h3b5	9.78	1983.757	86.09	4095	15.815
Ctrl MO NO	No Overlap	h3b5	9.78	1900.207	181.104	4095	15.815
Ctrl MO NO	No Overlap	h3b5	9.78	1654.66	320.337	4095	15.815
Ctrl MO NO	No Overlap	h3b5	9.78	1319.101	145.676	4095	15.815
Ctrl MO NO	No Overlap	h3b5	9.78	919.114	89.366	3875.552	15.815
Ctrl MO NO	No Overlap	h3b5	9.78	756.054	82.979	2955.049	15.815
Ctrl MO NO	No Overlap
Ctrl MO NO	No Overlap	h3b6	4.161	1795.817	221.784	4095	6.677
Ctrl MO NO	No Overlap	h3b6	4.161	1508.15	179.554	4033.198	6.677
Ctrl MO NO	No Overlap	h3b6	4.161	1070.949	335.042	4095	6.677
Ctrl MO NO	No Overlap	h3b6	4.161	734.418	207.337	4095	6.677
Ctrl MO NO	No Overlap	h3b6	4.161	406.431	61.92	1955.508	6.677
Ctrl MO NO	No Overlap	h4b1	11.725	1920.629	310.241	4095	18.977
Ctrl MO NO	No Overlap	h4b1	11.725	2042.565	239.514	4095	18.977
Ctrl MO NO	No Overlap	h4b1	11.725	1951.783	137.069	4095	18.977
Ctrl MO NO	No Overlap	h4b1	11.725	1595.648	105.32	4095	18.977
Ctrl MO NO	No Overlap	h4b1	11.725	1017.863	49.851	4095	18.977
Ctrl MO NO	No Overlap	h4b1	11.725	726.918	46.434	4083.232	18.977
Ctrl MO NO	No Overlap	h4b1	11.725	481.806	20.926	3551.904	18.977
Ctrl MO NO	No Overlap
Ctrl MO NO	No Overlap	h4b2	9.078	2227.197	247.468	4095	14.672
Ctrl MO NO	No Overlap	h4b2	9.078	2140.998	279.712	4095	14.672
Ctrl MO NO	No Overlap	h4b2	9.078	2000.572	255.334	4095	14.672
Ctrl MO NO	No Overlap	h4b2	9.078	1794.264	83.174	4095	14.672
Ctrl MO NO	No Overlap	h4b2	9.078	1485.441	67.148	4095	14.672
Ctrl MO NO	No Overlap	h4b2	9.078	1275.866	31.299	4095	14.672
Ctrl MO NO	No Overlap	h4b2	9.078	976.676	22.525	4095	14.672
Ctrl MO NO	No Overlap
Ctrl MO NO	No Overlap	h4b3	8.97	1559.163	190.346	4095	14.497
Ctrl MO NO	No Overlap	h4b3	8.97	1535.183	217.908	4095	14.497
Ctrl MO NO	No Overlap	h4b3	8.97	1554.519	248.913	4095	14.497
Ctrl MO NO	No Overlap	h4b3	8.97	1587.307	217.028	4095	14.497
Ctrl MO NO	No Overlap	h4b3	8.97	1469.499	231.28	4095	14.497
Ctrl MO NO	No Overlap	h4b3	8.97	1007.67	69.799	4095	14.497
Ctrl MO NO	No Overlap	h4b3	8.97	774.135	97.409	4095	14.497
Ctrl MO NO	No Overlap
Ctrl MO NO	No Overlap	h4b4	10.861	1746.404	82.673	4095	17.571
Ctrl MO NO	No Overlap	h4b4	10.861	1367.616	49.386	4095	17.571
Ctrl MO NO	No Overlap	h4b4	10.861	912.41	48.11	4095	17.571
Ctrl MO NO	No Overlap	h4b4	10.861	742.785	71.929	4095	17.571
Ctrl MO NO	No Overlap	h4b4	10.861	622.984	42.419	4095	17.571
Ctrl MO NO	No Overlap	h4b4	10.861	511.555	32.483	4078.477	17.571
Ctrl MO NO	No Overlap	h4b4	10.861	479.963	17.749	4083.446	17.571
Ctrl MO NO	No Overlap
Ctrl MO NO	No Overlap	h4b5	6.322	2405.37	342.185	4095	10.192
Ctrl MO NO	No Overlap	h4b5	6.322	2299.96	229.214	4095	10.192
Ctrl MO NO	No Overlap	h4b5	6.322	1633.157	173.876	4095	10.192
Ctrl MO NO	No Overlap	h4b5	6.322	811.906	41.668	4067.906	10.192
Ctrl MO NO	No Overlap	h4b5	6.322	511.414	55.745	2404.846	10.192
Ctrl MO NO	No Overlap	h4b5	6.322	336.225	42.181	1829.729	10.192
Ctrl MO NO	No Overlap
Ctrl MO NO	No Overlap	h4b6	6.484	2529.121	267.439	4095	10.455
Ctrl MO NO	No Overlap	h4b6	6.484	2968.513	332.956	4095	10.455
Ctrl MO NO	No Overlap	h4b6	6.484	2433.249	425.942	4095	10.455
Ctrl MO NO	No Overlap	h4b6	6.484	1801.176	376.991	4095	10.455
Ctrl MO NO	No Overlap	h4b6	6.484	1075.223	225.093	4011.244	10.455
Ctrl MO NO	No Overlap	h4b6	6.484	630.625	109.547	3036.54	10.455
Ctrl MO NO	No Overlap	h4b6	6.484	288.514	37.921	1126.3	10.455
Ctrl MO NO	No Overlap	h4b6	6.484	195.164	7.536	681.803	10.455
Ecad MO CO	Complete Overlap	h1b1	13.022	1591.528	176.25	4095	21.086
Ecad MO CO	Complete Overlap	h1b1	13.022	1779.459	278.083	4095	21.086
Ecad MO CO	Complete Overlap	h1b1	13.022	1531.05	149.87	4095	21.086
Ecad MO CO	Complete Overlap	h1b1	13.022	618.782	66.806	1877.036	21.086
Ecad MO CO	Complete Overlap	h1b1	13.022	381.11	30.436	1792.167	21.086
Ecad MO CO	Complete Overlap
Ecad MO CO	Complete Overlap
Ecad MO CO	Complete Overlap	h1b2	5.187	1994.56	168.676	4095	8.347
Ecad MO CO	Complete Overlap	h1b2	5.187	1962.732	74.962	4095	8.347
Ecad MO CO	Complete Overlap	h1b2	5.187	1503.821	76.869	4095	8.347
Ecad MO CO	Complete Overlap	h1b2	5.187	771.254	140.668	3868.306	8.347
Ecad MO CO	Complete Overlap	h1b2	5.187	335.572	66.536	1354.274	8.347
Ecad MO CO	Complete Overlap
Ecad MO CO	Complete Overlap	h1b3	9.888	1610.605	123.024	4095	15.99
Ecad MO CO	Complete Overlap	h1b3	9.888	1349.171	124.413	4095	15.99
Ecad MO CO	Complete Overlap	h1b3	9.888	927.66	84.222	3907.961	15.99
Ecad MO CO	Complete Overlap	h1b3	9.888	716.229	79.486	3922.19	15.99
Ecad MO CO	Complete Overlap
Ecad MO CO	Complete Overlap	h1b4	18.966	1393.17	93.985	4095	30.749
Ecad MO CO	Complete Overlap	h1b4	18.966	1124.808	140.281	4095	30.749
Ecad MO CO	Complete Overlap	h1b4	18.966	609.914	49.217	4094.699	30.749
Ecad MO CO	Complete Overlap	h1b4	18.966	397.695	19.075	3772.535	30.749
Ecad MO CO	Complete Overlap	h1b4	18.966	341.602	27.38	3471.296	30.749
Ecad MO CO	Complete Overlap
Ecad MO CO	Complete Overlap	h1b5	12.374	1779.76	227.161	4095	20.031
Ecad MO CO	Complete Overlap	h1b5	12.374	2124.206	216.495	4095	20.031
Ecad MO CO	Complete Overlap	h1b5	12.374	2200.6	171.03	4095	20.031
Ecad MO CO	Complete Overlap	h1b5	12.374	1674.649	163.533	4095	20.031
Ecad MO CO	Complete Overlap	h1b5	12.374	1007.856	127.022	4095	20.031
Ecad MO CO	Complete Overlap	h1b5	12.374	683.274	55.566	4084.858	20.031
Ecad MO CO	Complete Overlap
Ecad MO CO	Complete Overlap	h1b6	8.754	1912.726	120.939	4095	14.145
Ecad MO CO	Complete Overlap	h1b6	8.754	2124.109	139.551	4095	14.145
Ecad MO CO	Complete Overlap	h1b6	8.754	2001.558	209.98	4095	14.145
Ecad MO CO	Complete Overlap	h1b6	8.754	1690.537	212.816	4095	14.145
Ecad MO CO	Complete Overlap	h1b6	8.754	995.463	134.659	3977.456	14.145
Ecad MO CO	Complete Overlap
Ecad MO CO	Complete Overlap	h1b7	8.321	1542.282	223.687	4095	13.442
Ecad MO CO	Complete Overlap	h1b7	8.321	1543.578	132.285	4095	13.442
Ecad MO CO	Complete Overlap	h1b7	8.321	1011.749	111.065	3460.063	13.442
Ecad MO CO	Complete Overlap	h1b7	8.321	553.451	114.068	3134.036	13.442
Ecad MO CO	Complete Overlap	h1b7	8.321	355.39	99.081	1578.396	13.442
Ecad MO CO	Complete Overlap	h1b7	8.321	268.317	15.228	2356.074	13.442
Ecad MO CO	Complete Overlap
Ecad MO CO	Complete Overlap	h1b8	10.158	1909.068	119.549	4095	16.427
Ecad MO CO	Complete Overlap	h1b8	10.158	1775.988	148.6	4095	16.427
Ecad MO CO	Complete Overlap	h1b8	10.158	1534.592	104.101	4095	16.427
Ecad MO CO	Complete Overlap	h1b8	10.158	1174.806	59.017	4095	16.427
Ecad MO CO	Complete Overlap	h1b8	10.158	758.9	99.487	4095	16.427
Ecad MO CO	Complete Overlap	h1b8	10.158	626.484	52.07	4095	16.427
Ecad MO CO	Complete Overlap
Ecad MO CO	Complete Overlap	h1b9	10.321	1008.047	47.264	4095	16.693
Ecad MO CO	Complete Overlap	h1b9	10.321	1611.742	34.524	4095	16.693
Ecad MO CO	Complete Overlap	h1b9	10.321	1749.028	67.796	4095	16.693
Ecad MO CO	Complete Overlap	h1b9	10.321	1522.787	31.817	4095	16.693
Ecad MO CO	Complete Overlap	h1b9	10.321	882.185	51.749	4095	16.693
Ecad MO CO	Complete Overlap	h1b9	10.321	450.584	43.721	2583.266	16.693
Ecad MO CO	Complete Overlap	h1b9	10.321	360.742	34.294	1751.962	16.693
Ecad MO CO	Complete Overlap	h2b1	9.51	321.214	11.553	3605.232	15.375
Ecad MO CO	Complete Overlap	h2b1	9.51	320.757	14.498	1727.92	15.375
Ecad MO CO	Complete Overlap	h2b1	9.51	295.47	10.74	1824.625	15.375
Ecad MO CO	Complete Overlap	h2b1	9.51	231.682	8.204	1290.024	15.375
Ecad MO CO	Complete Overlap	h2b1	9.51	219.537	7.89	1201.495	15.375
Ecad MO CO	Complete Overlap	h2b1	9.51	223.331	4.484	1173.885	15.375
Ecad MO CO	Complete Overlap
Ecad MO CO	Complete Overlap	h2b2	10.699	434.555	13.102	4095	17.308
Ecad MO CO	Complete Overlap	h2b2	10.699	512.237	14.417	4095	17.308
Ecad MO CO	Complete Overlap	h2b2	10.699	517.047	12.957	4095	17.308
Ecad MO CO	Complete Overlap	h2b2	10.699	369.388	9.766	2790.861	17.308
Ecad MO CO	Complete Overlap	h2b2	10.699	327.445	21.169	2991.136	17.308
Ecad MO CO	Complete Overlap	h2b2	10.699	261.069	6.446	1802.311	17.308
Ecad MO CO	Complete Overlap	h2b2	10.699	206.461	8.261	1660.823	17.308
Ecad MO CO	Complete Overlap
Ecad MO CO	Complete Overlap	h2b3	10.429	232.629	12.385	1858.519	16.867
Ecad MO CO	Complete Overlap	h2b3	10.429	262.306	3.099	3976.396	16.867
Ecad MO CO	Complete Overlap	h2b3	10.429	206.339	6.191	1115.841	16.867
Ecad MO CO	Complete Overlap	h2b3	10.429	206.315	10.78	1832.748	16.867
Ecad MO CO	Complete Overlap	h2b3	10.429	231.828	5.341	3075.738	16.867
Ecad MO CO	Complete Overlap	h2b3	10.429	248.582	7.56	2399.431	16.867
Ecad MO CO	Complete Overlap	h2b3	10.429	227.803	4.44	1578.469	16.867
Ecad MO CO	Complete Overlap
Ecad MO CO	Complete Overlap	h2b4	10.158	436.577	7.746	4095	16.429
Ecad MO CO	Complete Overlap	h2b4	10.158	406.45	2.08	3519.194	16.429
Ecad MO CO	Complete Overlap	h2b4	10.158	371.604	9.843	3293.182	16.429
Ecad MO CO	Complete Overlap	h2b4	10.158	335.642	6.543	1991.111	16.429
Ecad MO CO	Complete Overlap	h2b4	10.158	253.22	6.732	2460.495	16.429
Ecad MO CO	Complete Overlap	h2b4	10.158	214.423	3.095	1131.656	16.429
Ecad MO CO	Complete Overlap	h2b4	10.158	198.622	0	1206.087	16.429
Ecad MO CO	Complete Overlap
Ecad MO CO	Complete Overlap	h2b5	16.048	762.106	54.942	4095	26.006
Ecad MO CO	Complete Overlap	h2b5	16.048	802.972	52.31	4095	26.006
Ecad MO CO	Complete Overlap	h2b5	16.048	737.299	52.938	4095	26.006
Ecad MO CO	Complete Overlap	h2b5	16.048	550.488	36.507	3209.802	26.006
Ecad MO CO	Complete Overlap	h2b5	16.048	443.687	11.304	4095	26.006
Ecad MO CO	Complete Overlap	h2b5	16.048	403.282	9.251	3875.926	26.006
Ecad MO CO	Complete Overlap	h2b5	16.048	346.777	2.151	3909.723	26.006
Ecad MO CO	Complete Overlap	h2b5	16.048	275.637	1.881	3248.291	26.006
Ecad MO CO	Complete Overlap	h2b5	16.048	210.762	0.004	3511.366	26.006
Ecad MO CO	Complete Overlap
Ecad MO CO	Complete Overlap	h2b6	14.643	764.178	32.958	4095	23.721
Ecad MO CO	Complete Overlap	h2b6	14.643	779.583	14.039	4095	23.721
Ecad MO CO	Complete Overlap	h2b6	14.643	720.493	25.768	4095	23.721
Ecad MO CO	Complete Overlap	h2b6	14.643	612.405	32.606	4095	23.721
Ecad MO CO	Complete Overlap	h2b6	14.643	513.932	32.394	3374.065	23.721
Ecad MO CO	Complete Overlap	h2b6	14.643	410.162	14.408	3344.186	23.721
Ecad MO CO	Complete Overlap
Ecad MO CO	Complete Overlap	h2b7	8.267	567.797	5.318	4095	13.35
Ecad MO CO	Complete Overlap	h2b7	8.267	555.097	24.23	4095	13.35
Ecad MO CO	Complete Overlap	h2b7	8.267	423.017	20.41	4069.519	13.35
Ecad MO CO	Complete Overlap	h2b7	8.267	336.566	29.988	2539.732	13.35
Ecad MO CO	Complete Overlap	h2b7	8.267	330.066	17.94	2683.461	13.35
Ecad MO CO	Complete Overlap	h2b7	8.267	367.717	28.821	4077.646	13.35
Ecad MO CO	Complete Overlap
Ecad MO CO	Complete Overlap	h2b8	12.158	382.771	19.288	4095	19.68
Ecad MO CO	Complete Overlap	h2b8	12.158	392.632	14.662	4095	19.68
Ecad MO CO	Complete Overlap	h2b8	12.158	433.972	7.291	4095	19.68
Ecad MO CO	Complete Overlap	h2b8	12.158	412.087	9.258	4095	19.68
Ecad MO CO	Complete Overlap	h2b8	12.158	397.153	8.711	4095	19.68
Ecad MO CO	Complete Overlap	h2b8	12.158	325.054	14.167	1962.696	19.68
Ecad MO CO	Complete Overlap	h2b8	12.158	277.245	11.102	1786.528	19.68
Ecad MO CO	Complete Overlap
Ecad MO CO	Complete Overlap	h2b9	7.457	591.943	62.559	4095	12.037
Ecad MO CO	Complete Overlap	h2b9	7.457	458.464	41.167	4074.844	12.037
Ecad MO CO	Complete Overlap	h2b9	7.457	363.219	21.718	2645.933	12.037
Ecad MO CO	Complete Overlap	h2b9	7.457	251.509	11.576	964.836	12.037
Ecad MO CO	Complete Overlap	h2b9	7.457	241.848	6.495	2123.131	12.037
Ecad MO CO	Complete Overlap	h2b9	7.457	319.342	15.941	4095	12.037
Ecad MO CO	Complete Overlap
Ecad MO CO	Complete Overlap	h2b10	8.591	179.34	7.431	1927.872	13.882
Ecad MO CO	Complete Overlap	h2b10	8.591	195.329	3.039	1180.116	13.882
Ecad MO CO	Complete Overlap	h2b10	8.591	227.872	5.391	2499.595	13.882
Ecad MO CO	Complete Overlap	h2b10	8.591	226.939	2.206	2467.765	13.882
Ecad MO CO	Complete Overlap	h2b10	8.591	216.962	1.177	2500.921	13.882
Ecad MO CO	Complete Overlap	h2b10	8.591	195.171	2.768	1135.984	13.882
Ecad MO CO	Complete Overlap
Ecad MO CO	Complete Overlap	h2b11	14.535	633.635	69.945	3802.188	23.545
Ecad MO CO	Complete Overlap	h2b11	14.535	463.946	44.85	4045.596	23.545
Ecad MO CO	Complete Overlap	h2b11	14.535	417.221	24.625	4090.958	23.545
Ecad MO CO	Complete Overlap	h2b11	14.535	350.27	5.681	2963.012	23.545
Ecad MO CO	Complete Overlap	h2b11	14.535	304.145	1.114	2211.475	23.545
Ecad MO CO	Complete Overlap	h2b11	14.535	220.294	0.748	2518.738	23.545
Ecad MO CO	Complete Overlap	h2b11	14.535	172.295	0.191	1923.828	23.545
Ecad MO CO	Complete Overlap
Ecad MO CO	Complete Overlap	h2b12	12.32	606.16	30.027	4060.148	19.944
Ecad MO CO	Complete Overlap	h2b12	12.32	573.409	46.981	3063.691	19.944
Ecad MO CO	Complete Overlap	h2b12	12.32	503.238	43.84	2406.896	19.944
Ecad MO CO	Complete Overlap	h2b12	12.32	472.681	33.194	3626.391	19.944
Ecad MO CO	Complete Overlap	h2b12	12.32	465.877	12.405	4095	19.944
Ecad MO CO	Complete Overlap	h2b12	12.32	447.149	11.455	4095	19.944
Ecad MO CO	Complete Overlap	h2b12	12.32	363.438	16.833	2010.227	19.944
Ecad MO CO	Complete Overlap	h2b12	12.32	285.703	22.775	1319.924	19.944
Ecad MO CO	Complete Overlap
Ecad MO CO	Complete Overlap	h2b13	7.727	469.147	20.031	4095	12.461
Ecad MO CO	Complete Overlap	h2b13	7.727	421.92	33.221	4091.457	12.461
Ecad MO CO	Complete Overlap	h2b13	7.727	383.867	41.568	3802.994	12.461
Ecad MO CO	Complete Overlap	h2b13	7.727	316.009	27.497	1831.063	12.461
Ecad MO CO	Complete Overlap	h2b13	7.727	248.558	6.949	1293.2	12.461
Ecad MO CO	Complete Overlap	h2b13	7.727	267.206	2.863	2330.02	12.461
Ecad MO CO	Complete Overlap
Ecad MO CO	Complete Overlap	h2b14	5.782	204.974	16.569	1190.907	9.313
Ecad MO CO	Complete Overlap	h2b14	5.782	183.341	14.876	986.873	9.313
Ecad MO CO	Complete Overlap	h2b14	5.782	195.901	15.826	1123.566	9.313
Ecad MO CO	Complete Overlap	h2b14	5.782	295.803	33.715	1197.491	9.313
Ecad MO CO	Complete Overlap	h2b14	5.782	409.393	25.771	3113.379	9.313
Ecad MO CO	Complete Overlap	h3b1	5.836	872.937	47.411	4095	9.401
Ecad MO CO	Complete Overlap	h3b1	5.836	981.777	17.645	4095	9.401
Ecad MO CO	Complete Overlap	h3b1	5.836	846.333	48.281	4095	9.401
Ecad MO CO	Complete Overlap	h3b1	5.836	562.223	48.856	3205.474	9.401
Ecad MO CO	Complete Overlap	h3b1	5.836	422.709	38.737	1387.953	9.401
Ecad MO CO	Complete Overlap
Ecad MO CO	Complete Overlap	h3b2	10.266	640.284	10.7	4095	16.599
Ecad MO CO	Complete Overlap	h3b2	10.266	755.707	1.405	4095	16.599
Ecad MO CO	Complete Overlap	h3b2	10.266	829.487	14.535	4095	16.599
Ecad MO CO	Complete Overlap	h3b2	10.266	690.83	17.511	3992.516	16.599
Ecad MO CO	Complete Overlap	h3b2	10.266	536.068	17.992	3558.111	16.599
Ecad MO CO	Complete Overlap
Ecad MO CO	Complete Overlap	h3b3	9.78	608.256	21.061	3985.558	15.815
Ecad MO CO	Complete Overlap	h3b3	9.78	618.569	47.907	4095	15.815
Ecad MO CO	Complete Overlap	h3b3	9.78	625.056	25.288	4095	15.815
Ecad MO CO	Complete Overlap	h3b3	9.78	598.646	42.498	4095	15.815
Ecad MO CO	Complete Overlap	h3b3	9.78	509.602	9.219	4095	15.815
Ecad MO CO	Complete Overlap	h3b3	9.78	434.665	18.331	2711.547	15.815
Ecad MO CO	Complete Overlap	h3b3	9.78	326.994	13.914	2737.261	15.815
Ecad MO CO	Complete Overlap
Ecad MO CO	Complete Overlap	h3b4	10.807	797.209	24	4095	17.484
Ecad MO CO	Complete Overlap	h3b4	10.807	916.741	4.457	4095	17.484
Ecad MO CO	Complete Overlap	h3b4	10.807	933.144	15.735	4095	17.484
Ecad MO CO	Complete Overlap	h3b4	10.807	798.441	16.905	4095	17.484
Ecad MO CO	Complete Overlap	h3b4	10.807	444.015	33.271	2172.826	17.484
Ecad MO CO	Complete Overlap	h3b4	10.807	240.155	21.426	1389.029	17.484
Ecad MO CO	Complete Overlap
Ecad MO CO	Complete Overlap	h3b5	10.645	1063.617	50.599	4095	17.22
Ecad MO CO	Complete Overlap	h3b5	10.645	1183.27	90.751	4095	17.22
Ecad MO CO	Complete Overlap	h3b5	10.645	1189.898	63.08	4095	17.22
Ecad MO CO	Complete Overlap	h3b5	10.645	1018.774	62.408	4095	17.22
Ecad MO CO	Complete Overlap	h3b5	10.645	739.49	54.41	4095	17.22
Ecad MO CO	Complete Overlap	h3b5	10.645	477.79	54.599	3947.957	17.22
Ecad MO CO	Complete Overlap
Ecad MO CO	Complete Overlap	h3b6	7.187	968.485	70.983	4095	11.597
Ecad MO CO	Complete Overlap	h3b6	7.187	866.363	31.925	4095	11.597
Ecad MO CO	Complete Overlap	h3b6	7.187	680.471	38.357	4095	11.597
Ecad MO CO	Complete Overlap	h3b6	7.187	465.941	27.485	3993.671	11.597
Ecad MO CO	Complete Overlap
Ecad MO CO	Complete Overlap	h3b7	9.294	516.899	81.974	4095	15.024
Ecad MO CO	Complete Overlap	h3b7	9.294	799.67	109.977	4095	15.024
Ecad MO CO	Complete Overlap	h3b7	9.294	1150.066	55.186	4095	15.024
Ecad MO CO	Complete Overlap	h3b7	9.294	1003.737	77.344	4095	15.024
Ecad MO CO	Complete Overlap	h3b7	9.294	885.118	125.944	4095	15.024
Ecad MO CO	Complete Overlap	h3b7	9.294	649.804	119.46	3208.387	15.024
Ecad MO CO	Complete Overlap	h3b7	9.294	431.473	28.4	3123.499	15.024
Ecad MO CO	Complete Overlap	h4b1	10.158	788.63	48.384	4030.865	16.428
Ecad MO CO	Complete Overlap	h4b1	10.158	776.228	50.579	4094.476	16.428
Ecad MO CO	Complete Overlap	h4b1	10.158	742.935	45.578	3938.915	16.428
Ecad MO CO	Complete Overlap	h4b1	10.158	774.671	60.627	3586.911	16.428
Ecad MO CO	Complete Overlap	h4b1	10.158	869.781	77.745	3299.061	16.428
Ecad MO CO	Complete Overlap	h4b1	10.158	912.574	79.119	2822.368	16.428
Ecad MO CO	Complete Overlap	h4b1	10.158	900.542	95.665	3804.556	16.428
Ecad MO CO	Complete Overlap	h4b1	10.158	809.709	76	3980.683	16.428
Ecad MO CO	Complete Overlap
Ecad MO CO	Complete Overlap	h4b2	7.835	979.89	108.909	4095	12.642
Ecad MO CO	Complete Overlap	h4b2	7.835	785.396	47.801	4095	12.642
Ecad MO CO	Complete Overlap	h4b2	7.835	685.162	33.679	4095	12.642
Ecad MO CO	Complete Overlap	h4b2	7.835	596.831	31.049	3901.963	12.642
Ecad MO CO	Complete Overlap	h4b2	7.835	502.474	6.554	4095	12.642
Ecad MO CO	Complete Overlap	h4b2	7.835	411.329	2.74	2458.769	12.642
Ecad MO CO	Complete Overlap	h4b2	7.835	329.867	9.581	1776.899	12.642
Ecad MO CO	Complete Overlap
Ecad MO CO	Complete Overlap	h4b3	6.322	584.259	91.824	3222.473	10.192
Ecad MO CO	Complete Overlap	h4b3	6.322	731.815	100.862	3998.697	10.192
Ecad MO CO	Complete Overlap	h4b3	6.322	788.673	87.804	3247.83	10.192
Ecad MO CO	Complete Overlap	h4b3	6.322	779.424	75.439	4095	10.192
Ecad MO CO	Complete Overlap	h4b3	6.322	738.914	61.345	4095	10.192
Ecad MO CO	Complete Overlap	h4b3	6.322	559.008	36.956	2005.557	10.192
Ecad MO CO	Complete Overlap
Ecad MO CO	Complete Overlap	h4b4	9.78	1000.478	88.793	4095	15.815
Ecad MO CO	Complete Overlap	h4b4	9.78	781.581	68.801	3307.596	15.815
Ecad MO CO	Complete Overlap	h4b4	9.78	568.55	25.765	4095	15.815
Ecad MO CO	Complete Overlap	h4b4	9.78	418.62	19.98	3995.124	15.815
Ecad MO CO	Complete Overlap	h4b4	9.78	228.065	8.454	1275.342	15.815
Ecad MO CO	Complete Overlap
Ecad MO CO	Complete Overlap	h4b5	7.349	595.285	84.657	2003.584	11.86
Ecad MO CO	Complete Overlap	h4b5	7.349	477.096	39.909	2401.107	11.86
Ecad MO CO	Complete Overlap	h4b5	7.349	405.53	31.65	2661.055	11.86
Ecad MO CO	Complete Overlap	h4b5	7.565	1066.003	142.278	4090.73	12.212
Ecad MO CO	Complete Overlap	h4b5	7.565	745.544	74.96	2876.674	12.212
Ecad MO CO	Complete Overlap	h4b5	7.565	468.191	13.706	4071.008	12.212
Ecad MO CO	Complete Overlap	h4b5	7.565	361.036	5.982	4094.908	12.212
Ecad MO CO	Complete Overlap	h4b5	7.565	251.984	2.377	3831.323	12.212
Ecad MO CO	Complete Overlap
Ecad MO CO	Complete Overlap	h4b6	9.672	1208.897	8.698	4095	15.639
Ecad MO CO	Complete Overlap	h4b6	9.672	1034.664	49.239	4095	15.639
Ecad MO CO	Complete Overlap	h4b6	9.672	516.22	26.035	3094.716	15.639
Ecad MO CO	Complete Overlap	h4b6	9.672	348.515	16.511	2795.325	15.639
Ecad MO CO	Complete Overlap	h4b6	9.672	223.797	3.591	1936.123	15.639
Ecad MO CO	Complete Overlap
Ecad MO CO	Complete Overlap	h4b7	7.133	1475.078	223.458	4095	11.509
Ecad MO CO	Complete Overlap	h4b7	7.133	1454.347	186.496	4095	11.509
Ecad MO CO	Complete Overlap	h4b7	7.133	1262.341	148.837	4095	11.509
Ecad MO CO	Complete Overlap	h4b7	7.133	941.599	53.072	4095	11.509
Ecad MO CO	Complete Overlap	h4b7	7.133	625.309	46.374	4095	11.509
Ecad MO CO	Complete Overlap	h4b7	7.133	311.489	9.113	1616.114	11.509
Ecad MO PO	Partial Overlap	h1b1	9.132	1034.884	80.164	4095	14.76
Ecad MO PO	Partial Overlap	h1b1	9.132	924.509	26.485	4029.799	14.76
Ecad MO PO	Partial Overlap	h1b1	9.132	715.156	65.211	4095	14.76
Ecad MO PO	Partial Overlap	h1b1	9.132	606.903	29.007	4095	14.76
Ecad MO PO	Partial Overlap
Ecad MO PO	Partial Overlap	h1b2	7.024	1333.004	124.658	4095	11.334
Ecad MO PO	Partial Overlap	h1b2	7.024	1576.014	112.786	4095	11.334
Ecad MO PO	Partial Overlap	h1b2	7.024	1667.634	165.282	4095	11.334
Ecad MO PO	Partial Overlap	h1b2	7.024	1542.869	203.764	4095	11.334
Ecad MO PO	Partial Overlap	h1b2	7.024	807.331	58.85	3729.492	11.334
Ecad MO PO	Partial Overlap	h1b2	7.024	496.018	61.992	3474.16	11.334
Ecad MO PO	Partial Overlap
Ecad MO PO	Partial Overlap	h1b3	5.349	1699.744	134.862	4095	8.61
Ecad MO PO	Partial Overlap	h1b3	5.349	987.457	109.117	3821.012	8.61
Ecad MO PO	Partial Overlap	h1b3	5.349	484.941	90.829	1361.959	8.61
Ecad MO PO	Partial Overlap	h1b3	5.349	210.077	52.27	468.546	8.61
Ecad MO PO	Partial Overlap	h1b3	5.349	85.691	8.394	389.119	8.61
Ecad MO PO	Partial Overlap	h2b1	4.377	579.829	39.144	4090.365	7.029
Ecad MO PO	Partial Overlap	h2b1	4.377	325.684	58.421	1429.128	7.029
Ecad MO PO	Partial Overlap	h2b1	4.377	202.649	18.289	1392.85	7.029
Ecad MO PO	Partial Overlap	h2b1	4.377	177.458	18.425	858.503	7.029
Ecad MO PO	Partial Overlap
Ecad MO PO	Partial Overlap	h2b2	10.05	560.812	21.606	2768.137	16.254
Ecad MO PO	Partial Overlap	h2b2	10.05	382.046	41.949	4095	16.254
Ecad MO PO	Partial Overlap	h2b2	10.05	351.932	28.445	4072.134	16.254
Ecad MO PO	Partial Overlap	h2b2	10.05	274.756	16.61	2418.101	16.254
Ecad MO PO	Partial Overlap	h2b2	10.05	181.272	12.757	2475.172	16.254
Ecad MO PO	Partial Overlap
Ecad MO PO	Partial Overlap	h2b3	12.104	850.296	33.138	4095	19.593
Ecad MO PO	Partial Overlap	h2b3	12.104	730.711	5.642	4095	19.593
Ecad MO PO	Partial Overlap	h2b3	12.104	493.676	34.945	3931.453	19.593
Ecad MO PO	Partial Overlap	h2b3	12.104	330.337	21.409	2528.445	19.593
Ecad MO PO	Partial Overlap	h2b3	12.104	316.956	31.83	2214.163	19.593
Ecad MO PO	Partial Overlap	h2b3	12.104	297.22	16.657	2426.681	19.593
Ecad MO PO	Partial Overlap	h2b3	12.104	302.709	16.532	3101.169	19.593
Ecad MO PO	Partial Overlap
Ecad MO PO	Partial Overlap	h2b4	7.943	455.964	28.599	4095	12.827
Ecad MO PO	Partial Overlap	h2b4	7.943	406.264	38.193	3976.175	12.827
Ecad MO PO	Partial Overlap	h2b4	7.943	322.416	31.031	1824.483	12.827
Ecad MO PO	Partial Overlap	h2b4	7.943	327.106	22.436	1761.306	12.827
Ecad MO PO	Partial Overlap
Ecad MO PO	Partial Overlap	h2b5	5.728	1135.652	37.664	4095	9.225
Ecad MO PO	Partial Overlap	h2b5	5.728	1322.276	31.918	4095	9.225
Ecad MO PO	Partial Overlap	h2b5	5.728	1134.082	76.602	4095	9.225
Ecad MO PO	Partial Overlap	h2b5	5.728	914.609	73.18	4095	9.225
Ecad MO PO	Partial Overlap	h2b5	5.728	487.114	33.044	2431.416	9.225
Ecad MO PO	Partial Overlap	h2b5	5.728	327.968	23.495	1479.447	9.225
Ecad MO PO	Partial Overlap
Ecad MO PO	Partial Overlap	h2b6	7.565	948.503	57.074	4095	12.212
Ecad MO PO	Partial Overlap	h2b6	7.565	1003.815	70.563	4095	12.212
Ecad MO PO	Partial Overlap	h2b6	7.565	913.368	65.967	4095	12.212
Ecad MO PO	Partial Overlap	h2b6	7.565	739.601	17.701	4095	12.212
Ecad MO PO	Partial Overlap	h2b6	7.565	645.643	31.193	4079.635	12.212
Ecad MO PO	Partial Overlap	h2b6	7.565	518.094	15.336	3724.818	12.212
Ecad MO PO	Partial Overlap	h3b1	9.888	802.036	64.689	4095	15.99
Ecad MO PO	Partial Overlap	h3b1	9.888	692.253	47.451	4095	15.99
Ecad MO PO	Partial Overlap	h3b1	9.888	519.788	47.169	4029.466	15.99
Ecad MO PO	Partial Overlap	h3b1	11.779	721.178	6.089	4095	19.065
Ecad MO PO	Partial Overlap	h3b1	11.779	552.821	39.504	4095	19.065
Ecad MO PO	Partial Overlap	h3b1	11.779	393.843	33.909	4095	19.065
Ecad MO PO	Partial Overlap	h3b1	11.779	240.319	17.434	1767.126	19.065
Ecad MO PO	Partial Overlap	h4b1	9.24	1255.004	102.5	4095	14.935
Ecad MO PO	Partial Overlap	h4b1	9.24	749.39	82.758	4095	14.935
Ecad MO PO	Partial Overlap	h4b1	9.24	529.913	71.652	3750.363	14.935
Ecad MO PO	Partial Overlap	h4b1	9.24	362.884	59.61	4067.709	14.935
Ecad MO PO	Partial Overlap	h4b1	9.24	263.819	23.402	2833.88	14.935
Ecad MO PO	Partial Overlap
Ecad MO PO	Partial Overlap	h4b2	8.321	892.285	62.958	3098.84	13.442
Ecad MO PO	Partial Overlap	h4b2	8.321	776.723	39.941	3253.678	13.442
Ecad MO PO	Partial Overlap	h4b2	8.321	600.258	36.902	3706.749	13.442
Ecad MO PO	Partial Overlap	h4b2	8.321	479.862	62.205	3084.551	13.442
Ecad MO PO	Partial Overlap	h4b2	8.321	420.025	36.519	2662.289	13.442
Ecad MO NO	No Overlap	h1b1	5.998	1986.865	69.367	4095	9.664
Ecad MO NO	No Overlap	h1b1	5.998	1546.491	106.705	4095	9.664
Ecad MO NO	No Overlap	h1b1	5.998	782.905	138.193	3795.247	9.664
Ecad MO NO	No Overlap	h1b1	5.998	337.67	80.881	1362.249	9.664
Ecad MO NO	No Overlap	h1b1	5.998	231.182	30.316	1592.103	9.664
Ecad MO NO	No Overlap
Ecad MO NO	No Overlap	h1b2	5.025	1149.119	145.988	4095	8.083
Ecad MO NO	No Overlap	h1b2	5.025	846.45	177.886	3971.336	8.083
Ecad MO NO	No Overlap	h1b2	5.025	434.857	81.346	1831.512	8.083
Ecad MO NO	No Overlap	h1b2	5.025	195.9	22.306	622.418	8.083
Ecad MO NO	No Overlap	h1b2	5.025	117.401	4.538	366.452	8.083
Ecad MO NO	No Overlap
Ecad MO NO	No Overlap	h1b3	8.591	1978.026	326.392	4095	13.882
Ecad MO NO	No Overlap	h1b3	8.591	1452.064	277.127	4095	13.882
Ecad MO NO	No Overlap	h1b3	8.591	722.754	111.719	2550.289	13.882
Ecad MO NO	No Overlap	h1b3	8.591	295.336	49.037	1218.572	13.882
Ecad MO NO	No Overlap	h1b3	8.591	208.225	7.776	1825.83	13.882
Ecad MO NO	No Overlap	h1b3	8.591	155.771	11.728	1929.095	13.882
Ecad MO NO	No Overlap
Ecad MO NO	No Overlap	h1b4	7.133	2237.296	307.556	4095	11.507
Ecad MO NO	No Overlap	h1b4	7.133	2306.224	379.69	4095	11.507
Ecad MO NO	No Overlap	h1b4	7.133	1789.332	325.992	4095	11.507
Ecad MO NO	No Overlap	h1b4	7.133	989.291	185.073	3834.022	11.507
Ecad MO NO	No Overlap	h1b4	7.133	464.825	68.105	1439.852	11.507
Ecad MO NO	No Overlap	h1b4	7.133	259.078	34.3	1173.91	11.507
Ecad MO NO	No Overlap
Ecad MO NO	No Overlap	h1b5	9.942	1592.001	63.408	4095	16.078
Ecad MO NO	No Overlap	h1b5	9.942	1254.981	73.861	4095	16.078
Ecad MO NO	No Overlap	h1b5	9.942	612.372	98.094	2051.31	16.078
Ecad MO NO	No Overlap	h1b5	9.942	286.775	38.307	963.43	16.078
Ecad MO NO	No Overlap	h1b5	9.942	174.427	15.715	1085.959	16.078
Ecad MO NO	No Overlap	h1b5	9.942	113.829	7.963	524.232	16.078
Ecad MO NO	No Overlap	h1b5	9.942	83.853	4.665	637.899	16.078
Ecad MO NO	No Overlap
Ecad MO NO	No Overlap	h1b6	6.43	966.452	105.739	4095	10.367
Ecad MO NO	No Overlap	h1b6	6.43	527.636	10.829	3463.866	10.367
Ecad MO NO	No Overlap	h1b6	6.43	279.384	23.331	1962.419	10.367
Ecad MO NO	No Overlap	h1b6	6.43	153.252	8.036	1238.21	10.367
Ecad MO NO	No Overlap
Ecad MO NO	No Overlap	h1b7	8.267	1650.018	162.44	4095	13.352
Ecad MO NO	No Overlap	h1b7	8.267	903.99	101.023	4095	13.352
Ecad MO NO	No Overlap	h1b7	8.267	638.718	64.375	4095	13.352
Ecad MO NO	No Overlap	h1b7	8.267	393.683	39.132	3821.594	13.352
Ecad MO NO	No Overlap	h1b7	8.267	213.246	20.505	831.202	13.352
Ecad MO NO	No Overlap	h1b7	8.267	174.261	4.17	1058.86	13.352
Ecad MO NO	No Overlap	h3b1	9.51	1842.543	214.879	4095	15.375
Ecad MO NO	No Overlap	h3b1	9.51	1942.069	247.944	4095	15.375
Ecad MO NO	No Overlap	h3b1	9.51	1753.34	261.349	4095	15.375
Ecad MO NO	No Overlap	h3b1	9.51	1374.552	141.363	4095	15.375
Ecad MO NO	No Overlap	h3b1	9.51	386.237	51.204	2726.079	15.375
Ecad MO NO	No Overlap
Ecad MO NO	No Overlap	h3b2	9.24	1032.295	139.5	4095	14.936
Ecad MO NO	No Overlap	h3b2	9.24	1041.247	80.648	4095	14.936
Ecad MO NO	No Overlap	h3b2	9.24	883.636	105.423	4095	14.936
Ecad MO NO	No Overlap	h3b2	9.24	634.024	71.248	3042.156	14.936
Ecad MO NO	No Overlap	h3b2	9.24	505.825	23.033	3787.96	14.936
Ecad MO NO	No Overlap	h3b2	9.24	388.201	11.309	3574.981	14.936
Ecad MO NO	No Overlap
Ecad MO NO	No Overlap	h3b3	10.429	790.55	85.869	4095	16.869
Ecad MO NO	No Overlap	h3b3	10.429	693.55	97.438	4095	16.869
Ecad MO NO	No Overlap	h3b3	10.429	483.607	28.219	4095	16.869
Ecad MO NO	No Overlap	h3b3	10.429	406.959	30.181	4095	16.869
Ecad MO NO	No Overlap	h3b3	10.429	344.746	18.627	4095	16.869
Ecad MO NO	No Overlap	h3b3	10.429	239.302	8.223	4095	16.869
Ecad MO NO	No Overlap	h4b1	8.429	1225.768	18.712	4095	13.618
Ecad MO NO	No Overlap	h4b1	8.429	1019.147	82.579	4095	13.618
Ecad MO NO	No Overlap	h4b1	8.429	603.035	86.581	4077.859	13.618
Ecad MO NO	No Overlap	h4b1	8.429	249.986	18.568	2099.409	13.618
Ecad MO NO	No Overlap	h4b1	8.429	183.548	14.586	986.891	13.618
Ecad MO NO	No Overlap
Ecad MO NO	No Overlap	h4b2	8.375	1255.288	118.15	4095	13.53
Ecad MO NO	No Overlap	h4b2	8.375	1098.175	129.062	4095	13.53
Ecad MO NO	No Overlap	h4b2	8.375	864.822	68.3	4095	13.53
Ecad MO NO	No Overlap	h4b2	8.375	574.97	45.333	4095	13.53
Ecad MO NO	No Overlap	h4b2	8.375	351.295	19.39	4095	13.53
Ecad MO NO	No Overlap
Ecad MO NO	No Overlap	h4b3	8.159	1144.627	51.499	4091.032	13.179
Ecad MO NO	No Overlap	h4b3	8.159	1177.977	71.737	4095	13.179
Ecad MO NO	No Overlap	h4b3	8.159	1085.48	87.474	4095	13.179
Ecad MO NO	No Overlap	h4b3	8.159	646.552	28.811	2670.763	13.179
Ecad MO NO	No Overlap	h4b3	8.159	440.776	14.055	1648.973	13.179
Ecad MO NO	No Overlap	h4b3	8.159	276.078	10.285	1319.45	13.179
Ecad MO NO	No Overlap	h4b3	8.159	166.019	0.533	1050.836	13.179
Ecad MO NO	No Overlap	h4b3	8.159	82.586	0.099	1370.904	13.179
