# Supplementary material for: Stepwise polarisation of developing bilayered epidermis is mediated by aPKC and E-cadherin in zebrafish
Source: eLife. 2020 Jan 22;9:e49064. doi: 10.7554/eLife.49064 (PMC6975926; doi:10.7554/eLife.49064)
Supplement: Figure 4—source data 3. [file elife-49064-fig4-data3.csv]

Genotype	Boundary	Cell name	Area	Mean	Min	Max	Length
Ctrl MO CO	Complete Overlap	h1b1	10.321	621.255	57.533	1921.878	16.693
Ctrl MO CO	Complete Overlap	h1b1	10.321	950.597	92.922	4095	16.693
Ctrl MO CO	Complete Overlap	h1b1	10.321	1049.988	170.834	4095	16.693
Ctrl MO CO	Complete Overlap	h1b1	10.321	1299.74	170.023	4095	16.693
Ctrl MO CO	Complete Overlap	h1b1	10.321	1548.082	193.401	4095	16.693
Ctrl MO CO	Complete Overlap	h1b1	10.483	1737.547	232.977	4095	16.956
Ctrl MO CO	Complete Overlap	h1b1	10.483	1445.549	210.651	4095	16.956
Ctrl MO CO	Complete Overlap	h1b1	10.483	1173.869	199.085	4057.368	16.956
Ctrl MO CO	Complete Overlap
Ctrl MO CO	Complete Overlap	h1b2	8.591	789.587	38.88	3555.161	13.882
Ctrl MO CO	Complete Overlap	h1b2	8.591	931.801	77.397	3168.196	13.882
Ctrl MO CO	Complete Overlap	h1b2	8.591	931.801	77.397	3168.196	13.882
Ctrl MO CO	Complete Overlap	h1b2	8.591	1078.037	172.715	4094.619	13.882
Ctrl MO CO	Complete Overlap	h1b2	8.591	1426.582	187.86	4095	13.882
Ctrl MO CO	Complete Overlap	h1b2	8.591	1887.197	310.479	4095	13.882
Ctrl MO CO	Complete Overlap	h1b2	8.591	2065.799	91.282	4095	13.882
Ctrl MO CO	Complete Overlap	h1b2	8.591	1342.676	128.855	4095	13.882
Ctrl MO CO	Complete Overlap
Ctrl MO CO	Complete Overlap	h1b3	8.429	259.306	0.021	1183.14	13.602
Ctrl MO CO	Complete Overlap	h1b3	8.429	576.032	0.555	3969.629	13.602
Ctrl MO CO	Complete Overlap	h1b3	8.429	601.238	1.087	4095	13.602
Ctrl MO CO	Complete Overlap	h1b3	8.429	637.791	2.953	4095	13.602
Ctrl MO CO	Complete Overlap	h1b3	8.429	754.49	14.059	4095	13.602
Ctrl MO CO	Complete Overlap	h1b3	8.429	885.302	31.71	4095	13.602
Ctrl MO CO	Complete Overlap	h1b3	8.429	815.814	56.653	4095	13.602
Ctrl MO CO	Complete Overlap
Ctrl MO CO	Complete Overlap	h1b4	7.943	625.519	3.918	3029.913	12.827
Ctrl MO CO	Complete Overlap	h1b4	7.943	767.457	12.43	4095	12.827
Ctrl MO CO	Complete Overlap	h1b4	7.943	737.352	17.454	4095	12.827
Ctrl MO CO	Complete Overlap	h1b4	7.943	791.301	21.913	4095	12.827
Ctrl MO CO	Complete Overlap	h1b4	7.943	890.046	44.45	4095	12.827
Ctrl MO CO	Complete Overlap	h1b4	8.159	2201.624	202.733	4095	13.179
Ctrl MO CO	Complete Overlap	h1b4	8.159	1641.328	282.063	4094.517	13.179
Ctrl MO CO	Complete Overlap	h1b4	8.159	1363.427	168.878	3957.89	13.179
Ctrl MO CO	Complete Overlap	h2b1	11.239	545.021	15.464	2291.472	18.187
Ctrl MO CO	Complete Overlap	h2b1	11.239	966.231	52.473	3462.901	18.187
Ctrl MO CO	Complete Overlap	h2b1	11.239	1206.729	121.506	4095	18.187
Ctrl MO CO	Complete Overlap	h2b1	11.239	1584.134	110.814	4095	18.187
Ctrl MO CO	Complete Overlap	h2b1	11.239	1727.482	216.045	4095	18.187
Ctrl MO CO	Complete Overlap	h2b1	11.239	2191.164	171.882	4095	18.187
Ctrl MO CO	Complete Overlap	h2b1	11.239	2484.832	249.893	4095	18.187
Ctrl MO CO	Complete Overlap	h2b1	11.239	1885.985	200.32	4095	18.187
Ctrl MO CO	Complete Overlap
Ctrl MO CO	Complete Overlap	h2b2	7.997	481.605	7.545	3112.257	12.915
Ctrl MO CO	Complete Overlap	h2b2	7.997	644.743	5.247	4095	12.915
Ctrl MO CO	Complete Overlap	h2b2	7.997	673.257	54.881	4095	12.915
Ctrl MO CO	Complete Overlap	h2b2	7.997	719.489	88.012	4095	12.915
Ctrl MO CO	Complete Overlap	h2b2	7.997	849.502	115.45	4095	12.915
Ctrl MO CO	Complete Overlap	h2b2	7.997	1045.666	161.517	4095	12.915
Ctrl MO CO	Complete Overlap
Ctrl MO CO	Complete Overlap	h2b3	5.295	573.959	82.757	1198.317	8.522
Ctrl MO CO	Complete Overlap	h2b3	5.295	1012.539	91.858	2597.169	8.522
Ctrl MO CO	Complete Overlap	h2b3	5.295	1230.525	252.916	4095	8.522
Ctrl MO CO	Complete Overlap	h2b3	5.295	1447.755	268.728	4095	8.522
Ctrl MO CO	Complete Overlap	h2b3	5.295	1560.87	392.957	4095	8.522
Ctrl MO CO	Complete Overlap	h2b3	5.295	1848.912	401.42	4095	8.522
Ctrl MO CO	Complete Overlap	h2b3	5.295	2119.478	520.138	4095	8.522
Ctrl MO CO	Complete Overlap	h2b3	5.295	1956.192	357.99	4095	8.522
Ctrl MO CO	Complete Overlap
Ctrl MO CO	Complete Overlap	h2b4	10.861	1058.442	22.637	4095	17.572
Ctrl MO CO	Complete Overlap	h2b4	10.861	1138.822	47.85	4095	17.572
Ctrl MO CO	Complete Overlap	h2b4	10.861	1133.766	49.736	4095	17.572
Ctrl MO CO	Complete Overlap	h2b4	10.861	1166.489	67.044	4095	17.572
Ctrl MO CO	Complete Overlap	h2b4	10.861	1163.688	70.538	4095	17.572
Ctrl MO CO	Complete Overlap	h2b4	10.861	1193.776	143.404	4095	17.572
Ctrl MO CO	Complete Overlap
Ctrl MO CO	Complete Overlap	h2b5	8.97	709.394	49.868	2526.678	14.496
Ctrl MO CO	Complete Overlap	h2b5	8.97	940.203	64.836	3868.628	14.496
Ctrl MO CO	Complete Overlap	h2b5	8.97	1036.538	48.622	4087.204	14.496
Ctrl MO CO	Complete Overlap	h2b5	8.97	1102.674	101.585	4052.675	14.496
Ctrl MO CO	Complete Overlap	h2b5	8.97	1250.772	102.806	4030.612	14.496
Ctrl MO CO	Complete Overlap	h2b5	8.97	1431.615	233.299	4066.133	14.496
Ctrl MO CO	Complete Overlap	h2b5	8.97	1436.064	294.551	4094.659	14.496
Ctrl MO CO	Complete Overlap	h3b1	8.754	346.896	3.771	1728.348	14.145
Ctrl MO CO	Complete Overlap	h3b1	8.754	511.787	36.724	2369.862	14.145
Ctrl MO CO	Complete Overlap	h3b1	8.754	728.427	47.225	3596.798	14.145
Ctrl MO CO	Complete Overlap	h3b1	8.754	920.702	89.431	4095	14.145
Ctrl MO CO	Complete Overlap	h3b1	8.754	1515.936	188.334	4095	14.145
Ctrl MO CO	Complete Overlap	h3b1	8.754	1995.109	215.509	4095	14.145
Ctrl MO CO	Complete Overlap	h3b1	8.754	2170.004	229.859	4095	14.145
Ctrl MO CO	Complete Overlap	h3b1	8.754	1960.55	256.298	4094.953	14.145
Ctrl MO CO	Complete Overlap	h3b1	8.754	1140.984	149.08	4095	14.145
Ctrl MO CO	Complete Overlap
Ctrl MO CO	Complete Overlap	h3b2	3.944	644.34	32.759	2467.971	6.326
Ctrl MO CO	Complete Overlap	h3b2	3.944	857.848	85.827	3000.126	6.326
Ctrl MO CO	Complete Overlap	h3b2	3.944	1089.474	219.074	3559.346	6.326
Ctrl MO CO	Complete Overlap	h3b2	3.944	1895.439	312.628	4095	6.326
Ctrl MO CO	Complete Overlap	h3b2	3.944	2457.209	571.96	4095	6.326
Ctrl MO CO	Complete Overlap	h3b2	3.944	2500.72	763.567	4095	6.326
Ctrl MO CO	Complete Overlap	h3b2	3.944	1809.046	379.112	3573.407	6.326
Ctrl MO CO	Complete Overlap	h3b2	3.944	724.798	235.744	3090.126	6.326
Ctrl MO CO	Complete Overlap
Ctrl MO CO	Complete Overlap	h3b3	12.374	800.565	43.891	3589.233	20.032
Ctrl MO CO	Complete Overlap	h3b3	12.374	919.495	62.289	4095	20.032
Ctrl MO CO	Complete Overlap	h3b3	12.374	1195.357	54.125	4095	20.032
Ctrl MO CO	Complete Overlap	h3b3	12.374	1410.022	63.03	4095	20.032
Ctrl MO CO	Complete Overlap	h3b3	12.374	1525.594	71.461	4095	20.032
Ctrl MO CO	Complete Overlap	h3b3	12.374	1506.307	72.186	4095	20.032
Ctrl MO CO	Complete Overlap	h3b3	12.374	1087.201	94.331	4095	20.032
Ctrl MO CO	Complete Overlap
Ctrl MO CO	Complete Overlap	h3b4	14.913	724.86	28.3	3858.222	24.161
Ctrl MO CO	Complete Overlap	h3b4	14.913	690.575	30.559	4095	24.161
Ctrl MO CO	Complete Overlap	h3b4	14.913	670.242	40.282	4095	24.161
Ctrl MO CO	Complete Overlap	h3b4	14.913	987.832	64.282	4095	24.161
Ctrl MO CO	Complete Overlap	h3b4	14.805	1646.153	78.495	4095	23.985
Ctrl MO CO	Complete Overlap	h3b4	14.805	1715.28	96.772	4095	23.985
Ctrl MO CO	Complete Overlap	h3b4	14.805	1684.973	133.703	4095	23.985
Ctrl MO CO	Complete Overlap	h3b4	14.805	1342.901	177.112	4095	23.985
Ctrl MO CO	Complete Overlap
Ctrl MO CO	Complete Overlap	h3b5	7.619	1096.389	125.15	4095	12.3
Ctrl MO CO	Complete Overlap	h3b5	7.619	1415.187	160.045	4095	12.3
Ctrl MO CO	Complete Overlap	h3b5	7.619	1777.799	155.045	4095	12.3
Ctrl MO CO	Complete Overlap	h3b5	7.619	2044.588	206.64	4095	12.3
Ctrl MO CO	Complete Overlap	h3b5	7.619	2086.092	229.817	4095	12.3
Ctrl MO CO	Complete Overlap	h3b5	7.619	1355.753	211.641	4095	12.3
Ctrl MO CO	Complete Overlap
Ctrl MO CO	Complete Overlap	h3b6	7.187	877.547	53.323	4087.23	11.597
Ctrl MO CO	Complete Overlap	h3b6	7.187	965.42	140.547	4095	11.597
Ctrl MO CO	Complete Overlap	h3b6	7.187	1200.313	176.547	4095	11.597
Ctrl MO CO	Complete Overlap	h3b6	7.187	1500.543	251.06	4095	11.597
Ctrl MO CO	Complete Overlap	h3b6	7.187	1920.251	228.758	4095	11.597
Ctrl MO CO	Complete Overlap	h3b6	7.187	1764.971	176.556	4095	11.597
Ctrl MO CO	Complete Overlap
Ctrl MO CO	Complete Overlap	h3b7	10.645	831.163	174.092	4018.983	17.22
Ctrl MO CO	Complete Overlap	h3b7	10.645	1009.959	176.357	4095	17.22
Ctrl MO CO	Complete Overlap	h3b7	10.645	974.722	106.775	4095	17.22
Ctrl MO CO	Complete Overlap	h3b7	10.645	1049.278	157.788	4095	17.22
Ctrl MO CO	Complete Overlap	h3b7	10.645	1102.843	138.074	4095	17.22
Ctrl MO CO	Complete Overlap	h3b7	10.645	1348.695	188.859	4095	17.22
Ctrl MO CO	Complete Overlap	h3b7	10.645	1647.363	206.14	4095	17.22
Ctrl MO CO	Complete Overlap	h4b1	12.32	721.537	58.019	3814.241	19.944
Ctrl MO CO	Complete Overlap	h4b1	12.32	1522.548	110.617	4095	19.944
Ctrl MO CO	Complete Overlap	h4b1	12.32	1601.647	111.861	4095	19.944
Ctrl MO CO	Complete Overlap	h4b1	12.32	1553.548	150.446	4095	19.944
Ctrl MO CO	Complete Overlap	h4b1	12.32	1861.297	206.693	4095	19.944
Ctrl MO CO	Complete Overlap	h4b1	12.266	2459.933	129.807	4095	19.856
Ctrl MO CO	Complete Overlap	h4b1	12.266	2174.703	187.131	4095	19.856
Ctrl MO CO	Complete Overlap	h4b1	12.266	1672.223	102.143	4095	19.856
Ctrl MO CO	Complete Overlap	h4b1	12.266	1113.869	45.058	4095	19.856
Ctrl MO CO	Complete Overlap
Ctrl MO CO	Complete Overlap	h4b2	3.728	1740.627	237.117	4095	5.974
Ctrl MO CO	Complete Overlap	h4b2	3.728	2025.332	231.435	4095	5.974
Ctrl MO CO	Complete Overlap	h4b2	3.728	2165.433	202.822	4095	5.974
Ctrl MO CO	Complete Overlap	h4b2	3.728	1933.301	330.153	4095	5.974
Ctrl MO CO	Complete Overlap	h4b2	3.728	1701.488	474.687	4095	5.974
Ctrl MO CO	Complete Overlap	h4b2	3.728	1679.178	382.945	4047.863	5.974
Ctrl MO CO	Complete Overlap	h4b2	3.728	1442.778	247.793	4095	5.974
Ctrl MO CO	Complete Overlap
Ctrl MO CO	Complete Overlap	h4b3	9.618	689.887	16.307	2788.641	15.546
Ctrl MO CO	Complete Overlap	h4b3	9.618	1260.559	35.996	4078.362	15.546
Ctrl MO CO	Complete Overlap	h4b3	9.618	1519.889	42.372	4095	15.546
Ctrl MO CO	Complete Overlap	h4b3	9.618	1717.602	26.098	4095	15.546
Ctrl MO CO	Complete Overlap	h4b3	9.618	1521.055	64.154	4095	15.546
Ctrl MO CO	Complete Overlap	h4b3	9.51	2582.921	350.235	4095	15.375
Ctrl MO CO	Complete Overlap	h4b3	9.51	2314.726	350.952	4095	15.375
Ctrl MO CO	Complete Overlap	h4b3	9.51	1503.147	209.11	4095	15.375
Ctrl MO CO	Complete Overlap
Ctrl MO CO	Complete Overlap	h4b4	9.618	1337.697	93.145	3876.041	15.551
Ctrl MO CO	Complete Overlap	h4b4	9.618	1930.452	79.289	4095	15.551
Ctrl MO CO	Complete Overlap	h4b4	9.618	2026.19	140.631	4095	15.551
Ctrl MO CO	Complete Overlap	h4b4	9.618	2153.493	197.484	4095	15.551
Ctrl MO CO	Complete Overlap	h4b4	9.618	2588.325	203.037	4095	15.551
Ctrl MO CO	Complete Overlap	h4b4	9.618	1974.894	326.923	4095	15.551
Ctrl MO CO	Complete Overlap	h4b4	8.645	2908.322	561.516	4095	13.97
Ctrl MO CO	Complete Overlap	h4b4	8.645	2480.853	728.702	4095	13.97
Ctrl MO CO	Complete Overlap
Ctrl MO CO	Complete Overlap	h4b5	4.377	1519.828	155.404	4095	7.029
Ctrl MO CO	Complete Overlap	h4b5	4.377	2059.873	199.364	4095	7.029
Ctrl MO CO	Complete Overlap	h4b5	4.377	1972.802	208.182	4095	7.029
Ctrl MO CO	Complete Overlap	h4b5	4.377	1748.166	290.065	4095	7.029
Ctrl MO CO	Complete Overlap	h4b5	4.377	1970.765	230.441	4095	7.029
Ctrl MO CO	Complete Overlap	h4b5	4.377	2060.009	207.515	4095	7.029
Ctrl MO CO	Complete Overlap	h4b5	4.377	1679.829	214.402	4095	7.029
Ctrl MO CO	Complete Overlap	h4b5	4.377	1446.787	230.596	4095	7.029
Ctrl MO CO	Complete Overlap	h6b1	10.807	717.954	42.099	2248.742	17.484
Ctrl MO CO	Complete Overlap	h6b1	10.807	856.213	46.228	2672.771	17.484
Ctrl MO CO	Complete Overlap	h6b1	10.807	857.894	91.992	4081.95	17.484
Ctrl MO CO	Complete Overlap	h6b1	10.807	889.558	60.807	4095	17.484
Ctrl MO CO	Complete Overlap	h6b1	10.807	1082.496	66.622	4095	17.484
Ctrl MO CO	Complete Overlap	h6b1	10.807	1194.652	112.356	4095	17.484
Ctrl MO CO	Complete Overlap	h6b1	10.807	1129.232	120.251	3986.331	17.484
Ctrl MO CO	Complete Overlap	h6b1	10.807	1126.544	120.344	3968.877	17.484
Ctrl MO CO	Complete Overlap	h6b1	10.807	1179.154	155.63	4095	17.484
Ctrl MO CO	Complete Overlap	h6b1	10.807	1241.588	189.909	4084.718	17.484
Ctrl MO CO	Complete Overlap
Ctrl MO CO	Complete Overlap	h6b2	14.751	975.674	15.849	3572.706	23.898
Ctrl MO CO	Complete Overlap	h6b2	14.751	1170.134	16.888	4088.195	23.898
Ctrl MO CO	Complete Overlap	h6b2	14.751	1007.764	47.951	4095	23.898
Ctrl MO CO	Complete Overlap	h6b2	14.751	755.033	71.469	4095	23.898
Ctrl MO CO	Complete Overlap	h6b2	14.751	560.104	71.959	4095	23.898
Ctrl MO CO	Complete Overlap	h6b2	14.751	473.683	49.025	4076.911	23.898
Ctrl MO CO	Complete Overlap	h6b2	14.751	510.298	23.668	3854.905	23.898
Ctrl MO CO	Complete Overlap	h6b2	14.751	626.231	52.084	3744.182	23.898
Ctrl MO CO	Complete Overlap	h6b2	14.751	797.315	55.601	4071.085	23.898
Ctrl MO CO	Complete Overlap	h6b2	14.751	790.696	74.013	3994.531	23.898
Ctrl MO CO	Complete Overlap
Ctrl MO CO	Complete Overlap	h6b3	10.104	1149.957	85.353	3676.849	16.342
Ctrl MO CO	Complete Overlap	h6b3	10.104	1236.47	155.445	4095	16.342
Ctrl MO CO	Complete Overlap	h6b3	10.104	1090.433	264.588	4095	16.342
Ctrl MO CO	Complete Overlap	h6b3	10.104	1082.207	292.361	4095	16.342
Ctrl MO CO	Complete Overlap	h6b3	10.104	1280.417	167.946	4095	16.342
Ctrl MO CO	Complete Overlap	h6b3	10.104	1501.554	218.206	4095	16.342
Ctrl MO CO	Complete Overlap	h6b3	10.104	1517.688	280.157	4095	16.342
Ctrl MO CO	Complete Overlap	h6b3	10.104	1411.142	254.973	4095	16.342
Ctrl MO CO	Complete Overlap	h6b3	10.104	1145.981	178.364	3952.809	16.342
Ctrl MO CO	Complete Overlap
Ctrl MO CO	Complete Overlap	h6b4	9.024	771.216	61.415	2288.273	14.585
Ctrl MO CO	Complete Overlap	h6b4	9.024	936.75	76.321	2836.604	14.585
Ctrl MO CO	Complete Overlap	h6b4	9.024	893.326	62.271	3849.518	14.585
Ctrl MO CO	Complete Overlap	h6b4	9.024	892.604	152.907	4095	14.585
Ctrl MO CO	Complete Overlap	h6b4	9.024	1121.153	170.539	4095	14.585
Ctrl MO CO	Complete Overlap	h6b4	9.024	1612.107	169.647	4095	14.585
Ctrl MO CO	Complete Overlap	h6b4	9.024	1668.58	169.953	4095	14.585
Ctrl MO CO	Complete Overlap	h6b4	9.024	1543.419	184.091	4095	14.585
Ctrl MO CO	Complete Overlap	h6b4	9.024	1256.351	167.043	4095	14.585
Ctrl MO CO	Complete Overlap
Ctrl MO CO	Complete Overlap	h6b5	9.186	919.795	24.746	4094.3	14.848
Ctrl MO CO	Complete Overlap	h6b5	9.186	1054.508	24.38	4095	14.848
Ctrl MO CO	Complete Overlap	h6b5	9.186	1033.063	48.726	4095	14.848
Ctrl MO CO	Complete Overlap	h6b5	9.186	1027.439	58.362	4095	14.848
Ctrl MO CO	Complete Overlap	h6b5	9.186	1204.807	103.097	4095	14.848
Ctrl MO CO	Complete Overlap	h6b5	9.186	1474.524	119.921	4095	14.848
Ctrl MO CO	Complete Overlap	h6b5	9.186	1423.649	93.541	4095	14.848
Ctrl MO CO	Complete Overlap	h6b5	9.186	1194.728	68.54	3956.282	14.848
Ctrl MO CO	Complete Overlap	h6b5	9.186	939.368	120.401	4073.807	14.848
Ctrl MO CO	Complete Overlap
Ctrl MO CO	Complete Overlap	h6b6	7.295	872.545	62.468	2744.832	11.773
Ctrl MO CO	Complete Overlap	h6b6	7.295	983.775	59.385	4094.933	11.773
Ctrl MO CO	Complete Overlap	h6b6	7.295	917.079	37.097	4095	11.773
Ctrl MO CO	Complete Overlap	h6b6	7.295	880.953	104.087	4095	11.773
Ctrl MO CO	Complete Overlap	h6b6	7.295	1047.831	117.981	4095	11.773
Ctrl MO CO	Complete Overlap	h6b6	7.295	1321.185	126.684	4095	11.773
Ctrl MO CO	Complete Overlap	h6b6	7.295	1239.457	130.34	3932.778	11.773
Ctrl MO CO	Complete Overlap
Ctrl MO CO	Complete Overlap	h6b7	5.89	599.377	21.476	2666.119	9.489
Ctrl MO CO	Complete Overlap	h6b7	5.89	703.894	21.009	3502.46	9.489
Ctrl MO CO	Complete Overlap	h6b7	5.89	715.462	43.921	3421.865	9.489
Ctrl MO CO	Complete Overlap	h6b7	5.89	725.863	88.59	2915.495	9.489
Ctrl MO CO	Complete Overlap	h6b7	5.89	896.869	62.634	3525.29	9.489
Ctrl MO CO	Complete Overlap	h6b7	5.89	1201.331	202.837	4095	9.489
Ctrl MO CO	Complete Overlap	h6b7	5.89	1173.32	190.073	3970.681	9.489
Ctrl MO CO	Complete Overlap	h6b7	5.89	1093.119	212.89	3460.109	9.489
Ctrl MO CO	Complete Overlap	h6b7	5.89	1123.345	206.564	2925.378	9.489
Ctrl MO CO	Complete Overlap
Ctrl MO CO	Complete Overlap	h6b8	3.999	928.388	15.121	3425.972	6.408
Ctrl MO CO	Complete Overlap	h6b8	3.999	1084.979	36.023	3399.247	6.408
Ctrl MO CO	Complete Overlap	h6b8	3.999	1132.306	59.75	3925.237	6.408
Ctrl MO CO	Complete Overlap	h6b8	3.999	1248.037	105.832	4095	6.408
Ctrl MO CO	Complete Overlap	h6b8	3.999	1412.914	106.759	4095	6.408
Ctrl MO CO	Complete Overlap	h6b8	3.999	1454.281	231.724	4068.7	6.408
Ctrl MO CO	Complete Overlap	h6b8	3.999	1352.506	207.741	4018.675	6.408
Ctrl MO CO	Complete Overlap
Ctrl MO CO	Complete Overlap	h6b9	9.402	561.107	64.46	2632.206	15.2
Ctrl MO CO	Complete Overlap	h6b9	9.402	882.872	106.007	4095	15.2
Ctrl MO CO	Complete Overlap	h6b9	9.402	1056.055	129.03	4095	15.2
Ctrl MO CO	Complete Overlap	h6b9	9.402	1194.458	184.235	4095	15.2
Ctrl MO CO	Complete Overlap	h6b9	9.402	1183.017	158.506	4095	15.2
Ctrl MO CO	Complete Overlap	h6b9	9.402	1061.69	21.316	4095	15.2
Ctrl MO CO	Complete Overlap	h6b9	9.402	1012.448	28.985	4095	15.2
Ctrl MO CO	Complete Overlap
Ctrl MO CO	Complete Overlap	h6b10	10.212	1042.93	113.223	3307.288	16.517
Ctrl MO CO	Complete Overlap	h6b10	10.212	1237.23	195.635	4095	16.517
Ctrl MO CO	Complete Overlap	h6b10	10.212	1192.501	199.72	4095	16.517
Ctrl MO CO	Complete Overlap	h6b10	10.212	1210.153	146.807	4095	16.517
Ctrl MO CO	Complete Overlap	h6b10	10.212	1531.618	133.965	4095	16.517
Ctrl MO CO	Complete Overlap	h6b10	10.212	1491.329	83.642	4095	16.517
Ctrl MO CO	Complete Overlap	h6b10	10.212	1277.771	127.895	4095	16.517
Ctrl MO CO	Complete Overlap	h6b10	10.212	1062.273	131.398	4095	16.517
Ctrl MO CO	Complete Overlap	h6b10	10.212	868.719	97.308	4095	16.517
Ctrl MO CO	Complete Overlap
Ctrl MO CO	Complete Overlap	h6b11	13.022	965.458	67.645	3204.52	21.086
Ctrl MO CO	Complete Overlap	h6b11	13.022	1134.561	111.41	4095	21.086
Ctrl MO CO	Complete Overlap	h6b11	13.022	1077.392	145.651	4095	21.086
Ctrl MO CO	Complete Overlap	h6b11	13.022	1124.064	236.526	4095	21.086
Ctrl MO CO	Complete Overlap	h6b11	13.022	1409.703	211.36	4095	21.086
Ctrl MO CO	Complete Overlap	h6b11	13.022	1655.939	145.262	4095	21.086
Ctrl MO CO	Complete Overlap	h6b11	13.022	1551.263	217.867	4095	21.086
Ctrl MO CO	Complete Overlap	h6b11	13.022	1256.016	197.835	4095	21.086
Ctrl MO CO	Complete Overlap	h6b11	13.022	905.467	179.956	4077.003	21.086
Ctrl MO CO	Complete Overlap
Ctrl MO CO	Complete Overlap	h6b12	9.618	663.57	76.761	2854.698	15.551
Ctrl MO CO	Complete Overlap	h6b12	9.618	894.516	124.635	3808.829	15.551
Ctrl MO CO	Complete Overlap	h6b12	9.618	904.713	84.321	3715.379	15.551
Ctrl MO CO	Complete Overlap	h6b12	9.618	919.313	113.512	3564.698	15.551
Ctrl MO CO	Complete Overlap	h6b12	9.618	979.526	148.099	3391.745	15.551
Ctrl MO CO	Complete Overlap	h6b12	9.618	1079.549	146.476	4091.961	15.551
Ctrl MO CO	Complete Overlap	h6b12	9.618	1086.156	133.881	4051.025	15.551
Ctrl MO CO	Complete Overlap	h6b12	9.618	1031.176	213.346	4095	15.551
Ctrl MO CO	Complete Overlap	h6b12	9.618	1030.462	212.278	3947.423	15.551
Ctrl MO CO	Complete Overlap
Ctrl MO CO	Complete Overlap	h6b13	10.591	359.01	0.118	1633.902	17.132
Ctrl MO CO	Complete Overlap	h6b13	10.591	543.11	0.141	2733.49	17.132
Ctrl MO CO	Complete Overlap	h6b13	10.266	821.405	12.75	3240.731	16.605
Ctrl MO CO	Complete Overlap	h6b13	10.266	614.28	25.056	3618.594	16.605
Ctrl MO CO	Complete Overlap	h6b13	10.266	419.749	64.609	2659.844	16.605
Ctrl MO CO	Complete Overlap	h6b13	10.266	499.588	36.675	2680.798	16.605
Ctrl MO CO	Complete Overlap	h6b13	10.266	592.532	20.978	3027.496	16.605
Ctrl MO CO	Complete Overlap	h7b1	11.888	737.477	39.812	3755.242	19.24
Ctrl MO CO	Complete Overlap	h7b1	11.888	1072.326	12.745	3733.886	19.24
Ctrl MO CO	Complete Overlap	h7b1	11.888	1009.015	6.661	4094.299	19.24
Ctrl MO CO	Complete Overlap	h7b1	11.888	921.299	76.846	4085.087	19.24
Ctrl MO CO	Complete Overlap	h7b1	11.888	902.948	72.586	4093.703	19.24
Ctrl MO CO	Complete Overlap	h7b1	11.888	852.618	124.053	3946.143	19.24
Ctrl MO CO	Complete Overlap	h7b1	11.888	775.232	113.302	4050.091	19.24
Ctrl MO CO	Complete Overlap	h7b1	11.888	716.945	65.582	3404.391	19.24
Ctrl MO CO	Complete Overlap	h7b1	11.888	633.593	36.096	4095	19.24
Ctrl MO CO	Complete Overlap
Ctrl MO CO	Complete Overlap	h7b2	10.05	175.578	0.006	1395.848	16.254
Ctrl MO CO	Complete Overlap	h7b2	10.05	277.206	0.354	2674.872	16.254
Ctrl MO CO	Complete Overlap	h7b2	10.05	320.047	0.289	3002.665	16.254
Ctrl MO CO	Complete Overlap	h7b2	10.05	517.742	14.701	3140.602	16.254
Ctrl MO CO	Complete Overlap	h7b2	12.05	783.775	45.447	4086.205	19.505
Ctrl MO CO	Complete Overlap	h7b2	12.05	896.337	52.407	4095	19.505
Ctrl MO CO	Complete Overlap	h7b2	12.05	880.717	63.078	3821.586	19.505
Ctrl MO CO	Complete Overlap	h7b2	12.05	863.4	64.803	4095	19.505
Ctrl MO CO	Complete Overlap	h7b2	12.05	838.104	36.277	4095	19.505
Ctrl MO CO	Complete Overlap	h7b2	12.05	824.374	14.88	4095	19.505
Ctrl MO CO	Complete Overlap	h7b2	12.05	739.511	8.826	4095	19.505
Ctrl MO CO	Complete Overlap	h8b1	11.942	724.664	24.573	4065.966	19.329
Ctrl MO CO	Complete Overlap	h8b1	11.942	731.767	47.509	4087.733	19.329
Ctrl MO CO	Complete Overlap	h8b1	11.942	881.819	79.948	4024.155	19.329
Ctrl MO CO	Complete Overlap	h8b1	12.752	1461.998	128.461	4095	20.646
Ctrl MO CO	Complete Overlap	h8b1	12.752	1517.068	89.912	4095	20.646
Ctrl MO CO	Complete Overlap	h8b1	12.752	1212.277	97.513	4095	20.646
Ctrl MO CO	Complete Overlap	h8b1	12.752	942.232	53.332	4095	20.646
Ctrl MO CO	Complete Overlap
Ctrl MO CO	Complete Overlap	h8b2	8.862	1087.08	9.994	3818.596	14.321
Ctrl MO CO	Complete Overlap	h8b2	8.862	1360.552	58.799	4085.533	14.321
Ctrl MO CO	Complete Overlap	h8b2	8.862	1135.995	111.092	4093.201	14.321
Ctrl MO CO	Complete Overlap	h8b2	8.862	1073.272	216.162	4095	14.321
Ctrl MO CO	Complete Overlap	h8b2	8.862	1276.808	115.794	3994.952	14.321
Ctrl MO CO	Complete Overlap	h8b2	8.862	1492.616	145.288	4095	14.321
Ctrl MO CO	Complete Overlap	h8b2	8.862	1541.947	177.927	4095	14.321
Ctrl MO CO	Complete Overlap	h8b2	8.862	1224.743	155.091	4077.753	14.321
Ctrl MO CO	Complete Overlap
Ctrl MO CO	Complete Overlap	h8b3	5.025	1436.019	184.398	4095	8.083
Ctrl MO CO	Complete Overlap	h8b3	5.025	2213.158	218.649	4095	8.083
Ctrl MO CO	Complete Overlap	h8b3	5.025	2545.02	175.962	4095	8.083
Ctrl MO CO	Complete Overlap	h8b3	5.025	2476.077	168.305	4095	8.083
Ctrl MO CO	Complete Overlap	h8b3	5.025	1931.988	113.77	4095	8.083
Ctrl MO CO	Complete Overlap	h8b3	5.025	1177.617	112.314	4093.091	8.083
Ctrl MO CO	Complete Overlap
Ctrl MO CO	Complete Overlap	h8b4	5.998	1462.152	115.01	4095	9.664
Ctrl MO CO	Complete Overlap	h8b4	5.998	1597.38	304.746	4095	9.664
Ctrl MO CO	Complete Overlap	h8b4	5.998	2280.732	277.449	4095	9.664
Ctrl MO CO	Complete Overlap	h8b4	5.998	2289.697	411.742	4095	9.664
Ctrl MO CO	Complete Overlap	h8b4	5.998	1996.438	424.505	4095	9.664
Ctrl MO CO	Complete Overlap	h8b4	5.998	1252.125	222.812	4095	9.664
Ctrl MO CO	Complete Overlap
Ctrl MO CO	Complete Overlap	h8b5	8.591	591.722	25.883	3178.728	13.881
Ctrl MO CO	Complete Overlap	h8b5	8.591	760.128	40.06	3560.3	13.881
Ctrl MO CO	Complete Overlap	h8b5	8.591	916.062	26.756	3768.948	13.881
Ctrl MO CO	Complete Overlap	h8b5	8.591	1523.829	134.796	4095	13.881
Ctrl MO CO	Complete Overlap	h8b5	8.591	1739.192	158.309	4095	13.881
Ctrl MO CO	Complete Overlap	h8b5	8.591	1871.442	248.927	4095	13.881
Ctrl MO CO	Complete Overlap	h8b5	8.591	2149.553	238.287	4095	13.881
Ctrl MO CO	Complete Overlap	h8b5	8.591	2444.5	260.6	4095	13.881
Ctrl MO CO	Complete Overlap	h8b5	8.591	2241.097	282.27	4095	13.881
Ctrl MO PO	Partial Overlap	h1b1	9.186	777.804	26.187	3984.41	14.848
Ctrl MO PO	Partial Overlap	h1b1	9.186	751.217	47.16	4095	14.848
Ctrl MO PO	Partial Overlap	h1b1	9.186	732.681	41.444	4095	14.848
Ctrl MO PO	Partial Overlap	h1b1	9.186	725.565	55.194	3757.341	14.848
Ctrl MO PO	Partial Overlap	h1b1	9.186	778.29	78.766	3766.455	14.848
Ctrl MO PO	Partial Overlap	h1b1	9.348	1350.468	127.807	4095	15.112
Ctrl MO PO	Partial Overlap	h1b1	9.348	1085.093	88.706	4095	15.112
Ctrl MO PO	Partial Overlap	h1b1	9.348	648.926	23.588	2782.252	15.112
Ctrl MO PO	Partial Overlap
Ctrl MO PO	Partial Overlap	h1b2	10.483	981.54	36.895	2866.797	16.957
Ctrl MO PO	Partial Overlap	h1b2	10.483	1074.862	103.826	4095	16.957
Ctrl MO PO	Partial Overlap	h1b2	10.483	1008.366	189.37	4095	16.957
Ctrl MO PO	Partial Overlap	h1b2	10.483	1225.831	242.898	4095	16.957
Ctrl MO PO	Partial Overlap	h1b2	10.483	1620.593	254.166	4095	16.957
Ctrl MO PO	Partial Overlap	h1b2	10.483	1886.924	319.925	4095	16.957
Ctrl MO PO	Partial Overlap	h1b2	10.483	1682.503	209.552	4095	16.957
Ctrl MO PO	Partial Overlap	h1b2	10.483	1508.954	196.993	4095	16.957
Ctrl MO PO	Partial Overlap
Ctrl MO PO	Partial Overlap	h1b3	10.158	988.506	21.436	3497.406	16.43
Ctrl MO PO	Partial Overlap	h1b3	10.158	1023.861	91.092	4095	16.43
Ctrl MO PO	Partial Overlap	h1b3	10.158	873.789	64.105	4095	16.43
Ctrl MO PO	Partial Overlap	h1b3	10.158	781.823	86.13	3840.812	16.43
Ctrl MO PO	Partial Overlap	h1b3	10.158	802.255	68.596	4095	16.43
Ctrl MO PO	Partial Overlap	h1b3	10.537	1757.041	115.666	4095	17.044
Ctrl MO PO	Partial Overlap	h1b3	10.537	1522.036	130.514	4095	17.044
Ctrl MO PO	Partial Overlap	h2b1	8.375	507.634	13.432	2348.408	13.53
Ctrl MO PO	Partial Overlap	h2b1	8.375	748.656	48.086	4095	13.53
Ctrl MO PO	Partial Overlap	h2b1	8.375	1086.02	106.033	4095	13.53
Ctrl MO PO	Partial Overlap	h2b1	8.375	1118.404	106.191	4095	13.53
Ctrl MO PO	Partial Overlap	h2b1	8.375	1253.763	111.194	4095	13.53
Ctrl MO PO	Partial Overlap	h2b1	8.375	1333.966	54.024	4095	13.53
Ctrl MO PO	Partial Overlap	h2b1	8.375	1468.604	229.094	4095	13.53
Ctrl MO PO	Partial Overlap	h2b1	8.375	1477.472	300.843	4095	13.53
Ctrl MO PO	Partial Overlap
Ctrl MO PO	Partial Overlap	h2b2	11.401	1051.234	65.315	4095	18.45
Ctrl MO PO	Partial Overlap	h2b2	11.401	1125.836	77.283	4095	18.45
Ctrl MO PO	Partial Overlap	h2b2	11.401	1276.649	89.035	4095	18.45
Ctrl MO PO	Partial Overlap	h2b2	11.401	1637.712	90.972	4095	18.45
Ctrl MO PO	Partial Overlap	h2b2	11.401	1935.685	187.019	4095	18.45
Ctrl MO PO	Partial Overlap
Ctrl MO PO	Partial Overlap	h2b3	5.89	995.026	118.462	4083.931	9.489
Ctrl MO PO	Partial Overlap	h2b3	5.89	1370.11	201.452	4095	9.489
Ctrl MO PO	Partial Overlap	h2b3	5.89	1650.358	273.842	4095	9.489
Ctrl MO PO	Partial Overlap	h2b3	5.403	2301.978	337.954	4095	8.698
Ctrl MO PO	Partial Overlap	h2b3	5.403	2395.974	438.741	4095	8.698
Ctrl MO PO	Partial Overlap	h2b3	5.403	1867.906	471.706	4084.491	8.698
Ctrl MO PO	Partial Overlap	h2b3	5.403	789.126	125.146	3978.679	8.698
Ctrl MO PO	Partial Overlap	h3b1	9.564	959.147	91.08	3806.279	15.463
Ctrl MO PO	Partial Overlap	h3b1	9.564	1035.368	56.24	3770.958	15.463
Ctrl MO PO	Partial Overlap	h3b1	9.564	1140.023	98.537	4095	15.463
Ctrl MO PO	Partial Overlap	h3b1	9.564	1232.812	95.398	4095	15.463
Ctrl MO PO	Partial Overlap	h3b1	9.564	1252.087	63.262	4095	15.463
Ctrl MO PO	Partial Overlap	h3b1	9.564	1298.191	110.778	4095	15.463
Ctrl MO PO	Partial Overlap	h3b1	9.564	1298.729	93.42	4095	15.463
Ctrl MO PO	Partial Overlap	h3b1	9.564	1097.811	80.129	4095	15.463
Ctrl MO PO	Partial Overlap	h3b1	9.564	920.919	64.55	3270.346	15.463
Ctrl MO PO	Partial Overlap
Ctrl MO PO	Partial Overlap	h3b2	8.591	1161.589	93.629	3696.69	13.882
Ctrl MO PO	Partial Overlap	h3b2	8.591	1278.758	134.236	4091.396	13.882
Ctrl MO PO	Partial Overlap	h3b2	8.591	1832.392	170.89	4095	13.882
Ctrl MO PO	Partial Overlap	h3b2	8.591	2085.28	135.377	4095	13.882
Ctrl MO PO	Partial Overlap	h3b2	8.591	2089.537	184.016	4095	13.882
Ctrl MO PO	Partial Overlap	h3b2	8.591	2068.37	260.458	4095	13.882
Ctrl MO PO	Partial Overlap	h3b2	8.591	1476.919	267.196	4095	13.882
Ctrl MO PO	Partial Overlap	h3b2	8.591	591.473	190.843	1602.126	13.882
Ctrl MO PO	Partial Overlap
Ctrl MO PO	Partial Overlap	h3b3	9.942	907.538	25.086	4030.665	16.078
Ctrl MO PO	Partial Overlap	h3b3	9.942	1027.634	41.812	4095	16.078
Ctrl MO PO	Partial Overlap	h3b3	9.942	1016.251	79.708	4095	16.078
Ctrl MO PO	Partial Overlap	h3b3	9.942	1343.054	200.851	4095	16.078
Ctrl MO PO	Partial Overlap	h3b3	9.942	1805.297	240.769	4095	16.078
Ctrl MO PO	Partial Overlap	h3b3	9.942	2110.306	283.981	4095	16.078
Ctrl MO PO	Partial Overlap	h3b3	9.942	2338.661	208.026	4095	16.078
Ctrl MO PO	Partial Overlap	h3b3	9.942	1966.043	312.756	4095	16.078
Ctrl MO PO	Partial Overlap	h3b3	9.942	1268.411	104.543	4095	16.078
Ctrl MO PO	Partial Overlap	h5b1	17.237	1235.942	115.864	4077.024	27.929
Ctrl MO PO	Partial Overlap	h5b1	17.237	1504.01	126.868	4095	27.929
Ctrl MO PO	Partial Overlap	h5b1	17.237	1492.513	110.002	4095	27.929
Ctrl MO PO	Partial Overlap	h5b1	17.237	1620.073	89.395	4095	27.929
Ctrl MO PO	Partial Overlap	h5b1	17.237	1608.066	84.254	4095	27.929
Ctrl MO PO	Partial Overlap	h5b1	17.237	1343.46	103.083	4095	27.929
Ctrl MO PO	Partial Overlap	h5b1	17.237	1250.379	115.008	4095	27.929
Ctrl MO PO	Partial Overlap	h5b1	16.751	2076.115	136.996	4095	27.148
Ctrl MO PO	Partial Overlap	h5b1	16.751	1803.579	157.792	4095	27.148
Ctrl MO PO	Partial Overlap	h5b1	16.751	1464.329	127.689	4095	27.148
Ctrl MO PO	Partial Overlap
Ctrl MO PO	Partial Overlap	h5b2	10.266	1512.231	139.125	4086.763	16.605
Ctrl MO PO	Partial Overlap	h5b2	10.266	1750.979	174.543	4017.619	16.605
Ctrl MO PO	Partial Overlap	h5b2	10.266	1726.561	234.701	4092.94	16.605
Ctrl MO PO	Partial Overlap	h5b2	10.266	1890.006	218.435	4095	16.605
Ctrl MO PO	Partial Overlap	h5b2	10.266	2297.039	271.936	4095	16.605
Ctrl MO PO	Partial Overlap	h5b2	10.266	1688.98	294.386	4095	16.605
Ctrl MO PO	Partial Overlap	h5b2	10.266	1420.363	281.58	4095	16.605
Ctrl MO PO	Partial Overlap	h5b2	10.266	1619.815	140.813	4095	16.605
Ctrl MO PO	Partial Overlap
Ctrl MO PO	Partial Overlap	h5b3	10.753	1059.397	10.264	4076.164	17.396
Ctrl MO PO	Partial Overlap	h5b3	10.753	905.047	35.384	4095	17.396
Ctrl MO PO	Partial Overlap	h5b3	10.753	803.393	28.127	4095	17.396
Ctrl MO PO	Partial Overlap	h5b3	10.753	747.509	49.434	4095	17.396
Ctrl MO PO	Partial Overlap	h5b3	10.591	1923.354	128.633	4095	17.132
Ctrl MO PO	Partial Overlap	h5b3	10.591	1563.888	64.977	4095	17.132
Ctrl MO PO	Partial Overlap	h5b3	11.401	2048.711	188.028	4095	18.45
Ctrl MO PO	Partial Overlap	h5b3	11.401	1714.583	220.498	4095	18.45
Ctrl MO PO	Partial Overlap	h5b3	11.401	1514.084	283.583	4095	18.45
Ctrl MO PO	Partial Overlap	h5b3	11.401	1439.438	210.102	4095	18.45
Ctrl MO PO	Partial Overlap	h6b1	4.431	998.541	52.458	4093.832	7.116
Ctrl MO PO	Partial Overlap	h6b1	4.431	1015.146	121.249	4095	7.116
Ctrl MO PO	Partial Overlap	h6b1	4.431	1046.561	133.631	4094.709	7.116
Ctrl MO PO	Partial Overlap	h6b1	4.431	1213.264	167.374	4095	7.116
Ctrl MO PO	Partial Overlap	h6b1	4.431	1389.868	189.267	4095	7.116
Ctrl MO PO	Partial Overlap	h6b1	4.431	1165.706	231.614	4090.816	7.116
Ctrl MO PO	Partial Overlap	h6b1	4.431	1012.329	255.044	3371.671	7.116
Ctrl MO PO	Partial Overlap
Ctrl MO PO	Partial Overlap	h6b2	10.212	1212.295	98.676	4095	16.517
Ctrl MO PO	Partial Overlap	h6b2	10.212	1161.711	157.9	4095	16.517
Ctrl MO PO	Partial Overlap	h6b2	10.212	1243.906	151.736	4095	16.517
Ctrl MO PO	Partial Overlap	h6b2	10.212	1500.697	194.093	4093.683	16.517
Ctrl MO PO	Partial Overlap	h6b2	10.212	1395.703	206.133	4095	16.517
Ctrl MO PO	Partial Overlap	h6b2	10.212	1307.616	134.751	4095	16.517
Ctrl MO PO	Partial Overlap	h6b2	10.212	1282.16	89.93	4094.118	16.517
Ctrl MO PO	Partial Overlap
Ctrl MO PO	Partial Overlap	h6b3	11.347	1172.151	47.982	4095	18.362
Ctrl MO PO	Partial Overlap	h6b3	11.347	1131.725	37.306	4095	18.362
Ctrl MO PO	Partial Overlap	h6b3	11.347	978.667	27.775	4095	18.362
Ctrl MO PO	Partial Overlap	h6b3	11.347	879.381	28.159	4095	18.362
Ctrl MO PO	Partial Overlap	h6b3	11.347	997.094	96.09	4095	18.362
Ctrl MO PO	Partial Overlap	h6b3	11.347	1157.272	63.06	4095	18.362
Ctrl MO PO	Partial Overlap	h6b3	11.347	1158.049	87.733	4087.503	18.362
Ctrl MO PO	Partial Overlap	h6b3	11.347	1172.842	89.39	4095	18.362
Ctrl MO PO	Partial Overlap	h6b3	11.347	1123.776	104.684	4095	18.362
Ctrl MO PO	Partial Overlap	h6b3	11.347	980.798	55.989	4095	18.362
Ctrl MO PO	Partial Overlap
Ctrl MO PO	Partial Overlap	h6b4	6.646	823.3	56.782	2727.354	10.719
Ctrl MO PO	Partial Overlap	h6b4	6.646	1017.985	55.766	3866.861	10.719
Ctrl MO PO	Partial Overlap	h6b4	6.646	924.619	66.562	4067.531	10.719
Ctrl MO PO	Partial Overlap	h6b4	6.646	857.363	94.613	4095	10.719
Ctrl MO PO	Partial Overlap	h6b4	6.646	1059.119	112.661	4095	10.719
Ctrl MO PO	Partial Overlap	h6b4	6.646	1484.561	147.707	4095	10.719
Ctrl MO PO	Partial Overlap	h6b4	6.646	1575.627	141.643	4095	10.719
Ctrl MO PO	Partial Overlap	h6b4	6.646	1578.342	225.058	4095	10.719
Ctrl MO PO	Partial Overlap	h6b4	6.646	1438.43	251.948	4095	10.719
Ctrl MO PO	Partial Overlap	h6b4	6.646	1155.543	206.418	3151.475	10.719
Ctrl MO PO	Partial Overlap	h7b1	5.511	688.205	6.534	4095	8.874
Ctrl MO PO	Partial Overlap	h7b1	5.511	882.441	21.56	4095	8.874
Ctrl MO PO	Partial Overlap	h7b1	5.511	849.581	43.16	4095	8.874
Ctrl MO PO	Partial Overlap	h7b1	5.511	828.305	22.735	4095	8.874
Ctrl MO PO	Partial Overlap	h7b1	5.511	832.036	28.714	4003.538	8.874
Ctrl MO PO	Partial Overlap	h8b1	10.321	873.893	73.722	4095	16.693
Ctrl MO PO	Partial Overlap	h8b1	10.321	1074.572	90.871	4095	16.693
Ctrl MO PO	Partial Overlap	h8b1	10.321	1246.788	109.891	4095	16.693
Ctrl MO PO	Partial Overlap	h8b1	10.321	1253.711	198.784	4095	16.693
Ctrl MO PO	Partial Overlap	h8b1	10.321	1317.208	166.783	4095	16.693
Ctrl MO PO	Partial Overlap	h8b1	10.321	1521.119	153.48	4095	16.693
Ctrl MO PO	Partial Overlap	h8b1	10.321	1860.39	274.211	4095	16.693
Ctrl MO PO	Partial Overlap	h8b1	10.321	1891.597	191.118	4095	16.693
Ctrl MO PO	Partial Overlap
Ctrl MO PO	Partial Overlap	h8b2	8.645	1331.184	27.719	4079.39	13.97
Ctrl MO PO	Partial Overlap	h8b2	8.645	1114.586	46.147	4095	13.97
Ctrl MO PO	Partial Overlap	h8b2	8.645	817.524	136.275	4095	13.97
Ctrl MO PO	Partial Overlap	h8b2	8.7	1466.471	207.31	4095	14.057
Ctrl MO PO	Partial Overlap	h8b2	8.7	1652.319	409.777	4095	14.057
Ctrl MO PO	Partial Overlap	h8b2	8.7	1858.034	366.177	4095	14.057
Ctrl MO PO	Partial Overlap	h8b2	8.7	1608.47	171.239	4095	14.057
Ctrl MO PO	Partial Overlap	h8b2	8.7	987.459	76.058	4095	14.057
Ctrl MO PO	Partial Overlap
Ctrl MO PO	Partial Overlap	h8b3	12.374	544.515	44.197	2435.576	20.032
Ctrl MO PO	Partial Overlap	h8b3	12.374	736.193	11.889	3549.098	20.032
Ctrl MO PO	Partial Overlap	h8b3	12.374	919.72	36.395	4056.565	20.032
Ctrl MO PO	Partial Overlap	h8b3	12.374	1039.343	63.669	4089.195	20.032
Ctrl MO PO	Partial Overlap	h8b3	12.374	1125.8	137.667	4095	20.032
Ctrl MO PO	Partial Overlap	h8b3	12.374	1157.395	134.962	4095	20.032
Ctrl MO PO	Partial Overlap	h8b3	12.374	1308.292	95.27	4095	20.032
Ctrl MO PO	Partial Overlap	h8b3	12.374	1583.222	121.311	4095	20.032
Ctrl MO PO	Partial Overlap
Ctrl MO PO	Partial Overlap	h8b4	8.375	1197.447	31.684	3985.133	13.53
Ctrl MO PO	Partial Overlap	h8b4	8.375	1461.864	30.675	4095	13.53
Ctrl MO PO	Partial Overlap	h8b4	8.375	1281.09	29.468	4095	13.53
Ctrl MO PO	Partial Overlap	h8b4	8.375	963.483	155.709	3997.372	13.53
Ctrl MO PO	Partial Overlap	h8b4	8.375	928.222	128.02	3562.872	13.53
Ctrl MO PO	Partial Overlap	h8b4	9.186	1407.592	112.831	4095	14.847
Ctrl MO PO	Partial Overlap	h8b4	9.186	1508.332	312.27	4093.543	14.847
Ctrl MO PO	Partial Overlap	h8b4	9.186	1391.472	282.771	4076.479	14.847
Ctrl MO PO	Partial Overlap	h8b4	9.186	1319.689	239.935	4095	14.847
Ctrl MO NO	No Overlap	h1b1	16.102	991.808	90.751	4023.594	26.094
Ctrl MO NO	No Overlap	h1b1	16.102	1169.601	139.726	4095	26.094
Ctrl MO NO	No Overlap	h1b1	16.102	1306.819	207.766	4095	26.094
Ctrl MO NO	No Overlap	h1b1	16.21	1696.265	155.944	4095	26.27
Ctrl MO NO	No Overlap	h1b1	16.21	2113.895	132.507	4095	26.27
Ctrl MO NO	No Overlap	h1b1	16.21	2092.474	226.602	4095	26.27
Ctrl MO NO	No Overlap	h1b1	16.21	1414.462	230.641	4095	26.27
Ctrl MO NO	No Overlap
Ctrl MO NO	No Overlap	h1b2	11.888	985.759	58.386	4043.287	19.241
Ctrl MO NO	No Overlap	h1b2	11.888	996.139	104.785	4095	19.241
Ctrl MO NO	No Overlap	h1b2	11.888	1082.094	82.095	4095	19.241
Ctrl MO NO	No Overlap	h1b2	11.888	1235.865	99.02	4095	19.241
Ctrl MO NO	No Overlap	h1b2	11.888	1507.305	127.973	4095	19.241
Ctrl MO NO	No Overlap	h1b2	11.888	2036.887	172.742	4095	19.241
Ctrl MO NO	No Overlap	h1b2	11.888	1768.635	218.16	4095	19.241
Ctrl MO NO	No Overlap	h1b2	11.888	1501.287	184.731	4095	19.241
Ctrl MO NO	No Overlap
Ctrl MO NO	No Overlap	h1b3	10.915	344.575	4.952	1060.544	17.659
Ctrl MO NO	No Overlap	h1b3	10.915	774.129	14.948	2379.041	17.659
Ctrl MO NO	No Overlap	h1b3	10.915	856.719	55.024	4005.851	17.659
Ctrl MO NO	No Overlap	h1b3	10.915	766.923	44.176	4038.928	17.659
Ctrl MO NO	No Overlap	h1b3	10.915	797.95	43.716	4095	17.659
Ctrl MO NO	No Overlap	h1b3	10.915	888.485	42.511	4095	17.659
Ctrl MO NO	No Overlap	h1b3	10.915	733.492	57.838	4095	17.659
Ctrl MO NO	No Overlap
Ctrl MO NO	No Overlap	h1b4	9.456	418.839	36.343	1526.044	15.287
Ctrl MO NO	No Overlap	h1b4	9.456	749.495	91.321	3459.718	15.287
Ctrl MO NO	No Overlap	h1b4	9.456	972.621	153.211	4095	15.287
Ctrl MO NO	No Overlap	h1b4	9.456	1171.573	146.141	4095	15.287
Ctrl MO NO	No Overlap	h1b4	9.456	1423.539	171.775	4095	15.287
Ctrl MO NO	No Overlap	h1b4	9.456	1641.078	160.372	4095	15.287
Ctrl MO NO	No Overlap	h1b4	9.456	1256.274	137.654	4095	15.287
Ctrl MO NO	No Overlap
Ctrl MO NO	No Overlap	h1b5	11.455	323.849	3.527	1363.996	18.537
Ctrl MO NO	No Overlap	h1b5	11.455	583.279	35.762	2817.283	18.537
Ctrl MO NO	No Overlap	h1b5	11.455	616.13	60.013	3005.238	18.537
Ctrl MO NO	No Overlap	h1b5	11.455	657.598	53.284	3798.158	18.537
Ctrl MO NO	No Overlap	h1b5	11.455	737.675	44.582	4095	18.537
Ctrl MO NO	No Overlap	h1b5	11.455	1018.068	82.355	4095	18.537
Ctrl MO NO	No Overlap	h1b5	11.455	1389.935	92.924	4095	18.537
Ctrl MO NO	No Overlap	h1b5	11.455	1412.508	55.199	4095	18.537
Ctrl MO NO	No Overlap	h1b5	11.455	1339.299	78.077	4095	18.537
Ctrl MO NO	No Overlap	h1b5	11.455	1122.68	156.894	4095	18.537
Ctrl MO NO	No Overlap	h1b5	11.455	757.122	73.581	4095	18.537
Ctrl MO NO	No Overlap
Ctrl MO NO	No Overlap	h1b6	9.834	502.794	12.928	1496.065	15.902
Ctrl MO NO	No Overlap	h1b6	9.834	669.931	38.952	2923.779	15.902
Ctrl MO NO	No Overlap	h1b6	9.834	584.533	19.781	3000.312	15.902
Ctrl MO NO	No Overlap	h1b6	9.834	550.966	47.316	2338.593	15.902
Ctrl MO NO	No Overlap	h1b6	9.834	556.598	18.363	2989.379	15.902
Ctrl MO NO	No Overlap	h1b6	10.375	809.368	14.666	4095	16.781
Ctrl MO NO	No Overlap	h1b6	10.375	806.068	36.707	4095	16.781
Ctrl MO NO	No Overlap	h1b6	10.375	686.279	40.358	4095	16.781
Ctrl MO NO	No Overlap
Ctrl MO NO	No Overlap	h1b7	11.455	305.679	2.11	1187.042	18.538
Ctrl MO NO	No Overlap	h1b7	11.455	691.933	10.825	4070.745	18.538
Ctrl MO NO	No Overlap	h1b7	11.455	696.142	32.531	4095	18.538
Ctrl MO NO	No Overlap	h1b7	11.455	661.679	36.684	4095	18.538
Ctrl MO NO	No Overlap	h1b7	11.455	705.687	97.575	4095	18.538
Ctrl MO NO	No Overlap	h1b7	11.455	990.403	38.781	4095	18.538
Ctrl MO NO	No Overlap	h1b7	11.509	1968.71	161.965	4095	18.626
Ctrl MO NO	No Overlap	h1b7	11.509	1899.482	163	4095	18.626
Ctrl MO NO	No Overlap	h1b7	11.509	1477.746	69.737	4094.833	18.626
Ctrl MO NO	No Overlap	h1b7	11.509	955.409	97.515	4095	18.626
Ctrl MO NO	No Overlap	h2b1	12.212	786.647	55.933	2899.186	19.768
Ctrl MO NO	No Overlap	h2b1	12.212	1030.779	75.636	4095	19.768
Ctrl MO NO	No Overlap	h2b1	12.212	1196.414	110.893	4095	19.768
Ctrl MO NO	No Overlap	h2b1	12.212	1571.968	113.335	4095	19.768
Ctrl MO NO	No Overlap	h2b1	12.212	1620.161	145.353	4095	19.768
Ctrl MO NO	No Overlap	h2b1	12.212	1696.878	157.378	4095	19.768
Ctrl MO NO	No Overlap	h2b1	12.212	1674.087	151.282	4095	19.768
Ctrl MO NO	No Overlap	h2b1	12.212	1657.482	227.734	4095	19.768
Ctrl MO NO	No Overlap
Ctrl MO NO	No Overlap	h2b2	12.806	997.504	99.227	3199.421	20.734
Ctrl MO NO	No Overlap	h2b2	12.806	1005.463	175.362	2680.359	20.734
Ctrl MO NO	No Overlap	h2b2	12.806	1250.221	221.074	3592.401	20.734
Ctrl MO NO	No Overlap	h2b2	12.806	1412.218	182.908	3797.143	20.734
Ctrl MO NO	No Overlap	h2b2	12.806	1735.642	102.604	4095	20.734
Ctrl MO NO	No Overlap	h2b2	12.806	1881.834	35.813	4095	20.734
Ctrl MO NO	No Overlap	h2b2	12.806	1293.717	26.808	4095	20.734
Ctrl MO NO	No Overlap
Ctrl MO NO	No Overlap	h2b3	9.564	754.794	56.152	2890.162	15.463
Ctrl MO NO	No Overlap	h2b3	9.564	850.805	109.961	3337.752	15.463
Ctrl MO NO	No Overlap	h2b3	9.564	1041.886	151.905	3982.828	15.463
Ctrl MO NO	No Overlap	h2b3	9.564	1163.158	79.073	4020.071	15.463
Ctrl MO NO	No Overlap	h2b3	9.564	1390.899	93.594	4095	15.463
Ctrl MO NO	No Overlap	h2b3	9.564	1506.491	129.916	4095	15.463
Ctrl MO NO	No Overlap	h2b3	9.564	1314.165	55.285	4095	15.463
Ctrl MO NO	No Overlap
Ctrl MO NO	No Overlap	h2b4	10.861	977.488	32.434	4095	17.572
Ctrl MO NO	No Overlap	h2b4	10.861	1007.35	55.812	4095	17.572
Ctrl MO NO	No Overlap	h2b4	10.861	936.162	82.391	4049.971	17.572
Ctrl MO NO	No Overlap	h2b4	10.915	1529.861	98.049	4095	17.659
Ctrl MO NO	No Overlap	h2b4	10.915	1626.013	134.051	4095	17.659
Ctrl MO NO	No Overlap	h2b4	11.833	2128.835	346.573	4095	19.153
Ctrl MO NO	No Overlap	h2b4	11.833	1833.985	336.855	4095	19.153
Ctrl MO NO	No Overlap	h2b4	11.833	1146.111	196.493	4095	19.153
Ctrl MO NO	No Overlap	h3b1	6.646	734.165	72.621	2417.218	10.719
Ctrl MO NO	No Overlap	h3b1	6.646	951.924	74.139	3153.221	10.719
Ctrl MO NO	No Overlap	h3b1	6.646	964.177	158.169	3540.984	10.719
Ctrl MO NO	No Overlap	h3b1	6.646	1399.004	224.69	4095	10.719
Ctrl MO NO	No Overlap	h3b1	6.646	1782.976	129.006	4095	10.719
Ctrl MO NO	No Overlap	h3b1	6.646	2091.873	113.555	4095	10.719
Ctrl MO NO	No Overlap	h3b1	6.646	2272.642	136.485	4095	10.719
Ctrl MO NO	No Overlap	h3b1	6.646	2201.972	194.794	4095	10.719
Ctrl MO NO	No Overlap	h3b1	6.646	1509.354	203.782	4095	10.719
Ctrl MO NO	No Overlap
Ctrl MO NO	No Overlap	h3b2	10.915	435.961	7.052	2215.944	17.659
Ctrl MO NO	No Overlap	h3b2	10.915	506.152	7.362	2901.549	17.659
Ctrl MO NO	No Overlap	h3b2	10.915	446.384	9.807	2981.202	17.659
Ctrl MO NO	No Overlap	h3b2	10.915	392.878	48.702	3918.396	17.659
Ctrl MO NO	No Overlap	h3b2	10.915	415.918	30.23	4095	17.659
Ctrl MO NO	No Overlap	h3b2	11.563	1716.004	161.661	4095	18.713
Ctrl MO NO	No Overlap	h3b2	11.563	1972.712	203.039	4095	18.713
Ctrl MO NO	No Overlap	h3b2	11.563	2047.789	291.175	4095	18.713
Ctrl MO NO	No Overlap	h3b2	11.563	1328.469	198.466	4095	18.713
Ctrl MO NO	No Overlap	h3b2	11.563	1037.732	200.303	4076.405	18.713
Ctrl MO NO	No Overlap
Ctrl MO NO	No Overlap	h3b3	8.808	794.142	43.434	2147.627	14.231
Ctrl MO NO	No Overlap	h3b3	8.808	911.827	69.441	2981.871	14.231
Ctrl MO NO	No Overlap	h3b3	8.808	1154.229	212.494	4095	14.231
Ctrl MO NO	No Overlap	h3b3	8.808	1292.133	258.784	4095	14.231
Ctrl MO NO	No Overlap	h3b3	8.808	1394.519	301.029	4095	14.231
Ctrl MO NO	No Overlap	h3b3	8.808	1453.571	232.795	4095	14.231
Ctrl MO NO	No Overlap	h3b3	8.808	1256.352	155.48	4064.854	14.231
Ctrl MO NO	No Overlap	h5b1	9.942	1340.725	54.842	4095	16.078
Ctrl MO NO	No Overlap	h5b1	9.942	1384.683	46.835	4095	16.078
Ctrl MO NO	No Overlap	h5b1	9.942	1355.146	93.637	4095	16.078
Ctrl MO NO	No Overlap	h5b1	9.942	1326.614	128.163	4095	16.078
Ctrl MO NO	No Overlap	h5b1	9.942	1327.129	157.295	4095	16.078
Ctrl MO NO	No Overlap	h5b1	9.78	1696.823	285.785	4095	15.814
Ctrl MO NO	No Overlap	h5b1	9.78	1260.149	207.165	4095	15.814
Ctrl MO NO	No Overlap	h5b1	9.78	933.22	89.573	4095	15.814
Ctrl MO NO	No Overlap	h5b1	9.78	778.944	36.097	4033.259	15.814
Ctrl MO NO	No Overlap	h5b1	9.78	671.886	15.144	4094.542	15.814
Ctrl MO NO	No Overlap
Ctrl MO NO	No Overlap	h5b2	7.295	503.184	33.825	3629.198	11.773
Ctrl MO NO	No Overlap	h5b2	7.295	763.526	37.73	4095	11.773
Ctrl MO NO	No Overlap	h5b2	7.295	534.89	32.11	4095	11.773
Ctrl MO NO	No Overlap	h5b2	7.295	484.252	37.487	3983.327	11.773
Ctrl MO NO	No Overlap	h5b2	7.241	1091.89	70.157	4095	11.685
Ctrl MO NO	No Overlap	h5b2	7.241	1066.922	26.565	4095	11.685
Ctrl MO NO	No Overlap	h5b2	7.241	931.571	132.38	4095	11.685
Ctrl MO NO	No Overlap	h5b2	7.241	954.111	81.762	4086.935	11.685
Ctrl MO NO	No Overlap	h5b2	7.241	922.472	157.023	4095	11.685
Ctrl MO NO	No Overlap
Ctrl MO NO	No Overlap	h5b3	9.888	1602.378	74.076	4095	15.99
Ctrl MO NO	No Overlap	h5b3	9.888	1563.148	63.753	4095	15.99
Ctrl MO NO	No Overlap	h5b3	9.888	1585.133	94.617	4095	15.99
Ctrl MO NO	No Overlap	h5b3	9.888	1674.329	100.05	4095	15.99
Ctrl MO NO	No Overlap	h5b3	9.888	1610.023	53.298	4095	15.99
Ctrl MO NO	No Overlap	h5b3	9.888	1120.905	109.202	4095	15.99
Ctrl MO NO	No Overlap	h5b3	9.888	840.097	77.175	4083.99	15.99
Ctrl MO NO	No Overlap	h5b3	9.888	756.41	87.241	4086.542	15.99
Ctrl MO NO	No Overlap	h5b3	9.888	820.155	106.151	3896.078	15.99
Ctrl MO NO	No Overlap	h5b3	9.888	1007.991	177.474	3823.485	15.99
Ctrl MO NO	No Overlap
Ctrl MO NO	No Overlap	h5b4	9.618	1370.866	82.609	3891.86	15.504
Ctrl MO NO	No Overlap	h5b4	9.618	1231.481	112.102	4095	15.504
Ctrl MO NO	No Overlap	h5b4	9.618	1046.347	45.634	4095	15.504
Ctrl MO NO	No Overlap	h5b4	9.618	961.472	68.155	4095	15.504
Ctrl MO NO	No Overlap	h5b4	9.618	860.938	85.716	4078.2	15.504
Ctrl MO NO	No Overlap	h5b4	9.618	623.451	96.162	2592.578	15.504
Ctrl MO NO	No Overlap	h5b4	9.618	979.688	202.171	3520.438	15.504
Ctrl MO NO	No Overlap	h5b4	9.618	1206.992	147.02	3848.562	15.504
Ctrl MO NO	No Overlap
Ctrl MO NO	No Overlap	h5b5	10.266	482.055	10.8	1647.07	16.605
Ctrl MO NO	No Overlap	h5b5	10.266	1086.056	11.749	3936.474	16.605
Ctrl MO NO	No Overlap	h5b5	10.266	1234.07	24.043	4095	16.605
Ctrl MO NO	No Overlap	h5b5	10.266	1251.972	35.178	4095	16.605
Ctrl MO NO	No Overlap	h5b5	10.266	1307.783	66.85	4095	16.605
Ctrl MO NO	No Overlap	h5b5	10.266	1499.648	137.766	4095	16.605
Ctrl MO NO	No Overlap	h5b5	9.942	2119.573	271.557	4095	16.078
Ctrl MO NO	No Overlap	h5b5	9.942	1847.551	159.499	4095	16.078
Ctrl MO NO	No Overlap	h5b5	9.942	1590.589	177.852	4095	16.078
Ctrl MO NO	No Overlap	h5b5	9.942	1554.621	163.045	4095	16.078
Ctrl MO NO	No Overlap	h5b5	9.942	1539.458	70.425	4095	16.078
Ctrl MO NO	No Overlap	h5b5	9.942	1333.832	36.067	4094.955	16.078
Ctrl MO NO	No Overlap	h5b5	9.942	1102.927	24.825	4093.817	16.078
Ctrl MO NO	No Overlap
Ctrl MO NO	No Overlap	h5b6	4.593	619.088	17.932	3839.639	7.38
Ctrl MO NO	No Overlap	h5b6	4.593	1009.683	19.778	4095	7.38
Ctrl MO NO	No Overlap	h5b6	4.593	1098.016	60.818	4095	7.38
Ctrl MO NO	No Overlap	h5b6	4.593	1221.445	56.326	4095	7.38
Ctrl MO NO	No Overlap	h5b6	4.593	1227.365	164.266	4095	7.38
Ctrl MO NO	No Overlap	h5b6	5.62	1502.599	356.76	4095	9.049
Ctrl MO NO	No Overlap	h5b6	5.62	1983.726	326.954	4095	9.049
Ctrl MO NO	No Overlap	h5b6	5.62	2323.152	458.264	4095	9.049
Ctrl MO NO	No Overlap	h5b6	5.62	2183.452	287.799	4095	9.049
Ctrl MO NO	No Overlap	h5b6	5.62	1772	116.399	4095	9.049
Ctrl MO NO	No Overlap	h6b1	9.456	460.373	15.403	2220.992	15.287
Ctrl MO NO	No Overlap	h6b1	9.456	740.208	54.779	3384.554	15.287
Ctrl MO NO	No Overlap	h6b1	9.456	906.281	72.559	4077.59	15.287
Ctrl MO NO	No Overlap	h6b1	9.456	1076.118	91.213	4081.986	15.287
Ctrl MO NO	No Overlap	h6b1	9.456	1212.482	108.425	4090.027	15.287
Ctrl MO NO	No Overlap	h6b1	9.456	1169.14	134.131	4095	15.287
Ctrl MO NO	No Overlap	h6b1	9.456	1132.958	137.874	4095	15.287
Ctrl MO NO	No Overlap	h6b1	9.456	1075.298	134.902	4095	15.287
Ctrl MO NO	No Overlap
Ctrl MO NO	No Overlap	h6b2	12.482	880.261	32.278	3940.032	20.208
Ctrl MO NO	No Overlap	h6b2	12.482	1049.273	42.019	4095	20.208
Ctrl MO NO	No Overlap	h6b2	12.482	971.47	71.269	4095	20.208
Ctrl MO NO	No Overlap	h6b2	12.482	930.668	79.141	4095	20.208
Ctrl MO NO	No Overlap	h6b2	12.482	1096.308	112.091	4095	20.208
Ctrl MO NO	No Overlap	h6b2	12.482	1253.136	87.94	4095	20.208
Ctrl MO NO	No Overlap	h6b2	12.482	1256.851	116.348	4095	20.208
Ctrl MO NO	No Overlap	h6b2	12.482	1177.095	137.755	4095	20.208
Ctrl MO NO	No Overlap	h6b2	12.482	967.823	104.078	4089.056	20.208
Ctrl MO NO	No Overlap
Ctrl MO NO	No Overlap	h6b3	8.159	916.921	22.292	4095	13.144
Ctrl MO NO	No Overlap	h6b3	8.159	930.495	30.704	4095	13.144
Ctrl MO NO	No Overlap	h6b3	8.159	853.854	46.491	4095	13.144
Ctrl MO NO	No Overlap	h6b3	8.159	885.438	152.356	4089.882	13.144
Ctrl MO NO	No Overlap	h6b3	8.159	1065.632	102.425	3691.598	13.144
Ctrl MO NO	No Overlap	h6b3	8.159	1158.057	89.368	3711.557	13.144
Ctrl MO NO	No Overlap	h6b3	8.159	1253.389	150.815	4065.956	13.144
Ctrl MO NO	No Overlap	h6b3	8.159	1308.094	144.403	4095	13.144
Ctrl MO NO	No Overlap
Ctrl MO NO	No Overlap	h6b4	7.619	616.239	1.631	1958.78	12.3
Ctrl MO NO	No Overlap	h6b4	7.619	1030.377	2.786	3698.875	12.3
Ctrl MO NO	No Overlap	h6b4	7.619	947.857	1.321	3271.658	12.3
Ctrl MO NO	No Overlap	h6b4	7.619	576.43	5.645	2702.674	12.3
Ctrl MO NO	No Overlap	h6b4	7.619	421.962	31.738	2486.506	12.3
Ctrl MO NO	No Overlap	h6b4	7.619	478.357	63.114	3327.018	12.3
Ctrl MO NO	No Overlap	h6b4	8.429	1077.458	136.269	4095	13.618
Ctrl MO NO	No Overlap	h6b4	8.429	1145.284	93.815	4086.737	13.618
Ctrl MO NO	No Overlap	h6b4	8.429	1029.125	155.573	3781.241	13.618
Ctrl MO NO	No Overlap	h6b4	8.429	878.89	166.564	4084.38	13.618
Ctrl MO NO	No Overlap	h6b4	8.429	809.299	60.476	3614.698	13.618
Ctrl MO NO	No Overlap	h7b2	9.78	839.308	36.24	3062.049	15.803
Ctrl MO NO	No Overlap	h7b2	9.78	1205.599	88.947	4095	15.803
Ctrl MO NO	No Overlap	h7b2	9.78	1283.327	107.679	4095	15.803
Ctrl MO NO	No Overlap	h7b2	9.78	1519.469	184.276	4095	15.803
Ctrl MO NO	No Overlap	h7b2	9.78	1445.913	155.217	4095	15.803
Ctrl MO NO	No Overlap	h7b2	9.78	1278.721	138.73	4095	15.803
Ctrl MO NO	No Overlap	h7b2	9.78	1091.774	101.469	4095	15.803
Ctrl MO NO	No Overlap	h7b2	9.78	839.896	35.031	4095	15.803
Ctrl MO NO	No Overlap	h7b2	9.78	620.175	16.368	4095	15.803
Ctrl MO NO	No Overlap
Ctrl MO NO	No Overlap	h7b3	12.59	556.648	15.535	4095	20.383
Ctrl MO NO	No Overlap	h7b3	12.59	687.511	17.123	4095	20.383
Ctrl MO NO	No Overlap	h7b3	12.59	837.016	72.386	4095	20.383
Ctrl MO NO	No Overlap	h7b3	12.59	983.97	84.774	3840.469	20.383
Ctrl MO NO	No Overlap	h7b3	12.59	1173.92	93.202	4065.246	20.383
Ctrl MO NO	No Overlap	h7b3	12.59	1257.75	67.69	4094.556	20.383
Ctrl MO NO	No Overlap	h7b3	12.59	984.889	128.305	4095	20.383
Ctrl MO NO	No Overlap
Ctrl MO NO	No Overlap	h7b4	9.024	654.952	26.459	2221.448	14.585
Ctrl MO NO	No Overlap	h7b4	9.024	960.995	55.973	3840.34	14.585
Ctrl MO NO	No Overlap	h7b4	9.024	1012.862	89.207	4095	14.585
Ctrl MO NO	No Overlap	h7b4	9.024	1100.65	67.311	4095	14.585
Ctrl MO NO	No Overlap	h7b4	9.024	1183.671	65.216	4067.155	14.585
Ctrl MO NO	No Overlap	h7b4	9.024	1130.063	53.112	4095	14.585
Ctrl MO NO	No Overlap	h7b4	9.024	929.062	26.233	4035.217	14.585
Ctrl MO NO	No Overlap
Ctrl MO NO	No Overlap	h7b5	9.888	427.083	7.418	1227.184	15.99
Ctrl MO NO	No Overlap	h7b5	9.888	853.39	10.595	2562.958	15.99
Ctrl MO NO	No Overlap	h7b5	9.888	997.011	53.243	4095	15.99
Ctrl MO NO	No Overlap	h7b5	9.888	927.701	114.245	4095	15.99
Ctrl MO NO	No Overlap	h7b5	9.888	966.613	71.43	4095	15.99
Ctrl MO NO	No Overlap	h7b5	9.888	1029.685	87.722	4095	15.99
Ctrl MO NO	No Overlap	h7b5	9.888	1176.901	104.635	4095	15.99
Ctrl MO NO	No Overlap	h7b5	9.888	1230.839	130.391	4095	15.99
Ctrl MO NO	No Overlap	h7b5	9.888	965.05	94.495	3923.423	15.99
Ctrl MO NO	No Overlap
Ctrl MO NO	No Overlap	h7b6	9.024	796.026	48.401	3974.427	14.585
Ctrl MO NO	No Overlap	h7b6	9.024	816.378	101.76	4095	14.585
Ctrl MO NO	No Overlap	h7b6	9.024	779.255	111.171	4075.689	14.585
Ctrl MO NO	No Overlap	h7b6	9.024	888.177	116.166	4040.896	14.585
Ctrl MO NO	No Overlap	h7b6	9.024	1098.238	103.072	4095	14.585
Ctrl MO NO	No Overlap	h7b6	9.024	1442.674	139.734	4095	14.585
Ctrl MO NO	No Overlap	h7b6	9.024	1494.736	112.093	4095	14.585
Ctrl MO NO	No Overlap	h7b6	9.024	1050.776	147.652	4095	14.585
Ctrl MO NO	No Overlap	h7b6	9.024	792.207	111.456	4095	14.585
Ctrl MO NO	No Overlap
Ctrl MO NO	No Overlap	h7b7	7.187	725.728	51.135	3910.816	11.597
Ctrl MO NO	No Overlap	h7b7	7.187	855.292	54.691	4095	11.597
Ctrl MO NO	No Overlap	h7b7	7.187	866.445	148.99	4095	11.597
Ctrl MO NO	No Overlap	h7b7	7.187	920.661	170.51	4095	11.597
Ctrl MO NO	No Overlap	h7b7	7.187	1010.863	88.272	4095	11.597
Ctrl MO NO	No Overlap	h7b7	7.187	1198.367	180.854	4095	11.597
Ctrl MO NO	No Overlap	h7b7	7.187	1448.59	316.5	4093.419	11.597
Ctrl MO NO	No Overlap	h7b7	7.187	1356.213	287.353	3633.534	11.597
Ctrl MO NO	No Overlap
Ctrl MO NO	No Overlap	h7b8	9.726	650.25	6.589	4095	15.727
Ctrl MO NO	No Overlap	h7b8	9.726	701.755	23.539	4095	15.727
Ctrl MO NO	No Overlap	h7b8	9.726	794.635	32.317	4095	15.727
Ctrl MO NO	No Overlap	h7b8	11.293	1041.839	102.568	4095	18.275
Ctrl MO NO	No Overlap	h7b8	11.293	1332.754	123.054	4095	18.275
Ctrl MO NO	No Overlap	h7b8	11.293	1487.473	133.893	4095	18.275
Ctrl MO NO	No Overlap	h7b8	11.293	1185.573	131.757	4095	18.275
Ctrl MO NO	No Overlap	h7b8	11.293	883.782	56.042	4095	18.275
Ctrl MO NO	No Overlap	h8b1	5.674	1993.651	342.232	4095	9.137
Ctrl MO NO	No Overlap	h8b1	5.674	1973.467	295.121	4095	9.137
Ctrl MO NO	No Overlap	h8b1	5.674	1986.606	245.081	4095	9.137
Ctrl MO NO	No Overlap	h8b1	5.674	1850.154	297.95	4095	9.137
Ctrl MO NO	No Overlap	h8b1	5.674	1575.192	56.025	4075.603	9.137
Ctrl MO NO	No Overlap	h8b1	5.674	1184.113	47.305	3891.514	9.137
Ctrl MO NO	No Overlap
Ctrl MO NO	No Overlap	h8b2	7.511	1070.899	44.143	3337.903	12.125
Ctrl MO NO	No Overlap	h8b2	7.511	863.98	126.857	4095	12.125
Ctrl MO NO	No Overlap	h8b2	7.511	2161.057	156.919	4095	12.124
Ctrl MO NO	No Overlap	h8b2	7.511	2290.298	174.64	4095	12.124
Ctrl MO NO	No Overlap	h8b2	7.511	2285.661	198.151	4095	12.124
Ctrl MO NO	No Overlap	h8b2	7.511	1852.292	267.139	4095	12.124
Ctrl MO NO	No Overlap	h8b2	7.511	1325.737	165.486	4095	12.124
Ctrl MO NO	No Overlap
Ctrl MO NO	No Overlap	h8b3	11.725	1284.307	86.519	3981.5	18.977
Ctrl MO NO	No Overlap	h8b3	11.725	1323.156	56.409	3916.681	18.977
Ctrl MO NO	No Overlap	h8b3	11.725	1577.801	162.846	4095	18.977
Ctrl MO NO	No Overlap	h8b3	11.725	1720.428	195.807	4095	18.977
Ctrl MO NO	No Overlap	h8b3	11.725	1868.979	218.242	4095	18.977
Ctrl MO NO	No Overlap	h8b3	11.725	1861.571	289.379	4095	18.977
Ctrl MO NO	No Overlap	h8b3	11.725	1265.394	248.395	4095	18.977
Ctrl MO NO	No Overlap
Ctrl MO NO	No Overlap	h8b4	11.131	1087.08	23.571	4095	18.005
Ctrl MO NO	No Overlap	h8b4	11.131	1135.243	32.901	4095	18.005
Ctrl MO NO	No Overlap	h8b4	11.131	973.681	124.632	4095	18.005
Ctrl MO NO	No Overlap	h8b4	11.131	1065.033	124.917	4095	18.005
Ctrl MO NO	No Overlap	h8b4	11.131	1220.715	152.015	4095	18.005
Ctrl MO NO	No Overlap	h8b4	11.131	1370.271	214.765	4095	18.005
Ctrl MO NO	No Overlap	h8b4	11.131	1392.345	133.955	4095	18.005
Ctrl MO NO	No Overlap	h8b4	11.131	1068.468	158.065	4067.374	18.005
Ctrl MO NO	No Overlap
Ctrl MO NO	No Overlap	h8b5	9.24	561.874	23.705	3094.961	14.936
Ctrl MO NO	No Overlap	h8b5	9.24	701.64	17.35	4019.229	14.936
Ctrl MO NO	No Overlap	h8b5	9.24	843.318	46.359	4095	14.936
Ctrl MO NO	No Overlap	h8b5	9.24	891.376	79.049	4095	14.936
Ctrl MO NO	No Overlap	h8b5	9.24	890.035	133.7	4095	14.936
Ctrl MO NO	No Overlap	h8b5	9.24	975.953	98.716	4095	14.936
Ctrl MO NO	No Overlap	h8b5	9.24	1183.74	189.241	4095	14.936
Ctrl MO NO	No Overlap	h8b5	9.24	1426.994	245.118	4095	14.936
Ctrl MO NO	No Overlap	h8b5	9.24	1422.953	152.223	4095	14.936
Ctrl MO NO	No Overlap
Ctrl MO NO	No Overlap	h8b6	6.862	849.454	66.271	2942.667	11.07
Ctrl MO NO	No Overlap	h8b6	6.862	1065.707	73.288	3629.562	11.07
Ctrl MO NO	No Overlap	h8b6	6.862	1093.129	108.274	3844.658	11.07
Ctrl MO NO	No Overlap	h8b6	6.862	1114.929	151.395	4095	11.07
Ctrl MO NO	No Overlap	h8b6	6.862	1163.546	111.505	4095	11.07
Ctrl MO NO	No Overlap	h8b6	6.862	1237.024	169.448	4095	11.07
Ctrl MO NO	No Overlap	h8b6	6.862	1381.214	163.288	4095	11.07
Ctrl MO NO	No Overlap	h8b6	6.862	1285.862	132.117	3983.304	11.07
Ctrl MO NO	No Overlap	h8b6	6.862	1010.743	154.547	3782.156	11.07
Ctrl MO NO	No Overlap
Ctrl MO NO	No Overlap	h8b7	10.158	689.606	39.108	3231.37	16.43
Ctrl MO NO	No Overlap	h8b7	10.158	862.243	39.717	3147.872	16.43
Ctrl MO NO	No Overlap	h8b7	10.158	917.673	67.066	3112.817	16.43
Ctrl MO NO	No Overlap	h8b7	10.158	1039.756	135.891	3635.144	16.43
Ctrl MO NO	No Overlap	h8b7	10.158	1099.821	118.365	3874.021	16.43
Ctrl MO NO	No Overlap	h8b7	10.158	1177.056	176.333	4095	16.43
Ctrl MO NO	No Overlap	h8b7	10.158	1369.372	194.806	4095	16.43
Ctrl MO NO	No Overlap	h8b7	10.158	1584.07	155.25	4095	16.43
Ctrl MO NO	No Overlap
Ctrl MO NO	No Overlap	h8h8	6.808	916.579	22.284	2646.053	10.982
Ctrl MO NO	No Overlap	h8h8	6.808	1325.063	23.092	3916.821	10.982
Ctrl MO NO	No Overlap	h8h8	6.808	1607.778	58.314	4095	10.982
Ctrl MO NO	No Overlap	h8h8	6.808	1442.351	22.573	4095	10.982
Ctrl MO NO	No Overlap	h8h8	6.808	1318.543	147.13	4095	10.982
Ctrl MO NO	No Overlap	h8h8	6.808	1263.238	117.849	4095	10.982
Ctrl MO NO	No Overlap	h8h8	6.808	1152.803	226.257	4052.038	10.982
Ctrl MO NO	No Overlap	h8h8	6.808	1071.252	189.732	3873.263	10.982
Ctrl MO NO	No Overlap	h8h8	6.808	1222.269	230.972	4095	10.982
Ctrl MO NO	No Overlap	h8h8	6.808	1139.391	153.671	4040.771	10.982
Ctrl MO NO	No Overlap
Ctrl MO NO	No Overlap	h8b9	5.241	1036.155	24.846	3172.174	8.434
Ctrl MO NO	No Overlap	h8b9	5.241	1312.688	51.469	4095	8.434
Ctrl MO NO	No Overlap	h8b9	5.241	1192.602	39.088	3958.952	8.434
Ctrl MO NO	No Overlap	h8b9	5.241	1310.124	55.93	4066.742	8.434
Ctrl MO NO	No Overlap	h8b9	5.241	1442.453	75.523	4095	8.434
Ctrl MO NO	No Overlap	h8b9	5.241	1490.035	87.28	4067.261	8.434
Ctrl MO NO	No Overlap	h8b9	5.241	1562.403	147.064	4095	8.434
Ctrl MO NO	No Overlap	h8b9	5.241	1816.273	249.957	4095	8.434
Ctrl MO NO	No Overlap	h8b9	5.241	1639.441	213	4095	8.434
Ctrl MO NO	No Overlap	h8b9	5.241	1431.857	174.513	4095	8.434
Ecad MO CO	Complete Overlap	h1b1	7.349	696.446	0.254	2832.661	11.861
Ecad MO CO	Complete Overlap	h1b1	7.349	835.245	12.199	4082.625	11.861
Ecad MO CO	Complete Overlap	h1b1	7.349	793.724	4.964	4094.165	11.861
Ecad MO CO	Complete Overlap	h1b1	7.349	809.265	24.132	4095	11.861
Ecad MO CO	Complete Overlap	h1b1	7.349	845.017	47.776	4095	11.861
Ecad MO CO	Complete Overlap	h1b1	11.077	927.716	10.579	4095	17.923
Ecad MO CO	Complete Overlap	h1b1	11.077	814.771	29.964	4095	17.923
Ecad MO CO	Complete Overlap	h1b1	11.077	775.389	29.648	3982.409	17.923
Ecad MO CO	Complete Overlap	h1b1	10.915	1040.018	117.562	4051.917	17.66
Ecad MO CO	Complete Overlap	h1b1	10.915	946.037	121.279	4005.758	17.66
Ecad MO CO	Complete Overlap	h1b1	10.915	797.283	57.948	2875.948	17.66
Ecad MO CO	Complete Overlap	h1b1	10.915	763.167	53.452	3395.436	17.66
Ecad MO CO	Complete Overlap	h1b1	10.915	733.987	37.637	3190.288	17.66
Ecad MO CO	Complete Overlap	h1b1	10.915	740.967	30.365	3928.539	17.66
Ecad MO CO	Complete Overlap
Ecad MO CO	Complete Overlap	h1b2	9.888	412.195	8.032	1798.332	15.99
Ecad MO CO	Complete Overlap	h1b2	9.888	783.143	5.52	3483.844	15.99
Ecad MO CO	Complete Overlap	h1b2	9.888	837.273	28.996	4095	15.99
Ecad MO CO	Complete Overlap	h1b2	9.888	771.642	57.431	4066.69	15.99
Ecad MO CO	Complete Overlap	h1b2	9.888	752.043	54.362	3522.541	15.99
Ecad MO CO	Complete Overlap	h1b2	9.888	1112.45	129.934	3344.659	15.99
Ecad MO CO	Complete Overlap	h1b2	9.888	1168.709	167.899	4095	15.99
Ecad MO CO	Complete Overlap	h1b2	9.888	1156.692	128.053	4095	15.99
Ecad MO CO	Complete Overlap	h1b2	9.888	1258.968	156.452	4094.99	15.99
Ecad MO CO	Complete Overlap	h1b2	9.888	1462.253	185.474	4095	15.99
Ecad MO CO	Complete Overlap	h1b2	9.888	1503.72	140.069	4095	15.99
Ecad MO CO	Complete Overlap	h1b2	9.888	1148.975	86.464	4095	15.99
Ecad MO CO	Complete Overlap	h1b2	9.888	915.303	92.201	4074.671	15.99
Ecad MO CO	Complete Overlap
Ecad MO CO	Complete Overlap	h1b3	11.509	341.845	3.503	1727.781	18.625
Ecad MO CO	Complete Overlap	h1b3	11.509	725.793	11.696	3212.981	18.625
Ecad MO CO	Complete Overlap	h1b3	11.509	850.512	8.601	4095	18.625
Ecad MO CO	Complete Overlap	h1b3	11.509	754.068	15.876	4095	18.625
Ecad MO CO	Complete Overlap	h1b3	11.509	681.458	17.43	4095	18.625
Ecad MO CO	Complete Overlap	h1b3	11.509	615.817	35.771	4095	18.625
Ecad MO CO	Complete Overlap	h1b3	11.509	690.316	31.99	4095	18.625
Ecad MO CO	Complete Overlap	h1b3	11.347	980.355	32.026	4095	18.362
Ecad MO CO	Complete Overlap	h1b3	11.347	987.069	29.623	4095	18.362
Ecad MO CO	Complete Overlap	h1b3	11.347	928.864	73.755	4093.772	18.362
Ecad MO CO	Complete Overlap	h1b3	11.347	854.99	56.003	4055.562	18.362
Ecad MO CO	Complete Overlap	h1b3	11.347	693.37	31.95	4095	18.362
Ecad MO CO	Complete Overlap	h1b3	11.347	640.841	31.446	4095	18.362
Ecad MO CO	Complete Overlap	h1b3	11.347	568.495	11.534	4095	18.362
Ecad MO CO	Complete Overlap	h2b1	16.48	980.871	22.867	4087.979	26.708
Ecad MO CO	Complete Overlap	h2b1	16.48	1205.097	90.088	4095	26.708
Ecad MO CO	Complete Overlap	h2b1	16.48	1387.461	138.533	4095	26.708
Ecad MO CO	Complete Overlap	h2b1	16.48	1209.933	145.796	4095	26.708
Ecad MO CO	Complete Overlap	h2b1	16.48	958.696	99.16	4095	26.708
Ecad MO CO	Complete Overlap
Ecad MO CO	Complete Overlap	h2b2	8.105	1095.654	80.594	3084.124	13.091
Ecad MO CO	Complete Overlap	h2b2	8.105	1181.443	167.589	4095	13.091
Ecad MO CO	Complete Overlap	h2b2	8.105	1186.211	108.822	4095	13.091
Ecad MO CO	Complete Overlap	h2b2	8.105	1028.96	126.248	4095	13.091
Ecad MO CO	Complete Overlap	h2b2	8.105	945.303	59.93	4095	13.091
Ecad MO CO	Complete Overlap
Ecad MO CO	Complete Overlap	h2b3	10.104	773.599	49.551	2479.893	16.342
Ecad MO CO	Complete Overlap	h2b3	10.104	838.302	100.159	4095	16.342
Ecad MO CO	Complete Overlap	h2b3	10.104	1133.675	88.424	4095	16.342
Ecad MO CO	Complete Overlap	h2b3	10.104	1148.36	44.088	4095	16.342
Ecad MO CO	Complete Overlap	h2b3	10.104	940.758	69.827	4095	16.342
Ecad MO CO	Complete Overlap	h2b3	10.104	632.881	87.936	4095	16.342
Ecad MO CO	Complete Overlap	h2b3	10.104	405.246	29.79	3200.789	16.342
Ecad MO CO	Complete Overlap	h2b3	10.104	363.68	17.635	4095	16.342
Ecad MO CO	Complete Overlap
Ecad MO CO	Complete Overlap	h2b4	10.969	605.425	26.784	2104.555	17.747
Ecad MO CO	Complete Overlap	h2b4	10.969	819.719	2.972	3470.645	17.747
Ecad MO CO	Complete Overlap	h2b4	10.969	720.539	7.773	4084.221	17.747
Ecad MO CO	Complete Overlap	h2b4	10.969	514.93	0.839	4095	17.747
Ecad MO CO	Complete Overlap	h2b4	10.969	442.857	1.852	4093.379	17.747
Ecad MO CO	Complete Overlap
Ecad MO CO	Complete Overlap	h2b5	10.861	790.18	28.992	3472.515	17.572
Ecad MO CO	Complete Overlap	h2b5	10.861	1026.542	65.308	4095	17.572
Ecad MO CO	Complete Overlap	h2b5	10.861	1082.426	65.039	4095	17.572
Ecad MO CO	Complete Overlap	h2b5	10.861	1002.952	46.093	4095	17.572
Ecad MO CO	Complete Overlap	h2b5	10.861	884.934	73.602	4095	17.572
Ecad MO CO	Complete Overlap	h2b5	10.969	941.209	70.516	4095	17.747
Ecad MO CO	Complete Overlap	h2b5	10.969	666.397	55.776	4095	17.747
Ecad MO CO	Complete Overlap
Ecad MO CO	Complete Overlap	h2b6	5.511	816.673	79.729	3484.271	8.874
Ecad MO CO	Complete Overlap	h2b6	5.511	1364.7	155.253	4095	8.874
Ecad MO CO	Complete Overlap	h2b6	5.511	1603.026	269.99	4095	8.874
Ecad MO CO	Complete Overlap	h2b6	5.511	1472.43	301.119	4095	8.874
Ecad MO CO	Complete Overlap	h2b6	5.511	1229.36	202.535	4095	8.874
Ecad MO CO	Complete Overlap	h2b6	5.511	864.911	128.342	4094.646	8.874
Ecad MO CO	Complete Overlap	h3b1	6.322	1026.082	111.65	4091.633	10.191
Ecad MO CO	Complete Overlap	h3b1	6.322	1059.889	126.55	4033.914	10.191
Ecad MO CO	Complete Overlap	h3b1	6.322	686.728	96.072	3363.054	10.191
Ecad MO CO	Complete Overlap	h3b1	6.322	560.807	67.958	3928.766	10.191
Ecad MO CO	Complete Overlap	h3b1	6.484	950.704	124.388	3960.368	10.454
Ecad MO CO	Complete Overlap	h3b1	6.484	1103.904	94.358	4095	10.454
Ecad MO CO	Complete Overlap	h3b1	6.484	1131.893	80.003	4092.537	10.454
Ecad MO CO	Complete Overlap	h3b1	6.322	1559.439	205.589	4095	10.191
Ecad MO CO	Complete Overlap	h3b1	6.322	1143.031	169.676	3826.172	10.191
Ecad MO CO	Complete Overlap	h3b1	6.322	724.988	104.171	2030.474	10.191
Ecad MO CO	Complete Overlap	h3b1	6.322	412.685	38.63	2151.559	10.191
Ecad MO CO	Complete Overlap
Ecad MO CO	Complete Overlap	h3b2	9.618	1036.015	182.653	4069.239	15.551
Ecad MO CO	Complete Overlap	h3b2	9.618	935.885	168.126	2894.291	15.551
Ecad MO CO	Complete Overlap	h3b2	9.618	844.204	122.646	3943.062	15.551
Ecad MO CO	Complete Overlap	h3b2	9.402	980.084	62.767	3388.809	15.2
Ecad MO CO	Complete Overlap	h3b2	9.402	1062.198	115.937	4090.662	15.2
Ecad MO CO	Complete Overlap	h3b2	9.402	975.882	90.38	4095	15.2
Ecad MO CO	Complete Overlap	h3b2	9.402	848.149	27.71	4093.567	15.2
Ecad MO CO	Complete Overlap
Ecad MO CO	Complete Overlap	h3b3	6.754	737.779	83.21	3717.22	10.894
Ecad MO CO	Complete Overlap	h3b3	6.754	714.516	99.192	4095	10.894
Ecad MO CO	Complete Overlap	h3b3	6.754	652.902	67.022	4095	10.894
Ecad MO CO	Complete Overlap	h3b3	6.754	682.545	48.547	3727.063	10.894
Ecad MO CO	Complete Overlap	h3b3	6.592	1120.815	52.317	3983.947	10.631
Ecad MO CO	Complete Overlap	h3b3	6.592	1035.615	12.945	3589.864	10.631
Ecad MO CO	Complete Overlap	h3b3	6.592	576.759	72.414	3318.746	10.631
Ecad MO CO	Complete Overlap	h3b3	6.592	470.972	63.609	3211.7	10.631
Ecad MO CO	Complete Overlap
Ecad MO CO	Complete Overlap	h3b4	6.916	1165.796	317.983	3739.559	11.158
Ecad MO CO	Complete Overlap	h3b4	6.916	1305.219	261.011	3937.111	11.158
Ecad MO CO	Complete Overlap	h3b4	6.916	1449.828	319.826	4015.298	11.158
Ecad MO CO	Complete Overlap	h3b4	6.916	1559.075	161.02	4067.748	11.158
Ecad MO CO	Complete Overlap	h3b4	6.916	1409.974	78.748	3899.839	11.158
Ecad MO CO	Complete Overlap	h3b4	6.916	1361.293	35.706	4095	11.158
Ecad MO CO	Complete Overlap	h3b4	6.916	1297.014	61.094	4095	11.158
Ecad MO CO	Complete Overlap
Ecad MO CO	Complete Overlap	h3b5	7.673	1117.992	69.551	4095	12.388
Ecad MO CO	Complete Overlap	h3b5	7.673	1223.907	169.388	4095	12.388
Ecad MO CO	Complete Overlap	h3b5	7.673	1240.746	137.065	4095	12.388
Ecad MO CO	Complete Overlap	h3b5	7.673	1151.125	96.914	4095	12.388
Ecad MO CO	Complete Overlap	h3b5	7.673	941.377	107.983	4030.13	12.388
Ecad MO CO	Complete Overlap	h3b5	7.673	848.479	62.524	3958.473	12.388
Ecad MO CO	Complete Overlap	h3b5	7.673	828.291	55.385	4095	12.388
Ecad MO CO	Complete Overlap
Ecad MO CO	Complete Overlap	h3b6	9.24	1162.589	132.996	4064.656	14.936
Ecad MO CO	Complete Overlap	h3b6	9.24	1256.048	205.724	4095	14.936
Ecad MO CO	Complete Overlap	h3b6	9.24	1116.83	166.381	4095	14.936
Ecad MO CO	Complete Overlap	h3b6	9.24	899.035	115.657	3897.661	14.936
Ecad MO CO	Complete Overlap	h3b6	9.78	1024.162	83.405	3532.729	15.815
Ecad MO CO	Complete Overlap	h3b6	9.78	944.967	83.989	4095	15.815
Ecad MO CO	Complete Overlap	h3b6	10.104	1328.897	166.732	4095	16.342
Ecad MO CO	Complete Overlap	h3b6	10.104	1308.501	139.51	4095	16.342
Ecad MO CO	Complete Overlap	h3b6	10.104	1165.528	55.647	4095	16.342
Ecad MO CO	Complete Overlap
Ecad MO CO	Complete Overlap	h3b7	9.402	1262.664	159.407	4095	15.199
Ecad MO CO	Complete Overlap	h3b7	9.402	1209.644	94.137	4095	15.199
Ecad MO CO	Complete Overlap	h3b7	9.402	1021.783	89.701	4094.008	15.199
Ecad MO CO	Complete Overlap	h3b7	9.402	802.051	64.539	4060.262	15.199
Ecad MO CO	Complete Overlap	h3b7	9.402	598.564	32.994	2982.81	15.199
Ecad MO CO	Complete Overlap	h3b7	9.402	507.344	60.596	4090.951	15.199
Ecad MO CO	Complete Overlap
Ecad MO CO	Complete Overlap	h3b8	16.859	1097.123	34.627	4095	27.324
Ecad MO CO	Complete Overlap	h3b8	16.859	1126.67	51.049	4095	27.324
Ecad MO CO	Complete Overlap	h3b8	16.859	1085.187	12.149	4095	27.324
Ecad MO CO	Complete Overlap	h3b8	16.859	926.965	40.099	4095	27.324
Ecad MO CO	Complete Overlap	h3b8	16.859	739.975	40.378	4051.518	27.324
Ecad MO CO	Complete Overlap	h3b8	16.318	1339.675	125.856	4095	26.445
Ecad MO CO	Complete Overlap	h3b8	16.318	1133.344	122.397	4095	26.445
Ecad MO CO	Complete Overlap	h3b8	16.318	894.989	120.933	4095	26.445
Ecad MO CO	Complete Overlap	h3b8	16.318	801.887	112.033	4095	26.445
Ecad MO CO	Complete Overlap
Ecad MO CO	Complete Overlap	h3b9	6.592	1018.357	62.856	3823.106	10.631
Ecad MO CO	Complete Overlap	h3b9	6.592	857.595	73.635	3036.921	10.631
Ecad MO CO	Complete Overlap	h3b9	6.592	716.714	69.745	2537.94	10.631
Ecad MO CO	Complete Overlap	h3b9	6.592	534.688	91.559	3535.362	10.631
Ecad MO CO	Complete Overlap	h3b9	6.592	488.176	79.691	4062.162	10.631
Ecad MO CO	Complete Overlap	h3b9	6.592	430.114	116.801	4095	10.631
Ecad MO CO	Complete Overlap	h3b9	6.592	412.959	89.605	2691.926	10.631
Ecad MO CO	Complete Overlap
Ecad MO CO	Complete Overlap	h3b10	6.592	1018.357	62.856	3823.106	10.631
Ecad MO CO	Complete Overlap	h3b10	6.592	857.595	73.635	3036.921	10.631
Ecad MO CO	Complete Overlap	h3b10	6.592	716.714	69.745	2537.94	10.631
Ecad MO CO	Complete Overlap	h3b10	6.43	877.618	136.998	4086.376	10.367
Ecad MO CO	Complete Overlap	h3b10	6.43	758.554	111.633	4095	10.367
Ecad MO CO	Complete Overlap	h3b10	6.052	1355.482	199.511	4095	9.752
Ecad MO CO	Complete Overlap	h3b10	6.052	1260.448	193.252	4095	9.752
Ecad MO CO	Complete Overlap	h3b10	6.052	1185.397	191.966	4095	9.752
Ecad MO CO	Complete Overlap	h3b10	6.052	1248.225	100.568	4095	9.752
Ecad MO CO	Complete Overlap	h3b10	6.052	1368.576	204.324	4095	9.752
Ecad MO CO	Complete Overlap
Ecad MO CO	Complete Overlap	h3b11	11.942	846.183	41.675	4077.093	19.329
Ecad MO CO	Complete Overlap	h3b11	11.942	1004.657	98.116	4093.576	19.329
Ecad MO CO	Complete Overlap	h3b11	11.942	1008.072	128.254	3973.111	19.329
Ecad MO CO	Complete Overlap	h3b11	11.942	1016.706	108.201	4062.065	19.329
Ecad MO CO	Complete Overlap	h3b11	11.942	1033.825	150.629	4095	19.329
Ecad MO CO	Complete Overlap	h3b11	11.942	1042.108	95.187	4095	19.329
Ecad MO CO	Complete Overlap	h3b11	11.942	1118.672	180.375	4095	19.329
Ecad MO CO	Complete Overlap	h3b11	10.483	1101.877	248.539	4095	16.957
Ecad MO CO	Complete Overlap
Ecad MO CO	Complete Overlap	h3b12	8.808	1300.899	191.877	4095	14.231
Ecad MO CO	Complete Overlap	h3b12	8.808	1382.763	194.172	3978.35	14.231
Ecad MO CO	Complete Overlap	h3b12	8.808	1423.062	154.121	4085.644	14.231
Ecad MO CO	Complete Overlap	h3b12	8.808	1633.967	198.808	4095	14.231
Ecad MO CO	Complete Overlap	h3b12	8.808	1814.355	86.183	4094.471	14.231
Ecad MO CO	Complete Overlap	h3b12	8.808	1643.968	47.985	4095	14.231
Ecad MO CO	Complete Overlap
Ecad MO CO	Complete Overlap	h3b13	11.077	562.921	3.412	2326.811	17.923
Ecad MO CO	Complete Overlap	h3b13	11.077	447.803	10.674	2006.2	17.923
Ecad MO CO	Complete Overlap	h3b13	11.077	394.329	8.279	1612.756	17.923
Ecad MO CO	Complete Overlap	h3b13	13.563	474.504	29.052	3813.24	21.965
Ecad MO CO	Complete Overlap	h3b13	13.563	563.435	30.738	4087.405	21.965
Ecad MO CO	Complete Overlap	h3b13	13.563	537.552	21.947	4095	21.965
Ecad MO CO	Complete Overlap	h3b13	11.455	741.981	90.14	4095	18.538
Ecad MO CO	Complete Overlap	h3b13	11.455	738.233	45.673	4095	18.538
Ecad MO CO	Complete Overlap
Ecad MO CO	Complete Overlap	h3b14	8.591	883.184	113.403	4092.518	13.882
Ecad MO CO	Complete Overlap	h3b14	8.591	834.168	56.225	3983.839	13.882
Ecad MO CO	Complete Overlap	h3b14	8.591	711.738	40.17	2382.926	13.882
Ecad MO CO	Complete Overlap	h3b14	8.591	516.485	27.9	3055.715	13.882
Ecad MO CO	Complete Overlap	h3b14	8.591	409.618	41.408	1600.724	13.882
Ecad MO CO	Complete Overlap	h3b14	8.591	404.682	31.91	1780.679	13.882
Ecad MO CO	Complete Overlap
Ecad MO CO	Complete Overlap	h3b15	4.377	532.131	22.32	3894.081	7.029
Ecad MO CO	Complete Overlap	h3b15	4.377	461.116	33.66	3419.377	7.029
Ecad MO CO	Complete Overlap	h3b15	4.377	381.736	52.292	1957.809	7.029
Ecad MO CO	Complete Overlap	h3b15	4.377	311.913	55.533	1137.149	7.029
Ecad MO CO	Complete Overlap	h3b15	4.377	320.226	34.41	1603.887	7.029
Ecad MO CO	Complete Overlap
Ecad MO CO	Complete Overlap	h3b16	13.833	822.837	28.582	2743.504	22.404
Ecad MO CO	Complete Overlap	h3b16	13.833	652.559	31.437	3207.997	22.404
Ecad MO CO	Complete Overlap	h3b16	13.13	995.47	92.415	3410.847	21.262
Ecad MO CO	Complete Overlap	h3b16	13.13	845.747	122.504	3674.454	21.262
Ecad MO CO	Complete Overlap	h3b16	13.563	1518.178	180.363	4095	21.965
Ecad MO CO	Complete Overlap	h4b1	9.456	1506.474	63.399	4095	15.287
Ecad MO CO	Complete Overlap	h4b1	9.456	1032.493	86.269	4095	15.287
Ecad MO CO	Complete Overlap	h4b1	9.456	687.291	97.506	4085.124	15.287
Ecad MO CO	Complete Overlap	h4b1	9.456	464.383	20.183	4095	15.287
Ecad MO CO	Complete Overlap	h4b1	9.456	351.91	16.564	3773.255	15.287
Ecad MO CO	Complete Overlap
Ecad MO CO	Complete Overlap	h4b2	4.863	1181.53	120.373	4095	7.774
Ecad MO CO	Complete Overlap	h4b2	4.863	1344.9	313.324	4095	7.774
Ecad MO CO	Complete Overlap	h4b2	4.863	1529.922	244.244	4095	7.774
Ecad MO CO	Complete Overlap	h4b2	4.863	1729.776	178.748	4095	7.774
Ecad MO CO	Complete Overlap	h4b2	4.863	1867.033	301.32	4095	7.774
Ecad MO CO	Complete Overlap	h4b2	4.863	1486.171	135.61	4095	7.774
Ecad MO CO	Complete Overlap
Ecad MO CO	Complete Overlap	h4b3	5.025	1087.726	120.297	3564.588	8.083
Ecad MO CO	Complete Overlap	h4b3	5.025	1496.532	111.708	4095	8.083
Ecad MO CO	Complete Overlap	h4b3	5.025	1576.434	83.918	4095	8.083
Ecad MO CO	Complete Overlap	h4b3	5.025	1613.145	93.497	4095	8.083
Ecad MO CO	Complete Overlap	h4b3	5.025	1481.642	123.302	4095	8.083
Ecad MO CO	Complete Overlap	h4b3	5.025	1017.161	99.182	4095	8.083
Ecad MO CO	Complete Overlap	h4b3	5.025	342.927	30.655	1079.959	8.083
Ecad MO CO	Complete Overlap
Ecad MO CO	Complete Overlap	h4b4	10.861	995.748	46.366	4071.035	17.572
Ecad MO CO	Complete Overlap	h4b4	10.861	1284.859	52.389	4095	17.572
Ecad MO CO	Complete Overlap	h4b4	10.861	1342.522	105.576	4095	17.572
Ecad MO CO	Complete Overlap	h4b4	10.861	1319.586	99.984	4095	17.572
Ecad MO CO	Complete Overlap	h4b4	10.861	1265.086	105.932	4095	17.572
Ecad MO CO	Complete Overlap	h4b4	10.861	942.266	55.53	4095	17.572
Ecad MO CO	Complete Overlap	h4b4	10.861	596.184	28.429	4048.669	17.572
Ecad MO CO	Complete Overlap
Ecad MO CO	Complete Overlap	h4b5	8.808	357.664	14.292	1169.733	14.233
Ecad MO CO	Complete Overlap	h4b5	8.808	619.388	36.359	2949.421	14.233
Ecad MO CO	Complete Overlap	h4b5	8.808	861.235	55.484	4095	14.233
Ecad MO CO	Complete Overlap	h4b5	8.808	980.764	144.696	4095	14.233
Ecad MO CO	Complete Overlap	h4b5	8.808	958.381	129.045	4095	14.233
Ecad MO CO	Complete Overlap	h4b5	8.808	947.665	133.792	4095	14.233
Ecad MO CO	Complete Overlap	h4b5	8.808	956.811	114.969	4095	14.233
Ecad MO CO	Complete Overlap	h4b5	8.808	854.086	70.165	4079.965	14.233
Ecad MO CO	Complete Overlap	h4b5	8.808	706.83	20.11	3366.903	14.233
Ecad MO CO	Complete Overlap
Ecad MO CO	Complete Overlap	h4b6	6.808	1196.004	76.235	4095	10.982
Ecad MO CO	Complete Overlap	h4b6	6.808	1194.428	70.66	4095	10.982
Ecad MO CO	Complete Overlap	h4b6	6.808	1398.875	130.869	4095	10.982
Ecad MO CO	Complete Overlap	h4b6	6.808	1526.972	142.297	4095	10.982
Ecad MO CO	Complete Overlap	h4b6	6.808	1736.22	183.863	4095	10.982
Ecad MO CO	Complete Overlap	h4b6	6.808	1754.404	188.101	4095	10.982
Ecad MO CO	Complete Overlap	h4b6	6.808	1149.344	126.736	4095	10.982
Ecad MO CO	Complete Overlap
Ecad MO CO	Complete Overlap	h4b7	6.052	345.099	30.697	1310.82	9.752
Ecad MO CO	Complete Overlap	h4b7	6.052	682.806	41.272	3690.503	9.752
Ecad MO CO	Complete Overlap	h4b7	6.052	989.984	44.417	4095	9.752
Ecad MO CO	Complete Overlap	h4b7	6.052	1190.768	202.484	4095	9.752
Ecad MO CO	Complete Overlap	h4b7	6.052	1440.593	272.049	4095	9.752
Ecad MO CO	Complete Overlap	h4b7	6.052	1810.485	289.196	4095	9.752
Ecad MO CO	Complete Overlap	h4b7	6.052	2262.609	229.742	4095	9.752
Ecad MO CO	Complete Overlap	h4b7	6.052	2044.153	290.741	4095	9.752
Ecad MO CO	Complete Overlap	h4b7	6.052	736.741	242.173	2758.207	9.752
Ecad MO CO	Complete Overlap
Ecad MO CO	Complete Overlap	h4b8	9.888	182.445	8.169	1627.837	15.99
Ecad MO CO	Complete Overlap	h4b8	9.888	337.503	26.935	3768.821	15.99
Ecad MO CO	Complete Overlap	h4b8	9.888	549.582	37.9	4095	15.99
Ecad MO CO	Complete Overlap	h4b8	9.888	1003.139	132.609	4094.61	15.99
Ecad MO CO	Complete Overlap	h4b8	9.888	1197.703	150.745	4065.109	15.99
Ecad MO CO	Complete Overlap	h4b8	9.888	1260.768	177.656	4095	15.99
Ecad MO CO	Complete Overlap	h4b8	9.888	1292.716	79.442	4095	15.99
Ecad MO CO	Complete Overlap	h4b8	9.888	1075.012	52.723	3442.526	15.99
Ecad MO CO	Complete Overlap	h4b8	9.888	891.154	43.335	4095	15.99
Ecad MO CO	Complete Overlap
Ecad MO CO	Complete Overlap	h4b9	8.429	719.193	52.458	2737.353	13.617
Ecad MO CO	Complete Overlap	h4b9	8.429	1083.869	80.18	4095	13.617
Ecad MO CO	Complete Overlap	h4b9	8.429	1310.757	140.964	4095	13.617
Ecad MO CO	Complete Overlap	h4b9	8.429	1495.862	180.836	4095	13.617
Ecad MO CO	Complete Overlap	h4b9	8.429	1601.518	204.754	4095	13.617
Ecad MO CO	Complete Overlap	h4b9	8.429	1679.904	243.296	4095	13.617
Ecad MO CO	Complete Overlap	h4b9	8.429	1432.07	126.525	4095	13.617
Ecad MO CO	Complete Overlap	h4b9	8.429	749.604	73.133	3853.738	13.617
Ecad MO CO	Complete Overlap
Ecad MO CO	Complete Overlap	h4b10	14.157	709.451	20.439	4062.052	22.931
Ecad MO CO	Complete Overlap	h4b10	14.157	888.241	78.002	4095	22.931
Ecad MO CO	Complete Overlap	h4b10	14.157	995.276	150.118	4095	22.931
Ecad MO CO	Complete Overlap	h4b10	14.157	1059.154	211.139	4095	22.931
Ecad MO CO	Complete Overlap	h4b10	14.157	961.543	151.487	4023.566	22.931
Ecad MO CO	Complete Overlap	h4b10	14.157	631.526	94.356	3986.41	22.931
Ecad MO CO	Complete Overlap	h4b10	14.157	429.651	36.178	3195.814	22.931
Ecad MO CO	Complete Overlap
Ecad MO CO	Complete Overlap	h4b11	6.16	976.201	33.942	4095	9.928
Ecad MO CO	Complete Overlap	h4b11	6.16	860.841	74.396	4095	9.928
Ecad MO CO	Complete Overlap	h4b11	6.16	854.581	41.207	4095	9.928
Ecad MO CO	Complete Overlap	h4b11	6.16	747.454	57.033	4095	9.928
Ecad MO CO	Complete Overlap	h4b11	6.16	637.571	74.09	2134.979	9.928
Ecad MO CO	Complete Overlap	h4b11	6.16	542.786	77.149	3881.762	9.928
Ecad MO CO	Complete Overlap
Ecad MO CO	Complete Overlap	h4b12	5.133	1176.117	110.095	4095	8.259
Ecad MO CO	Complete Overlap	h4b12	5.133	1227.243	87.072	4095	8.259
Ecad MO CO	Complete Overlap	h4b12	5.133	1267.709	98.253	4095	8.259
Ecad MO CO	Complete Overlap	h4b12	5.133	1215.754	56.028	4095	8.259
Ecad MO CO	Complete Overlap	h4b12	5.133	792.903	56.935	3989.507	8.259
Ecad MO CO	Complete Overlap	h4b12	5.133	576.476	65.691	3260.956	8.259
Ecad MO CO	Complete Overlap	h4b12	5.133	545.768	70.977	3448.095	8.259
Ecad MO CO	Complete Overlap
Ecad MO CO	Complete Overlap	h4b13	8.916	348.856	4.557	1315.278	14.409
Ecad MO CO	Complete Overlap	h4b13	8.916	665.931	15.087	2982.539	14.409
Ecad MO CO	Complete Overlap	h4b13	8.916	962.966	26.65	4095	14.409
Ecad MO CO	Complete Overlap	h4b13	8.916	1017.088	123.628	4095	14.409
Ecad MO CO	Complete Overlap	h4b13	8.916	1107.38	171.217	4095	14.409
Ecad MO CO	Complete Overlap	h4b13	8.916	1226.667	135.039	4095	14.409
Ecad MO CO	Complete Overlap	h4b13	8.916	766.77	77.36	2776.347	14.409
Ecad MO CO	Complete Overlap	h4b13	8.916	399.176	51.302	1888.356	14.409
Ecad MO CO	Complete Overlap	h4b13	8.916	335.061	35.101	3638.036	14.409
Ecad MO CO	Complete Overlap
Ecad MO CO	Complete Overlap	h4b14	10.375	851.229	54.626	3365.096	16.781
Ecad MO CO	Complete Overlap	h4b14	10.375	950.871	75.837	3156.868	16.781
Ecad MO CO	Complete Overlap	h4b14	10.375	1073.958	62.681	4095	16.781
Ecad MO CO	Complete Overlap	h4b14	10.375	1153.977	44.579	4095	16.781
Ecad MO CO	Complete Overlap	h4b14	10.375	1217.015	51.765	4095	16.781
Ecad MO CO	Complete Overlap	h4b14	10.375	1242.963	91.649	4095	16.781
Ecad MO CO	Complete Overlap	h4b14	10.375	963.441	80.486	4095	16.781
Ecad MO CO	Complete Overlap	h4b14	10.375	765.493	89.445	4095	16.781
Ecad MO CO	Complete Overlap
Ecad MO CO	Complete Overlap	h4b15	4.323	958.481	49.058	3903.16	6.941
Ecad MO CO	Complete Overlap	h4b15	4.323	1139.668	52.83	4095	6.941
Ecad MO CO	Complete Overlap	h4b15	4.323	1518.993	114.79	4095	6.941
Ecad MO CO	Complete Overlap	h4b15	4.323	1734.025	148.101	4095	6.941
Ecad MO CO	Complete Overlap	h4b15	4.323	1547.482	135.334	4095	6.941
Ecad MO CO	Complete Overlap	h4b15	4.323	629.691	88.898	3317.177	6.941
Ecad MO CO	Complete Overlap	h4b15	4.323	266.734	18.848	1492.151	6.941
Ecad MO CO	Complete Overlap
Ecad MO CO	Complete Overlap	h4b16	13.509	426.389	14.131	1239.421	21.877
Ecad MO CO	Complete Overlap	h4b16	13.509	871.733	30.408	4000.239	21.877
Ecad MO CO	Complete Overlap	h4b16	13.509	1088.446	50.589	4095	21.877
Ecad MO CO	Complete Overlap	h4b16	13.509	1234.747	79.17	4095	21.877
Ecad MO CO	Complete Overlap	h4b16	13.509	1309.473	44.455	4095	21.877
Ecad MO CO	Complete Overlap	h4b16	13.509	1305.111	77.992	4095	21.877
Ecad MO CO	Complete Overlap	h4b16	13.509	1137.624	97.85	4095	21.877
Ecad MO CO	Complete Overlap	h4b16	13.509	1085.653	95.981	4095	21.877
Ecad MO CO	Complete Overlap	h4b16	13.509	1017.656	90.555	4095	21.877
Ecad MO CO	Complete Overlap
Ecad MO CO	Complete Overlap	h4b17	7.403	924.596	65.016	3527.29	11.925
Ecad MO CO	Complete Overlap	h4b17	7.403	968.049	219.871	4012.704	11.925
Ecad MO CO	Complete Overlap	h4b17	7.403	1110.656	230.03	4071.571	11.925
Ecad MO CO	Complete Overlap	h4b17	7.403	1238.326	197.473	4093.373	11.925
Ecad MO CO	Complete Overlap	h4b17	7.403	1312.098	177.23	4095	11.925
Ecad MO CO	Complete Overlap	h4b17	7.403	1427.752	162.49	4095	11.925
Ecad MO CO	Complete Overlap	h4b17	7.403	1104.808	109.253	4095	11.925
Ecad MO CO	Complete Overlap	h4b17	7.403	854.851	120.335	3934.543	11.925
Ecad MO CO	Complete Overlap
Ecad MO CO	Complete Overlap	h4b18	15.886	716.314	19.944	3847.253	25.743
Ecad MO CO	Complete Overlap	h4b18	15.886	817.419	24.544	3606.995	25.743
Ecad MO CO	Complete Overlap	h4b18	15.886	929.52	23.974	4093.96	25.743
Ecad MO CO	Complete Overlap	h4b18	15.886	1025.954	58.057	4095	25.743
Ecad MO CO	Complete Overlap	h4b18	15.886	897.708	30.152	4095	25.743
Ecad MO CO	Complete Overlap	h4b18	15.886	505.556	44.178	2506.815	25.743
Ecad MO CO	Complete Overlap	h4b18	15.886	408.905	25.274	2455.841	25.743
Ecad MO CO	Complete Overlap	h5b1	9.402	247.503	10.497	1223.12	15.197
Ecad MO CO	Complete Overlap	h5b1	9.402	482.12	22.434	3428.79	15.197
Ecad MO CO	Complete Overlap	h5b1	9.402	645.29	79.325	4095	15.197
Ecad MO CO	Complete Overlap	h5b1	9.402	844.987	107.766	4095	15.197
Ecad MO CO	Complete Overlap	h5b1	9.402	1120.2	101.886	4095	15.197
Ecad MO CO	Complete Overlap	h5b1	9.402	1380.557	98.731	4095	15.197
Ecad MO CO	Complete Overlap	h5b1	9.402	1373.296	70.594	4095	15.197
Ecad MO CO	Complete Overlap	h5b1	9.402	1276.803	115.984	4095	15.197
Ecad MO CO	Complete Overlap
Ecad MO CO	Complete Overlap	h5b2	11.023	801.798	3.288	4095	17.835
Ecad MO CO	Complete Overlap	h5b2	11.023	723.542	27.127	4095	17.835
Ecad MO CO	Complete Overlap	h5b2	9.294	936.333	133.121	3306.941	15.024
Ecad MO CO	Complete Overlap	h5b2	9.294	1239.204	119.879	4095	15.024
Ecad MO CO	Complete Overlap	h5b2	9.294	1132.943	144.531	3909.488	15.024
Ecad MO CO	Complete Overlap	h5b2	9.294	1001.878	193.253	4095	15.024
Ecad MO CO	Complete Overlap	h5b2	9.294	1033.057	106.352	4095	15.024
Ecad MO CO	Complete Overlap	h5b2	9.294	903.158	49.852	4095	15.024
Ecad MO CO	Complete Overlap
Ecad MO CO	Complete Overlap	h5b3	8.105	931.283	33.27	4031.736	13.091
Ecad MO CO	Complete Overlap	h5b3	8.105	960.883	52.792	4095	13.091
Ecad MO CO	Complete Overlap	h5b3	8.105	961.156	110.876	4095	13.091
Ecad MO CO	Complete Overlap	h5b3	8.105	1026.457	168.82	4095	13.091
Ecad MO CO	Complete Overlap	h5b3	8.105	1055.636	171.236	4095	13.091
Ecad MO CO	Complete Overlap	h5b3	8.105	1068.845	135.539	4087.447	13.091
Ecad MO CO	Complete Overlap	h5b3	8.105	752.749	92.879	3925.814	13.091
Ecad MO CO	Complete Overlap
Ecad MO CO	Complete Overlap	h5b4	8.7	940.295	51.118	3691.862	14.057
Ecad MO CO	Complete Overlap	h5b4	8.7	1168.471	48.09	4095	14.057
Ecad MO CO	Complete Overlap	h5b4	8.7	1082.641	55.522	4035.934	14.057
Ecad MO CO	Complete Overlap	h5b4	8.7	884.159	21.85	3905.928	14.057
Ecad MO CO	Complete Overlap	h5b4	8.7	796.045	49.202	4095	14.057
Ecad MO CO	Complete Overlap	h5b4	8.7	619.822	14.734	4095	14.057
Ecad MO CO	Complete Overlap
Ecad MO CO	Complete Overlap	h5b5	9.294	663.668	59.035	4095	15.024
Ecad MO CO	Complete Overlap	h5b5	9.294	801.607	53.024	4095	15.024
Ecad MO CO	Complete Overlap	h5b5	9.294	901.256	63.378	4009.496	15.024
Ecad MO CO	Complete Overlap	h5b5	9.294	961.119	51.638	4095	15.024
Ecad MO CO	Complete Overlap	h5b5	9.294	759.82	72.058	4068.506	15.024
Ecad MO CO	Complete Overlap	h5b5	9.294	446.922	49.595	2591.97	15.024
Ecad MO CO	Complete Overlap
Ecad MO CO	Complete Overlap	h5b6	13.563	782.769	62.763	4095	21.964
Ecad MO CO	Complete Overlap	h5b6	13.563	910.387	109.741	4095	21.964
Ecad MO CO	Complete Overlap	h5b6	13.563	952.107	92.077	4095	21.964
Ecad MO CO	Complete Overlap	h5b6	13.563	982.156	162.055	4095	21.964
Ecad MO CO	Complete Overlap	h5b6	13.563	852.969	93.157	4079.582	21.964
Ecad MO CO	Complete Overlap	h5b6	13.563	554.479	60.716	4058.306	21.964
Ecad MO CO	Complete Overlap
Ecad MO CO	Complete Overlap	h5b7	9.51	1048.909	69.331	4095	15.375
Ecad MO CO	Complete Overlap	h5b7	9.51	1115.683	36.209	4095	15.375
Ecad MO CO	Complete Overlap	h5b7	9.51	1129.403	74.246	4095	15.375
Ecad MO CO	Complete Overlap	h5b7	9.51	1013.857	128.691	4095	15.375
Ecad MO CO	Complete Overlap	h5b7	9.51	700.497	70.402	3578.709	15.375
Ecad MO CO	Complete Overlap	h5b7	9.51	627.01	51.382	4095	15.375
Ecad MO CO	Complete Overlap
Ecad MO CO	Complete Overlap	h5b8	9.888	834.261	0	3491.254	15.99
Ecad MO CO	Complete Overlap	h5b8	9.888	897.959	0	4080.791	15.99
Ecad MO CO	Complete Overlap	h5b8	9.888	820.922	0	4068.635	15.99
Ecad MO CO	Complete Overlap	h5b8	9.888	656.014	0	3970.698	15.99
Ecad MO CO	Complete Overlap	h5b8	9.888	512.42	0	2619.29	15.99
Ecad MO CO	Complete Overlap	h5b8	9.888	376.269	0	3169.93	15.99
Ecad MO CO	Complete Overlap
Ecad MO CO	Complete Overlap	h5b9	5.782	991.41	68.31	4095	9.313
Ecad MO CO	Complete Overlap	h5b9	5.782	1071.031	85.501	4095	9.313
Ecad MO CO	Complete Overlap	h5b9	5.782	1110.118	110.126	4095	9.313
Ecad MO CO	Complete Overlap	h5b9	5.782	1020.645	148.606	3997.052	9.313
Ecad MO CO	Complete Overlap	h5b9	5.782	884.93	94.644	3350.548	9.313
Ecad MO CO	Complete Overlap	h5b9	5.782	793.681	105.799	3961.148	9.313
Ecad MO CO	Complete Overlap	h5b9	5.782	558.569	72.973	2806.057	9.313
Ecad MO CO	Complete Overlap
Ecad MO CO	Complete Overlap	h5b10	11.185	1063.448	99.785	4095	18.099
Ecad MO CO	Complete Overlap	h5b10	11.185	1216.921	148.438	4095	18.099
Ecad MO CO	Complete Overlap	h5b10	11.185	1414.389	253.794	4095	18.099
Ecad MO CO	Complete Overlap	h5b10	11.185	1422.716	193.151	4095	18.099
Ecad MO CO	Complete Overlap	h5b10	11.185	1262.996	178.742	4095	18.099
Ecad MO CO	Complete Overlap	h5b10	11.185	853.682	97.916	4095	18.099
Ecad MO CO	Complete Overlap	h5b10	11.185	428.245	31.148	4033.15	18.099
Ecad MO CO	Complete Overlap	h6b1	9.24	1114.705	37.302	3105.488	14.936
Ecad MO CO	Complete Overlap	h6b1	9.24	868.528	34.634	2963.511	14.936
Ecad MO CO	Complete Overlap	h6b1	8.97	1185.45	211.495	4094.134	14.495
Ecad MO CO	Complete Overlap	h6b1	8.97	1033.706	170.905	3722.151	14.495
Ecad MO CO	Complete Overlap	h6b1	8.97	717.641	92.837	3243.577	14.495
Ecad MO CO	Complete Overlap	h6b1	8.7	1252.994	173.09	3746.058	14.057
Ecad MO CO	Complete Overlap	h6b1	8.7	1042.481	86.525	3977.847	14.057
Ecad MO CO	Complete Overlap	h6b1	8.7	796.604	94.134	3726.635	14.057
Ecad MO CO	Complete Overlap	h6b1	8.7	613.989	51.225	4082.856	14.057
Ecad MO CO	Complete Overlap	h6b1	8.7	379.679	26.288	2560.427	14.057
Ecad MO CO	Complete Overlap
Ecad MO CO	Complete Overlap	h6b2	7.295	1422.564	120.694	4036.415	11.751
Ecad MO CO	Complete Overlap	h6b2	7.295	1670.566	97.752	4095	11.751
Ecad MO CO	Complete Overlap	h6b2	7.295	2023.023	162.125	4095	11.751
Ecad MO CO	Complete Overlap	h6b2	7.295	1900.49	218.384	4095	11.751
Ecad MO CO	Complete Overlap	h6b2	7.295	1698.948	204.184	4095	11.751
Ecad MO CO	Complete Overlap	h6b2	7.295	1446.299	214.954	4095	11.751
Ecad MO CO	Complete Overlap	h6b2	7.295	1032.344	124.086	4095	11.751
Ecad MO CO	Complete Overlap	h6b2	7.295	457.757	103.886	3249.571	11.751
Ecad MO CO	Complete Overlap
Ecad MO CO	Complete Overlap	h6b3	9.564	834.791	8.15	4095	15.463
Ecad MO CO	Complete Overlap	h6b3	8.051	1714.217	238.307	4095	12.999
Ecad MO CO	Complete Overlap	h6b3	8.051	1844.617	314.904	4095	12.999
Ecad MO CO	Complete Overlap	h6b3	8.051	1212.171	264.072	4095	12.999
Ecad MO CO	Complete Overlap	h6b3	8.051	1045.263	164.525	4095	12.999
Ecad MO CO	Complete Overlap	h6b3	8.051	911.26	203.449	4029.471	12.999
Ecad MO CO	Complete Overlap	h6b3	8.051	847.65	235.738	3091.978	12.999
Ecad MO CO	Complete Overlap
Ecad MO CO	Complete Overlap	h6b4	11.725	1113.572	34.172	4095	18.977
Ecad MO CO	Complete Overlap	h6b4	10.807	1442.584	95.583	4095	17.484
Ecad MO CO	Complete Overlap	h6b4	10.807	1382.426	101.053	4095	17.484
Ecad MO CO	Complete Overlap	h6b4	10.807	781.054	99.272	2161.247	17.484
Ecad MO CO	Complete Overlap	h6b4	10.321	1125.839	178.639	4092.589	16.692
Ecad MO CO	Complete Overlap	h6b4	10.321	1077.506	188.027	4095	16.692
Ecad MO CO	Complete Overlap	h6b4	10.321	836.954	122.526	3956.891	16.692
Ecad MO CO	Complete Overlap	h6b4	10.321	412.447	33.808	2928.761	16.692
Ecad MO CO	Complete Overlap	h6b4	10.321	249.701	26.092	902.336	16.692
Ecad MO CO	Complete Overlap
Ecad MO CO	Complete Overlap	h6b5	5.187	1040.743	55.297	4095	8.347
Ecad MO CO	Complete Overlap	h6b5	5.187	1155.85	88.728	4095	8.347
Ecad MO CO	Complete Overlap	h6b5	5.187	1265.842	172.473	4095	8.347
Ecad MO CO	Complete Overlap	h6b5	5.187	1491.278	171.822	4095	8.347
Ecad MO CO	Complete Overlap	h6b5	5.187	1689.287	214.206	4095	8.347
Ecad MO CO	Complete Overlap	h6b5	5.187	1721.307	198.748	4092.222	8.347
Ecad MO CO	Complete Overlap	h6b5	5.187	1622.949	265.573	3941.088	8.347
Ecad MO CO	Complete Overlap	h6b5	5.187	1394.594	202.347	4095	8.347
Ecad MO CO	Complete Overlap	h6b5	5.187	757.248	138.444	4042.139	8.347
Ecad MO CO	Complete Overlap
Ecad MO CO	Complete Overlap	h6b6	6.43	1544.916	67.452	4095	10.367
Ecad MO CO	Complete Overlap	h6b6	6.43	1335.529	59.114	4095	10.367
Ecad MO CO	Complete Overlap	h6b6	6.43	964.258	52.546	4095	10.367
Ecad MO CO	Complete Overlap	h6b6	8.213	1500.581	115.662	4095	13.265
Ecad MO CO	Complete Overlap	h6b6	8.213	1541.774	96.11	4095	13.265
Ecad MO CO	Complete Overlap	h6b6	8.213	1329.025	109.51	4095	13.265
Ecad MO CO	Complete Overlap	h6b6	8.213	1144.263	153.849	3711.599	13.265
Ecad MO CO	Complete Overlap	h6b6	8.213	1063.663	103.936	3814.271	13.265
Ecad MO CO	Complete Overlap
Ecad MO CO	Complete Overlap	h6b7	10.266	794.737	3.425	4095	16.605
Ecad MO CO	Complete Overlap	h6b7	10.266	747.133	25.613	4095	16.605
Ecad MO CO	Complete Overlap	h6b7	10.266	658.963	51.34	4095	16.605
Ecad MO CO	Complete Overlap	h6b7	10.266	576.979	50.098	4052.057	16.605
Ecad MO CO	Complete Overlap	h6b7	10.266	602.529	47.77	4059.872	16.605
Ecad MO CO	Complete Overlap
Ecad MO CO	Complete Overlap	h6b8	7.403	1028.992	1.64	3603.374	11.948
Ecad MO CO	Complete Overlap	h6b8	7.403	858.648	20.09	2748.316	11.948
Ecad MO CO	Complete Overlap	h6b8	7.403	588.585	25.088	2202.131	11.948
Ecad MO CO	Complete Overlap	h6b8	7.403	464.149	32.037	3590.852	11.948
Ecad MO CO	Complete Overlap	h6b8	7.078	1073.862	131.409	3846.607	11.422
Ecad MO CO	Complete Overlap	h6b8	7.078	867.128	173.681	2933.317	11.422
Ecad MO CO	Complete Overlap	h6b8	7.078	855.62	161.498	2922.009	11.422
Ecad MO CO	Complete Overlap	h6b8	7.078	829.562	154.367	4095	11.422
Ecad MO CO	Complete Overlap	h6b8	7.078	808.237	106.592	4094.148	11.422
Ecad MO CO	Complete Overlap	h6b8	7.078	548.066	77.822	2028.609	11.422
Ecad MO CO	Complete Overlap	h6b8	7.078	442.648	36.998	2559.644	11.422
Ecad MO CO	Complete Overlap
Ecad MO CO	Complete Overlap	h6b9	9.726	441.223	19.737	4048.483	15.727
Ecad MO CO	Complete Overlap	h6b9	9.726	620.698	41.5	4086.771	15.727
Ecad MO CO	Complete Overlap	h6b9	9.726	798.199	52.767	4095	15.727
Ecad MO CO	Complete Overlap	h6b9	9.726	678.014	85.237	4089.281	15.727
Ecad MO CO	Complete Overlap	h6b9	10.104	1001.843	101.195	4095	16.342
Ecad MO CO	Complete Overlap	h6b9	10.104	932.705	101.634	4095	16.342
Ecad MO CO	Complete Overlap	h6b9	10.104	825.992	86.203	3947.192	16.342
Ecad MO CO	Complete Overlap	h6b9	10.104	722.051	45.076	4095	16.342
Ecad MO CO	Complete Overlap	h6b9	10.104	414.621	24.196	2298.171	16.342
Ecad MO CO	Complete Overlap
Ecad MO CO	Complete Overlap	h6b10	7.565	1026.48	30.384	3256.49	12.212
Ecad MO CO	Complete Overlap	h6b10	7.565	942.575	50.164	3438.961	12.212
Ecad MO CO	Complete Overlap	h6b10	7.565	709.205	99.602	2064.503	12.212
Ecad MO CO	Complete Overlap	h6b10	8.429	1351.324	210.759	4095	13.615
Ecad MO CO	Complete Overlap	h6b10	8.429	1446.254	144.712	4094.013	13.615
Ecad MO CO	Complete Overlap	h6b10	8.429	1385.614	113.864	4095	13.615
Ecad MO CO	Complete Overlap	h6b10	8.429	1235.795	147.123	4095	13.615
Ecad MO CO	Complete Overlap	h6b10	8.429	971.209	141.964	4095	13.615
Ecad MO CO	Complete Overlap	h6b10	8.429	547.645	35.636	4071.343	13.615
Ecad MO CO	Complete Overlap
Ecad MO CO	Complete Overlap	h6b11	8.375	1497.861	259.151	4095	13.53
Ecad MO CO	Complete Overlap	h6b11	8.375	1127.845	171.154	4095	13.53
Ecad MO CO	Complete Overlap	h6b11	8.375	1005.518	132.693	4095	13.53
Ecad MO CO	Complete Overlap	h6b11	8.375	934.155	66.144	4095	13.53
Ecad MO CO	Complete Overlap	h6b11	8.375	805.055	33.664	4095	13.53
Ecad MO CO	Complete Overlap
Ecad MO CO	Complete Overlap	h6b12	8.429	1332.542	39.229	4095	13.618
Ecad MO CO	Complete Overlap	h6b12	8.429	1279.411	49.054	4095	13.618
Ecad MO CO	Complete Overlap	h6b12	8.429	1147.43	31.283	4095	13.618
Ecad MO CO	Complete Overlap	h6b12	9.078	1859.23	249.295	4095	14.672
Ecad MO CO	Complete Overlap	h6b12	9.078	1761.613	193.758	4095	14.672
Ecad MO CO	Complete Overlap	h6b12	9.078	1564.924	89.449	4095	14.672
Ecad MO CO	Complete Overlap	h6b12	9.078	1323.976	88.838	4095	14.672
Ecad MO CO	Complete Overlap	h6b12	9.078	848.267	68.706	3274.454	14.672
Ecad MO CO	Complete Overlap	h7b1	6.322	440.026	26.349	1346.523	10.192
Ecad MO CO	Complete Overlap	h7b1	6.322	336.15	29.08	1168.647	10.192
Ecad MO CO	Complete Overlap	h7b1	6.322	306.953	17.322	1502.275	10.192
Ecad MO CO	Complete Overlap	h7b1	6.322	284.998	7.263	1878.067	10.192
Ecad MO CO	Complete Overlap	h7b1	6.322	404.277	23.744	2759.453	10.192
Ecad MO CO	Complete Overlap	h7b1	6.322	611.456	46.114	4095	10.192
Ecad MO CO	Complete Overlap	h7b1	6.322	522.901	45.144	4095	10.192
Ecad MO CO	Complete Overlap	h7b1	6.322	360.49	50.837	2786.285	10.192
Ecad MO CO	Complete Overlap	h7b1	6.322	261.371	32.019	1248.368	10.192
Ecad MO CO	Complete Overlap	h7b1	6.322	314.366	29.927	1500.99	10.192
Ecad MO CO	Complete Overlap
Ecad MO CO	Complete Overlap	h7b2	4.215	422.825	2.105	1835.289	6.765
Ecad MO CO	Complete Overlap	h7b2	4.215	410.441	39.519	2399.648	6.765
Ecad MO CO	Complete Overlap	h7b2	4.215	405.754	36.382	2482.313	6.765
Ecad MO CO	Complete Overlap	h7b2	4.215	450.289	34.986	3070.522	6.765
Ecad MO CO	Complete Overlap	h7b2	4.215	439.149	39.999	2245.676	6.765
Ecad MO CO	Complete Overlap	h7b2	4.215	291.751	23.306	1282.083	6.765
Ecad MO CO	Complete Overlap
Ecad MO CO	Complete Overlap	h7b3	7.727	699.109	3.782	3311.864	12.476
Ecad MO CO	Complete Overlap	h7b3	7.727	606.8	53.736	4095	12.476
Ecad MO CO	Complete Overlap	h7b3	7.727	587.862	40.653	4095	12.476
Ecad MO CO	Complete Overlap	h7b3	7.727	557.016	20.458	4095	12.476
Ecad MO CO	Complete Overlap	h7b3	7.673	804.022	38.989	4095	12.388
Ecad MO CO	Complete Overlap	h7b3	7.673	587.322	67.306	3129.63	12.388
Ecad MO CO	Complete Overlap	h7b3	7.673	477.083	37.729	4095	12.388
Ecad MO CO	Complete Overlap	h7b3	7.673	414.304	60.225	4029.867	12.388
Ecad MO CO	Complete Overlap
Ecad MO CO	Complete Overlap	h7b4	6.592	858.37	1.697	4095	10.631
Ecad MO CO	Complete Overlap	h7b4	6.592	987.626	108.576	4095	10.631
Ecad MO CO	Complete Overlap	h7b4	6.592	923.146	136.877	4002.857	10.631
Ecad MO CO	Complete Overlap	h7b4	6.592	863.011	108.771	4095	10.631
Ecad MO CO	Complete Overlap	h7b4	6.592	756.183	34.388	4095	10.631
Ecad MO CO	Complete Overlap	h7b4	6.592	597.858	33.377	4095	10.631
Ecad MO CO	Complete Overlap	h7b4	6.592	405.766	42.56	3770.175	10.631
Ecad MO PO	Partial Overlap	h1b4	8.97	778.972	26.25	2858.483	14.497
Ecad MO PO	Partial Overlap	h1b4	8.97	1049.015	35.979	4095	14.497
Ecad MO PO	Partial Overlap	h1b4	8.97	907.88	58.514	4095	14.497
Ecad MO PO	Partial Overlap	h1b4	8.97	811.02	79.577	4095	14.497
Ecad MO PO	Partial Overlap	h1b4	8.97	642.058	55.706	4095	14.497
Ecad MO PO	Partial Overlap	h1b4	8.97	777.866	24.026	4095	14.497
Ecad MO PO	Partial Overlap	h1b4	9.78	1205.361	99.035	4095	15.815
Ecad MO PO	Partial Overlap	h1b4	9.78	1302.461	67.22	4082.8	15.815
Ecad MO PO	Partial Overlap	h1b4	9.78	1095.414	102.637	4095	15.815
Ecad MO PO	Partial Overlap	h1b4	9.78	815.865	46.595	4095	15.815
Ecad MO PO	Partial Overlap	h1b4	9.78	698.256	45.08	4090.715	15.815
Ecad MO PO	Partial Overlap	h1b4	9.78	677.538	58.898	4095	15.815
Ecad MO PO	Partial Overlap	h1b4	9.78	648.371	14.54	4095	15.815
Ecad MO PO	Partial Overlap
Ecad MO PO	Partial Overlap	h1b5	6.484	595.845	12.838	4092.857	10.454
Ecad MO PO	Partial Overlap	h1b5	6.484	606.44	22.137	4095	10.454
Ecad MO PO	Partial Overlap	h1b5	6.484	609.234	31.79	4095	10.454
Ecad MO PO	Partial Overlap	h1b5	6.484	685.482	37.047	4095	10.454
Ecad MO PO	Partial Overlap	h1b5	6.484	808.978	22.883	3760.184	10.454
Ecad MO PO	Partial Overlap	h1b5	6.484	683.789	17.461	2460.151	10.454
Ecad MO PO	Partial Overlap	h1b5	6.484	644.122	45.073	2047.626	10.454
Ecad MO PO	Partial Overlap	h1b5	6.484	640.114	3.034	3132.047	10.454
Ecad MO PO	Partial Overlap	h1b5	6.484	684.857	27.6	3861.852	10.454
Ecad MO PO	Partial Overlap	h1b5	6.484	605.419	56.312	2497.355	10.454
Ecad MO PO	Partial Overlap	h1b5	6.484	563.043	50.769	2319.383	10.454
Ecad MO PO	Partial Overlap
Ecad MO PO	Partial Overlap	h1b6	8.267	1035.564	31.85	3928.778	13.354
Ecad MO PO	Partial Overlap	h1b6	8.267	1053.71	95.667	4095	13.354
Ecad MO PO	Partial Overlap	h1b6	8.267	896.77	74.416	4095	13.354
Ecad MO PO	Partial Overlap	h1b6	8.267	768.906	40.895	4095	13.354
Ecad MO PO	Partial Overlap	h1b6	8.267	637.587	38.733	4095	13.354
Ecad MO PO	Partial Overlap	h1b6	8.267	523.203	13.223	2930.523	13.354
Ecad MO PO	Partial Overlap	h1b6	7.727	1144.847	81.377	4095	12.476
Ecad MO PO	Partial Overlap	h1b6	7.727	1162.122	108.566	4095	12.476
Ecad MO PO	Partial Overlap	h1b6	7.727	1055.72	172.983	4077.316	12.476
Ecad MO PO	Partial Overlap	h1b6	7.727	729.244	65.735	4048.91	12.476
Ecad MO PO	Partial Overlap	h1b6	7.727	450.33	13.796	2225.677	12.476
Ecad MO PO	Partial Overlap
Ecad MO PO	Partial Overlap	h1b7	14.211	919.386	18.501	4095	23.019
Ecad MO PO	Partial Overlap	h1b7	14.211	827.318	30.381	4095	23.019
Ecad MO PO	Partial Overlap	h1b7	14.211	672.432	36.499	4095	23.019
Ecad MO PO	Partial Overlap	h1b7	14.211	510.937	56.861	4095	23.019
Ecad MO PO	Partial Overlap	h1b7	14.211	441.681	7.917	4095	23.019
Ecad MO PO	Partial Overlap	h1b7	13.995	1034.035	49.655	4095	22.667
Ecad MO PO	Partial Overlap	h1b7	13.995	823.658	46.352	4095	22.667
Ecad MO PO	Partial Overlap	h1b7	13.995	622.194	33.102	4015.882	22.667
Ecad MO PO	Partial Overlap	h1b7	13.995	501.503	24.736	4095	22.667
Ecad MO PO	Partial Overlap	h1b7	13.995	421.005	42.328	4095	22.667
Ecad MO PO	Partial Overlap	h2b1	7.781	1015.544	117.995	4020.529	12.564
Ecad MO PO	Partial Overlap	h2b1	7.781	1155.538	130.661	4095	12.564
Ecad MO PO	Partial Overlap	h2b1	7.781	1874.667	209.271	4095	12.564
Ecad MO PO	Partial Overlap	h2b1	7.781	1644.109	211.231	4095	12.564
Ecad MO PO	Partial Overlap	h2b1	7.781	1213.037	291.48	3954.714	12.564
Ecad MO PO	Partial Overlap	h2b1	7.781	761.781	154.742	3136.878	12.564
Ecad MO PO	Partial Overlap
Ecad MO PO	Partial Overlap	h2b2	8.375	581.613	5.634	3902.967	13.53
Ecad MO PO	Partial Overlap	h2b2	8.375	758.457	3.239	4095	13.53
Ecad MO PO	Partial Overlap	h2b2	8.375	701.155	46.999	3009.295	13.53
Ecad MO PO	Partial Overlap	h2b2	8.375	679.527	85.934	3345.441	13.53
Ecad MO PO	Partial Overlap	h2b2	8.375	564.82	116.834	4095	13.53
Ecad MO PO	Partial Overlap	h2b2	8.375	534.454	41.374	4095	13.53
Ecad MO PO	Partial Overlap	h2b2	8.375	567.702	26.071	3380.739	13.53
Ecad MO PO	Partial Overlap	h3b1	8.916	256.559	2.133	1666.639	14.409
Ecad MO PO	Partial Overlap	h3b1	8.916	456.996	0.29	4086.212	14.409
Ecad MO PO	Partial Overlap	h3b1	9.51	672.055	80.574	3592.733	15.342
Ecad MO PO	Partial Overlap	h3b1	9.51	706.951	77.41	3223.779	15.342
Ecad MO PO	Partial Overlap	h3b1	9.51	573.646	57.16	2147.896	15.342
Ecad MO PO	Partial Overlap
Ecad MO PO	Partial Overlap	h3b2	9.078	1043.327	83.369	3559.516	14.672
Ecad MO PO	Partial Overlap	h3b2	9.078	1231.492	82.976	4095	14.672
Ecad MO PO	Partial Overlap	h3b2	9.078	1363.112	94.493	4094.781	14.672
Ecad MO PO	Partial Overlap	h3b2	9.078	1195.018	121.727	4068.791	14.672
Ecad MO PO	Partial Overlap	h3b2	9.078	764.694	119.527	4078.528	14.672
Ecad MO PO	Partial Overlap	h3b2	9.078	343.371	28.232	3621.372	14.672
Ecad MO PO	Partial Overlap
Ecad MO PO	Partial Overlap	h3b3	11.077	526.159	22.273	3764.877	17.923
Ecad MO PO	Partial Overlap	h3b3	11.077	732.944	52.011	4048.657	17.923
Ecad MO PO	Partial Overlap	h3b3	11.077	783.435	31.263	4095	17.923
Ecad MO PO	Partial Overlap	h3b3	11.077	856.742	76.405	4095	17.923
Ecad MO PO	Partial Overlap	h3b3	11.077	833.206	16.034	4095	17.923
Ecad MO PO	Partial Overlap	h4b1	7.349	735.149	10.564	4095	11.861
Ecad MO PO	Partial Overlap	h4b1	7.349	857.125	99.797	4095	11.861
Ecad MO PO	Partial Overlap	h4b1	7.349	970.725	79.899	4085.515	11.861
Ecad MO PO	Partial Overlap	h4b1	7.349	1028.923	82.191	4091.565	11.861
Ecad MO PO	Partial Overlap	h4b1	7.349	886.251	21.295	4095	11.861
Ecad MO PO	Partial Overlap	h4b1	7.349	610.293	19.387	4095	11.861
Ecad MO PO	Partial Overlap
Ecad MO PO	Partial Overlap	h4b2	11.077	800.482	103.363	3592.469	17.923
Ecad MO PO	Partial Overlap	h4b2	11.077	992.453	112.793	4094.391	17.923
Ecad MO PO	Partial Overlap	h4b2	11.077	1133.076	113.606	4066.808	17.923
Ecad MO PO	Partial Overlap	h4b2	11.077	1183.658	118.086	4095	17.923
Ecad MO PO	Partial Overlap	h4b2	11.077	833.625	45.023	4095	17.923
Ecad MO PO	Partial Overlap	h4b2	11.077	565.858	19.668	4095	17.923
Ecad MO PO	Partial Overlap
Ecad MO PO	Partial Overlap	h4b3	11.833	530.458	17.246	3053.656	19.153
Ecad MO PO	Partial Overlap	h4b3	11.833	702.376	38.55	2975.375	19.153
Ecad MO PO	Partial Overlap	h4b3	11.833	800.275	69.988	3756.131	19.153
Ecad MO PO	Partial Overlap	h4b3	11.833	919.214	117.312	4032.437	19.153
Ecad MO PO	Partial Overlap	h4b3	11.833	1097.997	142.314	4077.688	19.153
Ecad MO PO	Partial Overlap	h4b3	11.833	1164.976	109.375	4002.29	19.153
Ecad MO PO	Partial Overlap	h4b3	11.833	975.6	35.021	4095	19.153
Ecad MO PO	Partial Overlap
Ecad MO PO	Partial Overlap	h4b4	7.511	526.084	21.015	2066.759	12.122
Ecad MO PO	Partial Overlap	h4b4	7.511	762.135	13.078	2748.45	12.122
Ecad MO PO	Partial Overlap	h4b4	7.511	906.483	76.356	3798.735	12.122
Ecad MO PO	Partial Overlap	h4b4	7.511	1042.146	72.261	3594.542	12.122
Ecad MO PO	Partial Overlap	h4b4	7.511	1188.178	105.378	3960.302	12.122
Ecad MO PO	Partial Overlap	h4b4	7.511	1294.282	106.787	4095	12.122
Ecad MO PO	Partial Overlap	h4b4	7.511	1106.415	69.89	4095	12.122
Ecad MO PO	Partial Overlap	h4b4	7.511	883.688	96.157	4063.921	12.122
Ecad MO PO	Partial Overlap	h4b4	7.511	863.678	108.614	4095	12.122
Ecad MO PO	Partial Overlap	h5b1	10.645	1148.868	110.367	4095	17.22
Ecad MO PO	Partial Overlap	h5b1	10.645	1278.419	138.908	4095	17.22
Ecad MO PO	Partial Overlap	h5b1	10.645	1379.757	155.57	4095	17.22
Ecad MO PO	Partial Overlap	h5b1	10.645	1433.132	84.832	4095	17.22
Ecad MO PO	Partial Overlap	h5b1	10.645	1443.645	108.323	4095	17.22
Ecad MO PO	Partial Overlap	h5b1	10.645	1310.899	91.84	4095	17.22
Ecad MO PO	Partial Overlap	h5b1	10.645	1077.744	97.598	4095	17.22
Ecad MO PO	Partial Overlap	h5b1	10.645	949.658	63.377	4031.435	17.22
Ecad MO PO	Partial Overlap
Ecad MO PO	Partial Overlap	h5b2	6.754	834.508	25.871	3970.717	10.894
Ecad MO PO	Partial Overlap	h5b2	6.754	946.402	50.617	4069.635	10.894
Ecad MO PO	Partial Overlap	h5b2	6.754	1086.135	129.679	4042.855	10.894
Ecad MO PO	Partial Overlap	h5b2	6.754	1631.753	165.113	4095	10.894
Ecad MO PO	Partial Overlap	h5b2	6.754	1809.372	172.16	4095	10.894
Ecad MO PO	Partial Overlap	h5b2	6.754	1818.27	172.76	4095	10.894
Ecad MO PO	Partial Overlap	h5b2	6.754	1505.582	204.8	3915.08	10.894
Ecad MO PO	Partial Overlap	h5b2	6.754	1217.802	153.592	4095	10.894
Ecad MO PO	Partial Overlap
Ecad MO PO	Partial Overlap	h5b3	7.295	625.569	41.288	3802.347	11.773
Ecad MO PO	Partial Overlap	h5b3	7.295	683.925	56.511	3440.841	11.773
Ecad MO PO	Partial Overlap	h5b3	7.295	934.902	72.154	4095	11.773
Ecad MO PO	Partial Overlap	h5b3	7.295	1012.28	109.802	4095	11.773
Ecad MO PO	Partial Overlap	h5b3	7.295	971.579	102.613	4095	11.773
Ecad MO PO	Partial Overlap	h5b3	7.295	744.317	53.459	4082.939	11.773
Ecad MO PO	Partial Overlap	h5b3	7.295	325.616	28.841	1953.22	11.773
Ecad MO PO	Partial Overlap	h6b1	6.214	823.776	152.776	3552.154	10.016
Ecad MO PO	Partial Overlap	h6b1	6.214	688.977	148.48	3335.793	10.016
Ecad MO PO	Partial Overlap	h6b1	6.214	588.327	156.105	2347.324	10.016
Ecad MO PO	Partial Overlap	h6b1	7.727	1787.562	312.053	4095	12.476
Ecad MO PO	Partial Overlap	h6b1	7.727	1733.848	387.628	4095	12.476
Ecad MO PO	Partial Overlap	h6b1	7.727	1439.217	290.008	4095	12.476
Ecad MO PO	Partial Overlap	h6b1	7.727	1117.202	170.273	4094.737	12.476
Ecad MO PO	Partial Overlap	h6b1	11.077	1217.676	167.862	4095	17.923
Ecad MO PO	Partial Overlap
Ecad MO PO	Partial Overlap	h6b2	6.268	1322.905	89.283	4095	10.104
Ecad MO PO	Partial Overlap	h6b2	6.268	1470.744	172.324	4095	10.104
Ecad MO PO	Partial Overlap	h6b2	6.268	1624.656	161.742	4095	10.104
Ecad MO PO	Partial Overlap	h6b2	6.268	1438.537	231.288	4093.841	10.104
Ecad MO PO	Partial Overlap	h6b2	6.268	870.179	136.746	2957.67	10.104
Ecad MO PO	Partial Overlap	h6b2	6.268	789.094	238.145	2526.029	10.104
Ecad MO PO	Partial Overlap	h6b2	6.268	770.434	209.101	3116.841	10.104
Ecad MO PO	Partial Overlap	h6b2	6.268	759.444	147.504	3660.9	10.104
Ecad MO PO	Partial Overlap	h7b1	8.645	487.165	33.331	1814.917	13.97
Ecad MO PO	Partial Overlap	h7b1	8.645	546.323	59.395	3243.911	13.97
Ecad MO PO	Partial Overlap	h7b1	8.645	556.987	96.33	3922.759	13.97
Ecad MO PO	Partial Overlap	h7b1	8.645	626.131	60.177	3387.091	13.97
Ecad MO PO	Partial Overlap	h7b1	8.645	701.971	122.638	3749.141	13.97
Ecad MO PO	Partial Overlap	h7b1	8.645	611.711	97.915	3104.612	13.97
Ecad MO PO	Partial Overlap	h7b1	8.645	676.622	77.462	4095	13.97
Ecad MO PO	Partial Overlap	h7b1	8.645	749.47	115.997	3887.433	13.97
Ecad MO PO	Partial Overlap
Ecad MO PO	Partial Overlap	h7b2	6.646	685.858	54.474	4095	10.719
Ecad MO PO	Partial Overlap	h7b2	6.646	760.133	61.516	4095	10.719
Ecad MO PO	Partial Overlap	h7b2	6.646	897.841	51.7	4095	10.719
Ecad MO PO	Partial Overlap	h7b2	6.646	937.668	63.298	4095	10.719
Ecad MO PO	Partial Overlap	h7b2	6.646	898.573	100.611	4095	10.719
Ecad MO PO	Partial Overlap	h7b2	6.646	691.127	57.151	3515.611	10.719
Ecad MO PO	Partial Overlap	h7b2	6.646	369.878	51.47	1527.471	10.719
Ecad MO PO	Partial Overlap	h7b2	6.646	193.44	31.768	895.011	10.719
Ecad MO NO	No Overlap	h1b8	9.618	1039.507	96.915	3167.765	15.551
Ecad MO NO	No Overlap	h1b8	9.618	1646.345	228.068	4095	15.551
Ecad MO NO	No Overlap	h1b8	9.618	1542.895	265.35	4095	15.551
Ecad MO NO	No Overlap	h1b8	9.618	1346.817	163.145	4095	15.551
Ecad MO NO	No Overlap	h1b8	9.618	1206.117	116.551	4095	15.551
Ecad MO NO	No Overlap	h1b8	9.618	1048.51	30.33	4095	15.551
Ecad MO NO	No Overlap	h1b8	9.348	1269.439	87.14	4095	15.112
Ecad MO NO	No Overlap	h1b8	9.348	1887.343	158.981	4095	15.112
Ecad MO NO	No Overlap	h1b8	9.348	1519.828	198.118	4095	15.112
Ecad MO NO	No Overlap	h1b8	9.348	1177.236	180.815	4095	15.112
Ecad MO NO	No Overlap	h1b8	9.348	784.403	41.981	4095	15.112
Ecad MO NO	No Overlap
Ecad MO NO	No Overlap	h1b9	12.806	1045.94	92.188	2853.329	20.735
Ecad MO NO	No Overlap	h1b9	12.806	1416.852	201.503	4095	20.735
Ecad MO NO	No Overlap	h1b9	12.806	1212.849	189.571	4095	20.735
Ecad MO NO	No Overlap	h1b9	12.806	1133.976	140.614	4095	20.735
Ecad MO NO	No Overlap	h1b9	12.806	1116.286	112.248	4095	20.735
Ecad MO NO	No Overlap	h1b9	12.806	1033.62	95.643	4095	20.735
Ecad MO NO	No Overlap	h1b9	12.806	855.984	70.512	4095	20.735
Ecad MO NO	No Overlap	h1b9	12.86	1335.963	91.508	4095	20.823
Ecad MO NO	No Overlap	h1b9	12.86	990.627	60.851	4095	20.823
Ecad MO NO	No Overlap	h1b9	12.86	791.976	20.616	4077.958	20.823
Ecad MO NO	No Overlap	h1b9	12.86	688.837	9.396	4095	20.823
Ecad MO NO	No Overlap	h1b9	12.86	546.641	1.668	4095	20.823
Ecad MO NO	No Overlap
Ecad MO NO	No Overlap	h1b10	8.916	912.586	34.1	2329.351	14.409
Ecad MO NO	No Overlap	h1b10	8.916	1336.221	35.369	4088.789	14.409
Ecad MO NO	No Overlap	h1b10	8.916	1198.272	129.961	4095	14.409
Ecad MO NO	No Overlap	h1b10	8.916	1101.842	100.345	4095	14.409
Ecad MO NO	No Overlap	h1b10	8.916	1058.282	73.246	4095	14.409
Ecad MO NO	No Overlap	h1b10	8.916	987.827	30.409	4095	14.409
Ecad MO NO	No Overlap	h1b10	8.916	958.187	57.109	3997.171	14.409
Ecad MO NO	No Overlap	h1b10	8.916	1088.412	58.455	3817.469	14.409
Ecad MO NO	No Overlap	h1b10	8.916	1051.997	37.136	4095	14.409
Ecad MO NO	No Overlap	h1b10	8.916	842.034	78.642	4093.354	14.409
Ecad MO NO	No Overlap	h1b10	8.916	609.484	70.839	3535.302	14.409
Ecad MO NO	No Overlap
Ecad MO NO	No Overlap	h1b11	9.24	955.182	46.122	2854.314	14.936
Ecad MO NO	No Overlap	h1b11	9.24	1273.137	17.55	4095	14.936
Ecad MO NO	No Overlap	h1b11	9.24	1093.687	84.343	4095	14.936
Ecad MO NO	No Overlap	h1b11	9.24	952.423	86.308	4095	14.936
Ecad MO NO	No Overlap	h1b11	9.24	894.595	63.686	4095	14.936
Ecad MO NO	No Overlap	h1b11	9.24	837.25	40.876	4095	14.936
Ecad MO NO	No Overlap	h1b11	9.24	1265.821	80.4	4095	14.936
Ecad MO NO	No Overlap	h1b11	9.24	958.981	48.422	4095	14.936
Ecad MO NO	No Overlap	h1b11	9.348	1648.875	130.083	4095	15.112
Ecad MO NO	No Overlap	h1b11	9.348	1417.241	162.3	4095	15.112
Ecad MO NO	No Overlap	h1b11	9.348	1151.278	117.002	4095	15.112
Ecad MO NO	No Overlap	h1b11	9.348	808.462	60.563	4095	15.112
Ecad MO NO	No Overlap	h1b11	9.348	546.61	62.407	3914.336	15.112
Ecad MO NO	No Overlap
Ecad MO NO	No Overlap	h1b12	10.591	1002.597	3.374	3027.785	17.132
Ecad MO NO	No Overlap	h1b12	10.591	1203.092	1.187	4095	17.132
Ecad MO NO	No Overlap	h1b12	10.591	767.595	24.101	4095	17.132
Ecad MO NO	No Overlap	h1b12	10.591	656.377	37.254	4095	17.132
Ecad MO NO	No Overlap	h1b12	10.591	618.109	6.675	4095	17.132
Ecad MO NO	No Overlap	h1b12	10.429	1084.296	43.782	4095	16.869
Ecad MO NO	No Overlap	h1b12	10.429	1121.045	40.324	4095	16.869
Ecad MO NO	No Overlap	h1b12	10.429	921.07	35.844	4063.972	16.869
Ecad MO NO	No Overlap	h1b12	10.429	805.455	51.69	4095	16.869
Ecad MO NO	No Overlap	h1b12	10.591	771.796	73.257	4095	17.132
Ecad MO NO	No Overlap	h2b3	15.508	449.079	16.217	1584.737	25.128
Ecad MO NO	No Overlap	h2b3	15.508	674.832	22.341	3171.245	25.128
Ecad MO NO	No Overlap	h2b3	15.508	781.794	35.359	3474.438	25.128
Ecad MO NO	No Overlap	h2b3	15.508	720.852	38.985	4095	25.128
Ecad MO NO	No Overlap	h2b3	15.508	755.375	13.203	4095	25.128
Ecad MO NO	No Overlap	h2b3	15.508	740.649	51.763	4045.867	25.128
Ecad MO NO	No Overlap	h2b3	15.508	674.863	29.057	3761.719	25.128
Ecad MO NO	No Overlap	h2b3	15.508	558.255	71.904	4094.677	25.128
Ecad MO NO	No Overlap
Ecad MO NO	No Overlap	h2b4	8.429	1123.752	43.659	4095	13.618
Ecad MO NO	No Overlap	h2b4	8.429	1153.587	64.365	4095	13.618
Ecad MO NO	No Overlap	h2b4	8.429	1650.666	109.916	4095	13.618
Ecad MO NO	No Overlap	h2b4	8.429	1579.936	59.68	4095	13.618
Ecad MO NO	No Overlap	h2b4	8.429	1295.206	96.144	4095	13.618
Ecad MO NO	No Overlap	h2b4	8.429	935.181	65.636	4095	13.618
Ecad MO NO	No Overlap	h2b4	8.429	617.712	22.261	4095	13.618
Ecad MO NO	No Overlap
Ecad MO NO	No Overlap	h2b5	6.322	1164.054	59.917	4095	10.192
Ecad MO NO	No Overlap	h2b5	6.322	1085.081	132.177	4095	10.192
Ecad MO NO	No Overlap	h2b5	6.322	1141.804	41.312	4095	10.192
Ecad MO NO	No Overlap	h2b5	6.322	987.806	85.926	4007.056	10.192
Ecad MO NO	No Overlap	h2b5	6.322	731.814	48.335	4094.438	10.192
Ecad MO NO	No Overlap	h2b5	6.322	454.294	58.348	2530.025	10.192
Ecad MO NO	No Overlap
Ecad MO NO	No Overlap	h2b6	12.158	927.635	79.984	2838.167	19.679
Ecad MO NO	No Overlap	h2b6	12.158	1103.852	132.026	3331.921	19.679
Ecad MO NO	No Overlap	h2b6	12.158	1124.348	175.672	3657.303	19.679
Ecad MO NO	No Overlap	h2b6	12.158	1237.454	225.504	4082.07	19.679
Ecad MO NO	No Overlap	h2b6	12.158	1073.692	220.99	4095	19.679
Ecad MO NO	No Overlap	h2b6	12.158	887.716	213.643	4095	19.679
Ecad MO NO	No Overlap	h2b6	12.158	703.886	128.431	4090.181	19.679
Ecad MO NO	No Overlap
Ecad MO NO	No Overlap	h2b7	7.078	624.747	19.482	2718.55	11.421
Ecad MO NO	No Overlap	h2b7	7.078	681.398	28.204	4095	11.421
Ecad MO NO	No Overlap	h2b7	7.078	707.127	31.035	4095	11.421
Ecad MO NO	No Overlap	h2b7	7.078	845.146	57.571	3947.719	11.421
Ecad MO NO	No Overlap	h2b7	7.078	713.62	48.073	3532.754	11.421
Ecad MO NO	No Overlap	h2b7	7.078	579.599	25.997	3979.779	11.421
Ecad MO NO	No Overlap	h2b7	7.078	461.777	49.295	4088.486	11.421
Ecad MO NO	No Overlap
Ecad MO NO	No Overlap	h2b8	7.024	637.076	86.881	2061.877	11.334
Ecad MO NO	No Overlap	h2b8	7.024	850.604	103.846	2312.904	11.334
Ecad MO NO	No Overlap	h2b8	7.024	1201.292	156.645	3699.899	11.334
Ecad MO NO	No Overlap	h2b8	7.024	1827.675	180.671	4095	11.334
Ecad MO NO	No Overlap	h2b8	7.024	1514.185	112.889	4095	11.334
Ecad MO NO	No Overlap	h2b8	7.024	1110.139	185.193	3844.471	11.334
Ecad MO NO	No Overlap	h2b8	7.024	698.304	80.262	2771.684	11.334
Ecad MO NO	No Overlap	h3b1	5.998	1330.079	204.634	4095	9.664
Ecad MO NO	No Overlap	h3b1	5.998	1159.879	172.597	4044.797	9.664
Ecad MO NO	No Overlap	h3b1	5.998	852.95	140.855	2477.016	9.664
Ecad MO NO	No Overlap	h3b1	6.16	1478.621	133.331	4095	9.928
Ecad MO NO	No Overlap	h3b1	6.16	1160.847	74.3	3885.077	9.928
Ecad MO NO	No Overlap	h3b1	6.16	975.465	64.487	3362.054	9.928
Ecad MO NO	No Overlap	h3b1	6.16	890.338	35.348	3993.542	9.928
Ecad MO NO	No Overlap
Ecad MO NO	No Overlap	h3b2	9.888	657.417	23.407	4095	15.99
Ecad MO NO	No Overlap	h3b2	9.888	696.297	33.373	4092.545	15.99
Ecad MO NO	No Overlap	h3b2	9.888	772.328	110.372	3321.512	15.99
Ecad MO NO	No Overlap	h3b2	9.888	949.581	95.329	3222.932	15.99
Ecad MO NO	No Overlap	h3b2	9.888	777.021	36.839	3695.773	15.99
Ecad MO NO	No Overlap
Ecad MO NO	No Overlap	h3b3	11.725	502.926	0	1804.699	18.977
Ecad MO NO	No Overlap	h3b3	11.725	579.446	0	1902.671	18.977
Ecad MO NO	No Overlap	h3b3	12.104	677.519	103.722	2310.622	19.583
Ecad MO NO	No Overlap	h3b3	12.104	805.373	137.912	4095	19.583
Ecad MO NO	No Overlap	h3b3	12.104	801.813	55.455	4095	19.583
Ecad MO NO	No Overlap	h3b3	12.104	816.869	20.758	4095	19.583
Ecad MO NO	No Overlap
Ecad MO NO	No Overlap	h3b4	10.429	741.669	65.176	4095	16.869
Ecad MO NO	No Overlap	h3b4	10.429	818.048	69.36	4095	16.869
Ecad MO NO	No Overlap	h3b4	10.429	814.114	75.87	4095	16.869
Ecad MO NO	No Overlap	h3b4	10.429	769.238	60.511	3931.922	16.869
Ecad MO NO	No Overlap	h3b4	11.563	905.615	133.109	3834.279	18.714
Ecad MO NO	No Overlap	h3b4	11.563	1164.671	155.024	4095	18.714
Ecad MO NO	No Overlap	h3b4	11.563	1116.117	193.305	4093.285	18.714
Ecad MO NO	No Overlap	h3b4	11.293	1110.787	65.976	3812.555	18.275
Ecad MO NO	No Overlap
Ecad MO NO	No Overlap	h3b5	7.565	1488.324	285.066	4095	12.212
Ecad MO NO	No Overlap	h3b5	7.565	1605.812	448.693	4094.637	12.212
Ecad MO NO	No Overlap	h3b5	7.565	1620.32	462.669	3705.412	12.212
Ecad MO NO	No Overlap	h3b5	7.565	1329.897	237.546	3430.658	12.212
Ecad MO NO	No Overlap	h3b5	7.565	824.164	106.268	4095	12.212
Ecad MO NO	No Overlap	h3b5	7.565	703.51	46.179	4095	12.212
Ecad MO NO	No Overlap	h4b5	8.051	733.641	45.125	3952.897	13.003
Ecad MO NO	No Overlap	h4b5	8.051	313.335	32.817	1607.048	13.003
Ecad MO NO	No Overlap	h4b5	8.051	733.641	45.125	3952.897	13.003
Ecad MO NO	No Overlap	h4b5	8.051	1066.164	42.659	4095	13.003
Ecad MO NO	No Overlap	h4b5	8.051	1027.684	122.581	4095	13.003
Ecad MO NO	No Overlap	h4b5	8.051	1123.229	129.76	4095	13.003
Ecad MO NO	No Overlap	h4b5	8.051	1203.237	143.821	4095	13.003
Ecad MO NO	No Overlap	h4b5	8.051	1308.336	196.525	4089.327	13.003
Ecad MO NO	No Overlap	h4b5	8.051	1342.303	178.065	4095	13.003
Ecad MO NO	No Overlap
Ecad MO NO	No Overlap	h4b6	9.834	344.18	0.075	1876.971	15.901
Ecad MO NO	No Overlap	h4b6	9.834	547.441	0.53	2389.855	15.901
Ecad MO NO	No Overlap	h4b6	9.834	511.192	3.526	2266.135	15.901
Ecad MO NO	No Overlap	h4b6	9.834	544.37	12.115	3656.116	15.901
Ecad MO NO	No Overlap	h4b6	9.834	604.929	15.462	4012.429	15.901
Ecad MO NO	No Overlap	h4b6	9.834	715.051	12.616	3131.665	15.901
Ecad MO NO	No Overlap
Ecad MO NO	No Overlap	h4b7	13.022	512.849	3.97	2308.332	21.086
Ecad MO NO	No Overlap	h4b7	13.022	761.042	19.516	4095	21.086
Ecad MO NO	No Overlap	h4b7	13.022	674.833	28.161	4095	21.086
Ecad MO NO	No Overlap	h4b7	13.022	639.188	29.948	4090.208	21.086
Ecad MO NO	No Overlap	h4b7	13.022	628.411	49.173	3909.903	21.086
Ecad MO NO	No Overlap	h4b7	13.022	649.287	47.816	4095	21.086
Ecad MO NO	No Overlap	h4b7	13.022	766.819	95.249	2666.72	21.086
Ecad MO NO	No Overlap
Ecad MO NO	No Overlap	h4b8	8.159	774.048	48.049	3162.369	13.179
Ecad MO NO	No Overlap	h4b8	8.159	933.176	123.725	4089.241	13.179
Ecad MO NO	No Overlap	h4b8	8.159	901.933	75.416	4095	13.179
Ecad MO NO	No Overlap	h4b8	8.159	760.082	65.576	4086.795	13.179
Ecad MO NO	No Overlap	h4b8	8.159	532.078	38.181	3739.558	13.179
Ecad MO NO	No Overlap	h4b8	8.159	417.773	29.647	2139.27	13.179
Ecad MO NO	No Overlap	h4b8	8.159	492.485	15.114	4001.993	13.179
Ecad MO NO	No Overlap	h4b8	8.159	517.666	5.198	4095	13.179
Ecad MO NO	No Overlap
Ecad MO NO	No Overlap	h4b9	12.86	715.191	60.376	2997.724	20.823
Ecad MO NO	No Overlap	h4b9	12.86	793.701	104.499	4038.679	20.823
Ecad MO NO	No Overlap	h4b9	12.86	848.827	85.012	4095	20.823
Ecad MO NO	No Overlap	h4b9	12.86	895.148	125.972	4032.167	20.823
Ecad MO NO	No Overlap	h4b9	12.86	933.433	157.734	4095	20.823
Ecad MO NO	No Overlap	h4b9	12.86	733.905	117.514	3681.236	20.823
Ecad MO NO	No Overlap
Ecad MO NO	No Overlap	h4b10	4.053	316.464	40.121	1136.283	6.502
Ecad MO NO	No Overlap	h4b10	4.053	728.707	63.71	4095	6.502
Ecad MO NO	No Overlap	h4b10	4.053	841.137	74.998	4095	6.502
Ecad MO NO	No Overlap	h4b10	4.053	893.881	102.736	4095	6.502
Ecad MO NO	No Overlap	h4b10	4.053	905.599	153.164	4093.007	6.502
Ecad MO NO	No Overlap	h4b10	4.053	704.188	131.793	2889.889	6.502
Ecad MO NO	No Overlap	h4b10	4.053	461.178	57.03	2238.26	6.502
Ecad MO NO	No Overlap	h5b1	9.348	769.368	88.251	2081.946	15.112
Ecad MO NO	No Overlap	h5b1	9.348	848.63	53.139	2986.73	15.112
Ecad MO NO	No Overlap	h5b1	9.348	1050.5	68.566	4021.349	15.112
Ecad MO NO	No Overlap	h5b1	9.348	1207.138	194.688	4095	15.112
Ecad MO NO	No Overlap	h5b1	9.348	1098.598	167.385	4095	15.112
Ecad MO NO	No Overlap	h5b1	9.348	922.808	140.245	4095	15.112
Ecad MO NO	No Overlap
Ecad MO NO	No Overlap	h5b2	5.836	797.783	73.351	3535.236	9.401
Ecad MO NO	No Overlap	h5b2	5.836	1053.658	186.857	4095	9.401
Ecad MO NO	No Overlap	h5b2	5.836	1297.216	192.226	4095	9.401
Ecad MO NO	No Overlap	h5b2	5.836	1503.885	293.507	4095	9.401
Ecad MO NO	No Overlap	h5b2	5.836	1680.044	279.089	4095	9.401
Ecad MO NO	No Overlap	h5b2	5.836	1655.279	207.291	4095	9.401
Ecad MO NO	No Overlap	h5b2	5.836	1405.456	131.259	4095	9.401
Ecad MO NO	No Overlap
Ecad MO NO	No Overlap	h5b3	8.537	1157.243	75.265	4095	13.794
Ecad MO NO	No Overlap	h5b3	8.537	1541.808	143.72	4095	13.794
Ecad MO NO	No Overlap	h5b3	8.537	2025.045	212.317	4095	13.794
Ecad MO NO	No Overlap	h5b3	8.537	2211.288	282.116	4095	13.794
Ecad MO NO	No Overlap	h5b3	8.537	2223.73	317.618	4095	13.794
Ecad MO NO	No Overlap	h5b3	8.537	1788.115	215.718	4095	13.794
Ecad MO NO	No Overlap	h5b3	8.537	843.22	100.052	3743.524	13.794
Ecad MO NO	No Overlap	h5b3	8.537	557.221	80.939	4032.842	13.794
Ecad MO NO	No Overlap
Ecad MO NO	No Overlap	h5b4	14.049	954.177	90.344	3743.343	22.755
Ecad MO NO	No Overlap	h5b4	14.049	1215.322	148.089	4091.736	22.755
Ecad MO NO	No Overlap	h5b4	14.049	1534.072	138.846	4095	22.755
Ecad MO NO	No Overlap	h5b4	14.049	1551.734	219.459	4095	22.755
Ecad MO NO	No Overlap	h5b4	14.049	1311.283	241.581	4095	22.755
Ecad MO NO	No Overlap	h5b4	14.049	976.186	164.792	4095	22.755
Ecad MO NO	No Overlap	h5b4	14.049	770.226	124.344	4095	22.755
Ecad MO NO	No Overlap
Ecad MO NO	No Overlap	h5b5	13.13	442.451	1.372	2719.921	21.262
Ecad MO NO	No Overlap	h5b5	13.13	441.794	18.113	3008.714	21.262
Ecad MO NO	No Overlap	h5b5	13.13	433.416	19.252	3682.595	21.262
Ecad MO NO	No Overlap	h5b5	13.13	489.828	34.512	3448.34	21.262
Ecad MO NO	No Overlap	h5b5	13.13	507.37	18.888	3461.104	21.262
Ecad MO NO	No Overlap	h5b5	13.13	474.119	40.351	3933.737	21.262
Ecad MO NO	No Overlap	h6b1	10.753	1461.707	60.192	4095	17.396
Ecad MO NO	No Overlap	h6b1	10.753	1543.18	68.462	4095	17.396
Ecad MO NO	No Overlap	h6b1	10.753	1730.288	117.314	4095	17.396
Ecad MO NO	No Overlap	h6b1	10.753	1939.004	144.212	4095	17.396
Ecad MO NO	No Overlap	h6b1	10.753	2038.274	50.065	4095	17.396
Ecad MO NO	No Overlap	h6b1	10.753	1896.024	129.058	4095	17.396
Ecad MO NO	No Overlap	h6b1	10.753	1406.399	142.679	4095	17.396
Ecad MO NO	No Overlap	h6b1	10.753	912.823	46.149	4095	17.396
Ecad MO NO	No Overlap
Ecad MO NO	No Overlap	h6b2	7.565	1441.955	193.275	4095	12.212
Ecad MO NO	No Overlap	h6b2	7.565	1569.277	347.112	4095	12.212
Ecad MO NO	No Overlap	h6b2	7.565	1503.107	277.871	4095	12.212
Ecad MO NO	No Overlap	h6b2	7.565	1130.289	148.59	4095	12.212
Ecad MO NO	No Overlap	h6b2	5.836	1218.346	140.465	3807.057	9.401
Ecad MO NO	No Overlap	h6b2	5.836	1071.31	102.788	3361.667	9.401
Ecad MO NO	No Overlap	h6b2	5.836	849.644	88.722	2551.13	9.401
Ecad MO NO	No Overlap
Ecad MO NO	No Overlap	h6b3	9.834	809.148	31.36	2897.535	15.902
Ecad MO NO	No Overlap	h6b3	9.834	912.872	49.543	3607.459	15.902
Ecad MO NO	No Overlap	h6b3	9.834	1011.386	42.579	4095	15.902
Ecad MO NO	No Overlap	h6b3	9.834	1194.901	148.02	4095	15.902
Ecad MO NO	No Overlap	h6b3	9.834	1351.66	156.336	4095	15.902
Ecad MO NO	No Overlap	h6b3	9.834	1330.118	153.254	4095	15.902
Ecad MO NO	No Overlap	h6b3	9.834	1202.661	116.057	4094.939	15.902
Ecad MO NO	No Overlap
Ecad MO NO	No Overlap	h6b4	6.754	830.768	73.772	4095	10.894
Ecad MO NO	No Overlap	h6b4	6.754	746.896	105.834	4095	10.894
Ecad MO NO	No Overlap	h6b4	6.754	762.538	133.794	4089.752	10.894
Ecad MO NO	No Overlap	h6b4	6.754	743.846	93.881	4095	10.894
Ecad MO NO	No Overlap	h6b4	6.754	648.891	51.162	4072.052	10.894
Ecad MO NO	No Overlap	h6b4	6.754	494.923	22.197	2014.058	10.894
Ecad MO NO	No Overlap	h7b1	10.753	657.971	64.794	3717.394	17.396
Ecad MO NO	No Overlap	h7b1	10.753	829.076	75.478	3820.136	17.396
Ecad MO NO	No Overlap	h7b1	10.753	1137.676	113.408	3926.954	17.396
Ecad MO NO	No Overlap	h7b1	10.753	1150.318	130.508	4095	17.396
Ecad MO NO	No Overlap	h7b1	10.753	986.188	84.255	4095	17.396
Ecad MO NO	No Overlap	h7b1	10.753	811.811	46.519	4095	17.396
Ecad MO NO	No Overlap	h7b1	10.753	584.713	26.554	4095	17.396
Ecad MO NO	No Overlap
Ecad MO NO	No Overlap	h7b2	11.023	636.998	31.695	4091.756	17.835
Ecad MO NO	No Overlap	h7b2	11.023	741.283	35.896	3944.556	17.835
Ecad MO NO	No Overlap	h7b2	11.023	784.684	28.38	4071.546	17.835
Ecad MO NO	No Overlap	h7b2	11.023	862.679	66.956	4095	17.835
Ecad MO NO	No Overlap	h7b2	11.023	830.222	80.429	3614.846	17.835
Ecad MO NO	No Overlap	h7b2	11.023	601.274	83.697	2691.466	17.835
Ecad MO NO	No Overlap	h7b2	11.023	438.115	47.095	4095	17.835
Ecad MO NO	No Overlap
Ecad MO NO	No Overlap	h7b3	8.808	479.275	30.759	1549.789	14.233
Ecad MO NO	No Overlap	h7b3	8.808	592.283	88.878	1897.414	14.233
Ecad MO NO	No Overlap	h7b3	8.808	611.919	93.03	2245.676	14.233
Ecad MO NO	No Overlap	h7b3	8.808	709.697	112.142	3080.124	14.233
Ecad MO NO	No Overlap	h7b3	8.808	818.307	74.489	3457.268	14.233
Ecad MO NO	No Overlap	h7b3	8.808	932.509	50.766	4095	14.233
Ecad MO NO	No Overlap	h7b3	8.808	940.069	99.624	4095	14.233
Ecad MO NO	No Overlap	h7b3	8.808	838.294	38.879	4095	14.233
Ecad MO NO	No Overlap	h7b3	8.808	731.848	18.998	3800.49	14.233
Ecad MO NO	No Overlap	h7b3	8.808	636.136	16.539	3803.713	14.233
Ecad MO NO	No Overlap
Ecad MO NO	No Overlap	h7b4	9.942	699.571	60.531	4061.035	16.078
Ecad MO NO	No Overlap	h7b4	9.942	769.645	43.882	4063.24	16.078
Ecad MO NO	No Overlap	h7b4	9.942	818.934	33.313	4086.256	16.078
Ecad MO NO	No Overlap	h7b4	9.942	1043.406	81.849	3805.631	16.078
Ecad MO NO	No Overlap	h7b4	9.942	1034.172	89.756	3919.936	16.078
Ecad MO NO	No Overlap	h7b4	9.942	863.967	85.323	4095	16.078
Ecad MO NO	No Overlap	h7b4	9.942	609.561	43.629	4095	16.078
Ecad MO NO	No Overlap	h7b4	9.942	334.788	23.067	4095	16.078
Ecad MO NO	No Overlap
Ecad MO NO	No Overlap	h7b5	7.727	329.469	3.136	1570.227	12.476
Ecad MO NO	No Overlap	h7b5	7.727	432.614	2.028	1505.26	12.476
Ecad MO NO	No Overlap	h7b5	7.727	461.453	20.832	2009.961	12.476
Ecad MO NO	No Overlap	h7b5	8.645	600.098	50.464	2059.874	13.969
Ecad MO NO	No Overlap	h7b5	8.645	725.025	50.546	2442.909	13.969
Ecad MO NO	No Overlap	h7b5	8.645	920.23	170.303	3982.127	13.969
Ecad MO NO	No Overlap	h7b5	8.645	612.06	41.9	2695.483	13.969
Ecad MO NO	No Overlap	h7b5	8.645	612.06	41.9	2695.483	13.969
Ecad MO NO	No Overlap	h7b5	8.645	418.427	16.36	2275.28	13.969
