# Supplementary material for: Stepwise polarisation of developing bilayered epidermis is mediated by aPKC and E-cadherin in zebrafish
Source: eLife. 2020 Jan 22;9:e49064. doi: 10.7554/eLife.49064 (PMC6975926; doi:10.7554/eLife.49064)
Supplement: Figure 4—source data 4. [file elife-49064-fig4-data4.csv]

Genotype	Boundary	Cell name	Area	Mean	Min	Max	Length
Ctrl MO C-C	Clone- Clone	h1b1	9.78	1355.419	127.892	4095	15.814
Ctrl MO C-C	Clone- Clone	h1b1	9.78	1147.816	172.496	4095	15.814
Ctrl MO C-C	Clone- Clone	h1b1	9.78	749.647	69.345	4095	15.814
Ctrl MO C-C	Clone- Clone	h1b1	9.78	506.07	15.524	2570.621	15.814
Ctrl MO C-C	Clone- Clone	h1b1	9.78	424.222	23.022	2793.873	15.814
Ctrl MO C-C	Clone- Clone	h1b1	9.78	323.465	25.026	2153.956	15.814
Ctrl MO C-C	Clone- Clone
Ctrl MO C-C	Clone- Clone	h1b2	11.023	1553.333	89.796	4095	17.835
Ctrl MO C-C	Clone- Clone	h1b2	11.023	1507.395	144.111	4095	17.835
Ctrl MO C-C	Clone- Clone	h1b2	11.023	1202.223	100.007	4095	17.835
Ctrl MO C-C	Clone- Clone	h1b2	11.023	915.822	47.006	4095	17.835
Ctrl MO C-C	Clone- Clone	h1b2	11.023	658.929	34.333	4095	17.835
Ctrl MO C-C	Clone- Clone	h1b2	11.023	499.457	12.063	4095	17.835
Ctrl MO C-C	Clone- Clone
Ctrl MO C-C	Clone- Clone	h1b3	8.645	1286.176	194.891	3913.452	13.969
Ctrl MO C-C	Clone- Clone	h1b3	8.645	881.544	222.116	3251.242	13.969
Ctrl MO C-C	Clone- Clone	h1b3	8.645	568.193	151.818	2485.28	13.969
Ctrl MO C-C	Clone- Clone	h1b3	8.645	359.912	57.804	1113.659	13.969
Ctrl MO C-C	Clone- Clone	h1b3	8.645	266.62	15.054	1038.002	13.969
Ctrl MO C-C	Clone- Clone
Ctrl MO C-C	Clone- Clone	h1b4	13.238	1333.398	158.761	4095	21.437
Ctrl MO C-C	Clone- Clone	h1b4	13.238	1349.051	86.308	4095	21.437
Ctrl MO C-C	Clone- Clone	h1b4	13.238	1056.778	152.136	4095	21.437
Ctrl MO C-C	Clone- Clone	h1b4	13.238	649.394	76.646	3130.527	21.437
Ctrl MO C-C	Clone- Clone	h1b4	13.238	423.323	41.969	3682.243	21.437
Ctrl MO C-C	Clone- Clone	h1b4	13.238	326.363	39.053	3848.346	21.437
Ctrl MO C-C	Clone- Clone	h2b1	10.158	1796.814	71.622	4095	16.429
Ctrl MO C-C	Clone- Clone	h2b1	10.158	2056.326	111.287	4095	16.429
Ctrl MO C-C	Clone- Clone	h2b1	10.158	2056.63	135.209	4095	16.429
Ctrl MO C-C	Clone- Clone	h2b1	10.158	1480.384	121.92	4095	16.429
Ctrl MO C-C	Clone- Clone
Ctrl MO C-C	Clone- Clone	h2b2	11.888	1264.855	107.234	4095	19.241
Ctrl MO C-C	Clone- Clone	h2b2	11.888	1293.166	122.564	4095	19.241
Ctrl MO C-C	Clone- Clone	h2b2	12.86	1810.885	186.508	4095	20.822
Ctrl MO C-C	Clone- Clone	h2b2	12.86	1281.133	95.463	4095	20.822
Ctrl MO C-C	Clone- Clone	h2b2	12.86	1080.059	102.229	4095	20.822
Ctrl MO C-C	Clone- Clone	h2b2	12.86	871.496	88.279	4095	20.822
Ctrl MO C-C	Clone- Clone
Ctrl MO C-C	Clone- Clone	h2b3	9.348	2256.572	304.14	4095	15.112
Ctrl MO C-C	Clone- Clone	h2b3	9.348	2440.89	302.053	4095	15.112
Ctrl MO C-C	Clone- Clone	h2b3	9.348	2073.143	383.059	4095	15.112
Ctrl MO C-C	Clone- Clone	h2b3	9.348	1799.448	238.834	4095	15.112
Ctrl MO C-C	Clone- Clone	h2b3	9.348	1440.67	190.639	4095	15.112
Ctrl MO C-C	Clone- Clone	h2b3	9.348	1022.345	105.782	4095	15.112
Ctrl MO C-C	Clone- Clone	h2b3	9.348	694.201	58.092	3488.407	15.112
Ctrl MO C-C	Clone- Clone
Ctrl MO C-C	Clone- Clone	h2b4	10.537	1276.84	127.996	4095	17.044
Ctrl MO C-C	Clone- Clone	h2b4	10.537	1388.934	144.441	4095	17.044
Ctrl MO C-C	Clone- Clone	h2b4	10.537	1471.252	234.202	4095	17.044
Ctrl MO C-C	Clone- Clone	h2b4	10.537	1388.24	146.612	4019.416	17.044
Ctrl MO C-C	Clone- Clone	h2b4	10.537	825.475	77.203	4095	17.044
Ctrl MO C-C	Clone- Clone	h2b4	10.537	662.883	73.572	4095	17.044
Ctrl MO C-C	Clone- Clone
Ctrl MO C-C	Clone- Clone	h2b5	5.782	1006.608	128.154	3980.509	9.313
Ctrl MO C-C	Clone- Clone	h2b5	5.782	475.695	86.39	1860.528	9.313
Ctrl MO C-C	Clone- Clone	h2b5	5.782	382.11	28.152	1496.943	9.313
Ctrl MO C-C	Clone- Clone	h2b5	5.782	334.838	33.231	1240.956	9.313
Ctrl MO C-C	Clone- Clone	h2b5	5.782	281.083	29.095	1037.292	9.313
Ctrl MO C-C	Clone- Clone	h3b1	5.782	1418.013	109.21	4095	9.313
Ctrl MO C-C	Clone- Clone	h3b1	5.782	1614.145	146.752	4095	9.313
Ctrl MO C-C	Clone- Clone	h3b1	5.782	1142.42	110.522	4095	9.313
Ctrl MO C-C	Clone- Clone	h3b1	5.782	843.329	101.628	4095	9.313
Ctrl MO C-C	Clone- Clone
Ctrl MO C-C	Clone- Clone	h3b2	8.105	1442.598	154.989	4095	13.091
Ctrl MO C-C	Clone- Clone	h3b2	8.105	1337.193	90.4	4095	13.091
Ctrl MO C-C	Clone- Clone	h3b2	8.105	1048.402	145.49	4095	13.091
Ctrl MO C-C	Clone- Clone	h3b2	8.105	819.537	135.666	3635.054	13.091
Ctrl MO C-C	Clone- Clone	h3b2	8.862	1087.18	135.66	4095	14.321
Ctrl MO C-C	Clone- Clone	h3b2	8.862	859.031	88.189	4095	14.321
Ctrl MO C-C	Clone- Clone	h3b2	8.862	665.729	55.773	4095	14.321
Ctrl MO C-C	Clone- Clone
Ctrl MO C-C	Clone- Clone	h3b3	9.996	1338.01	43.744	4095	16.166
Ctrl MO C-C	Clone- Clone	h3b3	9.996	890.098	104.334	4095	16.166
Ctrl MO C-C	Clone- Clone	h3b3	9.996	672.284	109.46	4095	16.166
Ctrl MO C-C	Clone- Clone	h3b3	9.996	577.712	91.261	4095	16.166
Ctrl MO C-C	Clone- Clone	h3b3	9.996	441.063	45.546	4095	16.166
Ctrl MO C-C	Clone- Clone
Ctrl MO C-C	Clone- Clone	h3b4	7.457	1668.468	134.432	4095	12.037
Ctrl MO C-C	Clone- Clone	h3b4	7.457	1265.485	89.252	4095	12.037
Ctrl MO C-C	Clone- Clone	h3b4	7.457	1006.816	125.014	4095	12.037
Ctrl MO C-C	Clone- Clone	h3b4	7.457	829.416	94.342	4095	12.037
Ctrl MO C-C	Clone- Clone	h3b4	7.457	709.664	16.038	4095	12.037
Ctrl MO C-C	Clone- Clone
Ctrl MO C-C	Clone- Clone	h3b5	11.888	1624.246	49.068	4095	19.241
Ctrl MO C-C	Clone- Clone	h3b5	11.888	1572.709	64.214	4095	19.241
Ctrl MO C-C	Clone- Clone	h3b5	11.888	1136.387	47.123	4095	19.241
Ctrl MO C-C	Clone- Clone	h3b5	11.888	807.399	60.98	3989.44	19.241
Ctrl MO C-C	Clone- Clone	h3b5	11.888	464.159	33.519	1912.234	19.241
Ctrl MO C-C	Clone- Clone	h4b1	11.671	1756.726	161.026	4095	18.89
Ctrl MO C-C	Clone- Clone	h4b1	11.671	1584.968	193.967	4095	18.89
Ctrl MO C-C	Clone- Clone	h4b1	11.671	1447.003	244.119	4095	18.89
Ctrl MO C-C	Clone- Clone	h4b1	11.671	1324.525	213.835	4095	18.89
Ctrl MO C-C	Clone- Clone	h4b1	11.671	1278.747	100.402	4095	18.89
Ctrl MO C-C	Clone- Clone	h4b1	11.671	1125.109	55.318	4095	18.89
Ctrl MO C-C	Clone- Clone
Ctrl MO C-C	Clone- Clone	h4b2	10.699	1961.275	203.35	4095	17.308
Ctrl MO C-C	Clone- Clone	h4b2	10.699	1609.084	147.158	4095	17.308
Ctrl MO C-C	Clone- Clone	h4b2	12.05	1752.484	120.707	4095	19.505
Ctrl MO C-C	Clone- Clone	h4b2	12.05	1317.225	180.909	4095	19.505
Ctrl MO C-C	Clone- Clone	h4b2	12.05	1090.955	49.693	4095	19.505
Ctrl MO C-C	Clone- Clone	h4b2	12.05	821.681	82.383	4095	19.505
Ctrl MO C-C	Clone- Clone	h4b2	12.05	534.481	40.048	4095	19.505
Ctrl MO C-C	Clone- Clone
Ctrl MO C-C	Clone- Clone	h4b3	11.617	2624.747	379.929	4095	18.789
Ctrl MO C-C	Clone- Clone	h4b3	11.617	2633.675	364.509	4095	18.789
Ctrl MO C-C	Clone- Clone	h4b3	11.617	2268.718	191.05	4095	18.789
Ctrl MO C-C	Clone- Clone	h4b3	11.617	1472.669	143.332	4095	18.789
Ctrl MO C-C	Clone- Clone	h4b3	11.617	1114.102	102.457	4094.826	18.789
Ctrl MO C-C	Clone- Clone	h4b3	11.617	942.33	75.519	4095	18.789
Ctrl MO C-C	Clone- Clone
Ctrl MO C-C	Clone- Clone	h4b4	7.619	2606.621	304.86	4095	12.3
Ctrl MO C-C	Clone- Clone	h4b4	7.619	1902.688	395.331	4095	12.3
Ctrl MO C-C	Clone- Clone	h4b4	7.619	1385.085	400.101	4095	12.3
Ctrl MO C-C	Clone- Clone	h4b4	7.619	941.962	289.872	3876.109	12.3
Ctrl MO C-C	Clone- Clone	h4b4	7.619	628.921	91.91	2177.414	12.3
Ctrl MO C-C	Clone- Clone	h4b4	7.619	407.985	32.313	3287.054	12.3
Ctrl MO C-C	Clone- Clone
Ctrl MO C-C	Clone- Clone	h4b5	7.024	2344.196	213.936	4095	11.334
Ctrl MO C-C	Clone- Clone	h4b5	7.024	1597.517	369.951	4095	11.334
Ctrl MO C-C	Clone- Clone	h4b5	7.024	1179.527	261.65	3683.119	11.334
Ctrl MO C-C	Clone- Clone	h4b5	7.024	895.572	230.682	3484.048	11.334
Ctrl MO C-C	Clone- Clone	h4b5	7.024	753.128	177.574	4095	11.334
Ctrl MO C-C	Clone- Clone	h5b1	6.808	1942.575	267.306	4095	10.978
Ctrl MO C-C	Clone- Clone	h5b1	6.808	1813.271	200.41	4095	10.978
Ctrl MO C-C	Clone- Clone	h5b1	6.808	1124.437	193.041	3497.726	10.978
Ctrl MO C-C	Clone- Clone	h5b1	6.808	565.569	209.202	1631.054	10.978
Ctrl MO C-C	Clone- Clone	h5b1	6.808	405.06	142.353	1603.149	10.978
Ctrl MO C-C	Clone- Clone
Ctrl MO C-C	Clone- Clone	h5b2	10.699	1863.93	392.058	4095	17.308
Ctrl MO C-C	Clone- Clone	h5b2	10.699	2382.414	322.206	4095	17.308
Ctrl MO C-C	Clone- Clone	h5b2	10.699	2275.676	223.79	4095	17.308
Ctrl MO C-C	Clone- Clone	h5b2	10.699	1501.224	166.602	4095	17.308
Ctrl MO C-C	Clone- Clone	h5b2	10.699	1030.734	138.15	4095	17.308
Ctrl MO C-C	Clone- Clone	h5b2	10.699	648.531	84.177	2643.894	17.308
Ctrl MO C-C	Clone- Clone
Ctrl MO C-C	Clone- Clone	h5b3	6.808	1918.921	301.91	4095	10.982
Ctrl MO C-C	Clone- Clone	h5b3	6.808	1496.834	317.72	4095	10.982
Ctrl MO C-C	Clone- Clone	h5b3	6.808	1129.406	180.822	4095	10.982
Ctrl MO C-C	Clone- Clone	h5b3	6.808	579.904	54.093	4095	10.982
Ctrl MO C-C	Clone- Clone	h5b3	6.808	447.628	38.648	4095	10.982
Ctrl MO C-C	Clone- Clone	h5b3	6.808	352.643	16.787	3233.977	10.982
Ctrl MO C-C	Clone- Clone
Ctrl MO C-C	Clone- Clone	h5b4	9.726	2006.559	252.31	4095	15.727
Ctrl MO C-C	Clone- Clone	h5b4	9.726	2065.066	148.857	4095	15.727
Ctrl MO C-C	Clone- Clone	h5b4	9.726	1835.596	177.721	4095	15.727
Ctrl MO C-C	Clone- Clone	h5b4	9.726	1113.241	140.74	3621.168	15.727
Ctrl MO C-C	Clone- Clone	h5b4	9.726	804.86	148.851	3308.1	15.727
Ctrl MO C-C	Clone- Clone	h5b4	9.726	634.517	156.115	2848.853	15.727
Ctrl MO C-C	Clone- Clone	h5b4	9.726	532.541	130.533	1919.84	15.727
Ctrl MO C-C	Clone- Clone
Ctrl MO C-C	Clone- Clone	h5b5	11.293	1959.821	244.469	4095	18.275
Ctrl MO C-C	Clone- Clone	h5b5	11.293	1691.299	258.212	4095	18.275
Ctrl MO C-C	Clone- Clone	h5b5	11.725	1406.825	182.775	4095	18.977
Ctrl MO C-C	Clone- Clone	h5b5	11.725	1072.37	221.907	4095	18.977
Ctrl MO C-C	Clone- Clone	h5b5	11.725	834.609	143.845	3124.482	18.977
Ctrl MO C-C	Clone- Clone	h5b5	11.725	593.967	119.897	3193.868	18.977
Ctrl MO C-C	Clone- Clone
Ctrl MO C-C	Clone- Clone	h5b6	10.05	2217.299	533.283	4095	16.254
Ctrl MO C-C	Clone- Clone	h5b6	10.05	2371.034	293.854	4095	16.254
Ctrl MO C-C	Clone- Clone	h5b6	10.05	2090.664	182.138	4095	16.254
Ctrl MO C-C	Clone- Clone	h5b6	10.05	1675.733	145.082	4093.472	16.254
Ctrl MO C-C	Clone- Clone	h5b6	10.05	1335.184	164.409	3298.458	16.254
Ctrl MO C-C	Clone- Clone	h5b6	10.05	1011.202	115.574	2796.024	16.254
Ctrl MO C-C	Clone- Clone
Ctrl MO C-C	Clone- Clone	h5b7	9.942	2009.21	259.023	4095	16.078
Ctrl MO C-C	Clone- Clone	h5b7	9.942	2151.701	338.282	4095	16.078
Ctrl MO C-C	Clone- Clone	h5b7	9.942	1880.04	266.065	4095	16.078
Ctrl MO C-C	Clone- Clone	h5b7	9.942	1172.28	151.391	4069.202	16.078
Ctrl MO C-C	Clone- Clone	h5b7	9.942	797.591	173.237	2641.058	16.078
Ctrl MO C-C	Clone- Clone	h5b7	9.942	537.756	142.706	2097.655	16.078
Ctrl MO C-C	Clone- Clone	h5b7	9.942	282.831	24.898	1011.32	16.078
Ctrl MO C-C	Clone- Clone
Ctrl MO C-C	Clone- Clone	h5b8	7.511	1682.301	370.917	4095	12.124
Ctrl MO C-C	Clone- Clone	h5b8	7.511	1607.686	401.158	4095	12.124
Ctrl MO C-C	Clone- Clone	h5b8	7.511	1500.022	407.753	4095	12.124
Ctrl MO C-C	Clone- Clone	h5b8	7.511	1415.395	422.073	4091.027	12.124
Ctrl MO C-C	Clone- Clone	h5b8	7.511	1363.699	383.2	4095	12.124
Ctrl MO C-C	Clone- Clone
Ctrl MO C-C	Clone- Clone	h5b9	9.942	1156.491	143.789	4095	16.078
Ctrl MO C-C	Clone- Clone	h5b9	9.942	1256.208	132.717	4095	16.078
Ctrl MO C-C	Clone- Clone	h5b9	9.078	1192.786	101.987	4095	14.672
Ctrl MO C-C	Clone- Clone	h5b9	9.078	1032.504	120.713	4095	14.672
Ctrl MO C-C	Clone- Clone	h5b9	9.078	747.032	74.239	3325.333	14.672
Ctrl MO C-C	Clone- Clone	h5b9	9.078	511.489	76.229	2629.491	14.672
Ctrl MO C-C	Clone- Clone	h5b9	9.078	456.351	64.521	2129.106	14.672
Ctrl MO C-C	Clone- Clone
Ctrl MO C-C	Clone- Clone	h5b10	6.484	1032.296	181.671	3280.514	10.455
Ctrl MO C-C	Clone- Clone	h5b10	6.484	1046.454	259.698	2791.831	10.455
Ctrl MO C-C	Clone- Clone	h5b10	6.484	1044.516	286.556	2746.86	10.455
Ctrl MO C-C	Clone- Clone	h5b10	6.484	1027.532	272.417	3060.684	10.455
Ctrl MO C-C	Clone- Clone	h5b10	6.484	1012.803	273.816	2863.356	10.455
Ctrl MO C-C	Clone- Clone	h5b10	6.484	1034.88	101.025	3980.296	10.455
Ctrl MO C-C	Clone- Clone	h5b10	6.484	909.622	59.7	3050.792	10.455
Ctrl MO C-C	Clone- Clone
Ctrl MO C-C	Clone- Clone	h5b11	11.239	1985.956	196.878	4095	18.187
Ctrl MO C-C	Clone- Clone	h5b11	11.239	1913.772	292.897	4095	18.187
Ctrl MO C-C	Clone- Clone	h5b11	11.239	1548.413	241.509	4095	18.187
Ctrl MO C-C	Clone- Clone	h5b11	11.239	1125.012	169.527	4095	18.187
Ctrl MO C-C	Clone- Clone	h5b11	11.239	959.652	129.491	3881.814	18.187
Ctrl MO C-C	Clone- Clone	h5b11	11.239	847.263	167.065	2928.783	18.187
Ctrl MO C-C	Clone- Clone	h5b11	11.239	766.159	119.734	3697.642	18.187
Ctrl MO C-C	Clone- Clone
Ctrl MO C-C	Clone- Clone	h5b12	7.349	2016.407	320.628	4095	11.861
Ctrl MO C-C	Clone- Clone	h5b12	7.349	2064.983	296.946	4095	11.861
Ctrl MO C-C	Clone- Clone	h5b12	7.349	1425.011	186.328	4027.913	11.861
Ctrl MO C-C	Clone- Clone	h5b12	7.349	707.537	248.412	2165.243	11.861
Ctrl MO C-C	Clone- Clone	h5b12	7.349	489.484	83.973	1705.222	11.861
Ctrl MO C-C	Clone- Clone	h5b12	7.349	304.715	75.783	842.284	11.861
Ctrl MO C-C	Clone- Clone
Ctrl MO C-C	Clone- Clone	h5b13	8.754	1417.494	196.346	4095	14.145
Ctrl MO C-C	Clone- Clone	h5b13	8.754	1269.867	112.649	4095	14.145
Ctrl MO C-C	Clone- Clone	h5b13	8.754	995.577	162.897	3791.058	14.145
Ctrl MO C-C	Clone- Clone	h5b13	8.754	787.985	130.444	4081.645	14.145
Ctrl MO C-C	Clone- Clone	h5b13	8.754	632.648	57.275	4030.796	14.145
Ctrl MO C-C	Clone- Clone	h5b13	8.754	502.579	33.857	1992.951	14.145
Ctrl MO C-C	Clone- Clone
Ctrl MO C-C	Clone- Clone	h5b14	3.242	1841.202	195.531	4095	5.184
Ctrl MO C-C	Clone- Clone	h5b14	3.242	2714.602	260.782	4095	5.184
Ctrl MO C-C	Clone- Clone	h5b14	3.242	2096.462	314.561	4095	5.184
Ctrl MO C-C	Clone- Clone	h5b14	3.242	765.673	186.473	2210.091	5.184
Ctrl MO C-C	Clone- Clone	h5b14	3.242	451.215	176.095	1833.758	5.184
Ctrl MO C-C	Clone- Clone	h6b1	9.78	1499.317	121.758	4095	15.815
Ctrl MO C-C	Clone- Clone	h6b1	9.78	1657.052	163.78	4095	15.815
Ctrl MO C-C	Clone- Clone	h6b1	9.78	1573.397	184.932	4095	15.815
Ctrl MO C-C	Clone- Clone	h6b1	9.78	1027.757	201.165	2901.378	15.815
Ctrl MO C-C	Clone- Clone	h6b1	9.78	569.73	102.754	2249.896	15.815
Ctrl MO C-C	Clone- Clone	h6b1	9.78	416.838	50.571	2215.675	15.815
Ctrl MO C-C	Clone- Clone	h6b1	9.78	337.41	35.89	1803.657	15.815
Ctrl MO C-C	Clone- Clone
Ctrl MO C-C	Clone- Clone	h6b2	7.078	1425.79	136.616	4095	11.422
Ctrl MO C-C	Clone- Clone	h6b2	7.078	1387.509	271.406	4095	11.422
Ctrl MO C-C	Clone- Clone	h6b2	7.078	1335.315	266.018	4095	11.422
Ctrl MO C-C	Clone- Clone	h6b2	7.078	1240.185	198.003	4095	11.422
Ctrl MO C-C	Clone- Clone	h6b2	7.078	897.965	108.712	3350.183	11.422
Ctrl MO C-C	Clone- Clone	h6b2	7.078	558.969	53.813	3087.283	11.422
Ctrl MO C-C	Clone- Clone	h6b2	7.078	483.152	26.486	1587.837	11.422
Ctrl MO C-C	Clone- Clone	h7b1	7.997	3120.095	561.451	4095	12.915
Ctrl MO C-C	Clone- Clone	h7b1	7.997	3165.472	515.328	4095	12.915
Ctrl MO C-C	Clone- Clone	h7b1	7.997	2547.892	430.078	4095	12.915
Ctrl MO C-C	Clone- Clone	h7b1	7.997	1511.363	243.603	4095	12.915
Ctrl MO C-C	Clone- Clone	h7b1	7.997	1052.634	147.014	3934.065	12.915
Ctrl MO C-C	Clone- Clone	h7b1	7.997	728.337	118.171	4031.575	12.915
Ctrl MO C-C	Clone- Clone	h7b1	7.997	595.593	96.262	4095	12.915
Ctrl MO C-C	Clone- Clone
Ctrl MO C-C	Clone- Clone	h7b2	15.4	2201.493	170.367	4095	24.952
Ctrl MO C-C	Clone- Clone	h7b2	15.4	1877.079	244.069	4095	24.952
Ctrl MO C-C	Clone- Clone	h7b2	15.4	1614.256	167.818	4095	24.952
Ctrl MO C-C	Clone- Clone	h7b2	15.4	1207.466	112.492	4095	24.952
Ctrl MO C-C	Clone- Clone	h7b2	15.4	679.64	74.347	4095	24.952
Ctrl MO C-C	Clone- Clone	h7b2	15.4	372.032	15.876	4095	24.952
Ctrl MO C-C	Clone- Clone	h7b2	15.4	314.55	20.251	4060.896	24.952
Ctrl MO C-C	Clone- Clone	h7b2	15.4	271.862	26.321	2136.647	24.952
Ctrl MO NC-C	Non Clone- Clone	h1b1	8.051	1016.694	181.324	3604.595	13.003
Ctrl MO NC-C	Non Clone- Clone	h1b1	8.051	1013.113	121.251	4093.249	13.003
Ctrl MO NC-C	Non Clone- Clone	h1b1	8.051	969.421	59.505	4095	13.003
Ctrl MO NC-C	Non Clone- Clone	h1b1	8.051	690.014	94.808	3654.467	13.003
Ctrl MO NC-C	Non Clone- Clone	h1b1	8.051	421.758	38.717	2679.564	13.003
Ctrl MO NC-C	Non Clone- Clone
Ctrl MO NC-C	Non Clone- Clone	h1b2	5.674	1439.781	273.99	3662.646	9.137
Ctrl MO NC-C	Non Clone- Clone	h1b2	5.674	1102.045	241.469	3704.078	9.137
Ctrl MO NC-C	Non Clone- Clone	h1b2	5.674	617.906	153.212	2627.335	9.137
Ctrl MO NC-C	Non Clone- Clone	h1b2	5.674	306.424	33.721	936.191	9.137
Ctrl MO NC-C	Non Clone- Clone	h1b2	5.674	164.961	26.334	1187.031	9.137
Ctrl MO NC-C	Non Clone- Clone
Ctrl MO NC-C	Non Clone- Clone	h1b3	8.267	1427.635	206.293	4095	13.354
Ctrl MO NC-C	Non Clone- Clone	h1b3	8.267	1360.38	250.276	4095	13.354
Ctrl MO NC-C	Non Clone- Clone	h1b3	8.267	1046.032	296.525	3455.368	13.354
Ctrl MO NC-C	Non Clone- Clone	h1b3	8.267	678.21	168.999	2364.732	13.354
Ctrl MO NC-C	Non Clone- Clone	h1b3	8.267	476.302	84.609	1471.008	13.354
Ctrl MO NC-C	Non Clone- Clone	h1b3	8.267	397.237	31.281	2694.686	13.354
Ctrl MO NC-C	Non Clone- Clone
Ctrl MO NC-C	Non Clone- Clone	h1b4	9.888	1323.214	240.716	4095	15.99
Ctrl MO NC-C	Non Clone- Clone	h1b4	9.888	1152.438	175.023	4095	15.99
Ctrl MO NC-C	Non Clone- Clone	h1b4	9.888	834.91	133.075	3820.487	15.99
Ctrl MO NC-C	Non Clone- Clone	h1b4	9.888	642.489	99.995	2832.245	15.99
Ctrl MO NC-C	Non Clone- Clone	h1b4	9.888	415.573	91.88	2003.1	15.99
Ctrl MO NC-C	Non Clone- Clone
Ctrl MO NC-C	Non Clone- Clone	h1b5	4.863	1060.553	48.693	4095	7.819
Ctrl MO NC-C	Non Clone- Clone	h1b5	4.863	842.769	99.053	3421.923	7.819
Ctrl MO NC-C	Non Clone- Clone	h1b5	4.863	471.76	33.506	2180.595	7.819
Ctrl MO NC-C	Non Clone- Clone	h1b5	4.863	288.321	39.136	1201.698	7.819
Ctrl MO NC-C	Non Clone- Clone
Ctrl MO NC-C	Non Clone- Clone	h1b6	6.862	929.474	37.585	4095	11.07
Ctrl MO NC-C	Non Clone- Clone	h1b6	6.862	761.688	51.928	3876.988	11.07
Ctrl MO NC-C	Non Clone- Clone	h1b6	6.862	487.357	22.877	2441.612	11.07
Ctrl MO NC-C	Non Clone- Clone	h1b6	7.457	1215.844	154.228	4017.173	12.037
Ctrl MO NC-C	Non Clone- Clone	h1b6	7.457	965.875	110.611	4060.134	12.037
Ctrl MO NC-C	Non Clone- Clone	h1b6	7.457	618.314	87.022	2731.123	12.037
Ctrl MO NC-C	Non Clone- Clone	h2b1	9.726	1871.864	190.158	4095	15.723
Ctrl MO NC-C	Non Clone- Clone	h2b1	9.726	1442.38	127.842	4095	15.723
Ctrl MO NC-C	Non Clone- Clone	h2b1	9.726	880.997	56.993	3980.024	15.723
Ctrl MO NC-C	Non Clone- Clone	h2b1	9.726	624.229	93.477	4095	15.723
Ctrl MO NC-C	Non Clone- Clone	h2b1	9.726	534.1	35.797	4095	15.723
Ctrl MO NC-C	Non Clone- Clone
Ctrl MO NC-C	Non Clone- Clone	h2b2	16.48	2017.453	103.217	4095	26.709
Ctrl MO NC-C	Non Clone- Clone	h2b2	16.48	1800.638	142.827	4095	26.709
Ctrl MO NC-C	Non Clone- Clone	h2b2	16.48	1063.717	113.15	4095	26.709
Ctrl MO NC-C	Non Clone- Clone	h2b2	16.48	622.32	101.307	3118.867	26.709
Ctrl MO NC-C	Non Clone- Clone	h2b2	16.48	466.572	59.379	2662.063	26.709
Ctrl MO NC-C	Non Clone- Clone
Ctrl MO NC-C	Non Clone- Clone	h2b3	7.457	1230.201	213.286	4095	12.037
Ctrl MO NC-C	Non Clone- Clone	h2b3	7.457	1790.272	208.291	4095	12.037
Ctrl MO NC-C	Non Clone- Clone	h2b3	7.457	1940.385	235.902	4095	12.037
Ctrl MO NC-C	Non Clone- Clone	h2b3	7.457	1705.555	193.18	4095	12.037
Ctrl MO NC-C	Non Clone- Clone	h2b3	7.457	1482.301	158.566	4095	12.037
Ctrl MO NC-C	Non Clone- Clone
Ctrl MO NC-C	Non Clone- Clone	h2b4	6.376	1536.7	184.143	4095	10.279
Ctrl MO NC-C	Non Clone- Clone	h2b4	6.376	1795.769	354.043	4095	10.279
Ctrl MO NC-C	Non Clone- Clone	h2b4	6.376	1693.571	213.011	4095	10.279
Ctrl MO NC-C	Non Clone- Clone	h2b4	6.376	1508.171	240.658	4074.864	10.279
Ctrl MO NC-C	Non Clone- Clone	h2b4	6.376	1133.292	155.968	3439.547	10.279
Ctrl MO NC-C	Non Clone- Clone	h2b4	6.376	754.637	164.402	3014.869	10.279
Ctrl MO NC-C	Non Clone- Clone
Ctrl MO NC-C	Non Clone- Clone	h2b5	11.185	418.886	44.555	2358.516	18.099
Ctrl MO NC-C	Non Clone- Clone	h2b5	11.185	666.706	39.972	3841.135	18.099
Ctrl MO NC-C	Non Clone- Clone	h2b5	11.185	1239.995	65.104	4095	18.099
Ctrl MO NC-C	Non Clone- Clone	h2b5	11.185	1370.204	196.739	4095	18.099
Ctrl MO NC-C	Non Clone- Clone	h2b5	11.185	1218.765	164.48	4056.065	18.099
Ctrl MO NC-C	Non Clone- Clone	h2b5	11.185	960.704	179.355	3700.827	18.099
Ctrl MO NC-C	Non Clone- Clone	h2b5	11.185	749.943	115.245	4095	18.099
Ctrl MO NC-C	Non Clone- Clone
Ctrl MO NC-C	Non Clone- Clone	h2b6	6.808	1707.337	74.617	4095	10.982
Ctrl MO NC-C	Non Clone- Clone	h2b6	6.808	1606.95	201.007	4069.276	10.982
Ctrl MO NC-C	Non Clone- Clone	h2b6	6.808	812.546	192.369	2307.26	10.982
Ctrl MO NC-C	Non Clone- Clone	h2b6	6.808	553.082	109.135	1192.46	10.982
Ctrl MO NC-C	Non Clone- Clone
Ctrl MO NC-C	Non Clone- Clone	h2b7	10.212	1138.673	110.503	4095	16.517
Ctrl MO NC-C	Non Clone- Clone	h2b7	10.212	1139.458	101.294	4095	16.517
Ctrl MO NC-C	Non Clone- Clone	h2b7	11.725	2141.467	158.875	4095	18.978
Ctrl MO NC-C	Non Clone- Clone	h2b7	11.725	2092.092	113.793	4095	18.978
Ctrl MO NC-C	Non Clone- Clone	h2b7	11.725	1847.362	54.689	4095	18.978
Ctrl MO NC-C	Non Clone- Clone	h2b7	11.725	1287.124	5.959	4095	18.978
Ctrl MO NC-C	Non Clone- Clone	h2b7	11.725	602.4	1.208	4095	18.978
Ctrl MO NC-C	Non Clone- Clone
Ctrl MO NC-C	Non Clone- Clone	h2b8	8.375	1202.863	52.391	4044.991	13.53
Ctrl MO NC-C	Non Clone- Clone	h2b8	8.375	1178.948	17.085	4095	13.53
Ctrl MO NC-C	Non Clone- Clone	h2b8	8.375	1077.308	17.374	4095	13.53
Ctrl MO NC-C	Non Clone- Clone	h2b8	8.375	962.61	8.125	4095	13.53
Ctrl MO NC-C	Non Clone- Clone
Ctrl MO NC-C	Non Clone- Clone	h2b9	10.375	868.1	34.351	4095	16.781
Ctrl MO NC-C	Non Clone- Clone	h2b9	10.375	795.21	35.842	4009.122	16.781
Ctrl MO NC-C	Non Clone- Clone	h2b9	10.375	552.902	33.881	4083.012	16.781
Ctrl MO NC-C	Non Clone- Clone	h2b9	10.375	312.926	17.694	1625.621	16.781
Ctrl MO NC-C	Non Clone- Clone	h2b9	10.375	262.301	8.769	2599.162	16.781
Ctrl MO NC-C	Non Clone- Clone	h3b1	5.836	851.608	10.306	3873.639	9.401
Ctrl MO NC-C	Non Clone- Clone	h3b1	5.836	560.441	29.384	3106.434	9.401
Ctrl MO NC-C	Non Clone- Clone	h3b1	5.836	418.514	46.354	3165.467	9.401
Ctrl MO NC-C	Non Clone- Clone	h3b1	5.836	282.925	32.438	2172.333	9.401
Ctrl MO NC-C	Non Clone- Clone	h3b1	5.836	206.355	19.06	1361.403	9.401
Ctrl MO NC-C	Non Clone- Clone
Ctrl MO NC-C	Non Clone- Clone	h3b2	7.781	958.591	59.526	4095	12.564
Ctrl MO NC-C	Non Clone- Clone	h3b2	7.781	723.39	71.129	4053.458	12.564
Ctrl MO NC-C	Non Clone- Clone	h3b2	7.781	597.827	44.004	4092.706	12.564
Ctrl MO NC-C	Non Clone- Clone	h3b2	7.781	457.389	32.666	4013.891	12.564
Ctrl MO NC-C	Non Clone- Clone	h3b2	7.781	310.325	13.122	1991.927	12.564
Ctrl MO NC-C	Non Clone- Clone
Ctrl MO NC-C	Non Clone- Clone	h3b3	5.403	606.929	78.317	3865.465	8.698
Ctrl MO NC-C	Non Clone- Clone	h3b3	5.403	501.002	98.36	1866.726	8.698
Ctrl MO NC-C	Non Clone- Clone	h3b3	5.403	564.823	47.272	2870.241	8.698
Ctrl MO NC-C	Non Clone- Clone	h3b3	5.403	512.218	41.305	2143.739	8.698
Ctrl MO NC-C	Non Clone- Clone
Ctrl MO NC-C	Non Clone- Clone	h3b4	13.779	1116.77	151.968	4095	22.316
Ctrl MO NC-C	Non Clone- Clone	h3b4	13.779	628.37	49.773	3748.998	22.316
Ctrl MO NC-C	Non Clone- Clone	h3b4	13.779	480.912	46.423	4095	22.316
Ctrl MO NC-C	Non Clone- Clone	h3b4	13.779	400.332	21.749	4095	22.316
Ctrl MO NC-C	Non Clone- Clone
Ctrl MO NC-C	Non Clone- Clone	h3b5	7.835	1538.134	205.396	4095	12.652
Ctrl MO NC-C	Non Clone- Clone	h3b5	7.835	1714.923	193.805	4095	12.652
Ctrl MO NC-C	Non Clone- Clone	h3b5	7.835	1827.55	153.24	4095	12.652
Ctrl MO NC-C	Non Clone- Clone	h3b5	7.835	1682.23	138.384	4095	12.652
Ctrl MO NC-C	Non Clone- Clone	h3b5	7.835	863.723	147.837	4071.375	12.652
Ctrl MO NC-C	Non Clone- Clone
Ctrl MO NC-C	Non Clone- Clone	h3b6	9.834	963.616	68.501	4095	15.902
Ctrl MO NC-C	Non Clone- Clone	h3b6	9.834	653.367	50.334	3450.602	15.902
Ctrl MO NC-C	Non Clone- Clone	h3b6	9.834	370.719	48.733	1495.612	15.902
Ctrl MO NC-C	Non Clone- Clone	h3b6	9.834	272.702	15.081	1554.612	15.902
Ctrl MO NC-C	Non Clone- Clone
Ctrl MO NC-C	Non Clone- Clone	h3b7	10.212	1168.637	87.176	4095	16.517
Ctrl MO NC-C	Non Clone- Clone	h3b7	10.212	1303.773	92.175	4095	16.517
Ctrl MO NC-C	Non Clone- Clone	h3b7	10.212	1299.986	53.272	4095	16.517
Ctrl MO NC-C	Non Clone- Clone	h3b7	10.212	845.194	102.128	4095	16.517
Ctrl MO NC-C	Non Clone- Clone	h3b7	10.212	525.346	69.12	2417.185	16.517
Ctrl MO NC-C	Non Clone- Clone
Ctrl MO NC-C	Non Clone- Clone	h3b8	7.673	1261.27	42.631	4095	12.381
Ctrl MO NC-C	Non Clone- Clone	h3b8	7.673	1399.761	74.441	4095	12.381
Ctrl MO NC-C	Non Clone- Clone	h3b8	7.673	1191.08	143.71	4095	12.381
Ctrl MO NC-C	Non Clone- Clone	h3b8	7.673	651.24	61.655	1841.465	12.381
Ctrl MO NC-C	Non Clone- Clone	h3b8	7.673	436.601	49.866	1471.669	12.381
Ctrl MO NC-C	Non Clone- Clone
Ctrl MO NC-C	Non Clone- Clone	h3b9	9.564	784.007	29.474	3324.147	15.463
Ctrl MO NC-C	Non Clone- Clone	h3b9	9.564	486.183	40.183	2545.421	15.463
Ctrl MO NC-C	Non Clone- Clone	h3b9	9.564	278.334	26.416	1772.148	15.463
Ctrl MO NC-C	Non Clone- Clone	h3b9	9.564	210.131	23.489	2147.073	15.463
Ctrl MO NC-C	Non Clone- Clone
Ctrl MO NC-C	Non Clone- Clone	h3b10	8.7	1270.021	117.204	4095	14.057
Ctrl MO NC-C	Non Clone- Clone	h3b10	8.7	1106.011	113.336	4092.13	14.057
Ctrl MO NC-C	Non Clone- Clone	h3b10	8.7	770.63	91.527	3692.93	14.057
Ctrl MO NC-C	Non Clone- Clone	h3b10	8.7	620.213	101.888	2751.454	14.057
Ctrl MO NC-C	Non Clone- Clone
Ctrl MO NC-C	Non Clone- Clone	h3b11	8.105	1268.25	108.286	4095	13.091
Ctrl MO NC-C	Non Clone- Clone	h3b11	8.105	1260.157	133.819	4095	13.091
Ctrl MO NC-C	Non Clone- Clone	h3b11	8.105	1153.309	179.836	4095	13.091
Ctrl MO NC-C	Non Clone- Clone	h3b11	8.105	926.101	152.735	4014.891	13.091
Ctrl MO NC-C	Non Clone- Clone	h3b11	9.942	1771.392	257.249	4095	16.077
Ctrl MO NC-C	Non Clone- Clone	h3b11	9.942	1512.401	233.93	4095	16.077
Ctrl MO NC-C	Non Clone- Clone	h3b11	9.942	1161.876	145.822	4095	16.077
Ctrl MO NC-C	Non Clone- Clone	h3b11	9.942	751.315	114.633	4091.392	16.077
Ctrl MO NC-C	Non Clone- Clone
Ctrl MO NC-C	Non Clone- Clone	h3b12	7.024	2258.688	374.175	4095	11.333
Ctrl MO NC-C	Non Clone- Clone	h3b12	7.024	2234.87	354.274	4095	11.333
Ctrl MO NC-C	Non Clone- Clone	h3b12	7.024	1982.091	302.043	4095	11.333
Ctrl MO NC-C	Non Clone- Clone	h3b12	7.024	1555.244	309.356	4093.269	11.333
Ctrl MO NC-C	Non Clone- Clone	h3b12	7.024	1300.09	148.075	4095	11.333
Ctrl MO NC-C	Non Clone- Clone	h3b12	7.024	1130.373	158.006	4095	11.333
Ctrl MO NC-C	Non Clone- Clone	h4b1	12.86	1435.406	110.821	4095	20.805
Ctrl MO NC-C	Non Clone- Clone	h4b1	12.86	1328.904	109.662	4095	20.805
Ctrl MO NC-C	Non Clone- Clone	h4b1	12.86	1049.079	59.136	4077.841	20.805
Ctrl MO NC-C	Non Clone- Clone	h4b1	12.05	1519.7	120.767	4095	19.48
Ctrl MO NC-C	Non Clone- Clone	h4b1	12.05	908.869	31.85	3496.926	19.48
Ctrl MO NC-C	Non Clone- Clone	h4b1	12.05	536.086	28.981	2399.498	19.48
Ctrl MO NC-C	Non Clone- Clone	h4b1	12.05	407.286	26.658	3692.179	19.48
Ctrl MO NC-C	Non Clone- Clone	h4b1	12.05	366.959	3.652	4095	19.48
Ctrl MO NC-C	Non Clone- Clone
Ctrl MO NC-C	Non Clone- Clone	h4b2	9.402	2363.371	133.715	4095	15.2
Ctrl MO NC-C	Non Clone- Clone	h4b2	9.402	2353.966	141.367	4095	15.2
Ctrl MO NC-C	Non Clone- Clone	h4b2	9.402	1827.74	190.026	4095	15.2
Ctrl MO NC-C	Non Clone- Clone	h4b2	9.402	888.323	140.001	4087.232	15.2
Ctrl MO NC-C	Non Clone- Clone	h4b2	9.402	562.492	104.038	3220.075	15.2
Ctrl MO NC-C	Non Clone- Clone
Ctrl MO NC-C	Non Clone- Clone	h4b3	14.535	1944.152	186.263	4095	23.546
Ctrl MO NC-C	Non Clone- Clone	h4b3	14.535	2122.503	151.245	4095	23.546
Ctrl MO NC-C	Non Clone- Clone	h4b3	14.535	2172.692	166.67	4095	23.546
Ctrl MO NC-C	Non Clone- Clone	h4b3	14.535	1950.5	287.995	4095	23.546
Ctrl MO NC-C	Non Clone- Clone	h4b3	14.535	1223.755	244.259	4081.424	23.546
Ctrl MO NC-C	Non Clone- Clone	h4b3	14.535	816.565	143.108	4093.148	23.546
Ctrl MO NC-C	Non Clone- Clone
Ctrl MO NC-C	Non Clone- Clone	h4b4	9.078	1838.424	259.87	4095	14.672
Ctrl MO NC-C	Non Clone- Clone	h4b4	9.078	1673.573	243.934	4095	14.672
Ctrl MO NC-C	Non Clone- Clone	h4b4	9.078	1555.402	203.634	4095	14.672
Ctrl MO NC-C	Non Clone- Clone	h4b4	9.078	1321.523	182.378	4095	14.672
Ctrl MO NC-C	Non Clone- Clone	h4b4	9.078	775.389	73.164	3334.424	14.672
Ctrl MO NC-C	Non Clone- Clone	h4b4	9.078	514.517	67.134	2965.769	14.672
Ctrl MO NC-C	Non Clone- Clone
Ctrl MO NC-C	Non Clone- Clone	h4b5	10.537	1478.584	69.032	4095	17.044
Ctrl MO NC-C	Non Clone- Clone	h4b5	10.537	1091.587	66.091	4095	17.044
Ctrl MO NC-C	Non Clone- Clone	h4b5	10.537	632.562	134.148	2286.022	17.044
Ctrl MO NC-C	Non Clone- Clone	h4b5	10.537	554.883	93.78	3214.109	17.044
Ctrl MO NC-C	Non Clone- Clone	h4b5	10.537	510.242	60.631	3842.243	17.044
Ctrl MO NC-C	Non Clone- Clone	h4b5	10.537	403.546	36.259	3937.535	17.044
Ctrl MO NC-C	Non Clone- Clone	h4b5	10.537	268.257	12.96	2745.596	17.044
Ctrl MO NC-C	Non Clone- Clone
Ctrl MO NC-C	Non Clone- Clone	h4b6	12.104	2420.429	164.895	4095	19.592
Ctrl MO NC-C	Non Clone- Clone	h4b6	12.104	2500.661	185.968	4095	19.592
Ctrl MO NC-C	Non Clone- Clone	h4b6	12.104	2506.95	128.156	4095	19.592
Ctrl MO NC-C	Non Clone- Clone	h4b6	12.104	2093.723	104.447	4095	19.592
Ctrl MO NC-C	Non Clone- Clone	h4b6	12.104	1198.467	124.653	4095	19.592
Ctrl MO NC-C	Non Clone- Clone	h4b6	12.104	920.01	79.094	4095	19.592
Ctrl MO NC-C	Non Clone- Clone	h4b6	12.104	662.302	30.486	4095	19.592
Ctrl MO NC-C	Non Clone- Clone	h4b6	12.104	425.821	29.441	3754.897	19.592
Ctrl MO NC-C	Non Clone- Clone	h4b6	12.104	291.486	17.524	1678.082	19.592
Ctrl MO NC-C	Non Clone- Clone
Ctrl MO NC-C	Non Clone- Clone	h4b7	8.159	1510.819	138.985	4095	13.179
Ctrl MO NC-C	Non Clone- Clone	h4b7	8.159	1714.359	154.509	4095	13.179
Ctrl MO NC-C	Non Clone- Clone	h4b7	8.159	1868.006	103.003	4095	13.179
Ctrl MO NC-C	Non Clone- Clone	h4b7	8.159	1690.872	145.576	4095	13.179
Ctrl MO NC-C	Non Clone- Clone	h4b7	8.159	1307.905	123.612	4095	13.179
Ctrl MO NC-C	Non Clone- Clone	h4b7	8.159	1035.407	80.958	4050.56	13.179
Ctrl MO NC-C	Non Clone- Clone	h4b7	8.159	697.878	53.115	3758.902	13.179
Ctrl MO NC-C	Non Clone- Clone
Ctrl MO NC-C	Non Clone- Clone	h4b8	9.996	2105.378	368.277	4095	16.166
Ctrl MO NC-C	Non Clone- Clone	h4b8	9.996	1956.845	109.261	4095	16.166
Ctrl MO NC-C	Non Clone- Clone	h4b8	9.996	1633.974	167.881	4095	16.166
Ctrl MO NC-C	Non Clone- Clone	h4b8	9.996	1226.455	163.823	4095	16.166
Ctrl MO NC-C	Non Clone- Clone	h4b8	9.996	1126.23	172.507	4095	16.166
Ctrl MO NC-C	Non Clone- Clone	h4b8	9.996	1020.938	136.613	4095	16.166
Ctrl MO NC-C	Non Clone- Clone	h4b8	9.996	944.434	158.876	4095	16.166
Ctrl MO NC-C	Non Clone- Clone	h4b8	9.996	899.703	105.064	4095	16.166
Ctrl MO NC-C	Non Clone- Clone	h4b8	9.996	978.351	73.593	4095	16.166
Ctrl MO NC-C	Non Clone- Clone
Ctrl MO NC-C	Non Clone- Clone	h4b9	10.645	2489.748	121.522	4095	17.22
Ctrl MO NC-C	Non Clone- Clone	h4b9	10.645	2223.615	128.562	4095	17.22
Ctrl MO NC-C	Non Clone- Clone	h4b9	10.645	1603.976	99.349	4095	17.22
Ctrl MO NC-C	Non Clone- Clone	h4b9	10.645	950.45	123.098	4095	17.22
Ctrl MO NC-C	Non Clone- Clone	h4b9	10.645	530.465	78.706	4075.967	17.22
Ctrl MO NC-C	Non Clone- Clone	h4b9	10.645	442.178	59.834	4095	17.22
Ctrl MO NC-C	Non Clone- Clone	h4b9	10.645	389.974	31.104	4094.317	17.22
Ctrl MO NC-C	Non Clone- Clone	h4b9	10.645	318.442	24.033	4095	17.22
Ctrl MO NC-C	Non Clone- Clone	h5b1	10.645	1750.125	188.707	4095	17.22
Ctrl MO NC-C	Non Clone- Clone	h5b1	10.645	1943.9	301.876	4095	17.22
Ctrl MO NC-C	Non Clone- Clone	h5b1	10.645	1638.606	272.383	4095	17.22
Ctrl MO NC-C	Non Clone- Clone	h5b1	10.645	1009.643	144.151	4095	17.22
Ctrl MO NC-C	Non Clone- Clone	h5b1	10.645	749.145	52.734	4075.939	17.22
Ctrl MO NC-C	Non Clone- Clone	h5b1	10.645	517.054	19.96	1970.482	17.22
Ctrl MO NC-C	Non Clone- Clone
Ctrl MO NC-C	Non Clone- Clone	h5b2	9.78	2151.5	301.551	4095	15.814
Ctrl MO NC-C	Non Clone- Clone	h5b2	9.78	2091.719	398.339	4095	15.814
Ctrl MO NC-C	Non Clone- Clone	h5b2	9.78	1771.959	374.725	4095	15.814
Ctrl MO NC-C	Non Clone- Clone	h5b2	9.78	1074.083	201.99	4095	15.814
Ctrl MO NC-C	Non Clone- Clone	h5b2	9.78	838.94	148.536	3315.014	15.814
Ctrl MO NC-C	Non Clone- Clone	h5b2	9.78	676.093	140.736	2862.568	15.814
Ctrl MO NC-C	Non Clone- Clone	h5b2	9.78	606.986	87.688	2886.49	15.814
Ctrl MO NC-C	Non Clone- Clone
Ctrl MO NC-C	Non Clone- Clone	h5b3	5.511	1718.997	120.549	4095	8.874
Ctrl MO NC-C	Non Clone- Clone	h5b3	5.511	1707.513	104.096	4095	8.874
Ctrl MO NC-C	Non Clone- Clone	h5b3	5.511	1418.995	234.912	4062.63	8.874
Ctrl MO NC-C	Non Clone- Clone	h5b3	5.511	834.055	135.062	3060.003	8.874
Ctrl MO NC-C	Non Clone- Clone	h5b3	5.511	421.676	76.227	1843.982	8.874
Ctrl MO NC-C	Non Clone- Clone	h5b3	5.511	284.808	41.837	1339.191	8.874
Ctrl MO NC-C	Non Clone- Clone
Ctrl MO NC-C	Non Clone- Clone	h5b4	9.024	905.668	124.028	4095	14.583
Ctrl MO NC-C	Non Clone- Clone	h5b4	9.024	1024.712	151.659	4095	14.583
Ctrl MO NC-C	Non Clone- Clone	h5b4	9.024	898.347	145.741	4095	14.583
Ctrl MO NC-C	Non Clone- Clone	h5b4	9.024	710.009	92.12	4095	14.583
Ctrl MO NC-C	Non Clone- Clone	h5b4	9.024	627.439	70.66	4095	14.583
Ctrl MO NC-C	Non Clone- Clone	h5b4	9.024	517.817	56.293	4057.828	14.583
Ctrl MO NC-C	Non Clone- Clone	h5b4	9.024	351.531	56.509	1362.06	14.583
Ctrl MO NC-C	Non Clone- Clone	h5b4	9.024	337.443	56.63	1202.121	14.583
Ctrl MO NC-C	Non Clone- Clone
Ctrl MO NC-C	Non Clone- Clone	h5b5	7.727	1382.247	271.965	4095	12.476
Ctrl MO NC-C	Non Clone- Clone	h5b5	7.727	1537.833	291.421	4095	12.476
Ctrl MO NC-C	Non Clone- Clone	h5b5	7.727	1511.74	192.965	4095	12.476
Ctrl MO NC-C	Non Clone- Clone	h5b5	7.727	1347.761	193.923	4095	12.476
Ctrl MO NC-C	Non Clone- Clone	h5b5	7.727	1141.531	167.356	4095	12.476
Ctrl MO NC-C	Non Clone- Clone	h5b5	7.727	713.496	70.037	3979.739	12.476
Ctrl MO NC-C	Non Clone- Clone	h5b5	7.727	420.972	24.608	1127.006	12.476
Ctrl MO NC-C	Non Clone- Clone
Ctrl MO NC-C	Non Clone- Clone	h5b6	6.214	1492.894	173.236	4095	10.012
Ctrl MO NC-C	Non Clone- Clone	h5b6	6.214	1344.022	194.38	4095	10.012
Ctrl MO NC-C	Non Clone- Clone	h5b6	6.214	917.77	155.657	4095	10.012
Ctrl MO NC-C	Non Clone- Clone	h5b6	6.214	705.399	153.748	4094.382	10.012
Ctrl MO NC-C	Non Clone- Clone	h5b6	6.214	595.942	134.418	2304.494	10.012
Ctrl MO NC-C	Non Clone- Clone
Ctrl MO NC-C	Non Clone- Clone	h5b7	5.728	1598.547	183.345	4095	9.225
Ctrl MO NC-C	Non Clone- Clone	h5b7	5.728	1700.028	179.132	4095	9.225
Ctrl MO NC-C	Non Clone- Clone	h5b7	5.728	1543.83	268.604	4095	9.225
Ctrl MO NC-C	Non Clone- Clone	h5b7	5.728	1237.646	179.506	4095	9.225
Ctrl MO NC-C	Non Clone- Clone	h5b7	5.728	863.93	145.418	4095	9.225
Ctrl MO NC-C	Non Clone- Clone	h5b7	5.728	479.954	61.231	1780.526	9.225
Ctrl MO NC-C	Non Clone- Clone	h5b7	5.728	449.832	53.492	1770.051	9.225
Ctrl MO NC-C	Non Clone- Clone
Ctrl MO NC-C	Non Clone- Clone	h5b8	6.592	1657.386	229.939	4095	10.631
Ctrl MO NC-C	Non Clone- Clone	h5b8	6.592	1860.21	233.709	4095	10.631
Ctrl MO NC-C	Non Clone- Clone	h5b8	6.592	1733.287	227.966	4095	10.631
Ctrl MO NC-C	Non Clone- Clone	h5b8	6.592	1560.824	166.099	4095	10.631
Ctrl MO NC-C	Non Clone- Clone	h5b8	6.592	1319.207	169.303	4095	10.631
Ctrl MO NC-C	Non Clone- Clone	h5b8	6.592	876.516	183.377	4017.829	10.631
Ctrl MO NC-C	Non Clone- Clone
Ctrl MO NC-C	Non Clone- Clone	h5b9	5.89	1122.512	101.133	4095	9.489
Ctrl MO NC-C	Non Clone- Clone	h5b9	5.89	1270.774	244.927	4095	9.489
Ctrl MO NC-C	Non Clone- Clone	h5b9	5.89	1196.721	125.276	4095	9.489
Ctrl MO NC-C	Non Clone- Clone	h5b9	5.89	1065.22	126.137	4095	9.489
Ctrl MO NC-C	Non Clone- Clone	h5b9	5.89	872.789	131.075	4095	9.489
Ctrl MO NC-C	Non Clone- Clone	h5b9	5.89	592.66	179.923	3014.052	9.489
Ctrl MO NC-C	Non Clone- Clone	h5b9	5.89	519.926	140.2	1356.677	9.489
Ctrl MO NC-C	Non Clone- Clone
Ctrl MO NC-C	Non Clone- Clone	h5b10	10.321	1675.928	146.886	4095	16.693
Ctrl MO NC-C	Non Clone- Clone	h5b10	10.321	2032.506	223.598	4095	16.693
Ctrl MO NC-C	Non Clone- Clone	h5b10	10.321	1992.951	489.231	4095	16.693
Ctrl MO NC-C	Non Clone- Clone	h5b10	10.321	1756.145	293.351	4092.93	16.693
Ctrl MO NC-C	Non Clone- Clone	h5b10	10.321	1391.138	175.006	4095	16.693
Ctrl MO NC-C	Non Clone- Clone	h5b10	10.321	998.059	161.305	3969.404	16.693
Ctrl MO NC-C	Non Clone- Clone	h5b10	10.321	608.02	52.065	2797.157	16.693
Ctrl MO NC-C	Non Clone- Clone
Ctrl MO NC-C	Non Clone- Clone	h5b11	6.754	1493.12	139.784	4095	10.894
Ctrl MO NC-C	Non Clone- Clone	h5b11	6.754	1404.755	209.404	4095	10.894
Ctrl MO NC-C	Non Clone- Clone	h5b11	6.754	1104.114	254.188	4095	10.894
Ctrl MO NC-C	Non Clone- Clone	h5b11	6.754	936.626	64.342	4095	10.894
Ctrl MO NC-C	Non Clone- Clone	h5b11	6.754	761.944	64.657	3657.739	10.894
Ctrl MO NC-C	Non Clone- Clone
Ctrl MO NC-C	Non Clone- Clone	h5b12	10.699	1607.234	165.334	4095	17.307
Ctrl MO NC-C	Non Clone- Clone	h5b12	10.699	1581.752	219.534	4095	17.307
Ctrl MO NC-C	Non Clone- Clone	h5b12	10.699	1471.552	216.705	4095	17.307
Ctrl MO NC-C	Non Clone- Clone	h5b12	10.699	1217.841	171.37	4095	17.307
Ctrl MO NC-C	Non Clone- Clone	h5b12	10.699	978.549	177.947	3671.492	17.307
Ctrl MO NC-C	Non Clone- Clone	h5b12	10.699	719.532	114.519	3093.38	17.307
Ctrl MO NC-C	Non Clone- Clone
Ctrl MO NC-C	Non Clone- Clone	h5b13	7.457	1816.392	162.625	4095	12.037
Ctrl MO NC-C	Non Clone- Clone	h5b13	7.457	1682.939	169.363	4095	12.037
Ctrl MO NC-C	Non Clone- Clone	h5b13	7.457	1172.252	243.577	4095	12.037
Ctrl MO NC-C	Non Clone- Clone	h5b13	7.457	530.878	112.102	2121.871	12.037
Ctrl MO NC-C	Non Clone- Clone	h5b13	7.457	366.763	96.509	1526.022	12.037
Ctrl MO NC-C	Non Clone- Clone
Ctrl MO NC-C	Non Clone- Clone	h5b14	6.052	1798.113	0	4095	9.751
Ctrl MO NC-C	Non Clone- Clone	h5b14	6.052	2072.413	0	4095	9.751
Ctrl MO NC-C	Non Clone- Clone	h5b14	6.052	1431.322	0	4095	9.751
Ctrl MO NC-C	Non Clone- Clone	h5b14	6.052	538.632	0	1973.394	9.751
Ctrl MO NC-C	Non Clone- Clone	h5b14	6.052	365.645	0	1155.681	9.751
Ctrl MO NC-C	Non Clone- Clone
Ctrl MO NC-C	Non Clone- Clone	h5b15	9.294	1381.072	160.537	4095	15.024
Ctrl MO NC-C	Non Clone- Clone	h5b15	9.294	1486.225	126.802	4095	15.024
Ctrl MO NC-C	Non Clone- Clone	h5b15	9.294	1473.169	135.636	4095	15.024
Ctrl MO NC-C	Non Clone- Clone	h5b15	9.294	1455.832	157.045	4095	15.024
Ctrl MO NC-C	Non Clone- Clone	h5b15	9.294	1216.837	67.691	4095	15.024
Ctrl MO NC-C	Non Clone- Clone	h5b15	9.294	639.937	104.977	4055.19	15.024
Ctrl MO NC-C	Non Clone- Clone	h5b15	9.294	422.53	99.38	2289.62	15.024
Ctrl MO NC-C	Non Clone- Clone
Ctrl MO NC-C	Non Clone- Clone	h5b16	4.917	1602.373	193.75	4095	7.906
Ctrl MO NC-C	Non Clone- Clone	h5b16	4.917	1422.117	310.947	4060.097	7.906
Ctrl MO NC-C	Non Clone- Clone	h5b16	4.917	1115.9	190.319	4095	7.906
Ctrl MO NC-C	Non Clone- Clone	h5b16	4.917	932.549	171.289	4023.99	7.906
Ctrl MO NC-C	Non Clone- Clone	h5b16	4.917	721.187	65.646	3341.557	7.906
Ctrl MO NC-C	Non Clone- Clone	h5b16	4.917	412.414	32.011	1546.473	7.906
Ctrl MO NC-C	Non Clone- Clone
Ctrl MO NC-C	Non Clone- Clone	h5b17	9.402	1362.512	106.085	4095	15.2
Ctrl MO NC-C	Non Clone- Clone	h5b17	9.402	1483.795	102.735	4095	15.2
Ctrl MO NC-C	Non Clone- Clone	h5b17	9.402	979.434	122.462	4088.344	15.2
Ctrl MO NC-C	Non Clone- Clone	h5b17	9.402	661.812	73.952	2547.56	15.2
Ctrl MO NC-C	Non Clone- Clone	h5b17	9.402	386.273	44.915	1318.934	15.2
Ctrl MO NC-C	Non Clone- Clone	h5b17	9.402	191.784	14.178	726.41	15.2
Ctrl MO NC-C	Non Clone- Clone
Ctrl MO NC-C	Non Clone- Clone	h5b18	10.753	1966.504	21.182	4095	17.396
Ctrl MO NC-C	Non Clone- Clone	h5b18	10.753	1504.23	23.142	4095	17.396
Ctrl MO NC-C	Non Clone- Clone	h5b18	10.753	944.802	104.485	4091.955	17.396
Ctrl MO NC-C	Non Clone- Clone	h5b18	10.753	452.835	53.618	2440.73	17.396
Ctrl MO NC-C	Non Clone- Clone	h5b18	10.753	302.673	18.606	1495.451	17.396
Ctrl MO NC-C	Non Clone- Clone	h5b18	10.753	195.647	2.223	1017.047	17.396
Ctrl MO NC-C	Non Clone- Clone
Ctrl MO NC-C	Non Clone- Clone	h5b19	10.483	1855.792	280.379	4095	16.956
Ctrl MO NC-C	Non Clone- Clone	h5b19	10.483	1822.645	179.513	4095	16.956
Ctrl MO NC-C	Non Clone- Clone	h5b19	10.158	1589.301	276.721	4095	16.429
Ctrl MO NC-C	Non Clone- Clone	h5b19	10.158	1395.693	211.131	4095	16.429
Ctrl MO NC-C	Non Clone- Clone	h5b19	10.158	1198.59	104.962	4095	16.429
Ctrl MO NC-C	Non Clone- Clone	h5b19	10.158	885.485	25.251	2751.736	16.429
Ctrl MO NC-C	Non Clone- Clone	h5b19	10.158	454.49	22.791	1946.412	16.429
Ctrl MO NC-C	Non Clone- Clone
Ctrl MO NC-C	Non Clone- Clone	h5b20	5.025	2080.743	543.674	4095	8.073
Ctrl MO NC-C	Non Clone- Clone	h5b20	5.025	1910.253	499.6	4095	8.073
Ctrl MO NC-C	Non Clone- Clone	h5b20	5.025	1497.474	241.089	4095	8.073
Ctrl MO NC-C	Non Clone- Clone	h5b20	5.025	1377.274	351.797	4095	8.073
Ctrl MO NC-C	Non Clone- Clone	h5b20	5.025	1145.974	264.667	3680.193	8.073
Ctrl MO NC-C	Non Clone- Clone	h5b20	5.025	735.363	244.293	1807.972	8.073
Ctrl MO NC-C	Non Clone- Clone
Ctrl MO NC-C	Non Clone- Clone	h5b21	9.186	1706.116	375.845	4095	14.848
Ctrl MO NC-C	Non Clone- Clone	h5b21	9.186	1598.196	284.268	4095	14.848
Ctrl MO NC-C	Non Clone- Clone	h5b21	9.186	1297.774	234.06	4093.138	14.848
Ctrl MO NC-C	Non Clone- Clone	h5b21	9.186	1131.302	182.739	3996.258	14.848
Ctrl MO NC-C	Non Clone- Clone	h5b21	9.186	943.641	168.946	2687.863	14.848
Ctrl MO NC-C	Non Clone- Clone	h5b21	9.186	755.337	73.075	2722.651	14.848
Ctrl MO NC-C	Non Clone- Clone	h5b21	9.186	521.447	21.945	2007.212	14.848
Ctrl MO NC-C	Non Clone- Clone	h5b21	9.186	405.044	19.78	1428.477	14.848
Ctrl MO NC-C	Non Clone- Clone	h6b1	11.131	1389.623	53.152	4095	18.011
Ctrl MO NC-C	Non Clone- Clone	h6b1	11.131	1555.482	173.681	4095	18.011
Ctrl MO NC-C	Non Clone- Clone	h6b1	11.131	1174.98	115.252	4095	18.011
Ctrl MO NC-C	Non Clone- Clone	h6b1	11.131	863.438	91.468	3874.335	18.011
Ctrl MO NC-C	Non Clone- Clone	h6b1	11.131	575.616	14.689	1713.061	18.011
Ctrl MO NC-C	Non Clone- Clone	h6b1	11.131	478.494	25.22	2439.285	18.011
Ctrl MO NC-C	Non Clone- Clone	h6b1	11.131	429.364	25.226	2242.115	18.011
Ctrl MO NC-C	Non Clone- Clone
Ctrl MO NC-C	Non Clone- Clone	h6b2	5.133	1015.009	112.012	4095	8.259
Ctrl MO NC-C	Non Clone- Clone	h6b2	5.133	1293.92	120.097	4095	8.259
Ctrl MO NC-C	Non Clone- Clone	h6b2	5.133	1433.122	145.445	4095	8.259
Ctrl MO NC-C	Non Clone- Clone	h6b2	5.133	985.693	194.919	4095	8.259
Ctrl MO NC-C	Non Clone- Clone	h6b2	5.133	638.057	64.235	2738.316	8.259
Ctrl MO NC-C	Non Clone- Clone	h6b2	5.133	478.166	52.443	1548.754	8.259
Ctrl MO NC-C	Non Clone- Clone
Ctrl MO NC-C	Non Clone- Clone	h6b3	7.889	1517.468	139.217	4095	12.74
Ctrl MO NC-C	Non Clone- Clone	h6b3	7.889	1872.363	102.662	4095	12.74
Ctrl MO NC-C	Non Clone- Clone	h6b3	7.889	1846.863	235.837	4095	12.74
Ctrl MO NC-C	Non Clone- Clone	h6b3	7.889	1438.694	119.386	4095	12.74
Ctrl MO NC-C	Non Clone- Clone	h6b3	7.889	1146.343	63.867	4095	12.74
Ctrl MO NC-C	Non Clone- Clone
Ctrl MO NC-C	Non Clone- Clone	h6b4	5.349	1536.031	209.234	4095	8.61
Ctrl MO NC-C	Non Clone- Clone	h6b4	5.349	1472.378	183.33	4095	8.61
Ctrl MO NC-C	Non Clone- Clone	h6b4	5.349	1232.587	172.639	4095	8.61
Ctrl MO NC-C	Non Clone- Clone	h6b4	5.349	766.715	163.695	2751.788	8.61
Ctrl MO NC-C	Non Clone- Clone	h6b4	5.349	498.386	100.368	1418.314	8.61
Ctrl MO NC-C	Non Clone- Clone	h6b4	5.349	365.785	81.044	1095.457	8.61
Ctrl MO NC-C	Non Clone- Clone
Ctrl MO NC-C	Non Clone- Clone	h6b5	4.917	1630.021	92.069	4095	7.907
Ctrl MO NC-C	Non Clone- Clone	h6b5	4.917	1784.948	248.751	4095	7.907
Ctrl MO NC-C	Non Clone- Clone	h6b5	4.917	1471.905	291.36	4095	7.907
Ctrl MO NC-C	Non Clone- Clone	h6b5	4.917	1173.219	159.556	3455.125	7.907
Ctrl MO NC-C	Non Clone- Clone	h6b5	4.917	753.666	214.257	1814.735	7.907
Ctrl MO NC-C	Non Clone- Clone	h6b5	4.917	393.594	70.329	1248.04	7.907
Ctrl MO NC-C	Non Clone- Clone
Ctrl MO NC-C	Non Clone- Clone	h6b6	9.51	1571.688	87.188	4095	15.375
Ctrl MO NC-C	Non Clone- Clone	h6b6	9.51	1508.578	104.321	4095	15.375
Ctrl MO NC-C	Non Clone- Clone	h6b6	9.51	1095.975	179.368	4095	15.375
Ctrl MO NC-C	Non Clone- Clone	h6b6	9.51	695.257	80.615	4095	15.375
Ctrl MO NC-C	Non Clone- Clone	h6b6	9.51	504.79	22.128	2358.978	15.375
Ctrl MO NC-C	Non Clone- Clone
Ctrl MO NC-C	Non Clone- Clone	h6b7	5.566	1486.146	88.755	4095	8.961
Ctrl MO NC-C	Non Clone- Clone	h6b7	5.566	1302.123	115.69	4095	8.961
Ctrl MO NC-C	Non Clone- Clone	h6b7	5.566	870.715	134.504	4095	8.961
Ctrl MO NC-C	Non Clone- Clone	h6b7	5.566	615.553	132.325	2215.538	8.961
Ctrl MO NC-C	Non Clone- Clone	h6b7	5.566	504.18	137.422	1455.967	8.961
Ctrl MO NC-C	Non Clone- Clone	h6b7	5.566	350.354	60.936	1285.637	8.961
Ctrl MO NC-C	Non Clone- Clone
Ctrl MO NC-C	Non Clone- Clone	h6b8	9.348	1380.304	81.084	4095	15.112
Ctrl MO NC-C	Non Clone- Clone	h6b8	9.348	1053.917	136.221	4095	15.112
Ctrl MO NC-C	Non Clone- Clone	h6b8	9.348	854.842	135.964	4095	15.112
Ctrl MO NC-C	Non Clone- Clone	h6b8	9.348	632.807	44.693	4088.704	15.112
Ctrl MO NC-C	Non Clone- Clone	h6b8	9.348	375.09	39.884	1479.145	15.112
Ctrl MO NC-C	Non Clone- Clone	h6b8	9.348	275.942	39.391	1124.433	15.112
Ctrl MO NC-C	Non Clone- Clone
Ctrl MO NC-C	Non Clone- Clone	h6b9	9.132	1449.55	185.401	4095	14.76
Ctrl MO NC-C	Non Clone- Clone	h6b9	9.132	1487.226	259.594	4095	14.76
Ctrl MO NC-C	Non Clone- Clone	h6b9	9.132	1471.359	104.085	4095	14.76
Ctrl MO NC-C	Non Clone- Clone	h6b9	9.132	1389.55	103.469	4095	14.76
Ctrl MO NC-C	Non Clone- Clone	h6b9	9.132	922.643	78.492	4095	14.76
Ctrl MO NC-C	Non Clone- Clone	h6b9	9.132	551.216	61.399	2348.21	14.76
Ctrl MO NC-C	Non Clone- Clone	h6b9	9.132	437.584	83.47	1390.324	14.76
Ctrl MO NC-C	Non Clone- Clone
Ctrl MO NC-C	Non Clone- Clone	h6b10	8.754	1383.09	142.764	4095	14.145
Ctrl MO NC-C	Non Clone- Clone	h6b10	8.754	1547.52	165.697	4095	14.145
Ctrl MO NC-C	Non Clone- Clone	h6b10	8.754	1619.64	174.546	4095	14.145
Ctrl MO NC-C	Non Clone- Clone	h6b10	10.104	1172.596	234.672	4095	16.342
Ctrl MO NC-C	Non Clone- Clone	h6b10	10.104	867.28	182.224	3745.213	16.342
Ctrl MO NC-C	Non Clone- Clone	h6b10	10.104	613.74	96.042	3977.006	16.342
Ctrl MO NC-C	Non Clone- Clone	h6b10	10.104	523.134	76.358	2258.154	16.342
Ctrl MO NC-C	Non Clone- Clone	h6b10	10.104	466.896	30.714	1900.188	16.342
Ctrl MO NC-C	Non Clone- Clone
Ctrl MO NC-C	Non Clone- Clone	h6b11	4.161	1061.232	295.783	4087.81	6.676
Ctrl MO NC-C	Non Clone- Clone	h6b11	4.161	1103.43	155.698	4017.911	6.676
Ctrl MO NC-C	Non Clone- Clone	h6b11	4.161	1080.414	237.086	3957.653	6.676
Ctrl MO NC-C	Non Clone- Clone	h6b11	4.161	964.386	84.51	3760.489	6.676
Ctrl MO NC-C	Non Clone- Clone	h6b11	4.161	842.854	117.772	3591.086	6.676
Ctrl MO NC-C	Non Clone- Clone
Ctrl MO NC-C	Non Clone- Clone	h6b12	9.672	982.442	69.319	4095	15.639
Ctrl MO NC-C	Non Clone- Clone	h6b12	9.672	904.911	87.552	4074.846	15.639
Ctrl MO NC-C	Non Clone- Clone	h6b12	9.672	1030.911	116.494	4095	15.639
Ctrl MO NC-C	Non Clone- Clone	h6b12	9.672	1293.752	117.617	4095	15.639
Ctrl MO NC-C	Non Clone- Clone	h6b12	9.672	1436.764	108.965	4095	15.639
Ctrl MO NC-C	Non Clone- Clone	h6b12	9.672	1087.151	155.315	4044.625	15.639
Ctrl MO NC-C	Non Clone- Clone	h6b12	9.672	799.241	104.915	3396.652	15.639
Ctrl MO NC-C	Non Clone- Clone	h6b12	9.672	550.302	66.462	2393.158	15.639
Ctrl MO NC-C	Non Clone- Clone	h7b3	7.457	2602.522	181.921	4095	12.037
Ctrl MO NC-C	Non Clone- Clone	h7b3	7.457	2728.168	358.714	4095	12.037
Ctrl MO NC-C	Non Clone- Clone	h7b3	7.457	2328.305	249.661	4095	12.037
Ctrl MO NC-C	Non Clone- Clone	h7b3	7.457	1219.175	128.703	4095	12.037
Ctrl MO NC-C	Non Clone- Clone	h7b3	7.457	779.769	49.267	2990.258	12.037
Ctrl MO NC-C	Non Clone- Clone	h7b3	7.457	534.763	70.813	3088.952	12.037
Ctrl MO NC-C	Non Clone- Clone
Ctrl MO NC-C	Non Clone- Clone	h7b4	7.727	3098.614	144.144	4095	12.476
Ctrl MO NC-C	Non Clone- Clone	h7b4	7.727	3184.107	168.609	4095	12.476
Ctrl MO NC-C	Non Clone- Clone	h7b4	7.727	2856.258	128.065	4095	12.476
Ctrl MO NC-C	Non Clone- Clone	h7b4	7.727	1981.279	135.179	4095	12.476
Ctrl MO NC-C	Non Clone- Clone	h7b4	7.727	997.904	78.776	4095	12.476
Ctrl MO NC-C	Non Clone- Clone	h7b4	7.727	625.399	53.064	3291.858	12.476
Ctrl MO NC-C	Non Clone- Clone
Ctrl MO NC-C	Non Clone- Clone	h7b5	7.673	1575.757	201.397	4095	12.388
Ctrl MO NC-C	Non Clone- Clone	h7b5	7.673	1286.914	139.761	4095	12.388
Ctrl MO NC-C	Non Clone- Clone	h7b5	7.673	531.623	68.17	2340.482	12.388
Ctrl MO NC-C	Non Clone- Clone	h7b5	7.673	353.985	43.991	1433.204	12.388
Ctrl MO NC-C	Non Clone- Clone	h7b5	7.673	267.471	18.23	1317.262	12.388
Ctrl MO NC-C	Non Clone- Clone
Ctrl MO NC-C	Non Clone- Clone	h7b6	8.97	3164.983	567.744	4095	14.497
Ctrl MO NC-C	Non Clone- Clone	h7b6	8.97	3270.973	620.534	4095	14.497
Ctrl MO NC-C	Non Clone- Clone	h7b6	8.97	2656.029	401.639	4095	14.497
Ctrl MO NC-C	Non Clone- Clone	h7b6	8.97	1634.87	206.295	4095	14.497
Ctrl MO NC-C	Non Clone- Clone	h7b6	8.97	1140.266	131.362	4095	14.497
Ctrl MO NC-C	Non Clone- Clone	h7b6	8.97	770.473	87.174	4009.536	14.497
Ctrl MO NC-C	Non Clone- Clone
Ctrl MO NC-C	Non Clone- Clone	h7b7	6.16	2069.183	279.354	4095	9.927
Ctrl MO NC-C	Non Clone- Clone	h7b7	6.16	1999.686	184.029	4095	9.927
Ctrl MO NC-C	Non Clone- Clone	h7b7	6.16	1678.282	112.139	4095	9.927
Ctrl MO NC-C	Non Clone- Clone	h7b7	6.16	1229.342	75.308	4095	9.927
Ctrl MO NC-C	Non Clone- Clone	h7b7	6.16	828.785	57.001	4095	9.927
Ctrl MO NC-C	Non Clone- Clone
Ctrl MO NC-C	Non Clone- Clone	h7b8	9.564	2427.889	392.856	4095	15.463
Ctrl MO NC-C	Non Clone- Clone	h7b8	9.564	2657.721	349.252	4095	15.463
Ctrl MO NC-C	Non Clone- Clone	h7b8	9.564	2793.14	324.17	4095	15.463
Ctrl MO NC-C	Non Clone- Clone	h7b8	9.564	2564.104	331.839	4095	15.463
Ctrl MO NC-C	Non Clone- Clone	h7b8	9.564	1502.055	295.605	4095	15.463
Ctrl MO NC-C	Non Clone- Clone	h7b8	9.564	1089.743	234.192	4095	15.463
Ctrl MO NC-C	Non Clone- Clone	h7b8	9.564	716.561	114.2	3872.429	15.463
Ctrl MO NC-C	Non Clone- Clone
Ctrl MO NC-C	Non Clone- Clone	h7b9	6.862	2647.391	385.203	4095	11.07
Ctrl MO NC-C	Non Clone- Clone	h7b9	6.862	2369.133	302.791	4095	11.07
Ctrl MO NC-C	Non Clone- Clone	h7b9	6.862	1099.153	239.264	3784.934	11.07
Ctrl MO NC-C	Non Clone- Clone	h7b9	6.862	778.913	212.489	4094.993	11.07
Ctrl MO NC-C	Non Clone- Clone	h7b9	6.862	577.89	146.758	4094.878	11.07
Ctrl MO NC-C	Non Clone- Clone
Ctrl MO NC-C	Non Clone- Clone	h7b10	4.593	2542.552	195.832	4095	7.38
Ctrl MO NC-C	Non Clone- Clone	h7b10	4.593	2489.847	404.457	4095	7.38
Ctrl MO NC-C	Non Clone- Clone	h7b10	4.593	1563.91	130.997	4095	7.38
Ctrl MO NC-C	Non Clone- Clone	h7b10	4.593	1091.58	93.986	4041.607	7.38
Ctrl MO NC-C	Non Clone- Clone	h7b10	4.593	662.836	70.268	2167.427	7.38
Ctrl MO NC-C	Non Clone- Clone
Ctrl MO NC-C	Non Clone- Clone	h7b11	9.348	2361.155	204.673	4095	15.108
Ctrl MO NC-C	Non Clone- Clone	h7b11	9.348	2041.234	206.799	4095	15.108
Ctrl MO NC-C	Non Clone- Clone	h7b11	9.348	1680.083	89.114	4095	15.108
Ctrl MO NC-C	Non Clone- Clone	h7b11	9.348	1138.656	61.669	4095	15.108
Ctrl MO NC-C	Non Clone- Clone	h7b11	9.348	642.402	30.292	3010.203	15.108
Ctrl MO NC-C	Non Clone- Clone	h7b11	9.348	301.422	12.166	1867.122	15.108
Ctrl MO NC-NC	Non Clone- Non Clone	h1b1	12.644	1099.108	98.321	4095	20.471
Ctrl MO NC-NC	Non Clone- Non Clone	h1b1	12.644	1041.202	118.264	4095	20.471
Ctrl MO NC-NC	Non Clone- Non Clone	h1b1	12.644	653.347	105.003	2982.681	20.471
Ctrl MO NC-NC	Non Clone- Non Clone	h1b1	12.644	468.93	47.472	2607.463	20.471
Ctrl MO NC-NC	Non Clone- Non Clone	h1b1	12.644	326.812	6.957	2494.078	20.471
Ctrl MO NC-NC	Non Clone- Non Clone	h1b1	12.644	199.17	7.994	1494.959	20.471
Ctrl MO NC-NC	Non Clone- Non Clone
Ctrl MO NC-NC	Non Clone- Non Clone	h1b2	10.861	1558.635	208.838	4095	17.572
Ctrl MO NC-NC	Non Clone- Non Clone	h1b2	10.861	1307.421	166.254	4095	17.572
Ctrl MO NC-NC	Non Clone- Non Clone	h1b2	10.861	1200.797	67.286	4095	17.572
Ctrl MO NC-NC	Non Clone- Non Clone	h1b2	10.861	1015.462	32.083	4095	17.572
Ctrl MO NC-NC	Non Clone- Non Clone	h1b2	10.861	770.813	59.209	4095	17.572
Ctrl MO NC-NC	Non Clone- Non Clone	h1b2	10.861	572.016	33.124	4014.128	17.572
Ctrl MO NC-NC	Non Clone- Non Clone
Ctrl MO NC-NC	Non Clone- Non Clone	h1b3	11.563	1363.709	150.901	4095	18.714
Ctrl MO NC-NC	Non Clone- Non Clone	h1b3	11.563	1206.911	185.167	4095	18.714
Ctrl MO NC-NC	Non Clone- Non Clone	h1b3	11.563	883.652	114.688	4016.775	18.714
Ctrl MO NC-NC	Non Clone- Non Clone	h1b3	11.563	583.743	51.773	3875.763	18.714
Ctrl MO NC-NC	Non Clone- Non Clone	h1b3	11.563	388.604	30.104	4090.653	18.714
Ctrl MO NC-NC	Non Clone- Non Clone	h1b3	11.563	271.968	13.462	2596.797	18.714
Ctrl MO NC-NC	Non Clone- Non Clone
Ctrl MO NC-NC	Non Clone- Non Clone	h1b4	8.808	963.3	73.952	4095	14.233
Ctrl MO NC-NC	Non Clone- Non Clone	h1b4	8.808	914.086	90.299	4012.404	14.233
Ctrl MO NC-NC	Non Clone- Non Clone	h1b4	9.078	787.513	39.674	3615.854	14.672
Ctrl MO NC-NC	Non Clone- Non Clone	h1b4	9.078	733.056	39.993	3566.621	14.672
Ctrl MO NC-NC	Non Clone- Non Clone	h1b4	9.078	669.569	63.516	4090.095	14.672
Ctrl MO NC-NC	Non Clone- Non Clone	h1b4	9.942	911.731	81.387	4095	16.078
Ctrl MO NC-NC	Non Clone- Non Clone	h1b4	9.942	871.046	77.122	4074.311	16.078
Ctrl MO NC-NC	Non Clone- Non Clone	h1b4	9.942	793.799	60.212	4095	16.078
Ctrl MO NC-NC	Non Clone- Non Clone	h1b4	9.942	684.915	57.205	4095	16.078
Ctrl MO NC-NC	Non Clone- Non Clone
Ctrl MO NC-NC	Non Clone- Non Clone	h1b5	8.429	1129.751	135.166	4095	13.618
Ctrl MO NC-NC	Non Clone- Non Clone	h1b5	8.429	1083.57	154.08	4080.201	13.618
Ctrl MO NC-NC	Non Clone- Non Clone	h1b5	8.429	994.692	152.803	3975.339	13.618
Ctrl MO NC-NC	Non Clone- Non Clone	h1b5	8.429	848.19	99.776	4095	13.618
Ctrl MO NC-NC	Non Clone- Non Clone	h1b5	8.429	723.423	96.143	3778.403	13.618
Ctrl MO NC-NC	Non Clone- Non Clone	h1b5	8.429	558.75	71.224	3902.104	13.618
Ctrl MO NC-NC	Non Clone- Non Clone	h1b5	12.05	501.555	40.114	4095	19.505
Ctrl MO NC-NC	Non Clone- Non Clone	h1b5	12.05	341.275	10.318	3615.535	19.505
Ctrl MO NC-NC	Non Clone- Non Clone
Ctrl MO NC-NC	Non Clone- Non Clone	h1b6	12.104	1059.744	79.226	4095	19.593
Ctrl MO NC-NC	Non Clone- Non Clone	h1b6	12.104	1151.518	63.843	4095	19.593
Ctrl MO NC-NC	Non Clone- Non Clone	h1b6	12.104	971.254	66.714	4095	19.593
Ctrl MO NC-NC	Non Clone- Non Clone	h1b6	12.104	775.702	10.942	4068.66	19.593
Ctrl MO NC-NC	Non Clone- Non Clone	h1b6	12.104	523.55	24.306	3664.393	19.593
Ctrl MO NC-NC	Non Clone- Non Clone
Ctrl MO NC-NC	Non Clone- Non Clone	h1b7	11.077	918.322	78.115	4093.713	17.923
Ctrl MO NC-NC	Non Clone- Non Clone	h1b7	11.077	771.731	87.582	4095	17.923
Ctrl MO NC-NC	Non Clone- Non Clone	h1b7	11.077	647.208	80.78	4095	17.923
Ctrl MO NC-NC	Non Clone- Non Clone	h1b7	11.077	506.899	65.879	3955.565	17.923
Ctrl MO NC-NC	Non Clone- Non Clone	h1b7	9.294	795.102	46.945	3393.142	15.023
Ctrl MO NC-NC	Non Clone- Non Clone	h1b7	9.294	634.727	76.969	3998.2	15.023
Ctrl MO NC-NC	Non Clone- Non Clone	h1b7	9.294	422.476	63.006	1928.167	15.023
Ctrl MO NC-NC	Non Clone- Non Clone	h1b7	9.294	180.025	11.575	926.8	15.023
Ctrl MO NC-NC	Non Clone- Non Clone
Ctrl MO NC-NC	Non Clone- Non Clone	h1b8	8.916	968.758	33.391	3769.186	14.409
Ctrl MO NC-NC	Non Clone- Non Clone	h1b8	8.916	707.984	82.165	4056.71	14.409
Ctrl MO NC-NC	Non Clone- Non Clone	h1b8	8.916	517.395	63.612	4095	14.409
Ctrl MO NC-NC	Non Clone- Non Clone	h1b8	8.916	437.986	52.149	4095	14.409
Ctrl MO NC-NC	Non Clone- Non Clone	h1b8	8.916	311.623	27.017	3727.699	14.409
Ctrl MO NC-NC	Non Clone- Non Clone	h1b8	8.916	209.933	7.187	3330.777	14.409
Ctrl MO NC-NC	Non Clone- Non Clone
Ctrl MO NC-NC	Non Clone- Non Clone	h1b9	10.861	1436.291	61.685	4095	17.572
Ctrl MO NC-NC	Non Clone- Non Clone	h1b9	10.861	1168.397	93.638	4095	17.572
Ctrl MO NC-NC	Non Clone- Non Clone	h1b9	10.861	953.153	107.252	4095	17.572
Ctrl MO NC-NC	Non Clone- Non Clone	h1b9	12.374	877.924	92.42	4031.954	20.032
Ctrl MO NC-NC	Non Clone- Non Clone	h1b9	12.374	571.196	29.05	2926.574	20.032
Ctrl MO NC-NC	Non Clone- Non Clone	h1b9	12.374	393.555	30.955	1681.452	20.032
Ctrl MO NC-NC	Non Clone- Non Clone	h1b9	12.374	296.96	17.401	1799.039	20.032
Ctrl MO NC-NC	Non Clone- Non Clone	h1b9	12.374	214.254	5.024	1186.932	20.032
Ctrl MO NC-NC	Non Clone- Non Clone	h2b1	13.617	1623.161	107.051	4095	22.052
Ctrl MO NC-NC	Non Clone- Non Clone	h2b1	13.617	1801.073	103.987	4095	22.052
Ctrl MO NC-NC	Non Clone- Non Clone	h2b1	13.617	1721.702	173.348	4095	22.052
Ctrl MO NC-NC	Non Clone- Non Clone	h2b1	13.617	1115.359	177.801	4095	22.052
Ctrl MO NC-NC	Non Clone- Non Clone	h2b1	13.617	737.111	75.375	4095	22.052
Ctrl MO NC-NC	Non Clone- Non Clone	h2b1	13.617	577.664	45.593	3988.608	22.052
Ctrl MO NC-NC	Non Clone- Non Clone
Ctrl MO NC-NC	Non Clone- Non Clone	h2b2	10.807	1200.496	176.449	4095	17.484
Ctrl MO NC-NC	Non Clone- Non Clone	h2b2	10.807	1109.276	127.187	4095	17.484
Ctrl MO NC-NC	Non Clone- Non Clone	h2b2	9.078	2272.723	332.067	4095	14.672
Ctrl MO NC-NC	Non Clone- Non Clone	h2b2	9.078	1993.335	295.372	4095	14.672
Ctrl MO NC-NC	Non Clone- Non Clone	h2b2	9.078	1710.192	267.884	4095	14.672
Ctrl MO NC-NC	Non Clone- Non Clone	h2b2	9.078	1363.605	117.457	4095	14.672
Ctrl MO NC-NC	Non Clone- Non Clone	h2b2	9.078	974.357	149.781	4095	14.672
Ctrl MO NC-NC	Non Clone- Non Clone
Ctrl MO NC-NC	Non Clone- Non Clone	h2b3	5.566	1337.086	187.396	4095	8.962
Ctrl MO NC-NC	Non Clone- Non Clone	h2b3	5.566	1506.821	256.589	4095	8.962
Ctrl MO NC-NC	Non Clone- Non Clone	h2b3	6.862	1868.838	371.244	4095	11.07
Ctrl MO NC-NC	Non Clone- Non Clone	h2b3	6.862	1713.8	238.718	4095	11.07
Ctrl MO NC-NC	Non Clone- Non Clone	h2b3	6.862	1427.157	254.079	4095	11.07
Ctrl MO NC-NC	Non Clone- Non Clone	h2b3	6.862	973.537	171.973	4092.729	11.07
Ctrl MO NC-NC	Non Clone- Non Clone
Ctrl MO NC-NC	Non Clone- Non Clone	h2b4	9.996	1179.78	96.799	4095	16.166
Ctrl MO NC-NC	Non Clone- Non Clone	h2b4	9.996	905.835	168.784	3920.71	16.166
Ctrl MO NC-NC	Non Clone- Non Clone	h2b4	9.618	1030.806	153.507	3986.699	15.551
Ctrl MO NC-NC	Non Clone- Non Clone	h2b4	9.618	755.314	95.711	4057.79	15.551
Ctrl MO NC-NC	Non Clone- Non Clone	h2b4	9.618	510.549	108.247	4095	15.551
Ctrl MO NC-NC	Non Clone- Non Clone	h2b4	9.618	287.936	26.474	1523.755	15.551
Ctrl MO NC-NC	Non Clone- Non Clone
Ctrl MO NC-NC	Non Clone- Non Clone	h2b5	10.807	1990.012	264.001	4095	17.484
Ctrl MO NC-NC	Non Clone- Non Clone	h2b5	10.807	1688.865	157.068	4095	17.484
Ctrl MO NC-NC	Non Clone- Non Clone	h2b5	10.807	1100.295	152.295	4090.928	17.484
Ctrl MO NC-NC	Non Clone- Non Clone	h2b5	10.807	687.951	98.792	3208.949	17.484
Ctrl MO NC-NC	Non Clone- Non Clone	h2b5	10.807	565.812	45.108	3213.501	17.484
Ctrl MO NC-NC	Non Clone- Non Clone	h2b5	10.807	470.378	39.511	2964.226	17.484
Ctrl MO NC-NC	Non Clone- Non Clone
Ctrl MO NC-NC	Non Clone- Non Clone	h2b6	8.159	1295.603	92.952	4095	13.179
Ctrl MO NC-NC	Non Clone- Non Clone	h2b6	8.159	1088.757	131.256	4095	13.179
Ctrl MO NC-NC	Non Clone- Non Clone	h2b6	8.159	840.712	114.061	4091.351	13.179
Ctrl MO NC-NC	Non Clone- Non Clone	h2b6	8.159	729.294	116.74	4095	13.179
Ctrl MO NC-NC	Non Clone- Non Clone
Ctrl MO NC-NC	Non Clone- Non Clone	h2b7	12.644	1538.741	33.301	4095	20.471
Ctrl MO NC-NC	Non Clone- Non Clone	h2b7	12.644	1390.764	13.35	4095	20.471
Ctrl MO NC-NC	Non Clone- Non Clone	h2b7	12.644	901.969	16.523	4095	20.471
Ctrl MO NC-NC	Non Clone- Non Clone	h2b7	12.644	466.96	31.272	3791.963	20.471
Ctrl MO NC-NC	Non Clone- Non Clone	h2b7	12.644	361.113	17.997	3314.551	20.471
Ctrl MO NC-NC	Non Clone- Non Clone
Ctrl MO NC-NC	Non Clone- Non Clone	h2b8	11.239	1717.745	138.859	4095	18.186
Ctrl MO NC-NC	Non Clone- Non Clone	h2b8	11.239	1891.554	168.857	4095	18.186
Ctrl MO NC-NC	Non Clone- Non Clone	h2b8	11.239	1812.441	164.667	4095	18.186
Ctrl MO NC-NC	Non Clone- Non Clone	h2b8	11.239	1165.471	130.157	4095	18.186
Ctrl MO NC-NC	Non Clone- Non Clone	h2b8	11.239	632.876	85.012	4095	18.186
Ctrl MO NC-NC	Non Clone- Non Clone	h2b8	11.239	491.992	81.397	4095	18.186
Ctrl MO NC-NC	Non Clone- Non Clone
Ctrl MO NC-NC	Non Clone- Non Clone	h2b9	13.292	1973.626	160.396	4095	21.525
Ctrl MO NC-NC	Non Clone- Non Clone	h2b9	13.292	1533.657	336.035	4095	21.525
Ctrl MO NC-NC	Non Clone- Non Clone	h2b9	13.292	692.244	155.387	3042.287	21.525
Ctrl MO NC-NC	Non Clone- Non Clone	h2b9	13.292	407.52	50.494	4095	21.525
Ctrl MO NC-NC	Non Clone- Non Clone	h2b9	13.292	314.005	22.943	4095	21.525
Ctrl MO NC-NC	Non Clone- Non Clone
Ctrl MO NC-NC	Non Clone- Non Clone	h2b10	10.05	1976.752	193.357	4095	16.254
Ctrl MO NC-NC	Non Clone- Non Clone	h2b10	10.05	2014.345	252.039	4095	16.254
Ctrl MO NC-NC	Non Clone- Non Clone	h2b10	10.05	1574.919	299.204	4095	16.254
Ctrl MO NC-NC	Non Clone- Non Clone	h2b10	10.05	1272.581	191.05	4094.344	16.254
Ctrl MO NC-NC	Non Clone- Non Clone	h2b10	10.05	1095.934	157.281	4095	16.254
Ctrl MO NC-NC	Non Clone- Non Clone	h3b1	9.78	894.96	161.881	4095	15.814
Ctrl MO NC-NC	Non Clone- Non Clone	h3b1	9.78	703.197	142.477	3381.559	15.814
Ctrl MO NC-NC	Non Clone- Non Clone	h3b1	9.78	450.861	68.506	4001.018	15.814
Ctrl MO NC-NC	Non Clone- Non Clone	h3b1	9.78	378.475	40.98	3985.106	15.814
Ctrl MO NC-NC	Non Clone- Non Clone	h3b1	9.78	355.506	27.203	3883.426	15.814
Ctrl MO NC-NC	Non Clone- Non Clone
Ctrl MO NC-NC	Non Clone- Non Clone	h3b2	7.673	1741.738	178.886	4095	12.388
Ctrl MO NC-NC	Non Clone- Non Clone	h3b2	7.673	1815.75	166.924	4095	12.388
Ctrl MO NC-NC	Non Clone- Non Clone	h3b2	7.673	1233.413	181.249	4095	12.388
Ctrl MO NC-NC	Non Clone- Non Clone	h3b2	7.673	658.756	118.102	4095	12.388
Ctrl MO NC-NC	Non Clone- Non Clone	h3b2	7.673	388.3	53.704	2176.513	12.388
Ctrl MO NC-NC	Non Clone- Non Clone
Ctrl MO NC-NC	Non Clone- Non Clone	h3b3	11.833	1796.413	89.16	4095	19.153
Ctrl MO NC-NC	Non Clone- Non Clone	h3b3	11.833	1505.338	81.09	4095	19.153
Ctrl MO NC-NC	Non Clone- Non Clone	h3b3	11.833	979.912	107.519	4091.483	19.153
Ctrl MO NC-NC	Non Clone- Non Clone	h3b3	11.833	400.696	64.783	2506.157	19.153
Ctrl MO NC-NC	Non Clone- Non Clone	h3b3	11.833	256.242	22.353	2075.562	19.153
Ctrl MO NC-NC	Non Clone- Non Clone	h3b3	11.833	198.523	11.262	1098.691	19.153
Ctrl MO NC-NC	Non Clone- Non Clone
Ctrl MO NC-NC	Non Clone- Non Clone	h3b4	7.078	2072.02	121.556	4095	11.422
Ctrl MO NC-NC	Non Clone- Non Clone	h3b4	7.078	2276.299	123.783	4095	11.422
Ctrl MO NC-NC	Non Clone- Non Clone	h3b4	7.078	2279.135	183.311	4095	11.422
Ctrl MO NC-NC	Non Clone- Non Clone	h3b4	7.078	1784.355	227.562	4095	11.422
Ctrl MO NC-NC	Non Clone- Non Clone	h3b4	7.078	739.869	149.217	2234.023	11.422
Ctrl MO NC-NC	Non Clone- Non Clone	h3b4	7.078	424.481	84.277	2317.866	11.422
Ctrl MO NC-NC	Non Clone- Non Clone
Ctrl MO NC-NC	Non Clone- Non Clone	h3b5	9.726	1575.895	231.962	4095	15.727
Ctrl MO NC-NC	Non Clone- Non Clone	h3b5	9.726	1456.504	325.545	4095	15.727
Ctrl MO NC-NC	Non Clone- Non Clone	h3b5	9.726	1161.002	130.344	4095	15.727
Ctrl MO NC-NC	Non Clone- Non Clone	h3b5	9.726	713.142	69.265	4083.42	15.727
Ctrl MO NC-NC	Non Clone- Non Clone	h3b5	9.726	522.713	69.879	4095	15.727
Ctrl MO NC-NC	Non Clone- Non Clone
Ctrl MO NC-NC	Non Clone- Non Clone	h3b6	4.593	2194.054	331.257	4095	7.38
Ctrl MO NC-NC	Non Clone- Non Clone	h3b6	4.593	1962.095	372.593	4095	7.38
Ctrl MO NC-NC	Non Clone- Non Clone	h3b6	4.593	1015.043	170.386	3050.94	7.38
Ctrl MO NC-NC	Non Clone- Non Clone	h3b6	4.593	456.406	91.484	1477.514	7.38
Ctrl MO NC-NC	Non Clone- Non Clone	h3b6	4.593	305.589	76.3	1040.194	7.38
Ctrl MO NC-NC	Non Clone- Non Clone
Ctrl MO NC-NC	Non Clone- Non Clone	h3b7	9.726	1742.75	142.326	4095	15.726
Ctrl MO NC-NC	Non Clone- Non Clone	h3b7	9.726	1863.344	157.813	4095	15.726
Ctrl MO NC-NC	Non Clone- Non Clone	h3b7	9.726	1555.505	100.92	4095	15.726
Ctrl MO NC-NC	Non Clone- Non Clone	h3b7	9.726	994.981	64.635	3839.485	15.726
Ctrl MO NC-NC	Non Clone- Non Clone	h3b7	9.726	653.869	31.011	4094.792	15.726
Ctrl MO NC-NC	Non Clone- Non Clone
Ctrl MO NC-NC	Non Clone- Non Clone	h3b8	7.727	2015.597	149.093	4095	12.476
Ctrl MO NC-NC	Non Clone- Non Clone	h3b8	7.727	2033.799	154.022	4095	12.476
Ctrl MO NC-NC	Non Clone- Non Clone	h3b8	7.727	1558.202	134.744	4095	12.476
Ctrl MO NC-NC	Non Clone- Non Clone	h3b8	8.591	1344.882	168.361	4095	13.882
Ctrl MO NC-NC	Non Clone- Non Clone	h3b8	8.591	206.076	15.02	1987.867	13.882
Ctrl MO NC-NC	Non Clone- Non Clone	h4b1	11.996	1707.003	233.391	4095	19.417
Ctrl MO NC-NC	Non Clone- Non Clone	h4b1	11.996	1899.994	207.351	4095	19.417
Ctrl MO NC-NC	Non Clone- Non Clone	h4b1	11.996	2018.898	198.507	4095	19.417
Ctrl MO NC-NC	Non Clone- Non Clone	h4b1	11.996	2099.865	187.2	4095	19.417
Ctrl MO NC-NC	Non Clone- Non Clone	h4b1	11.996	1990.377	173.628	4095	19.417
Ctrl MO NC-NC	Non Clone- Non Clone	h4b1	11.996	1247.394	194.492	4095	19.417
Ctrl MO NC-NC	Non Clone- Non Clone	h4b1	11.996	912.848	104.918	4095	19.417
Ctrl MO NC-NC	Non Clone- Non Clone
Ctrl MO NC-NC	Non Clone- Non Clone	h4b2	9.348	2309.201	438.393	4095	15.112
Ctrl MO NC-NC	Non Clone- Non Clone	h4b2	9.348	2201.496	410.444	4095	15.112
Ctrl MO NC-NC	Non Clone- Non Clone	h4b2	9.348	2002.068	234.083	4095	15.112
Ctrl MO NC-NC	Non Clone- Non Clone	h4b2	9.348	1521.84	124.442	4095	15.112
Ctrl MO NC-NC	Non Clone- Non Clone	h4b2	9.348	995.967	135.178	3995.439	15.112
Ctrl MO NC-NC	Non Clone- Non Clone	h4b2	9.348	538.926	66.099	4095	15.112
Ctrl MO NC-NC	Non Clone- Non Clone	h4b2	9.348	456.986	28.378	4095	15.112
Ctrl MO NC-NC	Non Clone- Non Clone
Ctrl MO NC-NC	Non Clone- Non Clone	h4b3	7.565	2106.2	400.908	4095	12.212
Ctrl MO NC-NC	Non Clone- Non Clone	h4b3	7.565	1537.45	200.772	4095	12.212
Ctrl MO NC-NC	Non Clone- Non Clone	h4b3	7.565	647.087	188.003	1510.531	12.212
Ctrl MO NC-NC	Non Clone- Non Clone	h4b3	9.348	849.566	130.81	4095	15.112
Ctrl MO NC-NC	Non Clone- Non Clone	h4b3	9.348	594.561	65.405	4074.027	15.112
Ctrl MO NC-NC	Non Clone- Non Clone	h4b3	9.348	369.711	42.479	2469.685	15.112
Ctrl MO NC-NC	Non Clone- Non Clone	h4b3	9.348	177.376	3.751	1086.444	15.112
Ctrl MO NC-NC	Non Clone- Non Clone	h4b3	9.348	115.289	6.241	445.795	15.112
Ctrl MO NC-NC	Non Clone- Non Clone
Ctrl MO NC-NC	Non Clone- Non Clone	h4b4	12.482	1543.638	217.065	4095	20.207
Ctrl MO NC-NC	Non Clone- Non Clone	h4b4	12.482	1507.49	277.715	4095	20.207
Ctrl MO NC-NC	Non Clone- Non Clone	h4b4	12.482	1469.541	294.388	4095	20.207
Ctrl MO NC-NC	Non Clone- Non Clone	h4b4	12.482	1449.864	160.063	4095	20.207
Ctrl MO NC-NC	Non Clone- Non Clone	h4b4	12.482	1265.351	83.728	4095	20.207
Ctrl MO NC-NC	Non Clone- Non Clone	h4b4	12.482	944.657	38.659	4095	20.207
Ctrl MO NC-NC	Non Clone- Non Clone	h4b4	12.482	667.143	20.506	4082.099	20.207
Ctrl MO NC-NC	Non Clone- Non Clone	h4b4	12.482	370.453	5.286	3257.801	20.207
Ctrl MO NC-NC	Non Clone- Non Clone	h4b4	12.482	197.124	5.886	1039.005	20.207
Ctrl MO NC-NC	Non Clone- Non Clone	h4b4	12.482	107.401	0.229	1430.014	20.207
Ctrl MO NC-NC	Non Clone- Non Clone
Ctrl MO NC-NC	Non Clone- Non Clone	h4b5	11.455	1581.882	45.536	4095	18.538
Ctrl MO NC-NC	Non Clone- Non Clone	h4b5	11.455	1708.761	76.079	4095	18.538
Ctrl MO NC-NC	Non Clone- Non Clone	h4b5	11.455	1652.541	94.674	4095	18.538
Ctrl MO NC-NC	Non Clone- Non Clone	h4b5	11.455	1331.173	95.955	4095	18.538
Ctrl MO NC-NC	Non Clone- Non Clone	h4b5	11.023	1544.661	112.831	4095	17.835
Ctrl MO NC-NC	Non Clone- Non Clone	h4b5	11.023	1133.636	67.045	4095	17.835
Ctrl MO NC-NC	Non Clone- Non Clone	h4b5	11.023	906.058	49.996	4095	17.835
Ctrl MO NC-NC	Non Clone- Non Clone	h4b5	11.023	626.356	48.739	2847.083	17.835
Ctrl MO NC-NC	Non Clone- Non Clone	h4b5	11.023	517.638	12.429	4095	17.835
Ctrl MO NC-NC	Non Clone- Non Clone
Ctrl MO NC-NC	Non Clone- Non Clone	h4b6	10.321	1402.064	138.057	4095	16.693
Ctrl MO NC-NC	Non Clone- Non Clone	h4b6	10.321	1466.155	142.68	4095	16.693
Ctrl MO NC-NC	Non Clone- Non Clone	h4b6	10.321	1344.976	86.61	4095	16.693
Ctrl MO NC-NC	Non Clone- Non Clone	h4b6	10.321	1258.017	78.41	4095	16.693
Ctrl MO NC-NC	Non Clone- Non Clone	h4b6	10.321	1190.959	104.473	4095	16.693
Ctrl MO NC-NC	Non Clone- Non Clone	h4b6	10.321	955.61	79.964	4074.226	16.693
Ctrl MO NC-NC	Non Clone- Non Clone	h4b6	10.321	677.846	55.364	3975.358	16.693
Ctrl MO NC-NC	Non Clone- Non Clone	h4b6	10.321	605.833	22.671	4018.673	16.693
Ctrl MO NC-NC	Non Clone- Non Clone	h5b1	4.755	1626.343	313.59	4095	7.644
Ctrl MO NC-NC	Non Clone- Non Clone	h5b1	4.755	1519.213	316.71	3951.414	7.644
Ctrl MO NC-NC	Non Clone- Non Clone	h5b1	4.755	1417.167	279.108	4095	7.644
Ctrl MO NC-NC	Non Clone- Non Clone	h5b1	4.755	1456.961	238.898	4095	7.644
Ctrl MO NC-NC	Non Clone- Non Clone	h5b1	4.755	1466.701	257.345	4095	7.644
Ctrl MO NC-NC	Non Clone- Non Clone	h5b1	4.755	1448.68	284.318	4095	7.644
Ctrl MO NC-NC	Non Clone- Non Clone	h5b1	4.755	1362.421	447.747	2974.049	7.644
Ctrl MO NC-NC	Non Clone- Non Clone
Ctrl MO NC-NC	Non Clone- Non Clone	h5b2	8.051	1497.288	202.518	4095	13.003
Ctrl MO NC-NC	Non Clone- Non Clone	h5b2	8.051	1471.108	184.564	4095	13.003
Ctrl MO NC-NC	Non Clone- Non Clone	h5b2	8.051	1260.927	183.094	4095	13.003
Ctrl MO NC-NC	Non Clone- Non Clone	h5b2	8.051	887.395	219.69	3632.163	13.003
Ctrl MO NC-NC	Non Clone- Non Clone	h5b2	8.051	781.854	189.175	2324.502	13.003
Ctrl MO NC-NC	Non Clone- Non Clone	h5b2	8.051	751.974	178.753	2280.869	13.003
Ctrl MO NC-NC	Non Clone- Non Clone	h5b2	8.051	782.669	231.747	1980.802	13.003
Ctrl MO NC-NC	Non Clone- Non Clone
Ctrl MO NC-NC	Non Clone- Non Clone	h5b3	9.132	1624.547	0	3792.261	14.76
Ctrl MO NC-NC	Non Clone- Non Clone	h5b3	9.132	1460.469	0	4093.57	14.76
Ctrl MO NC-NC	Non Clone- Non Clone	h5b3	9.132	1112.443	0	3834.334	14.76
Ctrl MO NC-NC	Non Clone- Non Clone	h5b3	9.132	789.968	0	2950.023	14.76
Ctrl MO NC-NC	Non Clone- Non Clone	h5b3	9.132	611.715	0	2082.453	14.76
Ctrl MO NC-NC	Non Clone- Non Clone	h5b3	9.132	735.54	0	2123.018	14.76
Ctrl MO NC-NC	Non Clone- Non Clone	h5b3	9.132	774.866	0	2193.291	14.76
Ctrl MO NC-NC	Non Clone- Non Clone
Ctrl MO NC-NC	Non Clone- Non Clone	h5b4	4.863	2313.309	233.59	4095	7.819
Ctrl MO NC-NC	Non Clone- Non Clone	h5b4	4.863	2123.102	267.596	4095	7.819
Ctrl MO NC-NC	Non Clone- Non Clone	h5b4	4.863	1617.797	273.095	4056.263	7.819
Ctrl MO NC-NC	Non Clone- Non Clone	h5b4	4.863	947.35	274.988	3221.762	7.819
Ctrl MO NC-NC	Non Clone- Non Clone	h5b4	4.863	408.648	87.122	1240.957	7.819
Ctrl MO NC-NC	Non Clone- Non Clone	h5b4	4.863	237.073	8.03	1163.249	7.819
Ctrl MO NC-NC	Non Clone- Non Clone
Ctrl MO NC-NC	Non Clone- Non Clone	h5b5	8.862	1997.285	152.707	4095	14.321
Ctrl MO NC-NC	Non Clone- Non Clone	h5b5	8.862	2082.013	149.889	4095	14.321
Ctrl MO NC-NC	Non Clone- Non Clone	h5b5	8.862	2013.733	96.146	4095	14.321
Ctrl MO NC-NC	Non Clone- Non Clone	h5b5	8.862	1563.166	180.301	4095	14.321
Ctrl MO NC-NC	Non Clone- Non Clone	h5b5	8.862	768.416	80.427	2324.793	14.321
Ctrl MO NC-NC	Non Clone- Non Clone	h5b5	8.862	501.562	56.393	1258.157	14.321
Ctrl MO NC-NC	Non Clone- Non Clone
Ctrl MO NC-NC	Non Clone- Non Clone	h5b6	7.997	1839.995	286.806	4095	12.915
Ctrl MO NC-NC	Non Clone- Non Clone	h5b6	7.997	2444.075	515.058	4095	12.915
Ctrl MO NC-NC	Non Clone- Non Clone	h5b6	7.997	2521.381	523.488	4095	12.915
Ctrl MO NC-NC	Non Clone- Non Clone	h5b6	7.997	1689.843	466.195	4095	12.915
Ctrl MO NC-NC	Non Clone- Non Clone	h5b6	7.997	1253.272	270.934	2991.993	12.915
Ctrl MO NC-NC	Non Clone- Non Clone	h5b6	7.997	908.065	151.665	2731.434	12.915
Ctrl MO NC-NC	Non Clone- Non Clone	h5b6	7.997	585.152	58.779	2209.512	12.915
Ctrl MO NC-NC	Non Clone- Non Clone
Ctrl MO NC-NC	Non Clone- Non Clone	h5b7	8.267	2034.162	288.405	4095	13.355
Ctrl MO NC-NC	Non Clone- Non Clone	h5b7	8.267	1862.86	203.197	4095	13.355
Ctrl MO NC-NC	Non Clone- Non Clone	h5b7	8.267	1194.659	166.183	4095	13.355
Ctrl MO NC-NC	Non Clone- Non Clone	h5b7	8.267	787.554	100.736	3110.792	13.355
Ctrl MO NC-NC	Non Clone- Non Clone	h5b7	8.267	481.479	56.621	1595.528	13.355
Ctrl MO NC-NC	Non Clone- Non Clone
Ctrl MO NC-NC	Non Clone- Non Clone	h5b8	9.942	1192.364	145.263	4095	16.078
Ctrl MO NC-NC	Non Clone- Non Clone	h5b8	9.942	1332.826	145.342	4095	16.078
Ctrl MO NC-NC	Non Clone- Non Clone	h5b8	9.942	1228.085	69.586	4095	16.078
Ctrl MO NC-NC	Non Clone- Non Clone	h5b8	9.942	1104.013	131.574	4095	16.078
Ctrl MO NC-NC	Non Clone- Non Clone	h5b8	9.942	969.861	101.351	4095	16.078
Ctrl MO NC-NC	Non Clone- Non Clone	h5b8	9.942	914.535	71.806	4095	16.078
Ctrl MO NC-NC	Non Clone- Non Clone	h5b8	9.942	873.635	142.814	4095	16.078
Ctrl MO NC-NC	Non Clone- Non Clone
Ctrl MO NC-NC	Non Clone- Non Clone	h5b9	9.24	2326.017	327.259	4095	14.936
Ctrl MO NC-NC	Non Clone- Non Clone	h5b9	9.24	2228.943	384.915	4095	14.936
Ctrl MO NC-NC	Non Clone- Non Clone	h5b9	9.24	1875.171	342.443	4095	14.936
Ctrl MO NC-NC	Non Clone- Non Clone	h5b9	9.24	1321.267	317.665	4095	14.936
Ctrl MO NC-NC	Non Clone- Non Clone	h5b9	9.24	893.746	128.616	4087.982	14.936
Ctrl MO NC-NC	Non Clone- Non Clone
Ctrl MO NC-NC	Non Clone- Non Clone	h5b10	7.727	1942.561	142.21	4095	12.476
Ctrl MO NC-NC	Non Clone- Non Clone	h5b10	7.727	1890.321	124.496	4095	12.476
Ctrl MO NC-NC	Non Clone- Non Clone	h5b10	7.727	1243.735	245.709	4095	12.476
Ctrl MO NC-NC	Non Clone- Non Clone	h5b10	7.727	980.572	178.001	2582.249	12.476
Ctrl MO NC-NC	Non Clone- Non Clone	h5b10	7.727	792.124	125.623	2199.428	12.476
Ctrl MO NC-NC	Non Clone- Non Clone	h5b10	7.727	559.341	71.995	1674.012	12.476
Ctrl MO NC-NC	Non Clone- Non Clone	h5b10	7.727	311.612	18.798	1295.289	12.476
Ctrl MO NC-NC	Non Clone- Non Clone
Ctrl MO NC-NC	Non Clone- Non Clone	h5b11	6.106	832.235	22.862	4095	9.84
Ctrl MO NC-NC	Non Clone- Non Clone	h5b11	6.106	1025.062	59.88	4095	9.84
Ctrl MO NC-NC	Non Clone- Non Clone	h5b11	6.106	823.069	45.537	4053.469	9.84
Ctrl MO NC-NC	Non Clone- Non Clone	h5b11	6.106	491.691	42.322	1342.87	9.84
Ctrl MO NC-NC	Non Clone- Non Clone	h5b11	6.106	364.497	47.576	934.725	9.84
Ctrl MO NC-NC	Non Clone- Non Clone
Ctrl MO NC-NC	Non Clone- Non Clone	h5b12	10.05	1649.312	241.702	4095	16.244
Ctrl MO NC-NC	Non Clone- Non Clone	h5b12	10.05	1764.318	205.483	4095	16.244
Ctrl MO NC-NC	Non Clone- Non Clone	h5b12	10.05	1767.46	184.855	4095	16.244
Ctrl MO NC-NC	Non Clone- Non Clone	h5b12	10.05	1418.964	136.71	4095	16.244
Ctrl MO NC-NC	Non Clone- Non Clone	h5b12	10.05	766.372	126.277	2941.035	16.244
Ctrl MO NC-NC	Non Clone- Non Clone	h5b12	10.05	550.312	121.563	1979.954	16.244
Ctrl MO NC-NC	Non Clone- Non Clone	h5b12	10.05	383.196	70.399	1656.501	16.244
Ctrl MO NC-NC	Non Clone- Non Clone	h6b1	9.618	1387.466	136.989	4095	15.551
Ctrl MO NC-NC	Non Clone- Non Clone	h6b1	9.618	1380.352	124.55	4095	15.551
Ctrl MO NC-NC	Non Clone- Non Clone	h6b1	9.618	1295.316	103.034	4095	15.551
Ctrl MO NC-NC	Non Clone- Non Clone	h6b1	9.618	1096.835	46.511	4095	15.551
Ctrl MO NC-NC	Non Clone- Non Clone	h6b1	9.618	980.879	65.838	4095	15.551
Ctrl MO NC-NC	Non Clone- Non Clone	h6b1	9.186	1488.174	149.783	4095	14.846
Ctrl MO NC-NC	Non Clone- Non Clone	h6b1	9.186	1052.961	106.853	4095	14.846
Ctrl MO NC-NC	Non Clone- Non Clone	h6b1	9.186	746.628	91.432	3728.949	14.846
Ctrl MO NC-NC	Non Clone- Non Clone	h6b1	9.186	523.576	84.55	2135.112	14.846
Ctrl MO NC-NC	Non Clone- Non Clone
Ctrl MO NC-NC	Non Clone- Non Clone	h6b2	5.674	1315.435	131.79	4092.809	9.137
Ctrl MO NC-NC	Non Clone- Non Clone	h6b2	5.674	1213.692	126.68	4090.293	9.137
Ctrl MO NC-NC	Non Clone- Non Clone	h6b2	5.674	991.63	86.945	4095	9.137
Ctrl MO NC-NC	Non Clone- Non Clone	h6b2	5.674	703.101	49.834	4095	9.137
Ctrl MO NC-NC	Non Clone- Non Clone	h6b2	6.646	804.424	111.42	4095	10.719
Ctrl MO NC-NC	Non Clone- Non Clone	h6b2	6.646	538.907	58.584	4095	10.719
Ctrl MO NC-NC	Non Clone- Non Clone	h6b2	6.646	470.967	68.616	2948.269	10.719
Ctrl MO NC-NC	Non Clone- Non Clone	h6b2	6.646	377.088	77.105	1228.939	10.719
Ctrl MO NC-NC	Non Clone- Non Clone	h6b2	6.646	383.589	67.944	1576.639	10.719
Ctrl MO NC-NC	Non Clone- Non Clone
Ctrl MO NC-NC	Non Clone- Non Clone	h6b3	6.646	1334.702	205.78	4095	10.719
Ctrl MO NC-NC	Non Clone- Non Clone	h6b3	6.646	1201.043	128.21	4095	10.719
Ctrl MO NC-NC	Non Clone- Non Clone	h6b3	6.646	954.642	86.44	4095	10.719
Ctrl MO NC-NC	Non Clone- Non Clone	h6b3	6.646	815.995	92.921	3998.669	10.719
Ctrl MO NC-NC	Non Clone- Non Clone	h6b3	6.646	552.004	35.924	3460.025	10.719
Ctrl MO NC-NC	Non Clone- Non Clone	h6b3	6.646	445.255	84.643	2802.959	10.719
Ctrl MO NC-NC	Non Clone- Non Clone	h6b3	6.646	299.128	21.396	1250.64	10.719
Ctrl MO NC-NC	Non Clone- Non Clone
Ctrl MO NC-NC	Non Clone- Non Clone	h6b4	10.591	977.273	123.832	4095	17.132
Ctrl MO NC-NC	Non Clone- Non Clone	h6b4	10.591	1389.279	178.512	4095	17.132
Ctrl MO NC-NC	Non Clone- Non Clone	h6b4	10.591	1528.297	280.97	4095	17.132
Ctrl MO NC-NC	Non Clone- Non Clone	h6b4	10.591	1498.254	170.068	4095	17.132
Ctrl MO NC-NC	Non Clone- Non Clone	h6b4	10.591	1415.407	161.662	4095	17.132
Ctrl MO NC-NC	Non Clone- Non Clone	h6b4	10.591	1202.392	98.969	4095	17.132
Ctrl MO NC-NC	Non Clone- Non Clone	h6b4	10.591	1014.608	119.039	4095	17.132
Ctrl MO NC-NC	Non Clone- Non Clone	h6b4	10.591	733.992	118.903	3135.51	17.132
Ctrl MO NC-NC	Non Clone- Non Clone	h6b4	10.591	493.654	79.856	2312.597	17.132
Ctrl MO NC-NC	Non Clone- Non Clone
Ctrl MO NC-NC	Non Clone- Non Clone	h6b5	9.078	1300.598	50.452	4095	14.672
Ctrl MO NC-NC	Non Clone- Non Clone	h6b5	9.078	1192.723	41.765	4095	14.672
Ctrl MO NC-NC	Non Clone- Non Clone	h6b5	9.078	1011.678	60.106	4095	14.672
Ctrl MO NC-NC	Non Clone- Non Clone	h6b5	9.24	1654.509	186.657	4095	14.936
Ctrl MO NC-NC	Non Clone- Non Clone	h6b5	9.24	1222.012	135.629	4095	14.936
Ctrl MO NC-NC	Non Clone- Non Clone	h6b5	9.24	695.182	84.438	4095	14.936
Ctrl MO NC-NC	Non Clone- Non Clone	h6b5	9.24	390.84	32.54	1984.179	14.936
Ctrl MO NC-NC	Non Clone- Non Clone
Ctrl MO NC-NC	Non Clone- Non Clone	h6b6	8.645	1951.534	232.951	4095	13.969
Ctrl MO NC-NC	Non Clone- Non Clone	h6b6	8.645	1965.817	295.001	4095	13.969
Ctrl MO NC-NC	Non Clone- Non Clone	h6b6	8.645	1806.993	266.62	4095	13.969
Ctrl MO NC-NC	Non Clone- Non Clone	h6b6	8.645	1557.306	165.971	4095	13.969
Ctrl MO NC-NC	Non Clone- Non Clone	h6b6	8.645	1241.516	218.132	4095	13.969
Ctrl MO NC-NC	Non Clone- Non Clone	h6b6	12.968	1636.82	174.018	4095	20.998
Ctrl MO NC-NC	Non Clone- Non Clone	h6b6	12.968	1241.587	99.947	4095	20.998
Ctrl MO NC-NC	Non Clone- Non Clone	h6b6	12.968	874.085	76.756	3891.578	20.998
Ctrl MO NC-NC	Non Clone- Non Clone	h6b6	12.968	683.894	55.109	2105.668	20.998
Ctrl MO NC-NC	Non Clone- Non Clone	h6b6	12.968	453.169	89.795	2318.957	20.998
Ctrl MO NC-NC	Non Clone- Non Clone
Ctrl MO NC-NC	Non Clone- Non Clone	h6b7	8.483	1837.057	169.75	4095	13.706
Ctrl MO NC-NC	Non Clone- Non Clone	h6b7	8.483	1849.058	154.06	4095	13.706
Ctrl MO NC-NC	Non Clone- Non Clone	h6b7	8.483	1742.602	115.319	4095	13.706
Ctrl MO NC-NC	Non Clone- Non Clone	h6b7	8.483	1302.246	48.067	4095	13.706
Ctrl MO NC-NC	Non Clone- Non Clone	h6b7	8.483	668.041	136.549	1962.489	13.706
Ctrl MO NC-NC	Non Clone- Non Clone	h6b7	8.483	441.746	41.556	2132.258	13.706
Ctrl MO NC-NC	Non Clone- Non Clone	h6b7	8.483	441.746	41.556	2132.258	13.706
Ctrl MO NC-NC	Non Clone- Non Clone	h6b7	8.483	361.741	21.31	2039.965	13.706
Ctrl MO NC-NC	Non Clone- Non Clone
Ctrl MO NC-NC	Non Clone- Non Clone	h7b1	11.617	2506.139	218.479	4095	18.802
Ctrl MO NC-NC	Non Clone- Non Clone	h7b1	11.617	1652.267	223.902	4095	18.802
Ctrl MO NC-NC	Non Clone- Non Clone	h7b1	11.617	578.631	75.01	2373.135	18.802
Ctrl MO NC-NC	Non Clone- Non Clone	h7b1	11.617	395.264	76.614	3762.889	18.802
Ctrl MO NC-NC	Non Clone- Non Clone	h7b1	11.617	257.818	17.989	4095	18.802
Ctrl MO NC-NC	Non Clone- Non Clone
Ctrl MO NC-NC	Non Clone- Non Clone	h7b2	9.618	1946.18	229.054	4095	15.551
Ctrl MO NC-NC	Non Clone- Non Clone	h7b2	9.618	1698.496	160.986	4095	15.551
Ctrl MO NC-NC	Non Clone- Non Clone	h7b2	9.618	920.792	172.632	3636.469	15.551
Ctrl MO NC-NC	Non Clone- Non Clone	h7b2	9.618	420.173	60.638	2480.165	15.551
Ctrl MO NC-NC	Non Clone- Non Clone	h7b2	9.618	331.299	24.661	2616.674	15.551
Ctrl MO NC-NC	Non Clone- Non Clone
Ctrl MO NC-NC	Non Clone- Non Clone	h7b3	11.455	2512.51	104.93	4095	18.538
Ctrl MO NC-NC	Non Clone- Non Clone	h7b3	11.455	2344.249	185.76	4095	18.538
Ctrl MO NC-NC	Non Clone- Non Clone	h7b3	11.455	1257.027	207.573	4095	18.538
Ctrl MO NC-NC	Non Clone- Non Clone	h7b3	11.455	852.259	155.56	3811.321	18.538
Ctrl MO NC-NC	Non Clone- Non Clone	h7b3	11.455	591.3	104.814	4079.833	18.538
Ctrl MO NC-NC	Non Clone- Non Clone
Ctrl MO NC-NC	Non Clone- Non Clone	h7b4	6.16	2726.377	641.176	4095	9.928
Ctrl MO NC-NC	Non Clone- Non Clone	h7b4	6.16	2110.881	585.482	4095	9.928
Ctrl MO NC-NC	Non Clone- Non Clone	h7b4	5.403	1565.897	144.872	4095	8.698
Ctrl MO NC-NC	Non Clone- Non Clone	h7b4	5.403	576.217	95.983	1399.347	8.698
Ctrl MO NC-NC	Non Clone- Non Clone	h7b4	5.403	404.698	107.077	2115.743	8.698
Ctrl MO NC-NC	Non Clone- Non Clone	h7b4	5.403	288.788	67.428	1970.738	8.698
Ctrl MO NC-NC	Non Clone- Non Clone
Ctrl MO NC-NC	Non Clone- Non Clone	h7b5	8.375	2804.651	316.701	4095	13.53
Ctrl MO NC-NC	Non Clone- Non Clone	h7b5	8.375	2113.039	545.829	4095	13.53
Ctrl MO NC-NC	Non Clone- Non Clone	h7b5	8.375	1246.678	130.604	4095	13.53
Ctrl MO NC-NC	Non Clone- Non Clone	h7b5	8.375	966.442	90.927	4095	13.53
Ctrl MO NC-NC	Non Clone- Non Clone	h7b5	8.375	683.746	26.89	4094.318	13.53
Ctrl MO NC-NC	Non Clone- Non Clone	h7b5	8.375	437.539	15.074	4085.914	13.53
Ctrl MO NC-NC	Non Clone- Non Clone	h7b5	8.375	212.098	2.094	1452.956	13.53
Ctrl MO NC-NC	Non Clone- Non Clone	h7b5	8.375	139.797	0.404	921.87	13.53
Ctrl MO NC-NC	Non Clone- Non Clone
Ctrl MO NC-NC	Non Clone- Non Clone	h7b6	11.509	2012.948	156.488	4095	18.626
Ctrl MO NC-NC	Non Clone- Non Clone	h7b6	11.509	2110.346	138.385	4095	18.626
Ctrl MO NC-NC	Non Clone- Non Clone	h7b6	11.509	2206.083	130.9	4095	18.626
Ctrl MO NC-NC	Non Clone- Non Clone	h7b6	11.509	1997.69	154.147	4095	18.626
Ctrl MO NC-NC	Non Clone- Non Clone	h7b6	11.509	1022.257	136.417	4095	18.626
Ctrl MO NC-NC	Non Clone- Non Clone	h7b6	11.509	546.375	46.022	4095	18.626
Ctrl MO NC-NC	Non Clone- Non Clone	h7b6	11.509	456.961	59.26	4095	18.626
Ctrl MO NC-NC	Non Clone- Non Clone
Ctrl MO NC-NC	Non Clone- Non Clone	h7b7	7.457	2573.714	276.374	4095	12.037
Ctrl MO NC-NC	Non Clone- Non Clone	h7b7	7.457	2130.655	318.682	4095	12.037
Ctrl MO NC-NC	Non Clone- Non Clone	h7b7	7.457	1186.113	165.911	4095	12.037
Ctrl MO NC-NC	Non Clone- Non Clone	h7b7	7.457	826.805	141.431	3947.036	12.037
Ctrl MO NC-NC	Non Clone- Non Clone	h7b7	7.457	511.661	102.422	1612.054	12.037
Ctrl MO NC-NC	Non Clone- Non Clone	h7b7	7.457	333.417	37.836	3944.523	12.037
Ctrl MO NC-NC	Non Clone- Non Clone
Ctrl MO NC-NC	Non Clone- Non Clone	h7b8	7.889	1960.979	51.359	4095	12.74
Ctrl MO NC-NC	Non Clone- Non Clone	h7b8	7.889	1650	67.325	4095	12.74
Ctrl MO NC-NC	Non Clone- Non Clone	h7b8	7.889	648.287	60.003	2760.338	12.74
Ctrl MO NC-NC	Non Clone- Non Clone	h7b8	7.889	396.632	32.797	1416.754	12.74
Ctrl MO NC-NC	Non Clone- Non Clone	h7b8	7.889	221.278	21.616	810.205	12.74
Ctrl MO NC-NC	Non Clone- Non Clone
Ctrl MO NC-NC	Non Clone- Non Clone	h7b9	10.591	1964.097	78.351	4095	17.132
Ctrl MO NC-NC	Non Clone- Non Clone	h7b9	9.996	1765.803	68.448	4090.888	16.166
Ctrl MO NC-NC	Non Clone- Non Clone	h7b9	9.996	580.009	113.169	2668.691	16.166
Ctrl MO NC-NC	Non Clone- Non Clone	h7b9	9.996	359.144	56.67	1485.625	16.166
Ctrl MO NC-NC	Non Clone- Non Clone
Ctrl MO NC-NC	Non Clone- Non Clone	h7b10	6.97	2701.596	422.241	4095	11.246
Ctrl MO NC-NC	Non Clone- Non Clone	h7b10	6.97	1883.025	505.259	4093.285	11.246
Ctrl MO NC-NC	Non Clone- Non Clone	h7b10	6.97	1302.766	385.229	4095	11.246
Ctrl MO NC-NC	Non Clone- Non Clone	h7b10	6.97	984.069	219.263	4095	11.246
Ctrl MO NC-NC	Non Clone- Non Clone	h7b10	6.97	832.211	60.666	4095	11.246
Ctrl MO NC-NC	Non Clone- Non Clone
Ctrl MO NC-NC	Non Clone- Non Clone	h7b11	6.646	2891.653	367.716	4095	10.719
Ctrl MO NC-NC	Non Clone- Non Clone	h7b11	6.646	2297.996	492.788	4095	10.719
Ctrl MO NC-NC	Non Clone- Non Clone	h7b11	6.268	2038.789	405.257	4095	10.104
Ctrl MO NC-NC	Non Clone- Non Clone	h7b11	6.268	769.734	233.886	3773.581	10.104
Ctrl MO NC-NC	Non Clone- Non Clone	h7b11	6.268	508.58	104.756	2643.893	10.104
Ctrl MO NC-NC	Non Clone- Non Clone	h7b11	6.268	331.873	50.257	1734.449	10.104
Ctrl MO NC-NC	Non Clone- Non Clone	h7b11	6.268	241.832	33.202	1339.962	10.104
Ctrl MO NC-NC	Non Clone- Non Clone
Ctrl MO NC-NC	Non Clone- Non Clone	h7b12	9.024	2257.058	213.623	4095	14.584
Ctrl MO NC-NC	Non Clone- Non Clone	h7b12	9.024	1929.437	128.667	4095	14.584
Ctrl MO NC-NC	Non Clone- Non Clone	h7b12	9.024	857.485	53.386	4095	14.584
Ctrl MO NC-NC	Non Clone- Non Clone	h7b12	9.024	577.074	40.144	4066.956	14.584
Ctrl MO NC-NC	Non Clone- Non Clone	h7b12	9.024	343.944	27.168	2401.294	14.584
Ctrl MO NC-NC	Non Clone- Non Clone	h7b12	9.024	192.001	11.42	1052.537	14.584
Ecad MO C-C	Clone- Clone	h1b1	3.512	397.471	50.524	1704.795	5.623
Ecad MO C-C	Clone- Clone	h1b1	3.512	276.298	28.649	901.153	5.623
Ecad MO C-C	Clone- Clone	h1b1	3.512	211.713	27.491	987.877	5.623
Ecad MO C-C	Clone- Clone	h1b1	7.457	256.756	10.897	1460.787	12.037
Ecad MO C-C	Clone- Clone	h1b1	7.457	231.413	8.99	1418.903	12.037
Ecad MO C-C	Clone- Clone	h1b1	7.457	225.093	9.067	1631.459	12.037
Ecad MO C-C	Clone- Clone	h1b1	7.295	252.41	4.713	1424.967	11.773
Ecad MO C-C	Clone- Clone	h1b1	7.295	203.468	0.732	1231.57	11.773
Ecad MO C-C	Clone- Clone	h1b1	7.295	172.868	2.12	1023.136	11.773
Ecad MO C-C	Clone- Clone	h1b1	7.295	154.956	2.1	938.853	11.773
Ecad MO C-C	Clone- Clone	h1b1	7.295	129.836	0.017	729.391	11.773
Ecad MO C-C	Clone- Clone
Ecad MO C-C	Clone- Clone	h1b2	6.376	404.667	10.15	3515.363	10.279
Ecad MO C-C	Clone- Clone	h1b2	6.376	375.837	16.699	2379.37	10.279
Ecad MO C-C	Clone- Clone	h1b2	6.376	321.742	9.567	2448.444	10.279
Ecad MO C-C	Clone- Clone	h1b2	6.376	224.895	8.93	3998.774	10.279
Ecad MO C-C	Clone- Clone	h1b2	6.376	155.978	4.047	972.529	10.279
Ecad MO C-C	Clone- Clone	h1b2	6.376	135.803	2.359	915.963	10.279
Ecad MO C-C	Clone- Clone	h1b2	6.376	118.809	1.156	1583.871	10.279
Ecad MO C-C	Clone- Clone	h2b1	9.672	586.251	23.193	4095	15.639
Ecad MO C-C	Clone- Clone	h2b1	9.672	624.863	46.389	4074.137	15.639
Ecad MO C-C	Clone- Clone	h2b1	9.672	515.292	9.563	4095	15.639
Ecad MO C-C	Clone- Clone	h2b1	9.672	334.743	13.33	3896.824	15.639
Ecad MO C-C	Clone- Clone	h2b1	9.672	219.096	1.671	2242.525	15.639
Ecad MO C-C	Clone- Clone
Ecad MO C-C	Clone- Clone	h2b2	6.052	427.704	37.278	3412.054	9.752
Ecad MO C-C	Clone- Clone	h2b2	6.052	419.884	48.902	3949.725	9.752
Ecad MO C-C	Clone- Clone	h2b2	6.052	349.618	59.967	1289.896	9.752
Ecad MO C-C	Clone- Clone	h2b2	6.052	452.467	67.97	3867.947	9.752
Ecad MO C-C	Clone- Clone
Ecad MO C-C	Clone- Clone	h2b3	11.131	539.119	64.987	4095	18.011
Ecad MO C-C	Clone- Clone	h2b3	11.131	489.143	25.963	4095	18.011
Ecad MO C-C	Clone- Clone	h2b3	11.131	487.059	34.127	4095	18.011
Ecad MO C-C	Clone- Clone	h2b3	11.131	370.232	14.026	3060.48	18.011
Ecad MO C-C	Clone- Clone	h2b3	11.131	295.437	5.511	2318.81	18.011
Ecad MO C-C	Clone- Clone
Ecad MO C-C	Clone- Clone	h2b4	10.861	467.856	24.184	4095	17.571
Ecad MO C-C	Clone- Clone	h2b4	10.861	429.974	21.658	4095	17.571
Ecad MO C-C	Clone- Clone	h2b4	10.861	331.999	29.895	2694.437	17.571
Ecad MO C-C	Clone- Clone	h2b4	10.861	232.377	17.779	2009.957	17.571
Ecad MO C-C	Clone- Clone
Ecad MO C-C	Clone- Clone	h2b5	12.428	822.043	45.774	4095	20.12
Ecad MO C-C	Clone- Clone	h2b5	12.428	668.615	61.635	4095	20.12
Ecad MO C-C	Clone- Clone	h2b5	12.428	520.588	10.278	4095	20.12
Ecad MO C-C	Clone- Clone	h2b5	12.428	342.509	28.093	3471.565	20.12
Ecad MO C-C	Clone- Clone	h2b5	12.428	268.541	12.26	1712.048	20.12
Ecad MO C-C	Clone- Clone
Ecad MO C-C	Clone- Clone	h3b1	8.051	688.153	38.438	4095	13.002
Ecad MO C-C	Clone- Clone	h3b1	8.051	742.664	20.983	4095	13.002
Ecad MO C-C	Clone- Clone	h3b1	8.051	564.284	15.697	4095	13.002
Ecad MO C-C	Clone- Clone	h3b1	8.051	322.852	6.47	3134.734	13.002
Ecad MO C-C	Clone- Clone	h3b1	8.051	175.139	2.5	3010.046	13.002
Ecad MO C-C	Clone- Clone
Ecad MO C-C	Clone- Clone	h3b2	13.509	712.63	28.113	4095	21.877
Ecad MO C-C	Clone- Clone	h3b2	13.509	730.195	19.976	4095	21.877
Ecad MO C-C	Clone- Clone	h3b2	13.509	568.186	26.848	4095	21.877
Ecad MO C-C	Clone- Clone	h3b2	13.509	325.242	18.156	2093.541	21.877
Ecad MO C-C	Clone- Clone	h3b2	13.509	192.049	1.986	2901.629	21.877
Ecad MO C-C	Clone- Clone
Ecad MO C-C	Clone- Clone	h3b3	8.7	565.13	20.381	2702.768	14.057
Ecad MO C-C	Clone- Clone	h3b3	8.7	598.086	71.219	4095	14.057
Ecad MO C-C	Clone- Clone	h3b3	8.7	608.084	50.203	4095	14.057
Ecad MO C-C	Clone- Clone	h3b3	8.7	569.262	22.198	4095	14.057
Ecad MO C-C	Clone- Clone	h3b3	8.7	359.563	6.098	4085.281	14.057
Ecad MO C-C	Clone- Clone
Ecad MO C-C	Clone- Clone	h3b4	5.511	930.759	85.131	4095	8.874
Ecad MO C-C	Clone- Clone	h3b4	5.511	814.901	116.013	4095	8.874
Ecad MO C-C	Clone- Clone	h3b4	5.511	381.683	66.275	1415.649	8.874
Ecad MO C-C	Clone- Clone	h3b4	5.511	263.58	13.947	1484.829	8.874
Ecad MO C-C	Clone- Clone	h3b4	5.511	230.862	28.899	1817.592	8.874
Ecad MO C-C	Clone- Clone
Ecad MO C-C	Clone- Clone	h3b5	2.918	1333.308	299.346	4095	4.657
Ecad MO C-C	Clone- Clone	h3b5	2.918	1070.03	332.438	3641.576	4.657
Ecad MO C-C	Clone- Clone	h3b5	2.918	884.822	167.082	2311.596	4.657
Ecad MO C-C	Clone- Clone	h3b5	2.918	528.737	142.292	2771.416	4.657
Ecad MO C-C	Clone- Clone	h3b5	2.918	238.437	41.708	842.188	4.657
Ecad MO C-C	Clone- Clone	h3b5	2.918	153.328	3.017	665.945	4.657
Ecad MO C-C	Clone- Clone
Ecad MO C-C	Clone- Clone	h3b6	10.807	1201.191	174.176	4095	17.484
Ecad MO C-C	Clone- Clone	h3b6	10.807	1081.935	127.107	4054.207	17.484
Ecad MO C-C	Clone- Clone	h3b6	10.807	745.301	99.968	4085.647	17.484
Ecad MO C-C	Clone- Clone	h3b6	10.807	331.383	25.495	2101.471	17.484
Ecad MO C-C	Clone- Clone	h3b6	10.807	166.995	9.022	1637.542	17.484
Ecad MO C-C	Clone- Clone
Ecad MO C-C	Clone- Clone	h3b7	9.348	963.882	103.402	4095	15.112
Ecad MO C-C	Clone- Clone	h3b7	9.348	939.188	117.735	4095	15.112
Ecad MO C-C	Clone- Clone	h3b7	9.348	817.681	87.921	4095	15.112
Ecad MO C-C	Clone- Clone	h3b7	9.348	632.79	65.736	4095	15.112
Ecad MO C-C	Clone- Clone	h3b7	9.348	335.083	37.947	2979.649	15.112
Ecad MO C-C	Clone- Clone	h3b7	9.348	213.292	9.96	3664.186	15.112
Ecad MO C-C	Clone- Clone
Ecad MO C-C	Clone- Clone	h3b8	9.672	1138.101	129.754	4095	15.639
Ecad MO C-C	Clone- Clone	h3b8	9.672	1115.936	150.152	4095	15.639
Ecad MO C-C	Clone- Clone	h3b8	9.672	1061.809	222.783	4095	15.639
Ecad MO C-C	Clone- Clone	h3b8	9.672	899.525	130.092	4095	15.639
Ecad MO C-C	Clone- Clone	h3b8	9.672	785.888	177.276	4095	15.639
Ecad MO C-C	Clone- Clone	h3b8	9.672	776.704	35.873	4095	15.639
Ecad MO C-C	Clone- Clone
Ecad MO C-C	Clone- Clone	h3b9	8.754	1130.305	98.439	4095	14.145
Ecad MO C-C	Clone- Clone	h3b9	8.754	794.882	89.382	4095	14.145
Ecad MO C-C	Clone- Clone	h3b9	8.754	752.371	67.842	3954.435	14.145
Ecad MO C-C	Clone- Clone	h3b9	8.754	803.975	78.197	3542.912	14.145
Ecad MO C-C	Clone- Clone
Ecad MO C-C	Clone- Clone	h3b10	7.943	908.748	92.766	4095	12.827
Ecad MO C-C	Clone- Clone	h3b10	7.943	926.805	113.807	4095	12.827
Ecad MO C-C	Clone- Clone	h3b10	7.943	909.41	50.698	4033.774	12.827
Ecad MO C-C	Clone- Clone	h3b10	7.943	567.943	32.58	3323.261	12.827
Ecad MO C-C	Clone- Clone	h3b10	7.943	491.369	72.857	4095	12.827
Ecad MO C-C	Clone- Clone	h3b10	7.943	491.501	46.622	4095	12.827
Ecad MO C-C	Clone- Clone
Ecad MO C-C	Clone- Clone	h3b11	8.7	683.099	90.541	3740.177	14.057
Ecad MO C-C	Clone- Clone	h3b11	8.7	698.98	87.884	4051.152	14.057
Ecad MO C-C	Clone- Clone	h3b11	8.7	638.173	79.102	3152.282	14.057
Ecad MO C-C	Clone- Clone	h3b11	8.7	560.704	60.409	2688.148	14.057
Ecad MO C-C	Clone- Clone	h3b11	8.7	560.156	62.13	2237.372	14.057
Ecad MO C-C	Clone- Clone
Ecad MO C-C	Clone- Clone	h3b12	6.484	798.04	111.724	3606.55	10.455
Ecad MO C-C	Clone- Clone	h3b12	6.484	759.755	82.902	3831.427	10.455
Ecad MO C-C	Clone- Clone	h3b12	6.484	755.427	66.342	4095	10.455
Ecad MO C-C	Clone- Clone	h3b12	6.214	1125.732	65.581	4095	10.016
Ecad MO C-C	Clone- Clone	h3b12	6.214	911.171	87.937	4095	10.016
Ecad MO C-C	Clone- Clone	h3b12	6.214	828.827	97.547	4095	10.016
Ecad MO C-C	Clone- Clone	h3b12	6.214	724.977	47.81	3950.602	10.016
Ecad MO C-C	Clone- Clone	h4b1	10.591	642.636	39.004	3780.424	17.131
Ecad MO C-C	Clone- Clone	h4b1	10.591	626.905	55.043	4095	17.131
Ecad MO C-C	Clone- Clone	h4b1	10.591	571.692	22.605	4095	17.131
Ecad MO C-C	Clone- Clone	h4b1	10.591	401.667	14.906	4095	17.131
Ecad MO C-C	Clone- Clone	h4b1	10.591	295.501	0.821	2544.785	17.131
Ecad MO C-C	Clone- Clone
Ecad MO C-C	Clone- Clone	h4b2	9.348	874.268	69.066	4095	15.112
Ecad MO C-C	Clone- Clone	h4b2	9.348	835.965	76.565	4094.162	15.112
Ecad MO C-C	Clone- Clone	h4b2	9.348	625.842	36.788	2646.681	15.112
Ecad MO C-C	Clone- Clone	h4b2	9.348	304.418	31.609	1653.707	15.112
Ecad MO C-C	Clone- Clone	h4b2	9.348	215.363	5.529	1214.055	15.112
Ecad MO C-C	Clone- Clone
Ecad MO C-C	Clone- Clone	h4b3	11.131	672.239	16.581	4095	18.011
Ecad MO C-C	Clone- Clone	h4b3	11.131	651.241	13.163	4095	18.011
Ecad MO C-C	Clone- Clone	h4b3	11.131	386.708	11.556	3389.948	18.011
Ecad MO C-C	Clone- Clone	h4b3	11.131	286.955	7.514	1839.043	18.011
Ecad MO C-C	Clone- Clone	h4b3	11.131	282.498	0.738	3696.05	18.011
Ecad MO C-C	Clone- Clone
Ecad MO C-C	Clone- Clone	h4b4	8.429	437.453	48.013	4095	13.618
Ecad MO C-C	Clone- Clone	h4b4	8.429	538.6	34.787	3996.526	13.618
Ecad MO C-C	Clone- Clone	h4b4	8.429	418.329	45.122	2828.558	13.618
Ecad MO C-C	Clone- Clone	h4b4	8.429	272.365	28.46	1269.244	13.618
Ecad MO C-C	Clone- Clone	h4b4	8.429	244.536	17.396	1618.529	13.618
Ecad MO C-C	Clone- Clone
Ecad MO C-C	Clone- Clone	h4b5	11.023	623.713	26.034	4095	17.835
Ecad MO C-C	Clone- Clone	h4b5	11.023	388.137	20.881	4019.745	17.835
Ecad MO C-C	Clone- Clone	h4b5	11.023	287.637	24.245	1533.06	17.835
Ecad MO C-C	Clone- Clone	h4b5	11.023	276.79	8.077	1913.59	17.835
Ecad MO C-C	Clone- Clone	h4b5	11.023	243.082	0.714	2008.89	17.835
Ecad MO C-C	Clone- Clone
Ecad MO C-C	Clone- Clone	h4b6	9.564	793.209	30.659	4095	15.463
Ecad MO C-C	Clone- Clone	h4b6	9.564	719.167	84.839	4095	15.463
Ecad MO C-C	Clone- Clone	h4b6	9.564	524.732	78.9	3280.477	15.463
Ecad MO C-C	Clone- Clone	h4b6	9.564	463.461	50.41	1993.797	15.463
Ecad MO C-C	Clone- Clone	h4b6	9.564	512.83	48.223	3920.71	15.463
Ecad MO C-C	Clone- Clone
Ecad MO C-C	Clone- Clone	h4b7	9.672	634.756	48.619	4095	15.639
Ecad MO C-C	Clone- Clone	h4b7	9.672	578.721	25.066	4095	15.639
Ecad MO C-C	Clone- Clone	h4b7	9.672	474.728	29.343	4047.87	15.639
Ecad MO C-C	Clone- Clone	h4b7	9.672	401.049	29.429	3951.374	15.639
Ecad MO C-C	Clone- Clone	h4b7	9.672	400.139	34.004	3463.209	15.639
Ecad MO C-C	Clone- Clone
Ecad MO C-C	Clone- Clone	h4b8	13.076	583.26	77.674	3081.702	21.174
Ecad MO C-C	Clone- Clone	h4b8	13.076	600.737	61.507	3157.92	21.174
Ecad MO C-C	Clone- Clone	h4b8	13.076	558.032	29.889	3685.54	21.174
Ecad MO C-C	Clone- Clone	h4b8	13.076	516.191	41.103	4080.22	21.174
Ecad MO C-C	Clone- Clone	h4b8	13.076	448.871	19.107	2301.823	21.174
Ecad MO C-C	Clone- Clone
Ecad MO C-C	Clone- Clone	h4b9	7.781	839.533	60.272	4095	12.564
Ecad MO C-C	Clone- Clone	h4b9	7.781	1024.781	46.422	4095	12.564
Ecad MO C-C	Clone- Clone	h4b9	7.781	662.031	45.904	4095	12.564
Ecad MO C-C	Clone- Clone	h4b9	7.781	422.111	26.078	2943.417	12.564
Ecad MO C-C	Clone- Clone	h4b9	7.781	332.94	6.614	2474.26	12.564
Ecad MO C-C	Clone- Clone
Ecad MO C-C	Clone- Clone	h4b10	12.482	814.275	29.034	4095	20.207
Ecad MO C-C	Clone- Clone	h4b10	12.482	843.135	19.712	4095	20.207
Ecad MO C-C	Clone- Clone	h4b10	12.482	578.331	13.944	3923.737	20.207
Ecad MO C-C	Clone- Clone	h4b10	12.482	395.957	11.454	4025.816	20.207
Ecad MO C-C	Clone- Clone	h4b10	12.482	327.866	1.589	4095	20.207
Ecad MO C-C	Clone- Clone	h5b1	11.077	774.232	20.069	4095	17.923
Ecad MO C-C	Clone- Clone	h5b1	11.077	688.255	35.67	4095	17.923
Ecad MO C-C	Clone- Clone	h5b1	11.077	498.397	22.356	3954.978	17.923
Ecad MO C-C	Clone- Clone	h5b1	11.077	318.771	10.757	3052.932	17.923
Ecad MO C-C	Clone- Clone	h5b1	11.077	206.087	1.466	2171.288	17.923
Ecad MO C-C	Clone- Clone	h5b1	11.077	171.091	1.381	2077.345	17.923
Ecad MO C-C	Clone- Clone
Ecad MO C-C	Clone- Clone	h5b2	6.97	942.123	97.368	4095	11.246
Ecad MO C-C	Clone- Clone	h5b2	6.97	719.806	49.399	4095	11.246
Ecad MO C-C	Clone- Clone	h5b2	6.97	475.38	31.248	3795.26	11.246
Ecad MO C-C	Clone- Clone	h5b2	6.97	287.656	27.115	1445.578	11.246
Ecad MO C-C	Clone- Clone	h5b2	6.97	186.694	11.666	2247.14	11.246
Ecad MO C-C	Clone- Clone
Ecad MO C-C	Clone- Clone	h5b3	8.97	433.68	19.277	2576.004	14.497
Ecad MO C-C	Clone- Clone	h5b3	8.97	348.08	29.058	1816.266	14.497
Ecad MO C-C	Clone- Clone	h5b3	8.97	298.344	22.656	1410.119	14.497
Ecad MO C-C	Clone- Clone	h5b3	8.97	302.604	3.693	3790.518	14.497
Ecad MO C-C	Clone- Clone	h5b3	8.97	408.656	3.815	4094.4	14.497
Ecad MO C-C	Clone- Clone	h5b3	8.97	428.239	2.736	4093.244	14.497
Ecad MO C-C	Clone- Clone	h5b3	8.97	429.769	1.574	4089.099	14.497
Ecad MO C-C	Clone- Clone
Ecad MO C-C	Clone- Clone	h5b4	8.808	987.945	85.563	4095	14.233
Ecad MO C-C	Clone- Clone	h5b4	8.808	1112.817	72.413	4095	14.233
Ecad MO C-C	Clone- Clone	h5b4	8.808	1172.196	125.964	4095	14.233
Ecad MO C-C	Clone- Clone	h5b4	8.808	747.136	102.122	4092.658	14.233
Ecad MO C-C	Clone- Clone	h5b4	8.808	630.147	105.01	3911.474	14.233
Ecad MO C-C	Clone- Clone	h5b4	8.808	567.128	58.093	3584.33	14.233
Ecad MO C-C	Clone- Clone	h5b4	8.808	463.136	37.926	3830.063	14.233
Ecad MO C-C	Clone- Clone
Ecad MO C-C	Clone- Clone	h5b5	12.752	676.648	76.682	3728.568	20.647
Ecad MO C-C	Clone- Clone	h5b5	12.752	748.555	42.411	4095	20.647
Ecad MO C-C	Clone- Clone	h5b5	12.752	558.092	38.804	4095	20.647
Ecad MO C-C	Clone- Clone	h5b5	12.752	432.077	51.301	4095	20.647
Ecad MO C-C	Clone- Clone	h5b5	12.752	328.194	3.29	3624.488	20.647
Ecad MO C-C	Clone- Clone	h5b5	12.752	211.692	11.61	2466.342	20.647
Ecad MO C-C	Clone- Clone	h5b5	12.752	152.239	0.28	2023.019	20.647
Ecad MO C-C	Clone- Clone
Ecad MO C-C	Clone- Clone	h5b6	8.375	452.554	7.647	3866.877	13.53
Ecad MO C-C	Clone- Clone	h5b6	8.375	340.488	22.609	3250.219	13.53
Ecad MO C-C	Clone- Clone	h5b6	8.375	213.965	1.247	1154.114	13.53
Ecad MO C-C	Clone- Clone	h5b6	8.375	148.848	4.066	964.776	13.53
Ecad MO C-C	Clone- Clone
Ecad MO C-C	Clone- Clone	h5b7	6.862	840.965	45.373	4095	11.07
Ecad MO C-C	Clone- Clone	h5b7	6.862	678.937	21.549	4094.927	11.07
Ecad MO C-C	Clone- Clone	h5b7	6.862	611.762	4.127	4072.704	11.07
Ecad MO C-C	Clone- Clone	h5b7	6.862	536.9	18.135	4095	11.07
Ecad MO C-C	Clone- Clone	h5b7	6.862	382.663	2.48	4006.332	11.07
Ecad MO C-C	Clone- Clone	h5b7	6.862	212.902	1.535	1594.57	11.07
Ecad MO C-C	Clone- Clone	h5b7	6.862	192.974	0	1772.028	11.07
Ecad MO C-C	Clone- Clone	h5b7	6.862	176.025	0.251	2711.252	11.07
Ecad MO C-C	Clone- Clone
Ecad MO C-C	Clone- Clone	h5b8	9.348	583.735	54.051	3697.973	15.11
Ecad MO C-C	Clone- Clone	h5b8	9.348	480.055	15.131	4088.127	15.11
Ecad MO C-C	Clone- Clone	h5b8	9.348	345.153	28.415	4095	15.11
Ecad MO C-C	Clone- Clone	h5b8	9.348	255.795	16.146	2471.703	15.11
Ecad MO C-C	Clone- Clone	h5b8	9.348	191.362	18.998	1171.132	15.11
Ecad MO C-C	Clone- Clone	h5b8	9.348	151.147	2.281	918.458	15.11
Ecad MO C-C	Clone- Clone	h5b8	9.348	81.543	0.405	618.657	15.11
Ecad MO C-C	Clone- Clone
Ecad MO C-C	Clone- Clone	h5b9	8.97	1108.369	60.66	4095	14.495
Ecad MO C-C	Clone- Clone	h5b9	8.97	878.803	32.8	4095	14.495
Ecad MO C-C	Clone- Clone	h5b9	8.97	677.746	10.041	4095	14.495
Ecad MO C-C	Clone- Clone	h5b9	8.97	527.929	14.848	3972.844	14.495
Ecad MO C-C	Clone- Clone	h5b9	8.97	355.4	6.216	3790.421	14.495
Ecad MO C-C	Clone- Clone	h5b9	8.97	201.48	0.876	1759.821	14.495
Ecad MO C-C	Clone- Clone	h5b9	8.97	90.647	0.275	565.055	14.495
Ecad MO C-C	Clone- Clone	h5b9	8.97	70.857	0.404	322.061	14.495
Ecad MO C-C	Clone- Clone
Ecad MO C-C	Clone- Clone	h5b10	8.375	752.377	64.59	3702.558	13.53
Ecad MO C-C	Clone- Clone	h5b10	8.375	878.896	115.101	4078.268	13.53
Ecad MO C-C	Clone- Clone	h5b10	8.375	782.677	78.291	4095	13.53
Ecad MO C-C	Clone- Clone	h5b10	8.375	682.066	51.845	4095	13.53
Ecad MO C-C	Clone- Clone	h5b10	8.375	540.478	29.956	4095	13.53
Ecad MO C-C	Clone- Clone	h5b10	8.375	482.934	28.707	4095	13.53
Ecad MO C-C	Clone- Clone	h5b10	8.375	381.034	14.237	4012.199	13.53
Ecad MO C-C	Clone- Clone	h5b10	8.375	413.514	8.469	4095	13.53
Ecad MO C-C	Clone- Clone	h6b1	11.725	871.683	81.903	4085.679	18.977
Ecad MO C-C	Clone- Clone	h6b1	11.725	728.209	67.536	4090.859	18.977
Ecad MO C-C	Clone- Clone	h6b1	11.725	550.774	61.881	4095	18.977
Ecad MO C-C	Clone- Clone	h6b1	11.725	434.356	44.29	3833.532	18.977
Ecad MO C-C	Clone- Clone	h6b1	11.725	299.58	38.32	1881.292	18.977
Ecad MO C-C	Clone- Clone	h6b1	11.725	311.282	18.828	2271.275	18.977
Ecad MO C-C	Clone- Clone
Ecad MO C-C	Clone- Clone	h6b2	10.05	910.033	119.989	4095	16.254
Ecad MO C-C	Clone- Clone	h6b2	10.05	673.885	90.513	4060.416	16.254
Ecad MO C-C	Clone- Clone	h6b2	10.05	464.97	40.094	2376.174	16.254
Ecad MO C-C	Clone- Clone	h6b2	10.05	327.347	26.824	4072.922	16.254
Ecad MO C-C	Clone- Clone	h6b2	10.05	286.965	7.619	2868.36	16.254
Ecad MO C-C	Clone- Clone	h7b1	10.483	636.256	25.951	4095	16.957
Ecad MO C-C	Clone- Clone	h7b1	10.483	641.75	8.642	4095	16.957
Ecad MO C-C	Clone- Clone	h7b1	10.483	621.769	24.154	4095	16.957
Ecad MO C-C	Clone- Clone	h7b1	10.483	584.975	7.65	3911.909	16.957
Ecad MO C-C	Clone- Clone	h7b1	10.483	506.926	42.706	3218.848	16.957
Ecad MO C-C	Clone- Clone	h7b1	10.483	434.191	43.101	3302.343	16.957
Ecad MO C-C	Clone- Clone	h7b1	10.483	463.397	20.619	3456.506	16.957
Ecad MO C-C	Clone- Clone	h7b1	10.483	588.787	25.717	4095	16.957
Ecad MO NC-C	Non Clone- Clone	h1b1	10.915	583.873	12.602	4031.512	17.66
Ecad MO NC-C	Non Clone- Clone	h1b1	10.915	538.119	12.254	3793.057	17.66
Ecad MO NC-C	Non Clone- Clone	h1b1	10.915	423.94	19.976	4008.006	17.66
Ecad MO NC-C	Non Clone- Clone	h1b1	10.915	276.956	15.776	1942.231	17.66
Ecad MO NC-C	Non Clone- Clone	h1b1	10.915	166.819	0.58	794.756	17.66
Ecad MO NC-C	Non Clone- Clone	h1b1	10.915	137.795	1.636	1224.697	17.66
Ecad MO NC-C	Non Clone- Clone	h1b1	10.915	118.884	2.485	1724.64	17.66
Ecad MO NC-C	Non Clone- Clone
Ecad MO NC-C	Non Clone- Clone	h1b2	7.997	969.198	137.206	4095	12.915
Ecad MO NC-C	Non Clone- Clone	h1b2	7.997	852.76	62.371	4095	12.915
Ecad MO NC-C	Non Clone- Clone	h1b2	7.997	685.052	34.631	4095	12.915
Ecad MO NC-C	Non Clone- Clone	h1b2	7.997	514.576	7.585	4095	12.915
Ecad MO NC-C	Non Clone- Clone	h1b2	7.997	392.533	6.849	3935.15	12.915
Ecad MO NC-C	Non Clone- Clone	h1b2	7.997	240.311	1.704	1418.672	12.915
Ecad MO NC-C	Non Clone- Clone	h1b2	7.997	145.779	1.919	1076.784	12.915
Ecad MO NC-C	Non Clone- Clone	h1b2	7.997	90.136	0	588.493	12.915
Ecad MO NC-C	Non Clone- Clone
Ecad MO NC-C	Non Clone- Clone	h1b3	7.781	527.916	24.871	3078.07	12.564
Ecad MO NC-C	Non Clone- Clone	h1b3	7.781	417.242	24.481	2870.815	12.564
Ecad MO NC-C	Non Clone- Clone	h1b3	7.781	369.584	16.387	4037.109	12.564
Ecad MO NC-C	Non Clone- Clone	h1b3	7.781	329.379	5.534	4095	12.564
Ecad MO NC-C	Non Clone- Clone
Ecad MO NC-C	Non Clone- Clone	h1b4	6.97	372.792	19.712	2596.39	11.246
Ecad MO NC-C	Non Clone- Clone	h1b4	6.97	413.392	14.441	4095	11.246
Ecad MO NC-C	Non Clone- Clone	h1b4	6.97	368.268	16.743	2550.908	11.246
Ecad MO NC-C	Non Clone- Clone	h1b4	6.97	398.438	14.451	3648.812	11.246
Ecad MO NC-C	Non Clone- Clone	h1b4	6.97	363.141	34.109	3473.002	11.246
Ecad MO NC-C	Non Clone- Clone	h1b4	6.97	267.196	29.374	871.046	11.246
Ecad MO NC-C	Non Clone- Clone	h1b4	6.97	181.903	4.308	870.447	11.246
Ecad MO NC-C	Non Clone- Clone
Ecad MO NC-C	Non Clone- Clone	h1b5	9.402	695.953	15.98	4095	15.187
Ecad MO NC-C	Non Clone- Clone	h1b5	9.402	590.832	20.526	4095	15.187
Ecad MO NC-C	Non Clone- Clone	h1b5	9.402	387.572	4.821	3736.537	15.187
Ecad MO NC-C	Non Clone- Clone	h1b5	9.402	307.961	17.199	3821.631	15.187
Ecad MO NC-C	Non Clone- Clone	h1b5	9.402	243.874	4.046	4095	15.187
Ecad MO NC-C	Non Clone- Clone
Ecad MO NC-C	Non Clone- Clone	h1b6	8.808	424.09	36.621	2222.376	14.233
Ecad MO NC-C	Non Clone- Clone	h1b6	8.808	360.647	26.331	3096.825	14.233
Ecad MO NC-C	Non Clone- Clone	h1b6	8.808	302.38	6.08	3971.623	14.233
Ecad MO NC-C	Non Clone- Clone	h1b6	8.808	225.368	0.133	2091.582	14.233
Ecad MO NC-C	Non Clone- Clone	h1b6	8.808	193.877	1.676	2511.289	14.233
Ecad MO NC-C	Non Clone- Clone	h1b6	8.808	209.808	0.729	3806.788	14.233
Ecad MO NC-C	Non Clone- Clone
Ecad MO NC-C	Non Clone- Clone	h1b7	9.618	642.881	23.252	3801.842	15.477
Ecad MO NC-C	Non Clone- Clone	h1b7	9.618	593.479	43.335	2990.033	15.477
Ecad MO NC-C	Non Clone- Clone	h1b7	9.618	496.309	56.292	1999.453	15.477
Ecad MO NC-C	Non Clone- Clone	h1b7	9.618	414.152	27.363	2909.796	15.477
Ecad MO NC-C	Non Clone- Clone	h1b7	9.618	359.728	19.024	2951.182	15.477
Ecad MO NC-C	Non Clone- Clone	h1b7	9.618	326.417	9.068	3421.536	15.477
Ecad MO NC-C	Non Clone- Clone	h1b7	9.618	298.067	9.314	2503.986	15.477
Ecad MO NC-C	Non Clone- Clone	h1b7	9.618	232.669	4.953	1741.395	15.477
Ecad MO NC-C	Non Clone- Clone	h1b7	9.618	138.933	1.073	872.686	15.477
Ecad MO NC-C	Non Clone- Clone
Ecad MO NC-C	Non Clone- Clone	h1b8	9.078	564.519	10.759	4095	14.672
Ecad MO NC-C	Non Clone- Clone	h1b8	9.078	437.613	19.838	4095	14.672
Ecad MO NC-C	Non Clone- Clone	h1b8	9.078	352.511	10.384	3477.58	14.672
Ecad MO NC-C	Non Clone- Clone	h1b8	9.078	243.616	6.314	1863.766	14.672
Ecad MO NC-C	Non Clone- Clone	h1b8	9.078	178.949	5.058	1048.269	14.672
Ecad MO NC-C	Non Clone- Clone	h1b8	9.078	163.677	2.798	2824.447	14.672
Ecad MO NC-C	Non Clone- Clone
Ecad MO NC-C	Non Clone- Clone	h1b9	10.375	942.199	147.358	4095	16.78
Ecad MO NC-C	Non Clone- Clone	h1b9	10.375	825.357	61.763	4095	16.78
Ecad MO NC-C	Non Clone- Clone	h1b9	10.375	717.522	50.204	4095	16.78
Ecad MO NC-C	Non Clone- Clone	h1b9	10.375	573.491	14.57	4093.116	16.78
Ecad MO NC-C	Non Clone- Clone	h1b9	10.375	417.911	6.563	4095	16.78
Ecad MO NC-C	Non Clone- Clone	h1b9	10.375	379.104	11.241	4095	16.78
Ecad MO NC-C	Non Clone- Clone	h1b9	10.375	305.349	3.421	4095	16.78
Ecad MO NC-C	Non Clone- Clone	h1b9	10.375	223.881	0.655	3766.077	16.78
Ecad MO NC-C	Non Clone- Clone	h1b9	10.375	127.782	0.13	1786.527	16.78
Ecad MO NC-C	Non Clone- Clone	h2b1	9.726	665.597	43.701	4095	15.689
Ecad MO NC-C	Non Clone- Clone	h2b1	9.726	537.41	69.967	2763.477	15.689
Ecad MO NC-C	Non Clone- Clone	h2b1	9.726	406.279	50.376	2810.339	15.689
Ecad MO NC-C	Non Clone- Clone	h2b1	9.726	351.407	44.336	4095	15.689
Ecad MO NC-C	Non Clone- Clone
Ecad MO NC-C	Non Clone- Clone	h2b2	9.294	941.916	69.505	4095	15.024
Ecad MO NC-C	Non Clone- Clone	h2b2	9.294	789.624	45.197	4095	15.024
Ecad MO NC-C	Non Clone- Clone	h2b2	9.294	657.025	42.936	4095	15.024
Ecad MO NC-C	Non Clone- Clone	h2b2	9.294	504.451	62.678	3559.751	15.024
Ecad MO NC-C	Non Clone- Clone	h2b2	9.294	478.502	46.776	2821.674	15.024
Ecad MO NC-C	Non Clone- Clone	h2b2	9.294	665.632	28.446	4095	15.024
Ecad MO NC-C	Non Clone- Clone
Ecad MO NC-C	Non Clone- Clone	h2b3	6.916	845.683	133.212	4095	11.158
Ecad MO NC-C	Non Clone- Clone	h2b3	6.916	630.111	97.375	3062.021	11.158
Ecad MO NC-C	Non Clone- Clone	h2b3	6.916	412.633	44.356	3229.707	11.158
Ecad MO NC-C	Non Clone- Clone	h2b3	6.916	269.842	42.637	1115.486	11.158
Ecad MO NC-C	Non Clone- Clone
Ecad MO NC-C	Non Clone- Clone	h2b4	3.404	744.315	82.456	2992.467	5.447
Ecad MO NC-C	Non Clone- Clone	h2b4	3.404	466.228	74.676	1601.944	5.447
Ecad MO NC-C	Non Clone- Clone	h2b4	3.404	293.896	51.742	736.941	5.447
Ecad MO NC-C	Non Clone- Clone	h2b4	3.404	212.352	22.184	577.288	5.447
Ecad MO NC-C	Non Clone- Clone
Ecad MO NC-C	Non Clone- Clone	h2b5	10.429	929.339	79.994	4095	16.869
Ecad MO NC-C	Non Clone- Clone	h2b5	10.429	843.538	64.178	4095	16.869
Ecad MO NC-C	Non Clone- Clone	h2b5	10.429	596.188	48.083	4095	16.869
Ecad MO NC-C	Non Clone- Clone	h2b5	10.429	438.889	38.892	4095	16.869
Ecad MO NC-C	Non Clone- Clone	h2b5	10.429	366.788	11.914	4095	16.869
Ecad MO NC-C	Non Clone- Clone	h2b5	10.429	314.137	25.15	1524.893	16.869
Ecad MO NC-C	Non Clone- Clone
Ecad MO NC-C	Non Clone- Clone	h2b6	6.862	855.21	70.888	4095	11.07
Ecad MO NC-C	Non Clone- Clone	h2b6	6.862	659.132	41.534	4095	11.07
Ecad MO NC-C	Non Clone- Clone	h2b6	6.862	428.522	24.177	3655.729	11.07
Ecad MO NC-C	Non Clone- Clone	h2b6	6.862	294.918	30.334	1250.591	11.07
Ecad MO NC-C	Non Clone- Clone	h2b6	6.862	264.121	36.64	1258.087	11.07
Ecad MO NC-C	Non Clone- Clone
Ecad MO NC-C	Non Clone- Clone	h2b7	6.268	1210.583	115.675	4095	10.104
Ecad MO NC-C	Non Clone- Clone	h2b7	6.268	1182.782	128.453	4095	10.104
Ecad MO NC-C	Non Clone- Clone	h2b7	6.268	1114.405	121.277	4095	10.104
Ecad MO NC-C	Non Clone- Clone	h2b7	6.268	745.62	89.859	4095	10.104
Ecad MO NC-C	Non Clone- Clone
Ecad MO NC-C	Non Clone- Clone	h2b8	5.674	1117.638	65.771	4095	9.137
Ecad MO NC-C	Non Clone- Clone	h2b8	5.674	1103.111	52.579	4095	9.137
Ecad MO NC-C	Non Clone- Clone	h2b8	5.674	913.919	33.221	4095	9.137
Ecad MO NC-C	Non Clone- Clone	h2b8	5.674	762.152	90.902	4095	9.137
Ecad MO NC-C	Non Clone- Clone	h2b8	5.674	679.581	105.017	4094.92	9.137
Ecad MO NC-C	Non Clone- Clone
Ecad MO NC-C	Non Clone- Clone	h2b9	7.295	883.06	174.632	4069.889	11.773
Ecad MO NC-C	Non Clone- Clone	h2b9	7.295	692.222	92.731	3250.84	11.773
Ecad MO NC-C	Non Clone- Clone	h2b9	7.295	529.863	68.033	2589.446	11.773
Ecad MO NC-C	Non Clone- Clone	h2b9	7.295	384.087	70.01	1326.174	11.773
Ecad MO NC-C	Non Clone- Clone	h2b9	7.295	279.702	9.954	1794.647	11.773
Ecad MO NC-C	Non Clone- Clone
Ecad MO NC-C	Non Clone- Clone	h2b10	6.052	1510.935	89.736	4095	9.752
Ecad MO NC-C	Non Clone- Clone	h2b10	6.052	1345.822	68.812	4095	9.752
Ecad MO NC-C	Non Clone- Clone	h2b10	6.052	858.58	90.07	4012.954	9.752
Ecad MO NC-C	Non Clone- Clone	h2b10	6.052	371.42	87.815	2050.972	9.752
Ecad MO NC-C	Non Clone- Clone
Ecad MO NC-C	Non Clone- Clone	h2b11	6.052	1345.822	68.812	4095	9.752
Ecad MO NC-C	Non Clone- Clone	h2b11	6.052	858.58	90.07	4012.954	9.752
Ecad MO NC-C	Non Clone- Clone	h2b11	6.052	371.42	87.815	2050.972	9.752
Ecad MO NC-C	Non Clone- Clone	h2b11	6.052	266.936	39.453	1299.103	9.752
Ecad MO NC-C	Non Clone- Clone
Ecad MO NC-C	Non Clone- Clone	h2b12	8.483	1506.006	126.779	4095	13.706
Ecad MO NC-C	Non Clone- Clone	h2b12	8.483	1440.306	161.882	4095	13.706
Ecad MO NC-C	Non Clone- Clone	h2b12	8.483	1113.239	106.429	4095	13.706
Ecad MO NC-C	Non Clone- Clone	h2b12	8.483	805.807	57.504	4095	13.706
Ecad MO NC-C	Non Clone- Clone	h2b12	8.483	352.098	52.952	1397.194	13.706
Ecad MO NC-C	Non Clone- Clone
Ecad MO NC-C	Non Clone- Clone	h2b13	10.969	701.164	51.246	4095	17.747
Ecad MO NC-C	Non Clone- Clone	h2b13	10.969	628.695	38.975	4093.567	17.747
Ecad MO NC-C	Non Clone- Clone	h2b13	10.969	559.071	15.832	4095	17.747
Ecad MO NC-C	Non Clone- Clone	h2b13	10.969	438.958	28.17	4095	17.747
Ecad MO NC-C	Non Clone- Clone	h2b13	10.969	362.014	22.356	4095	17.747
Ecad MO NC-C	Non Clone- Clone
Ecad MO NC-C	Non Clone- Clone	h2b14	10.104	663.091	13.883	4095	16.342
Ecad MO NC-C	Non Clone- Clone	h2b14	10.104	488.896	44.019	2970.151	16.342
Ecad MO NC-C	Non Clone- Clone	h2b14	10.104	395.252	30.407	4095	16.342
Ecad MO NC-C	Non Clone- Clone	h2b14	10.104	322.353	22.756	3203.277	16.342
Ecad MO NC-C	Non Clone- Clone	h2b14	10.104	285.888	24.147	2304.114	16.342
Ecad MO NC-C	Non Clone- Clone	h2b14	10.104	282.579	20.101	1764.896	16.342
Ecad MO NC-C	Non Clone- Clone	h3b1	10.969	815.134	30.731	4095	17.747
Ecad MO NC-C	Non Clone- Clone	h3b1	10.969	695.262	40.401	3008.771	17.747
Ecad MO NC-C	Non Clone- Clone	h3b1	10.969	460.848	50.745	2438.183	17.747
Ecad MO NC-C	Non Clone- Clone	h3b1	10.969	426.628	17.075	3842.886	17.747
Ecad MO NC-C	Non Clone- Clone	h3b1	10.969	340.842	11.408	4095	17.747
Ecad MO NC-C	Non Clone- Clone
Ecad MO NC-C	Non Clone- Clone	h3b2	9.888	704.241	110.227	3695.485	15.99
Ecad MO NC-C	Non Clone- Clone	h3b2	9.888	793.937	93.791	3678.461	15.99
Ecad MO NC-C	Non Clone- Clone	h3b2	9.888	902.29	97.228	4095	15.99
Ecad MO NC-C	Non Clone- Clone	h3b2	9.888	972.801	35.001	4095	15.99
Ecad MO NC-C	Non Clone- Clone	h3b2	9.888	606.851	31.515	4095	15.99
Ecad MO NC-C	Non Clone- Clone	h3b2	9.888	368.553	25.899	1391.878	15.99
Ecad MO NC-C	Non Clone- Clone	h3b2	9.888	312.522	2.708	1811.145	15.99
Ecad MO NC-C	Non Clone- Clone
Ecad MO NC-C	Non Clone- Clone	h3b3	9.564	1330.171	134.72	4095	15.463
Ecad MO NC-C	Non Clone- Clone	h3b3	9.564	1102.436	40.207	4095	15.463
Ecad MO NC-C	Non Clone- Clone	h3b3	9.564	736.452	51.732	3561.844	15.463
Ecad MO NC-C	Non Clone- Clone	h3b3	9.564	512.938	40.701	2376.567	15.463
Ecad MO NC-C	Non Clone- Clone	h3b3	9.564	261.105	30.276	1292.812	15.463
Ecad MO NC-C	Non Clone- Clone	h3b3	9.564	174.532	6.846	3626.049	15.463
Ecad MO NC-C	Non Clone- Clone
Ecad MO NC-C	Non Clone- Clone	h3b4	6.646	1516.061	233.883	4095	10.719
Ecad MO NC-C	Non Clone- Clone	h3b4	6.646	1419.396	192.813	4095	10.719
Ecad MO NC-C	Non Clone- Clone	h3b4	6.646	1212.705	195.312	4095	10.719
Ecad MO NC-C	Non Clone- Clone	h3b4	6.646	579.767	94.681	2375.344	10.719
Ecad MO NC-C	Non Clone- Clone	h3b4	6.646	329.468	39.913	1121.946	10.719
Ecad MO NC-C	Non Clone- Clone	h3b4	6.646	206.466	22.339	913.894	10.719
Ecad MO NC-C	Non Clone- Clone
Ecad MO NC-C	Non Clone- Clone	h3b5	7.457	1181.928	121.439	4095	12.037
Ecad MO NC-C	Non Clone- Clone	h3b5	7.457	751.522	83.396	4094.805	12.037
Ecad MO NC-C	Non Clone- Clone	h3b5	7.457	509.962	54.047	2894.175	12.037
Ecad MO NC-C	Non Clone- Clone	h3b5	7.457	253.266	19.901	1735.084	12.037
Ecad MO NC-C	Non Clone- Clone	h3b5	7.457	182.195	2.305	1893.777	12.037
Ecad MO NC-C	Non Clone- Clone
Ecad MO NC-C	Non Clone- Clone	h3b6	5.133	1145.55	154.226	4089.384	8.259
Ecad MO NC-C	Non Clone- Clone	h3b6	5.133	919.611	176.131	3464.367	8.259
Ecad MO NC-C	Non Clone- Clone	h3b6	5.133	594.655	88.483	2016.972	8.259
Ecad MO NC-C	Non Clone- Clone	h3b6	5.133	347.597	17.083	1737.622	8.259
Ecad MO NC-C	Non Clone- Clone	h3b6	5.133	232.609	19.627	881.174	8.259
Ecad MO NC-C	Non Clone- Clone
Ecad MO NC-C	Non Clone- Clone	h3b7	6.376	882.711	115.374	4058.555	10.279
Ecad MO NC-C	Non Clone- Clone	h3b7	6.376	1056.431	40.556	4091.009	10.279
Ecad MO NC-C	Non Clone- Clone	h3b7	6.376	1176.694	33.981	4095	10.279
Ecad MO NC-C	Non Clone- Clone	h3b7	6.376	1087.497	18.942	4095	10.279
Ecad MO NC-C	Non Clone- Clone	h3b7	6.376	911.237	29.537	4095	10.279
Ecad MO NC-C	Non Clone- Clone	h3b7	6.376	682.241	24.848	4095	10.279
Ecad MO NC-C	Non Clone- Clone	h3b7	6.376	470.69	30.386	3791.546	10.279
Ecad MO NC-C	Non Clone- Clone
Ecad MO NC-C	Non Clone- Clone	h3b8	9.132	1396.44	240.942	4095	14.76
Ecad MO NC-C	Non Clone- Clone	h3b8	9.132	1567.113	282.488	4095	14.76
Ecad MO NC-C	Non Clone- Clone	h3b8	9.132	1461.818	175.828	4095	14.76
Ecad MO NC-C	Non Clone- Clone	h3b8	9.132	1141.459	107.504	4095	14.76
Ecad MO NC-C	Non Clone- Clone	h3b8	8.916	1290.405	175.551	4095	14.409
Ecad MO NC-C	Non Clone- Clone	h3b8	8.916	1107.626	162.744	4084.806	14.409
Ecad MO NC-C	Non Clone- Clone	h3b8	8.916	873.361	194.228	4095	14.409
Ecad MO NC-C	Non Clone- Clone
Ecad MO NC-C	Non Clone- Clone	h3b9	4.755	2217.64	559.958	4095	7.644
Ecad MO NC-C	Non Clone- Clone	h3b9	4.755	2085.01	531.579	4095	7.644
Ecad MO NC-C	Non Clone- Clone	h3b9	4.755	1683.904	459.804	4095	7.644
Ecad MO NC-C	Non Clone- Clone	h3b9	4.755	988.173	262.726	2955.285	7.644
Ecad MO NC-C	Non Clone- Clone	h3b9	4.755	778.478	213.06	2988.978	7.644
Ecad MO NC-C	Non Clone- Clone	h3b9	4.755	487.742	92.216	2627.489	7.644
Ecad MO NC-C	Non Clone- Clone
Ecad MO NC-C	Non Clone- Clone	h3b10	4.431	1634.383	165.626	4095	7.117
Ecad MO NC-C	Non Clone- Clone	h3b10	4.431	1390.676	156.577	4079.768	7.117
Ecad MO NC-C	Non Clone- Clone	h3b10	4.431	1141.424	106.614	3915.643	7.117
Ecad MO NC-C	Non Clone- Clone	h3b10	4.431	874.616	161.787	3920.472	7.117
Ecad MO NC-C	Non Clone- Clone	h3b10	4.431	726.818	95.088	3481.45	7.117
Ecad MO NC-C	Non Clone- Clone	h3b10	4.431	284.649	66.828	691.339	7.117
Ecad MO NC-C	Non Clone- Clone
Ecad MO NC-C	Non Clone- Clone	h3b11	9.348	1267.658	82.289	4095	15.112
Ecad MO NC-C	Non Clone- Clone	h3b11	9.348	1449.977	200.898	4095	15.112
Ecad MO NC-C	Non Clone- Clone	h3b11	9.348	1367.541	143.679	4095	15.112
Ecad MO NC-C	Non Clone- Clone	h3b11	9.348	1169.292	172.78	4090.479	15.112
Ecad MO NC-C	Non Clone- Clone	h3b11	9.348	1084.63	168.703	4095	15.112
Ecad MO NC-C	Non Clone- Clone	h3b11	9.348	798.304	66.146	4095	15.112
Ecad MO NC-C	Non Clone- Clone	h3b11	9.348	572.903	74.654	3430.886	15.112
Ecad MO NC-C	Non Clone- Clone
Ecad MO NC-C	Non Clone- Clone	h3b12	8.051	1506.617	331.724	3994.554	13.003
Ecad MO NC-C	Non Clone- Clone	h3b12	8.051	1787.604	360.532	4095	13.003
Ecad MO NC-C	Non Clone- Clone	h3b12	8.051	1965.766	224.699	4095	13.003
Ecad MO NC-C	Non Clone- Clone	h3b12	8.051	1420.981	256.919	4095	13.003
Ecad MO NC-C	Non Clone- Clone	h3b12	8.051	897.295	111.661	4043.642	13.003
Ecad MO NC-C	Non Clone- Clone	h3b12	8.051	746.326	88.273	4053.878	13.003
Ecad MO NC-C	Non Clone- Clone
Ecad MO NC-C	Non Clone- Clone	h3b13	7.889	792.403	131.757	4095	12.74
Ecad MO NC-C	Non Clone- Clone	h3b13	7.889	1006.392	97.436	4057.796	12.74
Ecad MO NC-C	Non Clone- Clone	h3b13	7.889	1348.319	118.936	4095	12.74
Ecad MO NC-C	Non Clone- Clone	h3b13	7.889	1248.211	128.696	4095	12.74
Ecad MO NC-C	Non Clone- Clone	h3b13	7.889	724.636	40.346	4095	12.74
Ecad MO NC-C	Non Clone- Clone	h3b13	7.889	605.516	36.394	4095	12.74
Ecad MO NC-C	Non Clone- Clone	h3b13	7.889	498.193	24.097	2890.123	12.74
Ecad MO NC-C	Non Clone- Clone
Ecad MO NC-C	Non Clone- Clone	h3b14	11.023	1591.694	248.499	4095	17.835
Ecad MO NC-C	Non Clone- Clone	h3b14	11.023	1658.639	276.189	4095	17.835
Ecad MO NC-C	Non Clone- Clone	h3b14	11.023	1663.276	341.059	4095	17.835
Ecad MO NC-C	Non Clone- Clone	h3b14	11.023	1486.379	81.945	4095	17.835
Ecad MO NC-C	Non Clone- Clone	h3b14	11.023	977.955	78.99	4095	17.835
Ecad MO NC-C	Non Clone- Clone	h3b14	11.023	671.374	27.262	3981.294	17.835
Ecad MO NC-C	Non Clone- Clone	h3b14	11.023	499.754	31.437	3269.85	17.835
Ecad MO NC-C	Non Clone- Clone
Ecad MO NC-C	Non Clone- Clone	h3b15	8.537	1096.388	157.407	4095	13.794
Ecad MO NC-C	Non Clone- Clone	h3b15	8.537	996.17	89.46	4019.038	13.794
Ecad MO NC-C	Non Clone- Clone	h3b15	8.537	838.301	152.466	4095	13.794
Ecad MO NC-C	Non Clone- Clone	h3b15	8.537	887.405	56.708	4095	13.794
Ecad MO NC-C	Non Clone- Clone	h3b15	8.537	749.772	28.852	4095	13.794
Ecad MO NC-C	Non Clone- Clone	h3b15	8.537	551.185	9.901	3873.085	13.794
Ecad MO NC-C	Non Clone- Clone
Ecad MO NC-C	Non Clone- Clone	h3b16	9.24	1423.328	337.15	4095	14.936
Ecad MO NC-C	Non Clone- Clone	h3b16	9.24	1331.608	321.312	4095	14.936
Ecad MO NC-C	Non Clone- Clone	h3b16	9.24	891.005	176.065	4095	14.936
Ecad MO NC-C	Non Clone- Clone	h3b16	9.24	760.641	118.263	4095	14.936
Ecad MO NC-C	Non Clone- Clone	h3b16	9.24	771.855	97.829	4095	14.936
Ecad MO NC-C	Non Clone- Clone	h3b16	9.24	796.653	47.369	4095	14.936
Ecad MO NC-C	Non Clone- Clone	h3b16	9.24	401.053	50.458	1753.326	14.936
Ecad MO NC-C	Non Clone- Clone	h3b16	9.24	271.474	10.205	4069.132	14.936
Ecad MO NC-C	Non Clone- Clone
Ecad MO NC-C	Non Clone- Clone	h3b17	8.267	1313.977	194.142	4095	13.353
Ecad MO NC-C	Non Clone- Clone	h3b17	8.267	1145.85	193.637	3742.599	13.353
Ecad MO NC-C	Non Clone- Clone	h3b17	8.267	921.699	110.005	4095	13.353
Ecad MO NC-C	Non Clone- Clone	h3b17	8.267	780.407	115.192	4030.942	13.353
Ecad MO NC-C	Non Clone- Clone	h3b17	4.431	1488.693	243.874	4095	7.117
Ecad MO NC-C	Non Clone- Clone	h3b17	4.431	1111.802	246.27	3415.927	7.117
Ecad MO NC-C	Non Clone- Clone	h3b17	4.431	1139.328	231.906	3684.156	7.117
Ecad MO NC-C	Non Clone- Clone	h3b17	4.431	1072.872	173.859	4095	7.117
Ecad MO NC-C	Non Clone- Clone	h3b17	4.431	675.758	207.936	3742.384	7.117
Ecad MO NC-C	Non Clone- Clone
Ecad MO NC-C	Non Clone- Clone	h3b18	6.538	1485.383	226.022	4095	10.543
Ecad MO NC-C	Non Clone- Clone	h3b18	6.538	1427.831	201.282	4095	10.543
Ecad MO NC-C	Non Clone- Clone	h3b18	6.538	1073.6	271.305	4095	10.543
Ecad MO NC-C	Non Clone- Clone	h3b18	6.538	901.191	205.931	4075.238	10.543
Ecad MO NC-C	Non Clone- Clone	h3b18	6.538	813.612	128.408	3962.466	10.543
Ecad MO NC-C	Non Clone- Clone	h3b18	6.538	727.317	82.166	4018.005	10.543
Ecad MO NC-C	Non Clone- Clone	h3b18	6.538	581.51	58.612	3049.53	10.543
Ecad MO NC-C	Non Clone- Clone	h3b18	6.538	569.286	50.101	4095	10.543
Ecad MO NC-C	Non Clone- Clone
Ecad MO NC-C	Non Clone- Clone	h3b19	13.292	1211.477	131.636	4095	21.525
Ecad MO NC-C	Non Clone- Clone	h3b19	13.292	1231.84	190.927	4095	21.525
Ecad MO NC-C	Non Clone- Clone	h3b19	13.292	1153.504	168.714	4095	21.525
Ecad MO NC-C	Non Clone- Clone	h3b19	13.292	987.107	86.316	3866.923	21.525
Ecad MO NC-C	Non Clone- Clone	h3b19	13.292	683.535	36.633	3995.629	21.525
Ecad MO NC-C	Non Clone- Clone
Ecad MO NC-C	Non Clone- Clone	h3b20	6.43	1625.068	304.714	4095	10.367
Ecad MO NC-C	Non Clone- Clone	h3b20	6.43	1676.808	311.426	4095	10.367
Ecad MO NC-C	Non Clone- Clone	h3b20	6.43	1055.595	153.416	3620.071	10.367
Ecad MO NC-C	Non Clone- Clone	h3b20	6.43	427.841	48.639	1450.185	10.367
Ecad MO NC-C	Non Clone- Clone	h3b20	6.43	259.764	41.487	714.187	10.367
Ecad MO NC-C	Non Clone- Clone
Ecad MO NC-C	Non Clone- Clone	h3b21	14.643	1041.526	76.022	4095	23.721
Ecad MO NC-C	Non Clone- Clone	h3b21	14.643	969.065	42.975	4085.224	23.721
Ecad MO NC-C	Non Clone- Clone	h3b21	14.643	798.856	46.504	3703.673	23.721
Ecad MO NC-C	Non Clone- Clone	h3b21	14.643	720.317	42.568	4095	23.721
Ecad MO NC-C	Non Clone- Clone	h3b21	14.643	656.063	19.574	4063.549	23.721
Ecad MO NC-C	Non Clone- Clone
Ecad MO NC-C	Non Clone- Clone	h3b22	5.836	711.495	123.289	4044.174	9.4
Ecad MO NC-C	Non Clone- Clone	h3b22	5.836	701.091	104.197	2703.8	9.4
Ecad MO NC-C	Non Clone- Clone	h3b22	5.836	776.277	87.473	4070.688	9.4
Ecad MO NC-C	Non Clone- Clone	h3b22	5.836	750.897	95.847	4087.985	9.4
Ecad MO NC-C	Non Clone- Clone	h3b22	5.836	511.301	68.822	2610.466	9.4
Ecad MO NC-C	Non Clone- Clone	h3b22	5.836	326.794	21.756	1570.769	9.4
Ecad MO NC-C	Non Clone- Clone	h4b1	9.456	1146.999	99.346	4095	15.287
Ecad MO NC-C	Non Clone- Clone	h4b1	9.456	1312.886	146.8	4095	15.287
Ecad MO NC-C	Non Clone- Clone	h4b1	9.456	953.851	111.539	4095	15.287
Ecad MO NC-C	Non Clone- Clone	h4b1	9.456	639.596	69.955	4095	15.287
Ecad MO NC-C	Non Clone- Clone	h4b1	9.456	409.645	46.298	4006.334	15.287
Ecad MO NC-C	Non Clone- Clone	h4b1	9.456	240.24	36.612	1345.986	15.287
Ecad MO NC-C	Non Clone- Clone
Ecad MO NC-C	Non Clone- Clone	h4b2	14.805	888.536	97.621	4095	23.985
Ecad MO NC-C	Non Clone- Clone	h4b2	14.805	1087.235	94.209	4095	23.985
Ecad MO NC-C	Non Clone- Clone	h4b2	14.805	944.814	70.41	4095	23.985
Ecad MO NC-C	Non Clone- Clone	h4b2	14.805	809.417	39.939	4095	23.985
Ecad MO NC-C	Non Clone- Clone	h4b2	14.805	617.193	21.008	4095	23.985
Ecad MO NC-C	Non Clone- Clone	h4b2	14.805	377.826	16.026	4006.975	23.985
Ecad MO NC-C	Non Clone- Clone	h4b2	14.805	250.087	3.166	1698.368	23.985
Ecad MO NC-C	Non Clone- Clone
Ecad MO NC-C	Non Clone- Clone	h4b3	7.457	1397.71	93.853	4095	12.037
Ecad MO NC-C	Non Clone- Clone	h4b3	7.457	1448.321	123.946	4095	12.037
Ecad MO NC-C	Non Clone- Clone	h4b3	7.457	1212.52	128.171	3854.342	12.037
Ecad MO NC-C	Non Clone- Clone	h4b3	7.457	815.492	25.954	2098.781	12.037
Ecad MO NC-C	Non Clone- Clone	h4b3	7.457	575.563	40.994	2901.083	12.037
Ecad MO NC-C	Non Clone- Clone
Ecad MO NC-C	Non Clone- Clone	h4b4	4.161	707.415	34.575	4095	6.677
Ecad MO NC-C	Non Clone- Clone	h4b4	4.161	927.707	33.49	4095	6.677
Ecad MO NC-C	Non Clone- Clone	h4b4	4.161	744.746	56.538	4095	6.677
Ecad MO NC-C	Non Clone- Clone	h4b4	4.161	576.262	45.744	4095	6.677
Ecad MO NC-C	Non Clone- Clone	h4b4	4.161	567.321	31.472	4095	6.677
Ecad MO NC-C	Non Clone- Clone
Ecad MO NC-C	Non Clone- Clone	h4b5	9.888	1300.198	63.809	4095	15.99
Ecad MO NC-C	Non Clone- Clone	h4b5	9.888	1328.351	63.849	4095	15.99
Ecad MO NC-C	Non Clone- Clone	h4b5	9.888	739.477	65.684	4095	15.99
Ecad MO NC-C	Non Clone- Clone	h4b5	9.888	466.978	61.416	2167.071	15.99
Ecad MO NC-C	Non Clone- Clone	h4b5	9.888	365.347	30.256	2322.515	15.99
Ecad MO NC-C	Non Clone- Clone
Ecad MO NC-C	Non Clone- Clone	h4b6	8.7	726.763	55.723	4095	14.056
Ecad MO NC-C	Non Clone- Clone	h4b6	8.7	621.655	43.814	3020.132	14.056
Ecad MO NC-C	Non Clone- Clone	h4b6	8.7	419.876	27.706	4009.745	14.056
Ecad MO NC-C	Non Clone- Clone	h4b6	8.7	303.123	3.845	3957.717	14.056
Ecad MO NC-C	Non Clone- Clone
Ecad MO NC-C	Non Clone- Clone	h4b7	6.592	1311.842	10.872	4095	10.631
Ecad MO NC-C	Non Clone- Clone	h4b7	6.592	806.003	34.743	3581.195	10.631
Ecad MO NC-C	Non Clone- Clone	h4b7	6.592	311.853	37.632	2263.109	10.631
Ecad MO NC-C	Non Clone- Clone	h4b7	6.592	208.65	17.708	1901.31	10.631
Ecad MO NC-C	Non Clone- Clone	h4b7	6.592	159.253	16.365	1380.606	10.631
Ecad MO NC-C	Non Clone- Clone
Ecad MO NC-C	Non Clone- Clone	h4b8	13.725	1278.252	80.036	4095	22.228
Ecad MO NC-C	Non Clone- Clone	h4b8	13.725	730.985	48.648	3693.031	22.228
Ecad MO NC-C	Non Clone- Clone	h4b8	13.725	446.383	16.654	2302.338	22.228
Ecad MO NC-C	Non Clone- Clone	h4b8	13.725	337.001	15.922	2419.392	22.228
Ecad MO NC-C	Non Clone- Clone	h4b8	13.725	276.071	1.776	2974.731	22.228
Ecad MO NC-C	Non Clone- Clone
Ecad MO NC-C	Non Clone- Clone	h4b9	4.593	1130.15	161.054	4095	7.38
Ecad MO NC-C	Non Clone- Clone	h4b9	4.593	1499.716	292.561	4095	7.38
Ecad MO NC-C	Non Clone- Clone	h4b9	4.593	1319.733	126.144	4095	7.38
Ecad MO NC-C	Non Clone- Clone	h4b9	4.593	878.736	148.332	3721.356	7.38
Ecad MO NC-C	Non Clone- Clone	h4b9	4.593	652.434	121.306	1490.645	7.38
Ecad MO NC-C	Non Clone- Clone	h4b9	4.593	547.175	122.898	1669.711	7.38
Ecad MO NC-C	Non Clone- Clone
Ecad MO NC-C	Non Clone- Clone	h4b10	15.13	1108.04	122.414	4094.59	24.512
Ecad MO NC-C	Non Clone- Clone	h4b10	15.13	1208.613	122.644	4095	24.512
Ecad MO NC-C	Non Clone- Clone	h4b10	15.13	1074.003	127.21	4095	24.512
Ecad MO NC-C	Non Clone- Clone	h4b10	15.13	833.359	57.136	4095	24.512
Ecad MO NC-C	Non Clone- Clone	h4b10	15.13	658.317	64.42	4095	24.512
Ecad MO NC-C	Non Clone- Clone	h4b10	15.13	490.196	55.136	3338.483	24.512
Ecad MO NC-C	Non Clone- Clone	h4b10	15.13	367.119	15.544	2581.794	24.512
Ecad MO NC-C	Non Clone- Clone	h4b10	15.13	237.02	10.856	2043.559	24.512
Ecad MO NC-C	Non Clone- Clone
Ecad MO NC-C	Non Clone- Clone	h4b11	16.264	905.392	50.086	4095	26.357
Ecad MO NC-C	Non Clone- Clone	h4b11	16.264	1041.479	64.357	4095	26.357
Ecad MO NC-C	Non Clone- Clone	h4b11	16.264	944.906	39.254	4088.29	26.357
Ecad MO NC-C	Non Clone- Clone	h4b11	16.264	660.679	37.155	4083.248	26.357
Ecad MO NC-C	Non Clone- Clone	h4b11	16.264	517.151	20.468	4093.235	26.357
Ecad MO NC-C	Non Clone- Clone	h4b11	16.264	402.84	19.035	3898.092	26.357
Ecad MO NC-C	Non Clone- Clone
Ecad MO NC-C	Non Clone- Clone	h4b12	5.62	803.536	45.23	4095	9.049
Ecad MO NC-C	Non Clone- Clone	h4b12	5.62	609.872	37.636	3879.717	9.049
Ecad MO NC-C	Non Clone- Clone	h4b12	5.62	412.797	28.326	2106.105	9.049
Ecad MO NC-C	Non Clone- Clone	h4b12	5.62	240.403	16.213	3766.944	9.049
Ecad MO NC-C	Non Clone- Clone	h4b12	5.62	152.969	13.13	2110.365	9.049
Ecad MO NC-C	Non Clone- Clone
Ecad MO NC-C	Non Clone- Clone	h4b13	5.295	864.306	38.017	4095	8.522
Ecad MO NC-C	Non Clone- Clone	h4b13	5.295	833.378	37.947	4071.136	8.522
Ecad MO NC-C	Non Clone- Clone	h4b13	5.295	681.662	39.989	3064.285	8.522
Ecad MO NC-C	Non Clone- Clone	h4b13	5.295	474.388	35.103	4085.335	8.522
Ecad MO NC-C	Non Clone- Clone	h4b13	5.295	349.185	25.388	2798.309	8.522
Ecad MO NC-C	Non Clone- Clone
Ecad MO NC-C	Non Clone- Clone	h4b14	9.294	1079.073	80.722	4085.093	15.024
Ecad MO NC-C	Non Clone- Clone	h4b14	9.294	1277.807	108.864	4095	15.024
Ecad MO NC-C	Non Clone- Clone	h4b14	9.294	903.099	191.818	4095	15.024
Ecad MO NC-C	Non Clone- Clone	h4b14	9.294	736.824	131.452	3856.875	15.024
Ecad MO NC-C	Non Clone- Clone	h4b14	9.294	689.179	84.678	3928.665	15.024
Ecad MO NC-C	Non Clone- Clone	h4b14	9.294	626.929	18.009	4095	15.024
Ecad MO NC-C	Non Clone- Clone
Ecad MO NC-C	Non Clone- Clone	h4b15	9.186	1458.034	114.468	4095	14.848
Ecad MO NC-C	Non Clone- Clone	h4b15	9.186	1554.79	170.357	4095	14.848
Ecad MO NC-C	Non Clone- Clone	h4b15	9.186	1178.473	140.392	3942.968	14.848
Ecad MO NC-C	Non Clone- Clone	h4b15	9.186	541.181	35.511	2527.594	14.848
Ecad MO NC-C	Non Clone- Clone	h4b15	9.186	430.387	18.412	3972.49	14.848
Ecad MO NC-C	Non Clone- Clone	h4b15	9.186	408.952	1.842	3901.2	14.848
Ecad MO NC-C	Non Clone- Clone
Ecad MO NC-C	Non Clone- Clone	h4b16	10.321	1575.722	144.455	4095	16.693
Ecad MO NC-C	Non Clone- Clone	h4b16	10.321	1825.197	243.254	4095	16.693
Ecad MO NC-C	Non Clone- Clone	h4b16	10.321	1938.472	202.641	4095	16.693
Ecad MO NC-C	Non Clone- Clone	h4b16	10.321	1775.131	175.832	4095	16.693
Ecad MO NC-C	Non Clone- Clone	h4b16	10.321	1295.276	219.297	4095	16.693
Ecad MO NC-C	Non Clone- Clone	h4b16	10.321	877.753	155.504	4095	16.693
Ecad MO NC-C	Non Clone- Clone	h4b16	10.321	715.639	44.478	4095	16.693
Ecad MO NC-C	Non Clone- Clone	h5b1	7.295	962.172	1.3	4095	11.773
Ecad MO NC-C	Non Clone- Clone	h5b1	7.295	781.404	8.036	4095	11.773
Ecad MO NC-C	Non Clone- Clone	h5b1	7.295	665.006	9.325	4095	11.773
Ecad MO NC-C	Non Clone- Clone	h5b1	7.295	566.87	9.674	4095	11.773
Ecad MO NC-C	Non Clone- Clone	h5b1	7.295	436.262	4.028	4095	11.773
Ecad MO NC-C	Non Clone- Clone	h5b1	7.295	361.044	1.869	4095	11.773
Ecad MO NC-C	Non Clone- Clone	h5b1	7.295	217.138	0.014	2227.722	11.773
Ecad MO NC-C	Non Clone- Clone	h5b1	7.295	111.066	0	714.945	11.773
Ecad MO NC-C	Non Clone- Clone
Ecad MO NC-C	Non Clone- Clone	h5b2	7.295	683.491	56.855	4095	11.773
Ecad MO NC-C	Non Clone- Clone	h5b2	7.295	599.877	53.812	4095	11.773
Ecad MO NC-C	Non Clone- Clone	h5b2	7.295	426.3	76.685	2505.577	11.773
Ecad MO NC-C	Non Clone- Clone	h5b2	7.295	334.313	45.576	1235.565	11.773
Ecad MO NC-C	Non Clone- Clone	h5b2	7.295	245.872	21.247	1113.088	11.773
Ecad MO NC-C	Non Clone- Clone	h5b2	7.295	214.125	5.739	1637.532	11.773
Ecad MO NC-C	Non Clone- Clone	h5b2	7.295	167.839	1.911	1364.707	11.773
Ecad MO NC-C	Non Clone- Clone
Ecad MO NC-C	Non Clone- Clone	h5b3	6.862	381.31	5.594	2290.712	11.07
Ecad MO NC-C	Non Clone- Clone	h5b3	6.862	333.539	4.476	1946.031	11.07
Ecad MO NC-C	Non Clone- Clone	h5b3	6.862	254.099	4.325	1306.951	11.07
Ecad MO NC-C	Non Clone- Clone	h5b3	6.862	162.935	3.33	899.225	11.07
Ecad MO NC-C	Non Clone- Clone	h5b3	6.862	126.67	2.104	1360.758	11.07
Ecad MO NC-C	Non Clone- Clone	h5b3	6.862	132.555	0.202	3049.203	11.07
Ecad MO NC-C	Non Clone- Clone
Ecad MO NC-C	Non Clone- Clone	h5b4	7.673	334.952	6.187	4091.185	12.388
Ecad MO NC-C	Non Clone- Clone	h5b4	7.673	316.562	3.167	3514.794	12.388
Ecad MO NC-C	Non Clone- Clone	h5b4	7.673	250.047	2.821	2887.992	12.388
Ecad MO NC-C	Non Clone- Clone	h5b4	7.673	167.006	3.873	1224.4	12.388
Ecad MO NC-C	Non Clone- Clone	h5b4	7.673	100.715	1.383	1083.468	12.388
Ecad MO NC-C	Non Clone- Clone	h5b4	7.673	68.393	0.071	507.204	12.388
Ecad MO NC-C	Non Clone- Clone
Ecad MO NC-C	Non Clone- Clone	h5b5	6.916	530.9	43.593	2877.52	11.158
Ecad MO NC-C	Non Clone- Clone	h5b5	6.916	422.125	53.679	2326.499	11.158
Ecad MO NC-C	Non Clone- Clone	h5b5	6.916	314.71	31.88	1764.785	11.158
Ecad MO NC-C	Non Clone- Clone	h5b5	6.916	209.428	13.359	806.192	11.158
Ecad MO NC-C	Non Clone- Clone	h5b5	6.916	118.558	2.128	724.068	11.158
Ecad MO NC-C	Non Clone- Clone	h5b5	6.916	63.999	1.3	461.69	11.158
Ecad MO NC-C	Non Clone- Clone
Ecad MO NC-C	Non Clone- Clone	h5b6	7.187	633.206	66.264	3787.255	11.597
Ecad MO NC-C	Non Clone- Clone	h5b6	7.187	633.206	66.264	3787.255	11.597
Ecad MO NC-C	Non Clone- Clone	h5b6	7.187	446.171	59.699	2550.113	11.597
Ecad MO NC-C	Non Clone- Clone	h5b6	7.187	309.664	22.971	1795.971	11.597
Ecad MO NC-C	Non Clone- Clone	h5b6	7.187	200.75	23.512	920.313	11.597
Ecad MO NC-C	Non Clone- Clone	h5b6	7.187	168.784	1.692	1998.923	11.597
Ecad MO NC-C	Non Clone- Clone	h5b6	7.187	202.955	0.162	4095	11.597
Ecad MO NC-C	Non Clone- Clone
Ecad MO NC-C	Non Clone- Clone	h5b7	9.564	1316.681	108.008	4095	15.463
Ecad MO NC-C	Non Clone- Clone	h5b7	9.564	1081.074	131.224	4095	15.463
Ecad MO NC-C	Non Clone- Clone	h5b7	9.564	758.12	101.321	4095	15.463
Ecad MO NC-C	Non Clone- Clone	h5b7	9.564	564.23	29.354	4095	15.463
[truncated: 485 more rows]
