# Supplementary material for: Stepwise polarisation of developing bilayered epidermis is mediated by aPKC and E-cadherin in zebrafish
Source: eLife. 2020 Jan 22;9:e49064. doi: 10.7554/eLife.49064 (PMC6975926; doi:10.7554/eLife.49064)
Supplement: Figure 5—source data 1. [file elife-49064-fig5-data1.csv]

Genotype	Boundary	Cell name	Area	Mean	Min	Max	Length
Ctrl MO C-C	Clone- Clone	h1b1	12.644	250.004	21.305	697.431	20.471
Ctrl MO C-C	Clone- Clone	h1b1	12.644	342.333	25.502	1022.048	20.471
Ctrl MO C-C	Clone- Clone	h1b1	12.644	411.885	24.201	1404.68	20.471
Ctrl MO C-C	Clone- Clone	h1b1	12.644	411.875	49.819	1359.196	20.471
Ctrl MO C-C	Clone- Clone	h1b1	12.644	358.651	27.969	1513.672	20.471
Ctrl MO C-C	Clone- Clone	h1b1	12.644	351.636	52.872	1711.126	20.471
Ctrl MO C-C	Clone- Clone	h1b1	12.644	337.245	61.243	1636.598	20.471
Ctrl MO C-C	Clone- Clone	h1b1	12.644	348.288	30.223	1382.902	20.471
Ctrl MO C-C	Clone- Clone	h1b1	12.644	429.567	68.717	1640.577	20.471
Ctrl MO C-C	Clone- Clone	h1b1	12.644	439.248	44.915	2418.031	20.471
Ctrl MO C-C	Clone- Clone
Ctrl MO C-C	Clone- Clone	h1b2	10.266	322.935	2.291	960.466	16.605
Ctrl MO C-C	Clone- Clone	h1b2	10.266	432.889	39.919	1612.921	16.605
Ctrl MO C-C	Clone- Clone	h1b2	10.266	592.518	31.855	3092.817	16.605
Ctrl MO C-C	Clone- Clone	h1b2	10.266	807.287	114.259	3922.371	16.605
Ctrl MO C-C	Clone- Clone	h1b2	10.266	1162.655	194.15	3439.175	16.605
Ctrl MO C-C	Clone- Clone	h1b2	10.266	1064.516	151.428	3088.616	16.605
Ctrl MO C-C	Clone- Clone	h1b2	10.266	858.78	185.357	2327.255	16.605
Ctrl MO C-C	Clone- Clone	h1b2	10.266	654.26	173.594	2366.74	16.605
Ctrl MO C-C	Clone- Clone	h1b2	10.266	394.025	45.475	2763.762	16.605
Ctrl MO C-C	Clone- Clone
Ctrl MO C-C	Clone- Clone	h1b3	5.403	253.65	30.62	855.699	8.697
Ctrl MO C-C	Clone- Clone	h1b3	5.403	342.196	51.444	951.116	8.697
Ctrl MO C-C	Clone- Clone	h1b3	5.403	473.706	47.449	1182.499	8.697
Ctrl MO C-C	Clone- Clone	h1b3	5.403	595.564	64.259	1657.1	8.697
Ctrl MO C-C	Clone- Clone	h1b3	5.403	594.319	110.458	2116.799	8.697
Ctrl MO C-C	Clone- Clone	h1b3	5.403	559.616	93.714	2418.958	8.697
Ctrl MO C-C	Clone- Clone	h1b3	5.403	544.708	98.156	2262.204	8.697
Ctrl MO C-C	Clone- Clone	h1b3	5.403	529.05	115.813	1744.905	8.697
Ctrl MO C-C	Clone- Clone	h1b3	5.403	434.661	94.934	1850.874	8.697
Ctrl MO C-C	Clone- Clone
Ctrl MO C-C	Clone- Clone	h1b4	12.05	342.152	3.893	1246.457	19.505
Ctrl MO C-C	Clone- Clone	h1b4	12.05	457.009	11.218	2060.268	19.505
Ctrl MO C-C	Clone- Clone	h1b4	12.05	597.465	23.395	2162.906	19.505
Ctrl MO C-C	Clone- Clone	h1b4	12.05	706.38	61.987	2581.833	19.505
Ctrl MO C-C	Clone- Clone	h1b4	12.266	1097.266	137.891	3174.016	19.851
Ctrl MO C-C	Clone- Clone	h1b4	12.266	992.172	147.134	2779.414	19.851
Ctrl MO C-C	Clone- Clone	h1b4	12.266	847.365	175.85	3040.951	19.851
Ctrl MO C-C	Clone- Clone	h1b4	12.266	728.745	134.056	3744.085	19.851
Ctrl MO C-C	Clone- Clone	h1b4	12.266	537.253	91.841	2847.544	19.851
Ctrl MO C-C	Clone- Clone
Ctrl MO C-C	Clone- Clone	h1b5	7.943	467.498	76.396	1660.571	12.811
Ctrl MO C-C	Clone- Clone	h1b5	7.943	510.107	96.193	1880.393	12.811
Ctrl MO C-C	Clone- Clone	h1b5	7.943	563.157	118.437	2171.812	12.811
Ctrl MO C-C	Clone- Clone	h1b5	9.078	1016.64	111.616	4067.224	14.672
Ctrl MO C-C	Clone- Clone	h1b5	9.078	1014.442	166.504	3996.114	14.672
Ctrl MO C-C	Clone- Clone	h1b5	9.078	953.951	156.676	4094.844	14.672
Ctrl MO C-C	Clone- Clone	h1b5	9.078	806.429	124.106	3947.286	14.672
Ctrl MO C-C	Clone- Clone
Ctrl MO C-C	Clone- Clone	h1b6	5.295	438.931	48.328	1124.752	8.522
Ctrl MO C-C	Clone- Clone	h1b6	5.295	524.272	66.139	1700.638	8.522
Ctrl MO C-C	Clone- Clone	h1b6	5.295	633.396	158.074	1881.233	8.522
Ctrl MO C-C	Clone- Clone	h1b6	5.295	804.875	194.081	2490.422	8.522
Ctrl MO C-C	Clone- Clone	h1b6	5.295	1138.184	171.258	3394.639	8.522
Ctrl MO C-C	Clone- Clone	h1b6	5.295	1274.538	223.689	3942.528	8.522
Ctrl MO C-C	Clone- Clone	h1b6	5.295	1228.406	208.839	4095	8.522
Ctrl MO C-C	Clone- Clone	h1b6	5.295	1019.718	116.258	4095	8.522
Ctrl MO C-C	Clone- Clone	h1b6	5.295	746.765	61.293	4095	8.522
Ctrl MO C-C	Clone- Clone
Ctrl MO C-C	Clone- Clone	h1b7	8.429	725.225	90.522	1946.853	13.618
Ctrl MO C-C	Clone- Clone	h1b7	8.429	873.692	86.264	2642.943	13.618
Ctrl MO C-C	Clone- Clone	h1b7	8.429	885.016	169.544	3097.024	13.618
Ctrl MO C-C	Clone- Clone	h1b7	8.429	855.493	163.827	3075.481	13.618
Ctrl MO C-C	Clone- Clone	h1b7	8.429	833.512	162.228	2885.116	13.618
Ctrl MO C-C	Clone- Clone	h1b7	8.429	690.186	121.28	2374.489	13.618
Ctrl MO C-C	Clone- Clone	h1b7	8.429	500.041	71.08	1957.877	13.618
Ctrl MO C-C	Clone- Clone	h1b7	8.429	304.869	23.49	1477.914	13.618
Ctrl MO C-C	Clone- Clone
Ctrl MO C-C	Clone- Clone	h1b8	9.024	499.899	15.592	1578.627	14.585
Ctrl MO C-C	Clone- Clone	h1b8	9.024	670.093	14.536	1973.108	14.585
Ctrl MO C-C	Clone- Clone	h1b8	9.024	873.112	56.409	2865.45	14.585
Ctrl MO C-C	Clone- Clone	h1b8	9.024	1096.111	81.501	3826.167	14.585
Ctrl MO C-C	Clone- Clone	h1b8	9.024	1212.834	127.525	3826.866	14.585
Ctrl MO C-C	Clone- Clone	h1b8	8.97	1331.284	192.833	3810.23	14.497
Ctrl MO C-C	Clone- Clone	h1b8	8.97	1288.742	235.49	3602.914	14.497
Ctrl MO C-C	Clone- Clone	h1b8	8.97	1155.639	302.176	3361.307	14.497
Ctrl MO C-C	Clone- Clone	h1b8	8.97	948.485	278.096	3202.125	14.497
Ctrl MO C-C	Clone- Clone
Ctrl MO C-C	Clone- Clone	h1b9	7.078	544.746	19.218	1452.416	11.422
Ctrl MO C-C	Clone- Clone	h1b9	7.078	717.117	53.523	2152.998	11.422
Ctrl MO C-C	Clone- Clone	h1b9	7.078	756.838	79.856	2616.327	11.422
Ctrl MO C-C	Clone- Clone	h1b9	7.078	553.764	94.899	1889.286	11.422
Ctrl MO C-C	Clone- Clone	h1b9	7.078	488.721	65.757	1666.746	11.422
Ctrl MO C-C	Clone- Clone	h1b9	7.078	444.523	103.186	1454.012	11.422
Ctrl MO C-C	Clone- Clone	h1b9	7.078	407.853	67.735	1272.936	11.422
Ctrl MO C-C	Clone- Clone	h1b9	7.078	391.149	60.937	1680.16	11.422
Ctrl MO C-C	Clone- Clone
Ctrl MO C-C	Clone- Clone	h1b10	11.888	675.543	40.917	2388.612	19.241
Ctrl MO C-C	Clone- Clone	h1b10	11.888	886.342	71.207	3300.523	19.241
Ctrl MO C-C	Clone- Clone	h1b10	11.888	1108.797	87.033	4069.337	19.241
Ctrl MO C-C	Clone- Clone	h1b10	11.888	1113.332	147.184	4095	19.241
Ctrl MO C-C	Clone- Clone	h1b10	11.888	965.601	162.103	3834.094	19.241
Ctrl MO C-C	Clone- Clone	h1b10	11.888	738.834	195.681	2582.773	19.241
Ctrl MO C-C	Clone- Clone	h1b10	11.888	556.41	73.014	2639.563	19.241
Ctrl MO C-C	Clone- Clone	h1b10	11.888	418.584	38.489	2560.912	19.241
Ctrl MO C-C	Clone- Clone
Ctrl MO C-C	Clone- Clone	h1b11	11.779	302.61	7.281	1036.536	19.065
Ctrl MO C-C	Clone- Clone	h1b11	11.779	307.681	27.105	1188.819	19.065
Ctrl MO C-C	Clone- Clone	h1b11	11.779	261.534	29.635	998.352	19.065
Ctrl MO C-C	Clone- Clone	h1b11	11.779	245.958	52.799	891.599	19.065
Ctrl MO C-C	Clone- Clone	h1b11	13.184	767.319	81.998	2717.625	21.35
Ctrl MO C-C	Clone- Clone	h1b11	13.184	707.297	77.226	2640.682	21.35
Ctrl MO C-C	Clone- Clone	h1b11	13.184	612.783	88.482	3229.97	21.35
Ctrl MO C-C	Clone- Clone	h1b11	13.184	550.007	66.485	3827.394	21.35
Ctrl MO C-C	Clone- Clone	h1b11	13.184	503.099	36.425	2417.71	21.35
Ctrl MO C-C	Clone- Clone
Ctrl MO C-C	Clone- Clone	h1b12	3.296	581.585	0	1867.684	5.271
Ctrl MO C-C	Clone- Clone	h1b12	3.296	733.045	0	2802.491	5.271
Ctrl MO C-C	Clone- Clone	h1b12	3.296	853.452	0	2248.305	5.271
Ctrl MO C-C	Clone- Clone	h1b12	3.296	829.55	0	2379.529	5.271
Ctrl MO C-C	Clone- Clone	h1b12	3.296	689.882	0	2450.467	5.271
Ctrl MO C-C	Clone- Clone	h1b12	3.296	547.98	0	1682.201	5.271
Ctrl MO C-C	Clone- Clone	h1b12	3.296	339.992	0	1005.382	5.271
Ctrl MO C-C	Clone- Clone
Ctrl MO C-C	Clone- Clone	h1b13	5.295	387.941	0	1129.131	8.522
Ctrl MO C-C	Clone- Clone	h1b13	5.295	492.719	0	1455.525	8.522
Ctrl MO C-C	Clone- Clone	h1b13	5.295	493.894	0	2189.152	8.522
Ctrl MO C-C	Clone- Clone	h1b13	5.295	483.309	0	2224.46	8.522
Ctrl MO C-C	Clone- Clone	h1b13	5.295	495.46	0	1824.136	8.522
Ctrl MO C-C	Clone- Clone	h1b13	5.295	508.539	0	1474.675	8.522
Ctrl MO C-C	Clone- Clone	h1b13	5.295	410.55	0	1053.251	8.522
Ctrl MO C-C	Clone- Clone
Ctrl MO C-C	Clone- Clone	h1b14	8.483	180.28	2.03	605.197	13.706
Ctrl MO C-C	Clone- Clone	h1b14	8.483	203.827	6.959	707.515	13.706
Ctrl MO C-C	Clone- Clone	h1b14	8.483	237.713	16.539	1055.788	13.706
Ctrl MO C-C	Clone- Clone	h1b14	8.483	256.006	30.528	1234.752	13.706
Ctrl MO C-C	Clone- Clone	h1b14	9.132	653.811	48.728	2570.146	14.76
Ctrl MO C-C	Clone- Clone	h1b14	9.132	715.972	51.711	2488.139	14.76
Ctrl MO C-C	Clone- Clone	h1b14	9.132	786.017	114.595	3388.551	14.76
Ctrl MO C-C	Clone- Clone	h1b14	9.132	750.583	135.282	3996.9	14.76
Ctrl MO C-C	Clone- Clone	h1b14	9.132	614.522	96.534	2936.496	14.76
Ctrl MO C-C	Clone- Clone
Ctrl MO C-C	Clone- Clone	h1b15	9.942	248.789	17.234	855.492	16.078
Ctrl MO C-C	Clone- Clone	h1b15	9.942	310.779	32.495	1055.751	16.078
Ctrl MO C-C	Clone- Clone	h1b15	9.942	422.777	49.637	1572.36	16.078
Ctrl MO C-C	Clone- Clone	h1b15	9.942	597.477	62.791	1942.648	16.078
Ctrl MO C-C	Clone- Clone	h1b15	9.942	848.789	61.959	2938.281	16.078
Ctrl MO C-C	Clone- Clone	h1b15	9.942	937.132	75.758	3040.471	16.078
Ctrl MO C-C	Clone- Clone	h1b15	9.942	907.554	78.206	2490.245	16.078
Ctrl MO C-C	Clone- Clone	h1b15	9.942	759.272	75.668	2306.861	16.078
Ctrl MO C-C	Clone- Clone	h1b15	9.942	497.08	57.188	1838.8	16.078
Ctrl MO C-C	Clone- Clone
Ctrl MO C-C	Clone- Clone	h1b16	8.862	359.297	66.257	1189.715	14.321
Ctrl MO C-C	Clone- Clone	h1b16	8.862	482.3	22.81	1625.812	14.321
Ctrl MO C-C	Clone- Clone	h1b16	8.862	595.165	73.035	2338.393	14.321
Ctrl MO C-C	Clone- Clone	h1b16	8.862	713.087	98.36	2563.109	14.321
Ctrl MO C-C	Clone- Clone	h1b16	8.862	788.113	94.56	2796.821	14.321
Ctrl MO C-C	Clone- Clone	h1b16	8.862	858.337	140.278	2848.196	14.321
Ctrl MO C-C	Clone- Clone	h1b16	8.862	844.23	122.321	2528.25	14.321
Ctrl MO C-C	Clone- Clone	h1b16	8.862	704.382	84.089	3823.948	14.321
Ctrl MO C-C	Clone- Clone	h1b16	8.862	589.656	71.819	3810.084	14.321
Ctrl MO C-C	Clone- Clone
Ctrl MO C-C	Clone- Clone	h1b17	10.753	325.119	19.404	1008.138	17.394
Ctrl MO C-C	Clone- Clone	h1b17	10.753	428.525	37.084	1449.053	17.394
Ctrl MO C-C	Clone- Clone	h1b17	10.753	534.441	61.868	1628.36	17.394
Ctrl MO C-C	Clone- Clone	h1b17	10.753	601.237	69.531	2208.274	17.394
Ctrl MO C-C	Clone- Clone	h1b17	10.753	607.318	79.616	2240.861	17.394
Ctrl MO C-C	Clone- Clone	h1b17	10.753	618.034	61.643	2595.097	17.394
Ctrl MO C-C	Clone- Clone	h1b17	10.753	580.74	43.195	2679.05	17.394
Ctrl MO C-C	Clone- Clone
Ctrl MO C-C	Clone- Clone	h1b18	11.888	366.935	27.622	1107.507	19.241
Ctrl MO C-C	Clone- Clone	h1b18	11.888	480.444	70.649	1489.431	19.241
Ctrl MO C-C	Clone- Clone	h1b18	11.888	610.375	69.329	1858.497	19.241
Ctrl MO C-C	Clone- Clone	h1b18	11.888	743.943	91.322	2460.253	19.241
Ctrl MO C-C	Clone- Clone	h1b18	11.888	761.786	103.466	2278.161	19.241
Ctrl MO C-C	Clone- Clone	h1b18	11.888	725.215	47.564	2559.779	19.241
Ctrl MO C-C	Clone- Clone	h1b18	11.888	636.687	52.107	2778.573	19.241
Ctrl MO C-C	Clone- Clone	h1b18	11.888	444.02	12.555	2474.753	19.241
Ctrl MO C-C	Clone- Clone
Ctrl MO C-C	Clone- Clone	h1b19	7.727	396.31	19.63	1118.395	12.476
Ctrl MO C-C	Clone- Clone	h1b19	7.727	531.745	29.517	1854.323	12.476
Ctrl MO C-C	Clone- Clone	h1b19	7.727	624.161	59.975	2479.083	12.476
Ctrl MO C-C	Clone- Clone	h1b19	7.727	741.245	54.802	2951.35	12.476
Ctrl MO C-C	Clone- Clone	h1b19	7.187	966.608	220.913	2429.191	11.597
Ctrl MO C-C	Clone- Clone	h1b19	7.187	789.001	219.623	2919.842	11.597
Ctrl MO C-C	Clone- Clone	h1b19	7.187	591.228	184.042	3417.768	11.597
Ctrl MO C-C	Clone- Clone	h1b19	7.187	301.49	34.065	954.415	11.597
Ctrl MO C-C	Clone- Clone	h2b1	10.05	186.933	16.573	706.358	16.254
Ctrl MO C-C	Clone- Clone	h2b1	10.05	315.202	7.305	1396.523	16.254
Ctrl MO C-C	Clone- Clone	h2b1	10.05	456.643	47.146	2005.115	16.254
Ctrl MO C-C	Clone- Clone	h2b1	10.05	518.504	53.249	2089.537	16.254
Ctrl MO C-C	Clone- Clone	h2b1	10.05	483.754	69.929	1889.661	16.254
Ctrl MO C-C	Clone- Clone	h2b1	10.05	452.954	83.01	2068.187	16.254
Ctrl MO C-C	Clone- Clone	h2b1	10.05	417.734	85.849	1178.87	16.254
Ctrl MO C-C	Clone- Clone	h2b1	10.05	357.192	62.508	1324.165	16.254
Ctrl MO C-C	Clone- Clone	h2b1	10.05	265.982	24.242	1653.957	16.254
Ctrl MO C-C	Clone- Clone
Ctrl MO C-C	Clone- Clone	h2b2	10.321	136.628	5.027	478.425	16.693
Ctrl MO C-C	Clone- Clone	h2b2	10.321	227.626	10.371	731.141	16.693
Ctrl MO C-C	Clone- Clone	h2b2	10.321	329.269	25.098	1140.48	16.693
Ctrl MO C-C	Clone- Clone	h2b2	10.321	414.308	48.943	1537.153	16.693
Ctrl MO C-C	Clone- Clone	h2b2	10.321	423.088	45.209	1529.955	16.693
Ctrl MO C-C	Clone- Clone	h2b2	10.321	413.195	53.996	2098.146	16.693
Ctrl MO C-C	Clone- Clone	h2b2	10.321	347.574	16.732	1378.202	16.693
Ctrl MO C-C	Clone- Clone	h2b2	10.321	274.357	6.077	994.493	16.693
Ctrl MO C-C	Clone- Clone
Ctrl MO C-C	Clone- Clone	h2b3	3.458	263.325	27.951	710.208	5.535
Ctrl MO C-C	Clone- Clone	h2b3	3.458	462.241	59.956	1365.701	5.535
Ctrl MO C-C	Clone- Clone	h2b3	3.458	718.923	95.208	2004.407	5.535
Ctrl MO C-C	Clone- Clone	h2b3	3.458	889.719	146.514	2365.158	5.535
Ctrl MO C-C	Clone- Clone	h2b3	3.458	889.948	139.751	3153.291	5.535
Ctrl MO C-C	Clone- Clone	h2b3	3.458	829.504	127.234	3047.219	5.535
Ctrl MO C-C	Clone- Clone	h2b3	3.458	674.677	128.165	1938.832	5.535
Ctrl MO C-C	Clone- Clone	h2b3	3.458	447.767	47.871	1820.898	5.535
Ctrl MO C-C	Clone- Clone
Ctrl MO C-C	Clone- Clone	h2b4	2.918	232.467	45.083	690.43	4.587
Ctrl MO C-C	Clone- Clone	h2b4	2.918	434.993	116.059	1106.618	4.587
Ctrl MO C-C	Clone- Clone	h2b4	2.918	616.579	137.418	1527.321	4.587
Ctrl MO C-C	Clone- Clone	h2b4	2.918	612.589	148.46	1488.537	4.587
Ctrl MO C-C	Clone- Clone	h2b4	2.918	607.75	194.349	1348.243	4.587
Ctrl MO C-C	Clone- Clone	h2b4	2.918	515.696	213.455	1073.471	4.587
Ctrl MO C-C	Clone- Clone	h2b4	2.918	380.619	94.257	1026.785	4.587
Ctrl MO C-C	Clone- Clone	h2b4	2.918	242.633	40.91	653.416	4.587
Ctrl MO C-C	Clone- Clone
Ctrl MO C-C	Clone- Clone	h2b5	10.05	473.293	49.422	1383.292	16.254
Ctrl MO C-C	Clone- Clone	h2b5	10.05	663.409	73.318	2028.474	16.254
Ctrl MO C-C	Clone- Clone	h2b5	10.05	630.93	63.895	2596.086	16.254
Ctrl MO C-C	Clone- Clone	h2b5	9.78	892.554	65.821	2913.88	15.815
Ctrl MO C-C	Clone- Clone	h2b5	9.78	1001.4	116.007	3702.227	15.815
Ctrl MO C-C	Clone- Clone	h2b5	9.78	954.132	148.352	2981.954	15.815
Ctrl MO C-C	Clone- Clone	h2b5	9.78	791.332	103.029	2638.992	15.815
Ctrl MO C-C	Clone- Clone	h2b5	9.78	643.994	36.538	3344.826	15.815
Ctrl MO C-C	Clone- Clone	h2b5	9.78	530.528	37.051	2204.445	15.815
Ctrl MO C-C	Clone- Clone	h2b5	9.78	438.847	21.392	2218.346	15.815
Ctrl MO C-C	Clone- Clone
Ctrl MO C-C	Clone- Clone	h2b6	6.916	407.676	82.738	1078.572	11.158
Ctrl MO C-C	Clone- Clone	h2b6	6.916	660.981	99.408	1673.239	11.158
Ctrl MO C-C	Clone- Clone	h2b6	6.916	959.588	43.433	2982.122	11.158
Ctrl MO C-C	Clone- Clone	h2b6	6.916	841.585	73.639	2605.429	11.158
Ctrl MO C-C	Clone- Clone	h2b6	6.916	640.961	100.701	3391.513	11.158
Ctrl MO C-C	Clone- Clone	h2b6	6.916	470.11	49.166	1709.718	11.158
Ctrl MO C-C	Clone- Clone
Ctrl MO C-C	Clone- Clone	h2b7	7.727	463.031	62.289	1543.21	12.473
Ctrl MO C-C	Clone- Clone	h2b7	7.727	479.241	75.437	2538.39	12.473
Ctrl MO C-C	Clone- Clone	h2b7	7.727	435.983	65.652	2437.438	12.473
Ctrl MO C-C	Clone- Clone	h2b7	7.727	381.89	60.915	2388.322	12.473
Ctrl MO C-C	Clone- Clone	h2b7	7.943	845.98	151.902	2445.193	12.825
Ctrl MO C-C	Clone- Clone	h2b7	7.943	678.248	137.84	1677.587	12.825
Ctrl MO C-C	Clone- Clone	h2b7	7.943	473.325	135.201	2159.151	12.825
Ctrl MO C-C	Clone- Clone	h2b7	7.943	425.574	106.041	2207.312	12.825
Ctrl MO C-C	Clone- Clone
Ctrl MO C-C	Clone- Clone	h2b8	8.7	344.746	84.116	760.822	14.057
Ctrl MO C-C	Clone- Clone	h2b8	8.7	545.432	108.435	1422.647	14.057
Ctrl MO C-C	Clone- Clone	h2b8	8.7	807.262	118.894	2157.229	14.057
Ctrl MO C-C	Clone- Clone	h2b8	8.7	901.652	94.964	2719.924	14.057
Ctrl MO C-C	Clone- Clone	h2b8	8.7	987.383	116.699	2976.179	14.057
Ctrl MO C-C	Clone- Clone	h2b8	8.7	1028.795	108.314	3042.338	14.057
Ctrl MO C-C	Clone- Clone	h2b8	8.7	936.745	89.999	3033.762	14.057
Ctrl MO C-C	Clone- Clone	h2b8	8.7	835.829	27.521	2838.445	14.057
Ctrl MO C-C	Clone- Clone	h2b8	8.7	782.694	23.547	3330.044	14.057
Ctrl MO C-C	Clone- Clone
Ctrl MO C-C	Clone- Clone	h3b1	17.453	226.522	23.743	697.974	28.291
Ctrl MO C-C	Clone- Clone	h3b1	17.453	353.137	35.73	1206.823	28.291
Ctrl MO C-C	Clone- Clone	h3b1	17.453	400.856	20.061	1515.378	28.291
Ctrl MO C-C	Clone- Clone	h3b1	17.453	411.354	43.855	2286.547	28.291
Ctrl MO C-C	Clone- Clone	h3b1	17.453	335.675	9.892	3141.884	28.291
Ctrl MO C-C	Clone- Clone	h3b1	17.453	233.153	4.116	2364.19	28.291
Ctrl MO C-C	Clone- Clone
Ctrl MO C-C	Clone- Clone	h3b2	13.671	210.211	13.521	823.388	22.14
Ctrl MO C-C	Clone- Clone	h3b2	13.671	311.206	25.464	1223.727	22.14
Ctrl MO C-C	Clone- Clone	h3b2	13.671	391.083	36.824	2270.055	22.14
Ctrl MO C-C	Clone- Clone	h3b2	13.671	480.205	38.084	1834.623	22.14
Ctrl MO C-C	Clone- Clone	h3b2	13.671	459.811	56.384	1895.477	22.14
Ctrl MO C-C	Clone- Clone	h3b2	13.671	368.892	53.865	1599.841	22.14
Ctrl MO C-C	Clone- Clone
Ctrl MO C-C	Clone- Clone	h3b3	12.914	175.649	8.605	553.885	20.91
Ctrl MO C-C	Clone- Clone	h3b3	12.914	221.048	22.14	977.135	20.91
Ctrl MO C-C	Clone- Clone	h3b3	12.914	264.537	22.789	1418.445	20.91
Ctrl MO C-C	Clone- Clone	h3b3	12.914	336.865	9.866	2196.291	20.91
Ctrl MO C-C	Clone- Clone	h3b3	12.914	431.95	62.855	2389.712	20.91
Ctrl MO C-C	Clone- Clone	h3b3	12.914	392.894	29.485	2399.109	20.91
Ctrl MO C-C	Clone- Clone
Ctrl MO C-C	Clone- Clone	h3b4	8.916	277.889	56.678	1026.475	14.409
Ctrl MO C-C	Clone- Clone	h3b4	8.916	329.69	55.386	1359.51	14.409
Ctrl MO C-C	Clone- Clone	h3b4	8.916	400.034	54.03	1118.578	14.409
Ctrl MO C-C	Clone- Clone	h3b4	8.916	512.212	84.725	1570.298	14.409
Ctrl MO C-C	Clone- Clone	h3b4	8.916	449.1	54.481	1728.427	14.409
Ctrl MO C-C	Clone- Clone	h3b4	8.916	378.153	48.038	1369.427	14.409
Ctrl MO C-C	Clone- Clone	h4b1	7.781	350.83	39.377	848.189	12.564
Ctrl MO C-C	Clone- Clone	h4b1	7.781	761.208	62.677	2142.693	12.564
Ctrl MO C-C	Clone- Clone	h4b1	7.781	972.791	60.232	3293.226	12.564
Ctrl MO C-C	Clone- Clone	h4b1	7.673	1349.286	197.075	3478.449	12.388
Ctrl MO C-C	Clone- Clone	h4b1	7.673	1374.261	200.998	3737.895	12.388
Ctrl MO C-C	Clone- Clone	h4b1	7.673	1155.449	198.16	3551.741	12.388
Ctrl MO C-C	Clone- Clone	h4b1	7.673	994.947	229.393	3804.47	12.388
Ctrl MO C-C	Clone- Clone	h4b1	7.673	986.282	179.295	3549.29	12.388
Ctrl MO C-C	Clone- Clone	h4b1	8.321	1539.965	205.714	3666.528	13.442
Ctrl MO C-C	Clone- Clone	h4b1	8.321	1257.671	171.711	3599.078	13.442
Ctrl MO C-C	Clone- Clone	h4b1	8.321	814.041	218.823	3026.484	13.442
Ctrl MO C-C	Clone- Clone	h4b1	8.321	597.365	150.076	2651.241	13.442
Ctrl MO C-C	Clone- Clone	h4b1	8.321	518.2	61.112	1750.225	13.442
Ctrl MO C-C	Clone- Clone
Ctrl MO C-C	Clone- Clone	h4b2	5.511	532.831	99.597	1677.163	8.866
Ctrl MO C-C	Clone- Clone	h4b2	5.511	960.847	113.213	2615.701	8.866
Ctrl MO C-C	Clone- Clone	h4b2	5.511	1037.607	66.144	3002.007	8.866
Ctrl MO C-C	Clone- Clone	h4b2	5.511	1022.968	103.789	3611.194	8.866
Ctrl MO C-C	Clone- Clone	h4b2	5.511	890.468	92.733	3578.552	8.866
Ctrl MO C-C	Clone- Clone	h4b2	5.511	646.637	106.962	3360.179	8.866
Ctrl MO C-C	Clone- Clone	h4b2	5.511	537.791	169.354	1770.659	8.866
Ctrl MO C-C	Clone- Clone	h4b2	4.971	1068.533	415.154	2845.284	7.995
Ctrl MO C-C	Clone- Clone	h4b2	4.971	830.961	284.161	2134.294	7.995
Ctrl MO C-C	Clone- Clone	h4b2	4.971	623.675	228.187	1375.722	7.995
Ctrl MO C-C	Clone- Clone
Ctrl MO C-C	Clone- Clone	h4b3	7.403	1265.326	139.43	3648.523	11.949
Ctrl MO C-C	Clone- Clone	h4b3	7.403	1160.238	205.949	3837.474	11.949
Ctrl MO C-C	Clone- Clone	h4b3	7.403	721.875	124.637	2371.893	11.949
Ctrl MO C-C	Clone- Clone	h4b3	7.403	552.74	70.508	2148.285	11.949
Ctrl MO C-C	Clone- Clone	h4b3	7.403	385.115	30.779	1873.073	11.949
Ctrl MO N-C	Non Clone- Clone	h1b1	13.725	496.468	19.882	1606.192	22.228
Ctrl MO N-C	Non Clone- Clone	h1b1	13.725	582.858	28.828	1507.145	22.228
Ctrl MO N-C	Non Clone- Clone	h1b1	13.725	507.281	35.193	2709.251	22.228
Ctrl MO N-C	Non Clone- Clone	h1b1	13.725	455.076	37.942	2493.334	22.228
Ctrl MO N-C	Non Clone- Clone	h1b1	13.725	384.173	45.196	2416.066	22.228
Ctrl MO N-C	Non Clone- Clone	h1b1	13.725	352.432	40.808	2613.958	22.228
Ctrl MO N-C	Non Clone- Clone	h1b1	12.32	755.92	97.626	2365.048	19.944
Ctrl MO N-C	Non Clone- Clone	h1b1	12.32	609.847	39.442	2914.268	19.944
Ctrl MO N-C	Non Clone- Clone	h1b1	12.32	472.553	27.546	2097.21	19.944
Ctrl MO N-C	Non Clone- Clone
Ctrl MO N-C	Non Clone- Clone	h1b2	10.212	312.853	4.53	930.036	16.517
Ctrl MO N-C	Non Clone- Clone	h1b2	10.212	411.995	7.526	1455.986	16.517
Ctrl MO N-C	Non Clone- Clone	h1b2	10.212	501.226	24.343	1534.119	16.517
Ctrl MO N-C	Non Clone- Clone	h1b2	10.212	590.733	40.349	2786.538	16.517
Ctrl MO N-C	Non Clone- Clone	h1b2	10.212	611.335	36.741	3552.342	16.517
Ctrl MO N-C	Non Clone- Clone	h1b2	10.212	630.51	58.525	2947.094	16.517
Ctrl MO N-C	Non Clone- Clone	h1b2	10.212	634.312	70.72	3886.267	16.517
Ctrl MO N-C	Non Clone- Clone	h1b2	10.212	527.914	92.001	2065.444	16.517
Ctrl MO N-C	Non Clone- Clone
Ctrl MO N-C	Non Clone- Clone	h1b3	9.132	313.222	11.18	942.251	14.708
Ctrl MO N-C	Non Clone- Clone	h1b3	9.132	397.91	27.809	1203.871	14.708
Ctrl MO N-C	Non Clone- Clone	h1b3	9.132	494.871	27.384	1826.293	14.708
Ctrl MO N-C	Non Clone- Clone	h1b3	9.132	645.997	46.054	3242.481	14.708
Ctrl MO N-C	Non Clone- Clone	h1b3	9.132	837.838	53.157	3870.215	14.708
Ctrl MO N-C	Non Clone- Clone	h1b3	9.132	952.903	40.557	3715.822	14.708
Ctrl MO N-C	Non Clone- Clone	h1b3	9.132	995.677	36.109	3929.901	14.708
Ctrl MO N-C	Non Clone- Clone	h1b3	9.132	978.05	49.652	3755.792	14.708
Ctrl MO N-C	Non Clone- Clone	h1b3	9.132	911.735	27.796	3956.157	14.708
Ctrl MO N-C	Non Clone- Clone
Ctrl MO N-C	Non Clone- Clone	h1b4	11.833	605.306	73.011	1644.684	19.153
Ctrl MO N-C	Non Clone- Clone	h1b4	11.833	790.151	53.769	2673.825	19.153
Ctrl MO N-C	Non Clone- Clone	h1b4	11.833	935.075	150.258	2818.141	19.153
Ctrl MO N-C	Non Clone- Clone	h1b4	11.833	947.492	126.956	2898.048	19.153
Ctrl MO N-C	Non Clone- Clone	h1b4	11.833	922.019	146.72	2370.781	19.153
Ctrl MO N-C	Non Clone- Clone	h1b4	11.833	817.662	166.246	2738.043	19.153
Ctrl MO N-C	Non Clone- Clone	h1b4	11.833	569.055	68.975	2093.813	19.153
Ctrl MO N-C	Non Clone- Clone
Ctrl MO N-C	Non Clone- Clone	h1b5	11.239	309.616	16.823	882.847	18.187
Ctrl MO N-C	Non Clone- Clone	h1b5	11.239	400.979	21.816	1166.331	18.187
Ctrl MO N-C	Non Clone- Clone	h1b5	11.239	540.584	52.582	1361.925	18.187
Ctrl MO N-C	Non Clone- Clone	h1b5	11.239	726.342	80.472	2014.083	18.187
Ctrl MO N-C	Non Clone- Clone	h1b5	11.239	975.742	79.106	3025.939	18.187
Ctrl MO N-C	Non Clone- Clone	h1b5	11.239	999.451	109.856	2960.222	18.187
Ctrl MO N-C	Non Clone- Clone	h1b5	11.239	952.314	117.994	2627.895	18.187
Ctrl MO N-C	Non Clone- Clone	h1b5	11.239	835.854	122.968	2817.848	18.187
Ctrl MO N-C	Non Clone- Clone
Ctrl MO N-C	Non Clone- Clone	h1b6	14.751	679.781	49.691	2093.812	23.897
Ctrl MO N-C	Non Clone- Clone	h1b6	14.751	789.103	91.581	2606.068	23.897
Ctrl MO N-C	Non Clone- Clone	h1b6	14.751	832.922	124.291	2805.81	23.897
Ctrl MO N-C	Non Clone- Clone	h1b6	14.751	948.562	105.482	3553.956	23.897
Ctrl MO N-C	Non Clone- Clone	h1b6	14.751	948.562	105.482	3553.956	23.897
Ctrl MO N-C	Non Clone- Clone	h1b6	14.751	976.712	100.462	3421.097	23.897
Ctrl MO N-C	Non Clone- Clone	h1b6	14.751	904.193	116.687	3482.138	23.897
Ctrl MO N-C	Non Clone- Clone	h1b6	14.751	834.595	90.402	4080.467	23.897
Ctrl MO N-C	Non Clone- Clone	h1b6	14.751	777.504	49.033	4095	23.897
Ctrl MO N-C	Non Clone- Clone
Ctrl MO N-C	Non Clone- Clone	h1b7	8.321	321.543	29.527	1051.744	13.442
Ctrl MO N-C	Non Clone- Clone	h1b7	8.321	417.158	38.575	1473.838	13.442
Ctrl MO N-C	Non Clone- Clone	h1b7	8.321	572.724	29.766	2111.242	13.442
Ctrl MO N-C	Non Clone- Clone	h1b7	8.321	768.162	60.759	3102.555	13.442
Ctrl MO N-C	Non Clone- Clone	h1b7	8.321	925.807	125.06	3451.487	13.442
Ctrl MO N-C	Non Clone- Clone	h1b7	8.321	874.935	109.664	3561.323	13.442
Ctrl MO N-C	Non Clone- Clone	h1b7	8.321	813.459	145.777	3605.399	13.442
Ctrl MO N-C	Non Clone- Clone
Ctrl MO N-C	Non Clone- Clone	h1b8	5.728	467.992	65.256	1172.567	9.225
Ctrl MO N-C	Non Clone- Clone	h1b8	5.728	592.096	113.213	1728.543	9.225
Ctrl MO N-C	Non Clone- Clone	h1b8	5.728	737.263	143.097	2496.49	9.225
Ctrl MO N-C	Non Clone- Clone	h1b8	5.728	915.548	107.876	2886.634	9.225
Ctrl MO N-C	Non Clone- Clone	h1b8	5.728	1042.045	173.776	2854.202	9.225
Ctrl MO N-C	Non Clone- Clone	h1b8	5.728	999.785	166.535	2856.97	9.225
Ctrl MO N-C	Non Clone- Clone	h1b8	5.728	874.471	205.716	2084.301	9.225
Ctrl MO N-C	Non Clone- Clone	h1b8	5.728	864.141	228.6	2918.929	9.225
Ctrl MO N-C	Non Clone- Clone	h1b8	5.728	882.559	188.213	2582.449	9.225
Ctrl MO N-C	Non Clone- Clone
Ctrl MO N-C	Non Clone- Clone	h1b9	8.754	644.094	41.036	2726.893	14.145
Ctrl MO N-C	Non Clone- Clone	h1b9	8.754	883.306	106.8	3233	14.145
Ctrl MO N-C	Non Clone- Clone	h1b9	8.754	1213.962	189.008	3721.841	14.145
Ctrl MO N-C	Non Clone- Clone	h1b9	8.754	1262.689	219.973	4090.011	14.145
Ctrl MO N-C	Non Clone- Clone	h1b9	8.754	1100.715	199.17	3557.133	14.145
Ctrl MO N-C	Non Clone- Clone	h1b9	8.754	881.188	196.252	3095.486	14.145
Ctrl MO N-C	Non Clone- Clone	h1b9	8.754	753.122	94.111	2643.436	14.145
Ctrl MO N-C	Non Clone- Clone	h1b9	8.754	601.559	39.677	2788.658	14.145
Ctrl MO N-C	Non Clone- Clone
Ctrl MO N-C	Non Clone- Clone	h1b10	5.241	617.302	86.012	1364.797	8.434
Ctrl MO N-C	Non Clone- Clone	h1b10	5.241	868.749	144.01	2401.384	8.434
Ctrl MO N-C	Non Clone- Clone	h1b10	5.241	1173.692	153.904	3421.368	8.434
Ctrl MO N-C	Non Clone- Clone	h1b10	5.241	1262.771	182.499	3239.233	8.434
Ctrl MO N-C	Non Clone- Clone	h1b10	5.241	1091.495	137.555	2855.862	8.434
Ctrl MO N-C	Non Clone- Clone	h1b10	5.241	903.54	162.992	2121.298	8.434
Ctrl MO N-C	Non Clone- Clone	h1b10	5.241	701.868	210.912	1768.121	8.434
Ctrl MO N-C	Non Clone- Clone	h1b10	5.241	537.013	89.13	2016.22	8.434
Ctrl MO N-C	Non Clone- Clone
Ctrl MO N-C	Non Clone- Clone	h1b11	13.455	1052.839	125.489	3687.238	21.789
Ctrl MO N-C	Non Clone- Clone	h1b11	13.455	1493.528	209.32	4092.716	21.789
Ctrl MO N-C	Non Clone- Clone	h1b11	13.455	1628.58	121.004	4095	21.789
Ctrl MO N-C	Non Clone- Clone	h1b11	13.455	1446.965	213.858	4095	21.789
Ctrl MO N-C	Non Clone- Clone	h1b11	13.455	1112.451	157.01	3931.092	21.789
Ctrl MO N-C	Non Clone- Clone	h1b11	13.455	800.031	101.734	3787.816	21.789
Ctrl MO N-C	Non Clone- Clone	h1b11	13.455	640.33	67.098	2787.499	21.789
Ctrl MO N-C	Non Clone- Clone	h2b1	5.025	273.963	30.305	879.872	8.083
Ctrl MO N-C	Non Clone- Clone	h2b1	5.025	441.046	44.479	1432.463	8.083
Ctrl MO N-C	Non Clone- Clone	h2b1	5.025	603.552	56.866	2023.762	8.083
Ctrl MO N-C	Non Clone- Clone	h2b1	5.025	645.43	118.569	2036.651	8.083
Ctrl MO N-C	Non Clone- Clone	h2b1	5.025	650.808	161.793	1983.667	8.083
Ctrl MO N-C	Non Clone- Clone	h2b1	5.025	574.53	164.674	1494.266	8.083
Ctrl MO N-C	Non Clone- Clone	h2b1	5.025	426.764	101.863	1081.243	8.083
Ctrl MO N-C	Non Clone- Clone
Ctrl MO N-C	Non Clone- Clone	h2b2	8.916	290.558	10.997	1148.54	14.409
Ctrl MO N-C	Non Clone- Clone	h2b2	8.916	387.072	57.067	1243.704	14.409
Ctrl MO N-C	Non Clone- Clone	h2b2	8.916	428.044	56.668	1771.452	14.409
Ctrl MO N-C	Non Clone- Clone	h2b2	8.916	449.514	62.623	2320.332	14.409
Ctrl MO N-C	Non Clone- Clone	h2b2	8.916	426.718	111.336	1983.015	14.409
Ctrl MO N-C	Non Clone- Clone	h2b2	8.916	351.835	64.971	1155.11	14.409
Ctrl MO N-C	Non Clone- Clone
Ctrl MO N-C	Non Clone- Clone	h2b3	5.728	221.868	14.399	545.035	9.225
Ctrl MO N-C	Non Clone- Clone	h2b3	5.728	326.066	29.246	904.749	9.225
Ctrl MO N-C	Non Clone- Clone	h2b3	5.728	361.592	57.39	1234.438	9.225
Ctrl MO N-C	Non Clone- Clone	h2b3	5.728	337.597	63.256	1130.134	9.225
Ctrl MO N-C	Non Clone- Clone	h2b3	5.728	339.003	56.669	1461.15	9.225
Ctrl MO N-C	Non Clone- Clone	h2b3	5.728	322.226	42.913	1075.954	9.225
Ctrl MO N-C	Non Clone- Clone	h2b3	5.728	240.883	32.494	1156.587	9.225
Ctrl MO N-C	Non Clone- Clone
Ctrl MO N-C	Non Clone- Clone	h2b4	7.241	324.699	49.173	955.74	11.685
Ctrl MO N-C	Non Clone- Clone	h2b4	7.241	315.78	30.623	1130.64	11.685
Ctrl MO N-C	Non Clone- Clone	h2b4	7.241	304.949	61.816	855.413	11.685
Ctrl MO N-C	Non Clone- Clone	h2b4	7.241	333.648	67.374	1219.927	11.685
Ctrl MO N-C	Non Clone- Clone	h2b4	7.241	359.489	37.927	1928.682	11.685
Ctrl MO N-C	Non Clone- Clone	h2b4	7.241	316.097	18.758	1351.419	11.685
Ctrl MO N-C	Non Clone- Clone
Ctrl MO N-C	Non Clone- Clone	h2b5	10.158	293.712	6.74	1212.02	16.43
Ctrl MO N-C	Non Clone- Clone	h2b5	10.158	353.427	46.173	1209.506	16.43
Ctrl MO N-C	Non Clone- Clone	h2b5	10.158	358.309	21.091	1212.419	16.43
Ctrl MO N-C	Non Clone- Clone	h2b5	10.158	345.752	38.519	1177.617	16.43
Ctrl MO N-C	Non Clone- Clone	h2b5	10.158	311.68	31.609	1093.618	16.43
Ctrl MO N-C	Non Clone- Clone	h2b5	10.158	248.212	6.131	1198.095	16.43
Ctrl MO N-C	Non Clone- Clone	h2b5	10.158	178.371	8.01	1011.938	16.43
Ctrl MO N-C	Non Clone- Clone
Ctrl MO N-C	Non Clone- Clone	h2b6	9.294	390.379	31.472	1237.685	15.024
Ctrl MO N-C	Non Clone- Clone	h2b6	9.294	569.383	90.818	1800.323	15.024
Ctrl MO N-C	Non Clone- Clone	h2b6	9.294	625.256	62.123	2533.173	15.024
Ctrl MO N-C	Non Clone- Clone	h2b6	9.294	524.561	113.238	1877.038	15.024
Ctrl MO N-C	Non Clone- Clone	h2b6	9.294	451.825	50.502	1614.057	15.024
Ctrl MO N-C	Non Clone- Clone	h2b6	9.294	471.286	108.777	1720.154	15.024
Ctrl MO N-C	Non Clone- Clone	h2b6	9.294	543.14	106.845	1814.928	15.024
Ctrl MO N-C	Non Clone- Clone
Ctrl MO N-C	Non Clone- Clone	h2b7	7.673	229.851	1.332	718.082	12.388
Ctrl MO N-C	Non Clone- Clone	h2b7	7.673	429.007	1.469	1688.674	12.388
Ctrl MO N-C	Non Clone- Clone	h2b7	7.673	612.616	1.17	2198.561	12.388
Ctrl MO N-C	Non Clone- Clone	h2b7	7.673	567.633	13.37	2196.496	12.388
Ctrl MO N-C	Non Clone- Clone	h2b7	7.673	496.174	26.001	2508.408	12.388
Ctrl MO N-C	Non Clone- Clone	h2b7	7.673	407.851	33.758	2445.82	12.388
Ctrl MO N-C	Non Clone- Clone	h3b1	11.671	447.198	73.341	1435.769	18.889
Ctrl MO N-C	Non Clone- Clone	h3b1	11.671	530.815	58.145	2060.545	18.889
Ctrl MO N-C	Non Clone- Clone	h3b1	11.671	564.594	118.087	3214.951	18.889
Ctrl MO N-C	Non Clone- Clone	h3b1	11.671	586.234	141.179	1638.834	18.889
Ctrl MO N-C	Non Clone- Clone	h3b1	11.671	460.386	107.032	3135.22	18.889
Ctrl MO N-C	Non Clone- Clone	h3b1	11.671	373.755	76.199	1903.706	18.889
Ctrl MO N-C	Non Clone- Clone
Ctrl MO N-C	Non Clone- Clone	h3b2	10.537	411.911	86.242	1165.471	17.045
Ctrl MO N-C	Non Clone- Clone	h3b2	10.537	612.726	126.131	1880.606	17.045
Ctrl MO N-C	Non Clone- Clone	h3b2	10.537	763.748	172.1	2070.374	17.045
Ctrl MO N-C	Non Clone- Clone	h3b2	10.537	868.07	222.904	2379.151	17.045
Ctrl MO N-C	Non Clone- Clone	h3b2	10.537	739.559	126.073	2338.144	17.045
Ctrl MO N-C	Non Clone- Clone	h3b2	10.537	447.188	92.443	2459.21	17.045
Ctrl MO N-C	Non Clone- Clone
Ctrl MO N-C	Non Clone- Clone	h3b3	12.374	414.539	51.778	1180.754	20.028
Ctrl MO N-C	Non Clone- Clone	h3b3	12.374	600.921	34.173	2361.421	20.028
Ctrl MO N-C	Non Clone- Clone	h3b3	12.374	718.908	28.798	2877.48	20.028
Ctrl MO N-C	Non Clone- Clone	h3b3	12.374	736.422	78.354	2658.48	20.028
Ctrl MO N-C	Non Clone- Clone	h3b3	12.374	584.446	96.605	2284.691	20.028
Ctrl MO N-C	Non Clone- Clone	h3b3	12.374	419.858	52.905	2559.755	20.028
Ctrl MO N-C	Non Clone- Clone
Ctrl MO N-C	Non Clone- Clone	h3b4	8.051	286.601	10.761	1296.177	13.003
Ctrl MO N-C	Non Clone- Clone	h3b4	8.051	369.757	18.787	1517.688	13.003
Ctrl MO N-C	Non Clone- Clone	h3b4	8.051	424.076	61.277	1269.69	13.003
Ctrl MO N-C	Non Clone- Clone	h3b4	8.051	448.634	62.649	1277.067	13.003
Ctrl MO N-C	Non Clone- Clone	h3b4	8.051	371.182	50.479	1499.625	13.003
Ctrl MO N-C	Non Clone- Clone
Ctrl MO N-C	Non Clone- Clone	h3b5	17.885	248.244	18.536	1185.739	28.993
Ctrl MO N-C	Non Clone- Clone	h3b5	17.885	331.467	22.09	1540.54	28.993
Ctrl MO N-C	Non Clone- Clone	h3b5	17.885	394.558	29.204	1559.047	28.993
Ctrl MO N-C	Non Clone- Clone	h3b5	17.885	476.291	56.617	2197.855	28.993
Ctrl MO N-C	Non Clone- Clone	h3b5	17.885	503.386	49.155	1953.146	28.993
Ctrl MO N-C	Non Clone- Clone	h3b5	17.885	389.901	21.156	2341.74	28.993
Ctrl MO N-C	Non Clone- Clone
Ctrl MO N-C	Non Clone- Clone	h3b6	15.886	151.435	0	397.117	25.743
Ctrl MO N-C	Non Clone- Clone	h3b6	15.886	231.116	0	697.837	25.743
Ctrl MO N-C	Non Clone- Clone	h3b6	15.886	276.77	0	1222.787	25.743
Ctrl MO N-C	Non Clone- Clone	h3b6	15.886	335.03	0	1577.528	25.743
Ctrl MO N-C	Non Clone- Clone	h3b6	15.886	383.776	0	1418.616	25.743
Ctrl MO N-C	Non Clone- Clone	h3b6	15.886	395.258	0	3113.321	25.743
Ctrl MO N-C	Non Clone- Clone
Ctrl MO N-C	Non Clone- Clone	h3b7	10.483	249.142	30.286	824.13	16.957
Ctrl MO N-C	Non Clone- Clone	h3b7	10.483	306.915	41.143	1094.196	16.957
Ctrl MO N-C	Non Clone- Clone	h3b7	10.483	374.67	54.656	1451.015	16.957
Ctrl MO N-C	Non Clone- Clone	h3b7	10.483	422.114	67.598	1689.526	16.957
Ctrl MO N-C	Non Clone- Clone	h3b7	10.483	387.967	81.669	1140.923	16.957
Ctrl MO N-C	Non Clone- Clone
Ctrl MO N-C	Non Clone- Clone	h3b8	7.565	243.304	37.179	676.253	12.212
Ctrl MO N-C	Non Clone- Clone	h3b8	7.565	377.593	72.253	1033.804	12.212
Ctrl MO N-C	Non Clone- Clone	h3b8	7.565	465.163	100.63	1239.959	12.212
Ctrl MO N-C	Non Clone- Clone	h3b8	7.565	604.962	145.144	1637.342	12.212
Ctrl MO N-C	Non Clone- Clone	h3b8	7.565	591.563	132.393	2011.23	12.212
Ctrl MO N-C	Non Clone- Clone	h3b8	7.565	486.641	59.609	3095.45	12.212
Ctrl MO N-C	Non Clone- Clone
Ctrl MO N-C	Non Clone- Clone	h3b9	12.482	443.916	48.164	1522.983	20.208
Ctrl MO N-C	Non Clone- Clone	h3b9	12.482	528.514	36.558	1912.42	20.208
Ctrl MO N-C	Non Clone- Clone	h3b9	12.482	582.285	105.76	2491.106	20.208
Ctrl MO N-C	Non Clone- Clone	h3b9	12.482	604.074	90.415	1956.276	20.208
Ctrl MO N-C	Non Clone- Clone	h3b9	12.482	477.357	74.187	3973.205	20.208
Ctrl MO N-C	Non Clone- Clone
Ctrl MO N-C	Non Clone- Clone	h3b10	10.05	236.112	12.447	1271.985	16.254
Ctrl MO N-C	Non Clone- Clone	h3b10	10.05	338.083	27.294	1713.107	16.254
Ctrl MO N-C	Non Clone- Clone	h3b10	10.05	483.272	71.228	1561.345	16.254
Ctrl MO N-C	Non Clone- Clone	h3b10	10.05	488.342	125.471	1683.084	16.254
Ctrl MO N-C	Non Clone- Clone	h3b10	10.05	349.966	62.236	1451.741	16.254
Ctrl MO N-C	Non Clone- Clone
Ctrl MO N-C	Non Clone- Clone	h3b11	17.939	229.396	14.983	752.349	29.081
Ctrl MO N-C	Non Clone- Clone	h3b11	17.939	355.98	28.869	1511.469	29.081
Ctrl MO N-C	Non Clone- Clone	h3b11	17.939	406.866	19.3	2082.267	29.081
Ctrl MO N-C	Non Clone- Clone	h3b11	17.939	405.454	15.985	2566.475	29.081
Ctrl MO N-C	Non Clone- Clone
Ctrl MO N-C	Non Clone- Clone	h3b12	20.155	259.241	13.49	1245.936	32.683
Ctrl MO N-C	Non Clone- Clone	h3b12	20.155	339.178	33.805	1434.535	32.683
Ctrl MO N-C	Non Clone- Clone	h3b12	20.155	414.465	29.556	2009.084	32.683
Ctrl MO N-C	Non Clone- Clone	h3b12	20.155	446.451	43.021	1816.429	32.683
Ctrl MO N-C	Non Clone- Clone	h3b12	20.155	420.651	64.014	2419.11	32.683
Ctrl MO N-C	Non Clone- Clone	h3b12	20.155	371.206	6.678	2518.239	32.683
Ctrl MO N-C	Non Clone- Clone
Ctrl MO N-C	Non Clone- Clone	h3b13	7.835	276.024	22.159	1200.52	12.652
Ctrl MO N-C	Non Clone- Clone	h3b13	7.835	357.079	16.488	1602.599	12.652
Ctrl MO N-C	Non Clone- Clone	h3b13	7.835	444.326	70.421	2904.03	12.652
Ctrl MO N-C	Non Clone- Clone	h3b13	7.835	339.689	55.401	1469.753	12.652
Ctrl MO N-C	Non Clone- Clone
Ctrl MO N-C	Non Clone- Clone	h3b14	11.833	218.745	13.058	723.611	19.153
Ctrl MO N-C	Non Clone- Clone	h3b14	11.833	299.189	22.808	1072.63	19.153
Ctrl MO N-C	Non Clone- Clone	h3b14	11.833	330.388	32.217	1467.273	19.153
Ctrl MO N-C	Non Clone- Clone	h3b14	11.833	363.731	33.854	1419.318	19.153
Ctrl MO N-C	Non Clone- Clone	h3b14	11.833	343.19	44.703	1653.211	19.153
Ctrl MO N-C	Non Clone- Clone
Ctrl MO N-C	Non Clone- Clone	h3b15	6.052	348.022	85.211	1160.91	9.752
Ctrl MO N-C	Non Clone- Clone	h3b15	6.052	415.863	98.22	1462.418	9.752
Ctrl MO N-C	Non Clone- Clone	h3b15	6.052	470.228	99.703	1170.276	9.752
Ctrl MO N-C	Non Clone- Clone	h3b15	6.052	429.012	84.258	1278.275	9.752
Ctrl MO N-C	Non Clone- Clone	h3b15	6.052	319.579	48.661	1433.738	9.752
Ctrl MO N-C	Non Clone- Clone
Ctrl MO N-C	Non Clone- Clone	h3b16	6.052	206.55	33.027	677.292	9.752
Ctrl MO N-C	Non Clone- Clone	h3b16	6.052	314.626	82.022	793.96	9.752
Ctrl MO N-C	Non Clone- Clone	h3b16	6.052	431.404	80.626	990.794	9.752
Ctrl MO N-C	Non Clone- Clone	h3b16	6.052	632.131	28.94	2068.435	9.752
Ctrl MO N-C	Non Clone- Clone	h3b16	6.052	654.536	50.438	3359.627	9.752
Ctrl MO N-C	Non Clone- Clone	h3b16	6.052	430.572	23.3	2450.97	9.752
Ctrl MO N-C	Non Clone- Clone	h3b16	7.078	788.343	139.061	3766.683	11.422
Ctrl MO N-C	Non Clone- Clone
Ctrl MO N-C	Non Clone- Clone	h4b2	5.566	504.011	63.706	1228.268	8.962
Ctrl MO N-C	Non Clone- Clone	h4b2	5.566	1190.221	264.141	2500.947	8.962
Ctrl MO N-C	Non Clone- Clone	h4b2	5.566	1405.949	379.775	2922.405	8.962
Ctrl MO N-C	Non Clone- Clone	h4b2	5.566	1335.602	360.846	3209.192	8.962
Ctrl MO N-C	Non Clone- Clone	h4b2	5.566	1014.693	275.611	2631.869	8.962
Ctrl MO N-C	Non Clone- Clone	h4b2	5.566	722.627	247.124	2342.229	8.962
Ctrl MO N-C	Non Clone- Clone	h4b2	6.268	2447.83	400.355	4095	10.104
Ctrl MO N-C	Non Clone- Clone	h4b2	6.268	2360.103	448.541	4095	10.104
Ctrl MO N-C	Non Clone- Clone	h4b2	6.268	1945.994	393.293	4095	10.104
Ctrl MO N-C	Non Clone- Clone	h4b2	6.268	1406.791	363.136	4095	10.104
Ctrl MO N-C	Non Clone- Clone	h4b2	6.268	702.806	175.423	2176.62	10.104
Ctrl MO N-C	Non Clone- Clone
Ctrl MO N-C	Non Clone- Clone	h4b3	4.755	445.245	123.804	1107.976	7.644
Ctrl MO N-C	Non Clone- Clone	h4b3	4.755	888.184	172.298	2166.699	7.644
Ctrl MO N-C	Non Clone- Clone	h4b3	4.755	1187.106	245.073	3141.81	7.644
Ctrl MO N-C	Non Clone- Clone	h4b3	4.755	1352.756	399.834	2944.917	7.644
Ctrl MO N-C	Non Clone- Clone	h4b3	4.755	1426.09	455.052	3246.354	7.644
Ctrl MO N-C	Non Clone- Clone	h4b3	4.755	1250.812	390.223	3599.975	7.644
Ctrl MO N-C	Non Clone- Clone	h4b3	4.755	1093.044	233.066	3020.199	7.644
Ctrl MO N-C	Non Clone- Clone	h4b3	5.511	1780.853	251.587	4083.144	8.874
Ctrl MO N-C	Non Clone- Clone	h4b3	5.511	1640.679	264.907	4095	8.874
Ctrl MO N-C	Non Clone- Clone	h4b3	5.511	1428.316	308.829	4095	8.874
Ctrl MO N-C	Non Clone- Clone	h4b3	5.511	1196.265	263.466	4075.589	8.874
Ctrl MO N-C	Non Clone- Clone	h4b3	5.511	898.467	149.216	3899.001	8.874
Ctrl MO N-C	Non Clone- Clone
Ctrl MO N-C	Non Clone- Clone	h4b4	12.968	523.521	101.342	1199.682	20.998
Ctrl MO N-C	Non Clone- Clone	h4b4	12.968	1006.27	85.613	2577.516	20.998
Ctrl MO N-C	Non Clone- Clone	h4b4	12.968	1219.265	188.327	3294.528	20.998
Ctrl MO N-C	Non Clone- Clone	h4b4	12.968	1302.194	169.61	3330.329	20.998
Ctrl MO N-C	Non Clone- Clone	h4b4	12.968	1382.506	136.92	3592.61	20.998
Ctrl MO N-C	Non Clone- Clone	h4b4	12.968	1382.793	119.117	4095	20.998
Ctrl MO N-C	Non Clone- Clone	h4b4	12.968	1227.883	211.918	4095	20.998
Ctrl MO N-C	Non Clone- Clone	h4b4	12.968	1062.406	223.916	4086.326	20.998
Ctrl MO N-C	Non Clone- Clone
Ctrl MO N-C	Non Clone- Clone	h4b5	6.538	495.744	62.859	1383.968	10.543
Ctrl MO N-C	Non Clone- Clone	h4b5	6.538	857.025	83.623	3066.97	10.543
Ctrl MO N-C	Non Clone- Clone	h4b5	6.538	889.438	96.074	3341.542	10.543
Ctrl MO N-C	Non Clone- Clone	h4b5	6.538	805.722	95.713	2688.031	10.543
Ctrl MO N-C	Non Clone- Clone	h4b5	6.538	627.69	65.311	2595.253	10.543
Ctrl MO N-C	Non Clone- Clone	h4b5	7.619	1320.389	340.489	4095	12.3
Ctrl MO N-C	Non Clone- Clone	h4b5	7.619	1616.012	305.66	4095	12.3
Ctrl MO N-C	Non Clone- Clone	h4b5	7.619	1526.605	218.959	4095	12.3
Ctrl MO N-C	Non Clone- Clone	h4b5	7.619	1411.646	100.273	4095	12.3
Ctrl MO N-C	Non Clone- Clone	h4b5	7.619	1268.381	101.257	4095	12.3
Ctrl MO N-C	Non Clone- Clone
Ctrl MO N-C	Non Clone- Clone	h4b6	9.402	611.213	123.124	1578.682	15.2
Ctrl MO N-C	Non Clone- Clone	h4b6	9.402	1035.77	166.93	2857.372	15.2
Ctrl MO N-C	Non Clone- Clone	h4b6	9.402	1150.471	106.376	3213.982	15.2
Ctrl MO N-C	Non Clone- Clone	h4b6	9.402	1101.55	146.15	3474.525	15.2
Ctrl MO N-C	Non Clone- Clone	h4b6	9.402	1021.03	106.671	3514.803	15.2
Ctrl MO N-C	Non Clone- Clone	h4b6	9.186	1746.059	197.59	4095	14.848
Ctrl MO N-C	Non Clone- Clone	h4b6	9.186	1061.87	142.118	3944.587	14.848
Ctrl MO N-C	Non Clone- Clone	h4b6	9.186	758.793	103.408	3274.939	14.848
Ctrl MO N-C	Non Clone- Clone
Ctrl MO N-C	Non Clone- Clone	h4b7	9.618	450.932	70.975	1216.452	15.551
Ctrl MO N-C	Non Clone- Clone	h4b7	9.618	777.514	102.041	2212.078	15.551
Ctrl MO N-C	Non Clone- Clone	h4b7	9.618	847.363	136.248	2361.515	15.551
Ctrl MO N-C	Non Clone- Clone	h4b7	9.618	781.782	137.397	2459.223	15.551
Ctrl MO N-C	Non Clone- Clone	h4b7	9.51	1030.808	178.667	3216.345	15.375
Ctrl MO N-C	Non Clone- Clone	h4b7	9.51	1378.574	135.594	3610.647	15.375
Ctrl MO N-C	Non Clone- Clone	h4b7	9.51	1087.334	124.602	3831.471	15.375
Ctrl MO N-C	Non Clone- Clone	h4b7	9.51	888.342	113.527	3095.733	15.375
Ctrl MO N-C	Non Clone- Clone
Ctrl MO N-C	Non Clone- Clone	h4b8	9.726	238.843	36.366	645.477	15.727
Ctrl MO N-C	Non Clone- Clone	h4b8	9.726	389.862	82.556	1130.838	15.727
Ctrl MO N-C	Non Clone- Clone	h4b8	9.726	536.01	106.39	1659.101	15.727
Ctrl MO N-C	Non Clone- Clone	h4b8	9.726	606.466	125.844	2266.969	15.727
Ctrl MO N-C	Non Clone- Clone	h4b8	9.726	653.085	97.822	2158.567	15.727
Ctrl MO N-C	Non Clone- Clone	h4b8	9.726	749.979	179.682	2734.578	15.727
Ctrl MO N-C	Non Clone- Clone	h4b8	9.726	915.578	205.871	4095	15.727
Ctrl MO N-C	Non Clone- Clone	h4b8	9.726	854.14	107.141	3384.058	15.727
Ctrl MO N-C	Non Clone- Clone	h4b8	9.726	765.213	105.832	3630.359	15.727
Ctrl MO N-C	Non Clone- Clone
Ctrl MO N-C	Non Clone- Clone	h4b9	7.241	378.426	44.526	1410.61	11.685
Ctrl MO N-C	Non Clone- Clone	h4b9	7.241	631.2	52.408	3222.715	11.685
Ctrl MO N-C	Non Clone- Clone	h4b9	7.241	671.095	49.96	3441.054	11.685
Ctrl MO N-C	Non Clone- Clone	h4b9	7.241	646.427	60.128	2726.651	11.685
Ctrl MO N-C	Non Clone- Clone	h4b9	7.241	564.458	83.515	2619.044	11.685
Ctrl MO N-C	Non Clone- Clone	h4b9	6.916	923.668	170.333	3558.016	11.158
Ctrl MO N-C	Non Clone- Clone	h4b9	6.916	1441.87	178.293	4021.815	11.158
Ctrl MO N-C	Non Clone- Clone	h4b9	6.916	1467.454	176.646	4095	11.158
Ctrl MO N-C	Non Clone- Clone	h4b9	6.916	1386.341	220.609	4095	11.158
Ctrl MO N-C	Non Clone- Clone	h4b9	6.916	1249.175	141.324	4095	11.158
Ctrl MO N-C	Non Clone- Clone
Ctrl MO N-C	Non Clone- Clone	h4b10	7.781	276.443	10.74	847.961	12.564
Ctrl MO N-C	Non Clone- Clone	h4b10	7.781	459.759	39.559	1478.664	12.564
Ctrl MO N-C	Non Clone- Clone	h4b10	7.781	659.985	67.428	2898.44	12.564
Ctrl MO N-C	Non Clone- Clone	h4b10	7.835	1404.634	268.046	3600.919	12.652
Ctrl MO N-C	Non Clone- Clone	h4b10	7.835	1510.448	290.763	3828.461	12.652
Ctrl MO N-C	Non Clone- Clone	h4b10	7.835	1580.322	378.596	3658.667	12.652
Ctrl MO N-C	Non Clone- Clone	h4b10	7.835	1617.519	358.272	3722.328	12.652
Ctrl MO N-C	Non Clone- Clone	h4b10	7.835	1392.816	357.447	4030.939	12.652
Ctrl MO N-C	Non Clone- Clone	h4b10	7.835	1177.721	283.947	3576.085	12.652
Ctrl MO N-C	Non Clone- Clone
Ctrl MO N-C	Non Clone- Clone	h4b11	3.782	313.77	49.358	740.215	6.062
Ctrl MO N-C	Non Clone- Clone	h4b11	3.782	588.464	102.58	1610.727	6.062
Ctrl MO N-C	Non Clone- Clone	h4b11	3.782	1012.807	234.96	2872.254	6.062
Ctrl MO N-C	Non Clone- Clone	h4b11	3.782	1090.044	142.063	2957.84	6.062
Ctrl MO N-C	Non Clone- Clone	h4b11	3.782	1039.427	185.166	2779.666	6.062
Ctrl MO N-C	Non Clone- Clone	h4b11	3.782	1002.708	130.298	2585.511	6.062
Ctrl MO N-C	Non Clone- Clone	h4b11	3.782	1102.119	169.631	2949.567	6.062
Ctrl MO N-C	Non Clone- Clone	h4b11	3.782	1078.118	169.272	3786.167	6.062
Ctrl MO N-C	Non Clone- Clone	h4b11	3.782	929.295	147.746	3552.469	6.062
Ctrl MO N-C	Non Clone- Clone
Ctrl MO N-C	Non Clone- Clone	h4b12	10.537	452.213	73.771	1361.359	17.045
Ctrl MO N-C	Non Clone- Clone	h4b12	10.537	794.49	101.672	2629.757	17.045
Ctrl MO N-C	Non Clone- Clone	h4b12	10.537	989.876	142.986	3304.93	17.045
Ctrl MO N-C	Non Clone- Clone	h4b12	10.537	1096.691	144.791	3271.079	17.045
Ctrl MO N-C	Non Clone- Clone	h4b12	10.537	1225.386	275.909	3596.91	17.045
Ctrl MO N-C	Non Clone- Clone	h4b12	10.537	1447.772	242.575	3958.775	17.045
Ctrl MO N-C	Non Clone- Clone	h4b12	10.537	1532.758	225.886	4094.613	17.045
Ctrl MO N-C	Non Clone- Clone	h4b12	10.537	1402.255	247.399	4081.45	17.045
Ctrl MO N-C	Non Clone- Clone	h4b12	10.537	1182.934	233.107	4093.103	17.045
Ctrl MO N-C	Non Clone- Clone	h4b12	10.537	932.075	173.475	3396.494	17.045
Ctrl MO N-C	Non Clone- Clone	h4b12	10.537	631.009	36.845	2900.12	17.045
Ctrl MO N-C	Non Clone- Clone
Ctrl MO N-C	Non Clone- Clone	h4b13	8.483	419.757	30.04	1495.383	13.706
Ctrl MO N-C	Non Clone- Clone	h4b13	8.483	618.814	53.559	2209.821	13.706
Ctrl MO N-C	Non Clone- Clone	h4b13	8.483	669.881	56.732	2660.946	13.706
Ctrl MO N-C	Non Clone- Clone	h4b13	8.483	717.521	54.511	2906.982	13.706
Ctrl MO N-C	Non Clone- Clone	h4b13	8.483	851.314	86.769	3247.074	13.706
Ctrl MO N-C	Non Clone- Clone	h4b13	8.483	1069.717	140.754	3595.649	13.706
Ctrl MO N-C	Non Clone- Clone	h4b13	8.483	987.75	189.845	3872.531	13.706
Ctrl MO N-C	Non Clone- Clone	h4b13	8.483	821.933	190.236	3311.6	13.706
Ctrl MO N-C	Non Clone- Clone
Ctrl MO N-C	Non Clone- Clone	h4b14	11.617	568.273	86.657	1529.013	18.797
Ctrl MO N-C	Non Clone- Clone	h4b14	11.617	1145.815	137.558	3025.7	18.797
Ctrl MO N-C	Non Clone- Clone	h4b14	11.617	1417.404	155.196	3691.352	18.797
Ctrl MO N-C	Non Clone- Clone	h4b14	11.617	1552.938	253.292	3908.947	18.797
Ctrl MO N-C	Non Clone- Clone	h4b14	11.617	1663.938	343.229	3986.477	18.797
Ctrl MO N-C	Non Clone- Clone	h4b14	11.617	1681.049	283.298	3924.094	18.797
Ctrl MO N-C	Non Clone- Clone	h4b14	11.617	1425.525	190.617	4095	18.797
Ctrl MO N-C	Non Clone- Clone	h4b14	11.617	1304.869	263.366	4095	18.797
Ctrl MO N-C	Non Clone- Clone
Ctrl MO N-C	Non Clone- Clone	h4b15	10.212	789.867	137.389	2257.495	16.517
Ctrl MO N-C	Non Clone- Clone	h4b15	10.212	1069.918	146.178	2540.711	16.517
Ctrl MO N-C	Non Clone- Clone	h4b15	10.212	1155.114	151.143	2863.505	16.517
Ctrl MO N-C	Non Clone- Clone	h4b15	10.212	1204.553	109.54	3308.476	16.517
Ctrl MO N-C	Non Clone- Clone	h4b15	10.212	1232.477	220.468	3979.283	16.517
Ctrl MO N-C	Non Clone- Clone	h4b15	10.212	1351.795	161.056	3859.227	16.517
Ctrl MO N-C	Non Clone- Clone	h4b15	10.212	1390.903	157.502	3503.638	16.517
Ctrl MO N-C	Non Clone- Clone	h4b15	10.212	1413.051	188.1	3583.29	16.517
Ctrl MO N-C	Non Clone- Clone	h4b15	10.212	1248	163.329	4074.243	16.517
Ctrl MO N-C	Non Clone- Clone
Ctrl MO N-C	Non Clone- Clone	h4b16	8.267	658.54	63.863	2282.012	13.355
Ctrl MO N-C	Non Clone- Clone	h4b16	8.267	788.74	76.958	2765.248	13.355
Ctrl MO N-C	Non Clone- Clone	h4b16	8.267	764.456	86.807	2517.232	13.355
Ctrl MO N-C	Non Clone- Clone	h4b16	8.267	702.765	92.271	3356.468	13.355
Ctrl MO N-C	Non Clone- Clone	h4b16	8.591	1299.527	155.078	3835.332	13.882
Ctrl MO N-C	Non Clone- Clone	h4b16	8.591	1479.261	205.559	4089.729	13.882
Ctrl MO N-C	Non Clone- Clone	h4b16	8.591	1543.601	211.333	3971.28	13.882
Ctrl MO N-C	Non Clone- Clone	h4b16	8.591	1543.601	211.333	3971.28	13.882
Ctrl MO N-C	Non Clone- Clone	h4b16	8.591	1671.028	252.072	4051.628	13.882
Ctrl MO N-C	Non Clone- Clone	h4b16	8.591	1633.254	166.624	4083.776	13.882
Ctrl MO N-C	Non Clone- Clone	h4b16	8.591	1234.116	179.115	4031.553	13.882
Ctrl MO N-C	Non Clone- Clone	h4b16	8.591	891.91	102.816	3893.828	13.882
Ctrl MO N-N	Non Clone- Non Clone	h1b1	10.807	376.032	20.034	1051.469	17.484
Ctrl MO N-N	Non Clone- Non Clone	h1b1	10.807	463.067	18.47	1667.246	17.484
Ctrl MO N-N	Non Clone- Non Clone	h1b1	10.807	605.672	37.097	2538.309	17.484
Ctrl MO N-N	Non Clone- Non Clone	h1b1	10.807	747.367	56.111	3130.436	17.484
Ctrl MO N-N	Non Clone- Non Clone	h1b1	10.861	1488.602	108.185	3869.613	17.572
Ctrl MO N-N	Non Clone- Non Clone	h1b1	10.861	1513.24	124.669	3907.465	17.572
Ctrl MO N-N	Non Clone- Non Clone	h1b1	10.861	1445.867	149.645	4056.8	17.572
Ctrl MO N-N	Non Clone- Non Clone	h1b1	10.861	1289.41	235.368	3945.273	17.572
Ctrl MO N-N	Non Clone- Non Clone	h1b1	10.861	904.857	93.405	2837.467	17.572
Ctrl MO N-N	Non Clone- Non Clone	h1b1	10.861	725.726	83.162	3062.593	17.572
Ctrl MO N-N	Non Clone- Non Clone
Ctrl MO N-N	Non Clone- Non Clone	h1b2	3.944	708.333	99.098	2943.226	6.326
Ctrl MO N-N	Non Clone- Non Clone	h1b2	3.944	851.2	102.574	2584.514	6.326
Ctrl MO N-N	Non Clone- Non Clone	h1b2	3.944	1047.591	152.761	3041.686	6.326
Ctrl MO N-N	Non Clone- Non Clone	h1b2	3.944	983.697	141.286	3011.877	6.326
Ctrl MO N-N	Non Clone- Non Clone	h1b2	3.944	788.858	133.55	3289.298	6.326
Ctrl MO N-N	Non Clone- Non Clone	h1b2	3.944	601.75	103.928	2702.441	6.326
Ctrl MO N-N	Non Clone- Non Clone	h1b2	3.944	325.026	49.106	1235.322	6.326
Ctrl MO N-N	Non Clone- Non Clone
Ctrl MO N-N	Non Clone- Non Clone	h1b3	9.402	517.008	33.3	2035.96	15.2
Ctrl MO N-N	Non Clone- Non Clone	h1b3	9.402	750.172	83.787	2488.123	15.2
Ctrl MO N-N	Non Clone- Non Clone	h1b3	9.402	1090.809	131.626	3033.949	15.2
Ctrl MO N-N	Non Clone- Non Clone	h1b3	9.402	1285.001	160.526	3272.225	15.2
Ctrl MO N-N	Non Clone- Non Clone	h1b3	9.402	1215.257	215.174	3687.315	15.2
Ctrl MO N-N	Non Clone- Non Clone	h1b3	9.402	1071.801	217.83	3497.866	15.2
Ctrl MO N-N	Non Clone- Non Clone	h1b3	9.402	982.383	256.121	2919.032	15.2
Ctrl MO N-N	Non Clone- Non Clone
Ctrl MO N-N	Non Clone- Non Clone	h1b4	10.212	381.793	53.774	974.34	16.517
Ctrl MO N-N	Non Clone- Non Clone	h1b4	10.212	489.281	98.168	1368.432	16.517
Ctrl MO N-N	Non Clone- Non Clone	h1b4	10.212	711.898	125.91	1949.315	16.517
Ctrl MO N-N	Non Clone- Non Clone	h1b4	10.212	1029.381	95.39	2912.682	16.517
Ctrl MO N-N	Non Clone- Non Clone	h1b4	10.212	1219.319	191.391	3545.125	16.517
Ctrl MO N-N	Non Clone- Non Clone	h1b4	10.212	1126.28	192.195	3324.555	16.517
Ctrl MO N-N	Non Clone- Non Clone	h1b4	10.212	975.806	195.819	3225.474	16.517
Ctrl MO N-N	Non Clone- Non Clone	h1b4	10.212	857.747	142.341	3927.211	16.517
Ctrl MO N-N	Non Clone- Non Clone	h1b4	10.212	726.93	128.738	3251.73	16.517
Ctrl MO N-N	Non Clone- Non Clone
Ctrl MO N-N	Non Clone- Non Clone	h1b5	11.509	367.969	19.645	988.547	18.626
Ctrl MO N-N	Non Clone- Non Clone	h1b5	11.509	449.525	55.666	1384.086	18.626
Ctrl MO N-N	Non Clone- Non Clone	h1b5	11.509	577.671	50.085	2997.073	18.626
Ctrl MO N-N	Non Clone- Non Clone	h1b5	11.509	709.706	27.151	3337.038	18.626
Ctrl MO N-N	Non Clone- Non Clone	h1b5	11.509	703.647	38.277	2880.007	18.626
Ctrl MO N-N	Non Clone- Non Clone	h1b5	11.131	1157.225	177.61	3397.448	18.011
Ctrl MO N-N	Non Clone- Non Clone	h1b5	11.131	979.994	210.861	3279.813	18.011
Ctrl MO N-N	Non Clone- Non Clone	h1b5	11.131	700.727	139.493	2385.402	18.011
Ctrl MO N-N	Non Clone- Non Clone	h1b5	11.131	413.097	42.403	1660.675	18.011
Ctrl MO N-N	Non Clone- Non Clone
Ctrl MO N-N	Non Clone- Non Clone	h1b6	12.59	275.067	17.488	1154.219	20.383
Ctrl MO N-N	Non Clone- Non Clone	h1b6	12.59	258.233	11.798	1195.017	20.383
Ctrl MO N-N	Non Clone- Non Clone	h1b6	12.59	298.74	27.898	1301.004	20.383
Ctrl MO N-N	Non Clone- Non Clone	h1b6	12.59	398.171	17.846	3158.297	20.383
Ctrl MO N-N	Non Clone- Non Clone	h1b6	12.59	356.976	7.594	2117.1	20.383
Ctrl MO N-N	Non Clone- Non Clone	h1b6	12.59	299.153	11.005	2181.603	20.383
Ctrl MO N-N	Non Clone- Non Clone
Ctrl MO N-N	Non Clone- Non Clone	h2b1	9.078	201.069	15.407	594.742	14.672
Ctrl MO N-N	Non Clone- Non Clone	h2b1	9.078	311.747	19.353	913.132	14.672
Ctrl MO N-N	Non Clone- Non Clone	h2b1	9.078	377.441	37.31	1174.943	14.672
Ctrl MO N-N	Non Clone- Non Clone	h2b1	9.078	381.186	33.403	1143.757	14.672
Ctrl MO N-N	Non Clone- Non Clone	h2b1	9.078	369.681	45.785	1261.632	14.672
Ctrl MO N-N	Non Clone- Non Clone	h2b1	9.078	360.919	41.74	1219.219	14.672
Ctrl MO N-N	Non Clone- Non Clone	h2b1	9.078	316.805	42.109	1103.562	14.672
Ctrl MO N-N	Non Clone- Non Clone
Ctrl MO N-N	Non Clone- Non Clone	h2b2	6.43	298.254	28.116	911.391	10.367
Ctrl MO N-N	Non Clone- Non Clone	h2b2	6.43	375.694	50.288	1344.088	10.367
Ctrl MO N-N	Non Clone- Non Clone	h2b2	6.43	382.823	48.569	1252.155	10.367
Ctrl MO N-N	Non Clone- Non Clone	h2b2	6.43	378.698	88.743	1531.864	10.367
Ctrl MO N-N	Non Clone- Non Clone	h2b2	6.43	378.361	78.438	1246.22	10.367
Ctrl MO N-N	Non Clone- Non Clone	h2b2	6.43	399.929	80.119	989.826	10.367
Ctrl MO N-N	Non Clone- Non Clone
Ctrl MO N-N	Non Clone- Non Clone	h2b3	9.618	249.334	3.845	838.4	15.551
Ctrl MO N-N	Non Clone- Non Clone	h2b3	9.618	324.528	19.698	992.969	15.551
Ctrl MO N-N	Non Clone- Non Clone	h2b3	9.618	427.427	31.917	1501.967	15.551
Ctrl MO N-N	Non Clone- Non Clone	h2b3	9.618	456.349	37.855	1495.134	15.551
Ctrl MO N-N	Non Clone- Non Clone	h2b3	9.618	470.778	86.187	1466.813	15.551
Ctrl MO N-N	Non Clone- Non Clone	h2b3	9.618	479.642	107.11	1134.824	15.551
Ctrl MO N-N	Non Clone- Non Clone	h2b3	9.618	457.049	82.753	2635.7	15.551
Ctrl MO N-N	Non Clone- Non Clone	h2b3	9.618	379.27	61.64	1966.318	15.551
Ctrl MO N-N	Non Clone- Non Clone
Ctrl MO N-N	Non Clone- Non Clone	h2b4	7.457	100.152	0.555	381.379	12.037
Ctrl MO N-N	Non Clone- Non Clone	h2b4	7.457	169.593	11.028	533.884	12.037
Ctrl MO N-N	Non Clone- Non Clone	h2b4	7.457	238.754	11.633	847.52	12.037
Ctrl MO N-N	Non Clone- Non Clone	h2b4	7.457	313.724	27.483	2036.749	12.037
Ctrl MO N-N	Non Clone- Non Clone	h2b4	7.457	334.367	13.248	1637.272	12.037
Ctrl MO N-N	Non Clone- Non Clone	h2b4	7.457	379.996	20.925	1760.175	12.037
Ctrl MO N-N	Non Clone- Non Clone	h2b4	7.457	431.174	19.569	1767.442	12.037
Ctrl MO N-N	Non Clone- Non Clone	h2b4	7.457	381.626	26.841	1786.252	12.037
Ctrl MO N-N	Non Clone- Non Clone
Ctrl MO N-N	Non Clone- Non Clone	h2b5	12.536	93.897	0.405	315.918	20.295
Ctrl MO N-N	Non Clone- Non Clone	h2b5	12.536	179.619	4.989	739.207	20.295
Ctrl MO N-N	Non Clone- Non Clone	h2b5	12.536	249.902	6.611	813.513	20.295
Ctrl MO N-N	Non Clone- Non Clone	h2b5	12.536	326.154	8.687	1870.651	20.295
Ctrl MO N-N	Non Clone- Non Clone	h2b5	12.536	352.777	24.666	2132.554	20.295
Ctrl MO N-N	Non Clone- Non Clone	h2b5	12.536	377.57	33.91	1753.061	20.295
Ctrl MO N-N	Non Clone- Non Clone	h2b5	12.536	381.574	44.381	1436.324	20.295
Ctrl MO N-N	Non Clone- Non Clone	h2b5	12.536	307.492	40.979	1429.892	20.295
Ctrl MO N-N	Non Clone- Non Clone	h2b5	12.536	215.467	14.012	1386.625	20.295
Ctrl MO N-N	Non Clone- Non Clone
Ctrl MO N-N	Non Clone- Non Clone
Ctrl MO N-N	Non Clone- Non Clone
Ctrl MO N-N	Non Clone- Non Clone
Ctrl MO N-N	Non Clone- Non Clone
Ctrl MO N-N	Non Clone- Non Clone
Ctrl MO N-N	Non Clone- Non Clone
Ctrl MO N-N	Non Clone- Non Clone
Ctrl MO N-N	Non Clone- Non Clone
Ctrl MO N-N	Non Clone- Non Clone	h3b1	11.833	394.169	33.938	1252.95	19.153
Ctrl MO N-N	Non Clone- Non Clone	h3b1	11.833	506.102	50.17	1718.68	19.153
Ctrl MO N-N	Non Clone- Non Clone	h3b1	11.833	669.468	79.583	2852.595	19.153
Ctrl MO N-N	Non Clone- Non Clone	h3b1	11.833	694.429	49.342	2921.49	19.153
Ctrl MO N-N	Non Clone- Non Clone	h3b1	11.833	467.507	63.543	1653.495	19.153
Ctrl MO N-N	Non Clone- Non Clone
Ctrl MO N-N	Non Clone- Non Clone	h3b2	9.672	412.3	29.04	1777.973	15.639
Ctrl MO N-N	Non Clone- Non Clone	h3b2	9.672	624.918	82.808	3000.42	15.639
Ctrl MO N-N	Non Clone- Non Clone	h3b2	9.672	766.242	108.276	2820.521	15.639
Ctrl MO N-N	Non Clone- Non Clone	h3b2	9.672	767.804	155.728	2772.875	15.639
Ctrl MO N-N	Non Clone- Non Clone	h3b2	9.672	652.021	102.835	2500.753	15.639
Ctrl MO N-N	Non Clone- Non Clone
Ctrl MO N-N	Non Clone- Non Clone	h3b3	7.673	372.964	18.275	1299.403	12.388
Ctrl MO N-N	Non Clone- Non Clone	h3b3	7.673	578.304	99.253	1887.301	12.388
Ctrl MO N-N	Non Clone- Non Clone	h3b3	7.673	738.68	127.625	2780.708	12.388
Ctrl MO N-N	Non Clone- Non Clone	h3b3	7.673	781.238	167.817	2626.453	12.388
Ctrl MO N-N	Non Clone- Non Clone	h3b3	7.673	493.231	115.287	1585.481	12.388
Ctrl MO N-N	Non Clone- Non Clone	h3b3	7.673	295.825	64.542	1726.128	12.388
Ctrl MO N-N	Non Clone- Non Clone
Ctrl MO N-N	Non Clone- Non Clone	h4b2	10.591	729.681	23.89	2628.258	17.132
Ctrl MO N-N	Non Clone- Non Clone	h4b2	10.591	866.659	31.649	3211.94	17.132
Ctrl MO N-N	Non Clone- Non Clone	h4b2	10.591	879.425	44.765	3392.386	17.132
Ctrl MO N-N	Non Clone- Non Clone	h4b2	10.591	838.811	15.627	3378.713	17.132
Ctrl MO N-N	Non Clone- Non Clone	h4b2	10.591	773.661	44.936	3374.064	17.132
Ctrl MO N-N	Non Clone- Non Clone	h4b2	10.591	808.735	50.645	3924.111	17.132
Ctrl MO N-N	Non Clone- Non Clone	h4b2	10.591	812.272	58.496	3888.988	17.132
Ctrl MO N-N	Non Clone- Non Clone	h4b2	10.591	765.336	69.285	3970.095	17.132
Ctrl MO N-N	Non Clone- Non Clone	h4b2	10.591	624.695	51.582	3359.184	17.132
Ctrl MO N-N	Non Clone- Non Clone	h4b2	10.591	464.453	61.848	3061.75	17.132
Ctrl MO N-N	Non Clone- Non Clone	h4b2	10.591	420.65	30.193	3294.319	17.132
Ctrl MO N-N	Non Clone- Non Clone
Ctrl MO N-N	Non Clone- Non Clone	h4b3	7.133	585.425	102.839	1705.938	11.509
Ctrl MO N-N	Non Clone- Non Clone	h4b3	7.133	784.895	91.792	2483.435	11.509
Ctrl MO N-N	Non Clone- Non Clone	h4b3	7.133	861.321	119.842	2915.488	11.509
Ctrl MO N-N	Non Clone- Non Clone	h4b3	7.133	919.981	102.124	2902.295	11.509
Ctrl MO N-N	Non Clone- Non Clone	h4b3	7.133	925.949	60.26	2850.863	11.509
Ctrl MO N-N	Non Clone- Non Clone	h4b3	7.133	873.322	101.156	3000.567	11.509
Ctrl MO N-N	Non Clone- Non Clone	h4b3	7.133	812.23	84.21	3003.583	11.509
Ctrl MO N-N	Non Clone- Non Clone	h4b3	7.403	1122.784	210.226	3418.872	11.949
Ctrl MO N-N	Non Clone- Non Clone	h4b3	7.403	826.247	127.909	3569.309	11.949
Ctrl MO N-N	Non Clone- Non Clone	h4b3	7.403	473.209	91.734	2701.242	11.949
Ctrl MO N-N	Non Clone- Non Clone
Ctrl MO N-N	Non Clone- Non Clone	h4b4	7.133	676.396	104.082	3095.291	11.493
Ctrl MO N-N	Non Clone- Non Clone	h4b4	7.133	757.565	62.562	3947.779	11.493
Ctrl MO N-N	Non Clone- Non Clone	h4b4	7.133	760.686	89.189	4007.396	11.493
Ctrl MO N-N	Non Clone- Non Clone	h4b4	7.457	1348.002	198.478	3667.94	12.019
Ctrl MO N-N	Non Clone- Non Clone	h4b4	7.457	1402.938	294.011	3806.973	12.019
Ctrl MO N-N	Non Clone- Non Clone	h4b4	7.457	1307.125	249.572	3691.001	12.019
Ctrl MO N-N	Non Clone- Non Clone	h4b4	7.457	1195.639	228.801	3316.424	12.019
Ctrl MO N-N	Non Clone- Non Clone	h4b4	7.457	998.647	132.066	3288.048	12.019
Ctrl MO N-N	Non Clone- Non Clone	h4b4	7.457	766.742	126.72	2906.32	12.019
Ctrl MO N-N	Non Clone- Non Clone
Ctrl MO N-N	Non Clone- Non Clone	h4b5	9.294	885.297	109.227	3000.086	15.024
Ctrl MO N-N	Non Clone- Non Clone	h4b5	9.294	1003.529	111.515	3614.661	15.024
Ctrl MO N-N	Non Clone- Non Clone	h4b5	9.294	1010.286	116.551	2911.933	15.024
Ctrl MO N-N	Non Clone- Non Clone	h4b5	9.294	914.944	163.613	2657.245	15.024
Ctrl MO N-N	Non Clone- Non Clone	h4b5	9.294	809.159	95.162	3406.572	15.024
Ctrl MO N-N	Non Clone- Non Clone	h4b5	9.51	1554.268	310.204	4095	15.375
Ctrl MO N-N	Non Clone- Non Clone	h4b5	9.51	1478.047	241.212	4095	15.375
Ctrl MO N-N	Non Clone- Non Clone	h4b5	9.51	1254.972	171.508	4095	15.375
Ctrl MO N-N	Non Clone- Non Clone	h4b5	9.51	902.969	109.61	3350.832	15.375
Ctrl MO N-N	Non Clone- Non Clone
Ctrl MO N-N	Non Clone- Non Clone	h4b6	12.32	431.698	70.992	1618.737	19.944
Ctrl MO N-N	Non Clone- Non Clone	h4b6	12.32	636.213	92.007	1951.334	19.944
Ctrl MO N-N	Non Clone- Non Clone	h4b6	12.32	670.402	109.181	2028.508	19.944
Ctrl MO N-N	Non Clone- Non Clone	h4b6	12.32	657.326	116.286	2117.849	19.944
Ctrl MO N-N	Non Clone- Non Clone	h4b6	12.32	614.052	125.263	1928.091	19.944
Ctrl MO N-N	Non Clone- Non Clone	h4b6	12.32	548.504	92.934	2193.679	19.944
Ctrl MO N-N	Non Clone- Non Clone	h4b6	12.32	528.181	103.015	2655.042	19.944
Ctrl MO N-N	Non Clone- Non Clone	h4b6	12.32	530.291	73.164	2534.29	19.944
Ctrl MO N-N	Non Clone- Non Clone
Ctrl MO N-N	Non Clone- Non Clone	h4b7	10.104	292.629	34.15	966.976	16.342
Ctrl MO N-N	Non Clone- Non Clone	h4b7	10.104	491.711	32.713	1621.419	16.342
Ctrl MO N-N	Non Clone- Non Clone	h4b7	10.104	713.436	98.529	1827.492	16.342
Ctrl MO N-N	Non Clone- Non Clone	h4b7	10.104	741.578	95.138	2539.196	16.342
Ctrl MO N-N	Non Clone- Non Clone	h4b7	10.104	702.614	110.246	2821.177	16.342
Ctrl MO N-N	Non Clone- Non Clone	h4b7	10.104	686.714	129.027	3860.214	16.342
Ctrl MO N-N	Non Clone- Non Clone	h4b7	9.402	1222.869	212.892	2962.507	15.199
Ctrl MO N-N	Non Clone- Non Clone	h4b7	9.402	1162.461	234.337	3811.603	15.199
Ctrl MO N-N	Non Clone- Non Clone	h4b7	9.402	948.775	207.694	3346.353	15.199
Ctrl MO N-N	Non Clone- Non Clone	h4b7	9.402	711.474	123.565	2529.99	15.199
Ctrl MO N-N	Non Clone- Non Clone
Ctrl MO N-N	Non Clone- Non Clone	h4b8	9.726	653.006	11.089	2654.667	15.726
Ctrl MO N-N	Non Clone- Non Clone	h4b8	9.726	613.243	65.426	2288.637	15.726
Ctrl MO N-N	Non Clone- Non Clone	h4b8	9.726	561.803	84.05	2213.618	15.726
Ctrl MO N-N	Non Clone- Non Clone	h4b8	9.726	554.118	67.132	2310.734	15.726
Ctrl MO N-N	Non Clone- Non Clone	h4b8	9.726	586.295	62.048	2696.71	15.726
Ctrl MO N-N	Non Clone- Non Clone	h4b8	9.726	550.756	22.388	2530.534	15.726
Ctrl MO N-N	Non Clone- Non Clone	h4b8	9.726	527.918	33.616	2494.668	15.726
Ecad MO C-C	Clone- Clone	h1b1	9.348	233.242	22.892	716.597	15.112
Ecad MO C-C	Clone- Clone	h1b1	9.348	448.5	65.262	1462.358	15.112
Ecad MO C-C	Clone- Clone	h1b1	9.348	840.497	165.458	1871.234	15.112
Ecad MO C-C	Clone- Clone	h1b1	9.348	1139.215	201.903	3683.067	15.112
Ecad MO C-C	Clone- Clone	h1b1	9.348	1348.048	322.583	4061.518	15.112
Ecad MO C-C	Clone- Clone	h1b1	9.348	1348.21	228.867	4095	15.112
Ecad MO C-C	Clone- Clone	h1b1	9.348	929.306	146.798	4095	15.112
Ecad MO C-C	Clone- Clone
Ecad MO C-C	Clone- Clone	h1b2	6.43	477.49	130.671	1127.293	10.367
Ecad MO C-C	Clone- Clone	h1b2	6.43	753.84	142.872	2173.33	10.367
Ecad MO C-C	Clone- Clone	h1b2	6.43	777.546	217.157	2873.85	10.367
Ecad MO C-C	Clone- Clone	h1b2	6.862	1330.325	271.844	4081.921	11.07
Ecad MO C-C	Clone- Clone	h1b2	6.862	1237.153	219.323	4069.636	11.07
Ecad MO C-C	Clone- Clone	h1b2	6.862	889.792	124.5	3037.648	11.07
Ecad MO C-C	Clone- Clone	h1b2	6.862	561.937	55.129	1434.144	11.07
Ecad MO C-C	Clone- Clone
Ecad MO C-C	Clone- Clone	h1b3	7.619	458.775	107.503	968.513	12.3
Ecad MO C-C	Clone- Clone	h1b3	7.619	975.277	161.191	3715.987	12.3
Ecad MO C-C	Clone- Clone	h1b3	7.619	1757.415	151.172	4095	12.3
Ecad MO C-C	Clone- Clone	h1b3	7.619	1658.205	183.195	4095	12.3
Ecad MO C-C	Clone- Clone	h1b3	7.619	1405.395	121.399	4095	12.3
Ecad MO C-C	Clone- Clone	h1b3	7.619	1099.453	111.173	3943.643	12.3
Ecad MO C-C	Clone- Clone
Ecad MO C-C	Clone- Clone	h1b4	4.053	281.298	35.063	958.949	6.502
Ecad MO C-C	Clone- Clone	h1b4	4.053	495.714	88.632	1692.974	6.502
Ecad MO C-C	Clone- Clone	h1b4	4.053	925.533	166.591	3853.878	6.502
Ecad MO C-C	Clone- Clone	h1b4	4.053	993.903	181.481	3209.289	6.502
Ecad MO C-C	Clone- Clone	h1b4	4.863	1484.263	177.577	3862.825	7.819
Ecad MO C-C	Clone- Clone	h1b4	4.863	1644.44	301.943	3718.447	7.819
Ecad MO C-C	Clone- Clone	h1b4	4.863	1308.038	201.329	3850.916	7.819
Ecad MO C-C	Clone- Clone	h1b4	4.863	965.023	137.191	2745.885	7.819
Ecad MO C-C	Clone- Clone
Ecad MO C-C	Clone- Clone	h1b5	6.97	660.011	80.573	2060.906	11.246
Ecad MO C-C	Clone- Clone	h1b5	6.97	1030.686	161.926	3012.832	11.246
Ecad MO C-C	Clone- Clone	h1b5	6.97	990.493	138.757	2722.033	11.246
Ecad MO C-C	Clone- Clone	h1b5	6.808	1520.313	153.816	4095	10.982
Ecad MO C-C	Clone- Clone	h1b5	6.808	1190.002	183.62	3434.344	10.982
Ecad MO C-C	Clone- Clone	h1b5	6.808	845.375	155.848	2864.119	10.982
Ecad MO C-C	Clone- Clone	h1b5	6.808	647.024	152.701	3988.533	10.982
Ecad MO C-C	Clone- Clone
Ecad MO C-C	Clone- Clone	h1b6	5.403	704.644	42.854	2358.3	8.698
Ecad MO C-C	Clone- Clone	h1b6	5.403	1120.007	72.204	3772.384	8.698
Ecad MO C-C	Clone- Clone	h1b6	5.403	1194.314	102.609	3616.274	8.698
Ecad MO C-C	Clone- Clone	h1b6	5.295	1406.788	237.806	3639.782	8.522
Ecad MO C-C	Clone- Clone	h1b6	5.295	1465.619	259.001	4083.756	8.522
Ecad MO C-C	Clone- Clone	h1b6	5.295	1539.396	273.718	4093.434	8.522
Ecad MO C-C	Clone- Clone	h1b6	5.295	1325.328	243.445	4095	8.522
Ecad MO C-C	Clone- Clone	h1b6	5.295	1179.593	211.437	4094.383	8.522
Ecad MO C-C	Clone- Clone
Ecad MO C-C	Clone- Clone	h2b1	21.019	269.966	4.055	1016.199	34.089
Ecad MO C-C	Clone- Clone	h2b1	21.019	352.332	5.615	1125.146	34.089
Ecad MO C-C	Clone- Clone	h2b1	21.019	551.27	16.526	1548.653	34.089
Ecad MO C-C	Clone- Clone	h2b1	21.019	776.118	38.172	2588.86	34.089
Ecad MO C-C	Clone- Clone	h2b1	21.938	955.919	73.76	2822.288	35.583
Ecad MO C-C	Clone- Clone	h2b1	21.938	958.373	98.275	4014.154	35.583
Ecad MO C-C	Clone- Clone	h2b1	21.938	928.294	98.737	4093.832	35.583
Ecad MO C-C	Clone- Clone	h2b1	21.938	875.68	94.108	4041.403	35.583
Ecad MO C-C	Clone- Clone	h2b1	21.938	736.886	46.075	3925.086	35.583
Ecad MO C-C	Clone- Clone
Ecad MO C-C	Clone- Clone	h2b2	19.182	217.286	8.167	858.353	31.102
Ecad MO C-C	Clone- Clone	h2b2	19.182	280.594	21.997	753.013	31.102
Ecad MO C-C	Clone- Clone	h2b2	19.182	415.247	37.287	1126.047	31.102
Ecad MO C-C	Clone- Clone	h2b2	19.182	551.769	60.519	1778.169	31.102
Ecad MO C-C	Clone- Clone	h2b2	19.182	615.709	79.595	2928.571	31.102
Ecad MO C-C	Clone- Clone	h2b2	19.182	604.431	43.727	3610.419	31.102
Ecad MO C-C	Clone- Clone	h2b2	19.182	577.86	80.341	3840.855	31.102
Ecad MO C-C	Clone- Clone	h2b2	19.182	572.557	61.82	3155.032	31.102
Ecad MO C-C	Clone- Clone	h2b2	19.182	545.462	29.127	3542.262	31.102
Ecad MO C-C	Clone- Clone
Ecad MO C-C	Clone- Clone	h2b3	14.697	208.627	3.107	1214.481	23.81
Ecad MO C-C	Clone- Clone	h2b3	14.697	271.54	33.062	1469.061	23.81
Ecad MO C-C	Clone- Clone	h2b3	14.697	345.658	46.552	1513.427	23.81
Ecad MO C-C	Clone- Clone	h2b3	14.697	364.817	42.992	1632.394	23.81
Ecad MO C-C	Clone- Clone	h2b3	14.697	357.832	30.637	2140.562	23.81
Ecad MO C-C	Clone- Clone	h2b3	14.697	347.126	34.407	2340.307	23.81
Ecad MO C-C	Clone- Clone
Ecad MO C-C	Clone- Clone	h2b4	22.64	450.649	53.053	1407.463	36.725
Ecad MO C-C	Clone- Clone	h2b4	22.64	635.161	114.267	2295.553	36.725
Ecad MO C-C	Clone- Clone	h2b4	22.64	831.776	105.953	2755.287	36.725
Ecad MO C-C	Clone- Clone	h2b4	22.64	882.372	100.499	2463.746	36.725
Ecad MO C-C	Clone- Clone	h2b4	22.316	1029.781	147.253	2880.636	36.198
Ecad MO C-C	Clone- Clone	h2b4	22.316	1001.285	160.976	3614.291	36.198
Ecad MO C-C	Clone- Clone	h2b4	22.316	937.285	134.947	3670.079	36.198
Ecad MO C-C	Clone- Clone
Ecad MO C-C	Clone- Clone	h2b5	19.614	639.81	59.503	2027.143	31.805
Ecad MO C-C	Clone- Clone	h2b5	19.614	801.541	64.386	2885.866	31.805
Ecad MO C-C	Clone- Clone	h2b5	19.614	838.304	87.58	3382.871	31.805
Ecad MO C-C	Clone- Clone	h2b5	19.614	880.979	82.582	2902.651	31.805
Ecad MO C-C	Clone- Clone	h2b5	19.614	876.832	90.3	3989.871	31.805
Ecad MO C-C	Clone- Clone	h2b5	19.614	752.641	13.244	4095	31.805
Ecad MO C-C	Clone- Clone
Ecad MO C-C	Clone- Clone	h2b6	3.134	392.718	88.75	849.517	5.008
Ecad MO C-C	Clone- Clone	h2b6	3.134	582.419	135.175	1227.24	5.008
Ecad MO C-C	Clone- Clone	h2b6	3.134	952.09	139.75	2612.674	5.008
Ecad MO C-C	Clone- Clone	h2b6	3.134	1070.826	196.289	2823.308	5.008
Ecad MO C-C	Clone- Clone	h2b6	3.134	1143.274	129.525	2787.034	5.008
Ecad MO C-C	Clone- Clone	h2b6	3.134	1067.263	130.362	3199.517	5.008
Ecad MO C-C	Clone- Clone	h2b6	3.134	899.246	93.299	2867.829	5.008
Ecad MO C-C	Clone- Clone
Ecad MO C-C	Clone- Clone	h2b7	8.159	422.876	78.173	1385.607	13.179
Ecad MO C-C	Clone- Clone	h2b7	8.159	686.763	131.777	2145.241	13.179
Ecad MO C-C	Clone- Clone	h2b7	8.159	1140.091	173.674	3807.323	13.179
Ecad MO C-C	Clone- Clone	h2b7	8.159	1213.047	182.589	4058.676	13.179
Ecad MO C-C	Clone- Clone	h2b7	8.159	1175.305	123.94	4095	13.179
Ecad MO C-C	Clone- Clone	h2b7	8.159	949.279	140.358	3971.734	13.179
Ecad MO C-C	Clone- Clone	h2b7	8.159	643.503	49.554	2627.562	13.179
Ecad MO C-C	Clone- Clone
Ecad MO C-C	Clone- Clone	h2b8	5.187	311.62	48.312	910.26	8.347
Ecad MO C-C	Clone- Clone	h2b8	5.187	452.4	75.582	1825.151	8.347
Ecad MO C-C	Clone- Clone	h2b8	5.187	485.843	65.289	1802.839	8.347
Ecad MO C-C	Clone- Clone	h2b8	5.187	513.604	72.056	2612.894	8.347
Ecad MO C-C	Clone- Clone	h2b8	5.187	467.039	31.01	2973.965	8.347
Ecad MO C-C	Clone- Clone
Ecad MO C-C	Clone- Clone	h2b9	6.322	457.908	108.467	1402.768	10.192
Ecad MO C-C	Clone- Clone	h2b9	6.322	735.507	112.468	2345.33	10.192
Ecad MO C-C	Clone- Clone	h2b9	6.322	1030.99	175.189	2777.661	10.192
Ecad MO C-C	Clone- Clone	h2b9	6.322	1026.512	188.561	3188.037	10.192
Ecad MO C-C	Clone- Clone	h2b9	6.322	938.995	137.713	3285.237	10.192
Ecad MO C-C	Clone- Clone	h2b9	6.322	778.69	63.293	3075.298	10.192
Ecad MO C-C	Clone- Clone
Ecad MO C-C	Clone- Clone	h2b10	5.782	271.461	18.277	767.532	9.312
Ecad MO C-C	Clone- Clone	h2b10	5.782	420.961	67.025	1093.917	9.312
Ecad MO C-C	Clone- Clone	h2b10	5.782	628.646	125.929	1560.261	9.312
Ecad MO C-C	Clone- Clone	h2b10	5.782	838.742	300.259	1864.565	9.312
Ecad MO C-C	Clone- Clone	h2b10	5.782	784.102	236.086	1803.127	9.312
Ecad MO C-C	Clone- Clone	h2b10	5.782	638.33	109.04	1955.431	9.312
Ecad MO C-C	Clone- Clone	h2b10	5.782	463.745	53.598	1546.876	9.312
Ecad MO C-C	Clone- Clone
Ecad MO C-C	Clone- Clone	h2b11	3.35	407.926	78.256	1213.573	5.359
Ecad MO C-C	Clone- Clone	h2b11	3.35	577.185	101.109	1263.741	5.359
Ecad MO C-C	Clone- Clone	h2b11	3.35	751.625	58.209	1985.855	5.359
Ecad MO C-C	Clone- Clone	h2b11	3.35	775.156	128.248	2072.794	5.359
Ecad MO C-C	Clone- Clone	h2b11	3.35	729.401	118.842	1691.655	5.359
Ecad MO C-C	Clone- Clone	h2b11	3.35	658.667	66.867	2862.193	5.359
Ecad MO C-C	Clone- Clone	h2b11	3.35	468.387	75.485	3287.844	5.359
Ecad MO C-C	Clone- Clone	h3b1	6.808	340.547	49.274	981.197	10.982
Ecad MO C-C	Clone- Clone	h3b1	6.808	566.969	79.218	1679.268	10.982
Ecad MO C-C	Clone- Clone	h3b1	6.808	684.263	115.427	2287.167	10.982
Ecad MO C-C	Clone- Clone	h3b1	6.808	813.658	131.455	2553.904	10.982
Ecad MO C-C	Clone- Clone	h3b1	6.808	721.993	132.762	2691.828	10.982
Ecad MO C-C	Clone- Clone	h3b1	6.808	470.581	42.224	3762.808	10.982
Ecad MO C-C	Clone- Clone
Ecad MO C-C	Clone- Clone	h3b2	13.941	499.518	62.983	2077.624	22.58
Ecad MO C-C	Clone- Clone	h3b2	13.941	637.798	51.347	2235.938	22.58
Ecad MO C-C	Clone- Clone	h3b2	13.941	850.442	94.063	2484.184	22.58
Ecad MO C-C	Clone- Clone	h3b2	13.941	947.119	148.311	2571.426	22.58
Ecad MO C-C	Clone- Clone	h3b2	13.941	896.754	136.574	3453.107	22.58
Ecad MO C-C	Clone- Clone	h3b2	13.941	846.753	158.417	3475.427	22.58
Ecad MO C-C	Clone- Clone
Ecad MO C-C	Clone- Clone	h3b3	12.86	555.533	92.128	2202.801	20.822
Ecad MO C-C	Clone- Clone	h3b3	12.86	679.578	122.822	2183.207	20.822
Ecad MO C-C	Clone- Clone	h3b3	12.86	854.351	112.985	2952.945	20.822
Ecad MO C-C	Clone- Clone	h3b3	12.86	870.456	53.261	3272.499	20.822
Ecad MO C-C	Clone- Clone	h3b3	12.86	530.087	56.137	3102.925	20.822
Ecad MO C-C	Clone- Clone	h3b3	12.86	429.432	24.235	3110.107	20.822
Ecad MO C-C	Clone- Clone
Ecad MO C-C	Clone- Clone	h3b4	8.105	388.948	29.327	1228.88	13.091
Ecad MO C-C	Clone- Clone	h3b4	8.105	623.965	81.216	1783.875	13.091
Ecad MO C-C	Clone- Clone	h3b4	8.105	814.912	135.653	2376.907	13.091
Ecad MO C-C	Clone- Clone	h3b4	8.105	878.506	239.872	2665.916	13.091
Ecad MO C-C	Clone- Clone	h3b4	8.105	752.642	193.521	1879.53	13.091
Ecad MO C-C	Clone- Clone	h3b4	8.105	562.164	118.444	1806.151	13.091
Ecad MO C-C	Clone- Clone	h3b4	8.105	529.608	73.219	2706.509	13.091
Ecad MO C-C	Clone- Clone
Ecad MO C-C	Clone- Clone	h3b5	6.754	676.291	133.205	2091.46	10.894
Ecad MO C-C	Clone- Clone	h3b5	6.754	802.098	84.676	2291.69	10.894
Ecad MO C-C	Clone- Clone	h3b5	6.754	853.07	208.957	2248.11	10.894
Ecad MO C-C	Clone- Clone	h3b5	6.754	773.642	139.405	1788.786	10.894
Ecad MO C-C	Clone- Clone	h3b5	6.754	492.667	107.097	1500.284	10.894
Ecad MO C-C	Clone- Clone	h3b5	6.754	381.849	58.622	1225.731	10.894
Ecad MO C-C	Clone- Clone
Ecad MO C-C	Clone- Clone	h4b1	8.537	436.264	73.942	1016.729	13.794
Ecad MO C-C	Clone- Clone	h4b1	8.537	699.891	162.806	1539.953	13.794
Ecad MO C-C	Clone- Clone	h4b1	8.537	840.442	202.968	2051.906	13.794
Ecad MO C-C	Clone- Clone	h4b1	8.537	939.087	201.063	2224.619	13.794
Ecad MO C-C	Clone- Clone	h4b1	8.537	818.271	149.438	2972.956	13.794
Ecad MO C-C	Clone- Clone	h4b1	8.537	687.259	158.825	3247.83	13.794
Ecad MO C-C	Clone- Clone	h4b1	8.537	668.823	148.499	3442.366	13.794
Ecad MO C-C	Clone- Clone	h4b1	8.537	684.295	76.077	3367.57	13.794
Ecad MO C-C	Clone- Clone
Ecad MO C-C	Clone- Clone	h4b2	8.375	826.236	172.757	2014.88	13.53
Ecad MO C-C	Clone- Clone	h4b2	8.375	1320.283	157.482	3036.688	13.53
Ecad MO C-C	Clone- Clone	h4b2	8.375	1532.69	248.454	3486.705	13.53
Ecad MO C-C	Clone- Clone	h4b2	8.375	1700.298	113.427	3976.909	13.53
Ecad MO C-C	Clone- Clone	h4b2	8.375	1550.099	192.974	4083.919	13.53
Ecad MO C-C	Clone- Clone	h4b2	8.429	1801.696	498.977	4076.899	13.618
Ecad MO C-C	Clone- Clone	h4b2	8.429	1800.614	378.047	4095	13.618
Ecad MO C-C	Clone- Clone	h4b2	8.429	1387.511	300.014	4095	13.618
Ecad MO C-C	Clone- Clone	h4b2	8.429	1086.826	343.572	4072.786	13.618
Ecad MO C-C	Clone- Clone
Ecad MO C-C	Clone- Clone	h4b3	12.914	1222.963	284.984	3116.088	20.91
Ecad MO C-C	Clone- Clone	h4b3	12.914	1464.118	292.308	3815.011	20.91
Ecad MO C-C	Clone- Clone	h4b3	12.914	1393.069	138.933	3419.873	20.91
Ecad MO C-C	Clone- Clone	h4b3	12.914	1106.917	221.09	3012.166	20.91
Ecad MO C-C	Clone- Clone	h4b3	12.914	880.11	215.83	2939.952	20.91
Ecad MO C-C	Clone- Clone	h4b3	12.914	787.771	172.681	2214.248	20.91
Ecad MO C-C	Clone- Clone	h4b3	12.914	774.438	172.919	2797.117	20.91
Ecad MO C-C	Clone- Clone
Ecad MO C-C	Clone- Clone	h4b4	9.402	630.418	71.76	1951.849	15.2
Ecad MO C-C	Clone- Clone	h4b4	9.402	681.861	113.818	2724.181	15.2
Ecad MO C-C	Clone- Clone	h4b4	9.402	643.798	86.42	2577.682	15.2
Ecad MO C-C	Clone- Clone	h4b4	9.402	598.923	121.79	3394.204	15.2
Ecad MO C-C	Clone- Clone	h4b4	9.402	606.17	188.514	3686.253	15.2
Ecad MO C-C	Clone- Clone	h4b4	9.51	2070.076	267.168	4095	15.375
Ecad MO C-C	Clone- Clone	h4b4	9.51	2199.054	249.588	4095	15.375
Ecad MO C-C	Clone- Clone	h4b4	9.51	2160.816	241.442	4095	15.375
Ecad MO C-C	Clone- Clone	h4b4	9.51	1894.52	136.617	4095	15.375
Ecad MO C-C	Clone- Clone
Ecad MO C-C	Clone- Clone	h4b5	11.185	365.998	16.461	1050.718	18.099
Ecad MO C-C	Clone- Clone	h4b5	11.185	761.757	32.445	2679.25	18.099
Ecad MO C-C	Clone- Clone	h4b5	11.185	924.817	49.703	3174.768	18.099
Ecad MO C-C	Clone- Clone	h4b5	11.509	1241.351	84.015	3424.703	18.626
Ecad MO C-C	Clone- Clone	h4b5	11.509	1194.169	154.721	4082.265	18.626
Ecad MO C-C	Clone- Clone	h4b5	11.509	1101.131	172.816	4095	18.626
Ecad MO C-C	Clone- Clone	h4b5	11.509	1040.538	83.207	3982.111	18.626
Ecad MO C-C	Clone- Clone	h4b5	11.509	623.355	39.006	3289.458	18.626
Ecad MO C-C	Clone- Clone
Ecad MO C-C	Clone- Clone	h4b6	7.997	908.731	137.744	3148.225	12.915
Ecad MO C-C	Clone- Clone	h4b6	7.997	1046.196	116.429	3725.802	12.915
Ecad MO C-C	Clone- Clone	h4b6	7.997	1167.202	186.455	4051.228	12.915
Ecad MO C-C	Clone- Clone	h4b6	7.997	1144.303	273.604	4005.874	12.915
Ecad MO C-C	Clone- Clone	h4b6	7.997	1028.239	195.455	3479.892	12.915
Ecad MO C-C	Clone- Clone	h4b6	7.997	931.596	163.08	3027.938	12.915
Ecad MO C-C	Clone- Clone	h4b6	7.997	794.553	102.966	2884.768	12.915
Ecad MO C-C	Clone- Clone	h4b6	7.997	611.745	91.984	3336.377	12.915
Ecad MO C-C	Clone- Clone
Ecad MO N-C	Non Clone- Clone	h1b1	12.752	678.524	83.117	1909.135	20.647
Ecad MO N-C	Non Clone- Clone	h1b1	12.752	992.306	155.892	2833.472	20.647
Ecad MO N-C	Non Clone- Clone	h1b1	12.752	963.57	210.576	3469.282	20.647
Ecad MO N-C	Non Clone- Clone	h1b1	12.752	968.869	173.645	3573.968	20.647
Ecad MO N-C	Non Clone- Clone	h1b1	12.752	936.392	98.669	3669.383	20.647
Ecad MO N-C	Non Clone- Clone	h1b1	12.752	660.447	40.98	3826.638	20.647
Ecad MO N-C	Non Clone- Clone
Ecad MO N-C	Non Clone- Clone	h1b2	8.645	712.194	116.589	1965.022	13.969
Ecad MO N-C	Non Clone- Clone	h1b2	8.645	961.433	188.607	3118.032	13.969
Ecad MO N-C	Non Clone- Clone	h1b2	8.645	896.532	230.656	3104.369	13.969
Ecad MO N-C	Non Clone- Clone	h1b2	8.267	1236.488	282.259	4095	13.354
Ecad MO N-C	Non Clone- Clone	h1b2	8.267	869.129	149.956	4095	13.354
Ecad MO N-C	Non Clone- Clone
Ecad MO N-C	Non Clone- Clone	h1b3	17.507	575.36	17.541	2433.703	28.378
Ecad MO N-C	Non Clone- Clone	h1b3	17.507	781.222	72.581	3611.905	28.378
Ecad MO N-C	Non Clone- Clone	h1b3	16.372	1028.356	136.351	2981.786	26.533
Ecad MO N-C	Non Clone- Clone	h1b3	16.372	1063.2	214.742	3780.708	26.533
Ecad MO N-C	Non Clone- Clone	h1b3	16.372	957.046	187.722	4093.252	26.533
Ecad MO N-C	Non Clone- Clone	h1b3	16.372	656.893	80.154	4094.958	26.533
Ecad MO N-C	Non Clone- Clone
Ecad MO N-C	Non Clone- Clone	h1b4	9.51	988.059	52.182	2410.771	15.375
Ecad MO N-C	Non Clone- Clone	h1b4	9.51	1452.865	150.147	3888.495	15.375
Ecad MO N-C	Non Clone- Clone	h1b4	9.51	1622.527	193.244	3935.453	15.375
Ecad MO N-C	Non Clone- Clone	h1b4	9.51	1604.444	245.693	4065.83	15.375
Ecad MO N-C	Non Clone- Clone	h1b4	9.51	1178.072	161.051	3852.992	15.375
Ecad MO N-C	Non Clone- Clone	h1b4	9.51	810.515	60.218	3328.479	15.375
Ecad MO N-C	Non Clone- Clone
Ecad MO N-C	Non Clone- Clone	h1b5	9.132	715.351	48.957	1912.853	14.76
Ecad MO N-C	Non Clone- Clone	h1b5	9.132	1087.032	183.555	4076.218	14.76
Ecad MO N-C	Non Clone- Clone	h1b5	9.132	1269.722	117.738	4095	14.76
Ecad MO N-C	Non Clone- Clone	h1b5	9.834	1559.131	149.819	4095	15.901
Ecad MO N-C	Non Clone- Clone	h1b5	9.834	1205.3	114.378	4095	15.901
Ecad MO N-C	Non Clone- Clone
Ecad MO N-C	Non Clone- Clone	h1b6	9.942	608.949	96.615	1916.55	16.078
Ecad MO N-C	Non Clone- Clone	h1b6	9.942	932.209	135.256	3844.658	16.078
Ecad MO N-C	Non Clone- Clone	h1b6	9.942	1009.863	103.361	4095	16.078
Ecad MO N-C	Non Clone- Clone	h1b6	10.158	1196.928	110.724	4095	16.429
Ecad MO N-C	Non Clone- Clone	h1b6	10.158	1050.742	221.933	4095	16.429
Ecad MO N-C	Non Clone- Clone	h1b6	10.158	663.85	91.028	2815.308	16.429
Ecad MO N-C	Non Clone- Clone
Ecad MO N-C	Non Clone- Clone	h1b7	12.752	601.373	27.013	1717.929	20.646
Ecad MO N-C	Non Clone- Clone	h1b7	12.752	774.787	54.621	2575.824	20.646
Ecad MO N-C	Non Clone- Clone	h1b7	12.158	1095.061	322.75	4056.189	19.68
Ecad MO N-C	Non Clone- Clone	h1b7	12.158	1169.884	185.502	4042.362	19.68
Ecad MO N-C	Non Clone- Clone	h1b7	12.158	883.313	90.477	3638.725	19.68
Ecad MO N-C	Non Clone- Clone
Ecad MO N-C	Non Clone- Clone	h1b8	9.51	442.289	44.041	1244.835	15.375
Ecad MO N-C	Non Clone- Clone	h1b8	9.51	848.024	87.646	3038.85	15.375
Ecad MO N-C	Non Clone- Clone	h1b8	9.51	1184.473	90.506	3872.33	15.375
Ecad MO N-C	Non Clone- Clone	h1b8	9.24	1558.96	268.63	3833.17	14.936
Ecad MO N-C	Non Clone- Clone	h1b8	9.24	1524.405	247.983	4084.151	14.936
Ecad MO N-C	Non Clone- Clone	h1b8	9.24	1112.266	257.072	2987.773	14.936
Ecad MO N-C	Non Clone- Clone	h1b8	9.24	561.047	145.757	1869.994	14.936
Ecad MO N-C	Non Clone- Clone	h1b8	10.753	498.097	119.167	1692.45	17.396
Ecad MO N-C	Non Clone- Clone
Ecad MO N-C	Non Clone- Clone	h1b9	10.753	751.096	91.302	2503.825	17.396
Ecad MO N-C	Non Clone- Clone	h1b9	10.753	588.221	148.647	3010.333	17.396
Ecad MO N-C	Non Clone- Clone	h1b9	9.456	1388.853	361.027	3227.176	15.287
Ecad MO N-C	Non Clone- Clone	h1b9	9.456	1379.3	320.811	4095	15.287
Ecad MO N-C	Non Clone- Clone
Ecad MO N-C	Non Clone- Clone	h1b10	5.349	665.706	152.502	1787.517	8.61
Ecad MO N-C	Non Clone- Clone	h1b10	5.349	1486.926	284.813	4043.334	8.61
Ecad MO N-C	Non Clone- Clone	h1b10	5.349	1826.102	286.15	3916.283	8.61
Ecad MO N-C	Non Clone- Clone	h1b10	5.349	1123.829	283.646	3071.494	8.61
Ecad MO N-C	Non Clone- Clone	h1b10	5.349	836.507	200.952	2884.19	8.61
Ecad MO N-C	Non Clone- Clone
Ecad MO N-C	Non Clone- Clone	h1b11	11.888	556.098	99.267	1512.055	19.241
Ecad MO N-C	Non Clone- Clone	h1b11	11.888	843.539	161.298	2807.271	19.241
Ecad MO N-C	Non Clone- Clone	h1b11	11.888	815.612	154.166	3351.263	19.241
Ecad MO N-C	Non Clone- Clone	h1b11	11.888	794.864	67.234	3968.783	19.241
Ecad MO N-C	Non Clone- Clone
Ecad MO N-C	Non Clone- Clone	h1b12	13.184	539.143	34.525	1733.354	21.35
Ecad MO N-C	Non Clone- Clone	h1b12	13.184	894.688	68.162	3485.555	21.35
Ecad MO N-C	Non Clone- Clone	h1b12	13.184	1167.844	127.812	4046.119	21.35
Ecad MO N-C	Non Clone- Clone	h1b12	12.05	1609.4	178.135	4070.044	19.505
Ecad MO N-C	Non Clone- Clone	h1b12	12.05	1514.907	126.377	4067.684	19.505
Ecad MO N-C	Non Clone- Clone	h1b12	12.05	1103.249	187.714	4030.552	19.505
Ecad MO N-C	Non Clone- Clone
Ecad MO N-C	Non Clone- Clone	h1b13	10.212	918.88	221.625	3204.637	16.517
Ecad MO N-C	Non Clone- Clone	h1b13	10.212	1419.911	332.009	4095	16.517
Ecad MO N-C	Non Clone- Clone	h1b13	10.212	1725.987	298.761	4095	16.517
Ecad MO N-C	Non Clone- Clone	h1b13	8.429	2242.128	409.504	4095	13.618
Ecad MO N-C	Non Clone- Clone	h1b13	8.429	2380.781	423.087	4095	13.618
Ecad MO N-C	Non Clone- Clone	h1b13	8.429	1100.235	243.134	3438.68	13.618
Ecad MO N-C	Non Clone- Clone
Ecad MO N-C	Non Clone- Clone	h1b14	10.807	573.799	32.397	1879.791	17.484
Ecad MO N-C	Non Clone- Clone	h1b14	10.807	784.744	92.938	3246.805	17.484
Ecad MO N-C	Non Clone- Clone	h1b14	11.347	984.992	75.99	4095	18.362
Ecad MO N-C	Non Clone- Clone	h1b14	11.347	1007.143	100.213	4095	18.362
Ecad MO N-C	Non Clone- Clone	h1b14	10.915	1089.199	100.597	4095	17.66
Ecad MO N-C	Non Clone- Clone	h1b14	10.915	1032.236	95.494	4095	17.66
Ecad MO N-C	Non Clone- Clone
Ecad MO N-C	Non Clone- Clone	h1b15	11.996	556.75	31.343	1638.148	19.417
Ecad MO N-C	Non Clone- Clone	h1b15	11.996	912.681	161.919	2383.282	19.417
Ecad MO N-C	Non Clone- Clone	h1b15	11.996	1182.824	161.867	4095	19.417
Ecad MO N-C	Non Clone- Clone	h1b15	11.996	1258.552	221.086	4095	19.417
Ecad MO N-C	Non Clone- Clone	h1b15	11.996	1040.881	159.345	3764.578	19.417
Ecad MO N-C	Non Clone- Clone
Ecad MO N-C	Non Clone- Clone	h1b16	8.862	674.726	75.38	2275.284	14.321
Ecad MO N-C	Non Clone- Clone	h1b16	8.862	819.792	139.133	2563.989	14.321
Ecad MO N-C	Non Clone- Clone	h1b16	10.429	758.619	155.251	2755.741	16.868
Ecad MO N-C	Non Clone- Clone	h1b16	10.429	828.446	194.081	2793.865	16.868
Ecad MO N-C	Non Clone- Clone	h1b16	10.429	852.171	158.139	3350.608	16.868
Ecad MO N-C	Non Clone- Clone
Ecad MO N-C	Non Clone- Clone	h1b17	12.05	339.529	13.137	963.63	19.505
Ecad MO N-C	Non Clone- Clone	h1b17	12.05	666.824	62.22	2040.396	19.505
Ecad MO N-C	Non Clone- Clone	h1b17	12.05	923.232	128.698	2289.323	19.505
Ecad MO N-C	Non Clone- Clone	h1b17	12.05	841.532	125.214	2210.047	19.505
Ecad MO N-C	Non Clone- Clone	h1b17	12.59	958.514	147.415	3823.74	20.383
Ecad MO N-C	Non Clone- Clone	h1b17	12.59	1092.444	137.882	4095	20.383
Ecad MO N-C	Non Clone- Clone	h1b17	12.59	1136.836	160.699	4095	20.383
Ecad MO N-C	Non Clone- Clone
Ecad MO N-C	Non Clone- Clone	h1b18	6.322	727.31	77.27	2010.99	10.192
Ecad MO N-C	Non Clone- Clone	h1b18	6.322	1092.686	150.776	3035.543	10.192
Ecad MO N-C	Non Clone- Clone	h1b18	6.322	964.02	140.576	2903.41	10.192
Ecad MO N-C	Non Clone- Clone	h1b18	6.322	828.619	165.036	3608.682	10.192
Ecad MO N-C	Non Clone- Clone	h1b18	6.322	755.561	201.223	2961.766	10.192
Ecad MO N-C	Non Clone- Clone	h1b18	6.322	776.714	150.409	2844.483	10.192
Ecad MO N-C	Non Clone- Clone
Ecad MO N-C	Non Clone- Clone	h1b19	12.266	833.658	58.984	3623.666	19.856
Ecad MO N-C	Non Clone- Clone	h1b19	12.266	1481.239	117.055	4095	19.856
Ecad MO N-C	Non Clone- Clone	h1b19	12.266	1592.345	160.676	4095	19.856
Ecad MO N-C	Non Clone- Clone	h1b19	12.266	1478.676	193.204	4095	19.856
Ecad MO N-C	Non Clone- Clone	h1b19	12.428	1585.391	229.133	4095	20.119
Ecad MO N-C	Non Clone- Clone	h1b19	12.428	1343.568	143.533	4095	20.119
Ecad MO N-C	Non Clone- Clone	h1b19	12.428	1109.978	71.242	3876.601	20.119
Ecad MO N-C	Non Clone- Clone	h2b1	22.586	669.078	53.362	1918.131	36.637
Ecad MO N-C	Non Clone- Clone	h2b1	22.586	711.651	91.575	3555.857	36.637
Ecad MO N-C	Non Clone- Clone	h2b1	22.586	670.086	80.582	3351.048	36.637
Ecad MO N-C	Non Clone- Clone	h2b1	22.586	603.961	79.727	2497.441	36.637
Ecad MO N-C	Non Clone- Clone	h2b1	22.586	561.306	48.618	3047.022	36.637
Ecad MO N-C	Non Clone- Clone
Ecad MO N-C	Non Clone- Clone	h2b2	8.483	495.293	39.839	1236.984	13.706
Ecad MO N-C	Non Clone- Clone	h2b2	8.483	741.739	57.909	2016.713	13.706
Ecad MO N-C	Non Clone- Clone	h2b2	8.483	970.081	108.512	3188.151	13.706
Ecad MO N-C	Non Clone- Clone	h2b2	8.483	716.283	172.907	2412.479	13.706
Ecad MO N-C	Non Clone- Clone	h2b2	8.483	391.147	48.252	1715.51	13.706
Ecad MO N-C	Non Clone- Clone
Ecad MO N-C	Non Clone- Clone	h2b3	18.966	708.837	40.673	1817.452	30.749
Ecad MO N-C	Non Clone- Clone	h2b3	18.966	764.349	43.539	2228.517	30.749
Ecad MO N-C	Non Clone- Clone	h2b3	18.966	621.646	103.135	3267.652	30.749
Ecad MO N-C	Non Clone- Clone	h2b3	18.966	607.308	118.392	2890.874	30.749
Ecad MO N-C	Non Clone- Clone	h2b3	18.966	620.94	77.467	3292.238	30.749
Ecad MO N-C	Non Clone- Clone	h2b3	18.966	575.326	93.052	2853.976	30.749
Ecad MO N-C	Non Clone- Clone
Ecad MO N-C	Non Clone- Clone	h2b4	15.832	488.893	17.396	1558.144	25.655
Ecad MO N-C	Non Clone- Clone	h2b4	15.832	650.644	40.971	1863.473	25.655
Ecad MO N-C	Non Clone- Clone	h2b4	15.832	711.617	73.458	2972.406	25.655
Ecad MO N-C	Non Clone- Clone	h2b4	15.832	656.123	36.893	2261.111	25.655
Ecad MO N-C	Non Clone- Clone	h2b4	15.832	572.921	31.89	3150.626	25.655
Ecad MO N-C	Non Clone- Clone	h2b4	15.832	481.484	38.563	2708.602	25.655
Ecad MO N-C	Non Clone- Clone
Ecad MO N-C	Non Clone- Clone	h2b5	7.295	403.974	86.582	1072.524	11.773
Ecad MO N-C	Non Clone- Clone	h2b5	7.295	592.878	108.885	1445.989	11.773
Ecad MO N-C	Non Clone- Clone	h2b5	7.295	823.341	108.863	1887.399	11.773
Ecad MO N-C	Non Clone- Clone	h2b5	7.295	1064.427	118.181	2639.09	11.773
Ecad MO N-C	Non Clone- Clone	h2b5	7.295	1024.317	146.968	2578.619	11.773
Ecad MO N-C	Non Clone- Clone	h2b5	7.295	934.316	244.787	2154.597	11.773
Ecad MO N-C	Non Clone- Clone	h2b5	7.295	839.627	204.653	2041.221	11.773
Ecad MO N-C	Non Clone- Clone	h2b5	7.295	725.763	200.517	1770.157	11.773
Ecad MO N-C	Non Clone- Clone
Ecad MO N-C	Non Clone- Clone	h2b6	14.103	736.131	66.603	2022.095	22.843
Ecad MO N-C	Non Clone- Clone	h2b6	14.103	968.305	125.543	2406.347	22.843
Ecad MO N-C	Non Clone- Clone	h2b6	14.103	1060.347	130.832	2503.969	22.843
Ecad MO N-C	Non Clone- Clone	h2b6	14.103	975.858	169.825	2939.854	22.843
Ecad MO N-C	Non Clone- Clone	h2b6	14.103	854.853	177.096	3743.78	22.843
Ecad MO N-C	Non Clone- Clone	h2b6	14.103	731.829	181.408	3691.02	22.843
Ecad MO N-C	Non Clone- Clone	h2b6	14.103	509.012	44.558	3748.048	22.843
Ecad MO N-C	Non Clone- Clone	h3b1	9.402	858.626	33.081	2834.239	15.192
Ecad MO N-C	Non Clone- Clone	h3b1	9.402	964.33	69.55	3057.369	15.192
Ecad MO N-C	Non Clone- Clone	h3b1	9.402	833.93	44.712	3051.62	15.192
Ecad MO N-C	Non Clone- Clone	h3b1	9.402	617.757	66.528	2414.547	15.192
Ecad MO N-C	Non Clone- Clone	h3b1	9.402	559.655	35.94	2670.544	15.192
Ecad MO N-C	Non Clone- Clone
Ecad MO N-C	Non Clone- Clone	h3b2	8.159	390.485	70.9	1065.277	13.179
Ecad MO N-C	Non Clone- Clone	h3b2	8.159	595.415	119.021	1562.814	13.179
Ecad MO N-C	Non Clone- Clone	h3b2	8.159	710.769	109.776	1840.337	13.179
Ecad MO N-C	Non Clone- Clone	h3b2	8.159	782.711	97.114	2129.865	13.179
Ecad MO N-C	Non Clone- Clone	h3b2	8.159	681.407	108.273	2038.66	13.179
Ecad MO N-C	Non Clone- Clone	h3b2	8.159	501.336	61.819	1422.586	13.179
Ecad MO N-C	Non Clone- Clone	h3b2	8.159	457.559	46.729	2027.854	13.179
Ecad MO N-C	Non Clone- Clone	h4b1	5.566	759.649	144.215	1725.3	8.962
Ecad MO N-C	Non Clone- Clone	h4b1	5.566	913.801	228.207	1911.53	8.962
Ecad MO N-C	Non Clone- Clone	h4b1	5.566	979.022	208.047	2359.415	8.962
Ecad MO N-C	Non Clone- Clone	h4b1	5.566	869.154	147.714	2466.029	8.962
Ecad MO N-C	Non Clone- Clone	h4b1	5.566	691.468	201.181	2679.401	8.962
Ecad MO N-C	Non Clone- Clone	h4b1	5.511	1408.596	365.595	3144.431	8.874
Ecad MO N-C	Non Clone- Clone	h4b1	5.511	1211.027	417.337	3123.418	8.874
Ecad MO N-C	Non Clone- Clone	h4b1	5.511	830.299	243.022	2155.017	8.874
Ecad MO N-C	Non Clone- Clone	h4b1	5.511	448.134	100.647	1563.398	8.874
Ecad MO N-C	Non Clone- Clone	h4b1	5.511	298.879	55.123	1370.057	8.874
Ecad MO N-C	Non Clone- Clone
Ecad MO N-C	Non Clone- Clone	h4b2	7.835	436.923	88.662	1367.465	12.652
Ecad MO N-C	Non Clone- Clone	h4b2	7.835	454.664	96.71	1433.259	12.652
Ecad MO N-C	Non Clone- Clone	h4b2	7.835	473.671	106.855	1648.202	12.652
Ecad MO N-C	Non Clone- Clone	h4b2	7.835	507.301	112.537	2775.232	12.652
Ecad MO N-C	Non Clone- Clone	h4b2	9.024	1120.853	232.001	4003.497	14.585
Ecad MO N-C	Non Clone- Clone	h4b2	9.024	1352.917	255.694	3717.329	14.585
Ecad MO N-C	Non Clone- Clone	h4b2	9.024	1537.357	246.259	3871.458	14.585
Ecad MO N-C	Non Clone- Clone	h4b2	9.024	1536.184	299.258	4018.899	14.585
Ecad MO N-C	Non Clone- Clone	h4b2	9.024	1141.601	104.898	3886.102	14.585
Ecad MO N-C	Non Clone- Clone
Ecad MO N-C	Non Clone- Clone	h4b3	9.672	391.496	23.581	839.663	15.639
Ecad MO N-C	Non Clone- Clone	h4b3	9.672	563.379	66.717	1299.398	15.639
Ecad MO N-C	Non Clone- Clone	h4b3	9.672	622.547	55.616	1806.279	15.639
Ecad MO N-C	Non Clone- Clone	h4b3	9.672	620.938	99.685	1869.311	15.639
Ecad MO N-C	Non Clone- Clone	h4b3	9.078	1046.982	356.708	2061.515	14.672
Ecad MO N-C	Non Clone- Clone	h4b3	9.078	1046.634	147.712	2749.519	14.672
Ecad MO N-C	Non Clone- Clone	h4b3	9.078	906.153	162.731	3073.016	14.672
Ecad MO N-C	Non Clone- Clone	h4b3	8.862	1187.248	234.357	4004.597	14.321
Ecad MO N-C	Non Clone- Clone	h4b3	8.862	1267.866	222.588	4095	14.321
Ecad MO N-C	Non Clone- Clone	h4b3	8.862	1249.923	160.732	4095	14.321
Ecad MO N-C	Non Clone- Clone	h4b3	8.862	1051.903	90.42	4037.496	14.321
Ecad MO N-C	Non Clone- Clone	h4b3	8.862	883.569	55.509	2888.619	14.321
Ecad MO N-C	Non Clone- Clone	h4b3	8.862	798.641	77.721	3320.346	14.321
Ecad MO N-C	Non Clone- Clone
Ecad MO N-C	Non Clone- Clone	h4b4	9.672	813.114	124.838	1883.05	15.639
Ecad MO N-C	Non Clone- Clone	h4b4	9.672	1162.433	149.557	2679.006	15.639
Ecad MO N-C	Non Clone- Clone	h4b4	9.672	1297.97	280.724	3426.748	15.639
Ecad MO N-C	Non Clone- Clone	h4b4	9.672	1432.742	315.418	3710.579	15.639
Ecad MO N-C	Non Clone- Clone	h4b4	9.672	1525.724	216.045	4012.592	15.639
Ecad MO N-C	Non Clone- Clone	h4b4	9.672	1477.82	165.318	4095	15.639
Ecad MO N-C	Non Clone- Clone	h4b4	9.672	1376.014	188.239	4078.686	15.639
Ecad MO N-C	Non Clone- Clone	h4b4	9.672	1164.04	191.746	3276.324	15.639
Ecad MO N-C	Non Clone- Clone	h4b4	9.672	947.633	216.553	3322.659	15.639
Ecad MO N-C	Non Clone- Clone
Ecad MO N-C	Non Clone- Clone	h4b5	8.754	842.734	68.024	3877.311	14.145
Ecad MO N-C	Non Clone- Clone	h4b5	8.754	909.009	104.576	4027.15	14.145
Ecad MO N-C	Non Clone- Clone	h4b5	8.754	938.59	136.428	3334.794	14.145
Ecad MO N-C	Non Clone- Clone	h4b5	8.754	921.66	120.419	4063.783	14.145
Ecad MO N-C	Non Clone- Clone	h4b5	8.754	710.68	148.642	4091.981	14.145
Ecad MO N-C	Non Clone- Clone	h4b5	8.754	593.033	88.746	3348.035	14.145
Ecad MO N-C	Non Clone- Clone	h4b5	8.754	482.118	47.569	3305.167	14.145
Ecad MO N-C	Non Clone- Clone
Ecad MO N-C	Non Clone- Clone	h4b6	9.726	482.431	73.876	1088.365	15.713
Ecad MO N-C	Non Clone- Clone	h4b6	9.726	859.06	139.153	2060.32	15.713
Ecad MO N-C	Non Clone- Clone	h4b6	9.726	967.933	160.966	2880.745	15.713
Ecad MO N-C	Non Clone- Clone	h4b6	9.726	1011.335	185.227	2707.889	15.713
Ecad MO N-C	Non Clone- Clone	h4b6	9.726	1110.648	226.898	3152.044	15.713
Ecad MO N-C	Non Clone- Clone	h4b6	9.726	1437.007	252.79	3831.48	15.713
Ecad MO N-C	Non Clone- Clone	h4b6	9.726	1371.315	259.925	4060.223	15.713
Ecad MO N-C	Non Clone- Clone	h4b6	9.726	1047.315	269.102	3431.326	15.713
Ecad MO N-C	Non Clone- Clone
Ecad MO N-C	Non Clone- Clone	h4b7	10.645	983.93	211.008	2249.698	17.22
Ecad MO N-C	Non Clone- Clone	h4b7	10.645	1047.069	224.072	2900.052	17.22
Ecad MO N-C	Non Clone- Clone	h4b7	10.645	955.66	208.806	3436.712	17.22
Ecad MO N-C	Non Clone- Clone	h4b7	11.131	1081.505	137.897	3631.988	18.011
Ecad MO N-C	Non Clone- Clone	h4b7	11.131	1172.869	223.323	3520.091	18.011
Ecad MO N-C	Non Clone- Clone	h4b7	11.131	768.21	138.936	2537.206	18.011
Ecad MO N-C	Non Clone- Clone	h4b7	11.131	595.706	104.289	2832.814	18.011
Ecad MO N-C	Non Clone- Clone
Ecad MO N-C	Non Clone- Clone	h4b8	8.754	383.541	85.478	994.741	14.145
Ecad MO N-C	Non Clone- Clone	h4b8	8.754	849.031	157.078	2751.394	14.145
Ecad MO N-C	Non Clone- Clone	h4b8	8.754	955.403	185.941	2969.409	14.145
Ecad MO N-C	Non Clone- Clone	h4b8	8.7	1929.735	223.789	4022.236	14.057
Ecad MO N-C	Non Clone- Clone	h4b8	8.7	1870.747	315.369	4095	14.057
Ecad MO N-C	Non Clone- Clone	h4b8	8.7	1520.701	293.258	3887.558	14.057
Ecad MO N-C	Non Clone- Clone	h4b8	8.7	1033.331	345.409	2347.698	14.057
Ecad MO N-C	Non Clone- Clone	h4b8	8.7	884.568	192.664	3246.636	14.057
Ecad MO N-C	Non Clone- Clone
Ecad MO N-C	Non Clone- Clone	h4b9	6.376	364.11	124.091	741.777	10.279
Ecad MO N-C	Non Clone- Clone	h4b9	6.376	876.448	233.671	2357.206	10.279
Ecad MO N-C	Non Clone- Clone	h4b9	6.376	1405.067	462.517	3473.941	10.279
Ecad MO N-C	Non Clone- Clone	h4b9	6.376	1629.498	458.396	4061.467	10.279
Ecad MO N-C	Non Clone- Clone	h4b9	6.376	1922.282	500.398	4094.957	10.279
Ecad MO N-C	Non Clone- Clone	h4b9	6.376	2039.341	476.234	3910.682	10.279
Ecad MO N-C	Non Clone- Clone	h4b9	6.376	1681.918	383.875	4078.715	10.279
Ecad MO N-C	Non Clone- Clone	h4b9	6.376	1263.768	211.784	4095	10.279
Ecad MO N-C	Non Clone- Clone
Ecad MO N-C	Non Clone- Clone	h4b10	6.16	535.299	96.854	1491.167	9.925
Ecad MO N-C	Non Clone- Clone	h4b10	6.16	710.622	97.287	2380.676	9.925
Ecad MO N-C	Non Clone- Clone	h4b10	6.16	745.15	121.411	2213.639	9.925
Ecad MO N-C	Non Clone- Clone	h4b10	6.16	766.391	128.372	2568.417	9.925
Ecad MO N-C	Non Clone- Clone	h4b10	6.16	856.954	170.923	3196.156	9.925
Ecad MO N-C	Non Clone- Clone	h4b10	6.16	1072.259	155.607	3986.01	9.925
Ecad MO N-C	Non Clone- Clone	h4b10	6.268	1451.19	385.021	4095	10.102
Ecad MO N-C	Non Clone- Clone	h4b10	6.268	1709.892	396.179	4095	10.102
Ecad MO N-C	Non Clone- Clone	h4b10	6.268	1737.724	375.845	4095	10.102
Ecad MO N-C	Non Clone- Clone	h4b10	6.268	1340.771	274.848	3759.727	10.102
Ecad MO N-C	Non Clone- Clone	h4b10	6.268	810.967	191.03	3210.495	10.102
Ecad MO N-C	Non Clone- Clone
Ecad MO N-C	Non Clone- Clone
Ecad MO N-C	Non Clone- Clone	h4b12	4.431	461.205	77.934	1815.572	7.117
Ecad MO N-C	Non Clone- Clone	h4b12	4.431	597.355	41.222	2409.969	7.117
Ecad MO N-C	Non Clone- Clone	h4b12	4.431	763.473	57.586	3522.865	7.117
Ecad MO N-C	Non Clone- Clone	h4b12	4.431	930.673	92.712	4008.026	7.117
Ecad MO N-C	Non Clone- Clone	h4b12	4.431	1341.817	108.423	4095	7.117
Ecad MO N-C	Non Clone- Clone	h4b12	4.431	1789.864	183.959	4095	7.117
Ecad MO N-C	Non Clone- Clone	h4b12	4.431	1796.332	280.634	4095	7.117
Ecad MO N-C	Non Clone- Clone	h4b12	4.431	1749.506	351.716	4095	7.117
Ecad MO N-C	Non Clone- Clone	h4b12	4.431	1641.972	334.614	4011.135	7.117
Ecad MO N-C	Non Clone- Clone	h4b12	4.431	1410.253	440.198	3543.487	7.117
Ecad MO N-C	Non Clone- Clone
Ecad MO N-C	Non Clone- Clone	h4b13	5.998	371.535	91.261	954.104	9.664
Ecad MO N-C	Non Clone- Clone	h4b13	5.998	632.442	98.711	1956.93	9.664
Ecad MO N-C	Non Clone- Clone	h4b13	5.998	779.833	123.883	2329.7	9.664
Ecad MO N-C	Non Clone- Clone	h4b13	5.998	1014.495	186.719	2848.554	9.664
Ecad MO N-C	Non Clone- Clone	h4b13	5.998	1295.776	199.378	3114.81	9.664
Ecad MO N-C	Non Clone- Clone	h4b13	5.998	1536.004	203.726	3406.443	9.664
Ecad MO N-C	Non Clone- Clone	h4b13	5.998	1496.013	222.679	3857.357	9.664
Ecad MO N-C	Non Clone- Clone	h4b13	5.998	1405.942	204.116	3861.629	9.664
Ecad MO N-C	Non Clone- Clone	h4b13	5.998	1228.48	169.154	4065.782	9.664
Ecad MO N-C	Non Clone- Clone	h4b13	5.998	971.397	161.066	4072.167	9.664
Ecad MO N-C	Non Clone- Clone	h4b13	5.998	980.325	272.48	3545.75	9.664
Ecad MO N-C	Non Clone- Clone
Ecad MO N-C	Non Clone- Clone	h4b14	5.674	439.433	159.455	912.789	9.137
Ecad MO N-C	Non Clone- Clone	h4b14	5.674	803.492	308.025	1672.316	9.137
Ecad MO N-C	Non Clone- Clone	h4b14	5.674	1011.581	282.84	2072.895	9.137
Ecad MO N-C	Non Clone- Clone	h4b14	5.674	1288.78	237.08	2710.674	9.137
Ecad MO N-C	Non Clone- Clone	h4b14	5.674	1413.762	274.069	3521.163	9.137
Ecad MO N-C	Non Clone- Clone	h4b14	5.674	1243.669	215.824	3294.248	9.137
Ecad MO N-C	Non Clone- Clone	h4b14	5.674	1108.066	221.915	3734.735	9.137
Ecad MO N-C	Non Clone- Clone	h4b14	5.674	1935.253	358.366	4074.681	9.137
Ecad MO N-C	Non Clone- Clone	h4b14	5.674	1846.393	376.494	4077.692	9.137
Ecad MO N-C	Non Clone- Clone	h4b14	5.674	1754.045	371.576	4067.252	9.137
Ecad MO N-C	Non Clone- Clone	h4b14	5.674	1400.476	348.862	3883.443	9.137
Ecad MO N-C	Non Clone- Clone	h4b14	5.674	1036.995	171.823	3594.292	9.137
Ecad MO N-C	Non Clone- Clone
Ecad MO N-C	Non Clone- Clone	h4b15	11.293	489.306	114.647	1098.865	18.275
Ecad MO N-C	Non Clone- Clone	h4b15	11.293	595.59	157.486	1386.062	18.275
Ecad MO N-C	Non Clone- Clone	h4b15	11.293	688.399	189.97	1652.759	18.275
Ecad MO N-C	Non Clone- Clone	h4b15	11.293	671.624	158.155	1918.934	18.275
Ecad MO N-C	Non Clone- Clone	h4b15	11.833	1080.436	204.01	3682.869	19.153
Ecad MO N-C	Non Clone- Clone	h4b15	11.833	1235.789	164.098	3683.44	19.153
Ecad MO N-C	Non Clone- Clone	h4b15	11.833	1310.576	187.971	3814.041	19.153
Ecad MO N-C	Non Clone- Clone	h4b15	11.833	1306.872	157.965	4092.212	19.153
Ecad MO N-C	Non Clone- Clone	h4b15	13.13	1464.709	132.337	4095	21.262
Ecad MO N-C	Non Clone- Clone	h4b15	13.13	1282.319	123.019	4095	21.262
Ecad MO N-C	Non Clone- Clone	h4b15	13.13	1134.739	48.596	4095	21.262
Ecad MO N-C	Non Clone- Clone	h4b15	13.13	926.31	58.351	4094.802	21.262
Ecad MO N-C	Non Clone- Clone
Ecad MO N-C	Non Clone- Clone	h4b16	8.916	872.695	66.962	3225.418	14.409
Ecad MO N-C	Non Clone- Clone	h4b16	8.916	970.373	64.888	3169.954	14.409
Ecad MO N-C	Non Clone- Clone	h4b16	8.916	1176.232	98.511	3971.504	14.409
Ecad MO N-C	Non Clone- Clone	h4b16	8.916	1234.481	39.178	4081.819	14.409
Ecad MO N-C	Non Clone- Clone	h4b16	8.916	1161.079	147.504	3867.65	14.409
Ecad MO N-C	Non Clone- Clone	h4b16	8.916	931.122	114.913	2470.055	14.409
Ecad MO N-C	Non Clone- Clone	h4b16	8.916	614.609	68.63	2076.674	14.409
Ecad MO N-N	Non Clone- Non Clone	h1b1	7.403	266.038	24.201	867.821	11.949
Ecad MO N-N	Non Clone- Non Clone	h1b1	7.403	416.602	96.438	2824.917	11.949
Ecad MO N-N	Non Clone- Non Clone	h1b1	7.349	983.638	134.126	4095	11.861
Ecad MO N-N	Non Clone- Non Clone	h1b1	7.349	916.91	146.818	4095	11.861
Ecad MO N-N	Non Clone- Non Clone	h1b1	7.349	1048.593	131.147	4054.051	11.861
Ecad MO N-N	Non Clone- Non Clone	h1b1	7.349	989.094	144.126	4095	11.861
Ecad MO N-N	Non Clone- Non Clone	h1b1	7.349	907.745	200.733	4043.279	11.861
Ecad MO N-N	Non Clone- Non Clone
Ecad MO N-N	Non Clone- Non Clone	h1b2	7.457	731.324	56.841	2315.978	12.036
Ecad MO N-N	Non Clone- Non Clone	h1b2	7.457	694.868	137.43	3222.999	12.036
Ecad MO N-N	Non Clone- Non Clone	h1b2	7.133	1295.133	221.261	3620.219	11.509
Ecad MO N-N	Non Clone- Non Clone	h1b2	7.133	1450.976	275.63	3991.913	11.509
Ecad MO N-N	Non Clone- Non Clone	h1b2	7.133	1312.024	264.755	4095	11.509
Ecad MO N-N	Non Clone- Non Clone	h1b2	7.133	846.336	140.34	4024.35	11.509
Ecad MO N-N	Non Clone- Non Clone
Ecad MO N-N	Non Clone- Non Clone	h1b3	8.159	661.579	120.068	1852.949	13.179
Ecad MO N-N	Non Clone- Non Clone	h1b3	8.159	1078.869	177.481	3841.271	13.179
Ecad MO N-N	Non Clone- Non Clone	h1b3	8.159	1272.528	252.511	3387.97	13.179
Ecad MO N-N	Non Clone- Non Clone	h1b3	8.159	1302.094	315.536	4095	13.179
Ecad MO N-N	Non Clone- Non Clone	h1b3	8.159	1131.996	395.931	4095	13.179
Ecad MO N-N	Non Clone- Non Clone	h1b3	8.159	854.954	178.352	2294.995	13.179
Ecad MO N-N	Non Clone- Non Clone
Ecad MO N-N	Non Clone- Non Clone	h1b4	8.916	443.927	74.428	1440.629	14.409
Ecad MO N-N	Non Clone- Non Clone	h1b4	8.916	745.921	87.611	2072.794	14.409
Ecad MO N-N	Non Clone- Non Clone	h1b4	8.916	1134.142	219.215	3090.943	14.409
Ecad MO N-N	Non Clone- Non Clone	h1b4	8.916	1140.46	192.95	3590.017	14.409
Ecad MO N-N	Non Clone- Non Clone	h1b4	8.916	886.997	83.823	4095	14.409
Ecad MO N-N	Non Clone- Non Clone
Ecad MO N-N	Non Clone- Non Clone	h1b5	9.294	785.622	91.444	2739.997	15.024
Ecad MO N-N	Non Clone- Non Clone	h1b5	9.294	950.293	119.532	3179.283	15.024
Ecad MO N-N	Non Clone- Non Clone	h1b5	9.294	977.282	163.673	3598.815	15.024
Ecad MO N-N	Non Clone- Non Clone	h1b5	9.294	876.478	210.03	3076.334	15.024
Ecad MO N-N	Non Clone- Non Clone
Ecad MO N-N	Non Clone- Non Clone	h1b6	6.16	461.196	38.09	1194.935	9.928
Ecad MO N-N	Non Clone- Non Clone	h1b6	6.16	829.713	97.067	2237.881	9.928
Ecad MO N-N	Non Clone- Non Clone	h1b6	6.16	1019.07	168.878	3341.708	9.928
Ecad MO N-N	Non Clone- Non Clone	h1b6	6.16	994.981	214.413	2871.299	9.928
Ecad MO N-N	Non Clone- Non Clone	h1b6	6.16	896.789	125.735	2713.201	9.928
Ecad MO N-N	Non Clone- Non Clone
Ecad MO N-N	Non Clone- Non Clone	h1b7	9.456	491.257	18.638	2029.123	15.278
Ecad MO N-N	Non Clone- Non Clone	h1b7	9.456	922.136	39.289	3112.437	15.278
Ecad MO N-N	Non Clone- Non Clone	h1b7	9.456	1141.966	104.417	3621.815	15.278
Ecad MO N-N	Non Clone- Non Clone	h1b7	9.456	888.282	124.855	3562.655	15.278
Ecad MO N-N	Non Clone- Non Clone	h1b7	9.456	633.695	70.841	4028.905	15.278
Ecad MO N-N	Non Clone- Non Clone
Ecad MO N-N	Non Clone- Non Clone	h1b8	10.699	407.179	12.78	1109.694	17.308
Ecad MO N-N	Non Clone- Non Clone	h1b8	10.699	725.681	47.977	2156.86	17.308
Ecad MO N-N	Non Clone- Non Clone	h1b8	10.699	1135.251	74.619	3276.687	17.308
Ecad MO N-N	Non Clone- Non Clone	h1b8	10.699	1115.388	138.937	3198.871	17.308
Ecad MO N-N	Non Clone- Non Clone	h1b8	10.699	913.195	194.11	3388.358	17.308
Ecad MO N-N	Non Clone- Non Clone	h1b8	10.699	750.346	142.809	2551.691	17.308
Ecad MO N-N	Non Clone- Non Clone
Ecad MO N-N	Non Clone- Non Clone	h1b9	6.322	393.612	12.405	1282.484	10.192
Ecad MO N-N	Non Clone- Non Clone	h1b9	6.322	614.267	40.297	2338.744	10.192
Ecad MO N-N	Non Clone- Non Clone	h1b9	6.322	602.867	71.345	2432.633	10.192
Ecad MO N-N	Non Clone- Non Clone	h1b9	5.998	816.67	159.393	2555.805	9.664
Ecad MO N-N	Non Clone- Non Clone	h1b9	5.998	806.133	149.182	2128.37	9.664
Ecad MO N-N	Non Clone- Non Clone	h1b9	5.998	743.755	147.798	2134.043	9.664
Ecad MO N-N	Non Clone- Non Clone
Ecad MO N-N	Non Clone- Non Clone	h1b10	8.754	882.576	97.945	2986.453	14.145
Ecad MO N-N	Non Clone- Non Clone	h1b10	8.754	1134.462	89.472	3986.696	14.145
Ecad MO N-N	Non Clone- Non Clone	h1b10	8.754	903.486	189.059	3464.474	14.145
Ecad MO N-N	Non Clone- Non Clone	h1b10	8.754	743.12	174.229	2393.495	14.145
Ecad MO N-N	Non Clone- Non Clone
Ecad MO N-N	Non Clone- Non Clone	h1b11	10.266	267.492	4.347	1166.517	16.605
Ecad MO N-N	Non Clone- Non Clone	h1b11	10.266	449.216	38.915	1847.949	16.605
Ecad MO N-N	Non Clone- Non Clone	h1b11	10.266	646.822	91.292	2873.755	16.605
Ecad MO N-N	Non Clone- Non Clone	h1b11	9.564	951.521	87.014	2808.25	15.463
Ecad MO N-N	Non Clone- Non Clone	h1b11	9.564	951.809	150.013	2731.556	15.463
Ecad MO N-N	Non Clone- Non Clone	h1b11	9.564	780.67	168.975	3330.251	15.463
Ecad MO N-N	Non Clone- Non Clone	h1b11	9.564	384.244	81.565	1027.19	15.463
Ecad MO N-N	Non Clone- Non Clone
Ecad MO N-N	Non Clone- Non Clone	h1b12	7.241	488.638	40.187	1781.764	11.685
Ecad MO N-N	Non Clone- Non Clone	h1b12	7.241	554.344	63.165	2043.22	11.685
Ecad MO N-N	Non Clone- Non Clone	h1b12	7.241	494.938	98.18	1932.626	11.685
Ecad MO N-N	Non Clone- Non Clone	h1b12	7.241	414.078	58.413	1412.544	11.685
Ecad MO N-N	Non Clone- Non Clone	h1b12	6.268	654.632	113.257	1732.825	10.104
Ecad MO N-N	Non Clone- Non Clone	h1b12	6.268	452.02	114.662	2058.27	10.104
Ecad MO N-N	Non Clone- Non Clone	h1b12	6.268	363.293	81.123	1719.163	10.104
Ecad MO N-N	Non Clone- Non Clone	h3b3	15.022	416.011	2.199	1855.135	24.337
Ecad MO N-N	Non Clone- Non Clone	h3b3	15.022	498.084	2.389	2036.687	24.337
Ecad MO N-N	Non Clone- Non Clone	h3b3	15.022	554.129	12.243	1961.543	24.337
Ecad MO N-N	Non Clone- Non Clone	h3b3	15.022	586.237	49.186	3341.265	24.337
Ecad MO N-N	Non Clone- Non Clone
Ecad MO N-N	Non Clone- Non Clone	h3b4	6.592	515.313	161.92	1366.055	10.631
Ecad MO N-N	Non Clone- Non Clone	h3b4	6.592	859.229	121.88	1904.268	10.631
Ecad MO N-N	Non Clone- Non Clone	h3b4	6.592	1151.447	236.47	2619.248	10.631
Ecad MO N-N	Non Clone- Non Clone	h3b4	6.592	1500.698	205.881	3712.789	10.631
Ecad MO N-N	Non Clone- Non Clone	h3b4	6.592	1669.666	435.928	4093.437	10.631
Ecad MO N-N	Non Clone- Non Clone	h3b4	6.592	1131.775	246.278	4063.491	10.631
Ecad MO N-N	Non Clone- Non Clone	h3b4	6.592	876.014	146.784	3475.363	10.631
Ecad MO N-N	Non Clone- Non Clone
Ecad MO N-N	Non Clone- Non Clone	h3b5	6.862	698.935	29.649	2159.194	11.07
Ecad MO N-N	Non Clone- Non Clone	h3b5	6.862	923.146	99.405	2849.962	11.07
Ecad MO N-N	Non Clone- Non Clone	h3b5	6.862	1116.109	166.004	3121.143	11.07
Ecad MO N-N	Non Clone- Non Clone	h3b5	6.862	1138.825	171.316	2812.909	11.07
Ecad MO N-N	Non Clone- Non Clone	h3b5	6.862	788.484	71.169	3452.241	11.07
Ecad MO N-N	Non Clone- Non Clone	h3b5	6.862	356.05	45.671	1936.576	11.07
Ecad MO N-N	Non Clone- Non Clone
Ecad MO N-N	Non Clone- Non Clone	h3b6	14.157	406.879	40.596	1541.11	22.931
Ecad MO N-N	Non Clone- Non Clone	h3b6	14.157	452.407	54.606	2042.793	22.931
Ecad MO N-N	Non Clone- Non Clone	h3b6	14.157	532.142	72.149	3551.381	22.931
Ecad MO N-N	Non Clone- Non Clone	h3b6	14.157	591.196	46.399	3785.163	22.931
Ecad MO N-N	Non Clone- Non Clone	h3b6	14.157	627.196	47.607	2942.901	22.931
Ecad MO N-N	Non Clone- Non Clone
Ecad MO N-N	Non Clone- Non Clone	h3b7	6.43	463.956	83.012	1065.095	10.367
Ecad MO N-N	Non Clone- Non Clone	h3b7	6.43	704.382	75.511	1736.404	10.367
Ecad MO N-N	Non Clone- Non Clone	h3b7	6.43	823.666	105.62	2092.559	10.367
Ecad MO N-N	Non Clone- Non Clone	h3b7	6.43	880.425	52.949	2195.169	10.367
Ecad MO N-N	Non Clone- Non Clone	h3b7	6.43	749.47	40.44	3522.871	10.367
Ecad MO N-N	Non Clone- Non Clone	h3b7	6.43	466.385	44.661	2526.462	10.367
Ecad MO N-N	Non Clone- Non Clone
Ecad MO N-N	Non Clone- Non Clone	h3b8	13.887	392.898	67.295	1729.208	22.492
Ecad MO N-N	Non Clone- Non Clone	h3b8	13.887	535.402	86.584	1721.103	22.492
Ecad MO N-N	Non Clone- Non Clone	h3b8	13.887	624.221	65.932	1620.351	22.492
Ecad MO N-N	Non Clone- Non Clone	h3b8	13.887	744.931	57.85	2868.098	22.492
Ecad MO N-N	Non Clone- Non Clone	h3b8	13.887	751.905	96.989	2892.21	22.492
Ecad MO N-N	Non Clone- Non Clone	h3b8	13.887	545.135	58.505	2418.362	22.492
Ecad MO N-N	Non Clone- Non Clone
Ecad MO N-N	Non Clone- Non Clone	h4b1	8.321	885.754	134.478	3001.067	13.442
Ecad MO N-N	Non Clone- Non Clone	h4b1	8.321	912.796	94.291	2784.244	13.442
Ecad MO N-N	Non Clone- Non Clone	h4b1	8.321	932.703	91.15	2907.336	13.442
Ecad MO N-N	Non Clone- Non Clone	h4b1	8.321	934.054	142.094	2740.061	13.442
Ecad MO N-N	Non Clone- Non Clone	h4b1	8.321	704.36	136.805	3056.162	13.442
Ecad MO N-N	Non Clone- Non Clone	h4b1	8.321	506.935	46.166	2881.215	13.442
Ecad MO N-N	Non Clone- Non Clone
Ecad MO N-N	Non Clone- Non Clone	h4b2	9.186	826.319	84.324	1906.815	14.848
Ecad MO N-N	Non Clone- Non Clone	h4b2	9.186	1287.445	253.213	3397.74	14.848
Ecad MO N-N	Non Clone- Non Clone	h4b2	9.186	1486.755	249.376	3972.647	14.848
Ecad MO N-N	Non Clone- Non Clone	h4b2	9.186	1699.462	306.029	4093.224	14.848
Ecad MO N-N	Non Clone- Non Clone	h4b2	9.186	1763.469	242.883	4094.08	14.848
Ecad MO N-N	Non Clone- Non Clone	h4b2	9.186	1440.451	299.505	4095	14.848
Ecad MO N-N	Non Clone- Non Clone	h4b2	9.186	1204.482	191.081	4042.858	14.848
Ecad MO N-N	Non Clone- Non Clone	h4b2	9.186	925.354	128.982	4095	14.848
Ecad MO N-N	Non Clone- Non Clone	h4b2	9.186	758.729	84.86	3990.53	14.848
Ecad MO N-N	Non Clone- Non Clone	h4b2	9.186	625.598	36.492	2681.44	14.848
Ecad MO N-N	Non Clone- Non Clone
Ecad MO N-N	Non Clone- Non Clone	h4b3	10.158	740.083	159.952	1655.927	16.428
Ecad MO N-N	Non Clone- Non Clone	h4b3	10.158	908.792	180.63	2434.342	16.428
Ecad MO N-N	Non Clone- Non Clone	h4b3	10.158	1125.103	207.159	3047.348	16.428
Ecad MO N-N	Non Clone- Non Clone	h4b3	10.158	1339.871	234.687	3598.987	16.428
Ecad MO N-N	Non Clone- Non Clone	h4b3	10.158	1646.202	294.059	4054.672	16.428
Ecad MO N-N	Non Clone- Non Clone	h4b3	10.158	1759.731	379.893	3846.755	16.428
Ecad MO N-N	Non Clone- Non Clone	h4b3	10.158	1768.053	391.994	4095	16.428
Ecad MO N-N	Non Clone- Non Clone	h4b3	10.158	1748.287	328.284	4095	16.428
Ecad MO N-N	Non Clone- Non Clone	h4b3	10.158	1595.525	117.25	4095	16.428
Ctrl MO C-C	Clone- Clone	h5b1	13.725	523.756	181.981	988.904	22.228
Ctrl MO C-C	Clone- Clone	h5b1	13.725	630.739	179.158	1289.213	22.228
Ctrl MO C-C	Clone- Clone	h5b1	13.725	755.622	179.006	1478.746	22.228
Ctrl MO C-C	Clone- Clone	h5b1	13.725	902.893	245.205	1937.829	22.228
Ctrl MO C-C	Clone- Clone	h5b1	13.725	1018.804	208.319	2097.594	22.228
Ctrl MO C-C	Clone- Clone	h5b1	13.725	1035.894	222.736	2165.261	22.228
Ctrl MO C-C	Clone- Clone	h5b1	13.725	988.105	259.044	1991.748	22.228
Ctrl MO C-C	Clone- Clone	h5b1	13.725	837.12	276.867	1846.906	22.228
Ctrl MO C-C	Clone- Clone	h5b1	13.725	605.808	193.171	1638.794	22.228
Ctrl MO C-C	Clone- Clone
Ctrl MO C-C	Clone- Clone	h5b2	9.78	422.99	164.725	1131.443	15.815
Ctrl MO C-C	Clone- Clone	h5b2	9.78	486.627	185.808	1259.3	15.815
Ctrl MO C-C	Clone- Clone	h5b2	9.78	573.819	196.315	1469.88	15.815
Ctrl MO C-C	Clone- Clone	h5b2	9.78	642.026	187.534	1901.018	15.815
Ctrl MO C-C	Clone- Clone	h5b2	9.78	655.819	228.606	1616.788	15.815
Ctrl MO C-C	Clone- Clone
Ctrl MO C-C	Clone- Clone	h5b3	9.51	423.577	143.556	788.068	15.375
Ctrl MO C-C	Clone- Clone	h5b3	9.51	492.734	130.211	1015.785	15.375
Ctrl MO C-C	Clone- Clone	h5b3	9.51	578.356	146.167	1239.95	15.375
Ctrl MO C-C	Clone- Clone	h5b3	9.51	673.693	149.763	1419.05	15.375
Ctrl MO C-C	Clone- Clone	h5b3	9.51	691.724	191.742	1592.289	15.375
Ctrl MO C-C	Clone- Clone	h5b3	9.51	626.269	203.873	1462.663	15.375
Ctrl MO C-C	Clone- Clone
Ctrl MO C-C	Clone- Clone	h6b1	9.348	636.874	214.848	1255.582	15.112
Ctrl MO C-C	Clone- Clone	h6b1	9.348	835.131	211.561	1722.275	15.112
Ctrl MO C-C	Clone- Clone	h6b1	9.348	929.027	257.676	1978.595	15.112
Ctrl MO C-C	Clone- Clone	h6b1	9.348	915.894	262.719	1902.537	15.112
Ctrl MO C-C	Clone- Clone	h6b1	9.348	747.612	327.219	1619.717	15.112
Ctrl MO C-C	Clone- Clone
Ctrl MO C-C	Clone- Clone	h6b2	9.294	603.15	228.509	1239.476	15.024
Ctrl MO C-C	Clone- Clone	h6b2	9.294	768.04	240.015	1505.214	15.024
Ctrl MO C-C	Clone- Clone	h6b2	9.294	869.136	245.103	1876.38	15.024
Ctrl MO C-C	Clone- Clone	h6b2	9.294	896.084	314.084	2050.362	15.024
Ctrl MO C-C	Clone- Clone	h6b2	9.294	772.372	254.801	1889.665	15.024
Ctrl MO C-C	Clone- Clone	h6b2	9.294	584.83	235.072	1332.949	15.024
Ctrl MO C-C	Clone- Clone
Ctrl MO C-C	Clone- Clone	h6b3	7.673	721.543	287.798	1296.091	12.388
Ctrl MO C-C	Clone- Clone	h6b3	7.673	943.793	396.103	1829.995	12.388
Ctrl MO C-C	Clone- Clone	h6b3	7.673	1055.16	475.293	2267.349	12.388
Ctrl MO C-C	Clone- Clone	h6b3	7.673	1104.119	558.743	1987.003	12.388
Ctrl MO C-C	Clone- Clone	h6b3	7.673	1042.998	478.85	2310.638	12.388
Ctrl MO C-C	Clone- Clone
Ctrl MO C-C	Clone- Clone	h6b4	8.862	470.175	180.357	1219.652	14.32
Ctrl MO C-C	Clone- Clone	h6b4	8.862	612.484	210.047	1463.942	14.32
Ctrl MO C-C	Clone- Clone	h6b4	8.862	698.688	237.796	1565.706	14.32
Ctrl MO C-C	Clone- Clone	h6b4	8.862	738.421	279.438	1595.313	14.32
Ctrl MO C-C	Clone- Clone	h6b4	8.862	691.397	263.75	1536.628	14.32
Ctrl MO C-C	Clone- Clone	h6b4	8.862	595.468	184.91	1420.386	14.32
Ctrl MO C-C	Clone- Clone	h7b1	9.78	232.342	105.373	538.429	15.815
Ctrl MO C-C	Clone- Clone	h7b1	9.78	254.259	113.17	608.338	15.815
Ctrl MO C-C	Clone- Clone	h7b1	9.78	263.67	118.514	664.89	15.815
Ctrl MO C-C	Clone- Clone	h7b1	9.78	268.011	115.618	613.642	15.815
Ctrl MO C-C	Clone- Clone	h7b1	9.78	272.001	109.108	639.416	15.815
Ctrl MO C-C	Clone- Clone	h7b1	9.78	273.543	134.956	588.536	15.815
Ctrl MO C-C	Clone- Clone	h7b1	9.78	264.757	130.021	495.294	15.815
Ctrl MO C-C	Clone- Clone	h7b1	9.78	246.386	135.503	430.296	15.815
Ctrl MO C-C	Clone- Clone	h7b1	9.78	230.147	109.316	440.368	15.815
Ctrl MO C-C	Clone- Clone	h7b1	9.78	202.492	109.967	416.604	15.815
Ctrl MO C-C	Clone- Clone	h7b1	9.78	176.905	101.673	381.708	15.815
Ctrl MO C-C	Clone- Clone	h8b1	8.7	238.499	98.332	722.375	14.057
Ctrl MO C-C	Clone- Clone	h8b1	8.7	243.251	96.803	640.011	14.057
Ctrl MO C-C	Clone- Clone	h8b1	8.7	251.957	98.312	575.065	14.057
Ctrl MO C-C	Clone- Clone	h8b1	8.7	254.752	101.774	682.324	14.057
Ctrl MO C-C	Clone- Clone	h8b1	8.7	254.12	99.352	627.299	14.057
Ctrl MO C-C	Clone- Clone	h8b1	8.7	254.933	109.064	697.446	14.057
Ctrl MO C-C	Clone- Clone
Ctrl MO C-C	Clone- Clone	h8b2	10.05	187.098	96.516	537.386	16.254
Ctrl MO C-C	Clone- Clone	h8b2	10.05	208.399	102.156	746.251	16.254
Ctrl MO C-C	Clone- Clone	h8b2	10.05	224.91	100.435	849.375	16.254
Ctrl MO C-C	Clone- Clone	h8b2	10.05	228.877	98.348	949.023	16.254
Ctrl MO C-C	Clone- Clone	h8b2	10.05	228.907	104.439	908.401	16.254
Ctrl MO C-C	Clone- Clone	h8b2	10.05	225.165	111.151	861.704	16.254
Ctrl MO C-C	Clone- Clone	h8b2	10.05	214.406	98.782	632.097	16.254
Ctrl MO C-C	Clone- Clone	h8b2	10.05	210.941	107.1	544.686	16.254
Ctrl MO C-C	Clone- Clone	h9b1	9.51	572.282	163.792	1157.993	15.375
Ctrl MO C-C	Clone- Clone	h9b1	9.51	571.165	162.877	1350.648	15.375
Ctrl MO C-C	Clone- Clone	h9b1	9.51	555.98	159.919	1147.646	15.375
Ctrl MO C-C	Clone- Clone	h9b1	9.51	514.963	151.104	1046.763	15.375
Ctrl MO C-C	Clone- Clone	h9b1	9.51	446.349	175.631	935.882	15.375
Ctrl MO C-C	Clone- Clone	h9b1	9.51	385.086	144.003	814.114	15.375
Ctrl MO C-C	Clone- Clone	h9b1	9.51	331.849	138.185	759.401	15.375
Ctrl MO C-C	Clone- Clone	h9b1	9.51	298.665	132.384	782.864	15.375
Ctrl MO C-C	Clone- Clone	h9b1	9.51	269.74	130.96	748.302	15.375
Ctrl MO C-C	Clone- Clone	h9b1	9.51	258.536	132.253	539.462	15.375
Ctrl MO C-C	Clone- Clone
Ctrl MO C-C	Clone- Clone	h9b2	8.591	376.764	132.562	1049.455	13.882
Ctrl MO C-C	Clone- Clone	h9b2	8.591	408.836	145.593	1013.78	13.882
Ctrl MO C-C	Clone- Clone	h9b2	8.591	415.658	144.683	1029.175	13.882
Ctrl MO C-C	Clone- Clone	h9b2	8.591	405.402	129.037	973.449	13.882
Ctrl MO C-C	Clone- Clone	h9b2	8.591	397.13	122.803	1110.24	13.882
Ctrl MO C-C	Clone- Clone	h9b2	8.591	386.335	132.511	1155.554	13.882
Ctrl MO C-C	Clone- Clone	h9b2	8.591	363.689	128.03	946.812	13.882
Ctrl MO C-C	Clone- Clone	h9b2	8.591	350.015	140.701	919.742	13.882
Ctrl MO C-C	Clone- Clone	h9b2	8.591	330.587	131.81	989.125	13.882
Ctrl MO C-C	Clone- Clone	h9b2	8.591	334.253	126.387	948.337	13.882
Ctrl MO C-C	Clone- Clone	h9b2	8.591	324.925	123.078	837.881	13.882
Ctrl MO C-C	Clone- Clone	h9b2	8.591	311.191	116.119	879.305	13.882
Ctrl MO C-C	Clone- Clone	h9b2	8.591	305.654	143.408	857.109	13.882
Ctrl MO C-C	Clone- Clone
Ctrl MO C-C	Clone- Clone	h9b3	6.106	331.935	135.693	782.228	9.84
Ctrl MO C-C	Clone- Clone	h9b3	6.106	354.73	176.252	770.329	9.84
Ctrl MO C-C	Clone- Clone	h9b3	6.106	347.614	166.6	898.621	9.84
Ctrl MO C-C	Clone- Clone	h9b3	6.106	337.611	138.812	925.418	9.84
Ctrl MO C-C	Clone- Clone	h9b3	6.862	518.74	196.923	977.502	11.07
Ctrl MO C-C	Clone- Clone	h9b3	6.862	567.348	189.391	1093.059	11.07
Ctrl MO C-C	Clone- Clone	h9b3	6.862	566.616	218.792	1129.36	11.07
Ctrl MO C-C	Clone- Clone	h9b3	6.862	550.013	223.003	942.31	11.07
Ctrl MO C-C	Clone- Clone	h9b3	6.862	526.722	227.287	1072.549	11.07
Ctrl MO C-C	Clone- Clone	h9b3	6.862	511.186	244.08	938.501	11.07
Ctrl MO C-C	Clone- Clone	h9b3	6.862	486.103	198.03	960.71	11.07
Ctrl MO C-C	Clone- Clone	h9b3	6.862	457.177	179.621	889.983	11.07
Ctrl MO C-C	Clone- Clone	h9b3	6.862	427.189	202.186	895.278	11.07
Ctrl MO N-C	Non Clone- Clone	h5b1	10.158	503.711	134.455	1362.852	16.43
Ctrl MO N-C	Non Clone- Clone	h5b1	10.158	521.35	143.899	1636.886	16.43
Ctrl MO N-C	Non Clone- Clone	h5b1	10.158	496.625	131.994	1555.992	16.43
Ctrl MO N-C	Non Clone- Clone	h5b1	10.158	425.263	127.706	1513.126	16.43
Ctrl MO N-C	Non Clone- Clone	h5b1	10.158	706.908	159.08	1574.244	16.43
Ctrl MO N-C	Non Clone- Clone	h5b1	10.158	658.38	147.637	1481.697	16.43
Ctrl MO N-C	Non Clone- Clone	h5b1	10.158	597.875	146.4	1349.488	16.43
Ctrl MO N-C	Non Clone- Clone	h5b1	10.158	549.034	131.463	1382.885	16.43
Ctrl MO N-C	Non Clone- Clone	h5b1	10.158	491.447	145.092	1187.638	16.43
Ctrl MO N-C	Non Clone- Clone	h5b1	10.158	436.095	133.884	1322.403	16.43
Ctrl MO N-C	Non Clone- Clone
Ctrl MO N-C	Non Clone- Clone	h5b2	11.131	366.78	150.281	1060.221	18.011
Ctrl MO N-C	Non Clone- Clone	h5b2	11.131	433.647	129.245	1039.497	18.011
Ctrl MO N-C	Non Clone- Clone	h5b2	11.131	512.694	140.259	1120.989	18.011
Ctrl MO N-C	Non Clone- Clone	h5b2	11.131	629.403	152.606	1309.971	18.011
Ctrl MO N-C	Non Clone- Clone	h5b2	11.131	725.109	162.449	1490.426	18.011
Ctrl MO N-C	Non Clone- Clone	h5b2	11.131	762.908	174.651	1434.163	18.011
Ctrl MO N-C	Non Clone- Clone	h5b2	11.131	737.952	188.164	1381.226	18.011
Ctrl MO N-C	Non Clone- Clone	h5b2	11.131	704.216	231.632	1301.855	18.011
Ctrl MO N-C	Non Clone- Clone	h5b2	11.131	605.608	195.28	1260.047	18.011
Ctrl MO N-C	Non Clone- Clone	h5b2	11.131	473.083	182.156	1001.412	18.011
Ctrl MO N-C	Non Clone- Clone	h5b2	11.131	473.083	182.156	1001.412	18.011
Ctrl MO N-C	Non Clone- Clone
Ctrl MO N-C	Non Clone- Clone	h5b3	8.321	318.953	125.061	740.534	13.442
Ctrl MO N-C	Non Clone- Clone	h5b3	8.321	385.711	149.253	869.861	13.442
Ctrl MO N-C	Non Clone- Clone	h5b3	8.321	453.627	154.828	1046.26	13.442
Ctrl MO N-C	Non Clone- Clone	h5b3	8.321	550.024	152.61	1284.81	13.442
Ctrl MO N-C	Non Clone- Clone	h5b3	8.321	607.516	141.994	1494.335	13.442
Ctrl MO N-C	Non Clone- Clone	h5b3	8.321	618.567	164.095	1380.797	13.442
Ctrl MO N-C	Non Clone- Clone	h5b3	8.321	562.151	168.946	1274.069	13.442
Ctrl MO N-C	Non Clone- Clone	h5b3	8.321	484.804	184.878	1257.709	13.442
Ctrl MO N-C	Non Clone- Clone	h5b3	8.321	425.814	184.935	1047.793	13.442
Ctrl MO N-C	Non Clone- Clone	h5b3	8.321	425.402	187.977	943.525	13.442
Ctrl MO N-C	Non Clone- Clone
Ctrl MO N-C	Non Clone- Clone	h5b4	5.728	543.688	163.827	1068.383	9.225
Ctrl MO N-C	Non Clone- Clone	h5b4	5.728	640.462	178.093	1265.26	9.225
Ctrl MO N-C	Non Clone- Clone	h5b4	5.728	727.265	229.388	1459.335	9.225
Ctrl MO N-C	Non Clone- Clone	h5b4	5.728	780.63	274.046	1569.15	9.225
Ctrl MO N-C	Non Clone- Clone	h5b4	5.728	721.088	284.151	1601.326	9.225
Ctrl MO N-C	Non Clone- Clone	h5b4	5.728	681.228	291.707	1497.39	9.225
Ctrl MO N-C	Non Clone- Clone	h5b4	5.728	629.815	283.482	1338.2	9.225
Ctrl MO N-C	Non Clone- Clone	h5b4	5.728	525.341	244.843	1122.254	9.225
Ctrl MO N-C	Non Clone- Clone
Ctrl MO N-C	Non Clone- Clone	h5b5	8.808	482.089	178.591	923.428	14.233
Ctrl MO N-C	Non Clone- Clone	h5b5	8.808	584.302	224.025	1079.747	14.233
Ctrl MO N-C	Non Clone- Clone	h5b5	8.808	743.279	259.528	1502.786	14.233
Ctrl MO N-C	Non Clone- Clone	h5b5	8.808	865.668	247.733	1801.439	14.233
Ctrl MO N-C	Non Clone- Clone	h5b5	8.808	892.76	240.59	1985.332	14.233
Ctrl MO N-C	Non Clone- Clone	h5b5	8.808	861.172	286.018	1729.416	14.233
Ctrl MO N-C	Non Clone- Clone	h5b5	8.808	830.397	299.943	1683.46	14.233
Ctrl MO N-C	Non Clone- Clone	h5b5	8.808	783.005	227.226	1736.309	14.233
Ctrl MO N-C	Non Clone- Clone
Ctrl MO N-C	Non Clone- Clone	h5b6	6.268	431.945	132.778	768.309	10.104
Ctrl MO N-C	Non Clone- Clone	h5b6	6.268	529.054	136.912	1026.36	10.104
Ctrl MO N-C	Non Clone- Clone	h5b6	6.268	664.314	168.22	1431.032	10.104
Ctrl MO N-C	Non Clone- Clone	h5b6	6.268	769.907	226.938	1626.057	10.104
Ctrl MO N-C	Non Clone- Clone	h5b6	6.268	742.014	243.235	2025.266	10.104
Ctrl MO N-C	Non Clone- Clone	h5b6	6.268	689.465	249.248	2054.499	10.104
Ctrl MO N-C	Non Clone- Clone	h5b6	6.268	614.102	236.246	1755.329	10.104
Ctrl MO N-C	Non Clone- Clone	h5b6	6.268	554.114	217.824	1579.398	10.104
Ctrl MO N-C	Non Clone- Clone	h5b6	6.268	468.659	201.615	1622.47	10.104
Ctrl MO N-C	Non Clone- Clone
Ctrl MO N-C	Non Clone- Clone	h5b7	13.4	282.423	115.164	610.551	21.701
Ctrl MO N-C	Non Clone- Clone	h5b7	13.4	316.274	121.703	768.939	21.701
Ctrl MO N-C	Non Clone- Clone	h5b7	13.4	354.19	142.219	905.149	21.701
Ctrl MO N-C	Non Clone- Clone	h5b7	13.4	376.13	149.818	1069.272	21.701
Ctrl MO N-C	Non Clone- Clone	h5b7	13.4	622.111	144.331	1664.473	21.701
Ctrl MO N-C	Non Clone- Clone	h5b7	13.4	610.718	174.754	1528.437	21.701
Ctrl MO N-C	Non Clone- Clone	h5b7	13.4	624.917	181.675	1545.202	21.701
Ctrl MO N-C	Non Clone- Clone	h5b7	13.4	640.753	211.799	1347.412	21.701
Ctrl MO N-C	Non Clone- Clone
Ctrl MO N-C	Non Clone- Clone	h5b8	9.834	520.954	180.584	1036.299	15.902
Ctrl MO N-C	Non Clone- Clone	h5b8	9.834	694.447	208.031	1401.114	15.902
Ctrl MO N-C	Non Clone- Clone	h5b8	9.834	869.598	259.978	1747.358	15.902
Ctrl MO N-C	Non Clone- Clone	h5b8	9.834	949.165	264.706	1873.346	15.902
Ctrl MO N-C	Non Clone- Clone	h5b8	9.834	951.678	387.529	1961.069	15.902
Ctrl MO N-C	Non Clone- Clone	h5b8	9.834	852.091	265.913	2196.92	15.902
Ctrl MO N-C	Non Clone- Clone	h5b8	9.834	723.963	211.409	2247.953	15.902
Ctrl MO N-C	Non Clone- Clone	h6b1	11.455	631.225	189.951	1802.179	18.536
Ctrl MO N-C	Non Clone- Clone	h6b1	11.455	753.911	237.282	1806.435	18.536
Ctrl MO N-C	Non Clone- Clone	h6b1	11.455	794.323	266.357	1727.348	18.536
Ctrl MO N-C	Non Clone- Clone	h6b1	11.455	805.198	282.681	1700.086	18.536
Ctrl MO N-C	Non Clone- Clone	h6b1	11.455	806.048	362.39	1905.872	18.536
Ctrl MO N-C	Non Clone- Clone	h6b1	11.455	732.984	342.213	1947.079	18.536
Ctrl MO N-C	Non Clone- Clone
Ctrl MO N-C	Non Clone- Clone	h6b2	7.457	907.886	253.975	1555.906	12.037
Ctrl MO N-C	Non Clone- Clone	h6b2	7.457	1073.48	397.474	2027.46	12.037
Ctrl MO N-C	Non Clone- Clone	h6b2	7.457	1086.85	384.021	2001.868	12.037
Ctrl MO N-C	Non Clone- Clone	h6b2	7.457	999.471	443.386	2045.872	12.037
Ctrl MO N-C	Non Clone- Clone	h6b2	7.457	911.292	373.921	1779.531	12.037
Ctrl MO N-C	Non Clone- Clone	h6b2	7.457	761.172	281.665	1643.16	12.037
Ctrl MO N-C	Non Clone- Clone
Ctrl MO N-C	Non Clone- Clone	h6b3	8.808	699.939	246.887	1521.87	14.233
Ctrl MO N-C	Non Clone- Clone	h6b3	8.808	835.756	232.957	1863.251	14.233
Ctrl MO N-C	Non Clone- Clone	h6b3	8.808	870.595	332.183	1802.364	14.233
Ctrl MO N-C	Non Clone- Clone	h6b3	8.808	834.393	379.278	1532.025	14.233
Ctrl MO N-C	Non Clone- Clone	h6b3	8.808	800.02	396.964	1487.247	14.233
Ctrl MO N-C	Non Clone- Clone	h6b3	8.808	728.053	304.082	1593.604	14.233
Ctrl MO N-C	Non Clone- Clone
Ctrl MO N-C	Non Clone- Clone	h6b4	8.321	600.582	227.638	1217.72	13.44
Ctrl MO N-C	Non Clone- Clone	h6b4	8.321	755.108	248.5	1624.085	13.44
Ctrl MO N-C	Non Clone- Clone	h6b4	8.321	825.916	301.982	1837.4	13.44
Ctrl MO N-C	Non Clone- Clone	h6b4	8.321	826.059	306.677	1568.901	13.44
Ctrl MO N-C	Non Clone- Clone	h6b4	8.321	758.113	339.669	1750.332	13.44
Ctrl MO N-C	Non Clone- Clone	h6b4	8.321	620.577	302.335	1312.779	13.44
Ctrl MO N-C	Non Clone- Clone
Ctrl MO N-C	Non Clone- Clone	h6b5	9.294	627.761	226.589	1116.063	15.024
Ctrl MO N-C	Non Clone- Clone	h6b5	9.294	823.842	297.958	1631.456	15.024
Ctrl MO N-C	Non Clone- Clone	h6b5	9.294	934.136	303.791	1741.317	15.024
Ctrl MO N-C	Non Clone- Clone	h6b5	9.294	947.672	343.654	1932.483	15.024
Ctrl MO N-C	Non Clone- Clone	h6b5	9.294	842.603	320.517	1969.38	15.024
Ctrl MO N-C	Non Clone- Clone	h6b5	9.294	668.725	286.184	1544.586	15.024
Ctrl MO N-C	Non Clone- Clone
Ctrl MO N-C	Non Clone- Clone	h6b6	8.7	523.563	218.286	980.241	14.057
Ctrl MO N-C	Non Clone- Clone	h6b6	8.7	709.551	254.523	1526.071	14.057
Ctrl MO N-C	Non Clone- Clone	h6b6	8.7	842.249	333.682	1730.953	14.057
Ctrl MO N-C	Non Clone- Clone	h6b6	8.7	939.64	364.619	1981.101	14.057
Ctrl MO N-C	Non Clone- Clone	h6b6	8.7	933.883	340.863	1957.492	14.057
Ctrl MO N-C	Non Clone- Clone	h6b6	8.7	768.373	306.222	1684.762	14.057
Ctrl MO N-C	Non Clone- Clone
Ctrl MO N-C	Non Clone- Clone	h6b7	11.131	473.596	195.794	990.722	18.011
Ctrl MO N-C	Non Clone- Clone	h6b7	11.131	557.657	215.205	1125.137	18.011
Ctrl MO N-C	Non Clone- Clone	h6b7	11.131	655.451	235.336	1348.746	18.011
Ctrl MO N-C	Non Clone- Clone	h6b7	11.131	655.734	281.979	1182.366	18.011
Ctrl MO N-C	Non Clone- Clone	h6b7	11.131	583.632	260.095	1133.943	18.011
Ctrl MO N-C	Non Clone- Clone	h6b7	11.131	504.105	254.108	1070.38	18.011
Ctrl MO N-C	Non Clone- Clone
Ctrl MO N-C	Non Clone- Clone	h6b8	12.428	484.17	157.008	1122.171	20.12
Ctrl MO N-C	Non Clone- Clone	h6b8	12.428	569.048	198.63	1182.805	20.12
Ctrl MO N-C	Non Clone- Clone	h6b8	12.428	655.693	214.719	1346.059	20.12
Ctrl MO N-C	Non Clone- Clone	h6b8	12.428	666.851	244.594	1288.479	20.12
Ctrl MO N-C	Non Clone- Clone	h6b8	12.428	609.894	250.444	1145.842	20.12
Ctrl MO N-C	Non Clone- Clone	h6b8	12.428	548.389	248.575	998.223	20.12
Ctrl MO N-C	Non Clone- Clone	h7b2	12.59	211.584	100.84	479.042	20.383
Ctrl MO N-C	Non Clone- Clone	h7b2	12.59	226.251	108.54	507.345	20.383
Ctrl MO N-C	Non Clone- Clone	h7b2	12.59	238.609	112.672	484.942	20.383
Ctrl MO N-C	Non Clone- Clone	h7b2	12.59	256.453	112.449	565.901	20.383
Ctrl MO N-C	Non Clone- Clone	h7b2	12.59	266.012	122.077	535.989	20.383
Ctrl MO N-C	Non Clone- Clone	h7b2	12.59	262.039	112.096	544.548	20.383
Ctrl MO N-C	Non Clone- Clone	h7b2	12.59	250.541	118.595	542.437	20.383
Ctrl MO N-C	Non Clone- Clone
Ctrl MO N-C	Non Clone- Clone	h7b3	10.699	250.339	93.645	742.778	17.308
Ctrl MO N-C	Non Clone- Clone	h7b3	10.699	283.974	96.527	983.985	17.308
Ctrl MO N-C	Non Clone- Clone	h7b3	10.699	309.09	92.69	955.702	17.308
Ctrl MO N-C	Non Clone- Clone	h7b3	10.699	315.055	99.852	976.397	17.308
Ctrl MO N-C	Non Clone- Clone	h7b3	10.699	321.759	102.592	913.662	17.308
Ctrl MO N-C	Non Clone- Clone	h7b3	10.699	332.978	97.851	903.66	17.308
Ctrl MO N-C	Non Clone- Clone	h7b3	10.699	339.512	101.315	941.296	17.308
Ctrl MO N-C	Non Clone- Clone	h7b3	10.699	339.634	94.156	846.264	17.308
Ctrl MO N-C	Non Clone- Clone	h7b3	10.699	338.456	100.77	804.356	17.308
Ctrl MO N-C	Non Clone- Clone
Ctrl MO N-C	Non Clone- Clone	h7b4	10.05	341.061	116.669	1071.391	16.254
Ctrl MO N-C	Non Clone- Clone	h7b4	10.05	375.323	126.561	895.388	16.254
Ctrl MO N-C	Non Clone- Clone	h7b4	10.05	371.392	125.996	925.178	16.254
Ctrl MO N-C	Non Clone- Clone	h7b4	10.05	364.888	109.358	850.412	16.254
Ctrl MO N-C	Non Clone- Clone	h7b4	10.05	345	116.177	929.16	16.254
Ctrl MO N-C	Non Clone- Clone	h7b4	10.05	332.202	145.575	833.463	16.254
Ctrl MO N-C	Non Clone- Clone	h7b4	10.05	330.625	137.276	875.683	16.254
Ctrl MO N-C	Non Clone- Clone	h7b4	10.05	300.976	129.923	796.845	16.254
Ctrl MO N-C	Non Clone- Clone	h7b4	10.05	292.429	131.087	871.158	16.254
Ctrl MO N-C	Non Clone- Clone
Ctrl MO N-C	Non Clone- Clone	h7b5	10.699	264.074	89.711	819.51	17.308
Ctrl MO N-C	Non Clone- Clone	h7b5	10.699	255.499	97.525	851.811	17.308
Ctrl MO N-C	Non Clone- Clone	h7b5	10.699	257.158	96.781	753.232	17.308
Ctrl MO N-C	Non Clone- Clone	h7b5	10.699	261.32	97.624	843.843	17.308
Ctrl MO N-C	Non Clone- Clone	h7b5	10.699	241.662	97.356	709.961	17.308
Ctrl MO N-C	Non Clone- Clone	h7b5	10.699	235.185	93.818	622.497	17.308
Ctrl MO N-C	Non Clone- Clone	h7b5	10.699	232.127	97.56	544.282	17.308
Ctrl MO N-C	Non Clone- Clone
Ctrl MO N-C	Non Clone- Clone	h7b6	12.752	224.44	101.392	527.265	20.647
Ctrl MO N-C	Non Clone- Clone	h7b6	12.752	243.201	105.859	589.846	20.647
Ctrl MO N-C	Non Clone- Clone	h7b6	12.752	249.188	104.431	652.723	20.647
Ctrl MO N-C	Non Clone- Clone	h7b6	12.752	260.367	108.6	670.078	20.647
Ctrl MO N-C	Non Clone- Clone	h7b6	12.752	267.773	99.551	657.245	20.647
Ctrl MO N-C	Non Clone- Clone
Ctrl MO N-C	Non Clone- Clone	h7b7	7.241	200.907	104.949	405.214	11.685
Ctrl MO N-C	Non Clone- Clone	h7b7	7.241	215.346	116.106	396.004	11.685
Ctrl MO N-C	Non Clone- Clone	h7b7	7.241	228.706	114.258	469.703	11.685
Ctrl MO N-C	Non Clone- Clone	h7b7	7.241	240.216	116.986	556.215	11.685
Ctrl MO N-C	Non Clone- Clone	h7b7	7.241	242.921	118.167	492.057	11.685
Ctrl MO N-C	Non Clone- Clone
Ctrl MO N-C	Non Clone- Clone	h7b8	10.212	221.819	104.058	512.671	16.517
Ctrl MO N-C	Non Clone- Clone	h7b8	10.212	229.861	104.673	518.055	16.517
Ctrl MO N-C	Non Clone- Clone	h7b8	10.212	229.523	106.911	578.9	16.517
Ctrl MO N-C	Non Clone- Clone	h7b8	10.212	221.029	95.88	479.026	16.517
Ctrl MO N-C	Non Clone- Clone	h7b8	10.212	211.532	111.516	421.796	16.517
Ctrl MO N-C	Non Clone- Clone	h7b8	10.212	191.85	104.144	362.854	16.517
Ctrl MO N-C	Non Clone- Clone	h8b3	8.754	153.311	101.631	282.5	14.145
Ctrl MO N-C	Non Clone- Clone	h8b3	8.754	164.369	105.669	288.447	14.145
Ctrl MO N-C	Non Clone- Clone	h8b3	8.754	176.05	104.472	367.555	14.145
Ctrl MO N-C	Non Clone- Clone	h8b3	8.754	191.844	110.804	408.05	14.145
Ctrl MO N-C	Non Clone- Clone	h8b3	8.754	200.552	110.193	423.216	14.145
Ctrl MO N-C	Non Clone- Clone	h8b3	8.754	207.875	112.899	430.141	14.145
Ctrl MO N-C	Non Clone- Clone	h8b3	8.754	212.096	110.4	462.432	14.145
Ctrl MO N-C	Non Clone- Clone	h8b3	8.754	222.007	116.117	448.636	14.145
Ctrl MO N-C	Non Clone- Clone	h8b3	8.754	225.757	119.588	459.264	14.145
Ctrl MO N-C	Non Clone- Clone	h8b3	8.754	230.263	118.864	502.227	14.145
Ctrl MO N-C	Non Clone- Clone
Ctrl MO N-C	Non Clone- Clone	h8b4	8.375	245.584	113.724	509.719	13.53
Ctrl MO N-C	Non Clone- Clone	h8b4	8.375	255.812	110.562	483.322	13.53
Ctrl MO N-C	Non Clone- Clone	h8b4	8.375	259.688	112.605	550.849	13.53
Ctrl MO N-C	Non Clone- Clone	h8b4	8.375	258.783	103.75	549.427	13.53
Ctrl MO N-C	Non Clone- Clone	h8b4	8.375	257.312	125.154	643.203	13.53
Ctrl MO N-C	Non Clone- Clone	h8b4	8.375	254.597	129.235	557.967	13.53
Ctrl MO N-C	Non Clone- Clone	h8b4	8.375	246.472	120.252	562.416	13.53
Ctrl MO N-C	Non Clone- Clone
Ctrl MO N-C	Non Clone- Clone	h8b5	8.375	153.958	101.423	357.615	13.53
Ctrl MO N-C	Non Clone- Clone	h8b5	8.375	161.472	101.016	345.186	13.53
Ctrl MO N-C	Non Clone- Clone	h8b5	8.375	172.144	98.764	349.155	13.53
Ctrl MO N-C	Non Clone- Clone	h8b5	8.375	183.123	102.659	354.932	13.53
Ctrl MO N-C	Non Clone- Clone	h8b5	8.375	200.32	110.666	419.57	13.53
Ctrl MO N-C	Non Clone- Clone	h8b5	8.375	207.71	107.566	511.455	13.53
Ctrl MO N-C	Non Clone- Clone	h8b5	8.375	215.506	117.039	478.033	13.53
Ctrl MO N-C	Non Clone- Clone	h8b5	8.375	228.736	116.33	481.582	13.53
Ctrl MO N-C	Non Clone- Clone
Ctrl MO N-C	Non Clone- Clone	h8b6	10.483	345.159	101.301	808.699	16.955
Ctrl MO N-C	Non Clone- Clone	h8b6	10.483	333.916	103.624	836.855	16.955
Ctrl MO N-C	Non Clone- Clone	h8b6	10.483	315.232	101.447	841.789	16.955
Ctrl MO N-C	Non Clone- Clone	h8b6	10.483	296.092	108.249	840.482	16.955
Ctrl MO N-C	Non Clone- Clone	h8b6	10.483	272.047	104.885	750.701	16.955
Ctrl MO N-C	Non Clone- Clone	h8b6	10.483	255.557	113.474	789.812	16.955
Ctrl MO N-C	Non Clone- Clone	h9b1	8.375	408.207	153.413	854.407	13.53
Ctrl MO N-C	Non Clone- Clone	h9b1	8.375	481.551	135.4	1096.744	13.53
Ctrl MO N-C	Non Clone- Clone	h9b1	8.375	496.56	134.823	1088.982	13.53
Ctrl MO N-C	Non Clone- Clone	h9b1	8.375	490.053	129.233	1077.944	13.53
Ctrl MO N-C	Non Clone- Clone	h9b1	8.375	470.44	145.29	1005.218	13.53
Ctrl MO N-C	Non Clone- Clone	h9b1	8.375	438.806	131.14	1037.538	13.53
Ctrl MO N-C	Non Clone- Clone	h9b1	8.375	410.018	132.279	1015.262	13.53
Ctrl MO N-C	Non Clone- Clone	h9b1	8.375	377.939	132.574	952.803	13.53
Ctrl MO N-C	Non Clone- Clone	h9b1	8.375	339.533	117.472	843.872	13.53
Ctrl MO N-C	Non Clone- Clone	h9b1	8.375	320.04	112.002	854.25	13.53
Ctrl MO N-C	Non Clone- Clone	h9b1	8.375	295.723	114.874	748.186	13.53
Ctrl MO N-C	Non Clone- Clone	h9b1	8.375	284.21	104.335	740.837	13.53
Ctrl MO N-C	Non Clone- Clone
Ctrl MO N-C	Non Clone- Clone	h9b2	16.318	379.616	121.584	1010.212	26.445
Ctrl MO N-C	Non Clone- Clone	h9b2	16.318	364.286	121.12	938.86	26.445
Ctrl MO N-C	Non Clone- Clone	h9b2	16.318	345.111	115.347	841.572	26.445
Ctrl MO N-C	Non Clone- Clone	h9b2	16.156	366.672	108.974	851.738	26.182
Ctrl MO N-C	Non Clone- Clone	h9b2	16.156	351.969	132.785	839.844	26.182
Ctrl MO N-C	Non Clone- Clone	h9b2	16.156	301.645	129.209	657.321	26.182
Ctrl MO N-C	Non Clone- Clone	h9b2	16.156	277.704	106.669	585.917	26.182
Ctrl MO N-C	Non Clone- Clone	h9b2	16.156	262.324	113.985	570.948	26.182
Ctrl MO N-C	Non Clone- Clone	h9b2	16.156	248.656	120.368	519.386	26.182
Ctrl MO N-C	Non Clone- Clone	h9b2	16.48	275.657	125.785	693.078	26.709
Ctrl MO N-C	Non Clone- Clone	h9b2	16.48	258.475	114.066	667.946	26.709
Ctrl MO N-C	Non Clone- Clone	h9b2	16.48	237.329	108.166	600.428	26.709
Ctrl MO N-C	Non Clone- Clone	h9b2	16.48	211.821	106.145	692.789	26.709
Ctrl MO N-C	Non Clone- Clone
Ctrl MO N-C	Non Clone- Clone	h9b3	6.7	362.898	131.674	895.5	10.807
Ctrl MO N-C	Non Clone- Clone	h9b3	6.7	393.979	139.942	932.086	10.807
Ctrl MO N-C	Non Clone- Clone	h9b3	6.7	421.406	157.641	950.4	10.807
Ctrl MO N-C	Non Clone- Clone	h9b3	6.7	444.515	158.447	921.061	10.807
Ctrl MO N-C	Non Clone- Clone	h9b3	6.7	474.082	169.772	911.165	10.807
Ctrl MO N-C	Non Clone- Clone	h9b3	6.7	487.475	176.324	932.518	10.807
Ctrl MO N-C	Non Clone- Clone	h9b3	6.7	484.156	158.86	933.691	10.807
Ctrl MO N-C	Non Clone- Clone	h9b3	6.7	487.043	152.939	943.79	10.807
Ctrl MO N-C	Non Clone- Clone	h9b3	6.7	453.239	148.681	912.313	10.807
Ctrl MO N-C	Non Clone- Clone	h9b3	6.7	417.681	132.074	921.628	10.807
Ctrl MO N-C	Non Clone- Clone
Ctrl MO N-C	Non Clone- Clone	h9b4	12.536	491.564	158.003	1149.232	20.295
Ctrl MO N-C	Non Clone- Clone	h9b4	12.536	526.483	205.944	1043.128	20.295
Ctrl MO N-C	Non Clone- Clone	h9b4	12.536	488.247	174.879	954.868	20.295
Ctrl MO N-C	Non Clone- Clone	h9b4	12.536	443.721	156.564	843.247	20.295
Ctrl MO N-C	Non Clone- Clone	h9b4	12.536	386.811	172.848	772.608	20.295
Ctrl MO N-C	Non Clone- Clone	h9b4	12.536	329.923	167.222	732.744	20.295
[truncated: 1,197 more rows]
