# Supplementary material for: Stepwise polarisation of developing bilayered epidermis is mediated by aPKC and E-cadherin in zebrafish
Source: eLife. 2020 Jan 22;9:e49064. doi: 10.7554/eLife.49064 (PMC6975926; doi:10.7554/eLife.49064)
Supplement: Figure 5—source data 2. [file elife-49064-fig5-data2.csv]

Genotype	Boundary	Cell name	Area	Mean	Min	Max	Length
Ctrl MO CO	Complete Overlap	h1b1	9.348	704.144	171.594	3253.401	15.112
Ctrl MO CO	Complete Overlap	h1b1	9.348	640.616	95.543	2912.744	15.112
Ctrl MO CO	Complete Overlap	h1b1	9.348	534.21	131.006	2078.634	15.112
Ctrl MO CO	Complete Overlap	h1b1	9.348	432.701	94.457	2261.401	15.112
Ctrl MO CO	Complete Overlap	h1b1	8.213	561.749	154.598	2023.293	13.267
Ctrl MO CO	Complete Overlap	h1b1	8.213	438.282	104.007	1800.135	13.267
Ctrl MO CO	Complete Overlap	h1b1	8.213	470.113	69.847	2210.385	13.267
Ctrl MO CO	Complete Overlap
Ctrl MO CO	Complete Overlap	h1b2	8.213	561.749	154.598	2023.293	13.267
Ctrl MO CO	Complete Overlap	h1b2	8.213	438.282	104.007	1800.135	13.267
Ctrl MO CO	Complete Overlap	h1b2	8.213	470.113	69.847	2210.385	13.267
Ctrl MO CO	Complete Overlap
Ctrl MO CO	Complete Overlap	h1b3	6.052	525.754	181.817	3150.258	9.752
Ctrl MO CO	Complete Overlap	h1b3	6.052	616.955	216.289	1721.953	9.752
Ctrl MO CO	Complete Overlap	h1b3	6.052	548.011	193.162	2064.985	9.752
Ctrl MO CO	Complete Overlap	h1b3	6.052	437.265	139.517	1513.103	9.752
Ctrl MO CO	Complete Overlap	h1b3	6.052	362.847	94.112	853.418	9.752
Ctrl MO CO	Complete Overlap
Ctrl MO CO	Complete Overlap	h1b4	7.619	946.928	204.295	3657.897	12.3
Ctrl MO CO	Complete Overlap	h1b4	7.619	672.636	149.99	2369.386	12.3
Ctrl MO CO	Complete Overlap	h1b4	7.619	506.938	81.587	1627.745	12.3
Ctrl MO CO	Complete Overlap	h1b4	7.619	367.501	77.383	1047.017	12.3
Ctrl MO CO	Complete Overlap	h1b4	4.701	546.12	76.979	2205.612	7.556
Ctrl MO CO	Complete Overlap	h1b4	4.701	433.872	87.313	1695.685	7.556
Ctrl MO CO	Complete Overlap	h1b4	4.701	284.392	45.619	811.229	7.556
Ctrl MO CO	Complete Overlap	h1b4	4.701	182.997	9.191	822.195	7.556
Ctrl MO CO	Complete Overlap
Ctrl MO CO	Complete Overlap	h1b5	8.375	637.876	93.539	2887.615	13.53
Ctrl MO CO	Complete Overlap	h1b5	8.375	563.421	53.263	1867.686	13.53
Ctrl MO CO	Complete Overlap	h1b5	8.375	468.022	61.691	2069.599	13.53
Ctrl MO CO	Complete Overlap	h1b5	8.375	384.335	43.557	1573.517	13.53
Ctrl MO CO	Complete Overlap	h1b5	8.375	292.679	37.139	1455.343	13.53
Ctrl MO CO	Complete Overlap	h1b5	8.375	190.325	29.435	617.799	13.53
Ctrl MO CO	Complete Overlap
Ctrl MO CO	Complete Overlap	h1b6	9.24	509.978	56.136	2304.395	14.936
Ctrl MO CO	Complete Overlap	h1b6	9.24	403.306	52.266	1602.321	14.936
Ctrl MO CO	Complete Overlap	h1b6	9.24	321.997	26.527	1310.742	14.936
Ctrl MO CO	Complete Overlap	h1b6	9.24	278.971	6.046	1144.367	14.936
Ctrl MO CO	Complete Overlap	h1b6	9.24	220.792	18.435	1038.238	14.936
Ctrl MO CO	Complete Overlap	h1b6	9.24	172.689	0.888	1166.508	14.936
Ctrl MO CO	Complete Overlap
Ctrl MO CO	Complete Overlap	h1b7	7.078	828.709	193.798	2374.831	11.422
Ctrl MO CO	Complete Overlap	h1b7	7.078	572.954	103.088	1980.893	11.422
Ctrl MO CO	Complete Overlap	h1b7	7.078	315.306	36.482	1465.848	11.422
Ctrl MO CO	Complete Overlap	h1b7	7.078	244.739	29.153	1098.112	11.422
Ctrl MO CO	Complete Overlap	h1b7	7.078	188.901	11.564	858.386	11.422
Ctrl MO CO	Complete Overlap
Ctrl MO CO	Complete Overlap	h1b8	8.591	1468.754	155.452	4095	13.882
Ctrl MO CO	Complete Overlap	h1b8	8.591	930.872	100.488	3560.636	13.882
Ctrl MO CO	Complete Overlap	h1b8	8.591	367.339	55.52	1100.09	13.882
Ctrl MO CO	Complete Overlap	h1b8	8.591	252.248	6.865	880.438	13.882
Ctrl MO CO	Complete Overlap	h1b8	8.591	187.172	11.657	982.672	13.882
Ctrl MO CO	Complete Overlap
Ctrl MO CO	Complete Overlap	h1b9	8.483	949.589	173.321	3906.235	13.706
Ctrl MO CO	Complete Overlap	h1b9	8.483	653.249	108.596	3372.629	13.706
Ctrl MO CO	Complete Overlap	h1b9	8.483	292.572	42.228	1347.303	13.706
Ctrl MO CO	Complete Overlap	h1b9	8.483	207.654	14.564	667.99	13.706
Ctrl MO CO	Complete Overlap	h1b9	8.483	154.263	9.355	455.795	13.706
Ctrl MO CO	Complete Overlap
Ctrl MO CO	Complete Overlap	h1b10	7.511	1429.91	265.349	3576.676	12.125
Ctrl MO CO	Complete Overlap	h1b10	7.511	731.618	145.719	1818.957	12.125
Ctrl MO CO	Complete Overlap	h1b10	7.511	533.556	149.513	1437.734	12.125
Ctrl MO CO	Complete Overlap	h1b10	7.511	413.2	87.824	1229.876	12.125
Ctrl MO CO	Complete Overlap
Ctrl MO CO	Complete Overlap	h1b11	4.917	345.921	131.843	1025.735	7.907
Ctrl MO CO	Complete Overlap	h1b11	4.917	254.65	78.486	1342.869	7.907
Ctrl MO CO	Complete Overlap	h1b11	4.917	196.367	48.695	1038.994	7.907
Ctrl MO CO	Complete Overlap	h1b11	4.917	153.113	30.933	445.644	7.907
Ctrl MO CO	Complete Overlap
Ctrl MO CO	Complete Overlap	h1b12	2.702	589.22	184.942	1562.419	4.305
Ctrl MO CO	Complete Overlap	h1b12	2.702	339.129	125.581	706.091	4.305
Ctrl MO CO	Complete Overlap	h1b12	2.702	242.029	57.258	581.596	4.305
Ctrl MO CO	Complete Overlap	h1b12	2.702	186.296	64.014	381.226	4.305
Ctrl MO CO	Complete Overlap
Ctrl MO CO	Complete Overlap	h1b13	3.188	1082.105	131.764	4041.115	5.096
Ctrl MO CO	Complete Overlap	h1b13	3.188	602.963	44.552	2489.701	5.096
Ctrl MO CO	Complete Overlap	h1b13	3.188	410.188	48.836	1486.68	5.096
Ctrl MO CO	Complete Overlap
Ctrl MO CO	Complete Overlap	h1b14	9.726	894.888	164.223	4095	15.727
Ctrl MO CO	Complete Overlap	h1b14	9.726	895.682	141.929	4095	15.727
Ctrl MO CO	Complete Overlap	h1b14	9.726	774.899	95.175	4095	15.727
Ctrl MO CO	Complete Overlap	h1b14	9.726	497.781	45.545	2210.426	15.727
Ctrl MO CO	Complete Overlap	h1b14	9.726	304.1	39.679	1371.583	15.727
Ctrl MO CO	Complete Overlap
Ctrl MO CO	Complete Overlap	h1b15	10.861	776.552	98.708	3055.468	17.572
Ctrl MO CO	Complete Overlap	h1b15	10.861	622.736	114.781	1521.752	17.572
Ctrl MO CO	Complete Overlap	h1b15	10.861	476.977	88.623	2123.805	17.572
Ctrl MO CO	Complete Overlap	h1b15	10.861	335.742	88.203	2161.517	17.572
Ctrl MO CO	Complete Overlap	h1b15	10.861	297.671	64.224	1396.721	17.572
Ctrl MO CO	Complete Overlap
Ctrl MO CO	Complete Overlap	h1b16	5.241	737.181	172.279	1922.916	8.434
Ctrl MO CO	Complete Overlap	h1b16	5.241	444.936	119.376	1217.435	8.434
Ctrl MO CO	Complete Overlap	h1b16	5.241	414.391	116.201	2199.913	8.434
Ctrl MO CO	Complete Overlap	h1b16	5.241	429.443	91.535	3565.539	8.434
Ctrl MO CO	Complete Overlap	h1b16	5.241	429.564	93.407	2102.77	8.434
Ctrl MO CO	Complete Overlap
Ctrl MO CO	Complete Overlap	h1b17	12.752	631.276	77.174	2486.924	20.647
Ctrl MO CO	Complete Overlap	h1b17	12.752	441.951	41.333	2270.752	20.647
Ctrl MO CO	Complete Overlap	h1b17	12.752	368.134	22.23	1635.509	20.647
Ctrl MO CO	Complete Overlap	h1b17	12.752	333.827	34.359	2297.046	20.647
Ctrl MO CO	Complete Overlap	h1b17	12.752	290.602	2.671	4073.135	20.647
Ctrl MO CO	Complete Overlap	h1b17	12.752	258.5	3.191	2215.444	20.647
Ctrl MO CO	Complete Overlap
Ctrl MO CO	Complete Overlap	h1b18	7.403	739.556	136.349	3602.067	11.949
Ctrl MO CO	Complete Overlap	h1b18	7.403	482.945	83.727	1412.656	11.949
Ctrl MO CO	Complete Overlap	h1b18	7.403	353.356	69.841	1134.187	11.949
Ctrl MO CO	Complete Overlap	h1b18	7.403	274.436	22.511	1067.629	11.949
Ctrl MO CO	Complete Overlap
Ctrl MO CO	Complete Overlap	h1b19	8.645	1237.679	51.921	4095	13.97
Ctrl MO CO	Complete Overlap	h1b19	8.645	971.952	83.617	3034.951	13.97
Ctrl MO CO	Complete Overlap	h1b19	8.645	773.22	111.287	2329.389	13.97
Ctrl MO CO	Complete Overlap	h1b19	8.645	633.626	99.711	3224.356	13.97
Ctrl MO CO	Complete Overlap	h1b19	8.645	565.258	120.999	2959.777	13.97
Ctrl MO CO	Complete Overlap	h1b19	8.645	540.523	53.541	3880.782	13.97
Ctrl MO CO	Complete Overlap
Ctrl MO CO	Complete Overlap	h1b20	5.457	1088.882	227.361	3605.517	8.768
Ctrl MO CO	Complete Overlap	h1b20	5.457	959.479	226.093	3339.187	8.768
Ctrl MO CO	Complete Overlap	h1b20	5.457	651.917	192.849	1726.825	8.768
Ctrl MO CO	Complete Overlap	h1b20	5.457	369.671	105.357	1231.41	8.768
Ctrl MO CO	Complete Overlap	h1b20	5.457	294.419	63.109	2494.381	8.768
Ctrl MO CO	Complete Overlap	h2b1	9.726	490.542	61.961	3358.8	15.726
Ctrl MO CO	Complete Overlap	h2b1	9.726	242.627	53.515	832.898	15.726
Ctrl MO CO	Complete Overlap	h2b1	9.726	165.166	10.391	771.32	15.726
Ctrl MO CO	Complete Overlap	h2b1	9.726	143.06	4.241	1187.453	15.726
Ctrl MO CO	Complete Overlap
Ctrl MO CO	Complete Overlap	h2b2	9.078	527.128	57.934	2262.42	14.672
Ctrl MO CO	Complete Overlap	h2b2	9.078	491.471	66.527	2401.11	14.672
Ctrl MO CO	Complete Overlap	h2b2	9.078	403.279	80.451	1259.176	14.672
Ctrl MO CO	Complete Overlap	h2b2	9.078	284.279	41.304	1022.658	14.672
Ctrl MO CO	Complete Overlap	h2b2	9.078	257.936	25.325	1116.443	14.672
Ctrl MO CO	Complete Overlap
Ctrl MO CO	Complete Overlap	h2b3	14.805	632.366	72.853	3054.515	23.985
Ctrl MO CO	Complete Overlap	h2b3	14.805	546.841	68.499	3054.106	23.985
Ctrl MO CO	Complete Overlap	h2b3	14.805	479.053	49.622	3349.373	23.985
Ctrl MO CO	Complete Overlap	h2b3	14.805	441.79	39.328	3744.181	23.985
Ctrl MO CO	Complete Overlap	h2b3	14.805	412.353	50.505	2527.753	23.985
Ctrl MO CO	Complete Overlap
Ctrl MO CO	Complete Overlap	h2b4	13.671	671.1	125.172	3406.852	22.14
Ctrl MO CO	Complete Overlap	h2b4	13.671	493.663	104.942	2815.111	22.14
Ctrl MO CO	Complete Overlap	h2b4	13.671	390.244	76.309	1551.323	22.14
Ctrl MO CO	Complete Overlap	h2b4	13.671	315	24.578	1249.615	22.14
Ctrl MO CO	Complete Overlap
Ctrl MO CO	Complete Overlap	h2b5	5.457	609.272	185.355	1673.46	8.786
Ctrl MO CO	Complete Overlap	h2b5	5.457	398.092	55.433	1647.535	8.786
Ctrl MO CO	Complete Overlap	h2b5	5.457	322.406	100.947	1094.491	8.786
Ctrl MO CO	Complete Overlap	h2b5	5.457	329.539	78.171	933.498	8.786
Ctrl MO CO	Complete Overlap
Ctrl MO CO	Complete Overlap	h2b6	7.078	874.799	89.679	2577.795	11.42
Ctrl MO CO	Complete Overlap	h2b6	7.078	739.534	105.307	2576.966	11.42
Ctrl MO CO	Complete Overlap	h2b6	7.078	568.873	107.696	1898.284	11.42
Ctrl MO CO	Complete Overlap	h2b6	7.078	405.29	128.059	1561.675	11.42
Ctrl MO CO	Complete Overlap	h3b1	7.078	809.75	179.583	3869.416	11.422
Ctrl MO CO	Complete Overlap	h3b1	7.078	685.048	116.292	3211.91	11.422
Ctrl MO CO	Complete Overlap	h3b1	7.078	519.108	129.49	2105.908	11.422
Ctrl MO CO	Complete Overlap	h3b1	7.078	551.676	103.948	2239.8	11.422
Ctrl MO CO	Complete Overlap
Ctrl MO CO	Complete Overlap	h3b2	7.349	630.979	83.255	2178.469	11.861
Ctrl MO CO	Complete Overlap	h3b2	7.349	593.537	111.735	1917.057	11.861
Ctrl MO CO	Complete Overlap	h3b2	7.349	365.948	70.643	1303.929	11.861
Ctrl MO CO	Complete Overlap	h3b2	7.349	353.251	35.459	2315.509	11.861
Ctrl MO CO	Complete Overlap
Ctrl MO CO	Complete Overlap	h3b3	4.863	595.548	160.738	2424.72	7.819
Ctrl MO CO	Complete Overlap	h3b3	4.863	472.92	132.832	2815.969	7.819
Ctrl MO CO	Complete Overlap	h3b3	4.863	502.631	106.836	2365.56	7.819
Ctrl MO CO	Complete Overlap	h3b3	4.863	508.755	89.916	2479.188	7.819
Ctrl MO CO	Complete Overlap
Ctrl MO CO	Complete Overlap	h3b4	5.133	993.995	191.999	3728.188	8.259
Ctrl MO CO	Complete Overlap	h3b4	5.133	561.866	117.867	1716.975	8.259
Ctrl MO CO	Complete Overlap	h3b4	5.133	467.908	88.434	2478.099	8.259
Ctrl MO CO	Complete Overlap
Ctrl MO CO	Complete Overlap	h3b5	15.184	713.212	42.552	4093.588	24.6
Ctrl MO CO	Complete Overlap	h3b5	15.184	759.15	38.045	3645.012	24.6
Ctrl MO CO	Complete Overlap	h3b5	15.184	586.849	63.714	2508.722	24.6
Ctrl MO CO	Complete Overlap	h3b5	15.184	449.231	27.567	4008.932	24.6
Ctrl MO CO	Complete Overlap	h3b5	15.184	387.482	54.222	4012.177	24.6
Ctrl MO CO	Complete Overlap
Ctrl MO CO	Complete Overlap	h3b6	8.267	588.341	29.933	2636.8	13.355
Ctrl MO CO	Complete Overlap	h3b6	8.267	560.346	117.147	3206.176	13.355
Ctrl MO CO	Complete Overlap	h3b6	8.267	542.792	101.622	3005.74	13.355
Ctrl MO CO	Complete Overlap	h3b6	8.267	636.048	80.118	2901.072	13.355
Ctrl MO CO	Complete Overlap
Ctrl MO CO	Complete Overlap	h3b7	10.969	534.94	35.706	2308.339	17.747
Ctrl MO CO	Complete Overlap	h3b7	10.969	539.067	31.183	2211.804	17.747
Ctrl MO CO	Complete Overlap	h3b7	10.969	501.059	16.725	3550.844	17.747
Ctrl MO CO	Complete Overlap	h3b7	10.969	380.307	40.52	2875.463	17.747
Ctrl MO CO	Complete Overlap	h3b7	10.969	227.54	15.358	1242.382	17.747
Ctrl MO CO	Complete Overlap
Ctrl MO CO	Complete Overlap	h3b8	6.97	428.427	61.078	1511.774	11.246
Ctrl MO CO	Complete Overlap	h3b8	6.97	482.129	54.366	1650.172	11.246
Ctrl MO CO	Complete Overlap	h3b8	6.97	453.77	59.567	2577.884	11.246
Ctrl MO CO	Complete Overlap	h3b8	6.97	282.128	17.696	892.802	11.246
Ctrl MO CO	Complete Overlap	h3b8	6.97	217.368	32.116	1143.125	11.246
Ctrl MO CO	Complete Overlap
Ctrl MO CO	Complete Overlap	h3b9	10.537	695.332	33.992	3708.162	17.045
Ctrl MO CO	Complete Overlap	h3b9	10.537	499.135	100.633	1597.883	17.045
Ctrl MO CO	Complete Overlap	h3b9	10.537	332.346	68.868	1460.902	17.045
Ctrl MO CO	Complete Overlap	h3b9	10.537	333.139	31.746	1103.793	17.045
Ctrl MO CO	Complete Overlap
Ctrl MO CO	Complete Overlap	h3b10	11.347	494.924	55.693	2123.815	18.362
Ctrl MO CO	Complete Overlap	h3b10	11.347	482.181	81.121	2117.887	18.362
Ctrl MO CO	Complete Overlap	h3b10	11.347	367.809	66.163	1737.698	18.362
Ctrl MO CO	Complete Overlap	h3b10	11.347	354.271	60.106	1261.074	18.362
Ctrl MO CO	Complete Overlap
Ctrl MO CO	Complete Overlap	h3b11	9.294	650.622	51.369	2063.831	15.024
Ctrl MO CO	Complete Overlap	h3b11	9.294	643.254	60.119	3235.679	15.024
Ctrl MO CO	Complete Overlap	h3b11	9.294	392.396	42.613	2183.78	15.024
Ctrl MO CO	Complete Overlap	h3b11	9.294	276.757	36.97	791.141	15.024
Ctrl MO CO	Complete Overlap
Ctrl MO CO	Complete Overlap	h4b1	7.673	938.794	293.98	2008.578	12.388
Ctrl MO CO	Complete Overlap	h4b1	7.673	767.79	242.11	2318.414	12.388
Ctrl MO CO	Complete Overlap	h4b1	7.673	637.893	214.642	2782.691	12.388
Ctrl MO CO	Complete Overlap	h4b1	7.673	573.244	112.096	3765.612	12.388
Ctrl MO CO	Complete Overlap	h4b1	7.673	502.696	143.415	2388.525	12.388
Ctrl MO CO	Complete Overlap	h4b1	7.673	439.091	121.197	1138.359	12.388
Ctrl MO CO	Complete Overlap
Ctrl MO CO	Complete Overlap	h4b2	10.375	863.807	249.285	4051.358	16.778
Ctrl MO CO	Complete Overlap	h4b2	10.375	720.979	167.038	4022.388	16.778
Ctrl MO CO	Complete Overlap	h4b2	10.375	599.75	114.768	3306.323	16.778
Ctrl MO CO	Complete Overlap	h4b2	10.375	508.659	47.752	3704.105	16.778
Ctrl MO CO	Complete Overlap	h4b2	10.375	408.434	27.761	1733.592	16.778
Ctrl MO CO	Complete Overlap	h4b2	10.375	359.649	39.246	1281.174	16.778
Ctrl MO CO	Complete Overlap
Ctrl MO CO	Complete Overlap	h4b3	8.321	1319.843	364.524	3404.571	13.442
Ctrl MO CO	Complete Overlap	h4b3	8.321	901.945	278.176	2739.667	13.442
Ctrl MO CO	Complete Overlap	h4b3	8.321	736.255	211.274	1930.718	13.442
Ctrl MO CO	Complete Overlap	h4b3	8.321	621.289	161.128	1868.943	13.442
Ctrl MO CO	Complete Overlap	h4b3	8.321	570.14	108.145	2020.616	13.442
Ctrl MO CO	Complete Overlap	h4b3	8.321	486.722	108.727	1896.574	13.442
Ctrl MO CO	Complete Overlap	h4b3	8.321	430.593	101.368	1487.212	13.442
Ctrl MO CO	Complete Overlap
Ctrl MO CO	Complete Overlap	h4b4	9.078	1191.254	416.564	3612.023	14.672
Ctrl MO CO	Complete Overlap	h4b4	9.078	1084.456	247.483	4038.974	14.672
Ctrl MO CO	Complete Overlap	h4b4	9.078	988.754	155.232	3586.388	14.672
Ctrl MO CO	Complete Overlap	h4b4	9.078	866.746	98.54	2711.711	14.672
Ctrl MO CO	Complete Overlap	h4b4	9.078	716.203	123.658	1967.379	14.672
Ctrl MO CO	Complete Overlap	h4b4	9.078	507.344	77.292	4056.518	14.672
Ctrl MO CO	Complete Overlap	h4b4	9.078	469.879	102.253	3825.135	14.672
Ctrl MO CO	Complete Overlap
Ctrl MO CO	Complete Overlap	h4b5	5.079	572.465	110.656	1405.895	8.171
Ctrl MO CO	Complete Overlap	h4b5	5.079	467.911	105.374	1488.821	8.171
Ctrl MO CO	Complete Overlap	h4b5	5.079	403.928	78.083	1701.803	8.171
Ctrl MO CO	Complete Overlap	h4b5	5.079	382.487	51.729	1331.116	8.171
Ctrl MO CO	Complete Overlap	h4b5	5.079	358.719	21.752	1739.155	8.171
Ctrl MO CO	Complete Overlap	h4b5	5.079	300.731	33.128	1330.876	8.171
Ctrl MO CO	Complete Overlap	h4b5	5.079	278.656	14.68	1387.774	8.171
Ctrl MO CO	Complete Overlap
Ctrl MO CO	Complete Overlap	h4b6	10.699	957.957	255.51	3715.317	17.301
Ctrl MO CO	Complete Overlap	h4b6	10.699	671.257	179.136	3620.26	17.301
Ctrl MO CO	Complete Overlap	h4b6	10.699	581.688	102.216	4000.514	17.301
Ctrl MO CO	Complete Overlap	h4b6	10.699	533.363	61.674	4092.449	17.301
Ctrl MO CO	Complete Overlap	h4b6	10.699	432.094	55.007	3382.863	17.301
Ctrl MO CO	Complete Overlap
Ctrl MO CO	Complete Overlap	h4b7	8.267	909.369	294.626	1982.489	13.355
Ctrl MO CO	Complete Overlap	h4b7	8.267	749.208	260.305	2206.435	13.355
Ctrl MO CO	Complete Overlap	h4b7	8.267	616.362	166.845	2948.591	13.355
Ctrl MO CO	Complete Overlap	h4b7	8.267	536.579	114.583	3672.625	13.355
Ctrl MO CO	Complete Overlap	h4b7	8.267	468.085	137.869	1533.809	13.355
Ctrl MO CO	Complete Overlap	h4b7	8.267	419.41	73.772	1112.281	13.355
Ctrl MO CO	Complete Overlap
Ctrl MO CO	Complete Overlap	h4b8	10.753	1317.369	262.466	4089.97	17.395
Ctrl MO CO	Complete Overlap	h4b8	10.753	1206.621	195.277	3943.154	17.395
Ctrl MO CO	Complete Overlap	h4b8	10.753	963.206	196.095	3211.992	17.395
Ctrl MO CO	Complete Overlap	h4b8	10.753	504.421	138.279	1325.281	17.395
Ctrl MO CO	Complete Overlap	h4b8	10.753	233.378	37.505	738.87	17.395
Ctrl MO CO	Complete Overlap
Ctrl MO CO	Complete Overlap	h4b9	8.321	950.917	215.603	2727.795	13.442
Ctrl MO CO	Complete Overlap	h4b9	8.321	943.163	143.296	2899.93	13.442
Ctrl MO CO	Complete Overlap	h4b9	8.321	702.646	129.329	2108.76	13.442
Ctrl MO CO	Complete Overlap	h4b9	8.321	363.099	86.875	1065.899	13.442
Ctrl MO CO	Complete Overlap	h4b9	8.321	200.094	43.319	867.11	13.442
Ctrl MO CO	Complete Overlap	h4b9	8.321	170.815	15.64	570.677	13.442
Ctrl MO CO	Complete Overlap
Ctrl MO CO	Complete Overlap	h4b10	8.159	578.369	102.047	3212.842	13.179
Ctrl MO CO	Complete Overlap	h4b10	8.159	451.438	77.206	4013.778	13.179
Ctrl MO CO	Complete Overlap	h4b10	8.159	352.732	70.15	1986.301	13.179
Ctrl MO CO	Complete Overlap	h4b10	8.159	352.993	52.74	1254.621	13.179
Ctrl MO CO	Complete Overlap	h4b10	8.159	415.408	37.944	2888.469	13.179
Ctrl MO CO	Complete Overlap
Ctrl MO CO	Complete Overlap	h4b11	7.349	777.495	124.203	2693.265	11.861
Ctrl MO CO	Complete Overlap	h4b11	7.349	634.908	199.517	1974.323	11.861
Ctrl MO CO	Complete Overlap	h4b11	7.349	532.334	128.118	3361.059	11.861
Ctrl MO CO	Complete Overlap	h4b11	7.349	446.981	77.67	3497.289	11.861
Ctrl MO CO	Complete Overlap	h4b11	7.349	383.869	32.807	2212.887	11.861
Ctrl MO CO	Complete Overlap
Ctrl MO CO	Complete Overlap	h4b12	5.782	548.237	132.737	1749.732	9.313
Ctrl MO CO	Complete Overlap	h4b12	5.782	459.653	121.158	2371.992	9.313
Ctrl MO CO	Complete Overlap	h4b12	5.782	549.122	107.903	4077.655	9.313
Ctrl MO CO	Complete Overlap	h4b12	5.782	564.041	130.883	3931.221	9.313
Ctrl MO PO	Partial Overlap	h1b1	11.185	601.044	146.838	2175.524	18.036
Ctrl MO PO	Partial Overlap	h1b1	11.185	376.854	85.346	1260.398	18.036
Ctrl MO PO	Partial Overlap	h1b1	11.185	368.664	82.252	2606.531	18.036
Ctrl MO PO	Partial Overlap	h1b1	11.185	400.637	69.587	4082.483	18.036
Ctrl MO PO	Partial Overlap
Ctrl MO PO	Partial Overlap	h1b2	9.24	467.126	63.364	1374.822	14.936
Ctrl MO PO	Partial Overlap	h1b2	9.24	284.596	25.383	1789.923	14.936
Ctrl MO PO	Partial Overlap	h1b2	9.24	246.298	17.597	1809.718	14.936
Ctrl MO PO	Partial Overlap
Ctrl MO PO	Partial Overlap	h1b3	8.862	567.891	67.666	2048.526	14.321
Ctrl MO PO	Partial Overlap	h1b3	8.862	403.06	26.726	1359.32	14.321
Ctrl MO PO	Partial Overlap	h1b3	8.862	228.765	20.327	895.121	14.321
Ctrl MO PO	Partial Overlap	h1b3	8.862	187.283	20.195	793.856	14.321
Ctrl MO PO	Partial Overlap
Ctrl MO PO	Partial Overlap	h1b4	10.375	467.803	73.318	1940.13	16.781
Ctrl MO PO	Partial Overlap	h1b4	10.375	324.486	34.058	1614.243	16.781
Ctrl MO PO	Partial Overlap	h1b4	10.375	287.274	18.287	1304.252	16.781
Ctrl MO PO	Partial Overlap	h1b4	10.375	287.049	6.893	1964.682	16.781
Ctrl MO PO	Partial Overlap	h2b1	6.484	541.14	35.577	3348.284	10.455
Ctrl MO PO	Partial Overlap	h2b1	6.484	522.777	27.855	3782.46	10.455
Ctrl MO PO	Partial Overlap	h2b1	6.484	492.954	38.23	3087.292	10.455
Ctrl MO PO	Partial Overlap	h2b1	6.484	429.644	37.594	1461.924	10.455
Ctrl MO PO	Partial Overlap
Ctrl MO PO	Partial Overlap	h2b2	7.349	696.29	134.59	3051.772	11.861
Ctrl MO PO	Partial Overlap	h2b2	7.349	534.88	142.198	1934.492	11.861
Ctrl MO PO	Partial Overlap	h2b2	7.349	395.938	79.975	1962.071	11.861
Ctrl MO PO	Partial Overlap	h2b2	7.349	269.111	54.709	1057.104	11.861
Ctrl MO PO	Partial Overlap
Ctrl MO PO	Partial Overlap	h2b4	11.779	493.863	84.208	2329.051	19.065
Ctrl MO PO	Partial Overlap	h2b4	11.779	454.335	98.044	1768.25	19.065
Ctrl MO PO	Partial Overlap	h2b4	11.779	429.304	63.22	1510.469	19.065
Ctrl MO PO	Partial Overlap	h2b4	11.779	405.55	57.777	2276.666	19.065
Ctrl MO PO	Partial Overlap	h3b1	7.457	542.566	86.35	1809.27	12.037
Ctrl MO PO	Partial Overlap	h3b1	7.457	482.965	86.204	1907.463	12.037
Ctrl MO PO	Partial Overlap	h3b1	8.916	879.88	107.437	3147.015	14.409
Ctrl MO PO	Partial Overlap	h3b1	8.916	488.694	95.904	1726.05	14.409
Ctrl MO PO	Partial Overlap	h3b1	8.916	374.492	60.153	2018.46	14.409
Ctrl MO PO	Partial Overlap
Ctrl MO PO	Partial Overlap	h3b2	6.754	684.43	108.933	3434.294	10.894
Ctrl MO PO	Partial Overlap	h3b2	6.754	644.384	80.067	2461.503	10.894
Ctrl MO PO	Partial Overlap	h3b2	6.754	322.832	30.132	1131.441	10.894
Ctrl MO PO	Partial Overlap	h3b2	6.754	200.632	31.768	712.719	10.894
Ctrl MO PO	Partial Overlap
Ctrl MO PO	Partial Overlap	h3b3	8.267	619.48	97.253	3729.111	13.355
Ctrl MO PO	Partial Overlap	h3b3	8.267	509.643	109.785	3086.258	13.355
Ctrl MO PO	Partial Overlap	h3b3	8.267	477.619	96.269	1916.225	13.355
Ctrl MO PO	Partial Overlap	h3b3	8.267	498.141	44.014	2101.787	13.355
Ctrl MO PO	Partial Overlap
Ctrl MO PO	Partial Overlap	h3b4	11.617	751.085	126.045	3086.624	18.802
Ctrl MO PO	Partial Overlap	h3b4	11.617	721.778	97.744	3398.76	18.802
Ctrl MO PO	Partial Overlap	h3b4	11.617	580.965	60.524	3951.521	18.802
Ctrl MO PO	Partial Overlap	h3b4	11.617	469.727	60.973	4047.44	18.802
Ctrl MO PO	Partial Overlap
Ctrl MO PO	Partial Overlap	h3b5	15.346	818.197	111.333	3840.394	24.864
Ctrl MO PO	Partial Overlap	h3b5	15.346	602.99	112.966	2563.98	24.864
Ctrl MO PO	Partial Overlap	h3b5	15.346	456.029	76.023	3977.226	24.864
Ctrl MO PO	Partial Overlap
Ctrl MO PO	Partial Overlap	h4b1	7.241	744.97	212.574	3759.783	11.685
Ctrl MO PO	Partial Overlap	h4b1	7.241	544.831	78.812	2436.203	11.685
Ctrl MO PO	Partial Overlap	h4b1	7.241	393.626	78.958	1832.34	11.685
Ctrl MO PO	Partial Overlap	h4b1	7.241	356.713	91.292	1445.609	11.685
Ctrl MO PO	Partial Overlap	h4b1	7.241	366.123	105.644	1426.41	11.685
Ctrl MO PO	Partial Overlap
Ctrl MO PO	Partial Overlap	h4b2	5.187	734.369	169.775	2895.54	8.347
Ctrl MO PO	Partial Overlap	h4b2	5.187	449.314	51.982	1888.748	8.347
Ctrl MO PO	Partial Overlap	h4b2	5.187	282.514	18.605	1726.177	8.347
Ctrl MO PO	Partial Overlap
Ctrl MO PO	Partial Overlap	h4b3	11.725	1077.38	140.271	4095	18.974
Ctrl MO PO	Partial Overlap	h4b3	11.725	778.229	116.716	3180.397	18.974
Ctrl MO PO	Partial Overlap	h4b3	11.725	426.431	81.71	1669.73	18.974
Ctrl MO PO	Partial Overlap	h4b3	11.725	323.583	57.475	1043.273	18.974
Ctrl MO PO	Partial Overlap	h4b3	11.725	234.302	28.42	765.131	18.974
Ctrl MO PO	Partial Overlap	h4b3	11.725	173.288	18.702	837.669	18.974
Ctrl MO PO	Partial Overlap
Ctrl MO PO	Partial Overlap	h4b4	10.05	576.651	39.624	3112.829	16.254
Ctrl MO PO	Partial Overlap	h4b4	10.05	369.594	22.526	1866.288	16.254
Ctrl MO PO	Partial Overlap	h4b4	10.05	317.084	10.346	2010.06	16.254
Ctrl MO PO	Partial Overlap	h4b4	10.05	274.815	25.328	1079.231	16.254
Ctrl MO PO	Partial Overlap	h4b4	10.05	262.511	6.078	1518.332	16.254
Ctrl MO PO	Partial Overlap
Ctrl MO PO	Partial Overlap	h4b5	8.267	781.088	54.014	3746.88	13.354
Ctrl MO PO	Partial Overlap	h4b5	8.267	737.195	24.481	2974.635	13.354
Ctrl MO PO	Partial Overlap	h4b5	8.267	646.448	52.367	2943.037	13.354
Ctrl MO PO	Partial Overlap	h4b5	8.267	527.16	45.18	2205.698	13.354
Ctrl MO PO	Partial Overlap	h4b5	8.267	401.228	51.573	1474.024	13.354
Ctrl MO PO	Partial Overlap	h4b5	8.267	330.274	26.679	1628.081	13.354
Ctrl MO PO	Partial Overlap
Ctrl MO PO	Partial Overlap	h4b6	11.131	1154.505	223.707	4095	18.011
Ctrl MO PO	Partial Overlap	h4b6	11.131	859.978	174.009	3388.182	18.011
Ctrl MO PO	Partial Overlap	h4b6	11.131	588.51	113.08	1699.65	18.011
Ctrl MO PO	Partial Overlap	h4b6	11.131	484.352	76.095	1475.649	18.011
Ctrl MO PO	Partial Overlap	h4b6	11.131	419.706	74.51	1358.616	18.011
Ctrl MO PO	Partial Overlap
Ctrl MO PO	Partial Overlap	h4b7	9.294	780.884	125.684	4095	15.021
Ctrl MO PO	Partial Overlap	h4b7	9.294	824.224	84.834	3929.797	15.021
Ctrl MO PO	Partial Overlap	h4b7	9.294	747.966	86.104	4077.052	15.021
Ctrl MO PO	Partial Overlap	h4b7	9.294	597.309	84.531	3049.255	15.021
Ctrl MO PO	Partial Overlap	h4b7	9.294	542.453	101.747	3897.752	15.021
Ctrl MO PO	Partial Overlap
Ctrl MO NO	No Overlap	h1b5	5.133	541.702	124.548	1468.042	8.259
Ctrl MO NO	No Overlap	h1b5	5.133	286.893	57.76	1120.028	8.259
Ctrl MO NO	No Overlap	h1b5	5.133	229.424	29.188	857.989	8.259
Ctrl MO NO	No Overlap	h1b5	5.133	191.071	22.23	726.535	8.259
Ctrl MO NO	No Overlap	h1b5	5.133	133.131	11.197	529.739	8.259
Ctrl MO NO	No Overlap
Ctrl MO NO	No Overlap	h1b6	9.186	578.729	153.716	1987.876	14.848
Ctrl MO NO	No Overlap	h1b6	9.186	501.185	96.357	1946.546	14.848
Ctrl MO NO	No Overlap	h1b6	9.186	427.68	77.919	1311.914	14.848
Ctrl MO NO	No Overlap	h1b6	9.186	373.998	66.398	1393.625	14.848
Ctrl MO NO	No Overlap	h1b6	9.186	358.416	73.358	1210.282	14.848
Ctrl MO NO	No Overlap
Ctrl MO NO	No Overlap	h1b7	8.591	628.177	136.129	1932.473	13.882
Ctrl MO NO	No Overlap	h1b7	8.591	502.662	103.241	2000.934	13.882
Ctrl MO NO	No Overlap	h1b7	8.591	457.014	107.745	4023.85	13.882
Ctrl MO NO	No Overlap	h1b7	8.591	486.42	70.431	3972.039	13.882
Ctrl MO NO	No Overlap	h1b7	8.591	447.65	73.843	3006.183	13.882
Ctrl MO NO	No Overlap	h1b7	8.591	408.568	89.72	1467.849	13.882
Ctrl MO NO	No Overlap	h2b1	11.563	681.734	100.433	3332.632	18.714
Ctrl MO NO	No Overlap	h2b1	11.563	553.522	74.272	2707.219	18.714
Ctrl MO NO	No Overlap	h2b1	11.563	479.045	49.195	2495.381	18.714
Ctrl MO NO	No Overlap	h2b1	11.563	432.26	37.333	2291.732	18.714
Ctrl MO NO	No Overlap	h2b1	11.563	375.753	30.751	1733.872	18.714
Ctrl MO NO	No Overlap
Ctrl MO NO	No Overlap	h2b2	12.86	565.552	39.002	2832.984	20.822
Ctrl MO NO	No Overlap	h2b2	12.86	453.04	65.341	2671.955	20.822
Ctrl MO NO	No Overlap	h2b2	12.86	359.095	37.205	1827.367	20.822
Ctrl MO NO	No Overlap	h2b2	12.86	324.733	33.366	2553.858	20.822
Ctrl MO NO	No Overlap	h2b2	12.86	335.885	36.743	2768.423	20.822
Ctrl MO NO	No Overlap
Ctrl MO NO	No Overlap	h2b3	14.481	544.882	17.387	3994.44	23.458
Ctrl MO NO	No Overlap	h2b3	14.481	457.284	52.432	2106.221	23.458
Ctrl MO NO	No Overlap	h2b3	14.481	371.993	36.973	1879.516	23.458
Ctrl MO NO	No Overlap	h2b3	14.481	318.464	31.177	1768.222	23.458
Ctrl MO NO	No Overlap	h2b3	14.481	289.182	12.257	1342.021	23.458
Ctrl MO NO	No Overlap
Ctrl MO NO	No Overlap	h2b4	9.834	624.786	120.374	2026.237	15.902
Ctrl MO NO	No Overlap	h2b4	9.834	495.682	86.15	1877.125	15.902
Ctrl MO NO	No Overlap	h2b4	9.834	418.063	85.745	2376.156	15.902
Ctrl MO NO	No Overlap	h2b4	9.834	405.212	72.373	2259.537	15.902
Ctrl MO NO	No Overlap	h2b4	9.834	406.857	92.731	1845.798	15.902
Ctrl MO NO	No Overlap	h2b4	9.834	310.296	46.668	1375.613	15.902
Ctrl MO NO	No Overlap
Ctrl MO NO	No Overlap	h2b5	10.969	569.987	73.75	2179.497	17.747
Ctrl MO NO	No Overlap	h2b5	10.969	583.888	93.044	3355.121	17.747
Ctrl MO NO	No Overlap	h2b5	10.969	476.697	46.788	2327.656	17.747
Ctrl MO NO	No Overlap	h2b5	10.969	368.234	32.326	1820.007	17.747
Ctrl MO NO	No Overlap	h2b5	10.969	228.209	16.12	963.814	17.747
Ctrl MO NO	No Overlap	h2b5	10.969	151.87	12.409	482.593	17.747
Ctrl MO NO	No Overlap
Ctrl MO NO	No Overlap	h2b6	6.376	383.212	57.622	2281.913	10.279
Ctrl MO NO	No Overlap	h2b6	6.376	370.035	98.102	1340.863	10.279
Ctrl MO NO	No Overlap	h2b6	6.376	383.623	89.163	1478.641	10.279
Ctrl MO NO	No Overlap	h2b6	6.376	414.148	78.086	2013.102	10.279
Ctrl MO NO	No Overlap	h3b1	11.131	562.685	62.078	3879.55	18.011
Ctrl MO NO	No Overlap	h3b1	11.131	438.331	46.827	3266.498	18.011
Ctrl MO NO	No Overlap	h3b1	11.131	265.32	27.012	1118.573	18.011
Ctrl MO NO	No Overlap	h3b1	11.131	190.868	20.1	591.186	18.011
Ctrl MO NO	No Overlap
Ctrl MO NO	No Overlap	h3b2	9.672	501	51.102	2718.569	15.639
Ctrl MO NO	No Overlap	h3b2	9.672	405.267	35.226	2255.485	15.639
Ctrl MO NO	No Overlap	h3b2	9.672	326.818	16.232	2209.4	15.639
Ctrl MO NO	No Overlap
Ctrl MO NO	No Overlap	h3b3	13.184	556.756	127.158	3007.56	21.347
Ctrl MO NO	No Overlap	h3b3	13.184	460.064	94.392	2368.83	21.347
Ctrl MO NO	No Overlap	h3b3	13.184	423.913	77.393	2578.533	21.347
Ctrl MO NO	No Overlap
Ctrl MO NO	No Overlap	h3b4	6.754	425.356	73.037	1599.445	10.894
Ctrl MO NO	No Overlap	h3b4	6.754	424.918	67.969	2045.341	10.894
Ctrl MO NO	No Overlap	h3b4	6.754	381.325	19.142	1601.437	10.894
Ctrl MO NO	No Overlap
Ctrl MO NO	No Overlap	h3b5	9.78	604.831	93.793	2243.455	15.815
Ctrl MO NO	No Overlap	h3b5	9.78	582.526	91.865	2476.876	15.815
Ctrl MO NO	No Overlap	h3b5	9.78	555.623	88.667	2536.823	15.815
Ctrl MO NO	No Overlap	h3b5	9.78	503.531	60.458	3225.453	15.815
Ctrl MO NO	No Overlap
Ctrl MO NO	No Overlap	h3b6	4.161	609.717	91.536	2440.718	6.677
Ctrl MO NO	No Overlap	h3b6	4.161	569.324	139.143	2761.221	6.677
Ctrl MO NO	No Overlap	h3b6	4.161	554.142	109.894	3804.503	6.677
Ctrl MO NO	No Overlap	h3b6	4.161	554.724	58.984	3956.897	6.677
Ctrl MO NO	No Overlap	h3b6	4.161	380.896	22.124	1290.439	6.677
Ctrl MO NO	No Overlap
Ctrl MO NO	No Overlap
Ctrl MO NO	No Overlap
Ctrl MO NO	No Overlap
Ctrl MO NO	No Overlap
Ctrl MO NO	No Overlap
Ctrl MO NO	No Overlap
Ctrl MO NO	No Overlap
Ctrl MO NO	No Overlap
Ctrl MO NO	No Overlap
Ctrl MO NO	No Overlap
Ctrl MO NO	No Overlap
Ctrl MO NO	No Overlap
Ctrl MO NO	No Overlap
Ctrl MO NO	No Overlap
Ctrl MO NO	No Overlap
Ctrl MO NO	No Overlap
Ctrl MO NO	No Overlap
Ctrl MO NO	No Overlap
Ctrl MO NO	No Overlap
Ctrl MO NO	No Overlap
Ctrl MO NO	No Overlap
Ctrl MO NO	No Overlap
Ctrl MO NO	No Overlap
Ctrl MO NO	No Overlap	h4b1	11.725	662.783	129.802	2605.949	18.977
Ctrl MO NO	No Overlap	h4b1	11.725	657.653	87.816	3563.023	18.977
Ctrl MO NO	No Overlap	h4b1	11.725	657.767	100.833	3387.007	18.977
Ctrl MO NO	No Overlap	h4b1	11.725	602.454	73.347	4095	18.977
Ctrl MO NO	No Overlap	h4b1	11.725	495.901	51.864	4085.638	18.977
Ctrl MO NO	No Overlap	h4b1	11.725	475.037	71.575	2383.676	18.977
Ctrl MO NO	No Overlap
Ctrl MO NO	No Overlap	h4b2	9.078	874.75	163.564	2932.688	14.672
Ctrl MO NO	No Overlap	h4b2	9.078	728.055	139.331	2025.471	14.672
Ctrl MO NO	No Overlap	h4b2	9.078	591.846	77.827	1714.499	14.672
Ctrl MO NO	No Overlap	h4b2	9.078	497.156	74.563	1483.596	14.672
Ctrl MO NO	No Overlap	h4b2	9.078	451.213	71.333	1671.898	14.672
Ctrl MO NO	No Overlap
Ctrl MO NO	No Overlap	h4b3	8.97	837.14	181.784	2963.562	14.497
Ctrl MO NO	No Overlap	h4b3	8.97	792.785	217.328	3046.911	14.497
Ctrl MO NO	No Overlap	h4b3	8.97	741.361	131.419	2023.484	14.497
Ctrl MO NO	No Overlap	h4b3	8.97	674.373	163.535	2219.46	14.497
Ctrl MO NO	No Overlap	h4b3	8.97	579.155	121.729	1885.949	14.497
Ctrl MO NO	No Overlap	h4b3	8.97	447.868	90.858	2775.3	14.497
Ctrl MO NO	No Overlap
Ctrl MO NO	No Overlap	h4b4	10.861	564.923	86.856	2968.572	17.571
Ctrl MO NO	No Overlap	h4b4	10.861	361.549	58.433	1553.55	17.571
Ctrl MO NO	No Overlap	h4b4	10.861	313.948	32.882	1271.24	17.571
Ctrl MO NO	No Overlap	h4b4	10.861	275.605	40.232	1184.934	17.571
Ctrl MO NO	No Overlap	h4b4	10.861	244.121	44.686	774.024	17.571
Ctrl MO NO	No Overlap
Ctrl MO NO	No Overlap	h4b5	6.322	643.409	147.664	1932.562	10.192
Ctrl MO NO	No Overlap	h4b5	6.322	603.303	180.11	2505.991	10.192
Ctrl MO NO	No Overlap	h4b5	6.322	587.724	120.937	4021.594	10.192
Ctrl MO NO	No Overlap	h4b5	6.322	487.657	70.122	2104.983	10.192
Ctrl MO NO	No Overlap	h4b5	6.322	408.15	63.686	1762.721	10.192
Ctrl MO NO	No Overlap	h4b5	6.322	347.908	54.163	1400.922	10.192
Ctrl MO NO	No Overlap
Ctrl MO NO	No Overlap	h4b6	6.484	727.36	113.553	3201.109	10.455
Ctrl MO NO	No Overlap	h4b6	6.484	753.875	164.361	2743.76	10.455
Ctrl MO NO	No Overlap	h4b6	6.484	591.061	129.874	2526.195	10.455
Ctrl MO NO	No Overlap	h4b6	6.484	459.913	97.246	1481.415	10.455
Ctrl MO NO	No Overlap	h4b6	6.484	376.142	84.798	1182.86	10.455
Ctrl MO NO	No Overlap	h4b6	6.484	438.381	62.261	1658.905	10.455
Ctrl MO NO	No Overlap	h4b6	6.484	467.358	59.547	2031.172	10.455
Ecad MO CO	Complete Overlap	h1b1	12.482	1358.412	118.076	4081.19	20.208
Ecad MO CO	Complete Overlap	h1b1	13.022	1290.65	258.452	4056.88	21.086
Ecad MO CO	Complete Overlap	h1b1	13.022	1189.514	241.258	4020.13	21.086
Ecad MO CO	Complete Overlap	h1b1	13.022	785.861	107.946	2547.764	21.086
Ecad MO CO	Complete Overlap	h1b1	13.022	365.198	75.514	1019.227	21.086
Ecad MO CO	Complete Overlap	h1b1	13.022	295.191	35.444	2276.458	21.086
Ecad MO CO	Complete Overlap
Ecad MO CO	Complete Overlap	h1b2	5.187	1801.375	489.411	4074.407	8.347
Ecad MO CO	Complete Overlap	h1b2	5.187	1748.074	461.933	4043.356	8.347
Ecad MO CO	Complete Overlap	h1b2	5.187	1194.126	358.899	3089.769	8.347
Ecad MO CO	Complete Overlap	h1b2	5.187	532.189	166.24	1271.458	8.347
Ecad MO CO	Complete Overlap	h1b2	5.187	286.862	38.557	751.467	8.347
Ecad MO CO	Complete Overlap
Ecad MO CO	Complete Overlap	h1b3	9.888	1264.96	130.385	3854.439	15.99
Ecad MO CO	Complete Overlap	h1b3	9.888	987.319	221.907	3261.448	15.99
Ecad MO CO	Complete Overlap	h1b3	9.888	629.179	118.518	2770.758	15.99
Ecad MO CO	Complete Overlap	h1b3	9.888	495.494	101.642	2648.901	15.99
Ecad MO CO	Complete Overlap
Ecad MO CO	Complete Overlap	h1b4	13.4	1191.075	79.212	3924.205	21.701
Ecad MO CO	Complete Overlap	h1b4	13.4	720.236	197.393	2737.167	21.701
Ecad MO CO	Complete Overlap	h1b4	13.4	446.65	110.028	1645.592	21.701
Ecad MO CO	Complete Overlap	h1b4	13.4	312.127	45.44	1044.832	21.701
Ecad MO CO	Complete Overlap
Ecad MO CO	Complete Overlap	h1b5	12.374	1186.357	257.181	3920.457	20.031
Ecad MO CO	Complete Overlap	h1b5	12.374	1286.734	292.633	4095	20.031
Ecad MO CO	Complete Overlap	h1b5	12.374	1177.786	184.021	3305.986	20.031
Ecad MO CO	Complete Overlap	h1b5	12.374	860.342	116.812	3676.355	20.031
Ecad MO CO	Complete Overlap	h1b5	12.374	507.422	71.926	1564.912	20.031
Ecad MO CO	Complete Overlap	h1b5	12.374	380.662	40.305	2018.843	20.031
Ecad MO CO	Complete Overlap	h1b5	12.374	341.955	27.139	1842.948	20.031
Ecad MO CO	Complete Overlap	h1b5	12.374	330.558	12.836	2408.98	20.031
Ecad MO CO	Complete Overlap
Ecad MO CO	Complete Overlap	h1b6	8.754	1830.12	223.612	4055.81	14.145
Ecad MO CO	Complete Overlap	h1b6	8.754	1761.401	239.031	4037.055	14.145
Ecad MO CO	Complete Overlap	h1b6	8.754	1343.017	390.423	3676.906	14.145
Ecad MO CO	Complete Overlap	h1b6	8.754	1001.306	187.274	2853.16	14.145
Ecad MO CO	Complete Overlap	h1b6	8.754	530.801	143.39	2232.872	14.145
Ecad MO CO	Complete Overlap	h1b6	8.754	395.128	113.404	2649.614	14.145
Ecad MO CO	Complete Overlap
Ecad MO CO	Complete Overlap	h1b7	8.321	1097.589	187.032	3405.897	13.442
Ecad MO CO	Complete Overlap	h1b7	8.321	1029.841	240.903	3338.114	13.442
Ecad MO CO	Complete Overlap	h1b7	8.321	599.081	170.852	1918.368	13.442
Ecad MO CO	Complete Overlap	h1b7	8.321	362.217	102.911	831.198	13.442
Ecad MO CO	Complete Overlap	h1b7	8.321	283.559	81.928	791.476	13.442
Ecad MO CO	Complete Overlap
Ecad MO CO	Complete Overlap	h1b8	10.158	1310.837	267.848	4030.691	16.427
Ecad MO CO	Complete Overlap	h1b8	10.158	1165.653	224.684	3538.896	16.427
Ecad MO CO	Complete Overlap	h1b8	10.158	952.024	156.996	3452.303	16.427
Ecad MO CO	Complete Overlap	h1b8	10.158	721.084	173.194	4078.876	16.427
Ecad MO CO	Complete Overlap	h1b8	10.158	512.259	70.907	2450.135	16.427
Ecad MO CO	Complete Overlap	h1b8	10.158	433.564	71.974	2747.381	16.427
Ecad MO CO	Complete Overlap	h1b8	10.158	405.672	53.939	3386.696	16.427
Ecad MO CO	Complete Overlap
Ecad MO CO	Complete Overlap	h1b9	10.321	1126.327	181.866	4095	16.693
Ecad MO CO	Complete Overlap	h1b9	10.321	1406.286	135.417	4095	16.693
Ecad MO CO	Complete Overlap	h1b9	10.321	1195.645	143.863	4078.81	16.693
Ecad MO CO	Complete Overlap	h1b9	12.158	932.34	191.889	3866.598	19.608
Ecad MO CO	Complete Overlap	h1b9	12.158	618.605	156.204	2187.127	19.608
Ecad MO CO	Complete Overlap	h1b9	12.158	357.248	24.41	1476	19.608
Ecad MO CO	Complete Overlap	h1b9	12.158	297.923	33.651	2097.651	19.608
Ecad MO CO	Complete Overlap	h2b1	9.51	685.365	87.705	3860.382	15.375
Ecad MO CO	Complete Overlap	h2b1	9.51	1017.054	101.424	4095	15.375
Ecad MO CO	Complete Overlap	h2b1	9.51	1026.831	87.083	4095	15.375
Ecad MO CO	Complete Overlap	h2b1	9.51	850.355	100.863	4095	15.375
Ecad MO CO	Complete Overlap	h2b1	9.51	533.047	72.677	4069.917	15.375
Ecad MO CO	Complete Overlap	h2b1	9.51	352.599	29.512	1989.888	15.375
Ecad MO CO	Complete Overlap	h2b1	9.51	309.628	41.399	1407.277	15.375
Ecad MO CO	Complete Overlap
Ecad MO CO	Complete Overlap	h2b2	10.699	648.222	68.561	2700.106	17.308
Ecad MO CO	Complete Overlap	h2b2	10.699	673.966	94.171	2733.417	17.308
Ecad MO CO	Complete Overlap	h2b2	10.699	495.697	74.183	2434.015	17.308
Ecad MO CO	Complete Overlap	h2b2	10.699	325.151	70.282	1552.941	17.308
Ecad MO CO	Complete Overlap	h2b2	10.699	287.513	31.902	1684.109	17.308
Ecad MO CO	Complete Overlap	h2b2	10.699	245.008	8.191	1133.026	17.308
Ecad MO CO	Complete Overlap
Ecad MO CO	Complete Overlap	h2b3	10.429	610.284	55.812	3042.479	16.867
Ecad MO CO	Complete Overlap	h2b3	10.429	702.089	57.561	3963.711	16.867
Ecad MO CO	Complete Overlap	h2b3	10.429	411.736	79.241	3025.207	16.867
Ecad MO CO	Complete Overlap	h2b3	10.429	327.753	72.823	1279.131	16.867
Ecad MO CO	Complete Overlap	h2b3	10.429	265.734	48.205	1379.021	16.867
Ecad MO CO	Complete Overlap	h2b3	10.429	238.898	19.193	1661.571	16.867
Ecad MO CO	Complete Overlap
Ecad MO CO	Complete Overlap	h2b4	10.158	686.689	111.565	2901.819	16.429
Ecad MO CO	Complete Overlap	h2b4	10.158	638.348	49.353	2934.906	16.429
Ecad MO CO	Complete Overlap	h2b4	10.158	545.828	48.742	2040.719	16.429
Ecad MO CO	Complete Overlap	h2b4	10.158	378.506	29.933	1392.088	16.429
Ecad MO CO	Complete Overlap	h2b4	10.158	240.014	32.648	829.052	16.429
Ecad MO CO	Complete Overlap	h2b4	10.158	194.07	14.309	910.933	16.429
Ecad MO CO	Complete Overlap
Ecad MO CO	Complete Overlap	h2b5	16.048	817.81	86.116	3966.367	26.006
Ecad MO CO	Complete Overlap	h2b5	16.048	730.787	105.648	3625.181	26.006
Ecad MO CO	Complete Overlap	h2b5	16.048	581.238	105.14	2495.031	26.006
Ecad MO CO	Complete Overlap	h2b5	16.048	418.202	83.889	2332.296	26.006
Ecad MO CO	Complete Overlap	h2b5	16.048	312.376	45.244	1628.899	26.006
Ecad MO CO	Complete Overlap	h2b5	16.048	286.458	30.677	1288.013	26.006
Ecad MO CO	Complete Overlap	h2b5	16.048	258.414	10.432	1808.603	26.006
Ecad MO CO	Complete Overlap	h2b5	16.048	235.269	1.723	1579.5	26.006
Ecad MO CO	Complete Overlap
Ecad MO CO	Complete Overlap	h2b6	14.643	820.113	105.131	3945.928	23.721
Ecad MO CO	Complete Overlap	h2b6	14.643	635.337	63.853	3766.824	23.721
Ecad MO CO	Complete Overlap	h2b6	14.643	539.734	70.096	2063.057	23.721
Ecad MO CO	Complete Overlap	h2b6	14.643	430.861	44.738	2528.489	23.721
Ecad MO CO	Complete Overlap	h2b6	14.643	331.883	26.317	1784.173	23.721
Ecad MO CO	Complete Overlap	h2b6	14.643	243.966	11.601	1348.438	23.721
Ecad MO CO	Complete Overlap	h2b6	14.643	239.373	3.465	2172.294	23.721
Ecad MO CO	Complete Overlap
Ecad MO CO	Complete Overlap	h2b7	8.267	568.101	83.73	3738.779	13.35
Ecad MO CO	Complete Overlap	h2b7	8.267	549.806	67.253	3965.118	13.35
Ecad MO CO	Complete Overlap	h2b7	8.267	504.5	44.868	3070.306	13.35
Ecad MO CO	Complete Overlap	h2b7	8.267	419.731	36.245	1930.704	13.35
Ecad MO CO	Complete Overlap	h2b7	8.267	348.573	34.935	1576.03	13.35
Ecad MO CO	Complete Overlap	h2b7	8.267	317.52	68.465	1442.909	13.35
Ecad MO CO	Complete Overlap
Ecad MO CO	Complete Overlap	h2b8	12.158	997.94	146.724	3829.186	19.68
Ecad MO CO	Complete Overlap	h2b8	12.158	969.946	150.632	4093.916	19.68
Ecad MO CO	Complete Overlap	h2b8	12.158	907.169	143.6	4073.574	19.68
Ecad MO CO	Complete Overlap	h2b8	12.158	760.261	57.759	3589.403	19.68
Ecad MO CO	Complete Overlap	h2b8	12.158	557.489	93.787	1786.625	19.68
Ecad MO CO	Complete Overlap	h2b8	12.158	473.432	88.902	1713.461	19.68
Ecad MO CO	Complete Overlap	h2b8	12.158	388.368	80.771	2058.661	19.68
Ecad MO CO	Complete Overlap	h2b8	12.158	325.745	74.584	1541.943	19.68
Ecad MO CO	Complete Overlap
Ecad MO CO	Complete Overlap	h2b9	7.457	919.278	76.731	3700.255	12.037
Ecad MO CO	Complete Overlap	h2b9	7.457	959.385	122.617	4095	12.037
Ecad MO CO	Complete Overlap	h2b9	7.457	598.046	135.65	4034.335	12.037
Ecad MO CO	Complete Overlap	h2b9	7.457	512.227	84.261	4058.09	12.037
Ecad MO CO	Complete Overlap	h2b9	7.457	427.557	73.483	3919.003	12.037
Ecad MO CO	Complete Overlap
Ecad MO CO	Complete Overlap	h2b10	8.591	662.929	125.289	4095	13.882
Ecad MO CO	Complete Overlap	h2b10	8.591	693.72	64.683	3755.234	13.882
Ecad MO CO	Complete Overlap	h2b10	8.591	481.458	97.832	1559.211	13.882
Ecad MO CO	Complete Overlap	h2b10	8.591	406.06	63.261	1304.142	13.882
Ecad MO CO	Complete Overlap	h2b10	8.591	333.416	47.146	1500.964	13.882
Ecad MO CO	Complete Overlap
Ecad MO CO	Complete Overlap	h2b11	14.535	951.732	139.295	3961.416	23.545
Ecad MO CO	Complete Overlap	h2b11	14.535	737.625	69.739	4077.93	23.545
Ecad MO CO	Complete Overlap	h2b11	14.535	423.825	66.681	2001.747	23.545
Ecad MO CO	Complete Overlap	h2b11	14.535	369.215	49.501	1710.788	23.545
Ecad MO CO	Complete Overlap	h2b11	14.535	344.442	38.072	1665.053	23.545
Ecad MO CO	Complete Overlap
Ecad MO CO	Complete Overlap	h2b12	12.32	1104.225	87.253	4095	19.944
Ecad MO CO	Complete Overlap	h2b12	12.32	997.371	86.909	4095	19.944
Ecad MO CO	Complete Overlap	h2b12	12.32	827.828	84.167	4095	19.944
Ecad MO CO	Complete Overlap	h2b12	12.32	575.085	19.745	4095	19.944
Ecad MO CO	Complete Overlap	h2b12	12.32	333.438	33.173	1898.243	19.944
Ecad MO CO	Complete Overlap
Ecad MO CO	Complete Overlap	h2b13	7.727	669.731	70.509	2800.99	12.461
Ecad MO CO	Complete Overlap	h2b13	7.727	462.863	80.144	2518.497	12.461
Ecad MO CO	Complete Overlap	h2b13	7.727	396.813	50.508	1701.399	12.461
Ecad MO CO	Complete Overlap	h2b13	7.727	306.753	47.458	1037.496	12.461
Ecad MO CO	Complete Overlap	h2b13	7.727	228.93	58.448	863.957	12.461
Ecad MO CO	Complete Overlap	h2b13	7.727	194.847	22.995	1440.643	12.461
Ecad MO CO	Complete Overlap
Ecad MO CO	Complete Overlap	h2b14	5.944	746.13	92.555	2363.334	9.577
Ecad MO CO	Complete Overlap	h2b14	5.944	661.186	98.865	2526.908	9.577
Ecad MO CO	Complete Overlap	h2b14	5.944	562.242	116.087	2394.766	9.577
Ecad MO CO	Complete Overlap	h2b14	5.944	467.734	96.786	1712.256	9.577
Ecad MO CO	Complete Overlap	h2b14	5.944	327.768	48.061	1440.179	9.577
Ecad MO CO	Complete Overlap	h2b14	5.944	307.512	58.984	2044.042	9.577
Ecad MO CO	Complete Overlap	h3b1	5.836	1250.554	82.804	4083.579	9.401
Ecad MO CO	Complete Overlap	h3b1	5.836	917.545	113.376	3365.697	9.401
Ecad MO CO	Complete Overlap	h3b1	5.836	592.716	65.196	2127.303	9.401
Ecad MO CO	Complete Overlap	h3b1	5.836	408.628	60.01	2284.719	9.401
Ecad MO CO	Complete Overlap	h3b1	5.836	344.208	20.36	1217.579	9.401
Ecad MO CO	Complete Overlap
Ecad MO CO	Complete Overlap	h3b2	10.266	870.196	186.977	3771.951	16.599
Ecad MO CO	Complete Overlap	h3b2	10.266	738.718	185.361	3479.568	16.599
Ecad MO CO	Complete Overlap	h3b2	10.266	508.8	93.831	1762.5	16.599
Ecad MO CO	Complete Overlap	h3b2	10.266	377.8	79.566	1651.39	16.599
Ecad MO CO	Complete Overlap	h3b2	10.266	309.174	65.615	1959.184	16.599
Ecad MO CO	Complete Overlap
Ecad MO CO	Complete Overlap	h3b3	9.78	982.137	160.105	3927.422	15.815
Ecad MO CO	Complete Overlap	h3b3	9.78	1019.954	70.849	3524.799	15.815
Ecad MO CO	Complete Overlap	h3b3	9.78	938.672	108.373	3955.583	15.815
Ecad MO CO	Complete Overlap	h3b3	9.78	626.39	101.056	3488.333	15.815
Ecad MO CO	Complete Overlap	h3b3	9.78	432.132	35.401	1894.484	15.815
Ecad MO CO	Complete Overlap	h3b3	9.78	342.201	27.236	1806.542	15.815
Ecad MO CO	Complete Overlap
Ecad MO CO	Complete Overlap	h3b4	10.807	1036.132	141.186	4095	17.484
Ecad MO CO	Complete Overlap	h3b4	10.807	1112.881	100.21	3958.612	17.484
Ecad MO CO	Complete Overlap	h3b4	10.807	979.305	88.639	4084.758	17.484
Ecad MO CO	Complete Overlap	h3b4	10.807	673.491	55.971	4077.835	17.484
Ecad MO CO	Complete Overlap	h3b4	10.807	407.198	38.087	3370.024	17.484
Ecad MO CO	Complete Overlap	h3b4	10.807	353.129	29.911	4095	17.484
Ecad MO CO	Complete Overlap
Ecad MO CO	Complete Overlap	h3b5	10.645	951.497	124.27	3448.862	17.22
Ecad MO CO	Complete Overlap	h3b5	10.645	842.441	186.915	3202.211	17.22
Ecad MO CO	Complete Overlap	h3b5	10.645	728.01	129.772	3101.537	17.22
Ecad MO CO	Complete Overlap	h3b5	10.645	610.782	94.524	2933.859	17.22
Ecad MO CO	Complete Overlap	h3b5	10.645	454.328	78.965	2713.419	17.22
Ecad MO CO	Complete Overlap	h3b5	10.645	277.117	44.977	1317.89	17.22
Ecad MO CO	Complete Overlap
Ecad MO CO	Complete Overlap	h3b6	7.187	918.122	137.641	3811.171	11.597
Ecad MO CO	Complete Overlap	h3b6	7.187	604.146	86.603	2657.05	11.597
Ecad MO CO	Complete Overlap	h3b6	7.187	464.796	82.591	3050.345	11.597
Ecad MO CO	Complete Overlap	h3b6	3.728	831.465	131.929	3667.177	5.974
Ecad MO CO	Complete Overlap	h3b6	3.728	647.625	135.298	2252.368	5.974
Ecad MO CO	Complete Overlap	h3b6	3.728	384.522	85.016	1535.223	5.974
Ecad MO CO	Complete Overlap	h3b6	3.728	276.667	33.173	2505.845	5.974
Ecad MO CO	Complete Overlap
Ecad MO CO	Complete Overlap	h3b7	9.294	925.6	99.066	4095	15.024
Ecad MO CO	Complete Overlap	h3b7	9.294	1170.936	178.536	4095	15.024
Ecad MO CO	Complete Overlap	h3b7	9.294	962.599	240.635	3894.136	15.024
Ecad MO CO	Complete Overlap	h3b7	9.294	745.357	158.358	3012.926	15.024
Ecad MO CO	Complete Overlap	h3b7	9.294	585.807	122.51	1875.222	15.024
Ecad MO CO	Complete Overlap	h3b7	9.294	405.081	69.319	2644.18	15.024
Ecad MO CO	Complete Overlap	h3b7	9.294	315.152	53.605	3937.488	15.024
Ecad MO CO	Complete Overlap	h4b1	7.835	957.885	184.735	4095	12.642
Ecad MO CO	Complete Overlap	h4b1	7.835	668.088	61.477	3887.009	12.642
Ecad MO CO	Complete Overlap	h4b1	7.835	543.626	75.34	3042.389	12.642
Ecad MO CO	Complete Overlap	h4b1	7.835	444.812	64.02	1999.226	12.642
Ecad MO CO	Complete Overlap	h4b1	7.835	392.143	54.089	1882.301	12.642
Ecad MO CO	Complete Overlap	h4b1	7.835	377.668	26.259	1752.567	12.642
Ecad MO CO	Complete Overlap
Ecad MO CO	Complete Overlap	h4b2	6.322	909.826	94.743	3468.937	10.192
Ecad MO CO	Complete Overlap	h4b2	6.322	958.137	223.922	3146.645	10.192
Ecad MO CO	Complete Overlap	h4b2	6.322	889.938	269.51	2551.272	10.192
Ecad MO CO	Complete Overlap	h4b2	6.322	746.819	174.11	1832.627	10.192
Ecad MO CO	Complete Overlap	h4b2	6.322	561.227	163.406	2093.123	10.192
Ecad MO CO	Complete Overlap	h4b2	6.322	500.463	114.179	1873.692	10.192
Ecad MO CO	Complete Overlap
Ecad MO CO	Complete Overlap	h4b3	9.78	1085.561	158.504	4008.02	15.815
Ecad MO CO	Complete Overlap	h4b3	9.78	721.999	99.309	3542.519	15.815
Ecad MO CO	Complete Overlap	h4b3	9.78	479.824	72.8	1856.137	15.815
Ecad MO CO	Complete Overlap	h4b3	9.78	334.309	59.845	1504.018	15.815
Ecad MO CO	Complete Overlap	h4b3	9.78	212.128	24.002	999.354	15.815
Ecad MO CO	Complete Overlap
Ecad MO CO	Complete Overlap	h4b4	7.349	703.075	116.604	1996.282	11.86
Ecad MO CO	Complete Overlap	h4b4	7.349	516.899	47.085	1703.854	11.86
Ecad MO CO	Complete Overlap	h4b4	7.349	417.964	56.927	1741.392	11.86
Ecad MO CO	Complete Overlap	h4b4	7.349	316.536	40.751	1365.271	11.86
Ecad MO CO	Complete Overlap	h4b4	7.349	244.079	20.175	1112.728	11.86
Ecad MO CO	Complete Overlap	h4b4	7.349	266.877	47.916	2162.094	11.86
Ecad MO CO	Complete Overlap
Ecad MO CO	Complete Overlap	h4b5	7.565	979.828	186.996	4057.225	12.212
Ecad MO CO	Complete Overlap	h4b5	7.565	619.995	83.801	3912.065	12.212
Ecad MO CO	Complete Overlap	h4b5	7.565	325.853	54.913	2000.512	12.212
Ecad MO CO	Complete Overlap	h4b5	7.565	265.585	32.847	1490.147	12.212
Ecad MO CO	Complete Overlap	h4b5	7.565	223.849	31.788	1185.163	12.212
Ecad MO CO	Complete Overlap
Ecad MO CO	Complete Overlap	h4b6	9.672	1148.112	270.769	3404.766	15.639
Ecad MO CO	Complete Overlap	h4b6	9.672	837.955	136.212	3010.815	15.639
Ecad MO CO	Complete Overlap	h4b6	9.672	422.72	78.548	1534.439	15.639
Ecad MO CO	Complete Overlap	h4b6	9.672	302.067	44.355	1143.614	15.639
Ecad MO CO	Complete Overlap	h4b6	9.672	230.822	32.596	956.85	15.639
Ecad MO CO	Complete Overlap	h4b6	9.672	169.689	15.163	582.211	15.639
Ecad MO CO	Complete Overlap	h4b6	9.672	126.294	7.372	576.614	15.639
Ecad MO CO	Complete Overlap
Ecad MO CO	Complete Overlap	h4b7	7.133	1252.259	340.112	3904.673	11.509
Ecad MO CO	Complete Overlap	h4b7	7.133	987.313	121.327	3072.292	11.509
Ecad MO CO	Complete Overlap	h4b7	7.133	788.786	112.517	2879.524	11.509
Ecad MO CO	Complete Overlap	h4b7	7.133	575.044	93.871	2901.585	11.509
Ecad MO CO	Complete Overlap	h4b7	7.133	378.083	52.344	2819.023	11.509
Ecad MO CO	Complete Overlap	h4b7	7.133	203.084	18.71	738.791	11.509
Ecad MO PO	Partial Overlap	h1b1	9.132	1492.784	197.526	4095	14.76
Ecad MO PO	Partial Overlap	h1b1	9.132	1022.723	167.208	4057.671	14.76
Ecad MO PO	Partial Overlap	h1b1	9.132	547.937	65.14	1888.836	14.76
Ecad MO PO	Partial Overlap	h1b1	9.132	401.713	63.762	1332.395	14.76
Ecad MO PO	Partial Overlap	h1b1	9.132	272.468	55.533	1242.908	14.76
Ecad MO PO	Partial Overlap	h1b1	9.132	230.406	48.818	1277.992	14.76
Ecad MO PO	Partial Overlap
Ecad MO PO	Partial Overlap	h1b2	7.024	902.144	198.049	3525.291	11.334
Ecad MO PO	Partial Overlap	h1b2	7.024	1020.717	240.212	3113.297	11.334
Ecad MO PO	Partial Overlap	h1b2	7.024	1065.794	320.758	3660.939	11.334
Ecad MO PO	Partial Overlap	h1b2	7.024	894.561	190.274	2901.054	11.334
Ecad MO PO	Partial Overlap	h1b2	7.024	528.608	135.471	1957.405	11.334
Ecad MO PO	Partial Overlap	h1b2	7.024	448.162	69.685	2871.793	11.334
Ecad MO PO	Partial Overlap	h1b2	7.024	412.732	55.732	1980.709	11.334
Ecad MO PO	Partial Overlap
Ecad MO PO	Partial Overlap	h1b3	5.349	696.092	126.98	1855.958	8.61
Ecad MO PO	Partial Overlap	h1b3	5.349	405.438	91.33	1359.32	8.61
Ecad MO PO	Partial Overlap	h1b3	5.349	251.946	46.112	1603.837	8.61
Ecad MO PO	Partial Overlap	h1b3	5.349	152.897	18.193	828.376	8.61
Ecad MO PO	Partial Overlap	h1b3	5.349	93.356	10.843	957.851	8.61
Ecad MO PO	Partial Overlap
Ecad MO PO	Partial Overlap	h2b1	4.377	661.958	146.755	1937.858	7.029
Ecad MO PO	Partial Overlap	h2b1	4.377	484.699	120.018	1195.245	7.029
Ecad MO PO	Partial Overlap	h2b1	4.377	308.922	56.974	1047.59	7.029
Ecad MO PO	Partial Overlap	h2b1	4.377	213.73	44.663	1950.114	7.029
Ecad MO PO	Partial Overlap
Ecad MO PO	Partial Overlap	h2b2	10.05	784.638	160.219	2683.52	16.254
Ecad MO PO	Partial Overlap	h2b2	10.05	672.286	125.748	3150.984	16.254
Ecad MO PO	Partial Overlap	h2b2	10.05	552.795	114.419	2168.582	16.254
Ecad MO PO	Partial Overlap	h2b2	10.05	405.664	78.905	2201.622	16.254
Ecad MO PO	Partial Overlap	h2b2	10.05	337.514	45.893	1901.322	16.254
Ecad MO PO	Partial Overlap
Ecad MO PO	Partial Overlap	h2b3	12.104	896.855	130.434	3412.225	19.593
Ecad MO PO	Partial Overlap	h2b3	12.104	778.66	140.493	2749.42	19.593
Ecad MO PO	Partial Overlap	h2b3	12.104	627.16	89.893	3010.178	19.593
Ecad MO PO	Partial Overlap	h2b3	12.104	455.454	87.793	2035.707	19.593
Ecad MO PO	Partial Overlap	h2b3	12.104	314.443	62.474	1500.607	19.593
Ecad MO PO	Partial Overlap	h2b3	12.104	279.207	37.354	1645.779	19.593
Ecad MO PO	Partial Overlap
Ecad MO PO	Partial Overlap	h2b4	7.943	553.329	97.579	1466.587	12.827
Ecad MO PO	Partial Overlap	h2b4	7.943	438.179	67.525	1251.029	12.827
Ecad MO PO	Partial Overlap	h2b4	7.943	346.979	39.928	2278.068	12.827
Ecad MO PO	Partial Overlap	h2b4	7.943	359.034	59.71	2237.575	12.827
Ecad MO PO	Partial Overlap
Ecad MO PO	Partial Overlap	h2b5	5.728	1079.701	158.009	4075.578	9.225
Ecad MO PO	Partial Overlap	h2b5	5.728	970.075	167.159	2925.171	9.225
Ecad MO PO	Partial Overlap	h2b5	5.728	491.712	73.543	1153.839	9.225
Ecad MO PO	Partial Overlap	h2b5	5.728	352.793	44.797	898.223	9.225
Ecad MO PO	Partial Overlap	h2b5	5.728	238.935	20.656	906.365	9.225
Ecad MO PO	Partial Overlap	h2b5	5.728	196.417	27.355	1125.787	9.225
Ecad MO PO	Partial Overlap
Ecad MO PO	Partial Overlap	h2b6	7.565	801.038	131.741	2897.122	12.212
Ecad MO PO	Partial Overlap	h2b6	7.565	685.994	98.624	2376.191	12.212
Ecad MO PO	Partial Overlap	h2b6	7.565	497.369	95.825	3578.793	12.212
Ecad MO PO	Partial Overlap	h2b6	7.565	347.98	85.434	1354.226	12.212
Ecad MO PO	Partial Overlap	h2b6	7.565	317.511	26.12	1041.2	12.212
Ecad MO PO	Partial Overlap
Ecad MO PO	Partial Overlap
Ecad MO PO	Partial Overlap
Ecad MO PO	Partial Overlap
Ecad MO PO	Partial Overlap	h3b1	9.888	1096.894	175.508	3365.735	15.99
Ecad MO PO	Partial Overlap	h3b1	9.888	827.079	161.068	3970.95	15.99
Ecad MO PO	Partial Overlap	h3b1	9.888	535.038	80.067	2615.877	15.99
Ecad MO PO	Partial Overlap	h4b1	9.24	1078.353	286.914	3563.429	14.935
Ecad MO PO	Partial Overlap	h4b1	9.24	552.881	120.13	1935.356	14.935
Ecad MO PO	Partial Overlap	h4b1	9.24	389.877	95.637	1645.308	14.935
Ecad MO PO	Partial Overlap	h4b1	9.24	300.379	69.612	1573.458	14.935
Ecad MO PO	Partial Overlap	h4b1	9.24	257.736	55.3	885.887	14.935
Ecad MO PO	Partial Overlap	h4b1	9.24	261.537	17.301	1293.108	14.935
Ecad MO PO	Partial Overlap
Ecad MO PO	Partial Overlap	h4b2	8.321	1071.672	208.012	3758.613	13.442
Ecad MO PO	Partial Overlap	h4b2	8.321	876.047	173.059	2842.125	13.442
Ecad MO PO	Partial Overlap	h4b2	8.321	603.611	135.021	2611.623	13.442
Ecad MO PO	Partial Overlap	h4b2	8.321	478.71	95.22	1494.261	13.442
Ecad MO PO	Partial Overlap	h4b2	8.321	456.508	50.812	1690.28	13.442
Ecad MO PO	Partial Overlap	h4b2	8.321	429.489	43.741	1573.111	13.442
Ecad MO PO	Partial Overlap
Ecad MO NO	No Overlap	h1b1	5.998	1833.991	490.986	4065.927	9.664
Ecad MO NO	No Overlap	h1b1	5.998	1332.01	310.657	4095	9.664
Ecad MO NO	No Overlap	h1b1	5.998	625.693	134.124	2966.487	9.664
Ecad MO NO	No Overlap	h1b1	5.998	294.797	44.45	882.235	9.664
Ecad MO NO	No Overlap	h1b1	5.998	261.607	37.573	998.054	9.664
Ecad MO NO	No Overlap	h1b1	5.998	269.048	18.555	1339.207	9.664
Ecad MO NO	No Overlap
Ecad MO NO	No Overlap	h1b2	5.025	755.074	67.594	1948.428	8.083
Ecad MO NO	No Overlap	h1b2	5.025	420.79	53.221	1313.392	8.083
Ecad MO NO	No Overlap	h1b2	5.025	223.243	45.969	776.375	8.083
Ecad MO NO	No Overlap	h1b2	5.025	117.761	13.472	413.316	8.083
Ecad MO NO	No Overlap	h1b2	5.025	77.121	4.265	303.386	8.083
Ecad MO NO	No Overlap	h1b2	5.025	58.867	0.75	288.623	8.083
Ecad MO NO	No Overlap
Ecad MO NO	No Overlap	h1b3	8.591	1136.591	294.303	3306.6	13.882
Ecad MO NO	No Overlap	h1b3	8.591	903.157	223.855	2594.643	13.882
Ecad MO NO	No Overlap	h1b3	8.591	534.243	139.611	1715.034	13.882
Ecad MO NO	No Overlap	h1b3	8.591	239.72	46.894	1088.822	13.882
Ecad MO NO	No Overlap	h1b3	8.591	173.636	22.294	1210.275	13.882
Ecad MO NO	No Overlap	h1b3	8.591	142.644	8.309	942.277	13.882
Ecad MO NO	No Overlap
Ecad MO NO	No Overlap	h1b4	7.133	1302.664	195.019	4089	11.507
Ecad MO NO	No Overlap	h1b4	7.133	1237.07	261.202	3841.266	11.507
Ecad MO NO	No Overlap	h1b4	7.133	890.543	228.429	3149.004	11.507
Ecad MO NO	No Overlap	h1b4	7.133	526.096	131.783	2272.224	11.507
Ecad MO NO	No Overlap	h1b4	7.133	316.764	73.143	1113.407	11.507
Ecad MO NO	No Overlap	h1b4	7.133	207.754	19.883	770.186	11.507
Ecad MO NO	No Overlap
Ecad MO NO	No Overlap	h1b5	9.942	927.315	84.871	3999.935	16.078
Ecad MO NO	No Overlap	h1b5	9.942	696.242	107.547	3107.918	16.078
Ecad MO NO	No Overlap	h1b5	9.942	386.44	86.695	1025.917	16.078
Ecad MO NO	No Overlap	h1b5	9.942	259.948	40.878	934.087	16.078
Ecad MO NO	No Overlap	h1b5	9.942	179.39	2.282	566.47	16.078
Ecad MO NO	No Overlap
Ecad MO NO	No Overlap	h1b6	6.43	467.22	54.581	1241.185	10.367
Ecad MO NO	No Overlap	h1b6	6.43	302.136	51.426	1284.43	10.367
Ecad MO NO	No Overlap	h1b6	6.43	207.4	14.63	924.272	10.367
Ecad MO NO	No Overlap	h1b6	6.43	136.671	1.968	722.946	10.367
Ecad MO NO	No Overlap	h1b6	6.43	90.898	3.03	461.237	10.367
Ecad MO NO	No Overlap
Ecad MO NO	No Overlap	h1b7	8.267	1256.343	225.837	4095	13.352
Ecad MO NO	No Overlap	h1b7	8.267	635.533	153.854	2729.451	13.352
Ecad MO NO	No Overlap	h1b7	8.267	464.707	85.899	1857.206	13.352
Ecad MO NO	No Overlap	h1b7	8.267	302.036	34.465	1163.595	13.352
Ecad MO NO	No Overlap	h1b7	8.267	228	26.656	1479.737	13.352
Ecad MO NO	No Overlap	h1b7	8.267	192.374	6.344	2004.257	13.352
Ecad MO NO	No Overlap	h1b7	8.267	169.412	3.999	634.929	13.352
Ecad MO NO	No Overlap	h3b1	11.725	924.273	213.619	3145.315	18.977
Ecad MO NO	No Overlap	h3b1	11.725	888.408	173.23	3819.506	18.977
Ecad MO NO	No Overlap	h3b1	11.725	798.687	99.814	3240.337	18.977
Ecad MO NO	No Overlap	h3b1	11.725	608.226	85.837	3141.064	18.977
Ecad MO NO	No Overlap	h3b1	11.725	345.454	36.278	1332.611	18.977
Ecad MO NO	No Overlap	h3b1	11.725	204.759	20.808	861.115	18.977
Ecad MO NO	No Overlap
Ecad MO NO	No Overlap	h3b2	9.51	1094.571	221.727	3749.495	15.375
Ecad MO NO	No Overlap	h3b2	9.51	998.661	224.948	3193.471	15.375
Ecad MO NO	No Overlap	h3b2	9.51	860.579	194.043	3539.013	15.375
Ecad MO NO	No Overlap	h3b2	9.51	639.816	90.884	2911.591	15.375
Ecad MO NO	No Overlap	h3b2	9.51	390.771	63.907	1473.375	15.375
Ecad MO NO	No Overlap	h3b2	9.51	257.309	34.596	2331.041	15.375
Ecad MO NO	No Overlap
Ecad MO NO	No Overlap	h3b3	9.24	1149.923	124.508	4085.359	14.936
Ecad MO NO	No Overlap	h3b3	9.24	1085.017	100.111	4095	14.936
Ecad MO NO	No Overlap	h3b3	9.24	880.981	73.816	3877.274	14.936
Ecad MO NO	No Overlap	h3b3	9.24	590.518	67.59	3057.273	14.936
Ecad MO NO	No Overlap	h3b3	9.24	385.287	39.074	1663.55	14.936
Ecad MO NO	No Overlap
Ecad MO NO	No Overlap	h3b4	10.429	703.742	112.156	2855.461	16.869
Ecad MO NO	No Overlap	h3b4	10.429	467.077	95.366	1471.293	16.869
Ecad MO NO	No Overlap	h3b4	10.429	308.669	42.215	2362.893	16.869
Ecad MO NO	No Overlap	h3b4	10.429	267.596	30.127	3233.062	16.869
Ecad MO NO	No Overlap	h3b4	10.429	232.489	18.014	3444.423	16.869
Ecad MO NO	No Overlap
Ecad MO NO	No Overlap	h4b1	8.429	849.905	205.468	2174.494	13.618
Ecad MO NO	No Overlap	h4b1	8.429	610.764	96.872	2280.113	13.618
Ecad MO NO	No Overlap	h4b1	8.429	356.921	78.156	1553.349	13.618
Ecad MO NO	No Overlap	h4b1	8.429	189.829	13.641	666.397	13.618
Ecad MO NO	No Overlap	h4b1	8.429	147.136	4.345	646.74	13.618
Ecad MO NO	No Overlap	h4b1	8.429	113.282	5.184	451.003	13.618
Ecad MO NO	No Overlap
Ecad MO NO	No Overlap	h4b2	8.375	867.937	186.441	3654.836	13.53
Ecad MO NO	No Overlap	h4b2	8.375	681.115	105.178	3126.522	13.53
Ecad MO NO	No Overlap	h4b2	8.375	516.127	69.275	1760.603	13.53
Ecad MO NO	No Overlap	h4b2	8.375	332.855	54.439	1254.186	13.53
Ecad MO NO	No Overlap	h4b2	8.375	200.177	14.342	1230.766	13.53
Ecad MO NO	No Overlap	h4b2	8.375	145.76	7.297	1576.309	13.53
Ecad MO NO	No Overlap
Ecad MO NO	No Overlap	h4b3	8.159	1044.601	215.501	3028.415	13.179
Ecad MO NO	No Overlap	h4b3	8.159	876.842	263.091	2741.684	13.179
Ecad MO NO	No Overlap	h4b3	8.159	674.912	94.961	3240.528	13.179
Ecad MO NO	No Overlap	h4b3	8.159	388.664	76.245	1198.789	13.179
Ecad MO NO	No Overlap	h4b3	8.159	309.18	62.596	1014.011	13.179
Ecad MO NO	No Overlap	h4b3	8.159	247.352	34.738	908.469	13.179
Ctrl MO CO	Complete Overlap	h5b1	10.266	493.362	184.005	1395.021	16.605
Ctrl MO CO	Complete Overlap	h5b1	10.266	432.491	194.519	992.169	16.605
Ctrl MO CO	Complete Overlap	h5b1	10.266	351.802	147.932	668.992	16.605
Ctrl MO CO	Complete Overlap	h5b1	10.266	287.969	169.329	555.992	16.605
Ctrl MO CO	Complete Overlap	h5b1	10.266	244.097	134.835	381.596	16.605
Ctrl MO CO	Complete Overlap
Ctrl MO CO	Complete Overlap	h5b2	10.321	539.113	238.534	1065.754	16.693
Ctrl MO CO	Complete Overlap	h5b2	10.321	427.339	224.667	889.162	16.693
Ctrl MO CO	Complete Overlap	h5b2	10.321	324.844	188.817	707.367	16.693
Ctrl MO CO	Complete Overlap	h5b2	10.321	258.883	138.596	440.902	16.693
Ctrl MO CO	Complete Overlap
Ctrl MO CO	Complete Overlap	h5b3	10.699	587.565	238.187	1337.867	17.308
Ctrl MO CO	Complete Overlap	h5b3	10.699	464.461	230.655	1158.906	17.308
Ctrl MO CO	Complete Overlap	h5b3	10.699	353.959	162.349	852.922	17.308
Ctrl MO CO	Complete Overlap	h5b3	10.699	293.75	152.469	600.401	17.308
Ctrl MO CO	Complete Overlap	h5b3	10.699	258.443	134.094	534.379	17.308
Ctrl MO CO	Complete Overlap
Ctrl MO CO	Complete Overlap	h5b4	9.456	492.767	178.19	1065.565	15.287
Ctrl MO CO	Complete Overlap	h5b4	9.456	414.508	156.198	825.763	15.287
Ctrl MO CO	Complete Overlap	h5b4	9.456	342.654	140.521	676.296	15.287
Ctrl MO CO	Complete Overlap	h5b4	9.456	278.995	124.882	490.174	15.287
Ctrl MO CO	Complete Overlap	h5b4	9.456	217.848	112.61	372.05	15.287
Ctrl MO CO	Complete Overlap
Ctrl MO CO	Complete Overlap	h5b5	4.971	459.01	227.511	845.168	7.995
Ctrl MO CO	Complete Overlap	h5b5	4.971	415.875	203.421	818.158	7.995
Ctrl MO CO	Complete Overlap	h5b5	4.971	353.131	194.518	678.297	7.995
Ctrl MO CO	Complete Overlap	h5b5	4.971	270.681	143.51	482.181	7.995
Ctrl MO CO	Complete Overlap	h5b5	4.971	213.555	130.336	355.088	7.995
Ctrl MO CO	Complete Overlap
Ctrl MO CO	Complete Overlap	h5b6	12.914	591.758	265.417	1371.725	20.91
Ctrl MO CO	Complete Overlap	h5b6	12.914	497.716	228.337	1118.549	20.91
Ctrl MO CO	Complete Overlap	h5b6	12.914	384.57	186.417	784.405	20.91
Ctrl MO CO	Complete Overlap	h5b6	12.914	307.978	144.262	605.815	20.91
Ctrl MO CO	Complete Overlap	h5b6	12.914	256.568	143.983	427.295	20.91
Ctrl MO CO	Complete Overlap	h6b1	3.134	1051.249	449.283	2193.457	5.008
Ctrl MO CO	Complete Overlap	h6b1	9.78	625.114	235.136	1368.935	15.815
Ctrl MO CO	Complete Overlap	h6b1	9.78	527.744	248.841	1293.231	15.815
Ctrl MO CO	Complete Overlap	h6b1	9.78	437.031	216.372	821.977	15.815
Ctrl MO CO	Complete Overlap	h6b1	9.78	370.914	177.864	612.501	15.815
Ctrl MO CO	Complete Overlap	h6b1	9.78	327.259	159.869	556.638	15.815
Ctrl MO CO	Complete Overlap
Ctrl MO CO	Complete Overlap	h6b2	9.78	625.114	235.136	1368.935	15.815
Ctrl MO CO	Complete Overlap	h6b2	9.78	527.744	248.841	1293.231	15.815
Ctrl MO CO	Complete Overlap	h6b2	9.78	437.031	216.372	821.977	15.815
Ctrl MO CO	Complete Overlap	h6b2	9.78	370.914	177.864	612.501	15.815
Ctrl MO CO	Complete Overlap	h6b2	9.78	327.259	159.869	556.638	15.815
Ctrl MO CO	Complete Overlap
Ctrl MO CO	Complete Overlap	h6b3	6.808	785.762	316.898	1415.842	10.982
Ctrl MO CO	Complete Overlap	h6b3	6.808	675.038	226.571	1378.642	10.982
Ctrl MO CO	Complete Overlap	h6b3	6.808	553.694	273.559	1227.167	10.982
Ctrl MO CO	Complete Overlap	h6b3	6.808	459.11	226.847	925.124	10.982
Ctrl MO CO	Complete Overlap	h6b3	6.808	389.664	178.37	706.537	10.982
Ctrl MO CO	Complete Overlap
Ctrl MO CO	Complete Overlap	h6b4	7.565	641.023	270.755	1302.685	12.212
Ctrl MO CO	Complete Overlap	h6b4	7.565	551.774	274.244	1049.057	12.212
Ctrl MO CO	Complete Overlap	h6b4	7.565	440.354	227.486	795.061	12.212
Ctrl MO CO	Complete Overlap	h6b4	7.565	372.619	211.437	613.033	12.212
Ctrl MO CO	Complete Overlap	h6b4	7.565	320.844	177.504	523.298	12.212
Ctrl MO CO	Complete Overlap
Ctrl MO CO	Complete Overlap	h6b5	9.348	645.363	268.943	1423.236	15.112
Ctrl MO CO	Complete Overlap	h6b5	9.348	530.951	235.578	1105.515	15.112
Ctrl MO CO	Complete Overlap	h6b5	9.348	431.97	214.113	821.116	15.112
Ctrl MO CO	Complete Overlap	h6b5	9.348	361.262	196.911	623.849	15.112
Ctrl MO CO	Complete Overlap	h6b5	9.348	315.472	146.863	627.078	15.112
Ctrl MO CO	Complete Overlap
Ctrl MO CO	Complete Overlap	h6b6	12.428	696.551	310.391	1556.97	20.117
Ctrl MO CO	Complete Overlap	h6b6	12.428	619.581	273.407	1358.222	20.117
Ctrl MO CO	Complete Overlap	h6b6	12.428	505.518	262.239	1012.535	20.117
Ctrl MO CO	Complete Overlap	h6b6	12.428	402.688	194.021	688.59	20.117
Ctrl MO CO	Complete Overlap	h6b6	12.428	345.275	194.271	641.683	20.117
Ctrl MO CO	Complete Overlap	h7b1	8.97	177.476	99.891	343.13	14.497
Ctrl MO CO	Complete Overlap	h7b1	8.97	184.446	101.02	428.426	14.497
Ctrl MO CO	Complete Overlap	h7b1	8.97	188.203	101.954	405.145	14.497
Ctrl MO CO	Complete Overlap	h7b1	8.97	188.5	99.933	357.474	14.497
Ctrl MO CO	Complete Overlap	h7b1	8.97	177.234	100.096	412	14.497
Ctrl MO CO	Complete Overlap	h7b1	8.97	158.969	98.195	325.276	14.497
Ctrl MO CO	Complete Overlap
Ctrl MO CO	Complete Overlap	h7b2	15.13	225.099	105.3	434.438	24.512
Ctrl MO CO	Complete Overlap	h7b2	15.13	231.005	107.006	510.74	24.512
Ctrl MO CO	Complete Overlap	h7b2	15.13	226.937	109.315	445.341	24.512
Ctrl MO CO	Complete Overlap	h7b2	15.13	211.531	116.149	474.397	24.512
Ctrl MO CO	Complete Overlap	h7b2	15.13	184.409	102.812	386.567	24.512
Ctrl MO CO	Complete Overlap	h7b2	15.13	163.214	96.347	521.557	24.512
Ctrl MO CO	Complete Overlap	h7b2	15.13	149.751	99.455	529.292	24.512
Ctrl MO CO	Complete Overlap	h7b2	15.13	139.785	95.56	302.929	24.512
Ctrl MO CO	Complete Overlap
Ctrl MO CO	Complete Overlap	h7b3	5.89	141.01	98.563	290.15	9.489
Ctrl MO CO	Complete Overlap	h7b3	5.89	131.463	99.022	287.3	9.489
Ctrl MO CO	Complete Overlap	h7b3	5.89	124.407	92.972	227.54	9.489
Ctrl MO CO	Complete Overlap	h7b3	5.89	119.102	93.066	213.327	9.489
Ctrl MO CO	Complete Overlap
Ctrl MO CO	Complete Overlap	h7b4	6.754	145.491	98.728	268.68	10.894
Ctrl MO CO	Complete Overlap	h7b4	6.754	137.415	95.73	286.755	10.894
Ctrl MO CO	Complete Overlap	h7b4	6.754	129.799	95.591	280.17	10.894
Ctrl MO CO	Complete Overlap	h7b4	6.754	126.221	92.226	380.673	10.894
Ctrl MO CO	Complete Overlap
Ctrl MO CO	Complete Overlap	h8b1	12.698	172.581	105.469	307.86	20.559
Ctrl MO CO	Complete Overlap	h8b1	12.698	168.189	102.655	334.944	20.559
Ctrl MO CO	Complete Overlap	h8b1	12.698	160.79	99.9	319.829	20.559
Ctrl MO CO	Complete Overlap	h8b1	12.698	144.981	99.018	281.326	20.559
Ctrl MO CO	Complete Overlap	h8b1	12.698	130.794	93.684	227.254	20.559
Ctrl MO CO	Complete Overlap
Ctrl MO CO	Complete Overlap	h8b2	6.16	152.46	92.513	259.928	9.928
Ctrl MO CO	Complete Overlap	h8b2	6.16	142.552	99.611	251.168	9.928
Ctrl MO CO	Complete Overlap	h8b2	6.16	135.648	98.638	251.776	9.928
Ctrl MO CO	Complete Overlap	h8b2	6.16	128.886	98.18	289.362	9.928
Ctrl MO CO	Complete Overlap	h8b2	6.16	118.59	94.53	191.151	9.928
Ctrl MO CO	Complete Overlap	h8b2	6.16	113.782	95.354	177.719	9.928
Ctrl MO CO	Complete Overlap	h8b2	6.16	110.665	95.635	156.614	9.928
Ctrl MO CO	Complete Overlap
Ctrl MO CO	Complete Overlap	h8b3	8.591	159.816	104.294	266.678	13.882
Ctrl MO CO	Complete Overlap	h8b3	8.591	145.4	97.681	233.065	13.882
Ctrl MO CO	Complete Overlap	h8b3	8.591	133.484	98.882	260.852	13.882
Ctrl MO CO	Complete Overlap	h8b3	8.591	124.18	95.357	199.776	13.882
Ctrl MO CO	Complete Overlap	h8b3	8.591	117.757	95.133	205.81	13.882
Ctrl MO CO	Complete Overlap	h8b3	8.591	112.157	95.238	183.081	13.882
Ctrl MO CO	Complete Overlap	h8b3	8.591	108.522	94.907	170.469	13.882
Ctrl MO CO	Complete Overlap
Ctrl MO CO	Complete Overlap	h9b1	7.078	284.534	145.283	528.576	11.422
Ctrl MO CO	Complete Overlap	h9b1	7.078	273.241	112.734	497.169	11.422
Ctrl MO CO	Complete Overlap	h9b1	7.078	255.669	112.907	494.985	11.422
Ctrl MO CO	Complete Overlap	h9b1	7.078	229.661	120.322	425.498	11.422
Ctrl MO CO	Complete Overlap	h9b1	7.078	211.221	119.706	391.108	11.422
Ctrl MO CO	Complete Overlap	h9b1	7.997	187.264	100.606	372.283	12.908
Ctrl MO CO	Complete Overlap	h9b1	7.997	180.689	101.853	353.942	12.908
Ctrl MO CO	Complete Overlap	h9b1	7.997	173.61	100.307	330.535	12.908
Ctrl MO CO	Complete Overlap	h9b1	7.997	162.531	93.931	314.242	12.908
Ctrl MO CO	Complete Overlap	h9b1	7.997	147.787	94.598	291.897	12.908
Ctrl MO CO	Complete Overlap
Ctrl MO CO	Complete Overlap	h9b2	3.674	227.926	124.286	487.328	5.887
Ctrl MO CO	Complete Overlap	h9b2	3.674	204.256	118.868	381.138	5.887
Ctrl MO CO	Complete Overlap	h9b2	3.674	174.922	108.491	359.87	5.887
Ctrl MO CO	Complete Overlap	h9b2	3.674	156.651	103.094	255.952	5.887
Ctrl MO CO	Complete Overlap	h9b2	3.674	137.846	106.431	202.629	5.887
Ctrl MO CO	Complete Overlap
Ctrl MO CO	Complete Overlap	h9b3	13.4	223.763	112.979	444.988	21.701
Ctrl MO CO	Complete Overlap	h9b3	13.4	207.748	103.559	388.921	21.701
Ctrl MO CO	Complete Overlap	h9b3	13.4	193.531	100.919	416.221	21.701
Ctrl MO CO	Complete Overlap	h9b3	13.4	174.386	96.803	356.955	21.701
Ctrl MO CO	Complete Overlap	h9b3	13.4	159.819	96.592	353.024	21.701
Ctrl MO CO	Complete Overlap
Ctrl MO CO	Complete Overlap	h9b4	5.133	192.707	110.968	406.163	8.259
Ctrl MO CO	Complete Overlap	h9b4	5.133	178.113	104.233	340.037	8.259
Ctrl MO CO	Complete Overlap	h9b4	5.133	160.99	100.124	272.928	8.259
Ctrl MO CO	Complete Overlap	h9b4	5.133	143.549	91.843	248.956	8.259
Ctrl MO CO	Complete Overlap	h9b4	5.133	133.878	100.171	198.61	8.259
Ctrl MO CO	Complete Overlap
Ctrl MO CO	Complete Overlap	h9b5	7.781	169.862	105.388	361.269	12.564
Ctrl MO CO	Complete Overlap	h9b5	7.781	161.003	102.266	346.187	12.564
Ctrl MO CO	Complete Overlap	h9b5	7.781	147.141	93.749	295.987	12.564
Ctrl MO CO	Complete Overlap	h9b5	7.781	134.447	94.15	281.799	12.564
Ctrl MO CO	Complete Overlap	h9b5	7.781	125.464	92.516	220.272	12.564
Ctrl MO CO	Complete Overlap	h9b5	7.781	125.464	92.516	220.272	12.564
Ctrl MO CO	Complete Overlap
Ctrl MO CO	Complete Overlap	h9b6	9.402	219.567	108.594	420.835	15.2
Ctrl MO CO	Complete Overlap	h9b6	9.402	212.162	113.749	364.105	15.2
Ctrl MO CO	Complete Overlap	h9b6	9.402	203.625	108.302	471.159	15.2
Ctrl MO CO	Complete Overlap	h9b6	9.402	194.507	98.062	485.763	15.2
Ctrl MO CO	Complete Overlap	h9b6	9.402	179.82	101.301	487.901	15.2
Ctrl MO CO	Complete Overlap	h9b6	9.402	170.868	102.142	353.462	15.2
Ctrl MO CO	Complete Overlap
Ctrl MO CO	Complete Overlap	h9b7	8.645	223.053	113.524	526.061	13.97
Ctrl MO CO	Complete Overlap	h9b7	8.645	204.817	108.299	499.2	13.97
Ctrl MO CO	Complete Overlap	h9b7	8.645	190.52	106.341	464.451	13.97
Ctrl MO CO	Complete Overlap	h9b7	8.645	174.92	95.53	435.578	13.97
Ctrl MO CO	Complete Overlap	h9b7	8.645	162.621	98.564	447.094	13.97
Ctrl MO CO	Complete Overlap	h9b7	8.645	149.209	97.37	386.241	13.97
Ctrl MO CO	Complete Overlap
Ctrl MO CO	Complete Overlap	h9b8	7.078	181.931	107.873	337.215	11.422
Ctrl MO CO	Complete Overlap	h9b8	7.078	165.639	103.227	422.534	11.422
Ctrl MO CO	Complete Overlap	h9b8	7.078	153.237	99.645	383.002	11.422
Ctrl MO CO	Complete Overlap	h9b8	7.078	137.871	98.487	323.572	11.422
Ctrl MO CO	Complete Overlap	h9b8	7.078	129.58	92.87	265.949	11.422
Ctrl MO CO	Complete Overlap
Ctrl MO CO	Complete Overlap	h9b9	7.943	186.188	101.78	384.413	12.827
Ctrl MO CO	Complete Overlap	h9b9	7.943	188.577	106.996	429.422	12.827
Ctrl MO CO	Complete Overlap	h9b9	7.943	190.663	111.854	493.237	12.827
Ctrl MO CO	Complete Overlap	h9b9	7.943	184.049	107.048	350.591	12.827
Ctrl MO CO	Complete Overlap	h9b9	7.943	176.737	109.304	330.374	12.827
Ctrl MO CO	Complete Overlap	h9b9	7.943	162.781	105.754	323.959	12.827
Ctrl MO CO	Complete Overlap	h9b9	7.943	150.969	98.084	268.654	12.827
Ctrl MO CO	Complete Overlap
Ctrl MO CO	Complete Overlap	h9b10	7.403	199.563	108.118	399.631	11.949
Ctrl MO CO	Complete Overlap	h9b10	7.403	183.097	99.288	400.531	11.949
Ctrl MO CO	Complete Overlap	h9b10	7.403	162.188	106.365	329.454	11.949
Ctrl MO CO	Complete Overlap	h9b10	7.403	151.082	100.423	244.409	11.949
Ctrl MO CO	Complete Overlap	h9b10	7.403	140.73	96.011	231.369	11.949
Ctrl MO CO	Complete Overlap	h9b10	7.403	135.036	95.001	203.768	11.949
Ctrl MO CO	Complete Overlap
Ctrl MO CO	Complete Overlap	h9b11	11.023	171.047	102.353	376.386	17.835
Ctrl MO CO	Complete Overlap	h9b11	11.023	165.117	94.767	399.093	17.835
Ctrl MO CO	Complete Overlap	h9b11	11.023	154.591	91.713	378.959	17.835
Ctrl MO CO	Complete Overlap	h9b11	11.023	147.01	96.179	378.974	17.835
Ctrl MO CO	Complete Overlap	h9b11	11.023	138.271	92.933	354.52	17.835
Ctrl MO CO	Complete Overlap	h9b11	11.023	132.031	96.595	266.029	17.835
Ctrl MO CO	Complete Overlap	h9b11	11.023	127.874	94.403	214.374	17.835
Ctrl MO PO	Partial Overlap	h5b1	12.86	462.482	197.133	1143.598	20.823
Ctrl MO PO	Partial Overlap	h5b1	12.86	383.3	157.89	803.853	20.823
Ctrl MO PO	Partial Overlap	h5b1	12.86	305.708	138.578	621.672	20.823
Ctrl MO PO	Partial Overlap	h5b1	12.86	238.125	122.356	483.234	20.823
Ctrl MO PO	Partial Overlap	h5b1	12.86	201.959	98.864	327.935	20.823
Ctrl MO PO	Partial Overlap
Ctrl MO PO	Partial Overlap	h5b2	13.509	395.932	132.166	966.885	21.877
Ctrl MO PO	Partial Overlap	h5b2	13.509	381.602	144.209	974.25	21.877
Ctrl MO PO	Partial Overlap	h5b2	13.509	342.436	150.029	751.19	21.877
Ctrl MO PO	Partial Overlap	h5b2	13.509	304.589	129.368	741.238	21.877
Ctrl MO PO	Partial Overlap	h5b2	13.509	266.249	117.042	584.274	21.877
Ctrl MO PO	Partial Overlap	h5b2	13.509	232.336	118.552	641.299	21.877
Ctrl MO PO	Partial Overlap
Ctrl MO PO	Partial Overlap	h5b3	11.779	414.731	184.297	1140.618	19.065
Ctrl MO PO	Partial Overlap	h5b3	11.779	421.474	186.579	926.691	19.065
Ctrl MO PO	Partial Overlap	h5b3	11.779	385.028	160.09	682.815	19.065
Ctrl MO PO	Partial Overlap	h5b3	11.779	337.413	170.862	641.074	19.065
Ctrl MO PO	Partial Overlap	h5b3	11.779	270.128	141.562	515.341	19.065
Ctrl MO PO	Partial Overlap	h5b3	11.779	218.226	110.836	356.796	19.065
Ctrl MO PO	Partial Overlap
Ctrl MO PO	Partial Overlap	h5b4	8.754	483.284	216.053	1361.611	14.145
Ctrl MO PO	Partial Overlap	h5b4	8.754	502.354	233.689	1082.257	14.145
Ctrl MO PO	Partial Overlap	h5b4	8.754	499.622	265.668	973.306	14.145
Ctrl MO PO	Partial Overlap	h5b4	8.754	449.596	193.551	918.02	14.145
Ctrl MO PO	Partial Overlap	h5b4	8.754	376.011	190.461	685.013	14.145
Ctrl MO PO	Partial Overlap	h5b4	8.754	328.72	170.61	538.579	14.145
Ctrl MO PO	Partial Overlap	h5b4	8.754	297.052	140.848	497.336	14.145
Ctrl MO PO	Partial Overlap	h6b1	7.511	554.565	236.007	1431.217	12.125
Ctrl MO PO	Partial Overlap	h6b1	7.511	477.518	199.126	1274.305	12.125
Ctrl MO PO	Partial Overlap	h6b1	7.511	396.695	183.568	692.971	12.125
Ctrl MO PO	Partial Overlap	h6b1	7.511	348.255	159.557	609.351	12.125
Ctrl MO PO	Partial Overlap	h6b1	7.511	314.977	159.164	538.981	12.125
Ctrl MO PO	Partial Overlap
Ctrl MO PO	Partial Overlap	h6b2	6.7	565.421	259.113	1096.874	10.807
Ctrl MO PO	Partial Overlap	h6b2	6.7	497.283	240.509	1007.112	10.807
Ctrl MO PO	Partial Overlap	h6b2	6.7	429.392	214.145	909.996	10.807
Ctrl MO PO	Partial Overlap	h6b2	6.7	377.678	216.499	728.493	10.807
Ctrl MO PO	Partial Overlap
Ctrl MO PO	Partial Overlap	h6b3	7.727	769.592	308.199	1543.928	12.465
Ctrl MO PO	Partial Overlap	h6b3	7.727	708.066	278.743	1578.081	12.465
Ctrl MO PO	Partial Overlap	h6b3	7.727	617.094	281.549	1545.058	12.465
Ctrl MO PO	Partial Overlap	h6b3	7.727	527.317	231.597	1406.365	12.465
Ctrl MO PO	Partial Overlap	h6b3	7.727	436.203	217.133	935.469	12.465
Ctrl MO PO	Partial Overlap	h6b3	7.727	375.955	189.001	806.667	12.465
Ctrl MO PO	Partial Overlap
Ctrl MO PO	Partial Overlap	h6b4	6.97	559.528	243.911	1260.329	11.246
Ctrl MO PO	Partial Overlap	h6b4	6.97	473.159	215.054	971.056	11.246
Ctrl MO PO	Partial Overlap	h6b4	6.97	393.747	210.978	777.368	11.246
Ctrl MO PO	Partial Overlap	h6b4	6.97	340.736	196.978	642.239	11.246
Ctrl MO PO	Partial Overlap	h6b4	6.97	300.812	179.094	497.526	11.246
Ctrl MO PO	Partial Overlap	h6b4	6.97	273.095	130.998	451.856	11.246
Ctrl MO PO	Partial Overlap
Ctrl MO PO	Partial Overlap	h6b5	8.483	468.249	201.722	999.324	13.706
Ctrl MO PO	Partial Overlap	h6b5	8.483	396.139	195.71	819.312	13.706
Ctrl MO PO	Partial Overlap	h6b5	8.483	347.75	157.608	730.423	13.706
Ctrl MO PO	Partial Overlap	h6b5	8.483	322.973	178.698	584.303	13.706
Ctrl MO PO	Partial Overlap	h6b5	8.483	298.972	168.947	550.117	13.706
Ctrl MO PO	Partial Overlap	h6b5	8.483	279.826	161.925	476.395	13.706
Ctrl MO PO	Partial Overlap
Ctrl MO PO	Partial Overlap	h6b6	5.403	581.597	246.967	1254.139	8.698
Ctrl MO PO	Partial Overlap	h6b6	5.403	507.032	215.477	1076.02	8.698
Ctrl MO PO	Partial Overlap	h6b6	5.403	428.644	208.04	902.485	8.698
Ctrl MO PO	Partial Overlap	h6b6	5.403	366.436	178.512	588.267	8.698
Ctrl MO PO	Partial Overlap	h6b6	5.403	323.332	177.123	521.342	8.698
Ctrl MO PO	Partial Overlap
Ctrl MO PO	Partial Overlap	h6b7	7.187	635.097	278.904	1427.996	11.586
Ctrl MO PO	Partial Overlap	h6b7	7.187	591.202	277.578	1230.544	11.586
Ctrl MO PO	Partial Overlap	h6b7	7.187	511.7	268.171	921.336	11.586
Ctrl MO PO	Partial Overlap	h6b7	7.187	423.279	201.483	740.459	11.586
Ctrl MO PO	Partial Overlap	h6b7	7.187	349.692	163.681	647.8	11.586
Ctrl MO PO	Partial Overlap	h6b7	7.187	299.767	184.68	561.369	11.586
Ctrl MO PO	Partial Overlap
Ctrl MO PO	Partial Overlap	h6b8	9.456	611.064	271.052	1386.932	15.287
Ctrl MO PO	Partial Overlap	h6b8	9.456	547.589	230.337	1466.271	15.287
Ctrl MO PO	Partial Overlap	h6b8	9.456	447.447	212.13	1033.109	15.287
Ctrl MO PO	Partial Overlap	h6b8	9.456	357.834	177.185	729.225	15.287
Ctrl MO PO	Partial Overlap	h6b8	9.456	299.707	152.69	567.235	15.287
Ctrl MO PO	Partial Overlap	h6b8	9.456	262.998	139.963	507.646	15.287
Ctrl MO PO	Partial Overlap	h6b8	9.456	238.601	111.396	389.856	15.287
Ctrl MO PO	Partial Overlap	h7b1	13.238	174.557	94.796	575.927	21.437
Ctrl MO PO	Partial Overlap	h7b1	13.238	160.853	92.829	492.825	21.437
Ctrl MO PO	Partial Overlap	h7b1	13.238	150.873	95.634	447.608	21.437
Ctrl MO PO	Partial Overlap	h7b1	13.238	142.135	96.788	326.208	21.437
Ctrl MO PO	Partial Overlap	h7b1	13.238	132.982	92.74	291.579	21.437
Ctrl MO PO	Partial Overlap
Ctrl MO PO	Partial Overlap	h7b2	10.104	321.664	149.633	880.365	16.342
Ctrl MO PO	Partial Overlap	h7b2	10.104	278.278	135.388	736.433	16.342
Ctrl MO PO	Partial Overlap	h7b2	10.104	225.287	116.34	513.881	16.342
Ctrl MO PO	Partial Overlap	h7b2	10.104	181.219	110.758	408.085	16.342
Ctrl MO PO	Partial Overlap	h7b2	10.645	230.465	105.498	668.129	17.22
Ctrl MO PO	Partial Overlap	h8b1	5.836	172.219	102.622	391.028	9.401
Ctrl MO PO	Partial Overlap	h8b1	5.836	164.832	101.48	359.957	9.401
Ctrl MO PO	Partial Overlap	h8b1	5.836	153.853	99.43	304.919	9.401
Ctrl MO PO	Partial Overlap	h8b1	5.836	146.475	92.294	287.223	9.401
Ctrl MO PO	Partial Overlap	h8b1	5.836	139.685	95.911	278.331	9.401
Ctrl MO PO	Partial Overlap	h8b1	5.836	129.991	94.532	234.01	9.401
Ctrl MO PO	Partial Overlap	h9b1	5.998	226.023	126.816	462.858	9.664
Ctrl MO PO	Partial Overlap	h9b1	5.998	209.781	114.51	419.532	9.664
Ctrl MO PO	Partial Overlap	h9b1	5.998	187.056	113.919	340.822	9.664
Ctrl MO PO	Partial Overlap	h9b1	5.998	169.259	102.366	373.937	9.664
Ctrl MO PO	Partial Overlap	h9b1	5.998	153.688	100.493	280.521	9.664
Ctrl MO PO	Partial Overlap	h9b1	5.998	141.009	97.503	251.304	9.664
Ctrl MO PO	Partial Overlap	h9b1	5.998	130.192	96.191	256.979	9.664
Ctrl MO PO	Partial Overlap
Ctrl MO PO	Partial Overlap	h9b2	7.835	214.899	100.057	385.039	12.652
Ctrl MO PO	Partial Overlap	h9b2	7.835	206.847	111.1	428.476	12.652
Ctrl MO PO	Partial Overlap	h9b2	7.835	203.894	102.827	367.409	12.652
Ctrl MO PO	Partial Overlap	h9b2	7.835	195.143	106.062	362.215	12.652
Ctrl MO PO	Partial Overlap	h9b2	7.835	185.916	99.617	360.973	12.652
Ctrl MO PO	Partial Overlap	h9b2	7.835	170.817	100.314	347.718	12.652
Ctrl MO PO	Partial Overlap	h9b2	7.835	150.022	92.249	260.385	12.652
Ctrl MO PO	Partial Overlap
Ctrl MO PO	Partial Overlap	h9b3	12.968	194.796	105.801	411.327	20.998
Ctrl MO PO	Partial Overlap	h9b3	12.968	186.015	95.107	365.867	20.998
Ctrl MO PO	Partial Overlap	h9b3	12.968	174.623	102.031	359.826	20.998
Ctrl MO PO	Partial Overlap	h9b3	12.968	164.845	98.759	318.893	20.998
Ctrl MO PO	Partial Overlap	h9b3	12.968	153.049	98.978	345.891	20.998
Ctrl MO PO	Partial Overlap	h9b3	12.968	142.704	97.546	262.158	20.998
Ctrl MO PO	Partial Overlap
Ctrl MO PO	Partial Overlap	h9b4	10.158	173.584	105.739	306.497	16.43
Ctrl MO PO	Partial Overlap	h9b4	10.158	159.533	102.53	294.987	16.43
Ctrl MO PO	Partial Overlap	h9b4	10.158	149.879	99.398	294.55	16.43
Ctrl MO PO	Partial Overlap	h9b4	10.158	141.978	103.165	227.164	16.43
Ctrl MO PO	Partial Overlap	h9b4	10.158	136.837	99.441	249.125	16.43
Ctrl MO PO	Partial Overlap	h9b4	10.158	132.776	95.827	231.566	16.43
Ctrl MO PO	Partial Overlap
Ctrl MO NO	No Overlap	h5b1	7.241	553.524	246.055	1247.871	11.685
Ctrl MO NO	No Overlap	h5b1	7.241	578.562	254.719	996.032	11.685
Ctrl MO NO	No Overlap	h5b1	7.241	510.501	276.036	1049.737	11.685
Ctrl MO NO	No Overlap	h5b1	7.241	400.366	211.055	879.076	11.685
Ctrl MO NO	No Overlap	h5b1	7.241	309.298	158.516	598.379	11.685
Ctrl MO NO	No Overlap
Ctrl MO NO	No Overlap	h5b2	8.267	667.609	287.602	1669.606	13.354
Ctrl MO NO	No Overlap	h5b2	8.267	678.559	274.551	1590.965	13.354
Ctrl MO NO	No Overlap	h5b2	8.267	596.876	283.496	1215.407	13.354
Ctrl MO NO	No Overlap	h5b2	8.267	484.854	218.786	948.075	13.354
Ctrl MO NO	No Overlap	h5b2	8.267	380.964	185.354	663.258	13.354
Ctrl MO NO	No Overlap
Ctrl MO NO	No Overlap	h5b3	10.158	342.693	158.762	674.434	16.43
Ctrl MO NO	No Overlap	h5b3	10.158	341.262	168.103	621.24	16.43
Ctrl MO NO	No Overlap	h5b3	10.158	314.159	153.019	634.493	16.43
Ctrl MO NO	No Overlap	h5b3	10.158	277.668	131.197	602.007	16.43
Ctrl MO NO	No Overlap	h5b3	10.158	247.055	145.36	500.684	16.43
Ctrl MO NO	No Overlap
Ctrl MO NO	No Overlap	h5b4	10.915	322.227	114.853	702.603	17.66
Ctrl MO NO	No Overlap	h5b4	10.915	303.042	117.494	640.349	17.66
Ctrl MO NO	No Overlap	h5b4	10.915	284.655	117.135	582.544	17.66
Ctrl MO NO	No Overlap	h5b4	10.915	259.646	130.812	495.08	17.66
Ctrl MO NO	No Overlap
Ctrl MO NO	No Overlap	h5b5	8.916	586.6	241.761	1390.468	14.409
Ctrl MO NO	No Overlap	h5b5	8.916	586.6	241.761	1390.468	14.409
Ctrl MO NO	No Overlap	h5b5	8.916	504.38	193.014	1097.137	14.409
Ctrl MO NO	No Overlap	h5b5	8.916	395.781	200.353	801.248	14.409
Ctrl MO NO	No Overlap	h5b5	8.916	306.932	146.715	837.439	14.409
Ctrl MO NO	No Overlap	h5b5	8.916	236.572	123.682	630.669	14.409
Ctrl MO NO	No Overlap	h6b1	8.97	497.724	183.141	1001.272	14.497
Ctrl MO NO	No Overlap	h6b1	8.97	443.965	150.021	840.354	14.497
Ctrl MO NO	No Overlap	h6b1	8.97	391.508	177.62	841.162	14.497
Ctrl MO NO	No Overlap	h6b1	8.97	334.303	156.29	614.093	14.497
Ctrl MO NO	No Overlap	h6b1	8.97	291.2	130.683	528.15	14.497
Ctrl MO NO	No Overlap	h6b1	8.97	263.507	137.482	501.791	14.497
Ctrl MO NO	No Overlap
Ctrl MO NO	No Overlap	h6b2	9.132	541.239	246.49	1199.323	14.76
Ctrl MO NO	No Overlap	h6b2	9.132	461.458	192.982	1211.283	14.76
Ctrl MO NO	No Overlap	h6b2	9.132	393.954	181.565	1100.156	14.76
Ctrl MO NO	No Overlap	h6b2	9.132	334.741	163.674	701.218	14.76
Ctrl MO NO	No Overlap	h6b2	9.132	293.236	155.995	585.332	14.76
Ctrl MO NO	No Overlap
Ctrl MO NO	No Overlap	h6b3	9.618	691.747	197.415	1818.462	15.551
Ctrl MO NO	No Overlap	h6b3	9.618	587.597	235.725	1407.471	15.551
Ctrl MO NO	No Overlap	h6b3	9.618	487.201	182.477	1404.275	15.551
Ctrl MO NO	No Overlap	h6b3	9.618	406.184	174.011	1142.217	15.551
Ctrl MO NO	No Overlap	h6b3	9.618	335.048	131.645	852.691	15.551
Ctrl MO NO	No Overlap
Ctrl MO NO	No Overlap	h6b4	10.158	661.856	258.585	1833.292	16.389
Ctrl MO NO	No Overlap	h6b4	10.158	628.067	257.205	1788.06	16.389
Ctrl MO NO	No Overlap	h6b4	10.158	534.749	199.738	1483.229	16.389
Ctrl MO NO	No Overlap	h6b4	10.158	450.093	216.429	963.089	16.389
Ctrl MO NO	No Overlap	h6b4	10.158	373.726	206.685	751.127	16.389
Ctrl MO NO	No Overlap
Ctrl MO NO	No Overlap
Ctrl MO NO	No Overlap	h7b1	10.645	209.386	107.635	693.381	17.22
Ctrl MO NO	No Overlap	h7b1	10.645	179.833	100.693	617.578	17.22
Ctrl MO NO	No Overlap	h7b1	11.401	213.424	106.014	518.072	18.45
Ctrl MO NO	No Overlap	h7b1	11.401	183.551	102.729	392.383	18.45
Ctrl MO NO	No Overlap	h7b1	11.401	156.099	98.294	291.473	18.45
Ctrl MO NO	No Overlap
Ctrl MO NO	No Overlap	h7b2	6.646	171.401	102.043	491.532	10.719
Ctrl MO NO	No Overlap	h7b2	6.646	156.162	100.031	283.005	10.719
Ctrl MO NO	No Overlap	h7b2	6.646	137.907	93.072	224.199	10.719
Ctrl MO NO	No Overlap	h7b2	6.646	125.54	94.871	205.237	10.719
Ctrl MO NO	No Overlap	h8b1	9.078	213.441	117.331	492.024	14.672
Ctrl MO NO	No Overlap	h8b1	9.078	180.424	104.926	334.563	14.672
Ctrl MO NO	No Overlap	h8b1	9.078	155.14	98.327	282.993	14.672
Ctrl MO NO	No Overlap	h8b1	9.078	142.365	97.333	226.455	14.672
Ctrl MO NO	No Overlap	h8b1	9.078	135.865	96.89	218.608	14.672
Ctrl MO NO	No Overlap	h8b1	9.078	129.389	96.247	205.279	14.672
Ctrl MO NO	No Overlap	h8b1	9.078	122.795	92.045	188.842	14.672
Ctrl MO NO	No Overlap
Ctrl MO NO	No Overlap	h8b2	6.214	195.948	116.12	457.73	10.006
Ctrl MO NO	No Overlap	h8b2	6.214	172.816	99.893	379.231	10.006
Ctrl MO NO	No Overlap	h8b2	6.214	149.921	101.685	340.058	10.006
Ctrl MO NO	No Overlap	h8b2	6.214	144.486	95.4	304.153	10.006
Ctrl MO NO	No Overlap	h8b2	6.214	137.984	103.591	266.987	10.006
Ctrl MO NO	No Overlap
Ctrl MO NO	No Overlap	h8b3	9.51	132.373	99.272	216.943	15.375
Ctrl MO NO	No Overlap	h8b3	9.51	123.828	96.368	190.379	15.375
Ctrl MO NO	No Overlap	h8b3	9.51	115.783	94.621	192.25	15.375
Ctrl MO NO	No Overlap	h8b3	9.51	109.867	93.857	168.587	15.375
Ctrl MO NO	No Overlap
Ctrl MO NO	No Overlap	h8b4	10.158	166.701	103.46	313.041	16.43
Ctrl MO NO	No Overlap	h8b4	10.158	161.097	97.671	343.29	16.43
Ctrl MO NO	No Overlap	h8b4	10.158	149.983	99.509	301.379	16.43
Ctrl MO NO	No Overlap	h8b4	10.158	138.447	95.812	301.106	16.43
Ctrl MO NO	No Overlap	h8b4	10.158	125.647	94.288	223.269	16.43
Ctrl MO NO	No Overlap	h8b4	10.158	115.697	90.68	185.901	16.43
Ctrl MO NO	No Overlap
Ctrl MO NO	No Overlap	h9b1	10.645	183.486	103.477	416.511	17.217
Ctrl MO NO	No Overlap	h9b1	10.645	174.093	99.659	397.77	17.217
Ctrl MO NO	No Overlap	h9b1	10.645	163.653	96.815	404.089	17.217
Ctrl MO NO	No Overlap	h9b1	10.645	153.307	98.313	361.226	17.217
Ctrl MO NO	No Overlap	h9b1	10.645	142.053	94.968	255.057	17.217
Ctrl MO NO	No Overlap	h9b1	10.645	133.521	94.68	231.875	17.217
Ctrl MO NO	No Overlap
Ctrl MO NO	No Overlap	h9b2	7.349	246.61	123.774	524.201	11.861
Ctrl MO NO	No Overlap	h9b2	7.349	219.715	102.964	518.244	11.861
Ctrl MO NO	No Overlap	h9b2	7.349	192.124	110.265	414.473	11.861
Ctrl MO NO	No Overlap	h9b2	7.349	169.656	101.419	340.955	11.861
Ctrl MO NO	No Overlap
Ctrl MO NO	No Overlap	h9b3	8.429	236.722	111.719	499.822	13.618
Ctrl MO NO	No Overlap	h9b3	8.429	214.268	106.74	520.734	13.618
Ctrl MO NO	No Overlap	h9b3	8.429	195.639	99.642	531.192	13.618
Ctrl MO NO	No Overlap	h9b3	8.429	182.053	102.987	426.021	13.618
Ctrl MO NO	No Overlap	h9b3	8.429	164.997	98.65	352.425	13.618
Ctrl MO NO	No Overlap	h9b3	6.484	248.952	119.637	569.622	10.455
Ctrl MO NO	No Overlap	h9b3	6.484	212.166	112.188	452.538	10.455
Ctrl MO NO	No Overlap	h9b3	6.484	177.599	107.777	330.697	10.455
Ctrl MO NO	No Overlap	h9b3	6.484	160.378	105.321	250.359	10.455
Ecad MO CO	Complete Overlap	h5b1	7.781	536.949	217.35	1557.369	12.564
Ecad MO CO	Complete Overlap	h5b1	7.781	526.553	204.507	1126.908	12.564
Ecad MO CO	Complete Overlap	h5b1	7.781	526.307	214.705	1334.182	12.564
Ecad MO CO	Complete Overlap	h5b1	7.781	523.416	231.677	1264.622	12.564
Ecad MO CO	Complete Overlap	h5b1	7.781	498.859	238.804	1288.964	12.564
Ecad MO CO	Complete Overlap	h5b1	7.781	463.226	216.485	1207.552	12.564
Ecad MO CO	Complete Overlap	h5b1	7.781	419.752	170.831	1089.097	12.564
Ecad MO CO	Complete Overlap	h5b1	7.781	351.052	171.274	853.233	12.564
Ecad MO CO	Complete Overlap
Ecad MO CO	Complete Overlap	h5b2	6.592	650.304	305.482	1593.555	10.631
Ecad MO CO	Complete Overlap	h5b2	6.592	661.143	296.634	1357.834	10.631
Ecad MO CO	Complete Overlap	h5b2	6.592	620.273	296.647	1094.415	10.631
Ecad MO CO	Complete Overlap	h5b2	6.592	578.654	266.187	1022.188	10.631
Ecad MO CO	Complete Overlap	h5b2	6.592	524.91	236.151	885.641	10.631
Ecad MO CO	Complete Overlap	h5b2	6.592	451.535	205.665	766.958	10.631
Ecad MO CO	Complete Overlap	h5b2	6.592	370.591	192.584	671.239	10.631
Ecad MO CO	Complete Overlap
Ecad MO CO	Complete Overlap	h5b3	4.539	1001.1	303.793	2840.504	7.292
Ecad MO CO	Complete Overlap	h5b3	4.539	1061.095	334.72	2391.181	7.292
Ecad MO CO	Complete Overlap	h5b3	4.539	1032.967	352.959	2054.217	7.292
Ecad MO CO	Complete Overlap	h5b3	5.241	936.924	337.085	1700.05	8.434
Ecad MO CO	Complete Overlap	h5b3	5.241	804.577	363.699	1732.107	8.434
Ecad MO CO	Complete Overlap	h5b3	5.241	674.749	320.375	1462.66	8.434
Ecad MO CO	Complete Overlap	h5b3	5.241	595.164	306.298	1390.856	8.434
Ecad MO CO	Complete Overlap	h5b3	5.241	530.064	249.985	1278.049	8.434
Ecad MO CO	Complete Overlap
Ecad MO CO	Complete Overlap	h5b4	6.862	647.746	272.303	2325.497	11.07
Ecad MO CO	Complete Overlap	h5b4	6.862	624.778	266.762	2677.965	11.07
Ecad MO CO	Complete Overlap	h5b4	6.862	594.335	244.595	2307.786	11.07
Ecad MO CO	Complete Overlap	h5b4	6.862	560.338	252.041	1697.621	11.07
Ecad MO CO	Complete Overlap	h5b4	6.862	497.234	166.369	1476.431	11.07
Ecad MO CO	Complete Overlap	h5b4	6.862	447.667	190.746	1249.31	11.07
Ecad MO CO	Complete Overlap	h5b4	6.862	399.071	164.371	960.957	11.07
Ecad MO CO	Complete Overlap	h5b4	6.862	346.361	142.878	934.274	11.07
Ecad MO CO	Complete Overlap
Ecad MO CO	Complete Overlap	h5b5	4.269	533.201	240.704	1096.749	6.853
Ecad MO CO	Complete Overlap	h5b5	4.269	504.679	183.725	1014.81	6.853
Ecad MO CO	Complete Overlap	h5b5	4.269	465.73	207.879	864.433	6.853
Ecad MO CO	Complete Overlap	h5b5	4.269	413.09	207.13	707.345	6.853
Ecad MO CO	Complete Overlap	h5b5	4.269	348.882	190.356	608.702	6.853
Ecad MO CO	Complete Overlap	h5b5	4.269	301.658	178.754	511.394	6.853
Ecad MO CO	Complete Overlap
Ecad MO CO	Complete Overlap	h5b6	8.591	526.614	208.451	1841.919	13.882
Ecad MO CO	Complete Overlap	h5b6	8.591	529.456	227.295	1594.356	13.882
Ecad MO CO	Complete Overlap	h5b6	8.591	510.444	231.371	1244.385	13.882
Ecad MO CO	Complete Overlap	h5b6	8.591	457.983	228.73	990.974	13.882
Ecad MO CO	Complete Overlap	h5b6	8.591	404.872	193.736	860.928	13.882
Ecad MO CO	Complete Overlap	h5b6	8.591	364.172	171.122	733.048	13.882
Ecad MO CO	Complete Overlap	h5b6	8.591	314.821	140.409	573.064	13.882
Ecad MO CO	Complete Overlap	h5b6	8.591	267.394	143.363	467.547	13.882
Ecad MO CO	Complete Overlap
Ecad MO CO	Complete Overlap	h5b7	9.618	500.176	210.98	1868.813	15.551
Ecad MO CO	Complete Overlap	h5b7	9.618	463.572	167.558	1758.61	15.551
Ecad MO CO	Complete Overlap	h5b7	11.725	481.108	166.067	2141.069	18.977
Ecad MO CO	Complete Overlap	h5b7	11.401	493.371	194.802	1407.599	18.419
Ecad MO CO	Complete Overlap	h5b7	11.401	463.515	177.829	1271.358	18.419
Ecad MO CO	Complete Overlap	h5b7	11.401	425.603	186.299	1019.865	18.419
Ecad MO CO	Complete Overlap	h5b7	11.401	385.757	155.097	840.789	18.419
Ecad MO CO	Complete Overlap
Ecad MO CO	Complete Overlap	h5b8	7.673	419.123	166.204	1016.839	12.388
Ecad MO CO	Complete Overlap	h5b8	7.673	444.042	173.439	955.943	12.388
Ecad MO CO	Complete Overlap	h5b8	7.673	451.089	171.254	945.318	12.388
Ecad MO CO	Complete Overlap	h5b8	7.673	444.438	194.3	847.119	12.388
Ecad MO CO	Complete Overlap	h5b8	7.673	426.304	179.113	843.505	12.388
Ecad MO CO	Complete Overlap	h5b8	7.673	412.834	174.121	766.015	12.388
Ecad MO CO	Complete Overlap	h5b8	7.673	390.528	181.295	715.547	12.388
Ecad MO CO	Complete Overlap	h5b8	7.673	371.07	165.515	681.112	12.388
Ecad MO CO	Complete Overlap
Ecad MO CO	Complete Overlap	h5b9	9.24	600.965	205.941	1253.622	14.936
Ecad MO CO	Complete Overlap	h5b9	9.24	583.741	179.246	1272.5	14.936
Ecad MO CO	Complete Overlap	h5b9	9.24	555.382	260.22	1323.687	14.936
Ecad MO CO	Complete Overlap	h5b9	9.24	529.028	185.344	1224.465	14.936
Ecad MO CO	Complete Overlap	h5b9	9.24	492.495	251.512	1249.536	14.936
Ecad MO CO	Complete Overlap	h5b9	9.24	444.592	208.799	868.687	14.936
Ecad MO CO	Complete Overlap	h5b9	9.24	390.174	165.057	752.439	14.936
Ecad MO CO	Complete Overlap
Ecad MO CO	Complete Overlap	h5b10	10.483	642.556	245.106	1790.291	16.957
Ecad MO CO	Complete Overlap	h5b10	10.483	679.579	252.173	2053.709	16.957
Ecad MO CO	Complete Overlap	h5b10	10.483	672.802	264.735	2173.914	16.957
Ecad MO CO	Complete Overlap	h5b10	10.483	633.027	246.741	2115.535	16.957
Ecad MO CO	Complete Overlap	h5b10	9.672	713.148	272.131	2115.834	15.638
Ecad MO CO	Complete Overlap	h5b10	9.672	632.342	225.285	1835.322	15.638
Ecad MO CO	Complete Overlap	h5b10	9.672	573.781	228.016	1628.31	15.638
Ecad MO CO	Complete Overlap	h5b10	9.672	511.841	189.278	1326.473	15.638
Ecad MO CO	Complete Overlap	h5b10	9.672	436.929	175.128	985.358	15.638
Ecad MO CO	Complete Overlap	h5b10	9.672	357.368	158.242	880.051	15.638
Ecad MO CO	Complete Overlap
Ecad MO CO	Complete Overlap	h5b11	10.266	885.553	291.749	2045.361	16.603
Ecad MO CO	Complete Overlap	h5b11	10.266	810.896	306.708	2054.631	16.603
Ecad MO CO	Complete Overlap	h5b11	7.241	877.165	321.716	1897.905	11.685
Ecad MO CO	Complete Overlap	h5b11	7.241	809.209	264.924	1927.342	11.685
Ecad MO CO	Complete Overlap	h5b11	7.241	739.143	306.66	1741.102	11.685
Ecad MO CO	Complete Overlap	h5b11	7.241	652.391	281.086	1839.617	11.685
Ecad MO CO	Complete Overlap	h5b11	7.241	591.605	244.596	1670.413	11.685
Ecad MO CO	Complete Overlap	h5b11	7.241	538.837	234.009	1326.256	11.685
Ecad MO CO	Complete Overlap	h5b11	7.241	469.974	212.227	1025.451	11.685
Ecad MO CO	Complete Overlap
Ecad MO CO	Complete Overlap	h5b12	6.484	780.741	281.46	1830.205	10.455
Ecad MO CO	Complete Overlap	h5b12	6.484	727.269	296.382	1527.566	10.455
Ecad MO CO	Complete Overlap	h5b12	6.484	649.834	258.267	1370.243	10.455
Ecad MO CO	Complete Overlap	h5b12	6.484	568.54	233.974	1083.173	10.455
Ecad MO CO	Complete Overlap	h5b12	6.484	510.67	246	1107.61	10.455
Ecad MO CO	Complete Overlap	h5b12	6.484	462.55	215.76	1087.226	10.455
Ecad MO CO	Complete Overlap	h5b12	6.484	425.962	182.621	1005.516	10.455
Ecad MO CO	Complete Overlap	h5b12	6.484	391.667	181.899	819.097	10.455
Ecad MO CO	Complete Overlap	h6b1	9.726	1064.923	380.62	2724.8	15.727
Ecad MO CO	Complete Overlap	h6b1	9.726	1103.438	464.961	3374.794	15.727
Ecad MO CO	Complete Overlap	h6b1	9.726	884.791	445.925	2181.321	15.727
Ecad MO CO	Complete Overlap	h6b1	9.726	655.583	357.185	1381.934	15.727
Ecad MO CO	Complete Overlap	h6b1	9.726	488.288	244.773	1023.487	15.727
Ecad MO CO	Complete Overlap
Ecad MO CO	Complete Overlap	h6b2	9.942	1006.225	322.638	2395.664	16.078
Ecad MO CO	Complete Overlap	h6b2	9.942	867.525	311.462	2320.347	16.078
Ecad MO CO	Complete Overlap	h6b2	9.942	615.002	246.239	1511.272	16.078
Ecad MO CO	Complete Overlap	h6b2	9.942	395.158	153.265	927.607	16.078
Ecad MO CO	Complete Overlap	h6b2	9.942	315.015	141.504	771.557	16.078
Ecad MO CO	Complete Overlap
Ecad MO CO	Complete Overlap	h6b3	6.646	1444.466	684.207	3420.74	10.719
Ecad MO CO	Complete Overlap	h6b3	6.646	1344.483	616.719	3235.296	10.719
Ecad MO CO	Complete Overlap	h6b3	6.646	916.833	369.591	2217.648	10.719
Ecad MO CO	Complete Overlap	h6b3	6.538	964.459	394.467	2314.462	10.543
Ecad MO CO	Complete Overlap	h6b3	6.538	684.994	304.312	1507.823	10.543
Ecad MO CO	Complete Overlap	h6b3	6.538	485.194	217.794	836.827	10.543
Ecad MO CO	Complete Overlap
Ecad MO CO	Complete Overlap	h6b4	8.159	1268.319	554.201	2341.38	13.179
Ecad MO CO	Complete Overlap	h6b4	8.159	1097.159	416.607	2359.824	13.179
Ecad MO CO	Complete Overlap	h6b4	7.457	875.635	366.677	1930.033	12.037
Ecad MO CO	Complete Overlap	h6b4	7.457	611.411	295.506	1095.798	12.037
Ecad MO CO	Complete Overlap	h6b4	7.457	470.441	182.83	903.299	12.037
Ecad MO CO	Complete Overlap
Ecad MO CO	Complete Overlap	h6b5	8.375	1049.452	402.332	2409.31	13.527
Ecad MO CO	Complete Overlap	h6b5	8.375	916.376	315.635	1787.329	13.527
Ecad MO CO	Complete Overlap	h6b5	8.375	604.802	248.417	1246.451	13.527
Ecad MO CO	Complete Overlap	h6b5	8.375	428.497	197.979	913.969	13.527
Ecad MO CO	Complete Overlap
Ecad MO CO	Complete Overlap	h6b6	7.997	1125.472	428.056	2280.798	12.915
Ecad MO CO	Complete Overlap	h6b6	7.997	950.704	410.209	2254.126	12.915
Ecad MO CO	Complete Overlap	h6b6	7.997	613.133	264.984	1856.147	12.915
Ecad MO CO	Complete Overlap	h6b6	7.997	439.126	186.461	1085.04	12.915
Ecad MO CO	Complete Overlap	h6b6	7.997	357.36	127.05	1067.768	12.915
Ecad MO CO	Complete Overlap	h7b1	15.346	921.112	367.341	2125.711	24.864
Ecad MO CO	Complete Overlap	h7b1	15.346	895.085	334.614	2245.703	24.864
Ecad MO CO	Complete Overlap	h7b1	15.346	800.567	346.875	2253.164	24.864
Ecad MO CO	Complete Overlap	h7b1	15.346	618.006	227.54	1625.803	24.864
Ecad MO CO	Complete Overlap	h7b1	15.346	448.621	238.33	1118.986	24.864
Ecad MO CO	Complete Overlap	h7b1	15.346	350.027	179.902	762.454	24.864
Ecad MO CO	Complete Overlap
Ecad MO CO	Complete Overlap	h7b2	8.105	819.428	304.88	2568.95	13.091
Ecad MO CO	Complete Overlap	h7b2	8.105	765.598	287.207	2024.556	13.091
Ecad MO CO	Complete Overlap	h7b2	8.105	646.131	258.434	1299.87	13.091
Ecad MO CO	Complete Overlap	h7b2	8.105	467.555	195.887	949.402	13.091
Ecad MO CO	Complete Overlap	h7b2	8.105	343.027	177.641	647.172	13.091
Ecad MO CO	Complete Overlap	h7b2	8.105	283.12	138.334	510.644	13.091
Ecad MO CO	Complete Overlap
Ecad MO CO	Complete Overlap	h7b3	9.402	696.073	303.197	1318.925	15.199
Ecad MO CO	Complete Overlap	h7b3	9.402	724.277	327.255	1514.869	15.199
Ecad MO CO	Complete Overlap	h7b3	9.402	702.208	361.987	1370.363	15.199
Ecad MO CO	Complete Overlap	h7b3	9.402	620.856	268.593	1483.549	15.199
Ecad MO CO	Complete Overlap	h7b3	9.402	541.816	252.769	1300.347	15.199
Ecad MO CO	Complete Overlap	h7b3	9.402	458.575	189.527	1207.39	15.199
Ecad MO CO	Complete Overlap
Ecad MO CO	Complete Overlap	h7b4	16.534	1015.705	402.47	2270.957	26.797
Ecad MO CO	Complete Overlap	h7b4	16.534	938.073	399.079	2051.708	26.797
Ecad MO CO	Complete Overlap	h7b4	16.534	809.631	304.635	1859.142	26.797
Ecad MO CO	Complete Overlap	h7b4	16.534	639.052	245.185	1565.402	26.797
Ecad MO CO	Complete Overlap	h7b4	16.534	492.111	213.86	1460.695	26.797
Ecad MO CO	Complete Overlap	h7b4	16.534	397.779	184.876	1209.858	26.797
Ecad MO CO	Complete Overlap	h7b4	16.534	325.993	165.104	1072.95	26.797
Ecad MO CO	Complete Overlap
Ecad MO CO	Complete Overlap	h7b5	3.836	729.703	296.045	1844.088	6.15
Ecad MO CO	Complete Overlap	h7b5	3.836	731.865	301.43	1789.724	6.15
Ecad MO CO	Complete Overlap	h7b5	3.836	644.191	289.562	1464.86	6.15
Ecad MO CO	Complete Overlap	h7b5	3.836	471.262	252.073	944.208	6.15
Ecad MO CO	Complete Overlap	h7b5	3.836	367.675	197.162	735.183	6.15
Ecad MO CO	Complete Overlap	h7b5	3.836	307.27	129.225	514.797	6.15
Ecad MO CO	Complete Overlap
Ecad MO CO	Complete Overlap	h7b6	8.591	852.278	309.438	1977.793	13.879
Ecad MO CO	Complete Overlap	h7b6	8.591	818.751	319.005	2051.935	13.879
Ecad MO CO	Complete Overlap	h7b6	8.591	694.88	230.237	1327.125	13.879
Ecad MO CO	Complete Overlap	h7b6	8.591	525.313	223.057	1007.323	13.879
Ecad MO CO	Complete Overlap	h7b6	8.591	408.687	195.186	737.804	13.879
Ecad MO CO	Complete Overlap	h7b6	8.591	327.794	152.341	575.518	13.879
Ecad MO CO	Complete Overlap	h7b6	8.591	267.078	134.287	423.619	13.879
Ecad MO CO	Complete Overlap
Ecad MO CO	Complete Overlap	h7b7	7.133	995.824	405.24	2276.836	11.509
Ecad MO CO	Complete Overlap	h7b7	7.133	892.51	355.265	2284.242	11.509
Ecad MO CO	Complete Overlap	h7b7	7.133	741.644	311.425	2151.838	11.509
Ecad MO CO	Complete Overlap	h7b7	7.133	574.943	261.9	1694.641	11.509
Ecad MO CO	Complete Overlap	h7b7	7.133	415.299	198.642	1136.167	11.509
Ecad MO CO	Complete Overlap
Ecad MO CO	Complete Overlap	h7b8	7.295	955.191	364.286	2024.936	11.773
Ecad MO CO	Complete Overlap	h7b8	7.295	942.24	451.764	1912.099	11.773
Ecad MO CO	Complete Overlap	h7b8	7.295	824.057	395.978	1979.215	11.773
Ecad MO CO	Complete Overlap	h7b8	7.295	659.875	243.732	1341.386	11.773
Ecad MO CO	Complete Overlap	h7b8	7.295	477.941	249.734	921.552	11.773
Ecad MO CO	Complete Overlap	h7b8	7.295	348.865	186.116	549.062	11.773
Ecad MO CO	Complete Overlap	h7b8	7.295	289.68	156.91	480.793	11.773
Ecad MO CO	Complete Overlap
Ecad MO CO	Complete Overlap	h7b9	11.347	663.605	281.728	1382.536	18.362
Ecad MO CO	Complete Overlap	h7b9	11.347	655.958	321.795	1448.567	18.362
Ecad MO CO	Complete Overlap	h7b9	11.347	595.646	258.935	1318.457	18.362
Ecad MO CO	Complete Overlap	h7b9	11.347	525.192	232.45	1537.018	18.362
Ecad MO CO	Complete Overlap	h7b9	11.347	448.855	190.852	1406.008	18.362
Ecad MO CO	Complete Overlap	h7b9	11.347	379.008	157.205	1134.863	18.362
Ecad MO CO	Complete Overlap	h7b9	11.347	299.039	130.676	770.72	18.362
Ecad MO CO	Complete Overlap
Ecad MO CO	Complete Overlap	h7b10	13.671	932.195	469.85	1735.769	22.14
Ecad MO CO	Complete Overlap	h7b10	13.671	834.224	417.115	1599.272	22.14
Ecad MO CO	Complete Overlap	h7b10	13.671	710.617	260.31	1476.976	22.14
Ecad MO CO	Complete Overlap	h7b10	13.238	762.379	374.755	1498.745	21.437
Ecad MO CO	Complete Overlap	h7b10	13.238	639.382	295.108	1542.807	21.437
Ecad MO CO	Complete Overlap	h7b10	13.238	516.366	223.925	1433.785	21.437
Ecad MO CO	Complete Overlap	h7b10	13.238	420.671	175.339	1244.57	21.437
Ecad MO CO	Complete Overlap	h7b10	13.238	335.285	134.225	1063.173	21.437
Ecad MO CO	Complete Overlap
Ecad MO CO	Complete Overlap	h7b11	6.7	1126.975	492.558	2285.288	10.806
Ecad MO CO	Complete Overlap	h7b11	6.7	1031.077	436.63	2202.783	10.806
Ecad MO CO	Complete Overlap	h7b11	6.7	874.186	394.07	1905.649	10.806
Ecad MO CO	Complete Overlap	h7b11	6.7	638.173	335.933	1409.103	10.806
Ecad MO CO	Complete Overlap	h7b11	6.7	463.581	254.432	785.569	10.806
Ecad MO CO	Complete Overlap	h7b11	6.7	364.195	190.542	552.529	10.806
Ecad MO CO	Complete Overlap
Ecad MO CO	Complete Overlap	h7b12	13.671	488.49	146.737	1374.044	22.14
Ecad MO CO	Complete Overlap	h7b12	13.671	508.79	191.404	1203.051	22.14
Ecad MO CO	Complete Overlap	h7b12	13.671	523.61	197.898	1160.667	22.14
Ecad MO CO	Complete Overlap	h7b12	13.671	502.4	178.399	1132.153	22.14
Ecad MO CO	Complete Overlap	h7b12	13.671	431.402	136.816	1088.861	22.14
Ecad MO CO	Complete Overlap	h8b1	11.725	526.195	232.054	1213.149	18.977
Ecad MO CO	Complete Overlap	h8b1	11.725	582.855	216.11	1527.209	18.977
Ecad MO CO	Complete Overlap	h8b1	11.725	574.745	245.247	1609.219	18.977
Ecad MO CO	Complete Overlap	h8b1	11.725	525.18	207.838	1407.227	18.977
Ecad MO CO	Complete Overlap	h8b1	11.725	449.582	165.856	1044.946	18.977
Ecad MO CO	Complete Overlap	h8b1	11.725	355.468	161.048	784.054	18.977
Ecad MO CO	Complete Overlap	h8b1	11.725	271.157	144.004	511.435	18.977
Ecad MO CO	Complete Overlap	h8b1	11.725	219.864	117.107	382.162	18.977
Ecad MO CO	Complete Overlap
Ecad MO CO	Complete Overlap	h8b2	9.564	528.652	182	1723.163	15.463
Ecad MO CO	Complete Overlap	h8b2	9.564	532.525	164.249	1483.009	15.463
Ecad MO CO	Complete Overlap	h8b2	9.564	500.106	166.81	1266.614	15.463
Ecad MO CO	Complete Overlap	h8b2	9.564	409.835	182.597	902.512	15.463
Ecad MO CO	Complete Overlap
Ecad MO CO	Complete Overlap	h8b3	15.238	427.416	174.208	967.704	24.688
Ecad MO CO	Complete Overlap	h8b3	15.238	423.523	143.047	1065.375	24.688
Ecad MO CO	Complete Overlap	h8b3	15.238	387.087	184.396	955.935	24.688
Ecad MO CO	Complete Overlap	h8b3	15.238	317.034	157.137	696.108	24.688
Ecad MO CO	Complete Overlap	h8b3	13.455	349.798	132.401	1506.859	21.789
Ecad MO CO	Complete Overlap	h8b3	13.455	293.411	114.741	1186.748	21.789
Ecad MO CO	Complete Overlap	h8b3	13.455	239.773	110.286	724.465	21.789
Ecad MO CO	Complete Overlap	h9b1	8.862	580.51	141.978	1483.438	14.321
Ecad MO CO	Complete Overlap	h9b1	8.862	583.42	154.967	2102.54	14.321
Ecad MO CO	Complete Overlap	h9b1	8.862	534.309	172.589	2304.898	14.321
Ecad MO CO	Complete Overlap	h9b1	8.862	477.653	175.149	1895.494	14.321
Ecad MO CO	Complete Overlap	h9b1	8.862	375.7	157.392	1231.082	14.321
Ecad MO CO	Complete Overlap	h9b1	8.862	315.027	123.853	875.755	14.321
Ecad MO CO	Complete Overlap	h9b1	8.862	259.239	124.791	572.951	14.321
Ecad MO CO	Complete Overlap	h9b1	8.862	227.359	114.282	467.445	14.321
Ecad MO CO	Complete Overlap
Ecad MO CO	Complete Overlap	h9b2	10.321	310.203	115.115	791.004	16.693
Ecad MO CO	Complete Overlap	h9b2	10.321	305.152	121.433	616.776	16.693
Ecad MO CO	Complete Overlap	h9b2	10.321	291.05	114.627	698.488	16.693
Ecad MO CO	Complete Overlap	h9b2	10.321	281.045	139.727	936.121	16.693
Ecad MO CO	Complete Overlap	h9b2	10.321	276.316	123.006	1049.018	16.693
Ecad MO CO	Complete Overlap	h9b2	10.321	272.406	114.332	895.465	16.693
Ecad MO CO	Complete Overlap	h9b2	10.321	269.895	112.078	686.356	16.693
Ecad MO CO	Complete Overlap	h9b2	10.321	269.895	112.078	686.356	16.693
Ecad MO CO	Complete Overlap	h9b2	10.321	269.795	111.82	719.381	16.693
Ecad MO CO	Complete Overlap
Ecad MO CO	Complete Overlap	h9b3	8.862	321.968	121.74	1023.569	14.321
Ecad MO CO	Complete Overlap	h9b3	8.862	319.357	137.53	1039.072	14.321
Ecad MO CO	Complete Overlap	h9b3	8.862	307.421	141.882	817.92	14.321
Ecad MO CO	Complete Overlap	h9b3	8.862	289.986	155.724	648.582	14.321
Ecad MO CO	Complete Overlap	h9b3	8.862	264.871	130.284	515.936	14.321
Ecad MO CO	Complete Overlap	h9b3	8.862	241.155	129.828	587.708	14.321
Ecad MO CO	Complete Overlap
Ecad MO CO	Complete Overlap	h9b4	4.701	261.414	125.172	614.128	7.556
Ecad MO CO	Complete Overlap	h9b4	4.701	254.452	134.979	475.943	7.556
Ecad MO CO	Complete Overlap	h9b4	4.701	249.678	133.597	484.994	7.556
Ecad MO CO	Complete Overlap	h9b4	4.701	243.41	117.115	494.828	7.556
Ecad MO CO	Complete Overlap	h9b4	4.701	226.624	113.007	419.902	7.556
Ecad MO CO	Complete Overlap	h9b4	4.701	217.704	119.998	404.515	7.556
Ecad MO CO	Complete Overlap	h9b4	4.701	202.518	119.896	413.115	7.556
Ecad MO CO	Complete Overlap	h9b4	4.701	181.071	104.348	371.598	7.556
Ecad MO CO	Complete Overlap
Ecad MO CO	Complete Overlap	h9b5	7.889	361.212	149.644	1368.677	12.739
Ecad MO CO	Complete Overlap	h9b5	7.889	353.801	134.713	830.373	12.739
Ecad MO CO	Complete Overlap	h9b5	7.889	337.773	133.491	786.772	12.739
Ecad MO CO	Complete Overlap	h9b5	7.889	315.826	137.298	716.334	12.739
Ecad MO CO	Complete Overlap	h9b5	7.889	292.702	129.37	651.301	12.739
Ecad MO CO	Complete Overlap	h9b5	7.889	274.069	117.018	527.13	12.739
Ecad MO CO	Complete Overlap	h9b5	7.889	250.518	119.451	500.653	12.739
Ecad MO CO	Complete Overlap
Ecad MO CO	Complete Overlap	h9b6	10.104	333.949	158.942	866.013	16.342
Ecad MO CO	Complete Overlap	h9b6	10.104	353.641	139.456	1073.329	16.342
Ecad MO CO	Complete Overlap	h9b6	10.104	357.734	153.516	1263.808	16.342
Ecad MO CO	Complete Overlap	h9b6	10.104	344.032	139.04	1379.101	16.342
Ecad MO CO	Complete Overlap	h9b6	10.104	323.034	137.241	1320.456	16.342
Ecad MO CO	Complete Overlap	h9b6	10.104	301.399	124.84	1002.162	16.342
Ecad MO CO	Complete Overlap	h9b6	10.104	273.255	127.774	766.829	16.342
Ecad MO CO	Complete Overlap
Ecad MO CO	Complete Overlap	h9b7	10.05	394.04	156.188	890.2	16.254
Ecad MO CO	Complete Overlap	h9b7	10.05	350.211	152.497	758.953	16.254
Ecad MO CO	Complete Overlap	h9b7	10.05	309.307	149.287	598.467	16.254
Ecad MO CO	Complete Overlap	h9b7	10.05	264.133	132.009	527.684	16.254
Ecad MO CO	Complete Overlap	h9b7	10.05	221.335	108.7	475.774	16.254
Ecad MO CO	Complete Overlap	h9b7	10.05	188.96	115.448	401.765	16.254
Ecad MO CO	Complete Overlap
Ecad MO CO	Complete Overlap	h9b8	4.053	323.307	168.468	721.498	6.502
Ecad MO CO	Complete Overlap	h9b8	4.053	270.23	153.945	602.181	6.502
Ecad MO CO	Complete Overlap	h9b8	4.053	226.098	129.582	460.83	6.502
Ecad MO CO	Complete Overlap	h9b8	4.053	193.47	121.877	337.015	6.502
Ecad MO CO	Complete Overlap	h9b8	4.053	174.898	101.147	289.859	6.502
Ecad MO PO	Partial Overlap	h5b1	10.266	632.92	219.915	1225.915	16.605
Ecad MO PO	Partial Overlap	h5b1	10.266	584.692	201.808	1233.503	16.605
Ecad MO PO	Partial Overlap	h5b1	10.266	523.93	222.642	972.94	16.605
Ecad MO PO	Partial Overlap	h5b1	10.266	478.118	190.723	875.458	16.605
Ecad MO PO	Partial Overlap	h5b1	10.266	402.985	173.235	829.683	16.605
Ecad MO PO	Partial Overlap	h5b1	10.266	335.565	167.529	662.08	16.605
Ecad MO PO	Partial Overlap	h5b1	10.266	284.507	147.835	559.591	16.605
Ecad MO PO	Partial Overlap
Ecad MO PO	Partial Overlap	h5b2	7.619	594.105	248.519	1124.057	12.3
Ecad MO PO	Partial Overlap	h5b2	7.619	525.716	243.08	983.279	12.3
Ecad MO PO	Partial Overlap	h5b2	7.619	466.963	241.995	908.849	12.3
Ecad MO PO	Partial Overlap	h5b2	7.619	405.175	189.112	891.229	12.3
Ecad MO PO	Partial Overlap
Ecad MO PO	Partial Overlap	h5b3	10.861	696.185	207.378	3496.168	17.572
Ecad MO PO	Partial Overlap	h5b3	10.861	693.543	243.495	3551.189	17.572
Ecad MO PO	Partial Overlap	h5b3	10.861	669.876	245.208	2697.844	17.572
Ecad MO PO	Partial Overlap	h5b3	10.861	637.84	259.443	1787.362	17.572
Ecad MO PO	Partial Overlap	h5b3	10.861	590.263	246.522	1590.076	17.572
Ecad MO PO	Partial Overlap	h5b3	10.861	550.822	216.883	1586.189	17.572
Ecad MO PO	Partial Overlap	h5b3	10.861	526.224	216.986	1410.518	17.572
Ecad MO PO	Partial Overlap	h5b3	10.861	480.34	194.626	1128.837	17.572
Ecad MO PO	Partial Overlap	h5b3	10.861	435.279	165.596	1070.499	17.572
Ecad MO PO	Partial Overlap
Ecad MO PO	Partial Overlap	h5b4	7.511	594.658	169.06	1649.169	12.125
Ecad MO PO	Partial Overlap	h5b4	7.511	560.79	186.754	1292.733	12.125
Ecad MO PO	Partial Overlap	h5b4	7.511	519.826	174.19	1313.783	12.125
Ecad MO PO	Partial Overlap	h5b4	7.511	486.471	179.684	1025.069	12.125
Ecad MO PO	Partial Overlap	h5b4	7.511	442.803	180.954	960.108	12.125
Ecad MO PO	Partial Overlap	h5b4	7.511	392.904	184.101	919.216	12.125
Ecad MO PO	Partial Overlap	h5b4	7.511	348.863	159.278	725.917	12.125
Ecad MO PO	Partial Overlap	h5b4	7.511	319.203	153.508	761.439	12.125
Ecad MO PO	Partial Overlap	h5b4	7.511	273.839	130.077	729.178	12.125
Ecad MO PO	Partial Overlap
Ecad MO PO	Partial Overlap	h5b5	7.457	805.997	270.13	2557.121	12.037
Ecad MO PO	Partial Overlap	h5b5	7.457	825.644	302.94	2058.274	12.037
Ecad MO PO	Partial Overlap	h5b5	7.457	786.673	273.497	1574.189	12.037
Ecad MO PO	Partial Overlap	h5b5	7.457	705.819	298.488	1458.863	12.037
Ecad MO PO	Partial Overlap	h5b5	7.457	613.653	284.866	1245.366	12.037
Ecad MO PO	Partial Overlap	h5b5	7.457	549.044	274.613	1068.178	12.037
Ecad MO PO	Partial Overlap	h5b5	7.457	500.506	259.637	1012.676	12.037
Ecad MO PO	Partial Overlap	h6b1	9.402	1257.281	497.532	2780.464	15.171
Ecad MO PO	Partial Overlap	h6b1	9.402	1285.988	430.992	2892.171	15.171
Ecad MO PO	Partial Overlap	h6b1	9.402	1069.974	437.127	2547.466	15.171
Ecad MO PO	Partial Overlap	h6b1	9.402	784.113	306.516	1386.593	15.171
Ecad MO PO	Partial Overlap	h6b1	9.402	649.376	345.304	1104.547	15.171
Ecad MO PO	Partial Overlap
Ecad MO PO	Partial Overlap	h6b2	11.347	1105.036	478.304	2588.564	18.362
Ecad MO PO	Partial Overlap	h6b2	11.347	907.953	409.273	2126.351	18.362
Ecad MO PO	Partial Overlap	h6b2	11.347	662.99	358.586	1267.895	18.362
Ecad MO PO	Partial Overlap	h6b2	11.347	508.028	243.401	1007.01	18.362
Ecad MO PO	Partial Overlap	h6b2	11.347	420.104	165.628	819.434	18.362
Ecad MO PO	Partial Overlap
Ecad MO PO	Partial Overlap	h6b3	11.563	772.933	343.762	1844.758	18.714
Ecad MO PO	Partial Overlap	h6b3	11.563	766.599	379.418	1574.268	18.714
Ecad MO PO	Partial Overlap	h6b3	11.563	595.409	277.127	1298.878	18.714
Ecad MO PO	Partial Overlap	h6b3	11.563	406.892	148.2	1151.112	18.714
Ecad MO PO	Partial Overlap	h6b3	11.563	326.476	159.877	1082.265	18.714
Ecad MO PO	Partial Overlap	h7b1	8.7	1009.584	397.945	1789.648	14.057
Ecad MO PO	Partial Overlap	h7b1	8.7	930.394	379.641	1740.827	14.057
Ecad MO PO	Partial Overlap	h7b1	8.7	799.658	262.658	1682.061	14.057
Ecad MO PO	Partial Overlap	h7b1	8.7	621.13	225.687	1541.423	14.057
Ecad MO PO	Partial Overlap	h7b1	8.7	453.392	162.564	1080.424	14.057
Ecad MO PO	Partial Overlap	h7b1	8.7	352.736	110.737	780.232	14.057
Ecad MO PO	Partial Overlap
Ecad MO PO	Partial Overlap	h7b2	10.807	832.484	384.23	1649.512	17.484
Ecad MO PO	Partial Overlap	h7b2	10.807	734.483	266.844	1537.133	17.484
Ecad MO PO	Partial Overlap	h7b2	10.807	628.997	233.079	1472.154	17.484
Ecad MO PO	Partial Overlap	h7b2	10.807	514.643	204.397	1523.675	17.484
Ecad MO PO	Partial Overlap	h7b2	10.807	385.254	162.685	970.913	17.484
Ecad MO PO	Partial Overlap	h7b2	10.807	299.733	133.638	623.248	17.484
Ecad MO PO	Partial Overlap	h7b2	10.807	262.176	120.849	512.326	17.484
Ecad MO PO	Partial Overlap
Ecad MO PO	Partial Overlap	h7b3	8.97	682.811	306.976	1233.574	14.494
Ecad MO PO	Partial Overlap	h7b3	8.97	588.214	285.131	1197.384	14.494
Ecad MO PO	Partial Overlap	h7b3	8.97	481.67	255.171	908.937	14.494
Ecad MO PO	Partial Overlap	h7b3	8.97	355.933	196.616	674.815	14.494
Ecad MO PO	Partial Overlap	h7b3	8.97	279.756	151.309	560.751	14.494
Ecad MO PO	Partial Overlap	h7b3	8.97	239.274	148.348	451.065	14.494
Ecad MO PO	Partial Overlap
Ecad MO PO	Partial Overlap	h7b4	3.89	895.896	480.738	1757.694	6.238
Ecad MO PO	Partial Overlap	h7b4	3.89	866.539	399.487	1547.288	6.238
Ecad MO PO	Partial Overlap	h7b4	3.89	762.322	426.936	1509.138	6.238
Ecad MO PO	Partial Overlap	h7b4	3.89	604.557	303.167	1304.937	6.238
Ecad MO PO	Partial Overlap	h7b4	3.89	456.069	238.345	796.583	6.238
Ecad MO PO	Partial Overlap	h7b4	3.89	355.074	184.366	578.519	6.238
Ecad MO PO	Partial Overlap	h7b4	3.89	286.454	157.98	458.411	6.238
Ecad MO PO	Partial Overlap
Ecad MO PO	Partial Overlap	h7b5	7.727	911.808	395.754	1880.317	12.476
Ecad MO PO	Partial Overlap	h7b5	7.727	766.909	306.21	1596.783	12.476
Ecad MO PO	Partial Overlap	h7b5	7.727	577.626	260.1	1387.983	12.476
Ecad MO PO	Partial Overlap	h7b5	7.727	439.543	191.655	889.895	12.476
Ecad MO PO	Partial Overlap	h7b5	7.727	373.975	180.989	655.68	12.476
Ecad MO PO	Partial Overlap	h7b5	7.727	323.808	169.628	539.39	12.476
Ecad MO PO	Partial Overlap
Ecad MO PO	Partial Overlap	h7b6	9.024	944.785	399.471	2134.657	14.585
Ecad MO PO	Partial Overlap	h7b6	9.024	768.339	296.021	2050.02	14.585
Ecad MO PO	Partial Overlap	h7b6	9.024	635.625	237.931	1507.898	14.585
Ecad MO PO	Partial Overlap	h7b6	9.024	510.275	198.153	1094.027	14.585
Ecad MO PO	Partial Overlap	h7b6	9.024	402.921	179.645	846.919	14.585
Ecad MO PO	Partial Overlap	h7b6	9.024	310.071	148.866	520.44	14.585
Ecad MO PO	Partial Overlap	h7b6	9.024	264.709	138.679	442.987	14.585
Ecad MO PO	Partial Overlap	h8b1	4.863	743.948	245.394	2200.579	7.819
Ecad MO PO	Partial Overlap	h8b1	4.863	637.418	263.686	1943.565	7.819
Ecad MO PO	Partial Overlap	h8b1	4.863	541.496	248.749	1638.748	7.819
Ecad MO PO	Partial Overlap	h8b1	4.863	437.814	182.452	1295.988	7.819
Ecad MO PO	Partial Overlap	h8b1	4.863	333.243	148.809	649.481	7.819
Ecad MO PO	Partial Overlap	h8b1	4.863	252.002	118.752	414.411	7.819
Ecad MO PO	Partial Overlap
Ecad MO PO	Partial Overlap	h8b2	12.158	294.698	123.504	773.227	19.68
Ecad MO PO	Partial Overlap	h8b2	12.158	278.316	135.481	832.844	19.68
Ecad MO PO	Partial Overlap	h8b2	12.158	249.341	119.277	655.95	19.68
Ecad MO PO	Partial Overlap	h8b2	12.158	223.651	101.87	584.589	19.68
Ecad MO PO	Partial Overlap	h8b2	12.158	194.929	99.382	414.982	19.68
Ecad MO PO	Partial Overlap
Ecad MO PO	Partial Overlap	h8b3	10.104	394.081	166.276	952.198	16.342
Ecad MO PO	Partial Overlap	h8b3	10.104	383.602	156.151	765.288	16.342
Ecad MO PO	Partial Overlap	h8b3	10.104	357.314	143.437	705.631	16.342
Ecad MO PO	Partial Overlap	h8b3	10.104	307.012	140.175	643.565	16.342
Ecad MO PO	Partial Overlap	h8b3	10.104	256.684	130.726	490.731	16.342
Ecad MO PO	Partial Overlap	h8b3	10.104	217.755	113.278	424.223	16.342
Ecad MO PO	Partial Overlap
Ecad MO PO	Partial Overlap	h8b4	15.508	286.679	123.522	779.008	25.128
Ecad MO PO	Partial Overlap	h8b4	15.508	261.215	107.553	887.423	25.128
Ecad MO PO	Partial Overlap	h8b4	15.508	236.662	98.196	849.321	25.128
Ecad MO PO	Partial Overlap	h8b4	15.508	208.84	100.378	537.477	25.128
Ecad MO PO	Partial Overlap
Ecad MO PO	Partial Overlap	h9b1	6.268	324.208	165.952	779.432	10.104
Ecad MO PO	Partial Overlap	h9b1	6.268	275.114	155.499	550.365	10.104
Ecad MO PO	Partial Overlap	h9b1	6.268	241.771	122.896	418.086	10.104
Ecad MO PO	Partial Overlap	h9b1	6.268	221.202	128.598	392.785	10.104
Ecad MO PO	Partial Overlap	h9b1	6.268	201.204	124.136	372.265	10.104
Ecad MO PO	Partial Overlap	h9b1	6.268	177.592	113.765	353.658	10.104
Ecad MO PO	Partial Overlap
Ecad MO PO	Partial Overlap	h9b2	7.078	274.485	116.58	607.909	11.422
Ecad MO PO	Partial Overlap	h9b2	7.078	239.059	119.097	557.351	11.422
Ecad MO PO	Partial Overlap	h9b2	7.078	202.573	116.037	382.302	11.422
Ecad MO PO	Partial Overlap	h9b2	7.078	179.958	113.824	294.35	11.422
Ecad MO PO	Partial Overlap	h9b2	7.078	162.154	103.043	272.63	11.422
Ecad MO PO	Partial Overlap	h9b2	7.078	150.916	103.703	266.773	11.422
Ecad MO PO	Partial Overlap
Ecad MO PO	Partial Overlap	h9b3	9.618	191.226	105.272	427.487	15.551
Ecad MO PO	Partial Overlap	h9b3	9.618	175.577	105.04	342.944	15.551
Ecad MO PO	Partial Overlap	h9b3	9.618	162.444	103.918	268.716	15.551
Ecad MO PO	Partial Overlap	h9b3	9.618	151.724	104.39	251.085	15.551
Ecad MO PO	Partial Overlap	h9b3	9.618	141.676	94.93	246.294	15.551
Ecad MO PO	Partial Overlap
Ecad MO PO	Partial Overlap	h9b4	7.403	280.892	125.282	743.956	11.902
Ecad MO PO	Partial Overlap	h9b4	7.403	240.005	115.234	451.068	11.902
Ecad MO PO	Partial Overlap	h9b4	7.403	208.379	121.327	425.897	11.902
Ecad MO PO	Partial Overlap	h9b4	7.403	189.248	108.783	381.701	11.902
Ecad MO PO	Partial Overlap	h9b4	7.403	175.212	102.421	395.481	11.902
Ecad MO PO	Partial Overlap	h9b4	7.403	167.088	102.182	373.39	11.902
Ecad MO PO	Partial Overlap
Ecad MO PO	Partial Overlap	h9b5	11.833	300.179	137.646	692.764	19.153
Ecad MO PO	Partial Overlap	h9b5	11.833	267.737	132.719	608.065	19.153
Ecad MO PO	Partial Overlap	h9b5	11.833	237.823	120.309	574.029	19.153
Ecad MO PO	Partial Overlap	h9b5	11.833	199.747	112.804	470.542	19.153
Ecad MO PO	Partial Overlap
Ecad MO PO	Partial Overlap	h9b6	6.484	231.35	107.704	467.076	10.455
Ecad MO PO	Partial Overlap	h9b6	6.484	211.834	104.434	439.402	10.455
Ecad MO PO	Partial Overlap	h9b6	6.484	196.399	106.253	451.659	10.455
Ecad MO PO	Partial Overlap	h9b6	6.484	178.156	103.163	432.868	10.455
Ecad MO PO	Partial Overlap	h9b6	6.484	164.38	93.721	377.4	10.455
Ecad MO PO	Partial Overlap
Ecad MO PO	Partial Overlap	h9b7	7.024	232.337	115.335	451.206	11.334
Ecad MO PO	Partial Overlap	h9b7	7.024	218.258	119.989	420.516	11.334
Ecad MO PO	Partial Overlap	h9b7	7.024	203.019	114.575	401.282	11.334
Ecad MO PO	Partial Overlap	h9b7	7.024	187.922	110.699	390.157	11.334
Ecad MO NO	No Overlap	h5b1	10.861	541.753	188.348	1484.839	17.572
Ecad MO NO	No Overlap	h5b1	10.861	535.043	202.493	1074.329	17.572
Ecad MO NO	No Overlap	h5b1	10.861	514.581	193.549	1054.196	17.572
Ecad MO NO	No Overlap	h5b1	10.861	487.734	229.963	1005.904	17.572
Ecad MO NO	No Overlap	h5b1	10.861	449.922	225.638	921.169	17.572
Ecad MO NO	No Overlap	h5b1	10.861	409.046	172.929	806.388	17.572
Ecad MO NO	No Overlap	h5b1	10.861	366.181	167.198	769.38	17.572
Ecad MO NO	No Overlap	h5b1	10.861	325.522	153.997	631.444	17.572
Ecad MO NO	No Overlap	h5b1	10.861	272.601	142.6	521.594	17.572
Ecad MO NO	No Overlap
Ecad MO NO	No Overlap	h5b2	6.646	539.871	238.154	1026.49	10.719
Ecad MO NO	No Overlap	h5b2	6.646	505.571	225.236	969.679	10.719
Ecad MO NO	No Overlap	h5b2	6.646	469.909	173.948	903.194	10.719
Ecad MO NO	No Overlap	h5b2	6.646	423.598	177.2	893.576	10.719
Ecad MO NO	No Overlap	h5b2	6.646	380.709	171.471	841.403	10.719
Ecad MO NO	No Overlap	h5b2	6.646	349.932	135.66	786.65	10.719
Ecad MO NO	No Overlap	h5b2	6.646	301.021	144.699	777.592	10.719
Ecad MO NO	No Overlap
Ecad MO NO	No Overlap	h5b3	8.105	395.217	148.317	1062.86	13.084
Ecad MO NO	No Overlap	h5b3	8.105	373.048	143.485	1032.671	13.084
Ecad MO NO	No Overlap	h5b3	8.105	342.991	121.957	941.866	13.084
Ecad MO NO	No Overlap	h5b3	8.105	305.541	118.827	847.668	13.084
Ecad MO NO	No Overlap	h5b3	8.105	269.796	119.462	642.911	13.084
Ecad MO NO	No Overlap
Ecad MO NO	No Overlap	h5b4	8.267	420.993	192.27	745.533	13.354
Ecad MO NO	No Overlap	h5b4	8.267	404.027	173.893	742.914	13.354
Ecad MO NO	No Overlap	h5b4	8.267	385.211	149.454	735.908	13.354
Ecad MO NO	No Overlap	h5b4	8.267	357.304	155.919	656.58	13.354
Ecad MO NO	No Overlap	h5b4	8.267	321.389	152.429	602.427	13.354
Ecad MO NO	No Overlap	h5b4	8.267	280.711	158.861	558.715	13.354
Ecad MO NO	No Overlap	h5b4	8.267	235.224	118.905	495.74	13.354
Ecad MO NO	No Overlap
Ecad MO NO	No Overlap	h5b5	8.591	441.961	155.393	841.894	13.882
Ecad MO NO	No Overlap	h5b5	8.591	430.045	166.264	874.101	13.882
Ecad MO NO	No Overlap	h5b5	8.591	406.81	188.752	748.301	13.882
Ecad MO NO	No Overlap	h5b5	8.591	390.939	207.612	740.264	13.882
Ecad MO NO	No Overlap	h5b5	8.591	355.701	186.06	620.075	13.882
Ecad MO NO	No Overlap	h5b5	8.591	315.315	152.827	634.104	13.882
Ecad MO NO	No Overlap
Ecad MO NO	No Overlap	h5b6	4.701	326.062	0	650.587	7.556
Ecad MO NO	No Overlap	h5b6	4.701	334.719	0	660.103	7.556
Ecad MO NO	No Overlap	h5b6	4.701	338.656	0	658.457	7.556
Ecad MO NO	No Overlap	h5b6	4.701	329.831	0	629.551	7.556
Ecad MO NO	No Overlap	h5b6	4.701	310.316	0	678.512	7.556
Ecad MO NO	No Overlap	h5b6	4.701	291.102	0	664.477	7.556
Ecad MO NO	No Overlap
Ecad MO NO	No Overlap
Ecad MO NO	No Overlap
Ecad MO NO	No Overlap
Ecad MO NO	No Overlap
Ecad MO NO	No Overlap
Ecad MO NO	No Overlap	h6b1	12.104	1128.559	513.534	2143.057	19.592
Ecad MO NO	No Overlap	h6b1	12.104	951.247	472.369	1946.549	19.592
Ecad MO NO	No Overlap	h6b1	12.104	689.116	336.335	1340.724	19.592
Ecad MO NO	No Overlap	h6b1	12.104	500.532	203.125	1007.28	19.592
Ecad MO NO	No Overlap	h6b1	12.104	407.313	175.92	846.255	19.592
Ecad MO NO	No Overlap
Ecad MO NO	No Overlap	h6b2	9.51	1138.858	505.2	2045.21	15.375
Ecad MO NO	No Overlap	h6b2	9.51	1100.921	458.888	2223.674	15.375
Ecad MO NO	No Overlap	h6b2	9.51	838.662	382.665	1968.287	15.375
Ecad MO NO	No Overlap	h6b2	9.51	523.944	232.811	1095.086	15.375
Ecad MO NO	No Overlap
Ecad MO NO	No Overlap	h6b3	12.158	826.502	309.681	2414.436	19.68
Ecad MO NO	No Overlap	h6b3	12.158	607.819	238.028	2164.562	19.68
Ecad MO NO	No Overlap	h6b3	12.158	410.566	180.342	1047.135	19.68
Ecad MO NO	No Overlap	h6b3	12.158	323.401	151.831	832.633	19.68
Ecad MO NO	No Overlap
Ecad MO NO	No Overlap	h6b4	8.808	1016.158	454.612	2293.424	14.233
Ecad MO NO	No Overlap	h6b4	8.808	956.136	390.021	1958.18	14.233
Ecad MO NO	No Overlap	h6b4	8.808	690.495	297.547	1447.949	14.233
Ecad MO NO	No Overlap	h6b4	8.808	476.179	185.007	855.726	14.233
Ecad MO NO	No Overlap	h6b4	8.808	412.04	141.013	878.86	14.233
Ecad MO NO	No Overlap
Ecad MO NO	No Overlap	h6b5	7.295	617.38	306.02	1231.616	11.773
Ecad MO NO	No Overlap	h6b5	7.295	502.914	268.7	875.906	11.773
Ecad MO NO	No Overlap	h6b5	7.295	420.779	208.206	918.702	11.773
Ecad MO NO	No Overlap	h6b5	7.295	368.469	157.981	834.835	11.773
Ecad MO NO	No Overlap
Ecad MO NO	No Overlap	h6b6	6.214	657.065	409.31	1385.564	10.016
Ecad MO NO	No Overlap	h6b6	6.214	533.737	313.311	838.901	10.016
Ecad MO NO	No Overlap	h6b6	6.214	430.305	220.476	891.681	10.016
Ecad MO NO	No Overlap	h6b6	6.214	359.544	190.358	628.308	10.016
Ecad MO NO	No Overlap	h7b1	9.888	737.801	253.329	1772.968	15.99
Ecad MO NO	No Overlap	h7b1	9.888	662.244	267.113	1404.466	15.99
Ecad MO NO	No Overlap	h7b1	9.888	570.452	262.266	1199.018	15.99
Ecad MO NO	No Overlap	h7b1	9.888	473.393	211.844	1050.66	15.99
Ecad MO NO	No Overlap	h7b1	9.888	391.257	193.37	787.441	15.99
Ecad MO NO	No Overlap	h7b1	9.888	323.851	186.463	547.081	15.99
Ecad MO NO	No Overlap
Ecad MO NO	No Overlap	h7b2	9.726	983.423	413.015	2056.933	15.727
Ecad MO NO	No Overlap	h7b2	9.726	856.937	377.674	1745.555	15.727
Ecad MO NO	No Overlap	h7b2	9.726	715.199	327.909	1368.36	15.727
Ecad MO NO	No Overlap	h7b2	9.726	562.793	254.423	1079.077	15.727
Ecad MO NO	No Overlap	h7b2	9.726	442.461	213.493	908.921	15.727
Ecad MO NO	No Overlap	h7b2	9.726	364.199	181.313	729.728	15.727
Ecad MO NO	No Overlap	h7b2	9.726	305.305	127.133	589.137	15.727
Ecad MO NO	No Overlap
Ecad MO NO	No Overlap	h7b3	8.105	1053.868	421.371	2552.525	13.084
Ecad MO NO	No Overlap	h7b3	8.105	1048.537	455.763	2495.514	13.084
Ecad MO NO	No Overlap	h7b3	8.105	980.075	415.253	2268.345	13.084
Ecad MO NO	No Overlap	h7b3	8.105	848.866	343.314	1676.752	13.084
Ecad MO NO	No Overlap	h7b3	8.105	720.453	287.41	1451.744	13.084
Ecad MO NO	No Overlap	h7b3	8.105	591.1	255.827	1286.779	13.084
Ecad MO NO	No Overlap	h7b3	8.105	469.486	237.371	1042.408	13.084
Ecad MO NO	No Overlap	h7b3	8.105	351.699	168.258	705.466	13.084
Ecad MO NO	No Overlap
Ecad MO NO	No Overlap
Ecad MO NO	No Overlap
Ecad MO NO	No Overlap	h8b1	15.4	298.33	142.593	899.894	24.952
Ecad MO NO	No Overlap	h8b1	15.4	249.152	108.267	924.788	24.952
Ecad MO NO	No Overlap	h8b1	15.4	210.999	113.254	471.59	24.952
Ecad MO NO	No Overlap	h8b1	15.4	188.855	107.01	405.603	24.952
Ecad MO NO	No Overlap
Ecad MO NO	No Overlap	h8b2	10.753	302.762	138.778	671.656	17.396
Ecad MO NO	No Overlap	h8b2	10.753	254.287	114.391	578.511	17.396
Ecad MO NO	No Overlap	h8b2	10.753	207.387	117.38	430.853	17.396
Ecad MO NO	No Overlap	h8b2	10.753	180.748	106.059	343.94	17.396
Ecad MO NO	No Overlap
Ecad MO NO	No Overlap	h8b3	13.563	304.82	134.142	724.761	21.965
Ecad MO NO	No Overlap	h8b3	13.563	255.199	143.372	560.713	21.965
Ecad MO NO	No Overlap	h8b3	13.563	218.297	127.471	533.3	21.965
Ecad MO NO	No Overlap	h8b3	13.563	218.297	127.471	533.3	21.965
Ecad MO NO	No Overlap
Ecad MO NO	No Overlap	h8b4	12.644	369.998	149.063	799.698	20.471
Ecad MO NO	No Overlap	h8b4	12.644	299.957	135.708	820.526	20.471
Ecad MO NO	No Overlap	h8b4	12.644	249.496	117.348	569.18	20.471
Ecad MO NO	No Overlap	h8b4	12.644	211.701	118.956	466.913	20.471
Ecad MO NO	No Overlap	h8b4	12.644	182.127	108.455	301.082	20.471
Ecad MO NO	No Overlap	h8b4	12.644	167.881	101.371	278.174	20.471
Ecad MO NO	No Overlap	h9b1	9.888	225.489	100.147	778.34	15.99
[truncated: 4 more rows]
