# Supplementary material for: Stepwise polarisation of developing bilayered epidermis is mediated by aPKC and E-cadherin in zebrafish
Source: eLife. 2020 Jan 22;9:e49064. doi: 10.7554/eLife.49064 (PMC6975926; doi:10.7554/eLife.49064)
Supplement: Figure 5—source data 3. [file elife-49064-fig5-data3.csv]

Genotype	Boundary	Cell name	Area	Mean	Min	Max	Length
Ctrl MO C-C	Clone- Clone	h1b1	9.78	616.866	105.379	2151.594	15.814
Ctrl MO C-C	Clone- Clone	h1b1	9.78	481.26	54.532	1740.777	15.814
Ctrl MO C-C	Clone- Clone	h1b1	9.78	328.152	65.176	853.16	15.814
Ctrl MO C-C	Clone- Clone	h1b1	9.78	335.332	59.405	1203.965	15.814
Ctrl MO C-C	Clone- Clone
Ctrl MO C-C	Clone- Clone	h1b2	11.023	471.052	42.698	2540.362	17.835
Ctrl MO C-C	Clone- Clone	h1b2	11.023	393.587	18.763	2642.92	17.835
Ctrl MO C-C	Clone- Clone	h1b2	11.023	338.509	16.487	1952.613	17.835
Ctrl MO C-C	Clone- Clone	h1b2	11.023	279.854	1.513	2084.467	17.835
Ctrl MO C-C	Clone- Clone	h1b2	11.023	207.15	8.618	1157.664	17.835
Ctrl MO C-C	Clone- Clone	h1b2	11.023	180.328	8.734	1362.289	17.835
Ctrl MO C-C	Clone- Clone
Ctrl MO C-C	Clone- Clone	h1b3	8.645	340.87	51.302	1517.423	13.969
Ctrl MO C-C	Clone- Clone	h1b3	8.645	240.718	33.573	742.502	13.969
Ctrl MO C-C	Clone- Clone	h1b3	8.645	211.518	15.58	749.795	13.969
Ctrl MO C-C	Clone- Clone
Ctrl MO C-C	Clone- Clone	h1b4	13.238	813.075	139.116	2931.091	21.437
Ctrl MO C-C	Clone- Clone	h1b4	13.238	748.106	90.89	3192.426	21.437
Ctrl MO C-C	Clone- Clone	h1b4	13.238	599.186	112.349	3339.997	21.437
Ctrl MO C-C	Clone- Clone	h1b4	13.238	359.413	68.073	1785.693	21.437
Ctrl MO C-C	Clone- Clone	h1b4	13.238	242.662	25.302	1118.391	21.437
Ctrl MO C-C	Clone- Clone	h2b1	10.158	903.136	193.79	3856.349	16.429
Ctrl MO C-C	Clone- Clone	h2b1	10.158	860.568	200.489	2848.525	16.429
Ctrl MO C-C	Clone- Clone	h2b1	10.158	754.933	183.589	2535.371	16.429
Ctrl MO C-C	Clone- Clone	h2b1	10.158	505.506	108.299	1951.814	16.429
Ctrl MO C-C	Clone- Clone	h2b1	10.158	374.167	69.983	2006.073	16.429
Ctrl MO C-C	Clone- Clone
Ctrl MO C-C	Clone- Clone	h2b2	11.888	799.227	97.023	3164.404	19.241
Ctrl MO C-C	Clone- Clone	h2b2	11.888	738.056	108.485	3212.21	19.241
Ctrl MO C-C	Clone- Clone	h2b2	11.888	465.725	84.819	2116.158	19.241
Ctrl MO C-C	Clone- Clone	h2b2	11.888	324.218	61.423	1291.713	19.241
Ctrl MO C-C	Clone- Clone	h2b2	11.888	313.161	39.93	1403.675	19.241
Ctrl MO C-C	Clone- Clone
Ctrl MO C-C	Clone- Clone	h2b3	9.348	762.727	175.897	2761.642	15.112
Ctrl MO C-C	Clone- Clone	h2b3	9.348	762.727	175.897	2761.642	15.112
Ctrl MO C-C	Clone- Clone	h2b3	9.348	672.62	144.39	1944.809	15.112
Ctrl MO C-C	Clone- Clone	h2b3	9.348	528.432	86.162	1814.876	15.112
Ctrl MO C-C	Clone- Clone	h2b3	9.348	460.967	81.239	1492.22	15.112
Ctrl MO C-C	Clone- Clone	h2b3	9.348	401.457	63.471	1449.032	15.112
Ctrl MO C-C	Clone- Clone
Ctrl MO C-C	Clone- Clone	h2b4	10.537	607.854	139.767	2873.454	17.044
Ctrl MO C-C	Clone- Clone	h2b4	10.537	613.551	143.435	1776.737	17.044
Ctrl MO C-C	Clone- Clone	h2b4	10.537	609.214	113.064	2135.844	17.044
Ctrl MO C-C	Clone- Clone	h2b4	10.537	533.46	130.423	2865.391	17.044
Ctrl MO C-C	Clone- Clone	h2b4	10.537	441.36	70.272	2968.86	17.044
Ctrl MO C-C	Clone- Clone
Ctrl MO C-C	Clone- Clone	h2b5	5.782	513.538	54.926	2179.614	9.313
Ctrl MO C-C	Clone- Clone	h2b5	5.782	392.454	58.843	2213.871	9.313
Ctrl MO C-C	Clone- Clone	h2b5	5.782	296.646	29.485	2498.253	9.313
Ctrl MO C-C	Clone- Clone	h2b5	5.782	260.268	22.216	2357.804	9.313
Ctrl MO C-C	Clone- Clone	h2b5	5.782	205.501	14.044	956.562	9.313
Ctrl MO C-C	Clone- Clone
Ctrl MO C-C	Clone- Clone	h2b6	9.726	787.344	168.528	2999.326	15.723
Ctrl MO C-C	Clone- Clone	h2b6	9.726	540.047	117.012	1965.108	15.723
Ctrl MO C-C	Clone- Clone	h2b6	9.726	358.399	72.548	1320.34	15.723
Ctrl MO C-C	Clone- Clone	h2b6	9.726	289.289	39.52	1432.397	15.723
Ctrl MO C-C	Clone- Clone	h3b1	5.782	916.505	178.368	3417.472	9.313
Ctrl MO C-C	Clone- Clone	h3b1	5.782	926.935	234.982	3867.172	9.313
Ctrl MO C-C	Clone- Clone	h3b1	5.782	635.465	134.666	2346.743	9.313
Ctrl MO C-C	Clone- Clone	h3b1	5.782	576.013	144.123	2089.806	9.313
Ctrl MO C-C	Clone- Clone
Ctrl MO C-C	Clone- Clone	h3b2	8.105	968.65	126.856	3804.907	13.091
Ctrl MO C-C	Clone- Clone	h3b2	8.105	815.136	168.952	2870.929	13.091
Ctrl MO C-C	Clone- Clone	h3b2	8.105	596.725	166.649	2456.047	13.091
Ctrl MO C-C	Clone- Clone	h3b2	8.105	487.676	161.27	2520.785	13.091
Ctrl MO C-C	Clone- Clone	h3b2	8.105	482.433	83.043	4095	13.091
Ctrl MO C-C	Clone- Clone
Ctrl MO C-C	Clone- Clone	h3b3	9.996	907.761	142.108	3811.747	16.166
Ctrl MO C-C	Clone- Clone	h3b3	9.996	475.137	92.414	1590.43	16.166
Ctrl MO C-C	Clone- Clone	h3b3	9.996	394.821	41.921	2594.542	16.166
Ctrl MO C-C	Clone- Clone	h3b3	9.996	407.748	35.7	3092.391	16.166
Ctrl MO C-C	Clone- Clone
Ctrl MO C-C	Clone- Clone	h3b4	7.457	783.676	147.962	2519.839	12.037
Ctrl MO C-C	Clone- Clone	h3b4	7.457	579.708	162.969	3381.202	12.037
Ctrl MO C-C	Clone- Clone	h3b4	7.457	440.08	116.169	4094.176	12.037
Ctrl MO C-C	Clone- Clone
Ctrl MO C-C	Clone- Clone	h3b5	11.888	555.965	48.484	3827.849	19.241
Ctrl MO C-C	Clone- Clone	h3b5	11.888	430.628	68.236	2118.645	19.241
Ctrl MO C-C	Clone- Clone	h3b5	11.888	318.898	39.78	1520.015	19.241
Ctrl MO C-C	Clone- Clone	h3b5	11.888	281.731	25.252	2239.556	19.241
Ctrl MO C-C	Clone- Clone	h4b1	11.671	448.995	43.074	2529.614	18.89
Ctrl MO C-C	Clone- Clone	h4b1	11.671	430.439	73.686	2089.467	18.89
Ctrl MO C-C	Clone- Clone	h4b1	11.671	414.996	55.608	2401.529	18.89
Ctrl MO C-C	Clone- Clone	h4b1	11.671	416.222	64.065	3287.94	18.89
Ctrl MO C-C	Clone- Clone	h4b1	11.671	395.048	62.546	3597.311	18.89
Ctrl MO C-C	Clone- Clone	h4b1	11.671	401.2	74.644	2486.214	18.89
Ctrl MO C-C	Clone- Clone
Ctrl MO C-C	Clone- Clone	h4b2	6.916	520.393	79.697	2069.369	11.158
Ctrl MO C-C	Clone- Clone	h4b2	6.916	493.342	77.244	2929.188	11.158
Ctrl MO C-C	Clone- Clone	h4b2	6.916	460.41	85.734	2906.266	11.158
Ctrl MO C-C	Clone- Clone	h4b2	6.916	415.103	77.628	2563.577	11.158
Ctrl MO C-C	Clone- Clone	h4b2	6.916	327.302	60.538	1806.957	11.158
Ctrl MO C-C	Clone- Clone	h4b2	6.916	269.27	51.036	2542.994	11.158
Ctrl MO C-C	Clone- Clone
Ctrl MO C-C	Clone- Clone	h4b3	10.969	312.462	29.41	1427.825	17.747
Ctrl MO C-C	Clone- Clone	h4b3	10.969	286.496	27.596	1146.762	17.747
Ctrl MO C-C	Clone- Clone	h4b3	10.969	261.553	34.025	2135.292	17.747
Ctrl MO C-C	Clone- Clone	h4b3	10.969	247.484	25.987	1832.216	17.747
Ctrl MO C-C	Clone- Clone
Ctrl MO C-C	Clone- Clone	h4b4	9.024	500.356	90.989	2216.83	14.585
Ctrl MO C-C	Clone- Clone	h4b4	9.024	580.17	69.442	3097.945	14.585
Ctrl MO C-C	Clone- Clone	h4b4	9.024	422.656	48.061	1368.254	14.585
Ctrl MO C-C	Clone- Clone	h4b4	9.024	321.219	54.963	864.286	14.585
Ctrl MO C-C	Clone- Clone	h4b4	9.024	262.41	12.646	812.516	14.585
Ctrl MO C-C	Clone- Clone
Ctrl MO C-C	Clone- Clone	h4b5	12.05	820.034	141.788	3886.314	19.504
Ctrl MO C-C	Clone- Clone	h4b5	12.05	819.144	137.007	3719.666	19.504
Ctrl MO C-C	Clone- Clone	h4b5	12.05	735.222	115.111	3017.597	19.504
Ctrl MO C-C	Clone- Clone	h4b5	12.05	562.645	55.866	2392.551	19.504
Ctrl MO C-C	Clone- Clone	h4b5	12.05	399.723	77.685	2395.235	19.504
Ctrl MO C-C	Clone- Clone	h4b5	12.05	377.763	62.325	2531.557	19.504
Ctrl MO C-C	Clone- Clone
Ctrl MO C-C	Clone- Clone	h4b6	6.268	788.611	178.672	2363.848	10.104
Ctrl MO C-C	Clone- Clone	h4b6	6.268	509.214	145.024	2592.729	10.104
Ctrl MO C-C	Clone- Clone	h4b6	6.268	408.809	99.968	1269.104	10.104
Ctrl MO C-C	Clone- Clone	h4b6	6.268	322.078	45.35	1143.96	10.104
Ctrl MO C-C	Clone- Clone	h5b1	6.808	959.079	260.438	3327.351	10.978
Ctrl MO C-C	Clone- Clone	h5b1	6.808	722.832	198.379	3434.755	10.978
Ctrl MO C-C	Clone- Clone	h5b1	6.808	377.939	88.723	932.984	10.978
Ctrl MO C-C	Clone- Clone	h5b1	6.808	226.849	59.721	895.868	10.978
Ctrl MO C-C	Clone- Clone	h5b1	6.808	182.97	37.939	627.111	10.978
Ctrl MO C-C	Clone- Clone	h5b1	6.808	149.206	20.144	720.106	10.978
Ctrl MO C-C	Clone- Clone
Ctrl MO C-C	Clone- Clone	h5b2	10.699	883.438	111.721	2868.156	17.308
Ctrl MO C-C	Clone- Clone	h5b2	10.699	345.905	14.864	1085.89	17.308
Ctrl MO C-C	Clone- Clone	h5b2	10.699	178.937	5.897	827.823	17.308
Ctrl MO C-C	Clone- Clone	h5b2	10.699	106.787	4.306	1787.697	17.308
Ctrl MO C-C	Clone- Clone
Ctrl MO C-C	Clone- Clone	h5b3	6.808	280.07	72.451	1556.735	10.982
Ctrl MO C-C	Clone- Clone	h5b3	6.808	156.5	12.927	1036.647	10.982
Ctrl MO C-C	Clone- Clone	h5b3	6.808	125.176	5.917	660.509	10.982
Ctrl MO C-C	Clone- Clone	h5b3	6.808	111.247	4.7	765.015	10.982
Ctrl MO C-C	Clone- Clone
Ctrl MO C-C	Clone- Clone	h5b4	9.726	874.339	119.284	4095	15.727
Ctrl MO C-C	Clone- Clone	h5b4	9.726	619.061	60.96	3278.675	15.727
Ctrl MO C-C	Clone- Clone	h5b4	9.726	367.578	40.38	1553.286	15.727
Ctrl MO C-C	Clone- Clone	h5b4	9.726	292.935	14.76	2054.171	15.727
Ctrl MO C-C	Clone- Clone	h5b4	9.726	245.469	6.93	2042.787	15.727
Ctrl MO C-C	Clone- Clone
Ctrl MO C-C	Clone- Clone	h5b5	11.293	645.101	84.243	4095	18.275
Ctrl MO C-C	Clone- Clone	h5b5	11.293	541.352	78.784	2570.992	18.275
Ctrl MO C-C	Clone- Clone	h5b5	11.293	420.926	77.317	2760.18	18.275
Ctrl MO C-C	Clone- Clone	h5b5	11.293	396.406	45.177	2807.228	18.275
Ctrl MO C-C	Clone- Clone	h5b5	11.293	379.951	41.15	2962.367	18.275
Ctrl MO C-C	Clone- Clone
Ctrl MO C-C	Clone- Clone	h5b6	10.05	1241.179	425.248	3160.63	16.254
Ctrl MO C-C	Clone- Clone	h5b6	10.05	949.343	266.941	3509.815	16.254
Ctrl MO C-C	Clone- Clone	h5b6	10.05	653.3	132.936	2049.033	16.254
Ctrl MO C-C	Clone- Clone	h5b6	10.05	573.876	98.27	1840.795	16.254
Ctrl MO C-C	Clone- Clone	h5b6	10.05	561.631	62.617	2845.967	16.254
Ctrl MO C-C	Clone- Clone
Ctrl MO C-C	Clone- Clone	h5b7	9.942	975.358	199.53	3064.234	16.078
Ctrl MO C-C	Clone- Clone	h5b7	9.942	843.429	157.681	3118.336	16.078
Ctrl MO C-C	Clone- Clone	h5b7	9.942	613.353	104.133	3200.738	16.078
Ctrl MO C-C	Clone- Clone	h5b7	9.942	347.586	65.258	1670.151	16.078
Ctrl MO C-C	Clone- Clone	h5b7	9.942	263.125	50.377	1097.21	16.078
Ctrl MO C-C	Clone- Clone
Ctrl MO C-C	Clone- Clone	h5b8	7.511	660.73	165.508	2215.84	12.124
Ctrl MO C-C	Clone- Clone	h5b8	7.511	556.611	108.175	2484.558	12.124
Ctrl MO C-C	Clone- Clone	h5b8	7.511	450.69	122.9	2265.208	12.124
Ctrl MO C-C	Clone- Clone	h5b8	7.511	384.342	85.619	1355.745	12.124
Ctrl MO C-C	Clone- Clone	h5b8	7.511	385.103	81.244	1931.265	12.124
Ctrl MO C-C	Clone- Clone	h5b8	7.511	351.082	39.263	1596.516	12.124
Ctrl MO C-C	Clone- Clone
Ctrl MO C-C	Clone- Clone	h5b9	9.942	683.567	99.769	2989.302	16.078
Ctrl MO C-C	Clone- Clone	h5b9	9.942	727.48	66.38	3379.243	16.078
Ctrl MO C-C	Clone- Clone	h5b9	9.942	651.871	79.756	2439.957	16.078
Ctrl MO C-C	Clone- Clone	h5b9	9.942	525.095	96.473	2545.268	16.078
Ctrl MO C-C	Clone- Clone	h5b9	9.942	395.052	71.383	3241.042	16.078
Ctrl MO C-C	Clone- Clone	h5b9	9.942	244.773	30.821	843.411	16.078
Ctrl MO C-C	Clone- Clone
Ctrl MO C-C	Clone- Clone	h5b10	6.484	557.726	126.904	1656.7	10.455
Ctrl MO C-C	Clone- Clone	h5b10	6.484	523.908	58.584	1635.287	10.455
Ctrl MO C-C	Clone- Clone	h5b10	6.484	468.117	61.992	2426.268	10.455
Ctrl MO C-C	Clone- Clone	h5b10	6.484	397.692	53.378	1915.404	10.455
Ctrl MO C-C	Clone- Clone	h5b10	6.484	319.226	43.622	2489.273	10.455
Ctrl MO C-C	Clone- Clone	h5b10	6.484	263.871	27.747	1216.696	10.455
Ctrl MO C-C	Clone- Clone
Ctrl MO C-C	Clone- Clone	h5b11	11.239	1179.682	278.964	4095	18.187
Ctrl MO C-C	Clone- Clone	h5b11	11.239	933.192	174.583	3275.165	18.187
Ctrl MO C-C	Clone- Clone	h5b11	11.239	606.982	131.2	3040.808	18.187
Ctrl MO C-C	Clone- Clone	h5b11	11.239	420.735	78.077	2065.617	18.187
Ctrl MO C-C	Clone- Clone	h5b11	11.239	364.859	62.55	1522.191	18.187
Ctrl MO C-C	Clone- Clone
Ctrl MO C-C	Clone- Clone	h5b12	7.349	762.228	176.097	3397.226	11.861
Ctrl MO C-C	Clone- Clone	h5b12	7.349	411.207	124.331	1915.316	11.861
Ctrl MO C-C	Clone- Clone	h5b12	7.349	241.088	18.076	1059.984	11.861
Ctrl MO C-C	Clone- Clone	h5b12	7.349	191.301	25.372	1563.24	11.861
Ctrl MO C-C	Clone- Clone	h5b12	7.349	153.223	16.504	990.05	11.861
Ctrl MO C-C	Clone- Clone
Ctrl MO C-C	Clone- Clone	h5b13	8.754	628.125	86.436	3721.065	14.145
Ctrl MO C-C	Clone- Clone	h5b13	8.754	418.804	63.258	1900.041	14.145
Ctrl MO C-C	Clone- Clone	h5b13	8.754	330.475	36.094	1712.354	14.145
Ctrl MO C-C	Clone- Clone	h5b13	8.754	254.129	12.925	1224.907	14.145
Ctrl MO C-C	Clone- Clone	h5b13	8.754	198.844	4.872	1075.667	14.145
Ctrl MO C-C	Clone- Clone
Ctrl MO C-C	Clone- Clone	h5b14	3.242	736.227	197.751	2784.231	5.184
Ctrl MO C-C	Clone- Clone	h5b14	3.242	403.832	108.419	1032.507	5.184
Ctrl MO C-C	Clone- Clone	h5b14	3.242	195.011	38.112	477.932	5.184
Ctrl MO C-C	Clone- Clone	h5b14	3.242	143.372	29.716	390.787	5.184
Ctrl MO C-C	Clone- Clone	h5b14	3.242	105.62	16.015	316.985	5.184
Ctrl MO C-C	Clone- Clone	h6b1	9.132	403.8	52.893	1866.344	14.76
Ctrl MO C-C	Clone- Clone	h6b1	9.132	329.636	18.144	2176.161	14.76
Ctrl MO C-C	Clone- Clone	h6b1	9.132	234.683	27.837	948.396	14.76
Ctrl MO C-C	Clone- Clone	h6b1	9.132	160.588	12.763	831.703	14.76
Ctrl MO C-C	Clone- Clone	h6b1	9.132	114.937	8.585	693.859	14.76
Ctrl MO C-C	Clone- Clone	h6b1	9.132	95.681	0.108	485.629	14.76
Ctrl MO C-C	Clone- Clone
Ctrl MO C-C	Clone- Clone	h6b2	7.457	581.391	61.487	2828.61	12.037
Ctrl MO C-C	Clone- Clone	h6b2	7.457	475.434	48.913	1610.441	12.037
Ctrl MO C-C	Clone- Clone	h6b2	7.457	351.869	48.737	1227.01	12.037
Ctrl MO C-C	Clone- Clone	h6b2	7.457	236.904	11.579	1137.583	12.037
Ctrl MO C-C	Clone- Clone	h6b2	7.457	176.229	28.154	741.019	12.037
Ctrl MO C-C	Clone- Clone	h6b2	7.457	145.172	5.083	867.398	12.037
Ctrl MO C-C	Clone- Clone	h7b1	7.997	707.023	136.501	3225.791	12.915
Ctrl MO C-C	Clone- Clone	h7b1	7.997	665.491	93.005	3236.748	12.915
Ctrl MO C-C	Clone- Clone	h7b1	7.997	483.962	90.063	1795.698	12.915
Ctrl MO C-C	Clone- Clone	h7b1	7.997	302.013	39.22	1635.569	12.915
Ctrl MO C-C	Clone- Clone	h7b1	7.997	272.17	66.416	1001.269	12.915
Ctrl MO C-C	Clone- Clone
Ctrl MO C-C	Clone- Clone	h7b2	15.4	630.913	100.139	4031.132	24.952
Ctrl MO C-C	Clone- Clone	h7b2	15.4	452.894	62.215	2183.14	24.952
Ctrl MO C-C	Clone- Clone	h7b2	15.4	370.991	44.686	1561.296	24.952
Ctrl MO C-C	Clone- Clone	h7b2	15.4	301.574	50.507	1125.044	24.952
Ctrl MO N-C	Non Clone- Clone	h1b1	8.051	621.02	100.857	1985.429	13.003
Ctrl MO N-C	Non Clone- Clone	h1b1	8.051	578.086	73.597	2303.523	13.003
Ctrl MO N-C	Non Clone- Clone	h1b1	8.051	522.84	94.118	1690.785	13.003
Ctrl MO N-C	Non Clone- Clone	h1b1	8.051	409.545	74.304	1325.219	13.003
Ctrl MO N-C	Non Clone- Clone	h1b1	8.051	310.877	42.316	1090.237	13.003
Ctrl MO N-C	Non Clone- Clone
Ctrl MO N-C	Non Clone- Clone	h1b2	5.674	678.807	141.197	1906.941	9.137
Ctrl MO N-C	Non Clone- Clone	h1b2	5.674	505.25	107.816	1358.765	9.137
Ctrl MO N-C	Non Clone- Clone	h1b2	5.674	349.616	65.196	1010.859	9.137
Ctrl MO N-C	Non Clone- Clone	h1b2	5.674	211.009	28.385	759.559	9.137
Ctrl MO N-C	Non Clone- Clone
Ctrl MO N-C	Non Clone- Clone	h1b3	8.267	1008.249	150.369	3245.67	13.354
Ctrl MO N-C	Non Clone- Clone	h1b3	8.267	794.194	193.934	2746.041	13.354
Ctrl MO N-C	Non Clone- Clone	h1b3	8.267	634.894	155.953	2504.277	13.354
Ctrl MO N-C	Non Clone- Clone	h1b3	8.267	472.034	79.112	2352.31	13.354
Ctrl MO N-C	Non Clone- Clone
Ctrl MO N-C	Non Clone- Clone	h1b4	9.888	759.017	167.022	3579.058	15.99
Ctrl MO N-C	Non Clone- Clone	h1b4	9.888	537.328	111.13	2308.681	15.99
Ctrl MO N-C	Non Clone- Clone	h1b4	9.888	402.922	78.918	1553.594	15.99
Ctrl MO N-C	Non Clone- Clone	h1b4	9.888	365.485	56.819	1987.247	15.99
Ctrl MO N-C	Non Clone- Clone	h1b4	9.888	324.101	44.888	2251.014	15.99
Ctrl MO N-C	Non Clone- Clone
Ctrl MO N-C	Non Clone- Clone	h1b5	4.863	414.412	83.275	1321.065	7.819
Ctrl MO N-C	Non Clone- Clone	h1b5	4.863	217.119	51.181	833.195	7.819
Ctrl MO N-C	Non Clone- Clone	h1b5	4.863	162.734	19.745	510.62	7.819
Ctrl MO N-C	Non Clone- Clone	h1b5	4.863	127.601	16.269	633.687	7.819
Ctrl MO N-C	Non Clone- Clone	h1b5	4.863	129.268	17.376	768.047	7.819
Ctrl MO N-C	Non Clone- Clone
Ctrl MO N-C	Non Clone- Clone	h1b6	6.862	1001.06	162.536	4095	11.07
Ctrl MO N-C	Non Clone- Clone	h1b6	6.862	722.211	141.683	4081.589	11.07
Ctrl MO N-C	Non Clone- Clone	h1b6	6.862	383.496	62.833	2298.857	11.07
Ctrl MO N-C	Non Clone- Clone	h1b6	6.862	269.776	36.757	1177.333	11.07
Ctrl MO N-C	Non Clone- Clone	h2b1	16.48	960.976	153.025	3845.345	26.709
Ctrl MO N-C	Non Clone- Clone	h2b1	16.48	742.593	147.401	3700.085	26.709
Ctrl MO N-C	Non Clone- Clone	h2b1	16.48	422.446	51.561	1891.467	26.709
Ctrl MO N-C	Non Clone- Clone	h2b1	16.48	241.053	19.543	1053.774	26.709
Ctrl MO N-C	Non Clone- Clone	h2b1	16.48	191.002	16.678	976.417	26.709
Ctrl MO N-C	Non Clone- Clone
Ctrl MO N-C	Non Clone- Clone	h2b2	7.457	675.15	158.89	2026.737	12.037
Ctrl MO N-C	Non Clone- Clone	h2b2	7.457	846.278	223.976	2529.174	12.037
Ctrl MO N-C	Non Clone- Clone	h2b2	7.457	825.624	143.817	2350.556	12.037
Ctrl MO N-C	Non Clone- Clone	h2b2	7.457	630.452	127.705	2287.748	12.037
Ctrl MO N-C	Non Clone- Clone	h2b2	7.457	514.924	132.038	1488.499	12.037
Ctrl MO N-C	Non Clone- Clone
Ctrl MO N-C	Non Clone- Clone	h2b3	6.376	857.599	124.454	2283.62	10.279
Ctrl MO N-C	Non Clone- Clone	h2b3	6.376	688.407	155.944	1998.916	10.279
Ctrl MO N-C	Non Clone- Clone	h2b3	6.376	541.491	87.42	1644.772	10.279
Ctrl MO N-C	Non Clone- Clone	h2b3	6.376	449.35	76.422	1329.019	10.279
Ctrl MO N-C	Non Clone- Clone	h2b3	6.376	369.535	51.345	896.19	10.279
Ctrl MO N-C	Non Clone- Clone
Ctrl MO N-C	Non Clone- Clone	h2b4	11.185	404.99	65.205	1784.776	18.099
Ctrl MO N-C	Non Clone- Clone	h2b4	11.185	667.312	89.236	3201.024	18.099
Ctrl MO N-C	Non Clone- Clone	h2b4	11.185	1104.661	107.376	4095	18.099
Ctrl MO N-C	Non Clone- Clone	h2b4	11.185	525.089	102.814	1593.8	18.099
Ctrl MO N-C	Non Clone- Clone	h2b4	11.185	425.92	114.568	1675.388	18.099
Ctrl MO N-C	Non Clone- Clone	h2b4	11.185	494.308	106.283	2456.523	18.099
Ctrl MO N-C	Non Clone- Clone
Ctrl MO N-C	Non Clone- Clone	h2b5	6.808	696.86	92.329	4036.745	10.982
Ctrl MO N-C	Non Clone- Clone	h2b5	6.808	490.191	79.857	2037.475	10.982
Ctrl MO N-C	Non Clone- Clone	h2b5	6.808	271.915	36.184	746.208	10.982
Ctrl MO N-C	Non Clone- Clone	h2b5	6.808	239.799	32.016	1393.479	10.982
Ctrl MO N-C	Non Clone- Clone	h2b5	6.808	227.092	20.18	2016.468	10.982
Ctrl MO N-C	Non Clone- Clone
Ctrl MO N-C	Non Clone- Clone	h2b6	10.212	436.416	96.196	2339.836	16.517
Ctrl MO N-C	Non Clone- Clone	h2b6	10.212	447.413	61.26	2742.658	16.517
Ctrl MO N-C	Non Clone- Clone	h2b6	10.212	419.351	18.668	2367.176	16.517
Ctrl MO N-C	Non Clone- Clone	h2b6	10.212	382.924	19.059	1965.459	16.517
Ctrl MO N-C	Non Clone- Clone	h2b6	10.212	323.311	16.678	1288.01	16.517
Ctrl MO N-C	Non Clone- Clone
Ctrl MO N-C	Non Clone- Clone	h2b7	8.375	607.29	50.736	3010.618	13.53
Ctrl MO N-C	Non Clone- Clone	h2b7	8.375	544.782	87.498	2421.444	13.53
Ctrl MO N-C	Non Clone- Clone	h2b7	8.375	457.189	54.32	2723.365	13.53
Ctrl MO N-C	Non Clone- Clone	h2b7	8.375	350.993	23.161	1696.002	13.53
Ctrl MO N-C	Non Clone- Clone	h2b7	8.375	277.581	11.457	1211.417	13.53
Ctrl MO N-C	Non Clone- Clone
Ctrl MO N-C	Non Clone- Clone	h2b8	5.457	725.387	178.766	2445.736	8.786
Ctrl MO N-C	Non Clone- Clone	h2b8	5.457	822.495	162.618	2971.664	8.786
Ctrl MO N-C	Non Clone- Clone	h2b8	5.457	657.432	212.611	2117.821	8.786
Ctrl MO N-C	Non Clone- Clone	h2b8	5.457	484.723	151.283	1283.429	8.786
Ctrl MO N-C	Non Clone- Clone	h2b8	5.457	359.423	124.938	877.901	8.786
Ctrl MO N-C	Non Clone- Clone
Ctrl MO N-C	Non Clone- Clone	h2b9	10.375	492.298	42.629	2752.506	16.781
Ctrl MO N-C	Non Clone- Clone	h2b9	10.375	395.165	33.131	1657.025	16.781
Ctrl MO N-C	Non Clone- Clone	h2b9	10.375	261.094	21.233	1229.394	16.781
Ctrl MO N-C	Non Clone- Clone	h2b9	10.375	211.345	15.896	1257.133	16.781
Ctrl MO N-C	Non Clone- Clone	h2b9	10.375	196.872	3.823	1538.527	16.781
Ctrl MO N-C	Non Clone- Clone
Ctrl MO N-C	Non Clone- Clone	h2b10	13.617	967.945	155.879	3916.457	22.052
Ctrl MO N-C	Non Clone- Clone	h2b10	13.617	1004.516	125.014	3988.048	22.052
Ctrl MO N-C	Non Clone- Clone	h2b10	13.617	861.306	156.196	3890.892	22.052
Ctrl MO N-C	Non Clone- Clone	h2b10	13.617	509.569	56.439	2142.438	22.052
Ctrl MO N-C	Non Clone- Clone	h2b10	13.617	283.117	35.17	1213.044	22.052
Ctrl MO N-C	Non Clone- Clone	h2b10	13.617	212.78	25.246	1238.908	22.052
Ctrl MO N-C	Non Clone- Clone	h3b1	5.836	352.401	58.447	1508.28	9.401
Ctrl MO N-C	Non Clone- Clone	h3b1	5.836	244.607	63.145	666.968	9.401
Ctrl MO N-C	Non Clone- Clone	h3b1	5.836	213.024	44.931	865.761	9.401
Ctrl MO N-C	Non Clone- Clone
Ctrl MO N-C	Non Clone- Clone	h3b2	7.781	374.933	40.133	1692.376	12.564
Ctrl MO N-C	Non Clone- Clone	h3b2	7.781	273.71	60.881	902.909	12.564
Ctrl MO N-C	Non Clone- Clone	h3b2	7.781	235.362	45.662	918.985	12.564
Ctrl MO N-C	Non Clone- Clone	h3b2	7.781	221.41	29.147	1511.256	12.564
Ctrl MO N-C	Non Clone- Clone	h3b2	7.781	252.498	21.358	3279.267	12.564
Ctrl MO N-C	Non Clone- Clone
Ctrl MO N-C	Non Clone- Clone	h3b3	5.403	421.556	101.05	1316.189	8.698
Ctrl MO N-C	Non Clone- Clone	h3b3	5.403	351.935	82.365	1228.945	8.698
Ctrl MO N-C	Non Clone- Clone	h3b3	5.403	436.003	104.063	4091.86	8.698
Ctrl MO N-C	Non Clone- Clone	h3b3	5.403	444.45	115.046	4077.263	8.698
Ctrl MO N-C	Non Clone- Clone
Ctrl MO N-C	Non Clone- Clone	h3b4	13.779	569.251	153.572	1918.282	22.316
Ctrl MO N-C	Non Clone- Clone	h3b4	13.779	396.214	74.218	3136.422	22.316
Ctrl MO N-C	Non Clone- Clone	h3b4	13.779	391.086	37.354	4000.205	22.316
Ctrl MO N-C	Non Clone- Clone	h3b4	13.779	395.017	28.628	4095	22.316
Ctrl MO N-C	Non Clone- Clone
Ctrl MO N-C	Non Clone- Clone	h3b5	7.835	1053.581	115.229	4095	12.652
Ctrl MO N-C	Non Clone- Clone	h3b5	7.835	1044.65	104.516	4095	12.652
Ctrl MO N-C	Non Clone- Clone	h3b5	7.835	956.793	93.946	3503.325	12.652
Ctrl MO N-C	Non Clone- Clone	h3b5	7.835	725.842	119.915	3115.112	12.652
Ctrl MO N-C	Non Clone- Clone	h3b5	7.835	396.442	77.782	1303.005	12.652
Ctrl MO N-C	Non Clone- Clone	h3b5	7.835	255.119	36.257	1501.813	12.652
Ctrl MO N-C	Non Clone- Clone
Ctrl MO N-C	Non Clone- Clone	h3b6	9.834	652.25	99.22	2769.083	15.902
Ctrl MO N-C	Non Clone- Clone	h3b6	9.834	441.272	27.33	3845.908	15.902
Ctrl MO N-C	Non Clone- Clone	h3b6	9.132	317.145	49.937	986.002	14.757
Ctrl MO N-C	Non Clone- Clone
Ctrl MO N-C	Non Clone- Clone	h3b7	10.212	599.564	50.875	1982.616	16.517
Ctrl MO N-C	Non Clone- Clone	h3b7	10.212	611.301	80.549	2762.891	16.517
Ctrl MO N-C	Non Clone- Clone	h3b7	10.212	446.72	63.972	1758.381	16.517
Ctrl MO N-C	Non Clone- Clone	h3b7	10.212	260.347	40.277	847.046	16.517
Ctrl MO N-C	Non Clone- Clone	h3b7	10.212	215.26	41.312	896.443	16.517
Ctrl MO N-C	Non Clone- Clone
Ctrl MO N-C	Non Clone- Clone	h3b8	7.673	587.092	26.987	3513.049	12.381
Ctrl MO N-C	Non Clone- Clone	h3b8	7.673	561.482	118.448	2647.395	12.381
Ctrl MO N-C	Non Clone- Clone	h3b8	7.673	374.001	82.113	1056.779	12.381
Ctrl MO N-C	Non Clone- Clone	h3b8	7.673	225.862	41.46	926.832	12.381
Ctrl MO N-C	Non Clone- Clone	h3b8	7.673	181.503	42.334	651.482	12.381
Ctrl MO N-C	Non Clone- Clone
Ctrl MO N-C	Non Clone- Clone	h3b9	9.564	582.088	54.286	2499.046	15.463
Ctrl MO N-C	Non Clone- Clone	h3b9	9.564	327.552	47.818	1671.662	15.463
Ctrl MO N-C	Non Clone- Clone	h3b9	9.564	192.662	26.824	726.833	15.463
Ctrl MO N-C	Non Clone- Clone	h3b9	9.564	169.818	23.958	471.422	15.463
Ctrl MO N-C	Non Clone- Clone
Ctrl MO N-C	Non Clone- Clone	h3b10	8.7	613.086	22.191	2869.291	14.057
Ctrl MO N-C	Non Clone- Clone	h3b10	8.7	503.006	54.477	2521.229	14.057
Ctrl MO N-C	Non Clone- Clone	h3b10	8.7	370.729	25.109	1068.571	14.057
Ctrl MO N-C	Non Clone- Clone	h3b10	8.7	338.784	39.384	1287.75	14.057
Ctrl MO N-C	Non Clone- Clone
Ctrl MO N-C	Non Clone- Clone	h3b11	8.105	671.694	165.443	2344.479	13.091
Ctrl MO N-C	Non Clone- Clone	h3b11	8.105	651.984	148.11	3011.302	13.091
Ctrl MO N-C	Non Clone- Clone	h3b11	8.105	598.509	121.215	3731.984	13.091
Ctrl MO N-C	Non Clone- Clone	h3b11	8.105	507.106	97.18	2116.038	13.091
Ctrl MO N-C	Non Clone- Clone	h3b11	8.105	405.084	84.188	1364.67	13.091
Ctrl MO N-C	Non Clone- Clone
Ctrl MO N-C	Non Clone- Clone	h3b12	7.024	1216.309	177.638	4095	11.333
Ctrl MO N-C	Non Clone- Clone	h3b12	7.024	1022.218	220.42	3193.335	11.333
Ctrl MO N-C	Non Clone- Clone	h3b12	7.024	807.199	194.34	2513.108	11.333
Ctrl MO N-C	Non Clone- Clone	h3b12	7.024	546.918	127.572	2024.228	11.333
Ctrl MO N-C	Non Clone- Clone	h4b1	10.321	570.294	49.449	3391.086	16.693
Ctrl MO N-C	Non Clone- Clone	h4b1	10.321	659.068	113.276	3892.957	16.693
Ctrl MO N-C	Non Clone- Clone	h4b1	10.321	562.72	66.331	2710.619	16.693
Ctrl MO N-C	Non Clone- Clone	h4b1	10.321	427.749	52.102	1571.782	16.693
Ctrl MO N-C	Non Clone- Clone	h4b1	10.321	292.973	43.95	878.778	16.693
Ctrl MO N-C	Non Clone- Clone
Ctrl MO N-C	Non Clone- Clone	h4b2	6.754	409.534	54.719	2028.191	10.894
Ctrl MO N-C	Non Clone- Clone	h4b2	6.754	308.904	69.695	1245.145	10.894
Ctrl MO N-C	Non Clone- Clone	h4b2	6.754	219.789	41.259	723.03	10.894
Ctrl MO N-C	Non Clone- Clone	h4b2	6.754	150.499	23.582	460.262	10.894
Ctrl MO N-C	Non Clone- Clone
Ctrl MO N-C	Non Clone- Clone	h4b3	8.862	620.314	101.879	2002.233	14.321
Ctrl MO N-C	Non Clone- Clone	h4b3	8.862	542.54	111.075	1764.272	14.321
Ctrl MO N-C	Non Clone- Clone	h4b3	8.862	428.41	82.568	1695.309	14.321
Ctrl MO N-C	Non Clone- Clone	h4b3	8.862	313.908	23.349	1332.624	14.321
Ctrl MO N-C	Non Clone- Clone	h4b3	8.862	234.253	29.056	871.46	14.321
Ctrl MO N-C	Non Clone- Clone	h4b3	8.862	217.726	25.06	976.493	14.321
Ctrl MO N-C	Non Clone- Clone
Ctrl MO N-C	Non Clone- Clone	h4b4	13.346	861.638	102.514	3344.554	21.613
Ctrl MO N-C	Non Clone- Clone	h4b4	13.346	833.845	161.195	2820.625	21.613
Ctrl MO N-C	Non Clone- Clone	h4b4	13.346	748.503	87.52	2291.553	21.613
Ctrl MO N-C	Non Clone- Clone	h4b4	13.346	561.341	72.869	2012.926	21.613
Ctrl MO N-C	Non Clone- Clone	h4b4	13.346	366.326	65.85	1299.023	21.613
Ctrl MO N-C	Non Clone- Clone
Ctrl MO N-C	Non Clone- Clone	h4b5	10.915	576.393	78.57	4048.269	17.66
Ctrl MO N-C	Non Clone- Clone	h4b5	10.915	546.163	72.52	3724.03	17.66
Ctrl MO N-C	Non Clone- Clone	h4b5	10.915	470.79	59.639	2471.628	17.66
Ctrl MO N-C	Non Clone- Clone	h4b5	10.915	384.499	42.647	2115.926	17.66
Ctrl MO N-C	Non Clone- Clone	h4b5	10.915	313.365	14.356	2919.23	17.66
Ctrl MO N-C	Non Clone- Clone	h4b5	10.915	274.823	12.471	2149.104	17.66
Ctrl MO N-C	Non Clone- Clone
Ctrl MO N-C	Non Clone- Clone	h4b6	11.671	647.886	76.718	3342.278	18.89
Ctrl MO N-C	Non Clone- Clone	h4b6	11.671	671.111	117.698	3476.02	18.89
Ctrl MO N-C	Non Clone- Clone	h4b6	11.671	656.406	93.309	2779.486	18.89
Ctrl MO N-C	Non Clone- Clone	h4b6	11.671	653.7	59.211	2906.189	18.89
Ctrl MO N-C	Non Clone- Clone	h4b6	11.671	626.873	74.972	2707.22	18.89
Ctrl MO N-C	Non Clone- Clone	h4b6	11.671	595.861	43.648	2718.789	18.89
Ctrl MO N-C	Non Clone- Clone	h4b6	11.671	565.31	27.367	3132.768	18.89
Ctrl MO N-C	Non Clone- Clone	h4b6	11.671	535.593	21.209	2756.109	18.89
Ctrl MO N-C	Non Clone- Clone
Ctrl MO N-C	Non Clone- Clone	h4b7	9.402	392.937	51.594	2225.089	15.2
Ctrl MO N-C	Non Clone- Clone	h4b7	9.402	312.712	41.108	1318.117	15.2
Ctrl MO N-C	Non Clone- Clone	h4b7	9.402	264.151	27.248	1010.275	15.2
Ctrl MO N-C	Non Clone- Clone	h4b7	9.402	247.352	38.738	1202.642	15.2
Ctrl MO N-C	Non Clone- Clone
Ctrl MO N-C	Non Clone- Clone	h4b8	7.781	498.335	131.775	2006.502	12.564
Ctrl MO N-C	Non Clone- Clone	h4b8	7.781	404.47	96.831	1413.593	12.564
Ctrl MO N-C	Non Clone- Clone	h4b8	7.781	518.261	67.372	4061.755	12.564
Ctrl MO N-C	Non Clone- Clone	h4b8	7.781	562.26	40.041	4095	12.564
Ctrl MO N-C	Non Clone- Clone	h4b8	7.781	615.245	39.75	4095	12.564
Ctrl MO N-C	Non Clone- Clone
Ctrl MO N-C	Non Clone- Clone	h4b9	12.266	456.189	82.615	2057.859	19.856
Ctrl MO N-C	Non Clone- Clone	h4b9	12.266	467.145	79.258	2749.4	19.856
Ctrl MO N-C	Non Clone- Clone	h4b9	12.266	501.265	109.01	2120.537	19.856
Ctrl MO N-C	Non Clone- Clone	h4b9	12.266	511.044	87.094	2963.321	19.856
Ctrl MO N-C	Non Clone- Clone	h4b9	12.266	515.504	93.107	2483.413	19.856
Ctrl MO N-C	Non Clone- Clone	h4b9	12.266	486.57	95.212	2946.705	19.856
Ctrl MO N-C	Non Clone- Clone	h5b1	10.645	994.591	174.479	3479.846	17.22
Ctrl MO N-C	Non Clone- Clone	h5b1	10.645	974.159	110.955	3246.15	17.22
Ctrl MO N-C	Non Clone- Clone	h5b1	10.645	703.286	31.759	2505.926	17.22
Ctrl MO N-C	Non Clone- Clone	h5b1	10.645	384.398	7.891	1619.324	17.22
Ctrl MO N-C	Non Clone- Clone	h5b1	10.645	272.434	5.054	1114.006	17.22
Ctrl MO N-C	Non Clone- Clone	h5b1	10.645	191.813	13.039	800.613	17.22
Ctrl MO N-C	Non Clone- Clone
Ctrl MO N-C	Non Clone- Clone	h5b2	9.78	917.52	147.675	2979.551	15.814
Ctrl MO N-C	Non Clone- Clone	h5b2	9.78	858.607	129.137	3740.763	15.814
Ctrl MO N-C	Non Clone- Clone	h5b2	9.78	621.551	93.543	2282.923	15.814
Ctrl MO N-C	Non Clone- Clone	h5b2	9.78	392.408	43.072	1617.382	15.814
Ctrl MO N-C	Non Clone- Clone	h5b2	9.78	323.047	34.514	1938.918	15.814
Ctrl MO N-C	Non Clone- Clone	h5b2	9.78	269.471	24.891	1927.694	15.814
Ctrl MO N-C	Non Clone- Clone
Ctrl MO N-C	Non Clone- Clone	h5b3	5.511	438.095	41.922	1967.282	8.874
Ctrl MO N-C	Non Clone- Clone	h5b3	5.511	340.389	38.868	1534.225	8.874
Ctrl MO N-C	Non Clone- Clone	h5b3	5.511	211.906	23.287	627.772	8.874
Ctrl MO N-C	Non Clone- Clone	h5b3	5.511	129.935	15.285	447.258	8.874
Ctrl MO N-C	Non Clone- Clone	h5b3	5.511	106.972	3.982	536.453	8.874
Ctrl MO N-C	Non Clone- Clone
Ctrl MO N-C	Non Clone- Clone	h5b4	9.024	366.99	61.945	1365.082	14.583
Ctrl MO N-C	Non Clone- Clone	h5b4	9.024	318.022	51.08	1507.616	14.583
Ctrl MO N-C	Non Clone- Clone	h5b4	9.024	252.615	34.555	1494.812	14.583
Ctrl MO N-C	Non Clone- Clone	h5b4	9.024	224.528	30.507	1191.516	14.583
Ctrl MO N-C	Non Clone- Clone	h5b4	9.024	189.536	5.775	819.792	14.583
Ctrl MO N-C	Non Clone- Clone	h5b4	9.024	155.419	31.423	467.358	14.583
Ctrl MO N-C	Non Clone- Clone	h5b4	9.024	158.443	11.124	891.786	14.583
Ctrl MO N-C	Non Clone- Clone
Ctrl MO N-C	Non Clone- Clone	h5b5	7.727	582.394	153.212	1784.304	12.476
Ctrl MO N-C	Non Clone- Clone	h5b5	7.727	441.48	109.355	1521.533	12.476
Ctrl MO N-C	Non Clone- Clone	h5b5	7.727	330.112	41.923	1099.734	12.476
Ctrl MO N-C	Non Clone- Clone	h5b5	7.727	261.358	36.095	725.033	12.476
Ctrl MO N-C	Non Clone- Clone
Ctrl MO N-C	Non Clone- Clone	h5b6	6.214	833.165	162.193	3568.674	10.012
Ctrl MO N-C	Non Clone- Clone	h5b6	6.214	576.003	148.703	1984.138	10.012
Ctrl MO N-C	Non Clone- Clone	h5b6	6.214	314.442	91.509	1002.482	10.012
Ctrl MO N-C	Non Clone- Clone	h5b6	6.214	210.239	34.635	678.886	10.012
Ctrl MO N-C	Non Clone- Clone
Ctrl MO N-C	Non Clone- Clone	h5b7	5.728	678.89	140.236	2061.674	9.225
Ctrl MO N-C	Non Clone- Clone	h5b7	5.728	524.851	76.777	1611.808	9.225
Ctrl MO N-C	Non Clone- Clone	h5b7	5.728	373.798	47.427	1442.773	9.225
Ctrl MO N-C	Non Clone- Clone	h5b7	5.728	242.827	23.03	904.527	9.225
Ctrl MO N-C	Non Clone- Clone	h5b7	5.728	182.56	8.498	1270.729	9.225
Ctrl MO N-C	Non Clone- Clone
Ctrl MO N-C	Non Clone- Clone	h5b8	6.592	1072.856	259.205	3942.604	10.631
Ctrl MO N-C	Non Clone- Clone	h5b8	6.592	774.326	211.569	2427.568	10.631
Ctrl MO N-C	Non Clone- Clone	h5b8	6.592	612.251	184.994	1920.612	10.631
Ctrl MO N-C	Non Clone- Clone	h5b8	6.592	465.32	110.836	1409.206	10.631
Ctrl MO N-C	Non Clone- Clone	h5b8	6.592	374.253	63.537	1220.181	10.631
Ctrl MO N-C	Non Clone- Clone	h5b8	6.592	311.486	51.849	1288.979	10.631
Ctrl MO N-C	Non Clone- Clone
Ctrl MO N-C	Non Clone- Clone	h5b9	5.89	866.664	226.959	2747.064	9.489
Ctrl MO N-C	Non Clone- Clone	h5b9	5.89	993.984	130.395	3310.082	9.489
Ctrl MO N-C	Non Clone- Clone	h5b9	5.89	959.595	118.154	3810.83	9.489
Ctrl MO N-C	Non Clone- Clone	h5b9	5.89	795.242	86.856	3326.638	9.489
Ctrl MO N-C	Non Clone- Clone	h5b9	5.89	527.696	82.033	2008.283	9.489
Ctrl MO N-C	Non Clone- Clone	h5b9	5.89	303.137	70.938	1658.955	9.489
Ctrl MO N-C	Non Clone- Clone
Ctrl MO N-C	Non Clone- Clone	h5b10	10.321	1093.679	216.843	3629.876	16.693
Ctrl MO N-C	Non Clone- Clone	h5b10	10.321	975.555	153.671	3876.62	16.693
Ctrl MO N-C	Non Clone- Clone	h5b10	10.321	690.193	75.089	2992.743	16.693
Ctrl MO N-C	Non Clone- Clone	h5b10	10.321	532.821	69.612	3369.421	16.693
Ctrl MO N-C	Non Clone- Clone	h5b10	10.321	363.53	46.944	3233.783	16.693
Ctrl MO N-C	Non Clone- Clone	h5b10	10.321	234.424	23.956	1933.125	16.693
Ctrl MO N-C	Non Clone- Clone
Ctrl MO N-C	Non Clone- Clone	h5b11	6.754	821.68	132.274	2933.078	10.894
Ctrl MO N-C	Non Clone- Clone	h5b11	6.754	721.081	90.062	3056.907	10.894
Ctrl MO N-C	Non Clone- Clone	h5b11	6.754	502.735	24.197	1738.976	10.894
Ctrl MO N-C	Non Clone- Clone	h5b11	6.754	411.147	23.963	1468.463	10.894
Ctrl MO N-C	Non Clone- Clone	h5b11	6.754	333.782	6.82	1434.98	10.894
Ctrl MO N-C	Non Clone- Clone
Ctrl MO N-C	Non Clone- Clone	h5b12	10.699	619.287	133.589	2267.897	17.307
Ctrl MO N-C	Non Clone- Clone	h5b12	10.699	478.574	50.731	2202.205	17.307
Ctrl MO N-C	Non Clone- Clone	h5b12	10.699	430.947	40.185	2011.08	17.307
Ctrl MO N-C	Non Clone- Clone	h5b12	10.699	410.401	31.129	2924.518	17.307
Ctrl MO N-C	Non Clone- Clone	h5b12	10.699	359.228	12.698	1956.526	17.307
Ctrl MO N-C	Non Clone- Clone
Ctrl MO N-C	Non Clone- Clone	h5b13	7.457	499.226	81.056	2092.081	12.037
Ctrl MO N-C	Non Clone- Clone	h5b13	7.457	309.48	80.038	1137.377	12.037
Ctrl MO N-C	Non Clone- Clone	h5b13	7.457	191.289	30.357	1557.443	12.037
Ctrl MO N-C	Non Clone- Clone	h5b13	7.457	151.416	2.52	1043.296	12.037
Ctrl MO N-C	Non Clone- Clone	h5b13	7.457	116.199	9.8	368.318	12.037
Ctrl MO N-C	Non Clone- Clone
Ctrl MO N-C	Non Clone- Clone	h5b14	6.052	627.884	0	3187.11	9.751
Ctrl MO N-C	Non Clone- Clone	h5b14	6.052	617.912	0	2816.726	9.751
Ctrl MO N-C	Non Clone- Clone	h5b14	6.052	388.678	0	1308.885	9.751
Ctrl MO N-C	Non Clone- Clone	h5b14	6.052	203.6	0	638.81	9.751
Ctrl MO N-C	Non Clone- Clone	h5b14	6.052	155.08	0	532.28	9.751
Ctrl MO N-C	Non Clone- Clone
Ctrl MO N-C	Non Clone- Clone	h5b15	9.294	488.093	52.667	3298.29	15.024
Ctrl MO N-C	Non Clone- Clone	h5b15	9.294	470.299	68.518	3351.887	15.024
Ctrl MO N-C	Non Clone- Clone	h5b15	9.294	423.122	48.925	2267.22	15.024
Ctrl MO N-C	Non Clone- Clone	h5b15	9.294	342.116	20.692	1690.826	15.024
Ctrl MO N-C	Non Clone- Clone	h5b15	9.294	191.429	18.849	1186.493	15.024
Ctrl MO N-C	Non Clone- Clone
Ctrl MO N-C	Non Clone- Clone	h5b16	4.917	701.701	158.608	1980.815	7.906
Ctrl MO N-C	Non Clone- Clone	h5b16	4.917	464.498	60.097	1925.857	7.906
Ctrl MO N-C	Non Clone- Clone	h5b16	4.917	370.148	70.857	1478.223	7.906
Ctrl MO N-C	Non Clone- Clone	h5b16	4.917	306.507	57.621	1020.805	7.906
Ctrl MO N-C	Non Clone- Clone	h5b16	4.917	240.176	41.751	716.579	7.906
Ctrl MO N-C	Non Clone- Clone	h5b16	4.917	140.268	1.883	521.174	7.906
Ctrl MO N-C	Non Clone- Clone
Ctrl MO N-C	Non Clone- Clone	h5b17	9.402	458.165	26.945	2558.799	15.2
Ctrl MO N-C	Non Clone- Clone	h5b17	9.402	399.169	17.912	2905.4	15.2
Ctrl MO N-C	Non Clone- Clone	h5b17	9.402	256.398	7.573	1898.016	15.2
Ctrl MO N-C	Non Clone- Clone	h5b17	9.402	175.076	10.952	874.887	15.2
Ctrl MO N-C	Non Clone- Clone	h5b17	9.402	119.918	4.652	401.702	15.2
Ctrl MO N-C	Non Clone- Clone
Ctrl MO N-C	Non Clone- Clone	h5b18	10.753	598.21	80.753	2373.927	17.396
Ctrl MO N-C	Non Clone- Clone	h5b18	10.753	388.682	49.381	1482.173	17.396
Ctrl MO N-C	Non Clone- Clone	h5b18	10.753	206.416	16.449	753.27	17.396
Ctrl MO N-C	Non Clone- Clone	h5b18	10.753	126.637	7.106	725.531	17.396
Ctrl MO N-C	Non Clone- Clone	h5b18	10.753	96.775	3.636	505.988	17.396
Ctrl MO N-C	Non Clone- Clone
Ctrl MO N-C	Non Clone- Clone	h5b19	10.483	785.874	151.046	3855.392	16.956
Ctrl MO N-C	Non Clone- Clone	h5b19	10.483	647.188	111.725	2882.471	16.956
Ctrl MO N-C	Non Clone- Clone	h5b19	10.483	416.849	61.817	1116.281	16.956
Ctrl MO N-C	Non Clone- Clone	h5b19	10.483	368.861	46.942	1313.458	16.956
Ctrl MO N-C	Non Clone- Clone	h5b19	10.483	350.09	47.064	1463.409	16.956
Ctrl MO N-C	Non Clone- Clone	h5b19	10.483	325.759	10.563	1435.544	16.956
Ctrl MO N-C	Non Clone- Clone
Ctrl MO N-C	Non Clone- Clone	h5b20	5.025	661.641	210.5	2229.735	8.073
Ctrl MO N-C	Non Clone- Clone	h5b20	5.025	515.116	39.833	1794.402	8.073
Ctrl MO N-C	Non Clone- Clone	h5b20	5.025	470.008	75.55	1988.8	8.073
Ctrl MO N-C	Non Clone- Clone	h5b20	5.025	407.08	110.264	1267.98	8.073
Ctrl MO N-C	Non Clone- Clone	h5b20	5.025	299.018	77.225	828.118	8.073
Ctrl MO N-C	Non Clone- Clone	h5b20	5.025	168.676	36.904	456.347	8.073
Ctrl MO N-C	Non Clone- Clone
Ctrl MO N-C	Non Clone- Clone	h5b21	9.186	682.548	126.3	2226.405	14.848
Ctrl MO N-C	Non Clone- Clone	h5b21	9.186	487.786	62.031	2216.059	14.848
Ctrl MO N-C	Non Clone- Clone	h5b21	9.186	390.5	46.013	1472.359	14.848
Ctrl MO N-C	Non Clone- Clone	h5b21	9.186	334.911	58.509	2180.025	14.848
Ctrl MO N-C	Non Clone- Clone	h5b21	9.186	298.755	42.656	2095.764	14.848
Ctrl MO N-C	Non Clone- Clone	h5b21	9.186	247.471	22.201	1514.873	14.848
Ctrl MO N-C	Non Clone- Clone	h5b21	9.186	204.86	9.299	1417.216	14.848
Ctrl MO N-C	Non Clone- Clone	h6b1	11.131	400.379	27.795	1486.022	18.011
Ctrl MO N-C	Non Clone- Clone	h6b1	11.131	452.873	40.967	3083.813	18.011
Ctrl MO N-C	Non Clone- Clone	h6b1	11.131	390.709	39.841	1985.714	18.011
Ctrl MO N-C	Non Clone- Clone	h6b1	11.131	275.302	36.298	1289.134	18.011
Ctrl MO N-C	Non Clone- Clone	h6b1	11.131	218.365	14.008	1195.89	18.011
Ctrl MO N-C	Non Clone- Clone
Ctrl MO N-C	Non Clone- Clone	h6b2	5.133	573.779	26.171	2795.953	8.259
Ctrl MO N-C	Non Clone- Clone	h6b2	5.133	442.222	47.088	1405.878	8.259
Ctrl MO N-C	Non Clone- Clone	h6b2	5.133	282.33	43.496	1322.511	8.259
Ctrl MO N-C	Non Clone- Clone	h6b2	5.133	253.706	20.511	1642.45	8.259
Ctrl MO N-C	Non Clone- Clone	h6b2	5.133	228.152	11.649	1329.763	8.259
Ctrl MO N-C	Non Clone- Clone
Ctrl MO N-C	Non Clone- Clone	h6b3	7.889	366.416	15.351	1537.418	12.74
Ctrl MO N-C	Non Clone- Clone	h6b3	7.889	292.205	3.636	1208.924	12.74
Ctrl MO N-C	Non Clone- Clone	h6b3	7.889	212.765	1.969	1445.408	12.74
Ctrl MO N-C	Non Clone- Clone	h6b3	7.889	136.169	3.013	483.75	12.74
Ctrl MO N-C	Non Clone- Clone
Ctrl MO N-C	Non Clone- Clone	h6b4	5.349	457.563	76.426	1912.01	8.61
Ctrl MO N-C	Non Clone- Clone	h6b4	5.349	432.748	53.285	1536.487	8.61
Ctrl MO N-C	Non Clone- Clone	h6b4	5.349	376.862	66.701	1117.002	8.61
Ctrl MO N-C	Non Clone- Clone	h6b4	5.349	287.428	34.483	1174.584	8.61
Ctrl MO N-C	Non Clone- Clone	h6b4	5.349	192.977	19.015	782.421	8.61
Ctrl MO N-C	Non Clone- Clone
Ctrl MO N-C	Non Clone- Clone	h6b5	4.917	749.541	145.404	2463.282	7.907
Ctrl MO N-C	Non Clone- Clone	h6b5	4.917	580.113	146.259	2087.33	7.907
Ctrl MO N-C	Non Clone- Clone	h6b5	4.917	416.249	99.427	1853.849	7.907
Ctrl MO N-C	Non Clone- Clone	h6b5	4.917	332.98	74.282	1037.95	7.907
Ctrl MO N-C	Non Clone- Clone	h6b5	4.917	251.136	18.456	682.492	7.907
Ctrl MO N-C	Non Clone- Clone
Ctrl MO N-C	Non Clone- Clone	h6b6	9.51	572.581	23.695	2275.273	15.375
Ctrl MO N-C	Non Clone- Clone	h6b6	9.51	476.923	37.155	1940.547	15.375
Ctrl MO N-C	Non Clone- Clone	h6b6	9.51	311.291	30.361	1369.327	15.375
Ctrl MO N-C	Non Clone- Clone	h6b6	9.51	213.115	6.408	1197.235	15.375
Ctrl MO N-C	Non Clone- Clone	h6b6	9.51	183.524	3.962	939.391	15.375
Ctrl MO N-C	Non Clone- Clone
Ctrl MO N-C	Non Clone- Clone	h6b7	5.566	442.227	74.894	1476.288	8.961
Ctrl MO N-C	Non Clone- Clone	h6b7	5.566	328.558	31.984	801.303	8.961
Ctrl MO N-C	Non Clone- Clone	h6b7	5.566	220.464	26.148	611.657	8.961
Ctrl MO N-C	Non Clone- Clone	h6b7	5.566	155.598	24.196	780.469	8.961
Ctrl MO N-C	Non Clone- Clone	h6b7	5.566	122.548	11.222	642.723	8.961
Ctrl MO N-C	Non Clone- Clone	h6b7	5.566	105.033	3.518	417.983	8.961
Ctrl MO N-C	Non Clone- Clone	h6b7	5.566	84.002	1.972	398.812	8.961
Ctrl MO N-C	Non Clone- Clone
Ctrl MO N-C	Non Clone- Clone	h6b8	9.348	551.45	82.692	2479.702	15.112
Ctrl MO N-C	Non Clone- Clone	h6b8	9.348	482.464	75.97	3482.903	15.112
Ctrl MO N-C	Non Clone- Clone	h6b8	9.348	384.252	21.565	2986.743	15.112
Ctrl MO N-C	Non Clone- Clone	h6b8	9.348	292.886	26.632	1895.54	15.112
Ctrl MO N-C	Non Clone- Clone	h6b8	9.348	195.722	13.317	890.209	15.112
Ctrl MO N-C	Non Clone- Clone	h6b8	9.348	124.745	0.121	754.681	15.112
Ctrl MO N-C	Non Clone- Clone
Ctrl MO N-C	Non Clone- Clone	h6b9	9.132	536.597	113.865	2538.45	14.76
Ctrl MO N-C	Non Clone- Clone	h6b9	9.132	500.951	89.437	1815.62	14.76
Ctrl MO N-C	Non Clone- Clone	h6b9	9.132	405.254	57.722	1720.827	14.76
Ctrl MO N-C	Non Clone- Clone	h6b9	9.132	236.405	13.646	801.867	14.76
Ctrl MO N-C	Non Clone- Clone	h6b9	9.132	152.825	19.295	830.215	14.76
Ctrl MO N-C	Non Clone- Clone	h6b9	9.132	124.612	2.884	664.303	14.76
Ctrl MO N-C	Non Clone- Clone
Ctrl MO N-C	Non Clone- Clone	h6b10	8.754	454.443	45.982	2512.552	14.145
Ctrl MO N-C	Non Clone- Clone	h6b10	8.754	444.441	55.409	2699.468	14.145
Ctrl MO N-C	Non Clone- Clone	h6b10	8.754	374.017	65.534	1776.418	14.145
Ctrl MO N-C	Non Clone- Clone	h6b10	8.754	257.506	29.549	1318.726	14.145
Ctrl MO N-C	Non Clone- Clone	h6b10	8.754	196.795	18.515	623.091	14.145
Ctrl MO N-C	Non Clone- Clone	h6b10	8.754	149.067	12.113	899.233	14.145
Ctrl MO N-C	Non Clone- Clone
Ctrl MO N-C	Non Clone- Clone	h6b11	4.161	502.057	97.762	2655.396	6.676
Ctrl MO N-C	Non Clone- Clone	h6b11	4.161	462.546	63.297	3133.597	6.676
Ctrl MO N-C	Non Clone- Clone	h6b11	4.161	377.917	39.477	1784.028	6.676
Ctrl MO N-C	Non Clone- Clone	h6b11	4.161	296.623	34.418	2056.871	6.676
Ctrl MO N-C	Non Clone- Clone	h6b11	4.161	220.233	11.629	1845.179	6.676
Ctrl MO N-C	Non Clone- Clone	h7b1	7.457	581.501	80.262	3380.706	12.037
Ctrl MO N-C	Non Clone- Clone	h7b1	7.457	465.902	84.697	1825.495	12.037
Ctrl MO N-C	Non Clone- Clone	h7b1	7.457	353.573	45.904	1793.557	12.037
Ctrl MO N-C	Non Clone- Clone	h7b1	7.457	385.093	43.724	1434.745	12.037
Ctrl MO N-C	Non Clone- Clone	h7b1	7.457	439.266	75.113	2624.005	12.037
Ctrl MO N-C	Non Clone- Clone
Ctrl MO N-C	Non Clone- Clone	h7b2	7.727	749.072	119.712	2833.175	12.476
Ctrl MO N-C	Non Clone- Clone	h7b2	7.727	617.556	88.757	3083.979	12.476
Ctrl MO N-C	Non Clone- Clone	h7b2	7.727	458.371	30.746	1559.459	12.476
Ctrl MO N-C	Non Clone- Clone	h7b2	7.727	278.729	31.086	1838.07	12.476
Ctrl MO N-C	Non Clone- Clone	h7b2	7.727	217.151	39.858	1308.754	12.476
Ctrl MO N-C	Non Clone- Clone
Ctrl MO N-C	Non Clone- Clone	h7b3	7.673	339.264	39.587	2364.907	12.388
Ctrl MO N-C	Non Clone- Clone	h7b3	7.673	164.38	2.615	631.934	12.388
Ctrl MO N-C	Non Clone- Clone	h7b3	7.673	132.096	9.005	607.619	12.388
Ctrl MO N-C	Non Clone- Clone	h7b3	7.673	119.628	5.661	740.16	12.388
Ctrl MO N-C	Non Clone- Clone
Ctrl MO N-C	Non Clone- Clone	h7b4	8.97	761.364	132.744	3607.029	14.497
Ctrl MO N-C	Non Clone- Clone	h7b4	8.97	708.825	113.377	4095	14.497
Ctrl MO N-C	Non Clone- Clone	h7b4	8.97	543.042	125.312	3751.363	14.497
Ctrl MO N-C	Non Clone- Clone	h7b4	8.97	340.47	67.548	1481.859	14.497
Ctrl MO N-C	Non Clone- Clone	h7b4	8.97	294.821	59.819	997.687	14.497
Ctrl MO N-C	Non Clone- Clone
Ctrl MO N-C	Non Clone- Clone	h7b5	6.16	502.036	82.061	2566.805	9.927
Ctrl MO N-C	Non Clone- Clone	h7b5	6.16	489.135	73.985	4088.429	9.927
Ctrl MO N-C	Non Clone- Clone	h7b5	6.16	420.282	56.648	3147.414	9.927
Ctrl MO N-C	Non Clone- Clone	h7b5	6.16	349.418	57.005	1461.209	9.927
Ctrl MO N-C	Non Clone- Clone	h7b5	6.16	308.817	50.686	1200.215	9.927
Ctrl MO N-C	Non Clone- Clone
Ctrl MO N-C	Non Clone- Clone	h7b6	9.564	851.757	148.015	4095	15.463
Ctrl MO N-C	Non Clone- Clone	h7b6	9.564	839.432	134.945	4095	15.463
Ctrl MO N-C	Non Clone- Clone	h7b6	9.564	708.89	139.346	4022.495	15.463
Ctrl MO N-C	Non Clone- Clone	h7b6	9.564	491.417	137.746	3597.208	15.463
Ctrl MO N-C	Non Clone- Clone	h7b6	9.564	478.38	104.857	3177.915	15.463
Ctrl MO N-C	Non Clone- Clone
Ctrl MO N-C	Non Clone- Clone	h7b7	6.862	661.298	46.735	3996.073	11.07
Ctrl MO N-C	Non Clone- Clone	h7b7	6.862	557.995	82.823	3474.96	11.07
Ctrl MO N-C	Non Clone- Clone	h7b7	6.862	504.923	68.391	3657.755	11.07
Ctrl MO N-C	Non Clone- Clone	h7b7	6.862	477.561	70.037	2698.864	11.07
Ctrl MO N-C	Non Clone- Clone	h7b7	6.862	426.828	60.13	1969.584	11.07
Ctrl MO N-C	Non Clone- Clone
Ctrl MO N-C	Non Clone- Clone	h7b8	4.593	516.744	112.397	2031.036	7.38
Ctrl MO N-C	Non Clone- Clone	h7b8	4.593	329.02	64.42	777.37	7.38
Ctrl MO N-C	Non Clone- Clone	h7b8	4.593	283.519	53.246	967.538	7.38
Ctrl MO N-C	Non Clone- Clone	h7b8	4.593	266.572	10.767	1188.986	7.38
Ctrl MO N-C	Non Clone- Clone
Ctrl MO N-C	Non Clone- Clone	h7b9	9.348	514.106	52.867	1845.104	15.108
Ctrl MO N-C	Non Clone- Clone	h7b9	9.348	429.445	50.157	2120.494	15.108
Ctrl MO N-C	Non Clone- Clone	h7b9	9.348	339.474	25.936	1614.383	15.108
Ctrl MO N-C	Non Clone- Clone	h7b9	9.348	258.458	17.572	1120.314	15.108
Ctrl MO N-C	Non Clone- Clone	h7b9	9.348	197.909	14.702	582.272	15.108
Ctrl MO N-C	Non Clone- Clone	h7b9	9.348	218.388	26.046	807.062	15.108
Ctrl MO N-N	Non Clone- Non Clone	h1b1	7.403	714.952	110.713	2737.577	11.949
Ctrl MO N-N	Non Clone- Non Clone	h1b1	7.403	559.732	59.165	2437.513	11.949
Ctrl MO N-N	Non Clone- Non Clone	h1b1	7.403	366.841	32.094	2996.299	11.949
Ctrl MO N-N	Non Clone- Non Clone	h1b1	7.403	243.46	22.912	1740.654	11.949
Ctrl MO N-N	Non Clone- Non Clone	h1b1	7.403	194.428	25.961	1176.122	11.949
Ctrl MO N-N	Non Clone- Non Clone
Ctrl MO N-N	Non Clone- Non Clone	h1b2	12.644	552.473	92.306	1974.967	20.471
Ctrl MO N-N	Non Clone- Non Clone	h1b2	12.644	412.468	71.759	1394.134	20.471
Ctrl MO N-N	Non Clone- Non Clone	h1b2	12.644	290.066	28.827	1493.617	20.471
Ctrl MO N-N	Non Clone- Non Clone	h1b2	12.644	233.575	24.19	1142.701	20.471
Ctrl MO N-N	Non Clone- Non Clone	h1b2	12.644	179.52	8.534	684.531	20.471
Ctrl MO N-N	Non Clone- Non Clone
Ctrl MO N-N	Non Clone- Non Clone	h1b3	10.861	898.335	149.972	2741.948	17.572
Ctrl MO N-N	Non Clone- Non Clone	h1b3	10.861	633.973	100.642	1953.001	17.572
Ctrl MO N-N	Non Clone- Non Clone	h1b3	10.861	530.952	100.66	1886.301	17.572
Ctrl MO N-N	Non Clone- Non Clone	h1b3	10.861	430.72	70.301	2000.414	17.572
Ctrl MO N-N	Non Clone- Non Clone	h1b3	10.861	322.184	35.808	1698.188	17.572
Ctrl MO N-N	Non Clone- Non Clone	h1b3	10.861	235.437	16.519	1120.931	17.572
Ctrl MO N-N	Non Clone- Non Clone
Ctrl MO N-N	Non Clone- Non Clone	h1b4	11.563	688.247	112.701	2752.323	18.714
Ctrl MO N-N	Non Clone- Non Clone	h1b4	11.563	611.382	106.954	2328.519	18.714
Ctrl MO N-N	Non Clone- Non Clone	h1b4	11.563	461.482	79.773	2159.153	18.714
Ctrl MO N-N	Non Clone- Non Clone	h1b4	11.563	284.532	8.304	1300.623	18.714
Ctrl MO N-N	Non Clone- Non Clone	h1b4	11.563	201.488	9.497	996.299	18.714
Ctrl MO N-N	Non Clone- Non Clone	h1b4	11.563	173.061	7.156	849.721	18.714
Ctrl MO N-N	Non Clone- Non Clone
Ctrl MO N-N	Non Clone- Non Clone	h1b5	8.808	512.417	43.552	2482.184	14.233
Ctrl MO N-N	Non Clone- Non Clone	h1b5	8.808	370.518	31.639	1306.149	14.233
Ctrl MO N-N	Non Clone- Non Clone	h1b5	8.808	296.37	20.884	1008.71	14.233
Ctrl MO N-N	Non Clone- Non Clone	h1b5	10.591	584.51	61.591	4093.474	17.132
Ctrl MO N-N	Non Clone- Non Clone	h1b5	10.591	593.998	19.218	3946.558	17.132
Ctrl MO N-N	Non Clone- Non Clone	h1b5	10.591	630.306	17.532	3974.732	17.132
Ctrl MO N-N	Non Clone- Non Clone	h1b5	10.591	619.363	11.85	3137.207	17.132
Ctrl MO N-N	Non Clone- Non Clone
Ctrl MO N-N	Non Clone- Non Clone	h1b6	8.429	882.573	162.811	3274.881	13.618
Ctrl MO N-N	Non Clone- Non Clone	h1b6	8.429	711.108	145.418	2299.839	13.618
Ctrl MO N-N	Non Clone- Non Clone	h1b6	8.429	594.082	110.015	2114.886	13.618
Ctrl MO N-N	Non Clone- Non Clone	h1b6	8.429	523.644	78.849	2045.558	13.618
Ctrl MO N-N	Non Clone- Non Clone	h1b6	8.429	398.896	47.697	1807.234	13.618
Ctrl MO N-N	Non Clone- Non Clone	h1b6	8.429	269.057	30.125	1118.023	13.618
Ctrl MO N-N	Non Clone- Non Clone
Ctrl MO N-N	Non Clone- Non Clone	h1b7	12.104	717.885	80.686	4095	19.593
Ctrl MO N-N	Non Clone- Non Clone	h1b7	12.104	556.877	96.734	3809.257	19.593
Ctrl MO N-N	Non Clone- Non Clone	h1b7	12.104	365.222	43.026	1691.604	19.593
Ctrl MO N-N	Non Clone- Non Clone	h1b7	12.104	291.658	34.559	1484.704	19.593
Ctrl MO N-N	Non Clone- Non Clone
Ctrl MO N-N	Non Clone- Non Clone	h1b8	6.43	649.976	83.411	3258.718	10.367
Ctrl MO N-N	Non Clone- Non Clone	h1b8	6.43	658.644	130.311	1928.566	10.367
Ctrl MO N-N	Non Clone- Non Clone	h1b8	6.43	533.466	159.851	1644.923	10.367
Ctrl MO N-N	Non Clone- Non Clone	h1b8	6.43	363.393	78.251	1121.157	10.367
Ctrl MO N-N	Non Clone- Non Clone	h1b8	6.43	225.02	67.027	645.177	10.367
Ctrl MO N-N	Non Clone- Non Clone
Ctrl MO N-N	Non Clone- Non Clone	h1b9	11.077	581.529	114.251	2809.8	17.923
Ctrl MO N-N	Non Clone- Non Clone	h1b9	11.077	422.735	63.649	1391.85	17.923
Ctrl MO N-N	Non Clone- Non Clone	h1b9	11.077	342.116	43.359	1963.323	17.923
Ctrl MO N-N	Non Clone- Non Clone	h1b9	11.077	284.602	26.014	1925.642	17.923
Ctrl MO N-N	Non Clone- Non Clone	h1b9	11.077	207.787	19.922	1254.351	17.923
Ctrl MO N-N	Non Clone- Non Clone
Ctrl MO N-N	Non Clone- Non Clone	h1b10	8.916	624.605	139.156	2733.044	14.409
Ctrl MO N-N	Non Clone- Non Clone	h1b10	8.916	435.107	97.844	1662.654	14.409
Ctrl MO N-N	Non Clone- Non Clone	h1b10	8.916	390.52	120.57	1456.08	14.409
Ctrl MO N-N	Non Clone- Non Clone	h1b10	8.916	395.114	90.973	1607.001	14.409
Ctrl MO N-N	Non Clone- Non Clone	h1b10	8.916	401.289	73.384	1484.405	14.409
Ctrl MO N-N	Non Clone- Non Clone
Ctrl MO N-N	Non Clone- Non Clone	h1b11	10.861	623.657	74.12	3277.344	17.572
Ctrl MO N-N	Non Clone- Non Clone	h1b11	10.861	502.978	65.464	2608.599	17.572
Ctrl MO N-N	Non Clone- Non Clone	h1b11	10.861	390.105	74.74	1738.604	17.572
Ctrl MO N-N	Non Clone- Non Clone	h1b11	10.861	315.737	45.396	1243.914	17.572
Ctrl MO N-N	Non Clone- Non Clone	h1b11	10.861	276.721	39.294	1458.083	17.572
Ctrl MO N-N	Non Clone- Non Clone	h2b1	10.807	543.033	115.302	1651.365	17.484
Ctrl MO N-N	Non Clone- Non Clone	h2b1	10.807	496.899	78.437	1714.987	17.484
Ctrl MO N-N	Non Clone- Non Clone	h2b1	10.807	407.747	58.883	2985.258	17.484
Ctrl MO N-N	Non Clone- Non Clone	h2b1	10.807	342.976	64.52	2121.861	17.484
Ctrl MO N-N	Non Clone- Non Clone
Ctrl MO N-N	Non Clone- Non Clone	h2b2	5.566	668.475	111.197	2334.858	8.962
Ctrl MO N-N	Non Clone- Non Clone	h2b2	5.566	631.373	113.991	2189.423	8.962
Ctrl MO N-N	Non Clone- Non Clone	h2b2	5.566	558.668	77.665	1684.697	8.962
Ctrl MO N-N	Non Clone- Non Clone	h2b2	5.566	473.312	81.512	1941.887	8.962
Ctrl MO N-N	Non Clone- Non Clone	h2b2	5.566	409.137	113.49	2801.308	8.962
Ctrl MO N-N	Non Clone- Non Clone
Ctrl MO N-N	Non Clone- Non Clone	h2b3	9.996	611.023	88.734	2659.932	16.166
Ctrl MO N-N	Non Clone- Non Clone	h2b3	9.996	442.7	95.023	2188.605	16.166
Ctrl MO N-N	Non Clone- Non Clone	h2b3	9.996	341.411	41.666	1170.376	16.166
Ctrl MO N-N	Non Clone- Non Clone	h2b3	9.996	306.058	46.685	1278.644	16.166
Ctrl MO N-N	Non Clone- Non Clone
Ctrl MO N-N	Non Clone- Non Clone	h2b4	10.807	871.127	124.546	3038.502	17.484
Ctrl MO N-N	Non Clone- Non Clone	h2b4	10.807	641.699	75.706	2258.696	17.484
Ctrl MO N-N	Non Clone- Non Clone	h2b4	10.807	402.569	56.6	2116.91	17.484
Ctrl MO N-N	Non Clone- Non Clone	h2b4	10.807	313.213	30.392	1932.836	17.484
Ctrl MO N-N	Non Clone- Non Clone	h2b4	10.807	272.176	23.349	1906.849	17.484
Ctrl MO N-N	Non Clone- Non Clone
Ctrl MO N-N	Non Clone- Non Clone	h2b5	8.159	654.814	117.833	3118.431	13.179
Ctrl MO N-N	Non Clone- Non Clone	h2b5	8.159	432.148	42.163	1320.876	13.179
Ctrl MO N-N	Non Clone- Non Clone	h2b5	8.159	365.414	49.932	1691.824	13.179
Ctrl MO N-N	Non Clone- Non Clone	h2b5	8.159	358.4	49.928	1644.126	13.179
Ctrl MO N-N	Non Clone- Non Clone
Ctrl MO N-N	Non Clone- Non Clone	h2b6	8.375	486.613	48.139	2409.302	13.53
Ctrl MO N-N	Non Clone- Non Clone	h2b6	8.375	248.935	39.807	866.503	13.53
Ctrl MO N-N	Non Clone- Non Clone	h2b6	8.375	165.772	37.731	502.216	13.53
Ctrl MO N-N	Non Clone- Non Clone	h2b6	8.375	144.507	9.392	485.914	13.53
Ctrl MO N-N	Non Clone- Non Clone
Ctrl MO N-N	Non Clone- Non Clone	h2b7	12.644	639.785	54.176	3688.733	20.471
Ctrl MO N-N	Non Clone- Non Clone	h2b7	12.644	573.209	57.463	3088.49	20.471
Ctrl MO N-N	Non Clone- Non Clone	h2b7	12.644	350.332	57.53	3565.377	20.471
Ctrl MO N-N	Non Clone- Non Clone	h2b7	12.644	259.986	25.619	2807.969	20.471
Ctrl MO N-N	Non Clone- Non Clone	h2b7	12.644	232.367	30.682	1206.496	20.471
Ctrl MO N-N	Non Clone- Non Clone
Ctrl MO N-N	Non Clone- Non Clone	h2b8	11.239	715.363	114.616	3165.046	18.186
Ctrl MO N-N	Non Clone- Non Clone	h2b8	11.239	787.483	134.031	2575.214	18.186
Ctrl MO N-N	Non Clone- Non Clone	h2b8	11.239	743.348	112.058	2409.676	18.186
Ctrl MO N-N	Non Clone- Non Clone	h2b8	11.239	460.184	53.522	3720.399	18.186
Ctrl MO N-N	Non Clone- Non Clone	h2b8	11.239	268.426	48.711	1328.909	18.186
Ctrl MO N-N	Non Clone- Non Clone
Ctrl MO N-N	Non Clone- Non Clone	h2b9	13.292	577.56	42.86	2792.013	21.525
Ctrl MO N-N	Non Clone- Non Clone	h2b9	13.292	434.628	3.423	3394.407	21.525
Ctrl MO N-N	Non Clone- Non Clone	h2b9	13.292	233.282	23.769	993.76	21.525
Ctrl MO N-N	Non Clone- Non Clone	h2b9	13.292	152.782	13.991	681.985	21.525
Ctrl MO N-N	Non Clone- Non Clone
Ctrl MO N-N	Non Clone- Non Clone	h2b10	10.05	693.671	136.766	2859.606	16.254
Ctrl MO N-N	Non Clone- Non Clone	h2b10	10.05	601.429	114.928	1935.243	16.254
Ctrl MO N-N	Non Clone- Non Clone	h2b10	10.05	455.035	103.865	1602.552	16.254
Ctrl MO N-N	Non Clone- Non Clone	h2b10	10.05	350.1	75.374	1412.094	16.254
Ctrl MO N-N	Non Clone- Non Clone	h2b10	10.05	313.99	44.252	1888.326	16.254
Ctrl MO N-N	Non Clone- Non Clone
Ctrl MO N-N	Non Clone- Non Clone	h2b11	9.78	959.098	130.703	3575.421	15.814
Ctrl MO N-N	Non Clone- Non Clone	h2b11	9.78	1015.382	127.292	3701.763	15.814
Ctrl MO N-N	Non Clone- Non Clone	h2b11	9.78	883.506	162.819	3888.312	15.814
Ctrl MO N-N	Non Clone- Non Clone	h2b11	9.78	645.919	146.247	3375.309	15.814
Ctrl MO N-N	Non Clone- Non Clone	h2b11	9.78	402.842	42.368	1853.268	15.814
Ctrl MO N-N	Non Clone- Non Clone	h2b11	9.78	333.281	48.604	2677.286	15.814
Ctrl MO N-N	Non Clone- Non Clone
Ctrl MO N-N	Non Clone- Non Clone	h2b12	8.321	685.144	132.301	2598.548	13.442
Ctrl MO N-N	Non Clone- Non Clone	h2b12	8.321	633.238	128.869	2975.264	13.442
Ctrl MO N-N	Non Clone- Non Clone	h2b12	8.321	470.54	75.613	1935.297	13.442
Ctrl MO N-N	Non Clone- Non Clone	h2b12	8.321	324.14	77.534	1052.455	13.442
Ctrl MO N-N	Non Clone- Non Clone	h3b1	9.78	677.603	135.192	2519.66	15.814
Ctrl MO N-N	Non Clone- Non Clone	h3b1	9.78	551.213	124.64	2296.489	15.814
Ctrl MO N-N	Non Clone- Non Clone	h3b1	9.78	554.364	60.766	4078.112	15.814
Ctrl MO N-N	Non Clone- Non Clone	h3b1	9.78	519.99	33.537	3203.197	15.814
Ctrl MO N-N	Non Clone- Non Clone
Ctrl MO N-N	Non Clone- Non Clone	h3b2	7.673	720.933	138.874	2680.983	12.388
Ctrl MO N-N	Non Clone- Non Clone	h3b2	7.673	641.479	147.539	2393.76	12.388
Ctrl MO N-N	Non Clone- Non Clone	h3b2	7.673	414.69	68.164	1788.343	12.388
Ctrl MO N-N	Non Clone- Non Clone	h3b2	7.673	243.019	12.58	976.755	12.388
Ctrl MO N-N	Non Clone- Non Clone
Ctrl MO N-N	Non Clone- Non Clone	h3b3	11.833	681.741	150.175	2880.976	19.153
Ctrl MO N-N	Non Clone- Non Clone	h3b3	11.833	549.565	88.429	3041.285	19.153
Ctrl MO N-N	Non Clone- Non Clone	h3b3	11.833	375.361	63.797	2103.532	19.153
Ctrl MO N-N	Non Clone- Non Clone	h3b3	11.833	195.091	31.757	623.515	19.153
Ctrl MO N-N	Non Clone- Non Clone	h3b3	11.833	130.652	12.871	442.493	19.153
Ctrl MO N-N	Non Clone- Non Clone	h3b3	11.833	115.597	3.547	476.154	19.153
Ctrl MO N-N	Non Clone- Non Clone
Ctrl MO N-N	Non Clone- Non Clone	h3b4	7.078	696.628	86.363	3330.534	11.422
Ctrl MO N-N	Non Clone- Non Clone	h3b4	7.078	757.618	67.802	3210.588	11.422
Ctrl MO N-N	Non Clone- Non Clone	h3b4	7.078	785.138	95.61	3084.833	11.422
Ctrl MO N-N	Non Clone- Non Clone	h3b4	7.078	655.926	105.927	2999.012	11.422
Ctrl MO N-N	Non Clone- Non Clone	h3b4	7.078	328.361	42.699	1750.807	11.422
Ctrl MO N-N	Non Clone- Non Clone
Ctrl MO N-N	Non Clone- Non Clone	h3b5	9.726	653.719	126.226	4019.597	15.727
Ctrl MO N-N	Non Clone- Non Clone	h3b5	9.726	597.539	81.89	3137.221	15.727
Ctrl MO N-N	Non Clone- Non Clone	h3b5	9.726	430.153	64.24	2049.314	15.727
Ctrl MO N-N	Non Clone- Non Clone	h3b5	9.726	307.12	45.156	1364.34	15.727
Ctrl MO N-N	Non Clone- Non Clone	h3b5	9.726	281.184	49.334	2268.376	15.727
Ctrl MO N-N	Non Clone- Non Clone
Ctrl MO N-N	Non Clone- Non Clone	h3b6	4.593	711.734	48.456	2166.803	7.38
Ctrl MO N-N	Non Clone- Non Clone	h3b6	4.593	641.446	76.653	2122.702	7.38
Ctrl MO N-N	Non Clone- Non Clone	h3b6	4.593	387.788	47.957	1577.686	7.38
Ctrl MO N-N	Non Clone- Non Clone	h3b6	4.593	222.101	30.101	720.657	7.38
Ctrl MO N-N	Non Clone- Non Clone
Ctrl MO N-N	Non Clone- Non Clone	h3b7	9.726	714.589	74.477	2220.486	15.726
Ctrl MO N-N	Non Clone- Non Clone	h3b7	9.726	642.815	51.291	2943.27	15.726
Ctrl MO N-N	Non Clone- Non Clone	h3b7	9.726	455.98	50.684	3539.343	15.726
Ctrl MO N-N	Non Clone- Non Clone	h3b7	9.726	274.683	45.341	1249.544	15.726
Ctrl MO N-N	Non Clone- Non Clone	h3b7	9.726	217.67	33.633	1331.684	15.726
Ctrl MO N-N	Non Clone- Non Clone
Ctrl MO N-N	Non Clone- Non Clone	h3b8	7.727	642.453	130.351	1998.587	12.476
Ctrl MO N-N	Non Clone- Non Clone	h3b8	7.727	557.854	103.638	1748.195	12.476
Ctrl MO N-N	Non Clone- Non Clone	h3b8	7.727	428.122	34.587	1665.317	12.476
Ctrl MO N-N	Non Clone- Non Clone	h3b8	7.727	279.21	19.149	739.773	12.476
Ctrl MO N-N	Non Clone- Non Clone	h3b8	7.727	231.539	9.181	683.234	12.476
Ctrl MO N-N	Non Clone- Non Clone	h4b1	9.402	704.851	125.175	2375.936	15.2
Ctrl MO N-N	Non Clone- Non Clone	h4b1	9.402	594.607	94.051	2974.747	15.2
Ctrl MO N-N	Non Clone- Non Clone	h4b1	9.402	453.428	43.517	2475.019	15.2
Ctrl MO N-N	Non Clone- Non Clone	h4b1	9.402	399.46	39.17	1799.997	15.2
Ctrl MO N-N	Non Clone- Non Clone	h4b1	9.402	336.12	33.305	2104.641	15.2
Ctrl MO N-N	Non Clone- Non Clone
Ctrl MO N-N	Non Clone- Non Clone	h4b2	9.78	588.797	36.806	2421.777	15.815
Ctrl MO N-N	Non Clone- Non Clone	h4b2	9.78	531.871	21.489	1997.332	15.815
Ctrl MO N-N	Non Clone- Non Clone	h4b2	9.78	430.195	29.053	1520.416	15.815
Ctrl MO N-N	Non Clone- Non Clone	h4b2	9.78	338.579	50.696	1321.02	15.815
Ctrl MO N-N	Non Clone- Non Clone	h4b2	9.78	268.917	52.42	1253.862	15.815
Ctrl MO N-N	Non Clone- Non Clone	h4b2	9.78	209.761	34.587	1820.096	15.815
Ctrl MO N-N	Non Clone- Non Clone
Ctrl MO N-N	Non Clone- Non Clone	h4b3	9.672	546.534	126.647	2953.726	15.639
Ctrl MO N-N	Non Clone- Non Clone	h4b3	9.672	475.975	69.989	2196.177	15.639
Ctrl MO N-N	Non Clone- Non Clone	h4b3	9.672	395.874	54.54	1257.277	15.639
Ctrl MO N-N	Non Clone- Non Clone	h4b3	9.672	291.56	65.073	1227.855	15.639
Ctrl MO N-N	Non Clone- Non Clone	h4b3	9.672	195.711	9.998	674.878	15.639
Ctrl MO N-N	Non Clone- Non Clone	h4b3	9.672	132.408	16.996	667.209	15.639
Ctrl MO N-N	Non Clone- Non Clone
Ctrl MO N-N	Non Clone- Non Clone	h4b4	10.158	457.075	73.48	1975.195	16.43
Ctrl MO N-N	Non Clone- Non Clone	h4b4	10.158	455.825	71.876	1789.511	16.43
Ctrl MO N-N	Non Clone- Non Clone	h4b4	10.158	443.468	58.07	1535.134	16.43
Ctrl MO N-N	Non Clone- Non Clone	h4b4	10.158	363.878	80.103	1359.696	16.43
Ctrl MO N-N	Non Clone- Non Clone	h4b4	10.158	258.681	34.906	930.824	16.43
Ctrl MO N-N	Non Clone- Non Clone
Ctrl MO N-N	Non Clone- Non Clone	h4b5	8.267	472.552	81.069	1959.622	13.354
Ctrl MO N-N	Non Clone- Non Clone	h4b5	8.267	431.433	69.643	1769.622	13.354
Ctrl MO N-N	Non Clone- Non Clone	h4b5	8.267	368.017	66.058	1184.455	13.354
Ctrl MO N-N	Non Clone- Non Clone	h4b5	8.267	321.122	26.335	2264.158	13.354
Ctrl MO N-N	Non Clone- Non Clone	h4b5	8.267	302.853	22.571	4017.915	13.354
Ctrl MO N-N	Non Clone- Non Clone
Ctrl MO N-N	Non Clone- Non Clone	h4b6	8.862	707	141.215	2199.826	14.321
Ctrl MO N-N	Non Clone- Non Clone	h4b6	8.862	625.474	101.878	2160.33	14.321
Ctrl MO N-N	Non Clone- Non Clone	h4b6	8.862	507.3	75.29	2408.23	14.321
Ctrl MO N-N	Non Clone- Non Clone	h4b6	8.862	427.642	62.097	1837.553	14.321
Ctrl MO N-N	Non Clone- Non Clone
Ctrl MO N-N	Non Clone- Non Clone	h4b7	10.321	887.158	79.358	3149.253	16.693
Ctrl MO N-N	Non Clone- Non Clone	h4b7	10.321	818.26	129.917	2328.623	16.693
Ctrl MO N-N	Non Clone- Non Clone	h4b7	10.321	675.209	94.197	2008.677	16.693
Ctrl MO N-N	Non Clone- Non Clone	h4b7	10.321	517.93	77.34	1820.056	16.693
Ctrl MO N-N	Non Clone- Non Clone	h4b7	10.321	369.269	65.564	2012.136	16.693
Ctrl MO N-N	Non Clone- Non Clone	h4b7	10.321	349.638	19.415	2765.603	16.693
Ctrl MO N-N	Non Clone- Non Clone	h5b1	4.755	824.228	167.465	3976.367	7.644
Ctrl MO N-N	Non Clone- Non Clone	h5b1	4.755	633.418	143.46	2192.161	7.644
Ctrl MO N-N	Non Clone- Non Clone	h5b1	4.755	567.632	111.845	1542.833	7.644
Ctrl MO N-N	Non Clone- Non Clone	h5b1	4.755	533.752	93.636	1543.639	7.644
Ctrl MO N-N	Non Clone- Non Clone	h5b1	4.755	461.777	113.548	1499.097	7.644
Ctrl MO N-N	Non Clone- Non Clone	h5b1	4.755	366.596	124.598	917.71	7.644
Ctrl MO N-N	Non Clone- Non Clone	h5b1	4.755	325.18	77.36	1189.154	7.644
Ctrl MO N-N	Non Clone- Non Clone	h5b1	4.755	298.914	72.987	1096.671	7.644
Ctrl MO N-N	Non Clone- Non Clone
Ctrl MO N-N	Non Clone- Non Clone	h5b2	8.051	752.108	211.683	3728.16	13.003
Ctrl MO N-N	Non Clone- Non Clone	h5b2	8.051	684.573	207.618	3252.857	13.003
Ctrl MO N-N	Non Clone- Non Clone	h5b2	8.051	527.065	125.332	2255.912	13.003
Ctrl MO N-N	Non Clone- Non Clone	h5b2	8.051	406.057	107.921	3228.856	13.003
Ctrl MO N-N	Non Clone- Non Clone	h5b2	8.051	369.565	85.298	2283.495	13.003
Ctrl MO N-N	Non Clone- Non Clone	h5b2	8.051	334.553	83.735	1144.215	13.003
Ctrl MO N-N	Non Clone- Non Clone
Ctrl MO N-N	Non Clone- Non Clone	h5b3	9.132	461.532	0	2339.344	14.76
Ctrl MO N-N	Non Clone- Non Clone	h5b3	9.132	379.917	0	1856.747	14.76
Ctrl MO N-N	Non Clone- Non Clone	h5b3	9.132	314.369	0	1252.551	14.76
Ctrl MO N-N	Non Clone- Non Clone	h5b3	9.132	323.625	0	2394.76	14.76
Ctrl MO N-N	Non Clone- Non Clone	h5b3	9.132	358.728	0	2127.562	14.76
Ctrl MO N-N	Non Clone- Non Clone	h5b3	9.132	337.831	0	1539.763	14.76
Ctrl MO N-N	Non Clone- Non Clone
Ctrl MO N-N	Non Clone- Non Clone	h5b4	4.863	690.172	144.768	1671.375	7.819
Ctrl MO N-N	Non Clone- Non Clone	h5b4	4.863	534.795	110.567	1437.27	7.819
Ctrl MO N-N	Non Clone- Non Clone	h5b4	4.863	399.338	75.082	1222.13	7.819
Ctrl MO N-N	Non Clone- Non Clone	h5b4	4.863	255.679	54.861	996.05	7.819
Ctrl MO N-N	Non Clone- Non Clone	h5b4	4.863	139.81	11.069	827.754	7.819
Ctrl MO N-N	Non Clone- Non Clone	h5b4	4.863	104.929	8.424	908.402	7.819
Ctrl MO N-N	Non Clone- Non Clone
Ctrl MO N-N	Non Clone- Non Clone	h5b5	8.862	694.535	56.693	2854.137	14.321
Ctrl MO N-N	Non Clone- Non Clone	h5b5	8.862	647.915	76.179	2306.961	14.321
Ctrl MO N-N	Non Clone- Non Clone	h5b5	8.862	559.65	39.508	2190.203	14.321
Ctrl MO N-N	Non Clone- Non Clone	h5b5	8.862	376.915	9.808	1830.498	14.321
Ctrl MO N-N	Non Clone- Non Clone	h5b5	8.862	208.262	7.238	726.47	14.321
Ctrl MO N-N	Non Clone- Non Clone	h5b5	8.862	145.249	10.304	545.781	14.321
Ctrl MO N-N	Non Clone- Non Clone
Ctrl MO N-N	Non Clone- Non Clone	h5b6	7.997	551.781	110.426	2805.457	12.915
Ctrl MO N-N	Non Clone- Non Clone	h5b6	7.997	623.206	141.302	1942.629	12.915
Ctrl MO N-N	Non Clone- Non Clone	h5b6	7.997	546.022	102.7	1328.65	12.915
Ctrl MO N-N	Non Clone- Non Clone	h5b6	7.997	427.69	62.774	2044.027	12.915
Ctrl MO N-N	Non Clone- Non Clone	h5b6	7.997	408.731	30.046	2359.19	12.915
Ctrl MO N-N	Non Clone- Non Clone	h5b6	7.997	365.575	2.831	1715.878	12.915
Ctrl MO N-N	Non Clone- Non Clone
Ctrl MO N-N	Non Clone- Non Clone	h5b7	8.267	403.671	28.231	1946.032	13.355
Ctrl MO N-N	Non Clone- Non Clone	h5b7	8.267	237.446	14.507	1093.454	13.355
Ctrl MO N-N	Non Clone- Non Clone	h5b7	8.267	176.233	4.408	615.03	13.355
Ctrl MO N-N	Non Clone- Non Clone	h5b7	8.267	134.773	0.128	689.104	13.355
Ctrl MO N-N	Non Clone- Non Clone
Ctrl MO N-N	Non Clone- Non Clone	h5b8	9.942	387.002	48.816	1318.782	16.078
Ctrl MO N-N	Non Clone- Non Clone	h5b8	9.942	418.766	51.738	1877.738	16.078
Ctrl MO N-N	Non Clone- Non Clone	h5b8	9.942	417.866	67.711	1960.959	16.078
Ctrl MO N-N	Non Clone- Non Clone	h5b8	9.942	419.389	48.756	1575.753	16.078
Ctrl MO N-N	Non Clone- Non Clone	h5b8	9.942	404.908	12.973	1842.201	16.078
Ctrl MO N-N	Non Clone- Non Clone	h5b8	9.942	340.459	38.757	1833.535	16.078
Ctrl MO N-N	Non Clone- Non Clone
Ctrl MO N-N	Non Clone- Non Clone	h5b9	9.24	451.964	94.93	1485.823	14.936
Ctrl MO N-N	Non Clone- Non Clone	h5b9	9.24	396.855	76.103	1961.922	14.936
Ctrl MO N-N	Non Clone- Non Clone	h5b9	9.24	339.421	43.018	2509.106	14.936
Ctrl MO N-N	Non Clone- Non Clone	h5b9	9.24	294.245	27.005	1851.244	14.936
Ctrl MO N-N	Non Clone- Non Clone	h5b9	9.24	238.923	11.053	920.098	14.936
Ctrl MO N-N	Non Clone- Non Clone
Ctrl MO N-N	Non Clone- Non Clone	h5b10	7.727	667.984	142.563	3166.689	12.476
Ctrl MO N-N	Non Clone- Non Clone	h5b10	7.727	536.99	115.841	1319.372	12.476
Ctrl MO N-N	Non Clone- Non Clone	h5b10	7.727	414.287	74.836	2365.341	12.476
Ctrl MO N-N	Non Clone- Non Clone	h5b10	7.727	406.815	41.868	3897.949	12.476
Ctrl MO N-N	Non Clone- Non Clone	h5b10	7.727	385.186	9.999	4050.119	12.476
Ctrl MO N-N	Non Clone- Non Clone	h5b10	7.727	301.365	9.008	1467.928	12.476
Ctrl MO N-N	Non Clone- Non Clone
Ctrl MO N-N	Non Clone- Non Clone	h5b11	6.106	428.459	65.235	2491.398	9.84
Ctrl MO N-N	Non Clone- Non Clone	h5b11	6.106	327.93	60.347	1172.938	9.84
Ctrl MO N-N	Non Clone- Non Clone	h5b11	6.106	225.79	45.524	1405.907	9.84
Ctrl MO N-N	Non Clone- Non Clone	h5b11	6.106	181.371	27.891	848.769	9.84
Ctrl MO N-N	Non Clone- Non Clone	h5b11	6.106	127.701	22.511	577.679	9.84
Ctrl MO N-N	Non Clone- Non Clone
Ctrl MO N-N	Non Clone- Non Clone	h5b12	10.05	548.499	45.314	3361.771	16.244
Ctrl MO N-N	Non Clone- Non Clone	h5b12	10.05	539.923	59.323	2332.747	16.244
Ctrl MO N-N	Non Clone- Non Clone	h5b12	10.05	474.129	52.878	2415.396	16.244
Ctrl MO N-N	Non Clone- Non Clone	h5b12	10.05	359.855	28.472	3100.6	16.244
Ctrl MO N-N	Non Clone- Non Clone	h5b12	10.05	222.759	6.822	941.002	16.244
Ctrl MO N-N	Non Clone- Non Clone	h5b12	10.05	172.328	16.894	757.236	16.244
Ctrl MO N-N	Non Clone- Non Clone	h6b1	9.672	361.034	30.158	2014.303	15.639
Ctrl MO N-N	Non Clone- Non Clone	h6b1	9.672	384.818	35.148	2555.823	15.639
Ctrl MO N-N	Non Clone- Non Clone	h6b1	9.672	423.001	37.71	2554.542	15.639
Ctrl MO N-N	Non Clone- Non Clone	h6b1	9.672	359.86	38.262	1616.673	15.639
Ctrl MO N-N	Non Clone- Non Clone	h6b1	9.672	274.674	37.778	1194.046	15.639
Ctrl MO N-N	Non Clone- Non Clone	h6b1	9.672	226.725	37.218	1031.401	15.639
Ctrl MO N-N	Non Clone- Non Clone	h6b1	9.672	188.089	8.904	725.763	15.639
Ctrl MO N-N	Non Clone- Non Clone
Ctrl MO N-N	Non Clone- Non Clone	h6b2	9.618	510.028	39.547	3782.952	15.551
Ctrl MO N-N	Non Clone- Non Clone	h6b2	9.618	460.819	42.051	3991.232	15.551
Ctrl MO N-N	Non Clone- Non Clone	h6b2	9.618	385.569	27.251	2033.198	15.551
Ctrl MO N-N	Non Clone- Non Clone	h6b2	9.618	264.27	27.684	1240.354	15.551
Ctrl MO N-N	Non Clone- Non Clone	h6b2	9.618	188.575	19.439	725.933	15.551
Ctrl MO N-N	Non Clone- Non Clone	h6b2	9.618	165.99	9.869	758.921	15.551
Ctrl MO N-N	Non Clone- Non Clone
Ctrl MO N-N	Non Clone- Non Clone	h6b3	5.674	591.125	97.847	2378.331	9.137
Ctrl MO N-N	Non Clone- Non Clone	h6b3	5.674	544.43	114.521	2158.027	9.137
Ctrl MO N-N	Non Clone- Non Clone	h6b3	5.674	456.901	78.982	1559.693	9.137
Ctrl MO N-N	Non Clone- Non Clone	h6b3	5.674	369.668	15.247	1573.913	9.137
Ctrl MO N-N	Non Clone- Non Clone	h6b3	5.674	307.865	46.692	1540.016	9.137
Ctrl MO N-N	Non Clone- Non Clone	h6b3	5.674	210.314	19.141	955.6	9.137
Ctrl MO N-N	Non Clone- Non Clone
Ctrl MO N-N	Non Clone- Non Clone	h6b4	6.646	307.238	25.346	1616.91	10.719
Ctrl MO N-N	Non Clone- Non Clone	h6b4	6.646	244.305	24.585	1508.411	10.719
Ctrl MO N-N	Non Clone- Non Clone	h6b4	6.646	193.321	9.265	1313.536	10.719
Ctrl MO N-N	Non Clone- Non Clone	h6b4	6.646	133.486	5.677	602.754	10.719
Ctrl MO N-N	Non Clone- Non Clone	h6b4	6.646	104.104	5.034	425.36	10.719
Ctrl MO N-N	Non Clone- Non Clone	h6b4	6.646	80.73	0.893	510.377	10.719
Ctrl MO N-N	Non Clone- Non Clone
Ctrl MO N-N	Non Clone- Non Clone	h6b5	10.591	363.818	35.891	1475.557	17.132
Ctrl MO N-N	Non Clone- Non Clone	h6b5	10.591	477.894	89.14	1623.965	17.132
Ctrl MO N-N	Non Clone- Non Clone	h6b5	10.591	498.694	63.798	1701.025	17.132
Ctrl MO N-N	Non Clone- Non Clone	h6b5	10.591	490.762	42.117	1759.854	17.132
Ctrl MO N-N	Non Clone- Non Clone	h6b5	10.591	435.227	44.13	1861.298	17.132
Ctrl MO N-N	Non Clone- Non Clone	h6b5	10.591	343.013	3.275	2710.963	17.132
Ctrl MO N-N	Non Clone- Non Clone	h6b5	10.591	278.773	14.733	2116.499	17.132
Ctrl MO N-N	Non Clone- Non Clone
Ctrl MO N-N	Non Clone- Non Clone	h6b6	9.078	371.963	32.019	1935.62	14.672
Ctrl MO N-N	Non Clone- Non Clone	h6b6	9.078	333.476	24.046	2362.011	14.672
Ctrl MO N-N	Non Clone- Non Clone	h6b6	9.078	241.879	12.356	1988.832	14.672
Ctrl MO N-N	Non Clone- Non Clone	h6b6	9.078	148.456	3.399	1173.254	14.672
Ctrl MO N-N	Non Clone- Non Clone	h6b6	9.078	95.858	1.653	571.293	14.672
Ctrl MO N-N	Non Clone- Non Clone
Ctrl MO N-N	Non Clone- Non Clone	h6b7	8.645	481.726	80.279	2096.817	13.969
Ctrl MO N-N	Non Clone- Non Clone	h6b7	8.645	468.7	69.119	2188.438	13.969
Ctrl MO N-N	Non Clone- Non Clone	h6b7	8.645	465.276	83.222	1848.904	13.969
Ctrl MO N-N	Non Clone- Non Clone	h6b7	8.645	450.884	64.864	2457.631	13.969
Ctrl MO N-N	Non Clone- Non Clone	h6b7	8.645	400.631	51.681	2667.245	13.969
Ctrl MO N-N	Non Clone- Non Clone	h6b7	8.645	241.125	20.877	894.353	13.969
Ctrl MO N-N	Non Clone- Non Clone	h6b7	8.645	173.542	6.692	575.294	13.969
Ctrl MO N-N	Non Clone- Non Clone	h6b7	8.645	149.695	1.349	583.76	13.969
Ctrl MO N-N	Non Clone- Non Clone
Ctrl MO N-N	Non Clone- Non Clone	h6b8	8.483	619.639	82.752	2295.6	13.706
Ctrl MO N-N	Non Clone- Non Clone	h6b8	8.483	522.058	59.235	2599.186	13.706
Ctrl MO N-N	Non Clone- Non Clone	h6b8	8.483	410.946	19.789	1433.307	13.706
Ctrl MO N-N	Non Clone- Non Clone	h6b8	8.483	267.318	24.081	988.587	13.706
Ctrl MO N-N	Non Clone- Non Clone	h6b8	8.483	156.731	5.265	534.245	13.706
Ctrl MO N-N	Non Clone- Non Clone	h6b8	8.483	121.813	9.666	746.258	13.706
Ctrl MO N-N	Non Clone- Non Clone	h6b8	8.483	110.161	8.953	536.942	13.706
Ctrl MO N-N	Non Clone- Non Clone	h7b1	11.617	409.695	70.44	1528.264	18.802
Ctrl MO N-N	Non Clone- Non Clone	h7b1	11.617	256.869	29.793	857.227	18.802
Ctrl MO N-N	Non Clone- Non Clone	h7b1	11.617	143.242	7.036	1766.125	18.802
Ctrl MO N-N	Non Clone- Non Clone
Ctrl MO N-N	Non Clone- Non Clone	h7b2	9.618	356.587	51.874	2098.519	15.551
Ctrl MO N-N	Non Clone- Non Clone	h7b2	9.618	226.628	15.583	709.845	15.551
Ctrl MO N-N	Non Clone- Non Clone	h7b2	9.618	157.838	7.006	1100.938	15.551
Ctrl MO N-N	Non Clone- Non Clone	h7b2	9.618	124.753	14.436	795.99	15.551
Ctrl MO N-N	Non Clone- Non Clone
Ctrl MO N-N	Non Clone- Non Clone	h7b3	11.455	856.542	99.639	3929.93	18.538
Ctrl MO N-N	Non Clone- Non Clone	h7b3	11.455	730.002	83.099	4095	18.538
Ctrl MO N-N	Non Clone- Non Clone	h7b3	11.455	451.372	49.671	2632.525	18.538
Ctrl MO N-N	Non Clone- Non Clone	h7b3	11.455	408.812	45.174	2337.928	18.538
Ctrl MO N-N	Non Clone- Non Clone	h7b3	11.455	405.46	10.805	1904.608	18.538
Ctrl MO N-N	Non Clone- Non Clone
Ctrl MO N-N	Non Clone- Non Clone	h7b4	6.16	405.041	82.273	2162.567	9.928
Ctrl MO N-N	Non Clone- Non Clone	h7b4	6.16	248.113	36.989	750.576	9.928
Ctrl MO N-N	Non Clone- Non Clone	h7b4	6.16	147.583	23.351	1100.719	9.928
Ctrl MO N-N	Non Clone- Non Clone	h7b4	6.16	120.423	15.01	819.16	9.928
Ctrl MO N-N	Non Clone- Non Clone
Ctrl MO N-N	Non Clone- Non Clone	h7b5	8.375	481.06	77.489	3412.848	13.53
Ctrl MO N-N	Non Clone- Non Clone	h7b5	8.375	287.56	29.152	1860.951	13.53
Ctrl MO N-N	Non Clone- Non Clone	h7b5	8.375	221.795	2.952	1712.323	13.53
Ctrl MO N-N	Non Clone- Non Clone	h7b5	8.375	170.321	9.082	1127.514	13.53
Ctrl MO N-N	Non Clone- Non Clone
Ctrl MO N-N	Non Clone- Non Clone	h7b6	11.509	557.93	59.453	2892.798	18.626
Ctrl MO N-N	Non Clone- Non Clone	h7b6	11.509	500.136	31.852	3011.064	18.626
Ctrl MO N-N	Non Clone- Non Clone	h7b6	11.509	367.434	33.664	2404.067	18.626
Ctrl MO N-N	Non Clone- Non Clone	h7b6	11.509	224.423	20.448	1024.154	18.626
Ctrl MO N-N	Non Clone- Non Clone	h7b6	11.509	179.687	23.039	765.702	18.626
Ctrl MO N-N	Non Clone- Non Clone
Ctrl MO N-N	Non Clone- Non Clone	h7b7	7.457	485.249	55.512	3202.235	12.037
Ctrl MO N-N	Non Clone- Non Clone	h7b7	7.457	394.23	35.478	1287.629	12.037
Ctrl MO N-N	Non Clone- Non Clone	h7b7	7.457	230.512	11.7	760.025	12.037
Ctrl MO N-N	Non Clone- Non Clone	h7b7	7.457	195.322	10.748	999.24	12.037
Ctrl MO N-N	Non Clone- Non Clone	h7b7	7.457	184.769	12.753	1357.109	12.037
Ctrl MO N-N	Non Clone- Non Clone
Ctrl MO N-N	Non Clone- Non Clone	h7b8	7.889	470.282	21.114	4094.741	12.74
Ctrl MO N-N	Non Clone- Non Clone	h7b8	7.889	364.045	13.698	4095	12.74
Ctrl MO N-N	Non Clone- Non Clone	h7b8	7.889	154.27	15.5	976.701	12.74
Ctrl MO N-N	Non Clone- Non Clone	h7b8	7.889	115.645	13.047	480.846	12.74
Ctrl MO N-N	Non Clone- Non Clone	h7b8	7.889	94.443	4.431	360.963	12.74
Ctrl MO N-N	Non Clone- Non Clone
Ctrl MO N-N	Non Clone- Non Clone	h7b9	9.996	310.56	14.351	2088.002	16.166
Ctrl MO N-N	Non Clone- Non Clone	h7b9	9.996	128.908	11.164	555.236	16.166
Ctrl MO N-N	Non Clone- Non Clone	h7b9	9.996	101.716	6.841	426.972	16.166
Ctrl MO N-N	Non Clone- Non Clone	h7b9	9.996	79.743	2.074	377.8	16.166
Ctrl MO N-N	Non Clone- Non Clone
Ctrl MO N-N	Non Clone- Non Clone	h7b10	6.97	367.267	60.827	1104.438	11.246
Ctrl MO N-N	Non Clone- Non Clone	h7b10	6.97	346.064	46.354	1716.166	11.246
Ctrl MO N-N	Non Clone- Non Clone	h7b10	6.97	322.497	26.722	1273.545	11.246
Ctrl MO N-N	Non Clone- Non Clone	h7b10	6.97	294.741	49.94	997.588	11.246
Ctrl MO N-N	Non Clone- Non Clone
Ctrl MO N-N	Non Clone- Non Clone	h7b11	6.646	542.667	71.094	3726.696	10.719
Ctrl MO N-N	Non Clone- Non Clone	h7b11	6.646	472.321	107.187	3170.323	10.719
Ctrl MO N-N	Non Clone- Non Clone	h7b11	6.052	414.774	20.091	2928.928	9.752
Ctrl MO N-N	Non Clone- Non Clone	h7b11	6.052	194.079	21.979	1106.219	9.752
Ctrl MO N-N	Non Clone- Non Clone	h7b11	6.052	155.967	18.945	1158.95	9.752
Ctrl MO N-N	Non Clone- Non Clone
Ctrl MO N-N	Non Clone- Non Clone	h7b12	9.024	353.528	24.78	1528.298	14.584
Ctrl MO N-N	Non Clone- Non Clone	h7b12	9.024	179.227	8.371	779.362	14.584
Ctrl MO N-N	Non Clone- Non Clone	h7b12	9.024	132.352	1.672	577.555	14.584
Ctrl MO N-N	Non Clone- Non Clone	h7b12	9.024	103.693	0.258	460.489	14.584
Ctrl MO N-N	Non Clone- Non Clone	h7b12	9.024	93.524	2.206	622.326	14.584
Ecad MO C-C	Clone- Clone	h1b1	6.646	577.013	141.323	2597.145	10.719
Ecad MO C-C	Clone- Clone	h1b1	6.646	519.094	60.995	1961.672	10.719
Ecad MO C-C	Clone- Clone	h1b1	6.646	392.318	19.707	1633.604	10.719
Ecad MO C-C	Clone- Clone	h1b1	6.646	292.118	12.979	1350.367	10.719
Ecad MO C-C	Clone- Clone	h1b1	7.997	418.27	17.389	1709.637	12.915
Ecad MO C-C	Clone- Clone	h1b1	7.997	369.338	13.553	1773.24	12.915
Ecad MO C-C	Clone- Clone	h1b1	7.997	341.279	16.938	1841.563	12.915
Ecad MO C-C	Clone- Clone	h1b1	7.997	319.215	8.016	1769.275	12.915
Ecad MO C-C	Clone- Clone
Ecad MO C-C	Clone- Clone	h1b2	12.752	444.914	84.992	2494.397	20.647
Ecad MO C-C	Clone- Clone	h1b2	12.752	372.857	47.31	1592.361	20.647
Ecad MO C-C	Clone- Clone	h1b2	12.752	284.103	32.761	1160.269	20.647
Ecad MO C-C	Clone- Clone	h1b2	12.752	231.461	3.71	938.169	20.647
Ecad MO C-C	Clone- Clone	h1b2	12.752	207.434	10.704	1132.145	20.647
Ecad MO C-C	Clone- Clone	h1b2	12.752	194.236	10.313	1703.929	20.647
Ecad MO C-C	Clone- Clone	h2b1	9.672	878.896	110.277	3950.087	15.639
Ecad MO C-C	Clone- Clone	h2b1	9.672	918.586	76.927	4008.213	15.639
Ecad MO C-C	Clone- Clone	h2b1	9.672	747.787	72.776	2914.029	15.639
Ecad MO C-C	Clone- Clone	h2b1	9.672	489.93	42.42	3577.438	15.639
Ecad MO C-C	Clone- Clone	h2b1	9.672	282.318	55.906	1035.48	15.639
Ecad MO C-C	Clone- Clone	h2b1	9.672	234.636	38.837	940.101	15.639
Ecad MO C-C	Clone- Clone
Ecad MO C-C	Clone- Clone	h2b2	6.052	1073.269	248.493	3643.959	9.752
Ecad MO C-C	Clone- Clone	h2b2	6.052	832.375	235.906	2477.373	9.752
Ecad MO C-C	Clone- Clone	h2b2	6.052	506.993	138.712	1448.128	9.752
Ecad MO C-C	Clone- Clone	h2b2	6.052	374.25	78.492	3162.736	9.752
Ecad MO C-C	Clone- Clone
Ecad MO C-C	Clone- Clone	h2b3	11.131	780.708	103.95	3293.245	18.011
Ecad MO C-C	Clone- Clone	h2b3	11.131	652.605	95.054	2583.202	18.011
Ecad MO C-C	Clone- Clone	h2b3	11.131	520.912	81.892	1744.353	18.011
Ecad MO C-C	Clone- Clone	h2b3	11.131	413.928	76.337	1908.511	18.011
Ecad MO C-C	Clone- Clone	h2b3	11.131	410.473	63.585	2863.161	18.011
Ecad MO C-C	Clone- Clone	h2b3	11.131	516.507	48.706	3839.008	18.011
Ecad MO C-C	Clone- Clone
Ecad MO C-C	Clone- Clone	h2b4	10.861	1055.306	159.335	3619.011	17.571
Ecad MO C-C	Clone- Clone	h2b4	10.861	868.427	209.023	3874.689	17.571
Ecad MO C-C	Clone- Clone	h2b4	10.861	665.13	117.83	3732.734	17.571
Ecad MO C-C	Clone- Clone	h2b4	10.861	438.58	54.745	2803.921	17.571
Ecad MO C-C	Clone- Clone	h2b4	10.861	292.209	30.852	1399.138	17.571
Ecad MO C-C	Clone- Clone
Ecad MO C-C	Clone- Clone	h2b5	12.428	1200.265	251.324	3844.316	20.12
Ecad MO C-C	Clone- Clone	h2b5	12.428	1068.675	262.558	3580.106	20.12
Ecad MO C-C	Clone- Clone	h2b5	12.428	843.002	131.87	3471.079	20.12
Ecad MO C-C	Clone- Clone	h2b5	12.428	578.008	114.942	3806.542	20.12
Ecad MO C-C	Clone- Clone	h2b5	12.428	354.958	64.067	1337.32	20.12
Ecad MO C-C	Clone- Clone	h2b5	12.428	315.802	51.865	1884.703	20.12
Ecad MO C-C	Clone- Clone	h3b1	8.051	1032.139	231.469	4095	13.002
Ecad MO C-C	Clone- Clone	h3b1	8.051	989.219	279.703	3753.396	13.002
Ecad MO C-C	Clone- Clone	h3b1	8.051	870.863	185.001	4095	13.002
Ecad MO C-C	Clone- Clone	h3b1	8.051	544.615	116.096	1859.354	13.002
Ecad MO C-C	Clone- Clone	h3b1	8.051	410.091	18.43	1105.933	13.002
Ecad MO C-C	Clone- Clone	h3b1	8.051	385.18	28.368	1488.442	13.002
Ecad MO C-C	Clone- Clone
Ecad MO C-C	Clone- Clone	h3b2	13.509	964.931	150.322	2821.901	21.877
Ecad MO C-C	Clone- Clone	h3b2	13.509	946.389	179.428	3923.44	21.877
Ecad MO C-C	Clone- Clone	h3b2	13.509	912.965	164.187	4095	21.877
Ecad MO C-C	Clone- Clone	h3b2	13.509	626.397	146.126	3888.727	21.877
Ecad MO C-C	Clone- Clone	h3b2	13.509	411.865	69.291	1272.165	21.877
Ecad MO C-C	Clone- Clone
Ecad MO C-C	Clone- Clone	h3b3	8.7	949.447	190.393	3435.681	14.057
Ecad MO C-C	Clone- Clone	h3b3	8.7	947.092	281.945	3368.965	14.057
Ecad MO C-C	Clone- Clone	h3b3	8.7	905.485	227.246	3367.473	14.057
Ecad MO C-C	Clone- Clone	h3b3	8.7	850.18	178.238	3267.664	14.057
Ecad MO C-C	Clone- Clone	h3b3	8.7	658.438	56.468	3041.273	14.057
Ecad MO C-C	Clone- Clone	h3b3	8.7	350.533	11.923	1269.798	14.057
Ecad MO C-C	Clone- Clone
Ecad MO C-C	Clone- Clone	h3b4	5.511	1195.867	194.688	3438.452	8.874
Ecad MO C-C	Clone- Clone	h3b4	5.511	1009.02	261.043	2929.606	8.874
Ecad MO C-C	Clone- Clone	h3b4	5.511	600.313	251.664	2002.677	8.874
Ecad MO C-C	Clone- Clone	h3b4	5.511	401.319	115.996	1247.694	8.874
Ecad MO C-C	Clone- Clone
Ecad MO C-C	Clone- Clone	h3b5	2.918	2930.843	1108.746	4095	4.657
Ecad MO C-C	Clone- Clone	h3b5	2.918	2304.691	1059.957	3873.294	4.657
Ecad MO C-C	Clone- Clone	h3b5	2.918	1679.27	757.747	3187.401	4.657
Ecad MO C-C	Clone- Clone	h3b5	2.918	1036.333	565.949	2673.274	4.657
Ecad MO C-C	Clone- Clone	h3b5	2.918	535.577	175.85	1114.849	4.657
Ecad MO C-C	Clone- Clone	h3b5	2.918	334.877	82.248	997.153	4.657
Ecad MO C-C	Clone- Clone
Ecad MO C-C	Clone- Clone	h3b6	10.807	1553.659	403.89	3974.228	17.484
Ecad MO C-C	Clone- Clone	h3b6	10.807	1315.323	306.546	3300.241	17.484
Ecad MO C-C	Clone- Clone	h3b6	10.807	1007.761	225.706	3508.33	17.484
Ecad MO C-C	Clone- Clone	h3b6	10.807	519.633	117.961	1380.683	17.484
Ecad MO C-C	Clone- Clone	h3b6	10.807	338.919	33.518	1638.895	17.484
Ecad MO C-C	Clone- Clone
Ecad MO C-C	Clone- Clone	h3b7	9.348	1838.921	385.907	4095	15.112
Ecad MO C-C	Clone- Clone	h3b7	9.348	1478.587	358.356	4095	15.112
Ecad MO C-C	Clone- Clone	h3b7	9.348	1191.066	155.509	3786.488	15.112
Ecad MO C-C	Clone- Clone	h3b7	9.348	855.248	189.568	2328.98	15.112
Ecad MO C-C	Clone- Clone	h3b7	9.348	436.539	84.66	1411.536	15.112
Ecad MO C-C	Clone- Clone	h3b7	9.348	261.7	48.635	992.911	15.112
Ecad MO C-C	Clone- Clone
Ecad MO C-C	Clone- Clone	h3b8	9.672	1641.601	332.151	4094.632	15.639
Ecad MO C-C	Clone- Clone	h3b8	9.672	1462.831	182.266	4037.129	15.639
Ecad MO C-C	Clone- Clone	h3b8	9.672	1228.848	196.001	3669.48	15.639
Ecad MO C-C	Clone- Clone	h3b8	9.672	865.823	118.586	2591.839	15.639
Ecad MO C-C	Clone- Clone	h3b8	9.672	545.887	132.578	2110.756	15.639
Ecad MO C-C	Clone- Clone	h3b8	9.672	441.04	58.82	1591.108	15.639
Ecad MO C-C	Clone- Clone
Ecad MO C-C	Clone- Clone	h3b9	8.754	1064.319	247.842	3674.003	14.145
Ecad MO C-C	Clone- Clone	h3b9	8.754	619.134	141.527	2298.219	14.145
Ecad MO C-C	Clone- Clone	h3b9	8.754	466.785	101.861	1364.899	14.145
Ecad MO C-C	Clone- Clone	h3b9	8.754	408.321	92.102	1511.069	14.145
Ecad MO C-C	Clone- Clone	h3b9	8.754	436.707	94.439	2446.665	14.145
Ecad MO C-C	Clone- Clone
Ecad MO C-C	Clone- Clone	h3b10	7.943	1098.817	311.933	3026.256	12.827
Ecad MO C-C	Clone- Clone	h3b10	7.943	1005.764	168.801	2675.15	12.827
Ecad MO C-C	Clone- Clone	h3b10	7.943	920.356	113.457	3264.291	12.827
Ecad MO C-C	Clone- Clone	h3b10	7.943	564.406	114.156	1790.482	12.827
Ecad MO C-C	Clone- Clone	h3b10	7.943	398.717	45.443	1768.317	12.827
Ecad MO C-C	Clone- Clone	h3b10	7.943	363.912	42.264	1764.918	12.827
Ecad MO C-C	Clone- Clone	h3b10	7.943	347.339	44.809	2063.708	12.827
Ecad MO C-C	Clone- Clone
Ecad MO C-C	Clone- Clone	h3b11	8.7	833.464	208.248	4095	14.057
Ecad MO C-C	Clone- Clone	h3b11	8.7	814.995	144.087	2060.778	14.057
Ecad MO C-C	Clone- Clone	h3b11	8.7	717.584	174.306	2333.24	14.057
Ecad MO C-C	Clone- Clone	h3b11	8.7	548.096	109.732	2222.825	14.057
Ecad MO C-C	Clone- Clone	h3b11	8.7	412.882	59.071	2184.635	14.057
Ecad MO C-C	Clone- Clone	h3b11	8.7	347.905	72.272	983.627	14.057
Ecad MO C-C	Clone- Clone
Ecad MO C-C	Clone- Clone	h3b12	6.484	734.354	145.474	2073.913	10.455
Ecad MO C-C	Clone- Clone	h3b12	6.484	778.728	206.422	3733.33	10.455
Ecad MO C-C	Clone- Clone	h3b12	6.484	598.368	135.289	2954.951	10.455
Ecad MO C-C	Clone- Clone	h3b12	6.052	1276.446	129.842	4095	9.752
Ecad MO C-C	Clone- Clone	h3b12	6.052	1200.591	87.435	4083.199	9.752
Ecad MO C-C	Clone- Clone	h3b12	6.052	828.439	94.994	2561.862	9.752
Ecad MO C-C	Clone- Clone	h3b12	6.052	418.072	68.211	1835.205	9.752
Ecad MO C-C	Clone- Clone	h3b12	6.052	344.917	24.019	3070.489	9.752
Ecad MO C-C	Clone- Clone	h4b1	10.591	794.127	105.914	3520.764	17.131
Ecad MO C-C	Clone- Clone	h4b1	10.591	883.846	170.074	4064.988	17.131
Ecad MO C-C	Clone- Clone	h4b1	10.591	780.567	160.971	3010.347	17.131
Ecad MO C-C	Clone- Clone	h4b1	10.591	411.876	80.283	1823.323	17.131
Ecad MO C-C	Clone- Clone	h4b1	10.591	256.286	39.376	1444.742	17.131
Ecad MO C-C	Clone- Clone
Ecad MO C-C	Clone- Clone	h4b2	9.348	992.817	176.23	2967.765	15.112
Ecad MO C-C	Clone- Clone	h4b2	9.348	1024.862	117.678	3562.863	15.112
Ecad MO C-C	Clone- Clone	h4b2	9.348	885.673	174.155	3371.497	15.112
Ecad MO C-C	Clone- Clone	h4b2	9.348	505.159	78.209	2115.101	15.112
Ecad MO C-C	Clone- Clone	h4b2	9.348	291.795	34.719	757.061	15.112
Ecad MO C-C	Clone- Clone
Ecad MO C-C	Clone- Clone	h4b3	11.131	639.538	103.965	2354.13	18.011
Ecad MO C-C	Clone- Clone	h4b3	11.131	568.495	46.773	3460.607	18.011
Ecad MO C-C	Clone- Clone	h4b3	12.212	698.741	52.747	2567.276	19.768
Ecad MO C-C	Clone- Clone	h4b3	12.212	381.467	46.205	1332.661	19.768
Ecad MO C-C	Clone- Clone	h4b3	12.212	256.457	27.609	934.013	19.768
Ecad MO C-C	Clone- Clone
Ecad MO C-C	Clone- Clone	h4b4	8.429	594.87	129.587	3930.463	13.618
Ecad MO C-C	Clone- Clone	h4b4	8.429	751.01	73.689	3630.481	13.618
Ecad MO C-C	Clone- Clone	h4b4	8.429	613.398	136.748	2722.064	13.618
Ecad MO C-C	Clone- Clone	h4b4	8.429	376.578	80.876	952.97	13.618
Ecad MO C-C	Clone- Clone	h4b4	8.429	278.184	61.756	1416.85	13.618
Ecad MO C-C	Clone- Clone	h4b4	8.429	221.928	45.127	1090.839	13.618
Ecad MO C-C	Clone- Clone
Ecad MO C-C	Clone- Clone	h4b5	11.023	855.983	99.816	4078.43	17.835
Ecad MO C-C	Clone- Clone	h4b5	11.023	545.074	135.212	1942.899	17.835
Ecad MO C-C	Clone- Clone	h4b5	11.023	365.742	100.963	2255.608	17.835
Ecad MO C-C	Clone- Clone	h4b5	11.023	318.386	48.941	2749.825	17.835
Ecad MO C-C	Clone- Clone
Ecad MO C-C	Clone- Clone	h4b6	9.564	1105.034	210.819	3882.157	15.463
Ecad MO C-C	Clone- Clone	h4b6	9.564	1071.347	152.127	3977.356	15.463
Ecad MO C-C	Clone- Clone	h4b6	9.564	729.14	93.185	2617.563	15.463
Ecad MO C-C	Clone- Clone	h4b6	13.346	754.556	121.038	3894.285	21.567
Ecad MO C-C	Clone- Clone	h4b6	13.346	571.138	53.938	2350.751	21.567
Ecad MO C-C	Clone- Clone	h4b6	13.346	508.863	121.474	3252.027	21.567
Ecad MO C-C	Clone- Clone
Ecad MO C-C	Clone- Clone	h4b7	9.672	754.712	90.284	3653.465	15.639
Ecad MO C-C	Clone- Clone	h4b7	9.672	756.743	93.981	3912.43	15.639
Ecad MO C-C	Clone- Clone	h4b7	9.672	589.568	55.677	2024.985	15.639
Ecad MO C-C	Clone- Clone	h4b7	9.672	440.454	71.401	1605.611	15.639
Ecad MO C-C	Clone- Clone	h4b7	9.672	342.996	87.766	1881.476	15.639
Ecad MO C-C	Clone- Clone
Ecad MO C-C	Clone- Clone	h4b8	13.076	768.888	181.16	3255.249	21.174
Ecad MO C-C	Clone- Clone	h4b8	13.076	936.484	202.58	3479.711	21.174
Ecad MO C-C	Clone- Clone	h4b8	13.076	822.049	178.081	2576.99	21.174
Ecad MO C-C	Clone- Clone	h4b8	13.076	662.221	156.775	1842.662	21.174
Ecad MO C-C	Clone- Clone	h4b8	13.076	495.565	65.468	1715.967	21.174
Ecad MO C-C	Clone- Clone	h4b8	13.076	462.873	71.079	2597.853	21.174
Ecad MO C-C	Clone- Clone
Ecad MO C-C	Clone- Clone	h4b9	7.781	1048.199	190.455	4077.01	12.564
Ecad MO C-C	Clone- Clone	h4b9	7.781	1264.327	96.188	4095	12.564
Ecad MO C-C	Clone- Clone	h4b9	7.781	840.11	149.785	3720.212	12.564
Ecad MO C-C	Clone- Clone	h4b9	7.781	468.171	101.263	1319.174	12.564
Ecad MO C-C	Clone- Clone	h4b9	7.781	330.06	105.797	914.153	12.564
Ecad MO C-C	Clone- Clone
Ecad MO C-C	Clone- Clone	h4b10	12.482	1341.844	245.334	4095	20.207
Ecad MO C-C	Clone- Clone	h4b10	12.482	1369.586	196.679	4095	20.207
Ecad MO C-C	Clone- Clone	h4b10	12.482	838.8	121.944	3643.687	20.207
Ecad MO C-C	Clone- Clone	h4b10	12.482	501.923	87.886	2244.188	20.207
Ecad MO C-C	Clone- Clone	h4b10	12.482	340.131	21.018	1073.298	20.207
Ecad MO C-C	Clone- Clone	h4b10	12.482	231.802	33.996	800.688	20.207
Ecad MO C-C	Clone- Clone
Ecad MO C-C	Clone- Clone	h4b11	9.456	952.76	189.741	4030.124	15.287
Ecad MO C-C	Clone- Clone	h4b11	9.456	871.264	106.865	3048.235	15.287
Ecad MO C-C	Clone- Clone	h4b11	9.456	610.605	85.472	2509.113	15.287
Ecad MO C-C	Clone- Clone	h4b11	9.456	419.662	60.306	1553.929	15.287
Ecad MO C-C	Clone- Clone	h4b11	9.456	251.583	11.733	976.926	15.287
Ecad MO C-C	Clone- Clone	h5b1	11.077	1467.745	357.117	3675.872	17.923
Ecad MO C-C	Clone- Clone	h5b1	11.077	1294.07	313.877	3940.915	17.923
Ecad MO C-C	Clone- Clone	h5b1	11.077	1035.381	236.975	4005.496	17.923
Ecad MO C-C	Clone- Clone	h5b1	11.077	696.258	184.382	2684.312	17.923
Ecad MO C-C	Clone- Clone	h5b1	11.077	395.961	55.931	1824.503	17.923
Ecad MO C-C	Clone- Clone	h5b1	11.077	241.633	36.152	1619.888	17.923
Ecad MO C-C	Clone- Clone	h5b1	11.077	213.337	34.014	993.195	17.923
Ecad MO C-C	Clone- Clone
Ecad MO C-C	Clone- Clone	h5b2	6.97	1534.108	487.255	3742.281	11.246
Ecad MO C-C	Clone- Clone	h5b2	6.97	1044.119	192.848	4090.971	11.246
Ecad MO C-C	Clone- Clone	h5b2	6.97	668.067	180.994	2082.333	11.246
Ecad MO C-C	Clone- Clone	h5b2	6.97	469.672	112.389	1673.283	11.246
Ecad MO C-C	Clone- Clone	h5b2	6.97	338.153	67.087	2596.991	11.246
Ecad MO C-C	Clone- Clone	h5b2	6.97	223.312	30.819	2128.47	11.246
Ecad MO C-C	Clone- Clone
Ecad MO C-C	Clone- Clone	h5b3	8.97	1311.867	307.454	4082.436	14.497
Ecad MO C-C	Clone- Clone	h5b3	8.97	909.577	228.877	2772.502	14.497
Ecad MO C-C	Clone- Clone	h5b3	8.97	600.314	219.074	2069.176	14.497
Ecad MO C-C	Clone- Clone	h5b3	8.97	409.168	86.02	1559.173	14.497
Ecad MO C-C	Clone- Clone	h5b3	8.97	349.101	34.467	1027.19	14.497
Ecad MO C-C	Clone- Clone	h5b3	8.97	363.057	36.7	1137.33	14.497
Ecad MO C-C	Clone- Clone
Ecad MO C-C	Clone- Clone	h5b4	8.808	2059.624	521.052	4095	14.233
Ecad MO C-C	Clone- Clone	h5b4	8.808	1978.985	451.078	4095	14.233
Ecad MO C-C	Clone- Clone	h5b4	8.808	1362.439	289.637	4077.108	14.233
Ecad MO C-C	Clone- Clone	h5b4	8.808	683.945	193.528	2235.372	14.233
Ecad MO C-C	Clone- Clone	h5b4	8.808	576.127	170.475	2104.152	14.233
Ecad MO C-C	Clone- Clone	h5b4	8.808	591.876	120.093	2329.801	14.233
Ecad MO C-C	Clone- Clone
Ecad MO C-C	Clone- Clone	h5b5	12.752	1521.005	451.385	4091.755	20.647
Ecad MO C-C	Clone- Clone	h5b5	12.752	1570.218	371.93	4032.219	20.647
Ecad MO C-C	Clone- Clone	h5b5	12.752	1090.293	295.99	3866.366	20.647
Ecad MO C-C	Clone- Clone	h5b5	12.752	709.205	190.896	3779.103	20.647
Ecad MO C-C	Clone- Clone	h5b5	12.752	454.727	159.136	2115.494	20.647
Ecad MO C-C	Clone- Clone	h5b5	12.752	282.798	70.64	950.087	20.647
Ecad MO C-C	Clone- Clone
Ecad MO C-C	Clone- Clone	h5b6	8.375	1259.205	118.517	4095	13.53
Ecad MO C-C	Clone- Clone	h5b6	8.375	781.405	65.608	4080.92	13.53
Ecad MO C-C	Clone- Clone	h5b6	8.375	448.769	88.007	2705.843	13.53
Ecad MO C-C	Clone- Clone	h5b6	8.375	304.443	57.37	1210.787	13.53
Ecad MO C-C	Clone- Clone	h5b6	8.375	215.854	34.495	990.024	13.53
Ecad MO C-C	Clone- Clone	h5b6	8.375	168.152	16.642	1163.694	13.53
Ecad MO C-C	Clone- Clone	h5b6	8.375	159.815	14.766	758.169	13.53
Ecad MO C-C	Clone- Clone
Ecad MO C-C	Clone- Clone	h5b7	6.862	1024.527	91.853	3456.924	11.07
Ecad MO C-C	Clone- Clone	h5b7	6.862	898.134	95.961	3612.022	11.07
Ecad MO C-C	Clone- Clone	h5b7	6.862	795.754	66.025	3945.633	11.07
Ecad MO C-C	Clone- Clone	h5b7	6.862	679.301	24.148	4095	11.07
Ecad MO C-C	Clone- Clone	h5b7	6.862	487.038	38.178	4008.668	11.07
Ecad MO C-C	Clone- Clone	h5b7	6.862	246.539	20.886	1346.828	11.07
Ecad MO C-C	Clone- Clone	h5b7	6.862	206.474	12.919	1180.595	11.07
Ecad MO C-C	Clone- Clone
Ecad MO C-C	Clone- Clone	h5b8	9.348	1001.979	161.234	4095	15.11
Ecad MO C-C	Clone- Clone	h5b8	9.348	890.273	110.876	4095	15.11
Ecad MO C-C	Clone- Clone	h5b8	9.348	564.125	82.986	3110.843	15.11
Ecad MO C-C	Clone- Clone	h5b8	9.348	378.225	54.935	1158.553	15.11
Ecad MO C-C	Clone- Clone	h5b8	9.348	261.458	41.507	902.737	15.11
Ecad MO C-C	Clone- Clone	h5b8	9.348	201.805	29.25	1312.19	15.11
Ecad MO C-C	Clone- Clone
Ecad MO C-C	Clone- Clone	h5b9	8.97	783.559	124.449	2270.07	14.495
Ecad MO C-C	Clone- Clone	h5b9	8.97	894.553	78.028	4037.698	14.495
Ecad MO C-C	Clone- Clone	h5b9	8.97	759.16	64.887	3385.337	14.495
Ecad MO C-C	Clone- Clone	h5b9	8.97	594.693	59.533	2574.264	14.495
Ecad MO C-C	Clone- Clone	h5b9	8.97	419.816	37.634	2054.246	14.495
Ecad MO C-C	Clone- Clone	h5b9	8.97	243.989	27.766	930.897	14.495
Ecad MO C-C	Clone- Clone	h5b9	8.97	132.759	13.034	580.863	14.495
Ecad MO C-C	Clone- Clone
Ecad MO C-C	Clone- Clone	h5b10	8.375	1045.456	85.505	4085.002	13.53
Ecad MO C-C	Clone- Clone	h5b10	8.375	1116.464	205.37	4094.325	13.53
Ecad MO C-C	Clone- Clone	h5b10	8.375	994.777	169.974	3670.818	13.53
Ecad MO C-C	Clone- Clone	h5b10	8.375	846.004	117.429	3311.613	13.53
Ecad MO C-C	Clone- Clone	h5b10	8.375	634.039	124.882	3604.099	13.53
Ecad MO C-C	Clone- Clone	h5b10	8.375	458.356	73.254	3350.53	13.53
Ecad MO C-C	Clone- Clone	h5b10	8.375	311.335	46.751	1552.283	13.53
Ecad MO C-C	Clone- Clone	h5b10	8.375	289.495	31.107	1200.36	13.53
Ecad MO C-C	Clone- Clone	h5b10	8.375	288.44	22.528	1264.169	13.53
Ecad MO C-C	Clone- Clone	h6b1	11.725	1273.42	177.456	3591.284	18.977
Ecad MO C-C	Clone- Clone	h6b1	11.725	1142.885	134.523	4094.89	18.977
Ecad MO C-C	Clone- Clone	h6b1	11.725	687.75	173.099	2826.705	18.977
Ecad MO C-C	Clone- Clone	h6b1	10.158	976.936	176.988	3031.777	16.43
Ecad MO C-C	Clone- Clone	h6b1	10.158	780.987	136.843	2053.62	16.43
Ecad MO C-C	Clone- Clone	h6b1	10.158	546.626	107.102	1718.764	16.43
Ecad MO C-C	Clone- Clone	h6b1	10.158	401.208	67.1	1642.909	16.43
Ecad MO C-C	Clone- Clone
Ecad MO C-C	Clone- Clone	h6b2	10.05	1393.779	523.03	3398.644	16.254
Ecad MO C-C	Clone- Clone	h6b2	10.05	1293.327	326.376	4000.178	16.254
Ecad MO C-C	Clone- Clone	h6b2	10.05	919.142	233.341	3132.752	16.254
Ecad MO C-C	Clone- Clone	h6b2	10.05	508.285	114.994	2019.481	16.254
Ecad MO C-C	Clone- Clone	h6b2	10.05	349.185	51.012	1326.185	16.254
Ecad MO C-C	Clone- Clone	h6b2	10.05	371.254	27.744	3234.162	16.254
Ecad MO C-C	Clone- Clone	h7b1	10.483	1336.381	221.589	4053.554	16.957
Ecad MO C-C	Clone- Clone	h7b1	10.483	1123.917	255.985	3351.183	16.957
Ecad MO C-C	Clone- Clone	h7b1	10.483	1061.824	241.558	3466.071	16.957
Ecad MO C-C	Clone- Clone	h7b1	10.483	878.023	146.535	2732.026	16.957
Ecad MO C-C	Clone- Clone	h7b1	10.483	713.572	195.188	3189.438	16.957
Ecad MO C-C	Clone- Clone	h7b1	10.483	484.437	149.375	1951.508	16.957
Ecad MO C-C	Clone- Clone	h7b1	10.483	442.786	88.318	1905.244	16.957
Ecad MO C-C	Clone- Clone
Ecad MO C-C	Clone- Clone	h7b2	10.483	1432.216	212.199	4095	16.955
Ecad MO C-C	Clone- Clone	h7b2	10.483	1312.82	202.392	4095	16.955
Ecad MO C-C	Clone- Clone	h7b2	10.483	1238.432	196.443	4095	16.955
Ecad MO C-C	Clone- Clone	h7b2	10.483	935.548	165.326	3954.91	16.955
Ecad MO C-C	Clone- Clone	h7b2	10.483	630.928	117.063	2222.699	16.955
Ecad MO C-C	Clone- Clone	h7b2	10.483	375.108	38.663	1286.285	16.955
Ecad MO C-C	Clone- Clone
Ecad MO C-C	Clone- Clone	h7b3	17.129	1155.374	113.741	4095	27.756
Ecad MO C-C	Clone- Clone	h7b3	17.129	1154.05	124.259	4095	27.756
Ecad MO C-C	Clone- Clone	h7b3	17.129	754.994	128.765	2952.106	27.756
Ecad MO C-C	Clone- Clone	h7b3	17.129	546.725	92.185	2885.423	27.756
Ecad MO C-C	Clone- Clone	h7b3	17.129	455.649	89.598	1730.693	27.756
Ecad MO C-C	Clone- Clone
Ecad MO C-C	Clone- Clone	h7b4	14.697	1088.082	202.652	3978.267	23.81
Ecad MO C-C	Clone- Clone	h7b4	14.697	1061.07	162.76	3942.86	23.81
Ecad MO C-C	Clone- Clone	h7b4	14.697	995.671	194.163	3759.874	23.81
Ecad MO C-C	Clone- Clone	h7b4	14.697	886.615	131.425	3490.562	23.81
Ecad MO C-C	Clone- Clone	h7b4	10.158	1216.017	180.691	3420.174	16.43
Ecad MO C-C	Clone- Clone	h7b4	10.158	965.349	275.668	3467.816	16.43
Ecad MO C-C	Clone- Clone	h7b4	10.158	714.247	216.868	3032.518	16.43
Ecad MO C-C	Clone- Clone	h7b4	10.158	566.303	174.964	2154.233	16.43
Ecad MO C-C	Clone- Clone
Ecad MO C-C	Clone- Clone	h7b5	13.346	1288.183	209.02	4095	21.613
Ecad MO C-C	Clone- Clone	h7b5	13.346	1026.054	220.628	4095	21.613
Ecad MO C-C	Clone- Clone	h7b5	13.346	922	169.205	4094.855	21.613
Ecad MO C-C	Clone- Clone	h7b5	13.346	715.93	120.242	2955.826	21.613
Ecad MO C-C	Clone- Clone	h7b5	13.346	533.063	84.271	1851.177	21.613
Ecad MO C-C	Clone- Clone	h7b5	13.346	419.029	104.379	3376.024	21.613
Ecad MO C-C	Clone- Clone	h7b5	13.346	421.778	68.285	3906.476	21.613
Ecad MO C-C	Clone- Clone
Ecad MO C-C	Clone- Clone	h7b6	16.48	1387.352	166.472	4095	26.709
Ecad MO C-C	Clone- Clone	h7b6	16.48	1084.04	258.536	3368.607	26.709
Ecad MO C-C	Clone- Clone	h7b6	16.48	709.17	149.92	2494.864	26.709
Ecad MO C-C	Clone- Clone	h7b6	16.48	607.492	103.636	2082.61	26.709
Ecad MO C-C	Clone- Clone	h7b6	16.48	457.107	69.292	1853.881	26.709
Ecad MO C-C	Clone- Clone
Ecad MO C-C	Clone- Clone	h7b7	15.616	1423.717	208.604	4095	25.303
Ecad MO C-C	Clone- Clone	h7b7	15.616	949.344	222.76	3615.478	25.303
Ecad MO C-C	Clone- Clone	h7b7	13.995	1181.552	168.474	4095	22.667
Ecad MO C-C	Clone- Clone	h7b7	13.995	1057.235	137.244	4095	22.667
Ecad MO C-C	Clone- Clone	h7b7	13.995	743.588	115.564	2862.032	22.667
Ecad MO C-C	Clone- Clone	h7b7	13.995	494.862	104.71	1693.075	22.667
Ecad MO C-C	Clone- Clone	h7b7	13.995	296.704	38.444	968.625	22.667
Ecad MO C-C	Clone- Clone	h7b7	13.995	279.571	46.506	1257.537	22.667
Ecad MO N-C	Non Clone- Clone	h1b1	16.264	807.257	116.743	3869.395	26.356
Ecad MO N-C	Non Clone- Clone	h1b1	16.264	755.077	96.809	3935.054	26.356
Ecad MO N-C	Non Clone- Clone	h1b1	16.697	611.894	59.642	3821.711	27.059
Ecad MO N-C	Non Clone- Clone	h1b1	16.697	485.595	46.234	2182.309	27.059
Ecad MO N-C	Non Clone- Clone	h1b1	16.697	356.562	28.851	2011.747	27.059
Ecad MO N-C	Non Clone- Clone	h1b1	16.697	304.718	29.961	1628.546	27.059
Ecad MO N-C	Non Clone- Clone	h1b1	16.697	237.044	16.497	1638.164	27.059
Ecad MO N-C	Non Clone- Clone	h1b1	16.697	184.371	27.621	1288.294	27.059
Ecad MO N-C	Non Clone- Clone
Ecad MO N-C	Non Clone- Clone	h1b2	8.862	881.916	170.398	3537.66	14.321
Ecad MO N-C	Non Clone- Clone	h1b2	8.7	891.382	130.355	4095	14.057
Ecad MO N-C	Non Clone- Clone	h1b2	8.7	750.766	50.277	3770.81	14.057
Ecad MO N-C	Non Clone- Clone	h1b2	8.7	631.811	35.773	3757.036	14.057
Ecad MO N-C	Non Clone- Clone	h1b2	8.7	511.234	48.878	2824.132	14.057
Ecad MO N-C	Non Clone- Clone	h1b2	8.7	389.078	21.128	1799.453	14.057
Ecad MO N-C	Non Clone- Clone	h1b2	8.7	302.658	9.836	1693.138	14.057
Ecad MO N-C	Non Clone- Clone	h1b2	8.7	250.109	2.015	1334.233	14.057
Ecad MO N-C	Non Clone- Clone
Ecad MO N-C	Non Clone- Clone	h1b3	11.185	764.618	61.792	3430.214	18.098
Ecad MO N-C	Non Clone- Clone	h1b3	11.185	626.752	90.186	2004.81	18.098
Ecad MO N-C	Non Clone- Clone	h1b3	11.185	411.191	61.634	1285.107	18.098
Ecad MO N-C	Non Clone- Clone	h1b3	11.185	309.166	38.937	1171.797	18.098
Ecad MO N-C	Non Clone- Clone	h1b3	11.185	220.63	29.69	645.211	18.098
Ecad MO N-C	Non Clone- Clone	h1b3	11.185	179.932	11.523	721.141	18.098
Ecad MO N-C	Non Clone- Clone
Ecad MO N-C	Non Clone- Clone	h1b4	7.781	451.439	63.474	2118.354	12.564
Ecad MO N-C	Non Clone- Clone	h1b4	7.781	367.859	24.07	2230.62	12.564
Ecad MO N-C	Non Clone- Clone	h1b4	7.781	311.679	26.242	1890.464	12.564
Ecad MO N-C	Non Clone- Clone	h1b4	7.781	268.47	7.635	1200.955	12.564
Ecad MO N-C	Non Clone- Clone	h1b4	7.781	222.455	30.533	1732.864	12.564
Ecad MO N-C	Non Clone- Clone	h1b4	7.781	177.365	25.926	1004.923	12.564
Ecad MO N-C	Non Clone- Clone
Ecad MO N-C	Non Clone- Clone	h1b5	9.24	655.083	20.514	3308.097	14.936
Ecad MO N-C	Non Clone- Clone	h1b5	9.24	645.756	64.694	3102.619	14.936
Ecad MO N-C	Non Clone- Clone	h1b5	9.24	610.262	42.196	2693.172	14.936
Ecad MO N-C	Non Clone- Clone	h1b5	11.509	642.688	51.204	2595.886	18.626
Ecad MO N-C	Non Clone- Clone	h1b5	11.509	560.613	58.347	2005.688	18.626
Ecad MO N-C	Non Clone- Clone	h1b5	11.509	449.25	42.876	1534.146	18.626
Ecad MO N-C	Non Clone- Clone	h1b5	11.509	357.973	40.861	1738.15	18.626
Ecad MO N-C	Non Clone- Clone	h1b5	11.509	267.691	42.858	1455.567	18.626
Ecad MO N-C	Non Clone- Clone
Ecad MO N-C	Non Clone- Clone	h1b6	9.402	379.717	33.051	1547.153	15.187
Ecad MO N-C	Non Clone- Clone	h1b6	9.402	318.806	19.284	1415.478	15.187
Ecad MO N-C	Non Clone- Clone	h1b6	9.402	245.352	19.917	1596.49	15.187
Ecad MO N-C	Non Clone- Clone	h1b6	9.402	239.626	23.262	2259.197	15.187
Ecad MO N-C	Non Clone- Clone	h1b6	9.402	210.212	2.868	1500.051	15.187
Ecad MO N-C	Non Clone- Clone
Ecad MO N-C	Non Clone- Clone	h1b7	8.808	586.576	44.944	2654.341	14.233
Ecad MO N-C	Non Clone- Clone	h1b7	8.808	468.39	87.304	2664.239	14.233
Ecad MO N-C	Non Clone- Clone	h1b7	8.808	349.21	9.969	2455.481	14.233
Ecad MO N-C	Non Clone- Clone	h1b7	8.808	276.771	14.418	1396.031	14.233
Ecad MO N-C	Non Clone- Clone	h1b7	8.808	213.543	16.355	995.968	14.233
Ecad MO N-C	Non Clone- Clone
Ecad MO N-C	Non Clone- Clone	h1b8	9.618	803.342	144.564	2823.68	15.477
Ecad MO N-C	Non Clone- Clone	h1b8	9.618	795.496	163.781	2844.135	15.477
Ecad MO N-C	Non Clone- Clone	h1b8	9.618	692.811	89.514	3251.815	15.477
Ecad MO N-C	Non Clone- Clone	h1b8	9.618	632.119	105.673	2683.929	15.477
Ecad MO N-C	Non Clone- Clone	h1b8	9.618	546.658	83.031	2499.651	15.477
Ecad MO N-C	Non Clone- Clone	h1b8	9.618	440.544	76.548	2569.904	15.477
Ecad MO N-C	Non Clone- Clone	h1b8	9.618	349.054	33.549	1596.53	15.477
Ecad MO N-C	Non Clone- Clone	h1b8	9.618	314.024	33.157	1082.797	15.477
Ecad MO N-C	Non Clone- Clone	h1b8	9.618	287.269	20.936	971.406	15.477
Ecad MO N-C	Non Clone- Clone	h1b8	9.618	244.395	18.812	783.413	15.477
Ecad MO N-C	Non Clone- Clone
Ecad MO N-C	Non Clone- Clone	h1b9	9.078	535.268	55.264	2260.705	14.672
Ecad MO N-C	Non Clone- Clone	h1b9	9.078	580.506	42.809	3001.652	14.672
Ecad MO N-C	Non Clone- Clone	h1b9	9.078	626.054	81.05	3057.385	14.672
Ecad MO N-C	Non Clone- Clone	h1b9	9.078	637.411	58.519	2872.738	14.672
Ecad MO N-C	Non Clone- Clone	h1b9	9.078	551.137	73.675	3786.299	14.672
Ecad MO N-C	Non Clone- Clone	h1b9	9.078	430.994	48.351	2169.548	14.672
Ecad MO N-C	Non Clone- Clone	h1b9	9.078	362.927	25.272	1247.079	14.672
Ecad MO N-C	Non Clone- Clone	h1b9	9.078	280.838	22.056	1575.263	14.672
Ecad MO N-C	Non Clone- Clone	h2b1	9.726	1241.066	268.614	4035.684	15.689
Ecad MO N-C	Non Clone- Clone	h2b1	9.726	973.663	218.402	2745.316	15.689
Ecad MO N-C	Non Clone- Clone	h2b1	9.726	650.952	125.523	2459.555	15.689
Ecad MO N-C	Non Clone- Clone	h2b1	9.726	467.868	98.369	2383.904	15.689
Ecad MO N-C	Non Clone- Clone	h2b1	9.726	489.74	51.335	2691.918	15.689
Ecad MO N-C	Non Clone- Clone
Ecad MO N-C	Non Clone- Clone	h2b2	9.294	937.783	122.521	3372.335	15.024
Ecad MO N-C	Non Clone- Clone	h2b2	9.294	771.347	112.157	3512.677	15.024
Ecad MO N-C	Non Clone- Clone	h2b2	9.294	598.968	116.723	2948.031	15.024
Ecad MO N-C	Non Clone- Clone	h2b2	9.294	463.045	90.59	2162.327	15.024
Ecad MO N-C	Non Clone- Clone	h2b2	9.294	462.07	99.787	2263.444	15.024
Ecad MO N-C	Non Clone- Clone	h2b2	9.294	660.005	72.653	4092.411	15.024
Ecad MO N-C	Non Clone- Clone	h2b2	9.294	703.127	85.008	2220.698	15.024
Ecad MO N-C	Non Clone- Clone
Ecad MO N-C	Non Clone- Clone	h2b3	6.916	877.256	114.085	2940.733	11.158
Ecad MO N-C	Non Clone- Clone	h2b3	6.916	751.486	126.132	4081.024	11.158
Ecad MO N-C	Non Clone- Clone	h2b3	6.916	506.825	119.681	3061.582	11.158
Ecad MO N-C	Non Clone- Clone	h2b3	6.916	329.416	54.887	1828.014	11.158
Ecad MO N-C	Non Clone- Clone	h2b3	6.916	326.782	50.458	1764.043	11.158
Ecad MO N-C	Non Clone- Clone
Ecad MO N-C	Non Clone- Clone	h2b4	3.404	905.699	157.729	3617.986	5.447
Ecad MO N-C	Non Clone- Clone	h2b4	3.404	637.889	150.57	1480.276	5.447
Ecad MO N-C	Non Clone- Clone	h2b4	3.404	428.921	168.627	1237.269	5.447
Ecad MO N-C	Non Clone- Clone	h2b4	3.404	393.327	100.563	1375.035	5.447
Ecad MO N-C	Non Clone- Clone	h2b4	3.404	448.836	96.887	1838.58	5.447
Ecad MO N-C	Non Clone- Clone
Ecad MO N-C	Non Clone- Clone	h2b5	10.429	931.513	146.027	3873.867	16.869
Ecad MO N-C	Non Clone- Clone	h2b5	10.429	764.285	176.834	2048.177	16.869
Ecad MO N-C	Non Clone- Clone	h2b5	10.429	554.421	142.148	1618.783	16.869
Ecad MO N-C	Non Clone- Clone	h2b5	10.429	429.907	98.596	1570.149	16.869
Ecad MO N-C	Non Clone- Clone	h2b5	10.429	367.771	69.468	1970.083	16.869
Ecad MO N-C	Non Clone- Clone	h2b5	10.429	403.367	25.039	2481.586	16.869
Ecad MO N-C	Non Clone- Clone
Ecad MO N-C	Non Clone- Clone	h2b6	6.862	885.685	182.474	3950.674	11.07
Ecad MO N-C	Non Clone- Clone	h2b6	6.862	820.02	168.777	2760.146	11.07
Ecad MO N-C	Non Clone- Clone	h2b6	6.862	609.597	120.698	1771.598	11.07
Ecad MO N-C	Non Clone- Clone	h2b6	6.862	370.54	86.03	2410.018	11.07
Ecad MO N-C	Non Clone- Clone	h2b6	6.862	305.34	51.11	3441.041	11.07
Ecad MO N-C	Non Clone- Clone
Ecad MO N-C	Non Clone- Clone	h2b7	6.268	1242.177	302.443	3484.343	10.104
Ecad MO N-C	Non Clone- Clone	h2b7	6.268	1117.851	357.07	4095	10.104
Ecad MO N-C	Non Clone- Clone	h2b7	6.268	942.137	280.515	3264.546	10.104
Ecad MO N-C	Non Clone- Clone	h2b7	6.268	656.064	184.141	2269.57	10.104
Ecad MO N-C	Non Clone- Clone	h2b7	6.268	395.873	114.777	2543.56	10.104
Ecad MO N-C	Non Clone- Clone	h2b7	6.268	344.685	49.973	2220.945	10.104
Ecad MO N-C	Non Clone- Clone
Ecad MO N-C	Non Clone- Clone	h2b8	5.674	1357.923	328.792	4025.826	9.137
Ecad MO N-C	Non Clone- Clone	h2b8	5.674	1289.945	334.424	3838.679	9.137
Ecad MO N-C	Non Clone- Clone	h2b8	5.674	1021.766	338.576	3021.859	9.137
Ecad MO N-C	Non Clone- Clone	h2b8	5.674	669.288	260.792	1722.624	9.137
Ecad MO N-C	Non Clone- Clone	h2b8	5.674	515.486	150.571	2619.306	9.137
Ecad MO N-C	Non Clone- Clone	h2b8	5.674	476.666	134.654	1568.02	9.137
Ecad MO N-C	Non Clone- Clone
Ecad MO N-C	Non Clone- Clone	h2b9	6.052	1077.042	258.477	4095	9.752
Ecad MO N-C	Non Clone- Clone	h2b9	6.052	856.051	202.595	3467.944	9.752
Ecad MO N-C	Non Clone- Clone	h2b9	6.052	548.405	176.256	1725.604	9.752
Ecad MO N-C	Non Clone- Clone	h2b9	6.052	460.262	35.917	3300.331	9.752
Ecad MO N-C	Non Clone- Clone	h2b9	6.052	409.443	32.948	3505.095	9.752
Ecad MO N-C	Non Clone- Clone
Ecad MO N-C	Non Clone- Clone	h2b10	6.052	856.051	202.595	3467.944	9.752
Ecad MO N-C	Non Clone- Clone	h2b10	6.052	548.405	176.256	1725.604	9.752
Ecad MO N-C	Non Clone- Clone	h2b10	6.052	460.262	35.917	3300.331	9.752
Ecad MO N-C	Non Clone- Clone	h2b10	6.052	409.443	32.948	3505.095	9.752
Ecad MO N-C	Non Clone- Clone
Ecad MO N-C	Non Clone- Clone	h2b11	8.483	1301.144	200.027	3968.552	13.706
Ecad MO N-C	Non Clone- Clone	h2b11	8.483	1122.967	195.135	3981.961	13.706
Ecad MO N-C	Non Clone- Clone	h2b11	8.483	767.874	150.453	2618.509	13.706
Ecad MO N-C	Non Clone- Clone	h2b11	8.483	449.79	85.687	1814.53	13.706
Ecad MO N-C	Non Clone- Clone	h2b11	8.483	233.339	54.756	1494.158	13.706
Ecad MO N-C	Non Clone- Clone	h2b11	8.483	177.856	6.686	1325.706	13.706
Ecad MO N-C	Non Clone- Clone
Ecad MO N-C	Non Clone- Clone	h2b12	10.969	595.966	50.034	3191.539	17.747
Ecad MO N-C	Non Clone- Clone	h2b12	10.969	527.579	86.257	2948.961	17.747
Ecad MO N-C	Non Clone- Clone	h2b12	10.969	453.287	72.774	2469.468	17.747
Ecad MO N-C	Non Clone- Clone	h2b12	10.969	346.724	36.245	2174.471	17.747
Ecad MO N-C	Non Clone- Clone	h2b12	10.969	270.079	42.088	1448.301	17.747
Ecad MO N-C	Non Clone- Clone	h2b12	10.969	257.627	17.5	1577.917	17.747
Ecad MO N-C	Non Clone- Clone
Ecad MO N-C	Non Clone- Clone	h2b13	10.104	1398.52	117.667	4095	16.342
Ecad MO N-C	Non Clone- Clone	h2b13	10.104	1204.854	106.676	3988.006	16.342
Ecad MO N-C	Non Clone- Clone	h2b13	10.104	789.367	58.705	3307.979	16.342
Ecad MO N-C	Non Clone- Clone	h2b13	10.104	621.892	112.783	3183.601	16.342
Ecad MO N-C	Non Clone- Clone	h2b13	10.104	461.608	73.202	2272.992	16.342
Ecad MO N-C	Non Clone- Clone	h2b13	10.104	347.444	73.17	1401.375	16.342
Ecad MO N-C	Non Clone- Clone
Ecad MO N-C	Non Clone- Clone	h2b14	10.05	1027.065	158.858	4089.359	16.254
Ecad MO N-C	Non Clone- Clone	h2b14	10.05	883.82	193.784	3232.969	16.254
Ecad MO N-C	Non Clone- Clone	h2b14	10.05	673.689	136.289	2821.448	16.254
Ecad MO N-C	Non Clone- Clone	h2b14	10.05	448.131	45.217	1492.029	16.254
Ecad MO N-C	Non Clone- Clone	h2b14	10.05	385.709	19.082	3564.904	16.254
Ecad MO N-C	Non Clone- Clone	h2b14	10.05	422.259	25.144	2689.861	16.254
Ecad MO N-C	Non Clone- Clone
Ecad MO N-C	Non Clone- Clone	h2b15	3.674	1034.47	202.943	3642.359	5.887
Ecad MO N-C	Non Clone- Clone	h2b15	3.674	944.999	241.53	4074.032	5.887
Ecad MO N-C	Non Clone- Clone	h2b15	3.674	631.707	189.112	2302.009	5.887
Ecad MO N-C	Non Clone- Clone	h2b15	3.674	397.451	74.837	1343.237	5.887
Ecad MO N-C	Non Clone- Clone	h2b15	3.674	407.771	42.938	1958.289	5.887
Ecad MO N-C	Non Clone- Clone
Ecad MO N-C	Non Clone- Clone	h2b16	5.836	1148.602	359.278	3023.493	9.401
Ecad MO N-C	Non Clone- Clone	h2b16	5.836	995.635	233.496	3081.312	9.401
Ecad MO N-C	Non Clone- Clone	h2b16	5.836	784.46	209.13	2744.358	9.401
Ecad MO N-C	Non Clone- Clone	h2b16	5.836	562.09	154.862	1722.542	9.401
Ecad MO N-C	Non Clone- Clone	h2b16	5.836	459.722	178.398	2220.851	9.401
Ecad MO N-C	Non Clone- Clone	h2b16	5.836	486.522	171.143	1515.849	9.401
Ecad MO N-C	Non Clone- Clone	h3b1	10.969	784.44	104.053	4082.289	17.747
Ecad MO N-C	Non Clone- Clone	h3b1	10.969	656.582	45.437	3593.565	17.747
Ecad MO N-C	Non Clone- Clone	h3b1	10.969	489.562	55.397	3370.288	17.747
Ecad MO N-C	Non Clone- Clone	h3b1	10.969	356.847	15.405	3710.031	17.747
Ecad MO N-C	Non Clone- Clone	h3b1	10.969	250.234	16.455	1433.239	17.747
Ecad MO N-C	Non Clone- Clone	h3b1	10.969	228.366	3.175	899.769	17.747
Ecad MO N-C	Non Clone- Clone
Ecad MO N-C	Non Clone- Clone	h3b2	9.888	805.632	197.874	3973.61	15.99
Ecad MO N-C	Non Clone- Clone	h3b2	9.888	959.592	249.184	3869.562	15.99
Ecad MO N-C	Non Clone- Clone	h3b2	9.888	977.515	251.412	2934.839	15.99
Ecad MO N-C	Non Clone- Clone	h3b2	9.888	893.163	197.568	3853.13	15.99
Ecad MO N-C	Non Clone- Clone	h3b2	9.888	558.309	88.912	2579.908	15.99
Ecad MO N-C	Non Clone- Clone	h3b2	9.888	293.743	71.522	1185.53	15.99
Ecad MO N-C	Non Clone- Clone	h3b2	9.888	241.714	45.476	1060.161	15.99
Ecad MO N-C	Non Clone- Clone
Ecad MO N-C	Non Clone- Clone	h3b3	9.564	1085.016	180.167	3337.09	15.463
Ecad MO N-C	Non Clone- Clone	h3b3	9.564	800.43	179.273	2594.832	15.463
Ecad MO N-C	Non Clone- Clone	h3b3	9.564	512.427	135.322	2697.132	15.463
Ecad MO N-C	Non Clone- Clone	h3b3	9.564	435.483	118.777	2308.769	15.463
Ecad MO N-C	Non Clone- Clone	h3b3	9.564	376.006	41.996	1782.503	15.463
Ecad MO N-C	Non Clone- Clone	h3b3	9.564	221.398	14.211	783.844	15.463
Ecad MO N-C	Non Clone- Clone
Ecad MO N-C	Non Clone- Clone	h3b4	6.646	1145.504	315.75	3943.815	10.719
Ecad MO N-C	Non Clone- Clone	h3b4	6.646	963.099	185.403	3022.908	10.719
Ecad MO N-C	Non Clone- Clone	h3b4	6.646	757.906	193.824	2956.062	10.719
Ecad MO N-C	Non Clone- Clone	h3b4	6.646	459.986	154.312	1454.043	10.719
Ecad MO N-C	Non Clone- Clone	h3b4	6.646	361.328	59.028	941.407	10.719
Ecad MO N-C	Non Clone- Clone
Ecad MO N-C	Non Clone- Clone	h3b5	7.457	958.475	255.032	3480.946	12.037
Ecad MO N-C	Non Clone- Clone	h3b5	7.457	718.473	152.784	4095	12.037
Ecad MO N-C	Non Clone- Clone	h3b5	7.457	579.533	105.072	3330.353	12.037
Ecad MO N-C	Non Clone- Clone	h3b5	7.457	454.702	83.083	1096.779	12.037
Ecad MO N-C	Non Clone- Clone	h3b5	7.457	335.708	26.567	1015.993	12.037
Ecad MO N-C	Non Clone- Clone	h3b5	7.457	239.143	3.443	847.015	12.037
Ecad MO N-C	Non Clone- Clone
Ecad MO N-C	Non Clone- Clone	h3b6	5.133	686.488	170.211	2377.132	8.259
Ecad MO N-C	Non Clone- Clone	h3b6	5.133	614.976	112.323	1980.357	8.259
Ecad MO N-C	Non Clone- Clone	h3b6	5.133	488.348	71.52	2120.378	8.259
Ecad MO N-C	Non Clone- Clone	h3b6	5.133	371.523	58.869	1481.879	8.259
Ecad MO N-C	Non Clone- Clone	h3b6	5.133	331.016	69.007	1199.476	8.259
Ecad MO N-C	Non Clone- Clone	h3b6	5.133	331.111	95.758	774.371	8.259
Ecad MO N-C	Non Clone- Clone
Ecad MO N-C	Non Clone- Clone	h3b7	6.376	1065.589	284.983	2332.498	10.279
Ecad MO N-C	Non Clone- Clone	h3b7	6.376	1011.888	328.871	2666.243	10.279
Ecad MO N-C	Non Clone- Clone	h3b7	6.376	835.983	219.391	3112.16	10.279
Ecad MO N-C	Non Clone- Clone	h3b7	6.376	683.154	43.328	2462.796	10.279
Ecad MO N-C	Non Clone- Clone	h3b7	6.376	572.58	62.799	2116.764	10.279
Ecad MO N-C	Non Clone- Clone	h3b7	6.376	406.663	40.436	1409.798	10.279
Ecad MO N-C	Non Clone- Clone
Ecad MO N-C	Non Clone- Clone	h3b8	9.078	1087.411	232.826	4095	14.672
Ecad MO N-C	Non Clone- Clone	h3b8	9.078	1006.753	165.224	3412.039	14.672
Ecad MO N-C	Non Clone- Clone	h3b8	9.078	954.613	172.079	2631.892	14.672
Ecad MO N-C	Non Clone- Clone	h3b8	9.078	912.987	118.074	3202.13	14.672
Ecad MO N-C	Non Clone- Clone	h3b8	9.078	762.698	101.029	2922.608	14.672
Ecad MO N-C	Non Clone- Clone	h3b8	9.078	525.025	68.321	2854.797	14.672
Ecad MO N-C	Non Clone- Clone	h3b8	9.078	408.61	53.685	2135.609	14.672
Ecad MO N-C	Non Clone- Clone
Ecad MO N-C	Non Clone- Clone	h3b9	4.755	1283.859	438.56	3225.393	7.644
Ecad MO N-C	Non Clone- Clone	h3b9	4.755	1028.054	300.966	2420.853	7.644
Ecad MO N-C	Non Clone- Clone	h3b9	4.755	787.054	211.216	1487.326	7.644
Ecad MO N-C	Non Clone- Clone	h3b9	4.755	535.194	182.361	1129.633	7.644
Ecad MO N-C	Non Clone- Clone	h3b9	4.755	380.003	113.359	1477.345	7.644
Ecad MO N-C	Non Clone- Clone	h3b9	4.755	250.99	44.792	1621.36	7.644
Ecad MO N-C	Non Clone- Clone
Ecad MO N-C	Non Clone- Clone
Ecad MO N-C	Non Clone- Clone	h3b10	4.431	1260.806	277.563	3698.048	7.117
Ecad MO N-C	Non Clone- Clone	h3b10	4.431	918.742	311.6	1888.817	7.117
Ecad MO N-C	Non Clone- Clone	h3b10	4.431	737.452	252.782	1768.949	7.117
Ecad MO N-C	Non Clone- Clone	h3b10	4.431	538.249	119.049	1433.036	7.117
Ecad MO N-C	Non Clone- Clone	h3b10	4.431	428.329	150.79	998.046	7.117
Ecad MO N-C	Non Clone- Clone	h3b10	4.431	343.891	53.197	1089.78	7.117
Ecad MO N-C	Non Clone- Clone
Ecad MO N-C	Non Clone- Clone	h3b11	9.348	1146.121	204.978	3729.031	15.112
Ecad MO N-C	Non Clone- Clone	h3b11	9.348	1150.847	177.582	3696.573	15.112
Ecad MO N-C	Non Clone- Clone	h3b11	9.348	1019.316	203.183	2934.061	15.112
Ecad MO N-C	Non Clone- Clone	h3b11	9.348	792.455	123.399	3260.394	15.112
Ecad MO N-C	Non Clone- Clone	h3b11	9.348	560.221	70.435	3085.846	15.112
Ecad MO N-C	Non Clone- Clone	h3b11	9.348	405.19	96.705	1211.25	15.112
Ecad MO N-C	Non Clone- Clone	h3b11	9.348	356.375	79.084	1202.334	15.112
Ecad MO N-C	Non Clone- Clone
Ecad MO N-C	Non Clone- Clone	h3b12	8.051	1728.902	367.677	4095	13.003
Ecad MO N-C	Non Clone- Clone	h3b12	8.051	1758.534	508.156	4066.843	13.003
Ecad MO N-C	Non Clone- Clone	h3b12	8.051	1645.502	384.233	3680.63	13.003
Ecad MO N-C	Non Clone- Clone	h3b12	8.051	1033.456	232.903	2733.426	13.003
Ecad MO N-C	Non Clone- Clone	h3b12	8.051	462.016	116.596	1766.531	13.003
Ecad MO N-C	Non Clone- Clone	h3b12	8.051	335.507	82.738	932.913	13.003
Ecad MO N-C	Non Clone- Clone
Ecad MO N-C	Non Clone- Clone	h3b13	7.889	1503.204	317.489	4095	12.74
Ecad MO N-C	Non Clone- Clone	h3b13	7.889	1631.875	456.667	4093.602	12.74
Ecad MO N-C	Non Clone- Clone	h3b13	7.889	1608.068	544.497	3930.927	12.74
Ecad MO N-C	Non Clone- Clone	h3b13	7.889	1004.308	327.795	3094.887	12.74
Ecad MO N-C	Non Clone- Clone	h3b13	7.889	513.063	127.172	3190.826	12.74
Ecad MO N-C	Non Clone- Clone	h3b13	7.889	440.966	95.241	2923.331	12.74
Ecad MO N-C	Non Clone- Clone
Ecad MO N-C	Non Clone- Clone	h3b14	11.023	1698.94	452.324	4095	17.835
Ecad MO N-C	Non Clone- Clone	h3b14	11.023	1630.034	520.944	4092.591	17.835
Ecad MO N-C	Non Clone- Clone	h3b14	11.023	1587.949	462.155	4095	17.835
Ecad MO N-C	Non Clone- Clone	h3b14	11.023	1417.662	331.329	4095	17.835
Ecad MO N-C	Non Clone- Clone	h3b14	11.023	860.139	164.317	3356.786	17.835
Ecad MO N-C	Non Clone- Clone	h3b14	11.023	463.235	47.73	1735.885	17.835
Ecad MO N-C	Non Clone- Clone	h3b14	11.023	368.689	32.076	1147.994	17.835
Ecad MO N-C	Non Clone- Clone
Ecad MO N-C	Non Clone- Clone	h3b15	8.537	1024.216	94.495	4095	13.794
Ecad MO N-C	Non Clone- Clone	h3b15	8.537	882.368	93.38	4019.538	13.794
Ecad MO N-C	Non Clone- Clone	h3b15	8.537	668.192	79.349	4084.634	13.794
Ecad MO N-C	Non Clone- Clone	h3b15	8.537	445.551	63.578	2399.502	13.794
Ecad MO N-C	Non Clone- Clone	h3b15	8.537	352.852	35.681	1998.503	13.794
Ecad MO N-C	Non Clone- Clone	h3b15	8.537	313.725	29.381	1498.667	13.794
Ecad MO N-C	Non Clone- Clone
Ecad MO N-C	Non Clone- Clone	h3b16	9.24	1246.238	229.213	4095	14.936
Ecad MO N-C	Non Clone- Clone	h3b16	9.24	1278.098	193.13	4086.405	14.936
Ecad MO N-C	Non Clone- Clone	h3b16	9.24	873.925	137.644	3583.168	14.936
Ecad MO N-C	Non Clone- Clone	h3b16	9.24	499.322	101.86	1815.941	14.936
Ecad MO N-C	Non Clone- Clone	h3b16	9.24	418.174	79.283	1594.83	14.936
Ecad MO N-C	Non Clone- Clone	h3b16	9.24	360.941	48.925	1324.002	14.936
Ecad MO N-C	Non Clone- Clone	h3b16	9.24	360.941	48.925	1324.002	14.936
Ecad MO N-C	Non Clone- Clone
Ecad MO N-C	Non Clone- Clone	h3b17	8.267	1019.003	304.408	2978.602	13.353
Ecad MO N-C	Non Clone- Clone	h3b17	8.267	998.353	207.49	3804.416	13.353
Ecad MO N-C	Non Clone- Clone	h3b17	8.267	866.639	177.149	3203.462	13.353
Ecad MO N-C	Non Clone- Clone	h3b17	8.267	622.465	158.278	2427.446	13.353
Ecad MO N-C	Non Clone- Clone	h3b17	8.267	450.146	69.172	1892.265	13.353
Ecad MO N-C	Non Clone- Clone	h3b17	8.267	392.193	49.882	1544.932	13.353
Ecad MO N-C	Non Clone- Clone
Ecad MO N-C	Non Clone- Clone	h3b18	4.431	916.452	306.223	2941.305	7.117
Ecad MO N-C	Non Clone- Clone	h3b18	4.431	857.579	213.591	3421.447	7.117
Ecad MO N-C	Non Clone- Clone	h3b18	4.431	680.699	164.024	2753.19	7.117
Ecad MO N-C	Non Clone- Clone	h3b18	4.431	492.114	74.368	1491.31	7.117
Ecad MO N-C	Non Clone- Clone	h3b18	4.431	441.305	73.723	1286.783	7.117
Ecad MO N-C	Non Clone- Clone
Ecad MO N-C	Non Clone- Clone	h3b19	6.538	1253.914	336.918	2692.494	10.543
Ecad MO N-C	Non Clone- Clone	h3b19	6.538	810.817	155.023	2340.972	10.543
Ecad MO N-C	Non Clone- Clone	h3b19	6.538	566.176	109.96	2481.603	10.543
Ecad MO N-C	Non Clone- Clone	h3b19	6.538	486.425	89.141	2115.347	10.543
Ecad MO N-C	Non Clone- Clone	h3b19	6.538	408.453	64.252	1931.969	10.543
Ecad MO N-C	Non Clone- Clone	h3b19	6.538	386.52	43.129	3094.193	10.543
Ecad MO N-C	Non Clone- Clone
Ecad MO N-C	Non Clone- Clone	h3b20	13.292	1062.998	193.466	4095	21.525
Ecad MO N-C	Non Clone- Clone	h3b20	13.292	975.068	155.81	4095	21.525
Ecad MO N-C	Non Clone- Clone	h3b20	13.292	873.757	148.611	4084.223	21.525
Ecad MO N-C	Non Clone- Clone	h3b20	13.292	729.121	59.218	2879.603	21.525
Ecad MO N-C	Non Clone- Clone	h3b20	13.292	509.062	26.324	2635.093	21.525
Ecad MO N-C	Non Clone- Clone	h3b20	13.292	336.013	16.788	2687.17	21.525
Ecad MO N-C	Non Clone- Clone	h3b20	13.292	274.07	4.639	1684.967	21.525
Ecad MO N-C	Non Clone- Clone
Ecad MO N-C	Non Clone- Clone	h3b21	6.43	1329.283	336.314	4004.443	10.367
Ecad MO N-C	Non Clone- Clone	h3b21	6.43	1159.718	308.923	3730.064	10.367
Ecad MO N-C	Non Clone- Clone	h3b21	6.43	936.065	250.831	2427.711	10.367
Ecad MO N-C	Non Clone- Clone	h3b21	6.43	577.044	108.544	2055.025	10.367
Ecad MO N-C	Non Clone- Clone	h3b21	6.43	241.405	59.039	564.757	10.367
Ecad MO N-C	Non Clone- Clone	h3b21	6.43	194.953	9.117	504.359	10.367
Ecad MO N-C	Non Clone- Clone	h3b21	6.43	158.087	18.477	483.692	10.367
Ecad MO N-C	Non Clone- Clone
Ecad MO N-C	Non Clone- Clone	h3b22	14.643	1052.946	302.507	3757.676	23.721
Ecad MO N-C	Non Clone- Clone	h3b22	14.643	823.961	84.855	3307.649	23.721
Ecad MO N-C	Non Clone- Clone	h3b22	14.643	519.223	46.231	2622.403	23.721
Ecad MO N-C	Non Clone- Clone	h3b22	14.643	425.105	39.865	1499.855	23.721
Ecad MO N-C	Non Clone- Clone	h3b22	14.643	339.344	30.78	1390.464	23.721
Ecad MO N-C	Non Clone- Clone	h3b22	14.643	306.484	11.078	2453.426	23.721
Ecad MO N-C	Non Clone- Clone	h3b22	14.643	248.474	15.612	2027.405	23.721
Ecad MO N-C	Non Clone- Clone	h4b1	14.805	966.304	79.732	4095	23.985
Ecad MO N-C	Non Clone- Clone	h4b1	14.805	912.107	89.303	3789.022	23.985
Ecad MO N-C	Non Clone- Clone	h4b1	14.805	688.744	36.649	3243.573	23.985
Ecad MO N-C	Non Clone- Clone	h4b1	14.805	521.397	75.238	2574.292	23.985
Ecad MO N-C	Non Clone- Clone	h4b1	14.805	374.333	23.908	1436.844	23.985
Ecad MO N-C	Non Clone- Clone
Ecad MO N-C	Non Clone- Clone	h4b2	7.457	1365.338	307.073	3566.898	12.037
Ecad MO N-C	Non Clone- Clone	h4b2	7.457	1274.278	304.498	3392.361	12.037
Ecad MO N-C	Non Clone- Clone	h4b2	7.457	798.014	153.673	2504.782	12.037
Ecad MO N-C	Non Clone- Clone	h4b2	7.457	543.989	121.499	2263.173	12.037
Ecad MO N-C	Non Clone- Clone	h4b2	7.457	407.38	84.789	1615.352	12.037
Ecad MO N-C	Non Clone- Clone
Ecad MO N-C	Non Clone- Clone	h4b3	10.212	1048.742	130.907	4095	16.517
Ecad MO N-C	Non Clone- Clone	h4b3	10.212	897.85	194.093	4095	16.517
Ecad MO N-C	Non Clone- Clone	h4b3	10.212	552.398	77.868	3253.05	16.517
Ecad MO N-C	Non Clone- Clone	h4b3	10.212	432.946	65.386	4084.617	16.517
Ecad MO N-C	Non Clone- Clone	h4b3	10.212	385.752	41.443	4095	16.517
Ecad MO N-C	Non Clone- Clone
Ecad MO N-C	Non Clone- Clone	h4b4	4.161	1107.027	333.889	3100.616	6.677
Ecad MO N-C	Non Clone- Clone	h4b4	4.161	1162.028	283.847	3749.521	6.677
Ecad MO N-C	Non Clone- Clone	h4b4	4.161	734.13	183.804	1912.838	6.677
Ecad MO N-C	Non Clone- Clone	h4b4	4.161	586.1	137.083	2978.872	6.677
Ecad MO N-C	Non Clone- Clone
Ecad MO N-C	Non Clone- Clone	h4b5	9.888	1073.885	246.095	2655.635	15.99
Ecad MO N-C	Non Clone- Clone	h4b5	9.888	1036.128	151.568	3905.189	15.99
Ecad MO N-C	Non Clone- Clone	h4b5	9.888	584.742	91.671	2160.046	15.99
Ecad MO N-C	Non Clone- Clone	h4b5	9.888	416.7	40.197	1301.907	15.99
Ecad MO N-C	Non Clone- Clone	h4b5	9.888	374.178	27.108	1567.884	15.99
Ecad MO N-C	Non Clone- Clone
Ecad MO N-C	Non Clone- Clone	h4b6	8.7	776.094	74.755	3236.288	14.056
Ecad MO N-C	Non Clone- Clone	h4b6	8.7	536.918	79.182	2290.987	14.056
Ecad MO N-C	Non Clone- Clone	h4b6	8.7	343.666	69.064	1175.094	14.056
Ecad MO N-C	Non Clone- Clone	h4b6	8.7	266.349	23.602	760.376	14.056
Ecad MO N-C	Non Clone- Clone
Ecad MO N-C	Non Clone- Clone	h4b7	6.592	826.941	180.287	3117.151	10.631
Ecad MO N-C	Non Clone- Clone	h4b7	6.592	488.151	74.363	1800.061	10.631
Ecad MO N-C	Non Clone- Clone	h4b7	6.592	208.146	40.409	804.211	10.631
Ecad MO N-C	Non Clone- Clone	h4b7	6.592	151.221	28.78	509.332	10.631
Ecad MO N-C	Non Clone- Clone	h4b7	6.592	125.124	14.243	379.352	10.631
Ecad MO N-C	Non Clone- Clone
Ecad MO N-C	Non Clone- Clone	h4b8	13.725	858.415	53.445	4076.052	22.228
Ecad MO N-C	Non Clone- Clone	h4b8	13.725	470.174	47.339	2253.632	22.228
Ecad MO N-C	Non Clone- Clone	h4b8	13.725	310.426	19.547	1404.672	22.228
Ecad MO N-C	Non Clone- Clone	h4b8	13.725	254.349	19.447	1517.244	22.228
Ecad MO N-C	Non Clone- Clone	h4b8	13.725	205.219	4.059	1227.44	22.228
Ecad MO N-C	Non Clone- Clone
Ecad MO N-C	Non Clone- Clone	h4b9	4.593	1268.054	172.436	3716.541	7.38
Ecad MO N-C	Non Clone- Clone	h4b9	4.593	1211.073	204.831	3286.845	7.38
Ecad MO N-C	Non Clone- Clone	h4b9	4.593	721.659	263.577	2347.834	7.38
Ecad MO N-C	Non Clone- Clone	h4b9	4.593	488.577	84.611	1620.75	7.38
Ecad MO N-C	Non Clone- Clone	h4b9	4.593	418.91	97.169	1083.793	7.38
Ecad MO N-C	Non Clone- Clone
Ecad MO N-C	Non Clone- Clone	h4b10	15.13	872.385	120.521	3227.788	24.512
Ecad MO N-C	Non Clone- Clone	h4b10	15.13	833.112	121.155	2429.309	24.512
Ecad MO N-C	Non Clone- Clone	h4b10	15.13	675.497	109.299	2031.355	24.512
Ecad MO N-C	Non Clone- Clone	h4b10	15.13	510.942	90.249	1887.063	24.512
Ecad MO N-C	Non Clone- Clone	h4b10	15.13	406.333	78.978	1665.213	24.512
Ecad MO N-C	Non Clone- Clone	h4b10	15.13	311.813	39.242	2868.447	24.512
Ecad MO N-C	Non Clone- Clone
Ecad MO N-C	Non Clone- Clone	h4b11	16.264	815.933	84.73	3885.253	26.357
Ecad MO N-C	Non Clone- Clone	h4b11	16.264	677.724	112.985	2664.197	26.357
Ecad MO N-C	Non Clone- Clone	h4b11	16.264	501.105	56.356	2215.644	26.357
Ecad MO N-C	Non Clone- Clone	h4b11	16.264	376.288	67.149	1671.241	26.357
Ecad MO N-C	Non Clone- Clone	h4b11	16.264	283.969	42.696	2009.049	26.357
Ecad MO N-C	Non Clone- Clone	h4b11	16.264	295.68	22.162	4075.323	26.357
Ecad MO N-C	Non Clone- Clone
Ecad MO N-C	Non Clone- Clone	h4b12	4.593	842.303	122.208	2626.167	7.38
Ecad MO N-C	Non Clone- Clone	h4b12	4.593	583.864	121.989	1397.022	7.38
Ecad MO N-C	Non Clone- Clone	h4b12	4.593	384.647	63.878	1065.526	7.38
Ecad MO N-C	Non Clone- Clone	h4b12	4.593	234.268	54.167	796.362	7.38
Ecad MO N-C	Non Clone- Clone	h4b12	4.593	171.961	33.044	644.819	7.38
Ecad MO N-C	Non Clone- Clone
Ecad MO N-C	Non Clone- Clone	h4b13	5.295	1107.887	197.369	3914.593	8.522
Ecad MO N-C	Non Clone- Clone	h4b13	5.295	1161.099	246.402	4037.196	8.522
Ecad MO N-C	Non Clone- Clone	h4b13	5.295	869.45	164.66	3359.549	8.522
Ecad MO N-C	Non Clone- Clone	h4b13	5.295	620.504	129.94	1981.248	8.522
Ecad MO N-C	Non Clone- Clone	h4b13	5.295	419.202	98.342	1940.892	8.522
Ecad MO N-C	Non Clone- Clone
Ecad MO N-C	Non Clone- Clone	h4b14	9.294	832.74	254.362	2832.158	15.024
Ecad MO N-C	Non Clone- Clone	h4b14	9.294	604.605	167.755	1998.532	15.024
Ecad MO N-C	Non Clone- Clone	h4b14	9.294	536.177	107.655	2505.985	15.024
Ecad MO N-C	Non Clone- Clone	h4b14	9.294	526.11	139.85	3363.02	15.024
Ecad MO N-C	Non Clone- Clone
Ecad MO N-C	Non Clone- Clone	h4b15	9.186	1060.669	256.216	3595.423	14.848
Ecad MO N-C	Non Clone- Clone	h4b15	9.186	920.658	190.424	3118.257	14.848
Ecad MO N-C	Non Clone- Clone	h4b15	9.186	585.037	93.163	1809.459	14.848
Ecad MO N-C	Non Clone- Clone	h4b15	9.186	287.936	28.044	887.04	14.848
Ecad MO N-C	Non Clone- Clone	h4b15	9.186	239.089	9.292	1029.41	14.848
Ecad MO N-C	Non Clone- Clone	h4b15	9.186	256.826	22.557	1360.275	14.848
Ecad MO N-C	Non Clone- Clone
Ecad MO N-C	Non Clone- Clone	h4b16	10.321	757.047	80.237	3673.182	16.693
Ecad MO N-C	Non Clone- Clone	h4b16	10.321	872.818	124.119	3565.117	16.693
Ecad MO N-C	Non Clone- Clone	h4b16	10.321	860.097	162.327	3786.011	16.693
Ecad MO N-C	Non Clone- Clone	h4b16	10.321	753.122	95.404	2473.559	16.693
Ecad MO N-C	Non Clone- Clone	h4b16	10.321	620.978	119.527	2136.306	16.693
Ecad MO N-C	Non Clone- Clone	h4b16	10.321	499.963	80.988	4081.722	16.693
Ecad MO N-C	Non Clone- Clone	h4b16	10.321	356.86	22.587	4095	16.693
Ecad MO N-C	Non Clone- Clone
Ecad MO N-C	Non Clone- Clone	h4b17	8.591	679.947	105.056	2627.875	13.882
Ecad MO N-C	Non Clone- Clone	h4b17	8.591	632.77	53.413	3327.925	13.882
Ecad MO N-C	Non Clone- Clone	h4b17	8.591	505.899	25.552	1916.131	13.882
Ecad MO N-C	Non Clone- Clone	h4b17	8.591	417.496	70.039	1624.364	13.882
Ecad MO N-C	Non Clone- Clone	h4b17	8.591	358.765	63.789	2154.256	13.882
Ecad MO N-C	Non Clone- Clone	h4b17	8.591	425.023	92.998	2327.153	13.882
Ecad MO N-C	Non Clone- Clone	h5b1	7.295	1340.729	209.557	3678.917	11.773
Ecad MO N-C	Non Clone- Clone	h5b1	7.295	998.135	110.026	3058.297	11.773
Ecad MO N-C	Non Clone- Clone	h5b1	7.295	714.299	85.055	2064.053	11.773
Ecad MO N-C	Non Clone- Clone	h5b1	7.295	522.056	33.69	2049.589	11.773
Ecad MO N-C	Non Clone- Clone	h5b1	7.295	419.228	30.211	2328.694	11.773
Ecad MO N-C	Non Clone- Clone	h5b1	7.295	379.465	11.242	2560.37	11.773
Ecad MO N-C	Non Clone- Clone	h5b1	7.295	336.281	13.188	1808.263	11.773
Ecad MO N-C	Non Clone- Clone
Ecad MO N-C	Non Clone- Clone	h5b2	7.295	1594.97	354.43	4095	11.773
Ecad MO N-C	Non Clone- Clone	h5b2	7.295	1373.826	214.844	3596.292	11.773
Ecad MO N-C	Non Clone- Clone	h5b2	7.295	1092.174	223.523	2875.531	11.773
Ecad MO N-C	Non Clone- Clone	h5b2	7.295	863.616	153.741	2951.118	11.773
Ecad MO N-C	Non Clone- Clone	h5b2	7.295	625.264	147.746	2386.355	11.773
Ecad MO N-C	Non Clone- Clone	h5b2	7.295	430.188	76.304	1316.749	11.773
Ecad MO N-C	Non Clone- Clone	h5b2	7.295	387.112	44.162	2353.845	11.773
Ecad MO N-C	Non Clone- Clone
Ecad MO N-C	Non Clone- Clone	h5b3	6.862	1083.745	241.023	3551.454	11.07
Ecad MO N-C	Non Clone- Clone	h5b3	6.862	862.131	194.394	2988.035	11.07
Ecad MO N-C	Non Clone- Clone	h5b3	6.862	641.707	191.764	2147.624	11.07
Ecad MO N-C	Non Clone- Clone	h5b3	6.862	407.203	94.834	1318.725	11.07
Ecad MO N-C	Non Clone- Clone	h5b3	6.862	261.107	42.333	1805.64	11.07
Ecad MO N-C	Non Clone- Clone	h5b3	6.862	187.247	21.541	538.67	11.07
Ecad MO N-C	Non Clone- Clone	h5b3	6.862	174.6	23.448	769.24	11.07
Ecad MO N-C	Non Clone- Clone
Ecad MO N-C	Non Clone- Clone	h5b4	7.673	884.349	119.223	3640.254	12.388
Ecad MO N-C	Non Clone- Clone	h5b4	7.673	665.365	108.232	3186.64	12.388
Ecad MO N-C	Non Clone- Clone	h5b4	7.673	474.199	78.325	1868.476	12.388
Ecad MO N-C	Non Clone- Clone	h5b4	7.673	332.922	57.258	1210.368	12.388
Ecad MO N-C	Non Clone- Clone	h5b4	7.673	230.876	38.524	762.354	12.388
Ecad MO N-C	Non Clone- Clone	h5b4	7.673	144.838	24.402	462.602	12.388
Ecad MO N-C	Non Clone- Clone	h5b4	7.673	131.128	9.308	501.344	12.388
Ecad MO N-C	Non Clone- Clone
Ecad MO N-C	Non Clone- Clone	h5b5	6.916	1004.88	320.102	3321.606	11.158
Ecad MO N-C	Non Clone- Clone	h5b5	6.916	808.224	204.401	2424.962	11.158
Ecad MO N-C	Non Clone- Clone	h5b5	6.916	630.133	146.544	2871.743	11.158
Ecad MO N-C	Non Clone- Clone	h5b5	6.916	415.114	95.12	1769.456	11.158
Ecad MO N-C	Non Clone- Clone	h5b5	6.916	263.48	60.816	1913.67	11.158
Ecad MO N-C	Non Clone- Clone	h5b5	6.916	197.773	20.384	709	11.158
Ecad MO N-C	Non Clone- Clone
Ecad MO N-C	Non Clone- Clone	h5b6	7.187	1446.717	294.783	4095	11.597
Ecad MO N-C	Non Clone- Clone	h5b6	7.187	936.813	297.85	3031.964	11.597
Ecad MO N-C	Non Clone- Clone	h5b6	7.187	652.094	149.244	2358.26	11.597
Ecad MO N-C	Non Clone- Clone	h5b6	7.187	426.561	109.086	2027.448	11.597
Ecad MO N-C	Non Clone- Clone	h5b6	7.187	273.792	48.047	1362.207	11.597
Ecad MO N-C	Non Clone- Clone
Ecad MO N-C	Non Clone- Clone	h5b7	9.564	1397.065	207.038	4089.186	15.463
Ecad MO N-C	Non Clone- Clone	h5b7	9.564	1009.134	176.913	3654.23	15.463
Ecad MO N-C	Non Clone- Clone	h5b7	9.564	656.823	125.743	2361.932	15.463
Ecad MO N-C	Non Clone- Clone	h5b7	9.564	446.553	86.892	1613.343	15.463
Ecad MO N-C	Non Clone- Clone	h5b7	9.564	296.743	37.232	1386.038	15.463
Ecad MO N-C	Non Clone- Clone	h5b7	9.564	200.204	38.084	920.065	15.463
Ecad MO N-C	Non Clone- Clone	h5b7	9.564	175.249	9.286	1475.721	15.463
Ecad MO N-C	Non Clone- Clone
Ecad MO N-C	Non Clone- Clone	h5b8	7.835	1278.243	106.149	4095	12.652
Ecad MO N-C	Non Clone- Clone	h5b8	7.835	623.169	65.99	2141.042	12.652
Ecad MO N-C	Non Clone- Clone	h5b8	7.835	394.168	47.061	1222.659	12.652
Ecad MO N-C	Non Clone- Clone	h5b8	7.835	293.191	60.641	947.171	12.652
Ecad MO N-C	Non Clone- Clone	h5b8	7.835	229.458	31.862	1002.983	12.652
Ecad MO N-C	Non Clone- Clone
Ecad MO N-C	Non Clone- Clone	h5b9	6.052	1351.537	274.789	3931.999	9.752
Ecad MO N-C	Non Clone- Clone	h5b9	6.052	1102.878	274.966	3158.304	9.752
Ecad MO N-C	Non Clone- Clone	h5b9	6.052	841.099	240.487	2933.072	9.752
Ecad MO N-C	Non Clone- Clone	h5b9	6.052	602.131	159.189	2380.056	9.752
Ecad MO N-C	Non Clone- Clone	h5b9	6.052	372.624	95.847	1093.229	9.752
Ecad MO N-C	Non Clone- Clone	h5b9	6.052	225.316	27.651	1172.592	9.752
Ecad MO N-C	Non Clone- Clone	h5b9	6.052	199.413	31.972	1429.806	9.752
Ecad MO N-C	Non Clone- Clone
Ecad MO N-C	Non Clone- Clone	h5b10	5.944	1994.528	275.428	4095	9.576
Ecad MO N-C	Non Clone- Clone	h5b10	5.944	1896.757	295.931	4095	9.576
Ecad MO N-C	Non Clone- Clone	h5b10	5.944	1650.7	265.873	4095	9.576
Ecad MO N-C	Non Clone- Clone	h5b10	5.944	1063.197	162.219	2470.277	9.576
Ecad MO N-C	Non Clone- Clone	h5b10	5.944	538.477	96.594	1501.58	9.576
Ecad MO N-C	Non Clone- Clone	h5b10	5.944	472.651	159.866	1442.333	9.576
Ecad MO N-C	Non Clone- Clone
Ecad MO N-C	Non Clone- Clone	h5b11	7.835	2041.158	795.494	4094.416	12.652
Ecad MO N-C	Non Clone- Clone	h5b11	7.835	1552.99	601.502	3460.705	12.652
Ecad MO N-C	Non Clone- Clone	h5b11	7.835	1147.057	515.842	2359.405	12.652
Ecad MO N-C	Non Clone- Clone	h5b11	7.835	723.041	302.527	1554.836	12.652
Ecad MO N-C	Non Clone- Clone	h5b11	7.835	419.332	134.116	1414.266	12.652
Ecad MO N-C	Non Clone- Clone	h5b11	7.835	224	62.241	621.837	12.652
Ecad MO N-C	Non Clone- Clone	h5b11	7.835	188.269	28.624	532.832	12.652
Ecad MO N-C	Non Clone- Clone	h6b1	5.836	946.621	220.827	2785.105	9.401
Ecad MO N-C	Non Clone- Clone	h6b1	5.836	860.736	183.93	2890.552	9.401
Ecad MO N-C	Non Clone- Clone	h6b1	5.836	699.992	123.909	2719.045	9.401
Ecad MO N-C	Non Clone- Clone	h6b1	5.836	527.845	88.217	2853.982	9.401
Ecad MO N-C	Non Clone- Clone
Ecad MO N-C	Non Clone- Clone	h6b2	4.917	1201.883	317.826	3070.162	7.907
Ecad MO N-C	Non Clone- Clone	h6b2	4.917	961.25	300.62	2673.209	7.907
Ecad MO N-C	Non Clone- Clone	h6b2	4.917	641.659	170.816	2040.481	7.907
Ecad MO N-C	Non Clone- Clone	h6b2	4.917	431.692	84.937	1970.008	7.907
Ecad MO N-C	Non Clone- Clone	h6b2	4.917	377.453	65.543	3104.367	7.907
Ecad MO N-C	Non Clone- Clone
Ecad MO N-C	Non Clone- Clone	h6b3	8.267	1365.86	349.426	3428.03	13.354
Ecad MO N-C	Non Clone- Clone	h6b3	8.267	1233.569	312.361	3996.247	13.354
Ecad MO N-C	Non Clone- Clone	h6b3	8.267	784.071	160.458	2566.422	13.354
Ecad MO N-C	Non Clone- Clone	h6b3	8.267	394.59	87.676	1076.917	13.354
Ecad MO N-C	Non Clone- Clone	h6b3	8.267	196.089	44.93	690.31	13.354
Ecad MO N-C	Non Clone- Clone
Ecad MO N-C	Non Clone- Clone	h6b4	11.996	1521.817	254.669	4095	19.417
Ecad MO N-C	Non Clone- Clone	h6b4	11.996	922.493	146.434	2433.597	19.417
Ecad MO N-C	Non Clone- Clone	h6b4	11.996	602.003	147.604	1618.481	19.417
Ecad MO N-C	Non Clone- Clone	h6b4	11.996	401.096	64.97	3620.262	19.417
[truncated: 2,431 more rows]
