# Supplementary material for: Stepwise polarisation of developing bilayered epidermis is mediated by aPKC and E-cadherin in zebrafish
Source: eLife. 2020 Jan 22;9:e49064. doi: 10.7554/eLife.49064 (PMC6975926; doi:10.7554/eLife.49064)
Supplement: Figure 5—source data 4. [file elife-49064-fig5-data4.csv]

Genotype	Boundary	Cell name	Area	Mean	Min	Max	Length
Ctrl MO CO	Complete Overlap	h1b1	11.077	677.365	198.272	1580.743	17.923
Ctrl MO CO	Complete Overlap	h1b1	11.077	689.736	170.39	1359.503	17.923
Ctrl MO CO	Complete Overlap	h1b1	11.077	657.743	153.992	1661.882	17.923
Ctrl MO CO	Complete Overlap	h1b1	11.077	561.659	154.006	1789.814	17.923
Ctrl MO CO	Complete Overlap	h1b1	11.077	491.289	172.395	1645.861	17.923
Ctrl MO CO	Complete Overlap	h1b1	11.725	508.691	186.353	1237.616	18.978
Ctrl MO CO	Complete Overlap	h1b1	11.725	465.298	162.859	1122.605	18.978
Ctrl MO CO	Complete Overlap
Ctrl MO CO	Complete Overlap	h1b2	14.103	688.379	198.091	1670.685	22.843
Ctrl MO CO	Complete Overlap	h1b2	14.103	746.22	177.784	1792.317	22.843
Ctrl MO CO	Complete Overlap	h1b2	14.103	760.58	170.532	1986.651	22.843
Ctrl MO CO	Complete Overlap	h1b2	14.103	753.939	189.513	1891.363	22.843
Ctrl MO CO	Complete Overlap	h1b2	14.103	713.66	197.933	1670.87	22.843
Ctrl MO CO	Complete Overlap	h1b2	14.103	667.802	197.681	1458.711	22.843
Ctrl MO CO	Complete Overlap	h1b2	14.103	618.903	218.986	1497.721	22.843
Ctrl MO CO	Complete Overlap	h1b2	14.103	582.686	195.614	1283.597	22.843
Ctrl MO CO	Complete Overlap	h1b2	14.103	557.803	219.485	1311.767	22.843
Ctrl MO CO	Complete Overlap	h2b1	9.888	802.104	252.169	1976.485	15.99
Ctrl MO CO	Complete Overlap	h2b1	9.888	783.07	231.831	1911.615	15.99
Ctrl MO CO	Complete Overlap	h2b1	9.888	758.371	237.45	1808.799	15.99
Ctrl MO CO	Complete Overlap	h2b1	9.888	735.456	274.655	1790.358	15.99
Ctrl MO CO	Complete Overlap	h2b1	9.888	710.466	249.007	1594.278	15.99
Ctrl MO CO	Complete Overlap	h2b1	9.888	693.888	236.456	1482.453	15.99
Ctrl MO CO	Complete Overlap	h2b1	9.888	684.706	231.199	1438.916	15.99
Ctrl MO CO	Complete Overlap
Ctrl MO CO	Complete Overlap	h2b2	5.89	431.994	145.58	1635.209	9.489
Ctrl MO CO	Complete Overlap	h2b2	5.89	493.545	171.692	1702.155	9.489
Ctrl MO CO	Complete Overlap	h2b2	5.89	506.819	165.297	1493.839	9.489
Ctrl MO CO	Complete Overlap	h2b2	6.43	853.091	311.134	1979.013	10.367
Ctrl MO CO	Complete Overlap	h2b2	6.43	854.002	328.874	1895.405	10.367
Ctrl MO CO	Complete Overlap	h2b2	6.43	841.702	391.116	1712.312	10.367
Ctrl MO CO	Complete Overlap	h2b2	6.43	816.053	313.4	1756.056	10.367
Ctrl MO CO	Complete Overlap	h2b2	6.43	782.027	258.5	1632.099	10.367
Ctrl MO CO	Complete Overlap	h2b2	6.43	738.975	214.589	1459.921	10.367
Ctrl MO CO	Complete Overlap	h2b2	6.43	705.08	197.519	1500.88	10.367
Ctrl MO CO	Complete Overlap	h2b2	6.43	663.618	180.706	1300.361	10.367
Ctrl MO CO	Complete Overlap	h2b2	6.43	641.739	209.958	1248.233	10.367
Ctrl MO CO	Complete Overlap	h2b2	6.43	597.143	181.846	1364.273	10.367
Ctrl MO CO	Complete Overlap
Ctrl MO CO	Complete Overlap	h2b3	11.185	1190.344	383.062	2337.776	18.099
Ctrl MO CO	Complete Overlap	h2b3	11.185	1236.231	415.722	2448.267	18.099
Ctrl MO CO	Complete Overlap	h2b3	11.185	1207.639	371.739	2366.427	18.099
Ctrl MO CO	Complete Overlap	h2b3	11.185	1108.379	375.083	2365.184	18.099
Ctrl MO CO	Complete Overlap	h2b3	11.185	1000.581	329.309	2147.412	18.099
Ctrl MO CO	Complete Overlap	h2b3	11.185	904.466	343.95	1801.229	18.099
Ctrl MO CO	Complete Overlap	h2b3	11.185	830.379	325.801	1686.806	18.099
Ctrl MO CO	Complete Overlap	h2b3	11.185	750.62	292.953	1603.553	18.099
Ctrl MO CO	Complete Overlap	h2b3	11.185	670.86	300.989	1722.937	18.099
Ctrl MO CO	Complete Overlap	h2b3	11.185	602.015	279.34	1601.141	18.099
Ctrl MO CO	Complete Overlap	h3b1	12.914	605.718	191.221	1419.455	20.91
Ctrl MO CO	Complete Overlap	h3b1	12.914	658.204	197.535	1394.869	20.91
Ctrl MO CO	Complete Overlap	h3b1	12.914	644.243	199.815	1251.498	20.91
Ctrl MO CO	Complete Overlap	h3b1	12.914	609.404	264.207	1372.351	20.91
Ctrl MO CO	Complete Overlap	h3b1	12.914	553.769	240.299	1252.645	20.91
Ctrl MO CO	Complete Overlap	h3b1	12.914	472.707	216.21	961.463	20.91
Ctrl MO CO	Complete Overlap
Ctrl MO CO	Complete Overlap	h3b2	12.752	646.803	209.695	1384.622	20.647
Ctrl MO CO	Complete Overlap	h3b2	12.752	780.314	245.609	1628.082	20.647
Ctrl MO CO	Complete Overlap	h3b2	12.752	883.65	264.321	1722.352	20.647
Ctrl MO CO	Complete Overlap	h3b2	12.752	868.896	299.72	1779.38	20.647
Ctrl MO CO	Complete Overlap	h3b2	12.752	810.315	331.142	1710.379	20.647
Ctrl MO CO	Complete Overlap	h3b2	12.752	693.454	238.652	1743.198	20.647
Ctrl MO CO	Complete Overlap	h3b2	12.752	585.54	191.221	1760.525	20.647
Ctrl MO CO	Complete Overlap
Ctrl MO CO	Complete Overlap	h3b3	6.7	413.487	0	698.505	10.807
Ctrl MO CO	Complete Overlap	h3b3	6.7	462.519	0	826.297	10.807
Ctrl MO CO	Complete Overlap	h3b3	6.7	544.873	0	1245.648	10.807
Ctrl MO CO	Complete Overlap	h3b3	6.7	591.117	0	1276.076	10.807
Ctrl MO CO	Complete Overlap	h3b3	6.7	628.065	0	1176.268	10.807
Ctrl MO CO	Complete Overlap	h3b3	6.7	656.505	0	1228.053	10.807
Ctrl MO CO	Complete Overlap	h3b3	6.7	583.526	0	1041.149	10.807
Ctrl MO CO	Complete Overlap
Ctrl MO CO	Complete Overlap	h3b4	9.24	463.646	181.569	1082.253	14.936
Ctrl MO CO	Complete Overlap	h3b4	9.24	527.436	218.113	1227.128	14.936
Ctrl MO CO	Complete Overlap	h3b4	9.888	585.088	217.682	1250.451	15.99
Ctrl MO CO	Complete Overlap	h3b4	9.888	589.756	245.036	1247.586	15.99
Ctrl MO CO	Complete Overlap	h3b4	9.888	555.056	236.968	1080.277	15.99
Ctrl MO CO	Complete Overlap	h3b4	9.888	470.47	218.94	1206.447	15.99
Ctrl MO CO	Complete Overlap
Ctrl MO CO	Complete Overlap	h3b5	9.294	473.734	173.133	1246.247	15.024
Ctrl MO CO	Complete Overlap	h3b5	9.294	536.339	159.24	1371.333	15.024
Ctrl MO CO	Complete Overlap	h3b5	9.294	583.397	184.082	1388.949	15.024
Ctrl MO CO	Complete Overlap	h3b5	9.294	565.839	200.939	1477.247	15.024
Ctrl MO CO	Complete Overlap	h3b5	9.294	536.922	215.462	1321.773	15.024
Ctrl MO CO	Complete Overlap	h3b5	9.294	504.943	210.316	1324.712	15.024
Ctrl MO CO	Complete Overlap	h4b1	9.942	738.72	260.509	1731.528	16.078
Ctrl MO CO	Complete Overlap	h4b1	9.942	809.569	279.03	1923.687	16.078
Ctrl MO CO	Complete Overlap	h4b1	9.942	861.167	249.06	2136.7	16.078
Ctrl MO CO	Complete Overlap	h4b1	9.942	912.247	255.425	2092.276	16.078
Ctrl MO CO	Complete Overlap	h4b1	9.942	891.359	291.606	1870.838	16.078
Ctrl MO CO	Complete Overlap	h4b1	9.942	774.071	336.689	1619.826	16.078
Ctrl MO CO	Complete Overlap	h4b1	9.942	628.156	274.089	1433.926	16.078
Ctrl MO CO	Complete Overlap
Ctrl MO CO	Complete Overlap	h4b2	8.537	1064.343	329.112	2296.414	13.794
Ctrl MO CO	Complete Overlap	h4b2	8.537	1220.702	359.754	2551.534	13.794
Ctrl MO CO	Complete Overlap	h4b2	8.537	1279.095	371.131	2601.25	13.794
Ctrl MO CO	Complete Overlap	h4b2	8.537	1318.527	341.472	3187.126	13.794
Ctrl MO CO	Complete Overlap	h4b2	8.537	1348.576	410.404	2995.065	13.794
Ctrl MO CO	Complete Overlap	h4b2	8.537	1294.847	431.302	2812.703	13.794
Ctrl MO CO	Complete Overlap	h4b2	8.537	1035.116	390.059	2291.799	13.794
Ctrl MO CO	Complete Overlap
Ctrl MO CO	Complete Overlap	h4b3	8.7	465.798	199.775	1301.523	14.033
Ctrl MO CO	Complete Overlap	h4b3	8.7	500.4	197.827	1637.377	14.033
Ctrl MO CO	Complete Overlap	h4b3	8.591	742.301	256.419	1549.94	13.847
Ctrl MO CO	Complete Overlap	h4b3	8.591	690.099	247.033	1440.772	13.847
Ctrl MO CO	Complete Overlap	h4b3	8.591	622.067	224.191	1520.138	13.847
Ctrl MO CO	Complete Overlap	h4b3	8.591	619.78	254.017	1673.098	13.847
Ctrl MO CO	Complete Overlap
Ctrl MO CO	Complete Overlap	h4b4	7.673	917.282	332.829	1696.308	12.388
Ctrl MO CO	Complete Overlap	h4b4	7.673	1076.649	395.027	1822.137	12.388
Ctrl MO CO	Complete Overlap	h4b4	7.673	1094.297	403.174	2160.712	12.388
Ctrl MO CO	Complete Overlap	h4b4	7.673	1064.283	391.647	2328.265	12.388
Ctrl MO CO	Complete Overlap	h4b4	7.673	992.647	392.142	2115.709	12.388
Ctrl MO CO	Complete Overlap
Ctrl MO CO	Complete Overlap	h4b5	3.458	865.421	272.626	1940.141	5.535
Ctrl MO CO	Complete Overlap	h4b5	3.458	954.101	264.816	2035.569	5.535
Ctrl MO CO	Complete Overlap	h4b5	3.458	922.138	299.882	1974.183	5.535
Ctrl MO CO	Complete Overlap	h4b5	3.458	849.144	333.198	1821.247	5.535
Ctrl MO CO	Complete Overlap	h4b5	3.458	705.591	374.029	1478.414	5.535
Ctrl MO CO	Complete Overlap
Ctrl MO CO	Complete Overlap	h4b6	8.645	569.506	220.503	1342.86	13.969
Ctrl MO CO	Complete Overlap	h4b6	8.645	585.796	238.35	1359.595	13.969
Ctrl MO CO	Complete Overlap	h4b6	8.645	562.098	233.879	1510.193	13.969
Ctrl MO CO	Complete Overlap	h4b6	9.186	888.156	253.638	2055.459	14.848
Ctrl MO CO	Complete Overlap	h4b6	9.186	930.062	257.178	2328.165	14.848
Ctrl MO CO	Complete Overlap	h4b6	9.186	822.711	305.243	2043.313	14.848
Ctrl MO CO	Complete Overlap	h4b6	9.186	661.065	254.654	1946.856	14.848
Ctrl MO CO	Complete Overlap
Ctrl MO CO	Complete Overlap	h4b7	5.998	587.629	246.428	1205.458	9.664
Ctrl MO CO	Complete Overlap	h4b7	5.998	620.308	240.842	1448.912	9.664
Ctrl MO CO	Complete Overlap	h4b7	5.566	750.307	255.231	1589.624	8.961
Ctrl MO CO	Complete Overlap	h4b7	5.566	749.651	262.646	1613.9	8.961
Ctrl MO CO	Complete Overlap	h4b7	5.566	646.24	235.884	1471.852	8.961
Ctrl MO CO	Complete Overlap	h4b7	5.566	473.055	182.082	1061.044	8.961
Ctrl MO CO	Complete Overlap	h5b1	8.97	448.805	151.002	924.974	14.497
Ctrl MO CO	Complete Overlap	h5b1	8.97	536.876	144.734	1221.496	14.497
Ctrl MO CO	Complete Overlap	h5b1	8.97	552.563	129.273	1163.482	14.497
Ctrl MO CO	Complete Overlap	h5b1	8.97	564.157	105.349	1233.203	14.497
Ctrl MO CO	Complete Overlap	h5b1	8.97	576.698	97.76	1247.076	14.497
Ctrl MO CO	Complete Overlap	h6b1	11.023	1065.167	218.068	2356.987	17.835
Ctrl MO CO	Complete Overlap	h6b1	11.023	1244.891	203.251	2731.693	17.835
Ctrl MO CO	Complete Overlap	h6b1	11.023	1294.729	237.493	2724.451	17.835
Ctrl MO CO	Complete Overlap	h6b1	11.023	1237.659	294.753	2802.852	17.835
Ctrl MO CO	Complete Overlap	h6b1	11.023	1122.427	349.061	2302.993	17.835
Ctrl MO CO	Complete Overlap	h6b1	11.023	1007.976	369.565	2034.559	17.835
Ctrl MO CO	Complete Overlap
Ctrl MO CO	Complete Overlap	h6b2	1.459	689.262	268.618	1293.051	2.284
Ctrl MO CO	Complete Overlap	h6b2	1.459	754.817	272.457	1552.193	2.284
Ctrl MO CO	Complete Overlap	h6b2	1.459	652.02	247.543	1569.899	2.284
Ctrl MO CO	Complete Overlap	h6b2	2.161	782.957	226.035	1531.419	3.426
Ctrl MO CO	Complete Overlap	h6b2	2.161	890.677	329.235	1531.744	3.426
Ctrl MO CO	Complete Overlap	h6b2	2.161	851.629	420.438	1506.545	3.426
Ctrl MO CO	Complete Overlap	h6b2	2.161	729.581	353.115	1319.959	3.426
Ctrl MO CO	Complete Overlap	h6b2	2.161	579.026	310.403	979.729	3.426
Ctrl MO CO	Complete Overlap
Ctrl MO CO	Complete Overlap	h6b3	6.214	938.179	242.315	1744.749	10.016
Ctrl MO CO	Complete Overlap	h6b3	6.214	762.829	247.929	1729.066	10.016
Ctrl MO CO	Complete Overlap	h6b3	6.214	552.985	189.553	1163.98	10.016
Ctrl MO CO	Complete Overlap	h6b3	6.43	790.001	259.018	1745.082	10.367
Ctrl MO CO	Complete Overlap	h6b3	6.43	990.132	342.256	1988.417	10.367
Ctrl MO CO	Complete Overlap	h6b3	6.43	980.643	395.876	1911.544	10.367
Ctrl MO CO	Complete Overlap	h6b3	6.43	874.617	362.763	1622.018	10.367
Ctrl MO CO	Complete Overlap	h6b3	6.43	662.046	305.544	1396.785	10.367
Ctrl MO CO	Complete Overlap	h7b1	12.806	447.22	160.537	848.562	20.735
Ctrl MO CO	Complete Overlap	h7b1	12.806	518.898	172.988	979.676	20.735
Ctrl MO CO	Complete Overlap	h7b1	12.806	546.749	149.489	1141.832	20.735
Ctrl MO CO	Complete Overlap	h7b1	12.806	545.232	152.662	1167.573	20.735
Ctrl MO CO	Complete Overlap	h7b1	12.806	530.552	178.158	1224.109	20.735
Ctrl MO CO	Complete Overlap	h7b1	12.806	491.389	137.769	1069.771	20.735
Ctrl MO CO	Complete Overlap	h7b1	12.806	449.222	167.766	970.143	20.735
Ctrl MO CO	Complete Overlap	h8b1	8.321	641.118	232.993	1334.247	13.442
Ctrl MO CO	Complete Overlap	h8b1	8.321	764.486	254.279	1504.365	13.442
Ctrl MO CO	Complete Overlap	h8b1	8.321	762.994	236.886	1503.673	13.442
Ctrl MO CO	Complete Overlap	h8b1	8.321	716.223	255.591	1714.587	13.442
Ctrl MO CO	Complete Overlap	h8b1	8.321	652.511	247.28	1430.303	13.442
Ctrl MO CO	Complete Overlap	h8b1	8.321	583.654	274.513	1181.774	13.442
Ctrl MO CO	Complete Overlap	h8b1	8.321	528.821	256.169	1202.869	13.442
Ctrl MO CO	Complete Overlap
Ctrl MO CO	Complete Overlap	h8b2	7.889	474.595	168.796	996.091	12.74
Ctrl MO CO	Complete Overlap	h8b2	7.889	619.5	182.564	1522.009	12.74
Ctrl MO CO	Complete Overlap	h8b2	7.889	768.606	196.948	1942.539	12.74
Ctrl MO CO	Complete Overlap	h8b2	7.889	780.81	190.931	2067.365	12.74
Ctrl MO CO	Complete Overlap	h8b2	7.889	737.928	264.108	2224.883	12.74
Ctrl MO CO	Complete Overlap	h8b2	7.889	662.474	293.21	1454.836	12.74
Ctrl MO CO	Complete Overlap
Ctrl MO CO	Complete Overlap	h8b3	10.375	416.772	149.633	1145.759	16.781
Ctrl MO CO	Complete Overlap	h8b3	10.375	474.202	148.344	1498.105	16.781
Ctrl MO CO	Complete Overlap	h8b3	10.375	476.96	151.386	1494.111	16.781
Ctrl MO CO	Complete Overlap	h8b3	10.375	451.541	164.168	1743.91	16.781
Ctrl MO CO	Complete Overlap	h8b3	10.429	548.319	168.652	1614.831	16.869
Ctrl MO CO	Complete Overlap	h8b3	10.429	515.623	202.797	1567.013	16.869
Ctrl MO CO	Complete Overlap	h8b3	10.429	489.467	158.892	1487.571	16.869
Ctrl MO CO	Complete Overlap	h8b3	10.429	446.381	185.741	1395.011	16.869
Ctrl MO CO	Complete Overlap
Ctrl MO PO	Partial Overlap	h1b1	12.914	603.082	181.128	1195.207	20.91
Ctrl MO PO	Partial Overlap	h1b1	12.914	704.176	187.922	1419.037	20.91
Ctrl MO PO	Partial Overlap	h1b1	12.914	787.714	165.421	1829.684	20.91
Ctrl MO PO	Partial Overlap	h1b1	12.914	840.311	161.363	1843.294	20.91
Ctrl MO PO	Partial Overlap	h1b1	12.914	847.265	142.102	1755.198	20.91
Ctrl MO PO	Partial Overlap	h1b1	12.914	781.523	122.097	1588.07	20.91
Ctrl MO PO	Partial Overlap	h1b1	12.914	697.58	103.625	1408.075	20.91
Ctrl MO PO	Partial Overlap	h1b1	12.914	635.777	117.975	1397.705	20.91
Ctrl MO PO	Partial Overlap	h1b1	12.914	555.575	114.182	1356.085	20.91
Ctrl MO PO	Partial Overlap
Ctrl MO PO	Partial Overlap	h1b2	9.186	625.715	236.731	1190.614	14.848
Ctrl MO PO	Partial Overlap	h1b2	9.186	648.035	188.941	1436.95	14.848
Ctrl MO PO	Partial Overlap	h1b2	9.186	642.04	238.003	1562.653	14.848
Ctrl MO PO	Partial Overlap	h1b2	9.186	591.655	214.978	1260.752	14.848
Ctrl MO PO	Partial Overlap	h1b2	9.186	567.304	204.219	1164.638	14.848
Ctrl MO PO	Partial Overlap	h1b2	9.186	546.178	218.695	1084.141	14.848
Ctrl MO PO	Partial Overlap	h1b2	9.186	532.714	207.945	1052.267	14.848
Ctrl MO PO	Partial Overlap	h1b2	9.186	539.16	237.616	1043.37	14.848
Ctrl MO PO	Partial Overlap	h1b2	9.186	530.965	218.25	1088.86	14.848
Ctrl MO PO	Partial Overlap	h2b1	3.458	370.054	136.096	1572.463	5.535
Ctrl MO PO	Partial Overlap	h2b1	3.458	367.142	148.378	1475.205	5.535
Ctrl MO PO	Partial Overlap	h2b1	3.458	336.808	121.063	1336.317	5.535
Ctrl MO PO	Partial Overlap	h2b1	3.458	314.126	114.343	1140.086	5.535
Ctrl MO PO	Partial Overlap	h2b1	3.458	316.663	120.496	1228.216	5.535
Ctrl MO PO	Partial Overlap	h2b1	3.458	325.363	130.021	1261.511	5.535
Ctrl MO PO	Partial Overlap	h2b1	3.458	333.501	137.274	852.919	5.535
Ctrl MO PO	Partial Overlap	h2b1	3.458	360.449	139.218	780.847	5.535
Ctrl MO PO	Partial Overlap	h2b1	3.458	372.679	152.843	740.74	5.535
Ctrl MO PO	Partial Overlap	h2b1	3.458	359.879	145.259	634.253	5.535
Ctrl MO PO	Partial Overlap
Ctrl MO PO	Partial Overlap	h2b2	4.755	1044.174	277.157	2647.066	7.644
Ctrl MO PO	Partial Overlap	h2b2	4.755	1052.618	332.321	2596.72	7.644
Ctrl MO PO	Partial Overlap	h2b2	4.755	916.323	302.664	2275.503	7.644
Ctrl MO PO	Partial Overlap	h2b2	4.755	781.131	276.937	1857.918	7.644
Ctrl MO PO	Partial Overlap	h2b2	4.755	671.835	352.235	1477.201	7.644
Ctrl MO PO	Partial Overlap	h2b2	4.755	620.911	342.134	1179.418	7.644
Ctrl MO PO	Partial Overlap	h2b2	4.755	560.957	292.226	1408.573	7.644
Ctrl MO PO	Partial Overlap	h3b1	10.429	483.671	174.121	1145.443	16.869
Ctrl MO PO	Partial Overlap	h3b1	10.429	549.383	174.446	1439.847	16.869
Ctrl MO PO	Partial Overlap	h3b1	10.429	580.022	239.059	1591.625	16.869
Ctrl MO PO	Partial Overlap	h3b1	10.429	565.75	212.755	1776.517	16.869
Ctrl MO PO	Partial Overlap	h3b1	10.537	704.583	285.294	1717.159	17.045
Ctrl MO PO	Partial Overlap	h3b1	10.537	683.287	294.836	1477.419	17.045
Ctrl MO PO	Partial Overlap	h3b1	10.537	651.528	270.59	1392.188	17.045
Ctrl MO PO	Partial Overlap	h3b1	10.537	570.792	238.876	1398.511	17.045
Ctrl MO PO	Partial Overlap
Ctrl MO PO	Partial Overlap	h3b2	6.592	542.626	160.51	1231.965	10.631
Ctrl MO PO	Partial Overlap	h3b2	6.592	620.363	152.852	1508.912	10.631
Ctrl MO PO	Partial Overlap	h3b2	6.592	726.502	252.714	1662.28	10.631
Ctrl MO PO	Partial Overlap	h3b2	6.592	756.917	294.845	1860.469	10.631
Ctrl MO PO	Partial Overlap	h3b2	6.592	754.713	259.635	1728.232	10.631
Ctrl MO PO	Partial Overlap	h3b2	6.592	669.049	255.618	1699.653	10.631
Ctrl MO PO	Partial Overlap
Ctrl MO PO	Partial Overlap	h3b3	7.511	687.43	193.123	1378.829	12.125
Ctrl MO PO	Partial Overlap	h3b3	7.511	773.653	210.082	1567.263	12.125
Ctrl MO PO	Partial Overlap	h3b3	7.511	764.248	248.932	1725.362	12.125
Ctrl MO PO	Partial Overlap	h3b3	7.511	727.416	293.016	1459.348	12.125
Ctrl MO PO	Partial Overlap	h3b3	7.511	678.18	283.166	1364.206	12.125
Ctrl MO PO	Partial Overlap	h3b3	7.511	610.038	236.004	1227.191	12.125
Ctrl MO PO	Partial Overlap	h4b1	8.808	982.452	358.439	1949.521	14.233
Ctrl MO PO	Partial Overlap	h4b1	8.808	1120.591	372.007	2068.607	14.233
Ctrl MO PO	Partial Overlap	h4b1	8.808	1125.865	380.451	1943.299	14.233
Ctrl MO PO	Partial Overlap	h4b1	8.808	963.958	365.419	2239.933	14.233
Ctrl MO PO	Partial Overlap	h4b1	8.808	717.569	243.458	2210.008	14.233
Ctrl MO PO	Partial Overlap
Ctrl MO PO	Partial Overlap	h4b2	7.187	1026.037	479.449	1886.203	11.597
Ctrl MO PO	Partial Overlap	h4b2	7.187	1089.736	533.16	2198.244	11.597
Ctrl MO PO	Partial Overlap	h4b2	7.187	951.403	524.87	1902.175	11.597
Ctrl MO PO	Partial Overlap	h4b2	7.187	745.749	381.499	1333.429	11.597
Ctrl MO PO	Partial Overlap	h4b2	7.187	529.715	215.396	1010.112	11.597
Ctrl MO PO	Partial Overlap
Ctrl MO PO	Partial Overlap	h4b3	8.375	920.034	299.826	1975.591	13.53
Ctrl MO PO	Partial Overlap	h4b3	8.375	1077.795	290.104	2259.185	13.53
Ctrl MO PO	Partial Overlap	h4b3	8.375	1117.596	332.216	2468.714	13.53
Ctrl MO PO	Partial Overlap	h4b3	8.375	1038.976	369.346	2606.458	13.53
Ctrl MO PO	Partial Overlap	h4b3	8.375	873.039	370.28	1907.665	13.53
Ctrl MO PO	Partial Overlap	h4b3	8.375	704.695	300.228	1545.661	13.53
Ctrl MO PO	Partial Overlap	h4b1	12.86	758.366	196.558	1707.918	20.823
Ctrl MO PO	Partial Overlap	h4b1	12.86	819.327	199.769	2100.965	20.823
Ctrl MO PO	Partial Overlap	h4b1	12.86	830.815	248.467	2146.413	20.823
Ctrl MO PO	Partial Overlap	h4b1	12.86	774.627	264.202	2099.241	20.823
Ctrl MO PO	Partial Overlap	h4b1	12.86	734.507	299.384	1863.472	20.823
Ctrl MO PO	Partial Overlap
Ctrl MO PO	Partial Overlap	h4b2	9.51	673.483	195.243	1298.171	15.375
Ctrl MO PO	Partial Overlap	h4b2	9.51	812.779	191.466	1796.603	15.375
Ctrl MO PO	Partial Overlap	h4b2	9.51	880.727	250.611	2013.904	15.375
Ctrl MO PO	Partial Overlap	h4b2	9.51	845.52	230.275	2046.605	15.375
Ctrl MO PO	Partial Overlap	h4b2	9.51	824.239	247.729	2263.536	15.375
Ctrl MO PO	Partial Overlap	h4b2	9.51	755.809	263.64	2386.952	15.375
Ctrl MO PO	Partial Overlap	h4b2	9.51	705.585	277.779	2195.948	15.375
Ctrl MO PO	Partial Overlap
Ctrl MO PO	Partial Overlap	h4b3	8.7	635.254	217.91	1412.288	14.057
Ctrl MO PO	Partial Overlap	h4b3	8.7	790.377	272.88	1786.267	14.057
Ctrl MO PO	Partial Overlap	h4b3	8.7	807.472	297.267	1704.224	14.057
Ctrl MO PO	Partial Overlap	h4b3	8.7	695.346	276.562	1500.122	14.057
Ctrl MO PO	Partial Overlap	h4b3	8.7	626.058	289.481	1624.728	14.057
Ctrl MO PO	Partial Overlap	h4b3	8.7	612.763	288.56	1600.855	14.057
Ctrl MO PO	Partial Overlap
Ctrl MO PO	Partial Overlap	h4b4	8.808	698.559	255.322	1768.432	14.233
Ctrl MO PO	Partial Overlap	h4b4	8.808	821.201	359.698	2216.213	14.233
Ctrl MO PO	Partial Overlap	h4b4	8.808	879.053	373.276	1930.213	14.233
Ctrl MO PO	Partial Overlap	h4b4	8.808	911.417	437.009	1642.307	14.233
Ctrl MO PO	Partial Overlap	h4b4	8.808	873.798	405.369	1666.958	14.233
Ctrl MO PO	Partial Overlap	h4b4	8.808	763.406	358.822	1800.8	14.233
Ctrl MO PO	Partial Overlap	h4b4	8.808	704.789	263.475	1877.528	14.233
Ctrl MO PO	Partial Overlap
Ctrl MO PO	Partial Overlap	h4b5	9.996	810.603	262.061	1662.209	16.166
Ctrl MO PO	Partial Overlap	h4b5	9.996	861.725	264.351	1826.066	16.166
Ctrl MO PO	Partial Overlap	h4b5	9.996	786.431	228.696	1961.724	16.166
Ctrl MO PO	Partial Overlap	h4b5	9.996	693.823	265.503	1681.753	16.166
Ctrl MO PO	Partial Overlap	h4b5	9.996	621.421	291.245	1383.468	16.166
Ctrl MO PO	Partial Overlap
Ctrl MO PO	Partial Overlap	h4b6	8.321	944.796	241.718	1750.518	13.442
Ctrl MO PO	Partial Overlap	h4b6	8.321	1035.1	334.626	1863.861	13.442
Ctrl MO PO	Partial Overlap	h4b6	8.321	942.183	374.918	2106.916	13.442
Ctrl MO PO	Partial Overlap	h4b6	8.429	896.083	335.544	2130.816	13.618
Ctrl MO PO	Partial Overlap	h4b6	8.429	800.838	366.24	1641.674	13.618
Ctrl MO PO	Partial Overlap	h4b6	8.429	599.065	303.793	1281.6	13.618
Ctrl MO PO	Partial Overlap
Ctrl MO PO	Partial Overlap	h4b7	7.943	892.032	305.728	1678.562	12.827
Ctrl MO PO	Partial Overlap	h4b7	7.943	1055.822	464.195	1891.851	12.827
Ctrl MO PO	Partial Overlap	h4b7	7.943	1113.01	500.541	1958.654	12.827
Ctrl MO PO	Partial Overlap	h4b7	7.943	1072.382	522.001	2169.504	12.827
Ctrl MO PO	Partial Overlap	h4b7	7.943	933.296	379.764	2125.018	12.827
Ctrl MO PO	Partial Overlap	h4b7	7.943	759.298	233.358	1781.69	12.827
Ctrl MO PO	Partial Overlap	h5b1	15.508	393.963	148.778	964.25	25.128
Ctrl MO PO	Partial Overlap	h5b1	15.508	486.237	153.262	1254.078	25.128
Ctrl MO PO	Partial Overlap	h5b1	15.508	529.89	171.344	1594.06	25.128
Ctrl MO PO	Partial Overlap	h5b1	15.508	572.087	150.929	1374.024	25.128
Ctrl MO PO	Partial Overlap	h5b1	15.508	578.11	203.659	1318.525	25.128
Ctrl MO PO	Partial Overlap	h5b1	15.508	535.358	165.465	1238.73	25.128
Ctrl MO PO	Partial Overlap
Ctrl MO PO	Partial Overlap	h5b2	8.7	491.196	183.757	1098.847	14.057
Ctrl MO PO	Partial Overlap	h5b2	8.7	629.528	237.743	1521.979	14.057
Ctrl MO PO	Partial Overlap	h5b2	8.7	674.865	250.765	1677.165	14.057
Ctrl MO PO	Partial Overlap	h5b2	8.7	659.027	276.614	1692.728	14.057
Ctrl MO PO	Partial Overlap	h5b2	8.7	628.973	240.96	1357.813	14.057
Ctrl MO PO	Partial Overlap	h5b2	8.7	549.149	233.273	1209.514	14.057
Ctrl MO PO	Partial Overlap
Ctrl MO PO	Partial Overlap	h5b3	11.942	438.236	136.522	1116.469	19.329
Ctrl MO PO	Partial Overlap	h5b3	11.942	536.345	167.75	1261.134	19.329
Ctrl MO PO	Partial Overlap	h5b3	11.942	588.786	185.006	1355.563	19.329
Ctrl MO PO	Partial Overlap	h5b3	11.942	575.092	130.918	1362.375	19.329
Ctrl MO PO	Partial Overlap	h5b3	11.942	550.398	144.863	1356.386	19.329
Ctrl MO PO	Partial Overlap	h5b3	11.942	486.224	151.089	1150.516	19.329
Ctrl MO PO	Partial Overlap	h6b1	10.969	706.496	188.078	1847.41	17.747
Ctrl MO PO	Partial Overlap	h6b1	10.969	720.446	256.051	1838.987	17.747
Ctrl MO PO	Partial Overlap	h6b1	10.969	747.668	237.726	1864.667	17.747
Ctrl MO PO	Partial Overlap	h6b1	11.563	696.642	258.667	2103.593	18.714
Ctrl MO PO	Partial Overlap	h6b1	11.563	777.612	287.371	2533.889	18.714
Ctrl MO PO	Partial Overlap	h6b1	11.563	753.075	336.013	1681.523	18.714
Ctrl MO PO	Partial Overlap	h6b1	11.563	588.718	293.361	1403.483	18.714
Ctrl MO PO	Partial Overlap	h6b1	11.563	444.564	193.354	1286.499	18.714
Ctrl MO PO	Partial Overlap
Ctrl MO PO	Partial Overlap	h6b2	9.348	750.723	257.853	1833.781	15.101
Ctrl MO PO	Partial Overlap	h6b2	9.348	893.143	267.692	1819.763	15.101
Ctrl MO PO	Partial Overlap	h6b2	9.348	926.973	225.811	2041.433	15.101
Ctrl MO PO	Partial Overlap	h6b2	9.348	917.621	246.644	1861.664	15.101
Ctrl MO PO	Partial Overlap	h6b2	9.348	879.968	202.02	2020.262	15.101
Ctrl MO PO	Partial Overlap	h6b2	9.348	813.202	222.888	1782.503	15.101
Ctrl MO PO	Partial Overlap
Ctrl MO PO	Partial Overlap	h6b3	14.265	715.966	161.697	2560.472	23.107
Ctrl MO PO	Partial Overlap	h6b3	14.265	692.996	196.385	2099.23	23.107
Ctrl MO PO	Partial Overlap	h6b3	14.265	580.793	230.396	1792.049	23.107
Ctrl MO PO	Partial Overlap	h6b3	14.265	497.272	218.209	1420.684	23.107
Ctrl MO PO	Partial Overlap	h6b3	14.265	444.22	204.591	1237.203	23.107
Ctrl MO PO	Partial Overlap	h6b3	14.265	868.832	330.179	1697.269	23.107
Ctrl MO PO	Partial Overlap	h6b3	14.265	754.016	232.92	1689.188	23.107
Ctrl MO PO	Partial Overlap	h6b3	14.265	591.072	145.763	1527.216	23.107
Ctrl MO PO	Partial Overlap
Ctrl MO PO	Partial Overlap	h6b4	7.673	680.339	145.487	1932.212	12.388
Ctrl MO PO	Partial Overlap	h6b4	7.673	835.159	160.466	2035.818	12.388
Ctrl MO PO	Partial Overlap	h6b4	7.673	995.82	179.02	2063.133	12.388
Ctrl MO PO	Partial Overlap	h6b4	7.673	1003.297	252.491	2174.18	12.388
Ctrl MO PO	Partial Overlap	h6b4	7.673	859.832	259.737	1760.438	12.388
Ctrl MO PO	Partial Overlap	h6b4	7.673	662.493	216.592	1479.545	12.388
Ctrl MO PO	Partial Overlap	h6b4	7.673	498.286	188.112	1301.271	12.388
Ctrl MO PO	Partial Overlap	h6b4	7.673	381.611	170.357	987.197	12.388
Ctrl MO PO	Partial Overlap	h7b1	9.78	398.682	188.266	756.973	15.815
Ctrl MO PO	Partial Overlap	h7b1	9.78	444.359	190.418	915.745	15.815
Ctrl MO PO	Partial Overlap	h7b1	9.78	465.805	214.122	1056.196	15.815
Ctrl MO PO	Partial Overlap	h7b1	9.78	466.266	188.976	952.548	15.815
Ctrl MO PO	Partial Overlap	h7b1	9.78	469.072	209.173	1197.476	15.815
Ctrl MO PO	Partial Overlap	h7b1	9.78	460.823	198.445	1246.726	15.815
Ctrl MO PO	Partial Overlap	h7b1	9.78	452.476	221.828	1176.729	15.815
Ctrl MO PO	Partial Overlap	h7b1	9.78	445.221	176.963	1159.325	15.815
Ctrl MO PO	Partial Overlap	h7b1	9.78	438.813	207.579	1116.266	15.815
Ctrl MO PO	Partial Overlap
Ctrl MO PO	Partial Overlap	h7b2	2.215	490.67	211.739	762.23	3.511
Ctrl MO PO	Partial Overlap	h7b2	2.215	507.281	223.207	850.859	3.511
Ctrl MO PO	Partial Overlap	h7b2	2.215	513.4	199.459	870.306	3.511
Ctrl MO PO	Partial Overlap	h7b2	2.215	476.927	218.612	907.903	3.511
Ctrl MO PO	Partial Overlap	h7b2	2.215	431.814	212.716	734.359	3.511
Ctrl MO PO	Partial Overlap	h7b2	2.215	394.696	191.019	684.492	3.511
Ctrl MO PO	Partial Overlap	h7b2	2.215	363.727	195.057	537.596	3.511
Ctrl MO PO	Partial Overlap
Ctrl MO PO	Partial Overlap	h7b3	8.105	474.743	177.663	947.702	13.091
Ctrl MO PO	Partial Overlap	h7b3	8.105	507.686	161.97	975.507	13.091
Ctrl MO PO	Partial Overlap	h7b3	8.105	531.169	185.009	1223.021	13.091
Ctrl MO PO	Partial Overlap	h7b3	8.105	537.735	173.765	1086.833	13.091
Ctrl MO PO	Partial Overlap	h7b3	8.105	524.274	172.708	1046.535	13.091
Ctrl MO PO	Partial Overlap	h7b3	8.105	496.679	196.057	956.522	13.091
Ctrl MO PO	Partial Overlap	h7b3	8.105	455.953	184.036	981.818	13.091
Ctrl MO PO	Partial Overlap	h7b3	8.105	416.915	180.939	950.373	13.091
Ctrl MO PO	Partial Overlap
Ctrl MO PO	Partial Overlap	h7b4	9.348	583.522	233.583	1181.209	15.112
Ctrl MO PO	Partial Overlap	h7b4	9.348	602.635	216.744	1350.793	15.112
Ctrl MO PO	Partial Overlap	h7b4	9.348	584.579	223.711	1395.759	15.112
Ctrl MO PO	Partial Overlap	h7b4	9.348	574.399	253.396	1189.091	15.112
Ctrl MO PO	Partial Overlap	h7b4	9.348	565.743	228.217	1198.93	15.112
Ctrl MO PO	Partial Overlap	h7b4	9.348	552.164	217.329	1115.407	15.112
Ctrl MO PO	Partial Overlap	h7b4	9.348	505.649	159.609	1179.761	15.112
Ctrl MO PO	Partial Overlap	h8b1	8.862	386.192	159.079	900.834	14.321
Ctrl MO PO	Partial Overlap	h8b1	8.862	494.968	189.395	1354.771	14.321
Ctrl MO PO	Partial Overlap	h8b1	8.862	622.965	213.742	1710.695	14.321
Ctrl MO PO	Partial Overlap	h8b1	8.862	687.91	232.458	1540.046	14.321
Ctrl MO PO	Partial Overlap	h8b1	8.862	710.44	270.976	1485.063	14.321
Ctrl MO PO	Partial Overlap	h8b1	8.862	744.712	244.95	1695.894	14.321
Ctrl MO PO	Partial Overlap	h8b1	8.862	758.587	250.555	1677.347	14.321
Ctrl MO PO	Partial Overlap	h8b1	8.862	681.348	295.039	1535.742	14.321
Ctrl MO PO	Partial Overlap
Ctrl MO PO	Partial Overlap	h8b2	8.213	788.065	223.391	2146.71	13.267
Ctrl MO PO	Partial Overlap	h8b2	8.213	757.01	251.557	2069.825	13.267
Ctrl MO PO	Partial Overlap	h8b2	8.213	719.966	268.311	1827.621	13.267
Ctrl MO PO	Partial Overlap	h8b2	8.213	698.369	266.686	1714.096	13.267
Ctrl MO PO	Partial Overlap	h8b2	8.213	659.098	240.591	1549.239	13.267
Ctrl MO PO	Partial Overlap	h8b2	8.213	595.633	208.221	1228.443	13.267
Ctrl MO PO	Partial Overlap	h8b2	8.213	498.402	185.999	1141.707	13.267
Ctrl MO PO	Partial Overlap
Ctrl MO PO	Partial Overlap	h8b3	8.916	418.676	146.804	1085.31	14.398
Ctrl MO PO	Partial Overlap	h8b3	8.916	567.97	187.946	1543.787	14.398
Ctrl MO PO	Partial Overlap	h8b3	8.916	678.924	200.769	1643.551	14.398
Ctrl MO PO	Partial Overlap	h8b3	8.916	741.826	189.6	1763.083	14.398
Ctrl MO PO	Partial Overlap	h8b3	8.916	803.102	206.61	1880.993	14.398
Ctrl MO PO	Partial Overlap	h8b3	8.916	783.157	248.035	1792.935	14.398
Ctrl MO PO	Partial Overlap	h8b3	8.916	711.984	270.494	1683.255	14.398
Ctrl MO PO	Partial Overlap	h8b3	8.916	660.393	279.517	1871.549	14.398
Ctrl MO PO	Partial Overlap	h8b3	8.916	626.273	249.637	1881.422	14.398
Ctrl MO PO	Partial Overlap	h8b3	9.456	765.41	308.517	1779.92	15.28
Ctrl MO PO	Partial Overlap	h8b3	9.456	678.488	234.904	1833.338	15.28
Ctrl MO PO	Partial Overlap	h8b3	9.456	597.015	198.401	2119.212	15.28
Ctrl MO NO	No Overlap	h1b1	4.215	369.548	102.575	978.691	6.765
Ctrl MO NO	No Overlap	h1b1	4.215	355.463	104.028	928.888	6.765
Ctrl MO NO	No Overlap	h1b1	4.215	359.025	98.971	1005.208	6.765
Ctrl MO NO	No Overlap	h1b1	4.215	362.62	96.925	926.537	6.765
Ctrl MO NO	No Overlap	h1b1	4.215	351.633	97.09	878.955	6.765
Ctrl MO NO	No Overlap	h1b1	4.215	348.396	99.059	880.857	6.765
Ctrl MO NO	No Overlap
Ctrl MO NO	No Overlap	h1b2	10.321	688.492	196.985	1835.328	16.693
Ctrl MO NO	No Overlap	h1b2	10.321	717.85	177.926	1695.488	16.693
Ctrl MO NO	No Overlap	h1b2	10.321	702.022	204.826	1496.548	16.693
Ctrl MO NO	No Overlap	h1b2	10.321	670.374	234.116	1706.141	16.693
Ctrl MO NO	No Overlap	h1b2	10.321	623.835	224.071	1406.117	16.693
Ctrl MO NO	No Overlap	h1b2	10.321	576.931	218.208	1190.588	16.693
Ctrl MO NO	No Overlap	h1b2	10.321	559.393	209.272	1186.454	16.693
Ctrl MO NO	No Overlap	h1b2	10.321	539.669	198.222	1127.075	16.693
Ctrl MO NO	No Overlap	h1b2	10.321	530.997	200.585	1114.214	16.693
Ctrl MO NO	No Overlap	h1b2	10.321	503.39	191.405	1177.383	16.693
Ctrl MO NO	No Overlap
Ctrl MO NO	No Overlap	h1b3	9.294	448.458	143.812	1022.332	15.024
Ctrl MO NO	No Overlap	h1b3	9.294	460.446	162.964	1077.63	15.024
Ctrl MO NO	No Overlap	h1b3	9.294	458.26	160.98	1099.984	15.024
Ctrl MO NO	No Overlap	h1b3	9.186	620.872	190.103	1544.041	14.848
Ctrl MO NO	No Overlap	h1b3	9.186	579.219	200.19	1288.943	14.848
Ctrl MO NO	No Overlap	h1b3	9.186	541.792	173.998	1257.739	14.848
Ctrl MO NO	No Overlap	h1b3	9.186	509.549	146.119	1224.041	14.848
Ctrl MO NO	No Overlap	h1b3	9.186	470.56	162.106	1077.081	14.848
Ctrl MO NO	No Overlap	h1b3	9.186	431.576	155.786	1038.216	14.848
Ctrl MO NO	No Overlap	h1b3	9.186	397.362	144.616	926.838	14.848
Ctrl MO NO	No Overlap	h1b3	9.186	357.249	134.07	836.097	14.848
Ctrl MO NO	No Overlap
Ctrl MO NO	No Overlap	h1b4	9.186	677.729	222.443	1448.409	14.848
Ctrl MO NO	No Overlap	h1b4	9.186	631.799	241.74	1332.098	14.848
Ctrl MO NO	No Overlap	h1b4	9.186	596.829	215.021	1124.729	14.848
Ctrl MO NO	No Overlap	h1b4	9.186	562.257	235.157	1104.348	14.848
Ctrl MO NO	No Overlap	h1b4	9.186	544.96	204.652	1340.124	14.848
Ctrl MO NO	No Overlap	h1b4	9.186	506.068	225.845	1183.548	14.848
Ctrl MO NO	No Overlap	h1b4	9.186	480.001	177.516	1050.273	14.848
Ctrl MO NO	No Overlap	h1b4	9.186	445.272	198.275	843.227	14.848
Ctrl MO NO	No Overlap	h1b4	9.186	428.556	173.717	801.585	14.848
Ctrl MO NO	No Overlap
Ctrl MO NO	No Overlap	h1b5	9.564	489.365	162.229	1030.094	15.463
Ctrl MO NO	No Overlap	h1b5	9.564	706.396	194.889	1524.461	15.463
Ctrl MO NO	No Overlap	h1b5	9.564	823.155	231.574	1886.641	15.463
Ctrl MO NO	No Overlap	h1b5	9.564	940.368	258.916	2151.784	15.463
Ctrl MO NO	No Overlap	h1b5	9.564	966.65	267.619	2377.006	15.463
Ctrl MO NO	No Overlap	h1b5	9.564	911.334	277.147	2082.737	15.463
Ctrl MO NO	No Overlap	h1b5	9.564	822.407	333.584	1941.324	15.463
Ctrl MO NO	No Overlap
Ctrl MO NO	No Overlap	h1b6	12.428	370.772	176.885	791.568	20.12
Ctrl MO NO	No Overlap	h1b6	12.428	426.046	211.23	1096.788	20.12
Ctrl MO NO	No Overlap	h1b6	12.428	556.466	224.201	1473.401	20.12
Ctrl MO NO	No Overlap	h1b6	12.428	812.153	259.577	2170.957	20.12
Ctrl MO NO	No Overlap	h1b6	12.428	975.006	342.945	2625.931	20.12
Ctrl MO NO	No Overlap	h1b6	12.428	1071.053	348.194	2879.832	20.12
Ctrl MO NO	No Overlap	h2b1	5.836	816.025	319.122	1949.885	9.401
Ctrl MO NO	No Overlap	h2b1	5.836	771.981	324.422	2463.179	9.401
Ctrl MO NO	No Overlap	h2b1	5.836	693.468	321.641	2550.478	9.401
Ctrl MO NO	No Overlap	h2b1	5.836	976.827	303.025	1952.418	9.401
Ctrl MO NO	No Overlap	h2b1	5.836	820.927	382.069	1724.071	9.401
Ctrl MO NO	No Overlap	h2b1	5.836	732.293	331.908	1386.117	9.401
Ctrl MO NO	No Overlap	h2b1	5.836	656.102	253.6	1335.48	9.401
Ctrl MO NO	No Overlap
Ctrl MO NO	No Overlap	h2b2	10.266	1012.108	287.084	2202.155	16.605
Ctrl MO NO	No Overlap	h2b2	10.266	1256.119	277.375	2652.764	16.605
Ctrl MO NO	No Overlap	h2b2	10.266	1267.062	323.324	2921.798	16.605
Ctrl MO NO	No Overlap	h2b2	10.266	1027.331	377.301	2616.188	16.605
Ctrl MO NO	No Overlap	h2b2	10.266	1344.949	442.943	2538.757	16.605
Ctrl MO NO	No Overlap	h2b2	10.266	1174.255	472.236	2329.955	16.605
Ctrl MO NO	No Overlap	h2b2	10.266	914.96	348.922	1921.808	16.605
Ctrl MO NO	No Overlap	h2b2	10.266	768.83	279.143	1666.444	16.605
Ctrl MO NO	No Overlap
Ctrl MO NO	No Overlap	h2b3	9.51	899.295	295.993	1798.337	15.375
Ctrl MO NO	No Overlap	h2b3	9.51	1153.398	377.641	2672.316	15.375
Ctrl MO NO	No Overlap	h2b3	9.51	1251.335	395.287	3198.899	15.375
Ctrl MO NO	No Overlap	h2b3	9.51	1199.057	337.452	3220.396	15.375
Ctrl MO NO	No Overlap	h2b3	9.51	1076.486	290.811	2840.052	15.375
Ctrl MO NO	No Overlap	h2b3	9.51	838.489	344.98	2424.071	15.375
Ctrl MO NO	No Overlap	h2b3	9.51	636.139	242.023	1760.255	15.375
Ctrl MO NO	No Overlap
Ctrl MO NO	No Overlap	h2b4	6.862	1306.8	582.689	2828.321	11.07
Ctrl MO NO	No Overlap	h2b4	6.862	1117.551	448.203	2487.251	11.07
Ctrl MO NO	No Overlap	h2b4	6.862	923.832	291.898	2047.92	11.07
Ctrl MO NO	No Overlap	h2b4	6.862	802.743	243.762	1864.046	11.07
Ctrl MO NO	No Overlap
Ctrl MO NO	No Overlap	h2b5	7.565	1138.631	330.163	2511.089	12.212
Ctrl MO NO	No Overlap	h2b5	7.565	1307.165	350.578	2669.855	12.212
Ctrl MO NO	No Overlap	h2b5	7.565	1258.104	374.802	2796.859	12.212
Ctrl MO NO	No Overlap	h2b5	7.565	1059.547	417.833	2469.246	12.212
Ctrl MO NO	No Overlap	h2b5	7.565	841.28	434.784	1712.203	12.212
Ctrl MO NO	No Overlap	h2b5	7.565	654.246	296.411	1434.095	12.212
Ctrl MO NO	No Overlap	h2b5	7.565	542.065	255.085	1191.024	12.212
Ctrl MO NO	No Overlap	h3b1	11.023	557.669	197.22	1362.714	17.835
Ctrl MO NO	No Overlap	h3b1	11.023	646.24	202.182	1642.987	17.835
Ctrl MO NO	No Overlap	h3b1	11.023	711.698	217.745	1924.28	17.835
Ctrl MO NO	No Overlap	h3b1	11.023	664.492	205.851	1886.974	17.835
Ctrl MO NO	No Overlap	h3b1	11.023	598.806	266.084	1562.155	17.835
Ctrl MO NO	No Overlap	h3b1	11.023	524.107	261.195	1234.44	17.835
Ctrl MO NO	No Overlap	h3b1	11.023	467.931	210.869	936.103	17.835
Ctrl MO NO	No Overlap
Ctrl MO NO	No Overlap	h3b2	15.13	441.339	165.413	979.276	24.513
Ctrl MO NO	No Overlap	h3b2	15.13	517.319	188.815	1180.469	24.513
Ctrl MO NO	No Overlap	h3b2	15.13	577.826	192.152	1349.109	24.513
Ctrl MO NO	No Overlap	h3b2	15.13	573.774	190.387	1521.446	24.513
Ctrl MO NO	No Overlap	h3b2	15.13	554.344	213.837	1208.4	24.513
Ctrl MO NO	No Overlap	h3b2	15.13	508.745	187.313	1653.033	24.513
Ctrl MO NO	No Overlap	h3b2	15.13	433.19	185.292	1266.14	24.513
Ctrl MO NO	No Overlap
Ctrl MO NO	No Overlap	h3b3	16.805	517.523	150.619	1132.34	27.236
Ctrl MO NO	No Overlap	h3b3	16.805	603.859	194.652	1439.509	27.236
Ctrl MO NO	No Overlap	h3b3	16.805	694.512	208.283	1551.287	27.236
Ctrl MO NO	No Overlap	h3b3	16.805	742.364	236.501	1694.332	27.236
Ctrl MO NO	No Overlap	h3b3	16.805	758.39	239.051	1818.858	27.236
Ctrl MO NO	No Overlap	h3b3	16.805	734.365	273.996	1715.791	27.236
Ctrl MO NO	No Overlap	h3b3	16.805	629.028	233.761	1659.004	27.236
Ctrl MO NO	No Overlap
Ctrl MO NO	No Overlap	h3b4	15.832	523.359	188.774	1090.043	25.655
Ctrl MO NO	No Overlap	h3b4	15.832	604.543	213.779	1300.453	25.655
Ctrl MO NO	No Overlap	h3b4	15.832	638.837	193.797	1405.88	25.655
Ctrl MO NO	No Overlap	h3b4	15.832	601.139	222.903	1281.288	25.655
Ctrl MO NO	No Overlap	h3b4	15.832	536.244	214.173	1121.366	25.655
Ctrl MO NO	No Overlap	h3b4	15.832	467.601	212.795	975.329	25.655
Ctrl MO NO	No Overlap	h3b4	15.832	428.464	193.525	916.37	25.655
Ctrl MO NO	No Overlap
Ctrl MO NO	No Overlap	h3b5	7.727	591.246	165.899	1336.692	12.476
Ctrl MO NO	No Overlap	h3b5	7.727	696.165	195.664	1518.084	12.476
Ctrl MO NO	No Overlap	h3b5	7.727	699.709	219.583	1497.207	12.476
Ctrl MO NO	No Overlap	h3b5	7.727	651.956	214.892	1433.235	12.476
Ctrl MO NO	No Overlap	h3b5	7.727	570.731	236.388	1297.078	12.476
Ctrl MO NO	No Overlap	h3b5	7.727	479.313	185.246	1172.601	12.476
Ctrl MO NO	No Overlap	h3b5	7.727	426.669	198.629	868.073	12.476
Ctrl MO NO	No Overlap	h5b1	10.158	604.125	185.307	1241.418	16.43
Ctrl MO NO	No Overlap	h5b1	10.158	615.907	235.44	1395.772	16.43
Ctrl MO NO	No Overlap	h5b1	10.158	576.244	198.817	1116.357	16.43
Ctrl MO NO	No Overlap	h5b1	10.158	567.785	261.13	1270.834	16.43
Ctrl MO NO	No Overlap	h5b1	10.158	530.617	209.417	1522.703	16.43
Ctrl MO NO	No Overlap
Ctrl MO NO	No Overlap	h5b2	6.16	503.643	188.399	1053.817	9.928
Ctrl MO NO	No Overlap	h5b2	6.16	587.155	206.829	1075.752	9.928
Ctrl MO NO	No Overlap	h5b2	6.16	582.51	272.92	1286.24	9.928
Ctrl MO NO	No Overlap	h5b2	6.16	470.463	188.413	1110.861	9.928
Ctrl MO NO	No Overlap	h5b2	6.16	357.939	160.996	1194.286	9.928
Ctrl MO NO	No Overlap
Ctrl MO NO	No Overlap	h5b3	11.779	589.645	210.434	1073.929	19.065
Ctrl MO NO	No Overlap	h5b3	11.779	676.635	257.774	1357.414	19.065
Ctrl MO NO	No Overlap	h5b3	11.779	613.508	278.971	1476.719	19.065
Ctrl MO NO	No Overlap	h5b3	11.779	469.492	173.968	1522.725	19.065
Ctrl MO NO	No Overlap	h5b3	11.779	382.895	161.302	1374.914	19.065
Ctrl MO NO	No Overlap
Ctrl MO NO	No Overlap	h5b4	8.97	553.692	176.668	1152.76	14.497
Ctrl MO NO	No Overlap	h5b4	8.97	645.913	209.974	1407.454	14.497
Ctrl MO NO	No Overlap	h5b4	8.97	662.18	219.803	1381.709	14.497
Ctrl MO NO	No Overlap	h5b4	8.97	593.544	235.394	1318.233	14.497
Ctrl MO NO	No Overlap	h5b4	8.97	511.655	193.176	1129.938	14.497
Ctrl MO NO	No Overlap
Ctrl MO NO	No Overlap	h5b5	12.482	398.812	124.901	943.776	20.207
Ctrl MO NO	No Overlap	h5b5	12.482	467.493	134.242	1369.674	20.207
Ctrl MO NO	No Overlap	h5b5	12.482	488.4	159.297	1308.894	20.207
Ctrl MO NO	No Overlap	h5b5	12.482	470.605	172.497	1206.605	20.207
Ctrl MO NO	No Overlap	h5b5	12.482	412.017	198.342	982.904	20.207
Ctrl MO NO	No Overlap	h5b5	12.482	390.125	173.765	1117.452	20.207
Ctrl MO NO	No Overlap
Ctrl MO NO	No Overlap	h5b6	5.025	597.225	182.633	1090.546	8.083
Ctrl MO NO	No Overlap	h5b6	5.025	715.376	285.746	1260.509	8.083
Ctrl MO NO	No Overlap	h5b6	5.025	756.673	341.614	1397.634	8.083
Ctrl MO NO	No Overlap	h5b6	5.025	736.046	315.408	1285.827	8.083
Ctrl MO NO	No Overlap	h5b6	5.025	657.066	333.909	1256.876	8.083
Ctrl MO NO	No Overlap	h5b6	5.025	551.313	257.225	1397.648	8.083
Ctrl MO NO	No Overlap
Ctrl MO NO	No Overlap	h5b7	8.916	593.94	198.577	1172.321	14.409
Ctrl MO NO	No Overlap	h5b7	8.916	644.411	249.257	1246.322	14.409
Ctrl MO NO	No Overlap	h5b7	8.916	646.092	232.365	1435.502	14.409
Ctrl MO NO	No Overlap	h5b7	8.916	602.475	211.297	1363.361	14.409
Ctrl MO NO	No Overlap	h5b7	8.916	554.925	180.602	1143.986	14.409
Ctrl MO NO	No Overlap	h6b1	12.806	1072.423	240.676	2664.022	20.735
Ctrl MO NO	No Overlap	h6b1	12.806	1047.113	291.479	2428.49	20.735
Ctrl MO NO	No Overlap	h6b1	12.806	961.35	277.69	2077.56	20.735
Ctrl MO NO	No Overlap	h6b1	12.806	904.65	336.416	1854.092	20.735
Ctrl MO NO	No Overlap	h6b1	12.806	850.014	398.664	1948.651	20.735
Ctrl MO NO	No Overlap	h6b1	12.806	720.63	276.513	1614.8	20.735
Ctrl MO NO	No Overlap	h6b1	12.806	565.44	227.722	1247.154	20.735
Ctrl MO NO	No Overlap
Ctrl MO NO	No Overlap	h6b2	18.588	988.375	247.993	2384.444	30.136
Ctrl MO NO	No Overlap	h6b2	18.588	1011.858	290.392	2207.362	30.136
Ctrl MO NO	No Overlap	h6b2	18.588	952.478	302.229	2080.087	30.136
Ctrl MO NO	No Overlap	h6b2	18.588	756.907	244.126	1748.636	30.136
Ctrl MO NO	No Overlap	h6b2	18.588	544.579	202.582	1238.611	30.136
Ctrl MO NO	No Overlap	h6b2	18.588	416.838	189.265	843.471	30.136
Ctrl MO NO	No Overlap	h6b2	18.588	376.176	189.317	940.511	30.136
Ctrl MO NO	No Overlap	h6b2	18.588	668.632	236.094	1737.844	30.136
Ctrl MO NO	No Overlap	h6b2	18.588	597.376	209.03	1420.927	30.136
Ctrl MO NO	No Overlap	h6b2	18.588	455.463	141.322	1051.686	30.136
Ctrl MO NO	No Overlap
Ctrl MO NO	No Overlap	h6b3	8.754	508.784	167.51	1470.647	14.145
Ctrl MO NO	No Overlap	h6b3	8.754	543.394	149.737	1478.347	14.145
Ctrl MO NO	No Overlap	h6b3	8.754	551.699	157.372	1628.848	14.145
Ctrl MO NO	No Overlap	h6b3	8.754	550.498	136.065	1713.917	14.145
Ctrl MO NO	No Overlap	h6b3	8.754	565.071	168.08	1491.956	14.145
Ctrl MO NO	No Overlap	h6b3	8.754	620.871	200.059	1470.711	14.145
Ctrl MO NO	No Overlap	h6b3	8.754	719.155	226.096	1511.609	14.145
Ctrl MO NO	No Overlap	h6b3	8.754	802.201	241.924	1684.99	14.145
Ctrl MO NO	No Overlap	h6b3	8.754	788.04	237.627	1957.111	14.145
Ctrl MO NO	No Overlap
Ctrl MO NO	No Overlap	h6b4	9.078	818.962	203.737	1858.378	14.672
Ctrl MO NO	No Overlap	h6b4	9.078	935.774	205.233	2539.094	14.672
Ctrl MO NO	No Overlap	h6b4	9.078	941.616	213.615	2599.579	14.672
Ctrl MO NO	No Overlap	h6b4	9.078	876.72	204.808	2222.483	14.672
Ctrl MO NO	No Overlap	h6b4	9.078	861.126	263.017	1953.662	14.672
Ctrl MO NO	No Overlap	h6b4	9.078	870.056	329.317	1717.32	14.672
Ctrl MO NO	No Overlap	h6b4	9.078	843.594	318.885	1676.096	14.672
Ctrl MO NO	No Overlap	h6b4	9.078	756.78	287.311	1861.755	14.672
Ctrl MO NO	No Overlap	h7b1	9.186	535.547	228.522	1170.399	14.848
Ctrl MO NO	No Overlap	h7b1	9.186	602.519	268.157	1489.304	14.848
Ctrl MO NO	No Overlap	h7b1	9.186	646.655	276.3	1494.468	14.848
Ctrl MO NO	No Overlap	h7b1	9.186	781.529	373.114	1459.738	14.848
Ctrl MO NO	No Overlap	h7b1	9.186	741.738	354.333	1373.547	14.848
Ctrl MO NO	No Overlap	h7b1	9.186	662.242	295.138	1239.755	14.848
Ctrl MO NO	No Overlap	h7b1	9.186	582.865	302.848	1131.262	14.848
Ctrl MO NO	No Overlap	h7b1	9.186	528.835	247.985	1181.624	14.848
Ctrl MO NO	No Overlap	h7b1	9.186	479.291	240.595	1090.042	14.848
Ctrl MO NO	No Overlap
Ctrl MO NO	No Overlap	h7b2	14.211	672.309	224.512	1351.911	23.019
Ctrl MO NO	No Overlap	h7b2	14.211	705.447	231.208	1317.198	23.019
Ctrl MO NO	No Overlap	h7b2	14.211	710.151	232.355	1372.149	23.019
Ctrl MO NO	No Overlap	h7b2	14.211	692.228	215.797	1311.27	23.019
Ctrl MO NO	No Overlap	h7b2	14.211	670.633	207.433	1212.394	23.019
Ctrl MO NO	No Overlap	h7b2	14.211	624.872	195.762	1283.254	23.019
Ctrl MO NO	No Overlap	h7b2	14.211	567.976	177.078	1316.938	23.019
Ctrl MO NO	No Overlap
Ctrl MO NO	No Overlap	h7b3	10.699	490.132	159.931	1204.859	17.308
Ctrl MO NO	No Overlap	h7b3	10.699	512.188	175.416	1277.017	17.308
Ctrl MO NO	No Overlap	h7b3	10.699	505.527	215.535	1248.113	17.308
Ctrl MO NO	No Overlap	h7b3	10.699	483.516	201.319	1126.187	17.308
Ctrl MO NO	No Overlap	h7b3	10.699	466.669	174.886	1098.699	17.308
Ctrl MO NO	No Overlap	h7b3	10.699	444.992	188.311	1090.556	17.308
Ctrl MO NO	No Overlap	h7b3	10.699	418.329	151.972	1007.698	17.308
Ctrl MO NO	No Overlap
Ctrl MO NO	No Overlap	h7b4	8.7	506.58	187.908	1116.637	14.057
Ctrl MO NO	No Overlap	h7b4	8.7	553.896	201.234	1197.213	14.057
Ctrl MO NO	No Overlap	h7b4	8.7	598.346	185.801	1443.966	14.057
Ctrl MO NO	No Overlap	h7b4	8.7	642.092	194.339	1430.009	14.057
Ctrl MO NO	No Overlap	h7b4	8.7	637.335	183.74	1332.592	14.057
Ctrl MO NO	No Overlap	h7b4	8.7	623.486	193.665	1395.329	14.057
Ctrl MO NO	No Overlap	h7b4	8.7	594.539	209.293	1260.492	14.057
Ctrl MO NO	No Overlap
Ctrl MO NO	No Overlap	h7b5	10.537	420.406	181.519	929.936	17.045
Ctrl MO NO	No Overlap	h7b5	10.537	426.582	136.72	1078.962	17.045
Ctrl MO NO	No Overlap	h7b5	10.537	428.489	178.368	886.664	17.045
Ctrl MO NO	No Overlap	h7b5	10.537	412.311	162.354	890.076	17.045
Ctrl MO NO	No Overlap	h7b5	10.537	401.427	191.87	792.456	17.045
Ctrl MO NO	No Overlap	h7b5	10.537	383.102	127.161	795.257	17.045
Ctrl MO NO	No Overlap	h7b5	10.537	366.858	161.319	752.578	17.045
Ctrl MO NO	No Overlap	h8b1	5.674	594.095	168.222	1928.62	9.137
Ctrl MO NO	No Overlap	h8b1	5.674	604.74	183.866	1694.471	9.137
Ctrl MO NO	No Overlap	h8b1	5.674	594.216	188.352	1616.208	9.137
Ctrl MO NO	No Overlap	h8b1	5.674	846.77	177.989	1703.048	9.137
Ctrl MO NO	No Overlap	h8b1	5.674	843.881	197.942	1876.328	9.137
Ctrl MO NO	No Overlap	h8b1	5.674	858.232	245.484	1872.807	9.137
Ctrl MO NO	No Overlap	h8b1	5.674	810.335	254.501	1710.854	9.137
Ctrl MO NO	No Overlap	h8b1	5.674	649.452	251.16	1447.86	9.137
Ctrl MO NO	No Overlap	h8b1	5.674	490.78	223.541	1082.058	9.137
Ctrl MO NO	No Overlap
Ctrl MO NO	No Overlap	h8b2	10.753	634.031	157.871	1610.842	17.396
Ctrl MO NO	No Overlap	h8b2	10.753	735.276	161.853	2207.129	17.396
Ctrl MO NO	No Overlap	h8b2	10.753	831.399	206.876	2452.772	17.396
Ctrl MO NO	No Overlap	h8b2	10.753	911.965	200.854	2370.181	17.396
Ctrl MO NO	No Overlap	h8b2	10.753	916.936	201.732	2281.199	17.396
Ctrl MO NO	No Overlap	h8b2	10.753	916.444	248.063	2291.553	17.396
Ctrl MO NO	No Overlap	h8b2	10.753	903.842	238.681	2164.054	17.396
Ctrl MO NO	No Overlap	h8b2	10.753	861.749	277.62	1899.507	17.396
Ctrl MO NO	No Overlap
Ctrl MO NO	No Overlap	h8b3	10.321	759.83	211.493	1913.758	16.693
Ctrl MO NO	No Overlap	h8b3	10.321	840.842	220.336	2138.101	16.693
Ctrl MO NO	No Overlap	h8b3	10.321	835.383	206.573	1934.571	16.693
Ctrl MO NO	No Overlap	h8b3	10.321	800.995	233.894	1865.686	16.693
Ctrl MO NO	No Overlap	h8b3	10.321	752.726	211.12	1795.052	16.693
Ctrl MO NO	No Overlap
Ctrl MO NO	No Overlap	h8b4	11.131	541.292	176.473	1157.661	18.011
Ctrl MO NO	No Overlap	h8b4	11.131	678.88	218.581	1602.079	18.011
Ctrl MO NO	No Overlap	h8b4	11.131	810.912	214.247	1820.726	18.011
Ctrl MO NO	No Overlap	h8b4	11.131	828.355	264.318	2022.788	18.011
Ctrl MO NO	No Overlap	h8b4	11.131	798.318	273.318	1992.882	18.011
Ctrl MO NO	No Overlap	h8b4	11.131	750.245	242.141	1848.868	18.011
Ctrl MO NO	No Overlap
Ctrl MO NO	No Overlap	h8b5	6.646	775.468	276.84	1911.62	10.719
Ctrl MO NO	No Overlap	h8b5	6.646	886.791	304.082	2118.141	10.719
Ctrl MO NO	No Overlap	h8b5	6.646	1163.293	323.911	2003.533	10.719
Ctrl MO NO	No Overlap	h8b5	6.646	1081.491	453.41	1658.76	10.719
Ctrl MO NO	No Overlap	h8b5	6.646	927.238	364.628	1941.864	10.719
Ctrl MO NO	No Overlap	h8b5	6.646	756.46	381.656	1873.168	10.719
Ctrl MO NO	No Overlap	h8b5	6.646	632.189	293.645	1322.03	10.719
Ctrl MO NO	No Overlap	h8b5	6.646	521.049	213.633	1181.608	10.719
Ctrl MO NO	No Overlap
Ctrl MO NO	No Overlap	h8b6	10.915	623.349	202.257	1252.294	17.66
Ctrl MO NO	No Overlap	h8b6	10.915	721.853	219.834	1435.01	17.66
Ctrl MO NO	No Overlap	h8b6	10.915	815.583	214.925	1777.96	17.66
Ctrl MO NO	No Overlap	h8b6	10.915	862.279	200.864	2115.047	17.66
Ctrl MO NO	No Overlap	h8b6	10.915	852.74	213.917	2002.623	17.66
Ctrl MO NO	No Overlap	h8b6	10.915	836.703	235.972	2008.439	17.66
Ctrl MO NO	No Overlap	h8b6	10.915	834.945	225.691	1760.347	17.66
Ctrl MO NO	No Overlap	h8b6	10.915	818.076	255.069	1567.821	17.66
Ctrl MO NO	No Overlap	h8b6	10.915	785.462	301.352	1669.286	17.66
Ecad MO CO	Complete Overlap	h1b1	17.399	542.75	172.231	1184.22	28.203
Ecad MO CO	Complete Overlap	h1b1	17.399	596.25	199.589	1288.914	28.203
Ecad MO CO	Complete Overlap	h1b1	17.399	661.296	235.004	1544.658	28.203
Ecad MO CO	Complete Overlap	h1b1	17.399	705.899	252.09	1572.919	28.203
Ecad MO CO	Complete Overlap	h1b1	17.399	701.836	230.074	1598.558	28.203
Ecad MO CO	Complete Overlap	h1b1	17.399	665.85	254.765	1486.128	28.203
Ecad MO CO	Complete Overlap	h1b1	17.399	626.814	214.456	1473.067	28.203
Ecad MO CO	Complete Overlap	h1b1	17.399	582.413	205.704	1308.525	28.203
Ecad MO CO	Complete Overlap	h1b1	17.399	557.114	231.816	1299.875	28.203
Ecad MO CO	Complete Overlap
Ecad MO CO	Complete Overlap	h1b2	5.998	312.745	145.516	687.999	9.664
Ecad MO CO	Complete Overlap	h1b2	5.998	353.637	145.707	694.755	9.664
Ecad MO CO	Complete Overlap	h1b2	5.998	379.684	124.826	880.428	9.664
Ecad MO CO	Complete Overlap	h1b2	5.998	405.5	193.676	1050.764	9.664
Ecad MO CO	Complete Overlap	h1b2	5.998	425.392	192.896	915.978	9.664
Ecad MO CO	Complete Overlap	h1b2	5.944	666.997	229.046	1517.956	9.577
Ecad MO CO	Complete Overlap	h1b2	5.944	650.429	204.167	1420.927	9.577
Ecad MO CO	Complete Overlap	h1b2	5.944	584.261	220.955	1444.696	9.577
Ecad MO CO	Complete Overlap	h1b2	5.944	482.87	185.2	1329.562	9.577
Ecad MO CO	Complete Overlap
Ecad MO CO	Complete Overlap	h1b3	9.186	677.061	282.18	1370.446	14.848
Ecad MO CO	Complete Overlap	h1b3	9.186	757.447	294.421	1704.459	14.848
Ecad MO CO	Complete Overlap	h1b3	9.186	785.302	242.706	1682.19	14.848
Ecad MO CO	Complete Overlap	h1b3	9.186	744.512	244.649	1650.43	14.848
Ecad MO CO	Complete Overlap	h1b3	9.186	685.548	277.574	1628.816	14.848
Ecad MO CO	Complete Overlap	h1b3	9.186	613.628	267.444	1330.584	14.848
Ecad MO CO	Complete Overlap	h1b3	9.348	622.561	254.159	1168.199	15.112
Ecad MO CO	Complete Overlap	h1b3	9.348	593.971	246.445	1217.826	15.112
Ecad MO CO	Complete Overlap	h1b3	9.348	552.349	198.576	1171	15.112
Ecad MO CO	Complete Overlap	h1b3	9.348	499.812	192.11	1216.205	15.112
Ecad MO CO	Complete Overlap	h1b3	9.348	441.573	141.267	1829.034	15.112
Ecad MO CO	Complete Overlap	h2b1	17.129	1985.153	281.721	2779	27.763
Ecad MO CO	Complete Overlap	h2b1	17.129	667.389	300.977	1544.197	27.763
Ecad MO CO	Complete Overlap	h2b1	17.129	801.669	366.913	1671.46	27.763
Ecad MO CO	Complete Overlap	h2b1	17.129	913.58	357.779	2004.316	27.763
Ecad MO CO	Complete Overlap	h2b1	17.129	1050.801	469.418	2049.559	27.763
Ecad MO CO	Complete Overlap	h2b1	17.129	1138.85	451.572	2481.708	27.763
Ecad MO CO	Complete Overlap	h2b1	17.129	993.639	391.197	2173.935	27.763
Ecad MO CO	Complete Overlap
Ecad MO CO	Complete Overlap	h2b2	11.239	683.019	207.654	1350.434	18.187
Ecad MO CO	Complete Overlap	h2b2	11.239	798.489	243.688	1710.628	18.187
Ecad MO CO	Complete Overlap	h2b2	11.239	862.511	291.604	1895.82	18.187
Ecad MO CO	Complete Overlap	h2b2	11.239	915.158	301.35	1977.957	18.187
Ecad MO CO	Complete Overlap	h2b2	11.239	1077.266	362.1	2144.393	18.187
Ecad MO CO	Complete Overlap	h2b2	11.239	1106.562	478.75	2327.559	18.187
Ecad MO CO	Complete Overlap	h2b2	11.239	991.224	380.351	2002.455	18.187
Ecad MO CO	Complete Overlap	h2b2	11.239	859.374	339.038	2063.501	18.187
Ecad MO CO	Complete Overlap	h2b2	11.239	769.187	304.125	1998.188	18.187
Ecad MO CO	Complete Overlap
Ecad MO CO	Complete Overlap	h2b3	11.023	590.703	176.993	1327.026	17.835
Ecad MO CO	Complete Overlap	h2b3	11.023	759.525	207.258	1761.056	17.835
Ecad MO CO	Complete Overlap	h2b3	11.023	918.305	213.882	2196.595	17.835
Ecad MO CO	Complete Overlap	h2b3	11.023	1002.292	252.572	2459.456	17.835
Ecad MO CO	Complete Overlap	h2b3	11.023	1045.017	284.577	2203.882	17.835
Ecad MO CO	Complete Overlap	h2b3	11.023	1025.475	301.58	2296.272	17.835
Ecad MO CO	Complete Overlap	h2b3	11.023	921.597	341.92	1922.189	17.835
Ecad MO CO	Complete Overlap	h2b3	11.023	796.744	311.131	1927.689	17.835
Ecad MO CO	Complete Overlap
Ecad MO CO	Complete Overlap	h2b4	8.051	542.051	224.388	996.307	13.003
Ecad MO CO	Complete Overlap	h2b4	8.051	628.625	209.427	1257.64	13.003
Ecad MO CO	Complete Overlap	h2b4	8.051	690.208	281.238	1539.891	13.003
Ecad MO CO	Complete Overlap	h2b4	8.051	761.776	306.774	1865.092	13.003
Ecad MO CO	Complete Overlap	h2b4	8.7	1041.361	373.706	2045.312	14.057
Ecad MO CO	Complete Overlap	h2b4	8.7	970.592	335.818	1932.405	14.057
Ecad MO CO	Complete Overlap	h2b4	8.7	826.583	299.266	1605.525	14.057
Ecad MO CO	Complete Overlap	h2b4	8.7	703.324	270.913	1380.339	14.057
Ecad MO CO	Complete Overlap	h3b1	9.51	900.213	321.212	1771.826	15.375
Ecad MO CO	Complete Overlap	h3b1	9.51	968.536	308.971	1998.436	15.375
Ecad MO CO	Complete Overlap	h3b1	9.51	993.048	374.065	2224.284	15.375
Ecad MO CO	Complete Overlap	h3b1	9.51	1057.779	456.114	2127.646	15.375
Ecad MO CO	Complete Overlap	h3b1	9.51	1023.384	404.573	2401.66	15.375
Ecad MO CO	Complete Overlap
Ecad MO CO	Complete Overlap	h3b2	8.321	923.073	328.474	1978.23	13.442
Ecad MO CO	Complete Overlap	h3b2	8.321	972.815	299.06	2127.634	13.442
Ecad MO CO	Complete Overlap	h3b2	8.321	941.56	440.095	2134.8	13.442
Ecad MO CO	Complete Overlap	h3b2	8.321	836.208	374.356	2095.635	13.442
Ecad MO CO	Complete Overlap	h3b2	8.321	715.445	278.932	1864.17	13.442
Ecad MO CO	Complete Overlap
Ecad MO CO	Complete Overlap	h3b3	2.323	575.343	239.524	1213.569	3.69
Ecad MO CO	Complete Overlap	h3b3	2.323	641.78	294.844	1458.06	3.69
Ecad MO CO	Complete Overlap	h3b3	2.323	674.577	350.908	1621.547	3.69
Ecad MO CO	Complete Overlap	h3b3	2.432	942.766	455.659	1488.725	3.866
Ecad MO CO	Complete Overlap	h3b3	2.432	769.93	462.418	1243.786	3.866
Ecad MO CO	Complete Overlap	h3b3	2.432	649.662	371.872	1090.124	3.866
Ecad MO CO	Complete Overlap
Ecad MO CO	Complete Overlap	h3b4	8.429	964.6	392.199	1633.425	13.618
Ecad MO CO	Complete Overlap	h3b4	8.429	1041.884	446.189	1925.612	13.618
Ecad MO CO	Complete Overlap	h3b4	8.429	1089.393	655.735	2040.053	13.618
Ecad MO CO	Complete Overlap	h3b4	8.429	1070.355	597.046	1841.313	13.618
Ecad MO CO	Complete Overlap	h3b4	8.429	978.526	538.783	1641.404	13.618
Ecad MO CO	Complete Overlap	h3b4	8.429	874.629	451.241	1729.862	13.618
Ecad MO CO	Complete Overlap
Ecad MO CO	Complete Overlap	h4b1	11.239	853.766	240.597	1674.322	18.187
Ecad MO CO	Complete Overlap	h4b1	11.239	907.805	217.258	1865.778	18.187
Ecad MO CO	Complete Overlap	h4b1	11.239	977.705	231.237	2034.168	18.187
Ecad MO CO	Complete Overlap	h4b1	11.239	975.238	261.732	2004.135	18.187
Ecad MO CO	Complete Overlap	h4b1	11.239	946.681	202.928	1969.603	18.187
Ecad MO CO	Complete Overlap	h4b1	11.563	944.897	357.714	2656.668	18.714
Ecad MO CO	Complete Overlap	h4b1	11.563	969.25	375.827	2235.427	18.714
Ecad MO CO	Complete Overlap	h4b1	11.563	895.09	358.807	2034.667	18.714
Ecad MO CO	Complete Overlap	h4b1	11.563	770.112	274.181	1870.702	18.714
Ecad MO CO	Complete Overlap
Ecad MO CO	Complete Overlap	h4b2	2.594	516.007	258.105	1079.847	4.129
Ecad MO CO	Complete Overlap	h4b2	2.594	615.207	306.466	1138.532	4.129
Ecad MO CO	Complete Overlap	h4b2	2.594	681.277	269.799	1138.261	4.129
Ecad MO CO	Complete Overlap	h4b2	2.594	796.088	241.077	1261.304	4.129
Ecad MO CO	Complete Overlap	h4b2	2.594	872.555	353.268	1516.058	4.129
Ecad MO CO	Complete Overlap	h4b2	2.594	876.928	346.465	1553.684	4.129
Ecad MO CO	Complete Overlap	h4b2	2.594	843.295	361.303	1478.967	4.129
Ecad MO CO	Complete Overlap	h4b2	2.594	746.151	348.977	1467.591	4.129
Ecad MO CO	Complete Overlap	h4b2	2.594	614.991	308.499	1221.248	4.129
Ecad MO CO	Complete Overlap
Ecad MO CO	Complete Overlap	h4b3	12.32	615.881	242.093	1420.572	19.944
Ecad MO CO	Complete Overlap	h4b3	12.32	664.36	214.746	1656.109	19.944
Ecad MO CO	Complete Overlap	h4b3	12.32	718.288	288.051	1824.023	19.944
Ecad MO CO	Complete Overlap	h4b3	12.32	698.342	274.413	1732.411	19.944
Ecad MO CO	Complete Overlap	h4b3	11.293	934.945	266.052	2153.399	18.275
Ecad MO CO	Complete Overlap	h4b3	11.293	922.813	272.977	1866.33	18.275
Ecad MO CO	Complete Overlap	h4b3	11.293	889.766	275.533	1938.323	18.275
Ecad MO CO	Complete Overlap	h4b3	11.293	793.194	326.256	1908.756	18.275
Ecad MO CO	Complete Overlap	h4b3	11.293	678.049	271.783	1831.899	18.275
Ecad MO CO	Complete Overlap	h4b3	11.293	564.767	208.893	1499.31	18.275
Ecad MO CO	Complete Overlap
Ecad MO CO	Complete Overlap	h4b4	7.078	589.972	198.056	1101.779	11.422
Ecad MO CO	Complete Overlap	h4b4	7.078	770.857	216.776	1484.601	11.422
Ecad MO CO	Complete Overlap	h4b4	7.078	854.772	192.935	1737.415	11.422
Ecad MO CO	Complete Overlap	h4b4	7.078	955.673	228.602	1971.925	11.422
Ecad MO CO	Complete Overlap	h4b4	7.078	984.461	225.639	2043.206	11.422
Ecad MO CO	Complete Overlap	h4b4	7.078	975.069	266.699	2151.051	11.422
Ecad MO CO	Complete Overlap	h4b4	7.078	909.066	261.451	1915.752	11.422
Ecad MO CO	Complete Overlap	h4b4	7.078	803.588	238.835	1852.363	11.422
Ecad MO CO	Complete Overlap	h4b4	7.078	669.385	307.118	1401.821	11.422
Ecad MO CO	Complete Overlap	h4b4	7.078	508.163	245.885	1010.19	11.422
Ecad MO CO	Complete Overlap	h5b1	12.968	936.425	251.895	1972.656	20.995
Ecad MO CO	Complete Overlap	h5b1	12.968	1042.813	290.317	2084.939	20.995
Ecad MO CO	Complete Overlap	h5b1	12.968	1048.885	363.035	1890.829	20.995
Ecad MO CO	Complete Overlap	h5b1	12.968	1038.312	325.407	1847.095	20.995
Ecad MO CO	Complete Overlap	h5b1	12.968	996.635	362.119	1904.783	20.995
Ecad MO CO	Complete Overlap	h5b1	12.968	952.405	325.161	2114.749	20.995
Ecad MO CO	Complete Overlap	h5b1	12.968	887.325	347.431	2011.646	20.995
Ecad MO CO	Complete Overlap	h5b1	12.968	829.133	374.11	1939.878	20.995
Ecad MO CO	Complete Overlap	h5b1	12.968	751.718	320.355	1861.644	20.995
Ecad MO CO	Complete Overlap
Ecad MO CO	Complete Overlap	h5b2	5.674	917.481	260.011	1988.017	9.137
Ecad MO CO	Complete Overlap	h5b2	5.674	973.254	266.611	2053.666	9.137
Ecad MO CO	Complete Overlap	h5b2	5.674	1002.727	285.429	1936.19	9.137
Ecad MO CO	Complete Overlap	h5b2	5.674	995.752	303.546	2134.895	9.137
Ecad MO CO	Complete Overlap	h5b2	5.674	970.515	345.065	1953.032	9.137
Ecad MO CO	Complete Overlap	h5b2	5.674	930.639	339.665	1658.959	9.137
Ecad MO CO	Complete Overlap	h5b2	5.674	880.705	315.196	1660.895	9.137
Ecad MO CO	Complete Overlap	h5b2	5.674	819.131	329.5	1704.434	9.137
Ecad MO CO	Complete Overlap	h5b2	5.674	744.123	347.282	1452.562	9.137
Ecad MO CO	Complete Overlap	h5b2	5.674	651.978	280.527	1481.138	9.137
Ecad MO CO	Complete Overlap
Ecad MO CO	Complete Overlap	h5b3	12.698	1008.905	263.189	2103.537	20.558
Ecad MO CO	Complete Overlap	h5b3	12.698	1070.08	217.315	2137.169	20.558
Ecad MO CO	Complete Overlap	h5b3	12.698	1076.546	275.46	2079.755	20.558
Ecad MO CO	Complete Overlap	h5b3	12.698	1045.746	292.09	1999.799	20.558
Ecad MO CO	Complete Overlap	h5b3	12.698	1004.295	305.322	2062.318	20.558
Ecad MO CO	Complete Overlap	h5b3	12.698	959.6	287.447	1874.787	20.558
Ecad MO CO	Complete Overlap	h5b3	12.698	897.925	266.558	2093.614	20.558
Ecad MO CO	Complete Overlap	h5b3	12.698	826.983	278.899	1937.643	20.558
Ecad MO CO	Complete Overlap	h5b3	12.698	737.136	252.612	1909.097	20.558
Ecad MO CO	Complete Overlap
Ecad MO CO	Complete Overlap	h5b4	3.404	1023.344	423.036	1610.667	5.447
Ecad MO CO	Complete Overlap	h5b4	3.404	1203.58	547.247	1969.522	5.447
Ecad MO CO	Complete Overlap	h5b4	3.404	1226.873	542.205	2020.007	5.447
Ecad MO CO	Complete Overlap	h5b4	3.404	1125.851	539.081	2282.817	5.447
Ecad MO CO	Complete Overlap	h5b4	3.404	1039.952	553.955	1746.858	5.447
Ecad MO CO	Complete Overlap	h5b4	3.404	902.257	494.385	1452.671	5.447
Ecad MO CO	Complete Overlap	h5b4	3.404	745.217	370.483	1270.483	5.447
Ecad MO CO	Complete Overlap	h5b4	3.404	587.104	281.685	1234.648	5.447
Ecad MO CO	Complete Overlap
Ecad MO CO	Complete Overlap	h5b5	8.321	698.28	249.639	1690.682	13.442
Ecad MO CO	Complete Overlap	h5b5	8.321	764.807	304.027	1898.71	13.442
Ecad MO CO	Complete Overlap	h5b5	8.321	773.958	320.976	1698.871	13.442
Ecad MO CO	Complete Overlap	h5b5	8.321	761.622	311.445	1715.211	13.442
Ecad MO CO	Complete Overlap	h5b5	8.321	712.483	358.424	1568.227	13.442
Ecad MO CO	Complete Overlap	h5b5	8.321	679.941	359.198	1426.234	13.442
Ecad MO CO	Complete Overlap	h5b5	8.321	642.331	298.782	1233.209	13.442
Ecad MO CO	Complete Overlap	h5b5	8.321	608.39	243.655	1029.673	13.442
Ecad MO CO	Complete Overlap	h6b1	7.403	543.35	181.411	1410.893	11.949
Ecad MO CO	Complete Overlap	h6b1	7.403	528.968	191.711	1312.723	11.949
Ecad MO CO	Complete Overlap	h6b1	7.403	480.475	207.896	1329.503	11.949
Ecad MO CO	Complete Overlap	h6b1	7.403	416.611	185.944	1147.109	11.949
Ecad MO CO	Complete Overlap	h6b1	7.403	347.136	157.895	1117.065	11.949
Ecad MO CO	Complete Overlap	h6b1	7.403	306.014	130.051	927.473	11.949
Ecad MO CO	Complete Overlap
Ecad MO CO	Complete Overlap	h6b2	9.078	346.294	115.377	914.3	14.672
Ecad MO CO	Complete Overlap	h6b2	9.078	346.294	115.377	914.3	14.672
Ecad MO CO	Complete Overlap	h6b2	9.078	346.294	115.377	914.3	14.672
Ecad MO CO	Complete Overlap	h6b2	9.078	403.92	130.909	1048.667	14.672
Ecad MO CO	Complete Overlap	h6b2	9.078	440.621	131.274	1091.22	14.672
Ecad MO CO	Complete Overlap	h6b2	9.078	473.391	148.433	1186.906	14.672
Ecad MO CO	Complete Overlap	h6b2	9.078	517.881	167.706	1156.527	14.672
Ecad MO CO	Complete Overlap	h6b2	9.078	545.668	160.757	1262.73	14.672
Ecad MO CO	Complete Overlap	h6b2	9.078	529.147	187.529	1237.859	14.672
Ecad MO CO	Complete Overlap
Ecad MO CO	Complete Overlap	h6b3	8.267	406.856	121.455	985.284	13.355
Ecad MO CO	Complete Overlap	h6b3	8.267	408.641	137.274	1058	13.355
Ecad MO CO	Complete Overlap	h6b3	8.267	392.265	136.289	1029.748	13.355
Ecad MO CO	Complete Overlap	h6b3	8.267	382.971	161.973	908.447	13.355
Ecad MO CO	Complete Overlap	h6b3	8.267	391.365	151.836	876.61	13.355
Ecad MO CO	Complete Overlap	h6b3	8.267	384.313	157.756	996.038	13.355
Ecad MO CO	Complete Overlap	h6b3	8.267	374.149	177.89	1025.019	13.355
Ecad MO CO	Complete Overlap
Ecad MO CO	Complete Overlap	h6b4	6.538	466.686	100.453	1380.624	10.543
Ecad MO CO	Complete Overlap	h6b4	6.538	467.2	99.642	1476.503	10.543
Ecad MO CO	Complete Overlap	h6b4	6.538	451.192	98.362	1325.057	10.543
Ecad MO CO	Complete Overlap	h6b4	6.538	429.885	101.138	1095.123	10.543
Ecad MO CO	Complete Overlap	h6b4	6.538	401.279	101.223	929.082	10.543
Ecad MO CO	Complete Overlap	h6b4	6.538	357.433	102.201	1007.295	10.543
Ecad MO CO	Complete Overlap
Ecad MO CO	Complete Overlap	h6b5	5.89	516.411	214.772	1142.92	9.489
Ecad MO CO	Complete Overlap	h6b5	5.89	603.393	224.762	1219.856	9.489
Ecad MO CO	Complete Overlap	h6b5	5.89	613.471	261.914	1172.088	9.489
Ecad MO CO	Complete Overlap	h6b5	5.89	613.239	279.223	1196.231	9.489
Ecad MO CO	Complete Overlap	h6b5	5.89	564.979	238.735	1399.25	9.489
Ecad MO CO	Complete Overlap	h6b5	5.89	443.547	219.097	980.334	9.489
Ecad MO CO	Complete Overlap
Ecad MO CO	Complete Overlap	h6b6	9.294	455.957	151.887	1194.007	15.024
Ecad MO CO	Complete Overlap	h6b6	9.294	472.544	159.468	1273.777	15.024
Ecad MO CO	Complete Overlap	h6b6	9.294	487.093	154.481	1243.592	15.024
Ecad MO CO	Complete Overlap	h6b6	9.294	461.734	186.718	948.1	15.024
Ecad MO CO	Complete Overlap	h6b6	9.294	414.297	191.059	1026.333	15.024
Ecad MO CO	Complete Overlap	h6b6	9.294	367.863	183.423	831.774	15.024
Ecad MO CO	Complete Overlap
Ecad MO CO	Complete Overlap	h6b7	6.16	353.427	150.518	836.111	9.928
Ecad MO CO	Complete Overlap	h6b7	6.16	363.143	147.896	852.936	9.928
Ecad MO CO	Complete Overlap	h6b7	6.16	422.596	171.769	1021.771	9.928
Ecad MO CO	Complete Overlap	h6b7	6.16	467.043	204.979	1098.413	9.928
Ecad MO CO	Complete Overlap	h6b7	6.16	469.544	212.875	1033.18	9.928
Ecad MO CO	Complete Overlap	h6b7	6.16	444.961	170.184	1153.821	9.928
Ecad MO CO	Complete Overlap	h6b7	6.16	418.665	183.151	1002.127	9.928
Ecad MO CO	Complete Overlap	h6b7	6.16	368.484	160.181	693.246	9.928
Ecad MO CO	Complete Overlap
Ecad MO CO	Complete Overlap	h6b8	7.349	439.847	137.087	1186.181	11.861
Ecad MO CO	Complete Overlap	h6b8	7.349	461.889	160.964	1208.778	11.861
Ecad MO CO	Complete Overlap	h6b8	7.349	485.648	185.018	1084.143	11.861
Ecad MO CO	Complete Overlap	h6b8	7.349	473.452	187.254	916.966	11.861
Ecad MO CO	Complete Overlap	h6b8	7.349	468.7	239.84	923.668	11.861
Ecad MO CO	Complete Overlap	h6b8	7.349	442.529	230.565	911.907	11.861
Ecad MO CO	Complete Overlap	h6b8	7.349	406.003	173.572	992.704	11.861
Ecad MO CO	Complete Overlap	h7b1	7.619	1833.352	782.265	3212.459	12.3
Ecad MO CO	Complete Overlap	h7b1	7.619	1869.004	808.855	3224.141	12.3
Ecad MO CO	Complete Overlap	h7b1	7.619	1746.236	762.082	3296.127	12.3
Ecad MO CO	Complete Overlap	h7b1	7.619	1530.651	727.349	2824.769	12.3
Ecad MO CO	Complete Overlap	h7b1	7.619	1341.5	588.795	3093.407	12.3
Ecad MO CO	Complete Overlap	h7b1	7.619	1195.588	486.831	3765.345	12.3
Ecad MO CO	Complete Overlap
Ecad MO CO	Complete Overlap	h7b2	8.754	1545.692	696.105	3115.197	14.145
Ecad MO CO	Complete Overlap	h7b2	8.754	1518.016	683.753	3417.573	14.145
Ecad MO CO	Complete Overlap	h7b2	8.754	1487.07	724.872	3326.713	14.145
Ecad MO CO	Complete Overlap	h7b2	8.754	1460.448	762.708	3312.118	14.145
Ecad MO CO	Complete Overlap
Ecad MO CO	Complete Overlap	h7b3	6.538	1476.208	685.553	2585.593	10.543
Ecad MO CO	Complete Overlap	h7b3	6.538	1785.424	794.673	3142.138	10.543
Ecad MO CO	Complete Overlap	h7b3	6.538	1864.973	845.805	3457.525	10.543
Ecad MO CO	Complete Overlap	h7b3	6.538	1858.141	907.064	3521.722	10.543
Ecad MO CO	Complete Overlap	h7b3	6.538	1686.367	771.543	3199.32	10.543
Ecad MO CO	Complete Overlap	h7b3	6.538	1371.704	584.163	2957.512	10.543
Ecad MO CO	Complete Overlap
Ecad MO CO	Complete Overlap	h7b4	9.564	1438.6	486.424	2878.264	15.463
Ecad MO CO	Complete Overlap	h7b4	9.564	1456.936	500.255	3246.428	15.463
Ecad MO CO	Complete Overlap	h7b4	9.564	1451.033	632.437	3581.711	15.463
Ecad MO CO	Complete Overlap	h7b4	9.564	1914.015	631.896	4095	15.463
Ecad MO CO	Complete Overlap	h7b4	9.564	1901.499	650.178	4095	15.463
Ecad MO CO	Complete Overlap	h7b4	9.564	1788.633	524.752	4070.874	15.463
Ecad MO CO	Complete Overlap	h7b4	9.564	1625.019	414.484	4050.057	15.463
Ecad MO CO	Complete Overlap	h7b4	9.564	1393.043	376.034	3342.368	15.463
Ecad MO CO	Complete Overlap
Ecad MO CO	Complete Overlap	h7b5	6.646	1534.567	645.094	2979.186	10.719
Ecad MO CO	Complete Overlap	h7b5	6.646	1522.525	740.692	2612.807	10.719
Ecad MO CO	Complete Overlap	h7b5	6.646	1432.048	553.953	2429.536	10.719
Ecad MO CO	Complete Overlap	h7b5	6.646	1282.063	637.469	2135.733	10.719
Ecad MO CO	Complete Overlap	h7b5	6.646	1154.893	554.532	2048.415	10.719
Ecad MO CO	Complete Overlap	h7b5	6.646	1024.332	486.623	2060.015	10.719
Ecad MO CO	Complete Overlap
Ecad MO CO	Complete Overlap	h7b6	10.158	1602.351	620.028	3060.947	16.429
Ecad MO CO	Complete Overlap	h7b6	10.158	1649.466	703.992	2981.702	16.429
Ecad MO CO	Complete Overlap	h7b6	10.158	1696.664	695.495	3324.567	16.429
Ecad MO CO	Complete Overlap	h7b6	10.158	1722.91	750.365	3302.478	16.429
Ecad MO CO	Complete Overlap	h7b6	10.158	1619.922	734.244	3828.997	16.429
Ecad MO CO	Complete Overlap	h7b6	10.158	1428.449	582.852	3389.073	16.429
Ecad MO CO	Complete Overlap	h8b1	8.591	540.099	216.544	1031.161	13.882
Ecad MO CO	Complete Overlap	h8b1	8.591	531.406	256.181	1018.717	13.882
Ecad MO CO	Complete Overlap	h8b1	8.591	492.563	196.462	1420.29	13.882
Ecad MO CO	Complete Overlap	h8b1	8.591	552.791	175.115	1512.034	13.882
Ecad MO CO	Complete Overlap	h8b1	8.591	586.246	239.802	1531.796	13.882
Ecad MO CO	Complete Overlap	h8b1	8.591	589.753	224.217	1480.869	13.882
Ecad MO CO	Complete Overlap	h8b1	8.591	563.434	221.057	1464.613	13.882
Ecad MO CO	Complete Overlap	h8b1	8.591	498.657	201.287	1620.898	13.882
Ecad MO CO	Complete Overlap	h8b1	8.591	409.076	177.466	1153.879	13.882
Ecad MO CO	Complete Overlap
Ecad MO CO	Complete Overlap	h8b2	11.185	422.272	143.959	1107.206	18.099
Ecad MO CO	Complete Overlap	h8b2	11.185	521.015	168.118	1527.49	18.099
Ecad MO CO	Complete Overlap	h8b2	11.185	539.327	164.178	1594.494	18.099
Ecad MO CO	Complete Overlap	h8b2	11.185	582.194	179.615	1542.565	18.099
Ecad MO CO	Complete Overlap	h8b2	11.185	609.526	176.131	1506.855	18.099
Ecad MO CO	Complete Overlap	h8b2	11.185	642.37	156.677	1298.168	18.099
Ecad MO CO	Complete Overlap	h8b2	11.185	653.934	229.399	1610.814	18.099
Ecad MO CO	Complete Overlap	h8b2	11.185	644.703	246.484	1893.252	18.099
Ecad MO CO	Complete Overlap	h8b2	11.185	612.647	237.16	1657.824	18.099
Ecad MO CO	Complete Overlap
Ecad MO CO	Complete Overlap	h8b3	7.781	705.372	286.825	1408.944	12.564
Ecad MO CO	Complete Overlap	h8b3	7.781	761.336	325.157	1416.134	12.564
Ecad MO CO	Complete Overlap	h8b3	7.781	800.49	301.967	1511.053	12.564
Ecad MO CO	Complete Overlap	h8b3	7.781	761.341	317.512	1707.614	12.564
Ecad MO CO	Complete Overlap	h8b3	7.781	697.798	297	1505.948	12.564
Ecad MO CO	Complete Overlap	h8b3	7.781	619.975	283.761	1424.826	12.564
Ecad MO CO	Complete Overlap	h8b3	7.781	519.581	164.737	1217.458	12.564
Ecad MO PO	Partial Overlap	h1b1	5.728	625.405	286.963	1247.756	9.225
Ecad MO PO	Partial Overlap	h1b1	5.728	642.114	281.904	1375.283	9.225
Ecad MO PO	Partial Overlap	h1b1	5.728	620.711	258.988	1179.299	9.225
Ecad MO PO	Partial Overlap	h1b1	5.728	596.387	303.317	1243.505	9.225
Ecad MO PO	Partial Overlap	h1b1	5.728	598.867	284.136	1204.091	9.225
Ecad MO PO	Partial Overlap	h1b1	5.728	603.413	274.213	1080.519	9.225
Ecad MO PO	Partial Overlap	h1b1	5.728	587.157	250.482	1302.022	9.225
Ecad MO PO	Partial Overlap	h1b1	5.728	545.615	198.433	1368.181	9.225
Ecad MO PO	Partial Overlap	h1b1	5.728	491.977	195.495	1389.161	9.225
Ecad MO PO	Partial Overlap
Ecad MO PO	Partial Overlap	h1b2	20.371	673.264	181.903	1983.048	33.035
Ecad MO PO	Partial Overlap	h1b2	20.371	730.149	230.341	1983.141	33.035
Ecad MO PO	Partial Overlap	h1b2	20.371	777.33	206.64	2286.117	33.035
Ecad MO PO	Partial Overlap	h1b2	20.371	764.314	266.234	1968.91	33.035
Ecad MO PO	Partial Overlap	h1b2	20.371	732.191	215.939	1715.54	33.035
Ecad MO PO	Partial Overlap	h1b2	20.371	698.419	193.08	1606.858	33.035
Ecad MO PO	Partial Overlap	h1b2	20.371	649.078	180.43	1546.482	33.035
Ecad MO PO	Partial Overlap	h1b2	20.371	577.936	185.05	1544.02	33.035
Ecad MO PO	Partial Overlap	h1b2	20.371	519.808	159.008	1313.169	33.035
Ecad MO PO	Partial Overlap	h1b2	9.132	525.855	169.411	1575.014	14.76
Ecad MO PO	Partial Overlap	h1b2	9.132	501.829	170.279	1543.074	14.76
Ecad MO PO	Partial Overlap	h1b2	9.132	447.199	143.144	1365.541	14.76
Ecad MO PO	Partial Overlap
Ecad MO PO	Partial Overlap	h1b3	12.374	759.706	186.652	1881.008	20.032
Ecad MO PO	Partial Overlap	h1b3	12.374	878.7	182.446	1744.256	20.032
Ecad MO PO	Partial Overlap	h1b3	12.374	946.314	245.639	1941.849	20.032
Ecad MO PO	Partial Overlap	h1b3	12.374	892.002	292.502	2053.285	20.032
Ecad MO PO	Partial Overlap	h1b3	12.374	776.177	254.338	1859.077	20.032
Ecad MO PO	Partial Overlap	h1b3	12.374	684.56	259.686	1713.554	20.032
Ecad MO PO	Partial Overlap	h1b3	12.374	621.161	261.153	1467.556	20.032
Ecad MO PO	Partial Overlap	h1b3	12.374	576.202	239.69	1402.376	20.032
Ecad MO PO	Partial Overlap	h2b1	11.131	590.601	187.671	1393.051	18.011
Ecad MO PO	Partial Overlap	h2b1	11.131	722.764	245.798	2035.499	18.011
Ecad MO PO	Partial Overlap	h2b1	11.131	809.26	276.97	2007.681	18.011
Ecad MO PO	Partial Overlap	h2b1	11.131	880.133	273.775	2271.364	18.011
Ecad MO PO	Partial Overlap	h2b1	11.131	872.119	320.933	2251.86	18.011
Ecad MO PO	Partial Overlap	h2b1	11.131	745.579	270.809	1923.304	18.011
Ecad MO PO	Partial Overlap	h2b1	11.131	624.657	226.653	1891.608	18.011
Ecad MO PO	Partial Overlap
Ecad MO PO	Partial Overlap	h2b2	7.565	708.37	262.443	1636.307	12.212
Ecad MO PO	Partial Overlap	h2b2	7.565	746.453	300.07	1608.083	12.212
Ecad MO PO	Partial Overlap	h2b2	7.565	758.375	284.339	1534.612	12.212
Ecad MO PO	Partial Overlap	h2b2	7.565	668.195	268.571	1382.665	12.212
Ecad MO PO	Partial Overlap	h2b2	7.565	510.43	237.797	1178.747	12.212
Ecad MO PO	Partial Overlap	h4b1	8.862	663.949	201.998	1290.639	14.321
Ecad MO PO	Partial Overlap	h4b1	8.862	837.469	205.684	1873.773	14.321
Ecad MO PO	Partial Overlap	h4b1	8.862	914.993	213.033	2011.282	14.321
Ecad MO PO	Partial Overlap	h4b1	8.862	980.676	213.55	2228.392	14.321
Ecad MO PO	Partial Overlap	h4b1	8.862	948.454	258.831	2048.632	14.321
Ecad MO PO	Partial Overlap	h4b1	8.862	839.29	275.473	1887.238	14.321
Ecad MO PO	Partial Overlap	h4b1	7.835	1110.024	326.152	2404.449	12.652
Ecad MO PO	Partial Overlap	h4b1	7.835	1039.204	351.626	2640.765	12.652
Ecad MO PO	Partial Overlap	h4b1	7.835	896.51	298.661	2570.977	12.652
Ecad MO PO	Partial Overlap	h4b1	7.835	712.265	256.061	1773.475	12.652
Ecad MO PO	Partial Overlap	h4b1	7.835	538.093	218.37	1068.942	12.652
Ecad MO PO	Partial Overlap
Ecad MO PO	Partial Overlap	h4b2	10.807	709.71	217.221	1644.149	17.484
Ecad MO PO	Partial Overlap	h4b2	10.807	756.883	213.263	1948.851	17.484
Ecad MO PO	Partial Overlap	h4b2	10.807	780.205	206.101	1822.371	17.484
Ecad MO PO	Partial Overlap	h4b2	10.807	774.28	245.57	1905.707	17.484
Ecad MO PO	Partial Overlap	h4b2	10.807	741.427	288.953	1759.6	17.484
Ecad MO PO	Partial Overlap	h4b2	10.807	691.371	243.289	1733.196	17.484
Ecad MO PO	Partial Overlap	h4b2	10.807	631.942	274.771	1236.404	17.484
Ecad MO PO	Partial Overlap	h4b2	10.807	559.51	207.826	1372.606	17.484
Ecad MO PO	Partial Overlap
Ecad MO PO	Partial Overlap	h4b3	7.781	760.536	253.432	1524.996	12.564
Ecad MO PO	Partial Overlap	h4b3	7.781	792.773	235.153	1675.883	12.564
Ecad MO PO	Partial Overlap	h4b3	7.781	855.743	226.608	1730.79	12.564
Ecad MO PO	Partial Overlap	h4b3	7.781	850.104	252.448	1698.016	12.564
Ecad MO PO	Partial Overlap	h4b3	7.781	848.401	286.1	2006.778	12.564
Ecad MO PO	Partial Overlap	h4b3	7.781	841.21	303.05	1909.359	12.564
Ecad MO PO	Partial Overlap	h4b3	7.781	816.064	309.662	1797.069	12.564
Ecad MO PO	Partial Overlap	h4b3	7.781	841.547	312.347	1825.94	12.564
Ecad MO PO	Partial Overlap	h5b1	10.591	895.16	222.31	2211.677	17.132
Ecad MO PO	Partial Overlap	h5b1	10.591	958.953	261.373	2562.796	17.132
Ecad MO PO	Partial Overlap	h5b1	10.591	954.719	266.247	2159.685	17.132
Ecad MO PO	Partial Overlap	h5b1	10.591	903.475	283.464	2108.342	17.132
Ecad MO PO	Partial Overlap	h5b1	10.591	847.24	306.079	2030.394	17.132
Ecad MO PO	Partial Overlap	h5b1	10.591	765.968	334.622	1745.232	17.132
Ecad MO PO	Partial Overlap	h5b1	10.591	682.808	297.722	1351.185	17.132
Ecad MO PO	Partial Overlap
Ecad MO PO	Partial Overlap	h5b2	14.373	1063.683	356.431	2427.406	23.283
Ecad MO PO	Partial Overlap	h5b2	14.373	1204.363	376.662	2530.166	23.283
Ecad MO PO	Partial Overlap	h5b2	14.373	1254.368	508.079	2597.106	23.283
Ecad MO PO	Partial Overlap	h5b2	14.373	1204.584	526.298	2628.087	23.283
Ecad MO PO	Partial Overlap	h5b2	14.373	1119.23	498.711	2447.544	23.283
Ecad MO PO	Partial Overlap	h5b2	14.373	1018.877	454.215	2283.567	23.283
Ecad MO PO	Partial Overlap	h5b2	14.373	894.103	435.131	2040.73	23.283
Ecad MO PO	Partial Overlap
Ecad MO PO	Partial Overlap	h5b3	12.212	1283.658	425.989	2564.907	19.768
Ecad MO PO	Partial Overlap	h5b3	12.212	1341.038	452.878	2495.825	19.768
Ecad MO PO	Partial Overlap	h5b3	12.212	1340.235	515.595	2418.067	19.768
Ecad MO PO	Partial Overlap	h5b3	12.212	1300.205	496.695	2257.191	19.768
Ecad MO PO	Partial Overlap	h5b3	12.212	1233.228	506.718	2166.913	19.768
Ecad MO PO	Partial Overlap	h5b3	12.212	1100.647	510.791	2127.813	19.768
Ecad MO PO	Partial Overlap	h5b3	12.212	955.976	438.034	1985.092	19.768
Ecad MO PO	Partial Overlap	h6b1	7.511	435.751	153.206	1154.738	12.124
Ecad MO PO	Partial Overlap	h6b1	7.511	438.52	179.422	1126.689	12.124
Ecad MO PO	Partial Overlap	h6b1	7.511	426.19	195.61	862.853	12.124
Ecad MO PO	Partial Overlap	h6b1	7.511	434.576	206.735	917.375	12.124
Ecad MO PO	Partial Overlap	h6b1	7.511	439.575	196.714	1004.69	12.124
Ecad MO PO	Partial Overlap	h6b1	7.511	425.721	152.834	870.735	12.124
Ecad MO PO	Partial Overlap
Ecad MO PO	Partial Overlap	h6b2	7.565	638.073	263.098	1326.163	12.212
Ecad MO PO	Partial Overlap	h6b2	7.565	645.751	287.465	1275.836	12.212
Ecad MO PO	Partial Overlap	h6b2	7.565	569.743	234.764	1010.405	12.212
Ecad MO PO	Partial Overlap	h6b2	7.565	478.701	227.32	897.513	12.212
Ecad MO PO	Partial Overlap	h6b2	7.565	396.335	188.988	973.227	12.212
Ecad MO PO	Partial Overlap	h6b2	7.565	316.355	154.603	720.164	12.212
Ecad MO PO	Partial Overlap	h6b2	7.565	264.048	121.056	527.103	12.212
Ecad MO PO	Partial Overlap
Ecad MO PO	Partial Overlap	h6b3	10.807	673.357	259.492	1430.812	17.484
Ecad MO PO	Partial Overlap	h6b3	10.807	774.323	269.493	1699.004	17.484
Ecad MO PO	Partial Overlap	h6b3	10.807	817.98	312.531	1870.999	17.484
Ecad MO PO	Partial Overlap	h6b3	10.807	783.934	291.98	1641.583	17.484
Ecad MO PO	Partial Overlap
Ecad MO PO	Partial Overlap	h6b4	11.239	311.234	97.17	905.675	18.187
Ecad MO PO	Partial Overlap	h6b4	11.239	352.126	98.777	1086.686	18.187
Ecad MO PO	Partial Overlap	h6b4	11.239	370.083	104.275	1243.385	18.187
Ecad MO PO	Partial Overlap	h6b4	11.239	386.416	100.903	1115.227	18.187
Ecad MO PO	Partial Overlap	h6b4	11.239	400.965	127.373	1179.606	18.187
Ecad MO PO	Partial Overlap	h6b4	11.239	401.721	127.44	1120.208	18.187
Ecad MO PO	Partial Overlap	h6b4	11.239	373.991	151.822	935.923	18.187
Ecad MO PO	Partial Overlap	h6b4	11.239	342.803	158.632	659.958	18.187
Ecad MO PO	Partial Overlap
Ecad MO PO	Partial Overlap	h6b5	6.7	534.71	171.478	1234.77	10.807
Ecad MO PO	Partial Overlap	h6b5	6.7	535.89	162.509	1286.712	10.807
Ecad MO PO	Partial Overlap	h6b5	6.7	531.89	158.743	1246.147	10.807
Ecad MO PO	Partial Overlap	h6b5	6.7	488.086	163.942	1100.706	10.807
Ecad MO PO	Partial Overlap	h6b5	6.7	408.507	139.79	880.24	10.807
Ecad MO PO	Partial Overlap	h7b1	5.133	1649.264	749.53	3639.912	8.258
Ecad MO PO	Partial Overlap	h7b1	5.133	1769.548	789.293	3624.56	8.258
Ecad MO PO	Partial Overlap	h7b1	5.133	1781.875	899.485	3126.775	8.258
Ecad MO PO	Partial Overlap	h7b1	5.133	1690.945	745.239	3230.467	8.258
Ecad MO PO	Partial Overlap	h7b1	5.133	1532.232	655.652	2807.841	8.258
Ecad MO PO	Partial Overlap	h7b1	5.133	1345.065	521.944	2631.932	8.258
Ecad MO PO	Partial Overlap
Ecad MO PO	Partial Overlap	h7b2	8.213	1298.628	592.657	2737.252	13.267
Ecad MO PO	Partial Overlap	h7b2	8.213	1358.326	630.6	2523.935	13.267
Ecad MO PO	Partial Overlap	h7b2	8.213	1327.385	690.453	2947.864	13.267
Ecad MO PO	Partial Overlap	h7b2	8.213	1185.919	599.228	3376.353	13.267
Ecad MO PO	Partial Overlap	h7b2	8.213	1023.51	467.04	3129.764	13.267
Ecad MO PO	Partial Overlap
Ecad MO PO	Partial Overlap	h7b3	7.295	1851.631	719.662	3060.4	11.773
Ecad MO PO	Partial Overlap	h7b3	7.295	1807.742	860.085	3060.315	11.773
Ecad MO PO	Partial Overlap	h7b3	7.295	1661.017	788.501	2859.833	11.773
Ecad MO PO	Partial Overlap	h7b3	7.295	1493.223	634.664	2766.408	11.773
Ecad MO PO	Partial Overlap	h7b3	7.295	1334.153	572.126	3154.321	11.773
Ecad MO PO	Partial Overlap	h7b3	7.295	1205.252	447.089	3786.318	11.773
Ecad MO PO	Partial Overlap
Ecad MO PO	Partial Overlap	h7b4	9.78	1994.024	707.654	3924.663	15.814
Ecad MO PO	Partial Overlap	h7b4	9.78	1979.506	706.963	3795.495	15.814
Ecad MO PO	Partial Overlap	h7b4	9.78	1775.242	669.94	3893.871	15.814
Ecad MO PO	Partial Overlap	h7b4	10.591	2005.151	888.611	3946.306	17.132
Ecad MO PO	Partial Overlap	h7b4	10.591	1905.917	747.052	3972.463	17.132
Ecad MO PO	Partial Overlap	h7b4	10.591	1583.444	586.247	3276.157	17.132
Ecad MO PO	Partial Overlap	h7b4	10.591	1211.398	523.861	2450.329	17.132
Ecad MO PO	Partial Overlap	h8b1	9.348	578.206	182.578	1159.243	15.112
Ecad MO PO	Partial Overlap	h8b1	9.348	586.92	213.485	1195.439	15.112
Ecad MO PO	Partial Overlap	h8b1	9.348	566.119	228.983	1085.722	15.112
Ecad MO PO	Partial Overlap	h8b1	9.348	538.338	254.711	1292.408	15.112
Ecad MO PO	Partial Overlap	h8b1	9.348	523.624	229.826	1407.965	15.112
Ecad MO PO	Partial Overlap	h8b1	9.348	523.295	234.824	1495.145	15.112
Ecad MO PO	Partial Overlap	h8b1	9.348	512.762	206.339	1563.748	15.112
Ecad MO PO	Partial Overlap	h8b1	9.348	455.239	204.252	1470.673	15.112
Ecad MO PO	Partial Overlap
Ecad MO PO	Partial Overlap	h8b2	8.808	724.375	280.851	1342.415	14.233
Ecad MO PO	Partial Overlap	h8b2	8.808	731.803	324.351	1378.722	14.233
Ecad MO PO	Partial Overlap	h8b2	8.808	676.558	287.168	1514.031	14.233
Ecad MO PO	Partial Overlap	h8b2	8.808	621.417	224.434	1434.742	14.233
Ecad MO PO	Partial Overlap	h8b2	8.862	786.173	219.814	2268.876	14.321
Ecad MO PO	Partial Overlap	h8b2	8.862	687.856	242.686	2215.379	14.321
Ecad MO PO	Partial Overlap
Ecad MO PO	Partial Overlap
Ecad MO PO	Partial Overlap	h8b3	9.51	716.328	262.961	1655.078	15.375
Ecad MO PO	Partial Overlap	h8b3	9.51	735.17	296.426	1746.125	15.375
Ecad MO PO	Partial Overlap	h8b3	9.51	699.911	272.54	1315.134	15.375
Ecad MO PO	Partial Overlap	h8b3	9.51	629.775	240.777	1173.989	15.375
Ecad MO PO	Partial Overlap	h8b3	9.51	564.354	234.38	1224.493	15.375
Ecad MO PO	Partial Overlap	h8b3	9.51	519.3	243.59	1126.181	15.375
Ecad MO PO	Partial Overlap	h8b3	9.51	469.788	206.991	1126.012	15.375
Ecad MO PO	Partial Overlap
Ecad MO PO	Partial Overlap	h8b4	11.401	564.749	202.826	1376.712	18.45
Ecad MO PO	Partial Overlap	h8b4	11.401	582.914	234.388	1360.25	18.45
Ecad MO PO	Partial Overlap	h8b4	11.725	708.228	197.407	1640.939	18.977
Ecad MO PO	Partial Overlap	h8b4	11.725	739.614	245.473	1701.082	18.977
Ecad MO PO	Partial Overlap	h8b4	11.725	718.915	247.858	1758.502	18.977
Ecad MO PO	Partial Overlap	h8b4	11.725	664.734	218.498	1853.465	18.977
Ecad MO PO	Partial Overlap	h8b4	11.725	585.727	218.153	1458.64	18.977
Ecad MO PO	Partial Overlap
Ecad MO PO	Partial Overlap	h8b5	10.537	674.349	181.814	1508.086	17.043
Ecad MO PO	Partial Overlap	h8b5	10.537	758.846	156.333	1619.828	17.043
Ecad MO PO	Partial Overlap	h8b5	10.537	852.152	214.156	1828.226	17.043
Ecad MO PO	Partial Overlap	h8b5	10.537	917.427	231.225	2173.46	17.043
Ecad MO PO	Partial Overlap	h8b5	10.537	898.928	249.943	2174.921	17.043
Ecad MO PO	Partial Overlap	h8b5	10.537	843.605	282.34	1808.107	17.043
Ecad MO PO	Partial Overlap	h8b5	10.537	714.577	290.002	1548.581	17.043
Ecad MO PO	Partial Overlap
Ecad MO PO	Partial Overlap	h8b6	11.833	470.572	158.659	1396.83	19.153
Ecad MO PO	Partial Overlap	h8b6	11.833	490.042	176.05	1362.41	19.153
Ecad MO PO	Partial Overlap	h8b6	11.833	506.319	185.752	1640.167	19.153
Ecad MO PO	Partial Overlap	h8b6	11.779	586.737	168.104	1497.543	19.065
Ecad MO PO	Partial Overlap	h8b6	11.779	574.791	194.109	1493.17	19.065
Ecad MO PO	Partial Overlap	h8b6	11.779	536.975	187.126	1786.469	19.065
Ecad MO PO	Partial Overlap	h8b6	11.779	503.045	167.637	1782.804	19.065
Ecad MO PO	Partial Overlap
Ecad MO PO	Partial Overlap	h8b9	10.321	481.742	134.819	1176.685	16.693
Ecad MO PO	Partial Overlap	h8b9	10.321	483.724	139.624	1277.944	16.693
Ecad MO PO	Partial Overlap	h8b9	10.321	455.915	185.504	1072.976	16.693
Ecad MO PO	Partial Overlap	h8b9	10.321	458.673	200.21	1116.709	16.693
Ecad MO PO	Partial Overlap	h8b9	10.321	450.772	223.133	1151.348	16.693
Ecad MO PO	Partial Overlap	h8b9	10.321	443.528	192.962	1110.353	16.693
Ecad MO PO	Partial Overlap	h8b9	10.321	432.564	185.782	995.589	16.693
Ecad MO NO	No Overlap	h1b1	9.024	637.056	156.618	1528.343	14.584
Ecad MO NO	No Overlap	h1b1	9.024	617.097	187.961	1367.964	14.584
Ecad MO NO	No Overlap	h1b1	9.024	576.292	179.544	1358.534	14.584
Ecad MO NO	No Overlap	h1b1	8.754	749.831	217.138	1453.636	14.145
Ecad MO NO	No Overlap	h1b1	8.754	658.349	222.201	1262.951	14.145
Ecad MO NO	No Overlap	h1b1	8.754	595.719	226.744	1241.103	14.145
Ecad MO NO	No Overlap	h1b1	8.754	553.542	228.467	1174.68	14.145
Ecad MO NO	No Overlap	h1b1	8.754	523.217	166.121	1242.867	14.145
Ecad MO NO	No Overlap	h1b1	8.754	506.846	178.203	1409.145	14.145
Ecad MO NO	No Overlap	h1b1	8.754	482.807	175.629	1182.704	14.145
Ecad MO NO	No Overlap
Ecad MO NO	No Overlap	h1b2	7.187	622.23	222.74	1313.525	11.597
Ecad MO NO	No Overlap	h1b2	7.187	660.102	230.001	1453.368	11.597
Ecad MO NO	No Overlap	h1b2	7.187	671.821	239.368	1541.461	11.597
Ecad MO NO	No Overlap	h1b2	7.187	651.715	232.725	1339.699	11.597
Ecad MO NO	No Overlap	h1b2	7.187	617.016	248.714	1208.801	11.597
Ecad MO NO	No Overlap	h1b2	7.187	576.236	262.934	1111.233	11.597
Ecad MO NO	No Overlap	h1b2	7.187	539.751	263.584	1145.189	11.597
Ecad MO NO	No Overlap
Ecad MO NO	No Overlap	h1b3	17.399	695.656	302.629	1460.029	28.203
Ecad MO NO	No Overlap	h1b3	17.399	630.862	255.163	1409.011	28.203
Ecad MO NO	No Overlap	h1b3	17.399	591.76	245.997	1254.472	28.203
Ecad MO NO	No Overlap	h1b3	17.399	561.67	238.958	1099.409	28.203
Ecad MO NO	No Overlap	h1b3	17.399	533.899	228.286	1053.203	28.203
Ecad MO NO	No Overlap	h1b3	17.399	506.731	234.036	997.291	28.203
Ecad MO NO	No Overlap
Ecad MO NO	No Overlap	h1b4	7.565	460.385	166.941	1283.617	12.212
Ecad MO NO	No Overlap	h1b4	7.565	482.184	178.19	1136.445	12.212
Ecad MO NO	No Overlap	h1b4	7.565	481.652	178.746	941.539	12.212
Ecad MO NO	No Overlap	h1b4	7.565	489.746	193.926	1097.179	12.212
Ecad MO NO	No Overlap	h1b4	7.565	497.033	208.134	1131.523	12.212
Ecad MO NO	No Overlap	h1b4	7.565	505.237	226.051	1106.506	12.212
Ecad MO NO	No Overlap	h1b4	7.565	515.1	222.124	1098.718	12.212
Ecad MO NO	No Overlap	h1b4	7.565	529.331	221.479	1062.795	12.212
Ecad MO NO	No Overlap	h1b4	7.565	517.779	246.212	1144.636	12.212
Ecad MO NO	No Overlap
Ecad MO NO	No Overlap	h1b5	8.862	640.353	186.106	1768.688	14.321
Ecad MO NO	No Overlap	h1b5	8.862	733.096	194.224	2084.924	14.321
Ecad MO NO	No Overlap	h1b5	8.862	796.317	205.959	2352.839	14.321
Ecad MO NO	No Overlap	h1b5	8.862	787.636	240.406	2573.435	14.321
Ecad MO NO	No Overlap	h1b5	8.862	742.086	270.551	2294.001	14.321
Ecad MO NO	No Overlap	h1b5	8.862	737.384	259.535	1954.196	14.321
Ecad MO NO	No Overlap
Ecad MO NO	No Overlap	h1b6	7.457	1084.788	368.397	2220.615	12.028
Ecad MO NO	No Overlap	h1b6	7.457	1152.35	378.945	2508.093	12.028
Ecad MO NO	No Overlap	h1b6	7.457	1089.778	355.032	2019.546	12.028
Ecad MO NO	No Overlap	h1b6	7.457	985.2	344.728	1921.271	12.028
Ecad MO NO	No Overlap
Ecad MO NO	No Overlap
Ecad MO NO	No Overlap
Ecad MO NO	No Overlap
Ecad MO NO	No Overlap	h2b1	8.105	687.045	256.944	1502.863	13.091
Ecad MO NO	No Overlap	h2b1	8.105	775.811	288.092	1816.322	13.091
Ecad MO NO	No Overlap	h2b1	8.105	798.124	328.191	1762.359	13.091
Ecad MO NO	No Overlap	h2b1	8.105	767.988	300.39	1594.302	13.091
Ecad MO NO	No Overlap	h2b1	8.105	706.633	343.013	1354.368	13.091
Ecad MO NO	No Overlap
Ecad MO NO	No Overlap	h2b2	7.078	587.975	187.388	1253.801	11.422
Ecad MO NO	No Overlap	h2b2	7.078	676.552	185.354	1419.833	11.422
Ecad MO NO	No Overlap	h2b2	7.078	700.286	198.88	1377.803	11.422
Ecad MO NO	No Overlap	h2b2	7.078	669.568	231.353	1304.036	11.422
Ecad MO NO	No Overlap	h2b2	7.078	599.42	258.822	1191.391	11.422
Ecad MO NO	No Overlap	h2b2	7.078	538.888	272.599	1072.935	11.422
Ecad MO NO	No Overlap
Ecad MO NO	No Overlap	h2b3	12.698	619.548	214.612	1266.349	20.559
Ecad MO NO	No Overlap	h2b3	12.698	692.93	294.134	1527.642	20.559
Ecad MO NO	No Overlap	h2b3	12.698	705.096	273.471	1570.658	20.559
Ecad MO NO	No Overlap	h2b3	12.698	684.096	288.7	1476.104	20.559
Ecad MO NO	No Overlap	h2b3	12.698	614.27	273.239	1112.076	20.559
Ecad MO NO	No Overlap	h2b3	12.698	521.683	252.605	1147.089	20.559
Ecad MO NO	No Overlap	h3b1	12.59	547.55	173.192	1242.695	20.383
Ecad MO NO	No Overlap	h3b1	12.59	589.596	184.75	1409.412	20.383
Ecad MO NO	No Overlap	h3b1	12.59	591.613	217.992	1473.829	20.383
Ecad MO NO	No Overlap	h3b1	12.59	558.791	200.746	1616.452	20.383
Ecad MO NO	No Overlap	h3b1	12.59	420.985	198.634	1489.407	20.383
Ecad MO NO	No Overlap
Ecad MO NO	No Overlap	h3b2	15.994	585.179	211.379	1327.117	25.918
Ecad MO NO	No Overlap	h3b2	15.994	542.785	210.961	1160.959	25.918
Ecad MO NO	No Overlap	h3b2	15.994	525.844	238.036	1212.226	25.918
Ecad MO NO	No Overlap	h3b2	15.994	505.544	207.23	1449.49	25.918
Ecad MO NO	No Overlap	h3b2	15.994	377.021	177.876	1597.623	25.918
Ecad MO NO	No Overlap
Ecad MO NO	No Overlap	h3b3	8.7	1000.597	452.437	1935.827	14.057
Ecad MO NO	No Overlap	h3b3	8.7	906.515	414.6	2107.053	14.057
Ecad MO NO	No Overlap	h3b3	8.7	793.359	326.723	1986.441	14.057
Ecad MO NO	No Overlap	h3b3	8.7	566.561	284.687	1606.798	14.057
Ecad MO NO	No Overlap
Ecad MO NO	No Overlap	h3b4	8.754	1191.503	552.157	2200.247	14.145
Ecad MO NO	No Overlap	h3b4	8.754	1294.774	517.919	2499.242	14.145
Ecad MO NO	No Overlap	h3b4	8.754	1190.13	619.082	1943.732	14.145
Ecad MO NO	No Overlap	h3b4	8.754	950.187	513.29	1698.162	14.145
Ecad MO NO	No Overlap
Ecad MO NO	No Overlap	h3b5	10.591	626.072	214.867	1292.539	17.132
Ecad MO NO	No Overlap	h3b5	10.591	847.027	238.981	2161.583	17.132
Ecad MO NO	No Overlap	h3b5	10.591	983.003	268.17	2273.334	17.132
Ecad MO NO	No Overlap	h3b5	5.782	1056.347	347.519	1933.891	9.313
Ecad MO NO	No Overlap	h3b5	5.782	1117.576	430.202	2068.605	9.313
Ecad MO NO	No Overlap	h3b5	5.782	1037.914	422.364	1850.079	9.313
Ecad MO NO	No Overlap
Ecad MO NO	No Overlap	h3b6	8.645	624.159	225.804	1098.781	13.97
Ecad MO NO	No Overlap	h3b6	8.645	844.694	294.206	1662.799	13.97
Ecad MO NO	No Overlap	h3b6	8.645	1013.321	314.183	2074.516	13.97
Ecad MO NO	No Overlap
Ecad MO NO	No Overlap	h3b7	7.024	542.504	241.283	1153.801	11.334
Ecad MO NO	No Overlap	h3b7	7.024	720.756	361.329	1324.015	11.334
Ecad MO NO	No Overlap	h3b7	7.024	817.175	355.169	1518.015	11.334
Ecad MO NO	No Overlap	h3b7	7.024	675.71	356.389	1701.745	11.334
Ecad MO NO	No Overlap
Ecad MO NO	No Overlap
Ecad MO NO	No Overlap
Ecad MO NO	No Overlap
Ecad MO NO	No Overlap
Ecad MO NO	No Overlap
Ecad MO NO	No Overlap
Ecad MO NO	No Overlap
Ecad MO NO	No Overlap
Ecad MO NO	No Overlap
Ecad MO NO	No Overlap
Ecad MO NO	No Overlap
Ecad MO NO	No Overlap
Ecad MO NO	No Overlap
Ecad MO NO	No Overlap	h4b1	7.619	543.017	204.81	1353.826	12.3
Ecad MO NO	No Overlap	h4b1	7.619	594.687	197.5	1425.696	12.3
Ecad MO NO	No Overlap	h4b1	7.619	661.15	219.959	2089.988	12.3
Ecad MO NO	No Overlap	h4b1	7.619	663.069	253.36	2179.145	12.3
Ecad MO NO	No Overlap	h4b1	7.295	934.051	320.251	2188.525	11.773
Ecad MO NO	No Overlap	h4b1	7.295	994.03	353.91	2290.858	11.773
Ecad MO NO	No Overlap	h4b1	7.295	1012.737	393.966	2333.054	11.773
Ecad MO NO	No Overlap	h4b1	7.295	750.61	413.299	1925.022	11.773
Ecad MO NO	No Overlap
Ecad MO NO	No Overlap	h4b2	8.645	929.093	223.579	2180.47	13.97
Ecad MO NO	No Overlap	h4b2	8.645	1054.613	326.76	2358.185	13.97
Ecad MO NO	No Overlap	h4b2	8.645	1144.446	337.789	2522.009	13.97
Ecad MO NO	No Overlap	h4b2	8.645	1212.253	350.629	2642.075	13.97
Ecad MO NO	No Overlap	h4b2	8.645	1210.412	426.461	2779.953	13.97
Ecad MO NO	No Overlap
Ecad MO NO	No Overlap	h4b3	13.13	846.994	247.338	2060.83	21.262
Ecad MO NO	No Overlap	h4b3	13.13	932.233	196.981	2394.322	21.262
Ecad MO NO	No Overlap	h4b3	13.13	1039.149	208.666	2655.34	21.262
Ecad MO NO	No Overlap	h4b3	13.13	1143.501	279.972	2777.594	21.262
Ecad MO NO	No Overlap	h4b3	13.13	1190.823	231.566	3003.375	21.262
Ecad MO NO	No Overlap
Ecad MO NO	No Overlap	h4b4	11.293	999.971	320.189	2232.128	18.275
Ecad MO NO	No Overlap	h4b4	11.293	1087.087	282.759	2522.037	18.275
Ecad MO NO	No Overlap	h4b4	11.293	1124.479	285.204	2765.596	18.275
Ecad MO NO	No Overlap	h4b4	11.293	1076.479	329.859	2673.046	18.275
Ecad MO NO	No Overlap	h4b4	11.293	995.093	333.699	2623.514	18.275
Ecad MO NO	No Overlap
Ecad MO NO	No Overlap	h4b5	11.671	938.065	254.781	1947.095	18.89
Ecad MO NO	No Overlap	h4b5	11.671	997.937	323.999	2002.61	18.89
Ecad MO NO	No Overlap	h4b5	11.671	947.869	304.189	2193.877	18.89
Ecad MO NO	No Overlap	h4b5	11.671	835.851	369.199	1808.444	18.89
Ecad MO NO	No Overlap	h4b5	11.671	800.112	362.93	1687.7	18.89
Ecad MO NO	No Overlap	h4b5	11.671	790.088	342.673	1681.983	18.89
Ecad MO NO	No Overlap	h4b5	11.671	800.083	344.292	1673.919	18.89
Ecad MO NO	No Overlap	h5b1	11.888	855.357	238.411	1788.973	19.241
Ecad MO NO	No Overlap	h5b1	11.888	978.092	312.444	2103.688	19.241
Ecad MO NO	No Overlap	h5b1	11.888	1039.956	340.563	2184.073	19.241
Ecad MO NO	No Overlap	h5b1	11.888	1010.064	389.953	2365.067	19.241
Ecad MO NO	No Overlap	h5b1	11.888	931.893	361.378	2452.305	19.241
Ecad MO NO	No Overlap	h5b1	11.888	864.949	332.754	2075.563	19.241
Ecad MO NO	No Overlap	h5b1	11.888	567.909	292.731	1949.035	19.241
Ecad MO NO	No Overlap
Ecad MO NO	No Overlap	h5b2	11.347	647.676	220.221	1437.765	18.362
Ecad MO NO	No Overlap	h5b2	11.347	749.592	278.765	1643.614	18.362
Ecad MO NO	No Overlap	h5b2	11.347	825.867	281.948	1685.612	18.362
Ecad MO NO	No Overlap	h5b2	11.347	815.227	319.435	1541.91	18.362
Ecad MO NO	No Overlap	h5b2	11.347	793.738	306.086	1532.271	18.362
Ecad MO NO	No Overlap	h5b2	11.347	754.872	248.895	1436.514	18.362
Ecad MO NO	No Overlap	h5b2	11.347	699.043	284.276	1495.218	18.362
Ecad MO NO	No Overlap	h5b2	11.347	588.071	268.102	1384.111	18.362
Ecad MO NO	No Overlap	h5b2	11.347	327.549	250.099	1499.79	18.362
Ecad MO NO	No Overlap
Ecad MO NO	No Overlap	h5b3	13.238	480.244	184.821	1249.109	21.437
Ecad MO NO	No Overlap	h5b3	13.238	578.96	200.179	1734.594	21.437
Ecad MO NO	No Overlap	h5b3	13.238	669.962	217.176	2162.95	21.437
Ecad MO NO	No Overlap	h5b3	13.238	762.832	253.725	3021.64	21.437
Ecad MO NO	No Overlap	h5b3	13.238	825.512	300.112	3145.135	21.437
Ecad MO NO	No Overlap	h5b3	13.238	814.339	310.418	2928.262	21.437
Ecad MO NO	No Overlap	h5b3	13.238	591.545	280.545	2774.901	21.437
Ecad MO NO	No Overlap
Ecad MO NO	No Overlap	h5b4	8.808	874.716	241.677	1741.5	14.233
Ecad MO NO	No Overlap	h5b4	8.808	897.504	301.874	1969.869	14.233
Ecad MO NO	No Overlap	h5b4	8.808	849.53	289.927	1775.771	14.233
Ecad MO NO	No Overlap	h5b4	8.808	784.502	284.643	1493.091	14.233
Ecad MO NO	No Overlap	h5b4	8.808	725.902	309.626	1476.949	14.233
Ecad MO NO	No Overlap	h5b4	9.726	796.729	338.382	1477.967	15.727
Ecad MO NO	No Overlap	h5b4	9.726	720.214	373.912	1431.633	15.727
Ecad MO NO	No Overlap	h6b1	7.781	489.123	158.774	1239.245	12.564
Ecad MO NO	No Overlap	h6b1	7.781	528.481	183.868	1431.125	12.564
Ecad MO NO	No Overlap	h6b1	7.781	575.816	172.279	1404.654	12.564
Ecad MO NO	No Overlap	h6b1	7.781	662.803	181.961	1720.426	12.564
Ecad MO NO	No Overlap	h6b1	7.781	677.982	222.028	1810.638	12.564
Ecad MO NO	No Overlap	h6b1	7.781	615.561	214.84	2058.206	12.564
Ecad MO NO	No Overlap	h6b1	7.781	533.371	236.13	1865.325	12.564
Ecad MO NO	No Overlap	h6b1	7.781	428.145	174.965	1435.609	12.564
Ecad MO NO	No Overlap
Ecad MO NO	No Overlap	h6b2	9.726	337.532	143.888	606.496	15.727
Ecad MO NO	No Overlap	h6b2	9.726	450.644	194.03	838.517	15.727
Ecad MO NO	No Overlap	h6b2	9.726	584.747	210.648	1054.841	15.727
Ecad MO NO	No Overlap	h6b2	9.726	630.526	239.09	1263.817	15.727
Ecad MO NO	No Overlap	h6b2	9.726	490.779	197.018	1358.805	15.727
Ecad MO NO	No Overlap
Ecad MO NO	No Overlap	h6b3	8.321	361.402	156.795	726.439	13.442
Ecad MO NO	No Overlap	h6b3	8.321	481.177	159.448	1110.195	13.442
Ecad MO NO	No Overlap	h6b3	8.321	593.984	187.137	1298.277	13.442
Ecad MO NO	No Overlap	h6b3	8.321	641.3	182.061	1416.039	13.442
Ecad MO NO	No Overlap	h6b3	8.321	667.482	163.964	1620.945	13.442
Ecad MO NO	No Overlap	h6b3	8.321	525.653	144.9	1925.06	13.442
Ecad MO NO	No Overlap
Ecad MO NO	No Overlap	h6b4	8.645	530.247	181.664	1087.074	13.97
Ecad MO NO	No Overlap	h6b4	8.645	570.204	179.559	1186.43	13.97
Ecad MO NO	No Overlap	h6b4	8.645	586.137	192.942	1271.149	13.97
Ecad MO NO	No Overlap	h6b4	8.645	670.386	215.416	1481.509	13.97
Ecad MO NO	No Overlap	h6b4	8.645	743.847	272.012	1503.211	13.97
Ecad MO NO	No Overlap	h6b4	8.645	770.476	278.362	1668.059	13.97
Ecad MO NO	No Overlap	h6b4	8.645	576.319	299.718	1642.85	13.97
Ecad MO NO	No Overlap
Ecad MO NO	No Overlap	h6b5	12.05	393.96	180.642	751.43	19.505
Ecad MO NO	No Overlap	h6b5	12.05	538.549	250.042	1049.4	19.505
Ecad MO NO	No Overlap	h6b5	12.05	652.878	212.501	1381.513	19.505
Ecad MO NO	No Overlap	h6b5	12.05	696.178	247.526	1538.625	19.505
Ecad MO NO	No Overlap	h6b5	12.05	768.53	235.476	1542.028	19.505
Ecad MO NO	No Overlap	h6b5	12.05	823.315	271.998	1976.608	19.505
Ecad MO NO	No Overlap	h6b5	12.05	642.855	301.185	1910.724	19.505
Ecad MO NO	No Overlap
Ecad MO NO	No Overlap	h6b6	7.187	353.556	173.731	647.95	11.597
Ecad MO NO	No Overlap	h6b6	7.187	448.173	190.635	904.724	11.597
Ecad MO NO	No Overlap	h6b6	7.187	517.704	215.264	1075.585	11.597
Ecad MO NO	No Overlap	h6b6	7.187	557.483	175.556	1219.868	11.597
Ecad MO NO	No Overlap	h6b6	7.187	566.672	208.842	1214.641	11.597
Ecad MO NO	No Overlap	h6b6	7.187	624.838	218.127	1228.629	11.597
Ecad MO NO	No Overlap	h6b6	7.187	633.297	260.363	1505.254	11.597
Ecad MO NO	No Overlap	h6b6	11.563	419.839	170.711	1033.468	18.714
Ecad MO NO	No Overlap	h6b6	11.563	408.369	194.864	991.737	18.714
Ecad MO NO	No Overlap	h6b6	11.563	438.618	207.034	1165.758	18.714
Ecad MO NO	No Overlap	h6b6	11.563	482.661	186.836	1218.295	18.714
Ecad MO NO	No Overlap
Ecad MO NO	No Overlap
Ecad MO NO	No Overlap	h7b1	10.699	1393.541	564.26	3234.091	17.308
Ecad MO NO	No Overlap	h7b1	10.699	1490.495	565.685	3604.086	17.308
Ecad MO NO	No Overlap	h7b1	10.699	1551.429	597.045	3866.055	17.308
Ecad MO NO	No Overlap	h7b1	10.699	1555.53	650.299	3728.002	17.308
Ecad MO NO	No Overlap	h7b1	10.699	1385.591	604.75	2951.093	17.308
Ecad MO NO	No Overlap
Ecad MO NO	No Overlap	h7b2	4.269	1726.316	838.729	2992.779	6.852
Ecad MO NO	No Overlap	h7b2	4.269	1761.885	861.711	2811.499	6.852
Ecad MO NO	No Overlap	h7b2	4.269	1682.935	1005.998	3138.208	6.852
Ecad MO NO	No Overlap	h7b2	4.269	1442.205	804.746	2671.889	6.852
Ecad MO NO	No Overlap	h7b2	4.269	1152.736	651.993	2118.016	6.852
Ecad MO NO	No Overlap
Ecad MO NO	No Overlap	h7b3	6.106	1569.619	851.893	3530.593	9.84
Ecad MO NO	No Overlap	h7b3	6.106	1771.384	916.32	3619.589	9.84
Ecad MO NO	No Overlap	h7b3	6.106	1920.737	781.542	3532.135	9.84
Ecad MO NO	No Overlap	h7b3	6.106	1908.227	789.777	3272.804	9.84
Ecad MO NO	No Overlap	h7b3	6.106	1769.574	758.278	3164.746	9.84
Ecad MO NO	No Overlap
Ecad MO NO	No Overlap	h7b4	6.97	1912.336	744.373	4079.72	11.246
Ecad MO NO	No Overlap	h7b4	6.97	1808.998	637.022	4066.898	11.246
Ecad MO NO	No Overlap	h7b4	6.97	1629.506	719.812	3923.467	11.246
Ecad MO NO	No Overlap	h7b4	6.97	1393.852	521.419	3577.765	11.246
Ecad MO NO	No Overlap	h7b4	6.97	1199.209	436.338	3209.72	11.246
Ecad MO NO	No Overlap	h7b4	6.97	1051.747	365.246	3071.128	11.246
Ecad MO NO	No Overlap
Ecad MO NO	No Overlap	h7b5	4.647	1381.132	788.575	2794.083	7.464
Ecad MO NO	No Overlap	h7b5	4.647	1255.572	696.206	2237.463	7.464
Ecad MO NO	No Overlap	h7b5	4.647	1053.341	577.085	2093.956	7.464
Ecad MO NO	No Overlap	h7b5	4.647	906.412	426.671	1997.481	7.464
Ctrl MO CO	Complete Overlap	h9b1	10.321	621.255	57.533	1921.878	16.693
Ctrl MO CO	Complete Overlap	h9b1	10.321	513.016	53.169	2092.6	16.693
Ctrl MO CO	Complete Overlap	h9b1	10.321	613.418	54.449	2152.331	16.693
Ctrl MO CO	Complete Overlap	h9b1	10.321	731.845	91.068	1878.617	16.693
Ctrl MO CO	Complete Overlap	h9b1	10.321	844.411	95.713	2322.1	16.693
Ctrl MO CO	Complete Overlap	h9b1	10.321	862.359	96.742	3418.381	16.693
Ctrl MO CO	Complete Overlap	h9b1	10.321	815.039	93.999	2908.51	16.693
Ctrl MO CO	Complete Overlap	h9b1	10.321	687.535	70.67	2853.15	16.693
Ctrl MO CO	Complete Overlap	h9b1	10.321	507.914	28.421	2818.649	16.693
Ctrl MO CO	Complete Overlap
Ctrl MO CO	Complete Overlap	h9b2	8.591	361.015	63.592	1741.256	13.882
Ctrl MO CO	Complete Overlap	h9b2	8.591	446.321	106.796	1676.272	13.882
Ctrl MO CO	Complete Overlap	h9b2	8.591	570.706	117.78	1942.894	13.882
Ctrl MO CO	Complete Overlap	h9b2	8.591	762.557	166.94	2322.115	13.882
Ctrl MO CO	Complete Overlap	h9b2	8.591	904.108	198.39	3518.919	13.882
Ctrl MO CO	Complete Overlap	h9b2	8.591	575.579	100.9	2334.186	13.882
Ctrl MO CO	Complete Overlap
Ctrl MO CO	Complete Overlap	h9b3	8.429	347.147	1.946	1391.204	13.602
Ctrl MO CO	Complete Overlap	h9b3	8.429	431.586	0.131	1805.318	13.602
Ctrl MO CO	Complete Overlap	h9b3	8.429	500.911	14.573	2166.582	13.602
Ctrl MO CO	Complete Overlap	h9b3	8.429	601.966	22.767	2328.052	13.602
Ctrl MO CO	Complete Overlap	h9b3	8.429	674.235	68.952	3241.283	13.602
Ctrl MO CO	Complete Overlap	h9b3	8.429	614.925	122.467	2355.434	13.602
Ctrl MO CO	Complete Overlap	h9b3	8.429	615.007	90.089	2994.143	13.602
Ctrl MO CO	Complete Overlap
Ctrl MO CO	Complete Overlap	h9b4	7.943	285.088	5.478	895.29	12.827
Ctrl MO CO	Complete Overlap	h9b4	7.943	156.833	1.093	654.743	12.827
Ctrl MO CO	Complete Overlap	h9b4	7.943	285.088	5.478	895.29	12.827
Ctrl MO CO	Complete Overlap	h9b4	7.943	456.041	19.117	1474.79	12.827
Ctrl MO CO	Complete Overlap	h9b4	7.943	545.895	24.352	2101.811	12.827
Ctrl MO CO	Complete Overlap	h9b4	8.267	734.825	49.604	2056.137	13.354
Ctrl MO CO	Complete Overlap	h9b4	8.267	819.314	80.518	1895.13	13.354
Ctrl MO CO	Complete Overlap	h9b4	8.267	863.189	127.784	2804.908	13.354
Ctrl MO CO	Complete Overlap	h9b4	8.267	797.673	143.415	2633.233	13.354
Ctrl MO CO	Complete Overlap	h10b1	11.239	623.766	73.79	1938.254	18.187
Ctrl MO CO	Complete Overlap	h10b1	11.239	825.6	87.1	2770.423	18.187
Ctrl MO CO	Complete Overlap	h10b1	11.239	897.898	111.3	2957.749	18.187
Ctrl MO CO	Complete Overlap	h10b1	11.239	962.364	112.581	3211.273	18.187
Ctrl MO CO	Complete Overlap	h10b1	11.239	898.635	98.387	2737.427	18.187
Ctrl MO CO	Complete Overlap	h10b1	11.239	564.921	74.193	2426.308	18.187
Ctrl MO CO	Complete Overlap
Ctrl MO CO	Complete Overlap	h10b2	7.997	236.851	8.843	795.672	12.915
Ctrl MO CO	Complete Overlap	h10b2	7.997	419.756	50.843	1940.152	12.915
Ctrl MO CO	Complete Overlap	h10b2	7.997	509.943	99.089	1909.117	12.915
Ctrl MO CO	Complete Overlap	h10b2	7.997	536.42	104.659	1703.975	12.915
Ctrl MO CO	Complete Overlap	h10b2	7.997	592.016	84.594	1641.687	12.915
Ctrl MO CO	Complete Overlap	h10b2	7.997	581.574	73.43	1868.475	12.915
Ctrl MO CO	Complete Overlap	h10b2	7.997	401.873	82.258	1327.451	12.915
Ctrl MO CO	Complete Overlap
Ctrl MO CO	Complete Overlap	h10b3	5.295	177.582	21.045	553.107	8.522
Ctrl MO CO	Complete Overlap	h10b3	5.295	293.545	46.861	835.07	8.522
Ctrl MO CO	Complete Overlap	h10b3	5.295	488.125	62.662	1305.805	8.522
Ctrl MO CO	Complete Overlap	h10b3	5.295	618.46	113.131	1473.953	8.522
Ctrl MO CO	Complete Overlap	h10b3	5.295	674.383	147.625	1696.004	8.522
Ctrl MO CO	Complete Overlap	h10b3	5.295	761.967	198.813	2099.94	8.522
Ctrl MO CO	Complete Overlap	h10b3	5.295	781.006	206.667	1864.701	8.522
Ctrl MO CO	Complete Overlap	h10b3	5.295	611.367	153.672	1456.049	8.522
Ctrl MO CO	Complete Overlap
Ctrl MO CO	Complete Overlap	h10b4	10.861	454.825	85.397	1368.953	17.572
Ctrl MO CO	Complete Overlap	h10b4	10.861	547.067	65.23	1515.11	17.572
Ctrl MO CO	Complete Overlap	h10b4	10.861	565.941	51.923	1563.498	17.572
Ctrl MO CO	Complete Overlap	h10b4	10.861	603.659	80.065	2150.46	17.572
Ctrl MO CO	Complete Overlap	h10b4	10.699	900.621	137.093	3495.476	17.308
Ctrl MO CO	Complete Overlap	h10b4	10.699	871.144	158.415	2809.073	17.308
Ctrl MO CO	Complete Overlap	h10b4	10.699	673.011	122.703	2656.009	17.308
Ctrl MO CO	Complete Overlap
Ctrl MO CO	Complete Overlap	h10b5	8.97	327.149	29.275	1484.803	14.496
Ctrl MO CO	Complete Overlap	h10b5	8.97	542.951	35.828	2051.724	14.496
Ctrl MO CO	Complete Overlap	h10b5	8.97	689.441	45.047	2602.859	14.496
Ctrl MO CO	Complete Overlap	h10b5	8.97	733.261	33.53	2537.496	14.496
Ctrl MO CO	Complete Overlap	h10b5	8.97	782.866	72.757	2682.856	14.496
Ctrl MO CO	Complete Overlap	h10b5	8.97	813.962	98.763	2515.809	14.496
Ctrl MO CO	Complete Overlap	h10b5	8.97	804.084	106.286	2944.138	14.496
Ctrl MO CO	Complete Overlap	h10b5	8.97	746.32	102.972	2445.816	14.496
Ctrl MO CO	Complete Overlap	h11b1	8.754	224.776	16.514	817.189	14.145
Ctrl MO CO	Complete Overlap	h11b1	8.754	332.981	28.505	1214.114	14.145
Ctrl MO CO	Complete Overlap	h11b1	8.754	501.207	54.06	1706.29	14.145
Ctrl MO CO	Complete Overlap	h11b1	8.754	744.6	100.111	2254.068	14.145
Ctrl MO CO	Complete Overlap	h11b1	8.754	1100.248	97.69	3413.115	14.145
Ctrl MO CO	Complete Overlap	h11b1	8.754	1155.838	161.702	3398.279	14.145
Ctrl MO CO	Complete Overlap	h11b1	8.754	1085.804	171.04	2836.651	14.145
Ctrl MO CO	Complete Overlap	h11b1	8.754	872.447	152.706	3432.799	14.145
Ctrl MO CO	Complete Overlap	h11b1	8.754	560.712	52.665	2535.154	14.145
Ctrl MO CO	Complete Overlap
Ctrl MO CO	Complete Overlap	h11b2	3.944	257.04	31.321	1265.633	6.326
Ctrl MO CO	Complete Overlap	h11b2	3.944	439.58	67.94	1670.512	6.326
Ctrl MO CO	Complete Overlap	h11b2	3.944	670.306	95.594	2172.265	6.326
Ctrl MO CO	Complete Overlap	h11b2	3.944	904.316	142.927	2647.894	6.326
Ctrl MO CO	Complete Overlap	h11b2	3.944	1168.465	209.33	2801.794	6.326
Ctrl MO CO	Complete Overlap	h11b2	3.944	1183.307	401.29	2264.261	6.326
Ctrl MO CO	Complete Overlap	h11b2	3.944	995.408	393.112	2074.039	6.326
Ctrl MO CO	Complete Overlap	h11b2	3.944	672.842	224.213	1561.51	6.326
Ctrl MO CO	Complete Overlap
Ctrl MO CO	Complete Overlap	h11b3	12.374	743.792	57.384	2007.274	20.032
Ctrl MO CO	Complete Overlap	h11b3	12.374	984.461	55.879	3098.769	20.032
Ctrl MO CO	Complete Overlap	h11b3	12.374	1150.175	75.724	3912.558	20.032
Ctrl MO CO	Complete Overlap	h11b3	12.374	1101.461	53.986	3713.929	20.032
Ctrl MO CO	Complete Overlap	h11b3	12.374	1044.702	100.809	3629.794	20.032
Ctrl MO CO	Complete Overlap	h11b3	12.374	890.937	153.56	2773.781	20.032
Ctrl MO CO	Complete Overlap	h11b3	12.374	577.578	54.205	2016.403	20.032
Ctrl MO CO	Complete Overlap
Ctrl MO CO	Complete Overlap	h11b4	14.913	401.03	18.925	1508.659	24.161
Ctrl MO CO	Complete Overlap	h11b4	14.913	465.757	14.456	1641.311	24.161
Ctrl MO CO	Complete Overlap	h11b4	14.913	524.646	1.582	2062.911	24.161
Ctrl MO CO	Complete Overlap	h11b4	14.967	980.765	139.634	2527.303	24.249
Ctrl MO CO	Complete Overlap	h11b4	14.967	1058.337	141.492	2608.771	24.249
Ctrl MO CO	Complete Overlap	h11b4	14.967	1053.126	119.228	3282.98	24.249
Ctrl MO CO	Complete Overlap	h11b4	14.967	985.764	170.764	3202.303	24.249
Ctrl MO CO	Complete Overlap	h11b4	14.967	770.537	86.966	3042.046	24.249
Ctrl MO CO	Complete Overlap
Ctrl MO CO	Complete Overlap	h11b5	7.619	572.932	94.733	1679.025	12.3
Ctrl MO CO	Complete Overlap	h11b5	7.619	780.113	132.462	2223.867	12.3
Ctrl MO CO	Complete Overlap	h11b5	7.619	947.888	80.706	2730.801	12.3
Ctrl MO CO	Complete Overlap	h11b5	7.619	942.256	115.755	2472.255	12.3
Ctrl MO CO	Complete Overlap	h11b5	7.619	948.818	151.424	2441.651	12.3
Ctrl MO CO	Complete Overlap	h11b5	7.619	905.373	91.575	2660.37	12.3
Ctrl MO CO	Complete Overlap
Ctrl MO CO	Complete Overlap	h11b6	7.187	356.714	27.517	1174.768	11.597
Ctrl MO CO	Complete Overlap	h11b6	7.187	497.934	27.568	1436.363	11.597
Ctrl MO CO	Complete Overlap	h11b6	7.187	614.573	70.864	1713.528	11.597
Ctrl MO CO	Complete Overlap	h11b6	7.187	631.275	72.659	1572.388	11.597
Ctrl MO CO	Complete Overlap	h11b6	7.187	665.008	96.548	2173.848	11.597
Ctrl MO CO	Complete Overlap	h11b6	7.187	691.308	72.326	1922.643	11.597
Ctrl MO CO	Complete Overlap	h11b6	7.187	540.709	77.241	1582.276	11.597
Ctrl MO CO	Complete Overlap
Ctrl MO CO	Complete Overlap	h11b7	10.645	454.697	106.393	1159.261	17.22
Ctrl MO CO	Complete Overlap	h11b7	10.645	601.254	84.738	1662.287	17.22
Ctrl MO CO	Complete Overlap	h11b7	10.645	658.479	92.341	1991.012	17.22
Ctrl MO CO	Complete Overlap	h11b7	10.645	617.531	103.775	1835.236	17.22
Ctrl MO CO	Complete Overlap	h11b7	10.645	655.193	105.237	1940.95	17.22
Ctrl MO CO	Complete Overlap	h11b7	10.645	749.961	119.288	2268.051	17.22
Ctrl MO CO	Complete Overlap	h11b7	10.645	840.801	141.716	3746.669	17.22
Ctrl MO CO	Complete Overlap	h11b7	10.645	776.031	96.915	3614.403	17.22
Ctrl MO CO	Complete Overlap
Ctrl MO CO	Complete Overlap	h11b8	9.564	503.59	98.155	1365.454	15.463
Ctrl MO CO	Complete Overlap	h11b8	9.564	635.563	89.958	1803.277	15.463
Ctrl MO CO	Complete Overlap	h11b8	9.564	767.221	45.432	2322.42	15.463
Ctrl MO CO	Complete Overlap	h11b8	9.564	880.106	92.198	2821.95	15.463
Ctrl MO CO	Complete Overlap	h11b8	9.564	780.89	56.947	3356.57	15.463
Ctrl MO CO	Complete Overlap	h11b8	9.564	724.554	104.078	3092.589	15.463
Ctrl MO CO	Complete Overlap	h11b8	6.7	948.45	129.854	3296.872	10.806
Ctrl MO CO	Complete Overlap	h11b8	6.7	829.424	171.39	2479.387	10.806
Ctrl MO CO	Complete Overlap	h11b8	6.7	665.643	68.736	2385.479	10.806
Ctrl MO CO	Complete Overlap
Ctrl MO CO	Complete Overlap	h11b9	8.591	340.714	34.768	1029.545	13.882
Ctrl MO CO	Complete Overlap	h11b9	8.591	459.766	66.688	1267.181	13.882
Ctrl MO CO	Complete Overlap	h11b9	8.591	642.579	104.434	1712.514	13.882
Ctrl MO CO	Complete Overlap	h11b9	8.591	980.951	113.054	3101.378	13.882
Ctrl MO CO	Complete Overlap	h11b9	8.591	1058.165	152.865	3419.682	13.882
Ctrl MO CO	Complete Overlap	h11b9	8.591	948.691	146.299	2945.406	13.882
Ctrl MO CO	Complete Overlap	h11b9	8.591	778.102	84.507	2252.099	13.882
Ctrl MO CO	Complete Overlap
Ctrl MO CO	Complete Overlap	h11b10	9.942	363.376	32.536	1071.526	16.078
Ctrl MO CO	Complete Overlap	h11b10	9.942	460.706	61.383	1633.92	16.078
Ctrl MO CO	Complete Overlap	h11b10	9.942	575.03	74.197	2170.934	16.078
Ctrl MO CO	Complete Overlap	h11b10	9.942	778.725	107.267	2557.147	16.078
Ctrl MO CO	Complete Overlap	h11b10	9.942	898.396	177.979	2965.683	16.078
Ctrl MO CO	Complete Overlap	h11b10	9.942	952.039	245.448	3214.893	16.078
Ctrl MO CO	Complete Overlap	h11b10	9.942	921.87	173.54	3168.733	16.078
Ctrl MO CO	Complete Overlap	h11b10	9.942	753.567	92.019	2918.533	16.078
Ctrl MO CO	Complete Overlap
Ctrl MO CO	Complete Overlap	h11b11	6.646	230.096	12.209	730.921	10.719
Ctrl MO CO	Complete Overlap	h11b11	6.646	320.546	29.341	908.977	10.719
Ctrl MO CO	Complete Overlap	h11b11	6.646	413.536	78.688	1274.58	10.719
Ctrl MO CO	Complete Overlap	h11b11	6.646	614.617	106.372	1641.702	10.719
Ctrl MO CO	Complete Overlap	h11b11	6.646	748.941	188.976	2328.389	10.719
Ctrl MO CO	Complete Overlap	h11b11	6.646	882.738	81.729	2681.424	10.719
Ctrl MO CO	Complete Overlap	h11b11	6.646	979.802	161.625	3702.893	10.719
Ctrl MO CO	Complete Overlap	h11b11	6.646	911.221	106.532	2451.307	10.719
Ctrl MO CO	Complete Overlap
Ctrl MO CO	Complete Overlap	h11b12	10.915	217.203	15.934	706.237	17.659
Ctrl MO CO	Complete Overlap	h11b12	10.915	265.136	12.955	1208.379	17.659
Ctrl MO CO	Complete Overlap	h11b12	10.915	295.357	25.233	1279.721	17.659
Ctrl MO CO	Complete Overlap	h11b12	10.915	300.859	38.404	1452.246	17.659
Ctrl MO CO	Complete Overlap	h11b12	11.725	705.583	39.451	2328.074	18.969
Ctrl MO CO	Complete Overlap	h11b12	11.725	764.273	70.897	2590.301	18.969
Ctrl MO CO	Complete Overlap	h11b12	11.725	842.641	124.908	2398.179	18.969
Ctrl MO CO	Complete Overlap	h11b12	11.725	773.658	128.522	2757.931	18.969
Ctrl MO CO	Complete Overlap
Ctrl MO CO	Complete Overlap	h11b13	8.808	349.09	24.422	990.136	14.231
Ctrl MO CO	Complete Overlap	h11b13	8.808	468.56	38.248	1466.481	14.231
Ctrl MO CO	Complete Overlap	h11b13	8.808	580.685	88.886	1395.04	14.231
Ctrl MO CO	Complete Overlap	h11b13	8.808	567.249	87.877	1335.237	14.231
Ctrl MO CO	Complete Overlap	h11b13	8.808	570.387	139.115	1821.631	14.231
Ctrl MO CO	Complete Overlap	h11b13	8.808	565.182	83.602	2804.045	14.231
Ctrl MO CO	Complete Overlap	h11b13	8.808	488.599	88.855	3275.056	14.231
Ctrl MO CO	Complete Overlap	h12b1	12.536	310.995	29.298	1498.984	20.295
Ctrl MO CO	Complete Overlap	h12b1	12.536	379.133	36.644	2437.864	20.295
Ctrl MO CO	Complete Overlap	h12b1	12.536	576.342	3.177	3792.681	20.295
Ctrl MO CO	Complete Overlap	h12b1	12.536	648.799	42.675	3707.091	20.295
Ctrl MO CO	Complete Overlap	h12b1	12.536	596.835	38.281	3047.638	20.295
Ctrl MO CO	Complete Overlap	h12b1	12.536	418.106	28.777	2513.586	20.295
Ctrl MO CO	Complete Overlap
Ctrl MO CO	Complete Overlap	h12b2	8.808	270.896	45.281	874.888	14.233
Ctrl MO CO	Complete Overlap	h12b2	8.808	319.091	44.119	1051.051	14.233
Ctrl MO CO	Complete Overlap	h12b2	8.808	373.738	39.546	1158.335	14.233
Ctrl MO CO	Complete Overlap	h12b2	8.808	430.614	53.349	2513.635	14.233
Ctrl MO CO	Complete Overlap	h12b2	8.808	451.473	51.517	2853.564	14.233
Ctrl MO CO	Complete Overlap	h12b2	8.808	547.341	82.52	3578.748	14.233
Ctrl MO CO	Complete Overlap
Ctrl MO CO	Complete Overlap	h12b3	9.996	108.854	2.195	410.584	16.166
Ctrl MO CO	Complete Overlap	h12b3	9.996	191.86	3.663	771.798	16.166
Ctrl MO CO	Complete Overlap	h12b3	9.996	245.641	10.496	1203.681	16.166
Ctrl MO CO	Complete Overlap	h12b3	9.996	301.542	16.019	1394.048	16.166
Ctrl MO CO	Complete Overlap	h12b3	9.996	348.892	23.275	1759.671	16.166
Ctrl MO CO	Complete Overlap	h12b3	9.996	303.132	29.987	1484.51	16.166
Ctrl MO CO	Complete Overlap
Ctrl MO CO	Complete Overlap	h12b4	8.051	157.096	2.406	850.902	13.003
Ctrl MO CO	Complete Overlap	h12b4	8.051	255.848	2.223	2097.731	13.003
Ctrl MO CO	Complete Overlap	h12b4	8.051	306.252	15.884	2611.115	13.003
Ctrl MO CO	Complete Overlap	h12b4	7.673	936.006	176.986	3416.887	12.388
Ctrl MO CO	Complete Overlap	h12b4	7.673	1027.273	197.951	3636.583	12.388
Ctrl MO CO	Complete Overlap	h12b4	7.673	1081.272	110.655	3231.355	12.388
Ctrl MO CO	Complete Overlap	h12b4	7.673	1304.841	104.882	4013.661	12.388
Ctrl MO CO	Complete Overlap	h12b4	7.673	1373.82	209.747	4095	12.388
Ctrl MO CO	Complete Overlap	h12b4	7.673	1100.569	155.293	4095	12.388
Ctrl MO CO	Complete Overlap
Ctrl MO CO	Complete Overlap	h12b5	9.942	526.291	81.664	1622.208	16.078
Ctrl MO CO	Complete Overlap	h12b5	9.942	663.666	59.529	2185.852	16.078
Ctrl MO CO	Complete Overlap	h12b5	9.942	744.692	89.098	3123.292	16.078
Ctrl MO CO	Complete Overlap	h12b5	9.942	834.253	81.049	3264.797	16.078
Ctrl MO CO	Complete Overlap	h12b5	10.104	1119.843	120.443	3931.954	16.342
Ctrl MO CO	Complete Overlap	h12b5	10.104	1246.083	136.032	4093.53	16.342
Ctrl MO CO	Complete Overlap	h12b5	10.104	1196.836	135.958	3935.478	16.342
Ctrl MO CO	Complete Overlap	h12b5	10.104	726.755	131.917	2723.59	16.342
Ctrl MO CO	Complete Overlap
Ctrl MO CO	Complete Overlap	h12b6	12.482	696.931	83.716	1912.522	20.207
Ctrl MO CO	Complete Overlap	h12b6	12.482	829.104	75.22	2804.708	20.207
Ctrl MO CO	Complete Overlap	h12b6	12.482	856.738	72.336	3590.833	20.207
Ctrl MO CO	Complete Overlap	h12b6	12.482	843.407	86.506	3732.912	20.207
Ctrl MO CO	Complete Overlap	h12b6	12.698	1061.435	136.701	2804.604	20.559
Ctrl MO CO	Complete Overlap	h12b6	12.698	1028.29	176.017	2920.942	20.559
Ctrl MO CO	Complete Overlap	h12b6	12.698	1045.119	105.308	4095	20.559
Ctrl MO CO	Complete Overlap	h12b6	12.698	903.646	52.594	4076.197	20.559
Ctrl MO CO	Complete Overlap	h13b1	10.807	744.894	136.353	2530.161	17.484
Ctrl MO CO	Complete Overlap	h13b1	10.807	886.247	131.603	2662.196	17.484
Ctrl MO CO	Complete Overlap	h13b1	10.807	1041.327	135.593	3049.638	17.484
Ctrl MO CO	Complete Overlap	h13b1	10.807	1267.521	147.583	4022.319	17.484
Ctrl MO CO	Complete Overlap	h13b1	10.807	1306.292	151.13	4095	17.484
Ctrl MO CO	Complete Overlap	h13b1	10.807	1216.212	163.656	4095	17.484
Ctrl MO CO	Complete Overlap	h13b1	10.807	1131.005	162.204	4095	17.484
Ctrl MO CO	Complete Overlap	h13b1	10.807	1021.397	252.835	4095	17.484
Ctrl MO CO	Complete Overlap
Ctrl MO CO	Complete Overlap	h13b2	14.751	421.371	34.94	1797.012	23.898
Ctrl MO CO	Complete Overlap	h13b2	14.751	444.047	42.781	1925.254	23.898
Ctrl MO CO	Complete Overlap	h13b2	14.751	430.563	44.226	2912.064	23.898
Ctrl MO CO	Complete Overlap	h13b2	14.751	345.558	32.512	1936.104	23.898
Ctrl MO CO	Complete Overlap	h13b2	14.751	293.014	49.029	1549.189	23.898
Ctrl MO CO	Complete Overlap	h13b2	14.751	818.523	65.592	3370.211	23.897
Ctrl MO CO	Complete Overlap	h13b2	14.751	705.077	83.195	2531.209	23.897
Ctrl MO CO	Complete Overlap	h13b2	14.751	519.911	53.016	2404.421	23.897
Ctrl MO CO	Complete Overlap	h13b2	14.751	326.232	33.217	1320.984	23.897
Ctrl MO CO	Complete Overlap
Ctrl MO CO	Complete Overlap	h13b3	10.104	979.2	111.285	2591.813	16.342
Ctrl MO CO	Complete Overlap	h13b3	10.104	1142.446	164.425	3205.743	16.342
Ctrl MO CO	Complete Overlap	h13b3	10.104	1211.011	138.97	3158.812	16.342
Ctrl MO CO	Complete Overlap	h13b3	10.104	1165.151	180.89	3444.527	16.342
Ctrl MO CO	Complete Overlap	h13b3	10.104	1067.801	242.002	2652.657	16.342
Ctrl MO CO	Complete Overlap	h13b3	10.104	1017.046	224.141	2683.995	16.342
Ctrl MO CO	Complete Overlap	h13b3	10.104	909.138	227.906	2821.845	16.342
Ctrl MO CO	Complete Overlap	h13b3	10.104	711.889	111.862	2605.284	16.342
Ctrl MO CO	Complete Overlap
Ctrl MO CO	Complete Overlap	h13b4	9.024	447.484	35.887	1194.663	14.585
Ctrl MO CO	Complete Overlap	h13b4	9.024	676.646	59.97	2058.93	14.585
Ctrl MO CO	Complete Overlap	h13b4	9.024	838.025	46.972	2517.423	14.585
Ctrl MO CO	Complete Overlap	h13b4	9.024	1095.005	72.182	3370.148	14.585
Ctrl MO CO	Complete Overlap	h13b4	9.024	1325.928	75.343	4006.395	14.585
Ctrl MO CO	Complete Overlap	h13b4	9.024	1622.293	134.761	4046.752	14.585
Ctrl MO CO	Complete Overlap	h13b4	9.024	1682.869	133.934	4094.529	14.585
Ctrl MO CO	Complete Overlap	h13b4	9.024	1617.134	171.922	4081.703	14.585
Ctrl MO CO	Complete Overlap	h13b4	9.024	1384.022	111.739	4044.692	14.585
Ctrl MO CO	Complete Overlap
Ctrl MO CO	Complete Overlap	h13b5	9.186	714.674	56.146	2256.831	14.848
Ctrl MO CO	Complete Overlap	h13b5	9.186	836.05	52.708	2843.496	14.848
Ctrl MO CO	Complete Overlap	h13b5	9.186	941.517	61.662	3036.021	14.848
Ctrl MO CO	Complete Overlap	h13b5	9.294	1391.264	172.144	3790.169	15.024
Ctrl MO CO	Complete Overlap	h13b5	9.294	1620.37	129.447	4067.907	15.024
Ctrl MO CO	Complete Overlap	h13b5	9.294	1406.877	158.119	3843.235	15.024
Ctrl MO CO	Complete Overlap	h13b5	9.294	1031.778	198.332	3373.695	15.024
Ctrl MO CO	Complete Overlap	h13b5	9.294	691.178	94.239	2887.151	15.024
Ctrl MO CO	Complete Overlap
Ctrl MO CO	Complete Overlap	h13b6	7.295	526.347	85.204	1441.858	11.773
Ctrl MO CO	Complete Overlap	h13b6	7.295	735.029	93.012	1984.594	11.773
Ctrl MO CO	Complete Overlap	h13b6	7.295	883.49	96.191	2810.92	11.773
Ctrl MO CO	Complete Overlap	h13b6	7.295	1015.464	131.51	3426.143	11.773
Ctrl MO CO	Complete Overlap	h13b6	7.295	1057.991	147.02	3177.458	11.773
Ctrl MO CO	Complete Overlap	h13b6	7.295	931.905	80.633	4073.942	11.773
Ctrl MO CO	Complete Overlap	h13b6	7.295	761.004	142.18	3159.299	11.773
Ctrl MO CO	Complete Overlap	h13b6	7.295	592.75	125.372	1651.016	11.773
Ctrl MO CO	Complete Overlap
Ctrl MO CO	Complete Overlap	h13b7	5.89	605.801	59.59	2174.067	9.489
Ctrl MO CO	Complete Overlap	h13b7	5.89	696.488	75.457	2022.229	9.489
Ctrl MO CO	Complete Overlap	h13b7	5.89	790.586	67.439	2597.25	9.489
Ctrl MO CO	Complete Overlap	h13b7	5.89	927.454	143.023	2888.082	9.489
Ctrl MO CO	Complete Overlap	h13b7	5.89	1014.676	126.544	3520.505	9.489
Ctrl MO CO	Complete Overlap	h13b7	5.89	958.267	144.097	3986.087	9.489
Ctrl MO CO	Complete Overlap	h13b7	5.89	895.508	177.166	3260.234	9.489
Ctrl MO CO	Complete Overlap
Ctrl MO CO	Complete Overlap	h13b8	3.999	443.646	41.181	1408.459	6.408
Ctrl MO CO	Complete Overlap	h13b8	3.999	564.091	72.878	1378.621	6.408
Ctrl MO CO	Complete Overlap	h13b8	3.999	638.659	62.122	2182.958	6.408
Ctrl MO CO	Complete Overlap	h13b8	3.999	707.497	111.839	2206.407	6.408
Ctrl MO CO	Complete Overlap	h13b8	3.999	805.728	152.652	2402.962	6.408
Ctrl MO CO	Complete Overlap	h13b8	3.999	829.779	221.933	2868.989	6.408
Ctrl MO CO	Complete Overlap	h13b8	3.999	805.58	274.968	2182.398	6.408
Ctrl MO CO	Complete Overlap
Ctrl MO CO	Complete Overlap	h13b9	9.402	620.006	121.728	1894.429	15.2
Ctrl MO CO	Complete Overlap	h13b9	9.402	804.931	118.918	2971.902	15.2
Ctrl MO CO	Complete Overlap	h13b9	9.402	1063.302	144.965	4095	15.2
Ctrl MO CO	Complete Overlap	h13b9	9.402	1218.46	113.825	4095	15.2
Ctrl MO CO	Complete Overlap	h13b9	9.402	1043.772	14.956	4073.718	15.2
Ctrl MO CO	Complete Overlap	h13b9	9.402	991.175	22.678	4095	15.2
Ctrl MO CO	Complete Overlap
Ctrl MO CO	Complete Overlap	h13b10	10.212	542.672	106.846	1110.228	16.517
Ctrl MO CO	Complete Overlap	h13b10	10.212	780.33	144.427	1729.903	16.517
Ctrl MO CO	Complete Overlap	h13b10	10.212	885.381	180.651	2299.631	16.517
Ctrl MO CO	Complete Overlap	h13b10	10.212	931.727	122.287	2781.33	16.517
Ctrl MO CO	Complete Overlap	h13b10	10.212	910.448	95.376	3167.464	16.517
Ctrl MO CO	Complete Overlap	h13b10	10.212	732.063	61.48	3442.36	16.517
Ctrl MO CO	Complete Overlap	h13b10	10.212	617.603	36.882	2486.934	16.517
Ctrl MO CO	Complete Overlap
Ctrl MO CO	Complete Overlap	h13b11	13.022	789.53	131.613	2105.327	21.086
Ctrl MO CO	Complete Overlap	h13b11	13.022	962.954	146.634	2254.522	21.086
Ctrl MO CO	Complete Overlap	h13b11	13.022	1153.847	160.867	2776.389	21.086
Ctrl MO CO	Complete Overlap	h13b11	13.022	1369.057	252.361	3179.44	21.086
Ctrl MO CO	Complete Overlap	h13b11	13.022	1256.634	179.662	3049.896	21.086
Ctrl MO CO	Complete Overlap	h13b11	13.022	1093.774	195.802	3252.823	21.086
Ctrl MO CO	Complete Overlap	h13b11	13.022	894.567	144.973	3814.419	21.086
Ctrl MO CO	Complete Overlap	h13b11	13.022	679.804	112.102	3885.421	21.086
Ctrl MO CO	Complete Overlap
Ctrl MO CO	Complete Overlap	h13b12	9.618	460.178	87.648	1192.687	15.551
Ctrl MO CO	Complete Overlap	h13b12	9.618	666.613	114.088	1582.165	15.551
Ctrl MO CO	Complete Overlap	h13b12	9.618	813.562	122.545	1966.639	15.551
Ctrl MO CO	Complete Overlap	h13b12	9.618	923.025	121.264	2291.099	15.551
Ctrl MO CO	Complete Overlap	h13b12	9.618	1026.668	54.615	2848.916	15.551
Ctrl MO CO	Complete Overlap	h13b12	9.618	953.56	116.551	3115.877	15.551
Ctrl MO CO	Complete Overlap	h13b12	9.618	902.573	107.555	3319.894	15.551
Ctrl MO CO	Complete Overlap	h13b12	9.618	816.112	169.035	3524.748	15.551
Ctrl MO CO	Complete Overlap	h13b12	9.618	772.568	168.4	3829.47	15.551
Ctrl MO CO	Complete Overlap	h13b12	9.618	850.44	271.753	2310.1	15.551
Ctrl MO CO	Complete Overlap
Ctrl MO CO	Complete Overlap	h13b13	10.591	196.261	0	1016.68	17.132
Ctrl MO CO	Complete Overlap	h13b13	10.591	211.123	0.038	968.869	17.132
Ctrl MO CO	Complete Overlap	h13b13	10.591	193.822	2.256	1149.974	17.132
Ctrl MO CO	Complete Overlap	h13b13	10.591	199.994	5.822	758.634	17.132
Ctrl MO CO	Complete Overlap	h13b13	10.266	964.912	123.66	2968.695	16.605
Ctrl MO CO	Complete Overlap	h13b13	10.266	859.175	91.851	3513.358	16.605
Ctrl MO CO	Complete Overlap	h13b13	10.266	745.462	87.718	2630.222	16.605
Ctrl MO CO	Complete Overlap	h13b13	10.266	615.354	89.927	2332.764	16.605
Ctrl MO CO	Complete Overlap	h14b1	11.888	255.247	9.58	1003.762	19.24
Ctrl MO CO	Complete Overlap	h14b1	11.888	388.796	18.096	1922.112	19.24
Ctrl MO CO	Complete Overlap	h14b1	11.888	445.843	12.79	2169.653	19.24
Ctrl MO CO	Complete Overlap	h14b1	11.888	391.895	37.268	2637.454	19.24
Ctrl MO CO	Complete Overlap	h14b1	11.888	368.913	57.77	2143.534	19.24
Ctrl MO CO	Complete Overlap	h14b1	11.888	363.119	21.325	2106.15	19.24
Ctrl MO CO	Complete Overlap	h14b1	11.888	340.059	49.43	1269.552	19.24
Ctrl MO CO	Complete Overlap	h14b1	11.888	319.541	18.924	1363.603	19.24
Ctrl MO CO	Complete Overlap
Ctrl MO CO	Complete Overlap	h14b2	10.05	84.965	0	430.262	16.254
Ctrl MO CO	Complete Overlap	h14b2	10.05	146.757	2.49	1054.55	16.254
Ctrl MO CO	Complete Overlap	h14b2	10.05	215.636	7.818	2002.418	16.254
Ctrl MO CO	Complete Overlap	h14b2	10.05	285.756	29.049	1207.996	16.254
Ctrl MO CO	Complete Overlap	h14b2	10.05	315.515	29.631	1386.586	16.254
Ctrl MO CO	Complete Overlap	h14b2	10.591	361.911	46.5	1529.705	17.132
Ctrl MO CO	Complete Overlap	h14b2	10.591	409.208	43.219	2518.74	17.132
Ctrl MO CO	Complete Overlap	h14b2	10.591	413.454	25.428	3560.551	17.132
Ctrl MO CO	Complete Overlap	h14b2	10.591	346.451	15.338	2690.163	17.132
Ctrl MO CO	Complete Overlap	h15b1	11.942	143.333	9.474	733.153	19.329
Ctrl MO CO	Complete Overlap	h15b1	11.942	202.863	4.213	725.305	19.329
Ctrl MO CO	Complete Overlap	h15b1	11.942	241.168	14.942	802.045	19.329
Ctrl MO CO	Complete Overlap	h15b1	11.942	259.865	34.566	929.109	19.329
Ctrl MO CO	Complete Overlap	h15b1	11.942	282.769	36.512	1304.882	19.329
Ctrl MO CO	Complete Overlap	h15b1	11.942	305.066	50.89	1273.953	19.329
Ctrl MO CO	Complete Overlap	h15b1	11.942	336.669	46.089	2047.376	19.329
Ctrl MO CO	Complete Overlap	h15b1	11.942	349.143	25.293	1914.448	19.329
Ctrl MO CO	Complete Overlap	h15b1	11.942	335.653	8.684	2055.436	19.329
Ctrl MO CO	Complete Overlap
Ctrl MO CO	Complete Overlap	h15b2	8.591	175.182	7.569	601.669	13.882
Ctrl MO CO	Complete Overlap	h15b2	8.591	228.509	28.441	770.853	13.882
Ctrl MO CO	Complete Overlap	h15b2	8.591	278.731	18.029	1117.465	13.882
Ctrl MO CO	Complete Overlap	h15b2	9.402	514.014	45.5	2734.945	15.2
Ctrl MO CO	Complete Overlap	h15b2	9.402	587.176	20.275	3482.298	15.2
Ctrl MO CO	Complete Overlap	h15b2	9.402	596.156	38.778	2751.522	15.2
Ctrl MO CO	Complete Overlap	h15b2	9.402	488.92	48.212	2702.968	15.2
Ctrl MO CO	Complete Overlap	h15b2	9.402	367.182	43.509	1154.733	15.2
Ctrl MO CO	Complete Overlap
Ctrl MO CO	Complete Overlap	h15b3	5.025	296.702	33.15	901.488	8.083
Ctrl MO CO	Complete Overlap	h15b3	5.025	398.459	69.638	1409.445	8.083
Ctrl MO CO	Complete Overlap	h15b3	5.025	496.413	70.372	1258.788	8.083
Ctrl MO CO	Complete Overlap	h15b3	5.025	504.118	56.299	1379.615	8.083
Ctrl MO CO	Complete Overlap	h15b3	5.025	471.318	30.398	1268.773	8.083
Ctrl MO CO	Complete Overlap	h15b3	5.025	383.925	49.972	1339.39	8.083
Ctrl MO CO	Complete Overlap
Ctrl MO CO	Complete Overlap	h15b4	5.998	261.484	33.06	647.932	9.664
Ctrl MO CO	Complete Overlap	h15b4	5.998	362.112	42.608	1186.299	9.664
Ctrl MO CO	Complete Overlap	h15b4	5.998	524.662	29.235	1773.051	9.664
Ctrl MO CO	Complete Overlap	h15b4	5.998	618.152	81.813	1744.038	9.664
Ctrl MO CO	Complete Overlap	h15b4	5.998	564.563	61.054	1490.654	9.664
Ctrl MO CO	Complete Overlap	h15b4	5.998	442.899	67.831	1274.162	9.664
Ctrl MO CO	Complete Overlap	h15b4	5.998	318.413	48.309	839.172	9.664
Ctrl MO CO	Complete Overlap
Ctrl MO CO	Complete Overlap	h15b5	8.591	200.406	4.187	642.244	13.881
Ctrl MO CO	Complete Overlap	h15b5	8.591	259.168	16.389	1067.631	13.881
Ctrl MO CO	Complete Overlap	h15b5	8.591	303.196	10.468	1086.572	13.881
Ctrl MO CO	Complete Overlap	h15b5	8.591	444.934	30.371	3180.76	13.881
Ctrl MO CO	Complete Overlap	h15b5	8.591	519.251	35.573	3627.49	13.881
Ctrl MO CO	Complete Overlap	h15b5	8.591	568.824	39.703	2944.331	13.881
Ctrl MO CO	Complete Overlap	h15b5	8.591	574.778	23.04	2051.278	13.881
Ctrl MO CO	Complete Overlap	h15b5	8.591	513.315	80.837	2480.918	13.881
Ctrl MO PO	Partial Overlap	h9b1	9.186	472.044	35.46	1508.344	14.848
Ctrl MO PO	Partial Overlap	h9b1	9.186	534.447	78.422	1919.207	14.848
Ctrl MO PO	Partial Overlap	h9b1	9.186	549.404	78.939	1810.565	14.848
Ctrl MO PO	Partial Overlap	h9b1	9.186	558.347	91.922	2367.147	14.848
Ctrl MO PO	Partial Overlap	h9b1	9.186	540.166	84.762	2516.445	14.848
Ctrl MO PO	Partial Overlap	h9b1	9.186	478.83	30.248	2135.86	14.848
Ctrl MO PO	Partial Overlap	h9b1	9.186	432.218	9.501	3098.817	14.848
Ctrl MO PO	Partial Overlap
Ctrl MO PO	Partial Overlap	h9b2	10.483	259.372	14.275	764.159	16.957
Ctrl MO PO	Partial Overlap	h9b2	10.483	382.165	48.002	1215.236	16.957
Ctrl MO PO	Partial Overlap	h9b2	10.483	432.127	56.909	1986.684	16.957
Ctrl MO PO	Partial Overlap	h9b2	10.483	511.236	56.586	2085.844	16.957
Ctrl MO PO	Partial Overlap	h9b2	10.483	655.521	75.559	2516.26	16.957
Ctrl MO PO	Partial Overlap	h9b2	10.483	834.096	51.612	3232.873	16.957
Ctrl MO PO	Partial Overlap	h9b2	10.483	857.568	63.004	4044.261	16.957
Ctrl MO PO	Partial Overlap
Ctrl MO PO	Partial Overlap	h9b3	10.158	275.802	32.752	1141.735	16.43
Ctrl MO PO	Partial Overlap	h9b3	10.158	426.804	66.303	1531.176	16.43
Ctrl MO PO	Partial Overlap	h9b3	10.158	450.766	47.677	1675.287	16.43
Ctrl MO PO	Partial Overlap	h9b3	10.158	397.903	50.468	1659.256	16.43
Ctrl MO PO	Partial Overlap	h9b3	10.158	342.746	72.095	1156.146	16.43
Ctrl MO PO	Partial Overlap	h9b3	10.321	817.889	76.6	3466.72	16.693
Ctrl MO PO	Partial Overlap	h9b3	10.321	756.86	18.534	3644.454	16.693
Ctrl MO PO	Partial Overlap	h9b3	10.321	638.157	33.575	3506.145	16.693
Ctrl MO PO	Partial Overlap	h9b3	10.321	467.993	34.16	2527.971	16.693
Ctrl MO PO	Partial Overlap	h10b1	8.375	232.76	11.125	744.723	13.53
Ctrl MO PO	Partial Overlap	h10b1	8.375	348.365	31.012	1206.387	13.53
Ctrl MO PO	Partial Overlap	h10b1	8.375	390.548	36.756	1466.578	13.53
Ctrl MO PO	Partial Overlap	h10b1	8.321	702.521	52.271	2088.682	13.442
Ctrl MO PO	Partial Overlap	h10b1	8.321	735.353	95.601	2598.902	13.442
Ctrl MO PO	Partial Overlap	h10b1	8.321	764.734	80.525	2979.246	13.442
Ctrl MO PO	Partial Overlap	h10b1	8.321	804.766	85.378	2895.384	13.442
Ctrl MO PO	Partial Overlap	h10b1	8.321	750.165	60.558	2703.029	13.442
Ctrl MO PO	Partial Overlap
Ctrl MO PO	Partial Overlap	h10b2	11.401	443.735	50.781	1531.514	18.45
Ctrl MO PO	Partial Overlap	h10b2	11.401	481.91	13.733	1512.963	18.45
Ctrl MO PO	Partial Overlap	h10b2	11.401	538.943	48.055	2065.375	18.45
Ctrl MO PO	Partial Overlap	h10b2	11.401	591.729	66.254	1864.535	18.45
Ctrl MO PO	Partial Overlap	h10b2	11.401	534.705	88.831	1803.855	18.45
Ctrl MO PO	Partial Overlap	h10b2	11.401	412.641	32.165	1371.355	18.45
Ctrl MO PO	Partial Overlap
Ctrl MO PO	Partial Overlap	h10b3	5.89	295.467	25.091	740.389	9.489
Ctrl MO PO	Partial Overlap	h10b3	5.89	522.234	114.301	1539.303	9.489
Ctrl MO PO	Partial Overlap	h10b3	5.89	662.075	159.622	2030.047	9.489
Ctrl MO PO	Partial Overlap	h10b3	5.89	629.522	113.904	1623.145	9.489
Ctrl MO PO	Partial Overlap	h10b3	5.89	543.333	127.286	1197.549	9.489
Ctrl MO PO	Partial Overlap	h10b3	5.89	462.086	100.086	1300.587	9.489
Ctrl MO PO	Partial Overlap	h10b3	5.89	272.394	55.348	770.12	9.489
Ctrl MO PO	Partial Overlap	h12b1	16.318	557.751	15.571	2373.31	26.433
Ctrl MO PO	Partial Overlap	h12b1	16.318	606.847	16.68	2818.232	26.433
Ctrl MO PO	Partial Overlap	h12b1	16.318	521.348	50.26	2442.875	26.433
Ctrl MO PO	Partial Overlap	h12b1	16.318	421.631	51.863	2567.298	26.433
Ctrl MO PO	Partial Overlap	h12b1	16.318	383.041	64.11	2967.189	26.433
Ctrl MO PO	Partial Overlap	h12b1	16.102	931.287	80.221	3745.728	26.084
Ctrl MO PO	Partial Overlap	h12b1	16.102	876.774	105.537	4033.482	26.084
Ctrl MO PO	Partial Overlap
Ctrl MO PO	Partial Overlap	h12b2	11.888	585.878	89.425	2099.608	19.241
Ctrl MO PO	Partial Overlap	h12b2	11.888	658.584	77.441	2835.575	19.241
Ctrl MO PO	Partial Overlap	h12b2	11.888	732.191	67.136	2647.783	19.241
Ctrl MO PO	Partial Overlap	h12b2	11.888	747.148	43.691	3358.982	19.241
Ctrl MO PO	Partial Overlap	h12b2	11.888	703.937	57.099	3661.847	19.241
Ctrl MO PO	Partial Overlap	h12b2	11.888	732.673	103.763	4049.631	19.241
[truncated: 1,482 more rows]
