# Supplementary material for: Stepwise polarisation of developing bilayered epidermis is mediated by aPKC and E-cadherin in zebrafish
Source: eLife. 2020 Jan 22;9:e49064. doi: 10.7554/eLife.49064 (PMC6975926; doi:10.7554/eLife.49064)
Supplement: Figure 6—source data 1. [file elife-49064-fig6-data1.xlsx]

## Sheet: Sheet1
Figure 1
Number of sets	2
Total number of embryos per time point	20
	No of cells quantified
24 hpf	56
36 hpf	62
48 hpf	68
72 hpf	82
Figure 1 - figure supplement 4
Number of sets	2
Total number of embryos - Periderm	29
Total number of embryos - Basal Epidermis	17
	No of cells quantified
Periderm	66
Basal Epidermis	29
Figure 2
Number of sets	4
Total number of embryos per condition	30
Periderm
	No cells quantified
WT sibling	124
apkc/has mutants	147
For Percent cells showing abnormal distribution shown in Figure 2 A7 derived post linear regression fit as shown in Figure 2 - figure supplement 3 A
Genotype	Distribution	Count	total	Percentage
aPKC sib	Abnormal	10	124	8.06452
aPKC sib	Normal	114	124	91.9355
aPKC mut	Abnormal	35	147	23.8095
aPKC mut	Normal	112	147	76.1905
Basal Epidermis
	No cells quantified
WT sibling	134
apkc/has mutants	129
Figure 2- figure supplement 3
Number of sets	Same as Figure 2
Total number of embryos per condition	Same as Figure 2
Tall cells
	No cells quantified
WT sibling	28
apkc/has mutants	63
For Percent cells showing Abnormal Distribution as shown in Figure 2- figure supplement 3 C3
Genotype	Distribution	Count	total	Percentage
aPKC sib	Abnormal	4	28	14.2857
aPKC sib	Normal	24	28	85.7143
aPKC mut	Abnormal	13	63	20.6349
aPKC mut	Normal	50	63	79.3651
Medium/short cells
	No cells quantified
WT sibling	78
apkc/has mutants	82
For Percent cells showing abnormal distribution as shown in Figure 2- figure supplement 3 D3
Genotype	Distribution	Count	total	Percentage
aPKC sib	Abnormal	10	96	10.4167
aPKC sib	Normal	86	96	89.5833
aPKC mut	Abnormal	25	84	29.7619
aPKC mut	Normal	59	84	70.2381
Figure 2- figure supplement 4
Number of sets	4
Total number of embryos - apkc mut/sib - Ecad mCherry	45
Total number of embryos- apkc mut/sib - CAAX mCherry (Fig 2 - fig. suppl. 4- B)	16
	No cells quantified
WT sibling - Ecad mCherry	115
apkc/has mutants-Ecad mCherry	125
WT sibling - CAAX mCherry (Fig 2 - fig. suppl. 4- B)	32
apkc/has mutants-CAAX mCherry (Fig 2 - fig. suppl. 4- B)	37
For Percent cells showing abnormal distribution as shown in Figure 2- figure supplement 4 E
Genotype	Distribution	Count	total	Percentage
aPKC sib	Abnormal	14	115	12.1739
aPKC sib	Normal	101	115	87.8261
aPKC mut	Abnormal	40	125	32
aPKC mut	Normal	85	125	68
Figure 3
Number of sets	3
Total number of embryos per condition	27
Periderm
	No cells quantified
WT sibling	113
pen/lgl2 mutants	108
Basal epidermis
	No cells quantified
WT sibling	127
pen/lgl2 mutants	106
Figure 4
Number of sets (including Figure 4- figure supplement 2)	3
Total number of embryos per condition (including Figure 4- figure supplement 2) - Periderm	22
Total number of embryos per condition (including Figure 4- figure supplement 2) - Basal Epidermis	42
Effect on E-cadherin
Periderm
Total clones	23
Clones showing effect	19
Basal Epidermis
Total clones	44
Clones showing effect	36
Boundaries quantified
For Figure 4 B
Ctrl MO C-C	48
Ctrl MO N-C	32
Ctrl MO N-N	23
Ecad MO C-C	28
Ecad MO N-C	44
Ecad MO N-N	22
For Figure 4 C
Ctrl MO CO	48
Ctrl MO PO	24
Ctrl MO NO	17
Ecad MO CO	37
Ecad MO PO	12
Ecad MO NO	13
For Figure 4 E
Ctrl MO CO	41
Ctrl MO PO	21
Ctrl MO NO	40
Ecad MO CO	69
Ecad MO PO	20
Ecad MO NO	36
For Figure 4 F
Ctrl MO C-C	37
Ctrl MO N-C	78
Ctrl MO N-N	64
Ecad MO C-C	42
Ecad MO N-C	89
Ecad MO N-N	48
Figure 4- figure supplement 2
Boundaries quantified
For Figure 4- figure supplement 2 A1
Ctrl MO C-C	13
Ctrl MO N-C	37
Ctrl MO N-N	26
Ecad MO C-C	31
Ecad MO N-C	50
Ecad MO N-N	26
For Figure 4- figure supplement 2 A2
Ctrl MO CO	30
Ctrl MO PO	16
Ctrl MO NO	23
Ecad MO CO	41
Ecad MO PO	22
Ecad MO NO	27
For Figure 4- figure supplement 2 B1
Ctrl MO CO	25
Ctrl MO PO	24
Ctrl MO NO	46
Ecad MO CO	29
Ecad MO PO	13
Ecad MO NO	44
For Figure 4- figure supplement 2 B2
Ctrl MO C-C	29
Ctrl MO N-C	60
Ctrl MO N-N	51
Ecad MO C-C	46
Ecad MO N-C	54
Ecad MO N-N	60
For Figure 4- figure supplement 2 C1
Ctrl MO C-C	20
Ctrl MO N-C	28
Ctrl MO N-N	10
Ecad MO C-C	6
Ecad MO N-C	6
Ecad MO N-N	5
For Figure 4- figure supplement 2 C2
Ctrl MO CO	20
Ctrl MO PO	2
Ctrl MO NO	3
Ecad MO CO	8
Ecad MO PO	8
Ecad MO NO	4
For Figure 4- figure supplement 2 D1
Ctrl MO CO	55
Ctrl MO PO	10
Ctrl MO NO	26
Ecad MO CO	44
Ecad MO PO	33
Ecad MO NO	40
For Figure 4- figure supplement 2 D2
Ctrl MO C-C	54
Ctrl MO N-C	50
Ctrl MO N-N	37
Ecad MO C-C	35
Ecad MO N-C	57
Ecad MO N-N	40
Figure 5
Number of sets	3
Total number of embryos for aPKC	18
Total number of embryos for Lgl	32
Effect on aPKC
Total clones	18
Clones showing effect	14
Effect on Lgl
Total clones	34
Clones showing effect	27
Boundaries quantified
Figure 5 B5
Ctrl MO C-C	47
Ctrl MO N-C	87
Ctrl MO N-N	47
Ecad MO C-C	59
Ecad MO N-C	94
Ecad MO N-N	45
Figure 5 B6
Ctrl MO CO	79
Ctrl MO PO	38
Ctrl MO NO	39
Ecad MO CO	78
Ecad MO PO	37
Ecad MO NO	34
Figure 5 C5
Ctrl MO C-C	68
Ctrl MO N-C	138
Ctrl MO N-N	120
Ecad MO C-C	95
Ecad MO N-C	140
Ecad MO N-N	104
Figure 5 C6
Ctrl MO CO	73
Ctrl MO PO	47
Ctrl MO NO	74
Ecad MO CO	108
Ecad MO PO	47
Ecad MO NO	71
For Figure 5- figure supplement 4
Effect on Lgl
Total clones	19
Clones showing effect	16
Effect on aPKC
Total clones	15
Clones showing effect	0
